# Supplementary material for: Sulfur alleviates arsenic toxicity by reducing its accumulation and modulating proteome, amino acids and thiol metabolism in rice leaves
Source: PubMed Central journal article supplement (PMC4639781; doi:10.1038/srep16205), 2015-11-10
Supplement: srep16205-s2.pdf [file srep16205-s2.pdf]

MATRIX SCIENCE Mascot Search Results

Peptide View Spot no 0

MS/MS Fragmentation of **NNAGFPHNVVFEDEAVPSGVDSK**

Found in **gi115465862** in **NCBIInr**, Os06g0101600 [Oryza sativa Japonica Group]

Match to Query 31: 2513.339624 from(2514,346900,1+) intensity(0.0000) index(12)

Title: Label: H6, Spot\_Id: 228929, Peak\_List\_Id: 257551, MSMS Job\_Run\_Id: 24925, Comment:

Data file ppw\_H6\_138985133400.txt

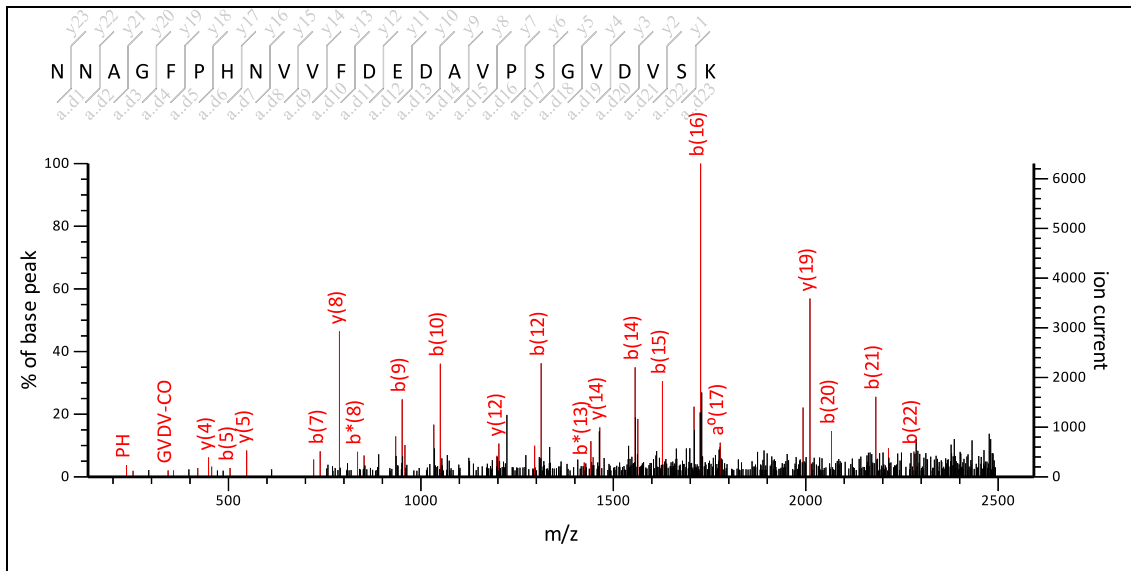

Navigation icons and search range: 135.09 to 2592.79

Label all possible matches  Label matches used for scoring

Monoisotopic mass of neutral peptide Mr(calc): 2513.1823  
 Fixed modifications: Carbamidomethyl (C) (apply to specified residues or termini only)  
 Ions Score: 72 Expect: 7.9e-05  
 Matches : 45/461 fragment ions using 86 most intense peaks ([help](#))

| #  | Immon.   | a         | a*        | a <sup>0</sup> | b         | b*        | b <sup>0</sup> | d         | Seq. | v         | w         | y         | y*        | y <sup>0</sup> | #  |
|----|----------|-----------|-----------|----------------|-----------|-----------|----------------|-----------|------|-----------|-----------|-----------|-----------|----------------|----|
| 1  | 87.0553  | 87.0553   | 70.0287   |                | 115.0502  | 98.0237   |                | 44.0495   | N    |           |           |           |           |                | 24 |
| 2  | 87.0553  | 201.0982  | 184.0717  |                | 229.0931  | 212.0666  |                | 158.0924  | N    | 2341.1095 | 2340.1143 | 2400.1466 | 2383.1201 | 2382.1361      | 23 |
| 3  | 44.0495  | 272.1353  | 255.1088  |                | 300.1302  | 283.1037  |                |           | A    | 2270.0724 |           | 2286.1037 | 2269.0772 | 2268.0931      | 22 |
| 4  | 30.0338  | 329.1568  | 312.1302  |                | 357.1517  | 340.1252  |                |           | G    |           |           | 2215.0666 | 2198.0400 | 2197.0560      | 21 |
| 5  | 120.0808 | 476.2252  | 459.1987  |                | 504.2201  | 487.1936  |                |           | F    | 2065.9825 |           | 2158.0451 | 2141.0186 | 2140.0346      | 20 |
| 6  | 70.0651  | 573.2780  | 556.2514  |                | 601.2729  | 584.2463  |                | 547.2623  | P    | 1968.9298 | 1967.9345 | 2010.9767 | 1993.9502 | 1992.9661      | 19 |
| 7  | 110.0713 | 710.3369  | 693.3103  |                | 738.3318  | 721.3052  |                |           | H    | 1831.8708 |           | 1913.9239 | 1896.8974 | 1895.9134      | 18 |
| 8  | 87.0553  | 824.3798  | 807.3533  |                | 852.3747  | 835.3482  |                | 781.3740  | N    | 1717.8279 | 1716.8327 | 1776.8650 | 1759.8385 | 1758.8545      | 17 |
| 9  | 72.0808  | 923.4482  | 906.4217  |                | 951.4431  | 934.4166  |                | 909.4326  | V    | 1618.7595 | 1631.7799 | 1662.8221 | 1645.7956 | 1644.8115      | 16 |
| 10 | 72.0808  | 1022.5166 | 1005.4901 |                | 1050.5116 | 1033.4850 |                | 1008.5010 | V    | 1519.6911 | 1532.7115 | 1563.7537 | 1546.7271 | 1545.7431      | 15 |
| 11 | 120.0808 | 1169.5851 | 1152.5585 |                | 1197.5800 | 1180.5534 |                |           | F    | 1372.6227 |           | 1464.6853 | 1447.6587 | 1446.6747      | 14 |
| 12 | 88.0393  | 1284.6120 | 1267.5854 | 1266.6014      | 1312.6069 | 1295.5804 | 1294.5963      | 1240.6222 | D    | 1257.5957 | 1256.6005 | 1317.6169 | 1300.5903 | 1299.6063      | 13 |
| 13 | 102.0550 | 1413.6546 | 1396.6280 | 1395.6440      | 1441.6495 | 1424.6230 | 1423.6389      | 1355.6491 | E    | 1128.5531 | 1127.5579 | 1202.5899 | 1185.5634 | 1184.5794      | 12 |
| 14 | 88.0393  | 1528.6815 | 1511.6550 | 1510.6710      | 1556.6764 | 1539.6499 | 1538.6659      | 1484.6917 | D    | 1013.5262 | 1012.5310 | 1073.5473 | 1056.5208 | 1055.5368      | 11 |
| 15 | 44.0495  | 1599.7186 | 1582.6921 | 1581.7081      | 1627.7136 | 1610.6870 | 1609.7030      |           | A    | 942.4891  |           | 958.5204  | 941.4938  | 940.5098       | 10 |
| 16 | 72.0808  | 1698.7871 | 1681.7605 | 1680.7765      | 1726.7820 | 1709.7554 | 1708.7714      | 1684.7714 | V    | 843.4207  | 856.4411  | 887.4833  | 870.4567  | 869.4727       | 9  |
| 17 | 70.0651  | 1795.8398 | 1778.8133 | 1777.8293      | 1823.8347 | 1806.8082 | 1805.8242      | 1769.8242 | P    | 746.3679  | 745.3727  | 788.4149  | 771.3883  | 770.4043       | 8  |
| 18 | 60.0444  | 1882.8719 | 1865.8453 | 1864.8613      | 1910.8668 | 1893.8402 | 1892.8562      | 1866.8769 | S    | 659.3359  | 658.3406  | 691.3621  | 674.3355  | 673.3515       | 7  |
| 19 | 30.0338  | 1939.8933 | 1922.8668 | 1921.8828      | 1967.8882 | 1950.8617 | 1949.8777      |           | G    |           |           | 604.3301  | 587.3035  | 586.3195       | 6  |

|    |          |           |           |           |                  |           |           |           |   |          |          |                 |          |          |   |
|----|----------|-----------|-----------|-----------|------------------|-----------|-----------|-----------|---|----------|----------|-----------------|----------|----------|---|
| 20 | 72.0808  | 2038.9617 | 2021.9352 | 2020.9512 | <b>2066.9566</b> | 2049.9301 | 2048.9461 | 2024.9461 | V | 503.2460 | 516.2664 | <b>547.3086</b> | 530.2821 | 529.2980 | 5 |
| 21 | 88.0393  | 2153.9887 | 2136.9621 | 2135.9781 | <b>2181.9836</b> | 2164.9570 | 2163.9730 | 2109.9988 | D | 388.2191 | 387.2238 | <b>448.2402</b> | 431.2136 | 430.2296 | 4 |
| 22 | 72.0808  | 2253.0571 | 2236.0305 | 2235.0465 | <b>2281.0520</b> | 2264.0255 | 2263.0414 | 2239.0414 | V | 289.1506 | 302.1710 | 333.2132        | 316.1867 | 315.2027 | 3 |
| 23 | 60.0444  | 2340.0891 | 2323.0626 | 2322.0785 | 2368.0840        | 2351.0575 | 2350.0735 | 2324.0942 | S | 202.1186 | 201.1234 | 234.1448        | 217.1183 | 216.1343 | 2 |
| 24 | 101.1073 |           |           |           |                  |           |           |           | K | 74.0237  | 73.0284  | 147.1128        | 130.0863 |          | 1 |

| Seq      | ya       | yb              | Seq     | ya              | yb              | Seq     | ya              | yb              |
|----------|----------|-----------------|---------|-----------------|-----------------|---------|-----------------|-----------------|
| NA       | 158.0924 | 186.0873        | NAG     | 215.1139        | 243.1088        | NAGF    | 362.1823        | 390.1772        |
| NAGFP    | 459.2350 | 487.2300        | NAGFPH  | 596.2940        | 624.2889        | AG      | 101.0709        | 129.0659        |
| AGF      | 248.1394 | 276.1343        | AGFP    | 345.1921        | 373.1870        | AGFPH   | 482.2510        | 510.2459        |
| AGFPHN   | 596.2940 | 624.2889        | AGFPHNV | 695.3624        | 723.3573        | GF      | 177.1022        | 205.0972        |
| GFP      | 274.1550 | 302.1499        | GFPH    | 411.2139        | 439.2088        | GFPHN   | 525.2568        | 553.2518        |
| GFPHNV   | 624.3253 | 652.3202        | FP      | 217.1335        | 245.1285        | FPH     | 354.1925        | 382.1874        |
| FPHN     | 468.2354 | 496.2303        | FPHNV   | 567.3038        | 595.2987        | FPHNVV  | 666.3722        | 694.3671        |
| PH       | 207.1240 | <b>235.1190</b> | PHN     | 321.1670        | 349.1619        | PHNV    | <b>420.2354</b> | <b>448.2303</b> |
| PHNVV    | 519.3038 | <b>547.2987</b> | PHNVVF  | 666.3722        | 694.3671        | HN      | 224.1142        | <b>252.1091</b> |
| HNV      | 323.1826 | 351.1775        | HNVV    | 422.2510        | 450.2459        | HNVVF   | 569.3194        | 597.3144        |
| HNVVFD   | 684.3464 | 712.3413        | NV      | 186.1237        | 214.1186        | NVV     | 285.1921        | 313.1870        |
| NVVF     | 432.2605 | 460.2554        | NVVFD   | <b>547.2875</b> | 575.2824        | NVVFDE  | 676.3301        | 704.3250        |
| VV       | 171.1492 | 199.1441        | VVF     | 318.2176        | 346.2125        | VVFD    | 433.2445        | 461.2395        |
| VVFDE    | 562.2871 | 590.2821        | VVFDED  | 677.3141        | 705.3090        | VF      | 219.1492        | 247.1441        |
| VFD      | 334.1761 | 362.1710        | VFDE    | 463.2187        | 491.2136        | VFDED   | 578.2457        | 606.2406        |
| VFDEDA   | 649.2828 | 677.2777        | FD      | <b>235.1077</b> | 263.1026        | FDE     | 364.1503        | 392.1452        |
| FDED     | 479.1773 | 507.1722        | FDEDA   | 550.2144        | 578.2093        | FDEDAV  | 649.2828        | 677.2777        |
| DE       | 217.0819 | 245.0768        | DED     | 332.1088        | 360.1038        | DEDA    | 403.1460        | 431.1409        |
| DEDAV    | 502.2144 | 530.2093        | DEDAVP  | 599.2671        | 627.2620        | DEDAVPS | 686.2992        | 714.2941        |
| ED       | 217.0819 | 245.0768        | EDA     | 288.1190        | 316.1139        | EDAV    | 387.1874        | 415.1823        |
| EDAVP    | 484.2402 | 512.2351        | EDAVPS  | 571.2722        | 599.2671        | EDAVPSG | 628.2937        | 656.2886        |
| DA       | 159.0764 | 187.0713        | DAV     | 258.1448        | 286.1397        | DAVP    | 355.1976        | 383.1925        |
| DAVPS    | 442.2296 | 470.2245        | DAVPSG  | 499.2511        | 527.2460        | DAVPSGV | 598.3195        | 626.3144        |
| AV       | 143.1179 | 171.1128        | AVP     | 240.1707        | 268.1656        | AVPS    | 327.2027        | 355.1976        |
| AVPSG    | 384.2241 | 412.2191        | AVPSGV  | 483.2926        | 511.2875        | AVPSGVD | 598.3195        | 626.3144        |
| AVPSGVDV | 697.3879 | 725.3828        | VP      | 169.1335        | 197.1285        | VPS     | 256.1656        | 284.1605        |
| VPSG     | 313.1870 | 341.1819        | VPSGV   | 412.2554        | 440.2504        | VPSGVD  | 527.2824        | 555.2773        |
| VPSGVDV  | 626.3508 | 654.3457        | PS      | 157.0972        | 185.0921        | PSG     | 214.1186        | 242.1135        |
| PSGV     | 313.1870 | 341.1819        | PSGVD   | 428.2140        | <b>456.2089</b> | PSGVDV  | 527.2824        | 555.2773        |
| PSGVDVS  | 614.3144 | 642.3093        | SG      | 117.0659        | 145.0608        | SGV     | 216.1343        | 244.1292        |
| SGVD     | 331.1612 | 359.1561        | SGVDV   | 430.2296        | 458.2245        | SGVDVS  | 517.2617        | 545.2566        |
| GV       | 129.1022 | 157.0972        | GVD     | 244.1292        | 272.1241        | GVDV    | <b>343.1976</b> | 371.1925        |
| GVDVS    | 430.2296 | 458.2245        | VD      | 187.1077        | 215.1026        | VDV     | 286.1761        | 314.1710        |
| VDVS     | 373.2082 | 401.2031        | DV      | 187.1077        | 215.1026        | DVS     | 274.1397        | 302.1347        |
| VS       | 159.1128 | 187.1077        |         |                 |                 |         |                 |                 |

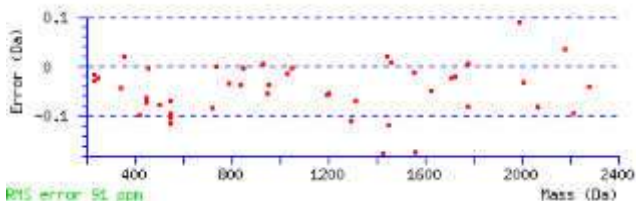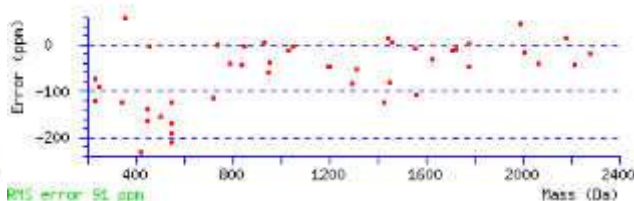

NCBI BLAST search of [NNAGFPHNVVFDEDAVPSGVDVSK](#)  
 (Parameters: blastp, nr protein database, expect=20000, no filter, PAM30)  
 Other BLAST [web gateways](#)

## All matches to this query

| Score | Mr(calc)  | Delta  | Sequence                                 |
|-------|-----------|--------|------------------------------------------|
| 72.4  | 2513.1823 | 0.1573 | <a href="#">NNAGFPHNVVFEDEAVPSGVDVSK</a> |
| 34.0  | 2513.1459 | 0.1937 | <a href="#">NNAGFPHNVVFEDEVPGGVDASK</a>  |
| 6.8   | 2513.3278 | 0.0118 | <a href="#">DARIFPOEIHFFPAVLVDGATGR</a>  |
| 3.3   | 2513.2142 | 0.1255 | <a href="#">KTMDVQLYTEVMESVOTIDAGR</a>   |
| 2.6   | 2513.2299 | 0.1097 | <a href="#">GLEQSYDTPNPQLIAVSNQHER</a>   |
| 1.9   | 2513.2591 | 0.0805 | <a href="#">GNOFEVLVDSINGDFFLTGKWK</a>   |
| 0.9   | 2513.1203 | 0.2194 | <a href="#">AGDPYEMFTHDELIVMGRDASK</a>   |
| 0.8   | 2513.2121 | 0.1275 | <a href="#">YVQLANVYAAEGNWAEMGRISR</a>   |
| 0.2   | 2513.0958 | 0.2438 | <a href="#">KDFGYSFLCHGLGQGNTYDEST</a>   |

Mascot: <http://www.matrixscience.com/>



# Mascot Search Results

## Peptide View **Spot no 2**

MS/MS Fragmentation of **GVYQFVDK**

Found in **gi|1835731** in **NCBI nr**, photosystem II 10 kDa polypeptide [Oryza sativa Indica Group]

Match to Query 51: 954.464404 from(955.471680,1+) intensity(0.0000) index(6)

Title: Label: K5, Spot\_Id: 219748, Peak\_List\_Id: 225860, MSMS Job\_Run\_Id: 21792, Comment:

Data file C:\Documents and Settings\Administrator\Desktop\farah BHU\spot set plate\Farah-Garima 11May 2013\ppw\_K5\_136842223800.txt

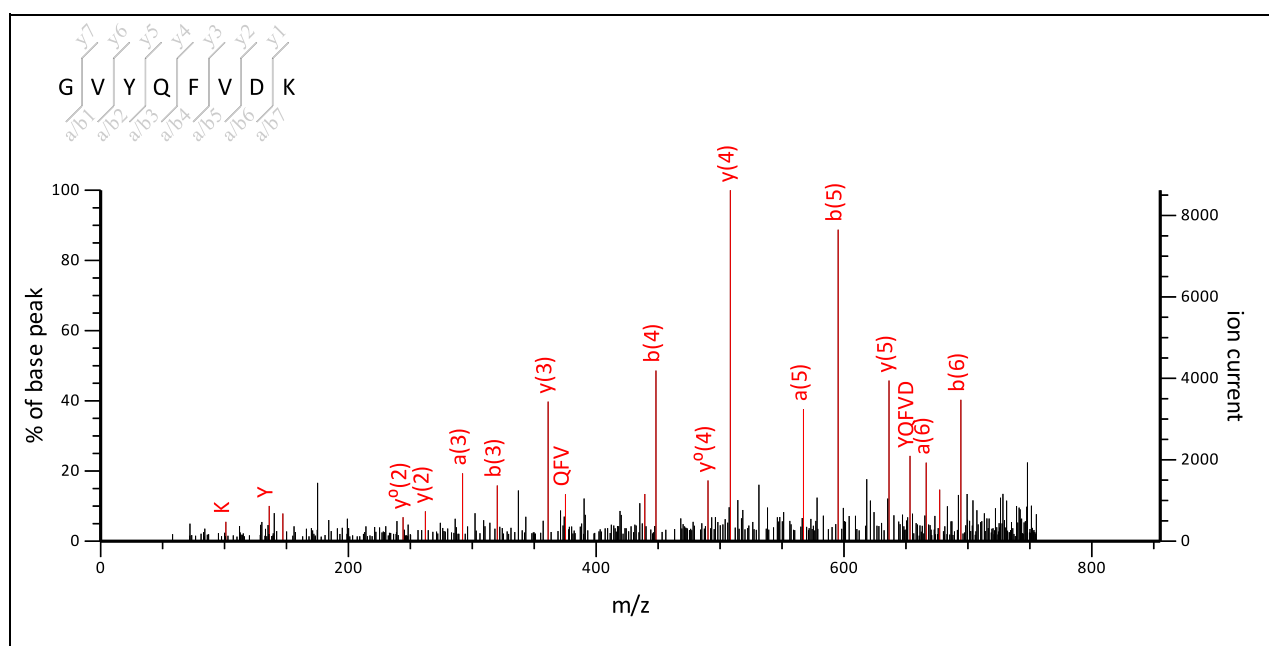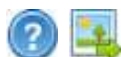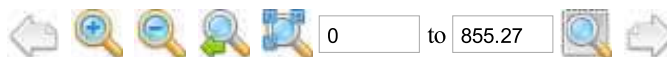

Label all possible matches  Label matches used for scoring

**Monoisotopic mass of neutral peptide Mr(calc):** 954.4811

**Fixed modifications:** Carbamidomethyl (C) (apply to specified residues or termini only)

**Ions Score:** 34 **Expect:** 0.67

**Matches:** 23/97 fragment ions using 28 most intense peaks ([help](#))

| # | Immon.   | a        | a*       | a <sup>0</sup> | b        | b*       | b <sup>0</sup> | d        | Seq. | v        | w        | y        | y*       | y <sup>0</sup> | # |
|---|----------|----------|----------|----------------|----------|----------|----------------|----------|------|----------|----------|----------|----------|----------------|---|
| 1 | 30.0338  | 30.0338  |          |                | 58.0287  |          |                | 44.0495  | G    |          |          |          |          |                | 8 |
| 2 | 72.0808  | 129.1022 |          |                | 157.0972 |          |                | 115.0866 | V    | 854.4043 | 867.4247 | 898.4669 | 881.4403 | 880.4563       | 7 |
| 3 | 136.0757 | 292.1656 |          |                | 320.1605 |          |                |          | Y    | 691.3410 |          | 799.3985 | 782.3719 | 781.3879       | 6 |
| 4 | 101.0709 | 420.2241 | 403.1976 |                | 448.2191 | 431.1925 |                | 363.2027 | Q    | 563.2824 | 562.2871 | 636.3352 | 619.3086 | 618.3246       | 5 |
| 5 | 120.0808 | 567.2926 | 550.2660 |                | 595.2875 | 578.2609 |                |          | F    | 416.2140 |          | 508.2766 | 491.2500 | 490.2660       | 4 |
| 6 | 72.0808  | 666.3610 | 649.3344 |                | 694.3559 | 677.3293 |                | 652.3453 | V    | 317.1456 | 330.1660 | 361.2082 | 344.1816 | 343.1976       | 3 |
| 7 | 88.0393  | 781.3879 | 764.3614 | 763.3774       | 809.3828 | 792.3563 | 791.3723       | 737.3981 | D    | 202.1186 | 201.1234 | 262.1397 | 245.1132 | 244.1292       | 2 |
| 8 | 101.1073 |          |          |                |          |          |                |          | K    | 74.0237  | 73.0284  | 147.1128 | 130.0863 |                | 1 |

| Seq   | ya       | yb       | Seq   | ya       | yb       | Seq  | ya       | yb       |
|-------|----------|----------|-------|----------|----------|------|----------|----------|
| VY    | 235.1441 | 263.1390 | VYQ   | 363.2027 | 391.1976 | VYQF | 510.2711 | 538.2660 |
| VYQFV | 609.3395 | 637.3344 | YQ    | 264.1343 | 292.1292 | YQF  | 411.2027 | 439.1976 |
| YQFV  | 510.2711 | 538.2660 | YQFVD | 625.2980 | 653.2930 | QF   | 248.1394 | 276.1343 |
| QFV   | 347.2078 | 375.2027 | QFVD  | 462.2347 | 490.2296 | FV   | 219.1492 | 247.1441 |



|            |          |          |           |          |          |  |  |  |
|------------|----------|----------|-----------|----------|----------|--|--|--|
| <b>FVD</b> | 334.1761 | 362.1710 | <b>VD</b> | 187.1077 | 215.1026 |  |  |  |
|------------|----------|----------|-----------|----------|----------|--|--|--|

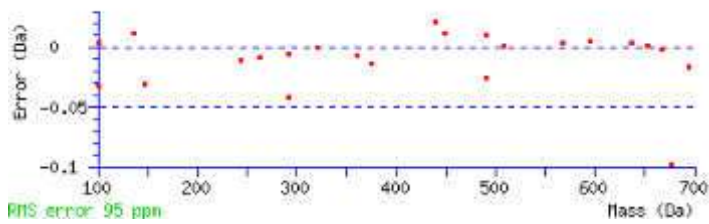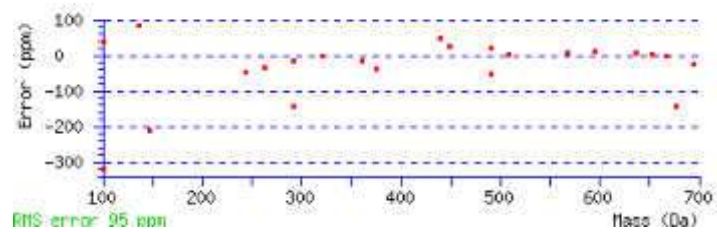

NCBI **BLAST** search of [GVYQFVDK](#)

(Parameters: blastp, nr protein database, expect=20000, no filter, PAM30)

Other BLAST [web gateways](#)

#### All matches to this query

| Score | Mr(calc) | Delta   | Sequence                  |
|-------|----------|---------|---------------------------|
| 34.3  | 954.4811 | -0.0167 | <a href="#">GVYQFVDK</a>  |
| 28.3  | 954.3964 | 0.0680  | <a href="#">SSDMASVDK</a> |
| 26.9  | 954.3964 | 0.0680  | <a href="#">TDGSSMVDK</a> |
| 25.6  | 954.4117 | 0.0527  | <a href="#">FNDAMVDK</a>  |
| 24.4  | 954.4077 | 0.0568  | <a href="#">MTSSTSDAR</a> |
| 24.4  | 954.3865 | 0.0779  | <a href="#">NFADMGER</a>  |
| 24.3  | 954.5076 | -0.0432 | <a href="#">VYGKFWR</a>   |
| 24.2  | 954.4447 | 0.0197  | <a href="#">NFGFEVDK</a>  |
| 24.2  | 954.4845 | -0.0200 | <a href="#">TMKSFVDK</a>  |
| 23.8  | 954.4593 | 0.0051  | <a href="#">VYGRMADK</a>  |

Mascot: <http://www.matrixscience.com/>

**MATRIX SCIENCE Mascot Search Results**

**Peptide View Spot no 2**

MS/MS Fragmentation of **TDKPYGIGGGMSVDIDASGR**

Found in **gi|1835731** in **NCBI nr**, photosystem II 10 kDa polypeptide [Oryza sativa Indica Group]

Match to Query 175: 1994.933424 from(1995.940700,1+) intensity(0.0000) index(27)

Title: Label: K5, Spot\_Id: 219748, Peak\_List\_Id: 225865, MSMS Job\_Run\_Id: 21792, Comment:

Data file C:\Documents and Settings\Administrator\Desktop\farah BHU\spot set plate\Farah-Garima 11May 2013\ppw\_K5\_136842223800.txt

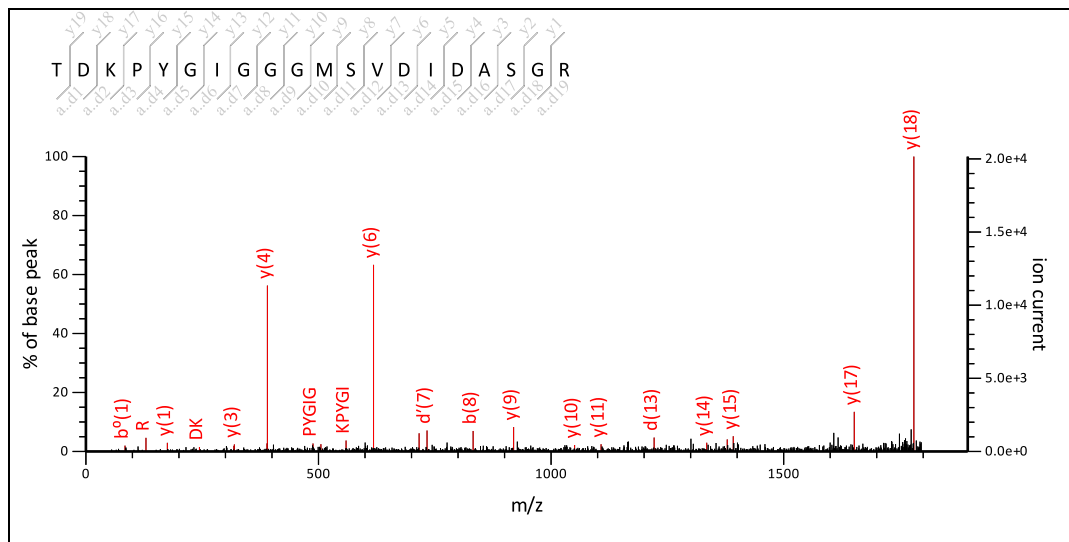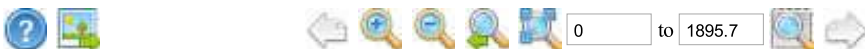

Label all possible matches  Label matches used for scoring

Monoisotopic mass of neutral peptide Mr(calc): 1994.9368

Fixed modifications: Carbamidomethyl (C) (apply to specified residues or termini only)

Ions Score: 124 Expect: 6.1e-10

Matches : 33/401 fragment ions using 36 most intense peaks (help)

| #  | Immon.   | a         | a*        | a <sup>0</sup> | b         | b*        | b <sup>0</sup> | d         | d'        | Seq. | v         | w         | w'        | y         | y*        |
|----|----------|-----------|-----------|----------------|-----------|-----------|----------------|-----------|-----------|------|-----------|-----------|-----------|-----------|-----------|
| 1  | 74.0600  | 74.0600   |           | 56.0495        | 102.0550  |           | 84.0444        | 44.0495   |           | T    |           |           |           |           |           |
| 2  | 88.0393  | 189.0870  |           | 171.0764       | 217.0819  |           | 199.0713       | 145.0972  |           | D    | 1834.8752 | 1833.8800 |           | 1894.8964 | 1877.8698 |
| 3  | 101.1073 | 317.1819  | 300.1554  | 299.1714       | 345.1769  | 328.1503  | 327.1663       | 260.1241  |           | K    | 1706.7803 | 1705.7850 |           | 1779.8694 | 1762.8429 |
| 4  | 70.0651  | 414.2347  | 397.2082  | 396.2241       | 442.2296  | 425.2031  | 424.2191       | 388.2191  |           | P    | 1609.7275 | 1608.7322 |           | 1651.7744 | 1634.7479 |
| 5  | 136.0757 | 577.2980  | 560.2715  | 559.2875       | 605.2930  | 588.2664  | 587.2824       |           |           | Y    | 1446.6642 |           |           | 1554.7217 | 1537.6951 |
| 6  | 30.0338  | 634.3195  | 617.2930  | 616.3089       | 662.3144  | 645.2879  | 644.3039       |           |           | G    |           |           |           | 1391.6584 | 1374.6318 |
| 7  | 86.0964  | 747.4036  | 730.3770  | 729.3930       | 775.3985  | 758.3719  | 757.3879       | 719.3723  | 733.3879  | I    | 1276.5586 | 1289.5790 | 1303.5947 | 1334.6369 | 1317.6103 |
| 8  | 30.0338  | 804.4250  | 787.3985  | 786.4145       | 832.4199  | 815.3934  | 814.4094       |           |           | G    |           |           |           | 1221.5528 | 1204.5263 |
| 9  | 30.0338  | 861.4465  | 844.4199  | 843.4359       | 889.4414  | 872.4149  | 871.4308       |           |           | G    |           |           |           | 1164.5314 | 1147.5048 |
| 10 | 30.0338  | 918.4680  | 901.4414  | 900.4574       | 946.4629  | 929.4363  | 928.4523       |           |           | G    |           |           |           | 1107.5099 | 1090.4834 |
| 11 | 104.0528 | 1049.5084 | 1032.4819 | 1031.4979      | 1077.5034 | 1060.4768 | 1059.4928      | 989.5051  |           | M    | 974.4538  | 973.4585  |           | 1050.4884 | 1033.4619 |
| 12 | 60.0444  | 1136.5405 | 1119.5139 | 1118.5299      | 1164.5354 | 1147.5088 | 1146.5248      | 1120.5456 |           | S    | 887.4217  | 886.4265  |           | 919.4480  | 902.4214  |
| 13 | 72.0808  | 1235.6089 | 1218.5823 | 1217.5983      | 1263.6038 | 1246.5773 | 1245.5932      | 1221.5932 |           | V    | 788.3533  | 801.3737  |           | 832.4159  | 815.3894  |
| 14 | 88.0393  | 1350.6358 | 1333.6093 | 1332.6253      | 1378.6307 | 1361.6042 | 1360.6202      | 1306.6460 |           | D    | 673.3264  | 672.3311  |           | 733.3475  | 716.3210  |
| 15 | 86.0964  | 1463.7199 | 1446.6933 | 1445.7093      | 1491.7148 | 1474.6883 | 1473.7042      | 1435.6886 | 1449.7042 | I    | 560.2423  | 573.2627  | 587.2784  | 618.3206  | 601.2940  |
| 16 | 88.0393  | 1578.7468 | 1561.7203 | 1560.7363      | 1606.7418 | 1589.7152 | 1588.7312      | 1534.7570 |           | D    | 445.2154  | 444.2201  |           | 505.2365  | 488.2100  |
| 17 | 44.0495  | 1649.7840 | 1632.7574 | 1631.7734      | 1677.7789 | 1660.7523 | 1659.7683      |           |           | A    | 374.1783  |           |           | 390.2096  | 373.1830  |
| 18 | 60.0444  | 1736.8160 | 1719.7894 | 1718.8054      | 1764.8109 | 1747.7843 | 1746.8003      | 1720.8211 |           | S    | 287.1462  | 286.1510  |           | 319.1724  | 302.1459  |
| 19 | 30.0338  | 1793.8374 | 1776.8109 | 1775.8269      | 1821.8324 | 1804.8058 | 1803.8218      |           |           | G    |           |           |           | 232.1404  | 215.1139  |
| 20 | 129.1135 |           |           |                |           |           |                |           |           | R    | 74.0237   | 73.0284   |           | 175.1190  | 158.0924  |

| Seq | ya       | yb       | Seq | ya       | yb       | Seq  | ya       | yb       |
|-----|----------|----------|-----|----------|----------|------|----------|----------|
| DK  | 216.1343 | 244.1292 | DKP | 313.1870 | 341.1819 | DKPY | 476.2504 | 504.2453 |

|          |          |          |          |          |          |          |          |          |
|----------|----------|----------|----------|----------|----------|----------|----------|----------|
| DKPYG    | 533.2718 | 561.2667 | DKPYGI   | 646.3559 | 674.3508 | KP       | 198.1601 | 226.1550 |
| KPY      | 361.2234 | 389.2183 | KPYG     | 418.2449 | 446.2398 | KPYGI    | 531.3289 | 559.3239 |
| KPYGIG   | 588.3504 | 616.3453 | KPYGIGG  | 645.3719 | 673.3668 | PY       | 233.1285 | 261.1234 |
| PYG      | 290.1499 | 318.1448 | PYGI     | 403.2340 | 431.2289 | PYGIG    | 460.2554 | 488.2504 |
| PYGIGG   | 517.2769 | 545.2718 | PYGIGGG  | 574.2984 | 602.2933 | YG       | 193.0972 | 221.0921 |
| YGI      | 306.1812 | 334.1761 | YGIG     | 363.2027 | 391.1976 | YGIGG    | 420.2241 | 448.2191 |
| YGIGGG   | 477.2456 | 505.2405 | YGIGGGM  | 608.2861 | 636.2810 | YGIGGGMS | 695.3181 | 723.3130 |
| GI       | 143.1179 | 171.1128 | GIG      | 200.1394 | 228.1343 | GIGG     | 257.1608 | 285.1557 |
| GIGGG    | 314.1823 | 342.1772 | GIGGGM   | 445.2228 | 473.2177 | GIGGGMS  | 532.2548 | 560.2497 |
| GIGGGMSV | 631.3232 | 659.3181 | IG       | 143.1179 | 171.1128 | IGG      | 200.1394 | 228.1343 |
| IGGG     | 257.1608 | 285.1557 | IGGGM    | 388.2013 | 416.1962 | IGGGMS   | 475.2333 | 503.2282 |
| IGGGMSV  | 574.3017 | 602.2967 | IGGGMSVD | 689.3287 | 717.3236 | GG       | 87.0553  | 115.0502 |
| GGG      | 144.0768 | 172.0717 | GGGM     | 275.1172 | 303.1122 | GGGMS    | 362.1493 | 390.1442 |
| GGGMSV   | 461.2177 | 489.2126 | GGGMSVD  | 576.2446 | 604.2395 | GGGMSVDI | 689.3287 | 717.3236 |
| GG       | 87.0553  | 115.0502 | GGM      | 218.0958 | 246.0907 | GGMS     | 305.1278 | 333.1227 |
| GGMSV    | 404.1962 | 432.1911 | GGMSVD   | 519.2232 | 547.2181 | GGMSVDI  | 632.3072 | 660.3021 |
| GM       | 161.0743 | 189.0692 | GMS      | 248.1063 | 276.1013 | GMSV     | 347.1748 | 375.1697 |
| GMSVD    | 462.2017 | 490.1966 | GMSVDI   | 575.2858 | 603.2807 | GMSVDID  | 690.3127 | 718.3076 |
| MS       | 191.0849 | 219.0798 | MSV      | 290.1533 | 318.1482 | MSVD     | 405.1802 | 433.1751 |
| MSVDI    | 518.2643 | 546.2592 | MSVDID   | 633.2912 | 661.2862 | SV       | 159.1128 | 187.1077 |
| SVD      | 274.1397 | 302.1347 | SVDI     | 387.2238 | 415.2187 | SVDID    | 502.2508 | 530.2457 |
| SVDIDA   | 573.2879 | 601.2828 | SVDIDAS  | 660.3199 | 688.3148 | VD       | 187.1077 | 215.1026 |
| VDI      | 300.1918 | 328.1867 | VDID     | 415.2187 | 443.2136 | VDIDA    | 486.2558 | 514.2508 |
| VDIDAS   | 573.2879 | 601.2828 | VDIDASG  | 630.3093 | 658.3042 | DI       | 201.1234 | 229.1183 |
| DID      | 316.1503 | 344.1452 | DIDA     | 387.1874 | 415.1823 | DIDAS    | 474.2195 | 502.2144 |
| DIDASG   | 531.2409 | 559.2358 | ID       | 201.1234 | 229.1183 | IDA      | 272.1605 | 300.1554 |
| IDAS     | 359.1925 | 387.1874 | IDASG    | 416.2140 | 444.2089 | DA       | 159.0764 | 187.0713 |
| DAS      | 246.1084 | 274.1034 | DASG     | 303.1299 | 331.1248 | AS       | 131.0815 | 159.0764 |
| ASG      | 188.1030 | 216.0979 | SG       | 117.0659 | 145.0608 |          |          |          |

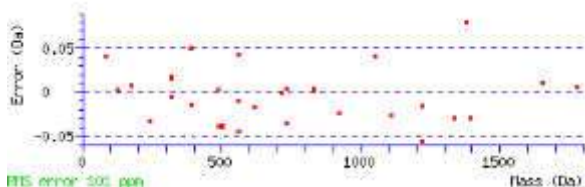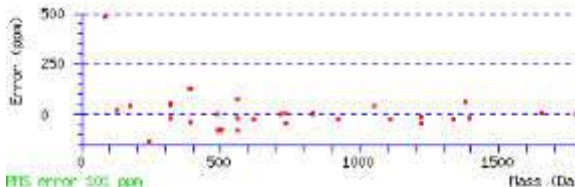

NCBI BLAST search of [TDKPYGIGGGMSVDIDASGR](#)  
 (Parameters: blastp, nr protein database, expect=20000, no filter, PAM30)  
 Other BLAST [web gateways](#)

All matches to this query

| Score | Mr(calc)  | Delta   | Sequence                             |
|-------|-----------|---------|--------------------------------------|
| 123.8 | 1994.9368 | -0.0033 | <a href="#">TDKPYGIGGGMSVDIDASGR</a> |
| 14.8  | 1994.8826 | 0.0508  | <a href="#">MGCASASWIEAVVDEASGR</a>  |
| 14.6  | 1994.8795 | 0.0539  | <a href="#">GHGMCGMNTMVS AVVTSTR</a> |
| 13.2  | 1995.0115 | -0.0781 | <a href="#">RNTWVVFVFGNIGWSQK</a>    |
| 12.9  | 1994.9983 | -0.0649 | <a href="#">DTMLANVAATSEFLDR</a>     |
| 12.1  | 1994.9553 | -0.0219 | <a href="#">TNMAAEDVEFLEMLRR</a>     |
| 11.4  | 1994.9078 | 0.0257  | <a href="#">VASCDIPIYMDEGSSVR</a>    |
| 11.1  | 1994.9302 | 0.0032  | <a href="#">CPPHLNPSSSSCISSPIR</a>   |
| 10.9  | 1995.0637 | -0.1302 | <a href="#">EILSGIAVPGLNVVDENTR</a>  |
| 10.7  | 1995.0762 | -0.1428 | <a href="#">ISITAPLHASPHRPAGAGSR</a> |

Mascot: <http://www.matrixscience.com/>

**MATRIX SCIENCE Mascot Search Results**

**Peptide View Spot no 2**

MS/MS Fragmentation of **TDKPYGIGGGMSVDIDASGRK**

Found in **gi|1835731** in **NCBI nr**, photosystem II 10 kDa polypeptide [Oryza sativa Indica Group]

Match to Query 179: 2123.028324 from(2124.035600,1+) intensity(0.0000) index(29)

Title: Label: K5, Spot\_Id: 219748, Peak\_List\_Id: 225867, MSMS Job\_Run\_Id: 21792, Comment:

Data file C:\Documents and Settings\Administrator\Desktop\farah BHU\spot set plate\Farah-Garima 11May 2013\ppw\_K5\_136842223800.txt

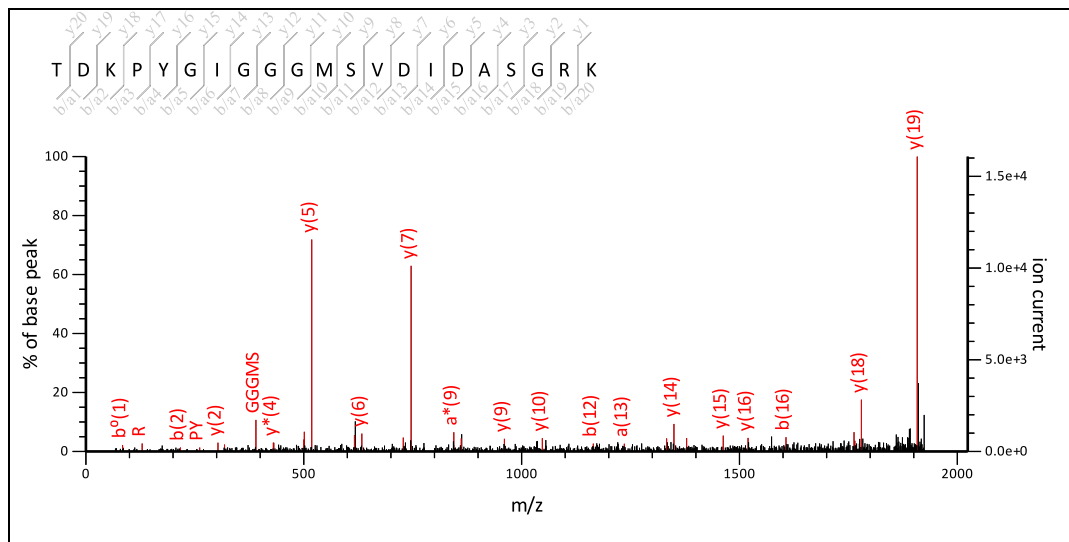

Navigation icons: Home, Back, Forward, Search, Print, Refresh. Search range: 0 to 2023.87.

Label all possible matches  Label matches used for scoring

Monoisotopic mass of neutral peptide Mr(calc): 2123.0317  
 Fixed modifications: Carbamidomethyl (C) (apply to specified residues or termini only)  
 Ions Score: 79 Expect: 1.9e-05  
 Matches : 43/424 fragment ions using 57 most intense peaks (help)

| #  | Immon.   | a         | a*        | a <sup>0</sup> | b         | b*        | b <sup>0</sup> | d         | d'        | Seq. | v         | w         | w'        | y         | y*        |
|----|----------|-----------|-----------|----------------|-----------|-----------|----------------|-----------|-----------|------|-----------|-----------|-----------|-----------|-----------|
| 1  | 74.0600  | 74.0600   |           | 56.0495        | 102.0550  |           | 84.0444        | 44.0495   |           | T    |           |           |           |           |           |
| 2  | 88.0393  | 189.0870  |           | 171.0764       | 217.0819  |           | 199.0713       | 145.0972  |           | D    | 1962.9702 | 1961.9749 |           | 2022.9913 | 2005.9648 |
| 3  | 101.1073 | 317.1819  | 300.1554  | 299.1714       | 345.1769  | 328.1503  | 327.1663       | 260.1241  |           | K    | 1834.8752 | 1833.8800 |           | 1907.9644 | 1890.9378 |
| 4  | 70.0651  | 414.2347  | 397.2082  | 396.2241       | 442.2296  | 425.2031  | 424.2191       | 388.2191  |           | P    | 1737.8225 | 1736.8272 |           | 1779.8694 | 1762.8429 |
| 5  | 136.0757 | 577.2980  | 560.2715  | 559.2875       | 605.2930  | 588.2664  | 587.2824       |           |           | Y    | 1574.7591 |           |           | 1682.8166 | 1665.7901 |
| 6  | 30.0338  | 634.3195  | 617.2930  | 616.3089       | 662.3144  | 645.2879  | 644.3039       |           |           | G    |           |           |           | 1519.7533 | 1502.7268 |
| 7  | 86.0964  | 747.4036  | 730.3770  | 729.3930       | 775.3985  | 758.3719  | 757.3879       | 719.3723  | 733.3879  | I    | 1404.6536 | 1417.6740 | 1431.6897 | 1462.7319 | 1445.7053 |
| 8  | 30.0338  | 804.4250  | 787.3985  | 786.4145       | 832.4199  | 815.3934  | 814.4094       |           |           | G    |           |           |           | 1349.6478 | 1332.6212 |
| 9  | 30.0338  | 861.4465  | 844.4199  | 843.4359       | 889.4414  | 872.4149  | 871.4308       |           |           | G    |           |           |           | 1292.6263 | 1275.5998 |
| 10 | 30.0338  | 918.4680  | 901.4414  | 900.4574       | 946.4629  | 929.4363  | 928.4523       |           |           | G    |           |           |           | 1235.6049 | 1218.5783 |
| 11 | 104.0528 | 1049.5084 | 1032.4819 | 1031.4979      | 1077.5034 | 1060.4768 | 1059.4928      | 989.5051  |           | M    | 1102.5487 | 1101.5535 |           | 1178.5834 | 1161.5568 |
| 12 | 60.0444  | 1136.5405 | 1119.5139 | 1118.5299      | 1164.5354 | 1147.5088 | 1146.5248      | 1120.5456 |           | S    | 1015.5167 | 1014.5215 |           | 1047.5429 | 1030.5164 |
| 13 | 72.0808  | 1235.6089 | 1218.5823 | 1217.5983      | 1263.6038 | 1246.5773 | 1245.5932      | 1221.5932 |           | V    | 916.4483  | 929.4687  |           | 960.5109  | 943.4843  |
| 14 | 88.0393  | 1350.6358 | 1333.6093 | 1332.6253      | 1378.6307 | 1361.6042 | 1360.6202      | 1306.6460 |           | D    | 801.4213  | 800.4261  |           | 861.4425  | 844.4159  |
| 15 | 86.0964  | 1463.7199 | 1446.6933 | 1445.7093      | 1491.7148 | 1474.6883 | 1473.7042      | 1435.6886 | 1449.7042 | I    | 688.3373  | 701.3577  | 715.3733  | 746.4155  | 729.3890  |
| 16 | 88.0393  | 1578.7468 | 1561.7203 | 1560.7363      | 1606.7418 | 1589.7152 | 1588.7312      | 1534.7570 |           | D    | 573.3103  | 572.3151  |           | 633.3315  | 616.3049  |
| 17 | 44.0495  | 1649.7840 | 1632.7574 | 1631.7734      | 1677.7789 | 1660.7523 | 1659.7683      |           |           | A    | 502.2732  |           |           | 518.3045  | 501.2780  |
| 18 | 60.0444  | 1736.8160 | 1719.7894 | 1718.8054      | 1764.8109 | 1747.7843 | 1746.8003      | 1720.8211 |           | S    | 415.2412  | 414.2459  |           | 447.2674  | 430.2409  |
| 19 | 30.0338  | 1793.8374 | 1776.8109 | 1775.8269      | 1821.8324 | 1804.8058 | 1803.8218      |           |           | G    |           |           |           | 360.2354  | 343.2088  |
| 20 | 129.1135 | 1949.9386 | 1932.9120 | 1931.9280      | 1977.9335 | 1960.9069 | 1959.9229      | 1864.8746 |           | R    | 202.1186  | 201.1234  |           | 303.2139  | 286.1874  |
| 21 | 101.1073 |           |           |                |           |           |                |           |           | K    | 74.0237   | 73.0284   |           | 147.1128  | 130.0863  |

| Seq | ya | yb | Seq | ya | yb | Seq | ya | yb |
|-----|----|----|-----|----|----|-----|----|----|
|     |    |    |     |    |    |     |    |    |

|          |          |          |          |          |          |          |          |          |
|----------|----------|----------|----------|----------|----------|----------|----------|----------|
| DK       | 216.1343 | 244.1292 | DKP      | 313.1870 | 341.1819 | DKPY     | 476.2504 | 504.2453 |
| DKPYG    | 533.2718 | 561.2667 | DKPYGI   | 646.3559 | 674.3508 | KP       | 198.1601 | 226.1550 |
| KPY      | 361.2234 | 389.2183 | KPYG     | 418.2449 | 446.2398 | KPYGI    | 531.3289 | 559.3239 |
| KPYGIG   | 588.3504 | 616.3453 | KPYGIGG  | 645.3719 | 673.3668 | PY       | 233.1285 | 261.1234 |
| PYG      | 290.1499 | 318.1448 | PYGI     | 403.2340 | 431.2289 | PYGIG    | 460.2554 | 488.2504 |
| PYGIGG   | 517.2769 | 545.2718 | PYGIGGG  | 574.2984 | 602.2933 | YG       | 193.0972 | 221.0921 |
| YGI      | 306.1812 | 334.1761 | YGIG     | 363.2027 | 391.1976 | YGIGG    | 420.2241 | 448.2191 |
| YGIGGG   | 477.2456 | 505.2405 | YGIGGGM  | 608.2861 | 636.2810 | YGIGGGMS | 695.3181 | 723.3130 |
| GI       | 143.1179 | 171.1128 | GIG      | 200.1394 | 228.1343 | GIGG     | 257.1608 | 285.1557 |
| GIGGG    | 314.1823 | 342.1772 | GIGGGM   | 445.2228 | 473.2177 | GIGGGMS  | 532.2548 | 560.2497 |
| GIGGGMSV | 631.3232 | 659.3181 | IG       | 143.1179 | 171.1128 | IGG      | 200.1394 | 228.1343 |
| IGGG     | 257.1608 | 285.1557 | IGGGM    | 388.2013 | 416.1962 | IGGGMS   | 475.2333 | 503.2282 |
| IGGGMSV  | 574.3017 | 602.2967 | IGGGMSVD | 689.3287 | 717.3236 | GG       | 87.0553  | 115.0502 |
| GGG      | 144.0768 | 172.0717 | GGGM     | 275.1172 | 303.1122 | GGGMS    | 362.1493 | 390.1442 |
| GGGMSV   | 461.2177 | 489.2126 | GGGMSVD  | 576.2446 | 604.2395 | GGGMSVDI | 689.3287 | 717.3236 |
| GG       | 87.0553  | 115.0502 | GGM      | 218.0958 | 246.0907 | GGMS     | 305.1278 | 333.1227 |
| GGMSV    | 404.1962 | 432.1911 | GGMSVD   | 519.2232 | 547.2181 | GGMSVDI  | 632.3072 | 660.3021 |
| GM       | 161.0743 | 189.0692 | GMS      | 248.1063 | 276.1013 | GMSV     | 347.1748 | 375.1697 |
| GMSVD    | 462.2017 | 490.1966 | GMSVDI   | 575.2858 | 603.2807 | GMSVDID  | 690.3127 | 718.3076 |
| MS       | 191.0849 | 219.0798 | MSV      | 290.1533 | 318.1482 | MSVD     | 405.1802 | 433.1751 |
| MSVDI    | 518.2643 | 546.2592 | MSVDID   | 633.2912 | 661.2862 | SV       | 159.1128 | 187.1077 |
| SVD      | 274.1397 | 302.1347 | SVDI     | 387.2238 | 415.2187 | SVDID    | 502.2508 | 530.2457 |
| SVDIDA   | 573.2879 | 601.2828 | SVDIDAS  | 660.3199 | 688.3148 | VD       | 187.1077 | 215.1026 |
| VDI      | 300.1918 | 328.1867 | VDID     | 415.2187 | 443.2136 | VDIDA    | 486.2558 | 514.2508 |
| VDIDAS   | 573.2879 | 601.2828 | VDIDASG  | 630.3093 | 658.3042 | DI       | 201.1234 | 229.1183 |
| DID      | 316.1503 | 344.1452 | DIDA     | 387.1874 | 415.1823 | DIDAS    | 474.2195 | 502.2144 |
| DIDASG   | 531.2409 | 559.2358 | DIDASGR  | 687.3420 | 715.3369 | ID       | 201.1234 | 229.1183 |
| IDA      | 272.1605 | 300.1554 | IDAS     | 359.1925 | 387.1874 | IDASG    | 416.2140 | 444.2089 |
| IDASGR   | 572.3151 | 600.3100 | DA       | 159.0764 | 187.0713 | DAS      | 246.1084 | 274.1034 |
| DASG     | 303.1299 | 331.1248 | DASGR    | 459.2310 | 487.2259 | AS       | 131.0815 | 159.0764 |
| ASG      | 188.1030 | 216.0979 | ASGR     | 344.2041 | 372.1990 | SG       | 117.0659 | 145.0608 |
| SGR      | 273.1670 | 301.1619 | GR       | 186.1349 | 214.1299 |          |          |          |

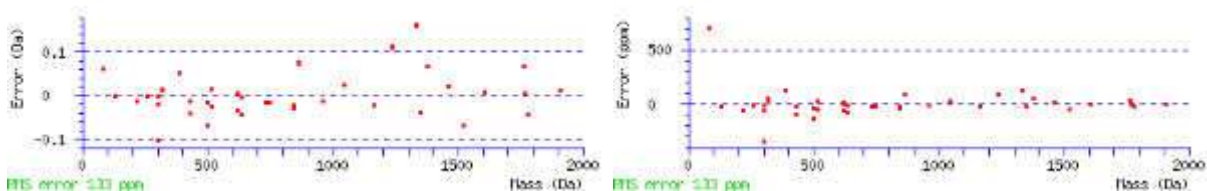

NCBI BLAST search of [TDKPYGIGGGMSVDIDASGRK](#)  
 (Parameters: blastp, nr protein database, expect=20000, no filter, PAM30)  
 Other BLAST [web gateways](#)

All matches to this query

| Score | Mr(calc)  | Delta   | Sequence                              |
|-------|-----------|---------|---------------------------------------|
| 78.7  | 2123.0317 | -0.0034 | <a href="#">TDKPYGIGGGMSVDIDASGRK</a> |
| 17.4  | 2123.0504 | -0.0220 | <a href="#">TFNMGVGMVLVNOEVSOR</a>    |
| 14.7  | 2122.9953 | 0.0330  | <a href="#">MVEVNADGKIYAAEGAADAGR</a> |
| 13.3  | 2122.9841 | 0.0442  | <a href="#">TMEISINDYPLTNPDTSGR</a>   |
| 12.7  | 2122.9511 | 0.0773  | <a href="#">LNEMAEVQSAMELGDDTVR</a>   |
| 12.7  | 2122.9511 | 0.0773  | <a href="#">LNEMAEVQSAMELGDDTVR</a>   |
| 12.6  | 2123.0205 | 0.0078  | <a href="#">GLSSPSMDEGALFATPSTSIR</a> |
| 12.0  | 2123.0019 | 0.0265  | <a href="#">SVEDDSIPSFSGGIDSLRK</a>   |
| 11.7  | 2123.0429 | -0.0146 | <a href="#">ISYNLAMANVDEIROSQR</a>    |
| 11.2  | 2123.1627 | -0.1343 | <a href="#">SLTGFVGLIASLVFLDOSTR</a>  |





**MATRIX SCIENCE Mascot Search Results**

**Peptide View Spot no 2**

MS/MS Fragmentation of **TDKPYGGGGMSVDIDASGR**

Found in **gi1835731** in **NCBI nr**, photosystem II 10 kDa polypeptide [Oryza sativa Indica Group]

Match to Query 177: 2010.909624 from(2011.916900,1+) intensity(0.0000) index(28)

Title: Label: K5, Spot\_Id: 219748, Peak\_List\_Id: 225866, MSMS Job\_Run\_Id: 21792, Comment:

Data file C:\Documents and Settings\Administrator\Desktop\farah BHU\spot set plate\Farah-Garima 11May 2013\ppw\_K5\_136842223800.txt

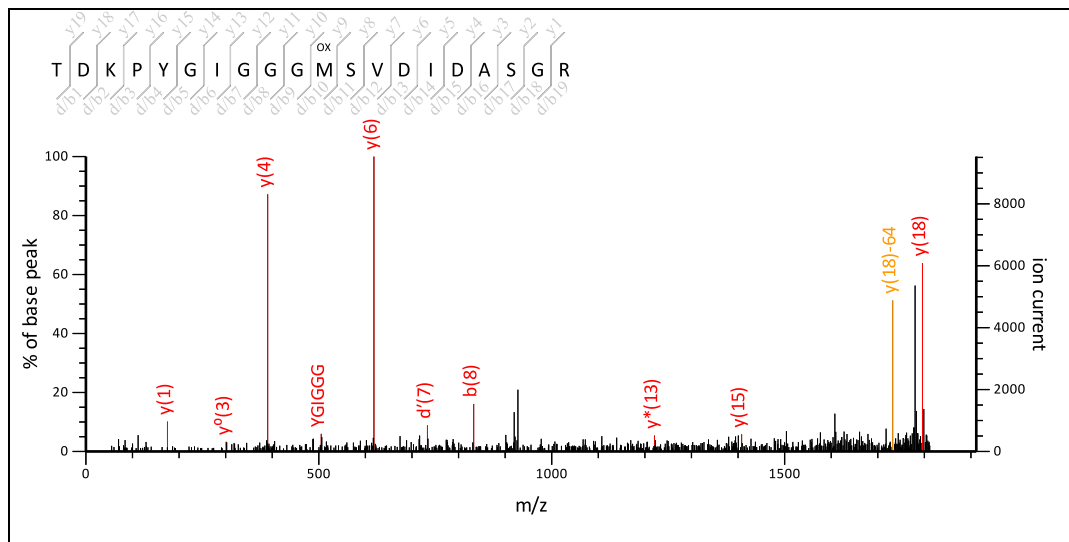

Navigation icons: Home, Back, Forward, Search, Print, Refresh. Search range: 0 to 1911.46

Label all possible matches  Label matches used for scoring

Monoisotopic mass of neutral peptide Mr(calc): 2010.9317

Fixed modifications: Carbamidomethyl (C) (apply to specified residues or termini only)

Variable modifications:

M11 : Oxidation (M), with neutral losses 0.0000 (shown in table), 63.9983

Ions Score: 49 Expect: 0.017

Matches : 16/551 fragment ions using 18 most intense peaks (help)

| #  | Immon.   | a         | a*        | a <sup>0</sup> | b         | b*        | b <sup>0</sup> | d         | d'        | Seq. | v         | w         | w'        | y         | y*        |
|----|----------|-----------|-----------|----------------|-----------|-----------|----------------|-----------|-----------|------|-----------|-----------|-----------|-----------|-----------|
| 1  | 74.0600  | 74.0600   |           | 56.0495        | 102.0550  |           | 84.0444        | 44.0495   |           | T    |           |           |           |           |           |
| 2  | 88.0393  | 189.0870  |           | 171.0764       | 217.0819  |           | 199.0713       | 145.0972  |           | D    | 1850.8701 | 1849.8749 |           | 1910.8913 | 1893.8647 |
| 3  | 101.1073 | 317.1819  | 300.1554  | 299.1714       | 345.1769  | 328.1503  | 327.1663       | 260.1241  |           | K    | 1722.7752 | 1721.7799 |           | 1795.8643 | 1778.8378 |
| 4  | 70.0651  | 414.2347  | 397.2082  | 396.2241       | 442.2296  | 425.2031  | 424.2191       | 388.2191  |           | P    | 1625.7224 | 1624.7272 |           | 1667.7694 | 1650.7428 |
| 5  | 136.0757 | 577.2980  | 560.2715  | 559.2875       | 605.2930  | 588.2664  | 587.2824       |           |           | Y    | 1462.6591 |           |           | 1570.7166 | 1553.6901 |
| 6  | 30.0338  | 634.3195  | 617.2930  | 616.3089       | 662.3144  | 645.2879  | 644.3039       |           |           | G    |           |           |           | 1407.6533 | 1390.6267 |
| 7  | 86.0964  | 747.4036  | 730.3770  | 729.3930       | 775.3985  | 758.3719  | 757.3879       | 719.3723  | 733.3879  | I    | 1292.5536 | 1305.5740 | 1319.5896 | 1350.6318 | 1333.6053 |
| 8  | 30.0338  | 804.4250  | 787.3985  | 786.4145       | 832.4199  | 815.3934  | 814.4094       |           |           | G    |           |           |           | 1237.5477 | 1220.5212 |
| 9  | 30.0338  | 861.4465  | 844.4199  | 843.4359       | 889.4414  | 872.4149  | 871.4308       |           |           | G    |           |           |           | 1180.5263 | 1163.4997 |
| 10 | 30.0338  | 918.4680  | 901.4414  | 900.4574       | 946.4629  | 929.4363  | 928.4523       |           |           | G    |           |           |           | 1123.5048 | 1106.4783 |
| 11 | 120.0478 | 1065.5034 | 1048.4768 | 1047.4928      | 1093.4983 | 1076.4717 | 1075.4877      | 989.5051  |           | M    | 974.4538  | 973.4585  |           | 1066.4834 | 1049.4568 |
| 12 | 60.0444  | 1152.5354 | 1135.5088 | 1134.5248      | 1180.5303 | 1163.5038 | 1162.5197      | 1136.5405 |           | S    | 887.4217  | 886.4265  |           | 919.4480  | 902.4214  |
| 13 | 72.0808  | 1251.6038 | 1234.5773 | 1233.5932      | 1279.5987 | 1262.5722 | 1261.5882      | 1237.5882 |           | V    | 788.3533  | 801.3737  |           | 832.4159  | 815.3894  |
| 14 | 88.0393  | 1366.6307 | 1349.6042 | 1348.6202      | 1394.6257 | 1377.5991 | 1376.6151      | 1322.6409 |           | D    | 673.3264  | 672.3311  |           | 733.3475  | 716.3210  |
| 15 | 86.0964  | 1479.7148 | 1462.6883 | 1461.7042      | 1507.7097 | 1490.6832 | 1489.6992      | 1451.6835 | 1465.6992 | I    | 560.2423  | 573.2627  | 587.2784  | 618.3206  | 601.2940  |
| 16 | 88.0393  | 1594.7418 | 1577.7152 | 1576.7312      | 1622.7367 | 1605.7101 | 1604.7261      | 1550.7519 |           | D    | 445.2154  | 444.2201  |           | 505.2365  | 488.2100  |
| 17 | 44.0495  | 1665.7789 | 1648.7523 | 1647.7683      | 1693.7738 | 1676.7472 | 1675.7632      |           |           | A    | 374.1783  |           |           | 390.2096  | 373.1830  |
| 18 | 60.0444  | 1752.8109 | 1735.7843 | 1734.8003      | 1780.8058 | 1763.7793 | 1762.7952      | 1736.8160 |           | S    | 287.1462  | 286.1510  |           | 319.1724  | 302.1459  |
| 19 | 30.0338  | 1809.8324 | 1792.8058 | 1791.8218      | 1837.8273 | 1820.8007 | 1819.8167      |           |           | G    |           |           |           | 232.1404  | 215.1139  |
| 20 | 129.1135 |           |           |                |           |           |                |           |           | R    | 74.0237   | 73.0284   |           | 175.1190  | 158.0924  |



| Seq     | ya       | yb       | Seq     | ya       | yb       | Seq      | ya       | yb       |
|---------|----------|----------|---------|----------|----------|----------|----------|----------|
| DK      | 216.1343 | 244.1292 | DKP     | 313.1870 | 341.1819 | DKPY     | 476.2504 | 504.2453 |
| DKPYG   | 533.2718 | 561.2667 | DKPYGI  | 646.3559 | 674.3508 | KP       | 198.1601 | 226.1550 |
| KPY     | 361.2234 | 389.2183 | KPYG    | 418.2449 | 446.2398 | KPYGI    | 531.3289 | 559.3239 |
| KPYGIG  | 588.3504 | 616.3453 | KPYGIGG | 645.3719 | 673.3668 | PY       | 233.1285 | 261.1234 |
| PYG     | 290.1499 | 318.1448 | PYGI    | 403.2340 | 431.2289 | PYGIG    | 460.2554 | 488.2504 |
| PYGIGG  | 517.2769 | 545.2718 | PYGIGGG | 574.2984 | 602.2933 | YG       | 193.0972 | 221.0921 |
| YGI     | 306.1812 | 334.1761 | YGIG    | 363.2027 | 391.1976 | YGIGG    | 420.2241 | 448.2191 |
| YGIGGG  | 477.2456 | 505.2405 | YGIGGGM | 624.2810 | 652.2759 | GI       | 143.1179 | 171.1128 |
| GIG     | 200.1394 | 228.1343 | GIGG    | 257.1608 | 285.1557 | GIGGG    | 314.1823 | 342.1772 |
| GIGGGM  | 461.2177 | 489.2126 | GIGGGMS | 548.2497 | 576.2446 | GIGGGMSV | 647.3181 | 675.3130 |
| IG      | 143.1179 | 171.1128 | IGG     | 200.1394 | 228.1343 | IGGG     | 257.1608 | 285.1557 |
| IGGGM   | 404.1962 | 432.1911 | IGGMS   | 491.2282 | 519.2232 | IGGMSV   | 590.2967 | 618.2916 |
| GG      | 87.0553  | 115.0502 | GGG     | 144.0768 | 172.0717 | GGGM     | 291.1122 | 319.1071 |
| GGGMS   | 378.1442 | 406.1391 | GGGMSV  | 477.2126 | 505.2075 | GGGMSVD  | 592.2395 | 620.2345 |
| GG      | 87.0553  | 115.0502 | GGM     | 234.0907 | 262.0856 | GGMS     | 321.1227 | 349.1176 |
| GGMSV   | 420.1911 | 448.1860 | GGMSVD  | 535.2181 | 563.2130 | GGMSVDI  | 648.3021 | 676.2971 |
| GM      | 177.0692 | 205.0641 | GMS     | 264.1013 | 292.0962 | GMSV     | 363.1697 | 391.1646 |
| GMSVD   | 478.1966 | 506.1915 | GMSVDI  | 591.2807 | 619.2756 | MS       | 207.0798 | 235.0747 |
| MSV     | 306.1482 | 334.1431 | MSVD    | 421.1751 | 449.1701 | MSVDI    | 534.2592 | 562.2541 |
| MSVDID  | 649.2862 | 677.2811 | SV      | 159.1128 | 187.1077 | SVD      | 274.1397 | 302.1347 |
| SVDI    | 387.2238 | 415.2187 | SVDID   | 502.2508 | 530.2457 | SVDIDA   | 573.2879 | 601.2828 |
| SVDIDAS | 660.3199 | 688.3148 | VD      | 187.1077 | 215.1026 | VDI      | 300.1918 | 328.1867 |
| VDID    | 415.2187 | 443.2136 | VDIDA   | 486.2558 | 514.2508 | VDIDAS   | 573.2879 | 601.2828 |
| VDIDASG | 630.3093 | 658.3042 | DI      | 201.1234 | 229.1183 | DID      | 316.1503 | 344.1452 |
| DIDA    | 387.1874 | 415.1823 | DIDAS   | 474.2195 | 502.2144 | DIDASG   | 531.2409 | 559.2358 |
| ID      | 201.1234 | 229.1183 | IDA     | 272.1605 | 300.1554 | IDAS     | 359.1925 | 387.1874 |
| IDASG   | 416.2140 | 444.2089 | DA      | 159.0764 | 187.0713 | DAS      | 246.1084 | 274.1034 |
| DASG    | 303.1299 | 331.1248 | AS      | 131.0815 | 159.0764 | ASG      | 188.1030 | 216.0979 |
| SG      | 117.0659 | 145.0608 |         |          |          |          |          |          |

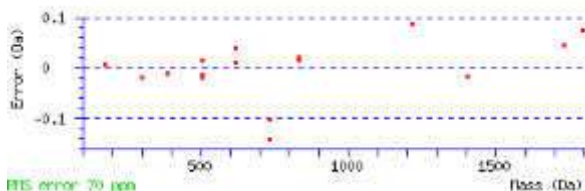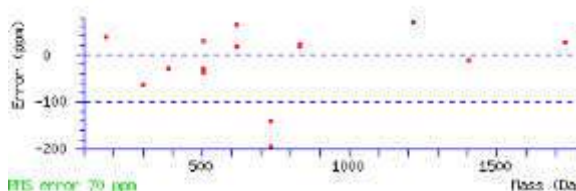

NCBI BLAST search of [TDKPYGIGGGMSVDIDASGR](#)  
 (Parameters: blastp, nr protein database, expect=20000, no filter, PAM30)  
 Other BLAST [web gateways](#)

All matches to this query

| Score | Mr(calc)  | Delta   | Sequence                              |
|-------|-----------|---------|---------------------------------------|
| 49.2  | 2010.9317 | -0.0221 | <a href="#">TDKPYGIGGGMSVDIDASGR</a>  |
| 11.0  | 2010.8614 | 0.0482  | <a href="#">SEATSSIGAESDDGSSAPTSR</a> |
| 10.1  | 2010.9342 | -0.0245 | <a href="#">ESSSTIDVSDSDNVVSSKR</a>   |
| 9.9   | 2010.9027 | 0.0069  | <a href="#">VASCDIPIPYMDEGSSVR</a>    |
| 8.1   | 2010.8371 | 0.0725  | <a href="#">SDSSNNECVLOCVEGASR</a>    |
| 8.1   | 2010.9763 | -0.0667 | <a href="#">MILMPCYLQLDLGLCR</a>      |
| 8.1   | 2010.9763 | -0.0667 | <a href="#">MILMPCYLQLDLGLCR</a>      |
| 8.0   | 2010.8991 | 0.0105  | <a href="#">TDNNSVRSGYNADNVTER</a>    |
| 7.6   | 2010.8614 | 0.0482  | <a href="#">ESSATTVSPDSENDTTNTR</a>   |
| 6.9   | 2011.0011 | -0.0915 | <a href="#">SOPYGISTNGVVGSLFETR</a>   |

**MATRIX SCIENCE Mascot Search Results**

**Peptide View Spot no 2**

MS/MS Fragmentation of **TDKPYGGGGMSVDIDASGRK**

Found in **gi|1835731** in **NCBI nr**, photosystem II 10 kDa polypeptide [Oryza sativa Indica Group]

Match to Query 181: 2139.007324 from(2140.014600,1+) intensity(0.0000) index(30)

Title: Label: K5, Spot\_Id: 219748, Peak\_List\_Id: 225869, MSMS Job\_Run\_Id: 21792, Comment:

Data file C:\Documents and Settings\Administrator\Desktop\farah BHU\spot set plate\Farah-Garima 11May 2013\ppw\_K5\_136842223800.txt

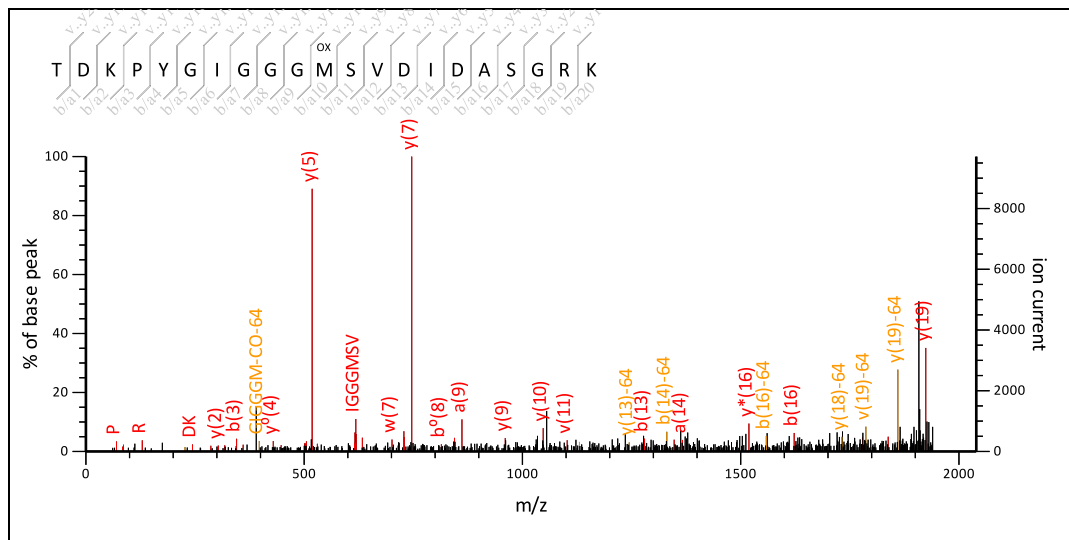

Navigation icons: Home, Back, Forward, Search, etc. Range: 0 to 2039.73

Label all possible matches  Label matches used for scoring

Monoisotopic mass of neutral peptide Mr(calc): 2139.0266  
 Fixed modifications: Carbamidomethyl (C) (apply to specified residues or termini only)  
 Variable modifications:  
 M11 : Oxidation (M), with neutral losses 63.9983(shown in table), 0.0000  
 Ions Score: 44 Expect: 0.05  
 Matches : 64/609 fragment ions using 112 most intense peaks (help)

| #  | Immon.   | a         | a*        | a <sup>0</sup> | b         | b*        | b <sup>0</sup> | d         | d'        | Seq. | v         | w         | w'        | y         | y*        |
|----|----------|-----------|-----------|----------------|-----------|-----------|----------------|-----------|-----------|------|-----------|-----------|-----------|-----------|-----------|
| 1  | 74.0600  | 74.0600   |           | 56.0495        | 102.0550  |           | 84.0444        | 44.0495   |           | T    |           |           |           |           |           |
| 2  | 88.0393  | 189.0870  |           | 171.0764       | 217.0819  |           | 199.0713       | 145.0972  |           | D    | 1914.9668 | 1913.9716 |           | 1974.9879 | 1957.9614 |
| 3  | 101.1073 | 317.1819  | 300.1554  | 299.1714       | 345.1769  | 328.1503  | 327.1663       | 260.1241  |           | K    | 1786.8719 | 1785.8766 |           | 1859.9610 | 1842.9345 |
| 4  | 70.0651  | 414.2347  | 397.2082  | 396.2241       | 442.2296  | 425.2031  | 424.2191       | 388.2191  |           | P    | 1689.8191 | 1688.8238 |           | 1731.8660 | 1714.8395 |
| 5  | 136.0757 | 577.2980  | 560.2715  | 559.2875       | 605.2930  | 588.2664  | 587.2824       |           |           | Y    | 1526.7558 |           |           | 1634.8133 | 1617.7867 |
| 6  | 30.0338  | 634.3195  | 617.2930  | 616.3089       | 662.3144  | 645.2879  | 644.3039       |           |           | G    |           |           |           | 1471.7499 | 1454.7234 |
| 7  | 86.0964  | 747.4036  | 730.3770  | 729.3930       | 775.3985  | 758.3719  | 757.3879       | 719.3723  | 733.3879  | I    | 1356.6502 | 1369.6706 | 1383.6863 | 1414.7285 | 1397.7019 |
| 8  | 30.0338  | 804.4250  | 787.3985  | 786.4145       | 832.4199  | 815.3934  | 814.4094       |           |           | G    |           |           |           | 1301.6444 | 1284.6179 |
| 9  | 30.0338  | 861.4465  | 844.4199  | 843.4359       | 889.4414  | 872.4149  | 871.4308       |           |           | G    |           |           |           | 1244.6230 | 1227.5964 |
| 10 | 30.0338  | 918.4680  | 901.4414  | 900.4574       | 946.4629  | 929.4363  | 928.4523       |           |           | G    |           |           |           | 1187.6015 | 1170.5749 |
| 11 | 56.0495  | 1001.5051 | 984.4785  | 983.4945       | 1029.5000 | 1012.4734 | 1011.4894      | 989.5051  |           | M    | 1102.5487 | 1101.5535 |           | 1130.5800 | 1113.5535 |
| 12 | 60.0444  | 1088.5371 | 1071.5106 | 1070.5265      | 1116.5320 | 1099.5055 | 1098.5215      | 1072.5422 |           | S    | 1015.5167 | 1014.5215 |           | 1047.5429 | 1030.5164 |
| 13 | 72.0808  | 1187.6055 | 1170.5790 | 1169.5950      | 1215.6004 | 1198.5739 | 1197.5899      | 1173.5899 |           | V    | 916.4483  | 929.4687  |           | 960.5109  | 943.4843  |
| 14 | 88.0393  | 1302.6325 | 1285.6059 | 1284.6219      | 1330.6274 | 1313.6008 | 1312.6168      | 1258.6426 |           | D    | 801.4213  | 800.4261  |           | 861.4425  | 844.4159  |
| 15 | 86.0964  | 1415.7165 | 1398.6900 | 1397.7060      | 1443.7114 | 1426.6849 | 1425.7009      | 1387.6852 | 1401.7009 | I    | 688.3373  | 701.3577  | 715.3733  | 746.4155  | 729.3890  |
| 16 | 88.0393  | 1530.7435 | 1513.7169 | 1512.7329      | 1558.7384 | 1541.7118 | 1540.7278      | 1486.7536 |           | D    | 573.3103  | 572.3151  |           | 633.3315  | 616.3049  |
| 17 | 44.0495  | 1601.7806 | 1584.7540 | 1583.7700      | 1629.7755 | 1612.7489 | 1611.7649      |           |           | A    | 502.2732  |           |           | 518.3045  | 501.2780  |
| 18 | 60.0444  | 1688.8126 | 1671.7861 | 1670.8020      | 1716.8075 | 1699.7810 | 1698.7970      | 1672.8177 |           | S    | 415.2412  | 414.2459  |           | 447.2674  | 430.2409  |
| 19 | 30.0338  | 1745.8341 | 1728.8075 | 1727.8235      | 1773.8290 | 1756.8024 | 1755.8184      |           |           | G    |           |           |           | 360.2354  | 343.2088  |
| 20 | 129.1135 | 1901.9352 | 1884.9086 | 1883.9246      | 1929.9301 | 1912.9035 | 1911.9195      | 1816.8712 |           | R    | 202.1186  | 201.1234  |           | 303.2139  | 286.1874  |

|    |          |  |  |  |  |  |  |  |  |  |  |   |         |         |  |          |          |
|----|----------|--|--|--|--|--|--|--|--|--|--|---|---------|---------|--|----------|----------|
| 21 | 101.1073 |  |  |  |  |  |  |  |  |  |  | K | 74.0237 | 73.0284 |  | 147.1128 | 130.0863 |
|----|----------|--|--|--|--|--|--|--|--|--|--|---|---------|---------|--|----------|----------|

| Seq     | ya       | yb       | Seq      | ya       | yb       | Seq      | ya       | yb       |
|---------|----------|----------|----------|----------|----------|----------|----------|----------|
| DK      | 216.1343 | 244.1292 | DKP      | 313.1870 | 341.1819 | DKPY     | 476.2504 | 504.2453 |
| DKPYG   | 533.2718 | 561.2667 | DKPYGI   | 646.3559 | 674.3508 | KP       | 198.1601 | 226.1550 |
| KPY     | 361.2234 | 389.2183 | KPYG     | 418.2449 | 446.2398 | KPYGI    | 531.3289 | 559.3239 |
| KPYGIG  | 588.3504 | 616.3453 | KPYGIGG  | 645.3719 | 673.3668 | PY       | 233.1285 | 261.1234 |
| PYG     | 290.1499 | 318.1448 | PYGI     | 403.2340 | 431.2289 | PYGIG    | 460.2554 | 488.2504 |
| PYGIGG  | 517.2769 | 545.2718 | PYGIGGG  | 574.2984 | 602.2933 | PYGIGGGM | 657.3355 | 685.3304 |
| YG      | 193.0972 | 221.0921 | YGI      | 306.1812 | 334.1761 | YGIG     | 363.2027 | 391.1976 |
| YGIGG   | 420.2241 | 448.2191 | YGIGGG   | 477.2456 | 505.2405 | YGIGGGM  | 560.2827 | 588.2776 |
| YGIGGMS | 647.3148 | 675.3097 | GI       | 143.1179 | 171.1128 | GIG      | 200.1394 | 228.1343 |
| GIGG    | 257.1608 | 285.1557 | GIGGG    | 314.1823 | 342.1772 | GIGGGM   | 397.2194 | 425.2143 |
| GIGGMS  | 484.2514 | 512.2463 | GIGGMSV  | 583.3198 | 611.3148 | GIGGMSVD | 698.3468 | 726.3417 |
| IG      | 143.1179 | 171.1128 | IGG      | 200.1394 | 228.1343 | IGGG     | 257.1608 | 285.1557 |
| IGGGM   | 340.1979 | 368.1928 | IGGMS    | 427.2300 | 455.2249 | IGGMSV   | 526.2984 | 554.2933 |
| IGGMSVD | 641.3253 | 669.3202 | GG       | 87.0553  | 115.0502 | GGG      | 144.0768 | 172.0717 |
| GGGM    | 227.1139 | 255.1088 | GGMS     | 314.1459 | 342.1408 | GGMSV    | 413.2143 | 441.2092 |
| GGGMSVD | 528.2413 | 556.2362 | GGGMSVDI | 641.3253 | 669.3202 | GG       | 87.0553  | 115.0502 |
| GGM     | 170.0924 | 198.0873 | GGMS     | 257.1244 | 285.1193 | GGMSV    | 356.1928 | 384.1878 |
| GGMSVD  | 471.2198 | 499.2147 | GGMSVDI  | 584.3039 | 612.2988 | GGMSVDID | 699.3308 | 727.3257 |
| GM      | 113.0709 | 141.0659 | GMS      | 200.1030 | 228.0979 | GMSV     | 299.1714 | 327.1663 |
| GMSVD   | 414.1983 | 442.1932 | GMSVDI   | 527.2824 | 555.2773 | GMSVDID  | 642.3093 | 670.3042 |
| MS      | 143.0815 | 171.0764 | MSV      | 242.1499 | 270.1448 | MSVD     | 357.1769 | 385.1718 |
| MSVDI   | 470.2609 | 498.2558 | MSVDID   | 585.2879 | 613.2828 | MSVDIDA  | 656.3250 | 684.3199 |
| SV      | 159.1128 | 187.1077 | SVD      | 274.1397 | 302.1347 | SVDI     | 387.2238 | 415.2187 |
| SVDID   | 502.2508 | 530.2457 | SVDIDA   | 573.2879 | 601.2828 | SVDIDAS  | 660.3199 | 688.3148 |
| VD      | 187.1077 | 215.1026 | VDI      | 300.1918 | 328.1867 | VDID     | 415.2187 | 443.2136 |
| VDIDA   | 486.2558 | 514.2508 | VDIDAS   | 573.2879 | 601.2828 | VDIDASG  | 630.3093 | 658.3042 |
| DI      | 201.1234 | 229.1183 | DID      | 316.1503 | 344.1452 | DIDA     | 387.1874 | 415.1823 |
| DIDAS   | 474.2195 | 502.2144 | DIDASG   | 531.2409 | 559.2358 | DIDASGR  | 687.3420 | 715.3369 |
| ID      | 201.1234 | 229.1183 | IDA      | 272.1605 | 300.1554 | IDAS     | 359.1925 | 387.1874 |
| IDASG   | 416.2140 | 444.2089 | IDASGR   | 572.3151 | 600.3100 | DA       | 159.0764 | 187.0713 |
| DAS     | 246.1084 | 274.1034 | DASG     | 303.1299 | 331.1248 | DASGR    | 459.2310 | 487.2259 |
| AS      | 131.0815 | 159.0764 | ASG      | 188.1030 | 216.0979 | ASGR     | 344.2041 | 372.1990 |
| SG      | 117.0659 | 145.0608 | SGR      | 273.1670 | 301.1619 | GR       | 186.1349 | 214.1299 |

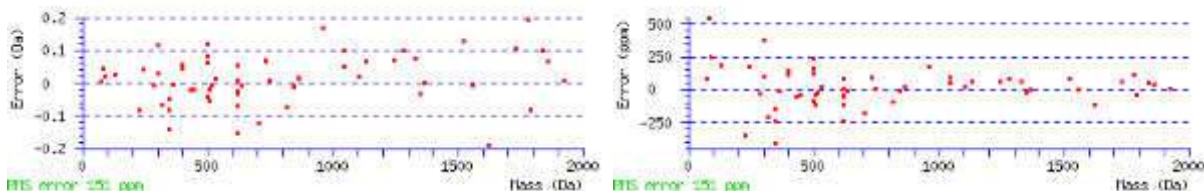

NCBI BLAST search of [TDKPYGIGGMSVDIDASGRK](#)  
 (Parameters: blastp, nr protein database, expect=20000, no filter, PAM30)  
 Other BLAST [web gateways](#)

All matches to this query

| Score | Mr(calc)  | Delta   | Sequence                              |
|-------|-----------|---------|---------------------------------------|
| 44.3  | 2139.0266 | -0.0193 | <a href="#">TDKPYGIGGMSVDIDASGRK</a>  |
| 11.5  | 2138.9976 | 0.0097  | <a href="#">AFGDALDSIPMMLAENSGLR</a>  |
| 9.4   | 2139.0354 | -0.0280 | <a href="#">DVNAWSTMITGFARNGMLR</a>   |
| 7.7   | 2138.9725 | 0.0348  | <a href="#">ITDPDDIMLNFARGECIR</a>    |
| 7.5   | 2139.0444 | -0.0370 | <a href="#">GVLEVNPDALAEADKADOER</a>  |
| 7.2   | 2138.9392 | 0.0681  | <a href="#">SSEVDVEYPSWLSNDQR</a>     |
| 6.9   | 2139.0300 | -0.0227 | <a href="#">NAMSTTVNDVMVGITSAGLSR</a> |

|     |           |         |                                        |
|-----|-----------|---------|----------------------------------------|
| 6.8 | 2139.0241 | -0.0168 | <a href="#">SRPESMAALMEGEWIGIGR</a>    |
| 6.7 | 2138.9539 | 0.0534  | <a href="#">TDTPYGTGGMALPDGKDASGR</a>  |
| 6.6 | 2139.0630 | -0.0557 | <a href="#">MASKAATPSSPSFILTSGASGR</a> |

Mascot: <http://www.matrixscience.com/>

**MATRIX SCIENCE Mascot Search Results**

**Peptide View Spot no 2**

MS/MS Fragmentation of **IKTDKPYGIGGGMSVDIDASGR**

Found in **gi|1835731** in **NCBI**nr, photosystem II 10 kDa polypeptide [Oryza sativa Indica Group]

Match to Query 185: 2236.110624 from(2237.117900,1+) intensity(0.0000) index(31)

Title: Label: K5, Spot\_Id: 219748, Peak\_List\_Id: 225862, MSMS Job\_Run\_Id: 21792, Comment:

Data file C:\Documents and Settings\Administrator\Desktop\farah BHU\spot set plate\Farah-Garima 11May 2013\ppw\_K5\_136842223800.txt

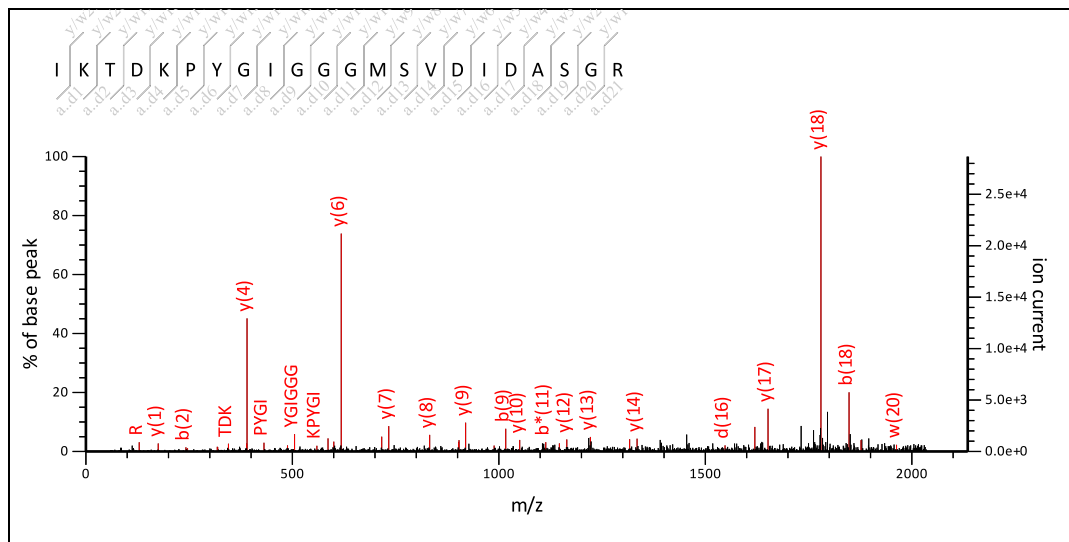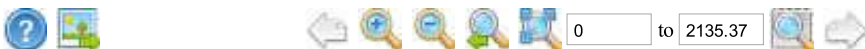

Label all possible matches  Label matches used for scoring

Monoisotopic mass of neutral peptide Mr(calc): 2236.1158

Fixed modifications: Carbamidomethyl (C) (apply to specified residues or termini only)

Ions Score: 92 Expect: 7.7e-07

Matches : 45/445 fragment ions using 60 most intense peaks [\(help\)](#)

| #  | Immon.          | a               | a*        | a <sup>0</sup> | b                | b*               | b <sup>0</sup> | d                | d'        | Seq. | v         | w                | w'        | y                | y*              |
|----|-----------------|-----------------|-----------|----------------|------------------|------------------|----------------|------------------|-----------|------|-----------|------------------|-----------|------------------|-----------------|
| 1  | 86.0964         | 86.0964         |           |                | 114.0913         |                  |                | 44.0495          |           | I    |           |                  |           |                  |                 |
| 2  | 101.1073        | 214.1914        | 197.1648  |                | <b>242.1863</b>  | 225.1598         |                | 157.1335         |           | K    | 2050.9498 | 2049.9546        |           | 2124.0390        | 2107.0124       |
| 3  | 74.0600         | 315.2391        | 298.2125  | 297.2285       | 343.2340         | 326.2074         | 325.2234       | 299.2442         | 301.2234  | T    | 1949.9022 | <b>1962.9226</b> | 1964.9018 | 1995.9440        | 1978.9175       |
| 4  | 88.0393         | 430.2660        | 413.2395  | 412.2554       | 458.2609         | 441.2344         | 440.2504       | 386.2762         |           | D    | 1834.8752 | 1833.8800        |           | 1894.8964        | 1877.8698       |
| 5  | 101.1073        | 558.3610        | 541.3344  | 540.3504       | <b>586.3559</b>  | 569.3293         | 568.3453       | 501.3031         |           | K    | 1706.7803 | 1705.7850        |           | <b>1779.8694</b> | 1762.8429       |
| 6  | 70.0651         | 655.4137        | 638.3872  | 637.4032       | 683.4087         | 666.3821         | 665.3981       | 629.3981         |           | P    | 1609.7275 | 1608.7322        |           | <b>1651.7744</b> | 1634.7479       |
| 7  | 136.0757        | 818.4771        | 801.4505  | 800.4665       | 846.4720         | 829.4454         | 828.4614       |                  |           | Y    | 1446.6642 |                  |           | 1554.7217        | 1537.6951       |
| 8  | 30.0338         | 875.4985        | 858.4720  | 857.4880       | <b>903.4934</b>  | 886.4669         | 885.4829       |                  |           | G    |           |                  |           | 1391.6584        | 1374.6318       |
| 9  | 86.0964         | <b>988.5826</b> | 971.5560  | 970.5720       | <b>1016.5775</b> | 999.5510         | 998.5669       | 960.5513         | 974.5669  | I    | 1276.5586 | 1289.5790        | 1303.5947 | <b>1334.6369</b> | 1317.6103       |
| 10 | 30.0338         | 1045.6041       | 1028.5775 | 1027.5935      | 1073.5990        | 1056.5724        | 1055.5884      |                  |           | G    |           |                  |           | <b>1221.5528</b> | 1204.5263       |
| 11 | 30.0338         | 1102.6255       | 1085.5990 | 1084.6150      | 1130.6204        | <b>1113.5939</b> | 1112.6099      |                  |           | G    |           |                  |           | <b>1164.5314</b> | 1147.5048       |
| 12 | 30.0338         | 1159.6470       | 1142.6204 | 1141.6364      | 1187.6419        | 1170.6154        | 1169.6313      |                  |           | G    |           |                  |           | 1107.5099        | 1090.4834       |
| 13 | 104.0528        | 1290.6875       | 1273.6609 | 1272.6769      | 1318.6824        | 1301.6558        | 1300.6718      | 1230.6841        |           | M    | 974.4538  | 973.4585         |           | <b>1050.4884</b> | 1033.4619       |
| 14 | 60.0444         | 1377.7195       | 1360.6930 | 1359.7089      | 1405.7144        | 1388.6879        | 1387.7038      | 1361.7246        |           | S    | 887.4217  | 886.4265         |           | <b>919.4480</b>  | <b>902.4214</b> |
| 15 | 72.0808         | 1476.7879       | 1459.7614 | 1458.7773      | 1504.7828        | 1487.7563        | 1486.7723      | 1462.7723        |           | V    | 788.3533  | 801.3737         |           | <b>832.4159</b>  | 815.3894        |
| 16 | 88.0393         | 1591.8149       | 1574.7883 | 1573.8043      | <b>1619.8098</b> | 1602.7832        | 1601.7992      | <b>1547.8250</b> |           | D    | 673.3264  | 672.3311         |           | <b>733.3475</b>  | <b>716.3210</b> |
| 17 | 86.0964         | 1704.8989       | 1687.8724 | 1686.8884      | 1732.8938        | 1715.8673        | 1714.8833      | 1676.8676        | 1690.8833 | I    | 560.2423  | 573.2627         | 587.2784  | <b>618.3206</b>  | 601.2940        |
| 18 | 88.0393         | 1819.9259       | 1802.8993 | 1801.9153      | <b>1847.9208</b> | 1830.8942        | 1829.9102      | 1775.9360        |           | D    | 445.2154  | 444.2201         |           | <b>505.2365</b>  | <b>488.2100</b> |
| 19 | 44.0495         | 1890.9630       | 1873.9364 | 1872.9524      | 1918.9579        | 1901.9313        | 1900.9473      |                  |           | A    | 374.1783  |                  |           | <b>390.2096</b>  | 373.1830        |
| 20 | 60.0444         | 1977.9950       | 1960.9685 | 1959.9844      | 2005.9899        | 1988.9634        | 1987.9794      | 1962.0001        |           | S    | 287.1462  | 286.1510         |           | <b>319.1724</b>  | 302.1459        |
| 21 | 30.0338         | 2035.0165       | 2017.9899 | 2017.0059      | 2063.0114        | 2045.9848        | 2045.0008      |                  |           | G    |           |                  |           | 232.1404         | 215.1139        |
| 22 | <b>129.1135</b> |                 |           |                |                  |                  |                |                  |           | R    | 74.0237   | 73.0284          |           | <b>175.1190</b>  | 158.0924        |

| Seq      | ya       | yb       | Seq      | ya       | yb       | Seq      | ya       | yb       |
|----------|----------|----------|----------|----------|----------|----------|----------|----------|
| KT       | 202.1550 | 230.1499 | KTD      | 317.1819 | 345.1769 | KTDK     | 445.2769 | 473.2718 |
| KTDKP    | 542.3297 | 570.3246 | TD       | 189.0870 | 217.0819 | TDK      | 317.1819 | 345.1769 |
| TDKP     | 414.2347 | 442.2296 | TDKPY    | 577.2980 | 605.2930 | TDKPYG   | 634.3195 | 662.3144 |
| DK       | 216.1343 | 244.1292 | DKP      | 313.1870 | 341.1819 | DKPY     | 476.2504 | 504.2453 |
| DKPYG    | 533.2718 | 561.2667 | DKPYGI   | 646.3559 | 674.3508 | KP       | 198.1601 | 226.1550 |
| KPY      | 361.2234 | 389.2183 | KPYG     | 418.2449 | 446.2398 | KPYGI    | 531.3289 | 559.3239 |
| KPYGIG   | 588.3504 | 616.3453 | KPYGIGG  | 645.3719 | 673.3668 | PY       | 233.1285 | 261.1234 |
| PYG      | 290.1499 | 318.1448 | PYGI     | 403.2340 | 431.2289 | PYGIG    | 460.2554 | 488.2504 |
| PYGIGG   | 517.2769 | 545.2718 | PYGIGGG  | 574.2984 | 602.2933 | YG       | 193.0972 | 221.0921 |
| YGI      | 306.1812 | 334.1761 | YGIG     | 363.2027 | 391.1976 | YGIGG    | 420.2241 | 448.2191 |
| YGIGGG   | 477.2456 | 505.2405 | YGIGGGM  | 608.2861 | 636.2810 | YGIGGGMS | 695.3181 | 723.3130 |
| GI       | 143.1179 | 171.1128 | GIG      | 200.1394 | 228.1343 | GIGG     | 257.1608 | 285.1557 |
| GIGGG    | 314.1823 | 342.1772 | GIGGGM   | 445.2228 | 473.2177 | GIGGGMS  | 532.2548 | 560.2497 |
| GIGGGMSV | 631.3232 | 659.3181 | IG       | 143.1179 | 171.1128 | IGG      | 200.1394 | 228.1343 |
| IGGG     | 257.1608 | 285.1557 | IGGGM    | 388.2013 | 416.1962 | IGGGMS   | 475.2333 | 503.2282 |
| IGGGMSV  | 574.3017 | 602.2967 | IGGGMSVD | 689.3287 | 717.3236 | GG       | 87.0553  | 115.0502 |
| GGG      | 144.0768 | 172.0717 | GGGM     | 275.1172 | 303.1122 | GGGMS    | 362.1493 | 390.1442 |
| GGGMSV   | 461.2177 | 489.2126 | GGGMSVD  | 576.2446 | 604.2395 | GGGMSVDI | 689.3287 | 717.3236 |
| GG       | 87.0553  | 115.0502 | GGM      | 218.0958 | 246.0907 | GGMS     | 305.1278 | 333.1227 |
| GGMSV    | 404.1962 | 432.1911 | GGMSVD   | 519.2232 | 547.2181 | GGMSVDI  | 632.3072 | 660.3021 |
| GM       | 161.0743 | 189.0692 | GMS      | 248.1063 | 276.1013 | GMSV     | 347.1748 | 375.1697 |
| GMSVD    | 462.2017 | 490.1966 | GMSVDI   | 575.2858 | 603.2807 | GMSVDID  | 690.3127 | 718.3076 |
| MS       | 191.0849 | 219.0798 | MSV      | 290.1533 | 318.1482 | MSVD     | 405.1802 | 433.1751 |
| MSVDI    | 518.2643 | 546.2592 | MSVDID   | 633.2912 | 661.2862 | SV       | 159.1128 | 187.1077 |
| SVD      | 274.1397 | 302.1347 | SVDI     | 387.2238 | 415.2187 | SVDID    | 502.2508 | 530.2457 |
| SVDIDA   | 573.2879 | 601.2828 | SVDIDAS  | 660.3199 | 688.3148 | VD       | 187.1077 | 215.1026 |
| VDI      | 300.1918 | 328.1867 | VDID     | 415.2187 | 443.2136 | VIDA     | 486.2558 | 514.2508 |
| VDIDAS   | 573.2879 | 601.2828 | VDIDASG  | 630.3093 | 658.3042 | DI       | 201.1234 | 229.1183 |
| DID      | 316.1503 | 344.1452 | DIDA     | 387.1874 | 415.1823 | DIDAS    | 474.2195 | 502.2144 |
| DIDASG   | 531.2409 | 559.2358 | ID       | 201.1234 | 229.1183 | IDA      | 272.1605 | 300.1554 |
| IDAS     | 359.1925 | 387.1874 | IDASG    | 416.2140 | 444.2089 | DA       | 159.0764 | 187.0713 |
| DAS      | 246.1084 | 274.1034 | DASG     | 303.1299 | 331.1248 | AS       | 131.0815 | 159.0764 |
| ASG      | 188.1030 | 216.0979 | SG       | 117.0659 | 145.0608 |          |          |          |

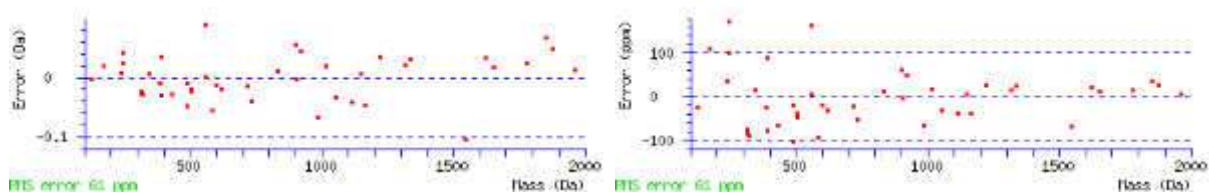

NCBI BLAST search of [IKTDKPYGIGGGMSVDIDASGR](#)  
 (Parameters: blastp, nr protein database, expect=20000, no filter, PAM30)  
 Other BLAST [web gateways](#)

All matches to this query

| Score | Mr(calc)  | Delta   | Sequence                                  |
|-------|-----------|---------|-------------------------------------------|
| 92.2  | 2236.1158 | -0.0052 | <a href="#">IKTDKPYGIGGGMSVDIDASGR</a>    |
| 13.5  | 2236.0212 | 0.0894  | <a href="#">DDLLESGMADAMSVSANORAR</a>     |
| 13.3  | 2236.0179 | 0.0927  | <a href="#">SASPRESGGGGSGSGSGSSMPPTPK</a> |
| 11.9  | 2235.9855 | 0.1251  | <a href="#">FFGKGSSTQSGSMSPTSDWAR</a>     |
| 11.8  | 2236.0819 | 0.0287  | <a href="#">VTEEGSSQSEDVKAISTNLR</a>      |
| 11.4  | 2236.0946 | 0.0160  | <a href="#">KEDPWNSIMAGAATGGFLSLR</a>     |
| 11.2  | 2236.0286 | 0.0820  | <a href="#">EMHMKGSASVEDGOMVSLLR</a>      |
| 10.9  | 2236.0980 | 0.0126  | <a href="#">VNFATITPRETNMDGCVALK</a>      |
| 10.7  | 2236.0356 | 0.0750  | <a href="#">IGGFRSAVDAAATTGEEQADDR</a>    |

|     |           |        |                                     |
|-----|-----------|--------|-------------------------------------|
| 9.8 | 2236.0286 | 0.0820 | <a href="#">EMHMKGSASVEDGQMVSLR</a> |
|-----|-----------|--------|-------------------------------------|

|                                                                                        |
|----------------------------------------------------------------------------------------|
| <b>Mascot:</b> <a href="http://www.matrixscience.com">http://www.matrixscience.com</a> |
|----------------------------------------------------------------------------------------|



**MATRIX SCIENCE Mascot Search Results**

**Peptide View Spot no 2**

MS/MS Fragmentation of **IKTDKPYGIGGGMSVDIDASGR**

Found in **gi1835731** in **NCBInr**, photosystem II 10 kDa polypeptide [Oryza sativa Indica Group]

Match to Query 187: 2252.092624 from(2253.099900,1+) intensity(0.0000) index(32)

Title: Label: K5, Spot\_Id: 219748, Peak\_List\_Id: 225863, MSMS Job\_Run\_Id: 21792, Comment:

Data file C:\Documents and Settings\Administrator\Desktop\farah BHU\spot set plate\Farah-Garima 11May 2013\ppw\_K5\_136842223800.txt

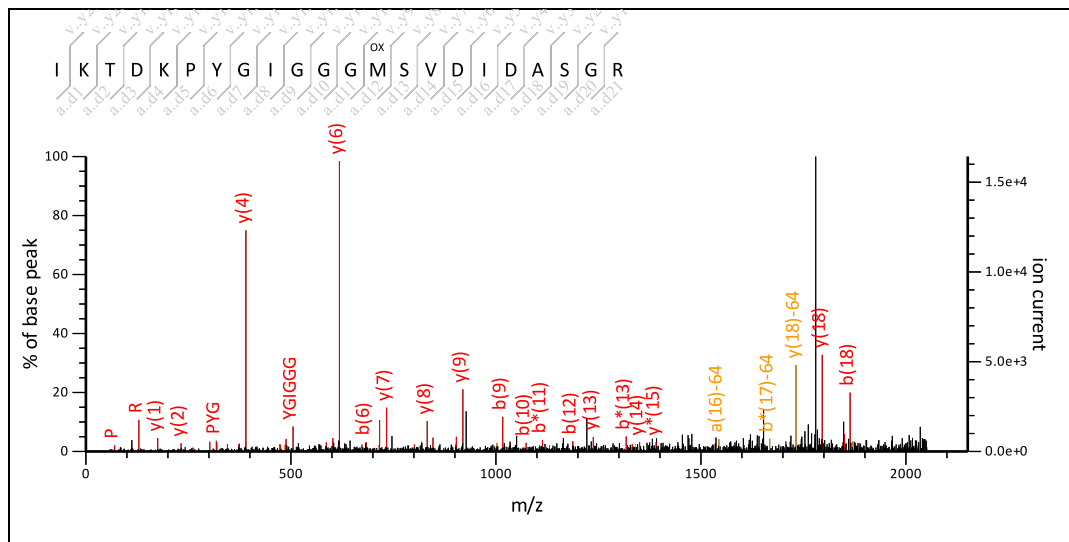

Navigation icons: Home, Back, Forward, Search, Print, etc. Range: 0 to 2150.76

Label all possible matches  Label matches used for scoring

Monoisotopic mass of neutral peptide Mr(calc): 2252.1107

Fixed modifications: Carbamidomethyl (C) (apply to specified residues or termini only)

Variable modifications:

M13 : Oxidation (M), with neutral losses 0.0000 (shown in table), 63.9983

Ions Score: 68 Expect: 0.0002

Matches : 75/606 fragment ions using 140 most intense peaks [\(help\)](#)

| #  | Immon.   | a         | a*        | a <sup>0</sup> | b         | b*        | b <sup>0</sup> | d         | d'        | Seq. | v         | w         | w'        | y         | y*        |
|----|----------|-----------|-----------|----------------|-----------|-----------|----------------|-----------|-----------|------|-----------|-----------|-----------|-----------|-----------|
| 1  | 86.0964  | 86.0964   |           |                | 114.0913  |           |                | 44.0495   |           | I    |           |           |           |           |           |
| 2  | 101.1073 | 214.1914  | 197.1648  |                | 242.1863  | 225.1598  |                | 157.1335  |           | K    | 2066.9448 | 2065.9495 |           | 2140.0339 | 2123.0074 |
| 3  | 74.0600  | 315.2391  | 298.2125  | 297.2285       | 343.2340  | 326.2074  | 325.2234       | 299.2442  | 301.2234  | T    | 1965.8971 | 1978.9175 | 1980.8967 | 2011.9389 | 1994.9124 |
| 4  | 88.0393  | 430.2660  | 413.2395  | 412.2554       | 458.2609  | 441.2344  | 440.2504       | 386.2762  |           | D    | 1850.8701 | 1849.8749 |           | 1910.8913 | 1893.8647 |
| 5  | 101.1073 | 558.3610  | 541.3344  | 540.3504       | 586.3559  | 569.3293  | 568.3453       | 501.3031  |           | K    | 1722.7752 | 1721.7799 |           | 1795.8643 | 1778.8378 |
| 6  | 70.0651  | 655.4137  | 638.3872  | 637.4032       | 683.4087  | 666.3821  | 665.3981       | 629.3981  |           | P    | 1625.7224 | 1624.7272 |           | 1667.7694 | 1650.7428 |
| 7  | 136.0757 | 818.4771  | 801.4505  | 800.4665       | 846.4720  | 829.4454  | 828.4614       |           |           | Y    | 1462.6591 |           |           | 1570.7166 | 1553.6901 |
| 8  | 30.0338  | 875.4985  | 858.4720  | 857.4880       | 903.4934  | 886.4669  | 885.4829       |           |           | G    |           |           |           | 1407.6533 | 1390.6267 |
| 9  | 86.0964  | 988.5826  | 971.5560  | 970.5720       | 1016.5775 | 999.5510  | 998.5669       | 960.5513  | 974.5669  | I    | 1292.5536 | 1305.5740 | 1319.5896 | 1350.6318 | 1333.6053 |
| 10 | 30.0338  | 1045.6041 | 1028.5775 | 1027.5935      | 1073.5990 | 1056.5724 | 1055.5884      |           |           | G    |           |           |           | 1237.5477 | 1220.5212 |
| 11 | 30.0338  | 1102.6255 | 1085.5990 | 1084.6150      | 1130.6204 | 1113.5939 | 1112.6099      |           |           | G    |           |           |           | 1180.5263 | 1163.4997 |
| 12 | 30.0338  | 1159.6470 | 1142.6204 | 1141.6364      | 1187.6419 | 1170.6154 | 1169.6313      |           |           | G    |           |           |           | 1123.5048 | 1106.4783 |
| 13 | 120.0478 | 1306.6824 | 1289.6558 | 1288.6718      | 1334.6773 | 1317.6508 | 1316.6667      | 1230.6841 |           | M    | 974.4538  | 973.4585  |           | 1066.4834 | 1049.4568 |
| 14 | 60.0444  | 1393.7144 | 1376.6879 | 1375.7038      | 1421.7093 | 1404.6828 | 1403.6988      | 1377.7195 |           | S    | 887.4217  | 886.4265  |           | 919.4480  | 902.4214  |
| 15 | 72.0808  | 1492.7828 | 1475.7563 | 1474.7723      | 1520.7777 | 1503.7512 | 1502.7672      | 1478.7672 |           | V    | 788.3533  | 801.3737  |           | 832.4159  | 815.3894  |
| 16 | 88.0393  | 1607.8098 | 1590.7832 | 1589.7992      | 1635.8047 | 1618.7781 | 1617.7941      | 1563.8199 |           | D    | 673.3264  | 672.3311  |           | 733.3475  | 716.3210  |
| 17 | 86.0964  | 1720.8938 | 1703.8673 | 1702.8833      | 1748.8888 | 1731.8622 | 1730.8782      | 1692.8625 | 1706.8782 | I    | 560.2423  | 573.2627  | 587.2784  | 618.3206  | 601.2940  |
| 18 | 88.0393  | 1835.9208 | 1818.8942 | 1817.9102      | 1863.9157 | 1846.8891 | 1845.9051      | 1791.9309 |           | D    | 445.2154  | 444.2201  |           | 505.2365  | 488.2100  |
| 19 | 44.0495  | 1906.9579 | 1889.9313 | 1888.9473      | 1934.9528 | 1917.9263 | 1916.9422      |           |           | A    | 374.1783  |           |           | 390.2096  | 373.1830  |
| 20 | 60.0444  | 1993.9899 | 1976.9634 | 1975.9794      | 2021.9848 | 2004.9583 | 2003.9743      | 1977.9950 |           | S    | 287.1462  | 286.1510  |           | 319.1724  | 302.1459  |

|    |                 |           |           |           |           |           |           |  |  |          |         |         |                 |          |
|----|-----------------|-----------|-----------|-----------|-----------|-----------|-----------|--|--|----------|---------|---------|-----------------|----------|
| 21 | 30.0338         | 2051.0114 | 2033.9848 | 2033.0008 | 2079.0063 | 2061.9797 | 2060.9957 |  |  | <b>G</b> |         |         | <b>232.1404</b> | 215.1139 |
| 22 | <b>129.1135</b> |           |           |           |           |           |           |  |  | <b>R</b> | 74.0237 | 73.0284 | <b>175.1190</b> | 158.0924 |

| Seq     | ya       | yb              | Seq     | ya              | yb              | Seq      | ya              | yb              |
|---------|----------|-----------------|---------|-----------------|-----------------|----------|-----------------|-----------------|
| KT      | 202.1550 | 230.1499        | KTD     | 317.1819        | <b>345.1769</b> | KTDK     | 445.2769        | <b>473.2718</b> |
| KTDKP   | 542.3297 | 570.3246        | TD      | 189.0870        | 217.0819        | TDK      | 317.1819        | <b>345.1769</b> |
| TDKP    | 414.2347 | 442.2296        | TDKPY   | 577.2980        | 605.2930        | TDKPYG   | 634.3195        | 662.3144        |
| DK      | 216.1343 | 244.1292        | DKP     | 313.1870        | 341.1819        | DKPY     | 476.2504        | 504.2453        |
| DKPYG   | 533.2718 | 561.2667        | DKPYGI  | 646.3559        | 674.3508        | KP       | 198.1601        | 226.1550        |
| KPY     | 361.2234 | <b>389.2183</b> | KPYG    | 418.2449        | 446.2398        | KPYGI    | 531.3289        | 559.3239        |
| KPYGIG  | 588.3504 | <b>616.3453</b> | KPYGIGG | 645.3719        | <b>673.3668</b> | PY       | <b>233.1285</b> | <b>261.1234</b> |
| PYG     | 290.1499 | <b>318.1448</b> | PYGI    | 403.2340        | 431.2289        | PYGIG    | 460.2554        | <b>488.2504</b> |
| PYGIGG  | 517.2769 | 545.2718        | PYGIGGG | 574.2984        | <b>602.2933</b> | YG       | 193.0972        | 221.0921        |
| YGI     | 306.1812 | 334.1761        | YGIG    | 363.2027        | 391.1976        | YGIGG    | 420.2241        | 448.2191        |
| YGIGGG  | 477.2456 | <b>505.2405</b> | YGIGGGM | 624.2810        | 652.2759        | GI       | 143.1179        | 171.1128        |
| GIG     | 200.1394 | 228.1343        | GIGG    | 257.1608        | 285.1557        | GIGGG    | 314.1823        | 342.1772        |
| GIGGGM  | 461.2177 | 489.2126        | GIGGGMS | 548.2497        | 576.2446        | GIGGGMSV | 647.3181        | 675.3130        |
| IG      | 143.1179 | 171.1128        | IGG     | 200.1394        | 228.1343        | IGGG     | 257.1608        | 285.1557        |
| IGGGM   | 404.1962 | 432.1911        | IGGMS   | 491.2282        | 519.2232        | IGGMSV   | 590.2967        | <b>618.2916</b> |
| GG      | 87.0553  | 115.0502        | GGG     | 144.0768        | 172.0717        | GGGM     | 291.1122        | <b>319.1071</b> |
| GGGMS   | 378.1442 | 406.1391        | GGGMSV  | 477.2126        | <b>505.2075</b> | GGGMSVD  | 592.2395        | 620.2345        |
| GG      | 87.0553  | 115.0502        | GGM     | 234.0907        | 262.0856        | GGMS     | 321.1227        | 349.1176        |
| GGMSV   | 420.1911 | 448.1860        | GGMSVD  | 535.2181        | 563.2130        | GGMSVDI  | 648.3021        | 676.2971        |
| GM      | 177.0692 | 205.0641        | GMS     | 264.1013        | 292.0962        | GMSV     | 363.1697        | 391.1646        |
| GMSVD   | 478.1966 | 506.1915        | GMSVDI  | 591.2807        | 619.2756        | MS       | 207.0798        | 235.0747        |
| MSV     | 306.1482 | 334.1431        | MSVD    | 421.1751        | 449.1701        | MSVDI    | 534.2592        | 562.2541        |
| MSVDID  | 649.2862 | 677.2811        | SV      | 159.1128        | 187.1077        | SVD      | 274.1397        | <b>302.1347</b> |
| SVDI    | 387.2238 | 415.2187        | SVDID   | 502.2508        | 530.2457        | SVDIDA   | 573.2879        | 601.2828        |
| SVDIDAS | 660.3199 | 688.3148        | VD      | 187.1077        | 215.1026        | VDI      | 300.1918        | 328.1867        |
| VDID    | 415.2187 | 443.2136        | VDIDA   | 486.2558        | 514.2508        | VDIDAS   | 573.2879        | 601.2828        |
| VDIDASG | 630.3093 | 658.3042        | DI      | 201.1234        | 229.1183        | DID      | 316.1503        | 344.1452        |
| DIDA    | 387.1874 | 415.1823        | DIDAS   | <b>474.2195</b> | 502.2144        | DIDASG   | 531.2409        | 559.2358        |
| ID      | 201.1234 | 229.1183        | IDA     | 272.1605        | 300.1554        | IDAS     | 359.1925        | 387.1874        |
| IDASG   | 416.2140 | 444.2089        | DA      | 159.0764        | 187.0713        | DAS      | 246.1084        | 274.1034        |
| DASG    | 303.1299 | 331.1248        | AS      | 131.0815        | 159.0764        | ASG      | 188.1030        | 216.0979        |
| SG      | 117.0659 | 145.0608        |         |                 |                 |          |                 |                 |

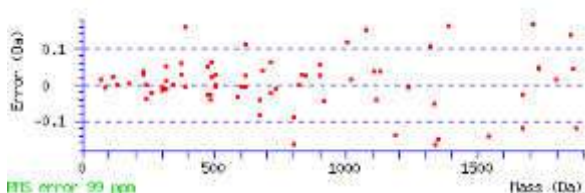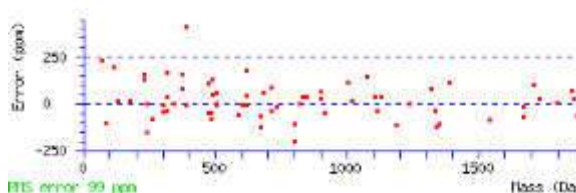

NCBI BLAST search of [IKTDKPYGIGGGMSVDIDASGR](#)  
 (Parameters: blastp, nr protein database, expect=20000, no filter, PAM30)  
 Other BLAST [web gateways](#)

All matches to this query

| Score | Mr(calc)  | Delta   | Sequence                               |
|-------|-----------|---------|----------------------------------------|
| 68.0  | 2252.1107 | -0.0181 | <a href="#">IKTDKPYGIGGGMSVDIDASGR</a> |
| 14.4  | 2252.1140 | -0.0214 | <a href="#">QSSSLVETAIMSTMNNISIAR</a>  |
| 11.4  | 2251.8958 | 0.1969  | <a href="#">MGEADDARDAVEEMDVGDDR</a>   |
| 10.8  | 2252.1073 | -0.0147 | <a href="#">TVVAGONEFEVFKADLENSR</a>   |
| 10.6  | 2252.1037 | -0.0110 | <a href="#">KCSIIMELMDGDLALMQR</a>     |
| 9.8   | 2252.1284 | -0.0358 | <a href="#">LEAHANDVLETLDTLLSENK</a>   |
| 9.2   | 2252.1702 | -0.0776 | <a href="#">NSFRPNETAEGLYGGALLGLR</a>  |

|     |           |        |                                      |
|-----|-----------|--------|--------------------------------------|
| 8.9 | 2252.0610 | 0.0316 | <a href="#">TVSDRPFENDHRYEIDDQK</a>  |
| 8.7 | 2251.9751 | 0.1176 | <a href="#">MATQTLDSHOTSTTDEETEK</a> |
| 8.5 | 2251.9677 | 0.1249 | <a href="#">DTQSTQDVADGTTTVDNVDR</a> |

Mascot: <http://www.matrixscience.com/>



# Mascot Search Results

## Peptide View **Spot no 4**

### MS/MS Fragmentation of **SPGYDGR**

Found in **gi|671740** in **NCBI**nr, ribulose-bisphosphate carboxylase [synthetic construct]

Match to Query 7: 913.384024 from(914.391300,1+) intensity(0.0000) index(1)

Title: Label: J5, Spot\_Id: 219747, Peak\_List\_Id: 225845, MSMS Job\_Run\_Id: 21791, Comment:

Data file C:\Documents and Settings\Administrator\Desktop\farah BHU\spot set plate\Farah-Garima 11May 2013\ppw\_J5\_136842222100.txt

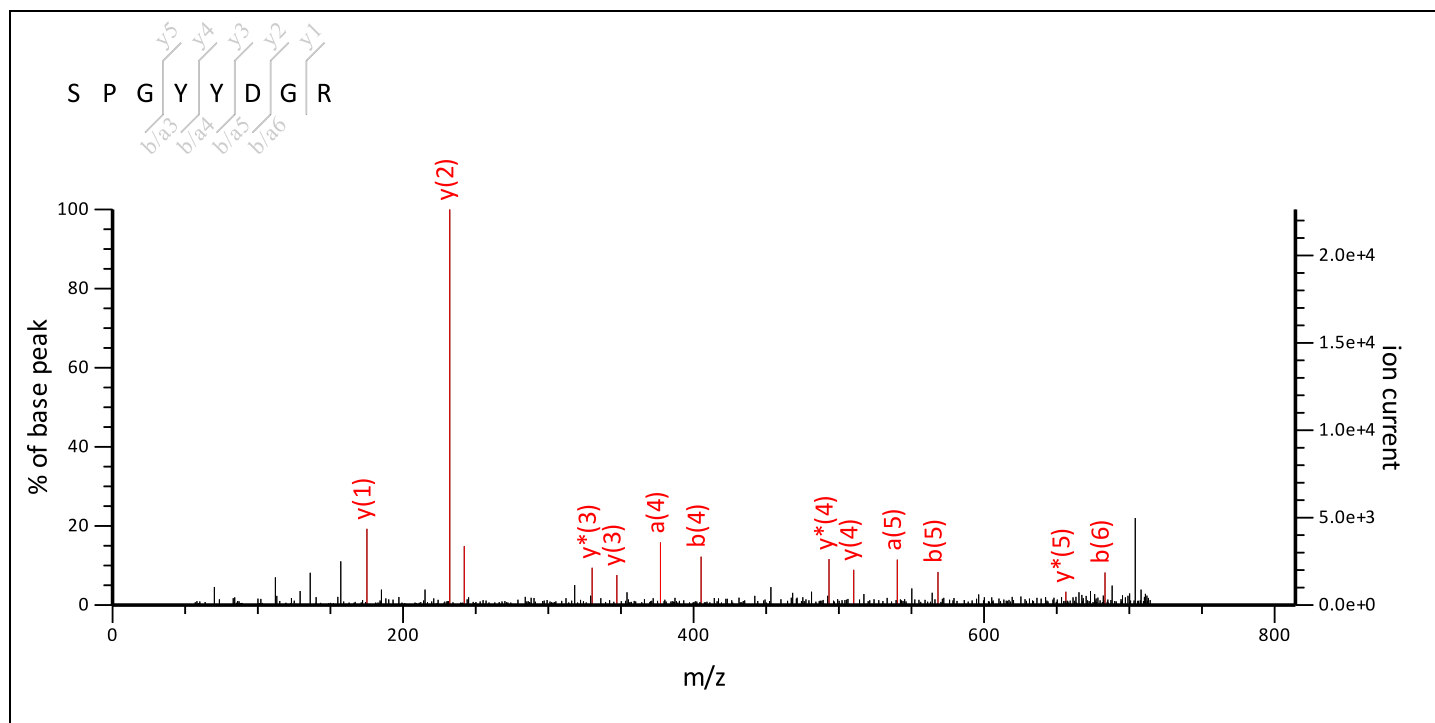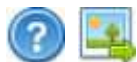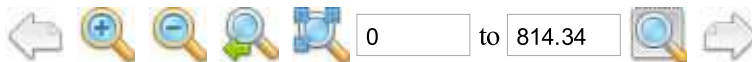

Label all possible matches  Label matches used for scoring

**Monoisotopic mass of neutral peptide Mr(calc):** 913.3930

**Fixed modifications:** Carbamidomethyl (C) (apply to specified residues or termini only)

**Ions Score:** 27 **Expect:** 3.9

**Matches :** 13/28 fragment ions using 21 most intense peaks ([help](#))

| # | a               | b               | Seq. | y               | y*              | # |
|---|-----------------|-----------------|------|-----------------|-----------------|---|
| 1 | 60.0444         | 88.0393         | S    |                 |                 | 8 |
| 2 | 157.0972        | 185.0921        | P    | 827.3682        | 810.3417        | 7 |
| 3 | 214.1186        | <b>242.1135</b> | G    | 730.3155        | 713.2889        | 6 |
| 4 | <b>377.1819</b> | <b>405.1769</b> | Y    | 673.2940        | <b>656.2675</b> | 5 |
| 5 | <b>540.2453</b> | <b>568.2402</b> | Y    | <b>510.2307</b> | 493.2041        | 4 |
| 6 | 655.2722        | <b>683.2671</b> | D    | <b>347.1674</b> | 330.1408        | 3 |
| 7 | 712.2937        | 740.2886        | G    | <b>232.1404</b> | 215.1139        | 2 |
| 8 |                 |                 | R    | <b>175.1190</b> | 158.0924        | 1 |

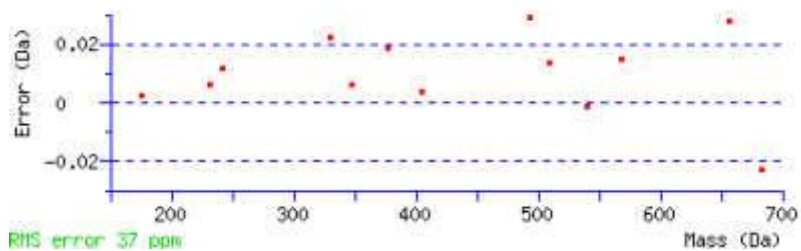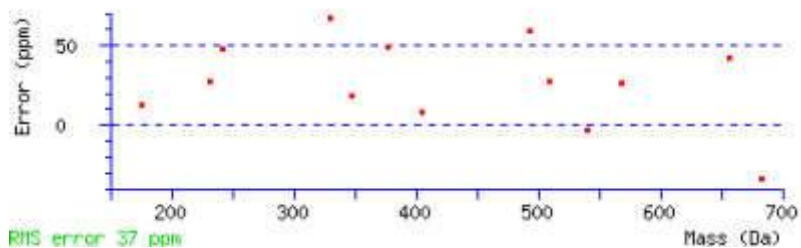

NCBI **BLAST** search of [SPGYDGR](#)

(Parameters: blastp, nr protein database, expect=20000, no filter, PAM30)

Other BLAST [web gateways](#)

#### All matches to this query

| Score | Mr(calc) | Delta   | Sequence                  |
|-------|----------|---------|---------------------------|
| 27.0  | 913.3930 | -0.0090 | <a href="#">SPGYDGR</a>   |
| 27.0  | 913.3930 | -0.0090 | <a href="#">SPGYDGR</a>   |
| 24.2  | 913.4076 | -0.0236 | <a href="#">RMTYDGR</a>   |
| 22.1  | 913.3964 | -0.0123 | <a href="#">ASVMYDGR</a>  |
| 22.1  | 913.4294 | -0.0453 | <a href="#">FEKYDGR</a>   |
| 22.1  | 913.3786 | 0.0054  | <a href="#">MCLYDGR</a>   |
| 16.3  | 913.4042 | -0.0202 | <a href="#">GGSGYFNGR</a> |
| 15.7  | 913.4657 | -0.0817 | <a href="#">QLYYATR</a>   |
| 15.2  | 913.3964 | -0.0123 | <a href="#">YMSLGDGR</a>  |
| 14.1  | 913.4254 | -0.0413 | <a href="#">QVPENDGR</a>  |

Mascot: <http://www.matrixscience.com/>

# MATRIX SCIENCE Mascot Search Results

## Peptide View **Spot no 4**

### MS/MS Fragmentation of **IIGFDNVR**

Found in **gi|671740** in **NCBI**nr, ribulose-bisphosphate carboxylase [synthetic construct]

Match to Query 11: 932.502614 from(933.509890,1+) intensity(0.0000) index(2)

Title: Label: J5, Spot\_Id: 219747, Peak\_List\_Id: 225844, MSMS Job\_Run\_Id: 21791, Comment:

Data file C:\Documents and Settings\Administrator\Desktop\farah BHU\spot set plate\Farah-Garima 11May 2013\ppw\_J5\_136842222100.txt

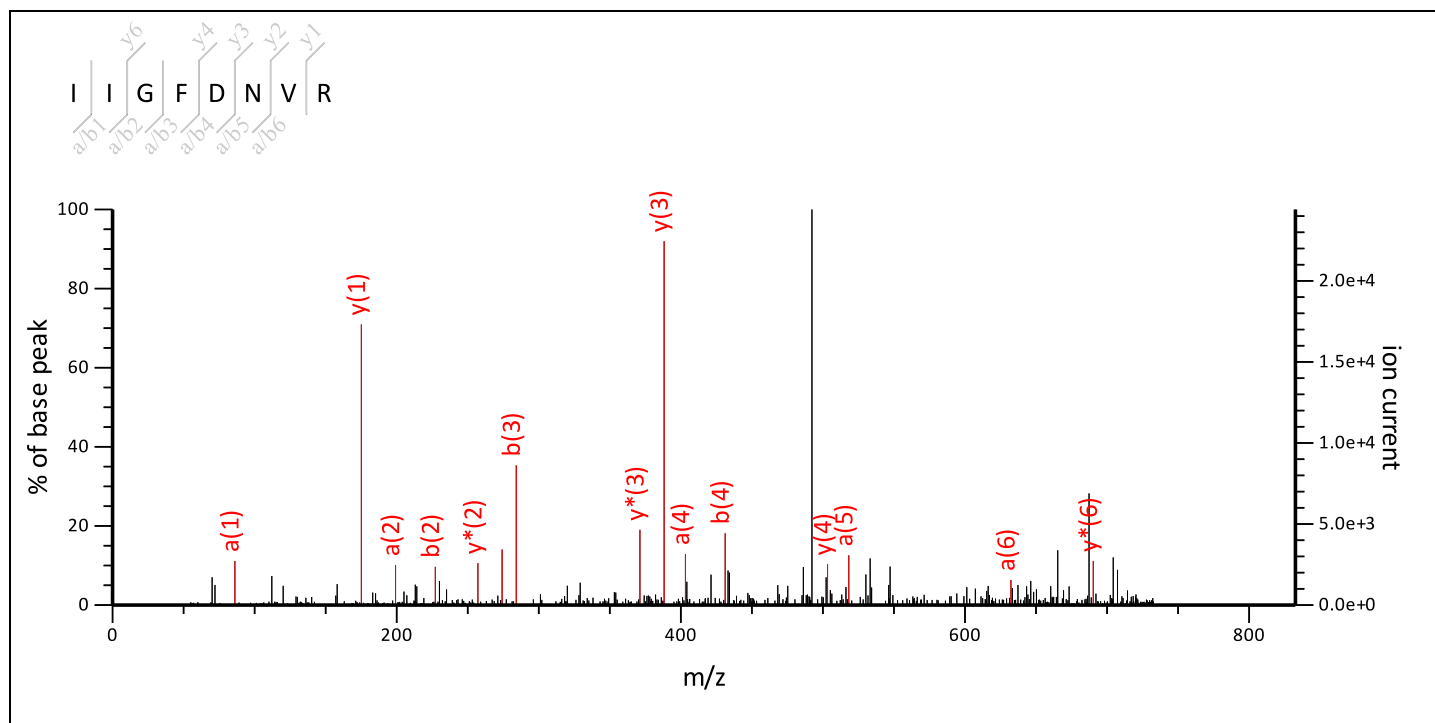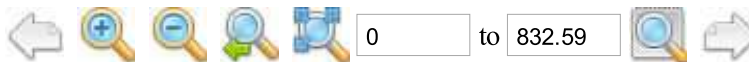

Label all possible matches  Label matches used for scoring

**Monoisotopic mass of neutral peptide Mr(calc):** 932.5080

**Fixed modifications:** Carbamidomethyl (C) (apply to specified residues or termini only)

**Ions Score:** 28 **Expect:** 4.8

**Matches :** 15/32 fragment ions using 28 most intense peaks ([help](#))

| # | a        | a*       | b        | b*       | Seq. | y        | y*       | # |
|---|----------|----------|----------|----------|------|----------|----------|---|
| 1 | 86.0964  |          | 114.0913 |          | I    |          |          | 8 |
| 2 | 199.1805 |          | 227.1754 |          | I    | 820.4312 | 803.4046 | 7 |
| 3 | 256.2020 |          | 284.1969 |          | G    | 707.3471 | 690.3206 | 6 |
| 4 | 403.2704 |          | 431.2653 |          | F    | 650.3256 | 633.2991 | 5 |
| 5 | 518.2973 |          | 546.2922 |          | D    | 503.2572 | 486.2307 | 4 |
| 6 | 632.3402 | 615.3137 | 660.3352 | 643.3086 | N    | 388.2303 | 371.2037 | 3 |
| 7 | 731.4087 | 714.3821 | 759.4036 | 742.3770 | V    | 274.1874 | 257.1608 | 2 |
| 8 |          |          |          |          | R    | 175.1190 | 158.0924 | 1 |

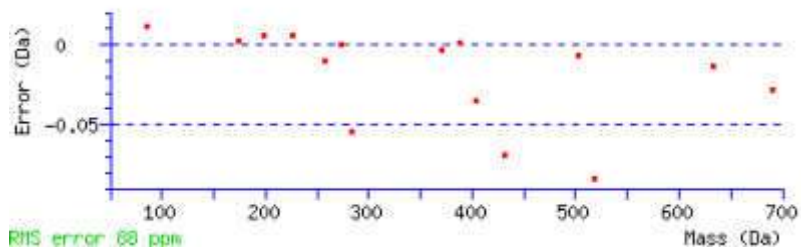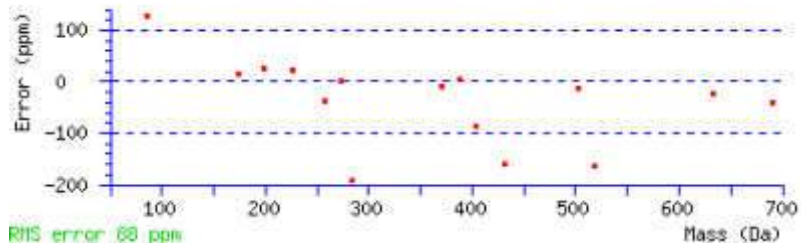

NCBI **BLAST** search of [IIGFDNVR](#)

(Parameters: blastp, nr protein database, expect=20000, no filter, PAM30)

Other BLAST [web gateways](#)

#### All matches to this query

| Score | Mr(calc) | Delta   | Sequence                  |
|-------|----------|---------|---------------------------|
| 27.8  | 932.5080 | -0.0054 | <a href="#">IIGFDNVR</a>  |
| 24.8  | 932.5728 | -0.0702 | <a href="#">LITAMKLK</a>  |
| 24.5  | 932.4352 | 0.0674  | <a href="#">DNADPFVR</a>  |
| 23.5  | 932.5113 | -0.0087 | <a href="#">KTAMVEVR</a>  |
| 22.3  | 932.5080 | -0.0054 | <a href="#">VFLADNVR</a>  |
| 21.9  | 932.4749 | 0.0277  | <a href="#">VMSIDNVR</a>  |
| 21.8  | 932.5331 | -0.0305 | <a href="#">LLGFDOIK</a>  |
| 21.1  | 932.4862 | 0.0165  | <a href="#">LERMNVR</a>   |
| 21.1  | 932.5080 | -0.0054 | <a href="#">LVAFDNVR</a>  |
| 20.9  | 932.4134 | 0.0892  | <a href="#">GDGAMNNVR</a> |

Mascot: <http://www.matrixscience.com/>



# MATRIX SCIENCE Mascot Search Results

## Peptide View **Spot no 4**

### MS/MS Fragmentation of **AYPDAFVR**

Found in **gi|671740** in **NCBI**nr, ribulose-bisphosphate carboxylase [synthetic construct]

Match to Query 13: 937.455374 from(938.462650,1+) intensity(0.0000) index(3)

Title: Label: J5, Spot\_Id: 219747, Peak\_List\_Id: 225843, MSMS Job\_Run\_Id: 21791, Comment:

Data file C:\Documents and Settings\Administrator\Desktop\farah BHU\spot set plate\Farah-Garima 11May 2013\ppw\_J5\_136842222100.txt

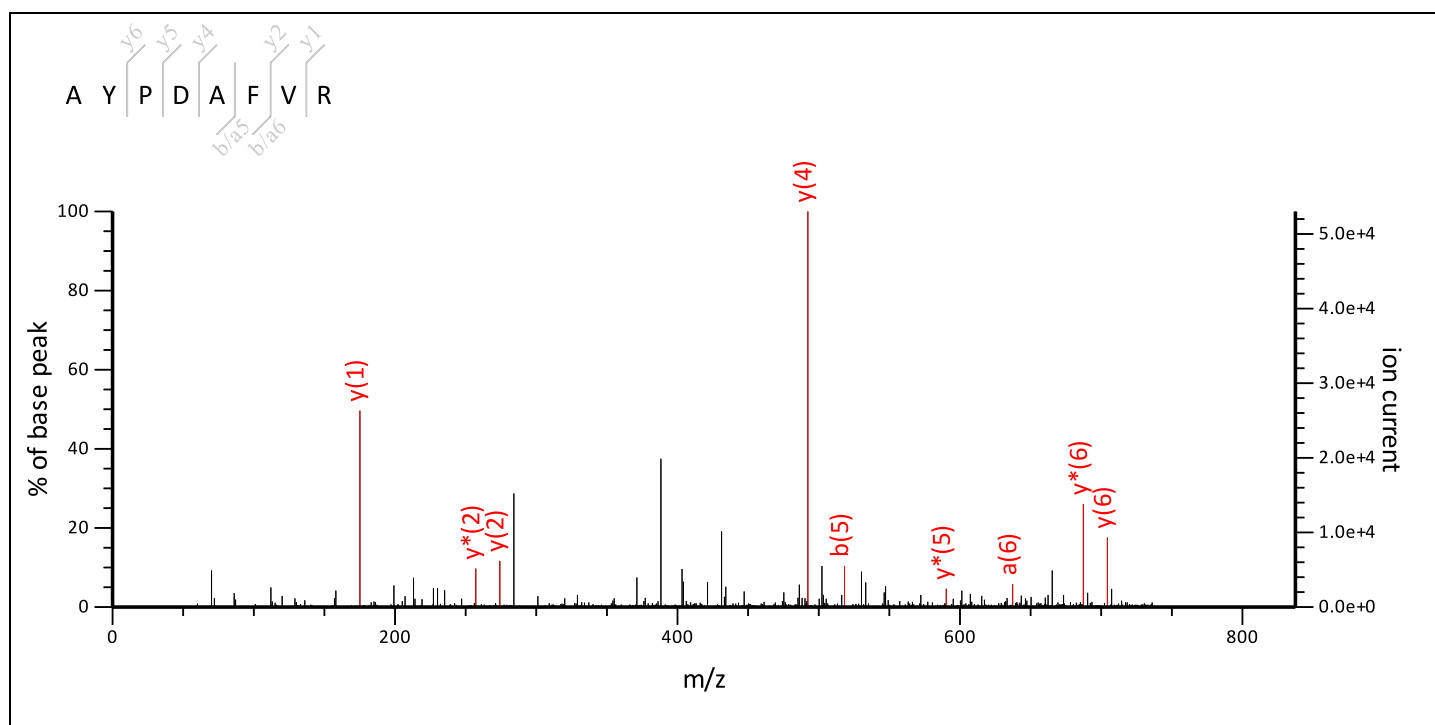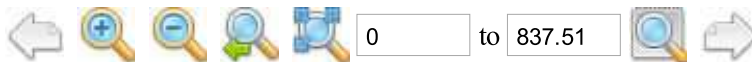

Label all possible matches  Label matches used for scoring

**Monoisotopic mass of neutral peptide Mr(calc):** 937.4658

**Fixed modifications:** Carbamidomethyl (C) (apply to specified residues or termini only)

**Ions Score:** 25 **Expect:** 7

**Matches :** 9/28 fragment ions using 14 most intense peaks ([help](#))

| # | a        | b        | Seq. | y        | y*       | # |
|---|----------|----------|------|----------|----------|---|
| 1 | 44.0495  | 72.0444  | A    |          |          | 8 |
| 2 | 207.1128 | 235.1077 | Y    | 867.4359 | 850.4094 | 7 |
| 3 | 304.1656 | 332.1605 | P    | 704.3726 | 687.3461 | 6 |
| 4 | 419.1925 | 447.1874 | D    | 607.3198 | 590.2933 | 5 |
| 5 | 490.2296 | 518.2245 | A    | 492.2929 | 475.2663 | 4 |
| 6 | 637.2980 | 665.2930 | F    | 421.2558 | 404.2292 | 3 |
| 7 | 736.3665 | 764.3614 | V    | 274.1874 | 257.1608 | 2 |
| 8 |          |          | R    | 175.1190 | 158.0924 | 1 |

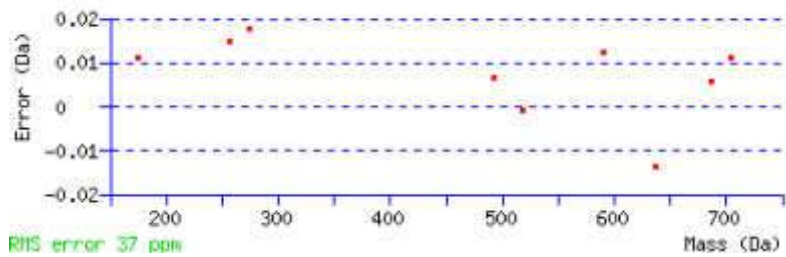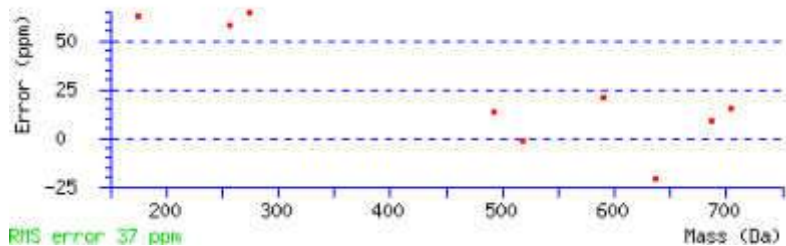

NCBI **BLAST** search of [AYPDAFVR](#)

(Parameters: blastp, nr protein database, expect=20000, no filter, PAM30)

Other BLAST [web gateways](#)

#### All matches to this query

| Score | Mr(calc) | Delta   | Sequence                 |
|-------|----------|---------|--------------------------|
| 24.9  | 937.4658 | -0.0104 | <a href="#">AYPDAFVR</a> |
| 21.6  | 937.5055 | -0.0502 | <a href="#">FSSVLMVR</a> |
| 18.6  | 937.4254 | 0.0300  | <a href="#">HPGEEDVR</a> |
| 18.4  | 937.4552 | 0.0002  | <a href="#">FSNRCVR</a>  |
| 18.3  | 937.4658 | -0.0104 | <a href="#">SWYVEVR</a>  |
| 17.1  | 937.4691 | -0.0138 | <a href="#">AVPYSMVR</a> |
| 16.9  | 937.4658 | -0.0104 | <a href="#">SFPADFVR</a> |
| 16.7  | 937.5021 | -0.0468 | <a href="#">AYVPAYVR</a> |
| 16.2  | 937.4691 | -0.0138 | <a href="#">EMAVFAVR</a> |
| 15.4  | 937.5022 | -0.0468 | <a href="#">IFADAFVR</a> |

Mascot: <http://www.matrixscience.com/>

# MATRIX SCIENCE Mascot Search Results

## Peptide View Spot no 4

MS/MS Fragmentation of **KAYPDAFVR**

Found in **gi|671740** in **NCBIInr**, ribulose-bisphosphate carboxylase [synthetic construct]

Match to Query 27: 1065.567024 from(1066.574300,1+) intensity(0.0000) index(8)

Title: Label: J5, Spot\_Id: 219747, Peak\_List\_Id: 225847, MSMS Job\_Run\_Id: 21791, Comment:

Data file C:\Documents and Settings\Administrator\Desktop\farah BHU\spot set plate\Farah-Garima 11May 2013\ppw\_J5\_136842222100.txt

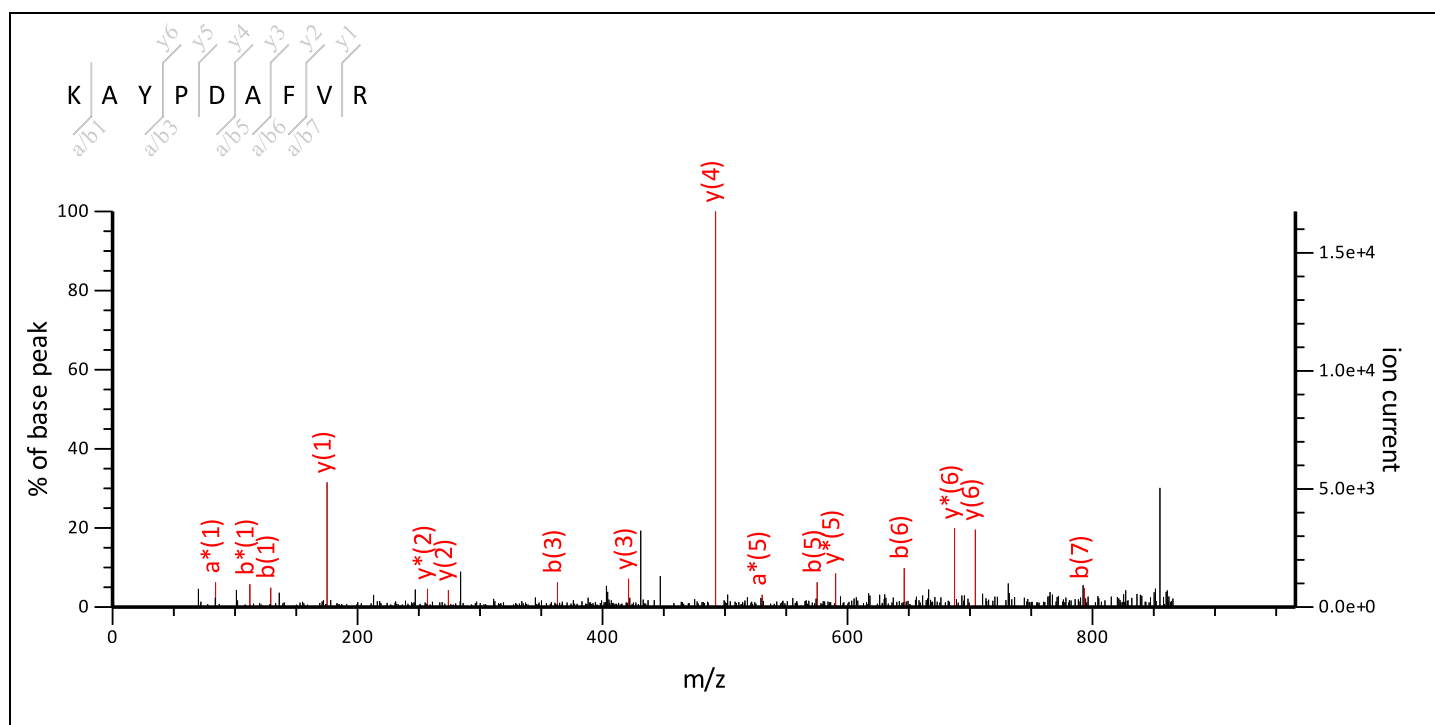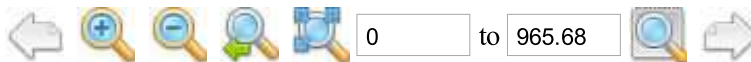

Label all possible matches  Label matches used for scoring

**Monoisotopic mass of neutral peptide Mr(calc):** 1065.5607

**Fixed modifications:** Carbamidomethyl (C) (apply to specified residues or termini only)

**Ions Score:** 33 **Expect:** 1.2

**Matches:** 16/48 fragment ions using 24 most intense peaks ([help](#))

| # | a        | a*       | b        | b*       | Seq. | y        | y*       | # |
|---|----------|----------|----------|----------|------|----------|----------|---|
| 1 | 101.1073 | 84.0808  | 129.1022 | 112.0757 | K    |          |          | 9 |
| 2 | 172.1444 | 155.1179 | 200.1394 | 183.1128 | A    | 938.4730 | 921.4465 | 8 |
| 3 | 335.2078 | 318.1812 | 363.2027 | 346.1761 | Y    | 867.4359 | 850.4094 | 7 |
| 4 | 432.2605 | 415.2340 | 460.2554 | 443.2289 | P    | 704.3726 | 687.3461 | 6 |
| 5 | 547.2875 | 530.2609 | 575.2824 | 558.2558 | D    | 607.3198 | 590.2933 | 5 |
| 6 | 618.3246 | 601.2980 | 646.3195 | 629.2930 | A    | 492.2929 | 475.2663 | 4 |
| 7 | 765.3930 | 748.3665 | 793.3879 | 776.3614 | F    | 421.2558 | 404.2292 | 3 |
| 8 | 864.4614 | 847.4349 | 892.4563 | 875.4298 | V    | 274.1874 | 257.1608 | 2 |

|   |  |  |  |  |   |          |          |   |
|---|--|--|--|--|---|----------|----------|---|
| 9 |  |  |  |  | R | 175.1190 | 158.0924 | 1 |
|---|--|--|--|--|---|----------|----------|---|

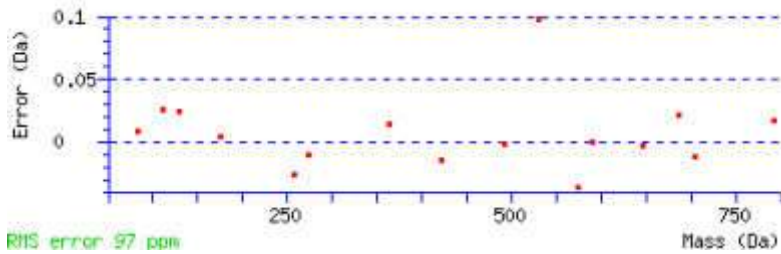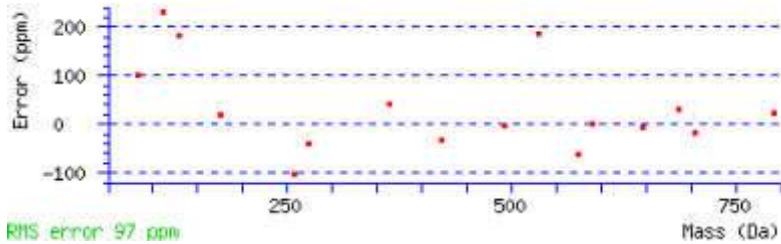

NCBI BLAST search of [KAYPDAFVR](#)

(Parameters: blastp, nr protein database, expect=20000, no filter, PAM30)

Other BLAST [web gateways](#)

#### All matches to this query

| Score | Mr(calc)  | Delta  | Sequence                   |
|-------|-----------|--------|----------------------------|
| 32.8  | 1065.5607 | 0.0063 | <a href="#">KAYPDAFVR</a>  |
| 20.8  | 1065.5091 | 0.0579 | <a href="#">KTDDDAFVR</a>  |
| 18.1  | 1065.5390 | 0.0281 | <a href="#">RVFDGMAVR</a>  |
| 16.4  | 1065.4695 | 0.0975 | <a href="#">MVRDGEMGR</a>  |
| 14.5  | 1065.5311 | 0.0360 | <a href="#">KMMTATEVR</a>  |
| 14.2  | 1065.5125 | 0.0546 | <a href="#">VSSMAKDGQK</a> |
| 13.1  | 1065.5100 | 0.0571 | <a href="#">MICAFGPVR</a>  |
| 13.0  | 1065.5641 | 0.0029 | <a href="#">LKDAMAVFR</a>  |
| 12.8  | 1065.4938 | 0.0732 | <a href="#">TLSTDGESTR</a> |
| 12.5  | 1065.5567 | 0.0103 | <a href="#">SQFNKTSVR</a>  |

Mascot: <http://www.matrixscience.com/>

# MATRIX SCIENCE Mascot Search Results

## Peptide View **Spot no 4**

MS/MS Fragmentation of **MQVWPIEGIK**

Found in **gi|671740** in **NCBI**nr, ribulose-bisphosphate carboxylase [synthetic construct]

Match to Query 42: 1215.620924 from(1216.628200,1+) intensity(0.0000) index(13)

Title: Label: J5, Spot\_Id: 219747, Peak\_List\_Id: 225851, MSMS Job\_Run\_Id: 21791, Comment:

Data file C:\Documents and Settings\Administrator\Desktop\farah BHU\spot set plate\Farah-Garima 11May 2013\ppw\_J5\_136842222100.txt

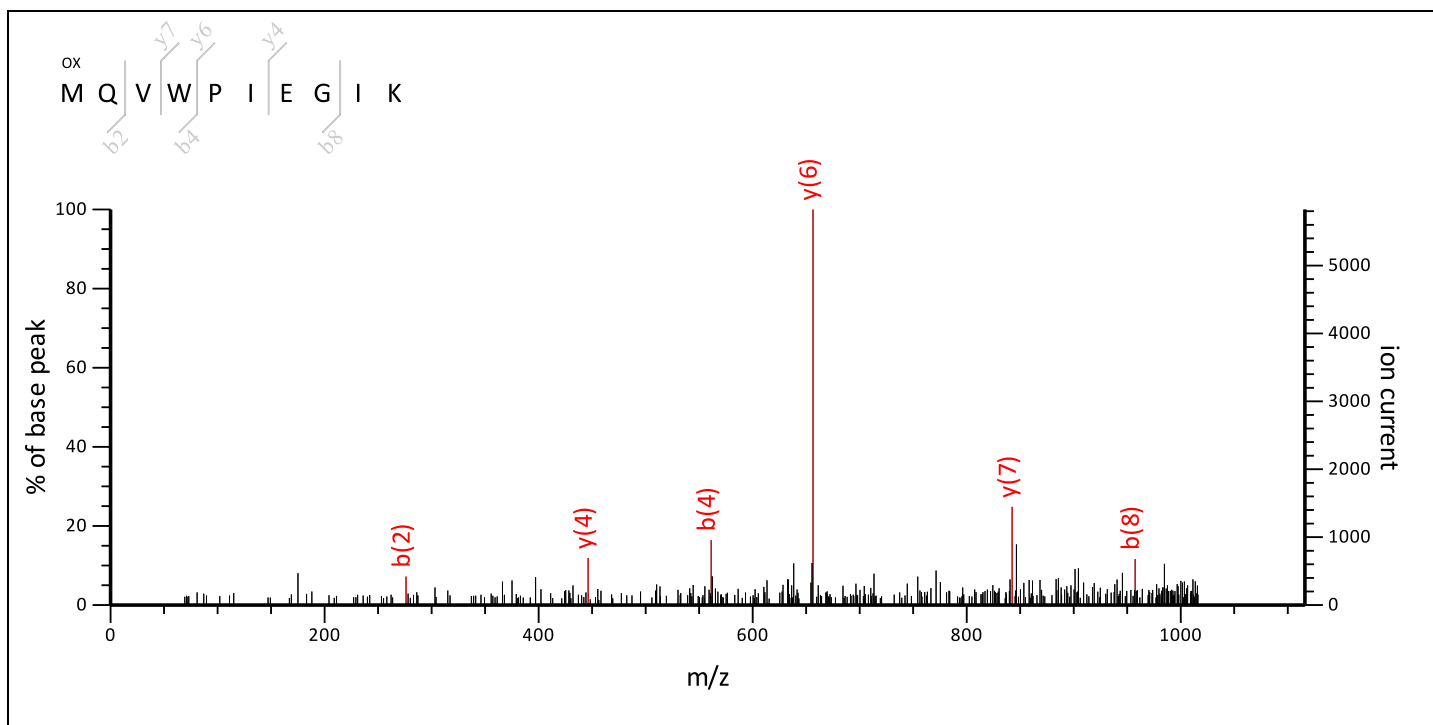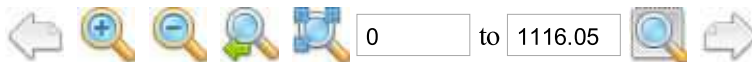

Label all possible matches  Label matches used for scoring

**Monoisotopic mass of neutral peptide Mr(calc):** 1215.6322

**Fixed modifications:** Carbamidomethyl (C) (apply to specified residues or termini only)

**Variable modifications:**

**M1** : Oxidation (M), with neutral losses 0.0000 (shown in table), 63.9983

**Ions Score:** 20 **Expect:** 25

**Matches** : 6/86 fragment ions using 10 most intense peaks ([help](#))

| # | a        | a*       | b               | b*       | Seq.     | y               | y*        | #         |
|---|----------|----------|-----------------|----------|----------|-----------------|-----------|-----------|
| 1 | 120.0478 |          | 148.0427        |          | <b>M</b> |                 |           | <b>10</b> |
| 2 | 248.1063 | 231.0798 | <b>276.1013</b> | 259.0747 | <b>Q</b> | 1069.6041       | 1052.5775 | <b>9</b>  |
| 3 | 347.1748 | 330.1482 | 375.1697        | 358.1431 | <b>V</b> | 941.5455        | 924.5189  | <b>8</b>  |
| 4 | 533.2541 | 516.2275 | <b>561.2490</b> | 544.2224 | <b>W</b> | <b>842.4771</b> | 825.4505  | <b>7</b>  |
| 5 | 630.3068 | 613.2803 | 658.3017        | 641.2752 | <b>P</b> | <b>656.3978</b> | 639.3712  | <b>6</b>  |
| 6 | 743.3909 | 726.3643 | 771.3858        | 754.3593 | <b>I</b> | 559.3450        | 542.3184  | <b>5</b>  |

|    |           |           |           |           |   |          |          |   |
|----|-----------|-----------|-----------|-----------|---|----------|----------|---|
| 7  | 872.4335  | 855.4069  | 900.4284  | 883.4019  | E | 446.2609 | 429.2344 | 4 |
| 8  | 929.4550  | 912.4284  | 957.4499  | 940.4233  | G | 317.2183 | 300.1918 | 3 |
| 9  | 1042.5390 | 1025.5125 | 1070.5339 | 1053.5074 | I | 260.1969 | 243.1703 | 2 |
| 10 |           |           |           |           | K | 147.1128 | 130.0863 | 1 |

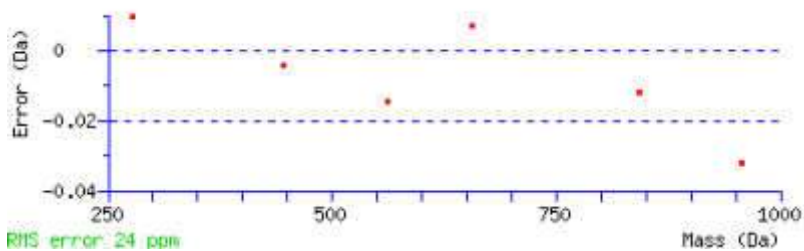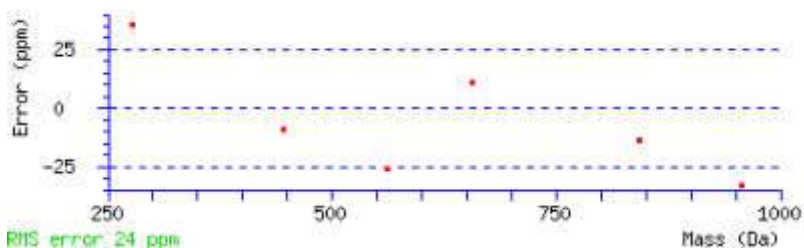

NCBI BLAST search of [MQVWPIEGIK](#)

(Parameters: blastp, nr protein database, expect=20000, no filter, PAM30)

Other BLAST [web gateways](#)

#### All matches to this query

| Score | Mr(calc)  | Delta   | Sequence                    |
|-------|-----------|---------|-----------------------------|
| 31.5  | 1215.6169 | 0.0040  | <a href="#">MNSILPGEDIK</a> |
| 26.8  | 1215.6360 | -0.0151 | <a href="#">GVFVRPDVDGR</a> |
| 20.4  | 1215.6652 | -0.0443 | <a href="#">FQVWPIEGIK</a>  |
| 20.4  | 1215.6322 | -0.0112 | <a href="#">MQVWPIEGIK</a>  |
| 20.4  | 1215.6322 | -0.0112 | <a href="#">MQVWPIEGIK</a>  |
| 20.3  | 1215.5965 | 0.0245  | <a href="#">MATASVRHMGR</a> |
| 19.0  | 1215.6533 | -0.0324 | <a href="#">QVALMIGEDIK</a> |
| 19.0  | 1215.6459 | -0.0250 | <a href="#">RLSDLAGEDLK</a> |
| 18.8  | 1215.5732 | 0.0478  | <a href="#">DLDLVQGEDGR</a> |
| 17.2  | 1215.6976 | -0.0766 | <a href="#">KVIYGLVPDGR</a> |

Mascot: <http://www.matrixscience.com/>

# MATRIX SCIENCE Mascot Search Results

## Peptide View **Spot no 4**

MS/MS Fragmentation of **VG FVYRENHR**

Found in **gi|671740** in **NCBI**nr, ribulose-bisphosphate carboxylase [synthetic construct]

Match to Query 54: 1275.644624 from(1276.651900,1+) intensity(0.0000) index(16)

Title: Label: J5, Spot\_Id: 219747, Peak\_List\_Id: 225842, MSMS Job\_Run\_Id: 21791, Comment:

Data file C:\Documents and Settings\Administrator\Desktop\farah BHU\spot set plate\Farah-Garima 11May 2013\ppw\_J5\_136842222100.txt

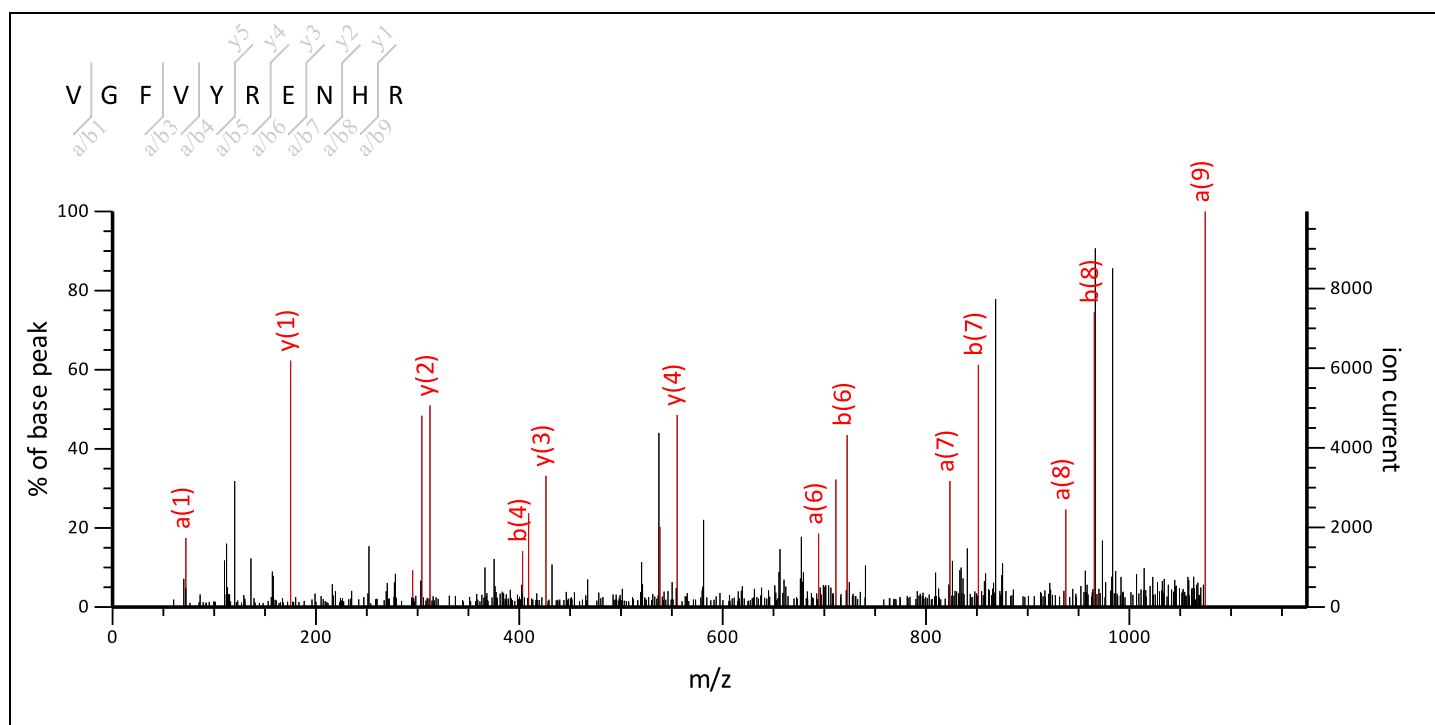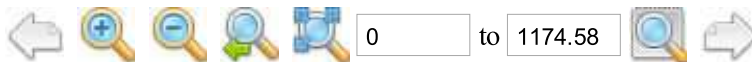

Label all possible matches  Label matches used for scoring

**Monoisotopic mass of neutral peptide Mr(calc):** 1275.6472

**Fixed modifications:** Carbamidomethyl (C) (apply to specified residues or termini only)

**Ions Score:** 36 **Expect:** 0.66

**Matches :** 20/44 fragment ions using 33 most intense peaks ([help](#))

| # | a               | a*       | b               | b*       | Seq.     | y               | y*              | #         |
|---|-----------------|----------|-----------------|----------|----------|-----------------|-----------------|-----------|
| 1 | <b>72.0808</b>  |          | 100.0757        |          | <b>V</b> |                 |                 | <b>10</b> |
| 2 | 129.1022        |          | 157.0972        |          | <b>G</b> | 1177.5861       | 1160.5596       | <b>9</b>  |
| 3 | 276.1707        |          | <b>304.1656</b> |          | <b>F</b> | 1120.5647       | 1103.5381       | <b>8</b>  |
| 4 | 375.2391        |          | <b>403.2340</b> |          | <b>V</b> | 973.4962        | 956.4697        | <b>7</b>  |
| 5 | <b>538.3024</b> |          | 566.2973        |          | <b>Y</b> | 874.4278        | 857.4013        | <b>6</b>  |
| 6 | <b>694.4035</b> | 677.3770 | <b>722.3984</b> | 705.3719 | <b>R</b> | <b>711.3645</b> | <b>694.3379</b> | <b>5</b>  |
| 7 | <b>823.4461</b> | 806.4196 | <b>851.4410</b> | 834.4145 | <b>E</b> | <b>555.2634</b> | <b>538.2368</b> | <b>4</b>  |
| 8 | <b>937.4890</b> | 920.4625 | <b>965.4839</b> | 948.4574 | <b>N</b> | <b>426.2208</b> | <b>409.1942</b> | <b>3</b>  |



|    |           |           |           |           |   |          |          |   |
|----|-----------|-----------|-----------|-----------|---|----------|----------|---|
| 9  | 1074.5479 | 1057.5214 | 1102.5429 | 1085.5163 | H | 312.1779 | 295.1513 | 2 |
| 10 |           |           |           |           | R | 175.1190 | 158.0924 | 1 |

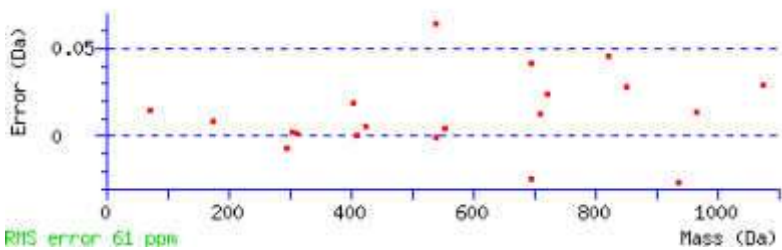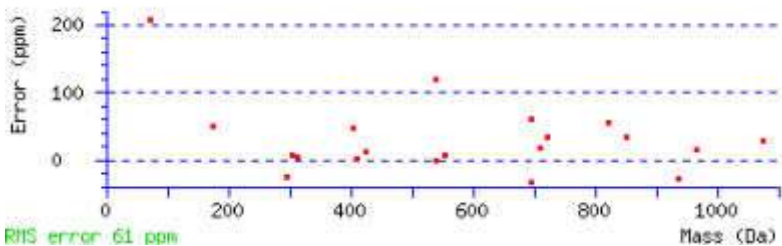

NCBI **BLAST** search of [VGFVYRENHR](#)

(Parameters: blastp, nr protein database, expect=20000, no filter, PAM30)

Other BLAST [web gateways](#)

#### All matches to this query

| Score | Mr(calc)  | Delta   | Sequence                     |
|-------|-----------|---------|------------------------------|
| 35.6  | 1275.6472 | -0.0026 | <a href="#">VGFVYRENHR</a>   |
| 23.6  | 1275.6221 | 0.0226  | <a href="#">HWRELENHR</a>    |
| 21.3  | 1275.6798 | -0.0352 | <a href="#">FYMITVPIHR</a>   |
| 21.0  | 1275.6472 | -0.0026 | <a href="#">GPSPSPAKGWHR</a> |
| 21.0  | 1275.5381 | 0.1066  | <a href="#">WYSGNNENHR</a>   |
| 18.7  | 1275.6545 | -0.0098 | <a href="#">GRPTRGPQDHR</a>  |
| 16.7  | 1275.5732 | 0.0715  | <a href="#">YDDDGLAPPGTR</a> |
| 16.7  | 1275.6823 | -0.0377 | <a href="#">LPTNEIFSSLR</a>  |
| 14.7  | 1275.6432 | 0.0014  | <a href="#">NKPPRENHER</a>   |
| 14.7  | 1275.6255 | 0.0192  | <a href="#">CRPGGAPATPHR</a> |

Mascot: <http://www.matrixscience.com/>



# Mascot Search Results

## Peptide View **Spot no 8**

MS/MS Fragmentation of **SPGYDGR**

Found in **gi|56966763** in **NCBI**nr, Chain S, Crystal Structure Of Activated Rice Rubisco Complexed With 2- Carboxyarabinito-1,5- Bisphosphate

Match to Query 23: 913.473924 from(914.481200,1+) intensity(0.0000) index(1)

Title: Label: N9, Spot\_Id: 219815, Peak\_List\_Id: 227090, MSMS Job\_Run\_Id: 21951, Comment:

Data file C:\Documents and Settings\Administrator\Desktop\Farah-Garima 11May 2013\ppw\_N9\_136868212700.txt

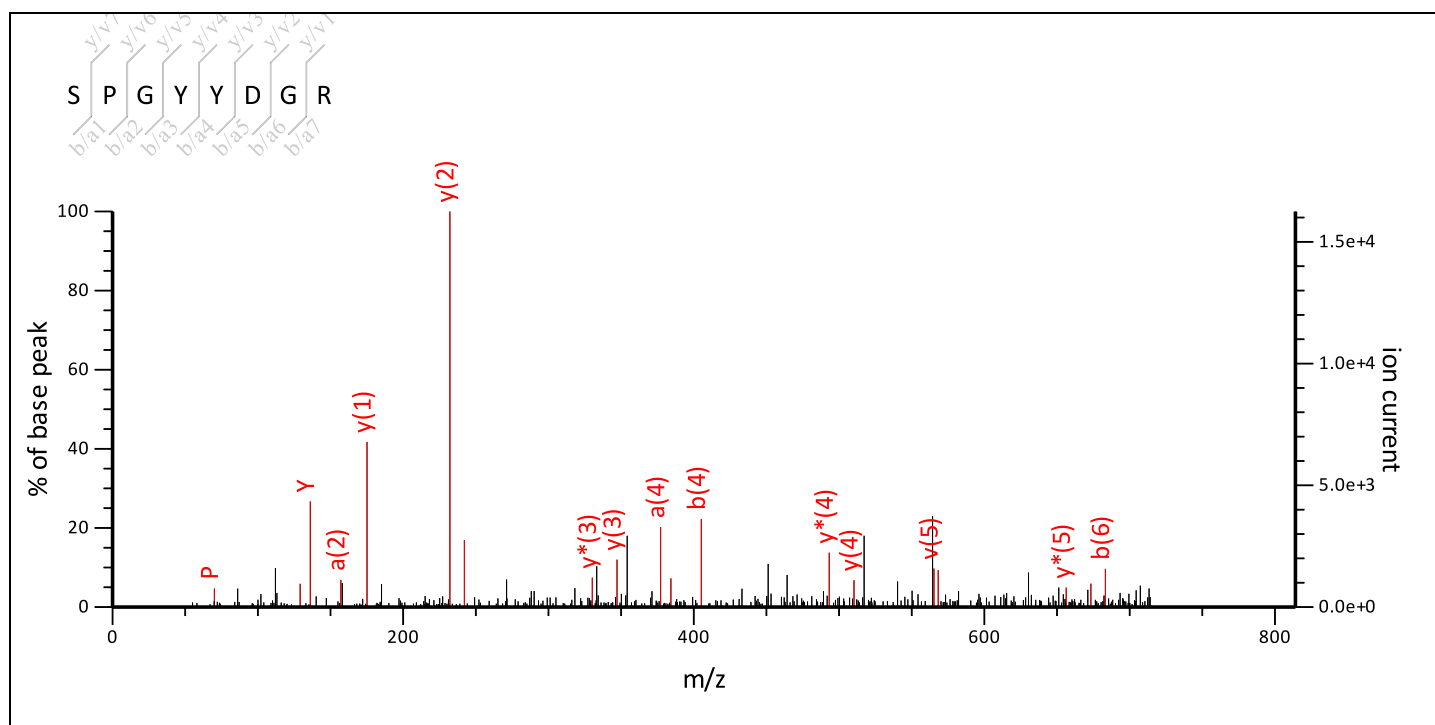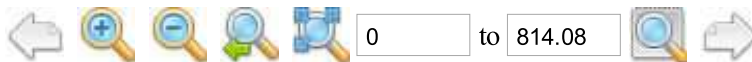

Label all possible matches  Label matches used for scoring

**Monoisotopic mass of neutral peptide Mr(calc):** 913.3930

**Fixed modifications:** Carbamidomethyl (C) (apply to specified residues or termini only)

**Ions Score:** 33 **Expect:** 22

**Matches :** 22/96 fragment ions using 28 most intense peaks ([help](#))

| # | Immon.   | a        | a <sup>0</sup> | b        | b <sup>0</sup> | d        | Seq. | v        | w        | y        | y*       | y <sup>0</sup> | # |
|---|----------|----------|----------------|----------|----------------|----------|------|----------|----------|----------|----------|----------------|---|
| 1 | 60.0444  | 60.0444  | 42.0338        | 88.0393  | 70.0287        | 44.0495  | S    |          |          |          |          |                | 8 |
| 2 | 70.0651  | 157.0972 | 139.0866       | 185.0921 | 167.0815       | 131.0815 | P    | 785.3213 | 784.3260 | 827.3682 | 810.3417 | 809.3577       | 7 |
| 3 | 30.0338  | 214.1186 | 196.1081       | 242.1135 | 224.1030       |          | G    |          |          | 730.3155 | 713.2889 | 712.3049       | 6 |
| 4 | 136.0757 | 377.1819 | 359.1714       | 405.1769 | 387.1663       |          | Y    | 565.2365 |          | 673.2940 | 656.2675 | 655.2835       | 5 |
| 5 | 136.0757 | 540.2453 | 522.2347       | 568.2402 | 550.2296       |          | Y    | 402.1732 |          | 510.2307 | 493.2041 | 492.2201       | 4 |
| 6 | 88.0393  | 655.2722 | 637.2617       | 683.2671 | 665.2566       | 611.2824 | D    | 287.1462 | 286.1510 | 347.1674 | 330.1408 | 329.1568       | 3 |
| 7 | 30.0338  | 712.2937 | 694.2831       | 740.2886 | 722.2780       |          | G    |          |          | 232.1404 | 215.1139 |                | 2 |

|   |          |  |  |  |  |   |         |         |          |          |   |
|---|----------|--|--|--|--|---|---------|---------|----------|----------|---|
| 8 | 129.1135 |  |  |  |  | R | 74.0237 | 73.0284 | 175.1190 | 158.0924 | 1 |
|---|----------|--|--|--|--|---|---------|---------|----------|----------|---|

| Seq   | ya       | yb       | Seq    | ya       | yb       | Seq   | ya       | yb       |
|-------|----------|----------|--------|----------|----------|-------|----------|----------|
| PG    | 127.0866 | 155.0815 | PGY    | 290.1499 | 318.1448 | PGYY  | 453.2132 | 481.2082 |
| PGYYD | 568.2402 | 596.2351 | PGYYDG | 625.2617 | 653.2566 | GY    | 193.0972 | 221.0921 |
| GYY   | 356.1605 | 384.1554 | GYYD   | 471.1874 | 499.1823 | GYYDG | 528.2089 | 556.2038 |
| YY    | 299.1390 | 327.1339 | YYD    | 414.1660 | 442.1609 | YYDG  | 471.1874 | 499.1823 |
| YD    | 251.1026 | 279.0975 | YDG    | 308.1241 | 336.1190 | DG    | 145.0608 | 173.0557 |

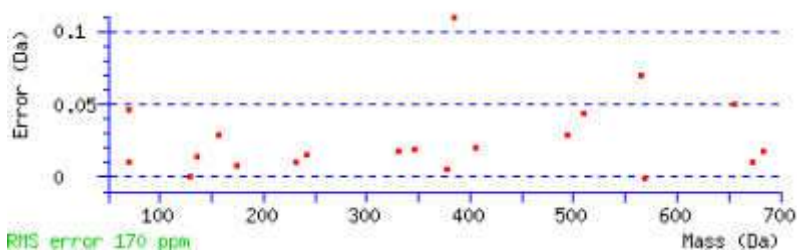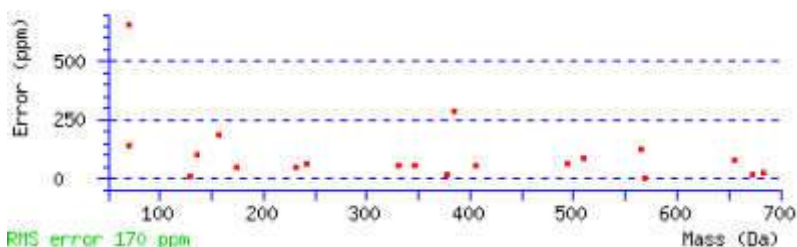

NCBI BLAST search of [SPGYDGR](#)

(Parameters: blastp, nr protein database, expect=20000, no filter, PAM30)

Other BLAST [web gateways](#)

#### All matches to this query

| Score | Mr(calc) | Delta   | Sequence                  |
|-------|----------|---------|---------------------------|
| 33.7  | 913.4294 | 0.0446  | <a href="#">QLYYDGR</a>   |
| 32.9  | 913.3930 | 0.0809  | <a href="#">SPGYDGR</a>   |
| 32.9  | 913.3930 | 0.0809  | <a href="#">SPGYDGR</a>   |
| 32.3  | 913.3964 | 0.0776  | <a href="#">DYATMTGR</a>  |
| 32.2  | 913.4294 | 0.0446  | <a href="#">GAIYYDGR</a>  |
| 30.1  | 913.5094 | -0.0354 | <a href="#">SPGRLATGR</a> |
| 29.3  | 913.5094 | -0.0354 | <a href="#">QIRAVDGR</a>  |
| 28.3  | 913.4981 | -0.0242 | <a href="#">QLGVSPTGR</a> |
| 27.3  | 913.3964 | 0.0776  | <a href="#">YMSLGDGR</a>  |
| 26.7  | 913.5094 | -0.0354 | <a href="#">AVARAVDGR</a> |

Mascot: <http://www.matrixscience.com/>


**Mascot Search Results**
**Peptide View Spot no 8**
MS/MS Fragmentation of **IIGFDNV**Found in **gi|56966763** in **NCBI**nr, Chain S, Crystal Structure Of Activated Rice Rubisco Complexed With 2- Carboxyarabinitol-1,5-Bisphosphate

Match to Query 33: 932.585134 from(933.592410,1+) intensity(0.0000) index(2)

Title: Label: N9, Spot\_Id: 219815, Peak\_List\_Id: 227087, MSMS Job\_Run\_Id: 21951, Comment:

Data file C:\Documents and Settings\Administrator\Desktop\Farah-Garima 11May 2013\ppw\_N9\_136868212700.txt

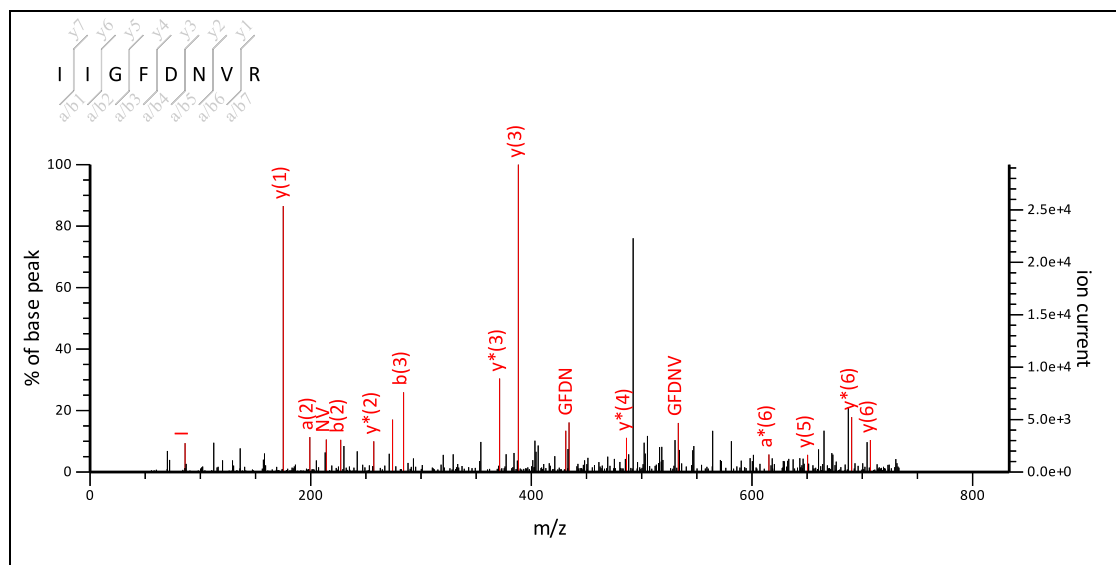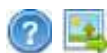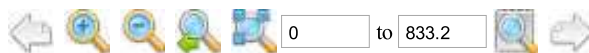Label all possible matches  Label matches used for scoring 

Monoisotopic mass of neutral peptide Mr(calc): 932.5080

Fixed modifications: Carbamidomethyl (C) (apply to specified residues or termini only)

Ions Score: 32 Expect: 13

Matches : 21/98 fragment ions using 28 most intense peaks ([help](#))

| # | Immon.   | a        | a*       | a <sup>0</sup> | b        | b*       | b <sup>0</sup> | d        | d'       | Seq. | v        | w        | w'       | y        | y*       | y <sup>0</sup> | # |
|---|----------|----------|----------|----------------|----------|----------|----------------|----------|----------|------|----------|----------|----------|----------|----------|----------------|---|
| 1 | 86.0964  | 86.0964  |          |                | 114.0913 |          |                | 44.0495  |          | I    |          |          |          |          |          |                | 8 |
| 2 | 86.0964  | 199.1805 |          |                | 227.1754 |          |                | 171.1492 | 185.1648 | I    | 762.3529 | 775.3733 | 789.3890 | 820.4312 | 803.4046 | 802.4206       | 7 |
| 3 | 30.0338  | 256.2020 |          |                | 284.1969 |          |                |          |          | G    |          |          |          | 707.3471 | 690.3206 | 689.3365       | 6 |
| 4 | 120.0808 | 403.2704 |          |                | 431.2653 |          |                |          |          | F    | 558.2630 |          |          | 650.3256 | 633.2991 | 632.3151       | 5 |
| 5 | 88.0393  | 518.2973 |          | 500.2867       | 546.2922 |          | 528.2817       | 474.3075 |          | D    | 443.2361 | 442.2409 |          | 503.2572 | 486.2307 | 485.2467       | 4 |
| 6 | 87.0553  | 632.3402 | 615.3137 | 614.3297       | 660.3352 | 643.3086 | 642.3246       | 589.3344 |          | N    | 329.1932 | 328.1979 |          | 388.2303 | 371.2037 |                | 3 |
| 7 | 72.0808  | 731.4087 | 714.3821 | 713.3981       | 759.4036 | 742.3770 | 741.3930       | 717.3930 |          | V    | 230.1248 | 243.1452 |          | 274.1874 | 257.1608 |                | 2 |
| 8 | 129.1135 |          |          |                |          |          |                |          |          | R    | 74.0237  | 73.0284  |          | 175.1190 | 158.0924 |                | 1 |

| Seq   | ya       | yb       | Seq    | ya       | yb       | Seq   | ya       | yb       |
|-------|----------|----------|--------|----------|----------|-------|----------|----------|
| IG    | 143.1179 | 171.1128 | IGF    | 290.1863 | 318.1812 | IGFD  | 405.2132 | 433.2082 |
| IGFDN | 519.2562 | 547.2511 | IGFDNV | 618.3246 | 646.3195 | GF    | 177.1022 | 205.0972 |
| GFD   | 292.1292 | 320.1241 | GFDN   | 406.1721 | 434.1670 | GFDNV | 505.2405 | 533.2354 |
| FD    | 235.1077 | 263.1026 | FDN    | 349.1506 | 377.1456 | FDNV  | 448.2191 | 476.2140 |
| DN    | 202.0822 | 230.0771 | DNV    | 301.1506 | 329.1456 | NV    | 186.1237 | 214.1186 |

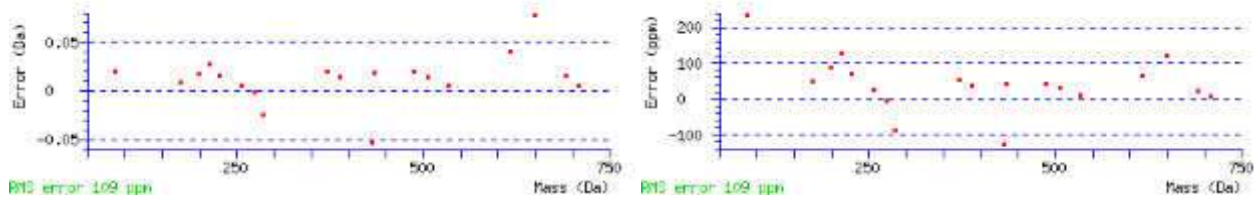

NCBI **BLAST** search of [IIGFDNVR](#)

(Parameters: blastp, nr protein database, expect=20000, no filter, PAM30)

Other BLAST [web gateways](#)

**All matches to this query**

| Score | Mr(calc) | Delta  | Sequence                  |
|-------|----------|--------|---------------------------|
| 32.5  | 932.5080 | 0.0772 | <a href="#">IIGFDNVR</a>  |
| 30.2  | 932.5444 | 0.0408 | <a href="#">VGTEGAILR</a> |
| 26.7  | 932.5807 | 0.0044 | <a href="#">KTFGVLLR</a>  |
| 26.6  | 932.5113 | 0.0738 | <a href="#">LLGSMVASR</a> |
| 26.0  | 932.5807 | 0.0044 | <a href="#">TKFGVLLR</a>  |
| 25.0  | 932.4927 | 0.0924 | <a href="#">ILGDITSAR</a> |
| 24.7  | 932.5080 | 0.0772 | <a href="#">LPTSFNVR</a>  |
| 24.4  | 932.5556 | 0.0296 | <a href="#">RTEGALLR</a>  |
| 24.0  | 932.5444 | 0.0408 | <a href="#">AGFTGVLLR</a> |
| 23.9  | 932.5113 | 0.0738 | <a href="#">LIGMSGALR</a> |

Mascot: <http://www.matrixscience.com/>



# Mascot Search Results

## Peptide View **Spot no 8**

### MS/MS Fragmentation of **KAYPDAFVR**

Found in **gi|56966763** in **NCBI**nr, Chain S, Crystal Structure Of Activated Rice Rubisco Complexed With 2- Carboxyarabinitol-1,5-Bisphosphate

Match to Query 91: 1065.665124 from(1066.672400,1+) intensity(0.0000) index(9)

Title: Label: N9, Spot\_Id: 219815, Peak\_List\_Id: 227091, MSMS Job\_Run\_Id: 21951, Comment:

Data file C:\Documents and Settings\Administrator\Desktop\Farah-Garima 11May 2013\ppw\_N9\_136868212700.txt

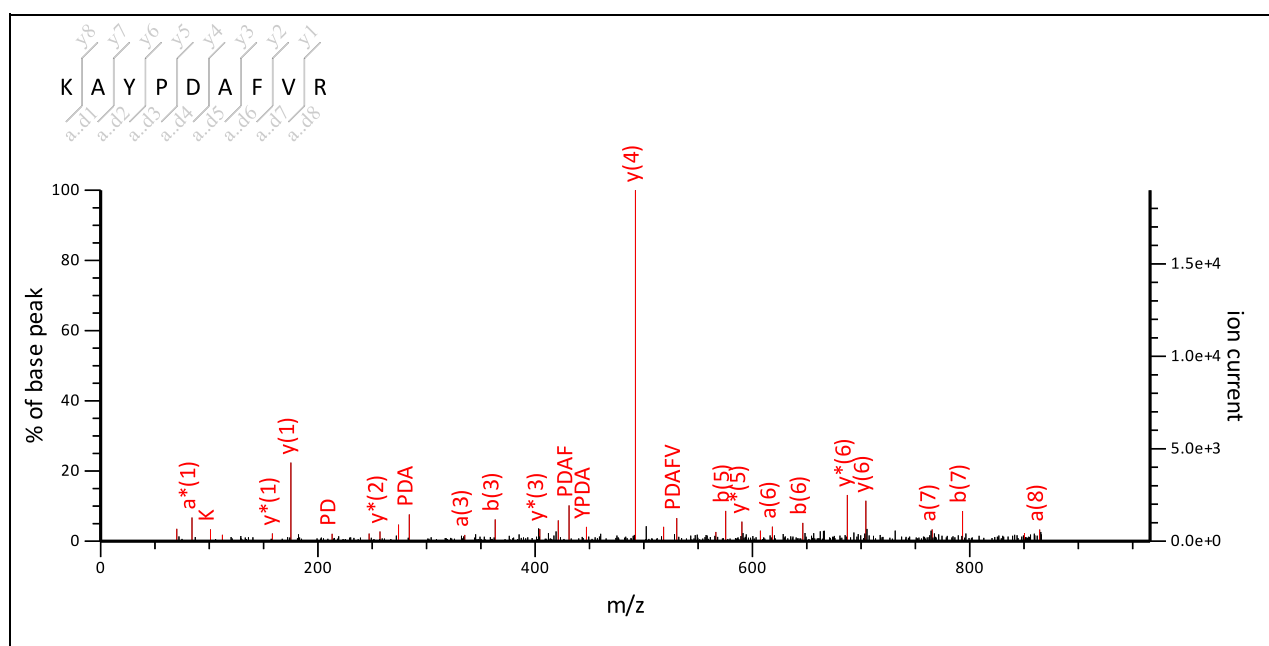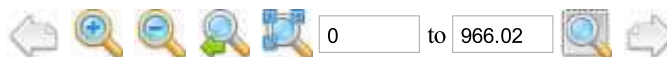

Label all possible matches  Label matches used for scoring

**Monoisotopic mass of neutral peptide Mr(calc):** 1065.5607

**Fixed modifications:** Carbamidomethyl (C) (apply to specified residues or termini only)

**Ions Score:** 51 **Expect:** 0.13

**Matches:** 38/125 fragment ions using 40 most intense peaks ([help](#))

| # | Immon.   | a        | a*       | a <sup>0</sup> | b        | b*       | b <sup>0</sup> | d        | Seq. | v        | w        | y        | y*       | y <sup>0</sup> | # |
|---|----------|----------|----------|----------------|----------|----------|----------------|----------|------|----------|----------|----------|----------|----------------|---|
| 1 | 101.1073 | 101.1073 | 84.0808  |                | 129.1022 | 112.0757 |                | 44.0495  | K    |          |          |          |          |                | 9 |
| 2 | 44.0495  | 172.1444 | 155.1179 |                | 200.1394 | 183.1128 |                |          | A    | 922.4417 |          | 938.4730 | 921.4465 | 920.4625       | 8 |
| 3 | 136.0757 | 335.2078 | 318.1812 |                | 363.2027 | 346.1761 |                |          | Y    | 759.3784 |          | 867.4359 | 850.4094 | 849.4254       | 7 |
| 4 | 70.0651  | 432.2605 | 415.2340 |                | 460.2554 | 443.2289 |                | 406.2449 | P    | 662.3257 | 661.3304 | 704.3726 | 687.3461 | 686.3620       | 6 |
| 5 | 88.0393  | 547.2875 | 530.2609 | 529.2769       | 575.2824 | 558.2558 | 557.2718       | 503.2976 | D    | 547.2987 | 546.3035 | 607.3198 | 590.2933 | 589.3093       | 5 |
| 6 | 44.0495  | 618.3246 | 601.2980 | 600.3140       | 646.3195 | 629.2930 | 628.3089       |          | A    | 476.2616 |          | 492.2929 | 475.2663 |                | 4 |
| 7 | 120.0808 | 765.3930 | 748.3665 | 747.3824       | 793.3879 | 776.3614 | 775.3774       |          | F    | 329.1932 |          | 421.2558 | 404.2292 |                | 3 |
| 8 | 72.0808  | 864.4614 | 847.4349 | 846.4509       | 892.4563 | 875.4298 | 874.4458       | 850.4458 | V    | 230.1248 | 243.1452 | 274.1874 | 257.1608 |                | 2 |
| 9 | 129.1135 |          |          |                |          |          |                |          | R    | 74.0237  | 73.0284  | 175.1190 | 158.0924 |                | 1 |

| Seq   | ya       | yb       | Seq    | ya       | yb       | Seq   | ya       | yb       |
|-------|----------|----------|--------|----------|----------|-------|----------|----------|
| AY    | 207.1128 | 235.1077 | AYP    | 304.1656 | 332.1605 | AYPD  | 419.1925 | 447.1874 |
| AYPDA | 490.2296 | 518.2245 | AYPDAF | 637.2980 | 665.2930 | YP    | 233.1285 | 261.1234 |
| YPD   | 348.1554 | 376.1503 | YPDA   | 419.1925 | 447.1874 | YPDAF | 566.2609 | 594.2558 |

|               |                 |                 |              |                 |                 |            |          |                 |
|---------------|-----------------|-----------------|--------------|-----------------|-----------------|------------|----------|-----------------|
| <b>YPDAFV</b> | 665.3293        | 693.3243        | <b>PD</b>    | 185.0921        | <b>213.0870</b> | <b>PDA</b> | 256.1292 | <b>284.1241</b> |
| <b>PDAF</b>   | <b>403.1976</b> | <b>431.1925</b> | <b>PDAFV</b> | <b>502.2660</b> | <b>530.2609</b> | <b>DA</b>  | 159.0764 | 187.0713        |
| <b>DAF</b>    | 306.1448        | 334.1397        | <b>DAFV</b>  | 405.2132        | 433.2082        | <b>AF</b>  | 191.1179 | 219.1128        |
| <b>AFV</b>    | 290.1863        | 318.1812        | <b>FV</b>    | 219.1492        | <b>247.1441</b> |            |          |                 |

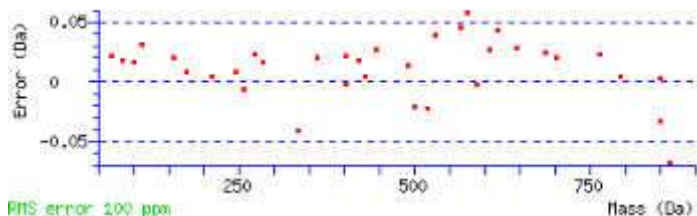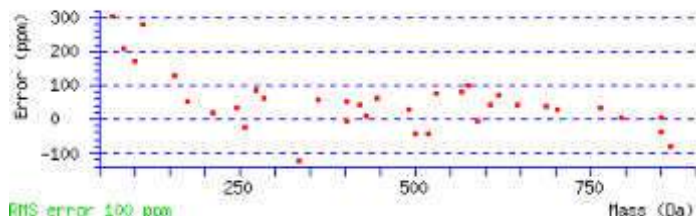

NCBI **BLAST** search of [KAYPDAFVR](#)

(Parameters: blastp, nr protein database, expect=20000, no filter, PAM30)

Other BLAST [web gateways](#)

#### All matches to this query

| Score | Mr(calc)  | Delta  | Sequence                  |
|-------|-----------|--------|---------------------------|
| 50.6  | 1065.5607 | 0.1044 | <a href="#">KAYPDAFVR</a> |
| 34.9  | 1065.5641 | 0.1010 | <a href="#">KYVSPAMVR</a> |
| 34.3  | 1065.5607 | 0.1044 | <a href="#">QSEPVSEVR</a> |
| 32.6  | 1065.5641 | 0.1010 | <a href="#">MVISQVFAR</a> |
| 31.7  | 1065.5641 | 0.1010 | <a href="#">MVLQSVFAR</a> |
| 30.9  | 1065.5641 | 0.1010 | <a href="#">MEAFVKAVR</a> |
| 30.6  | 1065.5753 | 0.0898 | <a href="#">AFLSRAMVR</a> |
| 29.4  | 1065.5641 | 0.1010 | <a href="#">KEFAVMAVR</a> |
| 29.2  | 1065.5971 | 0.0680 | <a href="#">KAIFDAFVR</a> |
| 28.1  | 1065.5607 | 0.1044 | <a href="#">FKSFDPAVR</a> |

Mascot: <http://www.matrixscience.com/>





# Mascot Search Results

## Peptide View **Spot no 8**

MS/MS Fragmentation of **AYPDAFVR**

Found in **gi|56966763** in **NCBI**nr, Chain S, Crystal Structure Of Activated Rice Rubisco Complexed With 2- Carboxyarabinitol-1,5-Bisphosphate

Match to Query 35: 937.542044 from(938.549320,1+) intensity(0.0000) index(3)

Title: Label: N9, Spot\_Id: 219815, Peak\_List\_Id: 227089, MSMS Job\_Run\_Id: 21951, Comment:

Data file C:\Documents and Settings\Administrator\Desktop\Farah-Garima 11May 2013\ppw\_N9\_136868212700.txt

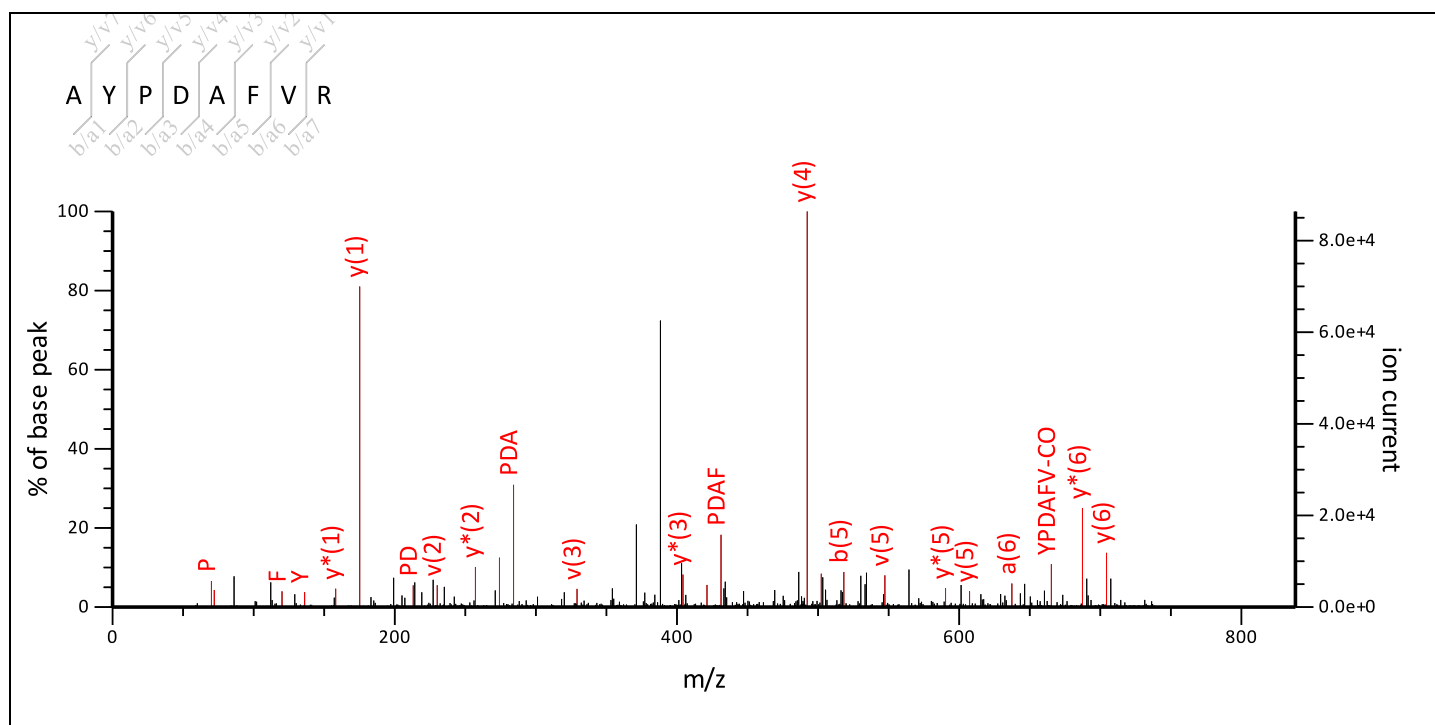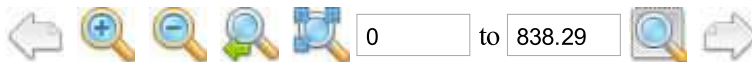

Label all possible matches  Label matches used for scoring

**Monoisotopic mass of neutral peptide Mr(calc):** 937.4658

**Fixed modifications:** Carbamidomethyl (C) (apply to specified residues or termini only)

**Ions Score:** 33 **Expect:** 14

**Matches :** 29/92 fragment ions using 49 most intense peaks ([help](#))

| # | Immon.          | a               | a <sup>0</sup> | b               | b <sup>0</sup> | d        | Seq. | v               | w        | y               | y <sup>*</sup>  | y <sup>0</sup> | # |
|---|-----------------|-----------------|----------------|-----------------|----------------|----------|------|-----------------|----------|-----------------|-----------------|----------------|---|
| 1 | 44.0495         | 44.0495         |                | <b>72.0444</b>  |                | 44.0495  | A    |                 |          |                 |                 |                | 8 |
| 2 | <b>136.0757</b> | 207.1128        |                | 235.1077        |                |          | Y    | 759.3784        |          | 867.4359        | 850.4094        | 849.4254       | 7 |
| 3 | <b>70.0651</b>  | 304.1656        |                | 332.1605        |                | 278.1499 | P    | 662.3257        | 661.3304 | <b>704.3726</b> | <b>687.3461</b> | 686.3620       | 6 |
| 4 | 88.0393         | 419.1925        | 401.1819       | 447.1874        | 429.1769       | 375.2027 | D    | <b>547.2987</b> | 546.3035 | <b>607.3198</b> | <b>590.2933</b> | 589.3093       | 5 |
| 5 | 44.0495         | 490.2296        | 472.2191       | <b>518.2245</b> | 500.2140       |          | A    | 476.2616        |          | <b>492.2929</b> | 475.2663        |                | 4 |
| 6 | <b>120.0808</b> | <b>637.2980</b> | 619.2875       | <b>665.2930</b> | 647.2824       |          | F    | <b>329.1932</b> |          | <b>421.2558</b> | <b>404.2292</b> |                | 3 |
| 7 | <b>72.0808</b>  | 736.3665        | 718.3559       | 764.3614        | 746.3508       | 722.3508 | V    | <b>230.1248</b> | 243.1452 | <b>274.1874</b> | <b>257.1608</b> |                | 2 |

|   |          |  |  |  |  |   |         |         |          |          |   |
|---|----------|--|--|--|--|---|---------|---------|----------|----------|---|
| 8 | 129.1135 |  |  |  |  | R | 74.0237 | 73.0284 | 175.1190 | 158.0924 | 1 |
|---|----------|--|--|--|--|---|---------|---------|----------|----------|---|

| Seq   | ya       | yb       | Seq    | ya       | yb       | Seq   | ya       | yb       |
|-------|----------|----------|--------|----------|----------|-------|----------|----------|
| YP    | 233.1285 | 261.1234 | YPD    | 348.1554 | 376.1503 | YPDA  | 419.1925 | 447.1874 |
| YPDAF | 566.2609 | 594.2558 | YPDAFV | 665.3293 | 693.3243 | PD    | 185.0921 | 213.0870 |
| PDA   | 256.1292 | 284.1241 | PDAF   | 403.1976 | 431.1925 | PDAFV | 502.2660 | 530.2609 |
| DA    | 159.0764 | 187.0713 | DAF    | 306.1448 | 334.1397 | DAFV  | 405.2132 | 433.2082 |
| AF    | 191.1179 | 219.1128 | AFV    | 290.1863 | 318.1812 | FV    | 219.1492 | 247.1441 |

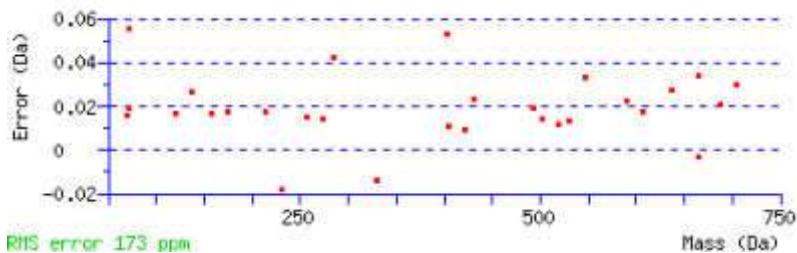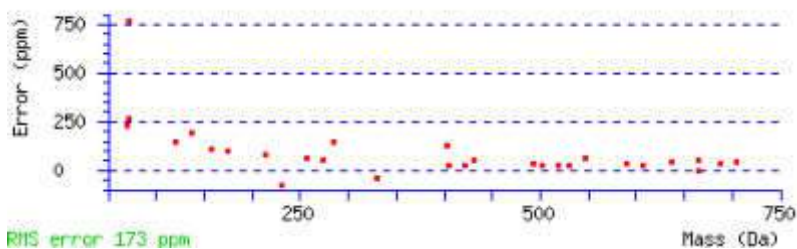

NCBI BLAST search of [AYPDAFVR](#)

(Parameters: blastp, nr protein database, expect=20000, no filter, PAM30)

Other BLAST [web gateways](#)

#### All matches to this query

| Score | Mr(calc) | Delta  | Sequence                 |
|-------|----------|--------|--------------------------|
| 32.7  | 937.4658 | 0.0763 | <a href="#">AYPDAFVR</a> |
| 25.9  | 937.5134 | 0.0287 | <a href="#">HPIGYPVR</a> |
| 25.5  | 937.5385 | 0.0035 | <a href="#">YALLGFVR</a> |
| 25.4  | 937.4658 | 0.0763 | <a href="#">YAEGFPVR</a> |
| 25.2  | 937.5168 | 0.0253 | <a href="#">HPAMIVVR</a> |
| 25.2  | 937.5168 | 0.0253 | <a href="#">HPAMVIVR</a> |
| 25.2  | 937.5168 | 0.0253 | <a href="#">HPSMVIVR</a> |
| 25.0  | 937.4617 | 0.0803 | <a href="#">LSDHDPVR</a> |
| 25.0  | 937.4617 | 0.0803 | <a href="#">SLDHDPVR</a> |
| 24.8  | 937.5055 | 0.0365 | <a href="#">SFVLAMVR</a> |

Mascot: <http://www.matrixscience.com/>


**Mascot Search Results**
**Peptide View Spot no 8**
MS/MS Fragmentation of **MQVWPIEGIK**Found in **gi56966763** in **NCBI**nr, Chain S, Crystal Structure Of Activated Rice Rubisco Complexed With 2- Carboxyarabinitol-1,5-Bisphosphate

Match to Query 125: 1199.741024 from(1200.748300,1+) intensity(0.0000) index(13)

Title: Label: N9, Spot\_Id: 219815, Peak\_List\_Id: 227093, MSMS Job\_Run\_Id: 21951, Comment:

Data file C:\Documents and Settings\Administrator\Desktop\Farah-Garima 11May 2013\ppw\_N9\_136868212700.txt

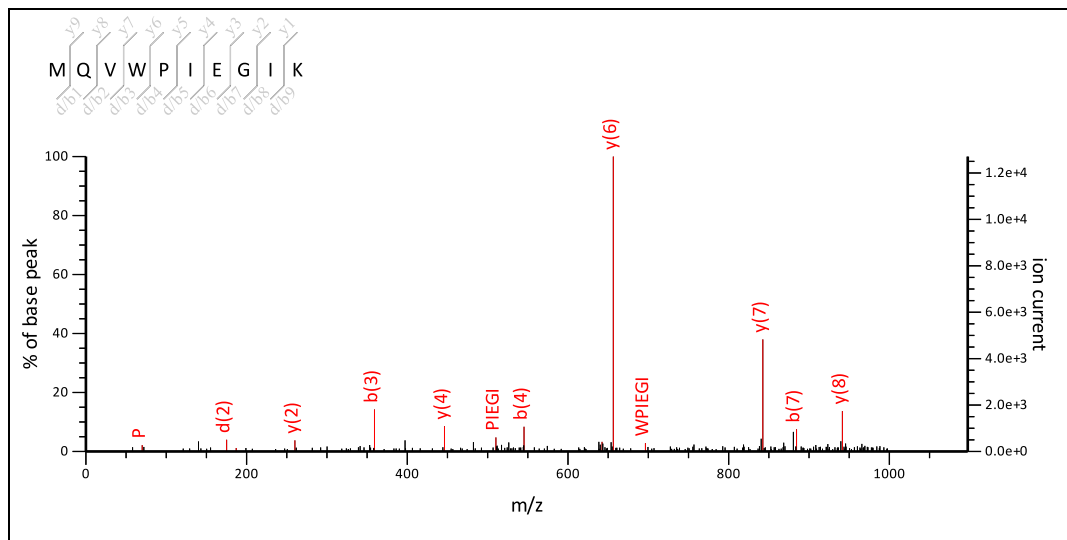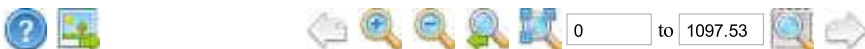Label all possible matches  Label matches used for scoring 

Monoisotopic mass of neutral peptide Mr(calc): 1199.6373

Fixed modifications: Carbamidomethyl (C) (apply to specified residues or termini only)

Ions Score: 46 Expect: 0.54

Matches : 16/148 fragment ions using 20 most intense peaks ([help](#))

| #  | Immon.         | a         | a*        | a <sup>0</sup> | b               | b*        | b <sup>0</sup> | d               | d'        | Seq. | v        | w        | w'       | y               | y*        | y <sup>0</sup> |
|----|----------------|-----------|-----------|----------------|-----------------|-----------|----------------|-----------------|-----------|------|----------|----------|----------|-----------------|-----------|----------------|
| 1  | 104.0528       | 104.0528  |           |                | 132.0478        |           |                | 44.0495         |           | M    |          |          |          |                 |           |                |
| 2  | 101.0709       | 232.1114  | 215.0849  |                | <b>260.1063</b> | 243.0798  |                | <b>175.0900</b> |           | Q    | 996.5513 | 995.5560 |          | 1069.6041       | 1052.5775 | 1051.5         |
| 3  | 72.0808        | 331.1798  | 314.1533  |                | <b>359.1748</b> | 342.1482  |                | 317.1642        |           | V    | 897.4829 | 910.5033 |          | <b>941.5455</b> | 924.5189  | 923.5          |
| 4  | 159.0917       | 517.2592  | 500.2326  |                | <b>545.2541</b> | 528.2275  |                |                 |           | W    | 711.4036 |          |          | <b>842.4771</b> | 825.4505  | 824.4          |
| 5  | <b>70.0651</b> | 614.3119  | 597.2854  |                | <b>642.3068</b> | 625.2803  |                | 588.2963        |           | P    | 614.3508 | 613.3556 |          | <b>656.3978</b> | 639.3712  | 638.3          |
| 6  | 86.0964        | 727.3960  | 710.3694  |                | 755.3909        | 738.3643  |                | 699.3647        | 713.3803  | I    | 501.2667 | 514.2871 | 528.3028 | 559.3450        | 542.3184  | 541.3          |
| 7  | 102.0550       | 856.4386  | 839.4120  | 838.4280       | <b>884.4335</b> | 867.4069  | 866.4229       | 798.4331        |           | E    | 372.2241 | 371.2289 |          | <b>446.2609</b> | 429.2344  | 428.2          |
| 8  | 30.0338        | 913.4600  | 896.4335  | 895.4495       | <b>941.4550</b> | 924.4284  | 923.4444       |                 |           | G    |          |          |          | 317.2183        | 300.1918  |                |
| 9  | 86.0964        | 1026.5441 | 1009.5176 | 1008.5335      | 1054.5390       | 1037.5125 | 1036.5285      | 998.5128        | 1012.5285 | I    | 202.1186 | 215.1390 | 229.1547 | <b>260.1969</b> | 243.1703  |                |
| 10 | 101.1073       |           |           |                |                 |           |                |                 |           | K    | 74.0237  | 73.0284  |          | 147.1128        | 130.0863  |                |

| Seq   | ya       | yb              | Seq    | ya       | yb              | Seq    | ya       | yb              |
|-------|----------|-----------------|--------|----------|-----------------|--------|----------|-----------------|
| QV    | 200.1394 | 228.1343        | QVW    | 386.2187 | 414.2136        | QVWP   | 483.2714 | 511.2663        |
| QVWPI | 596.3555 | 624.3504        | VW     | 258.1601 | 286.1550        | VWP    | 355.2129 | 383.2078        |
| VWPI  | 468.2969 | 496.2918        | VWPIE  | 597.3395 | 625.3344        | VWPIEG | 654.3610 | 682.3559        |
| WP    | 256.1444 | 284.1394        | WPI    | 369.2285 | 397.2234        | WPIE   | 498.2711 | 526.2660        |
| WPIEG | 555.2926 | 583.2875        | WPIEGI | 668.3766 | <b>696.3715</b> | PI     | 183.1492 | 211.1441        |
| PIE   | 312.1918 | 340.1867        | PIEG   | 369.2132 | 397.2082        | PIEGI  | 482.2973 | <b>510.2922</b> |
| IE    | 215.1390 | 243.1339        | IEG    | 272.1605 | 300.1554        | IEGI   | 385.2445 | 413.2395        |
| EG    | 159.0764 | <b>187.0713</b> | EGI    | 272.1605 | 300.1554        | GI     | 143.1179 | 171.1128        |

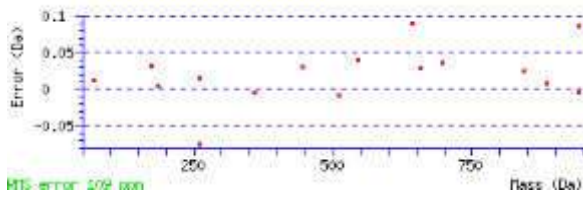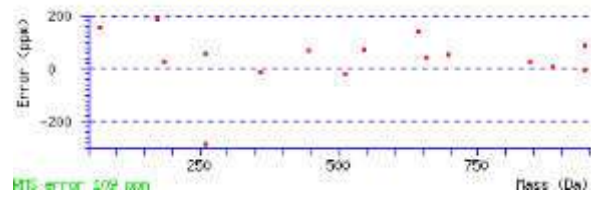

NCBI BLAST search of [MOVWPIEGIK](#)

(Parameters: blastp, nr protein database, expect=20000, no filter, PAM30)

Other BLAST [web gateways](#)

**All matches to this query**

| Score | Mr(calc)  | Delta  | Sequence                     |
|-------|-----------|--------|------------------------------|
| 46.2  | 1199.6373 | 0.1038 | <a href="#">MOVWPIEGIK</a>   |
| 46.2  | 1199.6373 | 0.1038 | <a href="#">MOVWPIEGIK</a>   |
| 43.4  | 1199.6761 | 0.0649 | <a href="#">ATSVAPEALTIK</a> |
| 40.8  | 1199.6696 | 0.0714 | <a href="#">MOVVSSPILAR</a>  |
| 40.7  | 1199.6398 | 0.1013 | <a href="#">VSDGSVPDIAIK</a> |
| 40.0  | 1199.6914 | 0.0496 | <a href="#">ASTVLSPWVLK</a>  |
| 37.2  | 1199.6874 | 0.0536 | <a href="#">TVTGSVPLLASR</a> |
| 32.7  | 1199.6220 | 0.1190 | <a href="#">AMGVPVEAELGK</a> |
| 31.7  | 1199.6696 | 0.0714 | <a href="#">LSVVCVPSALR</a>  |
| 30.7  | 1199.6332 | 0.1078 | <a href="#">EGVCVPLLASR</a>  |

Mascot: <http://www.matrixscience.com/>

**MATRIX SCIENCE Mascot Search Results**

**Peptide View Spot no 8**

MS/MS Fragmentation of **FQVWPIEGIK**

Found in **gi56966763** in **NCBI**nr, Chain S, Crystal Structure Of Activated Rice Rubisco Complexed With 2- Carboxyarabinitol-1,5-Bisphosphate

Match to Query 130: 1215.734924 from(1216.742200,1+) intensity(0.0000) index(14)

Title: Label: N9, Spot\_Id: 219815, Peak\_List\_Id: 227094, MSMS Job\_Run\_Id: 21951, Comment:

Data file C:\Documents and Settings\Administrator\Desktop\Farah-Garima 11May 2013\ppw\_N9\_136868212700.txt

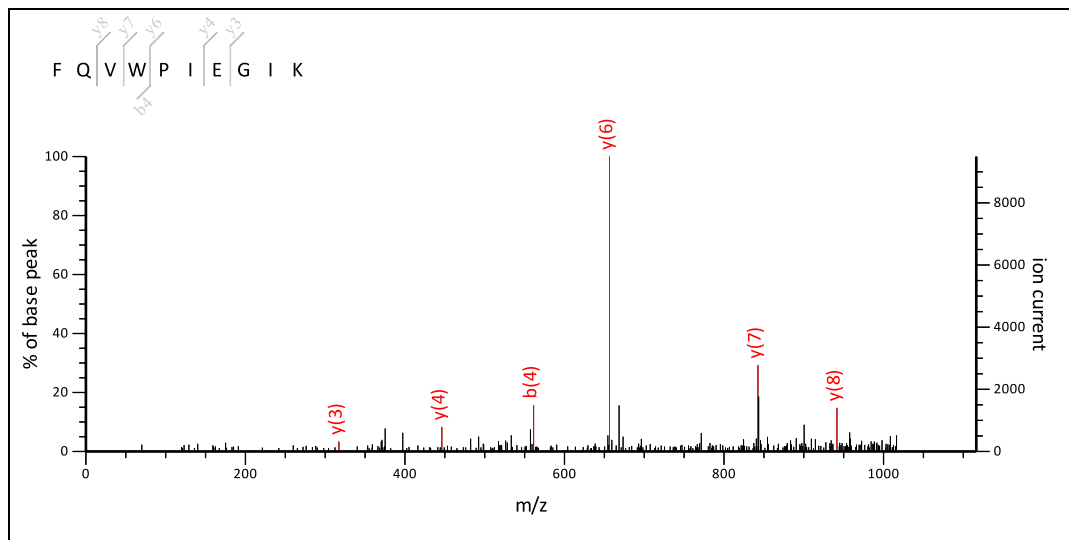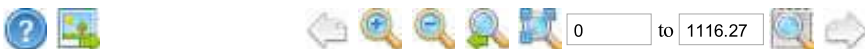

Label all possible matches  Label matches used for scoring

Monoisotopic mass of neutral peptide Mr(calc): 1215.6652

Fixed modifications: Carbamidomethyl (C) (apply to specified residues or termini only)

Ions Score: 33 Expect: 14

Matches : 6/148 fragment ions using 10 most intense peaks (help)

| #  | Immon.   | a         | a*        | a <sup>0</sup> | b         | b*        | b <sup>0</sup> | d         | d'        | Seq. | v        | w        | w'       | y         | y*        | y     |
|----|----------|-----------|-----------|----------------|-----------|-----------|----------------|-----------|-----------|------|----------|----------|----------|-----------|-----------|-------|
| 1  | 120.0808 | 120.0808  |           |                | 148.0757  |           |                | 44.0495   |           | F    |          |          |          |           |           |       |
| 2  | 101.0709 | 248.1394  | 231.1128  |                | 276.1343  | 259.1077  |                | 191.1179  |           | Q    | 996.5513 | 995.5560 |          | 1069.6041 | 1052.5775 | 1051. |
| 3  | 72.0808  | 347.2078  | 330.1812  |                | 375.2027  | 358.1761  |                | 333.1921  |           | V    | 897.4829 | 910.5033 |          | 941.5455  | 924.5189  | 923.  |
| 4  | 159.0917 | 533.2871  | 516.2605  |                | 561.2820  | 544.2554  |                |           |           | W    | 711.4036 |          |          | 842.4771  | 825.4505  | 824.  |
| 5  | 70.0651  | 630.3398  | 613.3133  |                | 658.3348  | 641.3082  |                | 604.3242  |           | P    | 614.3508 | 613.3556 |          | 656.3978  | 639.3712  | 638.  |
| 6  | 86.0964  | 743.4239  | 726.3974  |                | 771.4188  | 754.3923  |                | 715.3926  | 729.4083  | I    | 501.2667 | 514.2871 | 528.3028 | 559.3450  | 542.3184  | 541.  |
| 7  | 102.0550 | 872.4665  | 855.4400  | 854.4559       | 900.4614  | 883.4349  | 882.4509       | 814.4610  |           | E    | 372.2241 | 371.2289 |          | 446.2609  | 429.2344  | 428.  |
| 8  | 30.0338  | 929.4880  | 912.4614  | 911.4774       | 957.4829  | 940.4563  | 939.4723       |           |           | G    |          |          |          | 317.2183  | 300.1918  |       |
| 9  | 86.0964  | 1042.5720 | 1025.5455 | 1024.5615      | 1070.5669 | 1053.5404 | 1052.5564      | 1014.5407 | 1028.5564 | I    | 202.1186 | 215.1390 | 229.1547 | 260.1969  | 243.1703  |       |
| 10 | 101.1073 |           |           |                |           |           |                |           |           | K    | 74.0237  | 73.0284  |          | 147.1128  | 130.0863  |       |

| Seq   | ya       | yb       | Seq    | ya       | yb       | Seq    | ya       | yb       |
|-------|----------|----------|--------|----------|----------|--------|----------|----------|
| QV    | 200.1394 | 228.1343 | QVW    | 386.2187 | 414.2136 | QVWP   | 483.2714 | 511.2663 |
| QVWPI | 596.3555 | 624.3504 | VW     | 258.1601 | 286.1550 | VWP    | 355.2129 | 383.2078 |
| VWPI  | 468.2969 | 496.2918 | VWPIE  | 597.3395 | 625.3344 | VWPIEG | 654.3610 | 682.3559 |
| WP    | 256.1444 | 284.1394 | WPI    | 369.2285 | 397.2234 | WPIE   | 498.2711 | 526.2660 |
| WPIEG | 555.2926 | 583.2875 | WPIEGI | 668.3766 | 696.3715 | PI     | 183.1492 | 211.1441 |
| PIE   | 312.1918 | 340.1867 | PIEG   | 369.2132 | 397.2082 | PIEGI  | 482.2973 | 510.2922 |
| IE    | 215.1390 | 243.1339 | IEG    | 272.1605 | 300.1554 | IEGI   | 385.2445 | 413.2395 |
| EG    | 159.0764 | 187.0713 | EGI    | 272.1605 | 300.1554 | GI     | 143.1179 | 171.1128 |

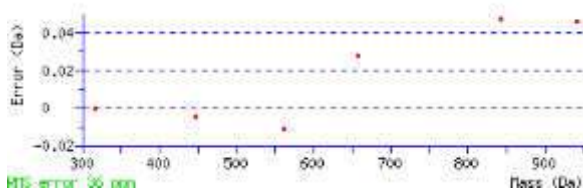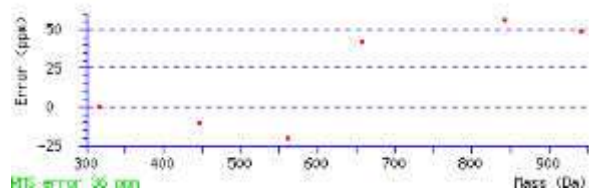

NCBI BLAST search of [FOVWPIEGIK](#)

(Parameters: blastp, nr protein database, expect=20000, no filter, PAM30)

Other BLAST [web gateways](#)

**All matches to this query**

| Score | Mr(calc)  | Delta  | Sequence                     |
|-------|-----------|--------|------------------------------|
| 32.7  | 1215.6652 | 0.0697 | <a href="#">FOVWPIEGIK</a>   |
| 32.7  | 1215.6322 | 0.1028 | <a href="#">MOVWPIEGIK</a>   |
| 32.7  | 1215.6322 | 0.1028 | <a href="#">MOVWPIEGIK</a>   |
| 29.6  | 1215.6281 | 0.1068 | <a href="#">MAALPTLTEGGR</a> |
| 29.6  | 1215.6506 | 0.0843 | <a href="#">KMGGRPGSLASR</a> |
| 28.5  | 1215.6459 | 0.0890 | <a href="#">TASDADLLALAR</a> |
| 26.8  | 1215.6281 | 0.1068 | <a href="#">TASGLMLPEAAR</a> |
| 26.5  | 1215.6281 | 0.1068 | <a href="#">GMAVTPREVEK</a>  |
| 25.5  | 1215.6645 | 0.0704 | <a href="#">MOVVSSPILAR</a>  |
| 25.5  | 1215.6758 | 0.0591 | <a href="#">AMGVVVKLGNGR</a> |

Mascot: <http://www.matrixscience.com/>

**MATRIX SCIENCE Mascot Search Results**

**Peptide View Spot no 8**

MS/MS Fragmentation of **MQVWPIEGIKK**

Found in **gi56966763** in **NCBIInr**, Chain S, Crystal Structure Of Activated Rice Rubisco Complexed With 2- Carboxyarabinitol-1,5-Bisphosphate

Match to Query 174: 1327.848024 from(1328.855300,1+) intensity(0.0000) index(19)

Title: Label N9, Spot\_Id: 219815, Peak\_List\_Id: 227107, MSMS Job\_Run\_Id: 21951, Comment:

Data file C:\Documents and Settings\Administrator\Desktop\Farah-Garima 11May 2013\ppw\_N9\_136868212700.txt

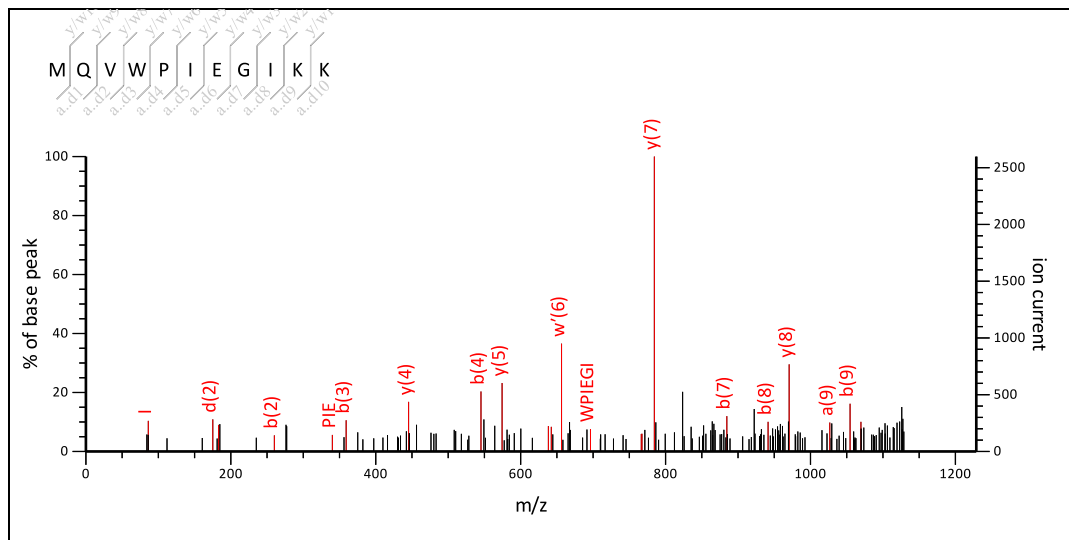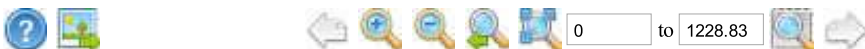

Label all possible matches  Label matches used for scoring

Monoisotopic mass of neutral peptide Mr(calc): 1327.7322

Fixed modifications: Carbamidomethyl (C) (apply to specified residues or termini only)

Ions Score: 27 Expect: 22

Matches : 24/170 fragment ions using 55 most intense peaks [\(help\)](#)

| #  | Immon.   | a         | a*        | a <sup>0</sup> | b         | b*        | b <sup>0</sup> | d         | d'        | Seq. | v         | w         | w'       | y         | y*        |
|----|----------|-----------|-----------|----------------|-----------|-----------|----------------|-----------|-----------|------|-----------|-----------|----------|-----------|-----------|
| 1  | 104.0528 | 104.0528  |           |                | 132.0478  |           |                | 44.0495   |           | M    |           |           |          |           |           |
| 2  | 101.0709 | 232.1114  | 215.0849  |                | 260.1063  | 243.0798  |                | 175.0900  |           | Q    | 1124.6463 | 1123.6510 |          | 1197.6990 | 1180.6725 |
| 3  | 72.0808  | 331.1798  | 314.1533  |                | 359.1748  | 342.1482  |                | 317.1642  |           | V    | 1025.5778 | 1038.5982 |          | 1069.6404 | 1052.6139 |
| 4  | 159.0917 | 517.2592  | 500.2326  |                | 545.2541  | 528.2275  |                |           |           | W    | 839.4985  |           |          | 970.5720  | 953.5455  |
| 5  | 70.0651  | 614.3119  | 597.2854  |                | 642.3068  | 625.2803  |                | 588.2963  |           | P    | 742.4458  | 741.4505  |          | 784.4927  | 767.4662  |
| 6  | 86.0964  | 727.3960  | 710.3694  |                | 755.3909  | 738.3643  |                | 699.3647  | 713.3803  | I    | 629.3617  | 642.3821  | 656.3978 | 687.4400  | 670.4134  |
| 7  | 102.0550 | 856.4386  | 839.4120  | 838.4280       | 884.4335  | 867.4069  | 866.4229       | 798.4331  |           | E    | 500.3191  | 499.3239  |          | 574.3559  | 557.3293  |
| 8  | 30.0338  | 913.4600  | 896.4335  | 895.4495       | 941.4550  | 924.4284  | 923.4444       |           |           | G    |           |           |          | 445.3133  | 428.2867  |
| 9  | 86.0964  | 1026.5441 | 1009.5176 | 1008.5335      | 1054.5390 | 1037.5125 | 1036.5285      | 998.5128  | 1012.5285 | I    | 330.2136  | 343.2340  | 357.2496 | 388.2918  | 371.2653  |
| 10 | 101.1073 | 1154.6391 | 1137.6125 | 1136.6285      | 1182.6340 | 1165.6074 | 1164.6234      | 1097.5812 |           | K    | 202.1186  | 201.1234  |          | 275.2078  | 258.1812  |
| 11 | 101.1073 |           |           |                |           |           |                |           |           | K    | 74.0237   | 73.0284   |          | 147.1128  | 130.0863  |

| Seq    | ya       | yb       | Seq    | ya       | yb       | Seq    | ya       | yb       |
|--------|----------|----------|--------|----------|----------|--------|----------|----------|
| QV     | 200.1394 | 228.1343 | QVW    | 386.2187 | 414.2136 | QVWP   | 483.2714 | 511.2663 |
| QVWPI  | 596.3555 | 624.3504 | VW     | 258.1601 | 286.1550 | VWP    | 355.2129 | 383.2078 |
| VWPI   | 468.2969 | 496.2918 | VWPIE  | 597.3395 | 625.3344 | VWPIEG | 654.3610 | 682.3559 |
| WP     | 256.1444 | 284.1394 | WPI    | 369.2285 | 397.2234 | WPIE   | 498.2711 | 526.2660 |
| WPIEG  | 555.2926 | 583.2875 | WPIEGI | 668.3766 | 696.3715 | PI     | 183.1492 | 211.1441 |
| PIE    | 312.1918 | 340.1867 | PIEG   | 369.2132 | 397.2082 | PIEGI  | 482.2973 | 510.2922 |
| PIEGIK | 610.3923 | 638.3872 | IE     | 215.1390 | 243.1339 | IEG    | 272.1605 | 300.1554 |
| IEGI   | 385.2445 | 413.2395 | IEGIK  | 513.3395 | 541.3344 | EG     | 159.0764 | 187.0713 |
| EGI    | 272.1605 | 300.1554 | EGIK   | 400.2554 | 428.2504 | GI     | 143.1179 | 171.1128 |
| GIK    | 271.2129 | 299.2078 | IK     | 214.1914 | 242.1863 |        |          |          |



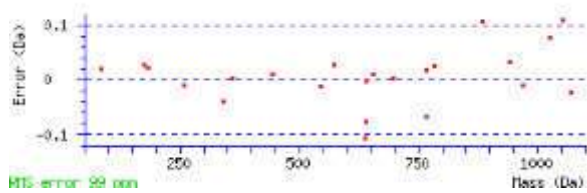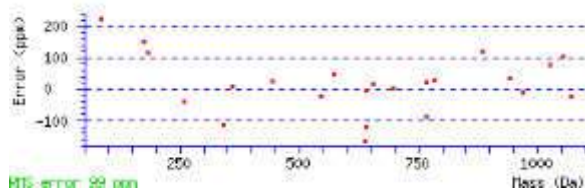

NCBI **BLAST** search of [MOVWPIEGIKK](#)

(Parameters: blastp, nr protein database, expect=20000, no filter, PAM30)

Other BLAST [web gateways](#)

**All matches to this query**

| Score | Mr(calc)  | Delta  | Sequence                      |
|-------|-----------|--------|-------------------------------|
| 27.4  | 1327.7322 | 0.1158 | <a href="#">MOVWPIEGIKK</a>   |
| 27.4  | 1327.7322 | 0.1158 | <a href="#">MOVWPIEGIKK</a>   |
| 26.9  | 1327.7459 | 0.1021 | <a href="#">EKTVPLOS AIR</a>  |
| 21.6  | 1327.7646 | 0.0835 | <a href="#">NCLTIALLALAR</a>  |
| 20.2  | 1327.7646 | 0.0835 | <a href="#">ADMKVGALLAALR</a> |
| 19.5  | 1327.7646 | 0.0835 | <a href="#">OKMGLLLIGAER</a>  |
| 18.4  | 1327.8340 | 0.0141 | <a href="#">VAVKFKPSLAIR</a>  |
| 18.1  | 1327.7459 | 0.1021 | <a href="#">LTSENKAHSR</a>    |
| 17.9  | 1327.7572 | 0.0909 | <a href="#">IGISSIAGERGR</a>  |
| 17.9  | 1327.7572 | 0.0908 | <a href="#">RSDGILGTGLAR</a>  |

Mascot: <http://www.matrixscience.com/>


**Mascot Search Results**
**Peptide View Spot no 8**
MS/MS Fragmentation of **SKWVPCLEFSK**Found in **gi56966763** in **NCBI**nr, Chain S, Crystal Structure Of Activated Rice Rubisco Complexed With 2- Carboxyarabinitol-1,5-Bisphosphate

Match to Query 183: 1379.818024 from(1380.825300,1+) intensity(0.0000) index(22)

Title: Label: N9, Spot\_Id: 219815, Peak\_List\_Id: 227096, MSMS Job\_Run\_Id: 21951, Comment:

Data file C:\Documents and Settings\Administrator\Desktop\Farah-Garima 11May 2013\ppw\_N9\_136868212700.txt

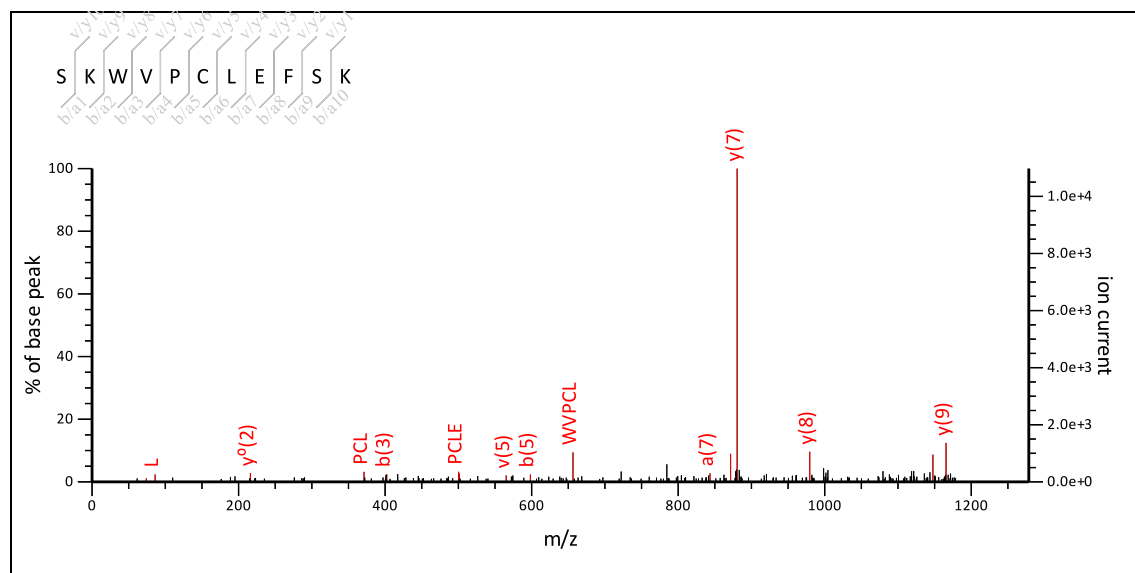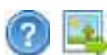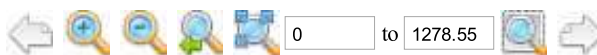Label all possible matches  Label matches used for scoring 

Monoisotopic mass of neutral peptide Mr(calc): 1379.6907

Fixed modifications: Carbamidomethyl (C) (apply to specified residues or termini only)

Ions Score: 24 Expect: 77

Matches : 18/176 fragment ions using 36 most intense peaks ([help](#))

| #  | Immon.         | a               | a*        | a <sup>0</sup> | b                | b*        | b <sup>0</sup> | d         | Seq. | v               | w         | y                | y*        | y <sup>0</sup>   | #  |
|----|----------------|-----------------|-----------|----------------|------------------|-----------|----------------|-----------|------|-----------------|-----------|------------------|-----------|------------------|----|
| 1  | 60.0444        | 60.0444         |           | 42.0338        | 88.0393          |           | 70.0287        | 44.0495   | S    |                 |           |                  |           |                  | 11 |
| 2  | 101.1073       | 188.1394        | 171.1128  | 170.1288       | <b>216.1343</b>  | 199.1077  | 198.1237       | 131.0815  | K    | 1220.5769       | 1219.5816 | 1293.6660        | 1276.6395 | 1275.6554        | 10 |
| 3  | 159.0917       | 374.2187        | 357.1921  | 356.2081       | <b>402.2136</b>  | 385.1870  | 384.2030       |           | W    | 1034.4975       |           | <b>1165.5710</b> | 1148.5445 | <b>1147.5605</b> | 9  |
| 4  | 72.0808        | 473.2871        | 456.2605  | 455.2765       | <b>501.2820</b>  | 484.2554  | 483.2714       | 459.2714  | V    | 935.4291        | 948.4495  | <b>979.4917</b>  | 962.4652  | 961.4812         | 8  |
| 5  | 70.0651        | 570.3398        | 553.3133  | 552.3293       | <b>598.3348</b>  | 581.3082  | 580.3242       | 544.3242  | P    | 838.3764        | 837.3811  | <b>880.4233</b>  | 863.3968  | 862.4128         | 7  |
| 6  | 133.0430       | 730.3705        | 713.3439  | 712.3599       | 758.3654         | 741.3389  | 740.3548       | 641.3770  | C    | 678.3457        | 677.3505  | 783.3706         | 766.3440  | 765.3600         | 6  |
| 7  | <b>86.0964</b> | <b>843.4546</b> | 826.4280  | 825.4440       | <b>871.4495</b>  | 854.4229  | 853.4389       | 801.4076  | L    | <b>565.2617</b> | 564.2664  | 623.3399         | 606.3134  | 605.3293         | 5  |
| 8  | 102.0550       | 972.4971        | 955.4706  | 954.4866       | 1000.4921        | 983.4655  | 982.4815       | 914.4917  | E    | 436.2191        | 435.2238  | 510.2558         | 493.2293  | 492.2453         | 4  |
| 9  | 120.0808       | 1119.5656       | 1102.5390 | 1101.5550      | <b>1147.5605</b> | 1130.5339 | 1129.5499      |           | F    | 289.1506        |           | 381.2132         | 364.1867  | 363.2027         | 3  |
| 10 | 60.0444        | 1206.5976       | 1189.5710 | 1188.5870      | 1234.5925        | 1217.5660 | 1216.5819      | 1190.6027 | S    | 202.1186        | 201.1234  | 234.1448         | 217.1183  | <b>216.1343</b>  | 2  |
| 11 | 101.1073       |                 |           |                |                  |           |                |           | K    | <b>74.0237</b>  | 73.0284   | 147.1128         | 130.0863  |                  | 1  |

| Seq   | ya       | yb       | Seq  | ya       | yb              | Seq   | ya       | yb              |
|-------|----------|----------|------|----------|-----------------|-------|----------|-----------------|
| KW    | 287.1866 | 315.1816 | KWV  | 386.2551 | 414.2500        | KWVP  | 483.3078 | 511.3027        |
| KWVPC | 643.3385 | 671.3334 | WV   | 258.1601 | 286.1550        | WVP   | 355.2129 | 383.2078        |
| WVPC  | 515.2435 | 543.2384 | WVPC | 628.3276 | <b>656.3225</b> | VP    | 169.1335 | 197.1285        |
| VPC   | 329.1642 | 357.1591 | VPCL | 442.2483 | 470.2432        | VPCLE | 571.2908 | 599.2858        |
| PC    | 230.0958 | 258.0907 | PCL  | 343.1798 | <b>371.1748</b> | PCLE  | 472.2224 | <b>500.2173</b> |
| PCLEF | 619.2908 | 647.2858 | CL   | 246.1271 | 274.1220        | CLE   | 375.1697 | 403.1646        |

|                      |          |          |                       |          |          |                    |          |          |
|----------------------|----------|----------|-----------------------|----------|----------|--------------------|----------|----------|
| <a href="#">CLEF</a> | 522.2381 | 550.2330 | <a href="#">CLEFS</a> | 609.2701 | 637.2650 | <a href="#">LE</a> | 215.1390 | 243.1339 |
| <a href="#">LEF</a>  | 362.2074 | 390.2023 | <a href="#">LEFS</a>  | 449.2395 | 477.2344 | <a href="#">EF</a> | 249.1234 | 277.1183 |
| <a href="#">EFS</a>  | 336.1554 | 364.1503 | <a href="#">FS</a>    | 207.1128 | 235.1077 |                    |          |          |

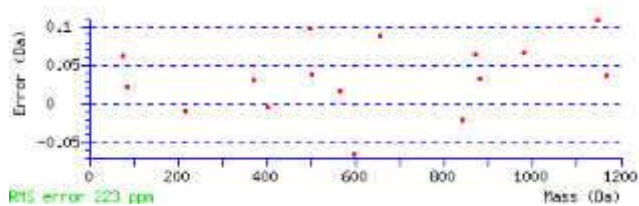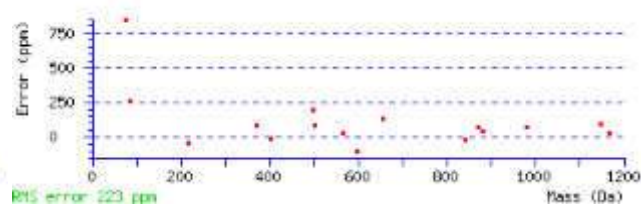

NCBI BLAST search of [SKWVPCLEFSK](#)

(Parameters: blastp, nr protein database, expect=20000, no filter, PAM30)

Other BLAST [web gateways](#)

#### All matches to this query

| Score | Mr(calc)  | Delta   | Sequence                      |
|-------|-----------|---------|-------------------------------|
| 24.4  | 1379.6907 | 0.1273  | <a href="#">SKWVPCLEFSK</a>   |
| 20.9  | 1379.6867 | 0.1313  | <a href="#">IREEHMIPDPK</a>   |
| 20.4  | 1379.7231 | 0.0949  | <a href="#">LMGFLDGTGAVRK</a> |
| 20.3  | 1379.7885 | 0.0295  | <a href="#">LTPSERPVVLNR</a>  |
| 18.7  | 1379.6867 | 0.1313  | <a href="#">LREYCDVQVK</a>    |
| 18.7  | 1379.7343 | 0.0837  | <a href="#">LGIDMOPHVARK</a>  |
| 18.6  | 1379.8249 | -0.0068 | <a href="#">IVSSLRQIHISK</a>  |
| 18.4  | 1379.7521 | 0.0659  | <a href="#">ADVIERQLAHTK</a>  |
| 16.5  | 1379.8249 | -0.0068 | <a href="#">AGSVLLRISHK</a>   |
| 16.4  | 1379.7674 | 0.0507  | <a href="#">VWIATHSVAQR</a>   |

Mascot: <http://www.matrixscience.com/>

**MATRIX SCIENCE Mascot Search Results**

**Peptide View Spot no 8**

MS/MS Fragmentation of **LPMFGCTDATQVLK**

Found in **gi56966763** in **NCBI nr**, Chain S, Crystal Structure Of Activated Rice Rubisco Complexed With 2- Carboxyarabinitol-1,5-Bisphosphate

Match to Query 205: 1579.924724 from(1580.932000,1+) intensity(0.0000) index(26)

Title: Label N9, Spot\_Id: 219815, Peak\_List\_Id: 227100, MSMS Job\_Run\_Id: 21951, Comment:

Data file C:\Documents and Settings\Administrator\Desktop\Farah-Garima 11May 2013\ppw\_N9\_136868212700.txt

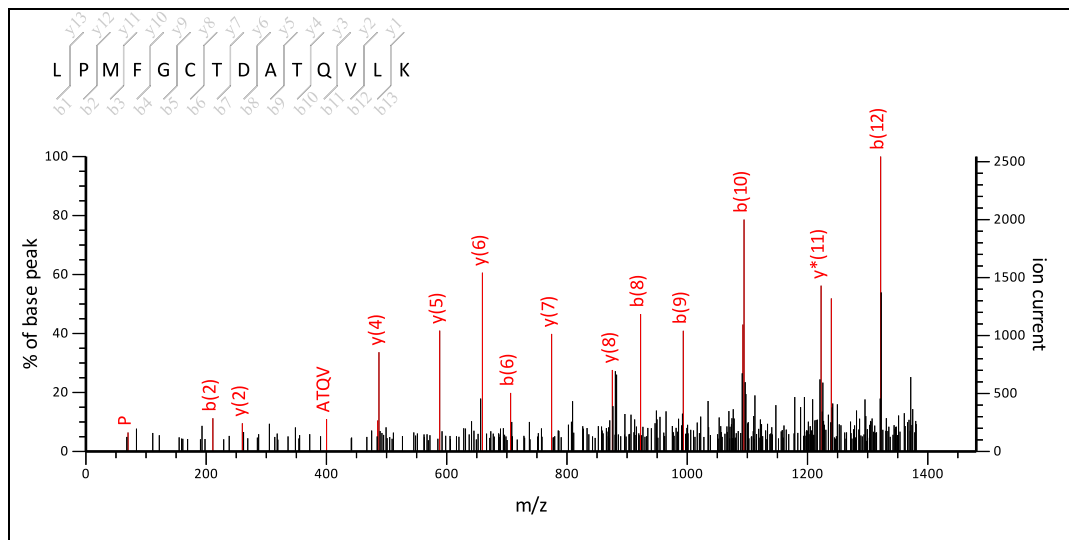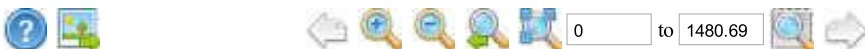

Label all possible matches  Label matches used for scoring

Monoisotopic mass of neutral peptide Mr(calc): 1579.7738

Fixed modifications: Carbamidomethyl (C) (apply to specified residues or termini only)

Ions Score: 60 Expect: 0.019

Matches : 24/220 fragment ions using 28 most intense peaks [\(help\)](#)

| #  | Immon.   | a         | a*        | a <sup>0</sup> | b         | b*        | b <sup>0</sup> | d         | d'        | Seq. | v         | w         | w'       | y         | y*        |
|----|----------|-----------|-----------|----------------|-----------|-----------|----------------|-----------|-----------|------|-----------|-----------|----------|-----------|-----------|
| 1  | 86.0964  | 86.0964   |           |                | 114.0913  |           |                | 44.0495   |           | L    |           |           |          |           |           |
| 2  | 70.0651  | 183.1492  |           |                | 211.1441  |           |                | 157.1335  |           | P    | 1425.6501 | 1424.6549 |          | 1467.6971 | 1450.6705 |
| 3  | 104.0528 | 314.1897  |           |                | 342.1846  |           |                | 254.1863  |           | M    | 1294.6096 | 1293.6144 |          | 1370.6443 | 1353.6177 |
| 4  | 120.0808 | 461.2581  |           |                | 489.2530  |           |                |           |           | F    | 1147.5412 |           |          | 1239.6038 | 1222.5773 |
| 5  | 30.0338  | 518.2796  |           |                | 546.2745  |           |                |           |           | G    |           |           |          | 1092.5354 | 1075.5088 |
| 6  | 133.0430 | 678.3102  |           |                | 706.3051  |           |                | 589.3167  |           | C    | 930.4891  | 929.4938  |          | 1035.5139 | 1018.4874 |
| 7  | 74.0600  | 779.3579  |           | 761.3473       | 807.3528  |           | 789.3422       | 763.3630  | 765.3422  | T    | 829.4414  | 842.4618  | 844.4411 | 875.4833  | 858.4567  |
| 8  | 88.0393  | 894.3848  |           | 876.3743       | 922.3797  |           | 904.3692       | 850.3950  |           | D    | 714.4145  | 713.4192  |          | 774.4356  | 757.4090  |
| 9  | 44.0495  | 965.4219  |           | 947.4114       | 993.4169  |           | 975.4063       |           |           | A    | 643.3774  |           |          | 659.4087  | 642.3821  |
| 10 | 74.0600  | 1066.4696 |           | 1048.4591      | 1094.4645 |           | 1076.4540      | 1050.4747 | 1052.4540 | T    | 542.3297  | 555.3501  | 557.3293 | 588.3715  | 571.3450  |
| 11 | 101.0709 | 1194.5282 | 1177.5016 | 1176.5176      | 1222.5231 | 1205.4966 | 1204.5125      | 1137.5067 |           | Q    | 414.2711  | 413.2758  |          | 487.3239  | 470.2973  |
| 12 | 72.0808  | 1293.5966 | 1276.5701 | 1275.5860      | 1321.5915 | 1304.5650 | 1303.5810      | 1279.5810 |           | V    | 315.2027  | 328.2231  |          | 359.2653  | 342.2387  |
| 13 | 86.0964  | 1406.6807 | 1389.6541 | 1388.6701      | 1434.6756 | 1417.6490 | 1416.6650      | 1364.6337 |           | L    | 202.1186  | 201.1234  |          | 260.1969  | 243.1703  |
| 14 | 101.1073 |           |           |                |           |           |                |           |           | K    | 74.0237   | 73.0284   |          | 147.1128  | 130.0863  |

| Seq    | ya       | yb       | Seq    | ya       | yb       | Seq    | ya       | yb       |
|--------|----------|----------|--------|----------|----------|--------|----------|----------|
| PM     | 201.1056 | 229.1005 | PMF    | 348.1740 | 376.1689 | PMFG   | 405.1955 | 433.1904 |
| PMFGC  | 565.2261 | 593.2211 | PMFGCT | 666.2738 | 694.2687 | MF     | 251.1213 | 279.1162 |
| MFG    | 308.1427 | 336.1376 | MFGC   | 468.1734 | 496.1683 | MFGCT  | 569.2211 | 597.2160 |
| MFGCTD | 684.2480 | 712.2429 | FG     | 177.1022 | 205.0972 | FGC    | 337.1329 | 365.1278 |
| FGCT   | 438.1806 | 466.1755 | FGCTD  | 553.2075 | 581.2024 | FGCTDA | 624.2446 | 652.2395 |
| GC     | 190.0645 | 218.0594 | GCT    | 291.1122 | 319.1071 | GCTD   | 406.1391 | 434.1340 |
| GCTDA  | 477.1762 | 505.1711 | GCTDAT | 578.2239 | 606.2188 | CT     | 234.0907 | 262.0856 |

|               |                 |          |               |                 |                 |               |                 |          |
|---------------|-----------------|----------|---------------|-----------------|-----------------|---------------|-----------------|----------|
| <b>CTD</b>    | 349.1176        | 377.1125 | <b>CTDA</b>   | 420.1547        | 448.1497        | <b>CTDAT</b>  | 521.2024        | 549.1973 |
| <b>CTDATQ</b> | 649.2610        | 677.2559 | <b>TD</b>     | 189.0870        | 217.0819        | <b>TDA</b>    | <b>260.1241</b> | 288.1190 |
| <b>TDAT</b>   | 361.1718        | 389.1667 | <b>TDATQ</b>  | 489.2304        | 517.2253        | <b>TDATQV</b> | <b>588.2988</b> | 616.2937 |
| <b>DA</b>     | 159.0764        | 187.0713 | <b>DAT</b>    | <b>260.1241</b> | 288.1190        | <b>DATQ</b>   | 388.1827        | 416.1776 |
| <b>DATQV</b>  | <b>487.2511</b> | 515.2460 | <b>DATQVL</b> | 600.3352        | 628.3301        | <b>AT</b>     | 145.0972        | 173.0921 |
| <b>ATQ</b>    | 273.1557        | 301.1506 | <b>ATQV</b>   | <b>372.2241</b> | <b>400.2191</b> | <b>ATQVL</b>  | <b>485.3082</b> | 513.3031 |
| <b>TQ</b>     | 202.1186        | 230.1135 | <b>TQV</b>    | 301.1870        | 329.1819        | <b>TQVL</b>   | 414.2711        | 442.2660 |
| <b>QV</b>     | 200.1394        | 228.1343 | <b>QVL</b>    | 313.2234        | 341.2183        | <b>VL</b>     | 185.1648        | 213.1598 |

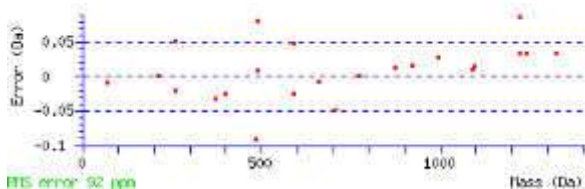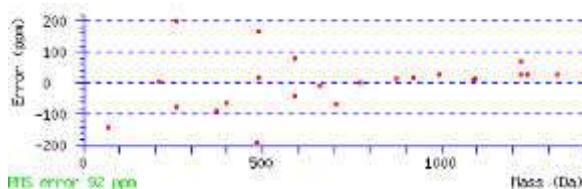

NCBI BLAST search of [LPMFGCTDATOVLK](#)

(Parameters: blastp, nr protein database, expect=20000, no filter, PAM30)

Other BLAST [web gateways](#)

#### All matches to this query

| Score | Mr(calc)  | Delta  | Sequence                         |
|-------|-----------|--------|----------------------------------|
| 60.5  | 1579.7738 | 0.1509 | <a href="#">LPMFGCTDATOVLK</a>   |
| 24.4  | 1579.8756 | 0.0491 | <a href="#">FLLSRMSSATOVLK</a>   |
| 23.0  | 1579.8570 | 0.0678 | <a href="#">LPLPGDLTDAQTALR</a>  |
| 21.0  | 1579.7916 | 0.1331 | <a href="#">QMGFEESLATOLVK</a>   |
| 18.3  | 1579.8029 | 0.1219 | <a href="#">MFDTVAIVGATGAVGR</a> |
| 17.9  | 1579.8868 | 0.0379 | <a href="#">RMIAEHALATNLIK</a>   |
| 17.6  | 1579.8206 | 0.1042 | <a href="#">ENKLSSTSEILAR</a>    |
| 17.5  | 1579.7850 | 0.1397 | <a href="#">KONGMMLFATOSPK</a>   |
| 16.3  | 1579.8643 | 0.0604 | <a href="#">VYTLIMOGATLNLK</a>   |
| 16.2  | 1579.8933 | 0.0314 | <a href="#">ELVOELLPATGAIR</a>   |

Mascot: <http://www.matrixscience.com/>

**MATRIX SCIENCE Mascot Search Results**

**Peptide View Spot no 8**

MS/MS Fragmentation of **LPMFGCTDATQVLK**

Found in **gi56966763** in **NCBI**nr, Chain S, Crystal Structure Of Activated Rice Rubisco Complexed With 2- Carboxyarabinitol-1,5-Bisphosphate

Match to Query 207: 1595.917624 from(1596.924900,1+) intensity(0.0000) index(27)  
 Title: Label: N9, Spot\_Id: 219815, Peak\_List\_Id: 227095, MSMS Job\_Run\_Id: 21951, Comment:  
 Data file C:\Documents and Settings\Administrator\Desktop\Farah-Garima 11May 2013\ppw\_N9\_136868212700.txt

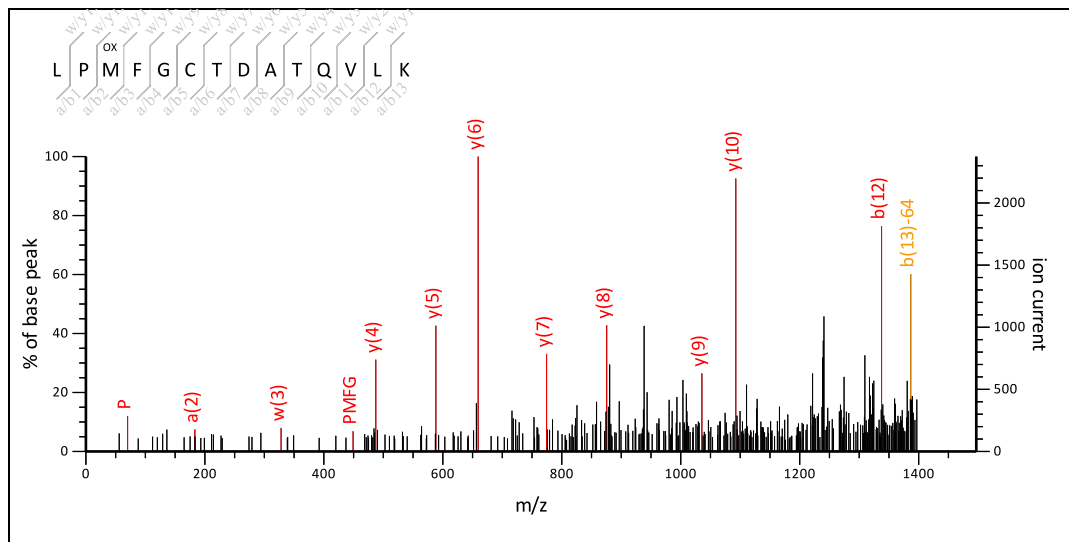

Navigation icons: Home, Back, Forward, Search, and a range input field from 0 to 1496.86.

Label all possible matches  Label matches used for scoring

Monoisotopic mass of neutral peptide Mr(calc): 1595.7688  
 Fixed modifications: Carbamidomethyl (C) (apply to specified residues or termini only)  
 Variable modifications:  
 M3 : Oxidation (M), with neutral losses 0.0000 (shown in table), 63.9983  
 Ions Score: 74 Expect: 0.00091  
 Matches : 18/295 fragment ions using 14 most intense peaks ([help](#))

| #  | Immon.   | a         | a*        | a <sup>0</sup> | b         | b*        | b <sup>0</sup> | d         | d'        | Seq. | v         | w         | w'       | y         | y*        |
|----|----------|-----------|-----------|----------------|-----------|-----------|----------------|-----------|-----------|------|-----------|-----------|----------|-----------|-----------|
| 1  | 86.0964  | 86.0964   |           |                | 114.0913  |           |                | 44.0495   |           | L    |           |           |          |           |           |
| 2  | 70.0651  | 183.1492  |           |                | 211.1441  |           |                | 157.1335  |           | P    | 1441.6450 | 1440.6498 |          | 1483.6920 | 1466.6654 |
| 3  | 120.0478 | 330.1846  |           |                | 358.1795  |           |                | 254.1863  |           | M    | 1294.6096 | 1293.6144 |          | 1386.6392 | 1369.6127 |
| 4  | 120.0808 | 477.2530  |           |                | 505.2479  |           |                |           |           | F    | 1147.5412 |           |          | 1239.6038 | 1222.5773 |
| 5  | 30.0338  | 534.2745  |           |                | 562.2694  |           |                |           |           | G    |           |           |          | 1092.5354 | 1075.5088 |
| 6  | 133.0430 | 694.3051  |           |                | 722.3000  |           |                | 605.3116  |           | C    | 930.4891  | 929.4938  |          | 1035.5139 | 1018.4874 |
| 7  | 74.0600  | 795.3528  |           | 777.3422       | 823.3477  |           | 805.3371       | 779.3579  | 781.3371  | T    | 829.4414  | 842.4618  | 844.4411 | 875.4833  | 858.4567  |
| 8  | 88.0393  | 910.3797  |           | 892.3692       | 938.3747  |           | 920.3641       | 866.3899  |           | D    | 714.4145  | 713.4192  |          | 774.4356  | 757.4090  |
| 9  | 44.0495  | 981.4169  |           | 963.4063       | 1009.4118 |           | 991.4012       |           |           | A    | 643.3774  |           |          | 659.4087  | 642.3821  |
| 10 | 74.0600  | 1082.4645 |           | 1064.4540      | 1110.4594 |           | 1092.4489      | 1066.4696 | 1068.4489 | T    | 542.3297  | 555.3501  | 557.3293 | 588.3715  | 571.3450  |
| 11 | 101.0709 | 1210.5231 | 1193.4966 | 1192.5125      | 1238.5180 | 1221.4915 | 1220.5075      | 1153.5016 |           | Q    | 414.2711  | 413.2758  |          | 487.3239  | 470.2973  |
| 12 | 72.0808  | 1309.5915 | 1292.5650 | 1291.5810      | 1337.5864 | 1320.5599 | 1319.5759      | 1295.5759 |           | V    | 315.2027  | 328.2231  |          | 359.2653  | 342.2387  |
| 13 | 86.0964  | 1422.6756 | 1405.6490 | 1404.6650      | 1450.6705 | 1433.6440 | 1432.6599      | 1380.6286 |           | L    | 202.1186  | 201.1234  |          | 260.1969  | 243.1703  |
| 14 | 101.1073 |           |           |                |           |           |                |           |           | K    | 74.0237   | 73.0284   |          | 147.1128  | 130.0863  |

| Seq   | ya       | yb       | Seq    | ya       | yb       | Seq   | ya       | yb       |
|-------|----------|----------|--------|----------|----------|-------|----------|----------|
| PM    | 217.1005 | 245.0954 | PMF    | 364.1689 | 392.1639 | PMFG  | 421.1904 | 449.1853 |
| PMFGC | 581.2211 | 609.2160 | PMFGCT | 682.2687 | 710.2636 | MF    | 267.1162 | 295.1111 |
| MFG   | 324.1376 | 352.1326 | MFGC   | 484.1683 | 512.1632 | MFGCT | 585.2160 | 613.2109 |
| FG    | 177.1022 | 205.0972 | FGC    | 337.1329 | 365.1278 | FGCT  | 438.1806 | 466.1755 |
| FGCTD | 553.2075 | 581.2024 | FGCTDA | 624.2446 | 652.2395 | GC    | 190.0645 | 218.0594 |
| GCT   | 291.1122 | 319.1071 | GCTD   | 406.1391 | 434.1340 | GCTDA | 477.1762 | 505.1711 |

|                        |          |          |                        |          |          |                        |          |          |
|------------------------|----------|----------|------------------------|----------|----------|------------------------|----------|----------|
| <a href="#">GCTDAT</a> | 578.2239 | 606.2188 | <a href="#">CT</a>     | 234.0907 | 262.0856 | <a href="#">CTD</a>    | 349.1176 | 377.1125 |
| <a href="#">CTDA</a>   | 420.1547 | 448.1497 | <a href="#">CTDAT</a>  | 521.2024 | 549.1973 | <a href="#">CTDATQ</a> | 649.2610 | 677.2559 |
| <a href="#">TD</a>     | 189.0870 | 217.0819 | <a href="#">TDA</a>    | 260.1241 | 288.1190 | <a href="#">TDAT</a>   | 361.1718 | 389.1667 |
| <a href="#">TDATQ</a>  | 489.2304 | 517.2253 | <a href="#">TDATQV</a> | 588.2988 | 616.2937 | <a href="#">DA</a>     | 159.0764 | 187.0713 |
| <a href="#">DAT</a>    | 260.1241 | 288.1190 | <a href="#">DATQ</a>   | 388.1827 | 416.1776 | <a href="#">DATQV</a>  | 487.2511 | 515.2460 |
| <a href="#">DATQVL</a> | 600.3352 | 628.3301 | <a href="#">AT</a>     | 145.0972 | 173.0921 | <a href="#">ATQ</a>    | 273.1557 | 301.1506 |
| <a href="#">ATQV</a>   | 372.2241 | 400.2191 | <a href="#">ATQVL</a>  | 485.3082 | 513.3031 | <a href="#">TQ</a>     | 202.1186 | 230.1135 |
| <a href="#">TQV</a>    | 301.1870 | 329.1819 | <a href="#">TQVL</a>   | 414.2711 | 442.2660 | <a href="#">QV</a>     | 200.1394 | 228.1343 |
| <a href="#">QVL</a>    | 313.2234 | 341.2183 | <a href="#">VL</a>     | 185.1648 | 213.1598 |                        |          |          |

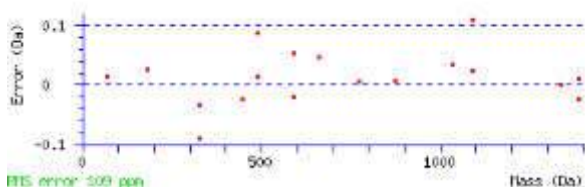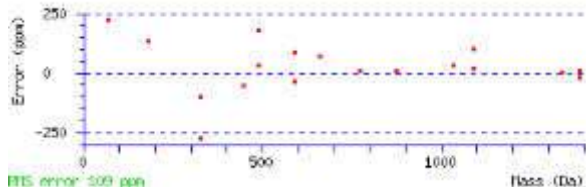

NCBI BLAST search of [LPMFGCTDATOVLK](#)

(Parameters: blastp, nr protein database, expect=20000, no filter, PAM30)

Other BLAST [web gateways](#)

#### All matches to this query

| Score | Mr(calc)  | Delta  | Sequence                        |
|-------|-----------|--------|---------------------------------|
| 74.2  | 1595.7688 | 0.1489 | <a href="#">LPMFGCTDATOVLK</a>  |
| 74.2  | 1595.7688 | 0.1489 | <a href="#">LPMYGCTDATOVLK</a>  |
| 26.0  | 1595.8276 | 0.0900 | <a href="#">TLLLMVSTCLHHR</a>   |
| 24.1  | 1595.8882 | 0.0294 | <a href="#">VGSSRTAEEPILPK</a>  |
| 16.1  | 1595.7692 | 0.1484 | <a href="#">HDHPTADALYTSIR</a>  |
| 15.8  | 1595.8379 | 0.0797 | <a href="#">EQRAQLPDATIAQR</a>  |
| 15.1  | 1595.8269 | 0.0907 | <a href="#">VFLDALDVMGYPIK</a>  |
| 14.7  | 1595.7614 | 0.1562 | <a href="#">VCVAGGDVVSSEYVR</a> |
| 14.1  | 1595.7687 | 0.1489 | <a href="#">EHLMFDMDKPGR</a>    |
| 13.9  | 1595.8415 | 0.0761 | <a href="#">LMMLEGEKSGLNLIK</a> |

Mascot: <http://www.matrixscience.com/>





# Mascot Search Results

## Peptide View **Spot no 10**

MS/MS Fragmentation of **SGGGGGGGYGQR**

Found in **gi|18103931** in **NCBIInr**, glycine rich RNA binding protein [Oryza sativa Indica Group]

Match to Query 12: 1008.498624 from(1009.505900,1+) intensity(0.0000) index(5)

Title: Label: E6, Spot\_Id: 228926, Peak\_List\_Id: 257517, MSMS Job\_Run\_Id: 24923, Comment:

Data file ppw\_E6\_138985130300.txt

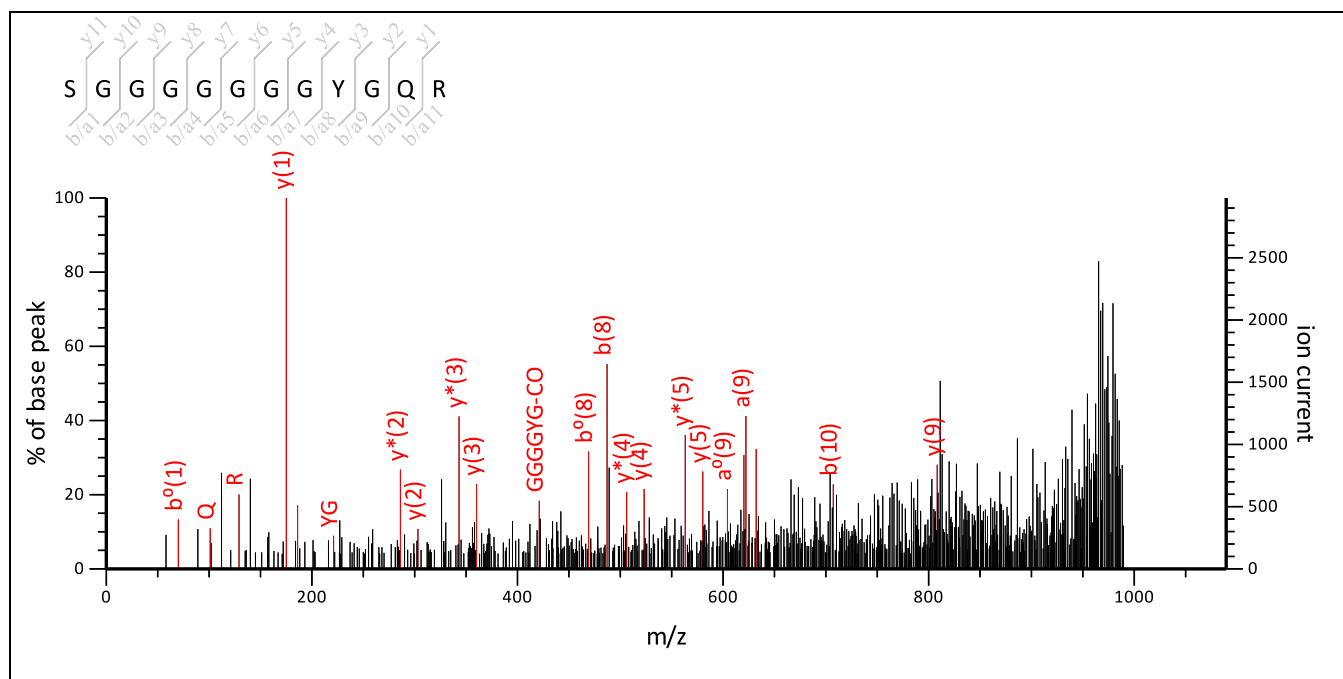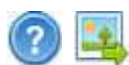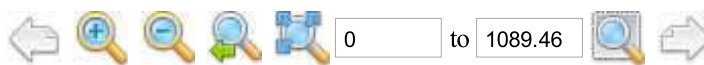

Label all possible matches  Label matches used for scoring

**Monoisotopic mass of neutral peptide Mr(calc):** 1008.4373

**Fixed modifications:** Carbamidomethyl (C) (apply to specified residues or termini only)

**Ions Score:** 17 **Expect:** 50

**Matches:** 37/175 fragment ions using 60 most intense peaks ([help](#))

| #  | Immon.   | a        | a* | a <sup>0</sup> | b        | b* | b <sup>0</sup> | d       | Seq. | v        | w | y        | y*       | #  |
|----|----------|----------|----|----------------|----------|----|----------------|---------|------|----------|---|----------|----------|----|
| 1  | 60.0444  | 60.0444  |    | 42.0338        | 88.0393  |    | 70.0287        | 44.0495 | S    |          |   |          |          | 12 |
| 2  | 30.0338  | 117.0659 |    | 99.0553        | 145.0608 |    | 127.0502       |         | G    |          |   | 922.4126 | 905.3860 | 11 |
| 3  | 30.0338  | 174.0873 |    | 156.0768       | 202.0822 |    | 184.0717       |         | G    |          |   | 865.3911 | 848.3646 | 10 |
| 4  | 30.0338  | 231.1088 |    | 213.0982       | 259.1037 |    | 241.0931       |         | G    |          |   | 808.3696 | 791.3431 | 9  |
| 5  | 30.0338  | 288.1302 |    | 270.1197       | 316.1252 |    | 298.1146       |         | G    |          |   | 751.3482 | 734.3216 | 8  |
| 6  | 30.0338  | 345.1517 |    | 327.1411       | 373.1466 |    | 355.1361       |         | G    |          |   | 694.3267 | 677.3002 | 7  |
| 7  | 30.0338  | 402.1732 |    | 384.1626       | 430.1681 |    | 412.1575       |         | G    |          |   | 637.3053 | 620.2787 | 6  |
| 8  | 30.0338  | 459.1946 |    | 441.1841       | 487.1896 |    | 469.1790       |         | G    |          |   | 580.2838 | 563.2572 | 5  |
| 9  | 136.0757 | 622.2580 |    | 604.2474       | 650.2529 |    | 632.2423       |         | Y    | 415.2048 |   | 523.2623 | 506.2358 | 4  |
| 10 | 30.0338  | 679.2794 |    | 661.2689       | 707.2743 |    | 689.2638       |         | G    |          |   | 360.1990 | 343.1724 | 3  |

|    |          |          |          |          |          |          |          |          |   |          |          |          |          |   |
|----|----------|----------|----------|----------|----------|----------|----------|----------|---|----------|----------|----------|----------|---|
| 11 | 101.0709 | 807.3380 | 790.3115 | 789.3274 | 835.3329 | 818.3064 | 817.3224 | 750.3165 | Q | 230.1248 | 229.1295 | 303.1775 | 286.1510 | 2 |
| 12 | 129.1135 |          |          |          |          |          |          |          | R | 74.0237  | 73.0284  | 175.1190 | 158.0924 | 1 |

| Seq       | ya       | yb       | Seq       | ya       | yb       | Seq      | ya       | yb       |
|-----------|----------|----------|-----------|----------|----------|----------|----------|----------|
| GG        | 87.0553  | 115.0502 | GGG       | 144.0768 | 172.0717 | GGGG     | 201.0982 | 229.0931 |
| GGGG      | 258.1197 | 286.1146 | GGGGGG    | 315.1411 | 343.1361 | GGGGGGG  | 372.1626 | 400.1575 |
| GGGGGGGY  | 535.2259 | 563.2209 | GGGGGGGYG | 592.2474 | 620.2423 | GG       | 87.0553  | 115.0502 |
| GGG       | 144.0768 | 172.0717 | GGGG      | 201.0982 | 229.0931 | GGGGG    | 258.1197 | 286.1146 |
| GGGGGG    | 315.1411 | 343.1361 | GGGGGGY   | 478.2045 | 506.1994 | GGGGGGYG | 535.2259 | 563.2209 |
| GGGGGGYGQ | 663.2845 | 691.2794 | GG        | 87.0553  | 115.0502 | GGG      | 144.0768 | 172.0717 |
| GGGG      | 201.0982 | 229.0931 | GGGGG     | 258.1197 | 286.1146 | GGGGGY   | 421.1830 | 449.1779 |
| GGGGGYG   | 478.2045 | 506.1994 | GGGGGYGQ  | 606.2631 | 634.2580 | GG       | 87.0553  | 115.0502 |
| GGG       | 144.0768 | 172.0717 | GGGG      | 201.0982 | 229.0931 | GGGGY    | 364.1615 | 392.1565 |
| GGGGY     | 421.1830 | 449.1779 | GGGGYGQ   | 549.2416 | 577.2365 | GG       | 87.0553  | 115.0502 |
| GGG       | 144.0768 | 172.0717 | GGGY      | 307.1401 | 335.1350 | GGGYG    | 364.1615 | 392.1565 |
| GGGYGQ    | 492.2201 | 520.2150 | GG        | 87.0553  | 115.0502 | GGY      | 250.1186 | 278.1135 |
| GGY       | 307.1401 | 335.1350 | GGYGQ     | 435.1987 | 463.1936 | GY       | 193.0972 | 221.0921 |
| GY        | 250.1186 | 278.1135 | GYGQ      | 378.1772 | 406.1721 | YG       | 193.0972 | 221.0921 |
| YGQ       | 321.1557 | 349.1506 | GQ        | 158.0924 | 186.0873 |          |          |          |

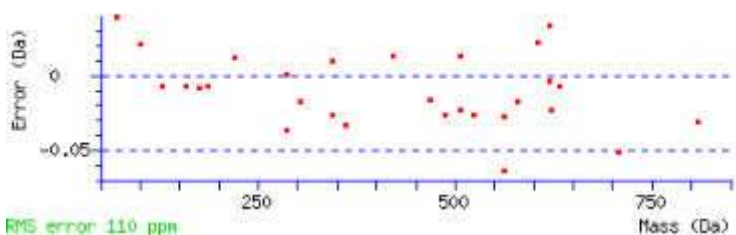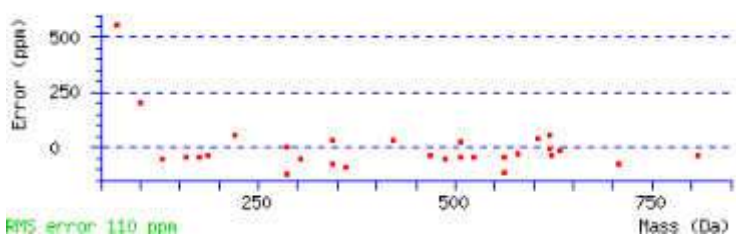

NCBI BLAST search of [SGGGGGGGYGQR](#)

(Parameters: blastp, nr protein database, expect=20000, no filter, PAM30)

Other BLAST [web gateways](#)

#### All matches to this query

| Score | Mr(calc)  | Delta   | Sequence                      |
|-------|-----------|---------|-------------------------------|
| 17.2  | 1008.4373 | 0.0613  | <a href="#">SGGGGGGGYGQR</a>  |
| 9.2   | 1008.5352 | -0.0366 | <a href="#">YGVVSGGSKR</a>    |
| 8.6   | 1008.4413 | 0.0573  | <a href="#">QDWGYANR</a>      |
| 8.1   | 1008.5101 | -0.0115 | <a href="#">RVGSSYGQR</a>     |
| 8.0   | 1008.4373 | 0.0613  | <a href="#">SGGGGGGGAGYGR</a> |
| 7.4   | 1008.5716 | -0.0730 | <a href="#">VVSANPVPAR</a>    |
| 7.2   | 1008.5287 | -0.0301 | <a href="#">QGAMPPRPR</a>     |

|     |           |         |                             |
|-----|-----------|---------|-----------------------------|
| 7.1 | 1008.4295 | 0.0692  | <a href="#">MASDGDGKGR</a>  |
| 6.6 | 1008.4889 | 0.0097  | <a href="#">RWYNSQR</a>     |
| 6.3 | 1008.5604 | -0.0618 | <a href="#">KSSLFEGGVSK</a> |

**Mascot:** <http://www.matrixscience.com/>

**MATRIX SCIENCE Mascot Search Results**

**Peptide View Spot no 10**

MS/MS Fragmentation of **RSGGGGGGGYGQR**

Found in **gi|18103931** in **NCBI nr**, glycine rich RNA binding protein [Oryza sativa Indica Group]

Match to Query 22: 1164.605024 from(1165.612300,1+) intensity(0.0000) index(9)

Title: Label: E6, Spot\_Id: 228926, Peak\_List\_Id: 257520, MSMS Job\_Run\_Id: 24923, Comment:

Data file ppw\_E6\_138985130300.txt

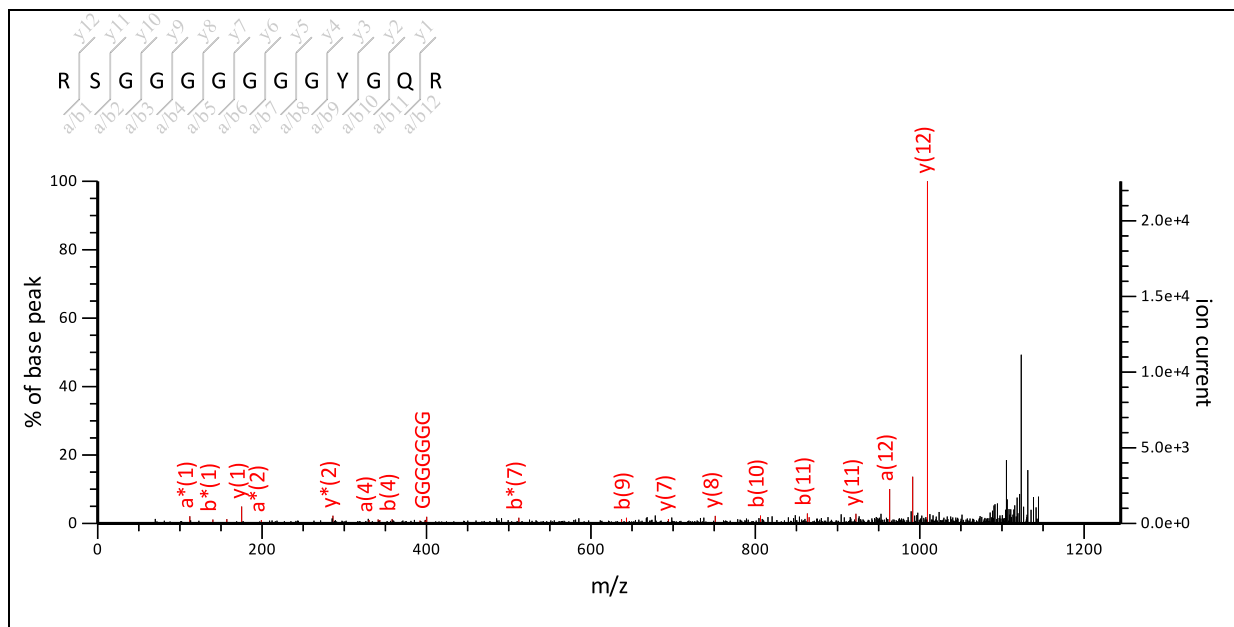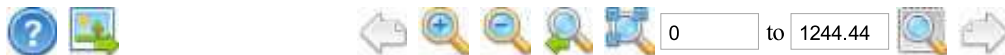

Label all possible matches  Label matches used for scoring

**Monoisotopic mass of neutral peptide Mr(calc):** 1164.5385

**Fixed modifications:** Carbamidomethyl (C) (apply to specified residues or termini only)

**Ions Score:** 30 **Expect:** 2.6

**Matches :** 32/223 fragment ions using 77 most intense peaks [\(help\)](#)

| #  | Immon.   | a        | a*       | a <sup>0</sup> | b        | b*       | b <sup>0</sup> | d        | Seq. | v        | w        | y         | y*       | y <sup>0</sup> | #  |
|----|----------|----------|----------|----------------|----------|----------|----------------|----------|------|----------|----------|-----------|----------|----------------|----|
| 1  | 129.1135 | 129.1135 | 112.0869 |                | 157.1084 | 140.0818 |                | 44.0495  | R    |          |          |           |          |                | 13 |
| 2  | 60.0444  | 216.1455 | 199.1190 | 198.1349       | 244.1404 | 227.1139 | 226.1298       | 200.1506 | S    | 977.4184 | 976.4231 | 1009.4446 | 992.4181 | 991.4340       | 12 |
| 3  | 30.0338  | 273.1670 | 256.1404 | 255.1564       | 301.1619 | 284.1353 | 283.1513       |          | G    |          |          | 922.4126  | 905.3860 |                | 11 |
| 4  | 30.0338  | 330.1884 | 313.1619 | 312.1779       | 358.1833 | 341.1568 | 340.1728       |          | G    |          |          | 865.3911  | 848.3646 |                | 10 |
| 5  | 30.0338  | 387.2099 | 370.1833 | 369.1993       | 415.2048 | 398.1783 | 397.1942       |          | G    |          |          | 808.3696  | 791.3431 |                | 9  |
| 6  | 30.0338  | 444.2314 | 427.2048 | 426.2208       | 472.2263 | 455.1997 | 454.2157       |          | G    |          |          | 751.3482  | 734.3216 |                | 8  |
| 7  | 30.0338  | 501.2528 | 484.2263 | 483.2423       | 529.2477 | 512.2212 | 511.2372       |          | G    |          |          | 694.3267  | 677.3002 |                | 7  |
| 8  | 30.0338  | 558.2743 | 541.2477 | 540.2637       | 586.2692 | 569.2427 | 568.2586       |          | G    |          |          | 637.3053  | 620.2787 |                | 6  |
| 9  | 30.0338  | 615.2957 | 598.2692 | 597.2852       | 643.2907 | 626.2641 | 625.2801       |          | G    |          |          | 580.2838  | 563.2572 |                | 5  |
| 10 | 136.0757 | 778.3591 | 761.3325 | 760.3485       | 806.3540 | 789.3274 | 788.3434       |          | Y    | 415.2048 |          | 523.2623  | 506.2358 |                | 4  |
| 11 | 30.0338  | 835.3805 | 818.3540 | 817.3700       | 863.3755 | 846.3489 | 845.3649       |          | G    |          |          | 360.1990  | 343.1724 |                | 3  |
| 12 | 101.0709 | 963.4391 | 946.4126 | 945.4286       | 991.4340 | 974.4075 | 973.4235       | 906.4177 | Q    | 230.1248 | 229.1295 | 303.1775  | 286.1510 |                | 2  |
| 13 | 129.1135 |          |          |                |          |          |                |          | R    | 74.0237  | 73.0284  | 175.1190  | 158.0924 |                | 1  |

| Seq      | ya       | yb       | Seq       | ya       | yb       | Seq        | ya       | yb       |
|----------|----------|----------|-----------|----------|----------|------------|----------|----------|
| SG       | 117.0659 | 145.0608 | SGG       | 174.0873 | 202.0822 | SGGG       | 231.1088 | 259.1037 |
| SGGGG    | 288.1302 | 316.1252 | SGGGGG    | 345.1517 | 373.1466 | SGGGGGG    | 402.1732 | 430.1681 |
| SGGGGGGG | 459.1946 | 487.1896 | SGGGGGGGY | 622.2580 | 650.2529 | SGGGGGGGYG | 679.2794 | 707.2743 |
| GG       | 87.0553  | 115.0502 | GGG       | 144.0768 | 172.0717 | GGGG       | 201.0982 | 229.0931 |
| GGGG     | 258.1197 | 286.1146 | GGGGG     | 315.1411 | 343.1361 | GGGGGG     | 372.1626 | 400.1575 |
| GGGGGGY  | 535.2259 | 563.2209 | GGGGGGGY  | 592.2474 | 620.2423 | GG         | 87.0553  | 115.0502 |
| GGG      | 144.0768 | 172.0717 | GGGG      | 201.0982 | 229.0931 | GGGGG      | 258.1197 | 286.1146 |
| GGGGG    | 315.1411 | 343.1361 | GGGGGGY   | 478.2045 | 506.1994 | GGGGGGYG   | 535.2259 | 563.2209 |
| GGGGGGYQ | 663.2845 | 691.2794 | GG        | 87.0553  | 115.0502 | GGG        | 144.0768 | 172.0717 |
| GGGG     | 201.0982 | 229.0931 | GGGGG     | 258.1197 | 286.1146 | GGGGGY     | 421.1830 | 449.1779 |
| GGGGGYG  | 478.2045 | 506.1994 | GGGGGYGQ  | 606.2631 | 634.2580 | GG         | 87.0553  | 115.0502 |
| GGG      | 144.0768 | 172.0717 | GGGG      | 201.0982 | 229.0931 | GGGGY      | 364.1615 | 392.1565 |
| GGGGY    | 421.1830 | 449.1779 | GGGGYQ    | 549.2416 | 577.2365 | GG         | 87.0553  | 115.0502 |
| GGG      | 144.0768 | 172.0717 | GGGY      | 307.1401 | 335.1350 | GGGY       | 364.1615 | 392.1565 |
| GGGYQ    | 492.2201 | 520.2150 | GG        | 87.0553  | 115.0502 | GGY        | 250.1186 | 278.1135 |
| GGY      | 307.1401 | 335.1350 | GGYQ      | 435.1987 | 463.1936 | GY         | 193.0972 | 221.0921 |
| GY       | 250.1186 | 278.1135 | GYQ       | 378.1772 | 406.1721 | YG         | 193.0972 | 221.0921 |
| YQ       | 321.1557 | 349.1506 | GQ        | 158.0924 | 186.0873 |            |          |          |

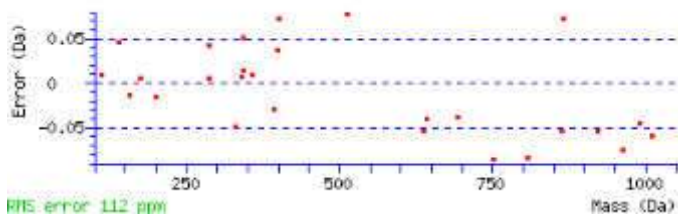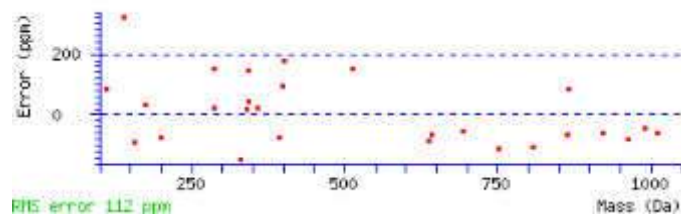

NCBI BLAST search of [RSGGGGGGGYGQR](#)

(Parameters: blastp, nr protein database, expect=20000, no filter, PAM30)

Other BLAST [web gateways](#)

#### All matches to this query

| Score | Mr(calc)  | Delta   | Sequence                       |
|-------|-----------|---------|--------------------------------|
| 30.3  | 1164.5385 | 0.0666  | <a href="#">RSGGGGGGGYGQR</a>  |
| 19.2  | 1164.5636 | 0.0414  | <a href="#">VGODSYRGAGR</a>    |
| 19.0  | 1164.5385 | 0.0666  | <a href="#">RSGGGGGGGAGYGR</a> |
| 15.9  | 1164.6251 | -0.0201 | <a href="#">RELVYTAASR</a>     |
| 15.9  | 1164.5974 | 0.0076  | <a href="#">RTLXSVIXR</a>      |
| 14.0  | 1164.5676 | 0.0374  | <a href="#">RPEDAFFQR</a>      |
| 14.0  | 1164.5709 | 0.0341  | <a href="#">RFIAENEMR</a>      |
| 13.9  | 1164.5128 | 0.0922  | <a href="#">REMMGGNSQR</a>     |
| 13.9  | 1164.6040 | 0.0011  | <a href="#">RENAYFPLR</a>      |
| 12.3  | 1164.6476 | -0.0425 | <a href="#">RPRVDAQPR</a>      |

Mascot: <http://www.matrixscience.com/>

**MATRIX SCIENCE Mascot Search Results**

**Peptide View Spot no 10**

MS/MS Fragmentation of **NITVNEAQSRR**

Found in **gi|18103931** in **NCBI**nr, glycine rich RNA binding protein [Oryza sativa Indica Group]

Match to Query 26: 1286.750124 from(1287.757400,1+) intensity(0.0000) index(11)  
 Title: Label: E6, Spot\_Id: 228926, Peak\_List\_Id: 257529, MSMS Job\_Run\_Id: 24923, Comment:  
 Data file ppw\_E6\_138985130300.txt

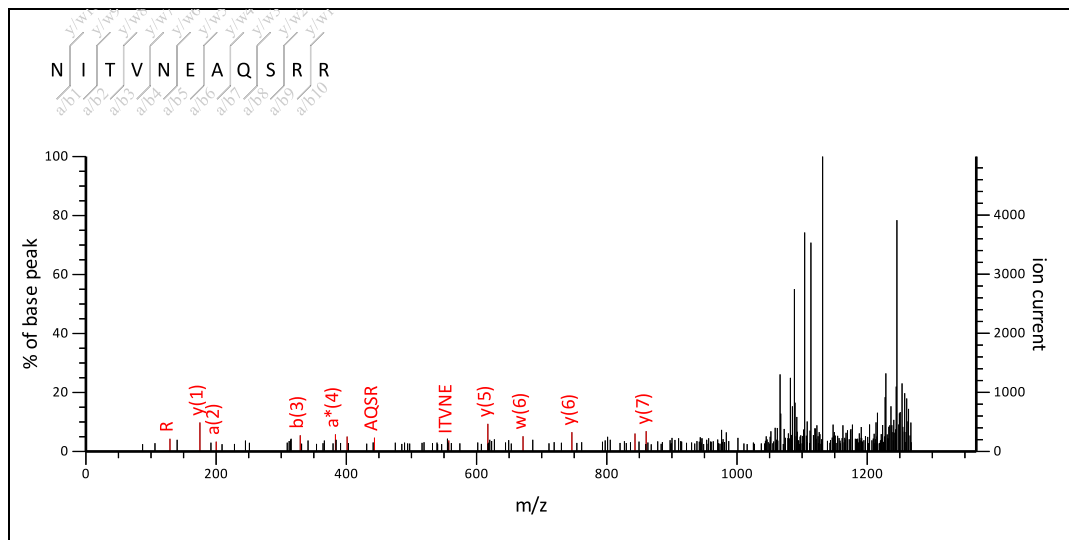

Navigation icons: ? Home Search Zoom In Zoom Out 0 to 1367.5

Label all possible matches  Label matches used for scoring

Monoisotopic mass of neutral peptide Mr(calc): 1286.6691  
 Fixed modifications: Carbamidomethyl (C) (apply to specified residues or termini only)  
 Ions Score: 10 Expect: 1.9e+02  
 Matches : 18/187 fragment ions using 24 most intense peaks (help)

| #  | Immon.   | a         | a*        | a <sup>0</sup> | b         | b*        | b <sup>0</sup> | d         | d'       | Seq. | v         | w         | w'        | y         | y*        |
|----|----------|-----------|-----------|----------------|-----------|-----------|----------------|-----------|----------|------|-----------|-----------|-----------|-----------|-----------|
| 1  | 87.0553  | 87.0553   | 70.0287   |                | 115.0502  | 98.0237   |                | 44.0495   |          | N    |           |           |           |           |           |
| 2  | 86.0964  | 200.1394  | 183.1128  |                | 228.1343  | 211.1077  |                | 172.1081  | 186.1237 | I    | 1115.5552 | 1128.5756 | 1142.5913 | 1173.6335 | 1156.6069 |
| 3  | 74.0600  | 301.1870  | 284.1605  | 283.1765       | 329.1819  | 312.1554  | 311.1714       | 285.1921  | 287.1714 | T    | 1014.5075 | 1027.5279 | 1029.5072 | 1060.5494 | 1043.5228 |
| 4  | 72.0808  | 400.2554  | 383.2289  | 382.2449       | 428.2504  | 411.2238  | 410.2398       | 386.2398  |          | V    | 915.4391  | 928.4595  |           | 959.5017  | 942.4752  |
| 5  | 87.0553  | 514.2984  | 497.2718  | 496.2878       | 542.2933  | 525.2667  | 524.2827       | 471.2926  |          | N    | 801.3962  | 800.4009  |           | 860.4333  | 843.4068  |
| 6  | 102.0550 | 643.3410  | 626.3144  | 625.3304       | 671.3359  | 654.3093  | 653.3253       | 585.3355  |          | E    | 672.3536  | 671.3583  |           | 746.3904  | 729.3638  |
| 7  | 44.0495  | 714.3781  | 697.3515  | 696.3675       | 742.3730  | 725.3464  | 724.3624       |           |          | A    | 601.3165  |           |           | 617.3478  | 600.3212  |
| 8  | 101.0709 | 842.4367  | 825.4101  | 824.4261       | 870.4316  | 853.4050  | 852.4210       | 785.4152  |          | Q    | 473.2579  | 472.2627  |           | 546.3107  | 529.2841  |
| 9  | 60.0444  | 929.4687  | 912.4421  | 911.4581       | 957.4636  | 940.4371  | 939.4530       | 913.4738  |          | S    | 386.2259  | 385.2306  |           | 418.2521  | 401.2255  |
| 10 | 129.1135 | 1085.5698 | 1068.5432 | 1067.5592      | 1113.5647 | 1096.5382 | 1095.5541      | 1000.5058 |          | R    | 230.1248  | 229.1295  |           | 331.2201  | 314.1935  |
| 11 | 129.1135 |           |           |                |           |           |                |           |          | R    | 74.0237   | 73.0284   |           | 175.1190  | 158.0924  |

| Seq    | ya       | yb       | Seq     | ya       | yb       | Seq    | ya       | yb       |
|--------|----------|----------|---------|----------|----------|--------|----------|----------|
| IT     | 187.1441 | 215.1390 | ITV     | 286.2125 | 314.2074 | ITVN   | 400.2554 | 428.2504 |
| ITVNE  | 529.2980 | 557.2930 | ITVNEA  | 600.3352 | 628.3301 | TV     | 173.1285 | 201.1234 |
| TVN    | 287.1714 | 315.1663 | TVNE    | 416.2140 | 444.2089 | TVNEA  | 487.2511 | 515.2460 |
| TVNEAQ | 615.3097 | 643.3046 | VN      | 186.1237 | 214.1186 | VNE    | 315.1663 | 343.1612 |
| VNEA   | 386.2034 | 414.1983 | VNEAQ   | 514.2620 | 542.2569 | VNEAQS | 601.2940 | 629.2889 |
| NE     | 216.0979 | 244.0928 | NEA     | 287.1350 | 315.1299 | NEAQ   | 415.1936 | 443.1885 |
| NEAQS  | 502.2256 | 530.2205 | NEAQSRR | 658.3267 | 686.3216 | EA     | 173.0921 | 201.0870 |
| EAQ    | 301.1506 | 329.1456 | EAQS    | 388.1827 | 416.1776 | EAQSRR | 544.2838 | 572.2787 |
| AQ     | 172.1081 | 200.1030 | AQS     | 259.1401 | 287.1350 | AQSRR  | 415.2412 | 443.2361 |

QS | 188.1030 | 216.0979 | QSR | 344.2041 | 372.1990 | SR | 216.1455 | 244.1404

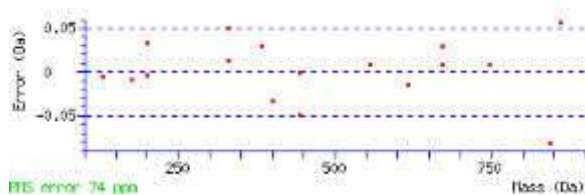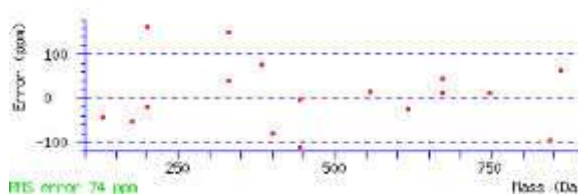

NCBI BLAST search of [NITVNEAQSRR](#)

(Parameters: blastp, nr protein database, expect=20000, no filter, PAM30)

Other BLAST [web gateways](#)

All matches to this query

| Score | Mr(calc)  | Delta  | Sequence                     |
|-------|-----------|--------|------------------------------|
| 16.8  | 1286.6579 | 0.0923 | <a href="#">RGQSIEVVDER</a>  |
| 15.1  | 1286.6983 | 0.0519 | <a href="#">GVATALNFPLER</a> |
| 14.7  | 1286.6830 | 0.0671 | <a href="#">RATVNEDEILK</a>  |
| 14.5  | 1286.6731 | 0.0770 | <a href="#">RSPSPAPPEPR</a>  |
| 11.2  | 1286.6466 | 0.1035 | <a href="#">AIASQLANQDEK</a> |
| 11.0  | 1286.6830 | 0.0671 | <a href="#">LNEVOSSLER</a>   |
| 10.9  | 1286.7194 | 0.0307 | <a href="#">KVLGEGSLSLER</a> |
| 10.8  | 1286.6691 | 0.0810 | <a href="#">QVTVNEAQSRR</a>  |
| 10.4  | 1286.6691 | 0.0810 | <a href="#">NITVNEAQSRR</a>  |
| 10.1  | 1286.6327 | 0.1174 | <a href="#">RQEQESAAAAAR</a> |

Mascot: <http://www.matrixscience.com>



# MATRIX SCIENCE Mascot Search Results

## Peptide View **Spot no 10**

MS/MS Fragmentation of **GGGGYGGGGYGGGGGGGGYQ R**

Found in **gi|18103931** in **NCBI nr**, glycine rich RNA binding protein [Oryza sativa Indica Group]

Match to Query 46: 1817.858424 from(1818.865700,1+) intensity(0.0000) index(21)

Title: Label: E6, Spot\_Id: 228926, Peak\_List\_Id: 257514, MSMS Job\_Run\_Id: 24923, Comment:

Data file ppw\_E6\_138985130300.txt

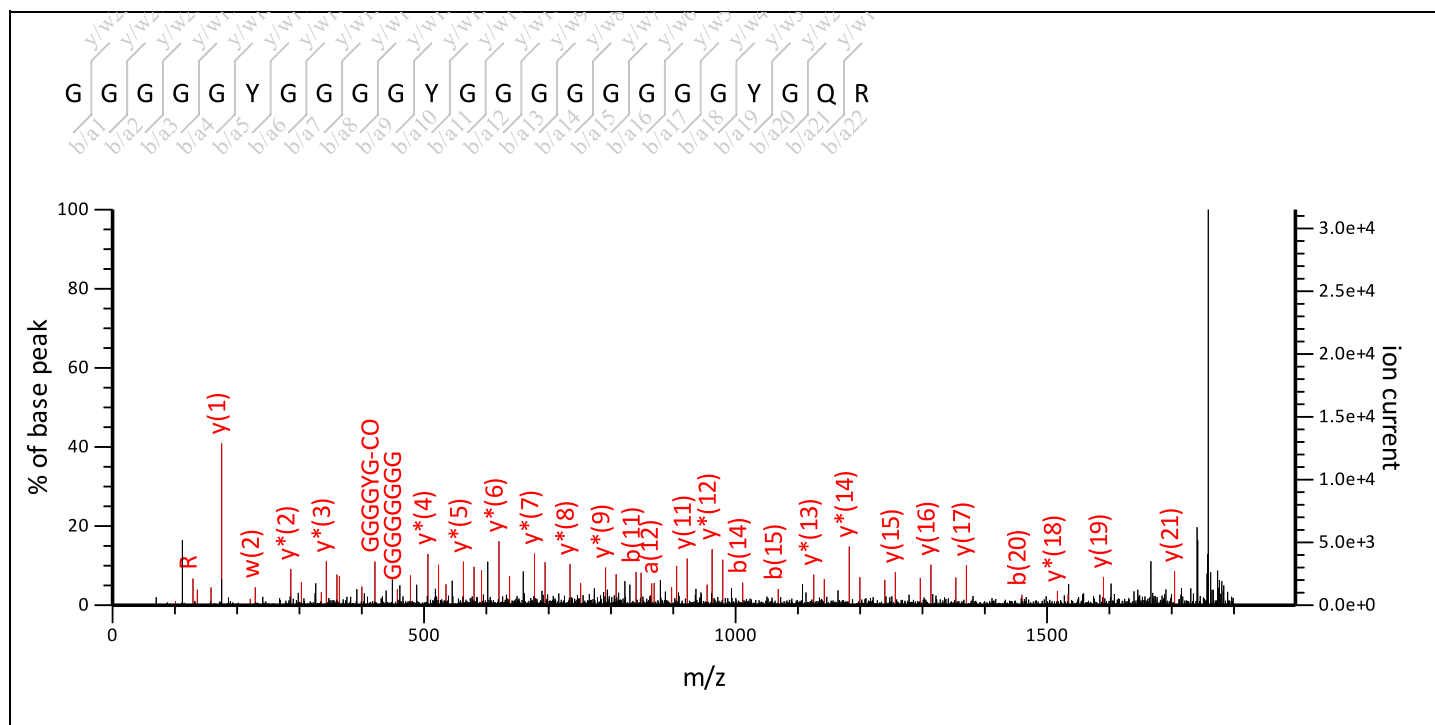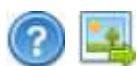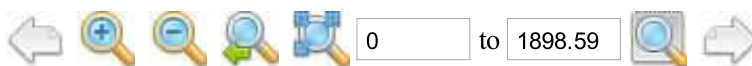

Label all possible matches  Label matches used for scoring

**Monoisotopic mass of neutral peptide Mr(calc):** 1817.7467

**Fixed modifications:** Carbamidomethyl (C) (apply to specified residues or termini only)

**Ions Score:** 124 **Expect:** 8.8e-10

**Matches :** 207/392 fragment ions using 126 most intense peaks ([help](#))

| # | Immon.          | a               | a* | b               | b* | d       | Seq. | v         | w | y                | y*               | #  |
|---|-----------------|-----------------|----|-----------------|----|---------|------|-----------|---|------------------|------------------|----|
| 1 | 30.0338         | 30.0338         |    | 58.0287         |    | 44.0495 | G    |           |   |                  |                  | 23 |
| 2 | 30.0338         | 87.0553         |    | 115.0502        |    |         | G    |           |   | 1761.7324        | 1744.7059        | 22 |
| 3 | 30.0338         | 144.0768        |    | 172.0717        |    |         | G    |           |   | <b>1704.7109</b> | 1687.6844        | 21 |
| 4 | 30.0338         | 201.0982        |    | <b>229.0931</b> |    |         | G    |           |   | 1647.6895        | 1630.6629        | 20 |
| 5 | 30.0338         | 258.1197        |    | <b>286.1146</b> |    |         | G    |           |   | <b>1590.6680</b> | 1573.6415        | 19 |
| 6 | <b>136.0757</b> | <b>421.1830</b> |    | <b>449.1779</b> |    |         | Y    | 1425.5890 |   | <b>1533.6465</b> | <b>1516.6200</b> | 18 |
| 7 | 30.0338         | <b>478.2045</b> |    | <b>506.1994</b> |    |         | G    |           |   | <b>1370.5832</b> | <b>1353.5567</b> | 17 |
| 8 | 30.0338         | <b>535.2259</b> |    | <b>563.2209</b> |    |         | G    |           |   | <b>1313.5618</b> | <b>1296.5352</b> | 16 |

|    |                 |                 |           |                  |           |           |  |  |          |           |                 |                  |           |           |
|----|-----------------|-----------------|-----------|------------------|-----------|-----------|--|--|----------|-----------|-----------------|------------------|-----------|-----------|
| 9  | 30.0338         | <b>592.2474</b> |           | <b>620.2423</b>  |           |           |  |  | <b>G</b> |           |                 | <b>1256.5403</b> | 1239.5137 | <b>15</b> |
| 10 | 30.0338         | 649.2689        |           | <b>677.2638</b>  |           |           |  |  | <b>G</b> |           |                 | <b>1199.5188</b> | 1182.4923 | <b>14</b> |
| 11 | <b>136.0757</b> | 812.3322        |           | <b>840.3271</b>  |           |           |  |  | <b>Y</b> | 1034.4398 |                 | <b>1142.4974</b> | 1125.4708 | <b>13</b> |
| 12 | 30.0338         | <b>869.3537</b> |           | <b>897.3486</b>  |           |           |  |  | <b>G</b> |           |                 | <b>979.4340</b>  | 962.4075  | <b>12</b> |
| 13 | 30.0338         | 926.3751        |           | <b>954.3700</b>  |           |           |  |  | <b>G</b> |           |                 | <b>922.4126</b>  | 905.3860  | <b>11</b> |
| 14 | 30.0338         | 983.3966        |           | <b>1011.3915</b> |           |           |  |  | <b>G</b> |           |                 | <b>865.3911</b>  | 848.3646  | <b>10</b> |
| 15 | 30.0338         | 1040.4181       |           | <b>1068.4130</b> |           |           |  |  | <b>G</b> |           |                 | <b>808.3696</b>  | 791.3431  | <b>9</b>  |
| 16 | 30.0338         | 1097.4395       |           | <b>1125.4344</b> |           |           |  |  | <b>G</b> |           |                 | <b>751.3482</b>  | 734.3216  | <b>8</b>  |
| 17 | 30.0338         | 1154.4610       |           | <b>1182.4559</b> |           |           |  |  | <b>G</b> |           |                 | <b>694.3267</b>  | 677.3002  | <b>7</b>  |
| 18 | 30.0338         | 1211.4824       |           | <b>1239.4774</b> |           |           |  |  | <b>G</b> |           |                 | <b>637.3053</b>  | 620.2787  | <b>6</b>  |
| 19 | 30.0338         | 1268.5039       |           | <b>1296.4988</b> |           |           |  |  | <b>G</b> |           |                 | <b>580.2838</b>  | 563.2572  | <b>5</b>  |
| 20 | <b>136.0757</b> | 1431.5672       |           | <b>1459.5622</b> |           |           |  |  | <b>Y</b> | 415.2048  |                 | <b>523.2623</b>  | 506.2358  | <b>4</b>  |
| 21 | 30.0338         | 1488.5887       |           | <b>1516.5836</b> |           |           |  |  | <b>G</b> |           |                 | <b>360.1990</b>  | 343.1724  | <b>3</b>  |
| 22 | <b>101.0709</b> | 1616.6473       | 1599.6207 | 1644.6422        | 1627.6156 | 1559.6258 |  |  | <b>Q</b> | 230.1248  | <b>229.1295</b> | <b>303.1775</b>  | 286.1510  | <b>2</b>  |
| 23 | <b>129.1135</b> |                 |           |                  |           |           |  |  | <b>R</b> | 74.0237   | 73.0284         | <b>175.1190</b>  | 158.0924  | <b>1</b>  |

| Seq               | ya              | yb              | Seq              | ya              | yb              | Seq              | ya              | yb              |
|-------------------|-----------------|-----------------|------------------|-----------------|-----------------|------------------|-----------------|-----------------|
| <b>GG</b>         | 87.0553         | 115.0502        | <b>GGG</b>       | 144.0768        | 172.0717        | <b>GGGG</b>      | 201.0982        | <b>229.0931</b> |
| <b>GGGGY</b>      | <b>364.1615</b> | <b>392.1565</b> | <b>GGGGYG</b>    | <b>421.1830</b> | <b>449.1779</b> | <b>GGGGYGG</b>   | <b>478.2045</b> | <b>506.1994</b> |
| <b>GGGGYGGG</b>   | <b>535.2259</b> | <b>563.2209</b> | <b>GGGGYGGGG</b> | <b>592.2474</b> | <b>620.2423</b> | <b>GG</b>        | 87.0553         | 115.0502        |
| <b>GGG</b>        | 144.0768        | 172.0717        | <b>GGGY</b>      | 307.1401        | <b>335.1350</b> | <b>GGGYG</b>     | <b>364.1615</b> | <b>392.1565</b> |
| <b>GGGYGG</b>     | <b>421.1830</b> | <b>449.1779</b> | <b>GGGYGGG</b>   | <b>478.2045</b> | <b>506.1994</b> | <b>GGGYGGGG</b>  | <b>535.2259</b> | <b>563.2209</b> |
| <b>GGGYGGGGY</b>  | 698.2893        | 726.2842        | <b>GG</b>        | 87.0553         | 115.0502        | <b>GGY</b>       | 250.1186        | 278.1135        |
| <b>GGYG</b>       | 307.1401        | <b>335.1350</b> | <b>GGYGG</b>     | <b>364.1615</b> | <b>392.1565</b> | <b>GGYGGG</b>    | <b>421.1830</b> | <b>449.1779</b> |
| <b>GGYGGGG</b>    | <b>478.2045</b> | <b>506.1994</b> | <b>GGYGGGGY</b>  | 641.2678        | 669.2627        | <b>GGYGGGGYG</b> | 698.2893        | 726.2842        |
| <b>GY</b>         | 193.0972        | <b>221.0921</b> | <b>GYG</b>       | 250.1186        | 278.1135        | <b>GYGG</b>      | 307.1401        | <b>335.1350</b> |
| <b>GYGGG</b>      | <b>364.1615</b> | <b>392.1565</b> | <b>GYGGGG</b>    | <b>421.1830</b> | <b>449.1779</b> | <b>GYGGGGY</b>   | 584.2463        | 612.2413        |
| <b>GYGGGGYG</b>   | 641.2678        | 669.2627        | <b>GYGGGGYGG</b> | 698.2893        | 726.2842        | <b>YG</b>        | 193.0972        | <b>221.0921</b> |
| <b>YGG</b>        | 250.1186        | 278.1135        | <b>YGGG</b>      | 307.1401        | <b>335.1350</b> | <b>YGGGG</b>     | <b>364.1615</b> | <b>392.1565</b> |
| <b>YGGGGY</b>     | 527.2249        | 555.2198        | <b>YGGGGYG</b>   | 584.2463        | 612.2413        | <b>YGGGGYGG</b>  | 641.2678        | 669.2627        |
| <b>YGGGGYGGG</b>  | 698.2893        | 726.2842        | <b>GG</b>        | 87.0553         | 115.0502        | <b>GGG</b>       | 144.0768        | 172.0717        |
| <b>GGGG</b>       | 201.0982        | <b>229.0931</b> | <b>GGGGY</b>     | <b>364.1615</b> | <b>392.1565</b> | <b>GGGGYG</b>    | <b>421.1830</b> | <b>449.1779</b> |
| <b>GGGGYGG</b>    | <b>478.2045</b> | <b>506.1994</b> | <b>GGGGYGGG</b>  | <b>535.2259</b> | <b>563.2209</b> | <b>GGGGYGGGG</b> | <b>592.2474</b> | <b>620.2423</b> |
| <b>GGGGYGGGGG</b> | 649.2689        | <b>677.2638</b> | <b>GG</b>        | 87.0553         | 115.0502        | <b>GGG</b>       | 144.0768        | 172.0717        |
| <b>GGGY</b>       | 307.1401        | <b>335.1350</b> | <b>GGGYG</b>     | <b>364.1615</b> | <b>392.1565</b> | <b>GGGYGG</b>    | <b>421.1830</b> | <b>449.1779</b> |
| <b>GGGYGGG</b>    | <b>478.2045</b> | <b>506.1994</b> | <b>GGGYGGGG</b>  | <b>535.2259</b> | <b>563.2209</b> | <b>GGGYGGGGG</b> | <b>592.2474</b> | <b>620.2423</b> |
| <b>GGGYGGGGGG</b> | 649.2689        | <b>677.2638</b> | <b>GG</b>        | 87.0553         | 115.0502        | <b>GGY</b>       | 250.1186        | 278.1135        |
| <b>GGYG</b>       | 307.1401        | <b>335.1350</b> | <b>GGYGG</b>     | <b>364.1615</b> | <b>392.1565</b> | <b>GGYGGG</b>    | <b>421.1830</b> | <b>449.1779</b> |
| <b>GGYGGGG</b>    | <b>478.2045</b> | <b>506.1994</b> | <b>GGYGGGGG</b>  | <b>535.2259</b> | <b>563.2209</b> | <b>GGYGGGGGG</b> | <b>592.2474</b> | <b>620.2423</b> |
| <b>GGYGGGGGGG</b> | 649.2689        | <b>677.2638</b> | <b>GY</b>        | 193.0972        | <b>221.0921</b> | <b>GYG</b>       | 250.1186        | 278.1135        |
| <b>GYGG</b>       | 307.1401        | <b>335.1350</b> | <b>GYGGG</b>     | <b>364.1615</b> | <b>392.1565</b> | <b>GYGGGG</b>    | <b>421.1830</b> | <b>449.1779</b> |

|                   |          |          |                  |          |          |                   |          |          |
|-------------------|----------|----------|------------------|----------|----------|-------------------|----------|----------|
| <b>GYGGGGG</b>    | 478.2045 | 506.1994 | <b>GYGGGGGG</b>  | 535.2259 | 563.2209 | <b>GYGGGGGGG</b>  | 592.2474 | 620.2423 |
| <b>GYGGGGGGGG</b> | 649.2689 | 677.2638 | <b>YG</b>        | 193.0972 | 221.0921 | <b>YGG</b>        | 250.1186 | 278.1135 |
| <b>YGGG</b>       | 307.1401 | 335.1350 | <b>YGGGG</b>     | 364.1615 | 392.1565 | <b>YGGGGG</b>     | 421.1830 | 449.1779 |
| <b>YGGGGG</b>     | 478.2045 | 506.1994 | <b>YGGGGGG</b>   | 535.2259 | 563.2209 | <b>YGGGGGGG</b>   | 592.2474 | 620.2423 |
| <b>GG</b>         | 87.0553  | 115.0502 | <b>GGG</b>       | 144.0768 | 172.0717 | <b>GGGG</b>       | 201.0982 | 229.0931 |
| <b>GGGG</b>       | 258.1197 | 286.1146 | <b>GGGGG</b>     | 315.1411 | 343.1361 | <b>GGGGGG</b>     | 372.1626 | 400.1575 |
| <b>GGGGGGG</b>    | 429.1841 | 457.1790 | <b>GGGGGGGGY</b> | 592.2474 | 620.2423 | <b>GGGGGGGGGY</b> | 649.2689 | 677.2638 |
| <b>GG</b>         | 87.0553  | 115.0502 | <b>GGG</b>       | 144.0768 | 172.0717 | <b>GGGG</b>       | 201.0982 | 229.0931 |
| <b>GGGG</b>       | 258.1197 | 286.1146 | <b>GGGGG</b>     | 315.1411 | 343.1361 | <b>GGGGGG</b>     | 372.1626 | 400.1575 |
| <b>GGGGGGGY</b>   | 535.2259 | 563.2209 | <b>GGGGGGGYG</b> | 592.2474 | 620.2423 | <b>GG</b>         | 87.0553  | 115.0502 |
| <b>GGG</b>        | 144.0768 | 172.0717 | <b>GGGG</b>      | 201.0982 | 229.0931 | <b>GGGGG</b>      | 258.1197 | 286.1146 |
| <b>GGGGG</b>      | 315.1411 | 343.1361 | <b>GGGGGGY</b>   | 478.2045 | 506.1994 | <b>GGGGGGYG</b>   | 535.2259 | 563.2209 |
| <b>GGGGGGYGQ</b>  | 663.2845 | 691.2794 | <b>GG</b>        | 87.0553  | 115.0502 | <b>GGG</b>        | 144.0768 | 172.0717 |
| <b>GGGG</b>       | 201.0982 | 229.0931 | <b>GGGGG</b>     | 258.1197 | 286.1146 | <b>GGGGGY</b>     | 421.1830 | 449.1779 |
| <b>GGGGGYG</b>    | 478.2045 | 506.1994 | <b>GGGGGYGQ</b>  | 606.2631 | 634.2580 | <b>GG</b>         | 87.0553  | 115.0502 |
| <b>GGG</b>        | 144.0768 | 172.0717 | <b>GGGG</b>      | 201.0982 | 229.0931 | <b>GGGGY</b>      | 364.1615 | 392.1565 |
| <b>GGGGYG</b>     | 421.1830 | 449.1779 | <b>GGGGYGQ</b>   | 549.2416 | 577.2365 | <b>GG</b>         | 87.0553  | 115.0502 |
| <b>GGG</b>        | 144.0768 | 172.0717 | <b>GGGY</b>      | 307.1401 | 335.1350 | <b>GGGYG</b>      | 364.1615 | 392.1565 |
| <b>GGGYGQ</b>     | 492.2201 | 520.2150 | <b>GG</b>        | 87.0553  | 115.0502 | <b>GGY</b>        | 250.1186 | 278.1135 |
| <b>GGYG</b>       | 307.1401 | 335.1350 | <b>GGYGQ</b>     | 435.1987 | 463.1936 | <b>GY</b>         | 193.0972 | 221.0921 |
| <b>GYG</b>        | 250.1186 | 278.1135 | <b>GYGQ</b>      | 378.1772 | 406.1721 | <b>YG</b>         | 193.0972 | 221.0921 |
| <b>YGQ</b>        | 321.1557 | 349.1506 | <b>GQ</b>        | 158.0924 | 186.0873 |                   |          |          |

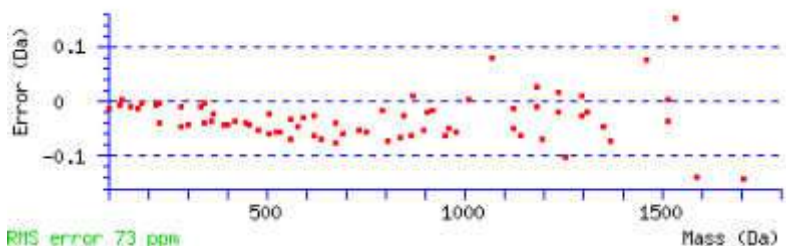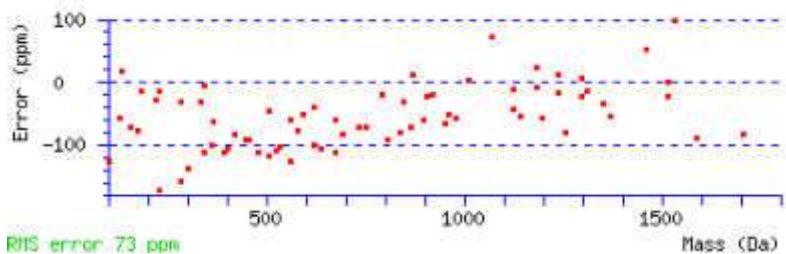

NCBI **BLAST** search of [GGGGGYGGGGYGGGGGGGGYGQR](#)  
 (Parameters: blastp, nr protein database, expect=20000, no filter, PAM30)  
 Other BLAST [web gateways](#)

**All matches to this query**

| Score | Mr(calc)  | Delta  | Sequence                                |
|-------|-----------|--------|-----------------------------------------|
| 123.7 | 1817.7467 | 0.1118 | <a href="#">GGGGGYGGGGYGGGGGGGGYGQR</a> |

|       |           |         |                                         |
|-------|-----------|---------|-----------------------------------------|
| 115.9 | 1817.7467 | 0.1118  | <a href="#">GGGGGYGGGGGYGGGGGGGYGQR</a> |
| 17.8  | 1817.7360 | 0.1224  | <a href="#">GDHGNGRGNDEGMNHHR</a>       |
| 14.6  | 1817.7825 | 0.0759  | <a href="#">WVCEGAGPPGGMGESTAR</a>      |
| 14.5  | 1817.9577 | -0.0993 | <a href="#">QGVIFLTDHGFFPGKR</a>        |
| 13.0  | 1817.8472 | 0.0112  | <a href="#">NFPIYSDGLYTESGQK</a>        |
| 12.8  | 1817.8584 | -0.0000 | <a href="#">DFIFGVSSAYQVEGGR</a>        |
| 12.6  | 1817.8730 | -0.0146 | <a href="#">ASMKEEHSLIGGPGFSR</a>       |
| 12.3  | 1817.7937 | 0.0647  | <a href="#">NNNFTVSAMHGDMPCR</a>        |
| 11.1  | 1817.9247 | -0.0663 | <a href="#">VLRMHGYEVTPDVER</a>         |

**Mascot:** <http://www.matrixscience.com/>


**Mascot Search Results**
**Peptide View Spot no 10**

 MS/MS Fragmentation of **CFVGGLAWATDDR**

 Found in **gi|18103931** in **NCBI nr**, glycine rich RNA binding protein [Oryza sativa Indica Group]

Match to Query 34: 1466.759724 from(1467.767000,1+) intensity(0.0000) index(15)

Title: Label: E6, Spot\_Id: 228926, Peak\_List\_Id: 257530, MSMS Job\_Run\_Id: 24923, Comment:

Data file ppw\_E6\_138985130300.txt

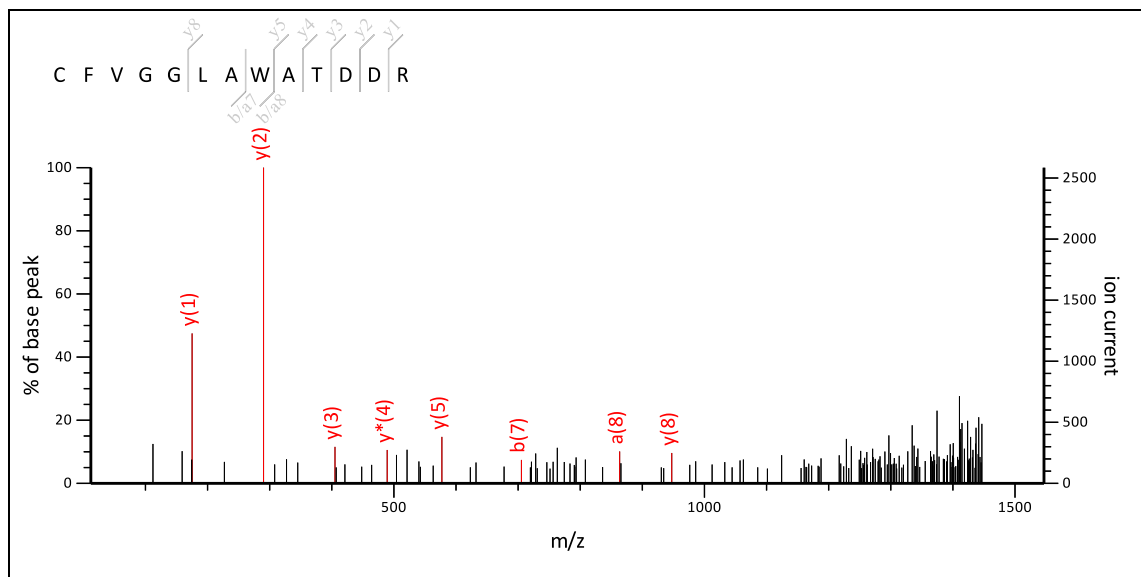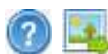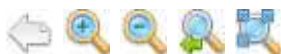

12.09 to 1546.66

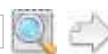
 Label all possible matches  Label matches used for scoring 

 Monoisotopic mass of neutral peptide  $M_r(\text{calc})$ : 1466.6613

Fixed modifications: Carbamidomethyl (C) (apply to specified residues or termini only)

Ions Score: 25 Expect: 7.9

 Matches : 8/187 fragment ions using 14 most intense peaks ([help](#))

| #  | Immon.   | a         | a <sup>0</sup> | b         | b <sup>0</sup> | d         | d'        | Seq. | v         | w         | w'       | y         | y*        | y <sup>0</sup> | #  |
|----|----------|-----------|----------------|-----------|----------------|-----------|-----------|------|-----------|-----------|----------|-----------|-----------|----------------|----|
| 1  | 133.0430 | 133.0430  |                | 161.0379  |                | 44.0495   |           | C    |           |           |          |           |           |                | 13 |
| 2  | 120.0808 | 280.1114  |                | 308.1063  |                |           |           | F    | 1215.5753 |           |          | 1307.6379 | 1290.6113 | 1289.6273      | 12 |
| 3  | 72.0808  | 379.1798  |                | 407.1748  |                | 365.1642  |           | V    | 1116.5069 | 1129.5273 |          | 1160.5695 | 1143.5429 | 1142.5589      | 11 |
| 4  | 30.0338  | 436.2013  |                | 464.1962  |                |           |           | G    |           |           |          | 1061.5011 | 1044.4745 | 1043.4905      | 10 |
| 5  | 30.0338  | 493.2228  |                | 521.2177  |                |           |           | G    |           |           |          | 1004.4796 | 987.4530  | 986.4690       | 9  |
| 6  | 86.0964  | 606.3068  |                | 634.3017  |                | 564.2599  |           | L    | 889.3799  | 888.3846  |          | 947.4581  | 930.4316  | 929.4476       | 8  |
| 7  | 44.0495  | 677.3439  |                | 705.3389  |                |           |           | A    | 818.3428  |           |          | 834.3741  | 817.3475  | 816.3635       | 7  |
| 8  | 159.0917 | 863.4233  |                | 891.4182  |                |           |           | W    | 632.2634  |           |          | 763.3369  | 746.3104  | 745.3264       | 6  |
| 9  | 44.0495  | 934.4604  |                | 962.4553  |                |           |           | A    | 561.2263  |           |          | 577.2576  | 560.2311  | 559.2471       | 5  |
| 10 | 74.0600  | 1035.5081 | 1017.4975      | 1063.5030 | 1045.4924      | 1019.5131 | 1021.4924 | T    | 460.1787  | 473.1991  | 475.1783 | 506.2205  | 489.1940  | 488.2100       | 4  |
| 11 | 88.0393  | 1150.5350 | 1132.5244      | 1178.5299 | 1160.5193      | 1106.5452 |           | D    | 345.1517  | 344.1565  |          | 405.1728  | 388.1463  | 387.1623       | 3  |
| 12 | 88.0393  | 1265.5619 | 1247.5514      | 1293.5569 | 1275.5463      | 1221.5721 |           | D    | 230.1248  | 229.1295  |          | 290.1459  | 273.1193  | 272.1353       | 2  |
| 13 | 129.1135 |           |                |           |                |           |           | R    | 74.0237   | 73.0284   |          | 175.1190  | 158.0924  |                | 1  |

| Seq   | ya       | yb       | Seq    | ya       | yb       | Seq   | ya       | yb       |
|-------|----------|----------|--------|----------|----------|-------|----------|----------|
| FV    | 219.1492 | 247.1441 | FVG    | 276.1707 | 304.1656 | FVGG  | 333.1921 | 361.1870 |
| FVGGL | 446.2762 | 474.2711 | FVGGLA | 517.3133 | 545.3082 | VG    | 129.1022 | 157.0972 |
| VGG   | 186.1237 | 214.1186 | VGGL   | 299.2078 | 327.2027 | VGGLA | 370.2449 | 398.2398 |

|                        |          |          |                         |          |          |                        |          |          |
|------------------------|----------|----------|-------------------------|----------|----------|------------------------|----------|----------|
| <a href="#">VGGLAW</a> | 556.3242 | 584.3191 | <a href="#">VGGLAWA</a> | 627.3613 | 655.3562 | <a href="#">GG</a>     | 87.0553  | 115.0502 |
| <a href="#">GGL</a>    | 200.1394 | 228.1343 | <a href="#">GGLA</a>    | 271.1765 | 299.1714 | <a href="#">GGLAW</a>  | 457.2558 | 485.2507 |
| <a href="#">GGLAWA</a> | 528.2929 | 556.2878 | <a href="#">GGLAWAT</a> | 629.3406 | 657.3355 | <a href="#">GL</a>     | 143.1179 | 171.1128 |
| <a href="#">GLA</a>    | 214.1550 | 242.1499 | <a href="#">GLAW</a>    | 400.2343 | 428.2292 | <a href="#">GLAWA</a>  | 471.2714 | 499.2663 |
| <a href="#">GLAWAT</a> | 572.3191 | 600.3140 | <a href="#">GLAWATD</a> | 687.3461 | 715.3410 | <a href="#">LA</a>     | 157.1335 | 185.1285 |
| <a href="#">LAW</a>    | 343.2129 | 371.2078 | <a href="#">LAWA</a>    | 414.2500 | 442.2449 | <a href="#">LAWAT</a>  | 515.2976 | 543.2926 |
| <a href="#">LAWATD</a> | 630.3246 | 658.3195 | <a href="#">AW</a>      | 230.1288 | 258.1237 | <a href="#">AWA</a>    | 301.1659 | 329.1608 |
| <a href="#">AWAT</a>   | 402.2136 | 430.2085 | <a href="#">AWATD</a>   | 517.2405 | 545.2354 | <a href="#">AWATDD</a> | 632.2675 | 660.2624 |
| <a href="#">WA</a>     | 230.1288 | 258.1237 | <a href="#">WAT</a>     | 331.1765 | 359.1714 | <a href="#">WATD</a>   | 446.2034 | 474.1983 |
| <a href="#">WATDD</a>  | 561.2304 | 589.2253 | <a href="#">AT</a>      | 145.0972 | 173.0921 | <a href="#">ATD</a>    | 260.1241 | 288.1190 |
| <a href="#">ATDD</a>   | 375.1510 | 403.1460 | <a href="#">TD</a>      | 189.0870 | 217.0819 | <a href="#">TDD</a>    | 304.1139 | 332.1088 |
| <a href="#">DD</a>     | 203.0662 | 231.0612 |                         |          |          |                        |          |          |

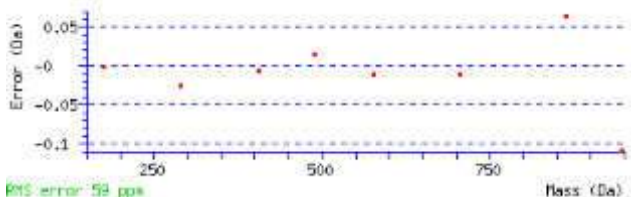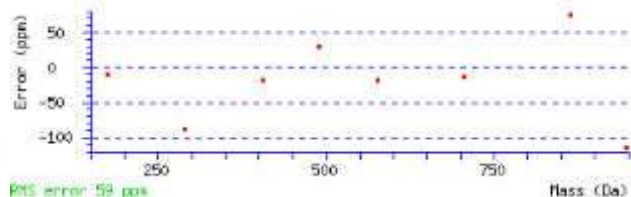

NCBI BLAST search of [CFVGGGLAWATDDR](#)

(Parameters: blastp, nr protein database, expect=20000, no filter, PAM30)

Other BLAST [web gateways](#)

#### All matches to this query

| Score | Mr(calc)  | Delta  | Sequence                       |
|-------|-----------|--------|--------------------------------|
| 24.9  | 1466.6613 | 0.0985 | <a href="#">CFVGGGLAWATDDR</a> |
| 14.9  | 1466.6274 | 0.1323 | <a href="#">GNVFTADADADTDR</a> |
| 11.0  | 1466.6638 | 0.0960 | <a href="#">GLVSYGDASPDGSR</a> |
| 9.2   | 1466.6903 | 0.0695 | <a href="#">GGQFSRPFVSDDR</a>  |
| 9.1   | 1466.6691 | 0.0906 | <a href="#">GYNAEGWRFDPDR</a>  |
| 8.1   | 1466.7551 | 0.0046 | <a href="#">GKQIMEIGDSISR</a>  |
| 8.1   | 1466.6282 | 0.1315 | <a href="#">GLMTSDAEMWNGR</a>  |
| 8.1   | 1466.6686 | 0.0911 | <a href="#">GTPYWMAPEMIR</a>   |
| 7.7   | 1466.6613 | 0.0985 | <a href="#">HGFDVVSQDIFMR</a>  |
| 7.7   | 1466.6671 | 0.0926 | <a href="#">KLSMDASTQTDDR</a>  |

Mascot: <http://www.matrixscience.com/>

# MATRIX SCIENCE Mascot Search Results

## Peptide View **Spot no 13**

MS/MS Fragmentation of **QIPLSGPNSVVGR**

Found in **gi|42408425** in **NCBI nr**, putative superoxide dismutase [Cu-Zn], chloroplast precursor [Oryza sativa Japonica Group]

Match to Query 216: 1322.758024 from(1323.765300,1+) intensity(0.0000) index(23)

Title: Label: G6, Spot\_Id: 219760, Peak\_List\_Id: 225740, MSMS Job\_Run\_Id: 21788, Comment:

Data file C:\Documents and Settings\Administrator\Desktop\farah BHU\spot set plate\Farah-Garima 11May

2013\ppw\_G6\_136842238300.txt

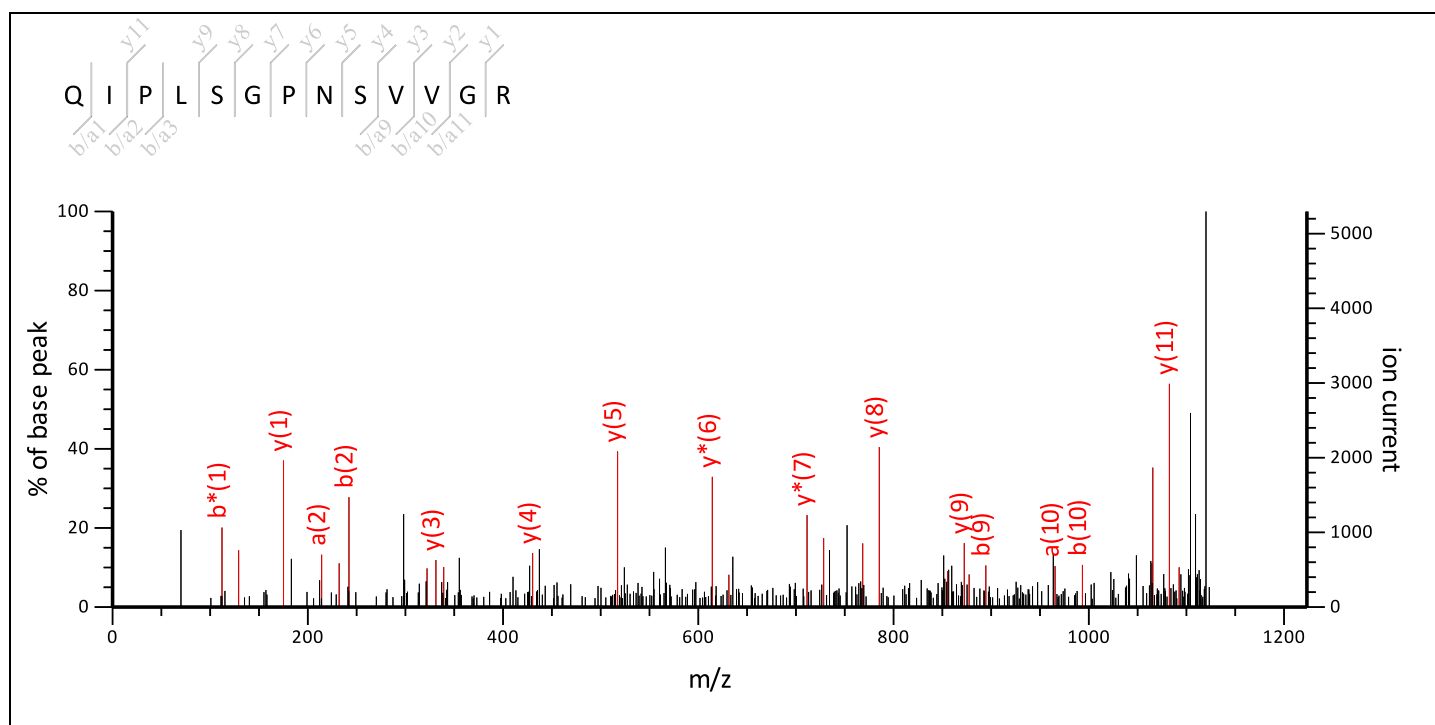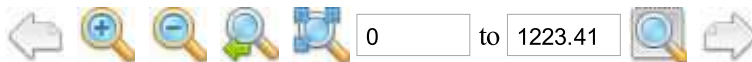

Label all possible matches  Label matches used for scoring

**Monoisotopic mass of neutral peptide Mr(calc):** 1322.7307

**Fixed modifications:** Carbamidomethyl (C) (apply to specified residues or termini only)

**Ions Score:** 59 **Expect:** 0.0022

**Matches:** 27/72 fragment ions using 55 most intense peaks ([help](#))

| # | a               | a*       | b               | b*              | Seq.     | y                | y*               | #         |
|---|-----------------|----------|-----------------|-----------------|----------|------------------|------------------|-----------|
| 1 | 101.0709        | 84.0444  | <b>129.0659</b> | <b>112.0393</b> | <b>Q</b> |                  |                  | <b>13</b> |
| 2 | <b>214.1550</b> | 197.1285 | <b>242.1499</b> | 225.1234        | <b>I</b> | 1195.6793        | 1178.6528        | <b>12</b> |
| 3 | 311.2078        | 294.1812 | <b>339.2027</b> | <b>322.1761</b> | <b>P</b> | <b>1082.5953</b> | <b>1065.5687</b> | <b>11</b> |
| 4 | 424.2918        | 407.2653 | 452.2867        | 435.2602        | <b>L</b> | 985.5425         | 968.5160         | <b>10</b> |
| 5 | 511.3239        | 494.2973 | 539.3188        | 522.2922        | <b>S</b> | <b>872.4585</b>  | <b>855.4319</b>  | <b>9</b>  |
| 6 | 568.3453        | 551.3188 | 596.3402        | 579.3137        | <b>G</b> | <b>785.4264</b>  | <b>768.3999</b>  | <b>8</b>  |
| 7 | 665.3981        | 648.3715 | 693.3930        | 676.3665        | <b>P</b> | <b>728.4050</b>  | <b>711.3784</b>  | <b>7</b>  |



|    |                  |           |                  |                 |   |                 |                 |   |
|----|------------------|-----------|------------------|-----------------|---|-----------------|-----------------|---|
| 8  | 779.4410         | 762.4145  | 807.4359         | 790.4094        | N | <b>631.3522</b> | <b>614.3256</b> | 6 |
| 9  | 866.4730         | 849.4465  | <b>894.4680</b>  | <b>877.4414</b> | S | <b>517.3093</b> | 500.2827        | 5 |
| 10 | <b>965.5415</b>  | 948.5149  | <b>993.5364</b>  | 976.5098        | V | <b>430.2772</b> | 413.2507        | 4 |
| 11 | <b>1064.6099</b> | 1047.5833 | <b>1092.6048</b> | 1075.5782       | V | <b>331.2088</b> | 314.1823        | 3 |
| 12 | 1121.6313        | 1104.6048 | 1149.6262        | 1132.5997       | G | <b>232.1404</b> | 215.1139        | 2 |
| 13 |                  |           |                  |                 | R | <b>175.1190</b> | 158.0924        | 1 |

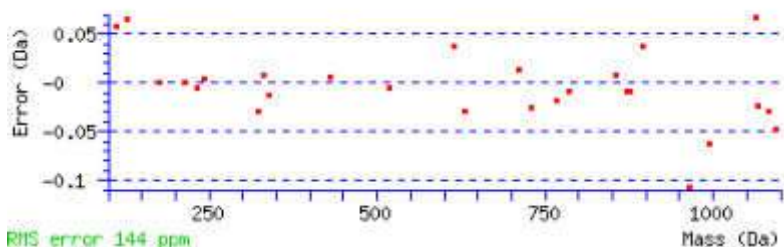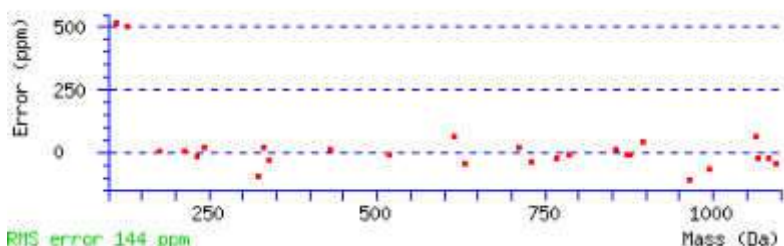

NCBI BLAST search of [QIPLSGPNSVVGR](#)

(Parameters: blastp, nr protein database, expect=20000, no filter, PAM30)

Other BLAST [web gateways](#)

#### All matches to this query

| Score | Mr(calc)  | Delta   | Sequence                      |
|-------|-----------|---------|-------------------------------|
| 58.8  | 1322.7307 | 0.0274  | <a href="#">QIPLSGPNSVVGR</a> |
| 12.1  | 1322.8034 | -0.0454 | <a href="#">QLPTNVKLALAR</a>  |
| 11.9  | 1322.7207 | 0.0373  | <a href="#">QLPAFLADHRR</a>   |
| 10.6  | 1322.6488 | 0.1092  | <a href="#">MNMHVPPWRR</a>    |
| 10.4  | 1322.6691 | 0.0889  | <a href="#">QLPQERPADGGR</a>  |
| 10.2  | 1322.7921 | -0.0341 | <a href="#">KLEELAPIAAR</a>   |
| 9.8   | 1322.8034 | -0.0454 | <a href="#">KLIALSQPALNR</a>  |
| 9.2   | 1322.7493 | 0.0088  | <a href="#">KLLPSHGTLMAR</a>  |
| 8.9   | 1322.6653 | 0.0928  | <a href="#">QLGEKGLEMER</a>   |
| 8.7   | 1322.6322 | 0.1258  | <a href="#">KINAMGMSQQL</a>   |

Mascot: <http://www.matrixscience.com/>

# MATRIX SCIENCE Mascot Search Results

## Peptide View **Spot no 13**

MS/MS Fragmentation of **HAGDLGNIVANAEGVAEATIVDK**

Found in **gi|42408425** in **NCBI nr**, putative superoxide dismutase [Cu-Zn], chloroplast precursor [Oryza sativa Japonica Group]

Match to Query 255: 2263.154124 from(2264.161400,1+) intensity(0.0000) index(30)

Title: Label: G6, Spot\_Id: 219760, Peak\_List\_Id: 225757, MSMS Job\_Run\_Id: 21788, Comment:

Data file C:\Documents and Settings\Administrator\Desktop\farah BHU\spot set plate\Farah-Garima 11May

2013\ppw\_G6\_136842238300.txt

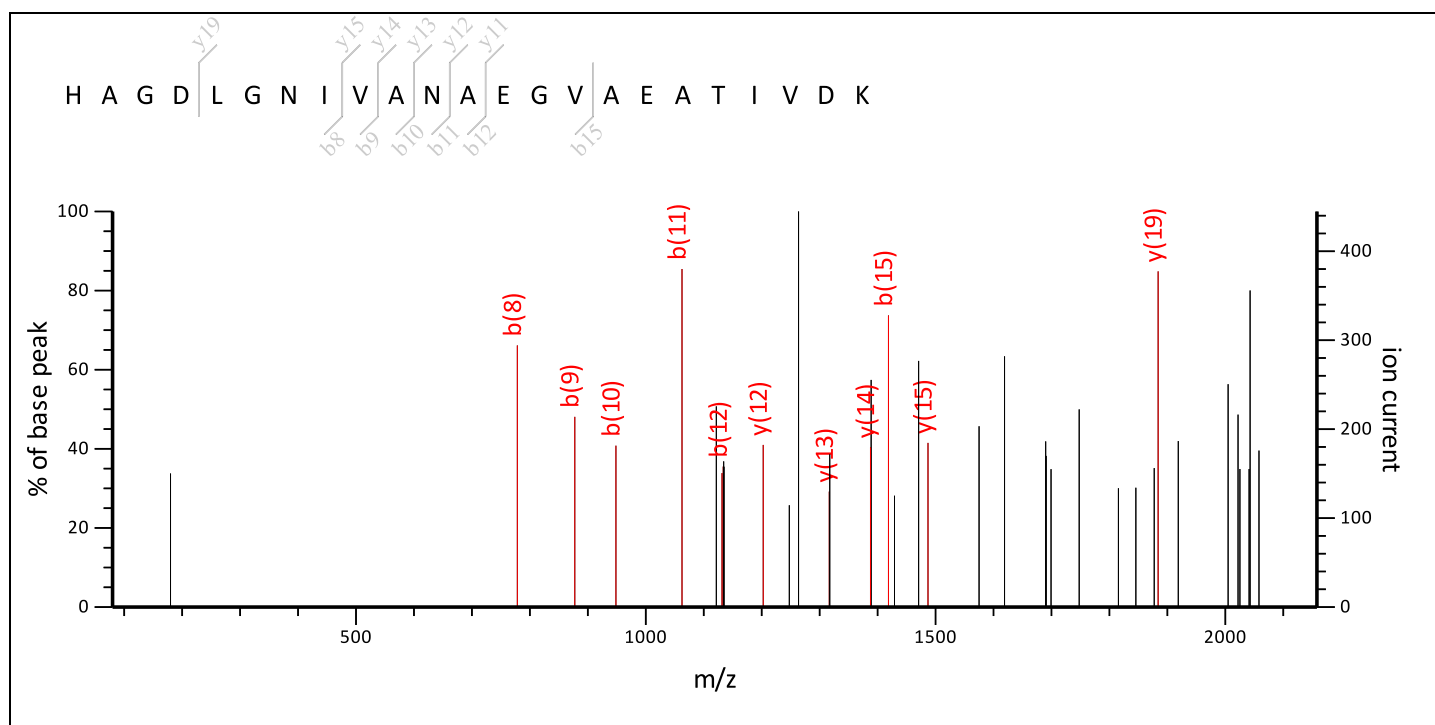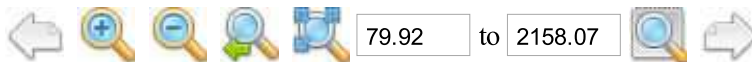

Label all possible matches  Label matches used for scoring

**Monoisotopic mass of neutral peptide Mr(calc):** 2263.1444

**Fixed modifications:** Carbamidomethyl (C) (apply to specified residues or termini only)

**Ions Score:** 17 **Expect:** 28

**Matches:** 12/120 fragment ions using 37 most intense peaks ([help](#))

| # | a        | a*       | b        | b*       | Seq. | y                | y*        | #  |
|---|----------|----------|----------|----------|------|------------------|-----------|----|
| 1 | 110.0713 |          | 138.0662 |          | H    |                  |           | 23 |
| 2 | 181.1084 |          | 209.1033 |          | A    | 2127.0928        | 2110.0663 | 22 |
| 3 | 238.1299 |          | 266.1248 |          | G    | 2056.0557        | 2039.0291 | 21 |
| 4 | 353.1568 |          | 381.1517 |          | D    | 1999.0342        | 1982.0077 | 20 |
| 5 | 466.2409 |          | 494.2358 |          | L    | <b>1884.0073</b> | 1866.9807 | 19 |
| 6 | 523.2623 |          | 551.2572 |          | G    | 1770.9232        | 1753.8967 | 18 |
| 7 | 637.3052 | 620.2787 | 665.3002 | 648.2736 | N    | 1713.9018        | 1696.8752 | 17 |

|    |           |           |                  |           |   |                  |           |    |
|----|-----------|-----------|------------------|-----------|---|------------------|-----------|----|
| 8  | 750.3893  | 733.3628  | <b>778.3842</b>  | 761.3577  | I | 1599.8588        | 1582.8323 | 16 |
| 9  | 849.4577  | 832.4312  | <b>877.4526</b>  | 860.4261  | V | <b>1486.7748</b> | 1469.7482 | 15 |
| 10 | 920.4948  | 903.4683  | <b>948.4898</b>  | 931.4632  | A | <b>1387.7064</b> | 1370.6798 | 14 |
| 11 | 1034.5378 | 1017.5112 | <b>1062.5327</b> | 1045.5061 | N | <b>1316.6692</b> | 1299.6427 | 13 |
| 12 | 1105.5749 | 1088.5483 | <b>1133.5698</b> | 1116.5432 | A | <b>1202.6263</b> | 1185.5998 | 12 |
| 13 | 1234.6175 | 1217.5909 | 1262.6124        | 1245.5858 | E | <b>1131.5892</b> | 1114.5626 | 11 |
| 14 | 1291.6389 | 1274.6124 | 1319.6339        | 1302.6073 | G | 1002.5466        | 985.5201  | 10 |
| 15 | 1390.7074 | 1373.6808 | <b>1418.7023</b> | 1401.6757 | V | 945.5251         | 928.4986  | 9  |
| 16 | 1461.7445 | 1444.7179 | 1489.7394        | 1472.7128 | A | 846.4567         | 829.4302  | 8  |
| 17 | 1590.7871 | 1573.7605 | 1618.7820        | 1601.7554 | E | 775.4196         | 758.3931  | 7  |
| 18 | 1661.8242 | 1644.7976 | 1689.8191        | 1672.7925 | A | 646.3770         | 629.3505  | 6  |
| 19 | 1762.8719 | 1745.8453 | 1790.8668        | 1773.8402 | T | 575.3399         | 558.3134  | 5  |
| 20 | 1875.9559 | 1858.9294 | 1903.9508        | 1886.9243 | I | 474.2922         | 457.2657  | 4  |
| 21 | 1975.0243 | 1957.9978 | 2003.0192        | 1985.9927 | V | 361.2082         | 344.1816  | 3  |
| 22 | 2090.0513 | 2073.0247 | 2118.0462        | 2101.0196 | D | 262.1397         | 245.1132  | 2  |
| 23 |           |           |                  |           | K | 147.1128         | 130.0863  | 1  |

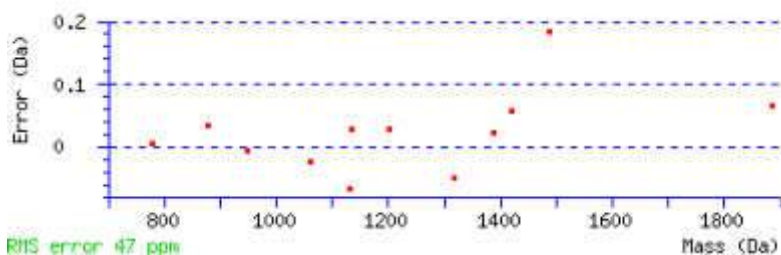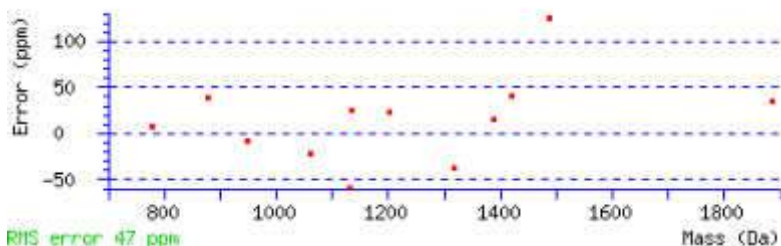

NCBI BLAST search of [HAGDLGNIVANAEGVAEATIVDK](#)

(Parameters: blastp, nr protein database, expect=20000, no filter, PAM30)

Other BLAST [web gateways](#)

#### All matches to this query

| Score | Mr(calc)  | Delta   | Sequence                                 |
|-------|-----------|---------|------------------------------------------|
| 16.8  | 2263.1444 | 0.0097  | <a href="#">HAGDLGNIVANAEGVAEATIVDK</a>  |
| 3.1   | 2263.1228 | 0.0313  | <a href="#">QMGLAENQLSIDMLELWLK</a>      |
| 1.4   | 2263.0869 | 0.0672  | <a href="#">FEQSGGWIRTLLEEAENER</a>      |
| 0.7   | 2263.1444 | 0.0097  | <a href="#">NQAEGSFITNNDKQSALVLK</a>     |
| 0.1   | 2263.1696 | -0.0155 | <a href="#">TFKSGVEGAGSGGAVLPSSVESIK</a> |

Mascot: <http://www.matrixscience.com/>

# MATRIX SCIENCE Mascot Search Results

## Peptide View **Spot no 13**

MS/MS Fragmentation of **GTSQVEGVVTLTQDDQGPTTVNVR**

Found in **gi|42408425** in **NCBI nr**, putative superoxide dismutase [Cu-Zn], chloroplast precursor [Oryza sativa Japonica Group]

Match to Query 257: 2500.258824 from(2501.266100,1+) intensity(0.0000) index(31)

Title: Label: G6, Spot\_Id: 219760, Peak\_List\_Id: 225741, MSMS Job\_Run\_Id: 21788, Comment:

Data file C:\Documents and Settings\Administrator\Desktop\farah BHU\spot set plate\Farah-Garima 11May

2013\ppw\_G6\_136842238300.txt

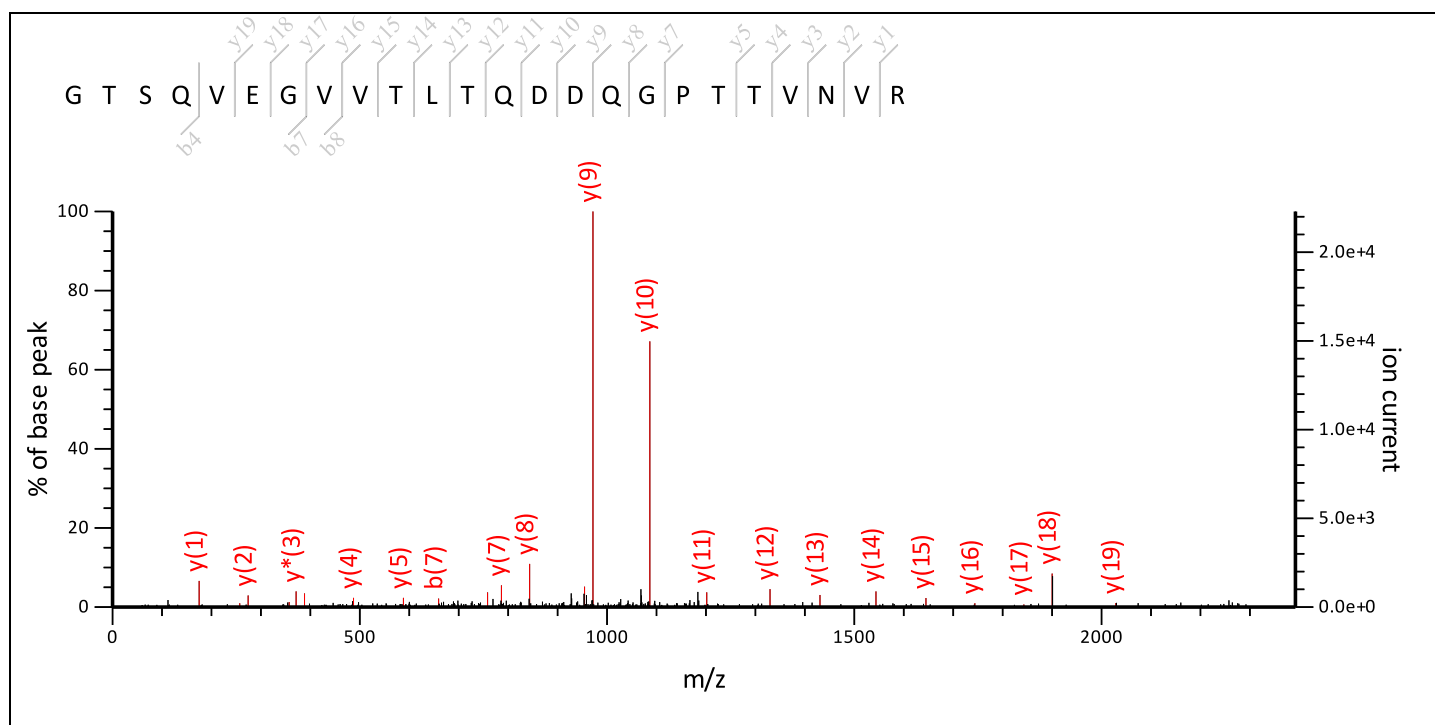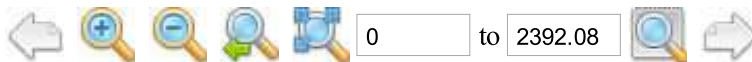

Label all possible matches  Label matches used for scoring

**Monoisotopic mass of neutral peptide Mr(calc):** 2500.2406

**Fixed modifications:** Carbamidomethyl (C) (apply to specified residues or termini only)

**Ions Score:** 129 **Expect:** 1.8e-10

**Matches:** 24/132 fragment ions using 46 most intense peaks ([help](#))

| # | a        | a*       | b        | b*       | Seq. | y         | y*        | #  |
|---|----------|----------|----------|----------|------|-----------|-----------|----|
| 1 | 30.0338  |          | 58.0287  |          | G    |           |           | 24 |
| 2 | 131.0815 |          | 159.0764 |          | T    | 2444.2263 | 2427.1998 | 23 |
| 3 | 218.1135 |          | 246.1084 |          | S    | 2343.1787 | 2326.1521 | 22 |
| 4 | 346.1721 | 329.1456 | 374.1670 | 357.1405 | Q    | 2256.1466 | 2239.1201 | 21 |
| 5 | 445.2405 | 428.2140 | 473.2354 | 456.2089 | V    | 2128.0881 | 2111.0615 | 20 |
| 6 | 574.2831 | 557.2566 | 602.2780 | 585.2515 | E    | 2029.0196 | 2011.9931 | 19 |
| 7 | 631.3046 | 614.2780 | 659.2995 | 642.2729 | G    | 1899.9770 | 1882.9505 | 18 |

|    |           |           |                 |           |   |                  |                 |    |
|----|-----------|-----------|-----------------|-----------|---|------------------|-----------------|----|
| 8  | 730.3730  | 713.3464  | <b>758.3679</b> | 741.3414  | V | <b>1842.9556</b> | 1825.9290       | 17 |
| 9  | 829.4414  | 812.4149  | 857.4363        | 840.4098  | V | <b>1743.8872</b> | 1726.8606       | 16 |
| 10 | 930.4891  | 913.4625  | 958.4840        | 941.4575  | T | <b>1644.8188</b> | 1627.7922       | 15 |
| 11 | 1043.5732 | 1026.5466 | 1071.5681       | 1054.5415 | L | <b>1543.7711</b> | 1526.7445       | 14 |
| 12 | 1144.6208 | 1127.5943 | 1172.6157       | 1155.5892 | T | <b>1430.6870</b> | 1413.6605       | 13 |
| 13 | 1272.6794 | 1255.6529 | 1300.6743       | 1283.6478 | Q | <b>1329.6393</b> | 1312.6128       | 12 |
| 14 | 1387.7064 | 1370.6798 | 1415.7013       | 1398.6747 | D | <b>1201.5808</b> | 1184.5542       | 11 |
| 15 | 1502.7333 | 1485.7067 | 1530.7282       | 1513.7017 | D | <b>1086.5538</b> | 1069.5273       | 10 |
| 16 | 1630.7919 | 1613.7653 | 1658.7868       | 1641.7602 | Q | <b>971.5269</b>  | <b>954.5003</b> | 9  |
| 17 | 1687.8133 | 1670.7868 | 1715.8083       | 1698.7817 | G | <b>843.4683</b>  | 826.4417        | 8  |
| 18 | 1784.8661 | 1767.8396 | 1812.8610       | 1795.8345 | P | <b>786.4468</b>  | 769.4203        | 7  |
| 19 | 1885.9138 | 1868.8872 | 1913.9087       | 1896.8821 | T | 689.3941         | 672.3675        | 6  |
| 20 | 1986.9615 | 1969.9349 | 2014.9564       | 1997.9298 | T | <b>588.3464</b>  | 571.3198        | 5  |
| 21 | 2086.0299 | 2069.0033 | 2114.0248       | 2096.9982 | V | <b>487.2987</b>  | 470.2722        | 4  |
| 22 | 2200.0728 | 2183.0463 | 2228.0677       | 2211.0412 | N | <b>388.2303</b>  | <b>371.2037</b> | 3  |
| 23 | 2299.1412 | 2282.1147 | 2327.1361       | 2310.1096 | V | <b>274.1874</b>  | <b>257.1608</b> | 2  |
| 24 |           |           |                 |           | R | <b>175.1190</b>  | 158.0924        | 1  |

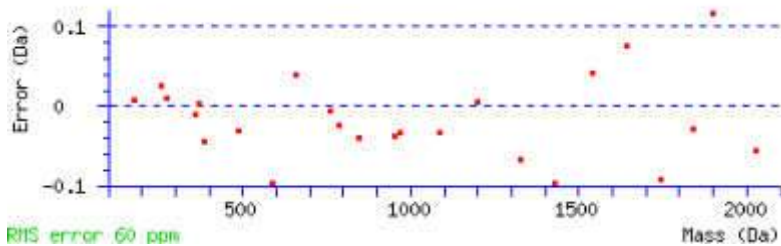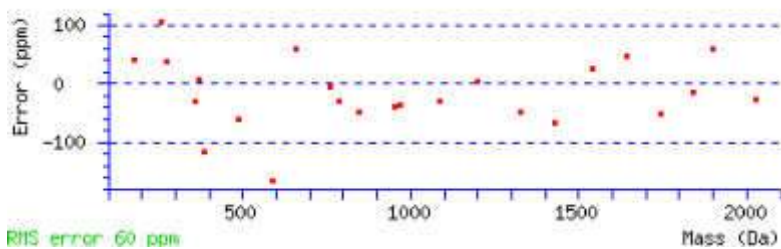

NCBI **BLAST** search of [GTSQVEGVVTLTQDDQGPTTVNVR](#)

(Parameters: blastp, nr protein database, expect=20000, no filter, PAM30)

Other BLAST [web gateways](#)

#### All matches to this query

| Score | Mr(calc)  | Delta   | Sequence                                   |
|-------|-----------|---------|--------------------------------------------|
| 129.3 | 2500.2406 | 0.0182  | <a href="#">GTSQVEGVVTLTQDDQGPTTVNVR</a>   |
| 16.6  | 2500.2406 | 0.0183  | <a href="#">GNSTVEGVVTLTQENEGPTTVNVR</a>   |
| 7.6   | 2500.2881 | -0.0293 | <a href="#">SVAVASSRLTSLEQQGAASTSTPPR</a>  |
| 6.0   | 2500.3537 | -0.0948 | <a href="#">EKTLEIQLLELYGLQEQGA AVR</a>    |
| 5.4   | 2500.1758 | 0.0830  | <a href="#">EDET EFS PFY GIDK GAVLQEAR</a> |
| 5.2   | 2500.1978 | 0.0610  | <a href="#">YLCVAADLDNESDVVMLLAER</a>      |

|     |           |         |                                         |
|-----|-----------|---------|-----------------------------------------|
| 5.1 | 2500.3108 | -0.0519 | <a href="#">EWWIGVGETLAEAASMLRTQALR</a> |
| 4.2 | 2500.2647 | -0.0058 | <a href="#">CLPGIISAYLKLNSYFPCAWK</a>   |
| 3.6 | 2500.3286 | -0.0697 | <a href="#">AVDENPPLQPVQIEKQVAGVDVR</a> |
| 3.4 | 2500.1039 | 0.1549  | <a href="#">VVPEFEGQLQDFGGSVMHACDYK</a> |

**Mascot:** <http://www.matrixscience.com/>



# Mascot Search Results

## Peptide View **Spot no 13**

MS/MS Fragmentation of **AFVVHELEDDLKGGHELSTGNAGGR**

Found in **gi|42408425** in **NCBI**nr, putative superoxide dismutase [Cu-Zn], chloroplast precursor [Oryza sativa Japonica Group]

Match to Query 259: 2864.417024 from(2865.424300,1+) intensity(0.0000) index(32)

Title: Label: G6, Spot\_Id: 219760, Peak\_List\_Id: 225744, MSMS Job\_Run\_Id: 21788, Comment:

Data file C:\Documents and Settings\Administrator\Desktop\farah BHU\spot set plate\Farah-Garima 11May

2013\ppw\_G6\_136842238300.txt

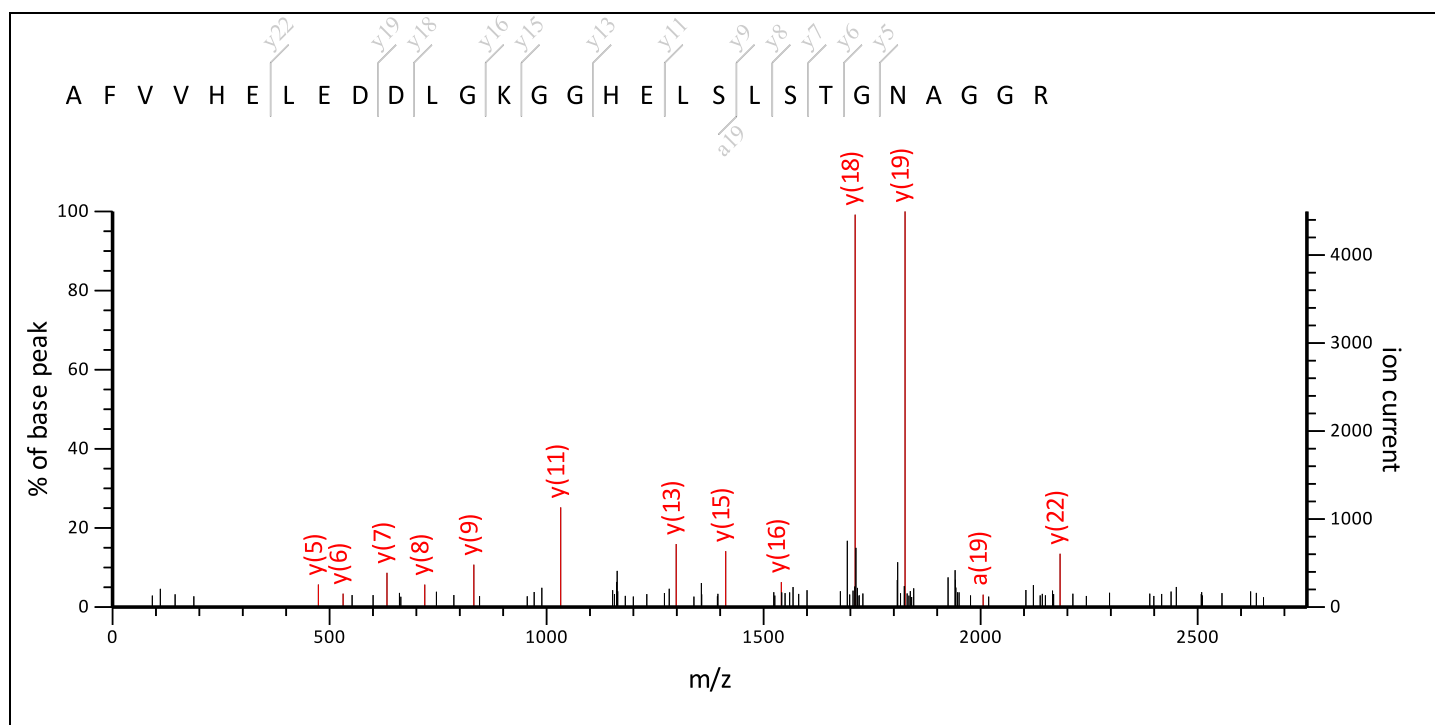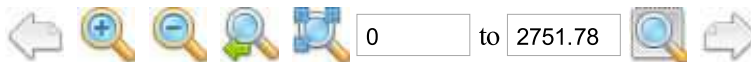

Label all possible matches  Label matches used for scoring

**Monoisotopic mass of neutral peptide Mr(calc):** 2864.4053

**Fixed modifications:** Carbamidomethyl (C) (apply to specified residues or termini only)

**Ions Score:** 70 **Expect:** 9.8e-05

**Matches :** 13/138 fragment ions using 24 most intense peaks ([help](#))

| # | a        | a* | b        | b* | Seq. | y                | y*        | #  |
|---|----------|----|----------|----|------|------------------|-----------|----|
| 1 | 44.0495  |    | 72.0444  |    | A    |                  |           | 28 |
| 2 | 191.1179 |    | 219.1128 |    | F    | 2794.3755        | 2777.3489 | 27 |
| 3 | 290.1863 |    | 318.1812 |    | V    | 2647.3070        | 2630.2805 | 26 |
| 4 | 389.2547 |    | 417.2496 |    | V    | 2548.2386        | 2531.2121 | 25 |
| 5 | 526.3136 |    | 554.3085 |    | H    | 2449.1702        | 2432.1437 | 24 |
| 6 | 655.3562 |    | 683.3511 |    | E    | 2312.1113        | 2295.0848 | 23 |
| 7 | 768.4403 |    | 796.4352 |    | L    | <b>2183.0687</b> | 2166.0422 | 22 |



|    |                  |           |           |           |   |                  |           |    |
|----|------------------|-----------|-----------|-----------|---|------------------|-----------|----|
| 8  | 897.4829         |           | 925.4778  |           | E | 2069.9847        | 2052.9581 | 21 |
| 9  | 1012.5098        |           | 1040.5047 |           | D | 1940.9421        | 1923.9155 | 20 |
| 10 | 1127.5368        |           | 1155.5317 |           | D | <b>1825.9151</b> | 1808.8886 | 19 |
| 11 | 1240.6208        |           | 1268.6157 |           | L | <b>1710.8882</b> | 1693.8616 | 18 |
| 12 | 1297.6423        |           | 1325.6372 |           | G | 1597.8041        | 1580.7776 | 17 |
| 13 | 1425.7373        | 1408.7107 | 1453.7322 | 1436.7056 | K | <b>1540.7826</b> | 1523.7561 | 16 |
| 14 | 1482.7587        | 1465.7322 | 1510.7536 | 1493.7271 | G | <b>1412.6877</b> | 1395.6611 | 15 |
| 15 | 1539.7802        | 1522.7536 | 1567.7751 | 1550.7486 | G | 1355.6662        | 1338.6397 | 14 |
| 16 | 1676.8391        | 1659.8125 | 1704.8340 | 1687.8075 | H | <b>1298.6448</b> | 1281.6182 | 13 |
| 17 | 1805.8817        | 1788.8551 | 1833.8766 | 1816.8501 | E | 1161.5858        | 1144.5593 | 12 |
| 18 | 1918.9658        | 1901.9392 | 1946.9607 | 1929.9341 | L | <b>1032.5432</b> | 1015.5167 | 11 |
| 19 | <b>2005.9978</b> | 1988.9712 | 2033.9927 | 2016.9661 | S | 919.4592         | 902.4326  | 10 |
| 20 | 2119.0818        | 2102.0553 | 2147.0768 | 2130.0502 | L | <b>832.4272</b>  | 815.4006  | 9  |
| 21 | 2206.1139        | 2189.0873 | 2234.1088 | 2217.0822 | S | <b>719.3431</b>  | 702.3165  | 8  |
| 22 | 2307.1616        | 2290.1350 | 2335.1565 | 2318.1299 | T | <b>632.3111</b>  | 615.2845  | 7  |
| 23 | 2364.1830        | 2347.1565 | 2392.1779 | 2375.1514 | G | <b>531.2634</b>  | 514.2368  | 6  |
| 24 | 2478.2259        | 2461.1994 | 2506.2209 | 2489.1943 | N | <b>474.2419</b>  | 457.2154  | 5  |
| 25 | 2549.2631        | 2532.2365 | 2577.2580 | 2560.2314 | A | 360.1990         | 343.1724  | 4  |
| 26 | 2606.2845        | 2589.2580 | 2634.2794 | 2617.2529 | G | 289.1619         | 272.1353  | 3  |
| 27 | 2663.3060        | 2646.2794 | 2691.3009 | 2674.2744 | G | 232.1404         | 215.1139  | 2  |
| 28 |                  |           |           |           | R | 175.1190         | 158.0924  | 1  |

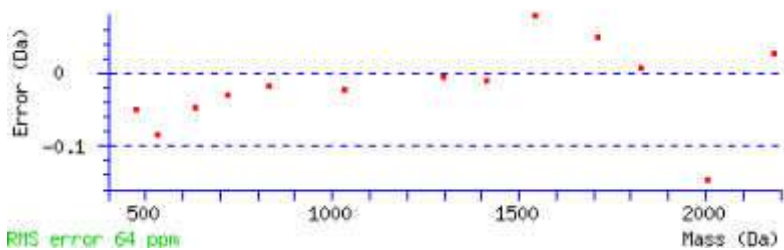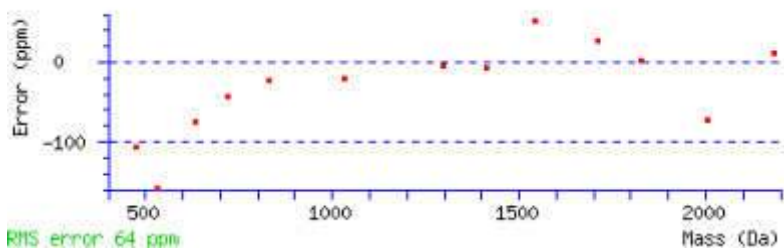

NCBI **BLAST** search of [AFVVHELEDDLKGGHELSTGNAGGR](#)  
 (Parameters: blastp, nr protein database, expect=20000, no filter, PAM30)  
 Other BLAST [web gateways](#)

#### All matches to this query

| Score | Mr(calc)  | Delta   | Sequence                                    |
|-------|-----------|---------|---------------------------------------------|
| 70.0  | 2864.4053 | 0.0117  | <a href="#">AFVVHELEDDLKGGHELSTGNAGGR</a>   |
| 9.1   | 2864.4879 | -0.0709 | <a href="#">ALESPAPIANQGVITQLSDQISTLNER</a> |

|     |           |         |                                               |
|-----|-----------|---------|-----------------------------------------------|
| 0.9 | 2864.3022 | 0.1148  | <a href="#">DDSDGGISLAPAGARTHMGHAHHHHK</a>    |
| 0.8 | 2864.4451 | -0.0281 | <a href="#">HTQGDGSAVAVLESMGSKGSVLVNGTHVK</a> |
| 0.3 | 2864.5398 | -0.1227 | <a href="#">KEKPPLADPDAVYLIPMEWVLTPVK</a>     |
| 0.2 | 2864.1973 | 0.2198  | <a href="#">EVESGMMEDDPINFQAMKSSNSMK</a>      |

**Mascot:** <http://www.matrixscience.com/>

# MATRIX SCIENCE Mascot Search Results

## Peptide View **Spot no 13**

MS/MS Fragmentation of **AVAVLKGT SQVEGVVTLTQDDQGPTTVNVR**

Found in **gi|42408425** in **NCBI nr**, putative superoxide dismutase [Cu-Zn], chloroplast precursor [Oryza sativa Japonica Group]

Match to Query 261: 3081.629924 from(3082.637200,1+) intensity(0.0000) index(33)

Title: Label: G6, Spot\_Id: 219760, Peak\_List\_Id: 225743, MSMS Job\_Run\_Id: 21788, Comment:

Data file C:\Documents and Settings\Administrator\Desktop\farah BHU\spot set plate\Farah-Garima 11May

2013\ppw\_G6\_136842238300.txt

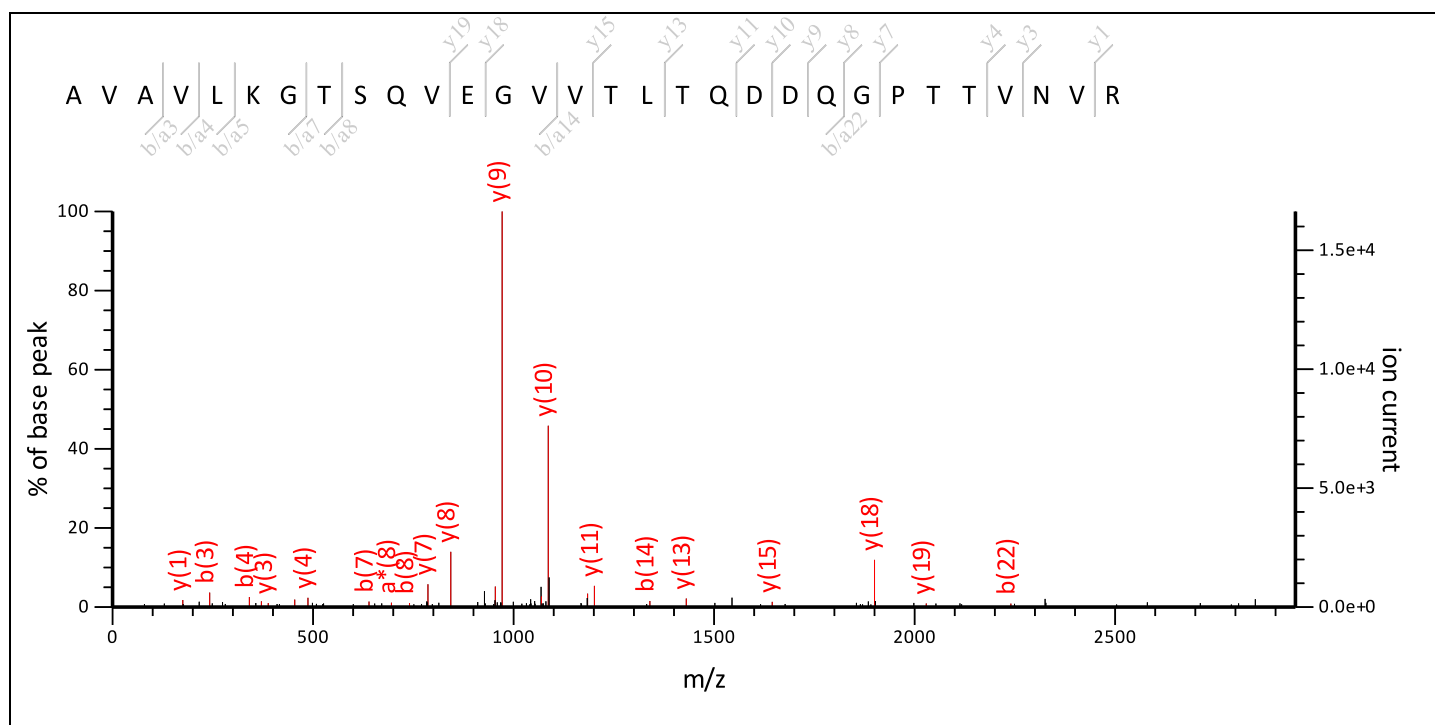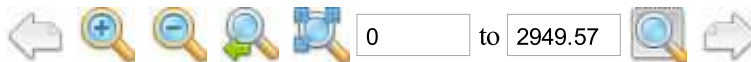

Label all possible matches  Label matches used for scoring

**Monoisotopic mass of neutral peptide Mr(calc):** 3081.6307

**Fixed modifications:** Carbamidomethyl (C) (apply to specified residues or termini only)

**Ions Score:** 66 **Expect:** 0.0002

**Matches :** 24/164 fragment ions using 48 most intense peaks ([help](#))

| # | a        | a*       | b               | b*       | Seq. | y         | y*        | #  |
|---|----------|----------|-----------------|----------|------|-----------|-----------|----|
| 1 | 44.0495  |          | 72.0444         |          | A    |           |           | 30 |
| 2 | 143.1179 |          | 171.1128        |          | V    | 3011.6008 | 2994.5742 | 29 |
| 3 | 214.1550 |          | <b>242.1499</b> |          | A    | 2912.5324 | 2895.5058 | 28 |
| 4 | 313.2234 |          | <b>341.2183</b> |          | V    | 2841.4952 | 2824.4687 | 27 |
| 5 | 426.3075 |          | <b>454.3024</b> |          | L    | 2742.4268 | 2725.4003 | 26 |
| 6 | 554.4024 | 537.3759 | 582.3974        | 565.3708 | K    | 2629.3428 | 2612.3162 | 25 |
| 7 | 611.4239 | 594.3974 | <b>639.4188</b> | 622.3923 | G    | 2501.2478 | 2484.2213 | 24 |

|    |           |           |           |           |   |           |           |    |
|----|-----------|-----------|-----------|-----------|---|-----------|-----------|----|
| 8  | 712.4716  | 695.4450  | 740.4665  | 723.4400  | T | 2444.2263 | 2427.1998 | 23 |
| 9  | 799.5036  | 782.4771  | 827.4985  | 810.4720  | S | 2343.1787 | 2326.1521 | 22 |
| 10 | 927.5622  | 910.5356  | 955.5571  | 938.5306  | Q | 2256.1466 | 2239.1201 | 21 |
| 11 | 1026.6306 | 1009.6041 | 1054.6255 | 1037.5990 | V | 2128.0881 | 2111.0615 | 20 |
| 12 | 1155.6732 | 1138.6467 | 1183.6681 | 1166.6416 | E | 2029.0196 | 2011.9931 | 19 |
| 13 | 1212.6947 | 1195.6681 | 1240.6896 | 1223.6630 | G | 1899.9770 | 1882.9505 | 18 |
| 14 | 1311.7631 | 1294.7365 | 1339.7580 | 1322.7314 | V | 1842.9556 | 1825.9290 | 17 |
| 15 | 1410.8315 | 1393.8049 | 1438.8264 | 1421.7999 | V | 1743.8872 | 1726.8606 | 16 |
| 16 | 1511.8792 | 1494.8526 | 1539.8741 | 1522.8475 | T | 1644.8188 | 1627.7922 | 15 |
| 17 | 1624.9632 | 1607.9367 | 1652.9582 | 1635.9316 | L | 1543.7711 | 1526.7445 | 14 |
| 18 | 1726.0109 | 1708.9844 | 1754.0058 | 1736.9793 | T | 1430.6870 | 1413.6605 | 13 |
| 19 | 1854.0695 | 1837.0429 | 1882.0644 | 1865.0379 | Q | 1329.6393 | 1312.6128 | 12 |
| 20 | 1969.0964 | 1952.0699 | 1997.0914 | 1980.0648 | D | 1201.5808 | 1184.5542 | 11 |
| 21 | 2084.1234 | 2067.0968 | 2112.1183 | 2095.0917 | D | 1086.5538 | 1069.5273 | 10 |
| 22 | 2212.1820 | 2195.1554 | 2240.1769 | 2223.1503 | Q | 971.5269  | 954.5003  | 9  |
| 23 | 2269.2034 | 2252.1769 | 2297.1983 | 2280.1718 | G | 843.4683  | 826.4417  | 8  |
| 24 | 2366.2562 | 2349.2296 | 2394.2511 | 2377.2245 | P | 786.4468  | 769.4203  | 7  |
| 25 | 2467.3039 | 2450.2773 | 2495.2988 | 2478.2722 | T | 689.3941  | 672.3675  | 6  |
| 26 | 2568.3515 | 2551.3250 | 2596.3465 | 2579.3199 | T | 588.3464  | 571.3198  | 5  |
| 27 | 2667.4200 | 2650.3934 | 2695.4149 | 2678.3883 | V | 487.2987  | 470.2722  | 4  |
| 28 | 2781.4629 | 2764.4363 | 2809.4578 | 2792.4312 | N | 388.2303  | 371.2037  | 3  |
| 29 | 2880.5313 | 2863.5047 | 2908.5262 | 2891.4997 | V | 274.1874  | 257.1608  | 2  |
| 30 |           |           |           |           | R | 175.1190  | 158.0924  | 1  |

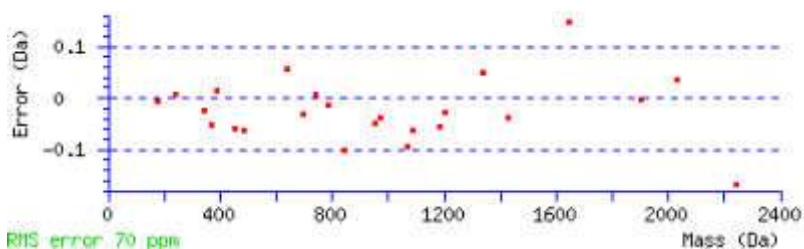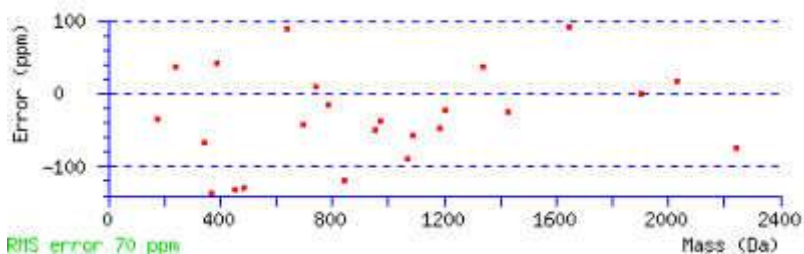

NCBI **BLAST** search of [AVAVLKGTSQVEGVVTLTQDDQGPTTVNVR](#)

(Parameters: blastp, nr protein database, expect=20000, no filter, PAM30)

Other BLAST [web gateways](#)

#### All matches to this query

| Score | Mr(calc) | Delta | Sequence |
|-------|----------|-------|----------|
|       |          |       |          |

|      |           |         |                                                 |
|------|-----------|---------|-------------------------------------------------|
| 66.2 | 3081.6307 | -0.0007 | <a href="#">AVAVLKGT SQVEGVVTLTQDDQGPTTVNVR</a> |
| 12.9 | 3081.6306 | -0.0007 | <a href="#">AVAVLKGNSTVEGVVTLTQENEGPTTVNVR</a>  |
| 10.7 | 3081.4834 | 0.1465  | <a href="#">QAAADALMHYSQFAMVCISQGVSPSKLR</a>    |
| 6.7  | 3081.5403 | 0.0897  | <a href="#">LVKLGSPMETVYIAEQATPMVVEWGSK</a>     |
| 5.4  | 3081.4834 | 0.1465  | <a href="#">QAAADALMHYSQFAMVCISQGVSPSKLR</a>    |
| 4.6  | 3081.3855 | 0.2444  | <a href="#">MEFSMVDHPPCARHLGDDVAIAEAGQGR</a>    |
| 4.6  | 3081.3855 | 0.2444  | <a href="#">MEFSMVDHPPCARHLGDDVAIAEAGQGR</a>    |
| 4.5  | 3081.4615 | 0.1685  | <a href="#">GSFETIHVQDSTGHEFATRMGNVFTIGK</a>    |
| 4.3  | 3081.3891 | 0.2409  | <a href="#">RMPFGLCNAPATFQECMLSIFSDMVK</a>      |
| 3.5  | 3081.4727 | 0.1572  | <a href="#">IRVSDGDGNGETTAGQGGVVGVEFFAGCWLR</a> |

**Mascot:** <http://www.matrixscience.com/>

**MATRIX SCIENCE Mascot Search Results**

**Peptide View Spot no 41**

MS/MS Fragmentation of **IEDLSSQLQAQAQQFR**

Found in **gi56784713** in **NCBIInr**, alpha NAC-like protein [Oryza sativa Japonica Group]

Match to Query 41: 1932.133724 from(1933.141000,1+) intensity(0.0000) index(14)  
 Title: Label: L6, Spot\_Id: 228933, Peak\_List\_Id: 257650, MSMS Job\_Run\_Id: 24929, Comment:  
 Data file ppw\_L6\_138985137000.txt

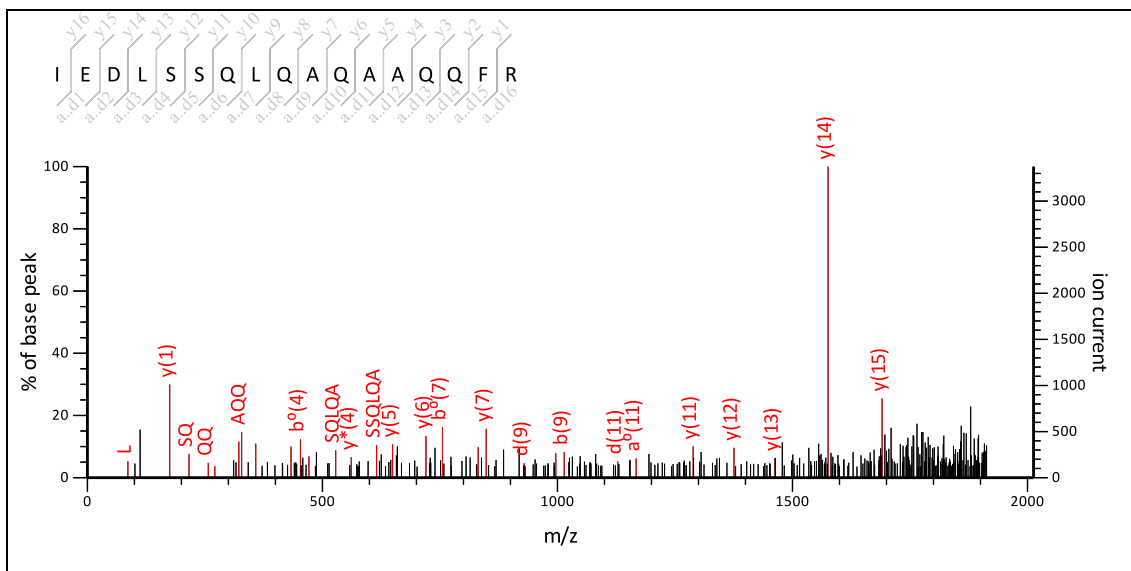

Navigation icons: ? (help), image (download), left arrow, zoom in, zoom out, right arrow, input field (0 to 2012.89), zoom in, right arrow.

Label all possible matches  Label matches used for scoring

Monoisotopic mass of neutral peptide Mr(calc): 1931.9701  
 Fixed modifications: Carbamidomethyl (C) (apply to specified residues or termini only)  
 Ions Score: 47 Expect: 0.025  
 Matches : 37/300 fragment ions using 57 most intense peaks ([help](#))

| #  | Immon.   | a         | a*        | a <sup>0</sup>   | b                | b*        | b <sup>0</sup>  | d                | Seq. | v         | w         | y                | y*              | y <sup>0</sup> | #  |
|----|----------|-----------|-----------|------------------|------------------|-----------|-----------------|------------------|------|-----------|-----------|------------------|-----------------|----------------|----|
| 1  | 86.0964  | 86.0964   |           |                  | 114.0913         |           |                 | 44.0495          | I    |           |           |                  |                 |                | 17 |
| 2  | 102.0550 | 215.1390  |           | 197.1285         | 243.1339         |           | 225.1234        | 157.1335         | E    | 1745.8565 | 1744.8613 | 1819.8933        | 1802.8668       | 1801.8828      | 16 |
| 3  | 88.0393  | 330.1660  |           | 312.1554         | <b>358.1609</b>  |           | 340.1503        | 286.1761         | D    | 1630.8296 | 1629.8343 | <b>1690.8507</b> | 1673.8242       | 1672.8402      | 15 |
| 4  | 86.0964  | 443.2500  |           | 425.2395         | <b>471.2449</b>  |           | <b>453.2344</b> | 401.2031         | L    | 1517.7455 | 1516.7503 | <b>1575.8238</b> | 1558.7972       | 1557.8132      | 14 |
| 5  | 60.0444  | 530.2821  |           | 512.2715         | 558.2770         |           | 540.2664        | 514.2871         | S    | 1430.7135 | 1429.7183 | <b>1462.7397</b> | 1445.7132       | 1444.7292      | 13 |
| 6  | 60.0444  | 617.3141  |           | 599.3035         | 645.3090         |           | 627.2984        | 601.3192         | S    | 1343.6815 | 1342.6862 | <b>1375.7077</b> | 1358.6811       | 1357.6971      | 12 |
| 7  | 101.0709 | 745.3727  | 728.3461  | 727.3621         | 773.3676         | 756.3410  | <b>755.3570</b> | 688.3512         | Q    | 1215.6229 | 1214.6276 | <b>1288.6757</b> | 1271.6491       |                | 11 |
| 8  | 86.0964  | 858.4567  | 841.4302  | 840.4462         | 886.4516         | 869.4251  | 868.4411        | 816.4098         | L    | 1102.5388 | 1101.5436 | 1160.6171        | 1143.5905       |                | 10 |
| 9  | 101.0709 | 986.5153  | 969.4888  | 968.5047         | <b>1014.5102</b> | 997.4837  | <b>996.4997</b> | <b>929.4938</b>  | Q    | 974.4803  | 973.4850  | 1047.5330        | 1030.5065       |                | 9  |
| 10 | 44.0495  | 1057.5524 | 1040.5259 | 1039.5419        | 1085.5473        | 1068.5208 | 1067.5368       |                  | A    | 903.4431  |           | 919.4744         | 902.4479        |                | 8  |
| 11 | 101.0709 | 1185.6110 | 1168.5844 | <b>1167.6004</b> | 1213.6059        | 1196.5794 | 1195.5953       | <b>1128.5895</b> | Q    | 775.3846  | 774.3893  | <b>848.4373</b>  | <b>831.4108</b> |                | 7  |
| 12 | 44.0495  | 1256.6481 | 1239.6216 | 1238.6375        | 1284.6430        | 1267.6165 | 1266.6325       |                  | A    | 704.3475  |           | <b>720.3788</b>  | 703.3522        |                | 6  |
| 13 | 44.0495  | 1327.6852 | 1310.6587 | 1309.6747        | 1355.6801        | 1338.6536 | 1337.6696       |                  | A    | 633.3103  |           | <b>649.3416</b>  | 632.3151        |                | 5  |
| 14 | 101.0709 | 1455.7438 | 1438.7173 | 1437.7332        | 1483.7387        | 1466.7122 | 1465.7281       | 1398.7223        | Q    | 505.2518  | 504.2565  | 578.3045         | <b>561.2780</b> |                | 4  |
| 15 | 101.0709 | 1583.8024 | 1566.7758 | 1565.7918        | 1611.7973        | 1594.7707 | 1593.7867       | 1526.7809        | Q    | 377.1932  | 376.1979  | 450.2459         | <b>433.2194</b> |                | 3  |
| 16 | 120.0808 | 1730.8708 | 1713.8442 | 1712.8602        | 1758.8657        | 1741.8392 | 1740.8551       |                  | F    | 230.1248  |           | <b>322.1874</b>  | 305.1608        |                | 2  |
| 17 | 129.1135 |           |           |                  |                  |           |                 |                  | R    | 74.0237   | 73.0284   | <b>175.1190</b>  | 158.0924        |                | 1  |

|     |    |    |     |    |    |     |    |    |
|-----|----|----|-----|----|----|-----|----|----|
| Seq | ya | yb | Seq | ya | yb | Seq | ya | yb |
|-----|----|----|-----|----|----|-----|----|----|

|               |          |                 |                |          |                 |               |          |                 |
|---------------|----------|-----------------|----------------|----------|-----------------|---------------|----------|-----------------|
| <b>ED</b>     | 217.0819 | 245.0768        | <b>EDL</b>     | 330.1660 | <b>358.1609</b> | <b>EDLS</b>   | 417.1980 | 445.1929        |
| <b>EDLSS</b>  | 504.2300 | 532.2249        | <b>EDLSSQ</b>  | 632.2886 | 660.2835        | <b>DL</b>     | 201.1234 | 229.1183        |
| <b>DLS</b>    | 288.1554 | 316.1503        | <b>DLSS</b>    | 375.1874 | 403.1823        | <b>DLSSQ</b>  | 503.2460 | 531.2409        |
| <b>DLSSQL</b> | 616.3301 | 644.3250        | <b>LS</b>      | 173.1285 | 201.1234        | <b>LSS</b>    | 260.1605 | 288.1554        |
| <b>LSSQ</b>   | 388.2191 | 416.2140        | <b>LSSQL</b>   | 501.3031 | 529.2980        | <b>LSSQLQ</b> | 629.3617 | 657.3566        |
| <b>SS</b>     | 147.0764 | <b>175.0713</b> | <b>SSQ</b>     | 275.1350 | 303.1299        | <b>SSQL</b>   | 388.2191 | 416.2140        |
| <b>SSQLQ</b>  | 516.2776 | 544.2726        | <b>SSQLQA</b>  | 587.3148 | <b>615.3097</b> | <b>SQ</b>     | 188.1030 | <b>216.0979</b> |
| <b>SQL</b>    | 301.1870 | 329.1819        | <b>SQLQ</b>    | 429.2456 | 457.2405        | <b>SQLQA</b>  | 500.2827 | <b>528.2776</b> |
| <b>SQLQAQ</b> | 628.3413 | 656.3362        | <b>SQLQAQA</b> | 699.3784 | 727.3733        | <b>QL</b>     | 214.1550 | 242.1499        |
| <b>QLQ</b>    | 342.2136 | 370.2085        | <b>QLQA</b>    | 413.2507 | 441.2456        | <b>QLQAQ</b>  | 541.3093 | 569.3042        |
| <b>QLQAQA</b> | 612.3464 | 640.3413        | <b>QLQAQAA</b> | 683.3835 | 711.3784        | <b>LQ</b>     | 214.1550 | 242.1499        |
| <b>LQA</b>    | 285.1921 | 313.1870        | <b>LQAQ</b>    | 413.2507 | 441.2456        | <b>LQAQA</b>  | 484.2878 | 512.2827        |
| <b>LQAQAA</b> | 555.3249 | 583.3198        | <b>LQAQAAQ</b> | 683.3835 | 711.3784        | <b>QA</b>     | 172.1081 | 200.1030        |
| <b>QAQ</b>    | 300.1666 | <b>328.1615</b> | <b>QAQA</b>    | 371.2037 | 399.1987        | <b>QAQAA</b>  | 442.2409 | 470.2358        |
| <b>QAQAAQ</b> | 570.2994 | 598.2944        | <b>QAQAAQQ</b> | 698.3580 | 726.3529        | <b>AQ</b>     | 172.1081 | 200.1030        |
| <b>AQA</b>    | 243.1452 | <b>271.1401</b> | <b>AQAA</b>    | 314.1823 | 342.1772        | <b>AQAAQ</b>  | 442.2409 | 470.2358        |
| <b>AQAAQQ</b> | 570.2994 | 598.2944        | <b>QA</b>      | 172.1081 | 200.1030        | <b>QAA</b>    | 243.1452 | <b>271.1401</b> |
| <b>QAAQ</b>   | 371.2037 | 399.1987        | <b>QAAQQ</b>   | 499.2623 | 527.2572        | <b>QAAQQF</b> | 646.3307 | 674.3257        |
| <b>AA</b>     | 115.0866 | 143.0815        | <b>AAQ</b>     | 243.1452 | <b>271.1401</b> | <b>AAQQ</b>   | 371.2037 | 399.1987        |
| <b>AAQQF</b>  | 518.2722 | 546.2671        | <b>AQ</b>      | 172.1081 | 200.1030        | <b>AQQ</b>    | 300.1666 | <b>328.1615</b> |
| <b>AQQF</b>   | 447.2350 | 475.2300        | <b>QQ</b>      | 229.1295 | <b>257.1244</b> | <b>QQF</b>    | 376.1979 | 404.1928        |
| <b>QF</b>     | 248.1394 | 276.1343        |                |          |                 |               |          |                 |

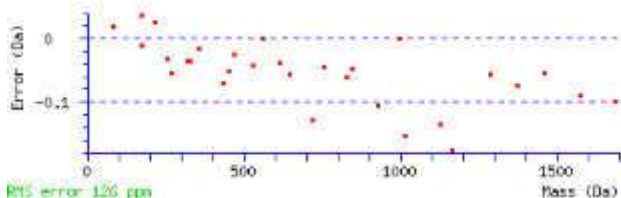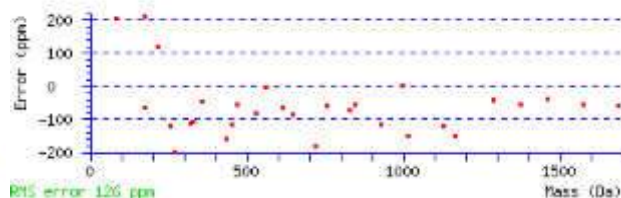

NCBI BLAST search of [IEDLSSOLOAQAAQOFR](#)  
 (Parameters: blastp, nr protein database, expect=20000, no filter, PAM30)  
 Other BLAST [web gateways](#)

All matches to this query

| Score | Mr(calc)  | Delta  | Sequence                            |
|-------|-----------|--------|-------------------------------------|
| 46.8  | 1931.9701 | 0.1636 | <a href="#">IEDLSSOLOAQAAQOFR</a>   |
| 7.1   | 1932.0065 | 0.1273 | <a href="#">GQGDAQOEELFLLRTR</a>    |
| 3.8   | 1932.0330 | 0.1008 | <a href="#">QSALAHFTQTKPLHTPR</a>   |
| 3.3   | 1931.9775 | 0.1562 | <a href="#">LFPLGNLDGASITMGSSPR</a> |
| 2.6   | 1931.9424 | 0.1913 | <a href="#">HRLSIYNHMSDFIQR</a>     |
| 2.2   | 1932.0204 | 0.1133 | <a href="#">GDNGSVFVLIKEGSSLLTP</a> |
| 1.6   | 1932.0350 | 0.0988 | <a href="#">OKTLVSLNSAESNALVMK</a>  |
| 1.5   | 1931.9734 | 0.1603 | <a href="#">LSMLQRNAEEQEIISR</a>    |
| 1.1   | 1931.9775 | 0.1562 | <a href="#">ELTQVVTMDTAAQAWR</a>    |
| 1.0   | 1931.9926 | 0.1412 | <a href="#">EVKNGHPRPSODGGLSVR</a>  |

Mascot: <http://www.matrixscience.com/>



**MATRIX SCIENCE Mascot Search Results**

**Peptide View Spot no 42**

MS/MS Fragmentation of **TFQGPPIQVER**

Found in **gi2961307** in **NCBI nr**, ribulose-1,5-bisphosphate carboxylase [Rondeletia odorata]

Match to Query 83: 1464.871524 from(1465.878800,1+) intensity(0.0000) index(16)  
 Title: Label: N6, Spot\_Id: 228935, Peak\_List\_Id: 257665, MSMS Job\_Run\_Id: 24931, Comment:  
 Data file ppw\_N6\_138985138100.txt

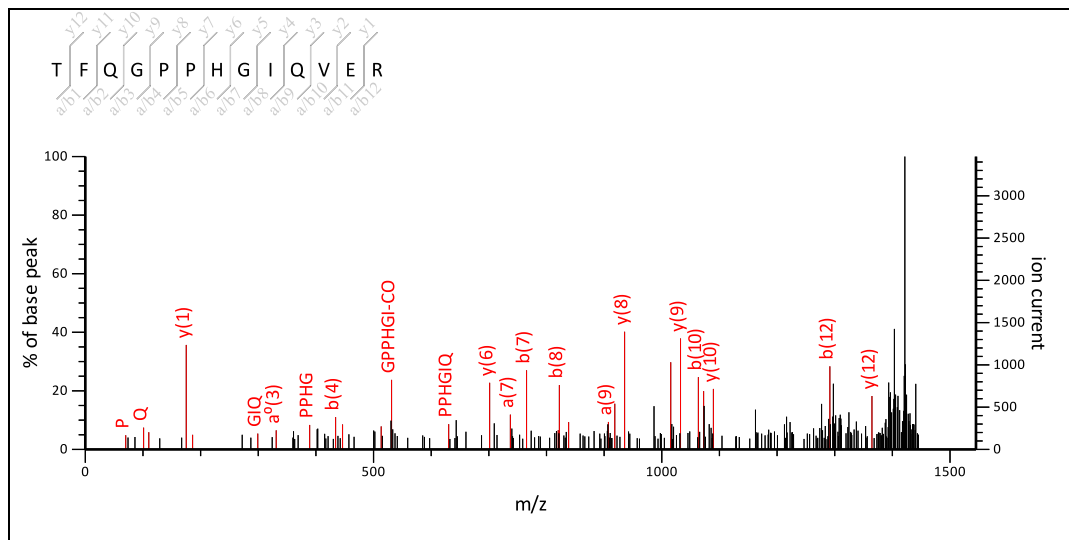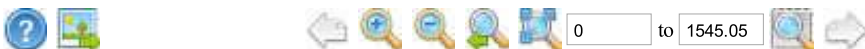

Label all possible matches  Label matches used for scoring

Monoisotopic mass of neutral peptide Mr(calc): 1464.7474  
 Fixed modifications: Carbamidomethyl (C) (apply to specified residues or termini only)  
 Ions Score: 60 Expect: 0.0031  
 Matches : 40/229 fragment ions using 41 most intense peaks ([help](#))

| #  | Immon.   | a         | a*        | a <sup>0</sup> | b         | b*        | b <sup>0</sup> | d         | d'       | Seq. | v         | w         | w'       | y         | y*             |
|----|----------|-----------|-----------|----------------|-----------|-----------|----------------|-----------|----------|------|-----------|-----------|----------|-----------|----------------|
| 1  | 74.0600  | 74.0600   |           | 56.0495        | 102.0550  |           | 84.0444        | 44.0495   |          | T    |           |           |          |           |                |
| 2  | 120.0808 | 221.1285  |           | 203.1179       | 249.1234  |           | 231.1128       |           |          | F    | 1272.6444 |           |          | 1364.7070 | 1347.6804 1346 |
| 3  | 101.0709 | 349.1870  | 332.1605  | 331.1765       | 377.1819  | 360.1554  | 359.1714       | 292.1656  |          | Q    | 1144.5858 | 1143.5905 |          | 1217.6385 | 1200.6120 1199 |
| 4  | 30.0338  | 406.2085  | 389.1819  | 388.1979       | 434.2034  | 417.1769  | 416.1928       |           |          | G    |           |           |          | 1089.5800 | 1072.5534 1071 |
| 5  | 70.0651  | 503.2613  | 486.2347  | 485.2507       | 531.2562  | 514.2296  | 513.2456       | 477.2456  |          | P    | 990.5116  | 989.5163  |          | 1032.5585 | 1015.5320 1014 |
| 6  | 70.0651  | 600.3140  | 583.2875  | 582.3035       | 628.3089  | 611.2824  | 610.2984       | 574.2984  |          | P    | 893.4588  | 892.4635  |          | 935.5057  | 918.4792 917   |
| 7  | 110.0713 | 737.3729  | 720.3464  | 719.3624       | 765.3679  | 748.3413  | 747.3573       |           |          | H    | 756.3999  |           |          | 838.4530  | 821.4264 820   |
| 8  | 30.0338  | 794.3944  | 777.3679  | 776.3838       | 822.3893  | 805.3628  | 804.3787       |           |          | G    |           |           |          | 701.3941  | 684.3675 683   |
| 9  | 86.0964  | 907.4785  | 890.4519  | 889.4679       | 935.4734  | 918.4468  | 917.4628       | 879.4472  | 893.4628 | I    | 586.2944  | 599.3148  | 613.3304 | 644.3726  | 627.3461 626   |
| 10 | 101.0709 | 1035.5370 | 1018.5105 | 1017.5265      | 1063.5320 | 1046.5054 | 1045.5214      | 978.5156  |          | Q    | 458.2358  | 457.2405  |          | 531.2885  | 514.2620 513   |
| 11 | 72.0808  | 1134.6055 | 1117.5789 | 1116.5949      | 1162.6004 | 1145.5738 | 1144.5898      | 1120.5898 |          | V    | 359.1674  | 372.1878  |          | 403.2300  | 386.2034 385   |
| 12 | 102.0550 | 1263.6480 | 1246.6215 | 1245.6375      | 1291.6430 | 1274.6164 | 1273.6324      | 1205.6426 |          | E    | 230.1248  | 229.1295  |          | 304.1615  | 287.1350 286   |
| 13 | 129.1135 |           |           |                |           |           |                |           |          | R    | 74.0237   | 73.0284   |          | 175.1190  | 158.0924 157   |

| Seq   | ya       | yb       | Seq    | ya       | yb       | Seq     | ya       | yb       |
|-------|----------|----------|--------|----------|----------|---------|----------|----------|
| FQ    | 248.1394 | 276.1343 | FQG    | 305.1608 | 333.1557 | FQGP    | 402.2136 | 430.2085 |
| FQPPP | 499.2663 | 527.2613 | FQPPH  | 636.3253 | 664.3202 | FQPPHG  | 693.3467 | 721.3416 |
| QG    | 158.0924 | 186.0873 | QGP    | 255.1452 | 283.1401 | QGPP    | 352.1979 | 380.1928 |
| QPPH  | 489.2568 | 517.2518 | QPPHG  | 546.2783 | 574.2732 | QPPHGI  | 659.3624 | 687.3573 |
| GP    | 127.0866 | 155.0815 | GPP    | 224.1394 | 252.1343 | GPPH    | 361.1983 | 389.1932 |
| GPPHG | 418.2197 | 446.2146 | GPPHGI | 531.3038 | 559.2987 | GPPHGIQ | 659.3624 | 687.3573 |
| PP    | 167.1179 | 195.1128 | PPH    | 304.1768 | 332.1717 | PPHG    | 361.1983 | 389.1932 |

|        |          |          |        |          |          |        |          |          |
|--------|----------|----------|--------|----------|----------|--------|----------|----------|
| PPHGI  | 474.2823 | 502.2772 | PPHGIQ | 602.3409 | 630.3358 | PH     | 207.1240 | 235.1190 |
| PHG    | 264.1455 | 292.1404 | PHGI   | 377.2296 | 405.2245 | PHGIQ  | 505.2881 | 533.2831 |
| PHGIQV | 604.3566 | 632.3515 | HG     | 167.0927 | 195.0877 | HGI    | 280.1768 | 308.1717 |
| HGIQ   | 408.2354 | 436.2303 | HGIQV  | 507.3038 | 535.2987 | HGIQVE | 636.3464 | 664.3413 |
| GI     | 143.1179 | 171.1128 | GIQ    | 271.1765 | 299.1714 | GIQV   | 370.2449 | 398.2398 |
| GIQVE  | 499.2875 | 527.2824 | IQ     | 214.1550 | 242.1499 | IQV    | 313.2234 | 341.2183 |
| IQVE   | 442.2660 | 470.2609 | QV     | 200.1394 | 228.1343 | QVE    | 329.1819 | 357.1769 |
| VE     | 201.1234 | 229.1183 |        |          |          |        |          |          |

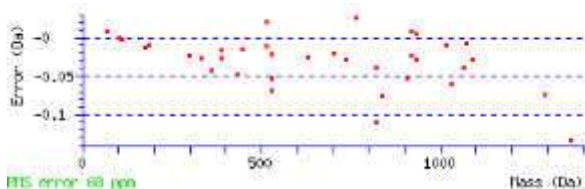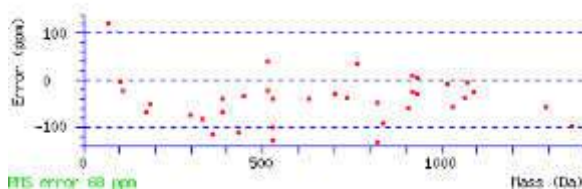

NCBI BLAST search of [TFQGPPHGIQVER](#)

(Parameters: blastp, nr protein database, expect=20000, no filter, PAM30)

Other BLAST [web gateways](#)

#### All matches to this query

| Score | Mr(calcd) | Delta  | Sequence                      |
|-------|-----------|--------|-------------------------------|
| 60.9  | 1464.7474 | 0.1241 | <a href="#">TFQGPPHGLQVER</a> |
| 60.9  | 1464.7474 | 0.1241 | <a href="#">TFQGPPHGLQVER</a> |
| 60.0  | 1464.7838 | 0.0878 | <a href="#">TFKGPPHGIQVER</a> |
| 60.0  | 1464.7838 | 0.0878 | <a href="#">TFKGPPHGIQVER</a> |
| 60.0  | 1464.7838 | 0.0878 | <a href="#">TFQGPPHGIKVER</a> |
| 60.0  | 1464.7838 | 0.0878 | <a href="#">TFQGPPHGIKVER</a> |
| 60.0  | 1464.7474 | 0.1241 | <a href="#">TFQGPPHGIQVER</a> |
| 60.0  | 1464.7474 | 0.1241 | <a href="#">TFQGPPHGIQVER</a> |
| 60.0  | 1464.7474 | 0.1241 | <a href="#">TFQGPPHGIQVER</a> |
| 60.0  | 1464.7474 | 0.1241 | <a href="#">TFQGPPHGIQVER</a> |

Mascot: <http://www.matrixscience.com/>

**MATRIX SCIENCE Mascot Search Results**

**Peptide View Spot no 42**

MS/MS Fragmentation of **GGLDFTKDDENVNSQPFMR**

Found in **gi2961307** in **NCBInr**, ribulose-1,5-bisphosphate carboxylase [Rondeletia odorata]

Match to Query 113: 2169.179224 from(2170.186500,1+) intensity(0.0000) index(24)

Title: Label: N6, Spot\_Id: 228935, Peak\_List\_Id: 257671, MSMS Job\_Run\_Id: 24931, Comment:

Data file ppw\_N6\_138985138100.txt

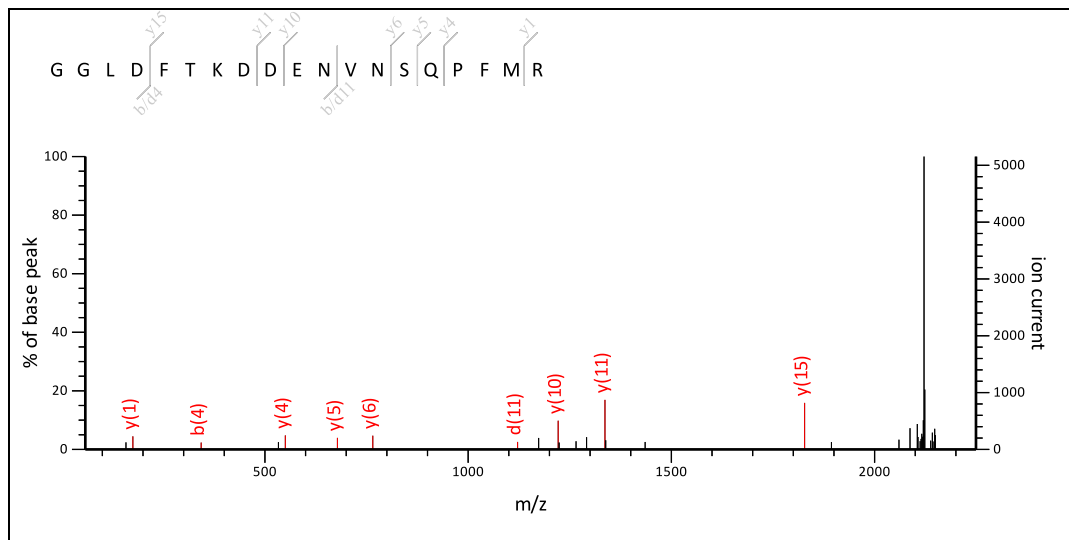

Navigation icons: Home, Back, Forward, Search, and a zoomed-in view of the mass spectrum. A search range is set from 58.11 to 2249.42.

Label all possible matches  Label matches used for scoring

Monoisotopic mass of neutral peptide Mr(calc): 2168.9797

Fixed modifications: Carbamidomethyl (C) (apply to specified residues or termini only)

Ions Score: 48 Expect: 0.053

Matches : 10/340 fragment ions using 12 most intense peaks [\(help\)](#)

| #  | Immon.   | a         | a*        | a <sup>0</sup> | b               | b*        | b <sup>0</sup> | d                | d'       | Seq. | v         | w         | w'        | y                | y*        |
|----|----------|-----------|-----------|----------------|-----------------|-----------|----------------|------------------|----------|------|-----------|-----------|-----------|------------------|-----------|
| 1  | 30.0338  | 30.0338   |           |                | 58.0287         |           |                | 44.0495          |          | G    |           |           |           |                  |           |
| 2  | 30.0338  | 87.0553   |           |                | 115.0502        |           |                |                  |          | G    |           |           |           | 2112.9655        | 2095.9389 |
| 3  | 86.0964  | 200.1394  |           |                | 228.1343        |           |                | 158.0924         |          | L    | 1997.8658 | 1996.8705 |           | 2055.9440        | 2038.9175 |
| 4  | 88.0393  | 315.1663  |           | 297.1557       | <b>343.1612</b> |           | 325.1506       | 271.1765         |          | D    | 1882.8388 | 1881.8436 |           | 1942.8600        | 1925.8334 |
| 5  | 120.0808 | 462.2347  |           | 444.2241       | 490.2296        |           | 472.2191       |                  |          | F    | 1735.7704 |           |           | <b>1827.8330</b> | 1810.8065 |
| 6  | 74.0600  | 563.2824  |           | 545.2718       | 591.2773        |           | 573.2667       | 547.2875         | 549.2667 | T    | 1634.7227 | 1647.7431 | 1649.7224 | 1680.7646        | 1663.7381 |
| 7  | 101.1073 | 691.3774  | 674.3508  | 673.3668       | 719.3723        | 702.3457  | 701.3617       | 634.3195         |          | K    | 1506.6278 | 1505.6325 |           | 1579.7169        | 1562.6904 |
| 8  | 88.0393  | 806.4043  | 789.3777  | 788.3937       | 834.3992        | 817.3727  | 816.3886       | 762.4145         |          | D    | 1391.6008 | 1390.6056 |           | 1451.6220        | 1434.5954 |
| 9  | 88.0393  | 921.4312  | 904.4047  | 903.4207       | 949.4262        | 932.3996  | 931.4156       | 877.4414         |          | D    | 1276.5739 | 1275.5786 |           | <b>1336.5950</b> | 1319.5685 |
| 10 | 102.0550 | 1050.4738 | 1033.4473 | 1032.4633      | 1078.4687       | 1061.4422 | 1060.4582      | 992.4684         |          | E    | 1147.5313 | 1146.5361 |           | <b>1221.5681</b> | 1204.5415 |
| 11 | 87.0553  | 1164.5168 | 1147.4902 | 1146.5062      | 1192.5117       | 1175.4851 | 1174.5011      | <b>1121.5109</b> |          | N    | 1033.4884 | 1032.4931 |           | 1092.5255        | 1075.4989 |
| 12 | 72.0808  | 1263.5852 | 1246.5586 | 1245.5746      | 1291.5801       | 1274.5535 | 1273.5695      | 1249.5695        |          | V    | 934.4200  | 947.4404  |           | 978.4826         | 961.4560  |
| 13 | 87.0553  | 1377.6281 | 1360.6016 | 1359.6175      | 1405.6230       | 1388.5965 | 1387.6124      | 1334.6223        |          | N    | 820.3770  | 819.3818  |           | 879.4141         | 862.3876  |
| 14 | 60.0444  | 1464.6601 | 1447.6336 | 1446.6496      | 1492.6550       | 1475.6285 | 1474.6445      | 1448.6652        |          | S    | 733.3450  | 732.3498  |           | <b>765.3712</b>  | 748.3447  |
| 15 | 101.0709 | 1592.7187 | 1575.6922 | 1574.7081      | 1620.7136       | 1603.6871 | 1602.7031      | 1535.6972        |          | Q    | 605.2864  | 604.2912  |           | <b>678.3392</b>  | 661.3126  |
| 16 | 70.0651  | 1689.7715 | 1672.7449 | 1671.7609      | 1717.7664       | 1700.7398 | 1699.7558      | 1663.7558        |          | P    | 508.2337  | 507.2384  |           | <b>550.2806</b>  | 533.2541  |
| 17 | 120.0808 | 1836.8399 | 1819.8133 | 1818.8293      | 1864.8348       | 1847.8082 | 1846.8242      |                  |          | F    | 361.1653  |           |           | 453.2279         | 436.2013  |
| 18 | 104.0528 | 1967.8804 | 1950.8538 | 1949.8698      | 1995.8753       | 1978.8487 | 1977.8647      | 1907.8770        |          | M    | 230.1248  | 229.1295  |           | 306.1594         | 289.1329  |
| 19 | 129.1135 |           |           |                |                 |           |                |                  |          | R    | 74.0237   | 73.0284   |           | <b>175.1190</b>  | 158.0924  |

| Seq | ya       | yb       | Seq | ya       | yb       | Seq  | ya       | yb       |
|-----|----------|----------|-----|----------|----------|------|----------|----------|
| GL  | 143.1179 | 171.1128 | GLD | 258.1448 | 286.1397 | GLDF | 405.2132 | 433.2082 |

|               |          |          |               |          |          |               |          |          |
|---------------|----------|----------|---------------|----------|----------|---------------|----------|----------|
| <b>GLDFT</b>  | 506.2609 | 534.2558 | <b>GLDFTK</b> | 634.3559 | 662.3508 | <b>LD</b>     | 201.1234 | 229.1183 |
| <b>LDF</b>    | 348.1918 | 376.1867 | <b>LDFT</b>   | 449.2395 | 477.2344 | <b>LDFTK</b>  | 577.3344 | 605.3293 |
| <b>LDFTKD</b> | 692.3614 | 720.3563 | <b>DF</b>     | 235.1077 | 263.1026 | <b>DFT</b>    | 336.1554 | 364.1503 |
| <b>DFTK</b>   | 464.2504 | 492.2453 | <b>DFTKD</b>  | 579.2773 | 607.2722 | <b>DFTKDD</b> | 694.3042 | 722.2992 |
| <b>FT</b>     | 221.1285 | 249.1234 | <b>FTK</b>    | 349.2234 | 377.2183 | <b>FTKD</b>   | 464.2504 | 492.2453 |
| <b>FTKDD</b>  | 579.2773 | 607.2722 | <b>TK</b>     | 202.1550 | 230.1499 | <b>TKD</b>    | 317.1819 | 345.1769 |
| <b>TKDD</b>   | 432.2089 | 460.2038 | <b>TKDDE</b>  | 561.2515 | 589.2464 | <b>TKDDEN</b> | 675.2944 | 703.2893 |
| <b>KD</b>     | 216.1343 | 244.1292 | <b>KDD</b>    | 331.1612 | 359.1561 | <b>KDDE</b>   | 460.2038 | 488.1987 |
| <b>KDDEN</b>  | 574.2467 | 602.2416 | <b>KDDENV</b> | 673.3151 | 701.3101 | <b>DD</b>     | 203.0662 | 231.0612 |
| <b>DDE</b>    | 332.1088 | 360.1038 | <b>DDEN</b>   | 446.1518 | 474.1467 | <b>DDENV</b>  | 545.2202 | 573.2151 |
| <b>DDENVN</b> | 659.2631 | 687.2580 | <b>DE</b>     | 217.0819 | 245.0768 | <b>DEN</b>    | 331.1248 | 359.1197 |
| <b>DENV</b>   | 430.1932 | 458.1882 | <b>DENVN</b>  | 544.2362 | 572.2311 | <b>DENVNS</b> | 631.2682 | 659.2631 |
| <b>EN</b>     | 216.0979 | 244.0928 | <b>ENV</b>    | 315.1663 | 343.1612 | <b>ENVN</b>   | 429.2092 | 457.2041 |
| <b>ENVNS</b>  | 516.2413 | 544.2362 | <b>ENVNSQ</b> | 644.2998 | 672.2947 | <b>NV</b>     | 186.1237 | 214.1186 |
| <b>NVN</b>    | 300.1666 | 328.1615 | <b>NVNS</b>   | 387.1987 | 415.1936 | <b>NVNSQ</b>  | 515.2572 | 543.2522 |
| <b>NVNSQP</b> | 612.3100 | 640.3049 | <b>VN</b>     | 186.1237 | 214.1186 | <b>VNS</b>    | 273.1557 | 301.1506 |
| <b>VNSQ</b>   | 401.2143 | 429.2092 | <b>VNSQP</b>  | 498.2671 | 526.2620 | <b>VNSQPF</b> | 645.3355 | 673.3304 |
| <b>NS</b>     | 174.0873 | 202.0822 | <b>NSQ</b>    | 302.1459 | 330.1408 | <b>NSQP</b>   | 399.1987 | 427.1936 |
| <b>NSQPF</b>  | 546.2671 | 574.2620 | <b>NSQPFM</b> | 677.3076 | 705.3025 | <b>SQ</b>     | 188.1030 | 216.0979 |
| <b>SQP</b>    | 285.1557 | 313.1506 | <b>SQPF</b>   | 432.2241 | 460.2191 | <b>SQPFM</b>  | 563.2646 | 591.2595 |
| <b>QP</b>     | 198.1237 | 226.1186 | <b>QPF</b>    | 345.1921 | 373.1870 | <b>QPFM</b>   | 476.2326 | 504.2275 |
| <b>PF</b>     | 217.1335 | 245.1285 | <b>PFM</b>    | 348.1740 | 376.1689 | <b>FM</b>     | 251.1213 | 279.1162 |

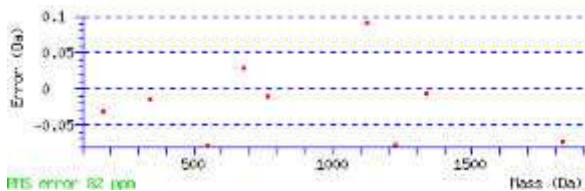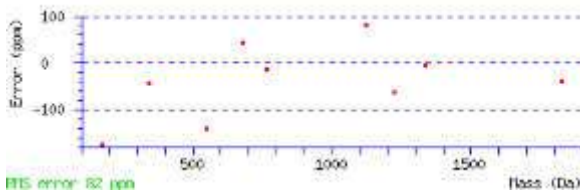

NCBI **BLAST** search of [GGLDFTKDDENVNSQPFMR](#)  
 (Parameters: blastp, nr protein database, expect=20000, no filter, PAM30)  
 Other BLAST [web gateways](#)

All matches to this query

| Score | Mr(calc)  | Delta  | Sequence                            |
|-------|-----------|--------|-------------------------------------|
| 48.0  | 2168.9797 | 0.1995 | <a href="#">GGIDFTKDDENVNSQPFMR</a> |
| 48.0  | 2168.9797 | 0.1995 | <a href="#">GGIDFTKDDENVNSQPFMR</a> |
| 48.0  | 2169.0161 | 0.1632 | <a href="#">GGLDFTKDDENVNSKPFMR</a> |
| 48.0  | 2168.9797 | 0.1995 | <a href="#">GGLDFTKDDENVNSQPFMR</a> |
| 48.0  | 2168.9797 | 0.1995 | <a href="#">GGLDFTKDDENVNSQPFMR</a> |
| 48.0  | 2168.9797 | 0.1995 | <a href="#">GGLDFTKDDENVNSQPFMR</a> |
| 48.0  | 2168.9797 | 0.1995 | <a href="#">GGLDFTKDDENVNSQPFMR</a> |
| 48.0  | 2168.9797 | 0.1995 | <a href="#">GGLDFTKDDENVNSQPFMR</a> |
| 48.0  | 2168.9797 | 0.1995 | <a href="#">GGLDFTKDDENVNSQPFMR</a> |
| 48.0  | 2168.9797 | 0.1995 | <a href="#">GGLDFTKDDENVNSQPFMR</a> |
| 48.0  | 2168.9797 | 0.1995 | <a href="#">GGLDFTKDDENVNSQPFMR</a> |

Mascot: <http://www.matrixscience.com/>

**MATRIX SCIENCE Mascot Search Results**

**Peptide View Spot no 42**

MS/MS Fragmentation of **GGLMFTKDDENVNSQPFMR**

Found in **gi2961307** in **NCB1nr**, ribulose-1,5-bisphosphate carboxylase [Rondeletia odorata]

Match to Query 115: 2185.160924 from(2186.168200,1+) intensity(0.0000) index(25)  
 Title: Label: N6, Spot\_Id: 228935, Peak\_List\_Id: 257674, MSMS Job\_Run\_Id: 24931, Comment:  
 Data file ppw\_N6\_138985138100.txt

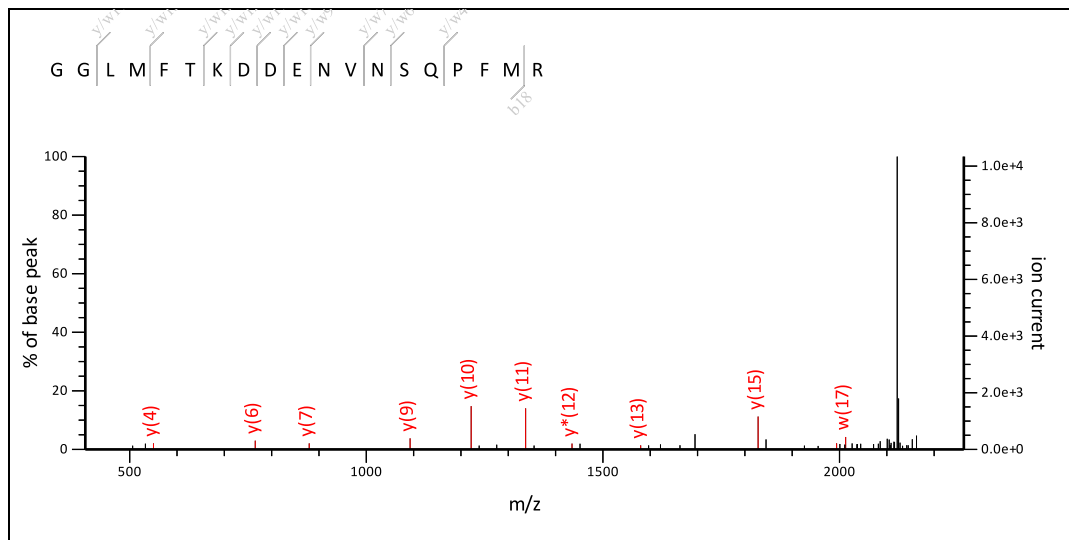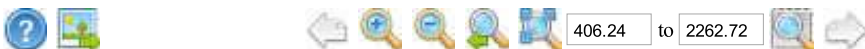

Label all possible matches  Label matches used for scoring

Monoisotopic mass of neutral peptide Mr(calc): 2184.9932  
 Fixed modifications: Carbamidomethyl (C) (apply to specified residues or termini only)  
 Ions Score: 59 Expect: 0.0046  
 Matches : 12/334 fragment ions using 13 most intense peaks ([help](#))

| #  | Immon.   | a         | a*        | a <sup>0</sup> | b         | b*        | b <sup>0</sup> | d         | d'       | Seq. | v         | w         | w'        | y         | y*        |
|----|----------|-----------|-----------|----------------|-----------|-----------|----------------|-----------|----------|------|-----------|-----------|-----------|-----------|-----------|
| 1  | 30.0338  | 30.0338   |           |                | 58.0287   |           |                | 44.0495   |          | G    |           |           |           |           |           |
| 2  | 30.0338  | 87.0553   |           |                | 115.0502  |           |                |           |          | G    |           |           |           | 2128.9790 | 2111.9525 |
| 3  | 86.0964  | 200.1394  |           |                | 228.1343  |           |                | 158.0924  |          | L    | 2013.8793 | 2012.8841 |           | 2071.9576 | 2054.9310 |
| 4  | 104.0528 | 331.1798  |           |                | 359.1748  |           |                | 271.1765  |          | M    | 1882.8388 | 1881.8436 |           | 1958.8735 | 1941.8470 |
| 5  | 120.0808 | 478.2483  |           |                | 506.2432  |           |                |           |          | F    | 1735.7704 |           |           | 1827.8330 | 1810.8065 |
| 6  | 74.0600  | 579.2959  |           | 561.2854       | 607.2908  |           | 589.2803       | 563.3010  | 565.2803 | T    | 1634.7227 | 1647.7431 | 1649.7224 | 1680.7646 | 1663.7381 |
| 7  | 101.1073 | 707.3909  | 690.3643  | 689.3803       | 735.3858  | 718.3593  | 717.3752       | 650.3330  |          | K    | 1506.6278 | 1505.6325 |           | 1579.7169 | 1562.6904 |
| 8  | 88.0393  | 822.4178  | 805.3913  | 804.4073       | 850.4128  | 833.3862  | 832.4022       | 778.4280  |          | D    | 1391.6008 | 1390.6056 |           | 1451.6220 | 1434.5954 |
| 9  | 88.0393  | 937.4448  | 920.4182  | 919.4342       | 965.4397  | 948.4131  | 947.4291       | 893.4550  |          | D    | 1276.5739 | 1275.5786 |           | 1336.5950 | 1319.5685 |
| 10 | 102.0550 | 1066.4874 | 1049.4608 | 1048.4768      | 1094.4823 | 1077.4557 | 1076.4717      | 1008.4819 |          | E    | 1147.5313 | 1146.5361 |           | 1221.5681 | 1204.5415 |
| 11 | 87.0553  | 1180.5303 | 1163.5038 | 1162.5197      | 1208.5252 | 1191.4987 | 1190.5146      | 1137.5245 |          | N    | 1033.4884 | 1032.4931 |           | 1092.5255 | 1075.4989 |
| 12 | 72.0808  | 1279.5987 | 1262.5722 | 1261.5881      | 1307.5936 | 1290.5671 | 1289.5831      | 1265.5831 |          | V    | 934.4200  | 947.4404  |           | 978.4826  | 961.4560  |
| 13 | 87.0553  | 1393.6416 | 1376.6151 | 1375.6311      | 1421.6366 | 1404.6100 | 1403.6260      | 1350.6358 |          | N    | 820.3770  | 819.3818  |           | 879.4141  | 862.3876  |
| 14 | 60.0444  | 1480.6737 | 1463.6471 | 1462.6631      | 1508.6686 | 1491.6420 | 1490.6580      | 1464.6788 |          | S    | 733.3450  | 732.3498  |           | 765.3712  | 748.3447  |
| 15 | 101.0709 | 1608.7322 | 1591.7057 | 1590.7217      | 1636.7272 | 1619.7006 | 1618.7166      | 1551.7108 |          | Q    | 605.2864  | 604.2912  |           | 678.3392  | 661.3126  |
| 16 | 70.0651  | 1705.7850 | 1688.7585 | 1687.7744      | 1733.7799 | 1716.7534 | 1715.7694      | 1679.7694 |          | P    | 508.2337  | 507.2384  |           | 550.2806  | 533.2541  |
| 17 | 120.0808 | 1852.8534 | 1835.8269 | 1834.8429      | 1880.8483 | 1863.8218 | 1862.8378      |           |          | F    | 361.1653  |           |           | 453.2279  | 436.2013  |
| 18 | 104.0528 | 1983.8939 | 1966.8674 | 1965.8833      | 2011.8888 | 1994.8623 | 1993.8783      | 1923.8905 |          | M    | 230.1248  | 229.1295  |           | 306.1594  | 289.1329  |
| 19 | 129.1135 |           |           |                |           |           |                |           |          | R    | 74.0237   | 73.0284   |           | 175.1190  | 158.0924  |

| Seq | ya       | yb       | Seq | ya       | yb       | Seq  | ya       | yb       |
|-----|----------|----------|-----|----------|----------|------|----------|----------|
| GL  | 143.1179 | 171.1128 | GLM | 274.1584 | 302.1533 | GLMF | 421.2268 | 449.2217 |

|        |          |          |        |          |          |        |          |          |
|--------|----------|----------|--------|----------|----------|--------|----------|----------|
| GLMFT  | 522.2745 | 550.2694 | GLMFTK | 650.3694 | 678.3643 | LM     | 217.1369 | 245.1318 |
| LMF    | 364.2053 | 392.2002 | LMFT   | 465.2530 | 493.2479 | LMFTK  | 593.3480 | 621.3429 |
| MF     | 251.1213 | 279.1162 | MFT    | 352.1689 | 380.1639 | MFTK   | 480.2639 | 508.2588 |
| MFTKD  | 595.2908 | 623.2858 | FT     | 221.1285 | 249.1234 | FTK    | 349.2234 | 377.2183 |
| FTKD   | 464.2504 | 492.2453 | FTKDD  | 579.2773 | 607.2722 | TK     | 202.1550 | 230.1499 |
| TKD    | 317.1819 | 345.1769 | TKDD   | 432.2089 | 460.2038 | TKDDE  | 561.2515 | 589.2464 |
| TKDDEN | 675.2944 | 703.2893 | KD     | 216.1343 | 244.1292 | KDD    | 331.1612 | 359.1561 |
| KDDE   | 460.2038 | 488.1987 | KDDEN  | 574.2467 | 602.2416 | KDDENV | 673.3151 | 701.3101 |
| DD     | 203.0662 | 231.0612 | DDE    | 332.1088 | 360.1038 | DDEN   | 446.1518 | 474.1467 |
| DDENV  | 545.2202 | 573.2151 | DDENVN | 659.2631 | 687.2580 | DE     | 217.0819 | 245.0768 |
| DEN    | 331.1248 | 359.1197 | DENV   | 430.1932 | 458.1882 | DENVN  | 544.2362 | 572.2311 |
| DENVNS | 631.2682 | 659.2631 | EN     | 216.0979 | 244.0928 | ENV    | 315.1663 | 343.1612 |
| ENVN   | 429.2092 | 457.2041 | ENVNS  | 516.2413 | 544.2362 | ENVNSQ | 644.2998 | 672.2947 |
| NV     | 186.1237 | 214.1186 | NVN    | 300.1666 | 328.1615 | NVNS   | 387.1987 | 415.1936 |
| NVNSQ  | 515.2572 | 543.2522 | NVNSQP | 612.3100 | 640.3049 | VN     | 186.1237 | 214.1186 |
| VNS    | 273.1557 | 301.1506 | VNSQ   | 401.2143 | 429.2092 | VNSQP  | 498.2671 | 526.2620 |
| VNSQPF | 645.3355 | 673.3304 | NS     | 174.0873 | 202.0822 | NSQ    | 302.1459 | 330.1408 |
| NSQP   | 399.1987 | 427.1936 | NSQPF  | 546.2671 | 574.2620 | NSQPFM | 677.3076 | 705.3025 |
| SQ     | 188.1030 | 216.0979 | SQP    | 285.1557 | 313.1506 | SQPF   | 432.2241 | 460.2191 |
| SQPFM  | 563.2646 | 591.2595 | QP     | 198.1237 | 226.1186 | QPF    | 345.1921 | 373.1870 |
| QPFM   | 476.2326 | 504.2275 | PF     | 217.1335 | 245.1285 | PFM    | 348.1740 | 376.1689 |
| FM     | 251.1213 | 279.1162 |        |          |          |        |          |          |

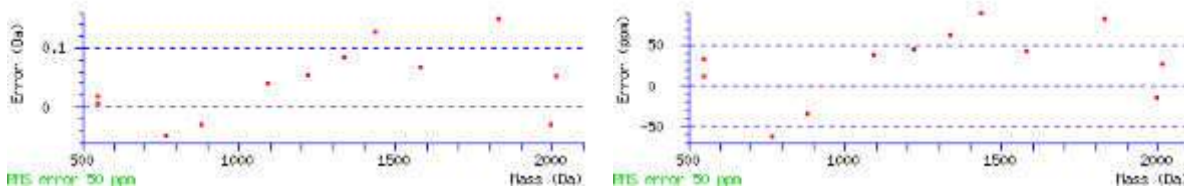

NCBI BLAST search of [GGLMFTKDDENVNSQPFMR](#)  
 (Parameters: blastp, nr protein database, expect=20000, no filter, PAM30)  
 Other BLAST [web gateways](#)

All matches to this query

| Score | Mr(calc)  | Delta  | Sequence                              |
|-------|-----------|--------|---------------------------------------|
| 58.7  | 2184.9932 | 0.1677 | <a href="#">GGLMFTKDDENVNSQPFMR</a>   |
| 43.8  | 2184.9746 | 0.1863 | <a href="#">GGLDYTKDDENVNSQPFMR</a>   |
| 28.3  | 2184.9932 | 0.1677 | <a href="#">GGLDFTKMDENVNSQPFMR</a>   |
| 16.8  | 2185.1201 | 0.0408 | <a href="#">NMLHALLTILEDEGAGGLYR</a>  |
| 16.5  | 2184.9932 | 0.1677 | <a href="#">GGLDFTKDMENVNSQPFMR</a>   |
| 11.8  | 2185.0586 | 0.1023 | <a href="#">LISGYMAQLVEDGGNHGGVPR</a> |
| 11.5  | 2185.0361 | 0.1248 | <a href="#">HLOIHESGLEEGGDEVWMK</a>   |
| 11.5  | 2185.0262 | 0.1347 | <a href="#">DWLYASGNIROLYCLOGE</a>    |
| 11.4  | 2185.0725 | 0.0884 | <a href="#">CVATSEFVNLDQLTDIETK</a>   |
| 10.1  | 2185.0646 | 0.0963 | <a href="#">IYAELCKLETDEMSTAAIK</a>   |

Mascot: <http://www.matrixscience.com/>



**MATRIX SCIENCE Mascot Search Results**

**Peptide View Spot no 45**

MS/MS Fragmentation of **RLTFDEIQSK**

Found in **gi739292** in **NCBI nr**, oxygen-evolving complex protein 1

Match to Query 22: 1235.688724 from(1236.696000,1+) intensity(0.0000) index(21)

Title: Label: N3, Spot\_Id: 219719, Peak\_List\_Id: 225482, MSMS Job\_Run\_Id: 21780, Comment:

Data file C:\Documents and Settings\Administrator\Desktop\farah BHU\spot set plate\Farah-Garima 11May 2013\ppw\_N3\_136842149300.txt

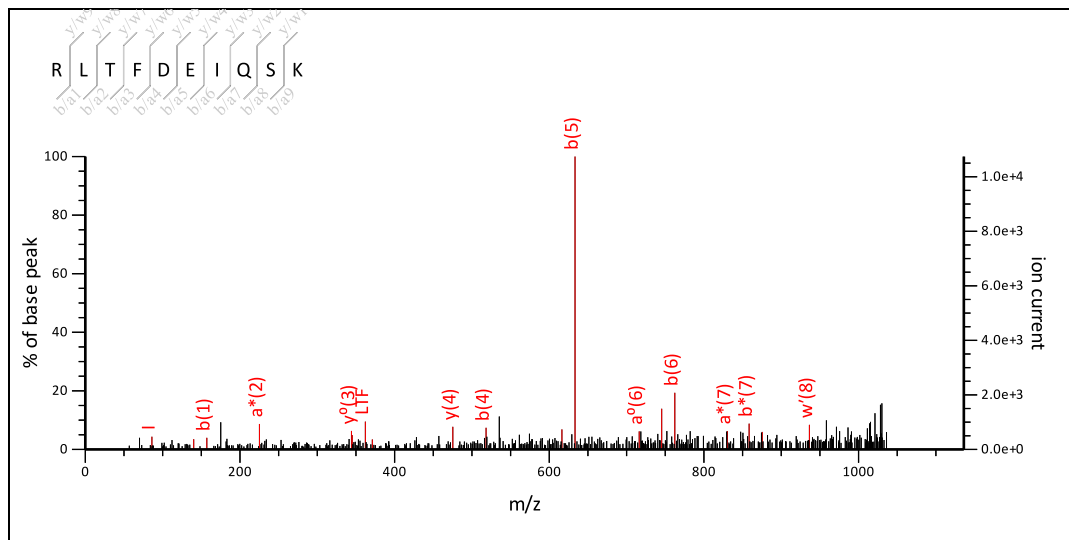

Navigation icons: Home, Back, Forward, Search, Print, Refresh, Stop. Search range: 0 to 1136.14

Label all possible matches  Label matches used for scoring

Monoisotopic mass of neutral peptide Mr(calc): 1235.6510

Fixed modifications: Carbamidomethyl (C) (apply to specified residues or termini only)

Ions Score: 31 Expect: 1.7

Matches : 23/161 fragment ions using 30 most intense peaks [\(help\)](#)

| #  | Immon.   | a         | a*        | a <sup>0</sup> | b         | b*        | b <sup>0</sup> | d         | d'       | Seq. | v         | w         | w'       | y         | y*        |
|----|----------|-----------|-----------|----------------|-----------|-----------|----------------|-----------|----------|------|-----------|-----------|----------|-----------|-----------|
| 1  | 129.1135 | 129.1135  | 112.0869  |                | 157.1084  | 140.0818  |                | 44.0495   |          | R    |           |           |          |           |           |
| 2  | 86.0964  | 242.1975  | 225.1710  |                | 270.1925  | 253.1659  |                | 200.1506  |          | L    | 1022.4789 | 1021.4837 |          | 1080.5572 | 1063.5306 |
| 3  | 74.0600  | 343.2452  | 326.2187  | 325.2347       | 371.2401  | 354.2136  | 353.2296       | 327.2503  | 329.2296 | T    | 921.4312  | 934.4516  | 936.4309 | 967.4731  | 950.4466  |
| 4  | 120.0808 | 490.3136  | 473.2871  | 472.3031       | 518.3085  | 501.2820  | 500.2980       |           |          | F    | 774.3628  |           |          | 866.4254  | 849.3989  |
| 5  | 88.0393  | 605.3406  | 588.3140  | 587.3300       | 633.3355  | 616.3089  | 615.3249       | 561.3507  |          | D    | 659.3359  | 658.3406  |          | 719.3570  | 702.3305  |
| 6  | 102.0550 | 734.3832  | 717.3566  | 716.3726       | 762.3781  | 745.3515  | 744.3675       | 676.3777  |          | E    | 530.2933  | 529.2980  |          | 604.3301  | 587.3035  |
| 7  | 86.0964  | 847.4672  | 830.4407  | 829.4567       | 875.4621  | 858.4356  | 857.4516       | 819.4359  | 833.4516 | I    | 417.2092  | 430.2296  | 444.2453 | 475.2875  | 458.2609  |
| 8  | 101.0709 | 975.5258  | 958.4993  | 957.5152       | 1003.5207 | 986.4942  | 985.5102       | 918.5043  |          | Q    | 289.1506  | 288.1554  |          | 362.2034  | 345.1769  |
| 9  | 60.0444  | 1062.5578 | 1045.5313 | 1044.5473      | 1090.5528 | 1073.5262 | 1072.5422      | 1046.5629 |          | S    | 202.1186  | 201.1234  |          | 234.1448  | 217.1183  |
| 10 | 101.1073 |           |           |                |           |           |                |           |          | K    | 74.0237   | 73.0284   |          | 147.1128  | 130.0863  |

| Seq   | ya       | yb       | Seq    | ya       | yb       | Seq   | ya       | yb       |
|-------|----------|----------|--------|----------|----------|-------|----------|----------|
| LT    | 187.1441 | 215.1390 | LTF    | 334.2125 | 362.2074 | LTFD  | 449.2395 | 477.2344 |
| LTFDE | 578.2821 | 606.2770 | LTFDEI | 691.3661 | 719.3610 | TF    | 221.1285 | 249.1234 |
| TFD   | 336.1554 | 364.1503 | TFDE   | 465.1980 | 493.1929 | TFDEI | 578.2821 | 606.2770 |
| FD    | 235.1077 | 263.1026 | FDE    | 364.1503 | 392.1452 | FDEI  | 477.2344 | 505.2293 |
| FDEIQ | 605.2930 | 633.2879 | FDEIQS | 692.3250 | 720.3199 | DE    | 217.0819 | 245.0768 |
| DEI   | 330.1660 | 358.1609 | DEIQ   | 458.2245 | 486.2195 | DEIQS | 545.2566 | 573.2515 |
| EI    | 215.1390 | 243.1339 | EIQ    | 343.1976 | 371.1925 | EIQS  | 430.2296 | 458.2245 |
| IQ    | 214.1550 | 242.1499 | IQS    | 301.1870 | 329.1819 | QS    | 188.1030 | 216.0979 |



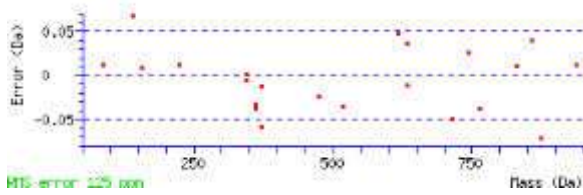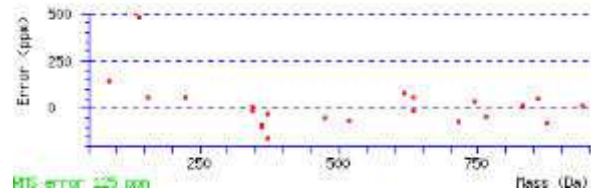

NCBI BLAST search of [RLTFDEIQSK](#)

(Parameters: blastp, nr protein database, expect=20000, no filter, PAM30)

Other BLAST [web gateways](#)

**All matches to this query**

| Score | Mr(calc)  | Delta  | Sequence                      |
|-------|-----------|--------|-------------------------------|
| 30.7  | 1235.6510 | 0.0377 | <a href="#">RLTFDEIQSK</a>    |
| 16.8  | 1235.6007 | 0.0880 | <a href="#">HHSLETDNKR</a>    |
| 14.7  | 1235.5895 | 0.0993 | <a href="#">LQNFDAQGSR</a>    |
| 14.4  | 1235.6033 | 0.0854 | <a href="#">IFLTEAEEER</a>    |
| 14.4  | 1235.5935 | 0.0953 | <a href="#">LQNSAENWK</a>     |
| 14.1  | 1235.6106 | 0.0781 | <a href="#">VGSSSGNLSVSSR</a> |
| 13.6  | 1235.6663 | 0.0225 | <a href="#">YPTLOVVNFR</a>    |
| 12.4  | 1235.5969 | 0.0919 | <a href="#">CVNTEPTFLR</a>    |
| 12.2  | 1235.5968 | 0.0919 | <a href="#">SAYGLAMPSSPR</a>  |
| 12.1  | 1235.6007 | 0.0880 | <a href="#">RFGGGEGGSAVSR</a> |

Mascot: <http://www.matrixscience.com/>

**MATRIX SCIENCE Mascot Search Results**

**Peptide View Spot no 45**

MS/MS Fragmentation of **DGIDYAAVTVQLPGGER**

Found in **gi739292** in **NCBI nr**, oxygen-evolving complex protein 1

Match to Query 35: 1759.930824 from(1760.938100,1+) intensity(0.0000) index(32)

Title: Label: N3, Spot\_Id: 219719, Peak\_List\_Id: 225497, MSMS Job\_Run\_Id: 21780, Comment:

Data file C:\Documents and Settings\Administrator\Desktop\farah BHU\spot set plate\Farah-Garima 11May 2013\ppw\_N3\_136842149300.txt

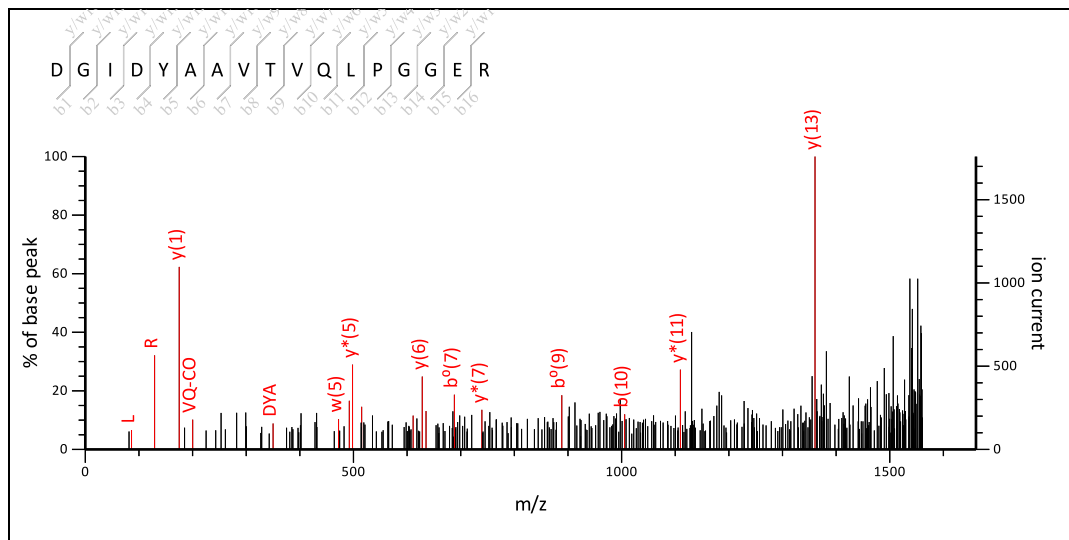

Navigation icons: Home, Back, Forward, Search, etc. Range: 0 to 1660.79

Label all possible matches  Label matches used for scoring

Monoisotopic mass of neutral peptide Mr(calc): 1759.8741

Fixed modifications: Carbamidomethyl (C) (apply to specified residues or termini only)

Ions Score: 4 Expect: 6.1e+02

Matches : 20/309 fragment ions using 45 most intense peaks (help)

| #  | Immon.   | a         | a*        | a <sup>0</sup> | b         | b*        | b <sup>0</sup> | d         | d'       | Seq. | v         | w         | w'        | y         | y*        |
|----|----------|-----------|-----------|----------------|-----------|-----------|----------------|-----------|----------|------|-----------|-----------|-----------|-----------|-----------|
| 1  | 88.0393  | 88.0393   |           | 70.0287        | 116.0342  |           | 98.0237        | 44.0495   |          | D    |           |           |           |           |           |
| 2  | 30.0338  | 145.0608  |           | 127.0502       | 173.0557  |           | 155.0451       |           |          | G    |           |           |           | 1645.8544 | 1628.8279 |
| 3  | 86.0964  | 258.1448  |           | 240.1343       | 286.1397  |           | 268.1292       | 230.1135  | 244.1292 | I    | 1530.7547 | 1543.7751 | 1557.7908 | 1588.8329 | 1571.8064 |
| 4  | 88.0393  | 373.1718  |           | 355.1612       | 401.1667  |           | 383.1561       | 329.1819  |          | D    | 1415.7278 | 1414.7325 |           | 1475.7489 | 1458.7223 |
| 5  | 136.0757 | 536.2351  |           | 518.2245       | 564.2300  |           | 546.2195       |           |          | Y    | 1252.6644 |           |           | 1360.7219 | 1343.6954 |
| 6  | 44.0495  | 607.2722  |           | 589.2617       | 635.2671  |           | 617.2566       |           |          | A    | 1181.6273 |           |           | 1197.6586 | 1180.6321 |
| 7  | 44.0495  | 678.3093  |           | 660.2988       | 706.3042  |           | 688.2937       |           |          | A    | 1110.5902 |           |           | 1126.6215 | 1109.5950 |
| 8  | 72.0808  | 777.3777  |           | 759.3672       | 805.3727  |           | 787.3621       | 763.3621  |          | V    | 1011.5218 | 1024.5422 |           | 1055.5844 | 1038.5578 |
| 9  | 74.0600  | 878.4254  |           | 860.4149       | 906.4203  |           | 888.4098       | 862.4305  | 864.4098 | T    | 910.4741  | 923.4945  | 925.4738  | 956.5160  | 939.4894  |
| 10 | 72.0808  | 977.4938  |           | 959.4833       | 1005.4888 |           | 987.4782       | 963.4782  |          | V    | 811.4057  | 824.4261  |           | 855.4683  | 838.4417  |
| 11 | 101.0709 | 1105.5524 | 1088.5259 | 1087.5419      | 1133.5473 | 1116.5208 | 1115.5368      | 1048.5310 |          | Q    | 683.3471  | 682.3519  |           | 756.3999  | 739.3733  |
| 12 | 86.0964  | 1218.6365 | 1201.6099 | 1200.6259      | 1246.6314 | 1229.6048 | 1228.6208      | 1176.5895 |          | L    | 570.2631  | 569.2678  |           | 628.3413  | 611.3148  |
| 13 | 70.0651  | 1315.6892 | 1298.6627 | 1297.6787      | 1343.6842 | 1326.6576 | 1325.6736      | 1289.6736 |          | P    | 473.2103  | 472.2150  |           | 515.2572  | 498.2307  |
| 14 | 30.0338  | 1372.7107 | 1355.6842 | 1354.7001      | 1400.7056 | 1383.6791 | 1382.6951      |           |          | G    |           |           |           | 418.2045  | 401.1779  |
| 15 | 30.0338  | 1429.7322 | 1412.7056 | 1411.7216      | 1457.7271 | 1440.7005 | 1439.7165      |           |          | G    |           |           |           | 361.1830  | 344.1565  |
| 16 | 102.0550 | 1558.7748 | 1541.7482 | 1540.7642      | 1586.7697 | 1569.7431 | 1568.7591      | 1500.7693 |          | E    | 230.1248  | 229.1295  |           | 304.1615  | 287.1350  |
| 17 | 129.1135 |           |           |                |           |           |                |           |          | R    | 74.0237   | 73.0284   |           | 175.1190  | 158.0924  |

| Seq   | ya       | yb       | Seq    | ya       | yb       | Seq     | ya       | yb       |
|-------|----------|----------|--------|----------|----------|---------|----------|----------|
| GI    | 143.1179 | 171.1128 | GID    | 258.1448 | 286.1397 | GIDY    | 421.2082 | 449.2031 |
| GIDYA | 492.2453 | 520.2402 | GIDYAA | 563.2824 | 591.2773 | GIDYAAV | 662.3508 | 690.3457 |
| ID    | 201.1234 | 229.1183 | IDY    | 364.1867 | 392.1816 | IDYA    | 435.2238 | 463.2187 |
| IDYAA | 506.2609 | 534.2558 | IDYAAV | 605.3293 | 633.3243 | DY      | 251.1026 | 279.0975 |

|                |          |                 |                |                 |          |               |                 |          |
|----------------|----------|-----------------|----------------|-----------------|----------|---------------|-----------------|----------|
| <b>DYA</b>     | 322.1397 | <b>350.1347</b> | <b>DYAA</b>    | 393.1769        | 421.1718 | <b>DYAAV</b>  | <b>492.2453</b> | 520.2402 |
| <b>DYAAVT</b>  | 593.2930 | 621.2879        | <b>DYAAVTV</b> | 692.3614        | 720.3563 | <b>YA</b>     | 207.1128        | 235.1077 |
| <b>YAA</b>     | 278.1499 | 306.1448        | <b>YAAV</b>    | 377.2183        | 405.2132 | <b>YAAVT</b>  | 478.2660        | 506.2609 |
| <b>YAAVTV</b>  | 577.3344 | 605.3293        | <b>AA</b>      | 115.0866        | 143.0815 | <b>AAV</b>    | 214.1550        | 242.1499 |
| <b>AAVT</b>    | 315.2027 | 343.1976        | <b>AAVTV</b>   | 414.2711        | 442.2660 | <b>AAVTVQ</b> | 542.3297        | 570.3246 |
| <b>AAVTVQL</b> | 655.4137 | 683.4087        | <b>AV</b>      | 143.1179        | 171.1128 | <b>AVT</b>    | 244.1656        | 272.1605 |
| <b>AVTV</b>    | 343.2340 | 371.2289        | <b>AVTVQ</b>   | 471.2926        | 499.2875 | <b>AVTVQL</b> | 584.3766        | 612.3715 |
| <b>AVTVQLP</b> | 681.4294 | 709.4243        | <b>VT</b>      | 173.1285        | 201.1234 | <b>VTV</b>    | 272.1969        | 300.1918 |
| <b>VTVQ</b>    | 400.2554 | 428.2504        | <b>VTVQL</b>   | 513.3395        | 541.3344 | <b>VTVQLP</b> | 610.3923        | 638.3872 |
| <b>VTVQLPG</b> | 667.4137 | 695.4087        | <b>TV</b>      | 173.1285        | 201.1234 | <b>TVQ</b>    | 301.1870        | 329.1819 |
| <b>TVQL</b>    | 414.2711 | 442.2660        | <b>TVQLP</b>   | 511.3239        | 539.3188 | <b>TVQLPG</b> | 568.3453        | 596.3402 |
| <b>TVQLPGG</b> | 625.3668 | 653.3617        | <b>VQ</b>      | <b>200.1394</b> | 228.1343 | <b>VQL</b>    | 313.2234        | 341.2183 |
| <b>VQLP</b>    | 410.2762 | 438.2711        | <b>VQLPG</b>   | 467.2976        | 495.2926 | <b>VQLPGG</b> | 524.3191        | 552.3140 |
| <b>VQLPGGE</b> | 653.3617 | 681.3566        | <b>QL</b>      | 214.1550        | 242.1499 | <b>QLP</b>    | 311.2078        | 339.2027 |
| <b>QLPG</b>    | 368.2292 | 396.2241        | <b>QLPGG</b>   | 425.2507        | 453.2456 | <b>QLPGGE</b> | 554.2933        | 582.2882 |
| <b>LP</b>      | 183.1492 | 211.1441        | <b>LPG</b>     | 240.1707        | 268.1656 | <b>LPGG</b>   | 297.1921        | 325.1870 |
| <b>LPGGE</b>   | 426.2347 | 454.2296        | <b>PG</b>      | 127.0866        | 155.0815 | <b>PGG</b>    | 184.1081        | 212.1030 |
| <b>PGGE</b>    | 313.1506 | 341.1456        | <b>GG</b>      | 87.0553         | 115.0502 | <b>GGE</b>    | 216.0979        | 244.0928 |
| <b>GE</b>      | 159.0764 | 187.0713        |                |                 |          |               |                 |          |

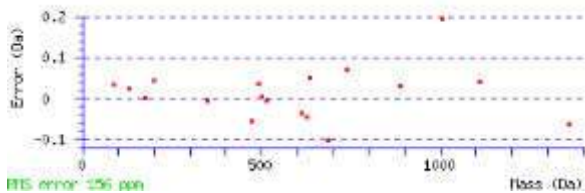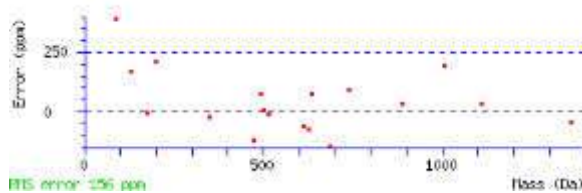

NCBI BLAST search of [DGIDYAAVTVOLPGGER](#)

(Parameters: blastp, nr protein database, expect=20000, no filter, PAM30)

Other BLAST [web gateways](#)

#### All matches to this query

| Score | Mr(calcd) | Delta   | Sequence                           |
|-------|-----------|---------|------------------------------------|
| 9.4   | 1759.8840 | 0.0469  | <a href="#">IVAESTDDVIDGPSSKK</a>  |
| 8.9   | 1759.9026 | 0.0282  | <a href="#">SDLKVINDCLDDLIK</a>    |
| 6.8   | 1759.9316 | -0.0007 | <a href="#">ISTVETELOKLSQER</a>    |
| 6.5   | 1759.9832 | -0.0524 | <a href="#">LPASPPVILAAAGTTPER</a> |
| 4.8   | 1759.8159 | 0.1149  | <a href="#">EEMPOQVASGEOAGKR</a>   |
| 4.8   | 1759.8597 | 0.0711  | <a href="#">GCALLLDLDCNDLIR</a>    |
| 4.7   | 1759.8523 | 0.0786  | <a href="#">AESNPDAASMVDRLLR</a>   |
| 4.4   | 1759.8741 | 0.0567  | <a href="#">DGIDYAAVTVOLPGGER</a>  |
| 4.3   | 1759.9502 | -0.0194 | <a href="#">LSSIVTGLQMOEVSLR</a>   |
| 3.9   | 1759.9356 | -0.0048 | <a href="#">AVGVLYAVVDDIIEER</a>   |

Mascot: <http://www.matrixscience.com/>

**MATRIX SCIENCE Mascot Search Results**

**Peptide View Spot no 45**

MS/MS Fragmentation of **NLVATGKPESEFGGPFLLVPSYR**

Found in **gi739292** in **NCBI nr**, oxygen-evolving complex protein 1

Match to Query 159: 2235.221024 from(2236.228300,1+) intensity(0.0000) index(34)

Title: Label: N3, Spot\_Id: 219719, Peak\_List\_Id: 225485, MSMS Job\_Run\_Id: 21780, Comment:

Data file C:\Documents and Settings\Administrator\Desktop\farah BHU\spot set plate\Farah-Garima 11May 2013\ppw\_N3\_136842149300.txt

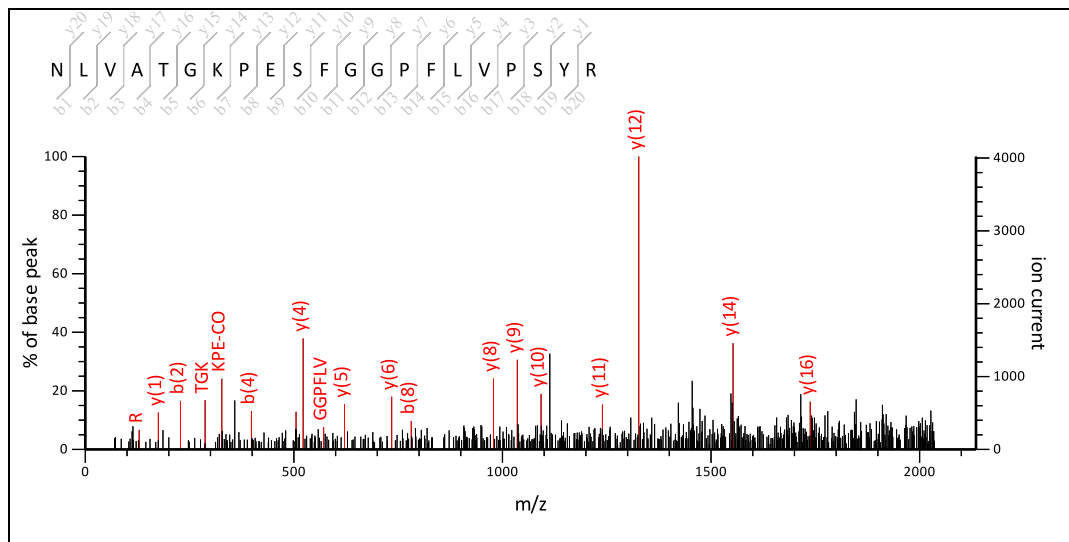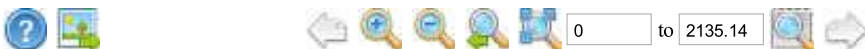

Label all possible matches  Label matches used for scoring

Monoisotopic mass of neutral peptide Mr(calc): 2235.1688

Fixed modifications: Carbamidomethyl (C) (apply to specified residues or termini only)

Ions Score: 57 Expect: 0.0027

Matches : 20/412 fragment ions using 40 most intense peaks [\(help\)](#)

| #  | Immon.          | a         | a*        | a <sup>0</sup> | b               | b*        | b <sup>0</sup> | d         | d'       | Seq. | v         | w         | w'        | y                | y*              |
|----|-----------------|-----------|-----------|----------------|-----------------|-----------|----------------|-----------|----------|------|-----------|-----------|-----------|------------------|-----------------|
| 1  | 87.0553         | 87.0553   | 70.0287   |                | 115.0502        | 98.0237   |                | 44.0495   |          | N    |           |           |           |                  |                 |
| 2  | 86.0964         | 200.1394  | 183.1128  |                | <b>228.1343</b> | 211.1077  |                | 158.0924  |          | L    | 2064.0549 | 2063.0597 |           | 2122.1332        | 2105.1066       |
| 3  | 72.0808         | 299.2078  | 282.1812  |                | <b>327.2027</b> | 310.1761  |                | 285.1921  |          | V    | 1964.9865 | 1978.0069 |           | 2009.0491        | 1992.0225       |
| 4  | 44.0495         | 370.2449  | 353.2183  |                | <b>398.2398</b> | 381.2132  |                |           |          | A    | 1893.9494 |           |           | 1909.9807        | 1892.9541       |
| 5  | 74.0600         | 471.2926  | 454.2660  | 453.2820       | 499.2875        | 482.2609  | 481.2769       | 455.2976  | 457.2769 | T    | 1792.9017 | 1805.9221 | 1807.9014 | 1838.9436        | 1821.9170       |
| 6  | 30.0338         | 528.3140  | 511.2875  | 510.3035       | 556.3089        | 539.2824  | 538.2984       |           |          | G    |           |           |           | <b>1737.8959</b> | 1720.8693       |
| 7  | 101.1073        | 656.4090  | 639.3824  | 638.3984       | 684.4039        | 667.3774  | 666.3933       | 599.3511  |          | K    | 1607.7853 | 1606.7900 |           | 1680.8744        | 1663.8479       |
| 8  | 70.0651         | 753.4618  | 736.4352  | 735.4512       | <b>781.4567</b> | 764.4301  | 763.4461       | 727.4461  |          | P    | 1510.7325 | 1509.7373 |           | <b>1552.7795</b> | 1535.7529       |
| 9  | 102.0550        | 882.5043  | 865.4778  | 864.4938       | 910.4993        | 893.4727  | 892.4887       | 824.4989  |          | E    | 1381.6899 | 1380.6947 |           | 1455.7267        | 1438.7001       |
| 10 | 60.0444         | 969.5364  | 952.5098  | 951.5258       | 997.5313        | 980.5047  | 979.5207       | 953.5415  |          | S    | 1294.6579 | 1293.6626 |           | <b>1326.6841</b> | 1309.6576       |
| 11 | 120.0808        | 1116.6048 | 1099.5782 | 1098.5942      | 1144.5997       | 1127.5732 | 1126.5891      |           |          | F    | 1147.5895 |           |           | <b>1239.6521</b> | 1222.6255       |
| 12 | 30.0338         | 1173.6262 | 1156.5997 | 1155.6157      | 1201.6212       | 1184.5946 | 1183.6106      |           |          | G    |           |           |           | <b>1092.5837</b> | 1075.5571       |
| 13 | 30.0338         | 1230.6477 | 1213.6212 | 1212.6371      | 1258.6426       | 1241.6161 | 1240.6321      |           |          | G    |           |           |           | <b>1035.5622</b> | 1018.5356       |
| 14 | 70.0651         | 1327.7005 | 1310.6739 | 1309.6899      | 1355.6954       | 1338.6688 | 1337.6848      | 1301.6848 |          | P    | 936.4938  | 935.4985  |           | <b>978.5407</b>  | 961.5142        |
| 15 | 120.0808        | 1474.7689 | 1457.7423 | 1456.7583      | 1502.7638       | 1485.7373 | 1484.7532      |           |          | F    | 789.4254  |           |           | 881.4880         | 864.4614        |
| 16 | 86.0964         | 1587.8530 | 1570.8264 | 1569.8424      | 1615.8479       | 1598.8213 | 1597.8373      | 1545.8060 |          | L    | 676.3413  | 675.3461  |           | <b>734.4196</b>  | 717.3930        |
| 17 | 72.0808         | 1686.9214 | 1669.8948 | 1668.9108      | 1714.9163       | 1697.8897 | 1696.9057      | 1672.9057 |          | V    | 577.2729  | 590.2933  |           | <b>621.3355</b>  | 604.3089        |
| 18 | 70.0651         | 1783.9741 | 1766.9476 | 1765.9636      | 1811.9690       | 1794.9425 | 1793.9585      | 1757.9585 |          | P    | 480.2201  | 479.2249  |           | <b>522.2671</b>  | <b>505.2405</b> |
| 19 | 60.0444         | 1871.0062 | 1853.9796 | 1852.9956      | 1899.0011       | 1881.9745 | 1880.9905      | 1855.0112 |          | S    | 393.1881  | 392.1928  |           | 425.2143         | 408.1878        |
| 20 | 136.0757        | 2034.0695 | 2017.0429 | 2016.0589      | 2062.0644       | 2045.0379 | 2044.0538      |           |          | Y    | 230.1248  |           |           | 338.1823         | 321.1557        |
| 21 | <b>129.1135</b> |           |           |                |                 |           |                |           |          | R    | 74.0237   | 73.0284   |           | <b>175.1190</b>  | 158.0924        |

| Seq | ya | yb | Seq | ya | yb | Seq | ya | yb |
|-----|----|----|-----|----|----|-----|----|----|
|     |    |    |     |    |    |     |    |    |

|        |          |          |         |          |          |         |          |          |
|--------|----------|----------|---------|----------|----------|---------|----------|----------|
| LV     | 185.1648 | 213.1598 | LVA     | 256.2020 | 284.1969 | LVAT    | 357.2496 | 385.2445 |
| LVATG  | 414.2711 | 442.2660 | LVATGK  | 542.3661 | 570.3610 | LVATGKP | 639.4188 | 667.4137 |
| VA     | 143.1179 | 171.1128 | VAT     | 244.1656 | 272.1605 | VATG    | 301.1870 | 329.1819 |
| VATGK  | 429.2820 | 457.2769 | VATGKP  | 526.3348 | 554.3297 | VATGKPE | 655.3774 | 683.3723 |
| AT     | 145.0972 | 173.0921 | ATG     | 202.1186 | 230.1135 | ATGK    | 330.2136 | 358.2085 |
| ATGKP  | 427.2663 | 455.2613 | ATGKPE  | 556.3089 | 584.3039 | ATGKPES | 643.3410 | 671.3359 |
| TG     | 131.0815 | 159.0764 | TGK     | 259.1765 | 287.1714 | TGKP    | 356.2292 | 384.2241 |
| TGKPE  | 485.2718 | 513.2667 | TGKPES  | 572.3039 | 600.2988 | GK      | 158.1288 | 186.1237 |
| GKP    | 255.1816 | 283.1765 | GKPE    | 384.2241 | 412.2191 | GKPES   | 471.2562 | 499.2511 |
| GKPESF | 618.3246 | 646.3195 | GKPESFG | 675.3461 | 703.3410 | KP      | 198.1601 | 226.1550 |
| KPE    | 327.2027 | 355.1976 | KPES    | 414.2347 | 442.2296 | KPESF   | 561.3031 | 589.2980 |
| KPESFG | 618.3246 | 646.3195 | KPESFGG | 675.3461 | 703.3410 | PE      | 199.1077 | 227.1026 |
| PES    | 286.1397 | 314.1347 | PESF    | 433.2082 | 461.2031 | PESFG   | 490.2296 | 518.2245 |
| PESFGG | 547.2511 | 575.2460 | PESFGGP | 644.3039 | 672.2988 | ES      | 189.0870 | 217.0819 |
| ESF    | 336.1554 | 364.1503 | ESFG    | 393.1769 | 421.1718 | ESFGG   | 450.1983 | 478.1932 |
| ESFGGP | 547.2511 | 575.2460 | ESFGGPF | 694.3195 | 722.3144 | SF      | 207.1128 | 235.1077 |
| SFG    | 264.1343 | 292.1292 | SFGG    | 321.1557 | 349.1506 | SFGGP   | 418.2085 | 446.2034 |
| SFGGPF | 565.2769 | 593.2718 | SFGGPFL | 678.3610 | 706.3559 | FG      | 177.1022 | 205.0972 |
| FGG    | 234.1237 | 262.1186 | FGGP    | 331.1765 | 359.1714 | FGGPF   | 478.2449 | 506.2398 |
| FGGPFL | 591.3289 | 619.3239 | FGGPFLV | 690.3974 | 718.3923 | GG      | 87.0553  | 115.0502 |
| GGP    | 184.1081 | 212.1030 | GGPF    | 331.1765 | 359.1714 | GGPFL   | 444.2605 | 472.2554 |
| GGPFLV | 543.3289 | 571.3239 | GGPFLVP | 640.3817 | 668.3766 | GP      | 127.0866 | 155.0815 |
| GPF    | 274.1550 | 302.1499 | GPFL    | 387.2391 | 415.2340 | GPFLV   | 486.3075 | 514.3024 |
| GPFLVP | 583.3602 | 611.3552 | GPFLVPS | 670.3923 | 698.3872 | PF      | 217.1335 | 245.1285 |
| PFL    | 330.2176 | 358.2125 | PFLV    | 429.2860 | 457.2809 | PFLVP   | 526.3388 | 554.3337 |
| PFLVPS | 613.3708 | 641.3657 | FL      | 233.1648 | 261.1598 | FLV     | 332.2333 | 360.2282 |
| FLVP   | 429.2860 | 457.2809 | FLVPS   | 516.3180 | 544.3130 | FLVPSY  | 679.3814 | 707.3763 |
| LV     | 185.1648 | 213.1598 | LVP     | 282.2176 | 310.2125 | LVPS    | 369.2496 | 397.2445 |
| LVPSY  | 532.3130 | 560.3079 | VP      | 169.1335 | 197.1285 | VPS     | 256.1656 | 284.1605 |
| VPSY   | 419.2289 | 447.2238 | PS      | 157.0972 | 185.0921 | PSY     | 320.1605 | 348.1554 |
| SY     | 223.1077 | 251.1026 |         |          |          |         |          |          |

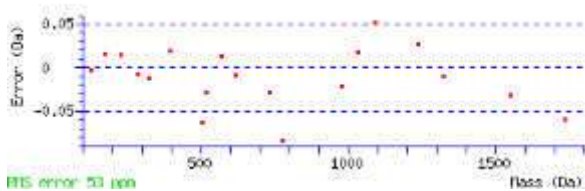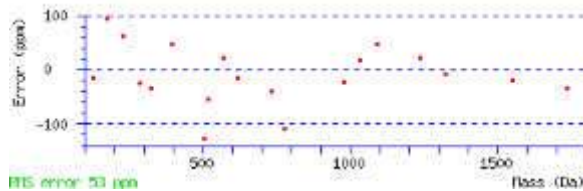

NCBI BLAST search of [NLVATGKPEFSGGPFVPSYR](#)  
 (Parameters: blastp, nr protein database, expect=20000, no filter, PAM30)  
 Other BLAST [web gateways](#)

All matches to this query

| Score | Mr(calcd) | Delta   | Sequence                                |
|-------|-----------|---------|-----------------------------------------|
| 57.4  | 2235.1688 | 0.0522  | <a href="#">NLVATGKPEFSGGPFVPSYR</a>    |
| 32.7  | 2235.1688 | 0.0522  | <a href="#">QLVATGKPDSEFGGPFVPSYR</a>   |
| 7.9   | 2235.0916 | 0.1295  | <a href="#">LAVLVGDYMGGPVVDPSMLR</a>    |
| 5.5   | 2235.1933 | 0.0277  | <a href="#">KVVISGSAEGVOMANYLLTQK</a>   |
| 4.7   | 2235.1259 | 0.0951  | <a href="#">OPTASAOETFTRPWLALFDR</a>    |
| 4.4   | 2235.0452 | 0.1758  | <a href="#">WKEIPFQSPASDLPNGMMR</a>     |
| 4.4   | 2235.1102 | 0.1108  | <a href="#">MCELETVVGGFVIVATHVMK</a>    |
| 4.0   | 2235.2331 | -0.0120 | <a href="#">VRVALMMSAGVTTAAVLVSSK</a>   |
| 3.4   | 2235.1899 | 0.0311  | <a href="#">IIETSEVSVPANAAPOPEPIR</a>   |
| 3.1   | 2235.1859 | 0.0352  | <a href="#">LALGDNALPEAGIGAIASOLADR</a> |

Mascot: <http://www.matrixscience.com/>

**MATRIX SCIENCE Mascot Search Results**

**Peptide View Spot no 47**

MS/MS Fragmentation of **ITREPGPVK**

Found in **gi162461576** in **NCBINr**, glyoxylase1 [Zea mays]

Match to Query 27: 995.564684 from(996.571960,1+) intensity(0.0000) index(7)

Title: Label: M3, Spot\_Id: 219718, Peak\_List\_Id: 225458, MSMS Job\_Run\_Id: 21779, Comment:

Data file C:\Documents and Settings\Administrator\Desktop\farah BHU\spot set plate\Farah-Garima 11May 2013\ppw\_M3\_136842147700.txt

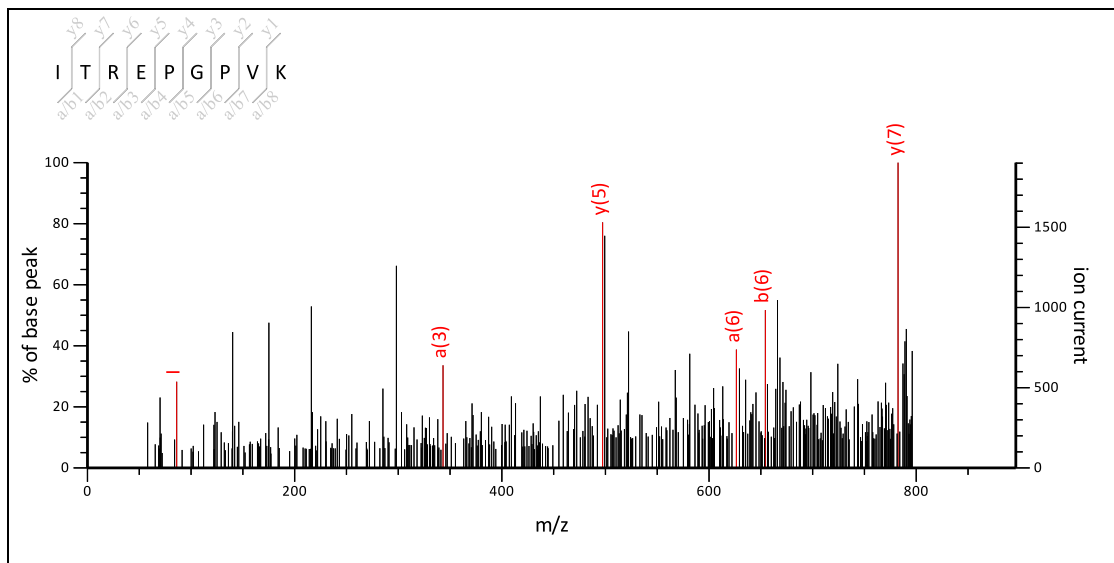

Navigation icons: ? Home Back Forward Search 0 to 896.13

Label all possible matches  Label matches used for scoring

Monoisotopic mass of neutral peptide Mr(calc): 995.5764

Fixed modifications: Carbamidomethyl (C) (apply to specified residues or termini only)

Ions Score: 12 Expect: 1.1e+02

Matches : 9/133 fragment ions using 16 most intense peaks (help)

| # | Immon.   | a        | a*       | a <sup>0</sup> | b        | b*       | b <sup>0</sup> | d        | d'       | Seq. | v        | w        | w'       | y        | y*       | y <sup>0</sup> | # |
|---|----------|----------|----------|----------------|----------|----------|----------------|----------|----------|------|----------|----------|----------|----------|----------|----------------|---|
| 1 | 86.0964  | 86.0964  |          |                | 114.0913 |          |                | 44.0495  |          | I    |          |          |          |          |          |                | 9 |
| 2 | 74.0600  | 187.1441 |          | 169.1335       | 215.1390 |          | 197.1285       | 171.1492 | 173.1285 | T    | 837.4577 | 850.4781 | 852.4574 | 883.4996 | 866.4730 | 865.4890       | 8 |
| 3 | 129.1135 | 343.2452 | 326.2187 | 325.2346       | 371.2401 | 354.2136 | 353.2296       | 258.1812 |          | R    | 681.3566 | 680.3614 |          | 782.4519 | 765.4254 | 764.4413       | 7 |
| 4 | 102.0550 | 472.2878 | 455.2613 | 454.2772       | 500.2827 | 483.2562 | 482.2722       | 414.2823 |          | E    | 552.3140 | 551.3188 |          | 626.3508 | 609.3243 | 608.3402       | 6 |
| 5 | 70.0651  | 569.3406 | 552.3140 | 551.3300       | 597.3355 | 580.3089 | 579.3249       | 543.3249 |          | P    | 455.2613 | 454.2660 |          | 497.3082 | 480.2817 |                | 5 |
| 6 | 30.0338  | 626.3620 | 609.3355 | 608.3515       | 654.3570 | 637.3304 | 636.3464       |          |          | G    |          |          |          | 400.2554 | 383.2289 |                | 4 |
| 7 | 70.0651  | 723.4148 | 706.3883 | 705.4042       | 751.4097 | 734.3832 | 733.3992       | 697.3992 |          | P    | 301.1870 | 300.1918 |          | 343.2340 | 326.2074 |                | 3 |
| 8 | 72.0808  | 822.4832 | 805.4567 | 804.4726       | 850.4781 | 833.4516 | 832.4676       | 808.4676 |          | V    | 202.1186 | 215.1390 |          | 246.1812 | 229.1547 |                | 2 |
| 9 | 101.1073 |          |          |                |          |          |                |          |          | K    | 74.0237  | 73.0284  |          | 147.1128 | 130.0863 |                | 1 |

| Seq    | ya       | yb       | Seq    | ya       | yb       | Seq   | ya       | yb       |
|--------|----------|----------|--------|----------|----------|-------|----------|----------|
| TR     | 230.1612 | 258.1561 | TRE    | 359.2037 | 387.1987 | TREP  | 456.2565 | 484.2514 |
| TREPG  | 513.2780 | 541.2729 | TREPGP | 610.3307 | 638.3257 | RE    | 258.1561 | 286.1510 |
| REP    | 355.2088 | 383.2037 | REPG   | 412.2303 | 440.2252 | REPGP | 509.2831 | 537.2780 |
| REPGPV | 608.3515 | 636.3464 | EP     | 199.1077 | 227.1026 | EPG   | 256.1292 | 284.1241 |
| EPGP   | 353.1819 | 381.1769 | EPGPV  | 452.2504 | 480.2453 | PG    | 127.0866 | 155.0815 |
| PGP    | 224.1394 | 252.1343 | PGPV   | 323.2078 | 351.2027 | GP    | 127.0866 | 155.0815 |
| GPV    | 226.1550 | 254.1499 | PV     | 169.1335 | 197.1285 |       |          |          |

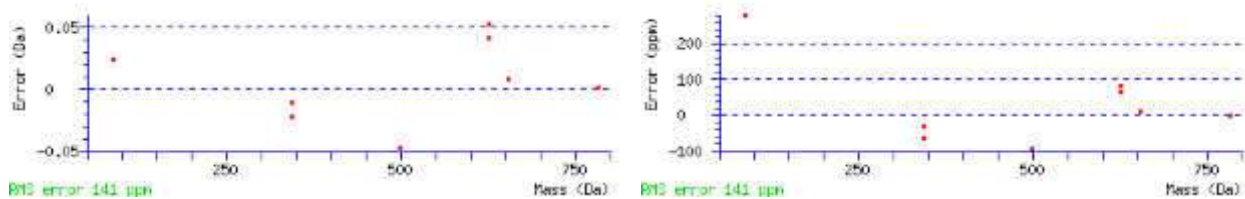

NCBI **BLAST** search of [ITREPGPVK](#)

(Parameters: blastp, nr protein database, expect=20000, no filter, PAM30)

Other BLAST [web gateways](#)

**All matches to this query**

| Score | Mr(calc) | Delta   | Sequence                   |
|-------|----------|---------|----------------------------|
| 12.0  | 995.5764 | -0.0117 | <a href="#">ITREPGPVK</a>  |
| 10.2  | 995.6128 | -0.0481 | <a href="#">VDKGPLLVR</a>  |
| 8.6   | 995.6240 | -0.0593 | <a href="#">LSAILRAPR</a>  |
| 8.3   | 995.6127 | -0.0481 | <a href="#">TINLLIPGR</a>  |
| 8.2   | 995.6128 | -0.0481 | <a href="#">LOTLVVPAR</a>  |
| 8.1   | 995.5764 | -0.0117 | <a href="#">LLVAAGAEPR</a> |
| 8.1   | 995.6128 | -0.0481 | <a href="#">AVOILTVPR</a>  |
| 8.1   | 995.6128 | -0.0481 | <a href="#">LLVATPVAGR</a> |
| 8.0   | 995.6240 | -0.0593 | <a href="#">ILASRLAPR</a>  |
| 8.0   | 995.6240 | -0.0593 | <a href="#">LLASRLAPR</a>  |

Mascot: <http://www.matrixscience.com/>



**MATRIX SCIENCE Mascot Search Results**

**Peptide View Spot no 47**

MS/MS Fragmentation of **SIKFYEK**

Found in **gi162461576** in **NCBI nr**, glyoxylase 1 [Zea mays]

Match to Query 11: 913.476614 from(914.483890,1+) intensity(0.0000) index(3)

Title: Label: M3, Spot\_Id: 219718, Peak\_List\_Id: 225455, MSMS Job\_Run\_Id: 21779, Comment:

Data file C:\Documents and Settings\Administrator\Desktop\farah BHU\spot set plate\Farah-Garima 11May 2013\ppw\_M3\_136842147700.txt

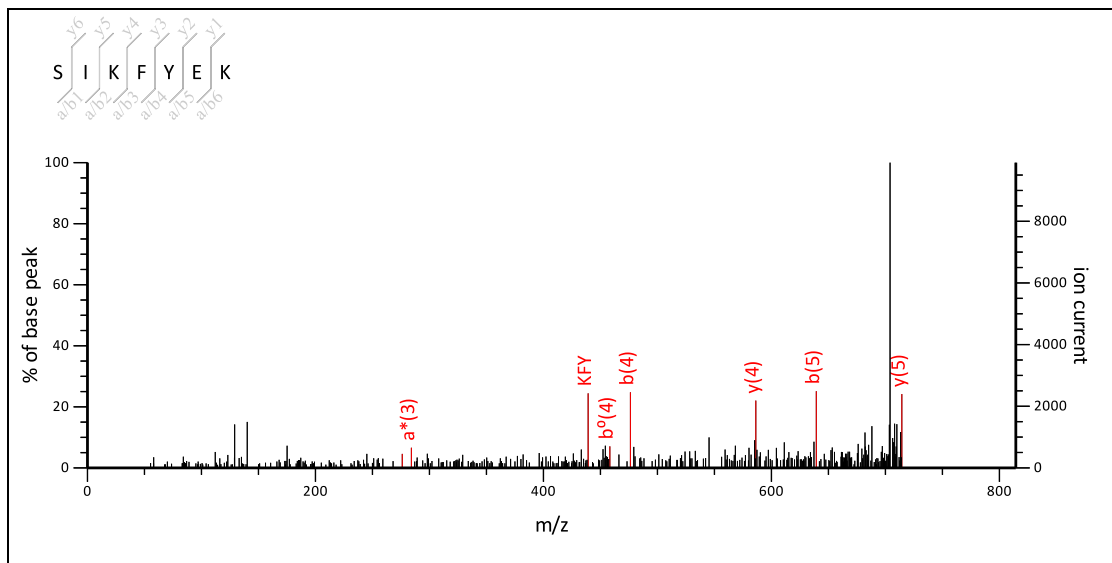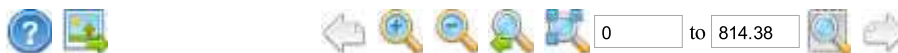

Label all possible matches  Label matches used for scoring

Monoisotopic mass of neutral peptide Mr(calc): 913.4909

Fixed modifications: Carbamidomethyl (C) (apply to specified residues or termini only)

Ions Score: 13 Expect: 1.6e+02

Matches : 10/92 fragment ions using 21 most intense peaks (help)

| # | Immon.   | a        | a*       | a <sup>0</sup> | b        | b*       | b <sup>0</sup> | d        | d'       | Seq. | v        | w        | w'       | y        | y*       | y <sup>0</sup> | # |
|---|----------|----------|----------|----------------|----------|----------|----------------|----------|----------|------|----------|----------|----------|----------|----------|----------------|---|
| 1 | 60.0444  | 60.0444  |          | 42.0338        | 88.0393  |          | 70.0287        | 44.0495  |          | S    |          |          |          |          |          |                | 7 |
| 2 | 86.0964  | 173.1285 |          | 155.1179       | 201.1234 |          | 183.1128       | 145.0972 | 159.1128 | I    | 769.3879 | 782.4083 | 796.4240 | 827.4662 | 810.4396 | 809.4556       | 6 |
| 3 | 101.1073 | 301.2234 | 284.1969 | 283.2129       | 329.2183 | 312.1918 | 311.2078       | 244.1656 |          | K    | 641.2930 | 640.2977 |          | 714.3821 | 697.3556 | 696.3715       | 5 |
| 4 | 120.0808 | 448.2918 | 431.2653 | 430.2813       | 476.2867 | 459.2602 | 458.2762       |          |          | F    | 494.2245 |          |          | 586.2871 | 569.2606 | 568.2766       | 4 |
| 5 | 136.0757 | 611.3552 | 594.3286 | 593.3446       | 639.3501 | 622.3235 | 621.3395       |          |          | Y    | 331.1612 |          |          | 439.2187 | 422.1922 | 421.2082       | 3 |
| 6 | 102.0550 | 740.3978 | 723.3712 | 722.3872       | 768.3927 | 751.3661 | 750.3821       | 682.3923 |          | E    | 202.1186 | 201.1234 |          | 276.1554 | 259.1288 | 258.1448       | 2 |
| 7 | 101.1073 |          |          |                |          |          |                |          |          | K    | 74.0237  | 73.0284  |          | 147.1128 | 130.0863 |                | 1 |

| Seq   | ya       | yb       | Seq | ya       | yb       | Seq  | ya       | yb       |
|-------|----------|----------|-----|----------|----------|------|----------|----------|
| IK    | 214.1914 | 242.1863 | IKF | 361.2598 | 389.2547 | IKFY | 524.3231 | 552.3180 |
| IKFYE | 653.3657 | 681.3606 | KF  | 248.1757 | 276.1707 | KFY  | 411.2391 | 439.2340 |
| KFYE  | 540.2817 | 568.2766 | FY  | 283.1441 | 311.1390 | FYE  | 412.1867 | 440.1816 |
| YE    | 265.1183 | 293.1132 |     |          |          |      |          |          |

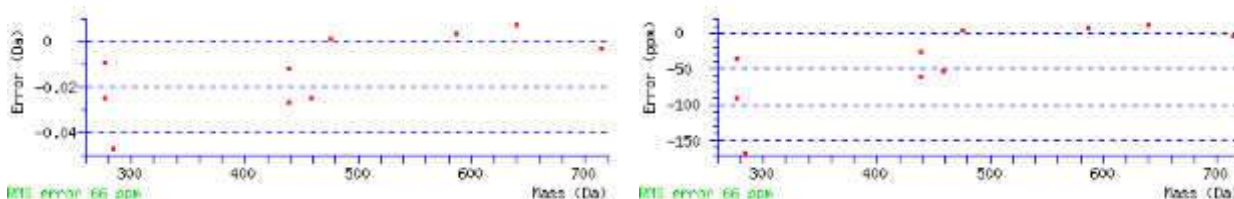

NCBI BLAST search of **SIKFYEK**

(Parameters: blastp, nr protein database, expect=20000, no filter, PAM30)

Other BLAST [web gateways](#)

All matches to this query

| Score | Mr(calc) | Delta   | Sequence                 |
|-------|----------|---------|--------------------------|
| 16.8  | 913.5021 | -0.0255 | <a href="#">KEYISTR</a>  |
| 15.5  | 913.4691 | 0.0075  | <a href="#">LSMKYTR</a>  |
| 14.0  | 913.4658 | 0.0109  | <a href="#">SIFGAYTR</a> |
| 14.0  | 913.4505 | 0.0261  | <a href="#">SSTLSYTR</a> |
| 13.9  | 913.4658 | 0.0109  | <a href="#">ALGSFYTR</a> |
| 13.9  | 913.4658 | 0.0109  | <a href="#">TNIFYTR</a>  |
| 13.0  | 913.4909 | -0.0143 | <a href="#">SIKFYEK</a>  |
| 12.4  | 913.4658 | 0.0109  | <a href="#">SLGAYFTR</a> |
| 12.0  | 913.4658 | 0.0109  | <a href="#">FOYTLSR</a>  |
| 12.0  | 913.4294 | 0.0472  | <a href="#">KEYDDAR</a>  |

Mascot: <http://www.matrixscience.com/>

**MATRIX SCIENCE Mascot Search Results**

**Peptide View Spot no 47**

MS/MS Fragmentation of **ILRQPGPLPGINTK**

Found in **gi162461576** in **NCBI nr**, glyoxylase 1 [Zea mays]

Match to Query 63: 1502.895824 from(1503.903100,1+) intensity(0.0000) index(19)

Title: Label M3, Spot\_Id: 219718, Peak\_List\_Id: 225450, MSMS Job\_Run\_Id: 21779, Comment:

Data file C:\Documents and Settings\Administrator\Desktop\farah BHU\spot set plate\Farah-Garima 11 May 2013\ppw\_M3\_136842147700.txt

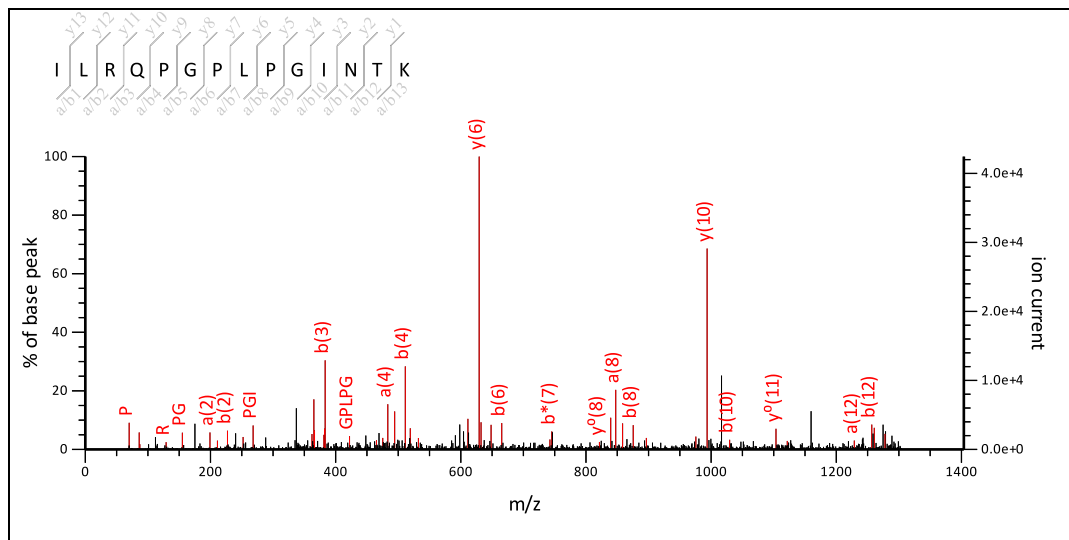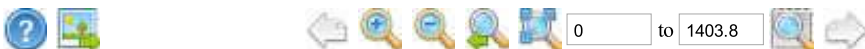

Label all possible matches  Label matches used for scoring

Monoisotopic mass of neutral peptide Mr(calc): 1502.8933

Fixed modifications: Carbamidomethyl (C) (apply to specified residues or termini only)

Ions Score: 55 Expect: 0.0038

Matches : 69/237 fragment ions using 91 most intense peaks [\(help\)](#)

| #  | Immon.   | a         | a*        | a <sup>0</sup> | b         | b*        | b <sup>0</sup> | d         | d'        | Seq. | v         | w         | w'       | y         | y*        |
|----|----------|-----------|-----------|----------------|-----------|-----------|----------------|-----------|-----------|------|-----------|-----------|----------|-----------|-----------|
| 1  | 86.0964  | 86.0964   |           |                | 114.0913  |           |                | 44.0495   |           | I    |           |           |          |           |           |
| 2  | 86.0964  | 199.1805  |           |                | 227.1754  |           |                | 157.1335  |           | L    | 1332.7383 | 1331.7430 |          | 1390.8165 | 1373.7900 |
| 3  | 129.1135 | 355.2816  | 338.2551  |                | 383.2765  | 366.2500  |                | 270.2176  |           | R    | 1176.6372 | 1175.6419 |          | 1277.7324 | 1260.7059 |
| 4  | 101.0709 | 483.3402  | 466.3136  |                | 511.3351  | 494.3085  |                | 426.3187  |           | Q    | 1048.5786 | 1047.5833 |          | 1121.6313 | 1104.6048 |
| 5  | 70.0651  | 580.3929  | 563.3664  |                | 608.3879  | 591.3613  |                | 554.3773  |           | P    | 951.5258  | 950.5306  |          | 993.5728  | 976.5462  |
| 6  | 30.0338  | 637.4144  | 620.3879  |                | 665.4093  | 648.3828  |                |           |           | G    |           |           |          | 896.5200  | 879.4934  |
| 7  | 70.0651  | 734.4672  | 717.4406  |                | 762.4621  | 745.4355  |                | 708.4515  |           | P    | 797.4516  | 796.4563  |          | 839.4985  | 822.4720  |
| 8  | 86.0964  | 847.5512  | 830.5247  |                | 875.5461  | 858.5196  |                | 805.5043  |           | L    | 684.3675  | 683.3723  |          | 742.4458  | 725.4192  |
| 9  | 70.0651  | 944.6040  | 927.5774  |                | 972.5989  | 955.5724  |                | 918.5883  |           | P    | 587.3148  | 586.3195  |          | 629.3617  | 612.3352  |
| 10 | 30.0338  | 1001.6255 | 984.5989  |                | 1029.6204 | 1012.5938 |                |           |           | G    |           |           |          | 532.3089  | 515.2824  |
| 11 | 86.0964  | 1114.7095 | 1097.6830 |                | 1142.7044 | 1125.6779 |                | 1086.6782 | 1100.6939 | I    | 417.2092  | 430.2296  | 444.2453 | 475.2875  | 458.2609  |
| 12 | 87.0553  | 1228.7525 | 1211.7259 |                | 1256.7474 | 1239.7208 |                | 1185.7466 |           | N    | 303.1663  | 302.1710  |          | 362.2034  | 345.1769  |
| 13 | 74.0600  | 1329.8001 | 1312.7736 | 1311.7896      | 1357.7950 | 1340.7685 | 1339.7845      | 1313.8052 | 1315.7845 | T    | 202.1186  | 215.1390  | 217.1183 | 248.1605  | 231.1339  |
| 14 | 101.1073 |           |           |                |           |           |                |           |           | K    | 74.0237   | 73.0284   |          | 147.1128  | 130.0863  |

| Seq     | ya       | yb       | Seq    | ya       | yb       | Seq    | ya       | yb       |
|---------|----------|----------|--------|----------|----------|--------|----------|----------|
| LR      | 242.1975 | 270.1925 | LRQ    | 370.2561 | 398.2510 | LRQP   | 467.3089 | 495.3038 |
| LRQPG   | 524.3303 | 552.3253 | LRQPGP | 621.3831 | 649.3780 | RQ     | 257.1720 | 285.1670 |
| RQP     | 354.2248 | 382.2197 | RQPG   | 411.2463 | 439.2412 | RQPGP  | 508.2990 | 536.2940 |
| RQPGPL  | 621.3831 | 649.3780 | QP     | 198.1237 | 226.1186 | QPG    | 255.1452 | 283.1401 |
| QPGP    | 352.1979 | 380.1928 | QPGPL  | 465.2820 | 493.2769 | QPGPLP | 562.3348 | 590.3297 |
| QPGPLPG | 619.3562 | 647.3511 | PG     | 127.0866 | 155.0815 | PGP    | 224.1394 | 252.1343 |
| PGPL    | 337.2234 | 365.2183 | PGPLP  | 434.2762 | 462.2711 | PGPLPG | 491.2976 | 519.2926 |

|                |          |          |              |          |          |               |          |          |
|----------------|----------|----------|--------------|----------|----------|---------------|----------|----------|
| <b>PGPLPGI</b> | 604.3817 | 632.3766 | <b>GP</b>    | 127.0866 | 155.0815 | <b>GPL</b>    | 240.1707 | 268.1656 |
| <b>GPLP</b>    | 337.2234 | 365.2183 | <b>GPLPG</b> | 394.2449 | 422.2398 | <b>GPLPGI</b> | 507.3289 | 535.3239 |
| <b>GPLPGIN</b> | 621.3719 | 649.3668 | <b>PL</b>    | 183.1492 | 211.1441 | <b>PLP</b>    | 280.2020 | 308.1969 |
| <b>PLPG</b>    | 337.2234 | 365.2183 | <b>PLPGI</b> | 450.3075 | 478.3024 | <b>PLPGIN</b> | 564.3504 | 592.3453 |
| <b>PLPGINT</b> | 665.3981 | 693.3930 | <b>LP</b>    | 183.1492 | 211.1441 | <b>LPG</b>    | 240.1707 | 268.1656 |
| <b>LPGI</b>    | 353.2547 | 381.2496 | <b>LPGIN</b> | 467.2976 | 495.2926 | <b>LPGINT</b> | 568.3453 | 596.3402 |
| <b>PG</b>      | 127.0866 | 155.0815 | <b>PGI</b>   | 240.1707 | 268.1656 | <b>PGIN</b>   | 354.2136 | 382.2085 |
| <b>PGINT</b>   | 455.2613 | 483.2562 | <b>GI</b>    | 143.1179 | 171.1128 | <b>GIN</b>    | 257.1608 | 285.1557 |
| <b>GINT</b>    | 358.2085 | 386.2034 | <b>IN</b>    | 200.1394 | 228.1343 | <b>INT</b>    | 301.1870 | 329.1819 |
| <b>NT</b>      | 188.1030 | 216.0979 |              |          |          |               |          |          |

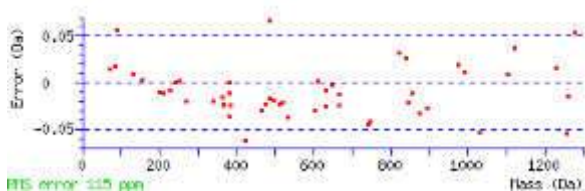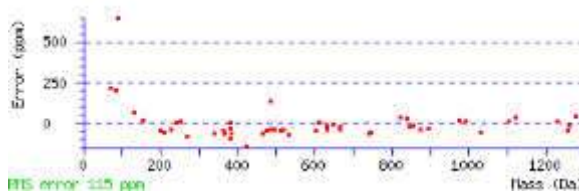

NCBI BLAST search of [ILROPGPLPGINTK](#)

(Parameters: blastp, nr protein database, expect=20000, no filter, PAM30)

Other BLAST [web gateways](#)

#### All matches to this query

| Score | M <sub>r</sub> (calc) | Delta   | Sequence                        |
|-------|-----------------------|---------|---------------------------------|
| 55.1  | 1502.8933             | 0.0025  | <a href="#">ILROPGPLPGINTK</a>  |
| 55.1  | 1502.8933             | 0.0025  | <a href="#">ILROPGPLPGLNTK</a>  |
| 15.9  | 1502.9548             | -0.0590 | <a href="#">LPSILLHTKOILK</a>   |
| 15.1  | 1502.8245             | 0.0713  | <a href="#">GPPLGWIPTPEIAR</a>  |
| 13.4  | 1502.8167             | 0.0791  | <a href="#">LIIDAMGNFSPVVK</a>  |
| 13.4  | 1502.8167             | 0.0791  | <a href="#">LLIDAMGNFSPVVK</a>  |
| 13.3  | 1502.8820             | 0.0138  | <a href="#">LLROAFVESIVTK</a>   |
| 13.1  | 1502.8708             | 0.0250  | <a href="#">ILLPEVIPDEIR</a>    |
| 12.8  | 1502.7702             | 0.1256  | <a href="#">RRPTPEPSSSHPR</a>   |
| 11.4  | 1502.8430             | 0.0528  | <a href="#">APGRAVLOVHGTAAR</a> |

Mascot: <http://www.matrixscience.com/>



# Mascot Search Results

## Peptide View **Spot no 48**

MS/MS Fragmentation of **LLHAVYR**

Found in **gi|115475151** in **NCBI nr**, Os08g0191700 [Oryza sativa Japonica Group]

Match to Query 3: 870.583724 from(871.591000,1+) intensity(0.0000) index(0)

Title: Label: E19, Spot\_Id: 219966, Peak\_List\_Id: 229275, MSMS Job\_Run\_Id: 22016, Comment:

Data file C:\Documents and Settings\Administrator\Desktop\Farah-Garima 11May 2013\ppw\_E19\_136868347200.txt

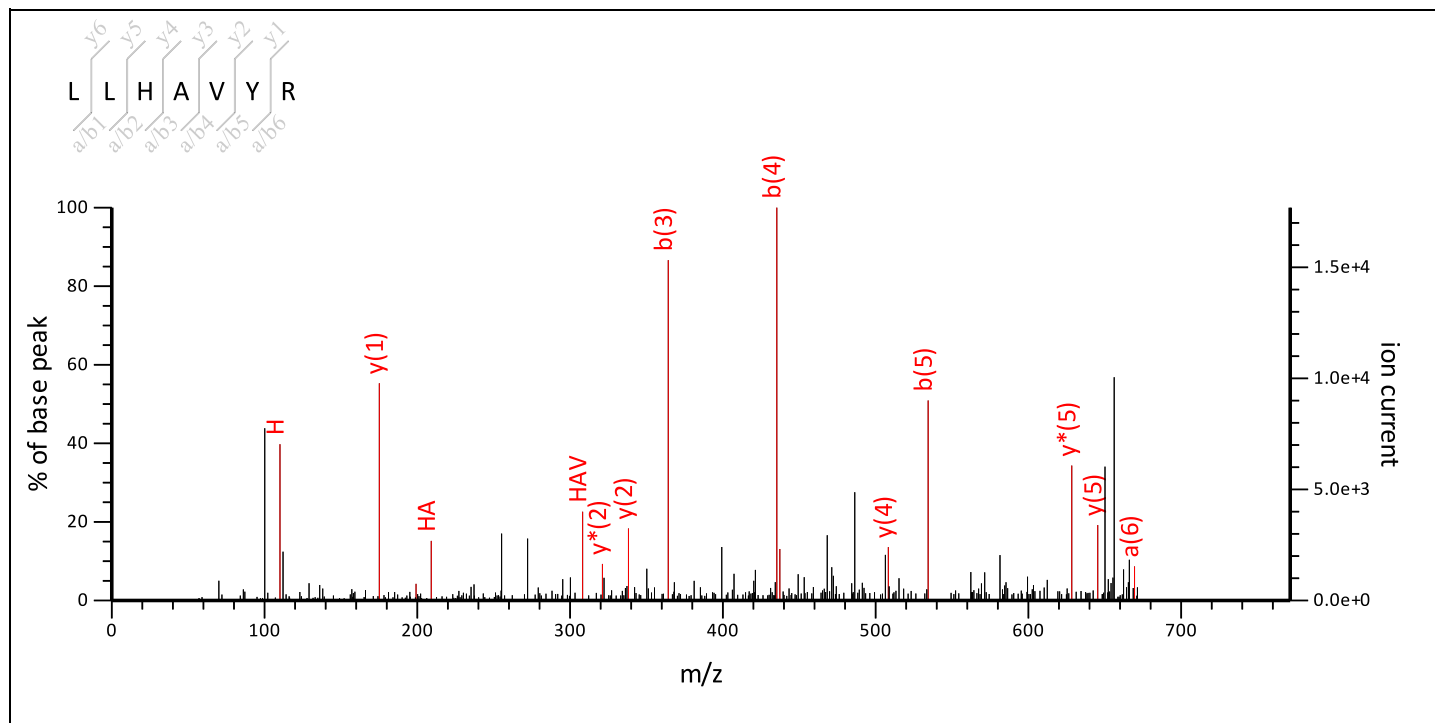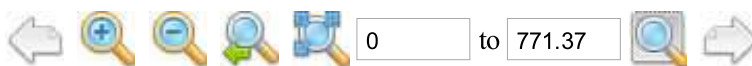

Label all possible matches  Label matches used for scoring

**Monoisotopic mass of neutral peptide Mr(calc):** 870.5076

**Fixed modifications:** Carbamidomethyl (C) (apply to specified residues or termini only)

**Ions Score:** 31 **Expect:** 29

**Matches:** 15/63 fragment ions using 28 most intense peaks ([help](#))

| # | Immon.          | a               | b               | d        | Seq. | v        | w        | y               | y*              | # |
|---|-----------------|-----------------|-----------------|----------|------|----------|----------|-----------------|-----------------|---|
| 1 | 86.0964         | 86.0964         | 114.0913        | 44.0495  | L    |          |          |                 |                 | 7 |
| 2 | 86.0964         | <b>199.1805</b> | 227.1754        | 157.1335 | L    | 700.3525 | 699.3573 | 758.4308        | 741.4042        | 6 |
| 3 | <b>110.0713</b> | 336.2394        | <b>364.2343</b> |          | H    | 563.2936 |          | <b>645.3467</b> | <b>628.3202</b> | 5 |
| 4 | 44.0495         | 407.2765        | <b>435.2714</b> |          | A    | 492.2565 |          | <b>508.2878</b> | 491.2613        | 4 |
| 5 | 72.0808         | 506.3449        | <b>534.3398</b> | 492.3293 | V    | 393.1881 | 406.2085 | <b>437.2507</b> | 420.2241        | 3 |
| 6 | 136.0757        | <b>669.4083</b> | 697.4032        |          | Y    | 230.1248 |          | <b>338.1823</b> | <b>321.1557</b> | 2 |
| 7 | 129.1135        |                 |                 |          | R    | 74.0237  | 73.0284  | <b>175.1190</b> | 158.0924        | 1 |

| Seq | ya | yb | Seq | ya | yb | Seq | ya | yb |
|-----|----|----|-----|----|----|-----|----|----|
|     |    |    |     |    |    |     |    |    |

|              |          |          |            |          |                 |             |          |                 |
|--------------|----------|----------|------------|----------|-----------------|-------------|----------|-----------------|
| <b>LH</b>    | 223.1553 | 251.1503 | <b>LHA</b> | 294.1925 | 322.1874        | <b>LHAV</b> | 393.2609 | 421.2558        |
| <b>LHAVY</b> | 556.3242 | 584.3191 | <b>HA</b>  | 181.1084 | <b>209.1033</b> | <b>HAV</b>  | 280.1768 | <b>308.1717</b> |
| <b>HAVY</b>  | 443.2401 | 471.2350 | <b>AV</b>  | 143.1179 | 171.1128        | <b>AVY</b>  | 306.1812 | 334.1761        |
| <b>VY</b>    | 235.1441 | 263.1390 |            |          |                 |             |          |                 |

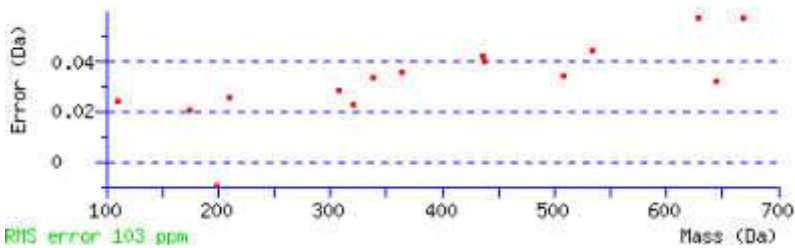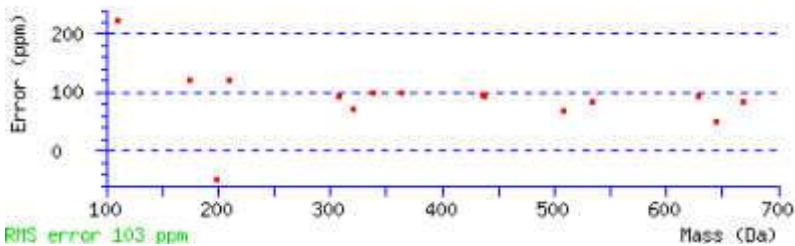

NCBI **BLAST** search of [LLHAVYR](#)

(Parameters: blastp, nr protein database, expect=20000, no filter, PAM30)

Other BLAST [web gateways](#)

#### All matches to this query

| Score | Mr(calc) | Delta  | Sequence                |
|-------|----------|--------|-------------------------|
| 30.6  | 870.5076 | 0.0762 | <a href="#">ILHAVYR</a> |
| 30.6  | 870.5076 | 0.0762 | <a href="#">LLHAVYR</a> |
| 27.0  | 870.5076 | 0.0762 | <a href="#">HVLLAYR</a> |
| 22.9  | 870.5076 | 0.0762 | <a href="#">LLHVAYR</a> |
| 22.8  | 870.5076 | 0.0762 | <a href="#">VHLIAYR</a> |
| 22.7  | 870.5076 | 0.0762 | <a href="#">VHIAIYR</a> |
| 22.6  | 870.5076 | 0.0762 | <a href="#">VHAILYR</a> |
| 22.6  | 870.5076 | 0.0762 | <a href="#">VHALLYR</a> |
| 22.4  | 870.5076 | 0.0761 | <a href="#">VVHVYR</a>  |
| 21.8  | 870.5076 | 0.0762 | <a href="#">VHLLAYR</a> |

Mascot: <http://www.matrixscience.com/>

**MATRIX SCIENCE Mascot Search Results**

**Peptide View Spot no 48**

MS/MS Fragmentation of **VADHAGVALAGLTADGR**

Found in **gi115444057** in **NCBIInr**, Os02g0133800 [Oryza sativa Japonica Group]

Match to Query 159: 1592.901024 from(1593.908300,1+) intensity(0.0000) index(26)

Title: Label: E19, Spot\_Id: 219966, Peak\_List\_Id: 229271, MSMS Job\_Run\_Id: 22016, Comment:

Data file C:\Documents and Settings\Administrator\Desktop\Farah-Garima 11May 2013\ppw\_E19\_136868347200.txt

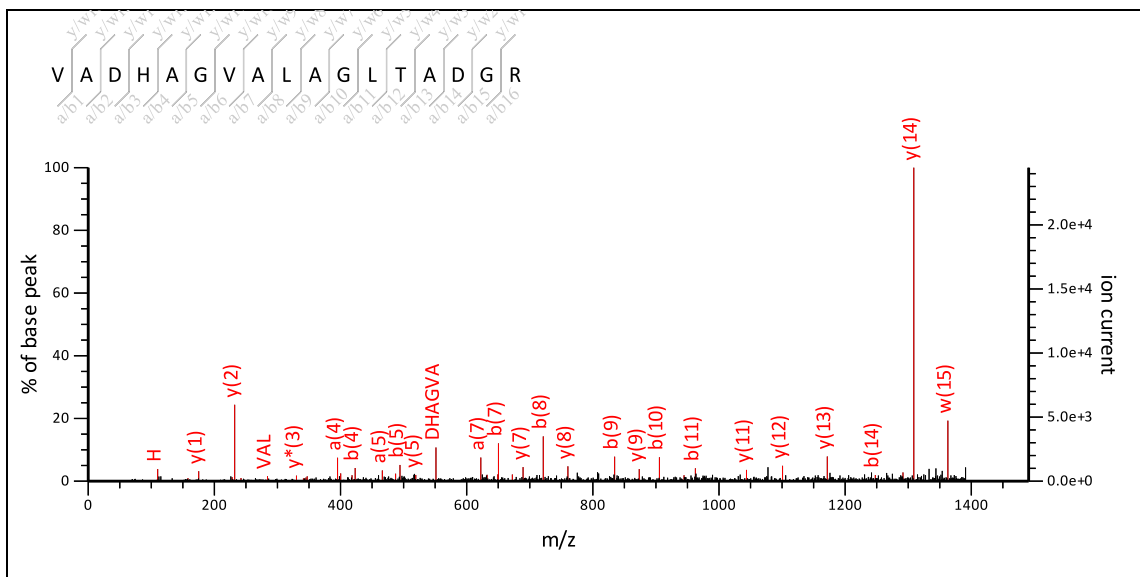

Navigation icons: ? Home Back Forward Search Range: 0 to 1490.9

Label all possible matches  Label matches used for scoring

Monoisotopic mass of neutral peptide **Mr(calc)**: 1592.8271  
**Fixed modifications**: Carbamidomethyl (C) (apply to specified residues or termini only)  
**Ions Score**: 84 **Expect**: 0.00021  
**Matches**: 50/301 fragment ions using 84 most intense peaks ([help](#))

| #  | Immon.   | a         | a <sup>0</sup> | b         | b <sup>0</sup> | d         | d'        | Seq. | v         | w         | w'       | y         | y*        | y <sup>0</sup> | #  |
|----|----------|-----------|----------------|-----------|----------------|-----------|-----------|------|-----------|-----------|----------|-----------|-----------|----------------|----|
| 1  | 72.0808  | 72.0808   |                | 100.0757  |                | 44.0495   |           | V    |           |           |          |           |           |                | 17 |
| 2  | 44.0495  | 143.1179  |                | 171.1128  |                |           |           | A    | 1478.7346 |           |          | 1494.7659 | 1477.7394 | 1476.7554      | 16 |
| 3  | 88.0393  | 258.1448  | 240.1343       | 286.1397  | 268.1292       | 214.1550  |           | D    | 1363.7077 | 1362.7124 |          | 1423.7288 | 1406.7023 | 1405.7183      | 15 |
| 4  | 110.0713 | 395.2037  | 377.1932       | 423.1987  | 405.1881       |           |           | H    | 1226.6488 |           |          | 1308.7019 | 1291.6753 | 1290.6913      | 14 |
| 5  | 44.0495  | 466.2409  | 448.2303       | 494.2358  | 476.2252       |           |           | A    | 1155.6117 |           |          | 1171.6430 | 1154.6164 | 1153.6324      | 13 |
| 6  | 30.0338  | 523.2623  | 505.2518       | 551.2572  | 533.2467       |           |           | G    |           |           |          | 1100.6059 | 1083.5793 | 1082.5953      | 12 |
| 7  | 72.0808  | 622.3307  | 604.3202       | 650.3257  | 632.3151       | 608.3151  |           | V    | 999.5218  | 1012.5422 |          | 1043.5844 | 1026.5578 | 1025.5738      | 11 |
| 8  | 44.0495  | 693.3678  | 675.3573       | 721.3628  | 703.3522       |           |           | A    | 928.4847  |           |          | 944.5160  | 927.4894  | 926.5054       | 10 |
| 9  | 86.0964  | 806.4519  | 788.4413       | 834.4468  | 816.4363       | 764.4050  |           | L    | 815.4006  | 814.4054  |          | 873.4789  | 856.4523  | 855.4683       | 9  |
| 10 | 44.0495  | 877.4890  | 859.4785       | 905.4839  | 887.4734       |           |           | A    | 744.3635  |           |          | 760.3948  | 743.3682  | 742.3842       | 8  |
| 11 | 30.0338  | 934.5105  | 916.4999       | 962.5054  | 944.4948       |           |           | G    |           |           |          | 689.3577  | 672.3311  | 671.3471       | 7  |
| 12 | 86.0964  | 1047.5946 | 1029.5840      | 1075.5895 | 1057.5789      | 1005.5476 |           | L    | 574.2580  | 573.2627  |          | 632.3362  | 615.3097  | 614.3257       | 6  |
| 13 | 74.0600  | 1148.6422 | 1130.6317      | 1176.6372 | 1158.6266      | 1132.6473 | 1134.6266 | T    | 473.2103  | 486.2307  | 488.2100 | 519.2522  | 502.2256  | 501.2416       | 5  |
| 14 | 44.0495  | 1219.6793 | 1201.6688      | 1247.6743 | 1229.6637      |           |           | A    | 402.1732  |           |          | 418.2045  | 401.1779  | 400.1939       | 4  |
| 15 | 88.0393  | 1334.7063 | 1316.6957      | 1362.7012 | 1344.6906      | 1290.7165 |           | D    | 287.1462  | 286.1510  |          | 347.1674  | 330.1408  | 329.1568       | 3  |
| 16 | 30.0338  | 1391.7278 | 1373.7172      | 1419.7227 | 1401.7121      |           |           | G    |           |           |          | 232.1404  | 215.1139  |                | 2  |
| 17 | 129.1135 |           |                |           |                |           |           | R    | 74.0237   | 73.0284   |          | 175.1190  | 158.0924  |                | 1  |

| Seq | ya | yb | Seq | ya | yb | Seq | ya | yb |
|-----|----|----|-----|----|----|-----|----|----|
|     |    |    |     |    |    |     |    |    |



|          |          |          |          |          |          |          |          |          |
|----------|----------|----------|----------|----------|----------|----------|----------|----------|
| AD       | 159.0764 | 187.0713 | ADH      | 296.1353 | 324.1302 | ADHA     | 367.1724 | 395.1674 |
| ADHAG    | 424.1939 | 452.1888 | ADHAGV   | 523.2623 | 551.2572 | ADHAGVA  | 594.2994 | 622.2944 |
| DH       | 225.0982 | 253.0931 | DHA      | 296.1353 | 324.1302 | DHAG     | 353.1568 | 381.1517 |
| DHAGV    | 452.2252 | 480.2201 | DHAGVA   | 523.2623 | 551.2572 | DHAGVAL  | 636.3464 | 664.3413 |
| HA       | 181.1084 | 209.1033 | HAG      | 238.1299 | 266.1248 | HAGV     | 337.1983 | 365.1932 |
| HAGVA    | 408.2354 | 436.2303 | HAGVAL   | 521.3194 | 549.3144 | HAGVALA  | 592.3566 | 620.3515 |
| HAGVALAG | 649.3780 | 677.3729 | AG       | 101.0709 | 129.0659 | AGV      | 200.1394 | 228.1343 |
| AGVA     | 271.1765 | 299.1714 | AGVAL    | 384.2605 | 412.2554 | AGVALA   | 455.2976 | 483.2926 |
| AGVALAG  | 512.3191 | 540.3140 | AGVALAGL | 625.4032 | 653.3981 | GV       | 129.1022 | 157.0972 |
| GVA      | 200.1394 | 228.1343 | GVAL     | 313.2234 | 341.2183 | GVALA    | 384.2605 | 412.2554 |
| GVALAG   | 441.2820 | 469.2769 | GVALAGL  | 554.3661 | 582.3610 | GVALAGLT | 655.4137 | 683.4087 |
| VA       | 143.1179 | 171.1128 | VAL      | 256.2020 | 284.1969 | VALA     | 327.2391 | 355.2340 |
| VALAG    | 384.2605 | 412.2554 | VALAGL   | 497.3446 | 525.3395 | VALAGLT  | 598.3923 | 626.3872 |
| VALAGLTA | 669.4294 | 697.4243 | AL       | 157.1335 | 185.1285 | ALA      | 228.1707 | 256.1656 |
| ALAG     | 285.1921 | 313.1870 | ALAGL    | 398.2762 | 426.2711 | ALAGLT   | 499.3239 | 527.3188 |
| ALAGLTA  | 570.3610 | 598.3559 | ALAGLTAD | 685.3879 | 713.3828 | LA       | 157.1335 | 185.1285 |
| LAG      | 214.1550 | 242.1499 | LAGL     | 327.2391 | 355.2340 | LAGLT    | 428.2867 | 456.2817 |
| LAGLTA   | 499.3239 | 527.3188 | LAGLTAD  | 614.3508 | 642.3457 | LAGLTADG | 671.3723 | 699.3672 |
| AG       | 101.0709 | 129.0659 | AGL      | 214.1550 | 242.1499 | AGLT     | 315.2027 | 343.1976 |
| AGLTA    | 386.2398 | 414.2347 | AGLTAD   | 501.2667 | 529.2617 | AGLTADG  | 558.2882 | 586.2831 |
| GL       | 143.1179 | 171.1128 | GLT      | 244.1656 | 272.1605 | GLTA     | 315.2027 | 343.1976 |
| GLTAD    | 430.2296 | 458.2245 | GLTADG   | 487.2511 | 515.2460 | LT       | 187.1441 | 215.1390 |
| LTA      | 258.1812 | 286.1761 | LTAD     | 373.2082 | 401.2031 | LTADG    | 430.2296 | 458.2245 |
| TA       | 145.0972 | 173.0921 | TAD      | 260.1241 | 288.1190 | TADG     | 317.1456 | 345.1405 |
| AD       | 159.0764 | 187.0713 | ADG      | 216.0979 | 244.0928 | DG       | 145.0608 | 173.0557 |

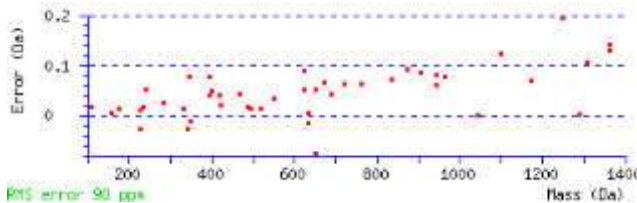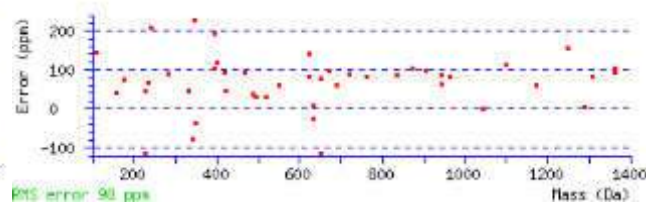

NCBI BLAST search of [VADHAGVALAGLTADGR](#)  
 (Parameters: blastp, nr protein database, expect=20000, no filter, PAM30)  
 Other BLAST [web gateways](#)

All matches to this query

| Score | Mr(calc)  | Delta   | Sequence                           |
|-------|-----------|---------|------------------------------------|
| 83.9  | 1592.8271 | 0.0740  | <a href="#">VADHAGVALAGLTADGR</a>  |
| 33.4  | 1592.8131 | 0.0879  | <a href="#">ARHEGIGIEQRDGR</a>     |
| 27.3  | 1592.7794 | 0.1216  | <a href="#">GYDSAGVATVAAGELGR</a>  |
| 26.5  | 1592.8046 | 0.0964  | <a href="#">GYDSAGVALLDGNTLK</a>   |
| 25.9  | 1592.8423 | 0.0587  | <a href="#">FAFGAGVTAIVGRDGR</a>   |
| 25.8  | 1592.9038 | -0.0028 | <a href="#">GFKFAGIAGDKNKK</a>     |
| 24.0  | 1592.8383 | 0.0628  | <a href="#">REHOAALVKQEER</a>      |
| 24.0  | 1592.8385 | 0.0626  | <a href="#">ACVYGVAAILWATAK</a>    |
| 23.8  | 1592.8674 | 0.0336  | <a href="#">AFLTGAAGALAAAAAYVR</a> |
| 22.9  | 1592.8133 | 0.0877  | <a href="#">MKFALNIVDWQGR</a>      |

Mascot: <http://www.matrixscience.com/>


**Mascot Search Results**
**Peptide View Spot no 48**

 MS/MS Fragmentation of **NQYD'TDVT'WSPAGR**

 Found in **gi|115444057** in **NCBI nr**, Os02g0133800 [Oryza sativa Japonica Group]

Match to Query 172: 1709.843224 from(1710.850500,1+) intensity(0.0000) index(30)

Title: Label: E19, Spot\_Id: 219966, Peak\_List\_Id: 229270, MSMS Job\_Run\_Id: 22016, Comment:

Data file C:\Documents and Settings\Administrator\Desktop\Farah-Garima 11May 2013\ppw\_E19\_136868347200.txt

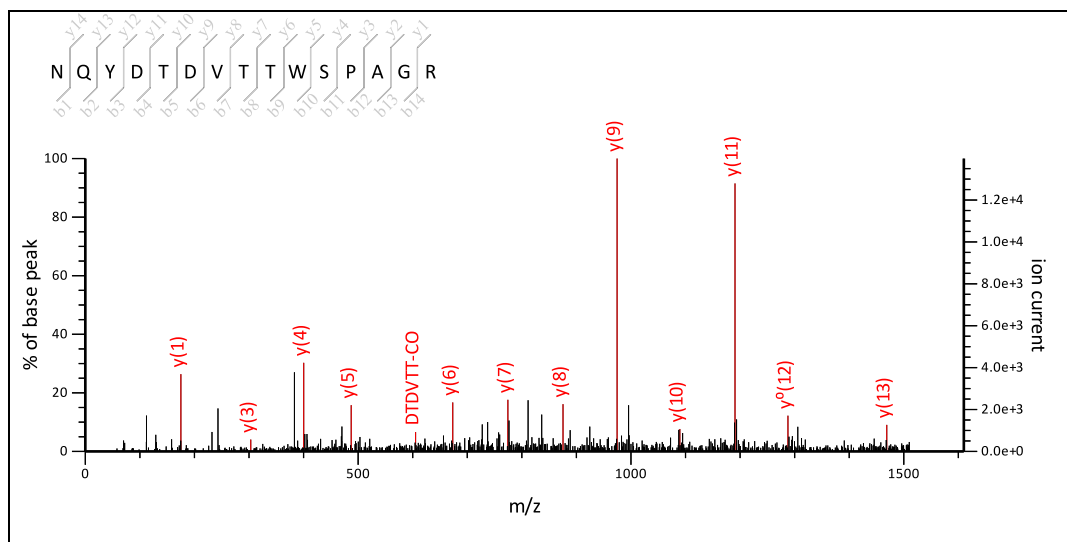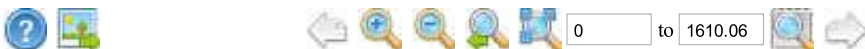
 Label all possible matches  Label matches used for scoring 

Monoisotopic mass of neutral peptide Mr(calc): 1709.7645

Fixed modifications: Carbamidomethyl (C) (apply to specified residues or termini only)

Ions Score: 108 Expect: 7.6e-07

 Matches : 16/269 fragment ions using 15 most intense peaks ([help](#))

| #  | Immon.   | a         | a*        | a <sup>0</sup> | b         | b*        | b <sup>0</sup> | d         | d'       | Seq. | v         | w         | w'        | y         | y*        |
|----|----------|-----------|-----------|----------------|-----------|-----------|----------------|-----------|----------|------|-----------|-----------|-----------|-----------|-----------|
| 1  | 87.0553  | 87.0553   | 70.0287   |                | 115.0502  | 98.0237   |                | 44.0495   |          | N    |           |           |           |           |           |
| 2  | 101.0709 | 215.1139  | 198.0873  |                | 243.1088  | 226.0822  |                | 158.0924  |          | Q    | 1523.6761 | 1522.6809 |           | 1596.7289 | 1579.7023 |
| 3  | 136.0757 | 378.1772  | 361.1506  |                | 406.1721  | 389.1456  |                |           |          | Y    | 1360.6128 |           |           | 1468.6703 | 1451.6438 |
| 4  | 88.0393  | 493.2041  | 476.1776  | 475.1936       | 521.1991  | 504.1725  | 503.1885       | 449.2143  |          | D    | 1245.5858 | 1244.5906 |           | 1305.6070 | 1288.5804 |
| 5  | 74.0600  | 594.2518  | 577.2253  | 576.2413       | 622.2467  | 605.2202  | 604.2362       | 578.2569  | 580.2362 | T    | 1144.5382 | 1157.5586 | 1159.5378 | 1190.5800 | 1173.5535 |
| 6  | 88.0393  | 709.2788  | 692.2522  | 691.2682       | 737.2737  | 720.2471  | 719.2631       | 665.2889  |          | D    | 1029.5112 | 1028.5160 |           | 1089.5323 | 1072.5058 |
| 7  | 72.0808  | 808.3472  | 791.3206  | 790.3366       | 836.3421  | 819.3155  | 818.3315       | 794.3315  |          | V    | 930.4428  | 943.4632  |           | 974.5054  | 957.4789  |
| 8  | 74.0600  | 909.3949  | 892.3683  | 891.3843       | 937.3898  | 920.3632  | 919.3792       | 893.3999  | 895.3792 | T    | 829.3951  | 842.4155  | 844.3948  | 875.4370  | 858.4104  |
| 9  | 74.0600  | 1010.4425 | 993.4160  | 992.4320       | 1038.4374 | 1021.4109 | 1020.4269      | 994.4476  | 996.4269 | T    | 728.3474  | 741.3678  | 743.3471  | 774.3893  | 757.3628  |
| 10 | 159.0917 | 1196.5218 | 1179.4953 | 1178.5113      | 1224.5168 | 1207.4902 | 1206.5062      |           |          | W    | 542.2681  |           |           | 673.3416  | 656.3151  |
| 11 | 60.0444  | 1283.5539 | 1266.5273 | 1265.5433      | 1311.5488 | 1294.5222 | 1293.5382      | 1267.5590 |          | S    | 455.2361  | 454.2409  |           | 487.2623  | 470.2358  |
| 12 | 70.0651  | 1380.6066 | 1363.5801 | 1362.5961      | 1408.6016 | 1391.5750 | 1390.5910      | 1354.5910 |          | P    | 358.1833  | 357.1881  |           | 400.2303  | 383.2037  |
| 13 | 44.0495  | 1451.6438 | 1434.6172 | 1433.6332      | 1479.6387 | 1462.6121 | 1461.6281      |           |          | A    | 287.1462  |           |           | 303.1775  | 286.1510  |
| 14 | 30.0338  | 1508.6652 | 1491.6387 | 1490.6546      | 1536.6601 | 1519.6336 | 1518.6496      |           |          | G    |           |           |           | 232.1404  | 215.1139  |
| 15 | 129.1135 |           |           |                |           |           |                |           |          | R    | 74.0237   | 73.0284   |           | 175.1190  | 158.0924  |

| Seq   | ya       | yb       | Seq    | ya       | yb       | Seq     | ya       | yb       |
|-------|----------|----------|--------|----------|----------|---------|----------|----------|
| QY    | 264.1343 | 292.1292 | QYD    | 379.1612 | 407.1561 | QYDT    | 480.2089 | 508.2038 |
| QYD   | 595.2358 | 623.2307 | QYD'TD | 694.3042 | 722.2992 | YD      | 251.1026 | 279.0975 |
| YD    | 352.1503 | 380.1452 | YD'TD  | 467.1773 | 495.1722 | YD'TDV  | 566.2457 | 594.2406 |
| YD'TD | 667.2933 | 695.2883 | DT     | 189.0870 | 217.0819 | DTD     | 304.1139 | 332.1088 |
| DTD   | 403.1823 | 431.1773 | DTD'TD | 504.2300 | 532.2249 | DTD'TDT | 605.2777 | 633.2726 |
| TD    | 189.0870 | 217.0819 | TDV    | 288.1554 | 316.1503 | TDV'TD  | 389.2031 | 417.1980 |

|               |          |          |               |          |          |                |          |          |
|---------------|----------|----------|---------------|----------|----------|----------------|----------|----------|
| <b>TDVTT</b>  | 490.2508 | 518.2457 | <b>TDVTTW</b> | 676.3301 | 704.3250 | <b>DV</b>      | 187.1077 | 215.1026 |
| <b>DVT</b>    | 288.1554 | 316.1503 | <b>DVTT</b>   | 389.2031 | 417.1980 | <b>DVTTW</b>   | 575.2824 | 603.2773 |
| <b>DVTTWS</b> | 662.3144 | 690.3093 | <b>VT</b>     | 173.1285 | 201.1234 | <b>VTT</b>     | 274.1761 | 302.1710 |
| <b>VTTW</b>   | 460.2554 | 488.2504 | <b>VTTWS</b>  | 547.2875 | 575.2824 | <b>VTTWSP</b>  | 644.3402 | 672.3352 |
| <b>TT</b>     | 175.1077 | 203.1026 | <b>TTW</b>    | 361.1870 | 389.1819 | <b>TTWS</b>    | 448.2191 | 476.2140 |
| <b>TTWSP</b>  | 545.2718 | 573.2667 | <b>TTWSPA</b> | 616.3089 | 644.3039 | <b>TTWSPAG</b> | 673.3304 | 701.3253 |
| <b>TW</b>     | 260.1394 | 288.1343 | <b>TWS</b>    | 347.1714 | 375.1663 | <b>TWSP</b>    | 444.2241 | 472.2191 |
| <b>TWSPA</b>  | 515.2613 | 543.2562 | <b>TWSPAG</b> | 572.2827 | 600.2776 | <b>WS</b>      | 246.1237 | 274.1186 |
| <b>WSP</b>    | 343.1765 | 371.1714 | <b>WSPA</b>   | 414.2136 | 442.2085 | <b>WSPAG</b>   | 471.2350 | 499.2300 |
| <b>SP</b>     | 157.0972 | 185.0921 | <b>SPA</b>    | 228.1343 | 256.1292 | <b>SPAG</b>    | 285.1557 | 313.1506 |
| <b>PA</b>     | 141.1022 | 169.0972 | <b>PAG</b>    | 198.1237 | 226.1186 | <b>AG</b>      | 101.0709 | 129.0659 |

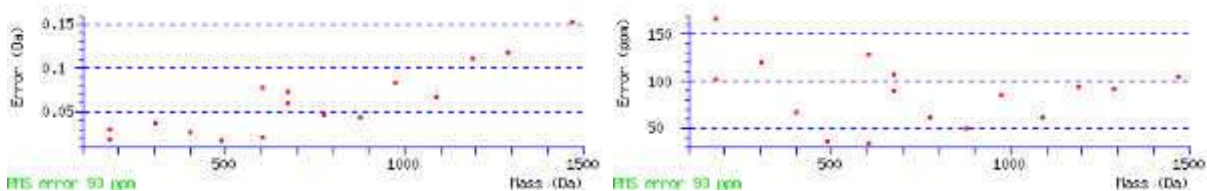

NCBI **BLAST** search of [NOYDTDVTTWSPAGR](#)

(Parameters: blastp, nr protein database, expect=20000, no filter, PAM30)

Other BLAST [web gateways](#)

#### All matches to this query

| Score | Mr(calc)  | Delta   | Sequence                         |
|-------|-----------|---------|----------------------------------|
| 108.4 | 1709.7645 | 0.0787  | <a href="#">NOYDTDVTTWSPAGR</a>  |
| 36.2  | 1709.8883 | -0.0450 | <a href="#">HKDKLDMVOESPKR</a>   |
| 34.9  | 1709.8809 | -0.0377 | <a href="#">IHNGVTDVTRNETVR</a>  |
| 25.2  | 1709.8948 | -0.0516 | <a href="#">KPVVPSEEEIEGDKR</a>  |
| 22.1  | 1709.7719 | 0.0713  | <a href="#">EFMPTFPALNEQDR</a>   |
| 22.0  | 1709.8948 | -0.0516 | <a href="#">LNVPEPVTVIGDTNR</a>  |
| 21.7  | 1709.8559 | -0.0127 | <a href="#">KATVSIKSMVDWVNR</a>  |
| 21.7  | 1709.9536 | -0.1104 | <a href="#">LAKNLOPARATASVDR</a> |
| 21.6  | 1709.8566 | -0.0134 | <a href="#">HKMGAPMNRGKSPGAR</a> |
| 21.4  | 1709.8696 | -0.0264 | <a href="#">LEPLAGRAEAAEAEQR</a> |

Mascot: <http://www.matrixscience.com/>

**MATRIX SCIENCE Mascot Search Results**

**Peptide View Spot no 48**

MS/MS Fragmentation of **SECINHAFVYDAPLPVSR**

Found in **gi|115444057** in **NCBI nr**, Os02g0133800 [Oryza sativa Japonica Group]

Match to Query 186: 2074.099124 from(2075.106400,1+) intensity(0.0000) index(32)

Title: Label: E19, Spot\_Id: 219966, Peak\_List\_Id: 229273, MSMS Job\_Run\_Id: 22016, Comment:

Data file C:\Documents and Settings\Administrator\Desktop\Farah-Garima 11May 2013\ppw\_E19\_136868347200.txt

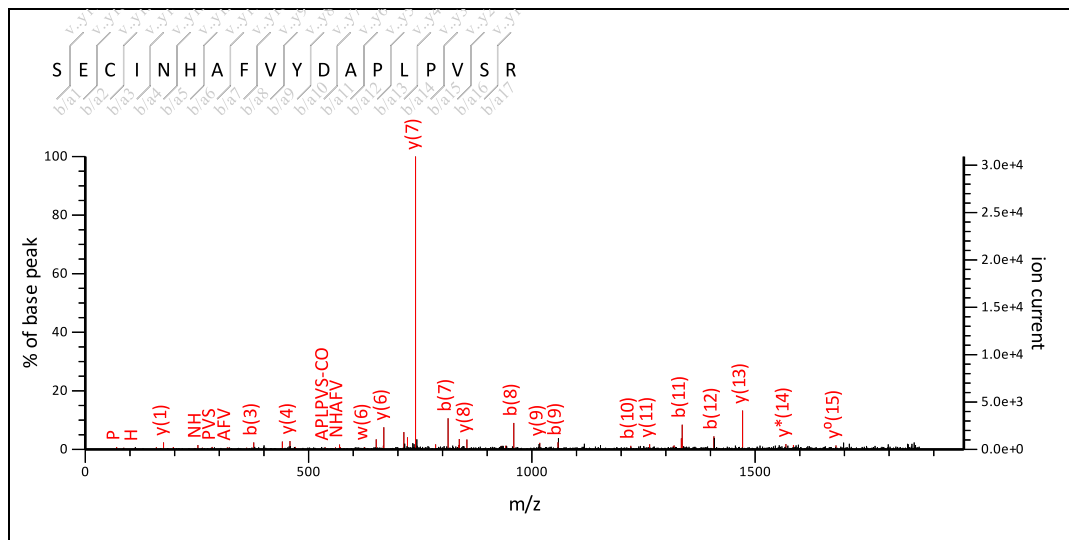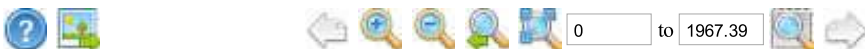

Label all possible matches  Label matches used for scoring

Monoisotopic mass of neutral peptide Mr(calc): 2073.9942

Fixed modifications: Carbamidomethyl (C) (apply to specified residues or termini only)

Ions Score: 74 Expect: 0.0022

Matches : 57/330 fragment ions using 90 most intense peaks [\(help\)](#)

| #  | Immon.   | a         | a*        | a <sup>0</sup> | b         | b*        | b <sup>0</sup> | d         | d'       | Seq. | v         | w         | w'        | y         | y*        |
|----|----------|-----------|-----------|----------------|-----------|-----------|----------------|-----------|----------|------|-----------|-----------|-----------|-----------|-----------|
| 1  | 60.0444  | 60.0444   |           | 42.0338        | 88.0393   |           | 70.0287        | 44.0495   |          | S    |           |           |           |           |           |
| 2  | 102.0550 | 189.0870  |           | 171.0764       | 217.0819  |           | 199.0713       | 131.0815  |          | E    | 1913.9327 | 1912.9374 |           | 1987.9695 | 1970.9429 |
| 3  | 133.0430 | 349.1176  |           | 331.1071       | 377.1125  |           | 359.1020       | 260.1241  |          | C    | 1753.9020 | 1752.9068 |           | 1858.9269 | 1841.9003 |
| 4  | 86.0964  | 462.2017  |           | 444.1911       | 490.1966  |           | 472.1860       | 434.1704  | 448.1860 | I    | 1640.8180 | 1653.8384 | 1667.8540 | 1698.8962 | 1681.8697 |
| 5  | 87.0553  | 576.2446  | 559.2181  | 558.2341       | 604.2395  | 587.2130  | 586.2290       | 533.2388  |          | N    | 1526.7750 | 1525.7798 |           | 1585.8122 | 1568.7856 |
| 6  | 110.0713 | 713.3035  | 696.2770  | 695.2930       | 741.2984  | 724.2719  | 723.2879       |           |          | H    | 1389.7161 |           |           | 1471.7692 | 1454.7427 |
| 7  | 44.0495  | 784.3406  | 767.3141  | 766.3301       | 812.3356  | 795.3090  | 794.3250       |           |          | A    | 1318.6790 |           |           | 1334.7103 | 1317.6838 |
| 8  | 120.0808 | 931.4091  | 914.3825  | 913.3985       | 959.4040  | 942.3774  | 941.3934       |           |          | F    | 1171.6106 |           |           | 1263.6732 | 1246.6467 |
| 9  | 72.0808  | 1030.4775 | 1013.4509 | 1012.4669      | 1058.4724 | 1041.4458 | 1040.4618      | 1016.4618 |          | V    | 1072.5422 | 1085.5626 |           | 1116.6048 | 1099.5782 |
| 10 | 136.0757 | 1193.5408 | 1176.5143 | 1175.5302      | 1221.5357 | 1204.5092 | 1203.5252      |           |          | Y    | 909.4789  |           |           | 1017.5364 | 1000.5098 |
| 11 | 88.0393  | 1308.5677 | 1291.5412 | 1290.5572      | 1336.5627 | 1319.5361 | 1318.5521      | 1264.5779 |          | D    | 794.4519  | 793.4567  |           | 854.4730  | 837.4465  |
| 12 | 44.0495  | 1379.6049 | 1362.5783 | 1361.5943      | 1407.5998 | 1390.5732 | 1389.5892      |           |          | A    | 723.4148  |           |           | 739.4461  | 722.4196  |
| 13 | 70.0651  | 1476.6576 | 1459.6311 | 1458.6471      | 1504.6525 | 1487.6260 | 1486.6420      | 1450.6420 |          | P    | 626.3620  | 625.3668  |           | 668.4090  | 651.3824  |
| 14 | 86.0964  | 1589.7417 | 1572.7151 | 1571.7311      | 1617.7366 | 1600.7101 | 1599.7260      | 1547.6947 |          | L    | 513.2780  | 512.2827  |           | 571.3562  | 554.3297  |
| 15 | 70.0651  | 1686.7945 | 1669.7679 | 1668.7839      | 1714.7894 | 1697.7628 | 1696.7788      | 1660.7788 |          | P    | 416.2252  | 415.2300  |           | 458.2722  | 441.2456  |
| 16 | 72.0808  | 1785.8629 | 1768.8363 | 1767.8523      | 1813.8578 | 1796.8312 | 1795.8472      | 1771.8472 |          | V    | 317.1568  | 330.1772  |           | 361.2194  | 344.1928  |
| 17 | 60.0444  | 1872.8949 | 1855.8683 | 1854.8843      | 1900.8898 | 1883.8633 | 1882.8792      | 1856.9000 |          | S    | 230.1248  | 229.1295  |           | 262.1510  | 245.1244  |
| 18 | 129.1135 |           |           |                |           |           |                |           |          | R    | 74.0237   | 73.0284   |           | 175.1190  | 158.0924  |

| Seq   | ya       | yb       | Seq    | ya       | yb       | Seq   | ya       | yb       |
|-------|----------|----------|--------|----------|----------|-------|----------|----------|
| EC    | 262.0856 | 290.0805 | ECI    | 375.1697 | 403.1646 | ECIN  | 489.2126 | 517.2075 |
| ECINH | 626.2715 | 654.2664 | ECINHA | 697.3086 | 725.3035 | CI    | 246.1271 | 274.1220 |
| CIN   | 360.1700 | 388.1649 | CINH   | 497.2289 | 525.2238 | CINHA | 568.2660 | 596.2609 |

|        |          |          |        |          |          |         |          |          |
|--------|----------|----------|--------|----------|----------|---------|----------|----------|
| IN     | 200.1394 | 228.1343 | INH    | 337.1983 | 365.1932 | INHA    | 408.2354 | 436.2303 |
| INHAF  | 555.3038 | 583.2987 | INHAFV | 654.3722 | 682.3671 | NH      | 224.1142 | 252.1091 |
| NHA    | 295.1513 | 323.1462 | NHAF   | 442.2197 | 470.2146 | NHAFV   | 541.2881 | 569.2831 |
| HA     | 181.1084 | 209.1033 | HAF    | 328.1768 | 356.1717 | HAFV    | 427.2452 | 455.2401 |
| HAFVY  | 590.3085 | 618.3035 | AF     | 191.1179 | 219.1128 | AFV     | 290.1863 | 318.1812 |
| AFVY   | 453.2496 | 481.2445 | AFVYD  | 568.2766 | 596.2715 | AFVYDA  | 639.3137 | 667.3086 |
| FV     | 219.1492 | 247.1441 | FVY    | 382.2125 | 410.2074 | FVYD    | 497.2395 | 525.2344 |
| FVYDA  | 568.2766 | 596.2715 | FVYDAP | 665.3293 | 693.3243 | VY      | 235.1441 | 263.1390 |
| VYD    | 350.1710 | 378.1660 | VYDA   | 421.2082 | 449.2031 | VYDAP   | 518.2609 | 546.2558 |
| VYDAPL | 631.3450 | 659.3399 | YD     | 251.1026 | 279.0975 | YDA     | 322.1397 | 350.1347 |
| YDAP   | 419.1925 | 447.1874 | YDAPL  | 532.2766 | 560.2715 | YDAPLP  | 629.3293 | 657.3243 |
| DA     | 159.0764 | 187.0713 | DAP    | 256.1292 | 284.1241 | DAPL    | 369.2132 | 397.2082 |
| DAPLP  | 466.2660 | 494.2609 | DAPLPV | 565.3344 | 593.3293 | DAPLPVS | 652.3665 | 680.3614 |
| AP     | 141.1022 | 169.0972 | APL    | 254.1863 | 282.1812 | APLP    | 351.2391 | 379.2340 |
| APLPV  | 450.3075 | 478.3024 | APLPVS | 537.3395 | 565.3344 | PL      | 183.1492 | 211.1441 |
| PLP    | 280.2020 | 308.1969 | PLPV   | 379.2704 | 407.2653 | PLPVS   | 466.3024 | 494.2973 |
| LP     | 183.1492 | 211.1441 | LPV    | 282.2176 | 310.2125 | LPVS    | 369.2496 | 397.2445 |
| PV     | 169.1335 | 197.1285 | PVS    | 256.1656 | 284.1605 | VS      | 159.1128 | 187.1077 |

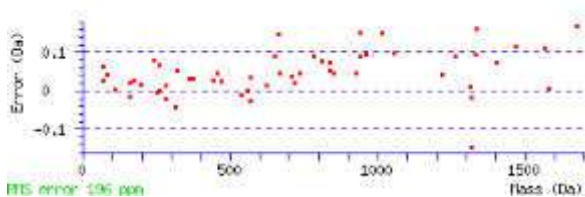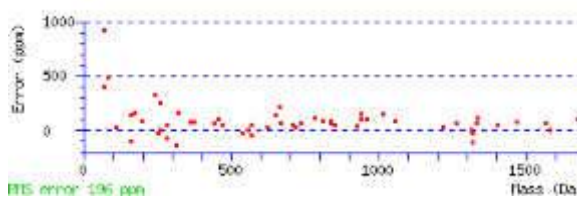

NCBI BLAST search of [SECINHAFAFYDAPLPVSR](#)

(Parameters: blastp, nr protein database, expect=20000, no filter, PAM30)

Other BLAST [web gateways](#)

#### All matches to this query

| Score | Mr(calc)  | Delta   | Sequence                             |
|-------|-----------|---------|--------------------------------------|
| 74.3  | 2073.9942 | 0.1049  | <a href="#">SECINHAFAFYDAPLPVSR</a>  |
| 28.2  | 2074.1106 | -0.0114 | <a href="#">METTYGLVLRAGVSIHR</a>    |
| 20.0  | 2074.1833 | -0.0842 | <a href="#">KVGGGRIAHEIMIGIPAIR</a>  |
| 20.0  | 2074.1833 | -0.0842 | <a href="#">KVGGGRIAHEIMLGIPAIR</a>  |
| 17.5  | 2074.1833 | -0.0842 | <a href="#">KIGGGRVAAHEIMIAVPAIR</a> |
| 17.5  | 2074.1833 | -0.0842 | <a href="#">KIGGGRVAAHEIMLAVPAIR</a> |
| 16.7  | 2074.1826 | -0.0835 | <a href="#">LSIVAALAPVEKAFFVYVR</a>  |
| 15.7  | 2074.1946 | -0.0954 | <a href="#">MGHDKVADKLAPLRRVR</a>    |
| 15.3  | 2074.1833 | -0.0842 | <a href="#">KGIRVNALCPGVNTPLLR</a>   |
| 15.3  | 2074.1535 | -0.0543 | <a href="#">ENLLRLVNPTLSGPEIPGR</a>  |

Mascot: <http://www.matrixscience.com/>

**MATRIX SCIENCE Mascot Search Results**

**Peptide View Spot no 49**

**MS/MS Fragmentation of FSPIKESIVSR**

Found in **gi27261025** in **NCBI nr**, putative thiamine biosynthesis protein [Oryza sativa Japonica Group]

Match to Query 25: 1261.788524 from(1262.795800,1+) intensity(0.0000) index(11)  
 Title: Label: H9, Spot\_Id: 228977, Peak\_List\_Id: 257861, MSMS Job\_Run\_Id: 24940, Comment:  
 Data file ppw\_H9\_138985153400.txt

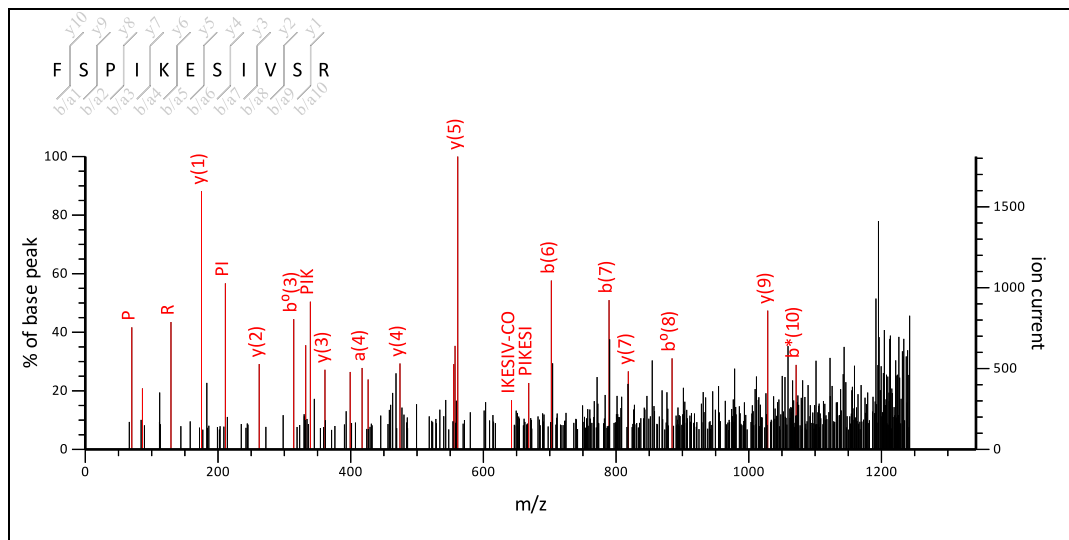

Navigation icons: Home, Back, Forward, Search, Zoom In, Zoom Out, Full Screen, Print. Search range: 0 to 1342.47

Label all possible matches  Label matches used for scoring

Monoisotopic mass of neutral peptide Mr(calc): 1261.7030  
 Fixed modifications: Carbamidomethyl (C) (apply to specified residues or termini only)  
 Ions Score: 33 Expect: 0.52  
 Matches : 30/184 fragment ions using 48 most intense peaks ([help](#))

| #  | Immon.   | a         | a*        | a <sup>0</sup> | b         | b*        | b <sup>0</sup> | d         | d'       | Seq. | v         | w         | w'       | y         | y*        |
|----|----------|-----------|-----------|----------------|-----------|-----------|----------------|-----------|----------|------|-----------|-----------|----------|-----------|-----------|
| 1  | 120.0808 | 120.0808  |           |                | 148.0757  |           |                | 44.0495   |          | F    |           |           |          |           |           |
| 2  | 60.0444  | 207.1128  |           | 189.1022       | 235.1077  |           | 217.0972       | 191.1179  |          | S    | 1083.6157 | 1082.6204 |          | 1115.6419 | 1098.6153 |
| 3  | 70.0651  | 304.1656  |           | 286.1550       | 332.1605  |           | 314.1499       | 278.1499  |          | P    | 986.5629  | 985.5677  |          | 1028.6099 | 1011.5833 |
| 4  | 86.0964  | 417.2496  |           | 399.2391       | 445.2445  |           | 427.2340       | 389.2183  | 403.2340 | I    | 873.4789  | 886.4993  | 900.5149 | 931.5571  | 914.5306  |
| 5  | 101.1073 | 545.3446  | 528.3180  | 527.3340       | 573.3395  | 556.3130  | 555.3289       | 488.2867  |          | K    | 745.3839  | 744.3886  |          | 818.4730  | 801.4465  |
| 6  | 102.0550 | 674.3872  | 657.3606  | 656.3766       | 702.3821  | 685.3556  | 684.3715       | 616.3817  |          | E    | 616.3413  | 615.3461  |          | 690.3781  | 673.3515  |
| 7  | 60.0444  | 761.4192  | 744.3927  | 743.4086       | 789.4141  | 772.3876  | 771.4036       | 745.4243  |          | S    | 529.3093  | 528.3140  |          | 561.3355  | 544.3089  |
| 8  | 86.0964  | 874.5033  | 857.4767  | 856.4927       | 902.4982  | 885.4716  | 884.4876       | 846.4720  | 860.4876 | I    | 416.2252  | 429.2456  | 443.2613 | 474.3035  | 457.2769  |
| 9  | 72.0808  | 973.5717  | 956.5451  | 955.5611       | 1001.5666 | 984.5401  | 983.5560       | 959.5560  |          | V    | 317.1568  | 330.1772  |          | 361.2194  | 344.1928  |
| 10 | 60.0444  | 1060.6037 | 1043.5772 | 1042.5932      | 1088.5986 | 1071.5721 | 1070.5881      | 1044.6088 |          | S    | 230.1248  | 229.1295  |          | 262.1510  | 245.1244  |
| 11 | 129.1135 |           |           |                |           |           |                |           |          | R    | 74.0237   | 73.0284   |          | 175.1190  | 158.0924  |

| Seq    | ya       | yb       | Seq    | ya       | yb       | Seq    | ya       | yb       |
|--------|----------|----------|--------|----------|----------|--------|----------|----------|
| SP     | 157.0972 | 185.0921 | SPI    | 270.1812 | 298.1761 | SPIK   | 398.2762 | 426.2711 |
| SPIKE  | 527.3188 | 555.3137 | SPIKES | 614.3508 | 642.3457 | PI     | 183.1492 | 211.1441 |
| PIK    | 311.2442 | 339.2391 | PIKE   | 440.2867 | 468.2817 | PIKES  | 527.3188 | 555.3137 |
| PIKESI | 640.4028 | 668.3978 | IK     | 214.1914 | 242.1863 | IKE    | 343.2340 | 371.2289 |
| IKES   | 430.2660 | 458.2609 | IKESI  | 543.3501 | 571.3450 | IKESIV | 642.4185 | 670.4134 |
| KE     | 230.1499 | 258.1448 | KES    | 317.1819 | 345.1769 | KESI   | 430.2660 | 458.2609 |
| KESIV  | 529.3344 | 557.3293 | KESIVS | 616.3665 | 644.3614 | ES     | 189.0870 | 217.0819 |
| ESI    | 302.1710 | 330.1660 | ESIV   | 401.2395 | 429.2344 | ESIVS  | 488.2715 | 516.2664 |
| SI     | 173.1285 | 201.1234 | SIV    | 272.1969 | 300.1918 | SIVS   | 359.2289 | 387.2238 |



|    |          |          |     |          |          |    |          |          |
|----|----------|----------|-----|----------|----------|----|----------|----------|
| IV | 185.1648 | 213.1598 | IVS | 272.1969 | 300.1918 | VS | 159.1128 | 187.1077 |
|----|----------|----------|-----|----------|----------|----|----------|----------|

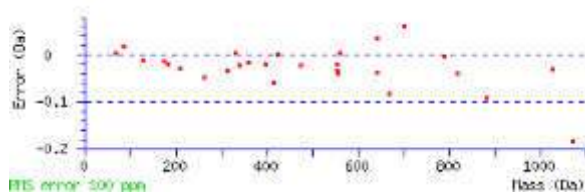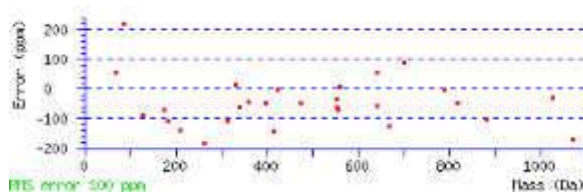

NCBI BLAST search of [FSPIKESIVSR](#)

(Parameters: blastp, nr protein database, expect=20000, no filter, PAM30)

Other BLAST [web gateways](#)

#### All matches to this query

| Score | Mr(calc)  | Delta  | Sequence                     |
|-------|-----------|--------|------------------------------|
| 33.1  | 1261.7030 | 0.0855 | <a href="#">FSPIKESIVSR</a>  |
| 14.9  | 1261.6666 | 0.1219 | <a href="#">ALAFASIPETSR</a> |
| 10.1  | 1261.7030 | 0.0855 | <a href="#">LYNPTLSIVSR</a>  |
| 8.7   | 1261.6779 | 0.1107 | <a href="#">GRLFVESLEGR</a>  |
| 8.6   | 1261.6813 | 0.1073 | <a href="#">MSVIVRTEVGR</a>  |
| 8.3   | 1261.6853 | 0.1033 | <a href="#">YRPGSPMLLTK</a>  |
| 8.2   | 1261.7030 | 0.0855 | <a href="#">AKELFSLLEGR</a>  |
| 8.2   | 1261.6626 | 0.1259 | <a href="#">ONSGSSVTITLR</a> |
| 8.0   | 1261.6666 | 0.1219 | <a href="#">AFSSSPIVGEIR</a> |
| 7.7   | 1261.6779 | 0.1107 | <a href="#">AALHDLQLER</a>   |

Mascot: <http://www.matrixscience.com>




**Mascot Search Results**
**Peptide View Spot no 49**
**MS/MS Fragmentation of LFNAVAVEDLIVKEGR**

 Found in **gi27261025** in **NCBIInr**, putative thiamine biosynthesis protein [Oryza sativa Japonica Group]

Match to Query 28: 1772.097624 from(1773.104900,1+) intensity(0.0000) index(12)

Title: Label: H9, Spot\_Id: 228977, Peak\_List\_Id: 257859, MSMS Job\_Run\_Id: 24940, Comment:

Data file ppw\_H9\_138985153400.txt

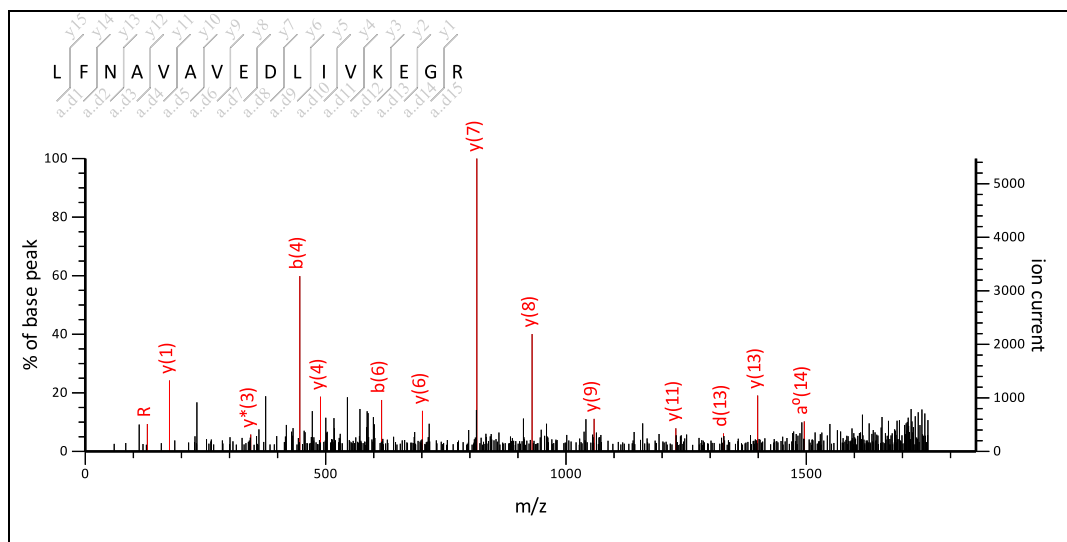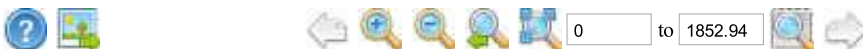
 Label all possible matches  Label matches used for scoring 

Monoisotopic mass of neutral peptide Mr(calc): 1771.9832

Fixed modifications: Carbamidomethyl (C) (apply to specified residues or termini only)

Ions Score: 77 Expect: 1.5e-05

 Matches : 17/283 fragment ions using 17 most intense peaks ([help](#))

| #  | Immon.   | a         | a*        | a <sup>0</sup> | b         | b*        | b <sup>0</sup> | d         | d'        | Seq. | v         | w         | w'       | y         | y*        |
|----|----------|-----------|-----------|----------------|-----------|-----------|----------------|-----------|-----------|------|-----------|-----------|----------|-----------|-----------|
| 1  | 86.0964  | 86.0964   |           |                | 114.0913  |           |                | 44.0495   |           | L    |           |           |          |           |           |
| 2  | 120.0808 | 233.1648  |           |                | 261.1598  |           |                |           |           | F    | 1567.8438 |           |          | 1659.9064 | 1642.8799 |
| 3  | 87.0553  | 347.2078  | 330.1812  |                | 375.2027  | 358.1761  |                | 304.2020  |           | N    | 1453.8009 | 1452.8057 |          | 1512.8380 | 1495.8115 |
| 4  | 44.0495  | 418.2449  | 401.2183  |                | 446.2398  | 429.2132  |                |           |           | A    | 1382.7638 |           |          | 1398.7951 | 1381.7686 |
| 5  | 72.0808  | 517.3133  | 500.2867  |                | 545.3082  | 528.2817  |                | 503.2976  |           | V    | 1283.6954 | 1296.7158 |          | 1327.7580 | 1310.7314 |
| 6  | 44.0495  | 588.3504  | 571.3239  |                | 616.3453  | 599.3188  |                |           |           | A    | 1212.6583 |           |          | 1228.6896 | 1211.6630 |
| 7  | 72.0808  | 687.4188  | 670.3923  |                | 715.4137  | 698.3872  |                | 673.4032  |           | V    | 1113.5899 | 1126.6103 |          | 1157.6525 | 1140.6259 |
| 8  | 102.0550 | 816.4614  | 799.4349  | 798.4508       | 844.4563  | 827.4298  | 826.4458       | 758.4559  |           | E    | 984.5473  | 983.5520  |          | 1058.5840 | 1041.5575 |
| 9  | 88.0393  | 931.4884  | 914.4618  | 913.4778       | 959.4833  | 942.4567  | 941.4727       | 887.4985  |           | D    | 869.5203  | 868.5251  |          | 929.5415  | 912.5149  |
| 10 | 86.0964  | 1044.5724 | 1027.5459 | 1026.5619      | 1072.5673 | 1055.5408 | 1054.5568      | 1002.5255 |           | L    | 756.4363  | 755.4410  |          | 814.5145  | 797.4880  |
| 11 | 86.0964  | 1157.6565 | 1140.6299 | 1139.6459      | 1185.6514 | 1168.6249 | 1167.6408      | 1129.6252 | 1143.6408 | I    | 643.3522  | 656.3726  | 670.3883 | 701.4304  | 684.4039  |
| 12 | 72.0808  | 1256.7249 | 1239.6984 | 1238.7143      | 1284.7198 | 1267.6933 | 1266.7092      | 1242.7092 |           | V    | 544.2838  | 557.3042  |          | 588.3464  | 571.3198  |
| 13 | 101.1073 | 1384.8199 | 1367.7933 | 1366.8093      | 1412.8148 | 1395.7882 | 1394.8042      | 1327.7620 |           | K    | 416.1888  | 415.1936  |          | 489.2780  | 472.2514  |
| 14 | 102.0550 | 1513.8625 | 1496.8359 | 1495.8519      | 1541.8574 | 1524.8308 | 1523.8468      | 1455.8570 |           | E    | 287.1462  | 286.1510  |          | 361.1830  | 344.1565  |
| 15 | 30.0338  | 1570.8839 | 1553.8574 | 1552.8734      | 1598.8788 | 1581.8523 | 1580.8683      |           |           | G    |           |           |          | 232.1404  | 215.1139  |
| 16 | 129.1135 |           |           |                |           |           |                |           |           | R    | 74.0237   | 73.0284   |          | 175.1190  | 158.0924  |

| Seq    | ya       | yb       | Seq     | ya       | yb       | Seq   | ya       | yb       |
|--------|----------|----------|---------|----------|----------|-------|----------|----------|
| FN     | 234.1237 | 262.1186 | FNA     | 305.1608 | 333.1557 | FNAV  | 404.2292 | 432.2241 |
| FNAVA  | 475.2663 | 503.2613 | FNAVAV  | 574.3348 | 602.3297 | NA    | 158.0924 | 186.0873 |
| NAV    | 257.1608 | 285.1557 | NAVA    | 328.1979 | 356.1928 | NAVAV | 427.2663 | 455.2613 |
| NAVAVE | 556.3089 | 584.3039 | NAVAVED | 671.3359 | 699.3308 | AV    | 143.1179 | 171.1128 |

|                        |          |          |                         |          |                 |                        |          |          |
|------------------------|----------|----------|-------------------------|----------|-----------------|------------------------|----------|----------|
| <a href="#">AVA</a>    | 214.1550 | 242.1499 | <a href="#">AVAV</a>    | 313.2234 | 341.2183        | <a href="#">AVAVE</a>  | 442.2660 | 470.2609 |
| <a href="#">AVAVED</a> | 557.2930 | 585.2879 | <a href="#">AVAVEDL</a> | 670.3770 | 698.3719        | <a href="#">VA</a>     | 143.1179 | 171.1128 |
| <a href="#">VAV</a>    | 242.1863 | 270.1812 | <a href="#">VAVE</a>    | 371.2289 | 399.2238        | <a href="#">VAVED</a>  | 486.2558 | 514.2508 |
| <a href="#">VAVEDL</a> | 599.3399 | 627.3348 | <a href="#">AV</a>      | 143.1179 | 171.1128        | <a href="#">AVE</a>    | 272.1605 | 300.1554 |
| <a href="#">AVED</a>   | 387.1874 | 415.1823 | <a href="#">AVEDL</a>   | 500.2715 | 528.2664        | <a href="#">AVEDLI</a> | 613.3556 | 641.3505 |
| <a href="#">VE</a>     | 201.1234 | 229.1183 | <a href="#">VED</a>     | 316.1503 | <b>344.1452</b> | <a href="#">VEDL</a>   | 429.2344 | 457.2293 |
| <a href="#">VEDLI</a>  | 542.3184 | 570.3134 | <a href="#">VEDLIV</a>  | 641.3869 | 669.3818        | <a href="#">ED</a>     | 217.0819 | 245.0768 |
| <a href="#">EDL</a>    | 330.1660 | 358.1609 | <a href="#">EDLI</a>    | 443.2500 | 471.2449        | <a href="#">EDLIV</a>  | 542.3184 | 570.3134 |
| <a href="#">EDLIVK</a> | 670.4134 | 698.4083 | <a href="#">DL</a>      | 201.1234 | 229.1183        | <a href="#">DLI</a>    | 314.2074 | 342.2023 |
| <a href="#">DLIV</a>   | 413.2758 | 441.2708 | <a href="#">DLIVK</a>   | 541.3708 | 569.3657        | <a href="#">DLIVKE</a> | 670.4134 | 698.4083 |
| <a href="#">LI</a>     | 199.1805 | 227.1754 | <a href="#">LIV</a>     | 298.2489 | 326.2438        | <a href="#">LIVK</a>   | 426.3439 | 454.3388 |
| <a href="#">LIVKE</a>  | 555.3865 | 583.3814 | <a href="#">LIVKEG</a>  | 612.4079 | 640.4028        | <a href="#">IV</a>     | 185.1648 | 213.1598 |
| <a href="#">IVK</a>    | 313.2598 | 341.2547 | <a href="#">IVKE</a>    | 442.3024 | 470.2973        | <a href="#">IVKEG</a>  | 499.3239 | 527.3188 |
| <a href="#">VK</a>     | 200.1757 | 228.1707 | <a href="#">VKE</a>     | 329.2183 | 357.2132        | <a href="#">VKEG</a>   | 386.2398 | 414.2347 |
| <a href="#">KE</a>     | 230.1499 | 258.1448 | <a href="#">KEG</a>     | 287.1714 | 315.1663        | <a href="#">EG</a>     | 159.0764 | 187.0713 |

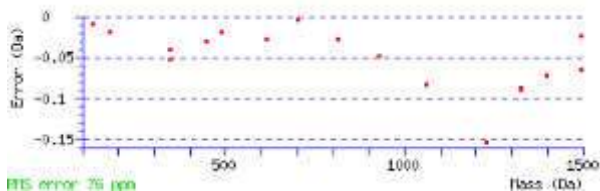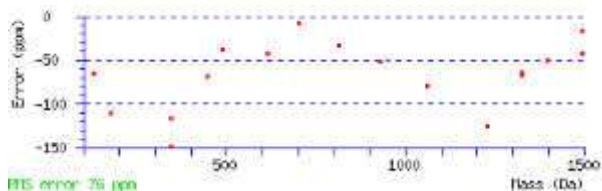

NCBI BLAST search of [LFNAVAVEDLIVKEGR](#)

(Parameters: blastp, nr protein database, expect=20000, no filter, PAM30)

Other BLAST [web gateways](#)

#### All matches to this query

| Score | M <sub>r</sub> (calc) | Delta  | Sequence                          |
|-------|-----------------------|--------|-----------------------------------|
| 76.5  | 1771.9832             | 0.1144 | <a href="#">LFNAVAVEDLIVKEGR</a>  |
| 19.6  | 1771.9502             | 0.1474 | <a href="#">RSAMLILGSDSPAVVEK</a> |
| 18.4  | 1771.9250             | 0.1726 | <a href="#">EMNLRAELISQLEAR</a>   |
| 16.4  | 1771.9581             | 0.1396 | <a href="#">LFNAVAAEDLIIRGDR</a>  |
| 16.0  | 1771.9325             | 0.1652 | <a href="#">QVDEVLLVGGMTRMPK</a>  |
| 15.9  | 1771.9291             | 0.1685 | <a href="#">MARIGSPEEVVGVWK</a>   |
| 14.0  | 1771.9316             | 0.1660 | <a href="#">DDSKVLLTSPTANGINK</a> |
| 12.7  | 1771.9693             | 0.1283 | <a href="#">NIFIVRAINEGGNTVR</a>  |
| 10.8  | 1771.9614             | 0.1362 | <a href="#">SCHADALITAIREAR</a>   |
| 10.8  | 1772.0084             | 0.0892 | <a href="#">LNKILFLDDDIVVOK</a>   |

Mascot: <http://www.matrixscience.com/>

**MATRIX SCIENCE Mascot Search Results**

**Peptide View Spot no 49**

MS/MS Fragmentation of **VVVSSCGHDGPFGATGVKR**

Found in **gi27261025** in **NCBI nr**, putative thiamine biosynthesis protein [Oryza sativa Japonica Group]

Match to Query 32: 1929.079224 from(1930.086500,1+) intensity(0.0000) index(14)

Title: Label: H9, Spot\_Id: 228977, Peak\_List\_Id: 257872, MSMS Job\_Run\_Id: 24940, Comment:

Data file ppw\_H9\_138985153400.txt

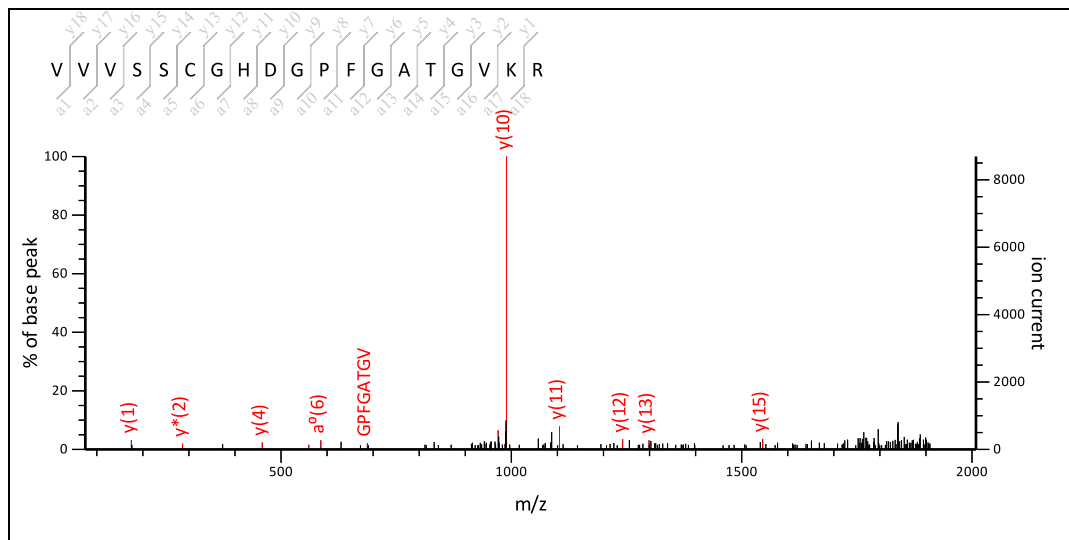

Navigation icons: Home, Back, Forward, Search, etc. Range: 75.12 to 2008.65

Label all possible matches  Label matches used for scoring

Monoisotopic mass of neutral peptide Mr(calc): 1928.9527

Fixed modifications: Carbamidomethyl (C) (apply to specified residues or termini only)

Ions Score: 53 Expect: 0.0082

Matches: 16/333 fragment ions using 18 most intense peaks (help)

| #  | Immon.   | a         | a*        | a <sup>0</sup> | b         | b*        | b <sup>0</sup> | d         | d'        | Seq. | v         | w         | w'       | y         | y*        |
|----|----------|-----------|-----------|----------------|-----------|-----------|----------------|-----------|-----------|------|-----------|-----------|----------|-----------|-----------|
| 1  | 72.0808  | 72.0808   |           |                | 100.0757  |           |                | 44.0495   |           | V    |           |           |          |           |           |
| 2  | 72.0808  | 171.1492  |           |                | 199.1441  |           |                | 157.1335  |           | V    | 1786.8289 | 1799.8493 |          | 1830.8915 | 1813.8650 |
| 3  | 72.0808  | 270.2176  |           |                | 298.2125  |           |                | 256.2020  |           | V    | 1687.7605 | 1700.7809 |          | 1731.8231 | 1714.7966 |
| 4  | 60.0444  | 357.2496  |           | 339.2391       | 385.2445  |           | 367.2340       | 341.2547  |           | S    | 1600.7285 | 1599.7333 |          | 1632.7547 | 1615.7282 |
| 5  | 60.0444  | 444.2817  |           | 426.2711       | 472.2766  |           | 454.2660       | 428.2867  |           | S    | 1513.6965 | 1512.7012 |          | 1545.7227 | 1528.6961 |
| 6  | 133.0430 | 604.3123  |           | 586.3017       | 632.3072  |           | 614.2967       | 515.3188  |           | C    | 1353.6658 | 1352.6706 |          | 1458.6907 | 1441.6641 |
| 7  | 30.0338  | 661.3338  |           | 643.3232       | 689.3287  |           | 671.3181       |           |           | G    |           |           |          | 1298.6600 | 1281.6335 |
| 8  | 110.0713 | 798.3927  |           | 780.3821       | 826.3876  |           | 808.3770       |           |           | H    | 1159.5854 |           |          | 1241.6385 | 1224.6120 |
| 9  | 88.0393  | 913.4196  |           | 895.4091       | 941.4145  |           | 923.4040       | 869.4298  |           | D    | 1044.5585 | 1043.5633 |          | 1104.5796 | 1087.5531 |
| 10 | 30.0338  | 970.4411  |           | 952.4305       | 998.4360  |           | 980.4254       |           |           | G    |           |           |          | 989.5527  | 972.5261  |
| 11 | 70.0651  | 1067.4939 |           | 1049.4833      | 1095.4888 |           | 1077.4782      | 1041.4782 |           | P    | 890.4843  | 889.4890  |          | 932.5312  | 915.5047  |
| 12 | 120.0808 | 1214.5623 |           | 1196.5517      | 1242.5572 |           | 1224.5466      |           |           | F    | 743.4159  |           |          | 835.4785  | 818.4519  |
| 13 | 30.0338  | 1271.5837 |           | 1253.5732      | 1299.5786 |           | 1281.5681      |           |           | G    |           |           |          | 688.4100  | 671.3835  |
| 14 | 44.0495  | 1342.6208 |           | 1324.6103      | 1370.6158 |           | 1352.6052      |           |           | A    | 615.3573  |           |          | 631.3886  | 614.3620  |
| 15 | 74.0600  | 1443.6685 |           | 1425.6580      | 1471.6634 |           | 1453.6529      | 1427.6736 | 1429.6529 | T    | 514.3096  | 527.3300  | 529.3093 | 560.3515  | 543.3249  |
| 16 | 30.0338  | 1500.6900 |           | 1482.6794      | 1528.6849 |           | 1510.6743      |           |           | G    |           |           |          | 459.3038  | 442.2772  |
| 17 | 72.0808  | 1599.7584 |           | 1581.7478      | 1627.7533 |           | 1609.7428      | 1585.7428 |           | V    | 358.2197  | 371.2401  |          | 402.2823  | 385.2558  |
| 18 | 101.1073 | 1727.8534 | 1710.8268 | 1709.8428      | 1755.8483 | 1738.8217 | 1737.8377      | 1670.7955 |           | K    | 230.1248  | 229.1295  |          | 303.2139  | 286.1874  |
| 19 | 129.1135 |           |           |                |           |           |                |           |           | R    | 74.0237   | 73.0284   |          | 175.1190  | 158.0924  |

| Seq | ya       | yb       | Seq | ya       | yb       | Seq  | ya       | yb       |
|-----|----------|----------|-----|----------|----------|------|----------|----------|
| VV  | 171.1492 | 199.1441 | VVS | 258.1812 | 286.1761 | VVSS | 345.2132 | 373.2082 |

|        |          |          |         |          |          |         |          |          |
|--------|----------|----------|---------|----------|----------|---------|----------|----------|
| VVSSC  | 505.2439 | 533.2388 | VVSSCG  | 562.2654 | 590.2603 | VVSSCGH | 699.3243 | 727.3192 |
| VS     | 159.1128 | 187.1077 | VSS     | 246.1448 | 274.1397 | VSSC    | 406.1755 | 434.1704 |
| VSSCG  | 463.1969 | 491.1919 | VSSCGH  | 600.2559 | 628.2508 | SS      | 147.0764 | 175.0713 |
| SSC    | 307.1071 | 335.1020 | SSCG    | 364.1285 | 392.1234 | SSCGH   | 501.1874 | 529.1824 |
| SSCGHD | 616.2144 | 644.2093 | SSCGHDG | 673.2358 | 701.2308 | SC      | 220.0750 | 248.0700 |
| SCG    | 277.0965 | 305.0914 | SCGH    | 414.1554 | 442.1503 | SCGHD   | 529.1824 | 557.1773 |
| SCGHDG | 586.2038 | 614.1987 | SCGHDGP | 683.2566 | 711.2515 | CG      | 190.0645 | 218.0594 |
| CGH    | 327.1234 | 355.1183 | CGHD    | 442.1503 | 470.1452 | CGHDG   | 499.1718 | 527.1667 |
| CGHDGP | 596.2246 | 624.2195 | GH      | 167.0927 | 195.0877 | GHD     | 282.1197 | 310.1146 |
| GHDG   | 339.1411 | 367.1361 | GHDGP   | 436.1939 | 464.1888 | GHDGPF  | 583.2623 | 611.2572 |
| GHDGPF | 640.2838 | 668.2787 | HD      | 225.0982 | 253.0931 | HDG     | 282.1197 | 310.1146 |
| HDGP   | 379.1724 | 407.1674 | HDGPF   | 526.2409 | 554.2358 | HDGPF   | 583.2623 | 611.2572 |
| HDGPF  | 654.2994 | 682.2944 | DG      | 145.0608 | 173.0557 | DGP     | 242.1135 | 270.1084 |
| DGPF   | 389.1819 | 417.1769 | DGPF    | 446.2034 | 474.1983 | DGPF    | 517.2405 | 545.2354 |
| DGPF   | 618.2882 | 646.2831 | DGPF    | 675.3097 | 703.3046 | GP      | 127.0866 | 155.0815 |
| GP     | 274.1550 | 302.1499 | GP      | 331.1765 | 359.1714 | GP      | 402.2136 | 430.2085 |
| GP     | 503.2613 | 531.2562 | GP      | 560.2827 | 588.2776 | GP      | 659.3511 | 687.3461 |
| PF     | 217.1335 | 245.1285 | PFG     | 274.1550 | 302.1499 | PFG     | 345.1921 | 373.1870 |
| PFG    | 446.2398 | 474.2347 | PFG     | 503.2613 | 531.2562 | PFG     | 602.3297 | 630.3246 |
| FG     | 177.1022 | 205.0972 | FGA     | 248.1394 | 276.1343 | FGA     | 349.1870 | 377.1819 |
| FGA    | 406.2085 | 434.2034 | FGA     | 505.2769 | 533.2718 | FGA     | 633.3719 | 661.3668 |
| GAT    | 101.0709 | 129.0659 | GAT     | 202.1186 | 230.1135 | GAT     | 259.1401 | 287.1350 |
| GAT    | 358.2085 | 386.2034 | GAT     | 486.3035 | 514.2984 | AT      | 145.0972 | 173.0921 |
| ATG    | 202.1186 | 230.1135 | ATG     | 301.1870 | 329.1819 | ATG     | 429.2820 | 457.2769 |
| TG     | 131.0815 | 159.0764 | TG      | 230.1499 | 258.1448 | TG      | 358.2449 | 386.2398 |
| GV     | 129.1022 | 157.0972 | GV      | 257.1972 | 285.1921 | VK      | 200.1757 | 228.1707 |

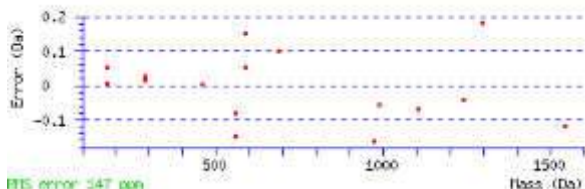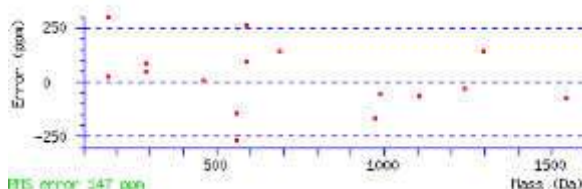

NCBI BLAST search of [VVVSSCGHDGPFGATGVK](#)  
 (Parameters: blastp, nr protein database, expect=20000, no filter, PAM30)  
 Other BLAST [web gateways](#)

All matches to this query

| Score | M(-calculated) | Delta   | Sequence                            |
|-------|----------------|---------|-------------------------------------|
| 53.0  | 1928.9527      | 0.1265  | <a href="#">VVVSSCGHDGPFGATGVK</a>  |
| 40.5  | 1928.9197      | 0.1595  | <a href="#">VVVSSCGHDGPMGATGVK</a>  |
| 9.3   | 1928.8878      | 0.1915  | <a href="#">FGGNGQOHYTDAPPR</a>     |
| 6.7   | 1929.0935      | -0.0143 | <a href="#">IPLVYELVSNGLSK</a>      |
| 6.5   | 1928.9495      | 0.1297  | <a href="#">WVVELSQFDIYFMP</a>      |
| 5.6   | 1929.0068      | 0.0724  | <a href="#">NAGSKHFTVSLDTGNLR</a>   |
| 4.3   | 1928.9884      | 0.0908  | <a href="#">SKETAPVIDVTOFGYFK</a>   |
| 3.3   | 1928.9998      | 0.0794  | <a href="#">LCMORAADALLGICLPK</a>   |
| 3.1   | 1928.9052      | 0.1740  | <a href="#">FVEMTSASIAMSFFAFK</a>   |
| 3.0   | 1928.9076      | 0.1717  | <a href="#">LAESEQAGDLVVGEGEGGR</a> |

Mascot: <http://www.matrixscience.com/>

**MATRIX SCIENCE Mascot Search Results**

**Peptide View Spot no 49**

MS/MS Fragmentation of **EVVPGMIVTGMEVAEIDGAPR**

Found in **gi|27261025** in **NCBIInr**, putative thiamine biosynthesis protein [Oryza sativa Japonica Group]

Match to Query 36: 2169.228524 from(2170.235800,1+) intensity(0.0000) index(16)

Title: Label: H9, Spot\_Id: 228977, Peak\_List\_Id: 257865, MSMS Job\_Run\_Id: 24940, Comment:

Data file ppw\_H9\_138985153400.txt

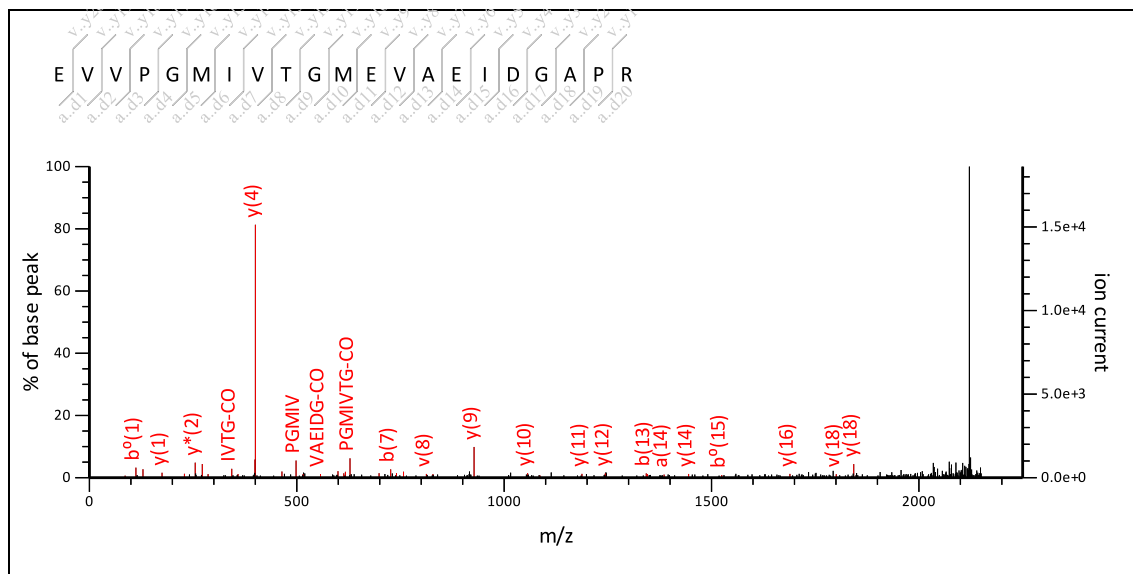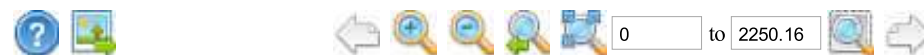

Label all possible matches  Label matches used for scoring

Monoisotopic mass of neutral peptide Mr(calc): 2169.0810

Fixed modifications: Carbamidomethyl (C) (apply to specified residues or termini only)

Ions Score: 76 Expect: 3.5e-05

Matches : 61/386 fragment ions using 105 most intense peaks ([help](#))

| #  | Immon.   | a         | a <sup>0</sup> | b         | b <sup>0</sup> | d         | d'        | Seq. | v         | w         | w'        | y         | y*        | y <sup>0</sup> | #  |
|----|----------|-----------|----------------|-----------|----------------|-----------|-----------|------|-----------|-----------|-----------|-----------|-----------|----------------|----|
| 1  | 102.0550 | 102.0550  | 84.0444        | 130.0499  | 112.0393       | 44.0495   |           | E    |           |           |           |           |           |                | 21 |
| 2  | 72.0808  | 201.1234  | 183.1128       | 229.1183  | 211.1077       | 187.1077  |           | V    | 1996.9831 | 2010.0035 |           | 2041.0457 | 2024.0191 | 2023.0351      | 20 |
| 3  | 72.0808  | 300.1918  | 282.1812       | 328.1867  | 310.1761       | 286.1761  |           | V    | 1897.9146 | 1910.9350 |           | 1941.9772 | 1924.9507 | 1923.9667      | 19 |
| 4  | 70.0651  | 397.2445  | 379.2340       | 425.2395  | 407.2289       | 371.2289  |           | P    | 1800.8619 | 1799.8666 |           | 1842.9088 | 1825.8823 | 1824.8983      | 18 |
| 5  | 30.0338  | 454.2660  | 436.2554       | 482.2609  | 464.2504       |           |           | G    |           |           |           | 1745.8561 | 1728.8295 | 1727.8455      | 17 |
| 6  | 104.0528 | 585.3065  | 567.2959       | 613.3014  | 595.2908       | 525.3031  |           | M    | 1612.7999 | 1611.8047 |           | 1688.8346 | 1671.8081 | 1670.8240      | 16 |
| 7  | 86.0964  | 698.3906  | 680.3800       | 726.3855  | 708.3749       | 670.3593  | 684.3749  | I    | 1499.7159 | 1512.7363 | 1526.7519 | 1557.7941 | 1540.7676 | 1539.7836      | 15 |
| 8  | 72.0808  | 797.4590  | 779.4484       | 825.4539  | 807.4433       | 783.4433  |           | V    | 1400.6475 | 1413.6679 |           | 1444.7101 | 1427.6835 | 1426.6995      | 14 |
| 9  | 74.0600  | 898.5067  | 880.4961       | 926.5016  | 908.4910       | 882.5117  | 884.4910  | T    | 1299.5998 | 1312.6202 | 1314.5994 | 1345.6416 | 1328.6151 | 1327.6311      | 13 |
| 10 | 30.0338  | 955.5281  | 937.5176       | 983.5230  | 965.5125       |           |           | G    |           |           |           | 1244.5940 | 1227.5674 | 1226.5834      | 12 |
| 11 | 104.0528 | 1086.5686 | 1068.5580      | 1114.5635 | 1096.5530      | 1026.5652 |           | M    | 1111.5378 | 1110.5426 |           | 1187.5725 | 1170.5460 | 1169.5619      | 11 |
| 12 | 102.0550 | 1215.6112 | 1197.6006      | 1243.6061 | 1225.5955      | 1157.6057 |           | E    | 982.4952  | 981.5000  |           | 1056.5320 | 1039.5055 | 1038.5215      | 10 |
| 13 | 72.0808  | 1314.6796 | 1296.6690      | 1342.6745 | 1324.6640      | 1300.6640 |           | V    | 883.4268  | 896.4472  |           | 927.4894  | 910.4629  | 909.4789       | 9  |
| 14 | 44.0495  | 1385.7167 | 1367.7062      | 1413.7116 | 1395.7011      |           |           | A    | 812.3897  |           |           | 828.4210  | 811.3945  | 810.4104       | 8  |
| 15 | 102.0550 | 1514.7593 | 1496.7488      | 1542.7542 | 1524.7437      | 1456.7538 |           | E    | 683.3471  | 682.3519  |           | 757.3839  | 740.3573  | 739.3733       | 7  |
| 16 | 86.0964  | 1627.8434 | 1609.8328      | 1655.8383 | 1637.8277      | 1599.8121 | 1613.8277 | I    | 570.2631  | 583.2835  | 597.2991  | 628.3413  | 611.3148  | 610.3307       | 6  |
| 17 | 88.0393  | 1742.8703 | 1724.8598      | 1770.8652 | 1752.8547      | 1698.8805 |           | D    | 455.2361  | 454.2409  |           | 515.2572  | 498.2307  | 497.2467       | 5  |
| 18 | 30.0338  | 1799.8918 | 1781.8812      | 1827.8867 | 1809.8761      |           |           | G    |           |           |           | 400.2303  | 383.2037  |                | 4  |
| 19 | 44.0495  | 1870.9289 | 1852.9183      | 1898.9238 | 1880.9133      |           |           | A    | 327.1775  |           |           | 343.2088  | 326.1823  |                | 3  |

|    |          |           |           |           |           |           |  |   |          |          |  |          |          |  |   |
|----|----------|-----------|-----------|-----------|-----------|-----------|--|---|----------|----------|--|----------|----------|--|---|
| 20 | 70.0651  | 1967.9817 | 1949.9711 | 1995.9766 | 1977.9660 | 1941.9660 |  | P | 230.1248 | 229.1295 |  | 272.1717 | 255.1452 |  | 2 |
| 21 | 129.1135 |           |           |           |           |           |  | R | 74.0237  | 73.0284  |  | 175.1190 | 158.0924 |  | 1 |

| Seq     | ya       | yb       | Seq     | ya       | yb       | Seq      | ya       | yb       |
|---------|----------|----------|---------|----------|----------|----------|----------|----------|
| VV      | 171.1492 | 199.1441 | VVP     | 268.2020 | 296.1969 | VVPG     | 325.2234 | 353.2183 |
| VVPGM   | 456.2639 | 484.2588 | VVPGMI  | 569.3480 | 597.3429 | VVPGMIV  | 668.4164 | 696.4113 |
| VP      | 169.1335 | 197.1285 | VPG     | 226.1550 | 254.1499 | VPGM     | 357.1955 | 385.1904 |
| VPGMI   | 470.2796 | 498.2745 | VPGMIV  | 569.3480 | 597.3429 | VPGMIVT  | 670.3956 | 698.3906 |
| PG      | 127.0866 | 155.0815 | PGM     | 258.1271 | 286.1220 | PGMI     | 371.2111 | 399.2061 |
| PGMIV   | 470.2796 | 498.2745 | PGMIVT  | 571.3272 | 599.3221 | PGMIVTG  | 628.3487 | 656.3436 |
| GM      | 161.0743 | 189.0692 | GMI     | 274.1584 | 302.1533 | GMIIV    | 373.2268 | 401.2217 |
| GMIIVT  | 474.2745 | 502.2694 | GMIIVTG | 531.2959 | 559.2908 | GMIIVTGM | 662.3364 | 690.3313 |
| MI      | 217.1369 | 245.1318 | MIV     | 316.2053 | 344.2002 | MIVT     | 417.2530 | 445.2479 |
| MIVTG   | 474.2745 | 502.2694 | MIVTGM  | 605.3150 | 633.3099 | IV       | 185.1648 | 213.1598 |
| IVT     | 286.2125 | 314.2074 | IVTG    | 343.2340 | 371.2289 | IVTGM    | 474.2745 | 502.2694 |
| IVTGME  | 603.3171 | 631.3120 | VT      | 173.1285 | 201.1234 | VTG      | 230.1499 | 258.1448 |
| VTGM    | 361.1904 | 389.1853 | VTGME   | 490.2330 | 518.2279 | VTGMEV   | 589.3014 | 617.2963 |
| VTGMEVA | 660.3385 | 688.3334 | TG      | 131.0815 | 159.0764 | TGM      | 262.1220 | 290.1169 |
| TGME    | 391.1646 | 419.1595 | TGMEV   | 490.2330 | 518.2279 | TGMEVA   | 561.2701 | 589.2650 |
| TGMEVAE | 690.3127 | 718.3076 | GM      | 161.0743 | 189.0692 | GME      | 290.1169 | 318.1118 |
| GMEV    | 389.1853 | 417.1802 | GMEVA   | 460.2224 | 488.2173 | GMEVAE   | 589.2650 | 617.2599 |
| ME      | 233.0954 | 261.0904 | MEV     | 332.1639 | 360.1588 | MEVA     | 403.2010 | 431.1959 |
| MEVAE   | 532.2436 | 560.2385 | MEVAEI  | 645.3276 | 673.3225 | EV       | 201.1234 | 229.1183 |
| EVA     | 272.1605 | 300.1554 | EVAE    | 401.2031 | 429.1980 | EVAEI    | 514.2871 | 542.2821 |
| EVAEID  | 629.3141 | 657.3090 | EVAEIDG | 686.3355 | 714.3305 | VA       | 143.1179 | 171.1128 |
| VAE     | 272.1605 | 300.1554 | VAEI    | 385.2445 | 413.2395 | VAEID    | 500.2715 | 528.2664 |
| VAEIDG  | 557.2930 | 585.2879 | VAEIDGA | 628.3301 | 656.3250 | AE       | 173.0921 | 201.0870 |
| AEI     | 286.1761 | 314.1710 | AEID    | 401.2031 | 429.1980 | AEIDG    | 458.2245 | 486.2195 |
| AEIDGA  | 529.2617 | 557.2566 | AEIDGAP | 626.3144 | 654.3093 | EI       | 215.1390 | 243.1339 |
| EID     | 330.1660 | 358.1609 | EIDG    | 387.1874 | 415.1823 | EIDGA    | 458.2245 | 486.2195 |
| EIDGAP  | 555.2773 | 583.2722 | ID      | 201.1234 | 229.1183 | IDG      | 258.1448 | 286.1397 |
| IDGA    | 329.1819 | 357.1769 | IDGAP   | 426.2347 | 454.2296 | DG       | 145.0608 | 173.0557 |
| DGA     | 216.0979 | 244.0928 | DGAP    | 313.1506 | 341.1456 | GA       | 101.0709 | 129.0659 |
| GAP     | 198.1237 | 226.1186 | AP      | 141.1022 | 169.0972 |          |          |          |

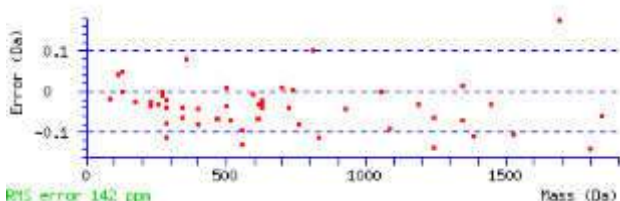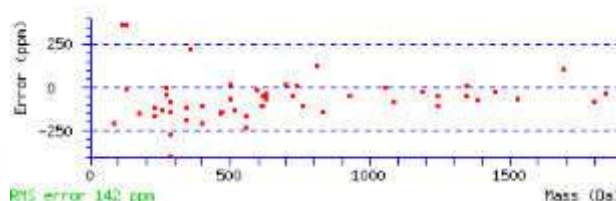

NCBI BLAST search of [EVVPGMIVTGMEVAEIDGAPR](#)  
 (Parameters: blastp, nr protein database, expect=20000, no filter, PAM30)  
 Other BLAST [web gateways](#)

All matches to this query

| Score | Mr(calc)  | Delta   | Sequence                              |
|-------|-----------|---------|---------------------------------------|
| 75.9  | 2169.0810 | 0.1475  | <a href="#">EVVPGMIVTGMEVAEIDGAPR</a> |
| 7.0   | 2169.1218 | 0.1067  | <a href="#">GVLEVEIFHGEYNATVKHK</a>   |
| 6.1   | 2169.1389 | 0.0896  | <a href="#">NQIVLVAEDTDGSAIAELRR</a>  |
| 6.0   | 2169.2330 | -0.0045 | <a href="#">VAEKDLVTVIELLMNELIK</a>   |
| 5.1   | 2169.1001 | 0.1284  | <a href="#">FTVTGRLSVFAVMGDLNNGR</a>  |

|     |           |        |                                        |
|-----|-----------|--------|----------------------------------------|
| 4.6 | 2169.1688 | 0.0597 | <a href="#">SLMSTARASLRPAAPSSTLPR</a>  |
| 4.6 | 2169.0161 | 0.2125 | <a href="#">ELPNPTNPMASSSNPTPPFR</a>   |
| 4.5 | 2169.1827 | 0.0458 | <a href="#">RLDMLPSLLSENLASLLER</a>    |
| 4.4 | 2169.1389 | 0.0896 | <a href="#">SSQAENIEINTGOIQGVIR</a>    |
| 4.4 | 2169.1165 | 0.1121 | <a href="#">DADQLPKVLEDGVTA AAIESK</a> |

Mascot: <http://www.matrixscience.com/>



**MATRIX SCIENCE Mascot Search Results**

**Peptide View Spot no 49**

MS/MS Fragmentation of **EVVPGMIVTGMVEVAEIDGAPR**

Found in **gi|27261025** in **NCBIInr**, putative thiamine biosynthesis protein [Oryza sativa Japonica Group]

Match to Query 38: 2185.194624 from(2186.201900,1+) intensity(0.0000) index(17)

Title: Label: H9, Spot\_Id: 228977, Peak\_List\_Id: 257876, MSMS Job\_Run\_Id: 24940, Comment:

Data file ppw\_H9\_138985153400.txt

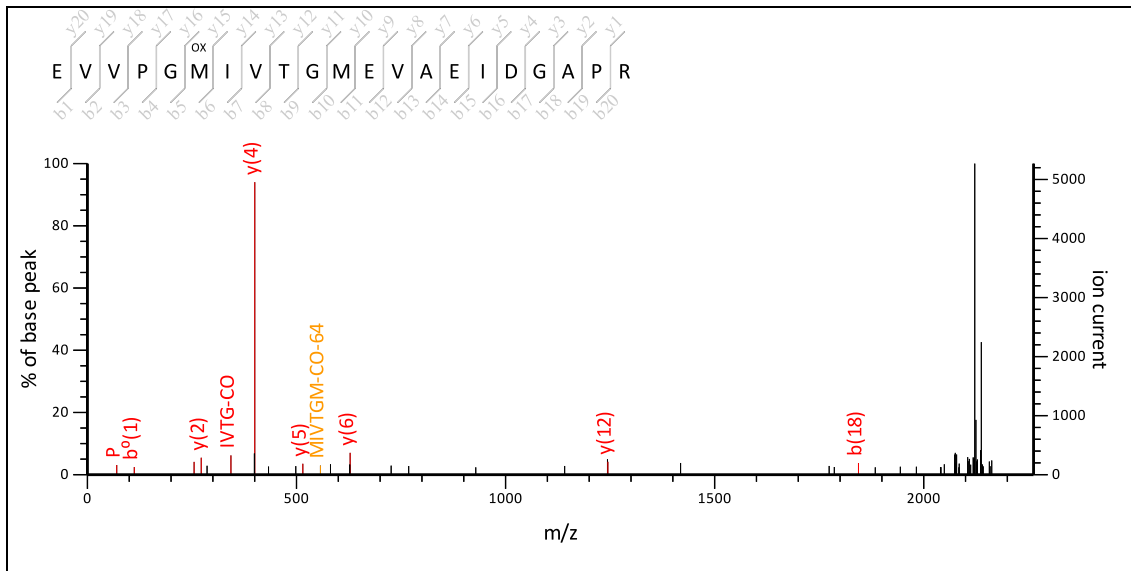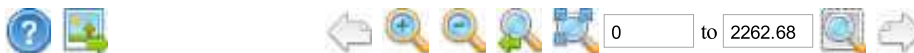

Label all possible matches  Label matches used for scoring

**Monoisotopic mass of neutral peptide Mr(calc):** 2185.0759

**Fixed modifications:** Carbamidomethyl (C) (apply to specified residues or termini only)

**Variable modifications:**

**M6** : Oxidation (M), with neutral losses 0.0000 (shown in table), 63.9983

**Ions Score:** 21 **Expect:** 11

**Matches** : 18/521 fragment ions using 26 most intense peaks ([help](#))

| #  | Immon.   | a         | a <sup>0</sup> | b         | b <sup>0</sup> | d         | d'        | Seq. | v         | w         | w'        | y         | y*        | y <sup>0</sup> | #  |
|----|----------|-----------|----------------|-----------|----------------|-----------|-----------|------|-----------|-----------|-----------|-----------|-----------|----------------|----|
| 1  | 102.0550 | 102.0550  | 84.0444        | 130.0499  | 112.0393       | 44.0495   |           | E    |           |           |           |           |           |                | 21 |
| 2  | 72.0808  | 201.1234  | 183.1128       | 229.1183  | 211.1077       | 187.1077  |           | V    | 2012.9780 | 2025.9984 |           | 2057.0406 | 2040.0140 | 2039.0300      | 20 |
| 3  | 72.0808  | 300.1918  | 282.1812       | 328.1867  | 310.1761       | 286.1761  |           | V    | 1913.9096 | 1926.9300 |           | 1957.9722 | 1940.9456 | 1939.9616      | 19 |
| 4  | 70.0651  | 397.2445  | 379.2340       | 425.2395  | 407.2289       | 371.2289  |           | P    | 1816.8568 | 1815.8616 |           | 1858.9037 | 1841.8772 | 1840.8932      | 18 |
| 5  | 30.0338  | 454.2660  | 436.2554       | 482.2609  | 464.2504       |           |           | G    |           |           |           | 1761.8510 | 1744.8244 | 1743.8404      | 17 |
| 6  | 120.0478 | 601.3014  | 583.2908       | 629.2963  | 611.2858       | 525.3031  |           | M    | 1612.7999 | 1611.8047 |           | 1704.8295 | 1687.8030 | 1686.8190      | 16 |
| 7  | 86.0964  | 714.3855  | 696.3749       | 742.3804  | 724.3698       | 686.3542  | 700.3698  | I    | 1499.7159 | 1512.7363 | 1526.7519 | 1557.7941 | 1540.7676 | 1539.7836      | 15 |
| 8  | 72.0808  | 813.4539  | 795.4433       | 841.4488  | 823.4382       | 799.4382  |           | V    | 1400.6475 | 1413.6679 |           | 1444.7101 | 1427.6835 | 1426.6995      | 14 |
| 9  | 74.0600  | 914.5016  | 896.4910       | 942.4965  | 924.4859       | 898.5067  | 900.4859  | T    | 1299.5998 | 1312.6202 | 1314.5994 | 1345.6416 | 1328.6151 | 1327.6311      | 13 |
| 10 | 30.0338  | 971.5230  | 953.5125       | 999.5179  | 981.5074       |           |           | G    |           |           |           | 1244.5940 | 1227.5674 | 1226.5834      | 12 |
| 11 | 104.0528 | 1102.5635 | 1084.5530      | 1130.5584 | 1112.5479      | 1042.5601 |           | M    | 1111.5378 | 1110.5426 |           | 1187.5725 | 1170.5460 | 1169.5619      | 11 |
| 12 | 102.0550 | 1231.6061 | 1213.5955      | 1259.6010 | 1241.5905      | 1173.6006 |           | E    | 982.4952  | 981.5000  |           | 1056.5320 | 1039.5055 | 1038.5215      | 10 |
| 13 | 72.0808  | 1330.6745 | 1312.6640      | 1358.6694 | 1340.6589      | 1316.6589 |           | V    | 883.4268  | 896.4472  |           | 927.4894  | 910.4629  | 909.4789       | 9  |
| 14 | 44.0495  | 1401.7116 | 1383.7011      | 1429.7066 | 1411.6960      |           |           | A    | 812.3897  |           |           | 828.4210  | 811.3945  | 810.4104       | 8  |
| 15 | 102.0550 | 1530.7542 | 1512.7437      | 1558.7491 | 1540.7386      | 1472.7488 |           | E    | 683.3471  | 682.3519  |           | 757.3839  | 740.3573  | 739.3733       | 7  |
| 16 | 86.0964  | 1643.8383 | 1625.8277      | 1671.8332 | 1653.8226      | 1615.8070 | 1629.8226 | I    | 570.2631  | 583.2835  | 597.2991  | 628.3413  | 611.3148  | 610.3307       | 6  |
| 17 | 88.0393  | 1758.8652 | 1740.8547      | 1786.8602 | 1768.8496      | 1714.8754 |           | D    | 455.2361  | 454.2409  |           | 515.2572  | 498.2307  | 497.2467       | 5  |
| 18 | 30.0338  | 1815.8867 | 1797.8761      | 1843.8816 | 1825.8711      |           |           | G    |           |           |           | 400.2303  | 383.2037  |                | 4  |

|    |          |           |           |           |           |           |  |   |          |          |  |          |          |  |   |
|----|----------|-----------|-----------|-----------|-----------|-----------|--|---|----------|----------|--|----------|----------|--|---|
| 19 | 44.0495  | 1886.9238 | 1868.9133 | 1914.9187 | 1896.9082 |           |  | A | 327.1775 |          |  | 343.2088 | 326.1823 |  | 3 |
| 20 | 70.0651  | 1983.9766 | 1965.9660 | 2011.9715 | 1993.9609 | 1957.9609 |  | P | 230.1248 | 229.1295 |  | 272.1717 | 255.1452 |  | 2 |
| 21 | 129.1135 |           |           |           |           |           |  | R | 74.0237  | 73.0284  |  | 175.1190 | 158.0924 |  | 1 |

| Seq     | ya       | yb       | Seq     | ya       | yb       | Seq     | ya       | yb       |
|---------|----------|----------|---------|----------|----------|---------|----------|----------|
| VV      | 171.1492 | 199.1441 | VVP     | 268.2020 | 296.1969 | VVPG    | 325.2234 | 353.2183 |
| VVPGM   | 472.2588 | 500.2537 | VVPGMI  | 585.3429 | 613.3378 | VVPGMIV | 684.4113 | 712.4062 |
| VP      | 169.1335 | 197.1285 | VPG     | 226.1550 | 254.1499 | VPGM    | 373.1904 | 401.1853 |
| VPGMI   | 486.2745 | 514.2694 | VPGMIV  | 585.3429 | 613.3378 | VPGMIVT | 686.3906 | 714.3855 |
| PG      | 127.0866 | 155.0815 | PGM     | 274.1220 | 302.1169 | PGMI    | 387.2061 | 415.2010 |
| PGMIV   | 486.2745 | 514.2694 | PGMIVT  | 587.3221 | 615.3171 | PGMIVTG | 644.3436 | 672.3385 |
| GM      | 177.0692 | 205.0641 | GMI     | 290.1533 | 318.1482 | GMIV    | 389.2217 | 417.2166 |
| GMIVT   | 490.2694 | 518.2643 | GMIVTG  | 547.2908 | 575.2858 | GMIVTGM | 678.3313 | 706.3262 |
| MI      | 233.1318 | 261.1267 | MIV     | 332.2002 | 360.1952 | MIVT    | 433.2479 | 461.2428 |
| MIVTG   | 490.2694 | 518.2643 | MIVTGM  | 621.3099 | 649.3048 | IV      | 185.1648 | 213.1598 |
| IVT     | 286.2125 | 314.2074 | IVTG    | 343.2340 | 371.2289 | IVTGM   | 474.2745 | 502.2694 |
| IVTGME  | 603.3171 | 631.3120 | VT      | 173.1285 | 201.1234 | VTG     | 230.1499 | 258.1448 |
| VTGM    | 361.1904 | 389.1853 | VTGME   | 490.2330 | 518.2279 | VTGMEV  | 589.3014 | 617.2963 |
| VTGMEVA | 660.3385 | 688.3334 | TG      | 131.0815 | 159.0764 | TGM     | 262.1220 | 290.1169 |
| TGME    | 391.1646 | 419.1595 | TGMEV   | 490.2330 | 518.2279 | TGMEVA  | 561.2701 | 589.2650 |
| TGMEVAE | 690.3127 | 718.3076 | GM      | 161.0743 | 189.0692 | GME     | 290.1169 | 318.1118 |
| GMEV    | 389.1853 | 417.1802 | GMEVA   | 460.2224 | 488.2173 | GMEVAE  | 589.2650 | 617.2599 |
| ME      | 233.0954 | 261.0904 | MEV     | 332.1639 | 360.1588 | MEVA    | 403.2010 | 431.1959 |
| MEVAE   | 532.2436 | 560.2385 | MEVAEI  | 645.3276 | 673.3225 | EV      | 201.1234 | 229.1183 |
| EVA     | 272.1605 | 300.1554 | EVAE    | 401.2031 | 429.1980 | EVAEI   | 514.2871 | 542.2821 |
| EVAEID  | 629.3141 | 657.3090 | EVAEIDG | 686.3355 | 714.3305 | VA      | 143.1179 | 171.1128 |
| VAE     | 272.1605 | 300.1554 | VAEI    | 385.2445 | 413.2395 | VAEID   | 500.2715 | 528.2664 |
| VAEIDG  | 557.2930 | 585.2879 | VAEIDGA | 628.3301 | 656.3250 | AE      | 173.0921 | 201.0870 |
| AEI     | 286.1761 | 314.1710 | AEID    | 401.2031 | 429.1980 | AEIDG   | 458.2245 | 486.2195 |
| AEIDGA  | 529.2617 | 557.2566 | AEIDGAP | 626.3144 | 654.3093 | EI      | 215.1390 | 243.1339 |
| EID     | 330.1660 | 358.1609 | EIDG    | 387.1874 | 415.1823 | EIDGA   | 458.2245 | 486.2195 |
| EIDGAP  | 555.2773 | 583.2722 | ID      | 201.1234 | 229.1183 | IDG     | 258.1448 | 286.1397 |
| IDGA    | 329.1819 | 357.1769 | IDGAP   | 426.2347 | 454.2296 | DG      | 145.0608 | 173.0557 |
| DGA     | 216.0979 | 244.0928 | DGAP    | 313.1506 | 341.1456 | GA      | 101.0709 | 129.0659 |
| GAP     | 198.1237 | 226.1186 | AP      | 141.1022 | 169.0972 |         |          |          |

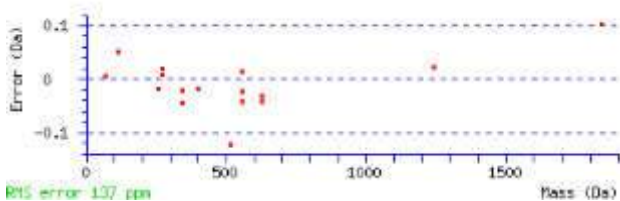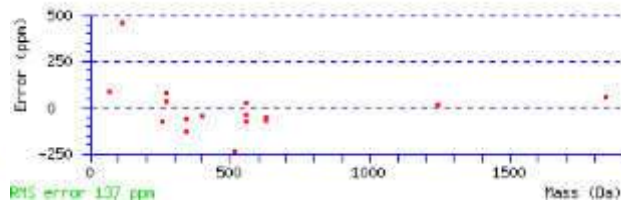

NCBI BLAST search of [EVVPGMIVTGMEVAEIDGAPR](#)  
 (Parameters: blastp, nr protein database, expect=20000, no filter, PAM30)  
 Other BLAST [web gateways](#)

All matches to this query

| Score | M <sub>r</sub> (calc) | Delta  | Sequence                              |
|-------|-----------------------|--------|---------------------------------------|
| 21.5  | 2185.0759             | 0.1187 | <a href="#">EVVPGMIVTGMEVAEIDGAPR</a> |
| 20.4  | 2185.0759             | 0.1187 | <a href="#">EVVPGMIVTGMEVAEIDGAPR</a> |
| 12.8  | 2185.0345             | 0.1601 | <a href="#">FMAVPHYTYIMMKMPGPR</a>    |
| 11.8  | 2185.0345             | 0.1601 | <a href="#">FMAVPHYTYMIMMKMPGPR</a>   |
| 11.6  | 2185.0797             | 0.1149 | <a href="#">GDLNNNOVGEAMERVLALDK</a>  |

|      |           |        |                                         |
|------|-----------|--------|-----------------------------------------|
| 10.1 | 2185.1703 | 0.0243 | <a href="#">VSVGVGGLTNNNGGISDGITKK</a>  |
| 10.1 | 2185.1703 | 0.0243 | <a href="#">VSVGVGGLTNNNGGLSDGITKK</a>  |
| 9.9  | 2185.1242 | 0.0705 | <a href="#">VWLNPTGTIEMLLWQGPSK</a>     |
| 9.4  | 2185.1024 | 0.0923 | <a href="#">SLLNLMGVKDNSPMFAPAHK</a>    |
| 9.3  | 2185.0838 | 0.1109 | <a href="#">DGILGTAGAPIHMVAASEGGSEK</a> |

Mascot: <http://www.matrixscience.com/>

**MATRIX SCIENCE Mascot Search Results**

**Peptide View Spot no 16**

**MS/MS Fragmentation of SDVVIETHKEDDLI**

Found in **gi18698985** in **NCBI**nr, anti-disease protein 1 [Oryza sativa]

Match to Query 11: 1611.876224 from(1612.883500,1+) intensity(0.0000) index(5)

Title: Label: L7, Spot\_Id: 219781, Peak\_List\_Id: 226463, MSMS Job\_Run\_Id: 21845, Comment:

Data file C:\Documents and Settings\Administrator\Desktop\Farah-Garima 11May 2013\ppw\_L7\_136859918200.txt

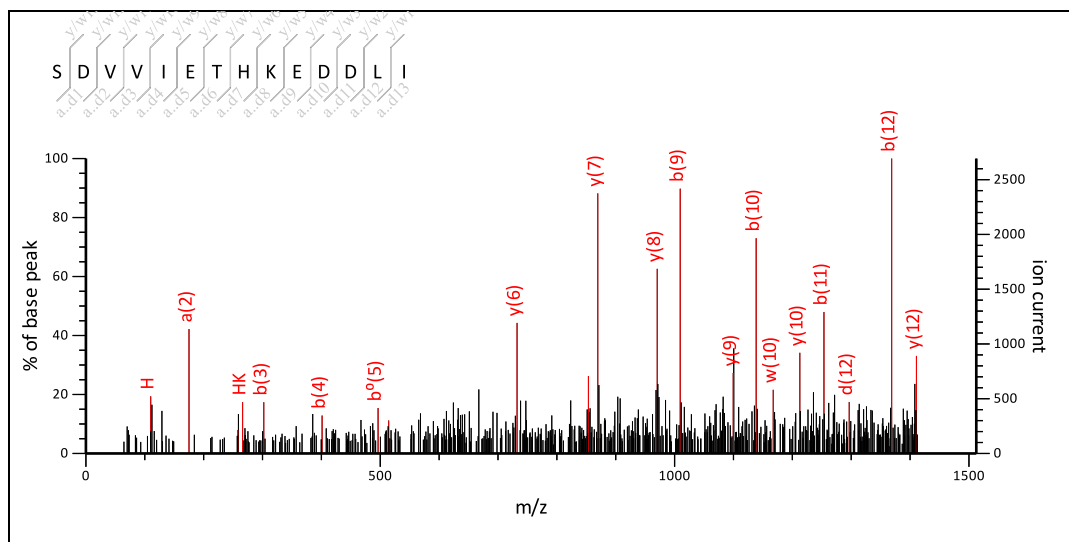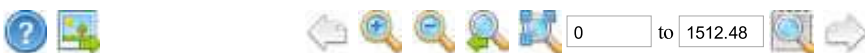

Label all possible matches  Label matches used for scoring

Monoisotopic mass of neutral peptide Mr(calc): 1611.7992

Fixed modifications: Carbamidomethyl (C) (apply to specified residues or termini only)

Ions Score: 45 Expect: 0.99

Matches : 24/231 fragment ions using 42 most intense peaks ([help](#))

| #  | Immon.          | a               | a*        | a <sup>0</sup> | b                | b*        | b <sup>0</sup>  | d                | d'       | Seq. | v         | w                | w'        | y                | y*        |
|----|-----------------|-----------------|-----------|----------------|------------------|-----------|-----------------|------------------|----------|------|-----------|------------------|-----------|------------------|-----------|
| 1  | 60.0444         | 60.0444         |           | 42.0338        | 88.0393          |           | 70.0287         | 44.0495          |          | S    |           |                  |           |                  |           |
| 2  | 88.0393         | <b>175.0713</b> |           | 157.0608       | 203.0662         |           | 185.0557        | 131.0815         |          | D    | 1465.7533 | 1464.7581        |           | 1525.7744        | 1508.7479 |
| 3  | 72.0808         | 274.1397        |           | 256.1292       | <b>302.1347</b>  |           | 284.1241        | 260.1241         |          | V    | 1366.6849 | 1379.7053        |           | <b>1410.7475</b> | 1393.7209 |
| 4  | 72.0808         | 373.2082        |           | 355.1976       | <b>401.2031</b>  |           | 383.1925        | 359.1925         |          | V    | 1267.6165 | 1280.6369        |           | 1311.6791        | 1294.6525 |
| 5  | 86.0964         | 486.2922        |           | 468.2817       | <b>514.2871</b>  |           | <b>496.2766</b> | 458.2609         | 472.2766 | I    | 1154.5324 | <b>1167.5528</b> | 1181.5685 | <b>1212.6107</b> | 1195.5841 |
| 6  | 102.0550        | 615.3348        |           | 597.3243       | 643.3297         |           | 625.3192        | 557.3293         |          | E    | 1025.4898 | 1024.4946        |           | <b>1099.5266</b> | 1082.5000 |
| 7  | 74.0600         | 716.3825        |           | 698.3719       | 744.3774         |           | 726.3668        | 700.3876         | 702.3668 | T    | 924.4421  | 937.4625         | 939.4418  | <b>970.4840</b>  | 953.4575  |
| 8  | <b>110.0713</b> | <b>853.4414</b> |           | 835.4308       | 881.4363         |           | 863.4258        |                  |          | H    | 787.3832  |                  |           | <b>869.4363</b>  | 852.4098  |
| 9  | 101.1073        | 981.5364        | 964.5098  | 963.5258       | <b>1009.5313</b> | 992.5047  | 991.5207        | 924.4785         |          | K    | 659.2883  | 658.2930         |           | <b>732.3774</b>  | 715.3509  |
| 10 | 102.0550        | 1110.5790       | 1093.5524 | 1092.5684      | <b>1138.5739</b> | 1121.5473 | 1120.5633       | 1052.5735        |          | E    | 530.2457  | 529.2504         |           | 604.2824         |           |
| 11 | 88.0393         | 1225.6059       | 1208.5794 | 1207.5953      | <b>1253.6008</b> | 1236.5743 | 1235.5903       | 1181.6161        |          | D    | 415.2187  | 414.2235         |           | 475.2399         |           |
| 12 | 88.0393         | 1340.6329       | 1323.6063 | 1322.6223      | <b>1368.6278</b> | 1351.6012 | 1350.6172       | <b>1296.6430</b> |          | D    | 300.1918  | 299.1965         |           | 360.2129         |           |
| 13 | 86.0964         | 1453.7169       | 1436.6904 | 1435.7063      | 1481.7118        | 1464.6853 | 1463.7013       | 1411.6700        |          | L    | 187.1077  | 186.1125         |           | 245.1860         |           |
| 14 | 86.0964         |                 |           |                |                  |           |                 |                  |          | I    | 74.0237   | 73.0284          |           | 132.1019         |           |

| Seq    | ya       | yb       | Seq    | ya       | yb       | Seq    | ya              | yb       |
|--------|----------|----------|--------|----------|----------|--------|-----------------|----------|
| DV     | 187.1077 | 215.1026 | DVV    | 286.1761 | 314.1710 | DVVI   | 399.2602        | 427.2551 |
| DVVI   | 528.3028 | 556.2977 | DVVIET | 629.3505 | 657.3454 | VV     | 171.1492        | 199.1441 |
| VVI    | 284.2333 | 312.2282 | VVIE   | 413.2758 | 441.2708 | VVIET  | <b>514.3235</b> | 542.3184 |
| VVIETH | 651.3824 | 679.3774 | VI     | 185.1648 | 213.1598 | VIE    | 314.2074        | 342.2023 |
| VIET   | 415.2551 | 443.2500 | VIETH  | 552.3140 | 580.3089 | VIETHK | 680.4090        | 708.4039 |
| IE     | 215.1390 | 243.1339 | IET    | 316.1867 | 344.1816 | IETH   | 453.2456        | 481.2405 |
| IETHK  | 581.3406 | 609.3355 | ET     | 203.1026 | 231.0975 | ETH    | 340.1615        | 368.1565 |

|               |          |                 |              |          |                 |              |          |                 |
|---------------|----------|-----------------|--------------|----------|-----------------|--------------|----------|-----------------|
| <b>ETHK</b>   | 468.2565 | <b>496.2514</b> | <b>ETHKE</b> | 597.2991 | 625.2940        | <b>TH</b>    | 211.1190 | 239.1139        |
| <b>THK</b>    | 339.2139 | 367.2088        | <b>THKE</b>  | 468.2565 | <b>496.2514</b> | <b>THKED</b> | 583.2835 | 611.2784        |
| <b>THKEDD</b> | 698.3104 | 726.3053        | <b>HK</b>    | 238.1662 | <b>266.1612</b> | <b>HKE</b>   | 367.2088 | 395.2037        |
| <b>HKED</b>   | 482.2358 | 510.2307        | <b>HKEDD</b> | 597.2627 | 625.2576        | <b>KE</b>    | 230.1499 | <b>258.1448</b> |
| <b>KED</b>    | 345.1769 | 373.1718        | <b>KEDD</b>  | 460.2038 | 488.1987        | <b>KEDDL</b> | 573.2879 | 601.2828        |
| <b>ED</b>     | 217.0819 | 245.0768        | <b>EDD</b>   | 332.1088 | 360.1038        | <b>EDDL</b>  | 445.1929 | 473.1878        |
| <b>DD</b>     | 203.0662 | 231.0612        | <b>DDL</b>   | 316.1503 | 344.1452        | <b>DL</b>    | 201.1234 | 229.1183        |

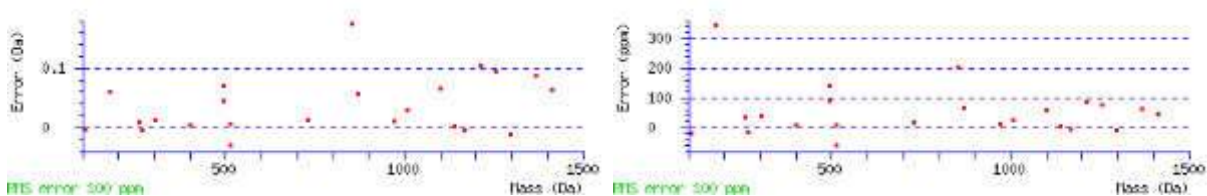

NCBI **BLAST** search of [SDVVIETHKEDDLI](#)

(Parameters: blastp, nr protein database, expect=20000, no filter, PAM30)

Other BLAST [web gateways](#)

#### All matches to this query

| Score | Mr(calc)  | Delta   | Sequence                         |
|-------|-----------|---------|----------------------------------|
| 44.6  | 1611.7992 | 0.0770  | <a href="#">SDVVIETHKEDDLI</a>   |
| 27.9  | 1611.8216 | 0.0546  | <a href="#">AEVTIEGTTSAGALHR</a> |
| 20.9  | 1611.8580 | 0.0182  | <a href="#">NNATLLDGSTGALLPR</a> |
| 20.6  | 1611.8733 | 0.0029  | <a href="#">ERVLAAFPGLGETPR</a>  |
| 18.6  | 1611.8481 | 0.0281  | <a href="#">ROSDTGVHYALPLR</a>   |
| 18.4  | 1611.7781 | 0.0982  | <a href="#">DEDDVLGSFSLIR</a>    |
| 18.3  | 1611.8766 | -0.0004 | <a href="#">AMPLTAGQEVKALOR</a>  |
| 17.6  | 1611.7311 | 0.1451  | <a href="#">GEILEHNPMASENK</a>   |
| 17.5  | 1611.8832 | -0.0069 | <a href="#">LDATIETLPDLQKR</a>   |
| 17.4  | 1611.9195 | -0.0433 | <a href="#">ELGITEDKVNILR</a>    |

Mascot: <http://www.matrixscience.com/>

**MATRIX SCIENCE Mascot Search Results**

**Peptide View Spot no 16**

MS/MS Fragmentation of **VVSGEIDQSDQSFLLDDQVAAGWVLTCHAYPK**

Found in **gi|18698985** in **NCBI**nr, anti-disease protein 1 [Oryza sativa]

Match to Query 19: 3549.797124 from(3550.804400,1+) intensity(0.0000) index(9)

Title: Label: L7, Spot\_Id: 219781, Peak\_List\_Id: 226457, MSMS Job\_Run\_Id: 21845, Comment:

Data file C:\Documents and Settings\Administrator\Desktop\Farah-Garima 11May 2013\ppw\_L7\_136859918200.txt

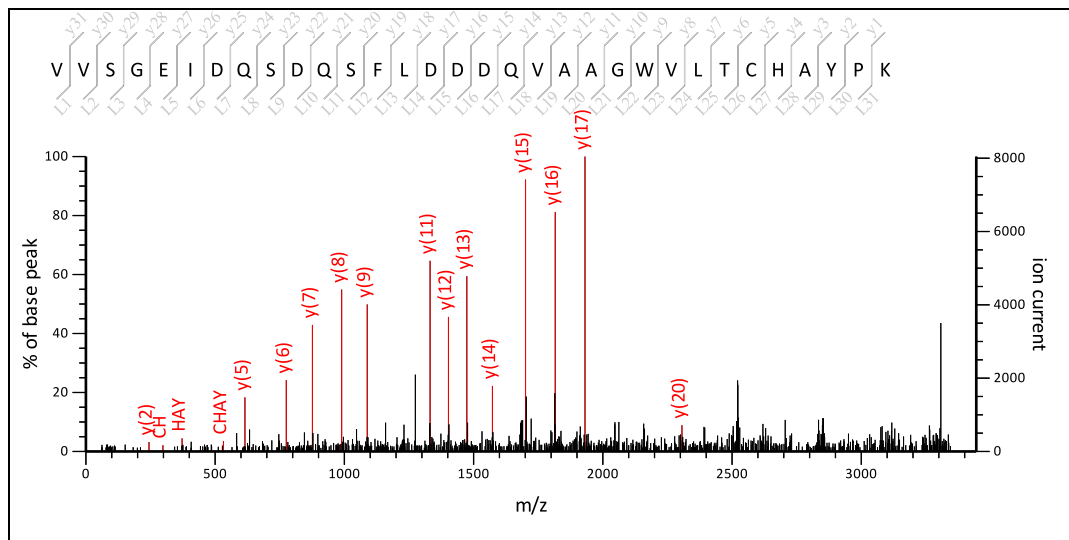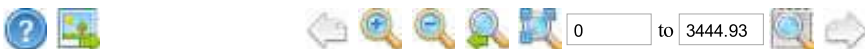

Label all possible matches  Label matches used for scoring

Monoisotopic mass of neutral peptide Mr(calc): 3549.6359

Fixed modifications: Carbamidomethyl (C) (apply to specified residues or termini only)

Ions Score: 78 Expect: 0.00017

Matches : 22/632 fragment ions using 33 most intense peaks [\(help\)](#)

| #  | Immon.   | a         | a*        | a <sup>0</sup> | b         | b*        | b <sup>0</sup> | d         | d'       | Seq. | v         | w         | w'        | y                | y*        |
|----|----------|-----------|-----------|----------------|-----------|-----------|----------------|-----------|----------|------|-----------|-----------|-----------|------------------|-----------|
| 1  | 72.0808  | 72.0808   |           |                | 100.0757  |           |                | 44.0495   |          | V    |           |           |           |                  |           |
| 2  | 72.0808  | 171.1492  |           |                | 199.1441  |           |                | 157.1335  |          | V    | 3407.5121 | 3420.5325 |           | 3451.5747        | 3434.5481 |
| 3  | 60.0444  | 258.1812  |           | 240.1707       | 286.1761  |           | 268.1656       | 242.1863  |          | S    | 3320.4801 | 3319.4848 |           | 3352.5063        | 3335.4797 |
| 4  | 30.0338  | 315.2027  |           | 297.1921       | 343.1976  |           | 325.1870       |           |          | G    |           |           |           | 3265.4743        | 3248.4477 |
| 5  | 102.0550 | 444.2453  |           | 426.2347       | 472.2402  |           | 454.2296       | 386.2398  |          | E    | 3134.4160 | 3133.4208 |           | 3208.4528        | 3191.4262 |
| 6  | 86.0964  | 557.3293  |           | 539.3188       | 585.3243  |           | 567.3137       | 529.2980  | 543.3137 | I    | 3021.3319 | 3034.3523 | 3048.3680 | 3079.4102        | 3062.3836 |
| 7  | 88.0393  | 672.3563  |           | 654.3457       | 700.3512  |           | 682.3406       | 628.3665  |          | D    | 2906.3050 | 2905.3098 |           | 2966.3261        | 2949.2996 |
| 8  | 101.0709 | 800.4149  | 783.3883  | 782.4043       | 828.4098  | 811.3832  | 810.3992       | 743.3934  |          | Q    | 2778.2464 | 2777.2512 |           | 2851.2992        | 2834.2726 |
| 9  | 60.0444  | 887.4469  | 870.4203  | 869.4363       | 915.4418  | 898.4153  | 897.4312       | 871.4520  |          | S    | 2691.2144 | 2690.2191 |           | 2723.2406        | 2706.2141 |
| 10 | 88.0393  | 1002.4738 | 985.4473  | 984.4633       | 1030.4687 | 1013.4422 | 1012.4582      | 958.4840  |          | D    | 2576.1875 | 2575.1922 |           | 2636.2086        | 2619.1820 |
| 11 | 101.0709 | 1130.5324 | 1113.5059 | 1112.5218      | 1158.5273 | 1141.5008 | 1140.5168      | 1073.5109 |          | Q    | 2448.1289 | 2447.1336 |           | 2521.1816        | 2504.1551 |
| 12 | 60.0444  | 1217.5644 | 1200.5379 | 1199.5539      | 1245.5594 | 1228.5328 | 1227.5488      | 1201.5695 |          | S    | 2361.0968 | 2360.1016 |           | 2393.1231        | 2376.0965 |
| 13 | 120.0808 | 1364.6329 | 1347.6063 | 1346.6223      | 1392.6278 | 1375.6012 | 1374.6172      |           |          | F    | 2214.0284 |           |           | <b>2306.0910</b> | 2289.0645 |
| 14 | 86.0964  | 1477.7169 | 1460.6904 | 1459.7063      | 1505.7118 | 1488.6853 | 1487.7013      | 1435.6700 |          | L    | 2100.9444 | 2099.9491 |           | 2159.0226        | 2141.9961 |
| 15 | 88.0393  | 1592.7439 | 1575.7173 | 1574.7333      | 1620.7388 | 1603.7122 | 1602.7282      | 1548.7540 |          | D    | 1985.9174 | 1984.9222 |           | 2045.9386        | 2028.9120 |
| 16 | 88.0393  | 1707.7708 | 1690.7443 | 1689.7602      | 1735.7657 | 1718.7392 | 1717.7552      | 1663.7810 |          | D    | 1870.8905 | 1869.8952 |           | <b>1930.9116</b> | 1913.8851 |
| 17 | 88.0393  | 1822.7977 | 1805.7712 | 1804.7872      | 1850.7927 | 1833.7661 | 1832.7821      | 1778.8079 |          | D    | 1755.8635 | 1754.8683 |           | <b>1815.8847</b> | 1798.8581 |
| 18 | 101.0709 | 1950.8563 | 1933.8298 | 1932.8458      | 1978.8512 | 1961.8247 | 1960.8407      | 1893.8349 |          | Q    | 1627.8050 | 1626.8097 |           | <b>1700.8577</b> | 1683.8312 |
| 19 | 72.0808  | 2049.9247 | 2032.8982 | 2031.9142      | 2077.9196 | 2060.8931 | 2059.9091      | 2035.9091 |          | V    | 1528.7365 | 1541.7569 |           | <b>1572.7991</b> | 1555.7726 |
| 20 | 44.0495  | 2120.9618 | 2103.9353 | 2102.9513      | 2148.9568 | 2131.9302 | 2130.9462      |           |          | A    | 1457.6994 |           |           | <b>1473.7307</b> | 1456.7042 |
| 21 | 44.0495  | 2191.9990 | 2174.9724 | 2173.9884      | 2219.9939 | 2202.9673 | 2201.9833      |           |          | A    | 1386.6623 |           |           | <b>1402.6936</b> | 1385.6671 |
| 22 | 30.0338  | 2249.0204 | 2231.9939 | 2231.0099      | 2277.0153 | 2259.9888 | 2259.0048      |           |          | G    |           |           |           | <b>1331.6565</b> | 1314.6300 |
| 23 | 159.0917 | 2435.0997 | 2418.0732 | 2417.0892      | 2463.0947 | 2446.0681 | 2445.0841      |           |          | W    | 1143.5615 |           |           | 1274.6350        | 1257.6085 |



|    |          |           |           |           |           |           |           |           |           |   |           |           |          |           |           |
|----|----------|-----------|-----------|-----------|-----------|-----------|-----------|-----------|-----------|---|-----------|-----------|----------|-----------|-----------|
| 24 | 72.0808  | 2534.1682 | 2517.1416 | 2516.1576 | 2562.1631 | 2545.1365 | 2544.1525 | 2520.1525 |           | V | 1044.4931 | 1057.5135 |          | 1088.5557 | 1071.5292 |
| 25 | 86.0964  | 2647.2522 | 2630.2257 | 2629.2417 | 2675.2471 | 2658.2206 | 2657.2366 | 2605.2053 |           | L | 931.4091  | 930.4138  |          | 989.4873  | 972.4608  |
| 26 | 74.0600  | 2748.2999 | 2731.2733 | 2730.2893 | 2776.2948 | 2759.2683 | 2758.2842 | 2732.3050 | 2734.2842 | T | 830.3614  | 843.3818  | 845.3611 | 876.4033  | 859.3767  |
| 27 | 133.0430 | 2908.3305 | 2891.3040 | 2890.3200 | 2936.3255 | 2919.2989 | 2918.3149 | 2819.3370 |           | C | 670.3307  | 669.3355  |          | 775.3556  | 758.3290  |
| 28 | 110.0713 | 3045.3895 | 3028.3629 | 3027.3789 | 3073.3844 | 3056.3578 | 3055.3738 |           |           | H | 533.2718  |           |          | 615.3249  | 598.2984  |
| 29 | 44.0495  | 3116.4266 | 3099.4000 | 3098.4160 | 3144.4215 | 3127.3949 | 3126.4109 |           |           | A | 462.2347  |           |          | 478.2660  | 461.2395  |
| 30 | 136.0757 | 3279.4899 | 3262.4634 | 3261.4793 | 3307.4848 | 3290.4583 | 3289.4743 |           |           | Y | 299.1714  |           |          | 407.2289  | 390.2023  |
| 31 | 70.0651  | 3376.5427 | 3359.5161 | 3358.5321 | 3404.5376 | 3387.5110 | 3386.5270 | 3350.5270 |           | P | 202.1186  | 201.1234  |          | 244.1656  | 227.1390  |
| 32 | 101.1073 |           |           |           |           |           |           |           |           | K | 74.0237   | 73.0284   |          | 147.1128  | 130.0863  |

| Seq     | ya       | yb       | Seq     | ya       | yb       | Seq    | ya       | yb       |
|---------|----------|----------|---------|----------|----------|--------|----------|----------|
| VS      | 159.1128 | 187.1077 | VSG     | 216.1343 | 244.1292 | VSGE   | 345.1769 | 373.1718 |
| VSGEI   | 458.2609 | 486.2558 | VSGEID  | 573.2879 | 601.2828 | SG     | 117.0659 | 145.0608 |
| SGE     | 246.1084 | 274.1034 | SGEI    | 359.1925 | 387.1874 | SGEID  | 474.2195 | 502.2144 |
| SGEIDQ  | 602.2780 | 630.2729 | SGEIDQS | 689.3101 | 717.3050 | GE     | 159.0764 | 187.0713 |
| GEI     | 272.1605 | 300.1554 | GEID    | 387.1874 | 415.1823 | GEIDQ  | 515.2460 | 543.2409 |
| GEIDQS  | 602.2780 | 630.2729 | EI      | 215.1390 | 243.1339 | EID    | 330.1660 | 358.1609 |
| EIDQ    | 458.2245 | 486.2195 | EIDQS   | 545.2566 | 573.2515 | EIDQSD | 660.2835 | 688.2784 |
| ID      | 201.1234 | 229.1183 | IDQ     | 329.1819 | 357.1769 | IDQS   | 416.2140 | 444.2089 |
| IDQSD   | 531.2409 | 559.2358 | IDQSDQ  | 659.2995 | 687.2944 | DQ     | 216.0979 | 244.0928 |
| DQS     | 303.1299 | 331.1248 | DQSD    | 418.1569 | 446.1518 | DQSDQ  | 546.2154 | 574.2103 |
| DQSDQS  | 633.2475 | 661.2424 | QS      | 188.1030 | 216.0979 | QSD    | 303.1299 | 331.1248 |
| QSDQ    | 431.1885 | 459.1834 | QSDQS   | 518.2205 | 546.2154 | QSDQSF | 665.2889 | 693.2838 |
| SD      | 175.0713 | 203.0662 | SDQ     | 303.1299 | 331.1248 | SDQS   | 390.1619 | 418.1569 |
| SDQSF   | 537.2304 | 565.2253 | SDQSFL  | 650.3144 | 678.3093 | DQ     | 216.0979 | 244.0928 |
| DQS     | 303.1299 | 331.1248 | DQSF    | 450.1983 | 478.1932 | DQSFL  | 563.2824 | 591.2773 |
| DQSFLD  | 678.3093 | 706.3042 | QS      | 188.1030 | 216.0979 | QSF    | 335.1714 | 363.1663 |
| QSFL    | 448.2554 | 476.2504 | QSFLD   | 563.2824 | 591.2773 | QSFLDD | 678.3093 | 706.3042 |
| SF      | 207.1128 | 235.1077 | SFL     | 320.1969 | 348.1918 | SFLD   | 435.2238 | 463.2187 |
| SFLDD   | 550.2508 | 578.2457 | SFLDDD  | 665.2777 | 693.2726 | FL     | 233.1648 | 261.1598 |
| FLD     | 348.1918 | 376.1867 | FLDD    | 463.2187 | 491.2136 | FLDDD  | 578.2457 | 606.2406 |
| LD      | 201.1234 | 229.1183 | LDD     | 316.1503 | 344.1452 | LDDD   | 431.1773 | 459.1722 |
| LDDDQ   | 559.2358 | 587.2307 | LDDDQV  | 658.3042 | 686.2992 | DD     | 203.0662 | 231.0612 |
| DDD     | 318.0932 | 346.0881 | DDDQ    | 446.1518 | 474.1467 | DDDQV  | 545.2202 | 573.2151 |
| DDDQVA  | 616.2573 | 644.2522 | DDDQVAA | 687.2944 | 715.2893 | DD     | 203.0662 | 231.0612 |
| DDQ     | 331.1248 | 359.1197 | DDQV    | 430.1932 | 458.1882 | DDQVA  | 501.2304 | 529.2253 |
| DDQVAA  | 572.2675 | 600.2624 | DDQVAAG | 629.2889 | 657.2838 | DQ     | 216.0979 | 244.0928 |
| DQV     | 315.1663 | 343.1612 | DQVA    | 386.2034 | 414.1983 | DQVAA  | 457.2405 | 485.2354 |
| DQVAAG  | 514.2620 | 542.2569 | QV      | 200.1394 | 228.1343 | QVA    | 271.1765 | 299.1714 |
| QVAA    | 342.2136 | 370.2085 | QVAAG   | 399.2350 | 427.2300 | QVAAGW | 585.3144 | 613.3093 |
| QVAAGWV | 684.3828 | 712.3777 | VA      | 143.1179 | 171.1128 | VAA    | 214.1550 | 242.1499 |
| VAAG    | 271.1765 | 299.1714 | VAAGW   | 457.2558 | 485.2507 | VAAGWV | 556.3242 | 584.3191 |
| VAAGWVL | 669.4083 | 697.4032 | AA      | 115.0866 | 143.0815 | AAG    | 172.1081 | 200.1030 |
| AAGW    | 358.1874 | 386.1823 | AAGWV   | 457.2558 | 485.2507 | AAGWVL | 570.3398 | 598.3348 |
| AAGWVLT | 671.3875 | 699.3824 | AG      | 101.0709 | 129.0659 | AGW    | 287.1503 | 315.1452 |
| AGWV    | 386.2187 | 414.2136 | AGWVL   | 499.3027 | 527.2976 | AGWVLT | 600.3504 | 628.3453 |
| GW      | 216.1131 | 244.1081 | GWV     | 315.1816 | 343.1765 | GWVL   | 428.2656 | 456.2605 |
| GWVLT   | 529.3133 | 557.3082 | GWVLT   | 689.3439 | 717.3389 | WV     | 258.1601 | 286.1550 |
| WVL     | 371.2442 | 399.2391 | WVLT    | 472.2918 | 500.2867 | WVLT   | 632.3225 | 660.3174 |
| VL      | 185.1648 | 213.1598 | VLT     | 286.2125 | 314.2074 | VLTC   | 446.2432 | 474.2381 |
| VLTC    | 583.3021 | 611.2970 | VLTCH   | 654.3392 | 682.3341 | LT     | 187.1441 | 215.1390 |
| LTC     | 347.1748 | 375.1697 | LTCH    | 484.2337 | 512.2286 | LTCH   | 555.2708 | 583.2657 |
| TC      | 234.0907 | 262.0856 | TCH     | 371.1496 | 399.1445 | TCH    | 442.1867 | 470.1816 |
| TCHAY   | 605.2500 | 633.2450 | CH      | 270.1019 | 298.0968 | CHA    | 341.1390 | 369.1340 |
| CHAY    | 504.2024 | 532.1973 | CHAYP   | 601.2551 | 629.2500 | HA     | 181.1084 | 209.1033 |



|                     |          |                          |                      |          |          |                    |          |          |
|---------------------|----------|--------------------------|----------------------|----------|----------|--------------------|----------|----------|
| <a href="#">HAY</a> | 344.1717 | <a href="#">372.1666</a> | <a href="#">HAYP</a> | 441.2245 | 469.2194 | <a href="#">AY</a> | 207.1128 | 235.1077 |
| <a href="#">AYP</a> | 304.1656 | 332.1605                 | <a href="#">YP</a>   | 233.1285 | 261.1234 |                    |          |          |

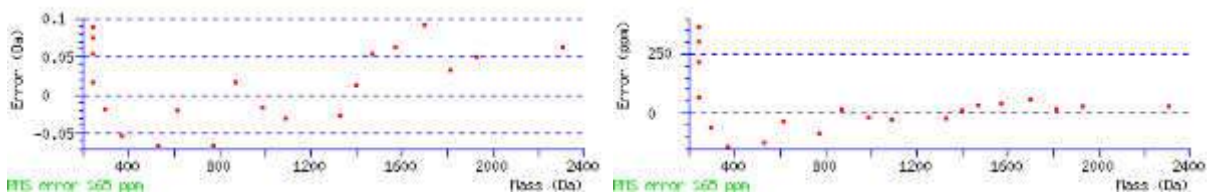

NCBI **BLAST** search of [VVSGEIDQSDQSFLLDDDOVAAGWVLTCHAYPK](#)

(Parameters: blastp, nr protein database, expect=20000, no filter, PAM30)

Other BLAST [web gateways](#)

#### All matches to this query

| Score | Mr(calc)  | Delta   | Sequence                                               |
|-------|-----------|---------|--------------------------------------------------------|
| 78.3  | 3549.6359 | 0.1613  | <a href="#">VVSGEIDQSDQSFLLDDDOVAAGWVLTCHAYPK</a>      |
| 14.5  | 3549.7774 | 0.0197  | <a href="#">SWNRRTVTAVTAAAAVVVACGVTGFLGDDGDDK</a>      |
| 6.1   | 3549.9177 | -0.1206 | <a href="#">GWRWLFIIEGAATVGFIIISLFILPDFPGTSR</a>       |
| 5.9   | 3549.7912 | 0.0059  | <a href="#">EEIKPEDVSAEVVEKEYQVOLDIAMOSGKPK</a>        |
| 5.7   | 3549.7005 | 0.0966  | <a href="#">AATTTAAAVGATTTAAAAGPESTAPDMHQATGPPLSER</a> |
| 5.4   | 3549.9489 | -0.1518 | <a href="#">MGFLLLLGGVVGTLGVOLIMVLRAMGNADFVIK</a>      |
| 4.5   | 3549.8103 | -0.0132 | <a href="#">KDFIDALHNATSEEHVVELVNTVIHPAPETPK</a>       |
| 4.0   | 3549.8081 | -0.0109 | <a href="#">SVLIMAHRPAAIAECDMLLVLDHGVRFMAFGPK</a>      |
| 3.8   | 3549.8640 | -0.0669 | <a href="#">MLLSALSAVLSLAGSAAAALTYKGVWSSVPVEEK</a>     |
| 3.5   | 3549.5525 | 0.2446  | <a href="#">GGNGGGIEACSSAAAAAAVRDACETFAEAFETER</a>     |

Mascot: <http://www.matrixscience.com/>

**MATRIX SCIENCE Mascot Search Results**

**Peptide View Spot no 17**

MS/MS Fragmentation of **VNYAGVSTNNYALDEIQEVK**

Found in **gi34394725** in **NCBIInr**, putative Photosystem I reaction center subunit IV [Oryza sativa Japonica Group]

Match to Query 23: 2226.235424 from(2227.242700,1+) intensity(0.0000) index(9)

Title: Label: O9, Spot\_Id: 228984, Peak\_List\_Id: 257934, MSMS Job\_Run\_Id: 24944, Comment:

Data file ppw\_O9\_138985154400.txt

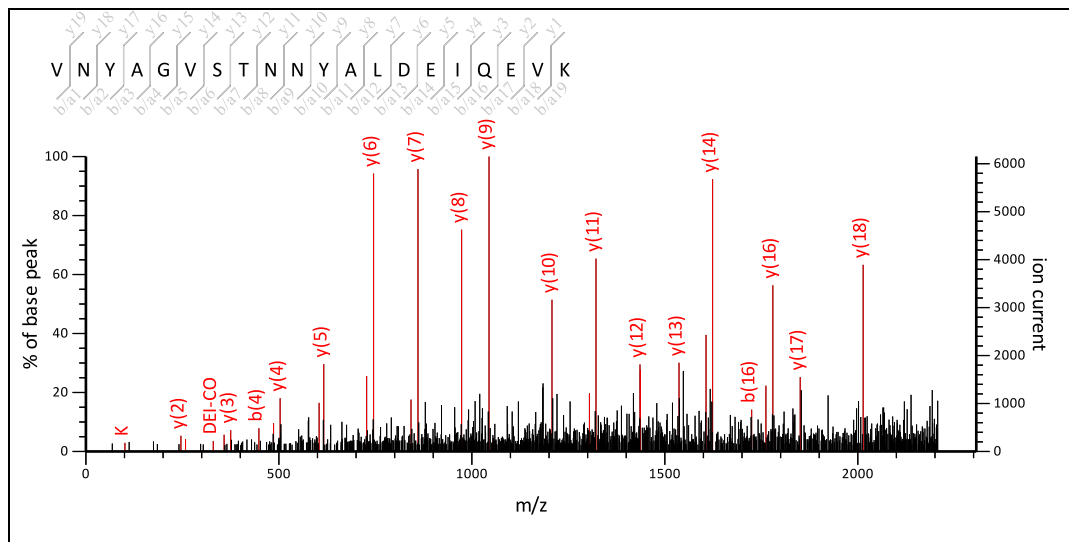

Navigation icons: Home, Back, Forward, Search, etc. Range: 0 to 2307.02

Label all possible matches  Label matches used for scoring

Monoisotopic mass of neutral peptide Mr(calc): 2226.0804

Fixed modifications: Carbamidomethyl (C) (apply to specified residues or termini only)

Ions Score: 128 Expect: 2.3e-10

Matches : 40/376 fragment ions using 44 most intense peaks (help)

| #  | Immon.   | a         | a*        | a <sup>0</sup> | b         | b*        | b <sup>0</sup> | d         | d'        | Seq. | v         | w         | w'        | y         | y*        |
|----|----------|-----------|-----------|----------------|-----------|-----------|----------------|-----------|-----------|------|-----------|-----------|-----------|-----------|-----------|
| 1  | 72.0808  | 72.0808   |           |                | 100.0757  |           |                | 44.0495   |           | V    |           |           |           |           |           |
| 2  | 87.0553  | 186.1237  | 169.0972  |                | 214.1186  | 197.0921  |                | 143.1179  |           | N    | 2068.9822 | 2067.9869 |           | 2128.0193 | 2110.9928 |
| 3  | 136.0757 | 349.1870  | 332.1605  |                | 377.1819  | 360.1554  |                |           |           | Y    | 1905.9189 |           |           | 2013.9764 | 1996.9498 |
| 4  | 44.0495  | 420.2241  | 403.1976  |                | 448.2191  | 431.1925  |                |           |           | A    | 1834.8817 |           |           | 1850.9130 | 1833.8865 |
| 5  | 30.0338  | 477.2456  | 460.2191  |                | 505.2405  | 488.2140  |                |           |           | G    |           |           |           | 1779.8759 | 1762.8494 |
| 6  | 72.0808  | 576.3140  | 559.2875  |                | 604.3089  | 587.2824  |                | 562.2984  |           | V    | 1678.7919 | 1691.8123 |           | 1722.8545 | 1705.8279 |
| 7  | 60.0444  | 663.3461  | 646.3195  | 645.3355       | 691.3410  | 674.3144  | 673.3304       | 647.3511  |           | S    | 1591.7598 | 1590.7646 |           | 1623.7861 | 1606.7595 |
| 8  | 74.0600  | 764.3937  | 747.3672  | 746.3832       | 792.3886  | 775.3621  | 774.3781       | 748.3988  | 750.3781  | T    | 1490.7122 | 1503.7326 | 1505.7118 | 1536.7540 | 1519.7275 |
| 9  | 87.0553  | 878.4367  | 861.4101  | 860.4261       | 906.4316  | 889.4050  | 888.4210       | 835.4308  |           | N    | 1376.6692 | 1375.6740 |           | 1435.7063 | 1418.6798 |
| 10 | 87.0553  | 992.4796  | 975.4530  | 974.4690       | 1020.4745 | 1003.4479 | 1002.4639      | 949.4738  |           | N    | 1262.6263 | 1261.6311 |           | 1321.6634 | 1304.6369 |
| 11 | 136.0757 | 1155.5429 | 1138.5164 | 1137.5323      | 1183.5378 | 1166.5113 | 1165.5273      |           |           | Y    | 1099.5630 |           |           | 1207.6205 | 1190.5939 |
| 12 | 44.0495  | 1226.5800 | 1209.5535 | 1208.5695      | 1254.5749 | 1237.5484 | 1236.5644      |           |           | A    | 1028.5259 |           |           | 1044.5572 | 1027.5306 |
| 13 | 86.0964  | 1339.6641 | 1322.6375 | 1321.6535      | 1367.6590 | 1350.6325 | 1349.6484      | 1297.6171 |           | L    | 915.4418  | 914.4466  |           | 973.5201  | 956.4935  |
| 14 | 88.0393  | 1454.6910 | 1437.6645 | 1436.6805      | 1482.6859 | 1465.6594 | 1464.6754      | 1410.7012 |           | D    | 800.4149  | 799.4196  |           | 860.4360  | 843.4094  |
| 15 | 102.0550 | 1583.7336 | 1566.7071 | 1565.7231      | 1611.7285 | 1594.7020 | 1593.7180      | 1525.7281 |           | E    | 671.3723  | 670.3770  |           | 745.4090  | 728.3825  |
| 16 | 86.0964  | 1696.8177 | 1679.7911 | 1678.8071      | 1724.8126 | 1707.7861 | 1706.8020      | 1668.7864 | 1682.8020 | I    | 558.2882  | 571.3086  | 585.3243  | 616.3665  | 599.3399  |
| 17 | 101.0709 | 1824.8763 | 1807.8497 | 1806.8657      | 1852.8712 | 1835.8446 | 1834.8606      | 1767.8548 |           | Q    | 430.2296  | 429.2344  |           | 503.2824  | 486.2558  |
| 18 | 102.0550 | 1953.9189 | 1936.8923 | 1935.9083      | 1981.9138 | 1964.8872 | 1963.9032      | 1895.9134 |           | E    | 301.1870  | 300.1918  |           | 375.2238  | 358.1973  |
| 19 | 72.0808  | 2052.9873 | 2035.9607 | 2034.9767      | 2080.9822 | 2063.9556 | 2062.9716      | 2038.9716 |           | V    | 202.1186  | 215.1390  |           | 246.1812  | 229.1547  |
| 20 | 101.1073 |           |           |                |           |           |                |           |           | K    | 74.0237   | 73.0284   |           | 147.1128  | 130.0863  |

| Seq | ya       | yb       | Seq | ya       | yb       | Seq  | ya       | yb       |
|-----|----------|----------|-----|----------|----------|------|----------|----------|
| NY  | 250.1186 | 278.1135 | NYA | 321.1557 | 349.1506 | NYAG | 378.1772 | 406.1721 |

|                        |          |          |                        |          |          |                         |          |          |
|------------------------|----------|----------|------------------------|----------|----------|-------------------------|----------|----------|
| <a href="#">NYAGV</a>  | 477.2456 | 505.2405 | <a href="#">NYAGVS</a> | 564.2776 | 592.2726 | <a href="#">NYAGVST</a> | 665.3253 | 693.3202 |
| <a href="#">YA</a>     | 207.1128 | 235.1077 | <a href="#">YAG</a>    | 264.1343 | 292.1292 | <a href="#">YAGV</a>    | 363.2027 | 391.1976 |
| <a href="#">YAGVS</a>  | 450.2347 | 478.2296 | <a href="#">YAGVST</a> | 551.2824 | 579.2773 | <a href="#">YAGVSTN</a> | 665.3253 | 693.3202 |
| <a href="#">AG</a>     | 101.0709 | 129.0659 | <a href="#">AGV</a>    | 200.1394 | 228.1343 | <a href="#">AGVS</a>    | 287.1714 | 315.1663 |
| <a href="#">AGVST</a>  | 388.2191 | 416.2140 | <a href="#">AGVSTN</a> | 502.2620 | 530.2569 | <a href="#">AGVSTNN</a> | 616.3049 | 644.2998 |
| <a href="#">GV</a>     | 129.1022 | 157.0972 | <a href="#">GVS</a>    | 216.1343 | 244.1292 | <a href="#">GVST</a>    | 317.1819 | 345.1769 |
| <a href="#">GVSTN</a>  | 431.2249 | 459.2198 | <a href="#">GVSTNN</a> | 545.2678 | 573.2627 | <a href="#">VS</a>      | 159.1128 | 187.1077 |
| <a href="#">VST</a>    | 260.1605 | 288.1554 | <a href="#">VSTN</a>   | 374.2034 | 402.1983 | <a href="#">VSTNN</a>   | 488.2463 | 516.2413 |
| <a href="#">VSTNNY</a> | 651.3097 | 679.3046 | <a href="#">ST</a>     | 161.0921 | 189.0870 | <a href="#">STN</a>     | 275.1350 | 303.1299 |
| <a href="#">STNN</a>   | 389.1779 | 417.1728 | <a href="#">STNNY</a>  | 552.2413 | 580.2362 | <a href="#">STNNYA</a>  | 623.2784 | 651.2733 |
| <a href="#">TN</a>     | 188.1030 | 216.0979 | <a href="#">TNN</a>    | 302.1459 | 330.1408 | <a href="#">TNNY</a>    | 465.2092 | 493.2041 |
| <a href="#">TNNYA</a>  | 536.2463 | 564.2413 | <a href="#">TNNYAL</a> | 649.3304 | 677.3253 | <a href="#">NN</a>      | 201.0982 | 229.0931 |
| <a href="#">NNY</a>    | 364.1615 | 392.1565 | <a href="#">NNYA</a>   | 435.1987 | 463.1936 | <a href="#">NNYAL</a>   | 548.2827 | 576.2776 |
| <a href="#">NNYALD</a> | 663.3097 | 691.3046 | <a href="#">NY</a>     | 250.1186 | 278.1135 | <a href="#">NYA</a>     | 321.1557 | 349.1506 |
| <a href="#">NYAL</a>   | 434.2398 | 462.2347 | <a href="#">NYALD</a>  | 549.2667 | 577.2617 | <a href="#">NYALDE</a>  | 678.3093 | 706.3042 |
| <a href="#">YA</a>     | 207.1128 | 235.1077 | <a href="#">YAL</a>    | 320.1969 | 348.1918 | <a href="#">YALD</a>    | 435.2238 | 463.2187 |
| <a href="#">YALDE</a>  | 564.2664 | 592.2613 | <a href="#">YALDEI</a> | 677.3505 | 705.3454 | <a href="#">AL</a>      | 157.1335 | 185.1285 |
| <a href="#">ALD</a>    | 272.1605 | 300.1554 | <a href="#">ALDE</a>   | 401.2031 | 429.1980 | <a href="#">ALDEI</a>   | 514.2871 | 542.2821 |
| <a href="#">ALDEIQ</a> | 642.3457 | 670.3406 | <a href="#">LD</a>     | 201.1234 | 229.1183 | <a href="#">LDE</a>     | 330.1660 | 358.1609 |
| <a href="#">LDEI</a>   | 443.2500 | 471.2449 | <a href="#">LDEIQ</a>  | 571.3086 | 599.3035 | <a href="#">DE</a>      | 217.0819 | 245.0768 |
| <a href="#">DEI</a>    | 330.1660 | 358.1609 | <a href="#">DEIQ</a>   | 458.2245 | 486.2195 | <a href="#">DEIQE</a>   | 587.2671 | 615.2620 |
| <a href="#">DEIQEV</a> | 686.3355 | 714.3305 | <a href="#">EI</a>     | 215.1390 | 243.1339 | <a href="#">EIQ</a>     | 343.1976 | 371.1925 |
| <a href="#">EIQE</a>   | 472.2402 | 500.2351 | <a href="#">EIQEV</a>  | 571.3086 | 599.3035 | <a href="#">IQ</a>      | 214.1550 | 242.1499 |
| <a href="#">IQE</a>    | 343.1976 | 371.1925 | <a href="#">IQEV</a>   | 442.2660 | 470.2609 | <a href="#">QE</a>      | 230.1135 | 258.1084 |
| <a href="#">QEV</a>    | 329.1819 | 357.1769 | <a href="#">EV</a>     | 201.1234 | 229.1183 |                         |          |          |

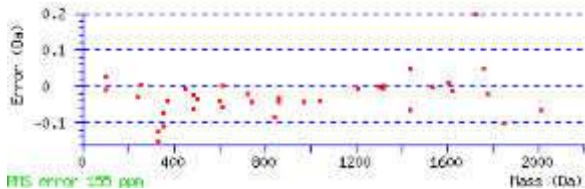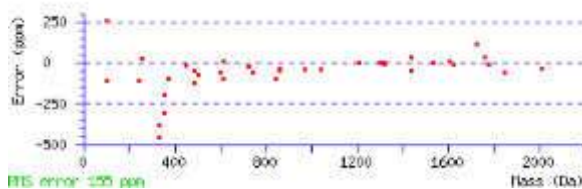

NCBI BLAST search of [VNYAGVSTNNYALDEIQEVK](#)  
 (Parameters: blastp, nr protein database, expect=20000, no filter, PAM30)  
 Other BLAST [web gateways](#)

All matches to this query

| Score | Mr(calcd) | Delta  | Sequence                               |
|-------|-----------|--------|----------------------------------------|
| 127.7 | 2226.0804 | 0.1550 | <a href="#">VNYAGVSTNNYALDEIQEVK</a>   |
| 8.8   | 2226.0990 | 0.1364 | <a href="#">OMDALGLPFSFSLSNKETS NK</a> |
| 8.2   | 2226.1492 | 0.0863 | <a href="#">ASVSGTLEQIIDKHGDIASASK</a> |
| 7.0   | 2226.1063 | 0.1291 | <a href="#">LGQCPSNVELHIDTSKSSVR</a>   |
| 4.5   | 2226.1141 | 0.1213 | <a href="#">GAHOODAAAPPLVLGOODSAR</a>  |
| 4.4   | 2226.0382 | 0.1972 | <a href="#">FFYETGIDESNANSPSEK R</a>   |
| 4.2   | 2226.1128 | 0.1226 | <a href="#">DSEKGSTSNLVIAS THIPEK</a>  |
| 4.1   | 2226.0725 | 0.1629 | <a href="#">EEEEELVEYILSTSRCLK</a>     |
| 4.0   | 2226.0625 | 0.1729 | <a href="#">VDSSSHSPHANSASLSSRVSSK</a> |
| 3.9   | 2226.0725 | 0.1629 | <a href="#">YEKILEMISDEDIQSELR</a>     |

Mascot: <http://www.matrixscience.com/>

**MATRIX SCIENCE Mascot Search Results**

**Peptide View Spot no 17**

MS/MS Fragmentation of **ESYWYNGTGSVVTVDDQDPNTRYPPVVVR**

Found in **gi34394725** in **NCBI**nr, putative Photosystem I reaction center subunit IV [Oryza sativa Japonica Group]

Match to Query 26: 3100.773724 from(3101.781000,1+) intensity(0.0000) index(10)  
 Title: Label: O9, Spot\_Id: 228984, Peak\_List\_Id: 257937, MSMS Job\_Run\_Id: 24944, Comment:  
 Data file ppw\_O9\_138985154400.txt

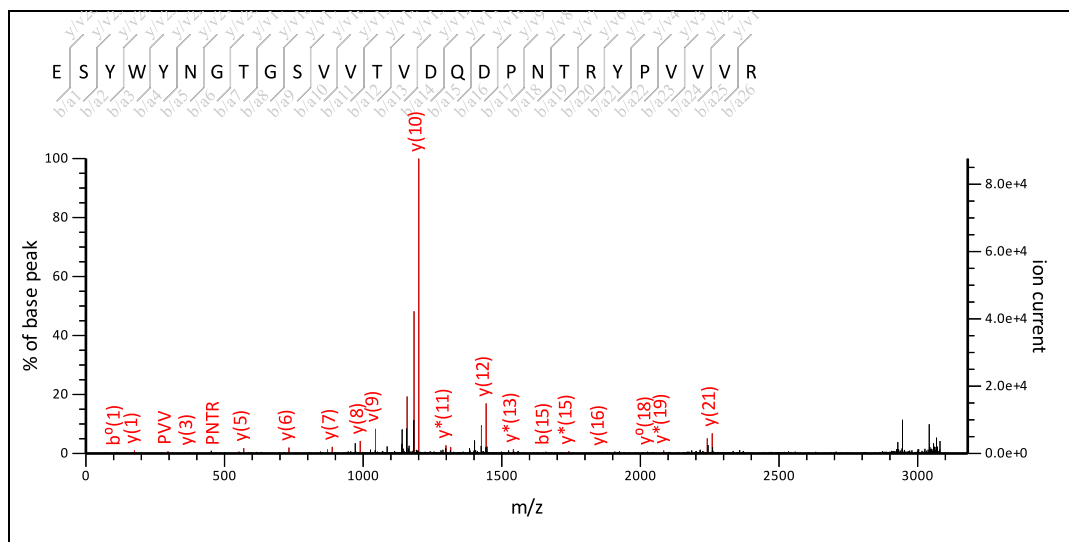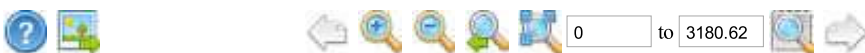

Label all possible matches  Label matches used for scoring

Monoisotopic mass of neutral peptide Mr(calc): 3100.4891  
 Fixed modifications: Carbamidomethyl (C) (apply to specified residues or termini only)  
 Ions Score: 54 Expect: 0.0033  
 Matches : 44/532 fragment ions using 62 most intense peaks ([help](#))

| #  | Immon.   | a         | a*        | a <sup>0</sup> | b         | b*        | b <sup>0</sup> | d         | d'        | Seq. | v         | w         | w'        | y         | y*        |
|----|----------|-----------|-----------|----------------|-----------|-----------|----------------|-----------|-----------|------|-----------|-----------|-----------|-----------|-----------|
| 1  | 102.0550 | 102.0550  |           | 84.0444        | 130.0499  |           | 112.0393       | 44.0495   |           | E    |           |           |           |           |           |
| 2  | 60.0444  | 189.0870  |           | 171.0764       | 217.0819  |           | 199.0713       | 173.0921  |           | S    | 2940.4275 | 2939.4323 |           | 2972.4537 | 2955.4272 |
| 3  | 136.0757 | 352.1503  |           | 334.1397       | 380.1452  |           | 362.1347       |           |           | Y    | 2777.3642 |           |           | 2885.4217 | 2868.3951 |
| 4  | 159.0917 | 538.2296  |           | 520.2191       | 566.2245  |           | 548.2140       |           |           | W    | 2591.2849 |           |           | 2722.3584 | 2705.3318 |
| 5  | 136.0757 | 701.2930  |           | 683.2824       | 729.2879  |           | 711.2773       |           |           | Y    | 2428.2215 |           |           | 2536.2790 | 2519.2525 |
| 6  | 87.0553  | 815.3359  | 798.3093  | 797.3253       | 843.3308  | 826.3042  | 825.3202       | 772.3301  |           | N    | 2314.1786 | 2313.1834 |           | 2373.2157 | 2356.1892 |
| 7  | 30.0338  | 872.3573  | 855.3308  | 854.3468       | 900.3523  | 883.3257  | 882.3417       |           |           | G    |           |           |           | 2259.1728 | 2242.1462 |
| 8  | 74.0600  | 973.4050  | 956.3785  | 955.3945       | 1001.3999 | 984.3734  | 983.3894       | 957.4101  | 959.3894  | T    | 2156.1095 | 2169.1299 | 2171.1091 | 2202.1513 | 2185.1248 |
| 9  | 30.0338  | 1030.4265 | 1013.3999 | 1012.4159      | 1058.4214 | 1041.3949 | 1040.4108      |           |           | G    |           |           |           | 2101.1036 | 2084.0771 |
| 10 | 60.0444  | 1117.4585 | 1100.4320 | 1099.4480      | 1145.4534 | 1128.4269 | 1127.4429      | 1101.4636 |           | S    | 2012.0560 | 2011.0607 |           | 2044.0822 | 2027.0556 |
| 11 | 72.0808  | 1216.5269 | 1199.5004 | 1198.5164      | 1244.5218 | 1227.4953 | 1226.5113      | 1202.5113 |           | V    | 1912.9876 | 1926.0080 |           | 1957.0502 | 1940.0236 |
| 12 | 72.0808  | 1315.5953 | 1298.5688 | 1297.5848      | 1343.5903 | 1326.5637 | 1325.5797      | 1301.5797 |           | V    | 1813.9191 | 1826.9395 |           | 1857.9817 | 1840.9552 |
| 13 | 74.0600  | 1416.6430 | 1399.6165 | 1398.6325      | 1444.6379 | 1427.6114 | 1426.6274      | 1400.6481 | 1402.6274 | T    | 1712.8715 | 1725.8919 | 1727.8711 | 1758.9133 | 1741.8868 |
| 14 | 72.0808  | 1515.7114 | 1498.6849 | 1497.7009      | 1543.7064 | 1526.6798 | 1525.6958      | 1501.6958 |           | V    | 1613.8030 | 1626.8234 |           | 1657.8656 | 1640.8391 |
| 15 | 88.0393  | 1630.7384 | 1613.7118 | 1612.7278      | 1658.7333 | 1641.7067 | 1640.7227      | 1586.7486 |           | D    | 1498.7761 | 1497.7809 |           | 1558.7972 | 1541.7707 |
| 16 | 101.0709 | 1758.7970 | 1741.7704 | 1740.7864      | 1786.7919 | 1769.7653 | 1768.7813      | 1701.7755 |           | Q    | 1370.7175 | 1369.7223 |           | 1443.7703 | 1426.7437 |
| 17 | 88.0393  | 1873.8239 | 1856.7974 | 1855.8133      | 1901.8188 | 1884.7923 | 1883.8083      | 1829.8341 |           | D    | 1255.6906 | 1254.6953 |           | 1315.7117 | 1298.6852 |
| 18 | 70.0651  | 1970.8767 | 1953.8501 | 1952.8661      | 1998.8716 | 1981.8450 | 1980.8610      | 1944.8610 |           | P    | 1158.6378 | 1157.6426 |           | 1200.6848 | 1183.6582 |
| 19 | 87.0553  | 2084.9196 | 2067.8930 | 2066.9090      | 2112.9145 | 2095.8880 | 2094.9039      | 2041.9138 |           | N    | 1044.5949 | 1043.5996 |           | 1103.6320 | 1086.6055 |
| 20 | 74.0600  | 2185.9673 | 2168.9407 | 2167.9567      | 2213.9622 | 2196.9356 | 2195.9516      | 2169.9724 | 2171.9516 | T    | 943.5472  | 956.5676  | 958.5469  | 989.5891  | 972.5625  |
| 21 | 129.1135 | 2342.0684 | 2325.0418 | 2324.0578      | 2370.0633 | 2353.0367 | 2352.0527      | 2257.0044 |           | R    | 787.4461  | 786.4509  |           | 888.5414  | 871.5148  |
| 22 | 136.0757 | 2505.1317 | 2488.1052 | 2487.1211      | 2533.1266 | 2516.1001 | 2515.1161      |           |           | Y    | 624.3828  |           |           | 732.4403  | 715.4137  |
| 23 | 70.0651  | 2602.1845 | 2585.1579 | 2584.1739      | 2630.1794 | 2613.1528 | 2612.1688      | 2576.1688 |           | P    | 527.3300  | 526.3348  |           | 569.3770  | 552.3504  |

|    |          |           |           |           |           |           |           |           |  |   |          |          |  |          |          |
|----|----------|-----------|-----------|-----------|-----------|-----------|-----------|-----------|--|---|----------|----------|--|----------|----------|
| 24 | 72.0808  | 2701.2529 | 2684.2263 | 2683.2423 | 2729.2478 | 2712.2213 | 2711.2372 | 2687.2372 |  | V | 428.2616 | 441.2820 |  | 472.3242 | 455.2976 |
| 25 | 72.0808  | 2800.3213 | 2783.2948 | 2782.3107 | 2828.3162 | 2811.2897 | 2810.3057 | 2786.3057 |  | V | 329.1932 | 342.2136 |  | 373.2558 | 356.2292 |
| 26 | 72.0808  | 2899.3897 | 2882.3632 | 2881.3792 | 2927.3846 | 2910.3581 | 2909.3741 | 2885.3741 |  | V | 230.1248 | 243.1452 |  | 274.1874 | 257.1608 |
| 27 | 129.1135 |           |           |           |           |           |           |           |  | R | 74.0237  | 73.0284  |  | 175.1190 | 158.0924 |

| Seq     | ya       | yb       | Seq      | ya       | yb       | Seq      | ya       | yb       |
|---------|----------|----------|----------|----------|----------|----------|----------|----------|
| SY      | 223.1077 | 251.1026 | SYW      | 409.1870 | 437.1819 | SYWY     | 572.2504 | 600.2453 |
| SYWYN   | 686.2933 | 714.2882 | YW       | 322.1550 | 350.1499 | YWY      | 485.2183 | 513.2132 |
| YWYN    | 599.2613 | 627.2562 | YWYNG    | 656.2827 | 684.2776 | WY       | 322.1550 | 350.1499 |
| WYN     | 436.1979 | 464.1928 | WYNG     | 493.2194 | 521.2143 | WYNGT    | 594.2671 | 622.2620 |
| WYNGTG  | 651.2885 | 679.2835 | YN       | 250.1186 | 278.1135 | YNG      | 307.1401 | 335.1350 |
| YNGT    | 408.1878 | 436.1827 | YNGTG    | 465.2092 | 493.2041 | YNGTGS   | 552.2413 | 580.2362 |
| YNGTGSV | 651.3097 | 679.3046 | NG       | 144.0768 | 172.0717 | NGT      | 245.1244 | 273.1193 |
| NGTG    | 302.1459 | 330.1408 | NGTGS    | 389.1779 | 417.1728 | NGTGSV   | 488.2463 | 516.2413 |
| NGTGSVV | 587.3148 | 615.3097 | NGTGSVVT | 688.3624 | 716.3573 | GT       | 131.0815 | 159.0764 |
| GTG     | 188.1030 | 216.0979 | GTGS     | 275.1350 | 303.1299 | GTGSV    | 374.2034 | 402.1983 |
| GTGSVV  | 473.2718 | 501.2667 | GTGSVVT  | 574.3195 | 602.3144 | GTGSVVTV | 673.3879 | 701.3828 |
| TG      | 131.0815 | 159.0764 | TGS      | 218.1135 | 246.1084 | TGSV     | 317.1819 | 345.1769 |
| TGSVV   | 416.2504 | 444.2453 | TGSVVT   | 517.2980 | 545.2930 | TGSVVTV  | 616.3665 | 644.3614 |
| GS      | 117.0659 | 145.0608 | GSV      | 216.1343 | 244.1292 | GSVV     | 315.2027 | 343.1976 |
| GSVVT   | 416.2504 | 444.2453 | GSVVTV   | 515.3188 | 543.3137 | GSVVTVD  | 630.3457 | 658.3406 |
| SV      | 159.1128 | 187.1077 | SVV      | 258.1812 | 286.1761 | SVVT     | 359.2289 | 387.2238 |
| SVVTV   | 458.2973 | 486.2922 | SVVTVD   | 573.3243 | 601.3192 | VV       | 171.1492 | 199.1441 |
| VVT     | 272.1969 | 300.1918 | VVTV     | 371.2653 | 399.2602 | VVTVD    | 486.2922 | 514.2871 |
| VVTVDQ  | 614.3508 | 642.3457 | VT       | 173.1285 | 201.1234 | VTV      | 272.1969 | 300.1918 |
| VTVD    | 387.2238 | 415.2187 | VTVDQ    | 515.2824 | 543.2773 | VTVDQD   | 630.3093 | 658.3042 |
| TV      | 173.1285 | 201.1234 | TVD      | 288.1554 | 316.1503 | TVDQ     | 416.2140 | 444.2089 |
| TVDQD   | 531.2409 | 559.2358 | TVDQDP   | 628.2937 | 656.2886 | VD       | 187.1077 | 215.1026 |
| VDQ     | 315.1663 | 343.1612 | VDQD     | 430.1932 | 458.1882 | VDQDP    | 527.2460 | 555.2409 |
| VDQDPN  | 641.2889 | 669.2838 | DQ       | 216.0979 | 244.0928 | DQD      | 331.1248 | 359.1197 |
| DQDP    | 428.1776 | 456.1725 | DQDPN    | 542.2205 | 570.2154 | DQDPNT   | 643.2682 | 671.2631 |
| QD      | 216.0979 | 244.0928 | QDP      | 313.1506 | 341.1456 | QDPN     | 427.1936 | 455.1885 |
| QDPNT   | 528.2413 | 556.2362 | QDPNTR   | 684.3424 | 712.3373 | DP       | 185.0921 | 213.0870 |
| DPN     | 299.1350 | 327.1299 | DPNT     | 400.1827 | 428.1776 | DPNTR    | 556.2838 | 584.2787 |
| PN      | 184.1081 | 212.1030 | PNT      | 285.1557 | 313.1506 | PNTR     | 441.2568 | 469.2518 |
| PNTRY   | 604.3202 | 632.3151 | NT       | 188.1030 | 216.0979 | NTR      | 344.2041 | 372.1990 |
| NTRY    | 507.2674 | 535.2623 | NTRYP    | 604.3202 | 632.3151 | TR       | 230.1612 | 258.1561 |
| TRY     | 393.2245 | 421.2194 | TRYP     | 490.2772 | 518.2722 | TRYPV    | 589.3457 | 617.3406 |
| TRYPVV  | 688.4141 | 716.4090 | RY       | 292.1768 | 320.1717 | RYP      | 389.2296 | 417.2245 |
| RYPV    | 488.2980 | 516.2929 | RYPVV    | 587.3664 | 615.3613 | RYPVVV   | 686.4348 | 714.4297 |
| YP      | 233.1285 | 261.1234 | YPV      | 332.1969 | 360.1918 | YPVV     | 431.2653 | 459.2602 |
| YPVVV   | 530.3337 | 558.3286 | PV       | 169.1335 | 197.1285 | PVV      | 268.2020 | 296.1969 |
| PVVV    | 367.2704 | 395.2653 | VV       | 171.1492 | 199.1441 | VVV      | 270.2176 | 298.2125 |
| VV      | 171.1492 | 199.1441 |          |          |          |          |          |          |

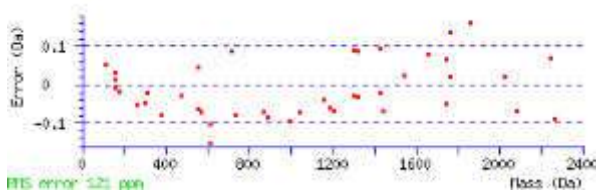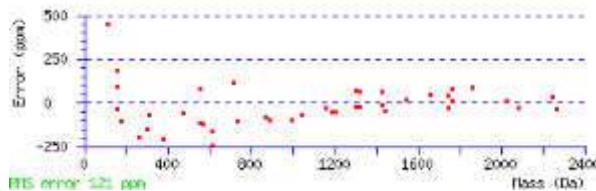

NCBI BLAST search of [ESYWYNGTGSVVTVDQDPNTRYPPVVVR](#)  
 (Parameters: blastp, nr protein database, expect=20000, no filter, PAM30)  
 Other BLAST [web gateways](#)

All matches to this query

|  |  |  |  |
|--|--|--|--|
|  |  |  |  |
|--|--|--|--|

| Score | Mr(calc)  | Delta  | Sequence                                          |
|-------|-----------|--------|---------------------------------------------------|
| 53.8  | 3100.4891 | 0.2847 | <a href="#">ESYWYNGTGSVVTVDQDPNTRYPVVVR</a>       |
| 2.4   | 3100.4648 | 0.3089 | <a href="#">GNPGFGVSEMSGGVGFGWMGRTLVAASAWR</a>    |
| 0.9   | 3100.4949 | 0.2788 | <a href="#">NTSSTSSEFLYLGATIVNSRGGVDELS DPR</a>   |
| 0.8   | 3100.5646 | 0.2091 | <a href="#">VGGTVVMAMNGTVDGGSVVG PVTVNQNVTAVR</a> |
| 0.5   | 3100.5011 | 0.2726 | <a href="#">FANWRDSLGC SMAPNPPK PENLPTVER</a>     |

Mascot: <http://www.matrixscience.com/>

# MATRIX SCIENCE Mascot Search Results

## Peptide View **Spot no 18**

MS/MS Fragmentation of **HHHHLFHHK**

Found in **gi|15667623** in **NCBI**nr, drought inducible 22 kD protein [Saccharum officinarum]

Match to Query 7: 1228.673524 from(1229.680800,1+) intensity(0.0000) index(2)

Title: Label: K8, Spot\_Id: 219796, Peak\_List\_Id: 226437, MSMS Job\_Run\_Id: 21844, Comment:

Data file C:\Documents and Settings\Administrator\Desktop\Farah-Garima 11May 2013\ppw\_K8\_136859930300.txt

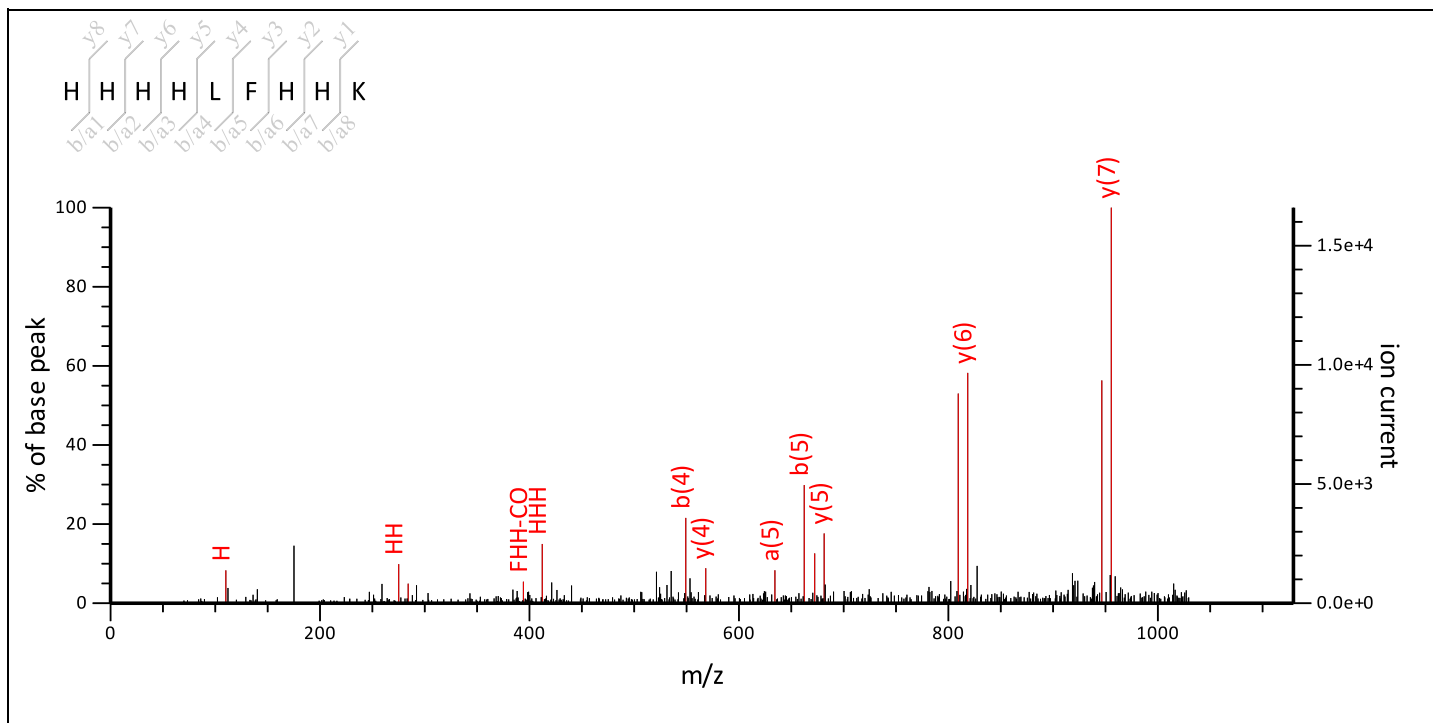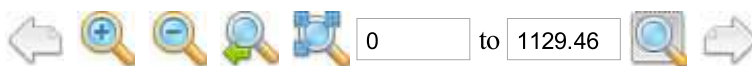

Label all possible matches  Label matches used for scoring

**Monoisotopic mass of neutral peptide Mr(calc):** 1228.6115

**Fixed modifications:** Carbamidomethyl (C) (apply to specified residues or termini only)

**Ions Score:** 45 **Expect:** 1.1

**Matches :** 27/89 fragment ions using 20 most intense peaks ([help](#))

| # | Immon.   | a               | b               | d        | Seq. | v         | w        | y               | y*        | # |
|---|----------|-----------------|-----------------|----------|------|-----------|----------|-----------------|-----------|---|
| 1 | 110.0713 | <b>110.0713</b> | 138.0662        | 44.0495  | H    |           |          |                 |           | 9 |
| 2 | 110.0713 | 247.1302        | <b>275.1251</b> |          | H    | 1010.5067 |          | 1092.5598       | 1075.5333 | 8 |
| 3 | 110.0713 | 384.1891        | <b>412.1840</b> |          | H    | 873.4478  |          | <b>955.5009</b> | 938.4744  | 7 |
| 4 | 110.0713 | 521.2480        | <b>549.2429</b> |          | H    | 736.3889  |          | <b>818.4420</b> | 801.4155  | 6 |
| 5 | 86.0964  | <b>634.3321</b> | <b>662.3270</b> | 592.2851 | L    | 623.3049  | 622.3096 | <b>681.3831</b> | 664.3566  | 5 |
| 6 | 120.0808 | 781.4005        | <b>809.3954</b> |          | F    | 476.2364  |          | <b>568.2990</b> | 551.2725  | 4 |
| 7 | 110.0713 | 918.4594        | <b>946.4543</b> |          | H    | 339.1775  |          | 421.2306        | 404.2041  | 3 |
| 8 | 110.0713 | 1055.5183       | 1083.5132       |          | H    | 202.1186  |          | <b>284.1717</b> | 267.1452  | 2 |



|   |          |  |  |  |   |         |         |          |          |   |
|---|----------|--|--|--|---|---------|---------|----------|----------|---|
| 9 | 101.1073 |  |  |  | K | 74.0237 | 73.0284 | 147.1128 | 130.0863 | 1 |
|---|----------|--|--|--|---|---------|---------|----------|----------|---|

| Seq   | ya       | yb       | Seq   | ya       | yb       | Seq   | ya       | yb       |
|-------|----------|----------|-------|----------|----------|-------|----------|----------|
| HH    | 247.1302 | 275.1251 | HHH   | 384.1891 | 412.1840 | HHHL  | 497.2732 | 525.2681 |
| HHHLF | 644.3416 | 672.3365 | HH    | 247.1302 | 275.1251 | HHL   | 360.2142 | 388.2092 |
| HHLF  | 507.2827 | 535.2776 | HHLFH | 644.3416 | 672.3365 | HL    | 223.1553 | 251.1503 |
| HLF   | 370.2238 | 398.2187 | HLFH  | 507.2827 | 535.2776 | HLFHH | 644.3416 | 672.3365 |
| LF    | 233.1648 | 261.1598 | LFH   | 370.2238 | 398.2187 | LFHH  | 507.2827 | 535.2776 |
| FH    | 257.1397 | 285.1346 | FHH   | 394.1986 | 422.1935 | HH    | 247.1302 | 275.1251 |

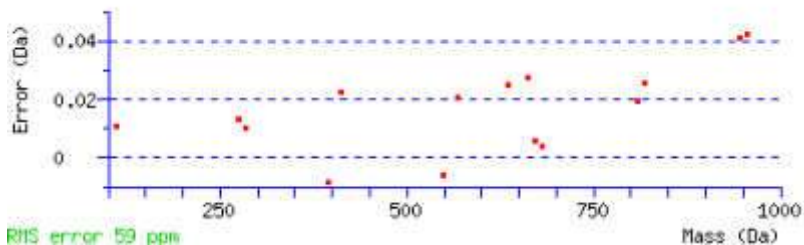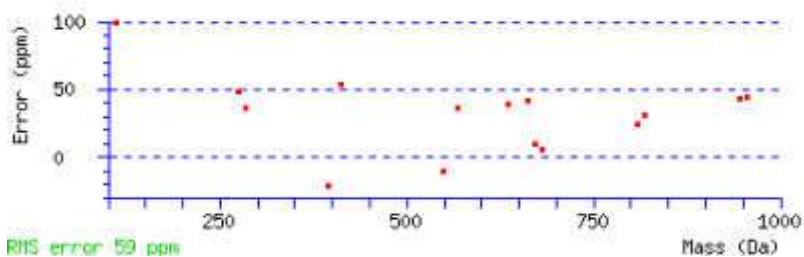

NCBI BLAST search of [HHHHLFHHK](#)

(Parameters: blastp, nr protein database, expect=20000, no filter, PAM30)

Other BLAST [web gateways](#)

#### All matches to this query

| Score | Mr(calc)  | Delta   | Sequence                     |
|-------|-----------|---------|------------------------------|
| 45.2  | 1228.6115 | 0.0620  | <a href="#">HHHHLFHHK</a>    |
| 30.6  | 1228.7153 | -0.0417 | <a href="#">RAALVAVHHQK</a>  |
| 28.6  | 1228.7292 | -0.0557 | <a href="#">GLIAGVGLQVFR</a> |
| 27.7  | 1228.6313 | 0.0423  | <a href="#">GSQEFIRHGAK</a>  |
| 27.7  | 1228.6941 | -0.0206 | <a href="#">RPWQLHHKK</a>    |
| 27.7  | 1228.6651 | 0.0084  | <a href="#">WMHLLHHKK</a>    |
| 27.5  | 1228.5533 | 0.1202  | <a href="#">HHHHHHMTR</a>    |
| 27.5  | 1228.6075 | 0.0661  | <a href="#">HHHHHQLQR</a>    |
| 27.5  | 1228.6075 | 0.0661  | <a href="#">HHHHQOHLR</a>    |
| 24.9  | 1228.5983 | 0.0753  | <a href="#">ADAGPRLVDCR</a>  |

Mascot: <http://www.matrixscience.com/>

# MATRIX SCIENCE Mascot Search Results

## Peptide View Spot no 18

MS/MS Fragmentation of **HHHHLFHHKK**

Found in **gi|15667623** in **NCBI**nr, drought inducible 22 kD protein [Saccharum officinarum]

Match to Query 10: 1356.769724 from(1357.777000,1+) intensity(0.0000) index(4)

Title: Label: K8, Spot\_Id: 219796, Peak\_List\_Id: 226451, MSMS Job\_Run\_Id: 21844, Comment:

Data file C:\Documents and Settings\Administrator\Desktop\Farah-Garima 11May 2013\ppw\_K8\_136859930300.txt

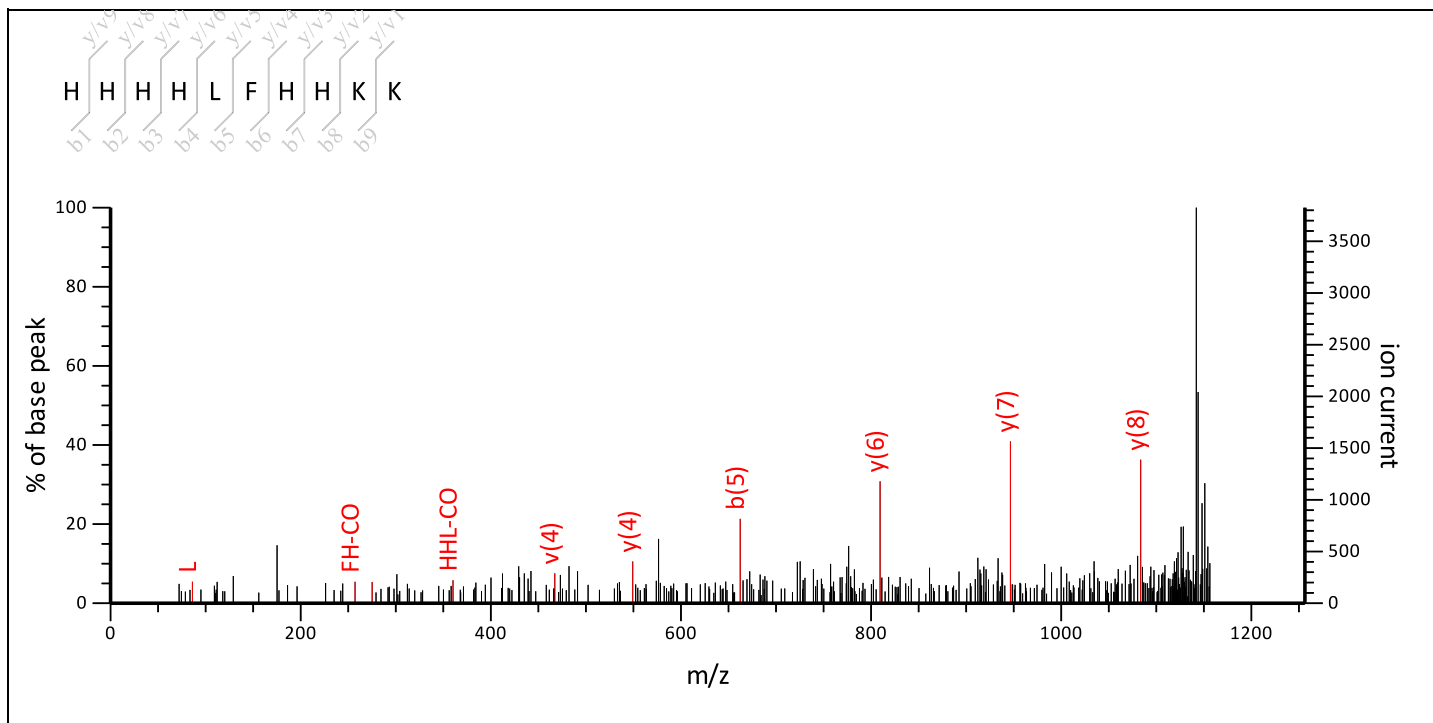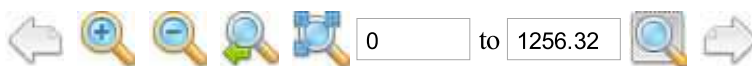

Label all possible matches  Label matches used for scoring

**Monoisotopic mass of neutral peptide Mr(calc):** 1356.7064

**Fixed modifications:** Carbamidomethyl (C) (apply to specified residues or termini only)

**Ions Score:** 17 **Expect:** 6.7e+02

**Matches :** 18/107 fragment ions using 33 most intense peaks ([help](#))

| # | Immon.         | a         | a* | b                | b* | d        | Seq. | v               | w        | y                | y*        | #  |
|---|----------------|-----------|----|------------------|----|----------|------|-----------------|----------|------------------|-----------|----|
| 1 | 110.0713       | 110.0713  |    | 138.0662         |    | 44.0495  | H    |                 |          |                  |           | 10 |
| 2 | 110.0713       | 247.1302  |    | <b>275.1251</b>  |    |          | H    | 1138.6017       |          | 1220.6548        | 1203.6283 | 9  |
| 3 | 110.0713       | 384.1891  |    | 412.1840         |    |          | H    | 1001.5428       |          | <b>1083.5959</b> | 1066.5693 | 8  |
| 4 | 110.0713       | 521.2480  |    | <b>549.2429</b>  |    |          | H    | 864.4839        |          | <b>946.5370</b>  | 929.5104  | 7  |
| 5 | <b>86.0964</b> | 634.3321  |    | <b>662.3270</b>  |    | 592.2851 | L    | 751.3998        | 750.4046 | <b>809.4781</b>  | 792.4515  | 6  |
| 6 | 120.0808       | 781.4005  |    | <b>809.3954</b>  |    |          | F    | 604.3314        |          | 696.3940         | 679.3675  | 5  |
| 7 | 110.0713       | 918.4594  |    | <b>946.4543</b>  |    |          | H    | <b>467.2725</b> |          | <b>549.3256</b>  | 532.2990  | 4  |
| 8 | 110.0713       | 1055.5183 |    | <b>1083.5132</b> |    |          | H    | 330.2136        |          | 412.2667         | 395.2401  | 3  |

|    |          |           |           |           |           |           |   |          |          |          |          |   |
|----|----------|-----------|-----------|-----------|-----------|-----------|---|----------|----------|----------|----------|---|
| 9  | 101.1073 | 1183.6133 | 1166.5867 | 1211.6082 | 1194.5816 | 1126.5554 | K | 202.1186 | 201.1234 | 275.2078 | 258.1812 | 2 |
| 10 | 101.1073 |           |           |           |           |           | K | 74.0237  | 73.0284  | 147.1128 | 130.0863 | 1 |

| Seq   | ya       | yb       | Seq   | ya       | yb       | Seq   | ya       | yb       |
|-------|----------|----------|-------|----------|----------|-------|----------|----------|
| HH    | 247.1302 | 275.1251 | HHH   | 384.1891 | 412.1840 | HHHL  | 497.2732 | 525.2681 |
| HHHLF | 644.3416 | 672.3365 | HH    | 247.1302 | 275.1251 | HHL   | 360.2142 | 388.2092 |
| HHLF  | 507.2827 | 535.2776 | HHLFH | 644.3416 | 672.3365 | HL    | 223.1553 | 251.1503 |
| HLF   | 370.2238 | 398.2187 | HLFH  | 507.2827 | 535.2776 | HLFHH | 644.3416 | 672.3365 |
| LF    | 233.1648 | 261.1598 | LFH   | 370.2238 | 398.2187 | LFHH  | 507.2827 | 535.2776 |
| LFHHK | 635.3776 | 663.3725 | FH    | 257.1397 | 285.1346 | FHH   | 394.1986 | 422.1935 |
| FHHK  | 522.2936 | 550.2885 | HH    | 247.1302 | 275.1251 | HHK   | 375.2251 | 403.2201 |
| HK    | 238.1662 | 266.1612 |       |          |          |       |          |          |

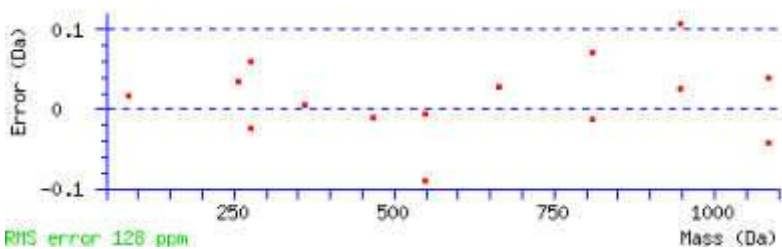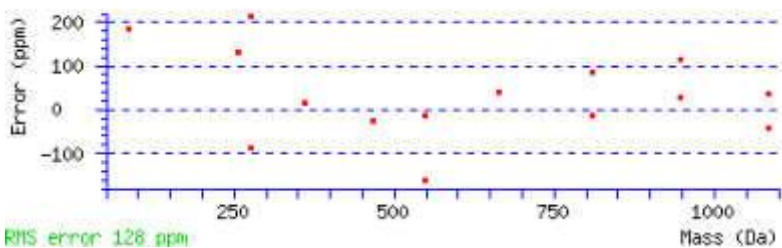

NCBI **BLAST** search of [HHHHLFHHKK](#)

(Parameters: blastp, nr protein database, expect=20000, no filter, PAM30)

Other BLAST [web gateways](#)

#### All matches to this query

| Score | Mr(calc)  | Delta   | Sequence                       |
|-------|-----------|---------|--------------------------------|
| 23.8  | 1356.8030 | -0.0333 | <a href="#">ILKGHFLQVER</a>    |
| 20.2  | 1356.6422 | 0.1275  | <a href="#">AGDAPHFSLEAR</a>   |
| 17.7  | 1356.6568 | 0.1129  | <a href="#">DPGAAGRALENMR</a>  |
| 17.7  | 1356.8493 | -0.0796 | <a href="#">IPLATSLKVER</a>    |
| 17.6  | 1356.7361 | 0.0336  | <a href="#">IGLQIGNLSGETR</a>  |
| 17.0  | 1356.7302 | 0.0395  | <a href="#">ADPKHLFNFLR</a>    |
| 16.7  | 1356.7064 | 0.0633  | <a href="#">HHHHLFHHKK</a>     |
| 16.5  | 1356.6820 | 0.0878  | <a href="#">SSMRSLFSSSLR</a>   |
| 15.6  | 1356.7184 | 0.0514  | <a href="#">KGAPLPASSGGLMR</a> |
| 15.3  | 1356.7262 | 0.0435  | <a href="#">AGTOHGLIPAHAGK</a> |

Mascot: <http://www.matrixscience.com/>



**MATRIX SCIENCE Mascot Search Results**

**Peptide View Spot no 18**

MS/MS Fragmentation of **QHLGEAGAIAAGAFALYEK**

Found in **gi|15667623** in **NCBI**nr, drought inducible 22 kD protein [Saccharum officinarum]

Match to Query 24: 1916.054524 from(1917.061800,1+) intensity(0.0000) index(10)

Title: Label: K8, Spot\_Id: 219796, Peak\_List\_Id: 226444, MSMS Job\_Run\_Id: 21844, Comment:

Data file C:\Documents and Settings\Administrator\Desktop\Farah-Garima 11May 2013\ppw\_K8\_136859930300.txt

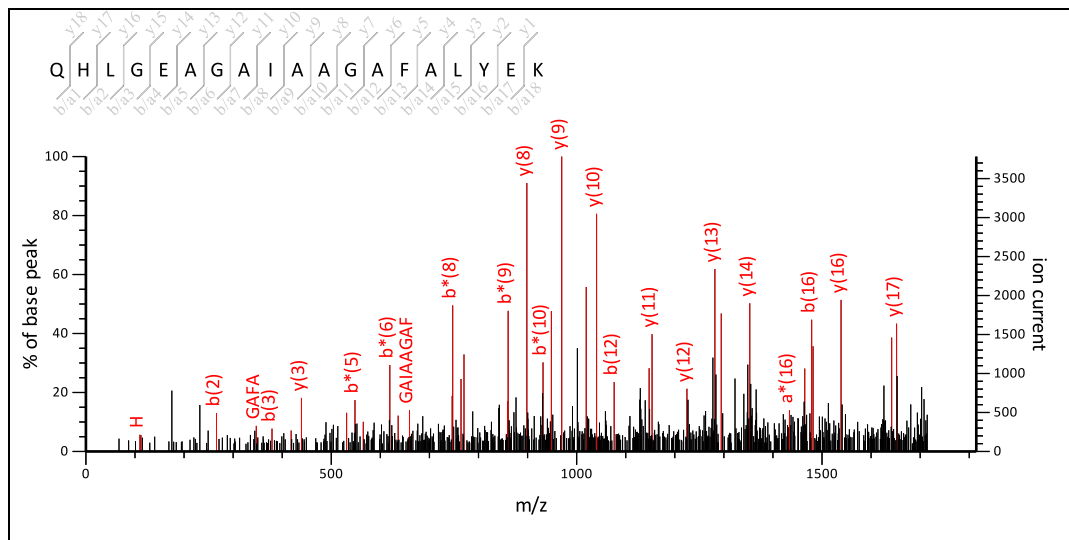

Navigation icons: Home, Back, Forward, Search, and a search range input from 0 to 1814.36.

Label all possible matches  Label matches used for scoring

Monoisotopic mass of neutral peptide Mr(calc): 1915.9792

Fixed modifications: Carbamidomethyl (C) (apply to specified residues or termini only)

Ions Score: 105 Expect: 8.1e-07

Matches : 44/377 fragment ions using 51 most intense peaks [\(help\)](#)

| #  | Immon.   | a         | a*        | a <sup>0</sup> | b         | b*        | b <sup>0</sup> | d         | d'       | Seq. | v         | w         | w'        | y         | y*        |
|----|----------|-----------|-----------|----------------|-----------|-----------|----------------|-----------|----------|------|-----------|-----------|-----------|-----------|-----------|
| 1  | 101.0709 | 101.0709  | 84.0444   |                | 129.0659  | 112.0393  |                | 44.0495   |          | Q    |           |           |           |           |           |
| 2  | 110.0713 | 238.1299  | 221.1033  |                | 266.1248  | 249.0982  |                |           |          | H    | 1706.8748 |           |           | 1788.9279 | 1771.9014 |
| 3  | 86.0964  | 351.2139  | 334.1874  |                | 379.2088  | 362.1823  |                | 309.1670  |          | L    | 1593.7908 | 1592.7955 |           | 1651.8690 | 1634.8425 |
| 4  | 30.0338  | 408.2354  | 391.2088  |                | 436.2303  | 419.2037  |                |           |          | G    |           |           |           | 1538.7849 | 1521.7584 |
| 5  | 102.0550 | 537.2780  | 520.2514  | 519.2674       | 565.2729  | 548.2463  | 547.2623       | 479.2725  |          | E    | 1407.7267 | 1406.7314 |           | 1481.7635 | 1464.7369 |
| 6  | 44.0495  | 608.3151  | 591.2885  | 590.3045       | 636.3100  | 619.2835  | 618.2994       |           |          | A    | 1336.6896 |           |           | 1352.7209 | 1335.6943 |
| 7  | 30.0338  | 665.3366  | 648.3100  | 647.3260       | 693.3315  | 676.3049  | 675.3209       |           |          | G    |           |           |           | 1281.6838 | 1264.6572 |
| 8  | 44.0495  | 736.3737  | 719.3471  | 718.3631       | 764.3686  | 747.3420  | 746.3580       |           |          | A    | 1208.6310 |           |           | 1224.6623 | 1207.6358 |
| 9  | 86.0964  | 849.4577  | 832.4312  | 831.4472       | 877.4526  | 860.4261  | 859.4421       | 821.4264  | 835.4421 | I    | 1095.5469 | 1108.5673 | 1122.5830 | 1153.6252 | 1136.5986 |
| 10 | 44.0495  | 920.4948  | 903.4683  | 902.4843       | 948.4898  | 931.4632  | 930.4792       |           |          | A    | 1024.5098 |           |           | 1040.5411 | 1023.5146 |
| 11 | 44.0495  | 991.5320  | 974.5054  | 973.5214       | 1019.5269 | 1002.5003 | 1001.5163      |           |          | A    | 953.4727  |           |           | 969.5040  | 952.4775  |
| 12 | 30.0338  | 1048.5534 | 1031.5269 | 1030.5429      | 1076.5483 | 1059.5218 | 1058.5378      |           |          | G    |           |           |           | 898.4669  | 881.4403  |
| 13 | 44.0495  | 1119.5905 | 1102.5640 | 1101.5800      | 1147.5854 | 1130.5589 | 1129.5749      |           |          | A    | 825.4141  |           |           | 841.4454  | 824.4189  |
| 14 | 120.0808 | 1266.6589 | 1249.6324 | 1248.6484      | 1294.6539 | 1277.6273 | 1276.6433      |           |          | F    | 678.3457  |           |           | 770.4083  | 753.3818  |
| 15 | 44.0495  | 1337.6961 | 1320.6695 | 1319.6855      | 1365.6910 | 1348.6644 | 1347.6804      |           |          | A    | 607.3086  |           |           | 623.3399  | 606.3134  |
| 16 | 86.0964  | 1450.7801 | 1433.7536 | 1432.7696      | 1478.7750 | 1461.7485 | 1460.7645      | 1408.7332 |          | L    | 494.2245  | 493.2293  |           | 552.3028  | 535.2762  |
| 17 | 136.0757 | 1613.8435 | 1596.8169 | 1595.8329      | 1641.8384 | 1624.8118 | 1623.8278      |           |          | Y    | 331.1612  |           |           | 439.2187  | 422.1922  |
| 18 | 102.0550 | 1742.8860 | 1725.8595 | 1724.8755      | 1770.8810 | 1753.8544 | 1752.8704      | 1684.8806 |          | E    | 202.1186  | 201.1234  |           | 276.1554  | 259.1288  |
| 19 | 101.1073 |           |           |                |           |           |                |           |          | K    | 74.0237   | 73.0284   |           | 147.1128  | 130.0863  |

| Seq   | ya       | yb       | Seq    | ya       | yb       | Seq     | ya       | yb       |
|-------|----------|----------|--------|----------|----------|---------|----------|----------|
| HL    | 223.1553 | 251.1503 | HLG    | 280.1768 | 308.1717 | HLGE    | 409.2194 | 437.2143 |
| HLGEA | 480.2565 | 508.2514 | HLGEAG | 537.2780 | 565.2729 | HLGEAGA | 608.3151 | 636.3100 |

|          |          |          |           |          |          |           |          |          |
|----------|----------|----------|-----------|----------|----------|-----------|----------|----------|
| LG       | 143.1179 | 171.1128 | LGE       | 272.1605 | 300.1554 | LGEA      | 343.1976 | 371.1925 |
| LGEAG    | 400.2191 | 428.2140 | LGEAGA    | 471.2562 | 499.2511 | LGEAGAI   | 584.3402 | 612.3352 |
| LGEAGAI  | 655.3774 | 683.3723 | GE        | 159.0764 | 187.0713 | GEA       | 230.1135 | 258.1084 |
| GEAG     | 287.1350 | 315.1299 | GEAGA     | 358.1721 | 386.1670 | GEAGAI    | 471.2562 | 499.2511 |
| GEAGAIA  | 542.2933 | 570.2882 | GEAGAIAA  | 613.3304 | 641.3253 | GEAGAIAAG | 670.3519 | 698.3468 |
| EA       | 173.0921 | 201.0870 | EAG       | 230.1135 | 258.1084 | EAGA      | 301.1506 | 329.1456 |
| EAGAI    | 414.2347 | 442.2296 | EAGAIA    | 485.2718 | 513.2667 | EAGAIAA   | 556.3089 | 584.3039 |
| EAGAIAAG | 613.3304 | 641.3253 | EAGAIAAGA | 684.3675 | 712.3624 | AG        | 101.0709 | 129.0659 |
| AGA      | 172.1081 | 200.1030 | AGAI      | 285.1921 | 313.1870 | AGAIA     | 356.2292 | 384.2241 |
| AGAIAA   | 427.2663 | 455.2613 | AGAIAAG   | 484.2878 | 512.2827 | AGAIAAGA  | 555.3249 | 583.3198 |
| GA       | 101.0709 | 129.0659 | GAI       | 214.1550 | 242.1499 | GAIA      | 285.1921 | 313.1870 |
| GAIAA    | 356.2292 | 384.2241 | GAIAAG    | 413.2507 | 441.2456 | GAIAAGA   | 484.2878 | 512.2827 |
| GAIAAGAF | 631.3562 | 659.3511 | AI        | 157.1335 | 185.1285 | AIA       | 228.1707 | 256.1656 |
| AIAA     | 299.2078 | 327.2027 | AIAAG     | 356.2292 | 384.2241 | AIAAGA    | 427.2663 | 455.2613 |
| AIAAGAF  | 574.3348 | 602.3297 | AIAAGAF   | 645.3719 | 673.3668 | IA        | 157.1335 | 185.1285 |
| IAA      | 228.1707 | 256.1656 | IAAG      | 285.1921 | 313.1870 | IAAGA     | 356.2292 | 384.2241 |
| IAAGAF   | 503.2976 | 531.2926 | IAAGAF    | 574.3348 | 602.3297 | IAAGAFAL  | 687.4188 | 715.4137 |
| AA       | 115.0866 | 143.0815 | AAG       | 172.1081 | 200.1030 | AAGA      | 243.1452 | 271.1401 |
| AAGAF    | 390.2136 | 418.2085 | AAGAF     | 461.2507 | 489.2456 | AAGAFAL   | 574.3348 | 602.3297 |
| AG       | 101.0709 | 129.0659 | AGA       | 172.1081 | 200.1030 | AGAF      | 319.1765 | 347.1714 |
| AGAF     | 390.2136 | 418.2085 | AGAFAL    | 503.2976 | 531.2926 | AGAFALY   | 666.3610 | 694.3559 |
| GA       | 101.0709 | 129.0659 | GAF       | 248.1394 | 276.1343 | GAF       | 319.1765 | 347.1714 |
| GAFAL    | 432.2605 | 460.2554 | GAFALY    | 595.3239 | 623.3188 | AF        | 191.1179 | 219.1128 |
| AFA      | 262.1550 | 290.1499 | AFAL      | 375.2391 | 403.2340 | AFALY     | 538.3024 | 566.2973 |
| AFALY    | 667.3450 | 695.3399 | FA        | 191.1179 | 219.1128 | FAL       | 304.2020 | 332.1969 |
| FALY     | 467.2653 | 495.2602 | FALY      | 596.3079 | 624.3028 | AL        | 157.1335 | 185.1285 |
| ALY      | 320.1969 | 348.1918 | ALY       | 449.2395 | 477.2344 | LY        | 249.1598 | 277.1547 |
| LYE      | 378.2023 | 406.1973 | YE        | 265.1183 | 293.1132 |           |          |          |

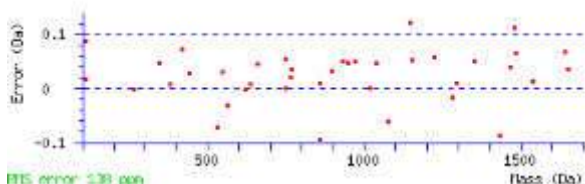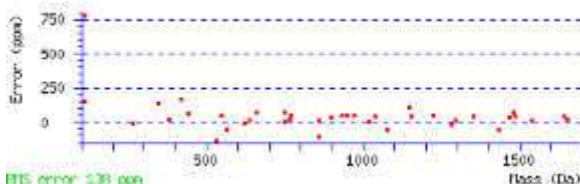

NCBI BLAST search of [OHLGEAGAIAGAFALYEK](#)  
 (Parameters: blastp, nr protein database, expect=20000, no filter, PAM30)  
 Other BLAST [web gateways](#)

All matches to this query

| Score | Mr(calcd) | Delta   | Sequence                               |
|-------|-----------|---------|----------------------------------------|
| 104.9 | 1915.9792 | 0.0754  | <a href="#">OHLGEAGAIAGAFALYEK</a>     |
| 104.9 | 1915.9792 | 0.0754  | <a href="#">OHLGEAGALAAGAFALYEK</a>    |
| 21.1  | 1916.0592 | -0.0047 | <a href="#">LLLTHDAHRITVTVGDR</a>      |
| 20.6  | 1915.8768 | 0.1778  | <a href="#">MDSASMTAAAKALADAGFR</a>    |
| 16.1  | 1916.0150 | 0.0396  | <a href="#">IGDVVTKGOAIALMGNTGR</a>    |
| 15.4  | 1916.0731 | -0.0186 | <a href="#">TVAVIGGGVSGLAATAKAFAEK</a> |
| 14.7  | 1915.9534 | 0.1011  | <a href="#">GSGKGGQLQAAMAQIAEAGR</a>   |
| 14.6  | 1915.9561 | 0.0984  | <a href="#">DVMGTDDPLILSLISGDR</a>     |
| 14.4  | 1915.9866 | 0.0679  | <a href="#">DELLMKPSAYFINVSR</a>       |
| 14.2  | 1915.9064 | 0.1481  | <a href="#">AGDYFSEAGATPATKAFGR</a>    |

Mascot: <http://www.matrixscience.com/>

**MATRIX SCIENCE Mascot Search Results**

**Peptide View Spot no 18**

MS/MS Fragmentation of **HKQHLGEAGAIAAGAFALYEK**

Found in **gi|15667623** in **NCBIInr**, drought inducible 22 kD protein [Saccharum officinarum]

Match to Query 26: 2181.221024 from(2182.228300,1+) intensity(0.0000) index(11)

Title: Label: K8, Spot\_Id: 219796, Peak\_List\_Id: 226439, MSMS Job\_Run\_Id: 21844, Comment:

Data file C:\Documents and Settings\Administrator\Desktop\Farah-Garima 11May 2013\ppw\_K8\_136859930300.txt

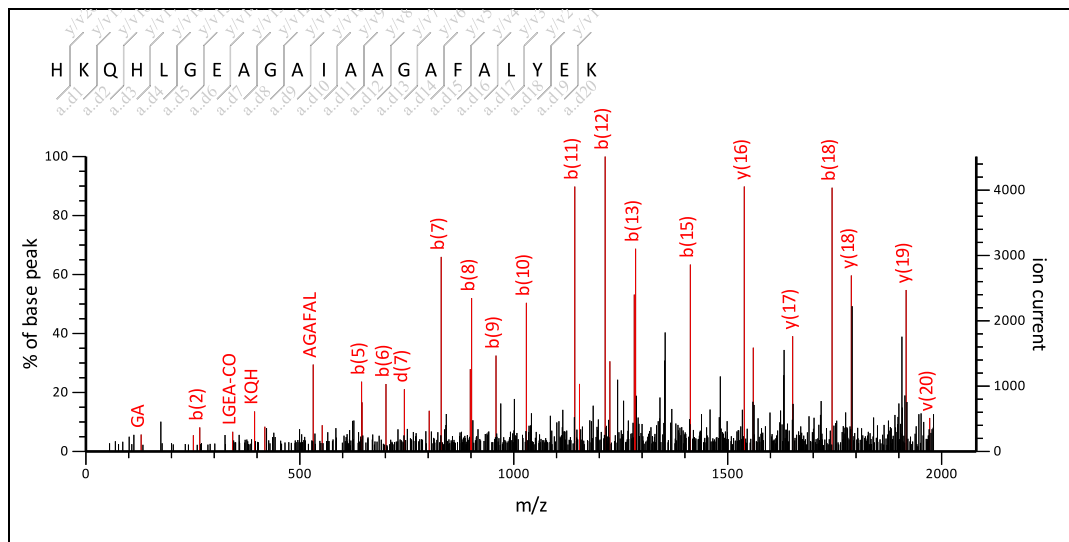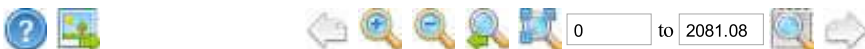

Label all possible matches  Label matches used for scoring

Monoisotopic mass of neutral peptide Mr(calc): 2181.1330

Fixed modifications: Carbamidomethyl (C) (apply to specified residues or termini only)

Ions Score: 131 Expect: 1.7e-09

Matches : 40/419 fragment ions using 40 most intense peaks [\(help\)](#)

| #  | Immon.   | a         | a*        | a <sup>0</sup> | b         | b*        | b <sup>0</sup> | d         | d'        | Seq. | v         | w         | w'        | y         | y*        |
|----|----------|-----------|-----------|----------------|-----------|-----------|----------------|-----------|-----------|------|-----------|-----------|-----------|-----------|-----------|
| 1  | 110.0713 | 110.0713  |           |                | 138.0662  |           |                | 44.0495   |           | H    |           |           |           |           |           |
| 2  | 101.1073 | 238.1662  | 221.1397  |                | 266.1612  | 249.1346  |                | 181.1084  |           | K    | 1971.9923 | 1970.9971 |           | 2045.0815 | 2028.0549 |
| 3  | 101.0709 | 366.2248  | 349.1983  |                | 394.2197  | 377.1932  |                | 309.2034  |           | Q    | 1843.9337 | 1842.9385 |           | 1916.9865 | 1899.9599 |
| 4  | 110.0713 | 503.2837  | 486.2572  |                | 531.2786  | 514.2521  |                |           |           | H    | 1706.8748 |           |           | 1788.9279 | 1771.9014 |
| 5  | 86.0964  | 616.3678  | 599.3412  |                | 644.3627  | 627.3362  |                | 574.3208  |           | L    | 1593.7908 | 1592.7955 |           | 1651.8690 | 1634.8425 |
| 6  | 30.0338  | 673.3893  | 656.3627  |                | 701.3842  | 684.3576  |                |           |           | G    |           |           |           | 1538.7849 | 1521.7584 |
| 7  | 102.0550 | 802.4318  | 785.4053  | 784.4213       | 830.4268  | 813.4002  | 812.4162       | 744.4264  |           | E    | 1407.7267 | 1406.7314 |           | 1481.7635 | 1464.7369 |
| 8  | 44.0495  | 873.4690  | 856.4424  | 855.4584       | 901.4639  | 884.4373  | 883.4533       |           |           | A    | 1336.6896 |           |           | 1352.7209 | 1335.6943 |
| 9  | 30.0338  | 930.4904  | 913.4639  | 912.4799       | 958.4853  | 941.4588  | 940.4748       |           |           | G    |           |           |           | 1281.6838 | 1264.6572 |
| 10 | 44.0495  | 1001.5275 | 984.5010  | 983.5170       | 1029.5225 | 1012.4959 | 1011.5119      |           |           | A    | 1208.6310 |           |           | 1224.6623 | 1207.6358 |
| 11 | 86.0964  | 1114.6116 | 1097.5851 | 1096.6010      | 1142.6065 | 1125.5800 | 1124.5960      | 1086.5803 | 1100.5960 | I    | 1095.5469 | 1108.5673 | 1122.5830 | 1153.6252 | 1136.5986 |
| 12 | 44.0495  | 1185.6487 | 1168.6222 | 1167.6382      | 1213.6436 | 1196.6171 | 1195.6331      |           |           | A    | 1024.5098 |           |           | 1040.5411 | 1023.5146 |
| 13 | 44.0495  | 1256.6858 | 1239.6593 | 1238.6753      | 1284.6807 | 1267.6542 | 1266.6702      |           |           | A    | 953.4727  |           |           | 969.5040  | 952.4775  |
| 14 | 30.0338  | 1313.7073 | 1296.6807 | 1295.6967      | 1341.7022 | 1324.6757 | 1323.6916      |           |           | G    |           |           |           | 898.4669  | 881.4403  |
| 15 | 44.0495  | 1384.7444 | 1367.7179 | 1366.7338      | 1412.7393 | 1395.7128 | 1394.7288      |           |           | A    | 825.4141  |           |           | 841.4454  | 824.4189  |
| 16 | 120.0808 | 1531.8128 | 1514.7863 | 1513.8023      | 1559.8077 | 1542.7812 | 1541.7972      |           |           | F    | 678.3457  |           |           | 770.4083  | 753.3818  |
| 17 | 44.0495  | 1602.8499 | 1585.8234 | 1584.8394      | 1630.8449 | 1613.8183 | 1612.8343      |           |           | A    | 607.3086  |           |           | 623.3399  | 606.3134  |
| 18 | 86.0964  | 1715.9340 | 1698.9075 | 1697.9234      | 1743.9289 | 1726.9024 | 1725.9184      | 1673.8871 |           | L    | 494.2245  | 493.2293  |           | 552.3028  | 535.2762  |
| 19 | 136.0757 | 1878.9973 | 1861.9708 | 1860.9868      | 1906.9922 | 1889.9657 | 1888.9817      |           |           | Y    | 331.1612  |           |           | 439.2187  | 422.1922  |
| 20 | 102.0550 | 2008.0399 | 1991.0134 | 1990.0294      | 2036.0348 | 2019.0083 | 2018.0243      | 1950.0344 |           | E    | 202.1186  | 201.1234  |           | 276.1554  | 259.1288  |
| 21 | 101.1073 |           |           |                |           |           |                |           |           | K    | 74.0237   | 73.0284   |           | 147.1128  | 130.0863  |

| Seq | ya | yb | Seq | ya | yb | Seq | ya | yb |
|-----|----|----|-----|----|----|-----|----|----|
|     |    |    |     |    |    |     |    |    |



|           |          |          |           |          |          |          |          |          |
|-----------|----------|----------|-----------|----------|----------|----------|----------|----------|
| KQ        | 229.1659 | 257.1608 | KQH       | 366.2248 | 394.2197 | KQHL     | 479.3089 | 507.3038 |
| KQHLG     | 536.3303 | 564.3253 | KQHLGE    | 665.3729 | 693.3679 | QH       | 238.1299 | 266.1248 |
| QHL       | 351.2139 | 379.2088 | QHLG      | 408.2354 | 436.2303 | QHLGE    | 537.2780 | 565.2729 |
| QHLGEA    | 608.3151 | 636.3100 | QHLGEAG   | 665.3366 | 693.3315 | HL       | 223.1553 | 251.1503 |
| HLG       | 280.1768 | 308.1717 | HLGE      | 409.2194 | 437.2143 | HLGEA    | 480.2565 | 508.2514 |
| HLGEAG    | 537.2780 | 565.2729 | HLGEAGA   | 608.3151 | 636.3100 | LG       | 143.1179 | 171.1128 |
| LGE       | 272.1605 | 300.1554 | LGEA      | 343.1976 | 371.1925 | LGEAG    | 400.2191 | 428.2140 |
| LGEAGA    | 471.2562 | 499.2511 | LGEAGAI   | 584.3402 | 612.3352 | LGEAGAIA | 655.3774 | 683.3723 |
| GE        | 159.0764 | 187.0713 | GEA       | 230.1135 | 258.1084 | GEAG     | 287.1350 | 315.1299 |
| GEAGA     | 358.1721 | 386.1670 | GEAGAI    | 471.2562 | 499.2511 | GEAGAIA  | 542.2933 | 570.2882 |
| GEAGAIAA  | 613.3304 | 641.3253 | GEAGAIAAG | 670.3519 | 698.3468 | EA       | 173.0921 | 201.0870 |
| EAG       | 230.1135 | 258.1084 | EAGA      | 301.1506 | 329.1456 | EAGAI    | 414.2347 | 442.2296 |
| EAGAIA    | 485.2718 | 513.2667 | EAGAIAA   | 556.3089 | 584.3039 | EAGAIAAG | 613.3304 | 641.3253 |
| EAGAIAAGA | 684.3675 | 712.3624 | AG        | 101.0709 | 129.0659 | AGA      | 172.1081 | 200.1030 |
| AGAI      | 285.1921 | 313.1870 | AGAIA     | 356.2292 | 384.2241 | AGAIAA   | 427.2663 | 455.2613 |
| AGAIAAG   | 484.2878 | 512.2827 | AGAIAAGA  | 555.3249 | 583.3198 | GA       | 101.0709 | 129.0659 |
| GAI       | 214.1550 | 242.1499 | GAIA      | 285.1921 | 313.1870 | GAIAA    | 356.2292 | 384.2241 |
| GAIAAG    | 413.2507 | 441.2456 | GAIAAGA   | 484.2878 | 512.2827 | GAIAAGAF | 631.3562 | 659.3511 |
| AI        | 157.1335 | 185.1285 | AIA       | 228.1707 | 256.1656 | AIAA     | 299.2078 | 327.2027 |
| AIAAG     | 356.2292 | 384.2241 | AIAAGA    | 427.2663 | 455.2613 | AIAAGAF  | 574.3348 | 602.3297 |
| AIAAGAFA  | 645.3719 | 673.3668 | IA        | 157.1335 | 185.1285 | IAA      | 228.1707 | 256.1656 |
| IAAG      | 285.1921 | 313.1870 | IAAGA     | 356.2292 | 384.2241 | IAAGAF   | 503.2976 | 531.2926 |
| IAAGAFA   | 574.3348 | 602.3297 | IAAGAFAL  | 687.4188 | 715.4137 | AA       | 115.0866 | 143.0815 |
| AAG       | 172.1081 | 200.1030 | AAGA      | 243.1452 | 271.1401 | AAGAF    | 390.2136 | 418.2085 |
| AAGAFA    | 461.2507 | 489.2456 | AAGAFAL   | 574.3348 | 602.3297 | AG       | 101.0709 | 129.0659 |
| AGA       | 172.1081 | 200.1030 | AGAF      | 319.1765 | 347.1714 | AGAFA    | 390.2136 | 418.2085 |
| AGAFAL    | 503.2976 | 531.2926 | AGAFALY   | 666.3610 | 694.3559 | GA       | 101.0709 | 129.0659 |
| GAF       | 248.1394 | 276.1343 | GAFAL     | 319.1765 | 347.1714 | GAFAL    | 432.2605 | 460.2554 |
| GAFALY    | 595.3239 | 623.3188 | AF        | 191.1179 | 219.1128 | AFA      | 262.1550 | 290.1499 |
| AFAL      | 375.2391 | 403.2340 | AFALY     | 538.3024 | 566.2973 | AFALYE   | 667.3450 | 695.3399 |
| FA        | 191.1179 | 219.1128 | FAL       | 304.2020 | 332.1969 | FALY     | 467.2653 | 495.2602 |
| FALYE     | 596.3079 | 624.3028 | AL        | 157.1335 | 185.1285 | ALY      | 320.1969 | 348.1918 |
| ALYE      | 449.2395 | 477.2344 | LY        | 249.1598 | 277.1547 | LYE      | 378.2023 | 406.1973 |
| YE        | 265.1183 | 293.1132 |           |          |          |          |          |          |

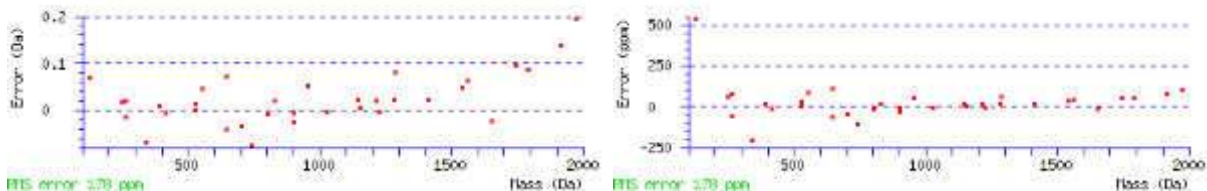

NCBI BLAST search of [HKQHLGEAGAIAAGAFALYEK](#)  
 (Parameters: blastp, nr protein database, expect=20000, no filter, PAM30)  
 Other BLAST [web gateways](#)

All matches to this query

| Score | Mr(calc)  | Delta   | Sequence                                |
|-------|-----------|---------|-----------------------------------------|
| 130.7 | 2181.1330 | 0.0880  | <a href="#">HKQHLGEAGAIAAGAFALYEK</a>   |
| 130.7 | 2181.1330 | 0.0880  | <a href="#">HKQHLGEAGALAAGAFALYEK</a>   |
| 29.5  | 2181.2344 | -0.0133 | <a href="#">MAIGAALGAAVSLALLVVWSPR</a>  |
| 25.2  | 2181.2382 | -0.0172 | <a href="#">GHTGHLLGGAGALAAVVVLEALR</a> |
| 25.1  | 2181.1688 | 0.0522  | <a href="#">HIAGMDNTLSLTQVGIRSLR</a>    |
| 21.9  | 2181.2018 | 0.0192  | <a href="#">QHQIASYLGITPTQLSRIR</a>     |
| 21.1  | 2181.0675 | 0.1535  | <a href="#">HQPAPLGPPAEOEGGOEGAERR</a>  |
| 20.8  | 2181.2020 | 0.0190  | <a href="#">LFIPYTAVALAGAVNVFLMR</a>    |
| 20.6  | 2181.1100 | 0.1111  | <a href="#">IGDNMLGISQLNDTVHVLDK</a>    |

|      |           |         |                                       |
|------|-----------|---------|---------------------------------------|
| 20.0 | 2181.2633 | -0.0423 | <a href="#">GLGFRLIVLALAAAAAEVEAR</a> |
|------|-----------|---------|---------------------------------------|

**Mascot:** <http://www.matrixscience.com>

**MATRIX SCIENCE Mascot Search Results**

**Peptide View Spot no 18**

MS/MS Fragmentation of **QHLGEAGAIAGAFALYEKHEAK**

Found in **gi|15667623** in **NCBI**nr, drought inducible 22 kD protein [Saccharum officinarum]

Match to Query 35: 2381.304724 from(2382.312000,1+) intensity(0.0000) index(15)

Title: Label: K8, Spot\_Id: 219796, Peak\_List\_Id: 226441, MSMS Job\_Run\_Id: 21844, Comment:

Data file C:\Documents and Settings\Administrator\Desktop\Farah-Garima 11May 2013\ppw\_K8\_136859930300.txt

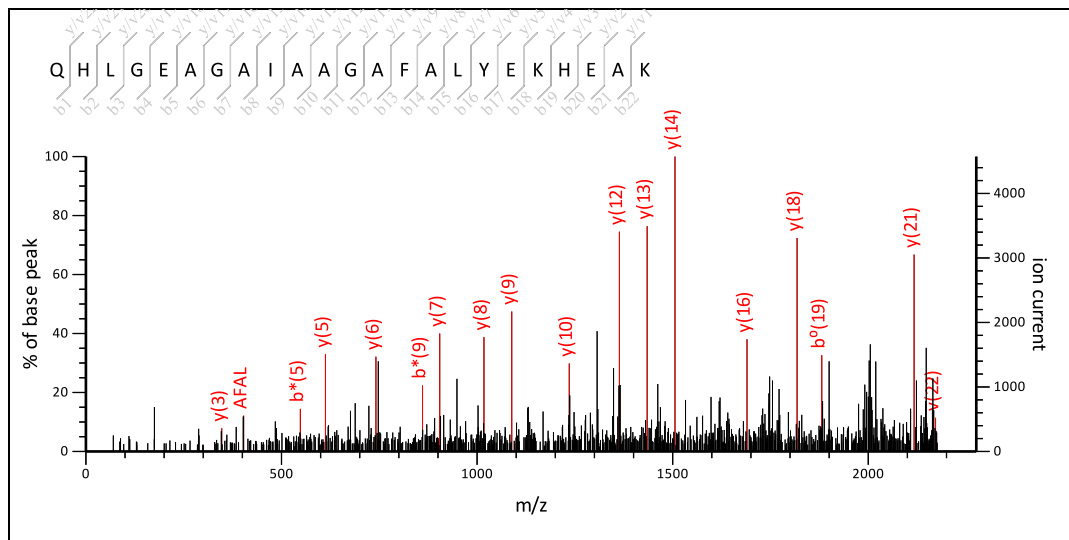

Navigation icons: Home, Back, Forward, Search, and a range input field from 0 to 2276.14.

Label all possible matches  Label matches used for scoring

Monoisotopic mass of neutral peptide Mr(calc): 2381.2127

Fixed modifications: Carbamidomethyl (C) (apply to specified residues or termini only)

Ions Score: 100 Expect: 1.9e-06

Matches : 21/456 fragment ions using 22 most intense peaks [\(help\)](#)

| #  | Immon.   | a         | a*        | a <sup>0</sup> | b         | b*        | b <sup>0</sup> | d         | d'       | Seq. | v         | w         | w'        | y         | y*        |
|----|----------|-----------|-----------|----------------|-----------|-----------|----------------|-----------|----------|------|-----------|-----------|-----------|-----------|-----------|
| 1  | 101.0709 | 101.0709  | 84.0444   |                | 129.0659  | 112.0393  |                | 44.0495   |          | Q    |           |           |           |           |           |
| 2  | 110.0713 | 238.1299  | 221.1033  |                | 266.1248  | 249.0982  |                |           |          | H    | 2172.1084 |           |           | 2254.1615 | 2237.1349 |
| 3  | 86.0964  | 351.2139  | 334.1874  |                | 379.2088  | 362.1823  |                | 309.1670  |          | L    | 2059.0243 | 2058.0291 |           | 2117.1026 | 2100.0760 |
| 4  | 30.0338  | 408.2354  | 391.2088  |                | 436.2303  | 419.2037  |                |           |          | G    |           |           |           | 2004.0185 | 1986.9920 |
| 5  | 102.0550 | 537.2780  | 520.2514  | 519.2674       | 565.2729  | 548.2463  | 547.2623       | 479.2725  |          | E    | 1872.9603 | 1871.9650 |           | 1946.9971 | 1929.9705 |
| 6  | 44.0495  | 608.3151  | 591.2885  | 590.3045       | 636.3100  | 619.2835  | 618.2994       |           |          | A    | 1801.9232 |           |           | 1817.9545 | 1800.9279 |
| 7  | 30.0338  | 665.3366  | 648.3100  | 647.3260       | 693.3315  | 676.3049  | 675.3209       |           |          | G    |           |           |           | 1746.9173 | 1729.8908 |
| 8  | 44.0495  | 736.3737  | 719.3471  | 718.3631       | 764.3686  | 747.3420  | 746.3580       |           |          | A    | 1673.8646 |           |           | 1689.8959 | 1672.8693 |
| 9  | 86.0964  | 849.4577  | 832.4312  | 831.4472       | 877.4526  | 860.4261  | 859.4421       | 821.4264  | 835.4421 | I    | 1560.7805 | 1573.8009 | 1587.8166 | 1618.8588 | 1601.8322 |
| 10 | 44.0495  | 920.4948  | 903.4683  | 902.4843       | 948.4898  | 931.4632  | 930.4792       |           |          | A    | 1489.7434 |           |           | 1505.7747 | 1488.7482 |
| 11 | 44.0495  | 991.5320  | 974.5054  | 973.5214       | 1019.5269 | 1002.5003 | 1001.5163      |           |          | A    | 1418.7063 |           |           | 1434.7376 | 1417.7110 |
| 12 | 30.0338  | 1048.5534 | 1031.5269 | 1030.5429      | 1076.5483 | 1059.5218 | 1058.5378      |           |          | G    |           |           |           | 1363.7005 | 1346.6739 |
| 13 | 44.0495  | 1119.5905 | 1102.5640 | 1101.5800      | 1147.5854 | 1130.5589 | 1129.5749      |           |          | A    | 1290.6477 |           |           | 1306.6790 | 1289.6525 |
| 14 | 120.0808 | 1266.6589 | 1249.6324 | 1248.6484      | 1294.6539 | 1277.6273 | 1276.6433      |           |          | F    | 1143.5793 |           |           | 1235.6419 | 1218.6154 |
| 15 | 44.0495  | 1337.6961 | 1320.6695 | 1319.6855      | 1365.6910 | 1348.6644 | 1347.6804      |           |          | A    | 1072.5422 |           |           | 1088.5735 | 1071.5469 |
| 16 | 86.0964  | 1450.7801 | 1433.7536 | 1432.7696      | 1478.7750 | 1461.7485 | 1460.7645      | 1408.7332 |          | L    | 959.4581  | 958.4629  |           | 1017.5364 | 1000.5098 |
| 17 | 136.0757 | 1613.8435 | 1596.8169 | 1595.8329      | 1641.8384 | 1624.8118 | 1623.8278      |           |          | Y    | 796.3948  |           |           | 904.4523  | 887.4258  |
| 18 | 102.0550 | 1742.8860 | 1725.8595 | 1724.8755      | 1770.8810 | 1753.8544 | 1752.8704      | 1684.8806 |          | E    | 667.3522  | 666.3570  |           | 741.3890  | 724.3624  |
| 19 | 101.1073 | 1870.9810 | 1853.9545 | 1852.9704      | 1898.9759 | 1881.9494 | 1880.9654      | 1813.9232 |          | K    | 539.2572  | 538.2620  |           | 612.3464  | 595.3198  |
| 20 | 110.0713 | 2008.0399 | 1991.0134 | 1990.0294      | 2036.0348 | 2019.0083 | 2018.0243      |           |          | H    | 402.1983  |           |           | 484.2514  | 467.2249  |
| 21 | 102.0550 | 2137.0825 | 2120.0560 | 2119.0720      | 2165.0774 | 2148.0509 | 2147.0669      | 2079.0770 |          | E    | 273.1557  | 272.1605  |           | 347.1925  | 330.1660  |
| 22 | 44.0495  | 2208.1196 | 2191.0931 | 2190.1091      | 2236.1145 | 2219.0880 | 2218.1040      |           |          | A    | 202.1186  |           |           | 218.1499  | 201.1234  |
| 23 | 101.1073 |           |           |                |           |           |                |           |          | K    | 74.0237   | 73.0284   |           | 147.1128  | 130.0863  |

| Seq      | ya       | yb       | Seq       | ya       | yb       | Seq       | ya       | yb       |
|----------|----------|----------|-----------|----------|----------|-----------|----------|----------|
| HL       | 223.1553 | 251.1503 | HLG       | 280.1768 | 308.1717 | HLGE      | 409.2194 | 437.2143 |
| HLGEA    | 480.2565 | 508.2514 | HLGEAG    | 537.2780 | 565.2729 | HLGEAGA   | 608.3151 | 636.3100 |
| LG       | 143.1179 | 171.1128 | LGE       | 272.1605 | 300.1554 | LGEA      | 343.1976 | 371.1925 |
| LGEAG    | 400.2191 | 428.2140 | LGEAGA    | 471.2562 | 499.2511 | LGEAGAI   | 584.3402 | 612.3352 |
| LGEAGAIA | 655.3774 | 683.3723 | GE        | 159.0764 | 187.0713 | GEA       | 230.1135 | 258.1084 |
| GEAG     | 287.1350 | 315.1299 | GEAGA     | 358.1721 | 386.1670 | GEAGAI    | 471.2562 | 499.2511 |
| GEAGAIA  | 542.2933 | 570.2882 | GEAGAIAA  | 613.3304 | 641.3253 | GEAGAIAAG | 670.3519 | 698.3468 |
| EA       | 173.0921 | 201.0870 | EAG       | 230.1135 | 258.1084 | EAGA      | 301.1506 | 329.1456 |
| EAGAI    | 414.2347 | 442.2296 | EAGAIA    | 485.2718 | 513.2667 | EAGAIAA   | 556.3089 | 584.3039 |
| EAGAIAAG | 613.3304 | 641.3253 | EAGAIAAGA | 684.3675 | 712.3624 | AG        | 101.0709 | 129.0659 |
| AGA      | 172.1081 | 200.1030 | AGAI      | 285.1921 | 313.1870 | AGAIA     | 356.2292 | 384.2241 |
| AGAIAA   | 427.2663 | 455.2613 | AGAIAAG   | 484.2878 | 512.2827 | AGAIAAGA  | 555.3249 | 583.3198 |
| GA       | 101.0709 | 129.0659 | GAI       | 214.1550 | 242.1499 | GAIA      | 285.1921 | 313.1870 |
| GAIAA    | 356.2292 | 384.2241 | GAIAAG    | 413.2507 | 441.2456 | GAIAAGA   | 484.2878 | 512.2827 |
| GAIAAGAF | 631.3562 | 659.3511 | AI        | 157.1335 | 185.1285 | AIA       | 228.1707 | 256.1656 |
| AIAA     | 299.2078 | 327.2027 | AIAAG     | 356.2292 | 384.2241 | AIAAGA    | 427.2663 | 455.2613 |
| AIAAGAF  | 574.3348 | 602.3297 | AIAAGAFA  | 645.3719 | 673.3668 | IA        | 157.1335 | 185.1285 |
| IAA      | 228.1707 | 256.1656 | IAAG      | 285.1921 | 313.1870 | IAAGA     | 356.2292 | 384.2241 |
| IAAGAF   | 503.2976 | 531.2926 | IAAGAFA   | 574.3348 | 602.3297 | IAAGAFAL  | 687.4188 | 715.4137 |
| AA       | 115.0866 | 143.0815 | AAG       | 172.1081 | 200.1030 | AAGA      | 243.1452 | 271.1401 |
| AAGAF    | 390.2136 | 418.2085 | AAGAFA    | 461.2507 | 489.2456 | AAGAFAL   | 574.3348 | 602.3297 |
| AG       | 101.0709 | 129.0659 | AGA       | 172.1081 | 200.1030 | AGAF      | 319.1765 | 347.1714 |
| AGAFA    | 390.2136 | 418.2085 | AGAFAL    | 503.2976 | 531.2926 | AGAFALY   | 666.3610 | 694.3559 |
| GA       | 101.0709 | 129.0659 | GAF       | 248.1394 | 276.1343 | GAFALY    | 319.1765 | 347.1714 |
| GAFAL    | 432.2605 | 460.2554 | GAFALY    | 595.3239 | 623.3188 | AF        | 191.1179 | 219.1128 |
| AFA      | 262.1550 | 290.1499 | AFAL      | 375.2391 | 403.2340 | AFALY     | 538.3024 | 566.2973 |
| AFALYE   | 667.3450 | 695.3399 | FA        | 191.1179 | 219.1128 | FAL       | 304.2020 | 332.1969 |
| FALY     | 467.2653 | 495.2602 | FALYE     | 596.3079 | 624.3028 | AL        | 157.1335 | 185.1285 |
| ALY      | 320.1969 | 348.1918 | ALYE      | 449.2395 | 477.2344 | ALYEK     | 577.3344 | 605.3293 |
| LY       | 249.1598 | 277.1547 | LYE       | 378.2023 | 406.1973 | LYEK      | 506.2973 | 534.2922 |
| LYEKH    | 643.3562 | 671.3511 | YE        | 265.1183 | 293.1132 | YEK       | 393.2132 | 421.2082 |
| YEKH     | 530.2722 | 558.2671 | YEKHE     | 659.3148 | 687.3097 | EK        | 230.1499 | 258.1448 |
| EKH      | 367.2088 | 395.2037 | EKHE      | 496.2514 | 524.2463 | EKHEA     | 567.2885 | 595.2835 |
| KH       | 238.1662 | 266.1612 | KHE       | 367.2088 | 395.2037 | KHEA      | 438.2459 | 466.2409 |
| HE       | 239.1139 | 267.1088 | HEA       | 310.1510 | 338.1459 | EA        | 173.0921 | 201.0870 |

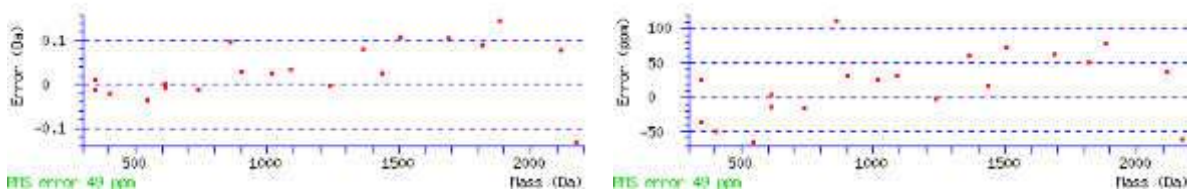

NCBI BLAST search of [OHLGEAGAIAAGAFALYEKHEAK](#)  
 (Parameters: blastp, nr protein database, expect=20000, no filter, PAM30)  
 Other BLAST [web gateways](#)

All matches to this query

| Score | Mr(calc)  | Delta  | Sequence                                |
|-------|-----------|--------|-----------------------------------------|
| 100.1 | 2381.2127 | 0.0920 | <a href="#">OHLGEAGAIAAGAFALYEKHEAK</a> |
| 100.1 | 2381.2127 | 0.0920 | <a href="#">OHLGEAGALAAGAFALYEKHEAK</a> |
| 17.7  | 2381.1971 | 0.1077 | <a href="#">MSVADLPTTALFOALLSGIMDR</a>  |
| 17.1  | 2381.1436 | 0.1611 | <a href="#">SDIVVMVATLAFGFACGEFGK</a>   |
| 16.4  | 2381.2664 | 0.0383 | <a href="#">LLEODYSVQFALALMLKDLR</a>    |
| 14.5  | 2381.1144 | 0.1903 | <a href="#">DVSHPNMGYAFKAVNGLEMTK</a>   |

|      |           |        |                                           |
|------|-----------|--------|-------------------------------------------|
| 12.9 | 2381.1719 | 0.1328 | <a href="#">HMNALLSKTATSDEGYVMLIR</a>     |
| 11.7 | 2381.1177 | 0.1870 | <a href="#">HSMAMVGMMAAKQLYVGEEAQAK</a>   |
| 11.5 | 2381.1256 | 0.1791 | <a href="#">AQC PDGYVGOFAADVDRMLLR</a>    |
| 11.5 | 2381.1733 | 0.1314 | <a href="#">GGSQTRVRFVFGAMAGGGCLLATLR</a> |

Mascot: <http://www.matrixscience.com/>

**MATRIX SCIENCE Mascot Search Results**

**Peptide View Spot no 19**

**MS/MS Fragmentation of SFGVLIPDQGIALR**

Found in **gi|115446541** in **NCBItr**, Os02g0537700 [Oryza sativa Japonica Group]

Match to Query 81: 1484.901924 from(1485.909200,1+) intensity(0.0000) index(13)

Title: Label: H17, Spot\_Id: 219937, Peak\_List\_Id: 228919, MSMS Job\_Run\_Id: 22005, Comment:

Data file C:\Documents and Settings\Administrator\Desktop\Farah-Garima 11May 2013\ppw\_H17\_136868316000.txt

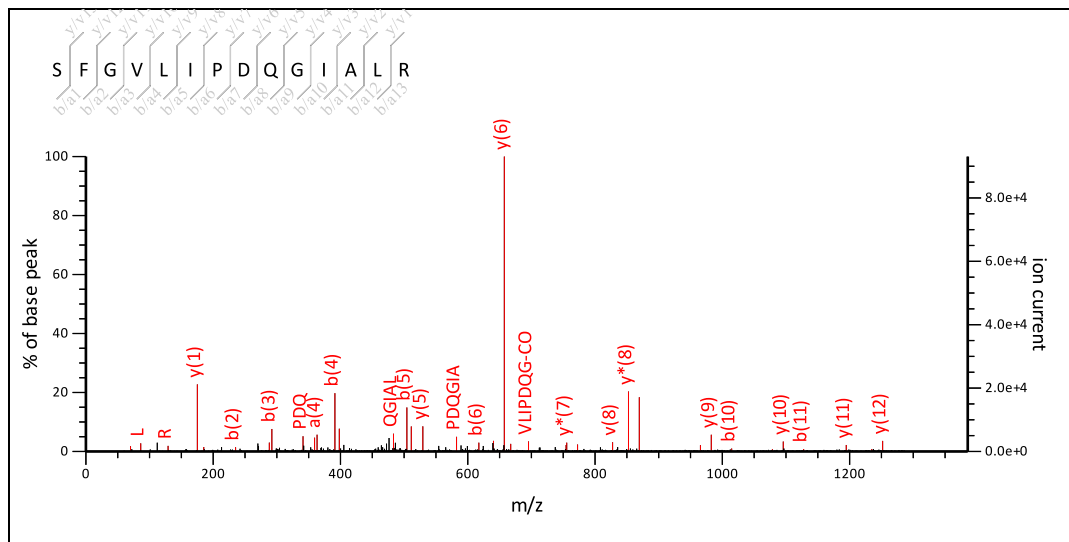

Navigation icons: Home, Back, Forward, Search, etc. Range: 0 to 1385.58

Label all possible matches  Label matches used for scoring

Monoisotopic mass of neutral peptide Mr(calc): 1484.8351

Fixed modifications: Carbamidomethyl (C) (apply to specified residues or termini only)

Ions Score: 90 Expect: 1.7e-05

Matches : 56/238 fragment ions using 52 most intense peaks [\(help\)](#)

| #  | Immon.   | a         | a*        | a <sup>0</sup> | b         | b*        | b <sup>0</sup> | d         | d'        | Seq. | v         | w         | w'       | y         | y*        |
|----|----------|-----------|-----------|----------------|-----------|-----------|----------------|-----------|-----------|------|-----------|-----------|----------|-----------|-----------|
| 1  | 60.0444  | 60.0444   |           | 42.0338        | 88.0393   |           | 70.0287        | 44.0495   |           | S    |           |           |          |           |           |
| 2  | 120.0808 | 207.1128  |           | 189.1022       | 235.1077  |           | 217.0972       |           |           | F    | 1306.7478 |           |          | 1398.8104 | 1381.7838 |
| 3  | 30.0338  | 264.1343  |           | 246.1237       | 292.1292  |           | 274.1186       |           |           | G    |           |           |          | 1251.7419 | 1234.7154 |
| 4  | 72.0808  | 363.2027  |           | 345.1921       | 391.1976  |           | 373.1870       | 349.1870  |           | V    | 1150.6579 | 1163.6783 |          | 1194.7205 | 1177.6939 |
| 5  | 86.0964  | 476.2867  |           | 458.2762       | 504.2817  |           | 486.2711       | 434.2398  |           | L    | 1037.5738 | 1036.5786 |          | 1095.6521 | 1078.6255 |
| 6  | 86.0964  | 589.3708  |           | 571.3602       | 617.3657  |           | 599.3552       | 561.3395  | 575.3552  | I    | 924.4898  | 937.5102  | 951.5258 | 982.5680  | 965.5415  |
| 7  | 70.0651  | 686.4236  |           | 668.4130       | 714.4185  |           | 696.4079       | 660.4079  |           | P    | 827.4370  | 826.4417  |          | 869.4839  | 852.4574  |
| 8  | 88.0393  | 801.4505  |           | 783.4400       | 829.4454  |           | 811.4349       | 757.4607  |           | D    | 712.4100  | 711.4148  |          | 772.4312  | 755.4046  |
| 9  | 101.0709 | 929.5091  | 912.4825  | 911.4985       | 957.5040  | 940.4775  | 939.4934       | 872.4876  |           | Q    | 584.3515  | 583.3562  |          | 657.4042  | 640.3777  |
| 10 | 30.0338  | 986.5306  | 969.5040  | 968.5200       | 1014.5255 | 997.4989  | 996.5149       |           |           | G    |           |           |          | 529.3457  | 512.3191  |
| 11 | 86.0964  | 1099.6146 | 1082.5881 | 1081.6041      | 1127.6095 | 1110.5830 | 1109.5990      | 1071.5833 | 1085.5990 | I    | 414.2459  | 427.2663  | 441.2820 | 472.3242  | 455.2976  |
| 12 | 44.0495  | 1170.6517 | 1153.6252 | 1152.6412      | 1198.6467 | 1181.6201 | 1180.6361      |           |           | A    | 343.2088  |           |          | 359.2401  | 342.2136  |
| 13 | 86.0964  | 1283.7358 | 1266.7093 | 1265.7252      | 1311.7307 | 1294.7042 | 1293.7201      | 1241.6889 |           | L    | 230.1248  | 229.1295  |          | 288.2030  | 271.1765  |
| 14 | 129.1135 |           |           |                |           |           |                |           |           | R    | 74.0237   | 73.0284   |          | 175.1190  | 158.0924  |

| Seq    | ya       | yb       | Seq     | ya       | yb       | Seq   | ya       | yb       |
|--------|----------|----------|---------|----------|----------|-------|----------|----------|
| FG     | 177.1022 | 205.0972 | FGV     | 276.1707 | 304.1656 | FGVL  | 389.2547 | 417.2496 |
| FGVLI  | 502.3388 | 530.3337 | FGVLIP  | 599.3915 | 627.3865 | GV    | 129.1022 | 157.0972 |
| GVL    | 242.1863 | 270.1812 | GVLI    | 355.2704 | 383.2653 | GVLIP | 452.3231 | 480.3180 |
| GVLIPD | 567.3501 | 595.3450 | GVLIPDQ | 695.4087 | 723.4036 | VL    | 185.1648 | 213.1598 |
| VLI    | 298.2489 | 326.2438 | VLIP    | 395.3017 | 423.2966 | VLIPD | 510.3286 | 538.3235 |
| VLIPDQ | 638.3872 | 666.3821 | VLIPDQG | 695.4087 | 723.4036 | LI    | 199.1805 | 227.1754 |
| LIP    | 296.2333 | 324.2282 | LIPD    | 411.2602 | 439.2551 | LIPDQ | 539.3188 | 567.3137 |

|         |          |          |       |          |          |        |          |          |
|---------|----------|----------|-------|----------|----------|--------|----------|----------|
| LIPDQG  | 596.3402 | 624.3352 | IP    | 183.1492 | 211.1441 | IPD    | 298.1761 | 326.1710 |
| IPDQ    | 426.2347 | 454.2296 | IPDQG | 483.2562 | 511.2511 | IPDQGI | 596.3402 | 624.3352 |
| IPDQGIA | 667.3774 | 695.3723 | PD    | 185.0921 | 213.0870 | PDQ    | 313.1506 | 341.1456 |
| PDQG    | 370.1721 | 398.1670 | PDQGI | 483.2562 | 511.2511 | PDQGIA | 554.2933 | 582.2882 |
| PDQGIAL | 667.3774 | 695.3723 | DQ    | 216.0979 | 244.0928 | DQG    | 273.1193 | 301.1143 |
| DQGI    | 386.2034 | 414.1983 | DQGIA | 457.2405 | 485.2354 | DQGIAL | 570.3246 | 598.3195 |
| QG      | 158.0924 | 186.0873 | QGI   | 271.1765 | 299.1714 | QGIA   | 342.2136 | 370.2085 |
| QGIAL   | 455.2976 | 483.2926 | GI    | 143.1179 | 171.1128 | GIA    | 214.1550 | 242.1499 |
| GIAL    | 327.2391 | 355.2340 | IA    | 157.1335 | 185.1285 | IAL    | 270.2176 | 298.2125 |
| AL      | 157.1335 | 185.1285 |       |          |          |        |          |          |

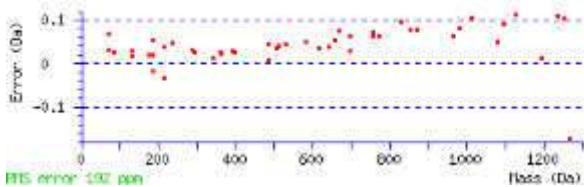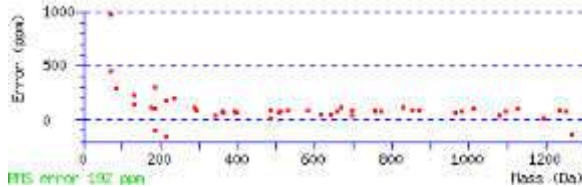

NCBI BLAST search of [SFGVLIPDQGIALR](#)

(Parameters: blastp, nr protein database, expect=20000, no filter, PAM30)

Other BLAST [web gateways](#)

All matches to this query

| Score | Mr(calc)  | Delta  | Sequence                       |
|-------|-----------|--------|--------------------------------|
| 90.4  | 1484.8351 | 0.0668 | <a href="#">SFGVLIPDQGIALR</a> |
| 32.3  | 1484.8674 | 0.0345 | <a href="#">SSLALAVARLIESR</a> |
| 32.0  | 1484.7835 | 0.1185 | <a href="#">VTSAIANVLPDETR</a> |
| 30.4  | 1484.8212 | 0.0807 | <a href="#">FSRIIVSASHVNR</a>  |
| 30.4  | 1484.8576 | 0.0444 | <a href="#">HPRLLTITEHIR</a>   |
| 30.4  | 1484.8212 | 0.0807 | <a href="#">SFRLLSOLTOHR</a>   |
| 30.0  | 1484.8861 | 0.0158 | <a href="#">LSSIAAVRIVAMVR</a> |
| 29.9  | 1484.7697 | 0.1322 | <a href="#">MSRLFAFLIDEK</a>   |
| 29.9  | 1484.8562 | 0.0457 | <a href="#">LVOHTSNILDTR</a>   |
| 27.7  | 1484.7875 | 0.1144 | <a href="#">FDKILTITYESR</a>   |

Mascot: <http://www.matrixscience.com/>



**MATRIX SCIENCE Mascot Search Results**

**Peptide View Spot no 19**

MS/MS Fragmentation of **APDFDAEAVFDQEFINVK**

Found in **gi|115446541** in **NCBI nr**, Os02g0537700 [Oryza sativa Japonica Group]

Match to Query 92: 2054.045724 from(2055.053000,1+) intensity(0.0000) index(18)

Title: Label: H17, Spot\_Id: 219937, Peak\_List\_Id: 228922, MSMS Job\_Run\_Id: 22005, Comment:

Data file C:\Documents and Settings\Administrator\Desktop\Farah-Garima 11May 2013\ppw\_H17\_136868316000.txt

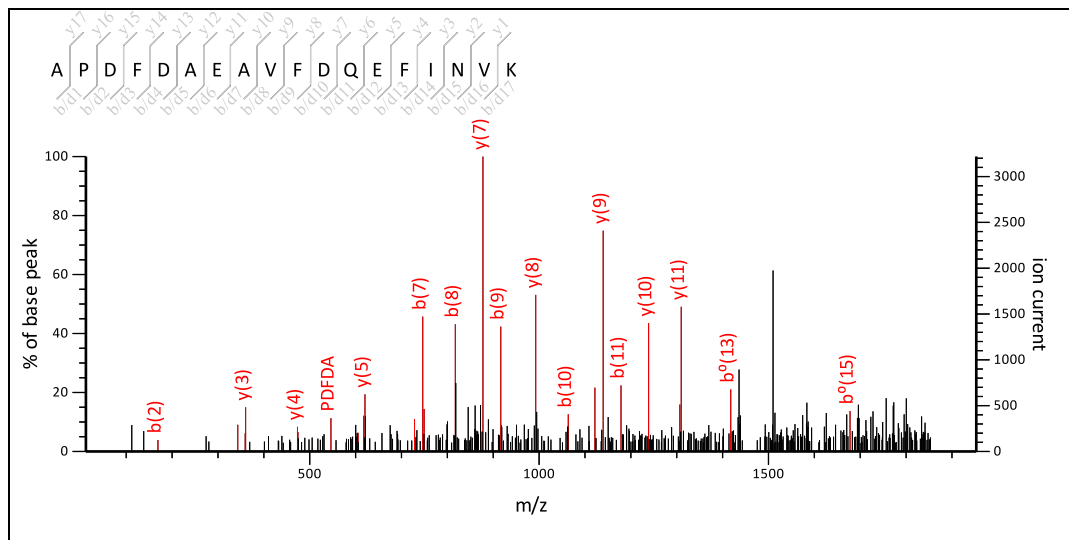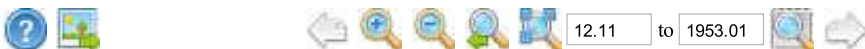

Label all possible matches  Label matches used for scoring

Monoisotopic mass of neutral peptide Mr(calc): 2053.9633

Fixed modifications: Carbamidomethyl (C) (apply to specified residues or termini only)

Ions Score: 50 Expect: 0.28

Matches : 33/305 fragment ions using 53 most intense peaks [\(help\)](#)

| #  | Immon.   | a         | a*        | a <sup>0</sup> | b         | b*        | b <sup>0</sup> | d         | d'        | Seq. | v         | w         | w'       | y         | y*        |
|----|----------|-----------|-----------|----------------|-----------|-----------|----------------|-----------|-----------|------|-----------|-----------|----------|-----------|-----------|
| 1  | 44.0495  | 44.0495   |           |                | 72.0444   |           |                | 44.0495   |           | A    |           |           |          |           |           |
| 2  | 70.0651  | 141.1022  |           |                | 169.0972  |           |                | 115.0866  |           | P    | 1941.8865 | 1940.8913 |          | 1983.9335 | 1966.9069 |
| 3  | 88.0393  | 256.1292  |           | 238.1186       | 284.1241  |           | 266.1135       | 212.1394  |           | D    | 1826.8596 | 1825.8643 |          | 1886.8807 | 1869.8541 |
| 4  | 120.0808 | 403.1976  |           | 385.1870       | 431.1925  |           | 413.1819       |           |           | F    | 1679.7911 |           |          | 1771.8537 | 1754.8272 |
| 5  | 88.0393  | 518.2245  |           | 500.2140       | 546.2195  |           | 528.2089       | 474.2347  |           | D    | 1564.7642 | 1563.7690 |          | 1624.7853 | 1607.7588 |
| 6  | 44.0495  | 589.2617  |           | 571.2511       | 617.2566  |           | 599.2460       |           |           | A    | 1493.7271 |           |          | 1509.7584 | 1492.7318 |
| 7  | 102.0550 | 718.3042  |           | 700.2937       | 746.2992  |           | 728.2886       | 660.2988  |           | E    | 1364.6845 | 1363.6892 |          | 1438.7213 | 1421.6947 |
| 8  | 44.0495  | 789.3414  |           | 771.3308       | 817.3363  |           | 799.3257       |           |           | A    | 1293.6474 |           |          | 1309.6787 | 1292.6521 |
| 9  | 72.0808  | 888.4098  |           | 870.3992       | 916.4047  |           | 898.3941       | 874.3941  |           | V    | 1194.5790 | 1207.5994 |          | 1238.6416 | 1221.6150 |
| 10 | 120.0808 | 1035.4782 |           | 1017.4676      | 1063.4731 |           | 1045.4625      |           |           | F    | 1047.5106 |           |          | 1139.5732 | 1122.5466 |
| 11 | 88.0393  | 1150.5051 |           | 1132.4946      | 1178.5000 |           | 1160.4895      | 1106.5153 |           | D    | 932.4836  | 931.4884  |          | 992.5047  | 975.4782  |
| 12 | 101.0709 | 1278.5637 | 1261.5372 | 1260.5531      | 1306.5586 | 1289.5321 | 1288.5481      | 1221.5422 |           | Q    | 804.4250  | 803.4298  |          | 877.4778  | 860.4512  |
| 13 | 102.0550 | 1407.6063 | 1390.5798 | 1389.5957      | 1435.6012 | 1418.5747 | 1417.5907      | 1349.6008 |           | E    | 675.3824  | 674.3872  |          | 749.4192  | 732.3927  |
| 14 | 120.0808 | 1554.6747 | 1537.6482 | 1536.6642      | 1582.6696 | 1565.6431 | 1564.6591      |           |           | F    | 528.3140  |           |          | 620.3766  | 603.3501  |
| 15 | 86.0964  | 1667.7588 | 1650.7322 | 1649.7482      | 1695.7537 | 1678.7271 | 1677.7431      | 1639.7275 | 1653.7431 | I    | 415.2300  | 428.2504  | 442.2660 | 473.3082  | 456.2817  |
| 16 | 87.0553  | 1781.8017 | 1764.7752 | 1763.7911      | 1809.7966 | 1792.7701 | 1791.7861      | 1738.7959 |           | N    | 301.1870  | 300.1918  |          | 360.2241  | 343.1976  |
| 17 | 72.0808  | 1880.8701 | 1863.8436 | 1862.8596      | 1908.8650 | 1891.8385 | 1890.8545      | 1866.8545 |           | V    | 202.1186  | 215.1390  |          | 246.1812  | 229.1547  |
| 18 | 101.1073 |           |           |                |           |           |                |           |           | K    | 74.0237   | 73.0284   |          | 147.1128  | 130.0863  |

| Seq   | ya       | yb       | Seq    | ya       | yb       | Seq   | ya       | yb       |
|-------|----------|----------|--------|----------|----------|-------|----------|----------|
| PD    | 185.0921 | 213.0870 | PDF    | 332.1605 | 360.1554 | PDFD  | 447.1874 | 475.1823 |
| PDFDA | 518.2245 | 546.2195 | PDFDAE | 647.2671 | 675.2620 | DF    | 235.1077 | 263.1026 |
| DFD   | 350.1347 | 378.1296 | DFDA   | 421.1718 | 449.1667 | DFDAE | 550.2144 | 578.2093 |

|                        |                          |                          |                        |                          |          |                        |                          |          |
|------------------------|--------------------------|--------------------------|------------------------|--------------------------|----------|------------------------|--------------------------|----------|
| <a href="#">DFDAEA</a> | 621.2515                 | 649.2464                 | <a href="#">FD</a>     | 235.1077                 | 263.1026 | <a href="#">FDA</a>    | 306.1448                 | 334.1397 |
| <a href="#">FDAE</a>   | 435.1874                 | 463.1823                 | <a href="#">FDAEA</a>  | 506.2245                 | 534.2195 | <a href="#">FDAEAV</a> | <a href="#">605.2930</a> | 633.2879 |
| <a href="#">DA</a>     | 159.0764                 | 187.0713                 | <a href="#">DAE</a>    | 288.1190                 | 316.1139 | <a href="#">DAEA</a>   | <a href="#">359.1561</a> | 387.1510 |
| <a href="#">DAEAV</a>  | 458.2245                 | 486.2195                 | <a href="#">DAEAVF</a> | <a href="#">605.2930</a> | 633.2879 | <a href="#">AE</a>     | 173.0921                 | 201.0870 |
| <a href="#">AEA</a>    | 244.1292                 | 272.1241                 | <a href="#">AEAV</a>   | <a href="#">343.1976</a> | 371.1925 | <a href="#">AEAVF</a>  | 490.2660                 | 518.2609 |
| <a href="#">AEAVFD</a> | <a href="#">605.2930</a> | 633.2879                 | <a href="#">EA</a>     | 173.0921                 | 201.0870 | <a href="#">EAV</a>    | 272.1605                 | 300.1554 |
| <a href="#">EAVF</a>   | 419.2289                 | 447.2238                 | <a href="#">EAVFD</a>  | 534.2558                 | 562.2508 | <a href="#">EAVFDQ</a> | 662.3144                 | 690.3093 |
| <a href="#">AV</a>     | 143.1179                 | 171.1128                 | <a href="#">AVF</a>    | 290.1863                 | 318.1812 | <a href="#">AVFD</a>   | 405.2132                 | 433.2082 |
| <a href="#">AVFDQ</a>  | 533.2718                 | 561.2667                 | <a href="#">AVFDQE</a> | 662.3144                 | 690.3093 | <a href="#">VF</a>     | 219.1492                 | 247.1441 |
| <a href="#">VFD</a>    | 334.1761                 | 362.1710                 | <a href="#">VFDQ</a>   | 462.2347                 | 490.2296 | <a href="#">VFDQE</a>  | 591.2773                 | 619.2722 |
| <a href="#">FD</a>     | 235.1077                 | 263.1026                 | <a href="#">FDQ</a>    | 363.1663                 | 391.1612 | <a href="#">FDQE</a>   | 492.2089                 | 520.2038 |
| <a href="#">FDQEF</a>  | 639.2773                 | 667.2722                 | <a href="#">DQ</a>     | 216.0979                 | 244.0928 | <a href="#">DQE</a>    | 345.1405                 | 373.1354 |
| <a href="#">DQEF</a>   | 492.2089                 | 520.2038                 | <a href="#">DQEFI</a>  | <a href="#">605.2930</a> | 633.2879 | <a href="#">QE</a>     | 230.1135                 | 258.1084 |
| <a href="#">QEF</a>    | 377.1819                 | 405.1769                 | <a href="#">QEFI</a>   | 490.2660                 | 518.2609 | <a href="#">QEFIN</a>  | 604.3089                 | 632.3039 |
| <a href="#">EF</a>     | 249.1234                 | 277.1183                 | <a href="#">EFI</a>    | 362.2074                 | 390.2023 | <a href="#">EFIN</a>   | 476.2504                 | 504.2453 |
| <a href="#">EFINV</a>  | 575.3188                 | 603.3137                 | <a href="#">FI</a>     | 233.1648                 | 261.1598 | <a href="#">FIN</a>    | 347.2078                 | 375.2027 |
| <a href="#">FINV</a>   | 446.2762                 | <a href="#">474.2711</a> | <a href="#">IN</a>     | 200.1394                 | 228.1343 | <a href="#">INV</a>    | 299.2078                 | 327.2027 |
| <a href="#">NV</a>     | 186.1237                 | 214.1186                 |                        |                          |          |                        |                          |          |

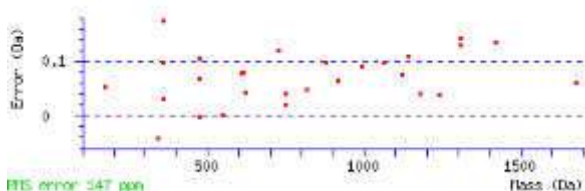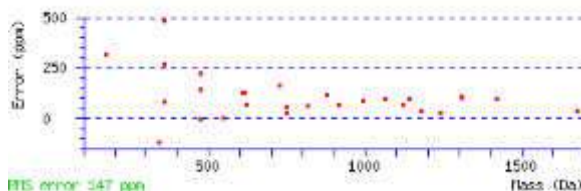

NCBI BLAST search of [APDFDAEAVFDQEFINVK](#)

(Parameters: blastp, nr protein database, expect=20000, no filter, PAM30)

Other BLAST [web gateways](#)

#### All matches to this query

| Score | Mr(calc)  | Delta   | Sequence                             |
|-------|-----------|---------|--------------------------------------|
| 49.5  | 2053.9633 | 0.0824  | <a href="#">APDFDAEAVFDQEFINVK</a>   |
| 14.1  | 2054.0507 | -0.0049 | <a href="#">ENHLPPIVFDMDTVGNLK</a>   |
| 13.6  | 2054.0029 | 0.0429  | <a href="#">HALTAVAVQTADETTADNAR</a> |
| 12.4  | 2053.9592 | 0.0865  | <a href="#">VVEYEAATEADFLAQADGR</a>  |
| 12.4  | 2054.0428 | 0.0030  | <a href="#">MDKILEAVMLSSYPTNVK</a>   |
| 12.2  | 2054.0684 | -0.0227 | <a href="#">SVLDGELSVYENLYLRGK</a>   |
| 11.7  | 2053.9819 | 0.0638  | <a href="#">QNQFDIAVMSALTYFYK</a>    |
| 10.8  | 2054.0652 | -0.0195 | <a href="#">VPPGLLVCRAMVAELEER</a>   |
| 10.3  | 2053.8964 | 0.1493  | <a href="#">EGSQSGEAFVELESEDDVK</a>  |
| 9.7   | 2053.9482 | 0.0975  | <a href="#">MVEMVTGEKTSLEEMGGAR</a>  |

Mascot: <http://www.matrixscience.com/>

**MATRIX SCIENCE Mascot Search Results**

**Peptide View Spot no 19**

MS/MS Fragmentation of **SGGLGDLKYPLISDVTK**

Found in **gi|115446541** in **NCBI nr**, Os02g0537700 [Oryza sativa Japonica Group]

Match to Query 88: 1762.020824 from(1763.028100,1+) intensity(0.0000) index(16)

Title: Label: H17, Spot\_Id: 219937, Peak\_List\_Id: 228921, MSMS Job\_Run\_Id: 22005, Comment:

Data file C:\Documents and Settings\Administrator\Desktop\Farah-Garima 11May 2013\ppw\_H17\_136868316000.txt

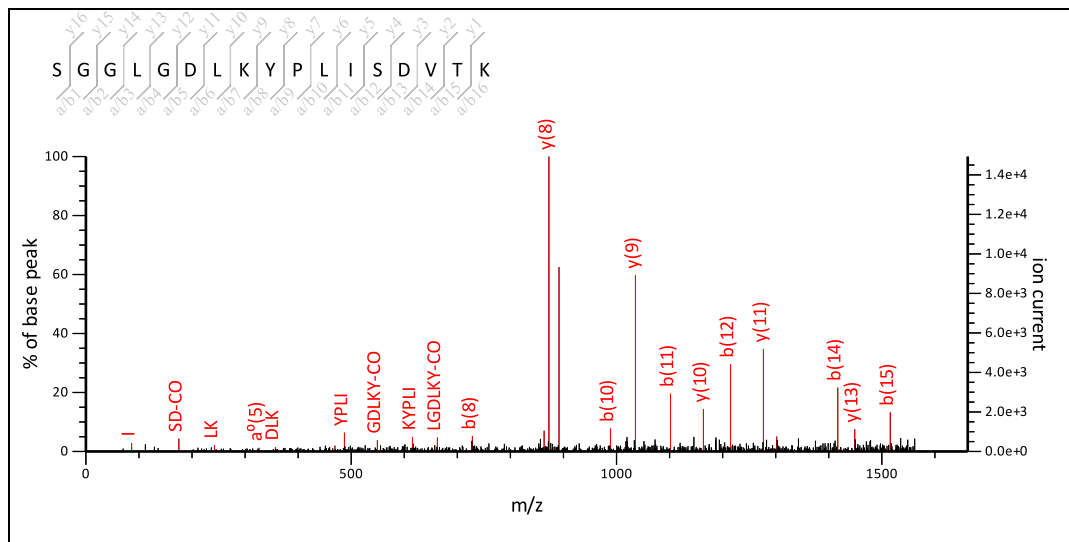

Navigation icons: Home, Back, Forward, Search, Print, Refresh. Search range: 0 to 1661.88

Label all possible matches  Label matches used for scoring

Monoisotopic mass of neutral peptide Mr(calc): 1761.9513

Fixed modifications: Carbamidomethyl (C) (apply to specified residues or termini only)

Ions Score: 71 Expect: 0.0018

Matches : 31/305 fragment ions using 30 most intense peaks (help)

| #  | Immon.   | a         | a*        | a <sup>0</sup> | b         | b*        | b <sup>0</sup> | d         | d'        | Seq. | v         | w         | w'       | y         | y*        |
|----|----------|-----------|-----------|----------------|-----------|-----------|----------------|-----------|-----------|------|-----------|-----------|----------|-----------|-----------|
| 1  | 60.0444  | 60.0444   |           | 42.0338        | 88.0393   |           | 70.0287        | 44.0495   |           | S    |           |           |          |           |           |
| 2  | 30.0338  | 117.0659  |           | 99.0553        | 145.0608  |           | 127.0502       |           |           | G    |           |           |          | 1675.9265 | 1658.9000 |
| 3  | 30.0338  | 174.0873  |           | 156.0768       | 202.0822  |           | 184.0717       |           |           | G    |           |           |          | 1618.9051 | 1601.8785 |
| 4  | 86.0964  | 287.1714  |           | 269.1608       | 315.1663  |           | 297.1557       | 245.1244  |           | L    | 1503.8053 | 1502.8101 |          | 1561.8836 | 1544.8570 |
| 5  | 30.0338  | 344.1928  |           | 326.1823       | 372.1878  |           | 354.1772       |           |           | G    |           |           |          | 1448.7995 | 1431.7730 |
| 6  | 88.0393  | 459.2198  |           | 441.2092       | 487.2147  |           | 469.2041       | 415.2300  |           | D    | 1331.7569 | 1330.7617 |          | 1391.7781 | 1374.7515 |
| 7  | 86.0964  | 572.3039  |           | 554.2933       | 600.2988  |           | 582.2882       | 530.2569  |           | L    | 1218.6729 | 1217.6776 |          | 1276.7511 | 1259.7246 |
| 8  | 101.1073 | 700.3988  | 683.3723  | 682.3882       | 728.3937  | 711.3672  | 710.3832       | 643.3410  |           | K    | 1090.5779 | 1089.5827 |          | 1163.6671 | 1146.6405 |
| 9  | 136.0757 | 863.4621  | 846.4356  | 845.4516       | 891.4571  | 874.4305  | 873.4465       |           |           | Y    | 927.5146  |           |          | 1035.5721 | 1018.5455 |
| 10 | 70.0651  | 960.5149  | 943.4884  | 942.5043       | 988.5098  | 971.4833  | 970.4993       | 934.4993  |           | P    | 830.4618  | 829.4666  |          | 872.5088  | 855.4822  |
| 11 | 86.0964  | 1073.5990 | 1056.5724 | 1055.5884      | 1101.5939 | 1084.5673 | 1083.5833      | 1031.5520 |           | L    | 717.3777  | 716.3825  |          | 775.4560  | 758.4294  |
| 12 | 86.0964  | 1186.6830 | 1169.6565 | 1168.6725      | 1214.6780 | 1197.6514 | 1196.6674      | 1158.6517 | 1172.6674 | I    | 604.2937  | 617.3141  | 631.3297 | 662.3719  | 645.3454  |
| 13 | 60.0444  | 1273.7151 | 1256.6885 | 1255.7045      | 1301.7100 | 1284.6834 | 1283.6994      | 1257.7201 |           | S    | 517.2617  | 516.2664  |          | 549.2879  | 532.2613  |
| 14 | 88.0393  | 1388.7420 | 1371.7155 | 1370.7314      | 1416.7369 | 1399.7104 | 1398.7264      | 1344.7522 |           | D    | 402.2347  | 401.2395  |          | 462.2558  | 445.2293  |
| 15 | 72.0808  | 1487.8104 | 1470.7839 | 1469.7999      | 1515.8053 | 1498.7788 | 1497.7948      | 1473.7948 |           | V    | 303.1663  | 316.1867  |          | 347.2289  | 330.2023  |
| 16 | 74.0600  | 1588.8581 | 1571.8316 | 1570.8475      | 1616.8530 | 1599.8265 | 1598.8425      | 1572.8632 | 1574.8425 | T    | 202.1186  | 215.1390  | 217.1183 | 248.1605  | 231.1339  |
| 17 | 101.1073 |           |           |                |           |           |                |           |           | K    | 74.0237   | 73.0284   |          | 147.1128  | 130.0863  |

| Seq   | ya       | yb       | Seq    | ya       | yb       | Seq     | ya       | yb       |
|-------|----------|----------|--------|----------|----------|---------|----------|----------|
| GG    | 87.0553  | 115.0502 | GGL    | 200.1394 | 228.1343 | GGLG    | 257.1608 | 285.1557 |
| GGLGD | 372.1878 | 400.1827 | GGLGDL | 485.2718 | 513.2667 | GGLGDLK | 613.3668 | 641.3617 |
| GL    | 143.1179 | 171.1128 | GLG    | 200.1394 | 228.1343 | GLGD    | 315.1663 | 343.1612 |
| GLGDL | 428.2504 | 456.2453 | GLGDLK | 556.3453 | 584.3402 | LG      | 143.1179 | 171.1128 |

|               |          |          |               |          |          |                |          |          |
|---------------|----------|----------|---------------|----------|----------|----------------|----------|----------|
| <b>LGD</b>    | 258.1448 | 286.1397 | <b>LGDL</b>   | 371.2289 | 399.2238 | <b>LGDLK</b>   | 499.3239 | 527.3188 |
| <b>LGDLKY</b> | 662.3872 | 690.3821 | <b>GD</b>     | 145.0608 | 173.0557 | <b>GDL</b>     | 258.1448 | 286.1397 |
| <b>GDLK</b>   | 386.2398 | 414.2347 | <b>GDLKY</b>  | 549.3031 | 577.2980 | <b>GDLKYP</b>  | 646.3559 | 674.3508 |
| <b>DL</b>     | 201.1234 | 229.1183 | <b>DLK</b>    | 329.2183 | 357.2132 | <b>DLKY</b>    | 492.2817 | 520.2766 |
| <b>DLKYP</b>  | 589.3344 | 617.3293 | <b>LK</b>     | 214.1914 | 242.1863 | <b>LKY</b>     | 377.2547 | 405.2496 |
| <b>LKYP</b>   | 474.3075 | 502.3024 | <b>LKYPL</b>  | 587.3915 | 615.3865 | <b>KY</b>      | 264.1707 | 292.1656 |
| <b>KYP</b>    | 361.2234 | 389.2183 | <b>KYPL</b>   | 474.3075 | 502.3024 | <b>KYPLI</b>   | 587.3915 | 615.3865 |
| <b>KYPLIS</b> | 674.4236 | 702.4185 | <b>YP</b>     | 233.1285 | 261.1234 | <b>YPL</b>     | 346.2125 | 374.2074 |
| <b>YPLI</b>   | 459.2966 | 487.2915 | <b>YPLIS</b>  | 546.3286 | 574.3235 | <b>YPLISD</b>  | 661.3556 | 689.3505 |
| <b>PL</b>     | 183.1492 | 211.1441 | <b>PLI</b>    | 296.2333 | 324.2282 | <b>PLIS</b>    | 383.2653 | 411.2602 |
| <b>PLISD</b>  | 498.2922 | 526.2871 | <b>PLISDV</b> | 597.3606 | 625.3556 | <b>PLISDVT</b> | 698.4083 | 726.4032 |
| <b>LI</b>     | 199.1805 | 227.1754 | <b>LIS</b>    | 286.2125 | 314.2074 | <b>LISD</b>    | 401.2395 | 429.2344 |
| <b>LISDV</b>  | 500.3079 | 528.3028 | <b>LISDVT</b> | 601.3556 | 629.3505 | <b>IS</b>      | 173.1285 | 201.1234 |
| <b>ISD</b>    | 288.1554 | 316.1503 | <b>ISDV</b>   | 387.2238 | 415.2187 | <b>ISDVT</b>   | 488.2715 | 516.2664 |
| <b>SD</b>     | 175.0713 | 203.0662 | <b>SDV</b>    | 274.1397 | 302.1347 | <b>SDVT</b>    | 375.1874 | 403.1823 |
| <b>DV</b>     | 187.1077 | 215.1026 | <b>DVT</b>    | 288.1554 | 316.1503 | <b>VT</b>      | 173.1285 | 201.1234 |

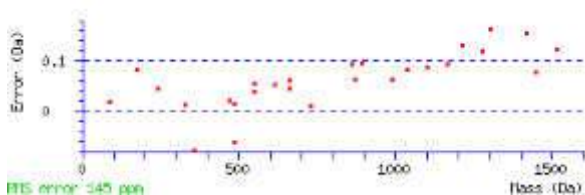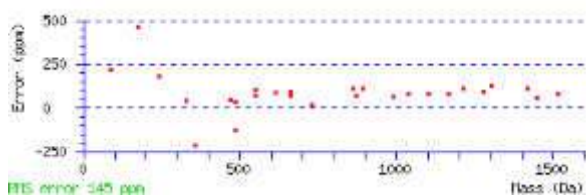

NCBI **BLAST** search of [SGGLGDLKYPLISDVTK](#)

(Parameters: blastp, nr protein database, expect=20000, no filter, PAM30)

Other BLAST [web gateways](#)

#### All matches to this query

| Score | Mr(calc)  | Delta  | Sequence                           |
|-------|-----------|--------|------------------------------------|
| 70.7  | 1761.9513 | 0.0696 | <a href="#">SGGLGDLKYPLISDVTK</a>  |
| 42.3  | 1761.9149 | 0.1059 | <a href="#">TGGLGDLNYPLISDVTK</a>  |
| 39.4  | 1761.9513 | 0.0696 | <a href="#">SGGLGDLKYPLVSDLTK</a>  |
| 24.4  | 1761.8897 | 0.1311 | <a href="#">IATTQKAWNSLSDAEK</a>   |
| 23.4  | 1761.9447 | 0.0761 | <a href="#">KPLYCDGGSGLTLLLR</a>   |
| 22.5  | 1761.8679 | 0.1529 | <a href="#">AAGMSDIOIQEELAKR</a>   |
| 22.0  | 1761.8614 | 0.1594 | <a href="#">AVGEQLCAAAAARGSMVR</a> |
| 19.6  | 1761.8872 | 0.1336 | <a href="#">FGGOPOLAMIFPLDGR</a>   |
| 19.5  | 1761.9586 | 0.0622 | <a href="#">MLPEEFKIPLTTSIK</a>    |
| 19.4  | 1761.9989 | 0.0219 | <a href="#">TIGSKQLTATLLDFVR</a>   |

Mascot: <http://www.matrixscience.com/>

**MATRIX SCIENCE Mascot Search Results**

**Peptide View Spot no 19**

MS/MS Fragmentation of **EGVIQHSTINNLAIGR**

Found in **gi|115446541** in **NCBInr**, Os02g0537700 [Oryza sativa Japonica Group]

Match to Query 86: 1721.003924 from(1722.011200,1+) intensity(0.0000) index(15)

Title: Label: H17, Spot\_Id: 219937, Peak\_List\_Id: 228932, MSMS Job\_Run\_Id: 22005, Comment:

Data file C:\Documents and Settings\Administrator\Desktop\Farah-Garima 11May 2013\ppw\_H17\_136868316000.txt

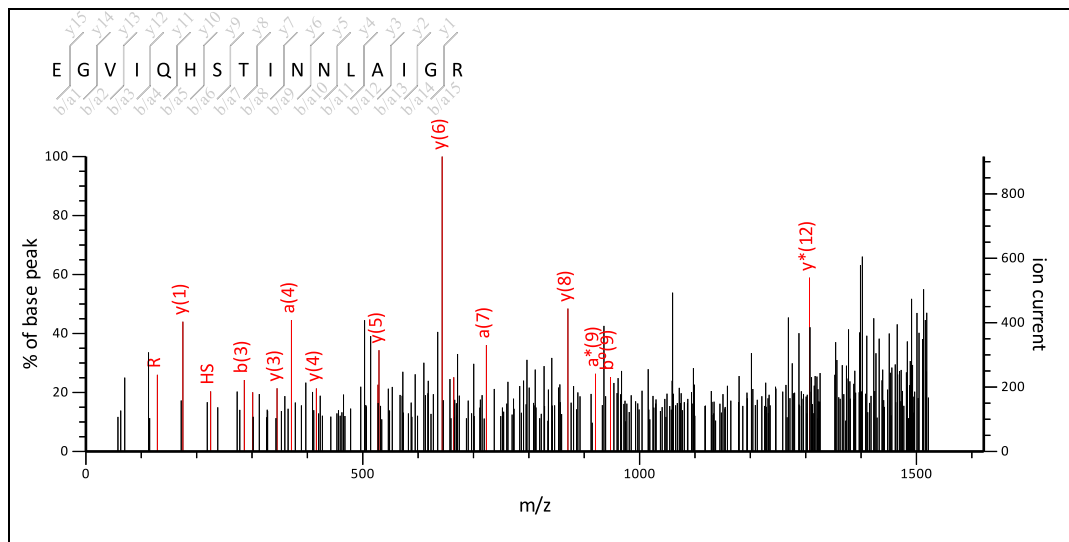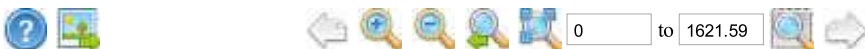

Label all possible matches  Label matches used for scoring

Monoisotopic mass of neutral peptide Mr(calc): 1720.9220

Fixed modifications: Carbamidomethyl (C) (apply to specified residues or termini only)

Ions Score: 11 Expect: 1.5e+03

Matches : 21/292 fragment ions using 60 most intense peaks [\(help\)](#)

| #  | Immon.          | a               | a*              | a <sup>0</sup> | b                | b*        | b <sup>0</sup>  | d         | d'        | Seq. | v         | w         | w'        | y               | y*               |
|----|-----------------|-----------------|-----------------|----------------|------------------|-----------|-----------------|-----------|-----------|------|-----------|-----------|-----------|-----------------|------------------|
| 1  | 102.0550        | 102.0550        |                 | 84.0444        | 130.0499         |           | 112.0393        | 44.0495   |           | E    |           |           |           |                 |                  |
| 2  | 30.0338         | 159.0764        |                 | 141.0659       | 187.0713         |           | 169.0608        |           |           | G    |           |           |           | 1592.8867       | 1575.8602        |
| 3  | 72.0808         | 258.1448        |                 | 240.1343       | <b>286.1397</b>  |           | 268.1292        | 244.1292  |           | V    | 1491.8027 | 1504.8231 |           | 1535.8653       | 1518.8387        |
| 4  | 86.0964         | <b>371.2289</b> |                 | 353.2183       | 399.2238         |           | 381.2132        | 343.1976  | 357.2132  | I    | 1378.7186 | 1391.7390 | 1405.7546 | 1436.7968       | 1419.7703        |
| 5  | 101.0709        | 499.2875        | 482.2609        | 481.2769       | <b>527.2824</b>  | 510.2558  | 509.2718        | 442.2660  |           | Q    | 1250.6600 | 1249.6648 |           | 1323.7128       | <b>1306.6862</b> |
| 6  | 110.0713        | 636.3464        | 619.3198        | 618.3358       | <b>664.3413</b>  | 647.3148  | 646.3307        |           |           | H    | 1113.6011 |           |           | 1195.6542       | 1178.6276        |
| 7  | 60.0444         | <b>723.3784</b> | 706.3519        | 705.3678       | 751.3733         | 734.3468  | 733.3628        | 707.3835  |           | S    | 1026.5691 | 1025.5738 |           | 1058.5953       | 1041.5687        |
| 8  | 74.0600         | 824.4261        | 807.3995        | 806.4155       | 852.4210         | 835.3945  | 834.4104        | 808.4312  | 810.4104  | T    | 925.5214  | 938.5418  | 940.5211  | 971.5633        | 954.5367         |
| 9  | 86.0964         | 937.5102        | <b>920.4836</b> | 919.4996       | 965.5051         | 948.4785  | <b>947.4945</b> | 909.4789  | 923.4945  | I    | 812.4373  | 825.4577  | 839.4734  | <b>870.5156</b> | 853.4890         |
| 10 | 87.0553         | 1051.5531       | 1034.5265       | 1033.5425      | 1079.5480        | 1062.5215 | 1061.5374       | 1008.5473 |           | N    | 698.3944  | 697.3991  |           | 757.4315        | 740.4050         |
| 11 | 87.0553         | 1165.5960       | 1148.5695       | 1147.5854      | 1193.5909        | 1176.5644 | 1175.5804       | 1122.5902 |           | N    | 584.3515  | 583.3562  |           | <b>643.3886</b> | 626.3620         |
| 12 | 86.0964         | 1278.6801       | 1261.6535       | 1260.6695      | <b>1306.6750</b> | 1289.6484 | 1288.6644       | 1236.6331 |           | L    | 471.2674  | 470.2722  |           | <b>529.3457</b> | 512.3191         |
| 13 | 44.0495         | 1349.7172       | 1332.6906       | 1331.7066      | 1377.7121        | 1360.6856 | 1359.7015       |           |           | A    | 400.2303  |           |           | <b>416.2616</b> | 399.2350         |
| 14 | 86.0964         | 1462.8013       | 1445.7747       | 1444.7907      | 1490.7962        | 1473.7696 | 1472.7856       | 1434.7700 | 1448.7856 | I    | 287.1462  | 300.1666  | 314.1823  | <b>345.2245</b> | 328.1979         |
| 15 | 30.0338         | 1519.8227       | 1502.7962       | 1501.8122      | 1547.8176        | 1530.7911 | 1529.8071       |           |           | G    |           |           |           | 232.1404        | 215.1139         |
| 16 | <b>129.1135</b> |                 |                 |                |                  |           |                 |           |           | R    | 74.0237   | 73.0284   |           | <b>175.1190</b> | 158.0924         |

| Seq   | ya              | yb       | Seq    | ya       | yb       | Seq     | ya       | yb       |
|-------|-----------------|----------|--------|----------|----------|---------|----------|----------|
| GV    | <b>129.1022</b> | 157.0972 | GVI    | 242.1863 | 270.1812 | GVIQ    | 370.2449 | 398.2398 |
| GVIQH | 507.3038        | 535.2987 | GVIQHS | 594.3358 | 622.3307 | GVIQHST | 695.3835 | 723.3784 |
| VI    | 185.1648        | 213.1598 | VIQ    | 313.2234 | 341.2183 | VIQH    | 450.2823 | 478.2772 |
| VIQHS | 537.3144        | 565.3093 | VIQHST | 638.3620 | 666.3570 | IQ      | 214.1550 | 242.1499 |
| IQH   | 351.2139        | 379.2088 | IQHS   | 438.2459 | 466.2409 | IQHST   | 539.2936 | 567.2885 |

|                |                 |                 |                |          |                 |                |          |          |
|----------------|-----------------|-----------------|----------------|----------|-----------------|----------------|----------|----------|
| <b>IQHSTI</b>  | 652.3777        | 680.3726        | <b>QH</b>      | 238.1299 | 266.1248        | <b>QHS</b>     | 325.1619 | 353.1568 |
| <b>QHST</b>    | 426.2096        | 454.2045        | <b>QHSTI</b>   | 539.2936 | 567.2885        | <b>QHSTIN</b>  | 653.3365 | 681.3315 |
| <b>HS</b>      | 197.1033        | <b>225.0982</b> | <b>HST</b>     | 298.1510 | 326.1459        | <b>HSTI</b>    | 411.2350 | 439.2300 |
| <b>HSTIN</b>   | 525.2780        | 553.2729        | <b>HSTINN</b>  | 639.3209 | 667.3158        | <b>ST</b>      | 161.0921 | 189.0870 |
| <b>STI</b>     | 274.1761        | 302.1710        | <b>STIN</b>    | 388.2191 | <b>416.2140</b> | <b>STINN</b>   | 502.2620 | 530.2569 |
| <b>STINNL</b>  | 615.3460        | <b>643.3410</b> | <b>STINNLA</b> | 686.3832 | 714.3781        | <b>TI</b>      | 187.1441 | 215.1390 |
| <b>TIN</b>     | <b>301.1870</b> | 329.1819        | <b>TINN</b>    | 415.2300 | 443.2249        | <b>TINNL</b>   | 528.3140 | 556.3089 |
| <b>TINNLA</b>  | 599.3511        | 627.3461        | <b>IN</b>      | 200.1394 | 228.1343        | <b>INN</b>     | 314.1823 | 342.1772 |
| <b>INNLA</b>   | 427.2663        | 455.2613        | <b>INNLA</b>   | 498.3035 | 526.2984        | <b>INNLAIG</b> | 611.3875 | 639.3824 |
| <b>INNLAIG</b> | 668.4090        | 696.4039        | <b>NN</b>      | 201.0982 | 229.0931        | <b>NNL</b>     | 314.1823 | 342.1772 |
| <b>NNLA</b>    | 385.2194        | 413.2143        | <b>NNLAI</b>   | 498.3035 | 526.2984        | <b>NNLAIG</b>  | 555.3249 | 583.3198 |
| <b>NL</b>      | 200.1394        | 228.1343        | <b>NLA</b>     | 271.1765 | 299.1714        | <b>NLAI</b>    | 384.2605 | 412.2554 |
| <b>NLAIG</b>   | 441.2820        | 469.2769        | <b>LA</b>      | 157.1335 | 185.1285        | <b>LAI</b>     | 270.2176 | 298.2125 |
| <b>LAIG</b>    | 327.2391        | 355.2340        | <b>AI</b>      | 157.1335 | 185.1285        | <b>AIG</b>     | 214.1550 | 242.1499 |
| <b>IG</b>      | 143.1179        | 171.1128        |                |          |                 |                |          |          |

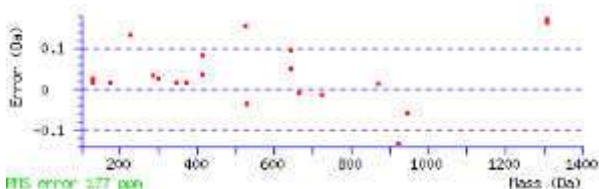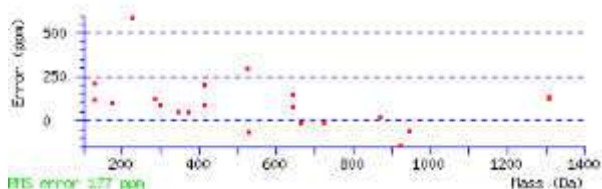

NCBI BLAST search of [EGVIOHSTINNLAIGR](#)

(Parameters: blastp, nr protein database, expect=20000, no filter, PAM30)

Other BLAST [web gateways](#)

#### All matches to this query

| Score | Mr(calc)  | Delta   | Sequence                          |
|-------|-----------|---------|-----------------------------------|
| 12.7  | 1720.9108 | 0.0932  | <a href="#">NANDQLPQKLPSPATK</a>  |
| 11.8  | 1720.8605 | 0.1434  | <a href="#">RDVSGGVGLAHSAPDR</a>  |
| 11.3  | 1720.9220 | 0.0819  | <a href="#">EGVIOHSTINNLAIGR</a>  |
| 9.2   | 1720.8566 | 0.1473  | <a href="#">QTFHEMAGLSITKSR</a>   |
| 9.1   | 1720.8488 | 0.1551  | <a href="#">QMVVASVGPTTSEMLR</a>  |
| 8.9   | 1721.0386 | -0.0347 | <a href="#">VTSIVVRPMLPPLKR</a>   |
| 8.5   | 1720.9624 | 0.0415  | <a href="#">ATGWVLVGPTPANIIGR</a> |
| 8.5   | 1720.9624 | 0.0415  | <a href="#">AWGTVLVGPTPANIIGR</a> |
| 8.5   | 1720.9625 | 0.0414  | <a href="#">AWGTVLVGPTPVNVVGR</a> |
| 8.5   | 1720.9948 | 0.0091  | <a href="#">RTGTVLVGPTPANIIGR</a> |

Mascot: <http://www.matrixscience.com/>



**MATRIX SCIENCE Mascot Search Results**

**Peptide View Spot no 19**

MS/MS Fragmentation of **GLFIIDKEGVIQHSTINNLAIGR**

Found in **gi|115446541** in **NCBI nr**, Os02g0537700 [Oryza sativa Japonica Group]

Match to Query 99: 2507.505424 from(2508.512700,1+) intensity(0.0000) index(20)

Title: Label: H17, Spot\_Id: 219937, Peak\_List\_Id: 228929, MSMS Job\_Run\_Id: 22005, Comment:

Data file C:\Documents and Settings\Administrator\Desktop\Farah-Garima 11May 2013\ppw\_H17\_136868316000.txt

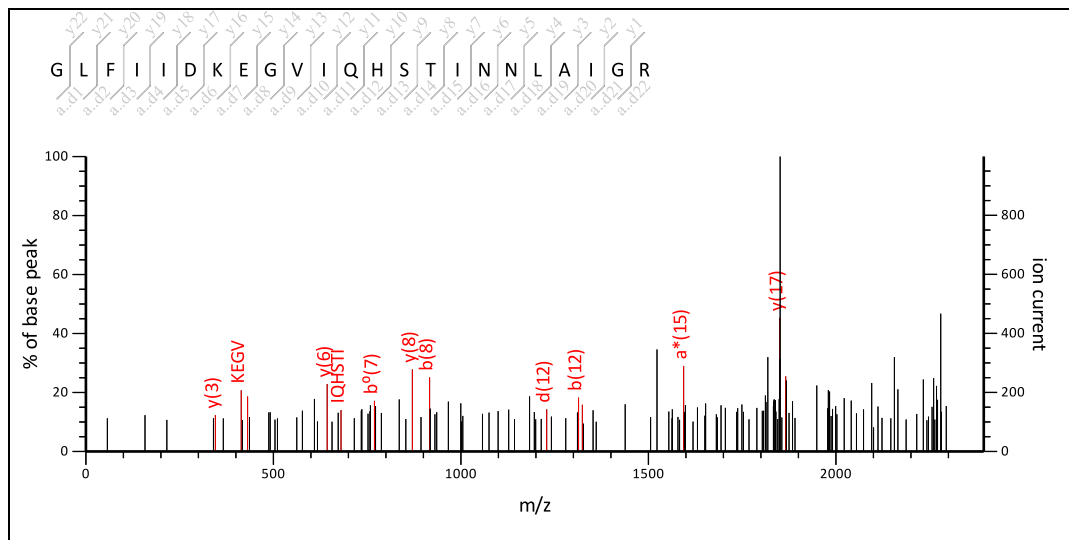

Navigation icons: Home, Back, Forward, Search, Print, etc. Range: 0 to 2394.22

Label all possible matches  Label matches used for scoring

Monoisotopic mass of neutral peptide Mr(calc): 2507.3860

Fixed modifications: Carbamidomethyl (C) (apply to specified residues or termini only)

Ions Score: 6 Expect: 2.6e+03

Matches : 17/437 fragment ions using 45 most intense peaks [\(help\)](#)

| #  | Immon.   | a         | a*               | a <sup>0</sup>  | b                | b*        | b <sup>0</sup>  | d                | d'        | Seq. | v         | w         | w'        | y                | y*        |
|----|----------|-----------|------------------|-----------------|------------------|-----------|-----------------|------------------|-----------|------|-----------|-----------|-----------|------------------|-----------|
| 1  | 30.0338  | 30.0338   |                  |                 | 58.0287          |           |                 | 44.0495          |           | G    |           |           |           |                  |           |
| 2  | 86.0964  | 143.1179  |                  |                 | 171.1128         |           |                 | 101.0709         |           | L    | 2393.2936 | 2392.2983 |           | 2451.3718        | 2434.3453 |
| 3  | 120.0808 | 290.1863  |                  |                 | 318.1812         |           |                 |                  |           | F    | 2246.2252 |           |           | 2338.2878        | 2321.2612 |
| 4  | 86.0964  | 403.2704  |                  |                 | <b>431.2653</b>  |           |                 | 375.2391         | 389.2547  | I    | 2133.1411 | 2146.1615 | 2160.1771 | 2191.2193        | 2174.1928 |
| 5  | 86.0964  | 516.3544  |                  |                 | 544.3493         |           |                 | 488.3231         | 502.3388  | I    | 2020.0570 | 2033.0774 | 2047.0931 | 2078.1353        | 2061.1087 |
| 6  | 88.0393  | 631.3814  |                  | 613.3708        | 659.3763         |           | 641.3657        | 587.3915         |           | D    | 1905.0301 | 1904.0348 |           | 1965.0512        | 1948.0247 |
| 7  | 101.1073 | 759.4763  | 742.4498         | 741.4658        | 787.4713         | 770.4447  | <b>769.4607</b> | 702.4185         |           | K    | 1776.9351 | 1775.9399 |           | <b>1850.0243</b> | 1832.9977 |
| 8  | 102.0550 | 888.5189  | 871.4924         | <b>870.5084</b> | <b>916.5138</b>  | 899.4873  | 898.5033        | 830.5135         |           | E    | 1647.8925 | 1646.8973 |           | 1721.9293        | 1704.9028 |
| 9  | 30.0338  | 945.5404  | 928.5138         | 927.5298        | 973.5353         | 956.5088  | 955.5247        |                  |           | G    |           |           |           | 1592.8867        | 1575.8602 |
| 10 | 72.0808  | 1044.6088 | 1027.5823        | 1026.5982       | 1072.6037        | 1055.5772 | 1054.5932       | 1030.5932        |           | V    | 1491.8027 | 1504.8231 |           | 1535.8653        | 1518.8387 |
| 11 | 86.0964  | 1157.6929 | 1140.6663        | 1139.6823       | 1185.6878        | 1168.6612 | 1167.6772       | 1129.6616        | 1143.6772 | I    | 1378.7186 | 1391.7390 | 1405.7546 | 1436.7968        | 1419.7703 |
| 12 | 101.0709 | 1285.7515 | 1268.7249        | 1267.7409       | <b>1313.7464</b> | 1296.7198 | 1295.7358       | <b>1228.7300</b> |           | Q    | 1250.6600 | 1249.6648 |           | <b>1323.7128</b> | 1306.6862 |
| 13 | 110.0713 | 1422.8104 | 1405.7838        | 1404.7998       | 1450.8053        | 1433.7787 | 1432.7947       |                  |           | H    | 1113.6011 |           |           | 1195.6542        | 1178.6276 |
| 14 | 60.0444  | 1509.8424 | 1492.8158        | 1491.8318       | 1537.8373        | 1520.8108 | 1519.8267       | 1493.8475        |           | S    | 1026.5691 | 1025.5738 |           | 1058.5953        | 1041.5687 |
| 15 | 74.0600  | 1610.8901 | <b>1593.8635</b> | 1592.8795       | 1638.8850        | 1621.8584 | 1620.8744       | 1594.8952        | 1596.8744 | T    | 925.5214  | 938.5418  | 940.5211  | 971.5633         | 954.5367  |
| 16 | 86.0964  | 1723.9741 | 1706.9476        | 1705.9636       | 1751.9690        | 1734.9425 | 1733.9585       | 1695.9428        | 1709.9585 | I    | 812.4373  | 825.4577  | 839.4734  | <b>870.5156</b>  | 853.4890  |
| 17 | 87.0553  | 1838.0171 | 1820.9905        | 1820.0065       | <b>1866.0120</b> | 1848.9854 | 1848.0014       | 1795.0112        |           | N    | 698.3944  | 697.3992  |           | 757.4315         | 740.4050  |
| 18 | 87.0553  | 1952.0600 | 1935.0334        | 1934.0494       | 1980.0549        | 1963.0284 | 1962.0443       | 1909.0542        |           | N    | 584.3515  | 583.3562  |           | <b>643.3886</b>  | 626.3620  |
| 19 | 86.0964  | 2065.1441 | 2048.1175        | 2047.1335       | 2093.1390        | 2076.1124 | 2075.1284       | 2023.0971        |           | L    | 471.2674  | 470.2722  |           | 529.3457         | 512.3191  |
| 20 | 44.0495  | 2136.1812 | 2119.1546        | 2118.1706       | 2164.1761        | 2147.1495 | 2146.1655       |                  |           | A    | 400.2303  |           |           | 416.2616         | 399.2350  |
| 21 | 86.0964  | 2249.2652 | 2232.2387        | 2231.2547       | 2277.2601        | 2260.2336 | 2259.2496       | 2221.2339        | 2235.2496 | I    | 287.1462  | 300.1666  | 314.1823  | <b>345.2245</b>  | 328.1979  |
| 22 | 30.0338  | 2306.2867 | 2289.2601        | 2288.2761       | 2334.2816        | 2317.2551 | 2316.2710       |                  |           | G    |           |           |           | 232.1404         | 215.1139  |
| 23 | 129.1135 |           |                  |                 |                  |           |                 |                  |           | R    | 74.0237   | 73.0284   |           | 175.1190         | 158.0924  |



| Seq     | ya       | yb       | Seq     | ya       | yb       | Seq     | ya       | yb       |
|---------|----------|----------|---------|----------|----------|---------|----------|----------|
| LF      | 233.1648 | 261.1598 | LFI     | 346.2489 | 374.2438 | LFII    | 459.3330 | 487.3279 |
| LFID    | 574.3599 | 602.3548 | FI      | 233.1648 | 261.1598 | FII     | 346.2489 | 374.2438 |
| FID     | 461.2758 | 489.2708 | FIDK    | 589.3708 | 617.3657 | II      | 199.1805 | 227.1754 |
| IID     | 314.2074 | 342.2023 | IDK     | 442.3024 | 470.2973 | IIDKE   | 571.3450 | 599.3399 |
| IIDKEG  | 628.3665 | 656.3614 | ID      | 201.1234 | 229.1183 | IDK     | 329.2183 | 357.2132 |
| IDKE    | 458.2609 | 486.2558 | IDKEG   | 515.2824 | 543.2773 | IDKEGV  | 614.3508 | 642.3457 |
| DK      | 216.1343 | 244.1292 | DKE     | 345.1769 | 373.1718 | DKEG    | 402.1983 | 430.1932 |
| DKEGV   | 501.2667 | 529.2617 | DKEGVI  | 614.3508 | 642.3457 | KE      | 230.1499 | 258.1448 |
| KEG     | 287.1714 | 315.1663 | KEGV    | 386.2398 | 414.2347 | KEGVI   | 499.3239 | 527.3188 |
| KEGVIQ  | 627.3824 | 655.3774 | EG      | 159.0764 | 187.0713 | EGV     | 258.1448 | 286.1397 |
| EGVI    | 371.2289 | 399.2238 | EGVIQ   | 499.2875 | 527.2824 | EGVIQH  | 636.3464 | 664.3413 |
| GV      | 129.1022 | 157.0972 | GVI     | 242.1863 | 270.1812 | GVIQ    | 370.2449 | 398.2398 |
| GVIQH   | 507.3038 | 535.2987 | GVIQHS  | 594.3358 | 622.3307 | GVIQHST | 695.3835 | 723.3784 |
| VI      | 185.1648 | 213.1598 | VIQ     | 313.2234 | 341.2183 | VIQH    | 450.2823 | 478.2772 |
| VIQHS   | 537.3144 | 565.3093 | VIQHST  | 638.3620 | 666.3570 | IQ      | 214.1550 | 242.1499 |
| IQH     | 351.2139 | 379.2088 | IQHS    | 438.2459 | 466.2409 | IQHST   | 539.2936 | 567.2885 |
| IQHSTI  | 652.3777 | 680.3726 | QH      | 238.1299 | 266.1248 | QHS     | 325.1619 | 353.1568 |
| QHST    | 426.2096 | 454.2045 | QHSTI   | 539.2936 | 567.2885 | QHSTIN  | 653.3365 | 681.3315 |
| HS      | 197.1033 | 225.0982 | HST     | 298.1510 | 326.1459 | HSTI    | 411.2350 | 439.2300 |
| HSTIN   | 525.2780 | 553.2729 | HSTINN  | 639.3209 | 667.3158 | ST      | 161.0921 | 189.0870 |
| STI     | 274.1761 | 302.1710 | STIN    | 388.2191 | 416.2140 | STINN   | 502.2620 | 530.2569 |
| STINNL  | 615.3461 | 643.3410 | STINNLA | 686.3832 | 714.3781 | TI      | 187.1441 | 215.1390 |
| TIN     | 301.1870 | 329.1819 | TINN    | 415.2300 | 443.2249 | TINNL   | 528.3140 | 556.3089 |
| TINNLA  | 599.3511 | 627.3461 | IN      | 200.1394 | 228.1343 | INN     | 314.1823 | 342.1772 |
| INN     | 427.2663 | 455.2613 | INNLA   | 498.3035 | 526.2984 | INNLA   | 611.3875 | 639.3824 |
| INNLAIG | 668.4090 | 696.4039 | NN      | 201.0982 | 229.0931 | NNL     | 314.1823 | 342.1772 |
| NNLA    | 385.2194 | 413.2143 | NNLAI   | 498.3035 | 526.2984 | NNLAIG  | 555.3249 | 583.3198 |
| NL      | 200.1394 | 228.1343 | NLA     | 271.1765 | 299.1714 | NLAI    | 384.2605 | 412.2554 |
| NLAIG   | 441.2820 | 469.2769 | LA      | 157.1335 | 185.1285 | LAI     | 270.2176 | 298.2125 |
| LAIG    | 327.2391 | 355.2340 | AI      | 157.1335 | 185.1285 | AIG     | 214.1550 | 242.1499 |
| IG      | 143.1179 | 171.1128 |         |          |          |         |          |          |

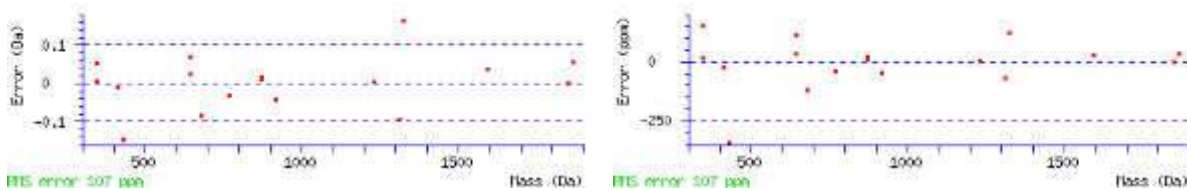

NCBI BLAST search of [GLFIIIDKEGVIOHSTINNLAIGR](#)  
 (Parameters: blastp, nr protein database, expect=20000, no filter, PAM30)  
 Other BLAST [web gateways](#)

All matches to this query

| Score | Mr(calcd) | Delta  | Sequence                                 |
|-------|-----------|--------|------------------------------------------|
| 5.6   | 2507.3860 | 0.1194 | <a href="#">GLFIIIDKEGVIOHSTINNLAIGR</a> |

Mascot: <http://www.matrixscience.com/>


**Mascot Search Results**
**Peptide View Spot no 19**
MS/MS Fragmentation of **TLQALQYVQDNPDEVCPGA WKPGDK**Found in **gi115446541** in **NCBIInr**, Os02g0537700 [Oryza sativa Japonica Group]

Match to Query 101: 2828.457824 from(2829.465100,1+) intensity(0.0000) index(21)

Title: Label: H17, Spot\_Id: 219937, Peak\_List\_Id: 228940, MSMS Job\_Run\_Id: 22005, Comment:

Data file C:\Documents and Settings\Administrator\Desktop\Farah-Garima 11May 2013\ppw\_H17\_136868316000.txt

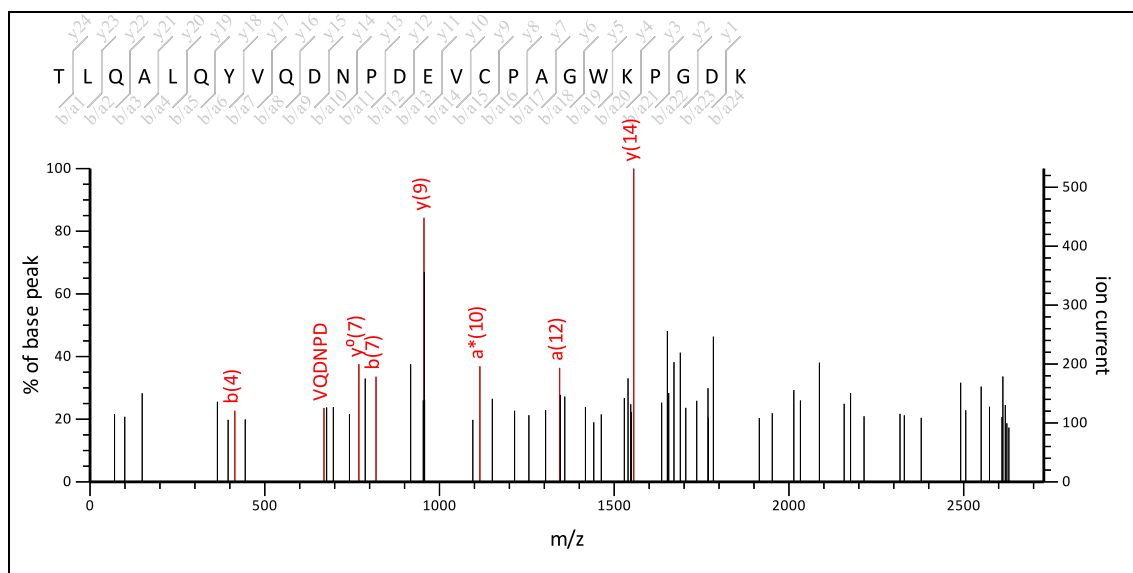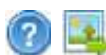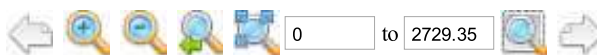Label all possible matches  Label matches used for scoring 

Monoisotopic mass of neutral peptide Mr(calc): 2828.3439

Fixed modifications: Carbamidomethyl (C) (apply to specified residues or termini only)

Ions Score: 5 Expect: 4.9e+03

Matches : 11/487 fragment ions using 23 most intense peaks ([help](#))

| #  | Immon.   | a                | a*               | a <sup>0</sup> | b               | b*        | b <sup>0</sup> | d         | Seq. | v         | w         | y                | y*        | y <sup>0</sup>  | #  |
|----|----------|------------------|------------------|----------------|-----------------|-----------|----------------|-----------|------|-----------|-----------|------------------|-----------|-----------------|----|
| 1  | 74.0600  | 74.0600          |                  | 56.0495        | 102.0550        |           | 84.0444        | 44.0495   | T    |           |           |                  |           |                 | 25 |
| 2  | 86.0964  | 187.1441         |                  | 169.1335       | 215.1390        |           | 197.1285       | 145.0972  | L    | 2670.2253 | 2669.2300 | 2728.3035        | 2711.2770 | 2710.2930       | 24 |
| 3  | 101.0709 | 315.2027         | 298.1761         | 297.1921       | 343.1976        | 326.1710  | 325.1870       | 258.1812  | Q    | 2542.1667 | 2541.1715 | 2615.2195        | 2598.1929 | 2597.2089       | 23 |
| 4  | 44.0495  | 386.2398         | 369.2132         | 368.2292       | <b>414.2347</b> | 397.2082  | 396.2241       |           | A    | 2471.1296 |           | 2487.1609        | 2470.1344 | 2469.1503       | 22 |
| 5  | 86.0964  | 499.3239         | 482.2973         | 481.3133       | 527.3188        | 510.2922  | 509.3082       | 457.2769  | L    | 2358.0455 | 2357.0503 | 2416.1238        | 2399.0972 | 2398.1132       | 21 |
| 6  | 101.0709 | 627.3824         | 610.3559         | 609.3719       | 655.3774        | 638.3508  | 637.3668       | 570.3610  | Q    | 2229.9870 | 2228.9917 | 2303.0397        | 2286.0132 | 2285.0292       | 20 |
| 7  | 136.0757 | 790.4458         | 773.4192         | 772.4352       | <b>818.4407</b> | 801.4141  | 800.4301       |           | Y    | 2066.9236 |           | 2174.9811        | 2157.9546 | 2156.9706       | 19 |
| 8  | 72.0808  | 889.5142         | 872.4876         | 871.5036       | 917.5091        | 900.4825  | 899.4985       | 875.4985  | V    | 1967.8552 | 1980.8756 | 2011.9178        | 1994.8913 | 1993.9073       | 18 |
| 9  | 101.0709 | 1017.5728        | 1000.5462        | 999.5622       | 1045.5677       | 1028.5411 | 1027.5571      | 960.5513  | Q    | 1839.7966 | 1838.8014 | 1912.8494        | 1895.8229 | 1894.8388       | 17 |
| 10 | 88.0393  | 1132.5997        | <b>1115.5732</b> | 1114.5891      | 1160.5946       | 1143.5681 | 1142.5841      | 1088.6099 | D    | 1724.7697 | 1723.7744 | 1784.7908        | 1767.7643 | 1766.7803       | 16 |
| 11 | 87.0553  | 1246.6426        | 1229.6161        | 1228.6321      | 1274.6375       | 1257.6110 | 1256.6270      | 1203.6368 | N    | 1610.7268 | 1609.7315 | 1669.7639        | 1652.7373 | 1651.7533       | 15 |
| 12 | 70.0651  | <b>1343.6954</b> | 1326.6688        | 1325.6848      | 1371.6903       | 1354.6638 | 1353.6797      | 1317.6797 | P    | 1513.6740 | 1512.6788 | <b>1555.7210</b> | 1538.6944 | 1537.7104       | 14 |
| 13 | 88.0393  | 1458.7223        | 1441.6958        | 1440.7118      | 1486.7173       | 1469.6907 | 1468.7067      | 1414.7325 | D    | 1398.6471 | 1397.6518 | 1458.6682        | 1441.6416 | 1440.6576       | 13 |
| 14 | 102.0550 | 1587.7649        | 1570.7384        | 1569.7544      | 1615.7598       | 1598.7333 | 1597.7493      | 1529.7595 | E    | 1269.6045 | 1268.6092 | <b>1343.6412</b> | 1326.6147 | 1325.6307       | 12 |
| 15 | 72.0808  | 1686.8333        | 1669.8068        | 1668.8228      | 1714.8283       | 1697.8017 | 1696.8177      | 1672.8177 | V    | 1170.5361 | 1183.5565 | 1214.5987        | 1197.5721 | 1196.5881       | 11 |
| 16 | 133.0430 | 1846.8640        | 1829.8374        | 1828.8534      | 1874.8589       | 1857.8324 | 1856.8483      | 1757.8705 | C    | 1010.5054 | 1009.5102 | <b>1115.5302</b> | 1098.5037 | 1097.5197       | 10 |
| 17 | 70.0651  | 1943.9168        | 1926.8902        | 1925.9062      | 1971.9117       | 1954.8851 | 1953.9011      | 1917.9011 | P    | 913.4526  | 912.4574  | <b>955.4996</b>  | 938.4730  | 937.4890        | 9  |
| 18 | 44.0495  | 2014.9539        | 1997.9273        | 1996.9433      | 2042.9488       | 2025.9222 | 2024.9382      |           | A    | 842.4155  |           | 858.4468         | 841.4203  | 840.4363        | 8  |
| 19 | 30.0338  | 2071.9753        | 2054.9488        | 2053.9648      | 2099.9702       | 2082.9437 | 2081.9597      |           | G    |           |           | 787.4097         | 770.3832  | <b>769.3992</b> | 7  |

|    |          |           |           |           |           |           |           |           |   |          |          |          |          |          |   |
|----|----------|-----------|-----------|-----------|-----------|-----------|-----------|-----------|---|----------|----------|----------|----------|----------|---|
| 20 | 159.0917 | 2258.0546 | 2241.0281 | 2240.0441 | 2286.0496 | 2269.0230 | 2268.0390 |           | W | 599.3148 |          | 730.3883 | 713.3617 | 712.3777 | 6 |
| 21 | 101.1073 | 2386.1496 | 2369.1231 | 2368.1390 | 2414.1445 | 2397.1180 | 2396.1340 | 2329.0918 | K | 471.2198 | 470.2245 | 544.3089 | 527.2824 | 526.2984 | 5 |
| 22 | 70.0651  | 2483.2024 | 2466.1758 | 2465.1918 | 2511.1973 | 2494.1707 | 2493.1867 | 2457.1867 | P | 374.1670 | 373.1718 | 416.2140 | 399.1874 | 398.2034 | 4 |
| 23 | 30.0338  | 2540.2238 | 2523.1973 | 2522.2133 | 2568.2188 | 2551.1922 | 2550.2082 |           | G |          |          | 319.1612 | 302.1347 | 301.1506 | 3 |
| 24 | 88.0393  | 2655.2508 | 2638.2242 | 2637.2402 | 2683.2457 | 2666.2191 | 2665.2351 | 2611.2610 | D | 202.1186 | 201.1234 | 262.1397 | 245.1132 | 244.1292 | 2 |
| 25 | 101.1073 |           |           |           |           |           |           |           | K | 74.0237  | 73.0284  | 147.1128 | 130.0863 |          | 1 |

| Seq     | ya       | yb       | Seq    | ya       | yb       | Seq    | ya       | yb       |
|---------|----------|----------|--------|----------|----------|--------|----------|----------|
| LQ      | 214.1550 | 242.1499 | LQA    | 285.1921 | 313.1870 | LQAL   | 398.2762 | 426.2711 |
| LQALQ   | 526.3348 | 554.3297 | LQALQY | 689.3981 | 717.3930 | QA     | 172.1081 | 200.1030 |
| QAL     | 285.1921 | 313.1870 | QALQ   | 413.2507 | 441.2456 | QALQY  | 576.3140 | 604.3089 |
| QALQYV  | 675.3824 | 703.3774 | AL     | 157.1335 | 185.1285 | ALQ    | 285.1921 | 313.1870 |
| ALQY    | 448.2554 | 476.2504 | ALQYV  | 547.3239 | 575.3188 | ALQYVQ | 675.3824 | 703.3774 |
| LQ      | 214.1550 | 242.1499 | LQY    | 377.2183 | 405.2132 | LQYV   | 476.2867 | 504.2817 |
| LQYVQ   | 604.3453 | 632.3402 | QY     | 264.1343 | 292.1292 | QYV    | 363.2027 | 391.1976 |
| QYVQ    | 491.2613 | 519.2562 | QYVQD  | 606.2882 | 634.2831 | YV     | 235.1441 | 263.1390 |
| YVQ     | 363.2027 | 391.1976 | YVQD   | 478.2296 | 506.2245 | YVQDN  | 592.2726 | 620.2675 |
| YVQDNP  | 689.3253 | 717.3202 | VQ     | 200.1394 | 228.1343 | VQD    | 315.1663 | 343.1612 |
| VQDN    | 429.2092 | 457.2041 | VQDNP  | 526.2620 | 554.2569 | VQDNPD | 641.2889 | 669.2838 |
| QD      | 216.0979 | 244.0928 | QDN    | 330.1408 | 358.1357 | QDNP   | 427.1936 | 455.1885 |
| QDNP    | 542.2205 | 570.2154 | QDNPDE | 671.2631 | 699.2580 | DN     | 202.0822 | 230.0771 |
| DNP     | 299.1350 | 327.1299 | DNPD   | 414.1619 | 442.1569 | DNPDE  | 543.2045 | 571.1994 |
| DNPDEV  | 642.2729 | 670.2679 | NP     | 184.1081 | 212.1030 | NPD    | 299.1350 | 327.1299 |
| NPDE    | 428.1776 | 456.1725 | NPDEV  | 527.2460 | 555.2409 | NPDEVC | 687.2767 | 715.2716 |
| PD      | 185.0921 | 213.0870 | PDE    | 314.1347 | 342.1296 | PDEV   | 413.2031 | 441.1980 |
| PDEV    | 573.2337 | 601.2286 | PDEVCP | 670.2865 | 698.2814 | DE     | 217.0819 | 245.0768 |
| DEV     | 316.1503 | 344.1452 | DEV    | 476.1810 | 504.1759 | DEVCP  | 573.2337 | 601.2286 |
| DEVCPA  | 644.2708 | 672.2658 | EV     | 201.1234 | 229.1183 | EVC    | 361.1540 | 389.1489 |
| EVC     | 458.2068 | 486.2017 | EVC    | 529.2439 | 557.2388 | EVC    | 586.2654 | 614.2603 |
| VC      | 232.1114 | 260.1063 | VCP    | 329.1642 | 357.1591 | VCPA   | 400.2013 | 428.1962 |
| VCPAG   | 457.2228 | 485.2177 | VCPAGW | 643.3021 | 671.2970 | CP     | 230.0958 | 258.0907 |
| CPA     | 301.1329 | 329.1278 | CPAG   | 358.1544 | 386.1493 | CPAGW  | 544.2337 | 572.2286 |
| CPAGWK  | 672.3286 | 700.3235 | PA     | 141.1022 | 169.0972 | PAG    | 198.1237 | 226.1186 |
| PAGW    | 384.2030 | 412.1979 | PAGWK  | 512.2980 | 540.2929 | PAGWK  | 609.3507 | 637.3457 |
| PAGWKPG | 666.3722 | 694.3671 | AG     | 101.0709 | 129.0659 | AGW    | 287.1503 | 315.1452 |
| AGWK    | 415.2452 | 443.2401 | AGWK   | 512.2980 | 540.2929 | AGWKPG | 569.3194 | 597.3144 |
| AGWKPGD | 684.3464 | 712.3413 | GW     | 216.1131 | 244.1081 | GWK    | 344.2081 | 372.2030 |
| GWK     | 441.2609 | 469.2558 | GWKPG  | 498.2823 | 526.2772 | GWKPGD | 613.3093 | 641.3042 |
| WK      | 287.1866 | 315.1816 | WKP    | 384.2394 | 412.2343 | WKPG   | 441.2609 | 469.2558 |
| WKPGD   | 556.2878 | 584.2827 | KP     | 198.1601 | 226.1550 | KPG    | 255.1816 | 283.1765 |
| KPGD    | 370.2085 | 398.2034 | PG     | 127.0866 | 155.0815 | PGD    | 242.1135 | 270.1084 |
| GD      | 145.0608 | 173.0557 |        |          |          |        |          |          |

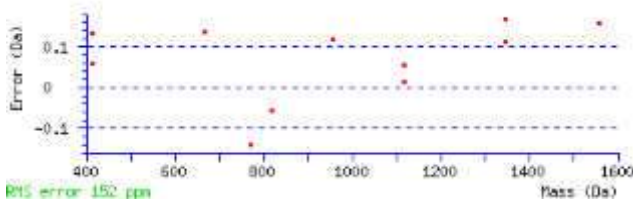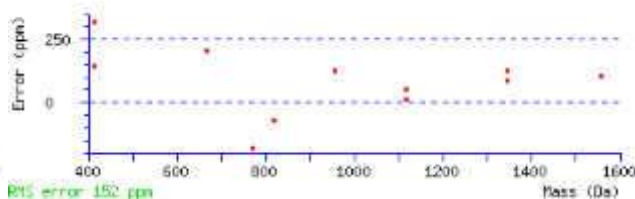

NCBI BLAST search of [TLOALQYVQDNPDEVCPAGWKPGDK](#)  
 (Parameters: blastp, nr protein database, expect=20000, no filter, PAM30)  
 Other BLAST [web gateways](#)

All matches to this query

| Score | Mr(calc)  | Delta   | Sequence                                     |
|-------|-----------|---------|----------------------------------------------|
| 5.5   | 2828.3439 | 0.1139  | <a href="#">TLQALQYVQDNPDEVCPAGWKPGDK</a>    |
| 4.4   | 2828.4598 | -0.0020 | <a href="#">LLVMOMAAQQOKLDQQQMDDLAK</a>      |
| 2.8   | 2828.4929 | -0.0351 | <a href="#">DGAVAYPSGHTTLMVVVLGMVILVAGAR</a> |
| 2.5   | 2828.4531 | 0.0047  | <a href="#">LSWNTVDVVTDAGGVPVMSKTGHAFIK</a>  |
| 0.9   | 2828.3551 | 0.1027  | <a href="#">GSPLNEIFPGESNLSQLMRAHDWSK</a>    |
| 0.3   | 2828.3837 | 0.0741  | <a href="#">ATOIEFLDGPTHIVPVMIGDAATCTR</a>   |
| 0.1   | 2828.3433 | 0.1145  | <a href="#">SOGLSQEPESGTLIQMOGOSKDMPPR</a>   |

Mascot: <http://www.matrixscience.com/>


**Mascot Search Results**
**Peptide View Spot no 20**
MS/MS Fragmentation of **FKESEVYHCR**Found in **gi115467828** in **NCBIInr**, Os06g0320500 [Oryza sativa Japonica Group]

Match to Query 255: 1353.666024 from(1354.673300,1+) intensity(0.0000) index(28)

Title: Label: H13, Spot\_Id: 219873, Peak\_List\_Id: 227935, MSMS Job\_Run\_Id: 21976, Comment:

Data file C:\Documents and Settings\Administrator\Desktop\Farah-Garima 11May 2013\ppw\_H13\_136868249100.txt

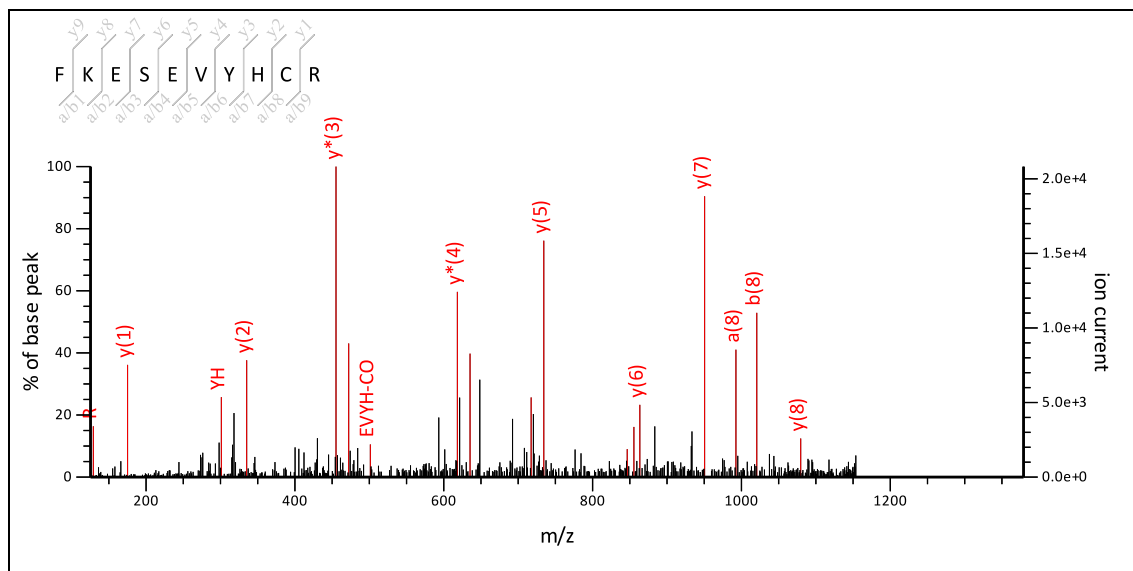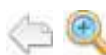

125.37 to 1379.05

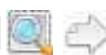Label all possible matches  Label matches used for scoring 

Monoisotopic mass of neutral peptide Mr(calc): 1353.6136

Fixed modifications: Carbamidomethyl (C) (apply to specified residues or termini only)

Ions Score: 70 Expect: 0.0034

Matches : 19/147 fragment ions using 22 most intense peaks ([help](#))

| #  | Immon.   | a         | a*        | a <sup>0</sup> | b         | b*        | b <sup>0</sup> | d         | Seq. | v         | w         | y         | y*        | y <sup>0</sup> | #  |
|----|----------|-----------|-----------|----------------|-----------|-----------|----------------|-----------|------|-----------|-----------|-----------|-----------|----------------|----|
| 1  | 120.0808 | 120.0808  |           |                | 148.0757  |           |                | 44.0495   | F    |           |           |           |           |                | 10 |
| 2  | 101.1073 | 248.1757  | 231.1492  |                | 276.1707  | 259.1441  |                | 191.1179  | K    | 1134.4633 | 1133.4680 | 1207.5524 | 1190.5259 | 1189.5419      | 9  |
| 3  | 102.0550 | 377.2183  | 360.1918  | 359.2078       | 405.2132  | 388.1867  | 387.2027       | 319.2129  | E    | 1005.4207 | 1004.4254 | 1079.4575 | 1062.4309 | 1061.4469      | 8  |
| 4  | 60.0444  | 464.2504  | 447.2238  | 446.2398       | 492.2453  | 475.2187  | 474.2347       | 448.2554  | S    | 918.3887  | 917.3934  | 950.4149  | 933.3883  | 932.4043       | 7  |
| 5  | 102.0550 | 593.2930  | 576.2664  | 575.2824       | 621.2879  | 604.2613  | 603.2773       | 535.2875  | E    | 789.3461  | 788.3508  | 863.3828  | 846.3563  | 845.3723       | 6  |
| 6  | 72.0808  | 692.3614  | 675.3348  | 674.3508       | 720.3563  | 703.3297  | 702.3457       | 678.3457  | V    | 690.2777  | 703.2981  | 734.3403  | 717.3137  |                | 5  |
| 7  | 136.0757 | 855.4247  | 838.3981  | 837.4141       | 883.4196  | 866.3931  | 865.4090       |           | Y    | 527.2143  |           | 635.2718  | 618.2453  |                | 4  |
| 8  | 110.0713 | 992.4836  | 975.4571  | 974.4730       | 1020.4785 | 1003.4520 | 1002.4680      |           | H    | 390.1554  |           | 472.2085  | 455.1820  |                | 3  |
| 9  | 133.0430 | 1152.5143 | 1135.4877 | 1134.5037      | 1180.5092 | 1163.4826 | 1162.4986      | 1063.5207 | C    | 230.1248  | 229.1295  | 335.1496  | 318.1231  |                | 2  |
| 10 | 129.1135 |           |           |                |           |           |                |           | R    | 74.0237   | 73.0284   | 175.1190  | 158.0924  |                | 1  |

| Seq   | ya       | yb       | Seq   | ya       | yb       | Seq   | ya       | yb       |
|-------|----------|----------|-------|----------|----------|-------|----------|----------|
| KE    | 230.1499 | 258.1448 | KES   | 317.1819 | 345.1769 | KESE  | 446.2245 | 474.2195 |
| KESEV | 545.2930 | 573.2879 | ES    | 189.0870 | 217.0819 | ESE   | 318.1296 | 346.1245 |
| ESEV  | 417.1980 | 445.1929 | ESEVY | 580.2613 | 608.2562 | SE    | 189.0870 | 217.0819 |
| SEV   | 288.1554 | 316.1503 | SEVY  | 451.2187 | 479.2136 | SEVYH | 588.2776 | 616.2726 |
| EV    | 201.1234 | 229.1183 | EVY   | 364.1867 | 392.1816 | EVYH  | 501.2456 | 529.2405 |
| EVYHC | 661.2763 | 689.2712 | VY    | 235.1441 | 263.1390 | VYH   | 372.2030 | 400.1979 |
| VYHC  | 532.2337 | 560.2286 | YH    | 273.1346 | 301.1295 | YHC   | 433.1653 | 461.1602 |

|    |          |          |  |  |  |  |  |  |
|----|----------|----------|--|--|--|--|--|--|
| HC | 270.1019 | 298.0968 |  |  |  |  |  |  |
|----|----------|----------|--|--|--|--|--|--|

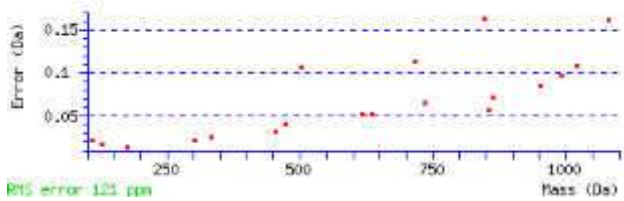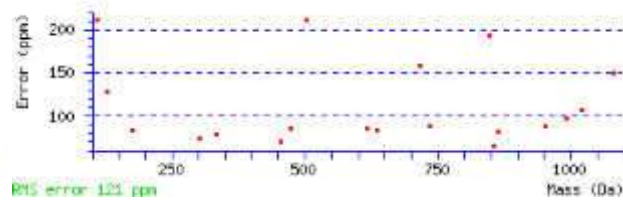

NCBI BLAST search of [FKESEVYHCR](#)

(Parameters: blastp, nr protein database, expect=20000, no filter, PAM30)

Other BLAST [web gateways](#)

#### All matches to this query

| Score | Mr(calc)  | Delta   | Sequence                      |
|-------|-----------|---------|-------------------------------|
| 69.9  | 1353.6136 | 0.0525  | <a href="#">FKESEVYHCR</a>    |
| 32.8  | 1353.6048 | 0.0612  | <a href="#">QISEAFQSSDDK</a>  |
| 27.5  | 1353.7306 | -0.0646 | <a href="#">HPKHYYTAVFR</a>   |
| 25.9  | 1353.6161 | 0.0499  | <a href="#">TDTSAPGSQFSTR</a> |
| 25.4  | 1353.6564 | 0.0096  | <a href="#">KHFSYLSSEEK</a>   |
| 24.3  | 1353.5401 | 0.1259  | <a href="#">RMEMGDANGSDR</a>  |
| 23.7  | 1353.7656 | -0.0996 | <a href="#">YISKEYVYALLR</a>  |
| 23.6  | 1353.6976 | -0.0315 | <a href="#">IKYIHLDHCR</a>    |
| 23.4  | 1353.6048 | 0.0612  | <a href="#">AYKEELSEDDR</a>   |
| 23.3  | 1353.6381 | 0.0279  | <a href="#">STSMVVVGGGTMR</a> |

Mascot: <http://www.matrixscience.com/>

**MATRIX SCIENCE Mascot Search Results**

**Peptide View Spot no 21**

MS/MS Fragmentation of **SFGVLIPDQGIALR**

Found in **gi|115446541** in **NCBI nr**, Os02g0537700 [Oryza sativa Japonica Group]

Match to Query 13: 1484.907024 from(1485.914300,1+) intensity(0.0000) index(4)

Title: Label: J7, Spot\_Id: 219779, Peak\_List\_Id: 226419, MSMS Job\_Run\_Id: 21843, Comment:

Data file C:\Documents and Settings\Administrator\Desktop\Farah-Garima 11May 2013\ppw\_J7\_136859916700.txt

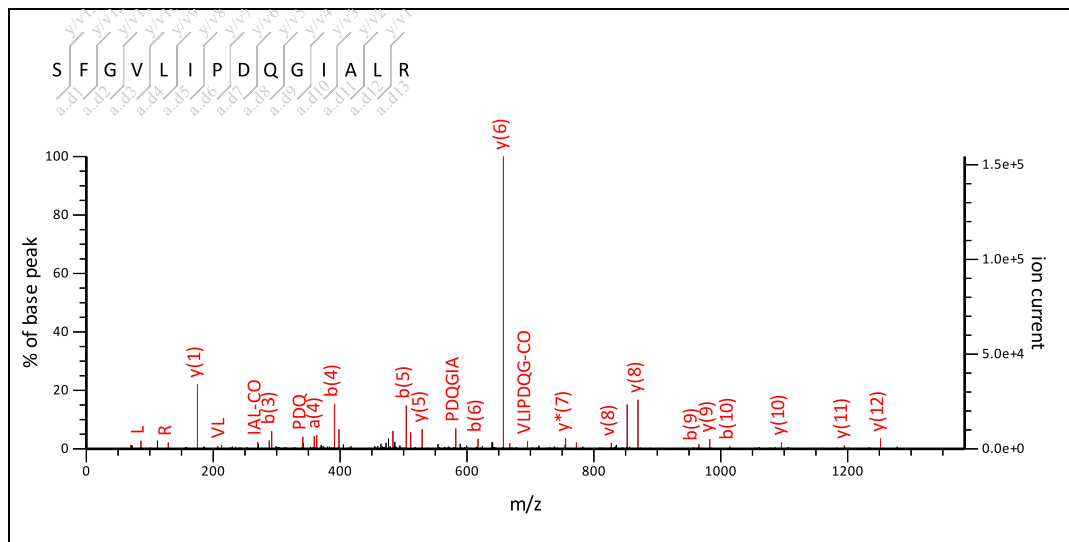

Navigation icons: Home, Back, Forward, Search, Print, Refresh. Search range: 0 to 1384.47.

Label all possible matches  Label matches used for scoring

Monoisotopic mass of neutral peptide Mr(calc): 1484.8351

Fixed modifications: Carbamidomethyl (C) (apply to specified residues or termini only)

Ions Score: 94 Expect: 6.6e-06

Matches : 57/238 fragment ions using 52 most intense peaks [\(help\)](#)

| #  | Immon.   | a         | a*        | a <sup>0</sup> | b         | b*        | b <sup>0</sup> | d         | d'        | Seq. | v         | w         | w'       | y         | y*        |
|----|----------|-----------|-----------|----------------|-----------|-----------|----------------|-----------|-----------|------|-----------|-----------|----------|-----------|-----------|
| 1  | 60.0444  | 60.0444   |           | 42.0338        | 88.0393   |           | 70.0287        | 44.0495   |           | S    |           |           |          |           |           |
| 2  | 120.0808 | 207.1128  |           | 189.1022       | 235.1077  |           | 217.0972       |           |           | F    | 1306.7478 |           |          | 1398.8104 | 1381.7838 |
| 3  | 30.0338  | 264.1343  |           | 246.1237       | 292.1292  |           | 274.1186       |           |           | G    |           |           |          | 1251.7419 | 1234.7154 |
| 4  | 72.0808  | 363.2027  |           | 345.1921       | 391.1976  |           | 373.1870       | 349.1870  |           | V    | 1150.6579 | 1163.6783 |          | 1194.7205 | 1177.6939 |
| 5  | 86.0964  | 476.2867  |           | 458.2762       | 504.2817  |           | 486.2711       | 434.2398  |           | L    | 1037.5738 | 1036.5786 |          | 1095.6521 | 1078.6255 |
| 6  | 86.0964  | 589.3708  |           | 571.3602       | 617.3657  |           | 599.3552       | 561.3395  | 575.3552  | I    | 924.4898  | 937.5102  | 951.5258 | 982.5680  | 965.5415  |
| 7  | 70.0651  | 686.4236  |           | 668.4130       | 714.4185  |           | 696.4079       | 660.4079  |           | P    | 827.4370  | 826.4417  |          | 869.4839  | 852.4574  |
| 8  | 88.0393  | 801.4505  |           | 783.4400       | 829.4454  |           | 811.4349       | 757.4607  |           | D    | 712.4100  | 711.4148  |          | 772.4312  | 755.4046  |
| 9  | 101.0709 | 929.5091  | 912.4825  | 911.4985       | 957.5040  | 940.4775  | 939.4934       | 872.4876  |           | Q    | 584.3515  | 583.3562  |          | 657.4042  | 640.3777  |
| 10 | 30.0338  | 986.5306  | 969.5040  | 968.5200       | 1014.5255 | 997.4989  | 996.5149       |           |           | G    |           |           |          | 529.3457  | 512.3191  |
| 11 | 86.0964  | 1099.6146 | 1082.5881 | 1081.6041      | 1127.6095 | 1110.5830 | 1109.5990      | 1071.5833 | 1085.5990 | I    | 414.2459  | 427.2663  | 441.2820 | 472.3242  | 455.2976  |
| 12 | 44.0495  | 1170.6517 | 1153.6252 | 1152.6412      | 1198.6467 | 1181.6201 | 1180.6361      |           |           | A    | 343.2088  |           |          | 359.2401  | 342.2136  |
| 13 | 86.0964  | 1283.7358 | 1266.7093 | 1265.7252      | 1311.7307 | 1294.7042 | 1293.7201      | 1241.6889 |           | L    | 230.1248  | 229.1295  |          | 288.2030  | 271.1765  |
| 14 | 129.1135 |           |           |                |           |           |                |           |           | R    | 74.0237   | 73.0284   |          | 175.1190  | 158.0924  |

| Seq    | ya       | yb       | Seq     | ya       | yb       | Seq   | ya       | yb       |
|--------|----------|----------|---------|----------|----------|-------|----------|----------|
| FG     | 177.1022 | 205.0972 | FGV     | 276.1707 | 304.1656 | FGVL  | 389.2547 | 417.2496 |
| FGVLI  | 502.3388 | 530.3337 | FGVLIP  | 599.3915 | 627.3865 | GV    | 129.1022 | 157.0972 |
| GVL    | 242.1863 | 270.1812 | GVLI    | 355.2704 | 383.2653 | GVLIP | 452.3231 | 480.3180 |
| GVLIPD | 567.3501 | 595.3450 | GVLIPDQ | 695.4087 | 723.4036 | VL    | 185.1648 | 213.1598 |
| VLI    | 298.2489 | 326.2438 | VLIP    | 395.3017 | 423.2966 | VLIPD | 510.3286 | 538.3235 |
| VLIPDQ | 638.3872 | 666.3821 | VLIPDQG | 695.4087 | 723.4036 | LI    | 199.1805 | 227.1754 |
| LIP    | 296.2333 | 324.2282 | LIPD    | 411.2602 | 439.2551 | LIPDQ | 539.3188 | 567.3137 |



|         |          |          |       |          |          |        |          |          |
|---------|----------|----------|-------|----------|----------|--------|----------|----------|
| LIPDQG  | 596.3402 | 624.3352 | IP    | 183.1492 | 211.1441 | IPD    | 298.1761 | 326.1710 |
| IPDQ    | 426.2347 | 454.2296 | IPDQG | 483.2562 | 511.2511 | IPDQGI | 596.3402 | 624.3352 |
| IPDQGIA | 667.3774 | 695.3723 | PD    | 185.0921 | 213.0870 | PDQ    | 313.1506 | 341.1456 |
| PDQG    | 370.1721 | 398.1670 | PDQGI | 483.2562 | 511.2511 | PDQGIA | 554.2933 | 582.2882 |
| PDQGIAL | 667.3774 | 695.3723 | DQ    | 216.0979 | 244.0928 | DQG    | 273.1193 | 301.1143 |
| DQGI    | 386.2034 | 414.1983 | DQGIA | 457.2405 | 485.2354 | DQGIAL | 570.3246 | 598.3195 |
| QG      | 158.0924 | 186.0873 | QGI   | 271.1765 | 299.1714 | QGIA   | 342.2136 | 370.2085 |
| QGIAL   | 455.2976 | 483.2926 | GI    | 143.1179 | 171.1128 | GIA    | 214.1550 | 242.1499 |
| GIAL    | 327.2391 | 355.2340 | IA    | 157.1335 | 185.1285 | IAL    | 270.2176 | 298.2125 |
| AL      | 157.1335 | 185.1285 |       |          |          |        |          |          |

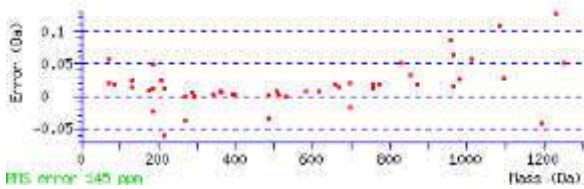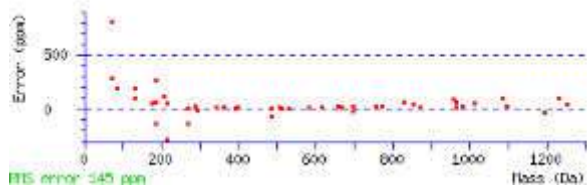

NCBI BLAST search of [SFGVLIPDQGIALR](#)

(Parameters: blastp, nr protein database, expect=20000, no filter, PAM30)

Other BLAST [web gateways](#)

#### All matches to this query

| Score | Mr(calc)  | Delta  | Sequence                       |
|-------|-----------|--------|--------------------------------|
| 94.1  | 1484.8351 | 0.0719 | <a href="#">SFGVLIPDQGIALR</a> |
| 33.7  | 1484.8562 | 0.0508 | <a href="#">LVQIITSNILDTR</a>  |
| 30.3  | 1484.8674 | 0.0396 | <a href="#">SSLALAVARLIESR</a> |
| 29.7  | 1484.7697 | 0.1373 | <a href="#">MSRLFAFLIDEK</a>   |
| 29.7  | 1484.8198 | 0.0872 | <a href="#">ALTSLLVGLNAEER</a> |
| 29.2  | 1484.8311 | 0.0759 | <a href="#">IVSTTDPSIGARIR</a> |
| 29.2  | 1484.8311 | 0.0760 | <a href="#">LSEARAGIVIAETR</a> |
| 28.6  | 1484.8450 | 0.0620 | <a href="#">VLVVKQDDLSEIK</a>  |
| 28.6  | 1484.7947 | 0.1123 | <a href="#">RELVGKPIDITSR</a>  |
| 28.2  | 1484.8311 | 0.0760 | <a href="#">RETVAOALLSER</a>   |

Mascot: <http://www.matrixscience.com/>

**MATRIX SCIENCE Mascot Search Results**

**Peptide View Spot no 21**

MS/MS Fragmentation of **EGVIQHSTINNLAIGR**

Found in **gi|115446541** in **NCBI nr**, Os02g0537700 [Oryza sativa Japonica Group]

Match to Query 21: 1721.009124 from(1722.016400,1+) intensity(0.0000) index(7)

Title: Label: J7, Spot\_Id: 219779, Peak\_List\_Id: 226428, MSMS Job\_Run\_Id: 21843, Comment:

Data file C:\Documents and Settings\Administrator\Desktop\Farah-Garima 11May 2013\ppw\_J7\_136859916700.txt

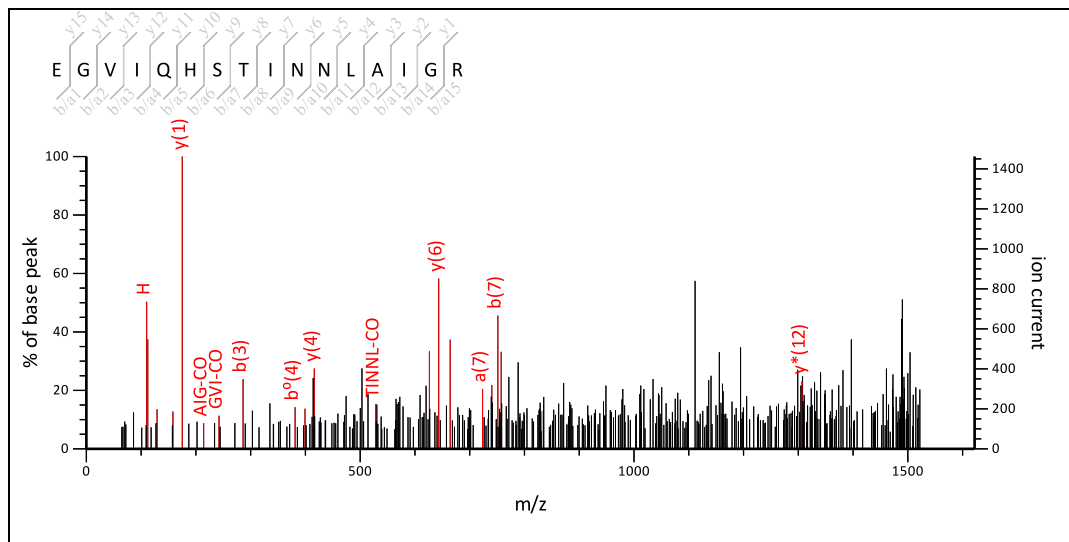

Navigation icons: Home, Back, Forward, Search, and a search range input field showing '0 to 1621.94'.

Label all possible matches  Label matches used for scoring

Monoisotopic mass of neutral peptide Mr(calc): 1720.9220

Fixed modifications: Carbamidomethyl (C) (apply to specified residues or termini only)

Ions Score: 10 Expect: 1.9e+03

Matches : 28/292 fragment ions using 60 most intense peaks (help)

| #  | Immon.   | a         | a*        | a <sup>0</sup> | b         | b*        | b <sup>0</sup> | d         | d'        | Seq. | v         | w         | w'        | y         | y*        |
|----|----------|-----------|-----------|----------------|-----------|-----------|----------------|-----------|-----------|------|-----------|-----------|-----------|-----------|-----------|
| 1  | 102.0550 | 102.0550  |           | 84.0444        | 130.0499  |           | 112.0393       | 44.0495   |           | E    |           |           |           |           |           |
| 2  | 30.0338  | 159.0764  |           | 141.0659       | 187.0713  |           | 169.0608       |           |           | G    |           |           |           | 1592.8867 | 1575.8602 |
| 3  | 72.0808  | 258.1448  |           | 240.1343       | 286.1397  |           | 268.1292       | 244.1292  |           | V    | 1491.8027 | 1504.8231 |           | 1535.8653 | 1518.8387 |
| 4  | 86.0964  | 371.2289  |           | 353.2183       | 399.2238  |           | 381.2132       | 343.1976  | 357.2132  | I    | 1378.7186 | 1391.7390 | 1405.7546 | 1436.7968 | 1419.7703 |
| 5  | 101.0709 | 499.2875  | 482.2609  | 481.2769       | 527.2824  | 510.2558  | 509.2718       | 442.2660  |           | Q    | 1250.6600 | 1249.6648 |           | 1323.7128 | 1306.6862 |
| 6  | 110.0713 | 636.3464  | 619.3198  | 618.3358       | 664.3413  | 647.3148  | 646.3307       |           |           | H    | 1113.6011 |           |           | 1195.6542 | 1178.6276 |
| 7  | 60.0444  | 723.3784  | 706.3519  | 705.3678       | 751.3733  | 734.3468  | 733.3628       | 707.3835  |           | S    | 1026.5691 | 1025.5738 |           | 1058.5953 | 1041.5687 |
| 8  | 74.0600  | 824.4261  | 807.3995  | 806.4155       | 852.4210  | 835.3945  | 834.4104       | 808.4312  | 810.4104  | T    | 925.5214  | 938.5418  | 940.5211  | 971.5633  | 954.5367  |
| 9  | 86.0964  | 937.5102  | 920.4836  | 919.4996       | 965.5051  | 948.4785  | 947.4945       | 909.4789  | 923.4945  | I    | 812.4373  | 825.4577  | 839.4734  | 870.5156  | 853.4890  |
| 10 | 87.0553  | 1051.5531 | 1034.5265 | 1033.5425      | 1079.5480 | 1062.5215 | 1061.5374      | 1008.5473 |           | N    | 698.3944  | 697.3991  |           | 757.4315  | 740.4050  |
| 11 | 87.0553  | 1165.5960 | 1148.5695 | 1147.5854      | 1193.5909 | 1176.5644 | 1175.5804      | 1122.5902 |           | N    | 584.3515  | 583.3562  |           | 643.3886  | 626.3620  |
| 12 | 86.0964  | 1278.6801 | 1261.6535 | 1260.6695      | 1306.6750 | 1289.6484 | 1288.6644      | 1236.6331 |           | L    | 471.2674  | 470.2722  |           | 529.3457  | 512.3191  |
| 13 | 44.0495  | 1349.7172 | 1332.6906 | 1331.7066      | 1377.7121 | 1360.6856 | 1359.7015      |           |           | A    | 400.2303  |           |           | 416.2616  | 399.2350  |
| 14 | 86.0964  | 1462.8013 | 1445.7747 | 1444.7907      | 1490.7962 | 1473.7696 | 1472.7856      | 1434.7700 | 1448.7856 | I    | 287.1462  | 300.1666  | 314.1823  | 345.2245  | 328.1979  |
| 15 | 30.0338  | 1519.8227 | 1502.7962 | 1501.8122      | 1547.8176 | 1530.7911 | 1529.8071      |           |           | G    |           |           |           | 232.1404  | 215.1139  |
| 16 | 129.1135 |           |           |                |           |           |                |           |           | R    | 74.0237   | 73.0284   |           | 175.1190  | 158.0924  |

| Seq   | ya       | yb       | Seq    | ya       | yb       | Seq     | ya       | yb       |
|-------|----------|----------|--------|----------|----------|---------|----------|----------|
| GV    | 129.1022 | 157.0972 | GVI    | 242.1863 | 270.1812 | GVIQ    | 370.2449 | 398.2398 |
| GVIQH | 507.3038 | 535.2987 | GVIQHS | 594.3358 | 622.3307 | GVIQHST | 695.3835 | 723.3784 |
| VI    | 185.1648 | 213.1598 | VIQ    | 313.2234 | 341.2183 | VIQH    | 450.2823 | 478.2772 |
| VIQHS | 537.3144 | 565.3093 | VIQHST | 638.3620 | 666.3570 | IQ      | 214.1550 | 242.1499 |
| IQH   | 351.2139 | 379.2088 | IQHS   | 438.2459 | 466.2409 | IQHST   | 539.2936 | 567.2885 |

|                |          |          |                |          |          |                |          |          |
|----------------|----------|----------|----------------|----------|----------|----------------|----------|----------|
| <b>IQHSTI</b>  | 652.3777 | 680.3726 | <b>QH</b>      | 238.1299 | 266.1248 | <b>QHS</b>     | 325.1619 | 353.1568 |
| <b>QHST</b>    | 426.2096 | 454.2045 | <b>QHSTI</b>   | 539.2936 | 567.2885 | <b>QHSTIN</b>  | 653.3365 | 681.3315 |
| <b>HS</b>      | 197.1033 | 225.0982 | <b>HST</b>     | 298.1510 | 326.1459 | <b>HSTI</b>    | 411.2350 | 439.2300 |
| <b>HSTIN</b>   | 525.2780 | 553.2729 | <b>HSTINN</b>  | 639.3209 | 667.3158 | <b>ST</b>      | 161.0921 | 189.0870 |
| <b>STI</b>     | 274.1761 | 302.1710 | <b>STIN</b>    | 388.2191 | 416.2140 | <b>STINN</b>   | 502.2620 | 530.2569 |
| <b>STINNL</b>  | 615.3460 | 643.3410 | <b>STINNLA</b> | 686.3832 | 714.3781 | <b>TI</b>      | 187.1441 | 215.1390 |
| <b>TIN</b>     | 301.1870 | 329.1819 | <b>TINN</b>    | 415.2300 | 443.2249 | <b>TINNL</b>   | 528.3140 | 556.3089 |
| <b>TINNLA</b>  | 599.3511 | 627.3461 | <b>IN</b>      | 200.1394 | 228.1343 | <b>INN</b>     | 314.1823 | 342.1772 |
| <b>INNLA</b>   | 427.2663 | 455.2613 | <b>INNLA</b>   | 498.3035 | 526.2984 | <b>INNLAIG</b> | 611.3875 | 639.3824 |
| <b>INNLAIG</b> | 668.4090 | 696.4039 | <b>NN</b>      | 201.0982 | 229.0931 | <b>NNL</b>     | 314.1823 | 342.1772 |
| <b>NNLA</b>    | 385.2194 | 413.2143 | <b>NNLAI</b>   | 498.3035 | 526.2984 | <b>NNLAIG</b>  | 555.3249 | 583.3198 |
| <b>NL</b>      | 200.1394 | 228.1343 | <b>NLA</b>     | 271.1765 | 299.1714 | <b>NLAI</b>    | 384.2605 | 412.2554 |
| <b>NLAIG</b>   | 441.2820 | 469.2769 | <b>LA</b>      | 157.1335 | 185.1285 | <b>LAI</b>     | 270.2176 | 298.2125 |
| <b>LAIG</b>    | 327.2391 | 355.2340 | <b>AI</b>      | 157.1335 | 185.1285 | <b>AIG</b>     | 214.1550 | 242.1499 |
| <b>IG</b>      | 143.1179 | 171.1128 |                |          |          |                |          |          |

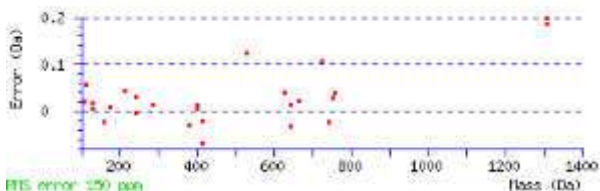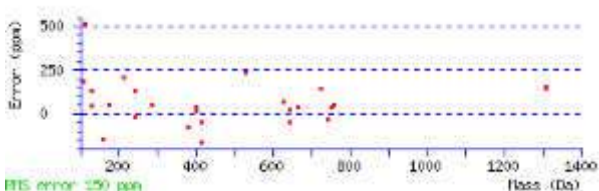

NCBI BLAST search of [EGVIOHSTINNLAIGR](#)

(Parameters: blastp, nr protein database, expect=20000, no filter, PAM30)

Other BLAST [web gateways](#)

#### All matches to this query

| Score | M <sub>r</sub> (calc) | Delta  | Sequence                           |
|-------|-----------------------|--------|------------------------------------|
| 13.9  | 1720.9472             | 0.0619 | <a href="#">OLVTNSVNTVYSIKR</a>    |
| 13.0  | 1720.8744             | 0.1348 | <a href="#">NAETIGNYLLDNLKR</a>    |
| 12.9  | 1720.9162             | 0.0930 | <a href="#">FPWPSGPPRGLNLAGR</a>   |
| 12.8  | 1720.9359             | 0.0732 | <a href="#">RLEELATGTFVAVSK</a>    |
| 12.0  | 1720.8937             | 0.1155 | <a href="#">NYHIFYQLLAGAPSK</a>    |
| 11.3  | 1720.9332             | 0.0759 | <a href="#">RGEPAAALQGQVYALGAR</a> |
| 11.1  | 1720.9334             | 0.0757 | <a href="#">SLLTPCYEGGPILKR</a>    |
| 10.3  | 1720.9049             | 0.1042 | <a href="#">NYHIFYQLLAGLNR</a>     |
| 10.3  | 1720.9220             | 0.0871 | <a href="#">EGVIOHSTINNLAIGR</a>   |
| 10.1  | 1720.9108             | 0.0983 | <a href="#">VDSLISHSADALPIQR</a>   |

Mascot: <http://www.matrixscience.com/>

**MATRIX SCIENCE Mascot Search Results**

**Peptide View Spot no 21**

MS/MS Fragmentation of **SGGLGDLKYPLISDVTK**

Found in **gi|115446541** in **NCBI nr**, Os02g0537700 [Oryza sativa Japonica Group]

Match to Query 24: 1762.019224 from(1763.026500,1+) intensity(0.0000) index(8)

Title: Label: J7, Spot\_Id: 219779, Peak\_List\_Id: 226422, MSMS Job\_Run\_Id: 21843, Comment:

Data file C:\Documents and Settings\Administrator\Desktop\Farah-Garima 11May 2013\ppw\_J7\_136859916700.txt

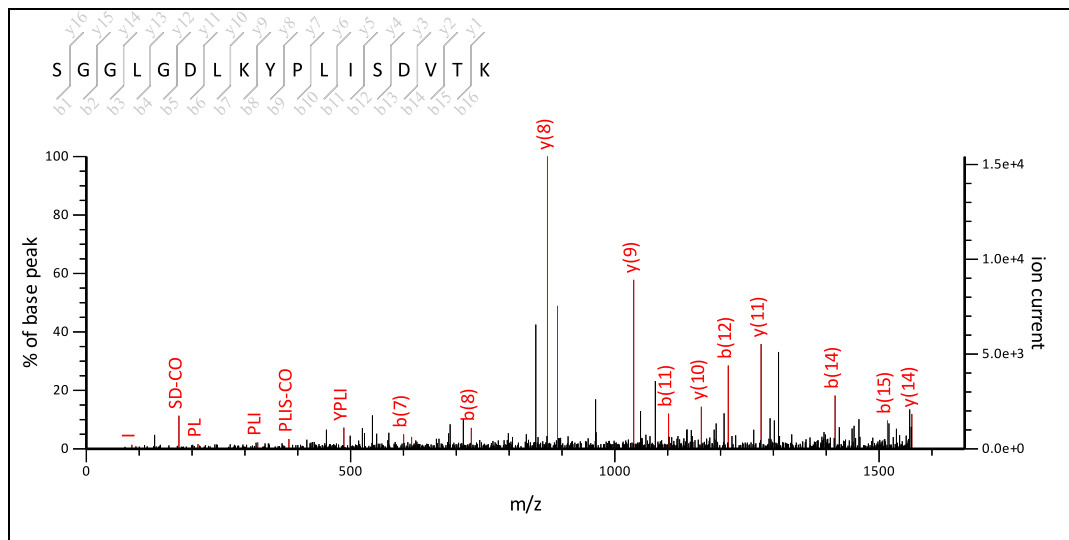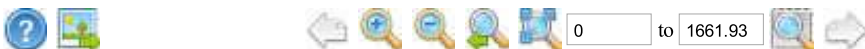

Label all possible matches  Label matches used for scoring

Monoisotopic mass of neutral peptide Mr(calc): 1761.9513

Fixed modifications: Carbamidomethyl (C) (apply to specified residues or termini only)

Ions Score: 33 Expect: 10

Matches : 24/305 fragment ions using 45 most intense peaks (help)

| #  | Immon.   | a         | a*        | a <sup>0</sup> | b         | b*        | b <sup>0</sup> | d         | d'        | Seq. | v         | w         | w'       | y         | y*        |
|----|----------|-----------|-----------|----------------|-----------|-----------|----------------|-----------|-----------|------|-----------|-----------|----------|-----------|-----------|
| 1  | 60.0444  | 60.0444   |           | 42.0338        | 88.0393   |           | 70.0287        | 44.0495   |           | S    |           |           |          |           |           |
| 2  | 30.0338  | 117.0659  |           | 99.0553        | 145.0608  |           | 127.0502       |           |           | G    |           |           |          | 1675.9265 | 1658.9000 |
| 3  | 30.0338  | 174.0873  |           | 156.0768       | 202.0822  |           | 184.0717       |           |           | G    |           |           |          | 1618.9051 | 1601.8785 |
| 4  | 86.0964  | 287.1714  |           | 269.1608       | 315.1663  |           | 297.1557       | 245.1244  |           | L    | 1503.8053 | 1502.8101 |          | 1561.8836 | 1544.8570 |
| 5  | 30.0338  | 344.1928  |           | 326.1823       | 372.1878  |           | 354.1772       |           |           | G    |           |           |          | 1448.7995 | 1431.7730 |
| 6  | 88.0393  | 459.2198  |           | 441.2092       | 487.2147  |           | 469.2041       | 415.2300  |           | D    | 1331.7569 | 1330.7617 |          | 1391.7781 | 1374.7515 |
| 7  | 86.0964  | 572.3039  |           | 554.2933       | 600.2988  |           | 582.2882       | 530.2569  |           | L    | 1218.6729 | 1217.6776 |          | 1276.7511 | 1259.7246 |
| 8  | 101.1073 | 700.3988  | 683.3723  | 682.3882       | 728.3937  | 711.3672  | 710.3832       | 643.3410  |           | K    | 1090.5779 | 1089.5827 |          | 1163.6671 | 1146.6405 |
| 9  | 136.0757 | 863.4621  | 846.4356  | 845.4516       | 891.4571  | 874.4305  | 873.4465       |           |           | Y    | 927.5146  |           |          | 1035.5721 | 1018.5455 |
| 10 | 70.0651  | 960.5149  | 943.4884  | 942.5043       | 988.5098  | 971.4833  | 970.4993       | 934.4993  |           | P    | 830.4618  | 829.4666  |          | 872.5088  | 855.4822  |
| 11 | 86.0964  | 1073.5990 | 1056.5724 | 1055.5884      | 1101.5939 | 1084.5673 | 1083.5833      | 1031.5520 |           | L    | 717.3777  | 716.3825  |          | 775.4560  | 758.4294  |
| 12 | 86.0964  | 1186.6830 | 1169.6565 | 1168.6725      | 1214.6780 | 1197.6514 | 1196.6674      | 1158.6517 | 1172.6674 | I    | 604.2937  | 617.3141  | 631.3297 | 662.3719  | 645.3454  |
| 13 | 60.0444  | 1273.7151 | 1256.6885 | 1255.7045      | 1301.7100 | 1284.6834 | 1283.6994      | 1257.7201 |           | S    | 517.2617  | 516.2664  |          | 549.2879  | 532.2613  |
| 14 | 88.0393  | 1388.7420 | 1371.7155 | 1370.7314      | 1416.7369 | 1399.7104 | 1398.7264      | 1344.7522 |           | D    | 402.2347  | 401.2395  |          | 462.2558  | 445.2293  |
| 15 | 72.0808  | 1487.8104 | 1470.7839 | 1469.7999      | 1515.8053 | 1498.7788 | 1497.7948      | 1473.7948 |           | V    | 303.1663  | 316.1867  |          | 347.2289  | 330.2023  |
| 16 | 74.0600  | 1588.8581 | 1571.8316 | 1570.8475      | 1616.8530 | 1599.8265 | 1598.8425      | 1572.8632 | 1574.8425 | T    | 202.1186  | 215.1390  | 217.1183 | 248.1605  | 231.1339  |
| 17 | 101.1073 |           |           |                |           |           |                |           |           | K    | 74.0237   | 73.0284   |          | 147.1128  | 130.0863  |

| Seq   | ya       | yb       | Seq    | ya       | yb       | Seq     | ya       | yb       |
|-------|----------|----------|--------|----------|----------|---------|----------|----------|
| GG    | 87.0553  | 115.0502 | GGL    | 200.1394 | 228.1343 | GGLG    | 257.1608 | 285.1557 |
| GGLGD | 372.1878 | 400.1827 | GGLGDL | 485.2718 | 513.2667 | GGLGDLK | 613.3668 | 641.3617 |
| GL    | 143.1179 | 171.1128 | GLG    | 200.1394 | 228.1343 | GLGD    | 315.1663 | 343.1612 |
| GLGDL | 428.2504 | 456.2453 | GLGDLK | 556.3453 | 584.3402 | LG      | 143.1179 | 171.1128 |

|               |          |          |               |          |          |                |          |          |
|---------------|----------|----------|---------------|----------|----------|----------------|----------|----------|
| <b>LGD</b>    | 258.1448 | 286.1397 | <b>LGDL</b>   | 371.2289 | 399.2238 | <b>LGDLK</b>   | 499.3239 | 527.3188 |
| <b>LGDLKY</b> | 662.3872 | 690.3821 | <b>GD</b>     | 145.0608 | 173.0557 | <b>GDL</b>     | 258.1448 | 286.1397 |
| <b>GDLK</b>   | 386.2398 | 414.2347 | <b>GDLKY</b>  | 549.3031 | 577.2980 | <b>GDLKYP</b>  | 646.3559 | 674.3508 |
| <b>DL</b>     | 201.1234 | 229.1183 | <b>DLK</b>    | 329.2183 | 357.2132 | <b>DLKY</b>    | 492.2817 | 520.2766 |
| <b>DLKYP</b>  | 589.3344 | 617.3293 | <b>LK</b>     | 214.1914 | 242.1863 | <b>LKY</b>     | 377.2547 | 405.2496 |
| <b>LKYP</b>   | 474.3075 | 502.3024 | <b>LKYPL</b>  | 587.3915 | 615.3865 | <b>KY</b>      | 264.1707 | 292.1656 |
| <b>KYP</b>    | 361.2234 | 389.2183 | <b>KYPL</b>   | 474.3075 | 502.3024 | <b>KYPLI</b>   | 587.3915 | 615.3865 |
| <b>KYPLIS</b> | 674.4236 | 702.4185 | <b>YP</b>     | 233.1285 | 261.1234 | <b>YPL</b>     | 346.2125 | 374.2074 |
| <b>YPLI</b>   | 459.2966 | 487.2915 | <b>YPLIS</b>  | 546.3286 | 574.3235 | <b>YPLISD</b>  | 661.3556 | 689.3505 |
| <b>PL</b>     | 183.1492 | 211.1441 | <b>PLI</b>    | 296.2333 | 324.2282 | <b>PLIS</b>    | 383.2653 | 411.2602 |
| <b>PLISD</b>  | 498.2922 | 526.2871 | <b>PLISDV</b> | 597.3606 | 625.3556 | <b>PLISDVT</b> | 698.4083 | 726.4032 |
| <b>LI</b>     | 199.1805 | 227.1754 | <b>LIS</b>    | 286.2125 | 314.2074 | <b>LISD</b>    | 401.2395 | 429.2344 |
| <b>LISDV</b>  | 500.3079 | 528.3028 | <b>LISDVT</b> | 601.3556 | 629.3505 | <b>IS</b>      | 173.1285 | 201.1234 |
| <b>ISD</b>    | 288.1554 | 316.1503 | <b>ISDV</b>   | 387.2238 | 415.2187 | <b>ISDVT</b>   | 488.2715 | 516.2664 |
| <b>SD</b>     | 175.0713 | 203.0662 | <b>SDV</b>    | 274.1397 | 302.1347 | <b>SDVT</b>    | 375.1874 | 403.1823 |
| <b>DV</b>     | 187.1077 | 215.1026 | <b>DVT</b>    | 288.1554 | 316.1503 | <b>VT</b>      | 173.1285 | 201.1234 |

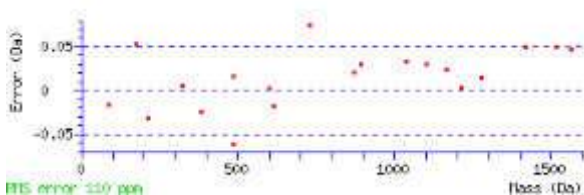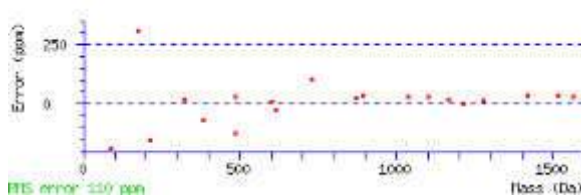

NCBI **BLAST** search of [SGGLGDLKYPLISDVTK](#)

(Parameters: blastp, nr protein database, expect=20000, no filter, PAM30)

Other BLAST [web gateways](#)

#### All matches to this query

| Score | Mr(calc)  | Delta   | Sequence                          |
|-------|-----------|---------|-----------------------------------|
| 33.2  | 1761.9513 | 0.0680  | <a href="#">SGGLGDLKYPLISDVTK</a> |
| 24.9  | 1762.0213 | -0.0021 | <a href="#">TTROISLLPAASHLVR</a>  |
| 23.9  | 1762.0352 | -0.0160 | <a href="#">IPEAADPLRLSLOVLK</a>  |
| 22.0  | 1761.8719 | 0.1473  | <a href="#">MQSLPEYNSLLTPNR</a>   |
| 21.4  | 1761.9598 | 0.0594  | <a href="#">ALEVGSRNHALAGSKPR</a> |
| 21.3  | 1761.9447 | 0.0745  | <a href="#">SSLNLLMGFIAPSSGR</a>  |
| 21.2  | 1761.9737 | 0.0455  | <a href="#">KPDISTSPHLSPSRK</a>   |
| 20.9  | 1761.9261 | 0.0931  | <a href="#">QVAATVETLYSLSPQR</a>  |
| 20.4  | 1761.9665 | 0.0527  | <a href="#">QFLNPLESFSLGVLAK</a>  |
| 19.1  | 1761.9513 | 0.0680  | <a href="#">SGGLGDLKYPLVSDLTK</a> |

Mascot: <http://www.matrixscience.com/>

**MATRIX SCIENCE Mascot Search Results**

**Peptide View Spot no 21**

MS/MS Fragmentation of **APDFDAEAVFDQEFINVK**

Found in **gi|115446541** in **NCBI nr**, Os02g0537700 [Oryza sativa Japonica Group]

Match to Query 30: 2054.050824 from(2055.058100,1+) intensity(0.0000) index(10)

Title: Label: J7, Spot\_Id: 219779, Peak\_List\_Id: 226423, MSMS Job\_Run\_Id: 21843, Comment:

Data file C:\Documents and Settings\Administrator\Desktop\Farah-Garima 11May 2013\ppw\_J7\_136859916700.txt

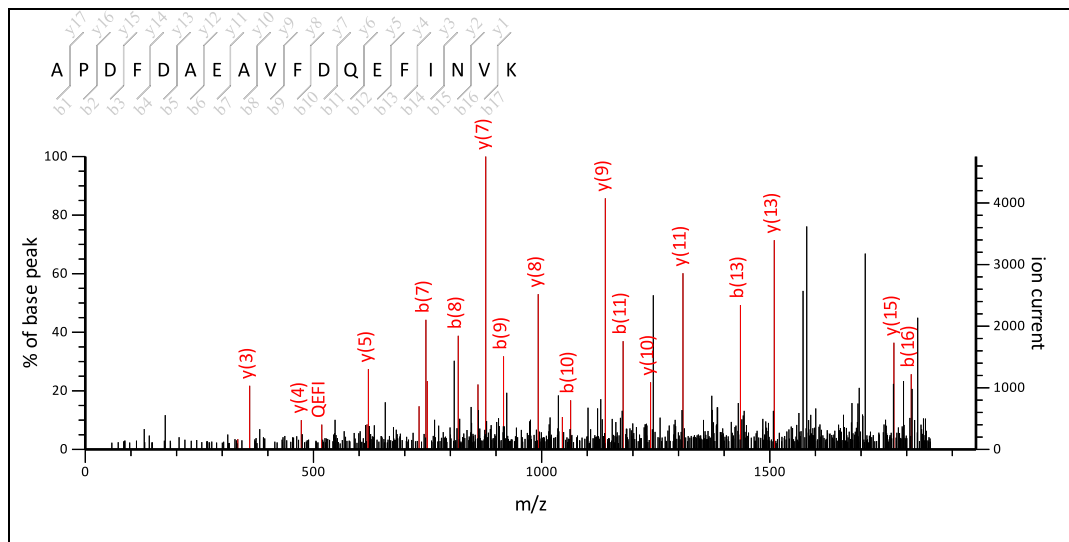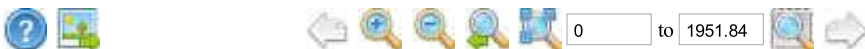

Label all possible matches  Label matches used for scoring

Monoisotopic mass of neutral peptide Mr(calc): 2053.9633

Fixed modifications: Carbamidomethyl (C) (apply to specified residues or termini only)

Ions Score: 54 Expect: 0.098

Matches : 29/305 fragment ions using 54 most intense peaks [\(help\)](#)

| #  | Immon.   | a         | a*        | a <sup>0</sup> | b         | b*        | b <sup>0</sup> | d         | d'        | Seq. | v         | w         | w'       | y         | y*        |
|----|----------|-----------|-----------|----------------|-----------|-----------|----------------|-----------|-----------|------|-----------|-----------|----------|-----------|-----------|
| 1  | 44.0495  | 44.0495   |           |                | 72.0444   |           |                | 44.0495   |           | A    |           |           |          |           |           |
| 2  | 70.0651  | 141.1022  |           |                | 169.0972  |           |                | 115.0866  |           | P    | 1941.8865 | 1940.8913 |          | 1983.9335 | 1966.9069 |
| 3  | 88.0393  | 256.1292  |           | 238.1186       | 284.1241  |           | 266.1135       | 212.1394  |           | D    | 1826.8596 | 1825.8643 |          | 1886.8807 | 1869.8541 |
| 4  | 120.0808 | 403.1976  |           | 385.1870       | 431.1925  |           | 413.1819       |           |           | F    | 1679.7911 |           |          | 1771.8537 | 1754.8272 |
| 5  | 88.0393  | 518.2245  |           | 500.2140       | 546.2195  |           | 528.2089       | 474.2347  |           | D    | 1564.7642 | 1563.7690 |          | 1624.7853 | 1607.7588 |
| 6  | 44.0495  | 589.2617  |           | 571.2511       | 617.2566  |           | 599.2460       |           |           | A    | 1493.7271 |           |          | 1509.7584 | 1492.7318 |
| 7  | 102.0550 | 718.3042  |           | 700.2937       | 746.2992  |           | 728.2886       | 660.2988  |           | E    | 1364.6845 | 1363.6892 |          | 1438.7213 | 1421.6947 |
| 8  | 44.0495  | 789.3414  |           | 771.3308       | 817.3363  |           | 799.3257       |           |           | A    | 1293.6474 |           |          | 1309.6787 | 1292.6521 |
| 9  | 72.0808  | 888.4098  |           | 870.3992       | 916.4047  |           | 898.3941       | 874.3941  |           | V    | 1194.5790 | 1207.5994 |          | 1238.6416 | 1221.6150 |
| 10 | 120.0808 | 1035.4782 |           | 1017.4676      | 1063.4731 |           | 1045.4625      |           |           | F    | 1047.5106 |           |          | 1139.5732 | 1122.5466 |
| 11 | 88.0393  | 1150.5051 |           | 1132.4946      | 1178.5000 |           | 1160.4895      | 1106.5153 |           | D    | 932.4836  | 931.4884  |          | 992.5047  | 975.4782  |
| 12 | 101.0709 | 1278.5637 | 1261.5372 | 1260.5531      | 1306.5586 | 1289.5321 | 1288.5481      | 1221.5422 |           | Q    | 804.4250  | 803.4298  |          | 877.4778  | 860.4512  |
| 13 | 102.0550 | 1407.6063 | 1390.5798 | 1389.5957      | 1435.6012 | 1418.5747 | 1417.5907      | 1349.6008 |           | E    | 675.3824  | 674.3872  |          | 749.4192  | 732.3927  |
| 14 | 120.0808 | 1554.6747 | 1537.6482 | 1536.6642      | 1582.6696 | 1565.6431 | 1564.6591      |           |           | F    | 528.3140  |           |          | 620.3766  | 603.3501  |
| 15 | 86.0964  | 1667.7588 | 1650.7322 | 1649.7482      | 1695.7537 | 1678.7271 | 1677.7431      | 1639.7275 | 1653.7431 | I    | 415.2300  | 428.2504  | 442.2660 | 473.3082  | 456.2817  |
| 16 | 87.0553  | 1781.8017 | 1764.7752 | 1763.7911      | 1809.7966 | 1792.7701 | 1791.7861      | 1738.7959 |           | N    | 301.1870  | 300.1918  |          | 360.2241  | 343.1976  |
| 17 | 72.0808  | 1880.8701 | 1863.8436 | 1862.8596      | 1908.8650 | 1891.8385 | 1890.8545      | 1866.8545 |           | V    | 202.1186  | 215.1390  |          | 246.1812  | 229.1547  |
| 18 | 101.1073 |           |           |                |           |           |                |           |           | K    | 74.0237   | 73.0284   |          | 147.1128  | 130.0863  |

| Seq   | ya       | yb       | Seq    | ya       | yb       | Seq   | ya       | yb       |
|-------|----------|----------|--------|----------|----------|-------|----------|----------|
| PD    | 185.0921 | 213.0870 | PDF    | 332.1605 | 360.1554 | PDFD  | 447.1874 | 475.1823 |
| PDFDA | 518.2245 | 546.2195 | PDFDAE | 647.2671 | 675.2620 | DF    | 235.1077 | 263.1026 |
| DFD   | 350.1347 | 378.1296 | DFDA   | 421.1718 | 449.1667 | DFDAE | 550.2144 | 578.2093 |



|               |                 |          |               |          |                 |               |          |                 |
|---------------|-----------------|----------|---------------|----------|-----------------|---------------|----------|-----------------|
| <b>DFDAEA</b> | 621.2515        | 649.2464 | <b>FD</b>     | 235.1077 | 263.1026        | <b>FDA</b>    | 306.1448 | <b>334.1397</b> |
| <b>FDAE</b>   | 435.1874        | 463.1823 | <b>FDAEA</b>  | 506.2245 | 534.2195        | <b>FDAEAV</b> | 605.2930 | 633.2879        |
| <b>DA</b>     | 159.0764        | 187.0713 | <b>DAE</b>    | 288.1190 | 316.1139        | <b>DAEA</b>   | 359.1561 | 387.1510        |
| <b>DAEAV</b>  | 458.2245        | 486.2195 | <b>DAEAVF</b> | 605.2930 | 633.2879        | <b>AE</b>     | 173.0921 | 201.0870        |
| <b>AEA</b>    | 244.1292        | 272.1241 | <b>AEAV</b>   | 343.1976 | 371.1925        | <b>AEAVF</b>  | 490.2660 | <b>518.2609</b> |
| <b>AEAVFD</b> | 605.2930        | 633.2879 | <b>EA</b>     | 173.0921 | 201.0870        | <b>EAV</b>    | 272.1605 | 300.1554        |
| <b>EAVF</b>   | 419.2289        | 447.2238 | <b>EAVFD</b>  | 534.2558 | 562.2508        | <b>EAVFDQ</b> | 662.3144 | 690.3093        |
| <b>AV</b>     | 143.1179        | 171.1128 | <b>AVF</b>    | 290.1863 | 318.1812        | <b>AVFD</b>   | 405.2132 | 433.2082        |
| <b>AVFDQ</b>  | 533.2718        | 561.2667 | <b>AVFDQE</b> | 662.3144 | 690.3093        | <b>VF</b>     | 219.1492 | 247.1441        |
| <b>VFD</b>    | <b>334.1761</b> | 362.1710 | <b>VFDQ</b>   | 462.2347 | 490.2296        | <b>VFDQE</b>  | 591.2773 | 619.2722        |
| <b>FD</b>     | 235.1077        | 263.1026 | <b>FDQ</b>    | 363.1663 | 391.1612        | <b>FDQE</b>   | 492.2089 | 520.2038        |
| <b>FDQEF</b>  | 639.2773        | 667.2722 | <b>DQ</b>     | 216.0979 | 244.0928        | <b>DQE</b>    | 345.1405 | 373.1354        |
| <b>DQEF</b>   | 492.2089        | 520.2038 | <b>DQEFI</b>  | 605.2930 | 633.2879        | <b>QE</b>     | 230.1135 | 258.1084        |
| <b>QEF</b>    | 377.1819        | 405.1769 | <b>QEFI</b>   | 490.2660 | <b>518.2609</b> | <b>QEFIN</b>  | 604.3089 | 632.3039        |
| <b>EF</b>     | 249.1234        | 277.1183 | <b>EFI</b>    | 362.2074 | 390.2023        | <b>EFIN</b>   | 476.2504 | 504.2453        |
| <b>EFINV</b>  | 575.3188        | 603.3137 | <b>FI</b>     | 233.1648 | 261.1598        | <b>FIN</b>    | 347.2078 | 375.2027        |
| <b>FINV</b>   | 446.2762        | 474.2711 | <b>IN</b>     | 200.1394 | 228.1343        | <b>INV</b>    | 299.2078 | 327.2027        |
| <b>NV</b>     | 186.1237        | 214.1186 |               |          |                 |               |          |                 |

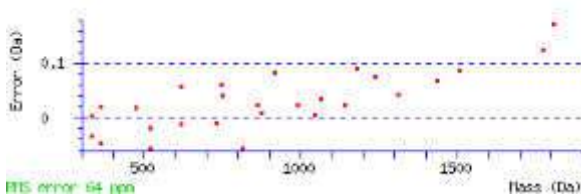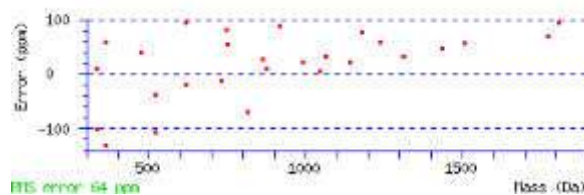

NCBI BLAST search of [APDFDAEAVFDQEFINVK](#)  
 (Parameters: blastp, nr protein database, expect=20000, no filter, PAM30)  
 Other BLAST [web gateways](#)

#### All matches to this query

| Score | Mr(calc)  | Delta   | Sequence                              |
|-------|-----------|---------|---------------------------------------|
| 54.0  | 2053.9633 | 0.0875  | <a href="#">APDFDAEAVFDQEFINVK</a>    |
| 20.8  | 2054.0029 | 0.0480  | <a href="#">HALTAVAVOTADETTADNAR</a>  |
| 19.2  | 2053.9858 | 0.0650  | <a href="#">TODQEKPFADPFTGAQTR</a>    |
| 18.7  | 2053.9482 | 0.1026  | <a href="#">MVEMVTGKETSLEEMGGAR</a>   |
| 18.5  | 2053.9819 | 0.0689  | <a href="#">QNQFDIAVMSALTYFYK</a>     |
| 15.5  | 2054.0255 | 0.0253  | <a href="#">GVQAAAYLAAFVEDMKASGR</a>  |
| 15.0  | 2054.1097 | -0.0589 | <a href="#">MLVLYLCVFLGDVPLER</a>     |
| 14.0  | 2054.0657 | -0.0149 | <a href="#">HAPAAVSDAFTATRLAGVSGR</a> |
| 13.9  | 2054.1637 | -0.1128 | <a href="#">RLFTGGNVALTALNGLPGVGK</a> |
| 13.7  | 2054.0003 | 0.0505  | <a href="#">MNNEIKVFSNNOFGQIR</a>     |

Mascot: <http://www.matrixscience.com/>



**MATRIX SCIENCE Mascot Search Results**

**Peptide View Spot no 21**

MS/MS Fragmentation of **GLFIIDKEGVIQHSTINNLAIGR**

Found in **gi|115446541** in **NCBI nr**, Os02g0537700 [Oryza sativa Japonica Group]

Match to Query 35: 2507.492924 from(2508.500200,1+) intensity(0.0000) index(12)

Title: Label: J7, Spot\_Id: 219779, Peak\_List\_Id: 226420, MSMS Job\_Run\_Id: 21843, Comment:

Data file C:\Documents and Settings\Administrator\Desktop\Farah-Garima 11May 2013\ppw\_J7\_136859916700.txt

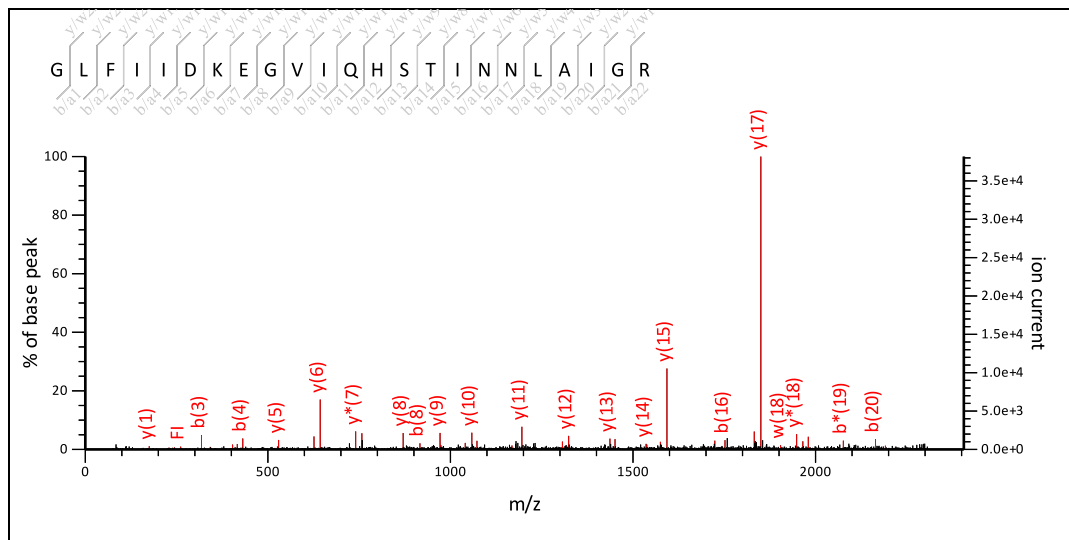

Navigation icons: Home, Back, Forward, Search, Print, etc. Range: 0 to 2406.12

Label all possible matches  Label matches used for scoring

Monoisotopic mass of neutral peptide Mr(calc): 2507.3860

Fixed modifications: Carbamidomethyl (C) (apply to specified residues or termini only)

Ions Score: 110 Expect: 1e-07

Matches : 53/437 fragment ions using 69 most intense peaks [\(help\)](#)

| #  | Immon.   | a                | a*        | a <sup>0</sup>   | b                | b*               | b <sup>0</sup> | d         | d'        | Seq. | v         | w                | w'        | y                | y*               |
|----|----------|------------------|-----------|------------------|------------------|------------------|----------------|-----------|-----------|------|-----------|------------------|-----------|------------------|------------------|
| 1  | 30.0338  | 30.0338          |           |                  | 58.0287          |                  |                | 44.0495   |           | G    |           |                  |           |                  |                  |
| 2  | 86.0964  | 143.1179         |           |                  | 171.1128         |                  |                | 101.0709  |           | L    | 2393.2936 | 2392.2983        |           | 2451.3718        | 2434.3453        |
| 3  | 120.0808 | 290.1863         |           |                  | <b>318.1812</b>  |                  |                |           |           | F    | 2246.2252 |                  |           | 2338.2878        | 2321.2612        |
| 4  | 86.0964  | <b>403.2704</b>  |           |                  | <b>431.2653</b>  |                  |                | 375.2391  | 389.2547  | I    | 2133.1411 | 2146.1615        | 2160.1771 | <b>2191.2193</b> | 2174.1928        |
| 5  | 86.0964  | 516.3544         |           |                  | 544.3493         |                  |                | 488.3231  | 502.3388  | I    | 2020.0570 | 2033.0774        | 2047.0931 | 2078.1353        | 2061.1087        |
| 6  | 88.0393  | 631.3814         |           | 613.3708         | 659.3763         |                  | 641.3657       | 587.3915  |           | D    | 1905.0301 | <b>1904.0348</b> |           | <b>1965.0512</b> | <b>1948.0247</b> |
| 7  | 101.1073 | 759.4763         | 742.4498  | 741.4658         | 787.4713         | 770.4447         | 769.4607       | 702.4185  |           | K    | 1776.9351 | 1775.9399        |           | <b>1850.0243</b> | 1832.9977        |
| 8  | 102.0550 | 888.5189         | 871.4924  | <b>870.5084</b>  | <b>916.5138</b>  | 899.4873         | 898.5033       | 830.5135  |           | E    | 1647.8925 | 1646.8973        |           | 1721.9293        | 1704.9028        |
| 9  | 30.0338  | 945.5404         | 928.5138  | 927.5298         | <b>973.5353</b>  | 956.5088         | 955.5247       |           |           | G    |           |                  |           | <b>1592.8867</b> | 1575.8602        |
| 10 | 72.0808  | 1044.6088        | 1027.5823 | 1026.5982        | <b>1072.6037</b> | 1055.5772        | 1054.5932      | 1030.5932 |           | V    | 1491.8027 | 1504.8231        |           | <b>1535.8653</b> | 1518.8387        |
| 11 | 86.0964  | 1157.6929        | 1140.6663 | 1139.6823        | 1185.6878        | <b>1168.6612</b> | 1167.6772      | 1129.6616 | 1143.6772 | I    | 1378.7186 | 1391.7390        | 1405.7546 | <b>1436.7968</b> | 1419.7703        |
| 12 | 101.0709 | 1285.7515        | 1268.7249 | 1267.7409        | 1313.7464        | 1296.7198        | 1295.7358      | 1228.7300 |           | Q    | 1250.6600 | 1249.6648        |           | <b>1323.7128</b> | <b>1306.6862</b> |
| 13 | 110.0713 | 1422.8104        | 1405.7838 | 1404.7998        | <b>1450.8053</b> | 1433.7787        | 1432.7947      |           |           | H    | 1113.6011 |                  |           | <b>1195.6542</b> | 1178.6276        |
| 14 | 60.0444  | 1509.8424        | 1492.8158 | 1491.8318        | <b>1537.8373</b> | 1520.8108        | 1519.8267      | 1493.8475 |           | S    | 1026.5691 | 1025.5738        |           | <b>1058.5953</b> | 1041.5687        |
| 15 | 74.0600  | 1610.8901        | 1593.8635 | <b>1592.8795</b> | 1638.8850        | 1621.8584        | 1620.8744      | 1594.8952 | 1596.8744 | T    | 925.5214  | 938.5418         | 940.5211  | <b>971.5633</b>  | 954.5367         |
| 16 | 86.0964  | <b>1723.9741</b> | 1706.9476 | 1705.9636        | <b>1751.9690</b> | 1734.9425        | 1733.9585      | 1695.9428 | 1709.9585 | I    | 812.4373  | 825.4577         | 839.4734  | <b>870.5156</b>  | 853.4890         |
| 17 | 87.0553  | 1838.0171        | 1820.9905 | 1820.0065        | 1866.0120        | 1848.9854        | 1848.0014      | 1795.0112 |           | N    | 698.3944  | 697.3992         |           | <b>757.4315</b>  | <b>740.4050</b>  |
| 18 | 87.0553  | 1952.0600        | 1935.0334 | 1934.0494        | <b>1980.0549</b> | 1963.0284        | 1962.0443      | 1909.0542 |           | N    | 584.3515  | 583.3562         |           | <b>643.3886</b>  | <b>626.3620</b>  |
| 19 | 86.0964  | 2065.1441        | 2048.1175 | 2047.1335        | 2093.1390        | <b>2076.1124</b> | 2075.1284      | 2023.0971 |           | L    | 471.2674  | 470.2722         |           | <b>529.3457</b>  | 512.3191         |
| 20 | 44.0495  | 2136.1812        | 2119.1546 | 2118.1706        | <b>2164.1761</b> | 2147.1495        | 2146.1655      |           |           | A    | 400.2303  |                  |           | <b>416.2616</b>  | 399.2350         |
| 21 | 86.0964  | 2249.2652        | 2232.2387 | 2231.2547        | 2277.2601        | 2260.2336        | 2259.2496      | 2221.2339 | 2235.2496 | I    | 287.1462  | 300.1666         | 314.1823  | 345.2245         | 328.1979         |
| 22 | 30.0338  | 2306.2867        | 2289.2601 | 2288.2761        | 2334.2816        | 2317.2551        | 2316.2710      |           |           | G    |           |                  |           | 232.1404         | 215.1139         |
| 23 | 129.1135 |                  |           |                  |                  |                  |                |           |           | R    | 74.0237   | 73.0284          |           | <b>175.1190</b>  | 158.0924         |

| Seq     | ya       | yb       | Seq    | ya       | yb       | Seq     | ya       | yb       |
|---------|----------|----------|--------|----------|----------|---------|----------|----------|
| LF      | 233.1648 | 261.1598 | LFI    | 346.2489 | 374.2438 | LFII    | 459.3330 | 487.3279 |
| LFID    | 574.3599 | 602.3548 | FI     | 233.1648 | 261.1598 | FII     | 346.2489 | 374.2438 |
| FID     | 461.2758 | 489.2708 | FIDK   | 589.3708 | 617.3657 | II      | 199.1805 | 227.1754 |
| IID     | 314.2074 | 342.2023 | IDK    | 442.3024 | 470.2973 | IIDKE   | 571.3450 | 599.3399 |
| IIDKEG  | 628.3665 | 656.3614 | ID     | 201.1234 | 229.1183 | IDK     | 329.2183 | 357.2132 |
| IDKE    | 458.2609 | 486.2558 | IDKEG  | 515.2824 | 543.2773 | IDKEGV  | 614.3508 | 642.3457 |
| DK      | 216.1343 | 244.1292 | DKE    | 345.1769 | 373.1718 | DKEG    | 402.1983 | 430.1932 |
| DKEGV   | 501.2667 | 529.2617 | DKEGVI | 614.3508 | 642.3457 | KE      | 230.1499 | 258.1448 |
| KEG     | 287.1714 | 315.1663 | KEGV   | 386.2398 | 414.2347 | KEGVI   | 499.3239 | 527.3188 |
| KEGVIQ  | 627.3824 | 655.3774 | EG     | 159.0764 | 187.0713 | EGV     | 258.1448 | 286.1397 |
| EGVI    | 371.2289 | 399.2238 | EGVIQ  | 499.2875 | 527.2824 | EGVIQH  | 636.3464 | 664.3413 |
| GV      | 129.1022 | 157.0972 | GVI    | 242.1863 | 270.1812 | GVIQ    | 370.2449 | 398.2398 |
| GVIQH   | 507.3038 | 535.2987 | GVIQHS | 594.3358 | 622.3307 | GVIQHST | 695.3835 | 723.3784 |
| VI      | 185.1648 | 213.1598 | VIQ    | 313.2234 | 341.2183 | VIQH    | 450.2823 | 478.2772 |
| VIQHS   | 537.3144 | 565.3093 | VIQHST | 638.3620 | 666.3570 | IQ      | 214.1550 | 242.1499 |
| IQH     | 351.2139 | 379.2088 | IQHS   | 438.2459 | 466.2409 | IQHST   | 539.2936 | 567.2885 |
| IQHSTI  | 652.3777 | 680.3726 | QH     | 238.1299 | 266.1248 | QHS     | 325.1619 | 353.1568 |
| QHST    | 426.2096 | 454.2045 | QHSTI  | 539.2936 | 567.2885 | QHSTIN  | 653.3365 | 681.3315 |
| HS      | 197.1033 | 225.0982 | HST    | 298.1510 | 326.1459 | HSTI    | 411.2350 | 439.2300 |
| HSTIN   | 525.2780 | 553.2729 | HSTINN | 639.3209 | 667.3158 | ST      | 161.0921 | 189.0870 |
| STI     | 274.1761 | 302.1710 | STIN   | 388.2191 | 416.2140 | STINN   | 502.2620 | 530.2569 |
| STINNL  | 615.3461 | 643.3410 | STINLA | 686.3832 | 714.3781 | TI      | 187.1441 | 215.1390 |
| TIN     | 301.1870 | 329.1819 | TINN   | 415.2300 | 443.2249 | TINNL   | 528.3140 | 556.3089 |
| TINLA   | 599.3511 | 627.3461 | IN     | 200.1394 | 228.1343 | INN     | 314.1823 | 342.1772 |
| INN     | 427.2663 | 455.2613 | INNLA  | 498.3035 | 526.2984 | INNLA   | 611.3875 | 639.3824 |
| INNLAIG | 668.4090 | 696.4039 | NN     | 201.0982 | 229.0931 | NNL     | 314.1823 | 342.1772 |
| NNLA    | 385.2194 | 413.2143 | NNLAI  | 498.3035 | 526.2984 | NNLAIG  | 555.3249 | 583.3198 |
| NL      | 200.1394 | 228.1343 | NLA    | 271.1765 | 299.1714 | NLAI    | 384.2605 | 412.2554 |
| NLAIG   | 441.2820 | 469.2769 | LA     | 157.1335 | 185.1285 | LAI     | 270.2176 | 298.2125 |
| LAIG    | 327.2391 | 355.2340 | AI     | 157.1335 | 185.1285 | AIG     | 214.1550 | 242.1499 |
| IG      | 143.1179 | 171.1128 |        |          |          |         |          |          |

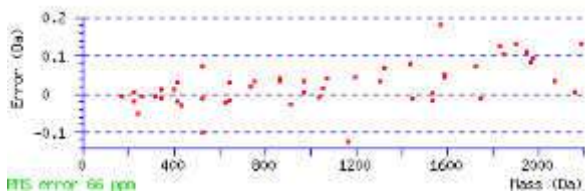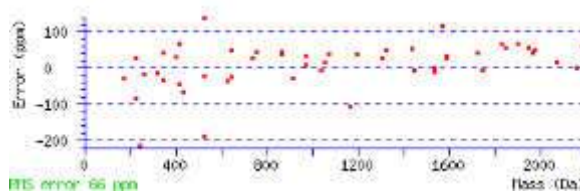

NCBI BLAST search of [GLFIIDKEGVIOHSTINNLAIGR](#)  
 (Parameters: blastp, nr protein database, expect=20000, no filter, PAM30)  
 Other BLAST [web gateways](#)

#### All matches to this query

| Score | Mr(calcd) | Delta  | Sequence                                  |
|-------|-----------|--------|-------------------------------------------|
| 110.2 | 2507.3860 | 0.1069 | <a href="#">GLFIIDKEGVIOHSTINNLAIGR</a>   |
| 72.1  | 2507.3860 | 0.1069 | <a href="#">GLFIIDKEGVIOHSTIQNLGIGR</a>   |
| 13.8  | 2507.3860 | 0.1069 | <a href="#">GLFIIDKEGIIQHSTINNLGIGR</a>   |
| 12.6  | 2507.2703 | 0.2226 | <a href="#">MPHIRPDGDPVRLTSNFONGLK</a>    |
| 11.9  | 2507.2512 | 0.2417 | <a href="#">GNOTIOMANFGAGDIVAIMIGNLK</a>  |
| 11.1  | 2507.4111 | 0.0818 | <a href="#">EATAPSRLFLVGAVLPPELVEAAVR</a> |
| 10.5  | 2507.2631 | 0.2298 | <a href="#">WGERPMAFVILTPAAEKEYAGR</a>    |
| 9.8   | 2507.3384 | 0.1545 | <a href="#">TGNYLQONFGLITGVSEVEIKLR</a>   |
| 9.8   | 2507.2626 | 0.2303 | <a href="#">LPAYMIPSAFVMLSTMPLNPNKGK</a>  |
| 9.7   | 2507.2763 | 0.2166 | <a href="#">LGLMEIENRLOSDLAELFLCK</a>     |

**Mascot:** <http://www.matrixscience.com/>


**Mascot Search Results**
**Peptide View Spot no 21**

 MS/MS Fragmentation of **TLQALQYVQDNPEVCPAGWKPGDK**

 Found in **gi|115446541** in **NCBIInr**, Os02g0537700 [Oryza sativa Japonica Group]

Match to Query 37: 2828.469024 from(2829.476300,1+) intensity(0.0000) index(13)

Title: Label: J7, Spot\_Id: 219779, Peak\_List\_Id: 226427, MSMS Job\_Run\_Id: 21843, Comment:

Data file C:\Documents and Settings\Administrator\Desktop\Farah-Garima 11May 2013\ppw\_J7\_136859916700.txt

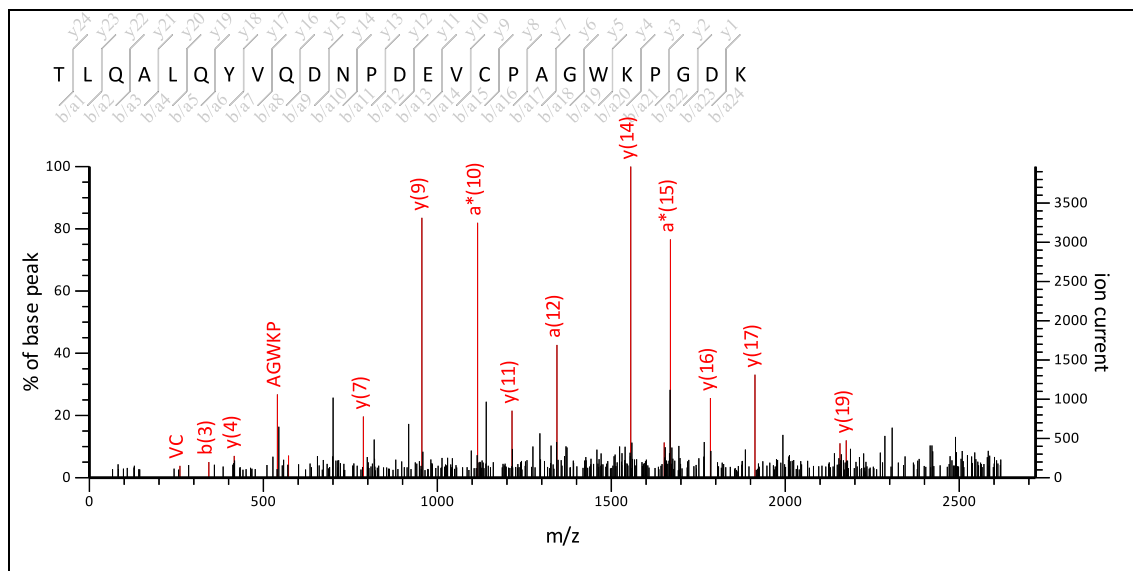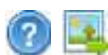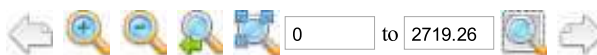
 Label all possible matches  Label matches used for scoring 

 Monoisotopic mass of neutral peptide **Mr(calc)**: 2828.3439

Fixed modifications: Carbamidomethyl (C) (apply to specified residues or termini only)

Ions Score: 71 Expect: 0.0015

 Matches : 22/487 fragment ions using 26 most intense peaks ([help](#))

| #  | Immon.   | a         | a*        | a <sup>0</sup> | b         | b*        | b <sup>0</sup> | d         | Seq. | v         | w         | y         | y*        | y <sup>0</sup> | #  |
|----|----------|-----------|-----------|----------------|-----------|-----------|----------------|-----------|------|-----------|-----------|-----------|-----------|----------------|----|
| 1  | 74.0600  | 74.0600   |           | 56.0495        | 102.0550  |           | 84.0444        | 44.0495   | T    |           |           |           |           |                | 25 |
| 2  | 86.0964  | 187.1441  |           | 169.1335       | 215.1390  |           | 197.1285       | 145.0972  | L    | 2670.2253 | 2669.2300 | 2728.3035 | 2711.2770 | 2710.2930      | 24 |
| 3  | 101.0709 | 315.2027  | 298.1761  | 297.1921       | 343.1976  | 326.1710  | 325.1870       | 258.1812  | Q    | 2542.1667 | 2541.1715 | 2615.2195 | 2598.1929 | 2597.2089      | 23 |
| 4  | 44.0495  | 386.2398  | 369.2132  | 368.2292       | 414.2347  | 397.2082  | 396.2241       |           | A    | 2471.1296 |           | 2487.1609 | 2470.1344 | 2469.1503      | 22 |
| 5  | 86.0964  | 499.3239  | 482.2973  | 481.3133       | 527.3188  | 510.2922  | 509.3082       | 457.2769  | L    | 2358.0455 | 2357.0503 | 2416.1238 | 2399.0972 | 2398.1132      | 21 |
| 6  | 101.0709 | 627.3824  | 610.3559  | 609.3719       | 655.3774  | 638.3508  | 637.3668       | 570.3610  | Q    | 2229.9870 | 2228.9917 | 2303.0397 | 2286.0132 | 2285.0292      | 20 |
| 7  | 136.0757 | 790.4458  | 773.4192  | 772.4352       | 818.4407  | 801.4141  | 800.4301       |           | Y    | 2066.9236 |           | 2174.9811 | 2157.9546 | 2156.9706      | 19 |
| 8  | 72.0808  | 889.5142  | 872.4876  | 871.5036       | 917.5091  | 900.4825  | 899.4985       | 875.4985  | V    | 1967.8552 | 1980.8756 | 2011.9178 | 1994.8913 | 1993.9073      | 18 |
| 9  | 101.0709 | 1017.5728 | 1000.5462 | 999.5622       | 1045.5677 | 1028.5411 | 1027.5571      | 960.5513  | Q    | 1839.7966 | 1838.8014 | 1912.8494 | 1895.8229 | 1894.8388      | 17 |
| 10 | 88.0393  | 1132.5997 | 1115.5732 | 1114.5891      | 1160.5946 | 1143.5681 | 1142.5841      | 1088.6099 | D    | 1724.7697 | 1723.7744 | 1784.7908 | 1767.7643 | 1766.7803      | 16 |
| 11 | 87.0553  | 1246.6426 | 1229.6161 | 1228.6321      | 1274.6375 | 1257.6110 | 1256.6270      | 1203.6368 | N    | 1610.7268 | 1609.7315 | 1669.7639 | 1652.7373 | 1651.7533      | 15 |
| 12 | 70.0651  | 1343.6954 | 1326.6688 | 1325.6848      | 1371.6903 | 1354.6638 | 1353.6797      | 1317.6797 | P    | 1513.6740 | 1512.6788 | 1555.7210 | 1538.6944 | 1537.7104      | 14 |
| 13 | 88.0393  | 1458.7223 | 1441.6958 | 1440.7118      | 1486.7173 | 1469.6907 | 1468.7067      | 1414.7325 | D    | 1398.6471 | 1397.6518 | 1458.6682 | 1441.6416 | 1440.6576      | 13 |
| 14 | 102.0550 | 1587.7649 | 1570.7384 | 1569.7544      | 1615.7598 | 1598.7333 | 1597.7493      | 1529.7595 | E    | 1269.6045 | 1268.6092 | 1343.6412 | 1326.6147 | 1325.6307      | 12 |
| 15 | 72.0808  | 1686.8333 | 1669.8068 | 1668.8228      | 1714.8283 | 1697.8017 | 1696.8177      | 1672.8177 | V    | 1170.5361 | 1183.5565 | 1214.5987 | 1197.5721 | 1196.5881      | 11 |
| 16 | 133.0430 | 1846.8640 | 1829.8374 | 1828.8534      | 1874.8589 | 1857.8324 | 1856.8483      | 1757.8705 | C    | 1010.5054 | 1009.5102 | 1115.5302 | 1098.5037 | 1097.5197      | 10 |
| 17 | 70.0651  | 1943.9168 | 1926.8902 | 1925.9062      | 1971.9117 | 1954.8851 | 1953.9011      | 1917.9011 | P    | 913.4526  | 912.4574  | 955.4996  | 938.4730  | 937.4890       | 9  |
| 18 | 44.0495  | 2014.9539 | 1997.9273 | 1996.9433      | 2042.9488 | 2025.9222 | 2024.9382      |           | A    | 842.4155  |           | 858.4468  | 841.4203  | 840.4363       | 8  |
| 19 | 30.0338  | 2071.9753 | 2054.9488 | 2053.9648      | 2099.9702 | 2082.9437 | 2081.9597      |           | G    |           |           | 787.4097  | 770.3832  | 769.3992       | 7  |

|    |          |           |           |           |           |           |           |           |   |          |          |          |          |          |   |
|----|----------|-----------|-----------|-----------|-----------|-----------|-----------|-----------|---|----------|----------|----------|----------|----------|---|
| 20 | 159.0917 | 2258.0546 | 2241.0281 | 2240.0441 | 2286.0496 | 2269.0230 | 2268.0390 |           | W | 599.3148 |          | 730.3883 | 713.3617 | 712.3777 | 6 |
| 21 | 101.1073 | 2386.1496 | 2369.1231 | 2368.1390 | 2414.1445 | 2397.1180 | 2396.1340 | 2329.0918 | K | 471.2198 | 470.2245 | 544.3089 | 527.2824 | 526.2984 | 5 |
| 22 | 70.0651  | 2483.2024 | 2466.1758 | 2465.1918 | 2511.1973 | 2494.1707 | 2493.1867 | 2457.1867 | P | 374.1670 | 373.1718 | 416.2140 | 399.1874 | 398.2034 | 4 |
| 23 | 30.0338  | 2540.2238 | 2523.1973 | 2522.2133 | 2568.2188 | 2551.1922 | 2550.2082 |           | G |          |          | 319.1612 | 302.1347 | 301.1506 | 3 |
| 24 | 88.0393  | 2655.2508 | 2638.2242 | 2637.2402 | 2683.2457 | 2666.2191 | 2665.2351 | 2611.2610 | D | 202.1186 | 201.1234 | 262.1397 | 245.1132 | 244.1292 | 2 |
| 25 | 101.1073 |           |           |           |           |           |           |           | K | 74.0237  | 73.0284  | 147.1128 | 130.0863 |          | 1 |

| Seq     | ya       | yb       | Seq    | ya       | yb       | Seq    | ya       | yb       |
|---------|----------|----------|--------|----------|----------|--------|----------|----------|
| LQ      | 214.1550 | 242.1499 | LQA    | 285.1921 | 313.1870 | LQAL   | 398.2762 | 426.2711 |
| LQALQ   | 526.3348 | 554.3297 | LQALQY | 689.3981 | 717.3930 | QA     | 172.1081 | 200.1030 |
| QAL     | 285.1921 | 313.1870 | QALQ   | 413.2507 | 441.2456 | QALQY  | 576.3140 | 604.3089 |
| QALQYV  | 675.3824 | 703.3774 | AL     | 157.1335 | 185.1285 | ALQ    | 285.1921 | 313.1870 |
| ALQY    | 448.2554 | 476.2504 | ALQYV  | 547.3239 | 575.3188 | ALQYVQ | 675.3824 | 703.3774 |
| LQ      | 214.1550 | 242.1499 | LQY    | 377.2183 | 405.2132 | LQYV   | 476.2867 | 504.2817 |
| LQYVQ   | 604.3453 | 632.3402 | QY     | 264.1343 | 292.1292 | QYV    | 363.2027 | 391.1976 |
| QYVQ    | 491.2613 | 519.2562 | QYVQD  | 606.2882 | 634.2831 | YV     | 235.1441 | 263.1390 |
| YVQ     | 363.2027 | 391.1976 | YVQD   | 478.2296 | 506.2245 | YVQDN  | 592.2726 | 620.2675 |
| YVQDNP  | 689.3253 | 717.3202 | VQ     | 200.1394 | 228.1343 | VQD    | 315.1663 | 343.1612 |
| VQDN    | 429.2092 | 457.2041 | VQDNP  | 526.2620 | 554.2569 | VQDNPD | 641.2889 | 669.2838 |
| QD      | 216.0979 | 244.0928 | QDN    | 330.1408 | 358.1357 | QDNP   | 427.1936 | 455.1885 |
| QDNP    | 542.2205 | 570.2154 | QDNPDE | 671.2631 | 699.2580 | DN     | 202.0822 | 230.0771 |
| DNP     | 299.1350 | 327.1299 | DNP    | 414.1619 | 442.1569 | DNPDE  | 543.2045 | 571.1994 |
| DNPDEV  | 642.2729 | 670.2679 | NP     | 184.1081 | 212.1030 | NPD    | 299.1350 | 327.1299 |
| NPDE    | 428.1776 | 456.1725 | NPDEV  | 527.2460 | 555.2409 | NPDEVC | 687.2767 | 715.2716 |
| PD      | 185.0921 | 213.0870 | PDE    | 314.1347 | 342.1296 | PDEV   | 413.2031 | 441.1980 |
| PDEV    | 573.2337 | 601.2286 | PDEVCP | 670.2865 | 698.2814 | DE     | 217.0819 | 245.0768 |
| DEV     | 316.1503 | 344.1452 | DEV    | 476.1810 | 504.1759 | DEVCP  | 573.2337 | 601.2286 |
| DEVCPA  | 644.2708 | 672.2658 | EV     | 201.1234 | 229.1183 | EVC    | 361.1540 | 389.1489 |
| EVC     | 458.2068 | 486.2017 | EVC    | 529.2439 | 557.2388 | EVC    | 586.2654 | 614.2603 |
| VC      | 232.1114 | 260.1063 | VCP    | 329.1642 | 357.1591 | VCPA   | 400.2013 | 428.1962 |
| VCPAG   | 457.2228 | 485.2177 | VCPAGW | 643.3021 | 671.2970 | CP     | 230.0958 | 258.0907 |
| CPA     | 301.1329 | 329.1278 | CPAG   | 358.1544 | 386.1493 | CPAGW  | 544.2337 | 572.2286 |
| CPAGWK  | 672.3286 | 700.3235 | PA     | 141.1022 | 169.0972 | PAG    | 198.1237 | 226.1186 |
| PAGW    | 384.2030 | 412.1979 | PAGWK  | 512.2980 | 540.2929 | PAGWK  | 609.3507 | 637.3457 |
| PAGWKPG | 666.3722 | 694.3671 | AG     | 101.0709 | 129.0659 | AGW    | 287.1503 | 315.1452 |
| AGWK    | 415.2452 | 443.2401 | AGWK   | 512.2980 | 540.2929 | AGWKPG | 569.3194 | 597.3144 |
| AGWKPGD | 684.3464 | 712.3413 | GW     | 216.1131 | 244.1081 | GWK    | 344.2081 | 372.2030 |
| GWK     | 441.2609 | 469.2558 | GWKPG  | 498.2823 | 526.2772 | GWKPGD | 613.3093 | 641.3042 |
| WK      | 287.1866 | 315.1816 | WKP    | 384.2394 | 412.2343 | WKPG   | 441.2609 | 469.2558 |
| WKPGD   | 556.2878 | 584.2827 | KP     | 198.1601 | 226.1550 | KPG    | 255.1816 | 283.1765 |
| KPGD    | 370.2085 | 398.2034 | PG     | 127.0866 | 155.0815 | PGD    | 242.1135 | 270.1084 |
| GD      | 145.0608 | 173.0557 |        |          |          |        |          |          |

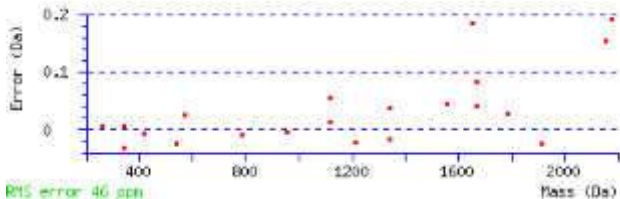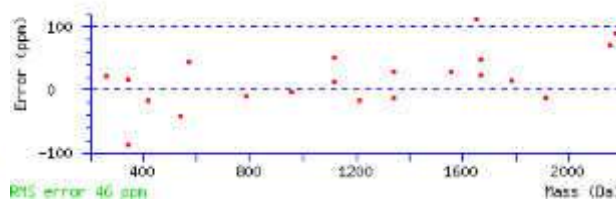

NCBI BLAST search of [TLOALQYVQDNPDEVCPAGWKPGDK](#)  
 (Parameters: blastp, nr protein database, expect=20000, no filter, PAM30)  
 Other BLAST [web gateways](#)

All matches to this query

| Score | Mr(calc)  | Delta   | Sequence                                       |
|-------|-----------|---------|------------------------------------------------|
| 70.5  | 2828.3439 | 0.1251  | <a href="#">TLOALQYVQDNPDEVCPAGWKPGDK</a>      |
| 11.4  | 2828.4630 | 0.0061  | <a href="#">KMVAEEGGVSPEEVILVELYPSGLQR</a>     |
| 9.6   | 2828.4888 | -0.0198 | <a href="#">MOVVAMASALLSQGPALSOAGSDLLRSK</a>   |
| 9.1   | 2828.3941 | 0.0750  | <a href="#">OGGSDVRANTTTAIPIDDGTYELLGHK</a>    |
| 8.3   | 2828.4234 | 0.0456  | <a href="#">GIPVAAMEIMDEVQMKVVNIGGATAPR</a>    |
| 8.3   | 2828.4234 | 0.0456  | <a href="#">GIPVAAMEIMDEVQMKVVNLGGATAPR</a>    |
| 8.2   | 2828.3076 | 0.1615  | <a href="#">DLFSDHKWNILCAPDGAVSSDPOEK</a>      |
| 7.7   | 2828.3763 | 0.0927  | <a href="#">VLDEVVACAGSGNPADTAGGALAAFTAPAR</a> |
| 7.6   | 2828.2877 | 0.1813  | <a href="#">AMAQQTEGMDIESEAAAALDSKASAMLK</a>   |
| 7.6   | 2828.2877 | 0.1813  | <a href="#">AMAQQTEGMDIESEAAAALDSKASAMLK</a>   |

Mascot: <http://www.matrixscience.com/>



# Mascot Search Results

## Peptide View **Spot no 23**

MS/MS Fragmentation of **YMFVSCADSR**

Found in **gi|3345477** in **NCBIInr**, carbonic anhydrase [Oryza sativa]

Match to Query 21: 1234.592824 from(1235.600100,1+) intensity(0.0000) index(9)

Title: Label: G9, Spot\_Id: 228976, Peak\_List\_Id: 257846, MSMS Job\_Run\_Id: 24939, Comment:

Data file ppw\_G9\_138985152400.txt

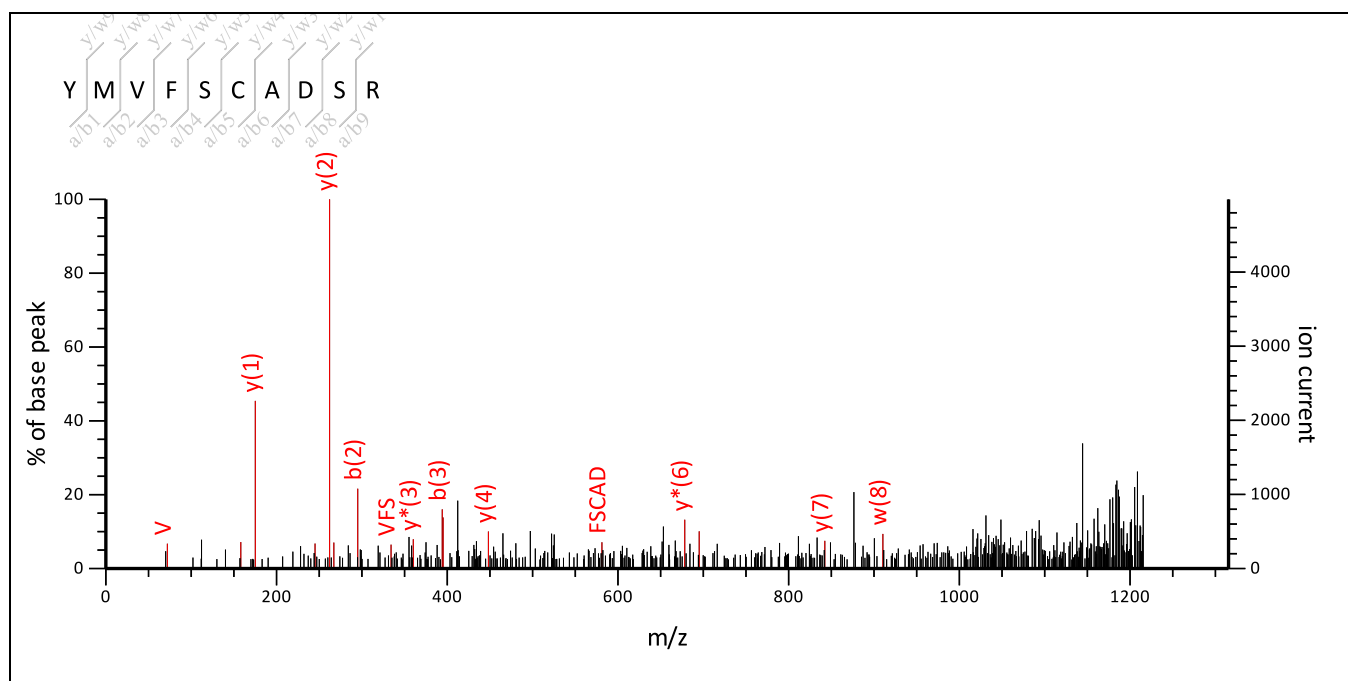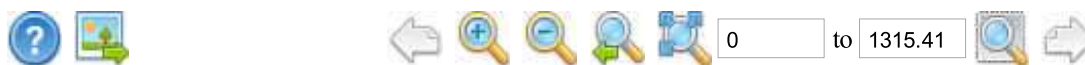

Label all possible matches  Label matches used for scoring

**Monoisotopic mass of neutral peptide Mr(calc):** 1234.5111

**Fixed modifications:** Carbamidomethyl (C) (apply to specified residues or termini only)

**Ions Score:** 10 **Expect:** 2.6e+02

**Matches:** 18/137 fragment ions using 48 most intense peaks ([help](#))

| #  | Immon.   | a         | a <sup>0</sup> | b         | b <sup>0</sup> | d         | Seq. | v        | w        | y         | y*        | y <sup>0</sup> | #  |
|----|----------|-----------|----------------|-----------|----------------|-----------|------|----------|----------|-----------|-----------|----------------|----|
| 1  | 136.0757 | 136.0757  |                | 164.0706  |                | 44.0495   | Y    |          |          |           |           |                | 10 |
| 2  | 104.0528 | 267.1162  |                | 295.1111  |                | 207.1128  | M    | 996.4204 | 995.4251 | 1072.4550 | 1055.4285 | 1054.4445      | 9  |
| 3  | 72.0808  | 366.1846  |                | 394.1795  |                | 352.1689  | V    | 897.3519 | 910.3723 | 941.4145  | 924.3880  | 923.4040       | 8  |
| 4  | 120.0808 | 513.2530  |                | 541.2479  |                |           | F    | 750.2835 |          | 842.3461  | 825.3196  | 824.3356       | 7  |
| 5  | 60.0444  | 600.2850  | 582.2745       | 628.2799  | 610.2694       | 584.2901  | S    | 663.2515 | 662.2563 | 695.2777  | 678.2512  | 677.2671       | 6  |
| 6  | 133.0430 | 760.3157  | 742.3051       | 788.3106  | 770.3000       | 671.3221  | C    | 503.2209 | 502.2256 | 608.2457  | 591.2191  | 590.2351       | 5  |
| 7  | 44.0495  | 831.3528  | 813.3422       | 859.3477  | 841.3371       |           | A    | 432.1837 |          | 448.2150  | 431.1885  | 430.2045       | 4  |
| 8  | 88.0393  | 946.3797  | 928.3692       | 974.3747  | 956.3641       | 902.3899  | D    | 317.1568 | 316.1615 | 377.1779  | 360.1514  | 359.1674       | 3  |
| 9  | 60.0444  | 1033.4118 | 1015.4012      | 1061.4067 | 1043.3961      | 1017.4169 | S    | 230.1248 | 229.1295 | 262.1510  | 245.1244  | 244.1404       | 2  |
| 10 | 129.1135 |           |                |           |                |           | R    | 74.0237  | 73.0284  | 175.1190  | 158.0924  |                | 1  |



| Seq           | ya              | yb              | Seq           | ya       | yb              | Seq           | ya       | yb              |
|---------------|-----------------|-----------------|---------------|----------|-----------------|---------------|----------|-----------------|
| <b>MV</b>     | 203.1213        | 231.1162        | <b>MVF</b>    | 350.1897 | 378.1846        | <b>MVFS</b>   | 437.2217 | 465.2166        |
| <b>MVFSC</b>  | 597.2524        | 625.2473        | <b>MVFSCA</b> | 668.2895 | 696.2844        | <b>VF</b>     | 219.1492 | 247.1441        |
| <b>VFS</b>    | 306.1812        | <b>334.1761</b> | <b>VFSC</b>   | 466.2119 | 494.2068        | <b>VFSCA</b>  | 537.2490 | 565.2439        |
| <b>VFSCAD</b> | 652.2759        | 680.2708        | <b>FS</b>     | 207.1128 | 235.1077        | <b>FSC</b>    | 367.1435 | <b>395.1384</b> |
| <b>FSCA</b>   | 438.1806        | 466.1755        | <b>FSCAD</b>  | 553.2075 | <b>581.2024</b> | <b>FSCADS</b> | 640.2395 | 668.2345        |
| <b>SC</b>     | 220.0750        | 248.0700        | <b>SCA</b>    | 291.1122 | 319.1071        | <b>SCAD</b>   | 406.1391 | 434.1340        |
| <b>SCADS</b>  | 493.1711        | 521.1660        | <b>CA</b>     | 204.0801 | 232.0750        | <b>CAD</b>    | 319.1071 | 347.1020        |
| <b>CADS</b>   | 406.1391        | 434.1340        | <b>AD</b>     | 159.0764 | 187.0713        | <b>ADS</b>    | 246.1084 | 274.1034        |
| <b>DS</b>     | <b>175.0713</b> | 203.0662        |               |          |                 |               |          |                 |

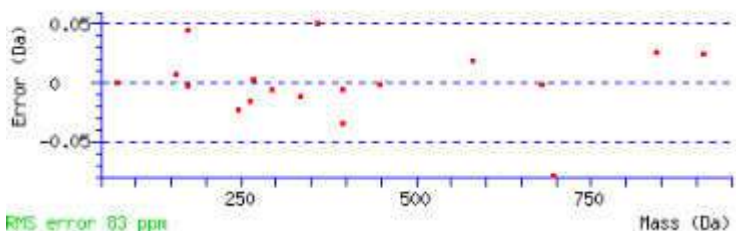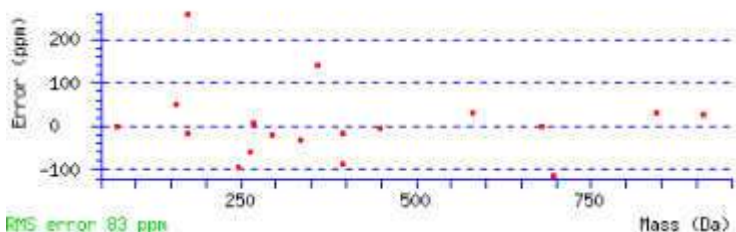

NCBI **BLAST** search of [YMFVSCADSR](#)

(Parameters: blastp, nr protein database, expect=20000, no filter, PAM30)

Other BLAST [web gateways](#)

#### All matches to this query

| Score | Mr(calc)  | Delta   | Sequence                     |
|-------|-----------|---------|------------------------------|
| 10.4  | 1234.5111 | 0.0817  | <a href="#">YMFVSCADSR</a>   |
| 6.6   | 1234.6670 | -0.0742 | <a href="#">VAIQYGTGAISR</a> |
| 6.3   | 1234.5441 | 0.0487  | <a href="#">FFVFACSDSR</a>   |
| 6.3   | 1234.5111 | 0.0817  | <a href="#">FMVFACSDSR</a>   |
| 5.8   | 1234.6459 | -0.0530 | <a href="#">VPWGLAGGEPPR</a> |
| 5.5   | 1234.5111 | 0.0817  | <a href="#">YMFVACSDSR</a>   |
| 5.3   | 1234.6050 | -0.0121 | <a href="#">IMVGLPSMESR</a>  |
| 5.2   | 1234.6054 | -0.0126 | <a href="#">ASNEGVRPYSR</a>  |
| 5.1   | 1234.6016 | -0.0088 | <a href="#">FPDQLIMESR</a>   |
| 5.0   | 1234.6306 | -0.0377 | <a href="#">IEDAERIEFSR</a>  |

Mascot: <http://www.matrixscience.com/>



# Mascot Search Results

## Peptide View **Spot no 23**

MS/MS Fragmentation of **DGAPDSFHFVEDWVR**

Found in **gi3345477** in **NCBI nr**, carbonic anhydrase [Oryza sativa]

Match to Query 27: 1775.892724 from(1776.900000,1+) intensity(0.0000) index(12)

Title: Label: G9, Spot\_Id: 228976, Peak\_List\_Id: 257844, MSMS Job\_Run\_Id: 24939, Comment:

Data file ppw\_G9\_138985152400.txt

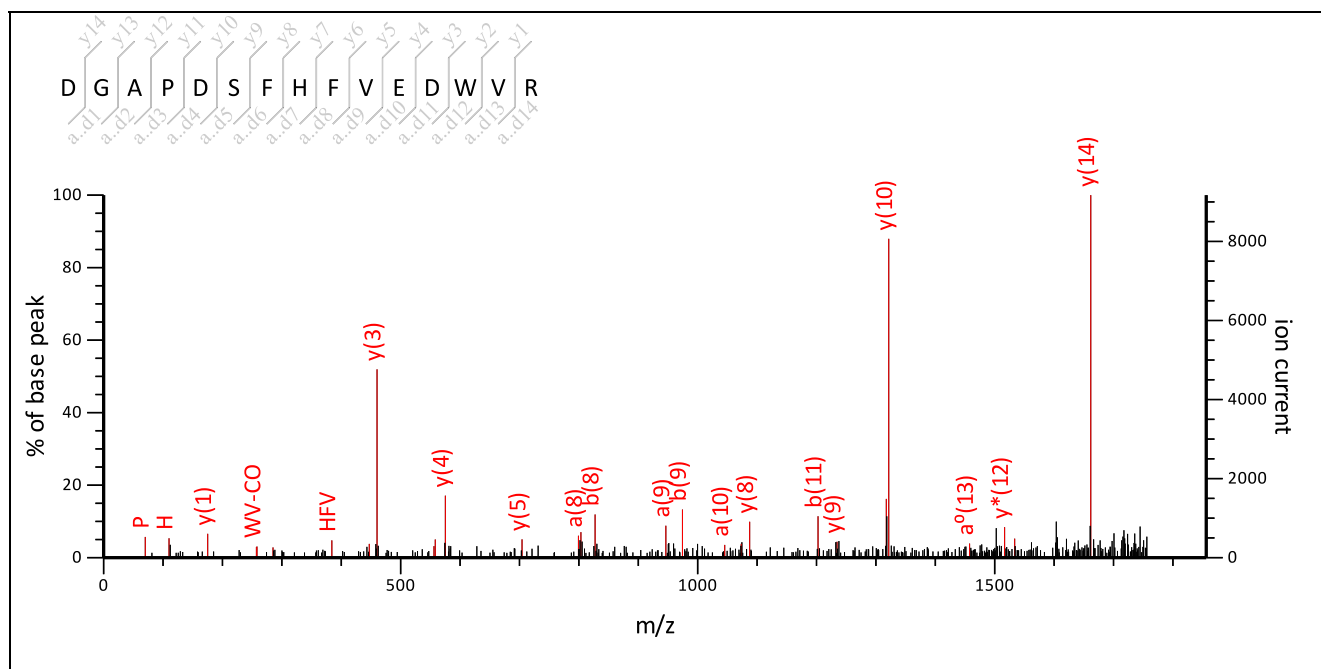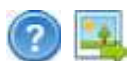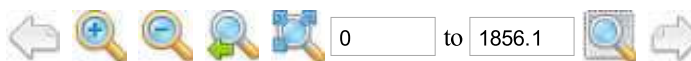

0 to 1856.1

Label all possible matches  Label matches used for scoring

**Monoisotopic mass of neutral peptide Mr(calc):** 1775.7904

**Fixed modifications:** Carbamidomethyl (C) (apply to specified residues or termini only)

**Ions Score:** 60 **Expect:** 0.0023

**Matches:** 36/228 fragment ions using 51 most intense peaks ([help](#))

| #  | Immon.   | a         | a <sup>0</sup> | b         | b <sup>0</sup> | d         | Seq. | v         | w         | y         | y*        | y <sup>0</sup> | #  |
|----|----------|-----------|----------------|-----------|----------------|-----------|------|-----------|-----------|-----------|-----------|----------------|----|
| 1  | 88.0393  | 88.0393   | 70.0287        | 116.0342  | 98.0237        | 44.0495   | D    |           |           |           |           |                | 15 |
| 2  | 30.0338  | 145.0608  | 127.0502       | 173.0557  | 155.0451       |           | G    |           |           | 1661.7707 | 1644.7441 | 1643.7601      | 14 |
| 3  | 44.0495  | 216.0979  | 198.0873       | 244.0928  | 226.0822       |           | A    | 1588.7179 |           | 1604.7492 | 1587.7227 | 1586.7387      | 13 |
| 4  | 70.0651  | 313.1506  | 295.1401       | 341.1456  | 323.1350       | 287.1350  | P    | 1491.6652 | 1490.6699 | 1533.7121 | 1516.6856 | 1515.7015      | 12 |
| 5  | 88.0393  | 428.1776  | 410.1670       | 456.1725  | 438.1619       | 384.1878  | D    | 1376.6382 | 1375.6430 | 1436.6593 | 1419.6328 | 1418.6488      | 11 |
| 6  | 60.0444  | 515.2096  | 497.1991       | 543.2045  | 525.1940       | 499.2147  | S    | 1289.6062 | 1288.6109 | 1321.6324 | 1304.6058 | 1303.6218      | 10 |
| 7  | 120.0808 | 662.2780  | 644.2675       | 690.2729  | 672.2624       |           | F    | 1142.5378 |           | 1234.6004 | 1217.5738 | 1216.5898      | 9  |
| 8  | 110.0713 | 799.3369  | 781.3264       | 827.3319  | 809.3213       |           | H    | 1005.4789 |           | 1087.5320 | 1070.5054 | 1069.5214      | 8  |
| 9  | 120.0808 | 946.4054  | 928.3948       | 974.4003  | 956.3897       |           | F    | 858.4104  |           | 950.4730  | 933.4465  | 932.4625       | 7  |
| 10 | 72.0808  | 1045.4738 | 1027.4632      | 1073.4687 | 1055.4581      | 1031.4581 | V    | 759.3420  | 772.3624  | 803.4046  | 786.3781  | 785.3941       | 6  |
| 11 | 102.0550 | 1174.5164 | 1156.5058      | 1202.5113 | 1184.5007      | 1116.5109 | E    | 630.2994  | 629.3042  | 704.3362  | 687.3097  | 686.3257       | 5  |

|    |          |           |                  |                  |           |           |   |          |          |                 |                 |          |   |
|----|----------|-----------|------------------|------------------|-----------|-----------|---|----------|----------|-----------------|-----------------|----------|---|
| 12 | 88.0393  | 1289.5433 | 1271.5327        | <b>1317.5382</b> | 1299.5277 | 1245.5535 | D | 515.2725 | 514.2772 | <b>575.2936</b> | <b>558.2671</b> | 557.2831 | 4 |
| 13 | 159.0917 | 1475.6226 | <b>1457.6121</b> | 1503.6175        | 1485.6070 |           | W | 329.1932 |          | <b>460.2667</b> | 443.2401        |          | 3 |
| 14 | 72.0808  | 1574.6910 | 1556.6805        | 1602.6859        | 1584.6754 | 1560.6754 | V | 230.1248 | 243.1452 | 274.1874        | <b>257.1608</b> |          | 2 |
| 15 | 129.1135 |           |                  |                  |           |           | R | 74.0237  | 73.0284  | <b>175.1190</b> | 158.0924        |          | 1 |

| Seq   | ya              | yb              | Seq    | ya       | yb              | Seq     | ya              | yb              |
|-------|-----------------|-----------------|--------|----------|-----------------|---------|-----------------|-----------------|
| GA    | 101.0709        | 129.0659        | GAP    | 198.1237 | 226.1186        | GAPD    | 313.1506        | 341.1456        |
| GAPDS | 400.1827        | 428.1776        | GAPDSF | 547.2511 | <b>575.2460</b> | GAPDSFH | 684.3100        | 712.3049        |
| AP    | 141.1022        | 169.0972        | APD    | 256.1292 | 284.1241        | APDS    | 343.1612        | 371.1561        |
| APDSF | 490.2296        | 518.2245        | APDSFH | 627.2885 | 655.2835        | PD      | 185.0921        | 213.0870        |
| PDS   | 272.1241        | 300.1190        | PDSF   | 419.1925 | <b>447.1874</b> | PDSFH   | <b>556.2514</b> | 584.2463        |
| DS    | <b>175.0713</b> | 203.0662        | DSF    | 322.1397 | 350.1347        | DSFH    | 459.1987        | 487.1936        |
| DSFH  | 606.2671        | 634.2620        | SF     | 207.1128 | 235.1077        | SFH     | 344.1717        | 372.1666        |
| SFHF  | 491.2401        | 519.2350        | SFHVF  | 590.3085 | 618.3035        | FH      | <b>257.1397</b> | <b>285.1346</b> |
| FHF   | 404.2081        | 432.2030        | FHFV   | 503.2765 | 531.2714        | FHFVE   | 632.3191        | 660.3140        |
| HF    | <b>257.1397</b> | <b>285.1346</b> | HFV    | 356.2081 | <b>384.2030</b> | HFVE    | 485.2507        | 513.2456        |
| HFVED | 600.2776        | 628.2726        | FV     | 219.1492 | 247.1441        | FVE     | 348.1918        | 376.1867        |
| FVED  | 463.2187        | 491.2136        | FVEDW  | 649.2980 | 677.2930        | VE      | 201.1234        | 229.1183        |
| VED   | 316.1503        | 344.1452        | VEDW   | 502.2296 | 530.2245        | VEDWV   | 601.2980        | 629.2930        |
| ED    | 217.0819        | 245.0768        | EDW    | 403.1612 | 431.1561        | EDWV    | 502.2296        | 530.2245        |
| DW    | 274.1186        | 302.1135        | DWV    | 373.1870 | 401.1819        | WV      | <b>258.1601</b> | 286.1550        |

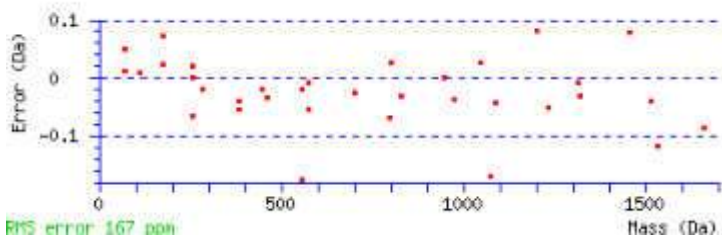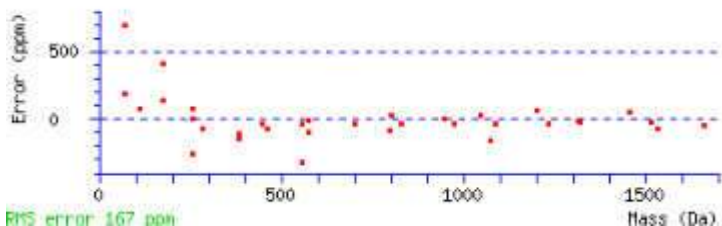

NCBI BLAST search of [DGAPDSFHFVEDWVR](#)  
 (Parameters: blastp, nr protein database, expect=20000, no filter, PAM30)  
 Other BLAST [web gateways](#)

All matches to this query

| Score | Mr(calc)  | Delta  | Sequence                          |
|-------|-----------|--------|-----------------------------------|
| 59.7  | 1775.7904 | 0.1023 | <a href="#">DGAPDSFHFVEDWVR</a>   |
| 15.4  | 1775.8916 | 0.0011 | <a href="#">EYYSFLKILCGVER</a>    |
| 14.8  | 1775.8074 | 0.0853 | <a href="#">DGFDPAPSSQNNITASR</a> |
| 13.8  | 1775.8818 | 0.0110 | <a href="#">DPKDMLVSWHFVVR</a>    |
| 12.5  | 1775.8115 | 0.0812 | <a href="#">DDPAGSTVPQADYVWR</a>  |
| 11.7  | 1775.7598 | 0.1329 | <a href="#">DRPSFEESPESDPER</a>   |

|      |           |        |                                    |
|------|-----------|--------|------------------------------------|
| 11.7 | 1775.8672 | 0.0256 | <a href="#">MLSARDLGHMHHISR</a>    |
| 10.3 | 1775.8479 | 0.0449 | <a href="#">DHLNYSVYIPDADVR</a>    |
| 9.7  | 1775.8876 | 0.0051 | <a href="#">DAVKLTGGPAYEVP MGR</a> |
| 9.7  | 1775.8108 | 0.0819 | <a href="#">DQDQMNVQSL SVEQR</a>   |

**Mascot:** <http://www.matrixscience.com/>

**MATRIX SCIENCE Mascot Search Results**

**Peptide View Spot no 23**

MS/MS Fragmentation of **VCPSVTMGLPEGEAFTVR**

Found in **gi|3345477** in **NCBI**nr, carbonic anhydrase [Oryza sativa]

Match to Query 31: 1965.031224 from(1966.038500,1+) intensity(0.0000) index(14)

Title: Label: G9, Spot\_Id: 228976, Peak\_List\_Id: 257845, MSMS Job\_Run\_Id: 24939, Comment:

Data file ppw\_G9\_138985152400.txt

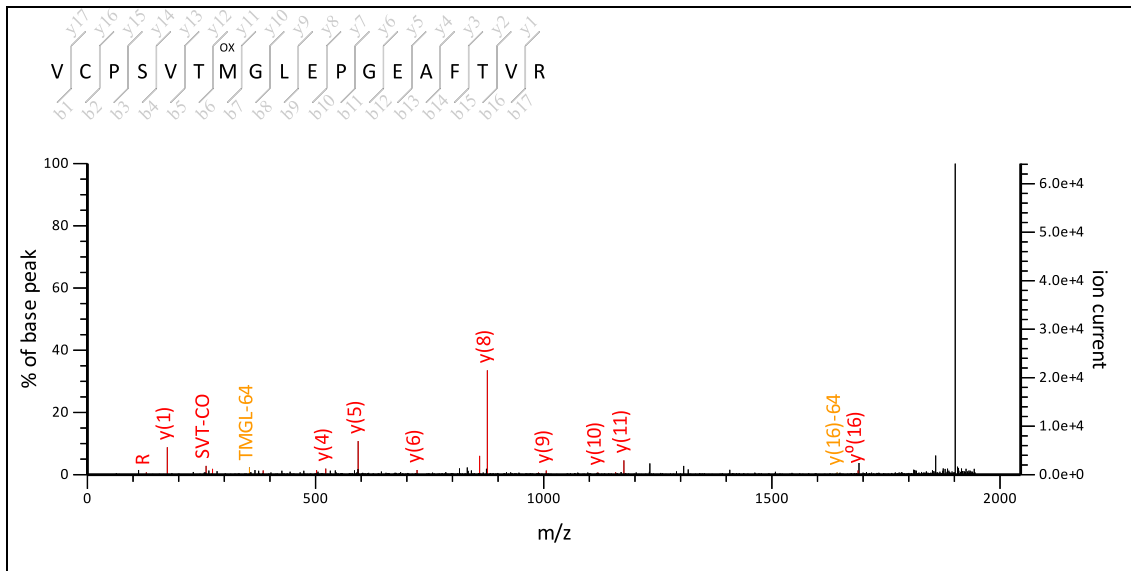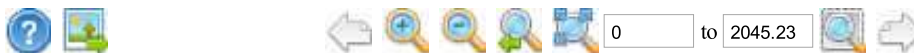

Label all possible matches  Label matches used for scoring

**Monoisotopic mass of neutral peptide Mr(calc):** 1964.9336  
**Fixed modifications:** Carbamidomethyl (C) (apply to specified residues or termini only)  
**Variable modifications:**  
 M7 : Oxidation (M), with neutral losses 63.9983(shown in table), 0.0000  
**Ions Score:** 57 **Expect:** 0.0041  
**Matches :** 23/452 fragment ions using 38 most intense peaks ([help](#))

| #  | Immon.   | a         | a <sup>0</sup> | b         | b <sup>0</sup> | d         | d'        | Seq. | v         | w         | w'        | y         | y*        | y <sup>0</sup> | #  |
|----|----------|-----------|----------------|-----------|----------------|-----------|-----------|------|-----------|-----------|-----------|-----------|-----------|----------------|----|
| 1  | 72.0808  | 72.0808   |                | 100.0757  |                | 44.0495   |           | V    |           |           |           |           |           |                | 18 |
| 2  | 133.0430 | 232.1114  |                | 260.1063  |                | 143.1179  |           | C    | 1697.8493 | 1696.8541 |           | 1802.8742 | 1785.8476 | 1784.8636      | 17 |
| 3  | 70.0651  | 329.1642  |                | 357.1591  |                | 303.1485  |           | P    | 1600.7966 | 1599.8013 |           | 1642.8435 | 1625.8170 | 1624.8329      | 16 |
| 4  | 60.0444  | 416.1962  | 398.1857       | 444.1911  | 426.1806       | 400.2013  |           | S    | 1513.7645 | 1512.7693 |           | 1545.7908 | 1528.7642 | 1527.7802      | 15 |
| 5  | 72.0808  | 515.2646  | 497.2541       | 543.2595  | 525.2490       | 501.2490  |           | V    | 1414.6961 | 1427.7165 |           | 1458.7587 | 1441.7322 | 1440.7482      | 14 |
| 6  | 74.0600  | 616.3123  | 598.3017       | 644.3072  | 626.2967       | 600.3174  | 602.2967  | T    | 1313.6484 | 1326.6688 | 1328.6481 | 1359.6903 | 1342.6638 | 1341.6797      | 13 |
| 7  | 56.0495  | 699.3494  | 681.3389       | 727.3443  | 709.3338       | 687.3494  |           | M    | 1230.6113 | 1229.6161 |           | 1258.6426 | 1241.6161 | 1240.6321      | 12 |
| 8  | 30.0338  | 756.3709  | 738.3603       | 784.3658  | 766.3552       |           |           | G    |           |           |           | 1175.6055 | 1158.5790 | 1157.5949      | 11 |
| 9  | 86.0964  | 869.4550  | 851.4444       | 897.4499  | 879.4393       | 827.4080  |           | L    | 1060.5058 | 1059.5106 |           | 1118.5841 | 1101.5575 | 1100.5735      | 10 |
| 10 | 102.0550 | 998.4975  | 980.4870       | 1026.4925 | 1008.4819      | 940.4921  |           | E    | 931.4632  | 930.4680  |           | 1005.5000 | 988.4734  | 987.4894       | 9  |
| 11 | 70.0651  | 1095.5503 | 1077.5397      | 1123.5452 | 1105.5347      | 1069.5347 |           | P    | 834.4104  | 833.4152  |           | 876.4574  | 859.4308  | 858.4468       | 8  |
| 12 | 30.0338  | 1152.5718 | 1134.5612      | 1180.5667 | 1162.5561      |           |           | G    |           |           |           | 779.4046  | 762.3781  | 761.3941       | 7  |
| 13 | 102.0550 | 1281.6144 | 1263.6038      | 1309.6093 | 1291.5987      | 1223.6089 |           | E    | 648.3464  | 647.3511  |           | 722.3832  | 705.3566  | 704.3726       | 6  |
| 14 | 44.0495  | 1352.6515 | 1334.6409      | 1380.6464 | 1362.6358      |           |           | A    | 577.3093  |           |           | 593.3406  | 576.3140  | 575.3300       | 5  |
| 15 | 120.0808 | 1499.7199 | 1481.7093      | 1527.7148 | 1509.7042      |           |           | F    | 430.2409  |           |           | 522.3035  | 505.2769  | 504.2929       | 4  |
| 16 | 74.0600  | 1600.7676 | 1582.7570      | 1628.7625 | 1610.7519      | 1584.7727 | 1586.7519 | T    | 329.1932  | 342.2136  | 344.1928  | 375.2350  | 358.2085  | 357.2245       | 3  |
| 17 | 72.0808  | 1699.8360 | 1681.8254      | 1727.8309 | 1709.8203      | 1685.8203 |           | V    | 230.1248  | 243.1452  |           | 274.1874  | 257.1608  |                | 2  |
| 18 | 129.1135 |           |                |           |                |           |           | R    | 74.0237   | 73.0284   |           | 175.1190  | 158.0924  |                | 1  |

| Seq     | ya       | yb       | Seq    | ya       | yb       | Seq     | ya       | yb       |
|---------|----------|----------|--------|----------|----------|---------|----------|----------|
| CP      | 230.0958 | 258.0907 | CPS    | 317.1278 | 345.1227 | CPSV    | 416.1962 | 444.1911 |
| CPSVT   | 517.2439 | 545.2388 | CPSVTM | 600.2810 | 628.2759 | CPSVTMG | 657.3025 | 685.2974 |
| PS      | 157.0972 | 185.0921 | PSV    | 256.1656 | 284.1605 | PSVT    | 357.2132 | 385.2082 |
| PSVTM   | 440.2504 | 468.2453 | PSVTMG | 497.2718 | 525.2667 | PSVTMGL | 610.3559 | 638.3508 |
| SV      | 159.1128 | 187.1077 | SVT    | 260.1605 | 288.1554 | SVTM    | 343.1976 | 371.1925 |
| SVTMG   | 400.2191 | 428.2140 | SVTMGL | 513.3031 | 541.2980 | SVTMGLE | 642.3457 | 670.3406 |
| VT      | 173.1285 | 201.1234 | VTM    | 256.1656 | 284.1605 | VTMG    | 313.1870 | 341.1819 |
| VTMGL   | 426.2711 | 454.2660 | VTMGLE | 555.3137 | 583.3086 | VTMGLEP | 652.3665 | 680.3614 |
| TM      | 157.0972 | 185.0921 | TMG    | 214.1186 | 242.1135 | TMGL    | 327.2027 | 355.1976 |
| TMGLE   | 456.2453 | 484.2402 | TMGLEP | 553.2980 | 581.2930 | TMGLEPG | 610.3195 | 638.3144 |
| MG      | 113.0709 | 141.0659 | MGL    | 226.1550 | 254.1499 | MGLE    | 355.1976 | 383.1925 |
| MGLEP   | 452.2504 | 480.2453 | MGLEPG | 509.2718 | 537.2667 | MGLEPGE | 638.3144 | 666.3093 |
| GL      | 143.1179 | 171.1128 | GLE    | 272.1605 | 300.1554 | GLEP    | 369.2132 | 397.2082 |
| GLEPG   | 426.2347 | 454.2296 | GLEPGE | 555.2773 | 583.2722 | GLEPGEA | 626.3144 | 654.3093 |
| LE      | 215.1390 | 243.1339 | LEP    | 312.1918 | 340.1867 | LEPG    | 369.2132 | 397.2082 |
| LEPGE   | 498.2558 | 526.2508 | LEPGEA | 569.2930 | 597.2879 | EP      | 199.1077 | 227.1026 |
| EPG     | 256.1292 | 284.1241 | EPGE   | 385.1718 | 413.1667 | EPGEA   | 456.2089 | 484.2038 |
| EPGEAF  | 603.2773 | 631.2722 | PG     | 127.0866 | 155.0815 | PGE     | 256.1292 | 284.1241 |
| PGEA    | 327.1663 | 355.1612 | PGEAF  | 474.2347 | 502.2296 | PGEAFT  | 575.2824 | 603.2773 |
| PGEAFTV | 674.3508 | 702.3457 | GE     | 159.0764 | 187.0713 | GEA     | 230.1135 | 258.1084 |
| GEAF    | 377.1819 | 405.1769 | GEAFT  | 478.2296 | 506.2245 | GEAFTV  | 577.2980 | 605.2930 |
| EA      | 173.0921 | 201.0870 | EAF    | 320.1605 | 348.1554 | EAFT    | 421.2082 | 449.2031 |
| EAFV    | 520.2766 | 548.2715 | AF     | 191.1179 | 219.1128 | AFT     | 292.1656 | 320.1605 |
| AFTV    | 391.2340 | 419.2289 | FT     | 221.1285 | 249.1234 | FTV     | 320.1969 | 348.1918 |
| TV      | 173.1285 | 201.1234 |        |          |          |         |          |          |

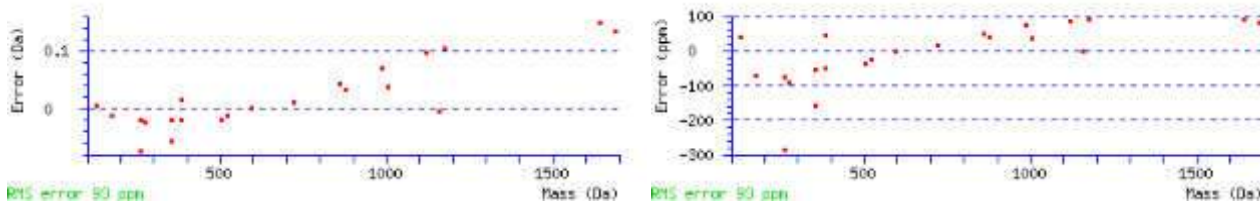

NCBI BLAST search of [VCPSVTMGLEPGEAFTVR](#)

(Parameters: blastp, nr protein database, expect=20000, no filter, PAM30)

Other BLAST [web gateways](#)

#### All matches to this query

| Score | Mr(calc)  | Delta   | Sequence                             |
|-------|-----------|---------|--------------------------------------|
| 56.7  | 1964.9336 | 0.0976  | <a href="#">VCPSVTMGLEPGEAFTVR</a>   |
| 17.1  | 1964.9778 | 0.0534  | <a href="#">LKGMGFEOQLHEAAIYR</a>    |
| 16.5  | 1965.0419 | -0.0106 | <a href="#">YSDLGSTSTLRYLDPTLK</a>   |
| 13.4  | 1964.9183 | 0.1129  | <a href="#">MOEPCEVSIDISVLSR</a>     |
| 12.2  | 1964.8997 | 0.1316  | <a href="#">VERSSMAVEIADSPSDEK</a>   |
| 11.8  | 1964.9448 | 0.0864  | <a href="#">VASSALGFGPOMAMQVAER</a>  |
| 11.8  | 1965.0030 | 0.0282  | <a href="#">MVGLEGFGLIDQIYGPTR</a>   |
| 11.6  | 1964.9473 | 0.0839  | <a href="#">EVRGSLDMLNEEVTTR</a>     |
| 11.1  | 1964.9990 | 0.0322  | <a href="#">ILGEGGQGTVYKGMMLVDGR</a> |
| 10.4  | 1964.9051 | 0.1262  | <a href="#">TYVSOYDLHHAEMTVR</a>     |

Mascot: <http://www.matrixscience.com/>

**MATRIX SCIENCE Mascot Search Results**

**Peptide View Spot no 23**

MS/MS Fragmentation of **VCPSVTMGLPEGEAFTVR**

Found in **gi3345477** in **NCBI**nr, carbonic anhydrase [Oryza sativa]

Match to Query 29: 1949.058124 from(1950.065400,1+) intensity(0.0000) index(13)

Title: Label: G9, Spot\_Id: 228976, Peak\_List\_Id: 257843, MSMS Job\_Run\_Id: 24939, Comment:

Data file ppw\_G9\_138985152400.txt

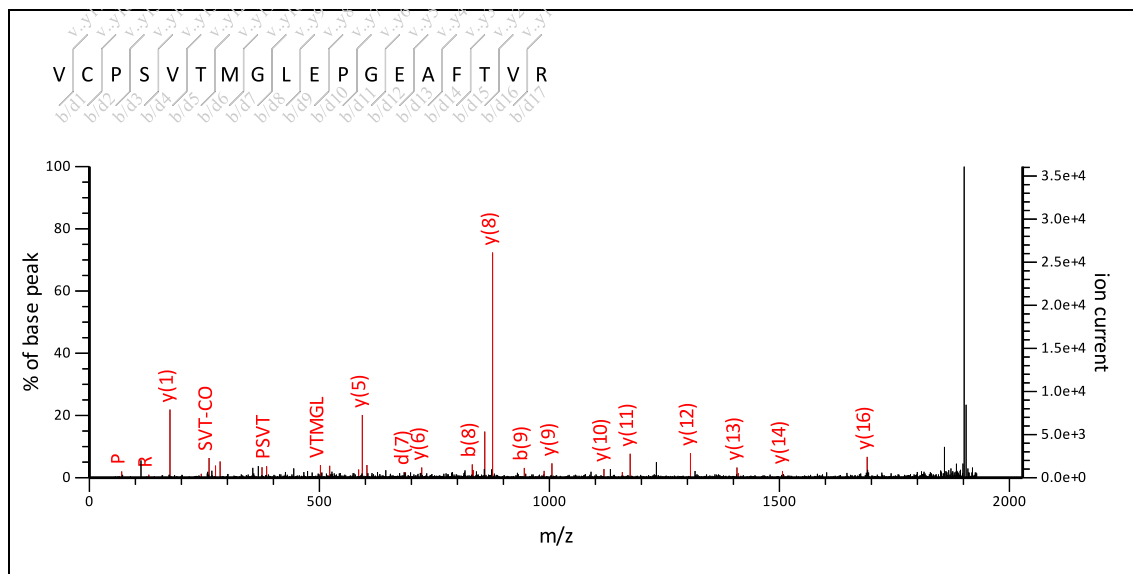

Navigation icons: ? [Image] [Image] [Image] [Image] [Image] 0 to 2028.71 [Image] [Image]

Label all possible matches  Label matches used for scoring

**Monoisotopic mass of neutral peptide Mr(calc):** 1948.9387

**Fixed modifications:** Carbamidomethyl (C) (apply to specified residues or termini only)

**Ions Score:** 101 **Expect:** 1.4e-07

**Matches:** 49/313 fragment ions using 57 most intense peaks ([help](#))

| #  | Immon.          | a         | a <sup>0</sup> | b               | b <sup>0</sup>   | d               | d'        | Seq. | v               | w               | w'        | y                | y*               | y <sup>0</sup>  | #  |
|----|-----------------|-----------|----------------|-----------------|------------------|-----------------|-----------|------|-----------------|-----------------|-----------|------------------|------------------|-----------------|----|
| 1  | 72.0808         | 72.0808   |                | 100.0757        |                  | 44.0495         |           | V    |                 |                 |           |                  |                  |                 | 18 |
| 2  | 133.0430        | 232.1114  |                | <b>260.1063</b> |                  | 143.1179        |           | C    | 1745.8527       | 1744.8575       |           | 1850.8775        | 1833.8510        | 1832.8670       | 17 |
| 3  | <b>70.0651</b>  | 329.1642  |                | 357.1591        |                  | 303.1485        |           | P    | 1648.7999       | 1647.8047       |           | <b>1690.8469</b> | 1673.8203        | 1672.8363       | 16 |
| 4  | 60.0444         | 416.1962  | 398.1857       | 444.1911        | 426.1806         | 400.2013        |           | S    | 1561.7679       | 1560.7727       |           | 1593.7941        | 1576.7676        | 1575.7836       | 15 |
| 5  | 72.0808         | 515.2646  | 497.2541       | 543.2595        | 525.2490         | 501.2490        |           | V    | 1462.6995       | 1475.7199       |           | <b>1506.7621</b> | 1489.7355        | 1488.7515       | 14 |
| 6  | 74.0600         | 616.3123  | 598.3017       | 644.3072        | 626.2967         | 600.3174        | 602.2967  | T    | 1361.6518       | 1374.6722       | 1376.6515 | <b>1407.6937</b> | 1390.6671        | 1389.6831       | 13 |
| 7  | 104.0528        | 747.3528  | 729.3422       | 775.3477        | 757.3371         | <b>687.3494</b> |           | M    | 1230.6113       | 1229.6161       |           | <b>1306.6460</b> | 1289.6195        | 1288.6354       | 12 |
| 8  | 30.0338         | 804.3743  | 786.3637       | <b>832.3692</b> | 814.3586         |                 |           | G    |                 |                 |           | <b>1175.6055</b> | <b>1158.5790</b> | 1157.5950       | 11 |
| 9  | 86.0964         | 917.4583  | 899.4478       | <b>945.4532</b> | 927.4427         | 875.4114        |           | L    | 1060.5058       | 1059.5106       |           | <b>1118.5841</b> | 1101.5575        | 1100.5735       | 10 |
| 10 | 102.0550        | 1046.5009 | 1028.4904      | 1074.4958       | 1056.4853        | <b>988.4954</b> |           | E    | 931.4632        | 930.4680        |           | <b>1005.5000</b> | <b>988.4734</b>  | <b>987.4894</b> | 9  |
| 11 | <b>70.0651</b>  | 1143.5537 | 1125.5431      | 1171.5486       | 1153.5380        | 1117.5380       |           | P    | <b>834.4104</b> | 833.4152        |           | <b>876.4574</b>  | <b>859.4308</b>  | 858.4468        | 8  |
| 12 | 30.0338         | 1200.5751 | 1182.5646      | 1228.5701       | 1210.5595        |                 |           | G    |                 |                 |           | 779.4046         | 762.3781         | 761.3941        | 7  |
| 13 | 102.0550        | 1329.6177 | 1311.6072      | 1357.6127       | 1339.6021        | 1271.6123       |           | E    | 648.3464        | 647.3511        |           | <b>722.3832</b>  | 705.3566         | 704.3726        | 6  |
| 14 | 44.0495         | 1400.6549 | 1382.6443      | 1428.6498       | <b>1410.6392</b> |                 |           | A    | 577.3093        |                 |           | <b>593.3406</b>  | 576.3140         | 575.3300        | 5  |
| 15 | 120.0808        | 1547.7233 | 1529.7127      | 1575.7182       | 1557.7076        |                 |           | F    | 430.2409        |                 |           | <b>522.3035</b>  | 505.2769         | 504.2929        | 4  |
| 16 | 74.0600         | 1648.7709 | 1630.7604      | 1676.7659       | 1658.7553        | 1632.7760       | 1634.7553 | T    | 329.1932        | 342.2136        | 344.1928  | <b>375.2350</b>  | 358.2085         | 357.2245        | 3  |
| 17 | 72.0808         | 1747.8394 | 1729.8288      | 1775.8343       | 1757.8237        | 1733.8237       |           | V    | 230.1248        | <b>243.1452</b> |           | <b>274.1874</b>  | 257.1608         |                 | 2  |
| 18 | <b>129.1135</b> |           |                |                 |                  |                 |           | R    | 74.0237         | 73.0284         |           | <b>175.1190</b>  | 158.0924         |                 | 1  |



| Seq     | ya       | yb       | Seq     | ya       | yb       | Seq    | ya       | yb       |
|---------|----------|----------|---------|----------|----------|--------|----------|----------|
| CP      | 230.0958 | 258.0907 | CPS     | 317.1278 | 345.1227 | CPSV   | 416.1962 | 444.1911 |
| CPSVT   | 517.2439 | 545.2388 | CPSVTM  | 648.2844 | 676.2793 | PS     | 157.0972 | 185.0921 |
| PSV     | 256.1656 | 284.1605 | PSVT    | 357.2132 | 385.2082 | PSVTM  | 488.2537 | 516.2486 |
| PSVTMG  | 545.2752 | 573.2701 | PSVTMGL | 658.3593 | 686.3542 | SV     | 159.1128 | 187.1077 |
| SVT     | 260.1605 | 288.1554 | SVTM    | 391.2010 | 419.1959 | SVTMG  | 448.2224 | 476.2173 |
| SVTMGL  | 561.3065 | 589.3014 | SVTMGLE | 690.3491 | 718.3440 | VT     | 173.1285 | 201.1234 |
| VTM     | 304.1689 | 332.1639 | VTMG    | 361.1904 | 389.1853 | VTMGL  | 474.2745 | 502.2694 |
| VTMGLE  | 603.3171 | 631.3120 | TM      | 205.1005 | 233.0954 | TMG    | 262.1220 | 290.1169 |
| TMGL    | 375.2061 | 403.2010 | TMGLE   | 504.2486 | 532.2436 | TMGLEP | 601.3014 | 629.2963 |
| TMGLEPG | 658.3229 | 686.3178 | MG      | 161.0743 | 189.0692 | MGL    | 274.1584 | 302.1533 |
| MGLE    | 403.2010 | 431.1959 | MGLEP   | 500.2537 | 528.2486 | MGLEPG | 557.2752 | 585.2701 |
| MGLEPGE | 686.3178 | 714.3127 | GL      | 143.1179 | 171.1128 | GLE    | 272.1605 | 300.1554 |
| GLEP    | 369.2132 | 397.2082 | GLEPG   | 426.2347 | 454.2296 | GLEPGE | 555.2773 | 583.2722 |
| GLEPGEA | 626.3144 | 654.3093 | LE      | 215.1390 | 243.1339 | LEP    | 312.1918 | 340.1867 |
| LEPG    | 369.2132 | 397.2082 | LEPGE   | 498.2558 | 526.2508 | LEPGEA | 569.2930 | 597.2879 |
| EP      | 199.1077 | 227.1026 | EPG     | 256.1292 | 284.1241 | EPGE   | 385.1718 | 413.1667 |
| EPGEA   | 456.2089 | 484.2038 | EPGEAF  | 603.2773 | 631.2722 | PG     | 127.0866 | 155.0815 |
| PGE     | 256.1292 | 284.1241 | PGEA    | 327.1663 | 355.1612 | PGEAF  | 474.2347 | 502.2296 |
| PGEAFT  | 575.2824 | 603.2773 | PGEAFTV | 674.3508 | 702.3457 | GE     | 159.0764 | 187.0713 |
| GEA     | 230.1135 | 258.1084 | GEAF    | 377.1819 | 405.1769 | GEAFT  | 478.2296 | 506.2245 |
| GEAFTV  | 577.2980 | 605.2930 | EA      | 173.0921 | 201.0870 | EAF    | 320.1605 | 348.1554 |
| EAF     | 421.2082 | 449.2031 | EAF     | 520.2766 | 548.2715 | AF     | 191.1179 | 219.1128 |
| AFT     | 292.1656 | 320.1605 | AFTV    | 391.2340 | 419.2289 | FT     | 221.1285 | 249.1234 |
| FTV     | 320.1969 | 348.1918 | TV      | 173.1285 | 201.1234 |        |          |          |

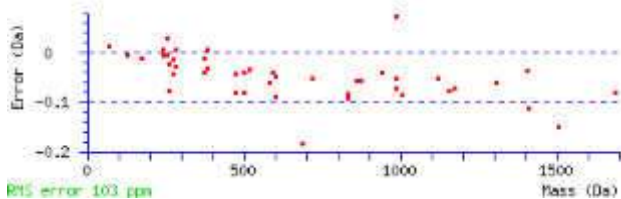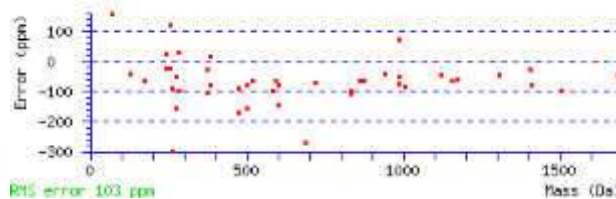

NCBI BLAST search of [VCPSVTMGLEPGEAFTVR](#)  
 (Parameters: blastp, nr protein database, expect=20000, no filter, PAM30)  
 Other BLAST [web gateways](#)

All matches to this query

| Score | Mr(calc)  | Delta  | Sequence                           |
|-------|-----------|--------|------------------------------------|
| 101.5 | 1948.9387 | 0.1194 | <a href="#">VCPSVTMGLEPGEAFTVR</a> |
| 13.9  | 1949.0155 | 0.0427 | <a href="#">AMAVAVCEIVWLISFLO</a>  |
| 12.3  | 1948.8684 | 0.1897 | <a href="#">DGSDADESVEVOVTMPVR</a> |
| 11.8  | 1948.9928 | 0.0653 | <a href="#">CVGSAEDLIDFVISVLGR</a> |
| 11.2  | 1949.0027 | 0.0554 | <a href="#">ITKTSIMLGLGESDDELK</a> |
| 10.2  | 1949.0081 | 0.0501 | <a href="#">LLGEFAELCGPFAGVLTR</a> |
| 9.1   | 1948.9564 | 0.1017 | <a href="#">PTLTKLYSMEEAATHNK</a>  |
| 9.0   | 1948.9061 | 0.1520 | <a href="#">SRSDSHCDEIIGFVTAR</a>  |
| 8.7   | 1948.9829 | 0.0752 | <a href="#">LKGMGFEQSLHEAAIYR</a>  |
| 8.7   | 1948.9234 | 0.1347 | <a href="#">MOEPCEVSIDISVLSLR</a>  |

Mascot: <http://www.matrixscience.com/>



# Mascot Search Results

## Peptide View **Spot no 24**

### MS/MS Fragmentation of **EFPGQVLR**

Found in **gi|115470529** in **NCBI**nr, Os07g0141400 [Oryza sativa Japonica Group]

Match to Query 9: 944.618394 from(945.625670,1+) intensity(0.0000) index(2)

Title: Label: B12, Spot\_Id: 216654, Peak\_List\_Id: 221696, MSMS Job\_Run\_Id: 21388, Comment:

Data file C:\Documents and Settings\Administrator\Desktop\farah BHU\Cotton leaves\RAJESH\12-1-13 raj\ppw\_B12\_136117695600.txt

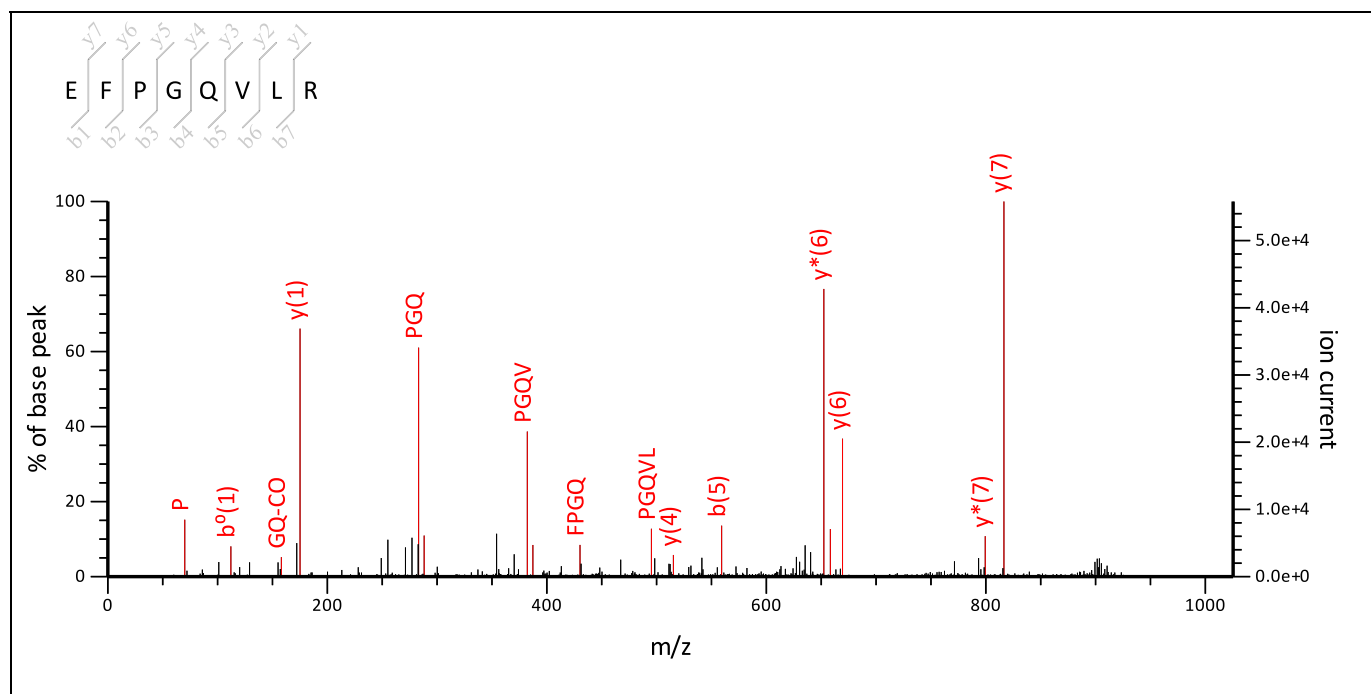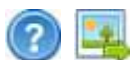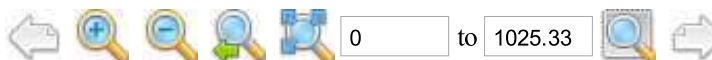

Label all possible matches  Label matches used for scoring

**Monoisotopic mass of neutral peptide Mr(calc):** 944.5080

**Fixed modifications:** Carbamidomethyl (C) (apply to specified residues or termini only)

**Ions Score:** 46 **Expect:** 0.22

**Matches :** 20/102 fragment ions using 27 most intense peaks ([help](#))

| # | Immon.   | a        | a*       | a <sup>0</sup> | b        | b*       | b <sup>0</sup> | d        | Seq. | v        | w        | y        | y*       | # |
|---|----------|----------|----------|----------------|----------|----------|----------------|----------|------|----------|----------|----------|----------|---|
| 1 | 102.0550 | 102.0550 |          | 84.0444        | 130.0499 |          | 112.0393       | 44.0495  | E    |          |          |          |          | 8 |
| 2 | 120.0808 | 249.1234 |          | 231.1128       | 277.1183 |          | 259.1077       |          | F    | 724.4101 |          | 816.4727 | 799.4461 | 7 |
| 3 | 70.0651  | 346.1761 |          | 328.1656       | 374.1710 |          | 356.1605       | 320.1605 | P    | 627.3573 | 626.3620 | 669.4042 | 652.3777 | 6 |
| 4 | 30.0338  | 403.1976 |          | 385.1870       | 431.1925 |          | 413.1819       |          | G    |          |          | 572.3515 | 555.3249 | 5 |
| 5 | 101.0709 | 531.2562 | 514.2296 | 513.2456       | 559.2511 | 542.2245 | 541.2405       | 474.2347 | Q    | 442.2772 | 441.2820 | 515.3300 | 498.3035 | 4 |
| 6 | 72.0808  | 630.3246 | 613.2980 | 612.3140       | 658.3195 | 641.2930 | 640.3089       | 616.3089 | V    | 343.2088 | 356.2292 | 387.2714 | 370.2449 | 3 |
| 7 | 86.0964  | 743.4087 | 726.3821 | 725.3981       | 771.4036 | 754.3770 | 753.3930       | 701.3617 | L    | 230.1248 | 229.1295 | 288.2030 | 271.1765 | 2 |
| 8 | 129.1135 |          |          |                |          |          |                |          | R    | 74.0237  | 73.0284  | 175.1190 | 158.0924 | 1 |

| Seq | ya       | yb       | Seq | ya       | yb       | Seq  | ya       | yb       |
|-----|----------|----------|-----|----------|----------|------|----------|----------|
| FP  | 217.1335 | 245.1285 | FPG | 274.1550 | 302.1499 | FPGQ | 402.2136 | 430.2085 |

|              |          |          |               |          |          |              |          |          |
|--------------|----------|----------|---------------|----------|----------|--------------|----------|----------|
| <b>FPGQV</b> | 501.2820 | 529.2769 | <b>FPGQVL</b> | 614.3661 | 642.3610 | <b>PG</b>    | 127.0866 | 155.0815 |
| <b>PGQ</b>   | 255.1452 | 283.1401 | <b>PGQV</b>   | 354.2136 | 382.2085 | <b>PGQVL</b> | 467.2976 | 495.2926 |
| <b>GQ</b>    | 158.0924 | 186.0873 | <b>GQV</b>    | 257.1608 | 285.1557 | <b>GQVL</b>  | 370.2449 | 398.2398 |
| <b>QV</b>    | 200.1394 | 228.1343 | <b>QVL</b>    | 313.2234 | 341.2183 | <b>VL</b>    | 185.1648 | 213.1598 |

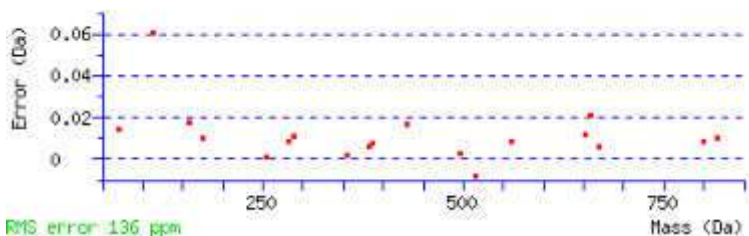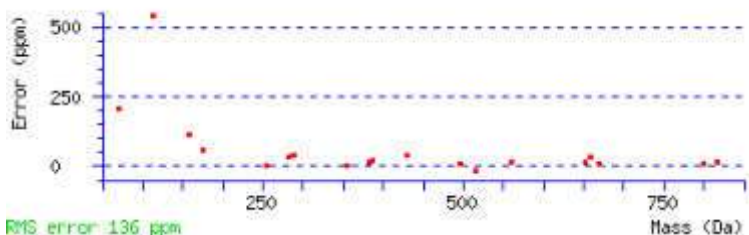

NCBI **BLAST** search of [EFPGQVLR](#)

(Parameters: blastp, nr protein database, expect=20000, no filter, PAM30)

Other BLAST [web gateways](#)

#### All matches to this query

| Score | Mr(calc) | Delta   | Sequence                   |
|-------|----------|---------|----------------------------|
| 45.8  | 944.5080 | 0.1104  | <a href="#">EFPGQVLR</a>   |
| 26.7  | 944.5114 | 0.1070  | <a href="#">MTGVGPVLR</a>  |
| 25.8  | 944.4862 | 0.1322  | <a href="#">EMQRPLR</a>    |
| 25.2  | 943.4611 | 1.1573  | <a href="#">QGPLADSEK</a>  |
| 25.2  | 945.5430 | -0.9246 | <a href="#">NVMAKVLR</a>   |
| 23.8  | 944.4749 | 0.1435  | <a href="#">MEAAPAALR</a>  |
| 22.6  | 944.4927 | 0.1257  | <a href="#">GEEDKVLR</a>   |
| 21.7  | 944.4563 | 0.1621  | <a href="#">EEQEAAIR</a>   |
| 21.5  | 943.4723 | 1.1461  | <a href="#">AGEQEAAALR</a> |
| 20.9  | 943.5239 | 1.0945  | <a href="#">AGFAVNPIR</a>  |

Mascot: <http://www.matrixscience.com/>


**Mascot Search Results**
**Peptide View Spot no 24**
MS/MS Fragmentation of **QYYSVTVLTR**Found in **gi|115470529** in **NCBI nr**, Os07g0141400 [Oryza sativa Japonica Group]

Match to Query 13: 1228.790724 from(1229.798000,1+) intensity(0.0000) index(4)

Title: Label: B12, Spot\_Id: 216654, Peak\_List\_Id: 221697, MSMS Job\_Run\_Id: 21388, Comment:

Data file C:\Documents and Settings\Administrator\Desktop\farah BHU\Cotton leaves\RAJESH\12-1-13 raj\ppw\_B12\_136117695600.txt

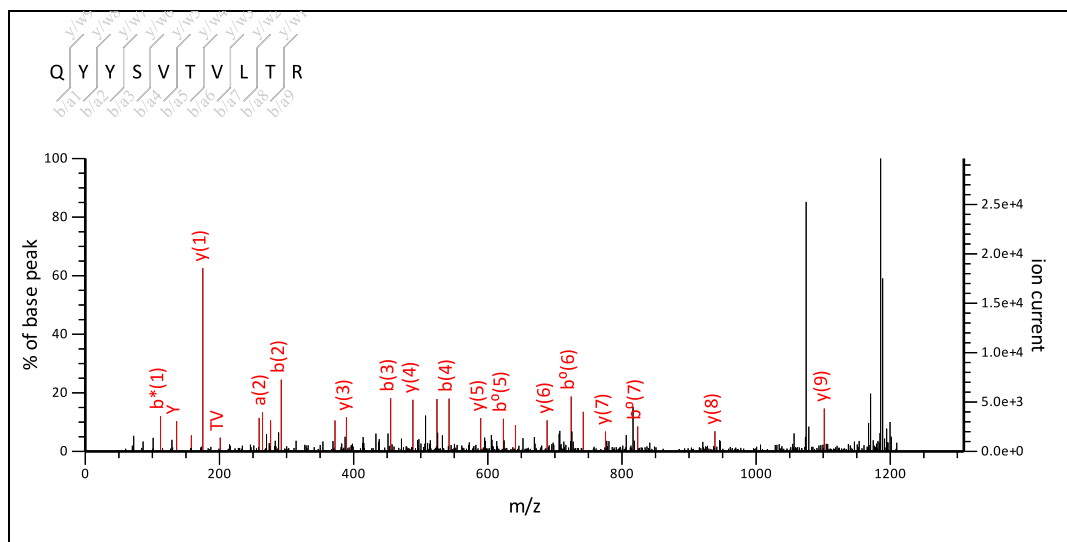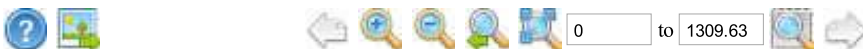Label all possible matches  Label matches used for scoring 

Monoisotopic mass of neutral peptide Mr(calc): 1228.6452

Fixed modifications: Carbamidomethyl (C) (apply to specified residues or termini only)

Ions Score: 67 Expect: 0.0012

Matches : 28/160 fragment ions using 36 most intense peaks ([help](#))

| #  | Immon.   | a         | a*        | a <sup>0</sup> | b         | b*        | b <sup>0</sup> | d         | d'        | Seq. | v        | w        | w'       | y         | y*        | y     |
|----|----------|-----------|-----------|----------------|-----------|-----------|----------------|-----------|-----------|------|----------|----------|----------|-----------|-----------|-------|
| 1  | 101.0709 | 101.0709  | 84.0444   |                | 129.0659  | 112.0393  |                | 44.0495   |           | Q    |          |          |          |           |           |       |
| 2  | 136.0757 | 264.1343  | 247.1077  |                | 292.1292  | 275.1026  |                |           |           | Y    | 993.5364 |          |          | 1101.5939 | 1084.5673 | 1083. |
| 3  | 136.0757 | 427.1976  | 410.1710  |                | 455.1925  | 438.1660  |                |           |           | Y    | 830.4730 |          |          | 938.5306  | 921.5040  | 920.  |
| 4  | 60.0444  | 514.2296  | 497.2031  | 496.2191       | 542.2245  | 525.1980  | 524.2140       | 498.2347  |           | S    | 743.4410 | 742.4458 |          | 775.4672  | 758.4407  | 757.  |
| 5  | 72.0808  | 613.2980  | 596.2715  | 595.2875       | 641.2930  | 624.2664  | 623.2824       | 599.2824  |           | V    | 644.3726 | 657.3930 |          | 688.4352  | 671.4087  | 670.  |
| 6  | 74.0600  | 714.3457  | 697.3192  | 696.3352       | 742.3406  | 725.3141  | 724.3301       | 698.3508  | 700.3301  | T    | 543.3249 | 556.3453 | 558.3246 | 589.3668  | 572.3402  | 571.  |
| 7  | 72.0808  | 813.4141  | 796.3876  | 795.4036       | 841.4090  | 824.3825  | 823.3985       | 799.3985  |           | V    | 444.2565 | 457.2769 |          | 488.3191  | 471.2926  | 470.  |
| 8  | 86.0964  | 926.4982  | 909.4716  | 908.4876       | 954.4931  | 937.4666  | 936.4825       | 884.4512  |           | L    | 331.1724 | 330.1772 |          | 389.2507  | 372.2241  | 371.  |
| 9  | 74.0600  | 1027.5459 | 1010.5193 | 1009.5353      | 1055.5408 | 1038.5142 | 1037.5302      | 1011.5510 | 1013.5302 | T    | 230.1248 | 243.1452 | 245.1244 | 276.1666  | 259.1401  | 258.  |
| 10 | 129.1135 |           |           |                |           |           |                |           |           | R    | 74.0237  | 73.0284  |          | 175.1190  | 158.0924  |       |

| Seq    | ya       | yb       | Seq    | ya       | yb       | Seq     | ya       | yb       |
|--------|----------|----------|--------|----------|----------|---------|----------|----------|
| YY     | 299.1390 | 327.1339 | YYS    | 386.1710 | 414.1660 | YYSV    | 485.2395 | 513.2344 |
| YYSVT  | 586.2871 | 614.2821 | YYSVTV | 685.3556 | 713.3505 | YS      | 223.1077 | 251.1026 |
| YSV    | 322.1761 | 350.1710 | YSVT   | 423.2238 | 451.2187 | YSVTV   | 522.2922 | 550.2871 |
| YSVTVL | 635.3763 | 663.3712 | SV     | 159.1128 | 187.1077 | SVT     | 260.1605 | 288.1554 |
| SVTV   | 359.2289 | 387.2238 | SVTVL  | 472.3130 | 500.3079 | SVTVLTV | 573.3606 | 601.3556 |
| VT     | 173.1285 | 201.1234 | VTV    | 272.1969 | 300.1918 | VTVL    | 385.2809 | 413.2758 |
| VTVLTV | 486.3286 | 514.3235 | TV     | 173.1285 | 201.1234 | TVL     | 286.2125 | 314.2074 |
| TVLTV  | 387.2602 | 415.2551 | VL     | 185.1648 | 213.1598 | VLT     | 286.2125 | 314.2074 |
| LT     | 187.1441 | 215.1390 |        |          |          |         |          |          |

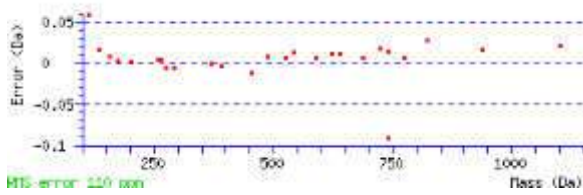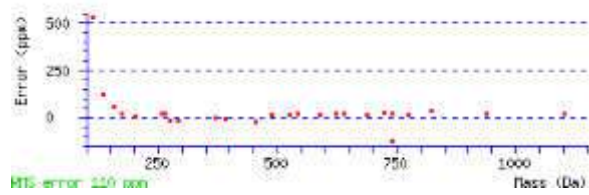

NCBI **BLAST** search of [QYYSVTVLTR](#)

(Parameters: blastp, nr protein database, expect=20000, no filter, PAM30)

Other BLAST [web gateways](#)

**All matches to this query**

| Score | Mr(calc)  | Delta   | Sequence                     |
|-------|-----------|---------|------------------------------|
| 66.7  | 1228.6452 | 0.1455  | <a href="#">QYYSVTVLTR</a>   |
| 21.7  | 1227.6572 | 1.1336  | <a href="#">ANPGSNVTVTLR</a> |
| 19.4  | 1229.6802 | -0.8895 | <a href="#">ISVQVIMSTR</a>   |
| 17.5  | 1227.6823 | 1.1085  | <a href="#">LNNEAVEALKK</a>  |
| 17.1  | 1227.6823 | 1.1084  | <a href="#">DIPQSISVTR</a>   |
| 16.9  | 1229.7092 | -0.9184 | <a href="#">RSVLDALSLTR</a>  |
| 16.8  | 1228.6564 | 0.1343  | <a href="#">SGNWPVSIITR</a>  |
| 15.3  | 1227.7187 | 1.0721  | <a href="#">VALEKLDAITR</a>  |
| 14.3  | 1228.7139 | 0.0768  | <a href="#">KGTIOITEALR</a>  |
| 14.0  | 1228.6160 | 0.1747  | <a href="#">SLVNOAEAONR</a>  |

Mascot: <http://www.matrixscience.com/>



# Mascot Search Results

## Peptide View **Spot no 24**

MS/MS Fragmentation of **KFVESAASSFSVA**Found in **gi|115470529** in **NCBI**nr, Os07g0141400 [Oryza sativa Japonica Group]

Match to Query 16: 1328.787024 from(1329.794300,1+) intensity(0.0000) index(5)

Title: Label: B12, Spot\_Id: 216654, Peak\_List\_Id: 221715, MSMS Job\_Run\_Id: 21388, Comment:

Data file C:\Documents and Settings\Administrator\Desktop\farah BHU\Cotton leaves\RAJESH\12-1-13 raj\ppw\_B12\_136117695600.txt

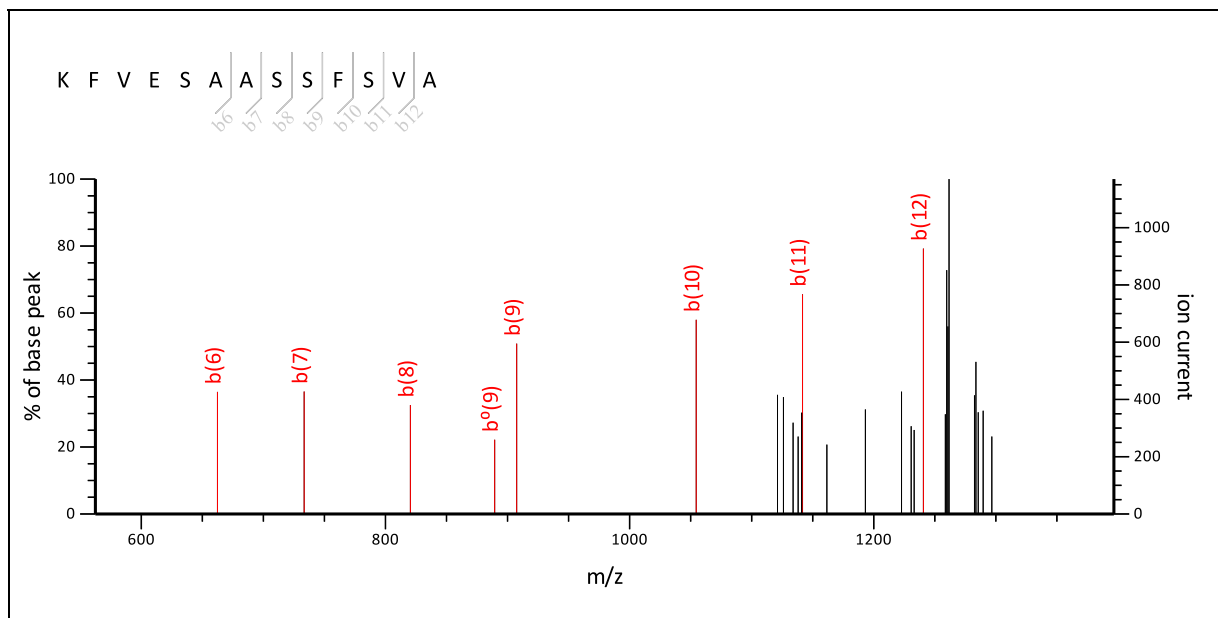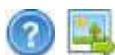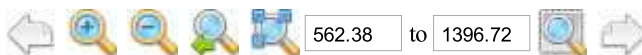Label all possible matches  Label matches used for scoring 

Monoisotopic mass of neutral peptide Mr(calc): 1328.6612

Fixed modifications: Carbamidomethyl (C) (apply to specified residues or termini only)

Ions Score: 53 Expect: 0.029

Matches : 9/219 fragment ions using 12 most intense peaks ([help](#))

| #  | Immon.   | a         | a*        | a <sup>0</sup> | b         | b*        | b <sup>0</sup> | d         | Seq. | v         | w         | y         | y <sup>0</sup> | #  |
|----|----------|-----------|-----------|----------------|-----------|-----------|----------------|-----------|------|-----------|-----------|-----------|----------------|----|
| 1  | 101.1073 | 101.1073  | 84.0808   |                | 129.1022  | 112.0757  |                | 44.0495   | K    |           |           |           |                | 13 |
| 2  | 120.0808 | 248.1757  | 231.1492  |                | 276.1707  | 259.1441  |                |           | F    | 1109.5109 |           | 1201.5735 | 1183.5630      | 12 |
| 3  | 72.0808  | 347.2442  | 330.2176  |                | 375.2391  | 358.2125  |                | 333.2285  | V    | 1010.4425 | 1023.4629 | 1054.5051 | 1036.4946      | 11 |
| 4  | 102.0550 | 476.2867  | 459.2602  | 458.2762       | 504.2817  | 487.2551  | 486.2711       | 418.2813  | E    | 881.3999  | 880.4047  | 955.4367  | 937.4262       | 10 |
| 5  | 60.0444  | 563.3188  | 546.2922  | 545.3082       | 591.3137  | 574.2871  | 573.3031       | 547.3239  | S    | 794.3679  | 793.3727  | 826.3941  | 808.3836       | 9  |
| 6  | 44.0495  | 634.3559  | 617.3293  | 616.3453       | 662.3508  | 645.3243  | 644.3402       |           | A    | 723.3308  |           | 739.3621  | 721.3515       | 8  |
| 7  | 44.0495  | 705.3930  | 688.3665  | 687.3824       | 733.3879  | 716.3614  | 715.3774       |           | A    | 652.2937  |           | 668.3250  | 650.3144       | 7  |
| 8  | 60.0444  | 792.4250  | 775.3985  | 774.4145       | 820.4199  | 803.3934  | 802.4094       | 776.4301  | S    | 565.2617  | 564.2664  | 597.2879  | 579.2773       | 6  |
| 9  | 60.0444  | 879.4571  | 862.4305  | 861.4465       | 907.4520  | 890.4254  | 889.4414       | 863.4621  | S    | 478.2296  | 477.2344  | 510.2558  | 492.2453       | 5  |
| 10 | 120.0808 | 1026.5255 | 1009.4989 | 1008.5149      | 1054.5204 | 1037.4938 | 1036.5098      |           | F    | 331.1612  |           | 423.2238  | 405.2132       | 4  |
| 11 | 60.0444  | 1113.5575 | 1096.5310 | 1095.5469      | 1141.5524 | 1124.5259 | 1123.5418      | 1097.5626 | S    | 244.1292  | 243.1339  | 276.1554  | 258.1448       | 3  |
| 12 | 72.0808  | 1212.6259 | 1195.5994 | 1194.6153      | 1240.6208 | 1223.5943 | 1222.6103      | 1198.6103 | V    | 145.0608  | 158.0812  | 189.1234  |                | 2  |
| 13 | 44.0495  |           |           |                |           |           |                |           | A    | 74.0237   | 73.0284   | 90.0550   |                | 1  |

| Seq | ya       | yb       | Seq | ya       | yb       | Seq  | ya       | yb       |
|-----|----------|----------|-----|----------|----------|------|----------|----------|
| FV  | 219.1492 | 247.1441 | FVE | 348.1918 | 376.1867 | FVES | 435.2238 | 463.2187 |

|                       |          |          |                        |          |          |                         |          |          |
|-----------------------|----------|----------|------------------------|----------|----------|-------------------------|----------|----------|
| <a href="#">FVESA</a> | 506.2609 | 534.2558 | <a href="#">FVESAA</a> | 577.2980 | 605.2930 | <a href="#">FVESAAS</a> | 664.3301 | 692.3250 |
| <a href="#">VE</a>    | 201.1234 | 229.1183 | <a href="#">VES</a>    | 288.1554 | 316.1503 | <a href="#">VESA</a>    | 359.1925 | 387.1874 |
| <a href="#">VESAA</a> | 430.2296 | 458.2245 | <a href="#">VESAAS</a> | 517.2617 | 545.2566 | <a href="#">VESAASS</a> | 604.2937 | 632.2886 |
| <a href="#">ES</a>    | 189.0870 | 217.0819 | <a href="#">ESA</a>    | 260.1241 | 288.1190 | <a href="#">ESAA</a>    | 331.1612 | 359.1561 |
| <a href="#">ESAAS</a> | 418.1932 | 446.1882 | <a href="#">ESAASS</a> | 505.2253 | 533.2202 | <a href="#">ESAASSF</a> | 652.2937 | 680.2886 |
| <a href="#">SA</a>    | 131.0815 | 159.0764 | <a href="#">SAA</a>    | 202.1186 | 230.1135 | <a href="#">SAAS</a>    | 289.1506 | 317.1456 |
| <a href="#">SAASS</a> | 376.1827 | 404.1776 | <a href="#">SAASSF</a> | 523.2511 | 551.2460 | <a href="#">SAASSFS</a> | 610.2831 | 638.2780 |
| <a href="#">AA</a>    | 115.0866 | 143.0815 | <a href="#">AAS</a>    | 202.1186 | 230.1135 | <a href="#">AASS</a>    | 289.1506 | 317.1456 |
| <a href="#">AASSF</a> | 436.2191 | 464.2140 | <a href="#">AASSFS</a> | 523.2511 | 551.2460 | <a href="#">AASSFSV</a> | 622.3195 | 650.3144 |
| <a href="#">AS</a>    | 131.0815 | 159.0764 | <a href="#">ASS</a>    | 218.1135 | 246.1084 | <a href="#">ASSF</a>    | 365.1819 | 393.1769 |
| <a href="#">ASSFS</a> | 452.2140 | 480.2089 | <a href="#">ASSFSV</a> | 551.2824 | 579.2773 | <a href="#">SS</a>      | 147.0764 | 175.0713 |
| <a href="#">SSF</a>   | 294.1448 | 322.1397 | <a href="#">SSFS</a>   | 381.1769 | 409.1718 | <a href="#">SSFSV</a>   | 480.2453 | 508.2402 |
| <a href="#">SF</a>    | 207.1128 | 235.1077 | <a href="#">SFS</a>    | 294.1448 | 322.1397 | <a href="#">SFSV</a>    | 393.2132 | 421.2082 |
| <a href="#">FS</a>    | 207.1128 | 235.1077 | <a href="#">FSV</a>    | 306.1812 | 334.1761 | <a href="#">SV</a>      | 159.1128 | 187.1077 |

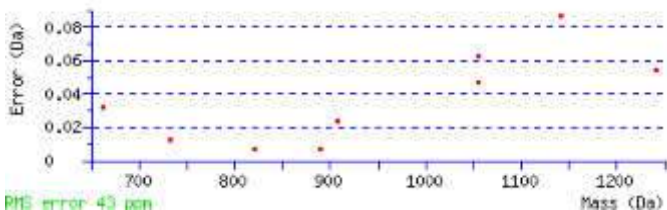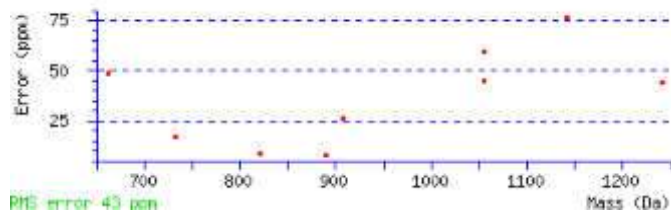

NCBI **BLAST** search of [KFVESAASSFSVA](#)

(Parameters: blastp, nr protein database, expect=20000, no filter, PAM30)

Other BLAST [web gateways](#)

#### All matches to this query

| Score | Mr(calc)  | Delta   | Sequence                       |
|-------|-----------|---------|--------------------------------|
| 52.9  | 1328.6612 | 0.1258  | <a href="#">KFVESAASSFSVA</a>  |
| 28.7  | 1328.6183 | 0.1687  | <a href="#">TARMDWSSFTK</a>    |
| 28.7  | 1328.5997 | 0.1873  | <a href="#">TNASSWNSSF TK</a>  |
| 25.5  | 1327.6806 | 1.1065  | <a href="#">NSISIMASSEFKK</a>  |
| 24.5  | 1328.6096 | 0.1774  | <a href="#">TSSFSLQESTDK</a>   |
| 20.6  | 1328.6282 | 0.1588  | <a href="#">ASALNYISSMEK</a>   |
| 19.7  | 1327.6289 | 1.1581  | <a href="#">STLSSEQSSMKK</a>   |
| 19.6  | 1329.7517 | -0.9647 | <a href="#">AAAISSAFARIR</a>   |
| 16.8  | 1327.6554 | 1.1316  | <a href="#">AHNVSTGEAMA IK</a> |
| 16.4  | 1328.7048 | 0.0822  | <a href="#">TSSESRLSPLPR</a>   |

Mascot: <http://www.matrixscience.com/>



**MATRIX SCIENCE Mascot Search Results**

**Peptide View Spot no 24**

MS/MS Fragmentation of **YEDNFDANSNVSIINPTTK**

Found in **gi|115470529** in **NCBI nr**, Os07g0141400 [Oryza sativa Japonica Group]

Match to Query 28: 2240.296424 from(2241.303700,1+) intensity(0.0000) index(10)

Title: Label: B12, Spot\_Id: 216654, Peak\_List\_Id: 221710, MSMS Job\_Run\_Id: 21388, Comment:

Data file C:\Documents and Settings\Administrator\Desktop\farah BHU\Cotton leaves\RAJESH\12-1-13 raj\ppw\_B12\_136117695600.txt

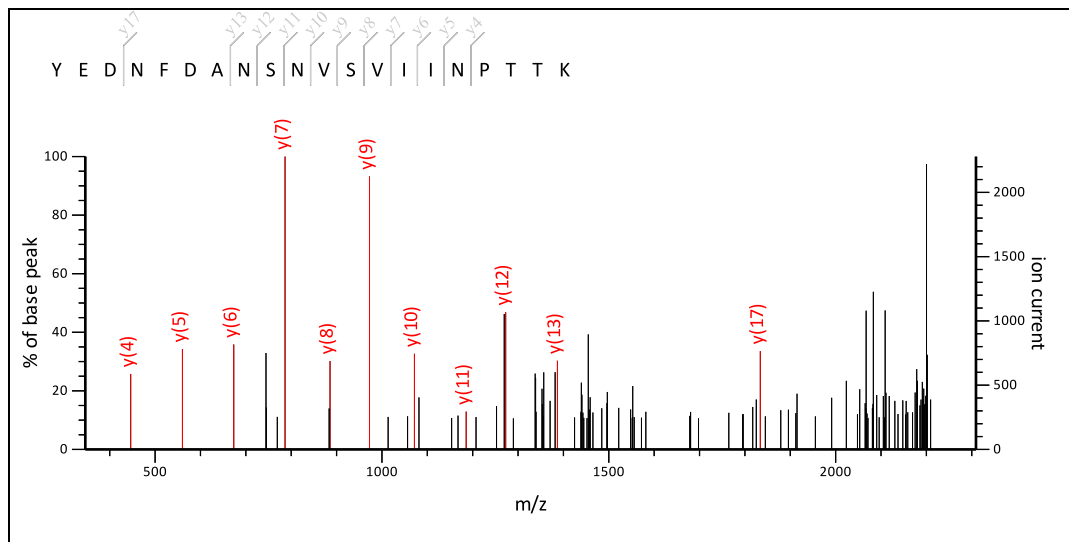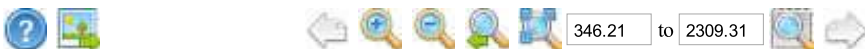

Label all possible matches  Label matches used for scoring

Monoisotopic mass of neutral peptide Mr(calc): 2240.0597

Fixed modifications: Carbamidomethyl (C) (apply to specified residues or termini only)

Ions Score: 77 Expect: 6.3e-05

Matches : 11/401 fragment ions using 18 most intense peaks [\(help\)](#)

| #  | Immon.   | a         | a*        | a <sup>0</sup> | b         | b*        | b <sup>0</sup> | d         | d'        | Seq. | v         | w         | w'       | y         | y*        |
|----|----------|-----------|-----------|----------------|-----------|-----------|----------------|-----------|-----------|------|-----------|-----------|----------|-----------|-----------|
| 1  | 136.0757 | 136.0757  |           |                | 164.0706  |           |                | 44.0495   |           | Y    |           |           |          |           |           |
| 2  | 102.0550 | 265.1183  |           | 247.1077       | 293.1132  |           | 275.1026       | 207.1128  |           | E    | 2003.9669 | 2002.9716 |          | 2078.0037 | 2060.9771 |
| 3  | 88.0393  | 380.1452  |           | 362.1347       | 408.1401  |           | 390.1296       | 336.1554  |           | D    | 1888.9399 | 1887.9447 |          | 1948.9611 | 1931.9345 |
| 4  | 87.0553  | 494.1882  | 477.1616  | 476.1776       | 522.1831  | 505.1565  | 504.1725       | 451.1823  |           | N    | 1774.8970 | 1773.9018 |          | 1833.9341 | 1816.9076 |
| 5  | 120.0808 | 641.2566  | 624.2300  | 623.2460       | 669.2515  | 652.2249  | 651.2409       |           |           | F    | 1627.8286 |           |          | 1719.8912 | 1702.8646 |
| 6  | 88.0393  | 756.2835  | 739.2570  | 738.2729       | 784.2784  | 767.2519  | 766.2679       | 712.2937  |           | D    | 1512.8016 | 1511.8064 |          | 1572.8228 | 1555.7962 |
| 7  | 44.0495  | 827.3206  | 810.2941  | 809.3101       | 855.3155  | 838.2890  | 837.3050       |           |           | A    | 1441.7645 |           |          | 1457.7958 | 1440.7693 |
| 8  | 87.0553  | 941.3636  | 924.3370  | 923.3530       | 969.3585  | 952.3319  | 951.3479       | 898.3577  |           | N    | 1327.7216 | 1326.7264 |          | 1386.7587 | 1369.7322 |
| 9  | 60.0444  | 1028.3956 | 1011.3690 | 1010.3850      | 1056.3905 | 1039.3639 | 1038.3799      | 1012.4007 |           | S    | 1240.6896 | 1239.6943 |          | 1272.7158 | 1255.6892 |
| 10 | 87.0553  | 1142.4385 | 1125.4120 | 1124.4279      | 1170.4334 | 1153.4069 | 1152.4229      | 1099.4327 |           | N    | 1126.6467 | 1125.6514 |          | 1185.6838 | 1168.6572 |
| 11 | 72.0808  | 1241.5069 | 1224.4804 | 1223.4964      | 1269.5018 | 1252.4753 | 1251.4913      | 1227.4913 |           | V    | 1027.5782 | 1040.5986 |          | 1071.6408 | 1054.6143 |
| 12 | 60.0444  | 1328.5389 | 1311.5124 | 1310.5284      | 1356.5339 | 1339.5073 | 1338.5233      | 1312.5440 |           | S    | 940.5462  | 939.5510  |          | 972.5724  | 955.5459  |
| 13 | 72.0808  | 1427.6074 | 1410.5808 | 1409.5968      | 1455.6023 | 1438.5757 | 1437.5917      | 1413.5917 |           | V    | 841.4778  | 854.4982  |          | 885.5404  | 868.5138  |
| 14 | 86.0964  | 1540.6914 | 1523.6649 | 1522.6809      | 1568.6863 | 1551.6598 | 1550.6758      | 1512.6601 | 1526.6758 | I    | 728.3937  | 741.4141  | 755.4298 | 786.4720  | 769.4454  |
| 15 | 86.0964  | 1653.7755 | 1636.7489 | 1635.7649      | 1681.7704 | 1664.7439 | 1663.7598      | 1625.7442 | 1639.7598 | I    | 615.3097  | 628.3301  | 642.3457 | 673.3879  | 656.3614  |
| 16 | 87.0553  | 1767.8184 | 1750.7919 | 1749.8079      | 1795.8133 | 1778.7868 | 1777.8028      | 1724.8126 |           | N    | 501.2667  | 500.2715  |          | 560.3039  | 543.2773  |
| 17 | 70.0651  | 1864.8712 | 1847.8446 | 1846.8606      | 1892.8661 | 1875.8395 | 1874.8555      | 1838.8555 |           | P    | 404.2140  | 403.2187  |          | 446.2609  | 429.2344  |
| 18 | 74.0600  | 1965.9189 | 1948.8923 | 1947.9083      | 1993.9138 | 1976.8872 | 1975.9032      | 1949.9239 | 1951.9032 | T    | 303.1663  | 316.1867  | 318.1660 | 349.2082  | 332.1816  |
| 19 | 74.0600  | 2066.9665 | 2049.9400 | 2048.9560      | 2094.9615 | 2077.9349 | 2076.9509      | 2050.9716 | 2052.9509 | T    | 202.1186  | 215.1390  | 217.1183 | 248.1605  | 231.1339  |
| 20 | 101.1073 |           |           |                |           |           |                |           |           | K    | 74.0237   | 73.0284   |          | 147.1128  | 130.0863  |

| Seq | ya       | yb       | Seq | ya       | yb       | Seq  | ya       | yb       |
|-----|----------|----------|-----|----------|----------|------|----------|----------|
| ED  | 217.0819 | 245.0768 | EDN | 331.1248 | 359.1197 | EDNF | 478.1932 | 506.1882 |

|                         |          |          |                         |          |          |                        |          |          |
|-------------------------|----------|----------|-------------------------|----------|----------|------------------------|----------|----------|
| <a href="#">EDNFD</a>   | 593.2202 | 621.2151 | <a href="#">EDNFDA</a>  | 664.2573 | 692.2522 | <a href="#">DN</a>     | 202.0822 | 230.0771 |
| <a href="#">DNF</a>     | 349.1506 | 377.1456 | <a href="#">DNFD</a>    | 464.1776 | 492.1725 | <a href="#">DNFDA</a>  | 535.2147 | 563.2096 |
| <a href="#">DNFDAN</a>  | 649.2576 | 677.2525 | <a href="#">NF</a>      | 234.1237 | 262.1186 | <a href="#">NFD</a>    | 349.1506 | 377.1456 |
| <a href="#">NFDA</a>    | 420.1878 | 448.1827 | <a href="#">NFDAN</a>   | 534.2307 | 562.2256 | <a href="#">NFDANS</a> | 621.2627 | 649.2576 |
| <a href="#">FD</a>      | 235.1077 | 263.1026 | <a href="#">FDA</a>     | 306.1448 | 334.1397 | <a href="#">FDAN</a>   | 420.1878 | 448.1827 |
| <a href="#">FDANS</a>   | 507.2198 | 535.2147 | <a href="#">FDANSN</a>  | 621.2627 | 649.2576 | <a href="#">DA</a>     | 159.0764 | 187.0713 |
| <a href="#">DAN</a>     | 273.1193 | 301.1143 | <a href="#">DANS</a>    | 360.1514 | 388.1463 | <a href="#">DANSN</a>  | 474.1943 | 502.1892 |
| <a href="#">DANSNV</a>  | 573.2627 | 601.2576 | <a href="#">DANSNVS</a> | 660.2947 | 688.2897 | <a href="#">AN</a>     | 158.0924 | 186.0873 |
| <a href="#">ANS</a>     | 245.1244 | 273.1193 | <a href="#">ANSN</a>    | 359.1674 | 387.1623 | <a href="#">ANSNV</a>  | 458.2358 | 486.2307 |
| <a href="#">ANSNVS</a>  | 545.2678 | 573.2627 | <a href="#">ANSNVSV</a> | 644.3362 | 672.3311 | <a href="#">NS</a>     | 174.0873 | 202.0822 |
| <a href="#">NSN</a>     | 288.1302 | 316.1252 | <a href="#">NSNV</a>    | 387.1987 | 415.1936 | <a href="#">NSNVS</a>  | 474.2307 | 502.2256 |
| <a href="#">NSNVSV</a>  | 573.2991 | 601.2940 | <a href="#">NSNVSVI</a> | 686.3832 | 714.3781 | <a href="#">SN</a>     | 174.0873 | 202.0822 |
| <a href="#">SNV</a>     | 273.1557 | 301.1506 | <a href="#">SNVS</a>    | 360.1878 | 388.1827 | <a href="#">SNVSV</a>  | 459.2562 | 487.2511 |
| <a href="#">SNVSVI</a>  | 572.3402 | 600.3352 | <a href="#">SNVSVII</a> | 685.4243 | 713.4192 | <a href="#">NV</a>     | 186.1237 | 214.1186 |
| <a href="#">NVS</a>     | 273.1557 | 301.1506 | <a href="#">NVSV</a>    | 372.2241 | 400.2191 | <a href="#">NVSVI</a>  | 485.3082 | 513.3031 |
| <a href="#">NVSVII</a>  | 598.3923 | 626.3872 | <a href="#">VS</a>      | 159.1128 | 187.1077 | <a href="#">VSV</a>    | 258.1812 | 286.1761 |
| <a href="#">VSVI</a>    | 371.2653 | 399.2602 | <a href="#">VSVII</a>   | 484.3493 | 512.3443 | <a href="#">VSVIIN</a> | 598.3923 | 626.3872 |
| <a href="#">VSVIINP</a> | 695.4450 | 723.4400 | <a href="#">SV</a>      | 159.1128 | 187.1077 | <a href="#">SVI</a>    | 272.1969 | 300.1918 |
| <a href="#">SVII</a>    | 385.2809 | 413.2758 | <a href="#">SVIIN</a>   | 499.3239 | 527.3188 | <a href="#">SVIINP</a> | 596.3766 | 624.3715 |
| <a href="#">SVIINPT</a> | 697.4243 | 725.4192 | <a href="#">VI</a>      | 185.1648 | 213.1598 | <a href="#">VII</a>    | 298.2489 | 326.2438 |
| <a href="#">VIIN</a>    | 412.2918 | 440.2867 | <a href="#">VIINP</a>   | 509.3446 | 537.3395 | <a href="#">VIINPT</a> | 610.3923 | 638.3872 |
| <a href="#">II</a>      | 199.1805 | 227.1754 | <a href="#">IIN</a>     | 313.2234 | 341.2183 | <a href="#">IINP</a>   | 410.2762 | 438.2711 |
| <a href="#">IINPT</a>   | 511.3239 | 539.3188 | <a href="#">IINPTT</a>  | 612.3715 | 640.3665 | <a href="#">IN</a>     | 200.1394 | 228.1343 |
| <a href="#">INP</a>     | 297.1921 | 325.1870 | <a href="#">INPT</a>    | 398.2398 | 426.2347 | <a href="#">INPTT</a>  | 499.2875 | 527.2824 |
| <a href="#">NP</a>      | 184.1081 | 212.1030 | <a href="#">NPT</a>     | 285.1557 | 313.1506 | <a href="#">NPTT</a>   | 386.2034 | 414.1983 |
| <a href="#">PT</a>      | 171.1128 | 199.1077 | <a href="#">PTT</a>     | 272.1605 | 300.1554 | <a href="#">TT</a>     | 175.1077 | 203.1026 |

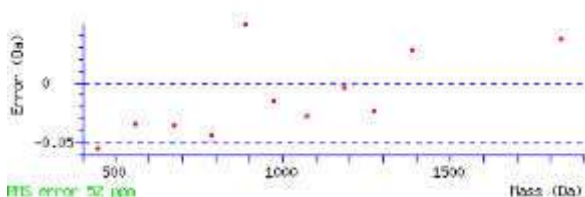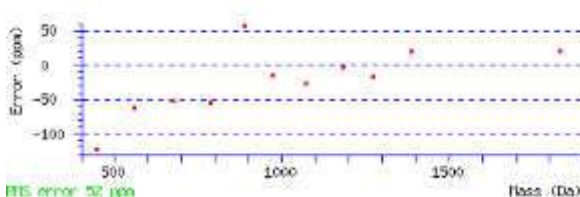

NCBI BLAST search of [YEDNFDANSNVSVIINPTTK](#)  
 (Parameters: blastp, nr protein database, expect=20000, no filter, PAM30)  
 Other BLAST [web gateways](#)

All matches to this query

| Score | Mr(calcd) | Delta   | Sequence                                |
|-------|-----------|---------|-----------------------------------------|
| 76.5  | 2240.0597 | 0.2367  | <a href="#">YEDNFDANSNVSVIINPTTK</a>    |
| 62.2  | 2240.0597 | 0.2367  | <a href="#">YEDNFDANSNVSVIIQPTSK</a>    |
| 17.0  | 2241.0801 | -0.7837 | <a href="#">YEDNFDATSNLSVIINPTTK</a>    |
| 10.7  | 2241.0437 | -0.7473 | <a href="#">AEDDELIVEGSISDAYFNVR</a>    |
| 8.7   | 2240.0359 | 0.2605  | <a href="#">NNTSGSLPNSWGGNSKNGEFR</a>   |
| 8.6   | 2241.2077 | -0.9113 | <a href="#">LTLNIDGSVKASTNNAGIGGALR</a> |
| 5.3   | 2240.1107 | 0.1857  | <a href="#">GMOVIDTGAPLSEPVGENTLGR</a>  |
| 3.3   | 2240.1722 | 0.1242  | <a href="#">DLLDILMDAAADPAAEVKLTR</a>   |
| 3.0   | 2239.1531 | 1.1433  | <a href="#">AQAAEAMLVDATRHLPAFR</a>     |
| 2.9   | 2241.2369 | -0.9405 | <a href="#">FAVEIIQAVVDEIGADKVGIR</a>   |

Mascot: <http://www.matrixscience.com/>

**MATRIX SCIENCE Mascot Search Results**

**Peptide View Spot no 24**

MS/MS Fragmentation of **TITEFGSP EEFLAQVDFLLGK**

Found in **gi|115470529** in **NCBI nr**, Os07g0141400 [Oryza sativa Japonica Group]

Match to Query 30: 2340.437524 from(2341.444800,1+) intensity(0.0000) index(11)

Title: Label: B12, Spot\_Id: 216654, Peak\_List\_Id: 221706, MSMS Job\_Run\_Id: 21388, Comment:

Data file C:\Documents and Settings\Administrator\Desktop\farah BHU\Cotton leaves\RAJESH\12-1-13 raj\ppw\_B12\_136117695600.txt

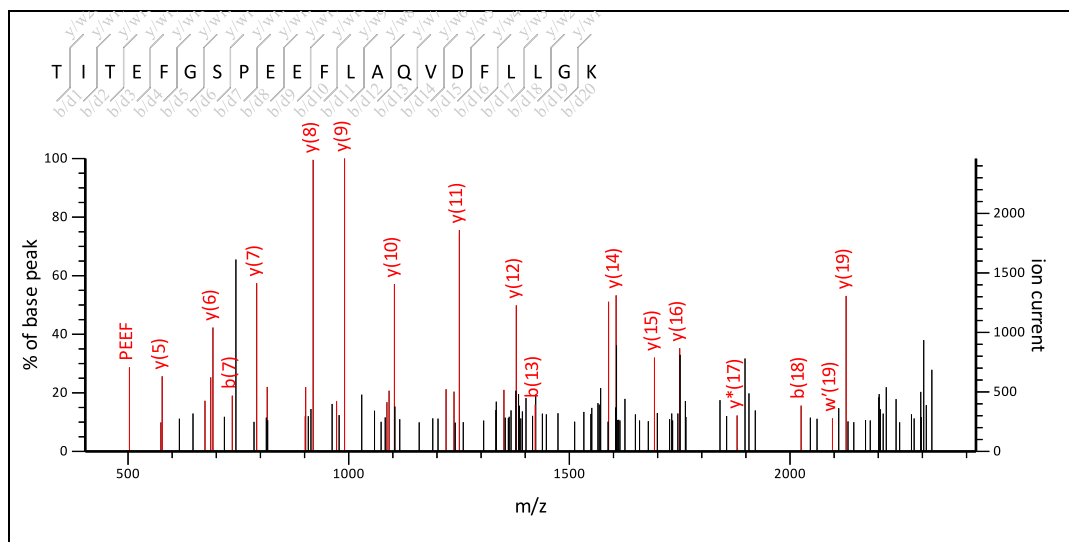

Navigation icons: Home, Back, Forward, Search, Print, Refresh. Search range: 403.2 to 2421.37

Label all possible matches  Label matches used for scoring

Monoisotopic mass of neutral peptide Mr(calc): 2340.1889

Fixed modifications: Carbamidomethyl (C) (apply to specified residues or termini only)

Ions Score: 67 Expect: 0.00048

Matches : 36/377 fragment ions using 55 most intense peaks [\(help\)](#)

| #  | Immon.   | a         | a*        | a <sup>0</sup> | b         | b*        | b <sup>0</sup> | d         | d'       | Seq. | v         | w         | w'        | y         | y*        |
|----|----------|-----------|-----------|----------------|-----------|-----------|----------------|-----------|----------|------|-----------|-----------|-----------|-----------|-----------|
| 1  | 74.0600  | 74.0600   |           | 56.0495        | 102.0550  |           | 84.0444        | 44.0495   |          | T    |           |           |           |           |           |
| 2  | 86.0964  | 187.1441  |           | 169.1335       | 215.1390  |           | 197.1285       | 159.1128  | 173.1285 | I    | 2182.0703 | 2195.0907 | 2209.1063 | 2240.1485 | 2223.1220 |
| 3  | 74.0600  | 288.1918  |           | 270.1812       | 316.1867  |           | 298.1761       | 272.1969  | 274.1761 | T    | 2081.0226 | 2094.0430 | 2096.0223 | 2127.0645 | 2110.0379 |
| 4  | 102.0550 | 417.2344  |           | 399.2238       | 445.2293  |           | 427.2187       | 359.2289  |          | E    | 1951.9800 | 1950.9848 |           | 2026.0168 | 2008.9902 |
| 5  | 120.0808 | 564.3028  |           | 546.2922       | 592.2977  |           | 574.2871       |           |          | F    | 1804.9116 |           |           | 1896.9742 | 1879.9476 |
| 6  | 30.0338  | 621.3243  |           | 603.3137       | 649.3192  |           | 631.3086       |           |          | G    |           |           |           | 1749.9058 | 1732.8792 |
| 7  | 60.0444  | 708.3563  |           | 690.3457       | 736.3512  |           | 718.3406       | 692.3614  |          | S    | 1660.8581 | 1659.8629 |           | 1692.8843 | 1675.8578 |
| 8  | 70.0651  | 805.4090  |           | 787.3985       | 833.4040  |           | 815.3934       | 779.3934  |          | P    | 1563.8053 | 1562.8101 |           | 1605.8523 | 1588.8257 |
| 9  | 102.0550 | 934.4516  |           | 916.4411       | 962.4466  |           | 944.4360       | 876.4462  |          | E    | 1434.7627 | 1433.7675 |           | 1508.7995 | 1491.7730 |
| 10 | 102.0550 | 1063.4942 |           | 1045.4837      | 1091.4891 |           | 1073.4786      | 1005.4888 |          | E    | 1305.7202 | 1304.7249 |           | 1379.7569 | 1362.7304 |
| 11 | 120.0808 | 1210.5626 |           | 1192.5521      | 1238.5576 |           | 1220.5470      |           |          | F    | 1158.6517 |           |           | 1250.7143 | 1233.6878 |
| 12 | 86.0964  | 1323.6467 |           | 1305.6361      | 1351.6416 |           | 1333.6311      | 1281.5998 |          | L    | 1045.5677 | 1044.5724 |           | 1103.6459 | 1086.6194 |
| 13 | 44.0495  | 1394.6838 |           | 1376.6733      | 1422.6787 |           | 1404.6682      |           |          | A    | 974.5306  |           |           | 990.5619  | 973.5353  |
| 14 | 101.0709 | 1522.7424 | 1505.7159 | 1504.7318      | 1550.7373 | 1533.7108 | 1532.7268      | 1465.7209 |          | Q    | 846.4720  | 845.4767  |           | 919.5247  | 902.4982  |
| 15 | 72.0808  | 1621.8108 | 1604.7843 | 1603.8003      | 1649.8057 | 1632.7792 | 1631.7952      | 1607.7952 |          | V    | 747.4036  | 760.4240  |           | 791.4662  | 774.4396  |
| 16 | 88.0393  | 1736.8378 | 1719.8112 | 1718.8272      | 1764.8327 | 1747.8061 | 1746.8221      | 1692.8479 |          | D    | 632.3766  | 631.3814  |           | 692.3978  | 675.3712  |
| 17 | 120.0808 | 1883.9062 | 1866.8796 | 1865.8956      | 1911.9011 | 1894.8745 | 1893.8905      |           |          | F    | 485.3082  |           |           | 577.3708  | 560.3443  |
| 18 | 86.0964  | 1996.9902 | 1979.9637 | 1978.9797      | 2024.9852 | 2007.9586 | 2006.9746      | 1954.9433 |          | L    | 372.2241  | 371.2289  |           | 430.3024  | 413.2758  |
| 19 | 86.0964  | 2110.0743 | 2093.0478 | 2092.0637      | 2138.0692 | 2121.0427 | 2120.0587      | 2068.0274 |          | L    | 259.1401  | 258.1448  |           | 317.2183  | 300.1918  |
| 20 | 30.0338  | 2167.0958 | 2150.0692 | 2149.0852      | 2195.0907 | 2178.0641 | 2177.0801      |           |          | G    |           |           |           | 204.1343  | 187.1077  |
| 21 | 101.1073 |           |           |                |           |           |                |           |          | K    | 74.0237   | 73.0284   |           | 147.1128  | 130.0863  |

| Seq | ya | yb | Seq | ya | yb | Seq | ya | yb |
|-----|----|----|-----|----|----|-----|----|----|
|     |    |    |     |    |    |     |    |    |

|               |          |          |               |          |          |               |          |          |
|---------------|----------|----------|---------------|----------|----------|---------------|----------|----------|
| <b>IT</b>     | 187.1441 | 215.1390 | <b>ITE</b>    | 316.1867 | 344.1816 | <b>ITEF</b>   | 463.2551 | 491.2500 |
| <b>ITEFG</b>  | 520.2766 | 548.2715 | <b>ITEFGS</b> | 607.3086 | 635.3035 | <b>TE</b>     | 203.1026 | 231.0975 |
| <b>TEF</b>    | 350.1710 | 378.1660 | <b>TEFG</b>   | 407.1925 | 435.1874 | <b>TEFGS</b>  | 494.2245 | 522.2195 |
| <b>TEFGSP</b> | 591.2773 | 619.2722 | <b>EF</b>     | 249.1234 | 277.1183 | <b>EFG</b>    | 306.1448 | 334.1397 |
| <b>EFGS</b>   | 393.1769 | 421.1718 | <b>EFGSP</b>  | 490.2296 | 518.2245 | <b>EFGSPE</b> | 619.2722 | 647.2671 |
| <b>FG</b>     | 177.1022 | 205.0972 | <b>FGS</b>    | 264.1343 | 292.1292 | <b>FGSP</b>   | 361.1870 | 389.1819 |
| <b>FGSPE</b>  | 490.2296 | 518.2245 | <b>FGSPEE</b> | 619.2722 | 647.2671 | <b>GS</b>     | 117.0659 | 145.0608 |
| <b>GSP</b>    | 214.1186 | 242.1135 | <b>GSPE</b>   | 343.1612 | 371.1561 | <b>GSPEE</b>  | 472.2038 | 500.1987 |
| <b>GSPEEF</b> | 619.2722 | 647.2671 | <b>SP</b>     | 157.0972 | 185.0921 | <b>SPE</b>    | 286.1397 | 314.1347 |
| <b>SPEE</b>   | 415.1823 | 443.1773 | <b>SPEEF</b>  | 562.2508 | 590.2457 | <b>SPEEFL</b> | 675.3348 | 703.3297 |
| <b>PE</b>     | 199.1077 | 227.1026 | <b>PEE</b>    | 328.1503 | 356.1452 | <b>PEEF</b>   | 475.2187 | 503.2136 |
| <b>PEEFL</b>  | 588.3028 | 616.2977 | <b>PEEFLA</b> | 659.3399 | 687.3348 | <b>EE</b>     | 231.0975 | 259.0925 |
| <b>EEF</b>    | 378.1660 | 406.1609 | <b>EEFL</b>   | 491.2500 | 519.2449 | <b>EEFLA</b>  | 562.2871 | 590.2821 |
| <b>EEFLAQ</b> | 690.3457 | 718.3406 | <b>EF</b>     | 249.1234 | 277.1183 | <b>EFL</b>    | 362.2074 | 390.2023 |
| <b>EFLA</b>   | 433.2445 | 461.2395 | <b>EFLAQ</b>  | 561.3031 | 589.2980 | <b>EFLAQV</b> | 660.3715 | 688.3665 |
| <b>FL</b>     | 233.1648 | 261.1598 | <b>FLA</b>    | 304.2020 | 332.1969 | <b>FLAQ</b>   | 432.2605 | 460.2554 |
| <b>FLAQV</b>  | 531.3289 | 559.3239 | <b>FLAQVD</b> | 646.3559 | 674.3508 | <b>LA</b>     | 157.1335 | 185.1285 |
| <b>LAQ</b>    | 285.1921 | 313.1870 | <b>LAQV</b>   | 384.2605 | 412.2554 | <b>LAQVD</b>  | 499.2875 | 527.2824 |
| <b>LAQVDF</b> | 646.3559 | 674.3508 | <b>AQ</b>     | 172.1081 | 200.1030 | <b>AQV</b>    | 271.1765 | 299.1714 |
| <b>AQVD</b>   | 386.2034 | 414.1983 | <b>AQVDF</b>  | 533.2718 | 561.2667 | <b>AQVDFL</b> | 646.3559 | 674.3508 |
| <b>QV</b>     | 200.1394 | 228.1343 | <b>QVD</b>    | 315.1663 | 343.1612 | <b>QVDF</b>   | 462.2347 | 490.2296 |
| <b>QVDFL</b>  | 575.3188 | 603.3137 | <b>QVDFLL</b> | 688.4028 | 716.3978 | <b>VD</b>     | 187.1077 | 215.1026 |
| <b>VDF</b>    | 334.1761 | 362.1710 | <b>VDFL</b>   | 447.2602 | 475.2551 | <b>VDFLL</b>  | 560.3443 | 588.3392 |
| <b>VDFLLG</b> | 617.3657 | 645.3606 | <b>DF</b>     | 235.1077 | 263.1026 | <b>DFL</b>    | 348.1918 | 376.1867 |
| <b>DFLL</b>   | 461.2758 | 489.2708 | <b>DFLLG</b>  | 518.2973 | 546.2922 | <b>FL</b>     | 233.1648 | 261.1598 |
| <b>FLL</b>    | 346.2489 | 374.2438 | <b>FLLG</b>   | 403.2704 | 431.2653 | <b>LL</b>     | 199.1805 | 227.1754 |
| <b>LLG</b>    | 256.2020 | 284.1969 | <b>LG</b>     | 143.1179 | 171.1128 |               |          |          |

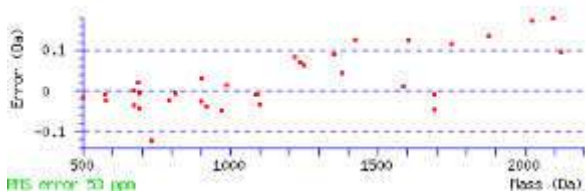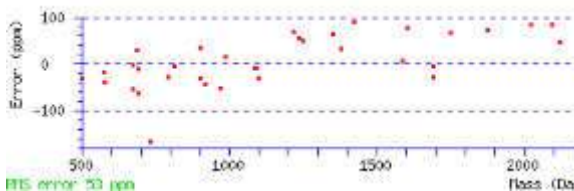

NCBI BLAST search of [TITEFGSPPEEFLAQVDFLLGK](#)  
 (Parameters: blastp, nr protein database, expect=20000, no filter, PAM30)  
 Other BLAST [web gateways](#)

All matches to this query

| Score | Mr(calc)  | Delta   | Sequence                                |
|-------|-----------|---------|-----------------------------------------|
| 66.8  | 2340.1889 | 0.2486  | <a href="#">TITEFGSPPEEFLAQVDFLLGK</a>  |
| 10.1  | 2341.1413 | -0.7037 | <a href="#">SEFVEAQEALVQMKDWFLR</a>     |
| 8.4   | 2340.1541 | 0.2834  | <a href="#">LCAVLGGTFAVTGMLDRWMSR</a>   |
| 7.8   | 2340.0991 | 0.3384  | <a href="#">LDGOWSTMALMGGEARIDNNK</a>   |
| 6.4   | 2341.1882 | -0.7507 | <a href="#">MATSTMPLGGASPSGRVLPALDR</a> |
| 5.9   | 2340.1566 | 0.2809  | <a href="#">TVFSTVIKINMGTTLACGDVNR</a>  |
| 5.5   | 2340.2325 | 0.2050  | <a href="#">LTFPSSSGGLAIRLPFSSTSSK</a>  |
| 4.8   | 2339.9780 | 0.4595  | <a href="#">AVGCNDAACALGSETOCLSDNK</a>  |
| 2.9   | 2341.1606 | -0.7231 | <a href="#">GHPPNRPVYTMLITMCGRGGK</a>   |
| 2.4   | 2339.2705 | 1.1670  | <a href="#">MLTSRVLNSTTMAIVILYAAR</a>   |

Mascot: <http://www.matrixscience.com/>

**MATRIX SCIENCE Mascot Search Results**

**Peptide View Spot no 24**

MS/MS Fragmentation of **YEDNFDANSVSIINPTTK**

Found in **gi|115470529** in **NCBI nr**, Os07g0141400 [Oryza sativa Japonica Group]

Match to Query 32: 2368.419724 from(2369.427000,1+) intensity(0.0000) index(12)

Title: Label: B12, Spot\_Id: 216654, Peak\_List\_Id: 221707, MSMS Job\_Run\_Id: 21388, Comment:

Data file C:\Documents and Settings\Administrator\Desktop\farah BHU\Cotton leaves\RAJESH\12-1-13 raj\ppw\_B12\_136117695600.txt

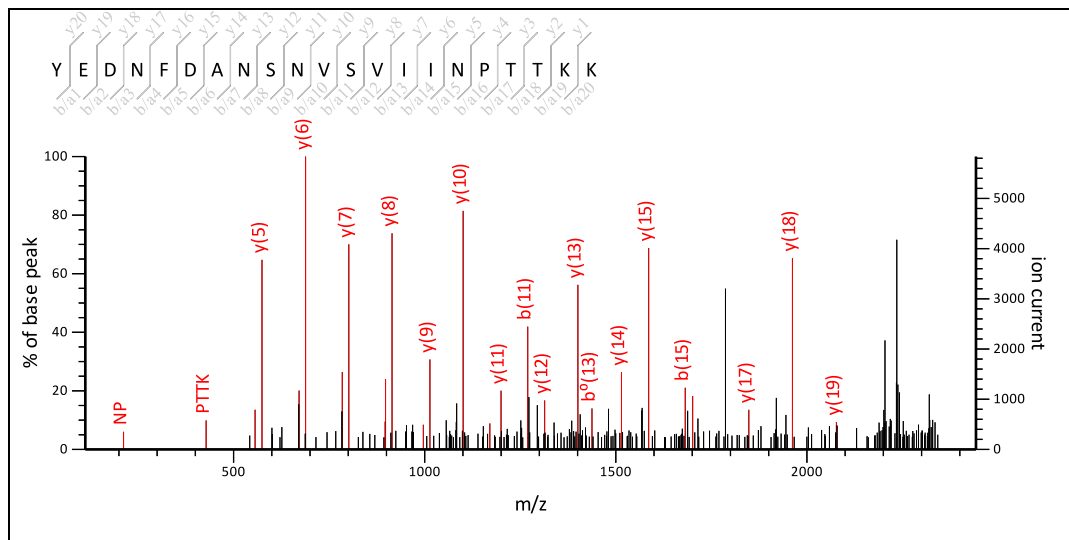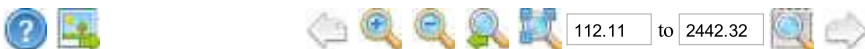

Label all possible matches  Label matches used for scoring

Monoisotopic mass of neutral peptide Mr(calc): 2368.1546

Fixed modifications: Carbamidomethyl (C) (apply to specified residues or termini only)

Ions Score: 116 Expect: 6.1e-09

Matches : 31/423 fragment ions using 40 most intense peaks (help)

| #  | Immon.   | a         | a*        | a <sup>0</sup> | b         | b*        | b <sup>0</sup> | d         | d'        | Seq. | v         | w         | w'       | y         | y*        |
|----|----------|-----------|-----------|----------------|-----------|-----------|----------------|-----------|-----------|------|-----------|-----------|----------|-----------|-----------|
| 1  | 136.0757 | 136.0757  |           |                | 164.0706  |           |                | 44.0495   |           | Y    |           |           |          |           |           |
| 2  | 102.0550 | 265.1183  |           | 247.1077       | 293.1132  |           | 275.1026       | 207.1128  |           | E    | 2132.0618 | 2131.0666 |          | 2206.0986 | 2189.0721 |
| 3  | 88.0393  | 380.1452  |           | 362.1347       | 408.1401  |           | 390.1296       | 336.1554  |           | D    | 2017.0349 | 2016.0396 |          | 2077.0560 | 2060.0295 |
| 4  | 87.0553  | 494.1882  | 477.1616  | 476.1776       | 522.1831  | 505.1565  | 504.1725       | 451.1823  |           | N    | 1902.9920 | 1901.9967 |          | 1962.0291 | 1945.0025 |
| 5  | 120.0808 | 641.2566  | 624.2300  | 623.2460       | 669.2515  | 652.2249  | 651.2409       |           |           | F    | 1755.9236 |           |          | 1847.9862 | 1830.9596 |
| 6  | 88.0393  | 756.2835  | 739.2570  | 738.2729       | 784.2784  | 767.2519  | 766.2679       | 712.2937  |           | D    | 1640.8966 | 1639.9014 |          | 1700.9177 | 1683.8912 |
| 7  | 44.0495  | 827.3206  | 810.2941  | 809.3101       | 855.3155  | 838.2890  | 837.3050       |           |           | A    | 1569.8595 |           |          | 1585.8908 | 1568.8642 |
| 8  | 87.0553  | 941.3636  | 924.3370  | 923.3530       | 969.3585  | 952.3319  | 951.3479       | 898.3577  |           | N    | 1455.8166 | 1454.8213 |          | 1514.8537 | 1497.8271 |
| 9  | 60.0444  | 1028.3956 | 1011.3690 | 1010.3850      | 1056.3905 | 1039.3639 | 1038.3799      | 1012.4007 |           | S    | 1368.7845 | 1367.7893 |          | 1400.8108 | 1383.7842 |
| 10 | 87.0553  | 1142.4385 | 1125.4120 | 1124.4279      | 1170.4334 | 1153.4069 | 1152.4229      | 1099.4327 |           | N    | 1254.7416 | 1253.7464 |          | 1313.7787 | 1296.7522 |
| 11 | 72.0808  | 1241.5069 | 1224.4804 | 1223.4964      | 1269.5018 | 1252.4753 | 1251.4913      | 1227.4913 |           | V    | 1155.6732 | 1168.6936 |          | 1199.7358 | 1182.7093 |
| 12 | 60.0444  | 1328.5389 | 1311.5124 | 1310.5284      | 1356.5339 | 1339.5073 | 1338.5233      | 1312.5440 |           | S    | 1068.6412 | 1067.6459 |          | 1100.6674 | 1083.6408 |
| 13 | 72.0808  | 1427.6074 | 1410.5808 | 1409.5968      | 1455.6023 | 1438.5757 | 1437.5917      | 1413.5917 |           | V    | 969.5728  | 982.5932  |          | 1013.6354 | 996.6088  |
| 14 | 86.0964  | 1540.6914 | 1523.6649 | 1522.6809      | 1568.6863 | 1551.6598 | 1550.6758      | 1512.6601 | 1526.6758 | I    | 856.4887  | 869.5091  | 883.5247 | 914.5669  | 897.5404  |
| 15 | 86.0964  | 1653.7755 | 1636.7489 | 1635.7649      | 1681.7704 | 1664.7439 | 1663.7598      | 1625.7442 | 1639.7598 | I    | 743.4046  | 756.4250  | 770.4407 | 801.4829  | 784.4563  |
| 16 | 87.0553  | 1767.8184 | 1750.7919 | 1749.8079      | 1795.8133 | 1778.7868 | 1777.8028      | 1724.8126 |           | N    | 629.3617  | 628.3665  |          | 688.3988  | 671.3723  |
| 17 | 70.0651  | 1864.8712 | 1847.8446 | 1846.8606      | 1892.8661 | 1875.8395 | 1874.8555      | 1838.8555 |           | P    | 532.3089  | 531.3137  |          | 574.3559  | 557.3293  |
| 18 | 74.0600  | 1965.9189 | 1948.8923 | 1947.9083      | 1993.9138 | 1976.8872 | 1975.9032      | 1949.9239 | 1951.9032 | T    | 431.2613  | 444.2817  | 446.2609 | 477.3031  | 460.2766  |
| 19 | 74.0600  | 2066.9665 | 2049.9400 | 2048.9560      | 2094.9615 | 2077.9349 | 2076.9509      | 2050.9716 | 2052.9509 | T    | 330.2136  | 343.2340  | 345.2132 | 376.2554  | 359.2289  |
| 20 | 101.1073 | 2195.0615 | 2178.0350 | 2177.0509      | 2223.0564 | 2206.0299 | 2205.0459      | 2138.0037 |           | K    | 202.1186  | 201.1234  |          | 275.2078  | 258.1812  |
| 21 | 101.1073 |           |           |                |           |           |                |           |           | K    | 74.0237   | 73.0284   |          | 147.1128  | 130.0863  |

| Seq | ya | yb | Seq | ya | yb | Seq | ya | yb |
|-----|----|----|-----|----|----|-----|----|----|
|-----|----|----|-----|----|----|-----|----|----|



|         |          |          |         |          |          |        |          |          |
|---------|----------|----------|---------|----------|----------|--------|----------|----------|
| ED      | 217.0819 | 245.0768 | EDN     | 331.1248 | 359.1197 | EDNF   | 478.1932 | 506.1882 |
| EDNFD   | 593.2202 | 621.2151 | EDNFDA  | 664.2573 | 692.2522 | DN     | 202.0822 | 230.0771 |
| DNF     | 349.1506 | 377.1456 | DNFD    | 464.1776 | 492.1725 | DNFDA  | 535.2147 | 563.2096 |
| DNFDAN  | 649.2576 | 677.2525 | NF      | 234.1237 | 262.1186 | NFD    | 349.1506 | 377.1456 |
| NFDA    | 420.1878 | 448.1827 | NFDAN   | 534.2307 | 562.2256 | NFDANS | 621.2627 | 649.2576 |
| FD      | 235.1077 | 263.1026 | FDA     | 306.1448 | 334.1397 | FDAN   | 420.1878 | 448.1827 |
| FDANS   | 507.2198 | 535.2147 | FDANSN  | 621.2627 | 649.2576 | DA     | 159.0764 | 187.0713 |
| DAN     | 273.1193 | 301.1143 | DANS    | 360.1514 | 388.1463 | DANSN  | 474.1943 | 502.1892 |
| DANSNV  | 573.2627 | 601.2576 | DANSNVS | 660.2947 | 688.2897 | AN     | 158.0924 | 186.0873 |
| ANS     | 245.1244 | 273.1193 | ANSN    | 359.1674 | 387.1623 | ANSNV  | 458.2358 | 486.2307 |
| ANSNVS  | 545.2678 | 573.2627 | ANSNVS  | 644.3362 | 672.3311 | NS     | 174.0873 | 202.0822 |
| NSN     | 288.1302 | 316.1252 | NSNV    | 387.1987 | 415.1936 | NSNVS  | 474.2307 | 502.2256 |
| NSNVS   | 573.2991 | 601.2940 | NSNVS   | 686.3832 | 714.3781 | SN     | 174.0873 | 202.0822 |
| SNV     | 273.1557 | 301.1506 | SNVS    | 360.1878 | 388.1827 | SNVSV  | 459.2562 | 487.2511 |
| SNVSV   | 572.3402 | 600.3352 | SNVSVII | 685.4243 | 713.4192 | NV     | 186.1237 | 214.1186 |
| NVS     | 273.1557 | 301.1506 | NVSV    | 372.2241 | 400.2191 | NVSVI  | 485.3082 | 513.3031 |
| NVSVII  | 598.3923 | 626.3872 | VS      | 159.1128 | 187.1077 | VSV    | 258.1812 | 286.1761 |
| VSVI    | 371.2653 | 399.2602 | VSVII   | 484.3493 | 512.3443 | VSVIIN | 598.3923 | 626.3872 |
| VSVIINP | 695.4450 | 723.4400 | SV      | 159.1128 | 187.1077 | SVI    | 272.1969 | 300.1918 |
| SVII    | 385.2809 | 413.2758 | SVIIN   | 499.3239 | 527.3188 | SVIINP | 596.3766 | 624.3715 |
| SVIINPT | 697.4243 | 725.4192 | VI      | 185.1648 | 213.1598 | VII    | 298.2489 | 326.2438 |
| VIIIN   | 412.2918 | 440.2867 | VIINP   | 509.3446 | 537.3395 | VIINPT | 610.3923 | 638.3872 |
| II      | 199.1805 | 227.1754 | IIN     | 313.2234 | 341.2183 | IINP   | 410.2762 | 438.2711 |
| IINPT   | 511.3239 | 539.3188 | IINPTT  | 612.3715 | 640.3665 | IN     | 200.1394 | 228.1343 |
| INP     | 297.1921 | 325.1870 | INPT    | 398.2398 | 426.2347 | INPTT  | 499.2875 | 527.2824 |
| INPTTK  | 627.3824 | 655.3774 | NP      | 184.1081 | 212.1030 | NPT    | 285.1557 | 313.1506 |
| NPTT    | 386.2034 | 414.1983 | NPTTK   | 514.2984 | 542.2933 | PT     | 171.1128 | 199.1077 |
| PTT     | 272.1605 | 300.1554 | PTTK    | 400.2554 | 428.2504 | TT     | 175.1077 | 203.1026 |
| TTK     | 303.2027 | 331.1976 | TK      | 202.1550 | 230.1499 |        |          |          |

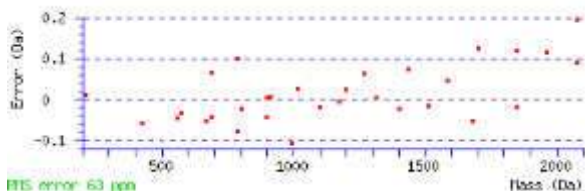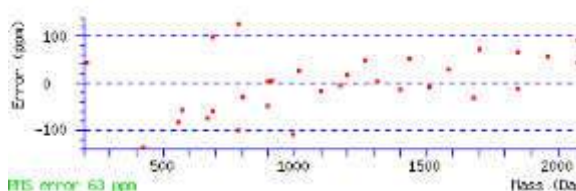

NCBI BLAST search of [YEDNFDANSNVSVIINPTTKK](#)  
 (Parameters: blastp, nr protein database, expect=20000, no filter, PAM30)  
 Other BLAST [web gateways](#)

All matches to this query

| Score | Mr(calc)  | Delta   | Sequence                              |
|-------|-----------|---------|---------------------------------------|
| 115.8 | 2368.1546 | 0.2651  | <a href="#">YEDNFDANSNVSVIINPTTKK</a> |
| 93.7  | 2368.1546 | 0.2651  | <a href="#">YEDNFDANSNVSVIIQPTSKK</a> |
| 14.3  | 2369.1750 | -0.7553 | <a href="#">YEDNFDATSNLSVIINPTTKK</a> |
| 7.5   | 2369.2168 | -0.7971 | <a href="#">GYHRTIEGVGFISILNDFK</a>   |
| 6.9   | 2368.1771 | 0.2426  | <a href="#">ITNPWANEDAVVNVSLTPRR</a>  |
| 6.8   | 2368.2461 | 0.1736  | <a href="#">LTDRSDVFSFGVMLELITGR</a>  |
| 6.8   | 2368.2461 | 0.1736  | <a href="#">LTDRSDVFSFGVMLELLTGR</a>  |
| 6.0   | 2369.1362 | -0.7165 | <a href="#">FITHVPESEINKAFDNMDK</a>   |
| 6.0   | 2369.1548 | -0.7351 | <a href="#">FITHVPESEINKAFDNMMK</a>   |
| 6.0   | 2369.2955 | -0.8757 | <a href="#">TPVLRFLTLEGNDLIDLGLR</a>  |

Mascot: <http://www.matrixscience.com/>

**MATRIX SCIENCE Mascot Search Results**

**Peptide View Spot no 24**

MS/MS Fragmentation of **KTITEFGSPEEFLAQVDLLGK**

Found in **gi|115470529** in **NCBI nr**, Os07g0141400 [Oryza sativa Japonica Group]

Match to Query 34: 2468.557924 from(2469.565200,1+) intensity(0.0000) index(13)

Title: Label: B12, Spot\_Id: 216654, Peak\_List\_Id: 221708, MSMS Job\_Run\_Id: 21388, Comment:

Data file C:\Documents and Settings\Administrator\Desktop\farah BHU\Cotton leaves\RAJESH\12-1-13 raj\ppw\_B12\_136117695600.txt

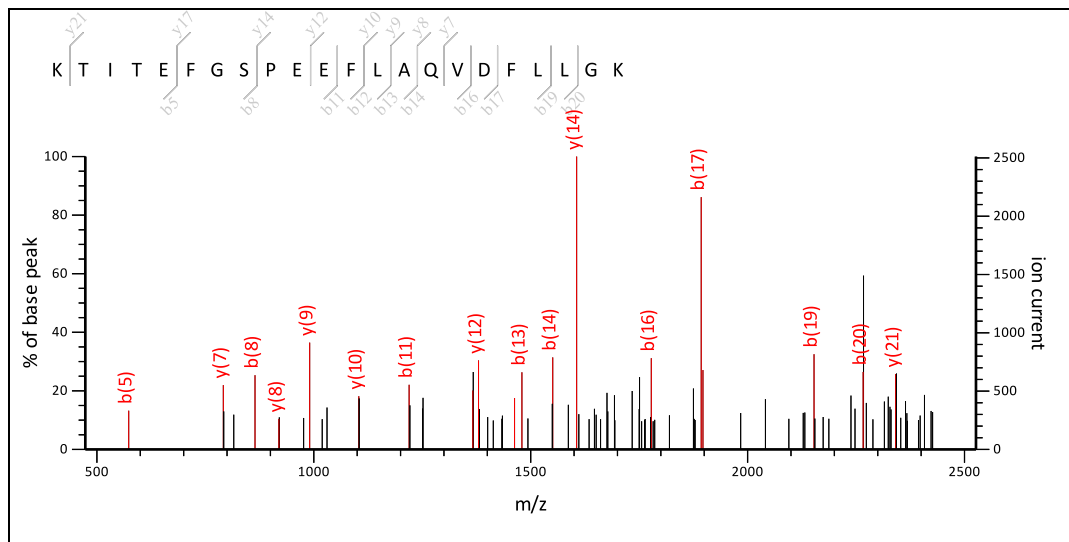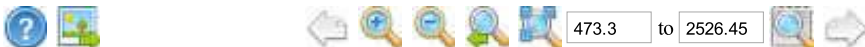

Label all possible matches  Label matches used for scoring

Monoisotopic mass of neutral peptide Mr(calc): 2468.2839

Fixed modifications: Carbamidomethyl (C) (apply to specified residues or termini only)

Ions Score: 60 Expect: 0.0022

Matches : 19/426 fragment ions using 35 most intense peaks [\(help\)](#)

| #  | Immon.   | a         | a*        | a <sup>0</sup> | b                | b*               | b <sup>0</sup> | d         | d'       | Seq.     | v         | w         | w'        | y                | y*        |
|----|----------|-----------|-----------|----------------|------------------|------------------|----------------|-----------|----------|----------|-----------|-----------|-----------|------------------|-----------|
| 1  | 101.1073 | 101.1073  | 84.0808   |                | 129.1022         | 112.0757         |                | 44.0495   |          | <b>K</b> |           |           |           |                  |           |
| 2  | 74.0600  | 202.1550  | 185.1285  | 184.1444       | 230.1499         | 213.1234         | 212.1394       | 186.1601  | 188.1394 | <b>T</b> | 2295.1543 | 2308.1747 | 2310.1540 | <b>2341.1962</b> | 2324.1697 |
| 3  | 86.0964  | 315.2391  | 298.2125  | 297.2285       | 343.2340         | 326.2074         | 325.2234       | 287.2078  | 301.2234 | <b>I</b> | 2182.0703 | 2195.0907 | 2209.1063 | 2240.1485        | 2223.1220 |
| 4  | 74.0600  | 416.2867  | 399.2602  | 398.2762       | 444.2817         | 427.2551         | 426.2711       | 400.2918  | 402.2711 | <b>T</b> | 2081.0226 | 2094.0430 | 2096.0223 | 2127.0645        | 2110.0379 |
| 5  | 102.0550 | 545.3293  | 528.3028  | 527.3188       | <b>573.3243</b>  | 556.2977         | 555.3137       | 487.3239  |          | <b>E</b> | 1951.9800 | 1950.9848 |           | 2026.0168        | 2008.9902 |
| 6  | 120.0808 | 692.3978  | 675.3712  | 674.3872       | 720.3927         | 703.3661         | 702.3821       |           |          | <b>F</b> | 1804.9116 |           |           | <b>1896.9742</b> | 1879.9476 |
| 7  | 30.0338  | 749.4192  | 732.3927  | 731.4087       | 777.4141         | 760.3876         | 759.4036       |           |          | <b>G</b> |           |           |           | 1749.9058        | 1732.8792 |
| 8  | 60.0444  | 836.4512  | 819.4247  | 818.4407       | <b>864.4462</b>  | 847.4196         | 846.4356       | 820.4563  |          | <b>S</b> | 1660.8581 | 1659.8629 |           | 1692.8843        | 1675.8578 |
| 9  | 70.0651  | 933.5040  | 916.4775  | 915.4934       | 961.4989         | 944.4724         | 943.4884       | 907.4884  |          | <b>P</b> | 1563.8053 | 1562.8101 |           | <b>1605.8523</b> | 1588.8257 |
| 10 | 102.0550 | 1062.5466 | 1045.5201 | 1044.5360      | 1090.5415        | 1073.5150        | 1072.5310      | 1004.5411 |          | <b>E</b> | 1434.7627 | 1433.7675 |           | 1508.7995        | 1491.7730 |
| 11 | 102.0550 | 1191.5892 | 1174.5626 | 1173.5786      | <b>1219.5841</b> | 1202.5576        | 1201.5735      | 1133.5837 |          | <b>E</b> | 1305.7202 | 1304.7249 |           | <b>1379.7569</b> | 1362.7304 |
| 12 | 120.0808 | 1338.6576 | 1321.6311 | 1320.6470      | <b>1366.6525</b> | 1349.6260        | 1348.6420      |           |          | <b>F</b> | 1158.6517 |           |           | 1250.7143        | 1233.6878 |
| 13 | 86.0964  | 1451.7417 | 1434.7151 | 1433.7311      | <b>1479.7366</b> | <b>1462.7100</b> | 1461.7260      | 1409.6947 |          | <b>L</b> | 1045.5677 | 1044.5724 |           | <b>1103.6459</b> | 1086.6194 |
| 14 | 44.0495  | 1522.7788 | 1505.7522 | 1504.7682      | <b>1550.7737</b> | 1533.7472        | 1532.7631      |           |          | <b>A</b> | 974.5306  |           |           | <b>990.5619</b>  | 973.5353  |
| 15 | 101.0709 | 1650.8374 | 1633.8108 | 1632.8268      | 1678.8323        | 1661.8057        | 1660.8217      | 1593.8159 |          | <b>Q</b> | 846.4720  | 845.4767  |           | <b>919.5247</b>  | 902.4982  |
| 16 | 72.0808  | 1749.9058 | 1732.8792 | 1731.8952      | <b>1777.9007</b> | 1760.8741        | 1759.8901      | 1735.8901 |          | <b>V</b> | 747.4036  | 760.4240  |           | <b>791.4662</b>  | 774.4396  |
| 17 | 88.0393  | 1864.9327 | 1847.9062 | 1846.9222      | <b>1892.9276</b> | 1875.9011        | 1874.9171      | 1820.9429 |          | <b>D</b> | 632.3766  | 631.3814  |           | 692.3978         | 675.3712  |
| 18 | 120.0808 | 2012.0011 | 1994.9746 | 1993.9906      | 2039.9961        | 2022.9695        | 2021.9855      |           |          | <b>F</b> | 485.3082  |           |           | 577.3708         | 560.3443  |
| 19 | 86.0964  | 2125.0852 | 2108.0587 | 2107.0746      | <b>2153.0801</b> | 2136.0536        | 2135.0695      | 2083.0383 |          | <b>L</b> | 372.2241  | 371.2289  |           | 430.3024         | 413.2758  |
| 20 | 86.0964  | 2238.1693 | 2221.1427 | 2220.1587      | <b>2266.1642</b> | 2249.1376        | 2248.1536      | 2196.1223 |          | <b>L</b> | 259.1401  | 258.1448  |           | 317.2183         | 300.1918  |
| 21 | 30.0338  | 2295.1907 | 2278.1642 | 2277.1802      | 2323.1856        | 2306.1591        | 2305.1751      |           |          | <b>G</b> |           |           |           | 204.1343         | 187.1077  |
| 22 | 101.1073 |           |           |                |                  |                  |                |           |          | <b>K</b> | 74.0237   | 73.0284   |           | 147.1128         | 130.0863  |



| Seq    | ya       | yb       | Seq    | ya       | yb       | Seq    | ya       | yb       |
|--------|----------|----------|--------|----------|----------|--------|----------|----------|
| TI     | 187.1441 | 215.1390 | TIT    | 288.1918 | 316.1867 | TITE   | 417.2344 | 445.2293 |
| TITEF  | 564.3028 | 592.2977 | TITEFG | 621.3243 | 649.3192 | IT     | 187.1441 | 215.1390 |
| ITE    | 316.1867 | 344.1816 | ITEF   | 463.2551 | 491.2500 | ITEFG  | 520.2766 | 548.2715 |
| ITEFGS | 607.3086 | 635.3035 | TE     | 203.1026 | 231.0975 | TEF    | 350.1710 | 378.1660 |
| TEFG   | 407.1925 | 435.1874 | TEFGS  | 494.2245 | 522.2195 | TEFGSP | 591.2773 | 619.2722 |
| EF     | 249.1234 | 277.1183 | EFG    | 306.1448 | 334.1397 | EFGS   | 393.1769 | 421.1718 |
| EFGSP  | 490.2296 | 518.2245 | EFGSPE | 619.2722 | 647.2671 | FG     | 177.1022 | 205.0972 |
| FGS    | 264.1343 | 292.1292 | FGSP   | 361.1870 | 389.1819 | FGSPE  | 490.2296 | 518.2245 |
| FGSPEE | 619.2722 | 647.2671 | GS     | 117.0659 | 145.0608 | GSP    | 214.1186 | 242.1135 |
| GSPE   | 343.1612 | 371.1561 | GSPEE  | 472.2038 | 500.1987 | GSPEEF | 619.2722 | 647.2671 |
| SP     | 157.0972 | 185.0921 | SPE    | 286.1397 | 314.1347 | SPEE   | 415.1823 | 443.1773 |
| SPEEF  | 562.2508 | 590.2457 | SPEEFL | 675.3348 | 703.3297 | PE     | 199.1077 | 227.1026 |
| PEE    | 328.1503 | 356.1452 | PEEF   | 475.2187 | 503.2136 | PEEFL  | 588.3028 | 616.2977 |
| PEEFLA | 659.3399 | 687.3348 | EE     | 231.0975 | 259.0925 | EEF    | 378.1660 | 406.1609 |
| EEFL   | 491.2500 | 519.2449 | EEFLA  | 562.2871 | 590.2821 | EEFLAQ | 690.3457 | 718.3406 |
| EF     | 249.1234 | 277.1183 | EFL    | 362.2074 | 390.2023 | EFLA   | 433.2445 | 461.2395 |
| EFLAQ  | 561.3031 | 589.2980 | EFLAQV | 660.3715 | 688.3665 | FL     | 233.1648 | 261.1598 |
| FLA    | 304.2020 | 332.1969 | FLAQ   | 432.2605 | 460.2554 | FLAQV  | 531.3289 | 559.3239 |
| FLAQVD | 646.3559 | 674.3508 | LA     | 157.1335 | 185.1285 | LAQ    | 285.1921 | 313.1870 |
| LAQV   | 384.2605 | 412.2554 | LAQVD  | 499.2875 | 527.2824 | LAQVDF | 646.3559 | 674.3508 |
| AQ     | 172.1081 | 200.1030 | AQV    | 271.1765 | 299.1714 | AQVD   | 386.2034 | 414.1983 |
| AQVDF  | 533.2718 | 561.2667 | AQVDFL | 646.3559 | 674.3508 | QV     | 200.1394 | 228.1343 |
| QVD    | 315.1663 | 343.1612 | QVDF   | 462.2347 | 490.2296 | QVDFL  | 575.3188 | 603.3137 |
| QVDFLL | 688.4028 | 716.3978 | VD     | 187.1077 | 215.1026 | VDF    | 334.1761 | 362.1710 |
| VDFL   | 447.2602 | 475.2551 | VDFLL  | 560.3443 | 588.3392 | VDFLLG | 617.3657 | 645.3606 |
| DF     | 235.1077 | 263.1026 | DFL    | 348.1918 | 376.1867 | DFLL   | 461.2758 | 489.2708 |
| DFLLG  | 518.2973 | 546.2922 | FL     | 233.1648 | 261.1598 | FLL    | 346.2489 | 374.2438 |
| FLLG   | 403.2704 | 431.2653 | LL     | 199.1805 | 227.1754 | LLG    | 256.2020 | 284.1969 |
| LG     | 143.1179 | 171.1128 |        |          |          |        |          |          |

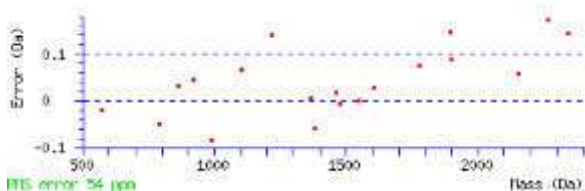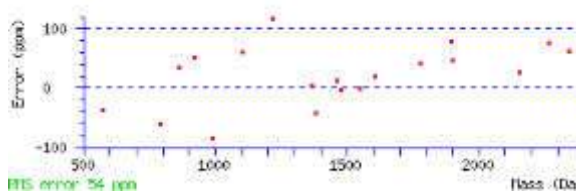

NCBI BLAST search of [KTITEFGSPPEEFLAQVDFLLGK](#)  
 (Parameters: blastp, nr protein database, expect=20000, no filter, PAM30)  
 Other BLAST [web gateways](#)

All matches to this query

| Score | Mr(calcd) | Delta   | Sequence                                    |
|-------|-----------|---------|---------------------------------------------|
| 59.6  | 2468.2839 | 0.2740  | <a href="#">KTITEFGSPPEEFLAQVDFLLGK</a>     |
| 10.4  | 2468.2369 | 0.3210  | <a href="#">QLTSCESLALGDYPVEVRLYR</a>       |
| 8.6   | 2468.2482 | 0.3097  | <a href="#">NDEVLT FELMSQK GQGPHLLGR</a>    |
| 7.1   | 2468.2071 | 0.3508  | <a href="#">NOTDNSSIFPFDDVAVSTLTK</a>       |
| 6.7   | 2468.1749 | 0.3830  | <a href="#">LADIFLDMALGCMOKQLDDSGK</a>      |
| 6.7   | 2468.1386 | 0.4194  | <a href="#">LADIFLDMALGCMQQQLDDSGK</a>      |
| 4.2   | 2468.1399 | 0.4180  | <a href="#">KIHDMNPGPEHYACMVDLLGR</a>       |
| 4.1   | 2468.1449 | 0.4130  | <a href="#">MATVDGTTAPSSGGKTATVASESGGGR</a> |
| 3.9   | 2468.1716 | 0.3864  | <a href="#">AKVFMADLEDALSPWENLMR</a>        |
| 3.8   | 2469.1733 | -0.6154 | <a href="#">EAYELAVAEGADFIECDVVLTR</a>      |

**MATRIX SCIENCE Mascot Search Results**

**Peptide View Spot no 24**

MS/MS Fragmentation of **TDSEGGFESDAVATANILESSAPVVGGK**

Found in **gi|115470529** in **NCBI nr**, Os07g0141400 [Oryza sativa Japonica Group]

Match to Query 38: 2707.608424 from(2708.615700,1+) intensity(0.0000) index(15)

Title: Label: B12, Spot\_Id: 216654, Peak\_List\_Id: 221717, MSMS Job\_Run\_Id: 21388, Comment:

Data file C:\Documents and Settings\Administrator\Desktop\farah BHU\Cotton leaves\RAJESH\12-1-13 raj\ppw\_B12\_136117695600.txt

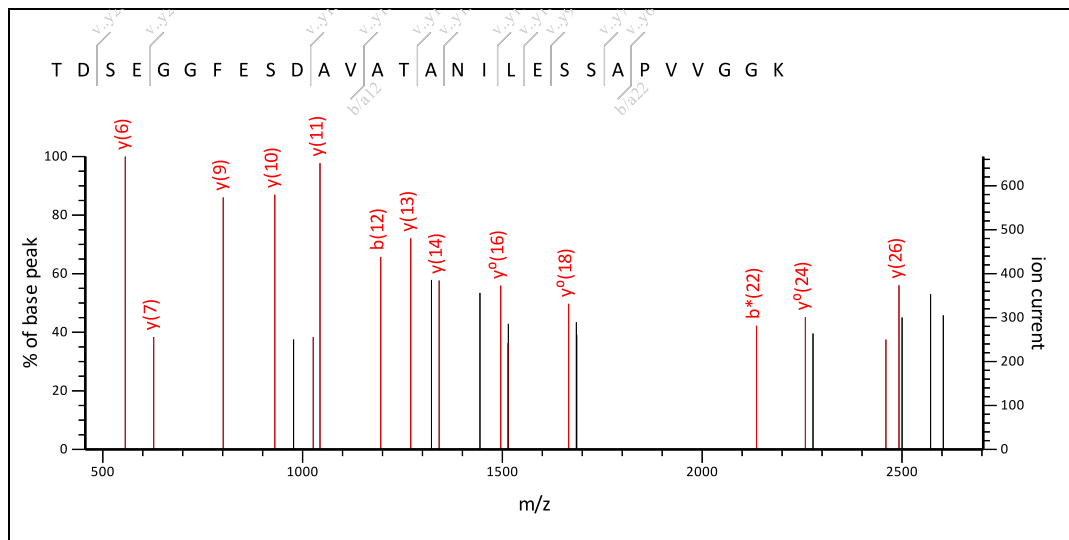

Navigation icons: Home, Back, Forward, Search, Print, Refresh. Search range: 456.3 to 2703.34

Label all possible matches  Label matches used for scoring

Monoisotopic mass of neutral peptide Mr(calc): 2707.2825

Fixed modifications: Carbamidomethyl (C) (apply to specified residues or termini only)

Ions Score: 51 Expect: 0.017

Matches : 22/561 fragment ions using 26 most intense peaks (help)

| #  | Immon.   | a         | a*        | a <sup>0</sup> | b         | b*        | b <sup>0</sup> | d         | d'        | Seq. | v         | w         | w'        | y         | y*        |
|----|----------|-----------|-----------|----------------|-----------|-----------|----------------|-----------|-----------|------|-----------|-----------|-----------|-----------|-----------|
| 1  | 74.0600  | 74.0600   |           | 56.0495        | 102.0550  |           | 84.0444        | 44.0495   |           | T    |           |           |           |           |           |
| 2  | 88.0393  | 189.0870  |           | 171.0764       | 217.0819  |           | 199.0713       | 145.0972  |           | D    | 2547.2209 | 2546.2257 |           | 2607.2420 | 2590.2155 |
| 3  | 60.0444  | 276.1190  |           | 258.1084       | 304.1139  |           | 286.1034       | 260.1241  |           | S    | 2460.1889 | 2459.1936 |           | 2492.2151 | 2475.1886 |
| 4  | 102.0550 | 405.1616  |           | 387.1510       | 433.1565  |           | 415.1460       | 347.1561  |           | E    | 2331.1463 | 2330.1510 |           | 2405.1831 | 2388.1565 |
| 5  | 30.0338  | 462.1831  |           | 444.1725       | 490.1780  |           | 472.1674       |           |           | G    |           |           |           | 2276.1405 | 2259.1139 |
| 6  | 30.0338  | 519.2045  |           | 501.1940       | 547.1994  |           | 529.1889       |           |           | G    |           |           |           | 2219.1190 | 2202.0925 |
| 7  | 120.0808 | 666.2729  |           | 648.2624       | 694.2679  |           | 676.2573       |           |           | F    | 2070.0350 |           |           | 2162.0976 | 2145.0710 |
| 8  | 102.0550 | 795.3155  |           | 777.3050       | 823.3105  |           | 805.2999       | 737.3101  |           | E    | 1940.9924 | 1939.9971 |           | 2015.0291 | 1998.0026 |
| 9  | 60.0444  | 882.3476  |           | 864.3370       | 910.3425  |           | 892.3319       | 866.3527  |           | S    | 1853.9603 | 1852.9651 |           | 1885.9865 | 1868.9600 |
| 10 | 88.0393  | 997.3745  |           | 979.3639       | 1025.3694 |           | 1007.3589      | 953.3847  |           | D    | 1738.9334 | 1737.9381 |           | 1798.9545 | 1781.9280 |
| 11 | 44.0495  | 1068.4116 |           | 1050.4011      | 1096.4065 |           | 1078.3960      |           |           | A    | 1667.8963 |           |           | 1683.9276 | 1666.9010 |
| 12 | 72.0808  | 1167.4800 |           | 1149.4695      | 1195.4750 |           | 1177.4644      | 1153.4644 |           | V    | 1568.8279 | 1581.8483 |           | 1612.8905 | 1595.8639 |
| 13 | 44.0495  | 1238.5172 |           | 1220.5066      | 1266.5121 |           | 1248.5015      |           |           | A    | 1497.7907 |           |           | 1513.8220 | 1496.7955 |
| 14 | 74.0600  | 1339.5648 |           | 1321.5543      | 1367.5597 |           | 1349.5492      | 1323.5699 | 1325.5492 | T    | 1396.7431 | 1409.7635 | 1411.7427 | 1442.7849 | 1425.7584 |
| 15 | 44.0495  | 1410.6019 |           | 1392.5914      | 1438.5969 |           | 1420.5863      |           |           | A    | 1325.7060 |           |           | 1341.7373 | 1324.7107 |
| 16 | 87.0553  | 1524.6449 | 1507.6183 | 1506.6343      | 1552.6398 | 1535.6132 | 1534.6292      | 1481.6391 |           | N    | 1211.6630 | 1210.6678 |           | 1270.7001 | 1253.6736 |
| 17 | 86.0964  | 1637.7289 | 1620.7024 | 1619.7184      | 1665.7239 | 1648.6973 | 1647.7133      | 1609.6976 | 1623.7133 | I    | 1098.5790 | 1111.5994 | 1125.6150 | 1156.6572 | 1139.6307 |
| 18 | 86.0964  | 1750.8130 | 1733.7865 | 1732.8024      | 1778.8079 | 1761.7814 | 1760.7973      | 1708.7660 |           | L    | 985.4949  | 984.4997  |           | 1043.5732 | 1026.5466 |
| 19 | 102.0550 | 1879.8556 | 1862.8290 | 1861.8450      | 1907.8505 | 1890.8240 | 1889.8399      | 1821.8501 |           | E    | 856.4523  | 855.4571  |           | 930.4891  | 913.4625  |
| 20 | 60.0444  | 1966.8876 | 1949.8611 | 1948.8771      | 1994.8825 | 1977.8560 | 1976.8720      | 1950.8927 |           | S    | 769.4203  | 768.4250  |           | 801.4465  | 784.4199  |
| 21 | 60.0444  | 2053.9196 | 2036.8931 | 2035.9091      | 2081.9146 | 2064.8880 | 2063.9040      | 2037.9247 |           | S    | 682.3883  | 681.3930  |           | 714.4145  | 697.3879  |
| 22 | 44.0495  | 2124.9568 | 2107.9302 | 2106.9462      | 2152.9517 | 2135.9251 | 2134.9411      |           |           | A    | 611.3511  |           |           | 627.3824  | 610.3559  |
| 23 | 70.0651  | 2222.0095 | 2204.9830 | 2203.9990      | 2250.0044 | 2232.9779 | 2231.9939      | 2195.9939 |           | P    | 514.2984  | 513.3031  |           | 556.3453  | 539.3188  |

|    |          |           |           |           |           |           |           |           |  |   |          |          |  |          |          |
|----|----------|-----------|-----------|-----------|-----------|-----------|-----------|-----------|--|---|----------|----------|--|----------|----------|
| 24 | 72.0808  | 2321.0779 | 2304.0514 | 2303.0674 | 2349.0729 | 2332.0463 | 2331.0623 | 2307.0623 |  | V | 415.2300 | 428.2504 |  | 459.2926 | 442.2660 |
| 25 | 72.0808  | 2420.1464 | 2403.1198 | 2402.1358 | 2448.1413 | 2431.1147 | 2430.1307 | 2406.1307 |  | V | 316.1615 | 329.1819 |  | 360.2241 | 343.1976 |
| 26 | 30.0338  | 2477.1678 | 2460.1413 | 2459.1573 | 2505.1627 | 2488.1362 | 2487.1522 |           |  | G |          |          |  | 261.1557 | 244.1292 |
| 27 | 30.0338  | 2534.1893 | 2517.1627 | 2516.1787 | 2562.1842 | 2545.1576 | 2544.1736 |           |  | G |          |          |  | 204.1343 | 187.1077 |
| 28 | 101.1073 |           |           |           |           |           |           |           |  | K | 74.0237  | 73.0284  |  | 147.1128 | 130.0863 |

| Seq     | ya       | yb       | Seq     | ya       | yb       | Seq      | ya       | yb       |
|---------|----------|----------|---------|----------|----------|----------|----------|----------|
| DS      | 175.0713 | 203.0662 | DSE     | 304.1139 | 332.1088 | DSEG     | 361.1354 | 389.1303 |
| DSEGG   | 418.1569 | 446.1518 | DSEGGF  | 565.2253 | 593.2202 | DSEGGFE  | 694.2679 | 722.2628 |
| SE      | 189.0870 | 217.0819 | SEG     | 246.1084 | 274.1034 | SEGG     | 303.1299 | 331.1248 |
| SEGGF   | 450.1983 | 478.1932 | SEGGFE  | 579.2409 | 607.2358 | SEGGFES  | 666.2729 | 694.2679 |
| EG      | 159.0764 | 187.0713 | EGG     | 216.0979 | 244.0928 | EGGF     | 363.1663 | 391.1612 |
| EGGFE   | 492.2089 | 520.2038 | EGGFES  | 579.2409 | 607.2358 | EGGFESD  | 694.2679 | 722.2628 |
| GG      | 87.0553  | 115.0502 | GGF     | 234.1237 | 262.1186 | GGFE     | 363.1663 | 391.1612 |
| GGFES   | 450.1983 | 478.1932 | GGFESD  | 565.2253 | 593.2202 | GGFESDA  | 636.2624 | 664.2573 |
| GF      | 177.1022 | 205.0972 | GFE     | 306.1448 | 334.1397 | GFES     | 393.1769 | 421.1718 |
| GFESD   | 508.2038 | 536.1987 | GFESDA  | 579.2409 | 607.2358 | GFESDAV  | 678.3093 | 706.3042 |
| FE      | 249.1234 | 277.1183 | FES     | 336.1554 | 364.1503 | FESD     | 451.1823 | 479.1773 |
| FESDA   | 522.2195 | 550.2144 | FESDAV  | 621.2879 | 649.2828 | FESDAVA  | 692.3250 | 720.3199 |
| ES      | 189.0870 | 217.0819 | ESD     | 304.1139 | 332.1088 | ESDA     | 375.1510 | 403.1460 |
| ESDAV   | 474.2195 | 502.2144 | ESDAVA  | 545.2566 | 573.2515 | ESDAVAT  | 646.3042 | 674.2992 |
| SD      | 175.0713 | 203.0662 | SDA     | 246.1084 | 274.1034 | SDAV     | 345.1769 | 373.1718 |
| SDAVA   | 416.2140 | 444.2089 | SDAVAT  | 517.2617 | 545.2566 | SDAVATA  | 588.2988 | 616.2937 |
| DA      | 159.0764 | 187.0713 | DAV     | 258.1448 | 286.1397 | DAVA     | 329.1819 | 357.1769 |
| DAVAT   | 430.2296 | 458.2245 | DAVATA  | 501.2667 | 529.2617 | DAVATAN  | 615.3097 | 643.3046 |
| AV      | 143.1179 | 171.1128 | AVA     | 214.1550 | 242.1499 | AVAT     | 315.2027 | 343.1976 |
| AVATA   | 386.2398 | 414.2347 | AVATAN  | 500.2827 | 528.2776 | AVATANI  | 613.3668 | 641.3617 |
| VA      | 143.1179 | 171.1128 | VAT     | 244.1656 | 272.1605 | VATA     | 315.2027 | 343.1976 |
| VATAN   | 429.2456 | 457.2405 | VATANI  | 542.3297 | 570.3246 | VATANIL  | 655.4137 | 683.4087 |
| AT      | 145.0972 | 173.0921 | ATA     | 216.1343 | 244.1292 | ATAN     | 330.1772 | 358.1721 |
| ATANI   | 443.2613 | 471.2562 | ATANIL  | 556.3453 | 584.3402 | ATANILE  | 685.3879 | 713.3828 |
| TA      | 145.0972 | 173.0921 | TAN     | 259.1401 | 287.1350 | TANI     | 372.2241 | 400.2191 |
| TANIL   | 485.3082 | 513.3031 | TANILE  | 614.3508 | 642.3457 | AN       | 158.0924 | 186.0873 |
| ANI     | 271.1765 | 299.1714 | ANIL    | 384.2605 | 412.2554 | ANILE    | 513.3031 | 541.2980 |
| ANILES  | 600.3352 | 628.3301 | ANILESS | 687.3672 | 715.3621 | NI       | 200.1394 | 228.1343 |
| NIL     | 313.2234 | 341.2183 | NILE    | 442.2660 | 470.2609 | NILES    | 529.2980 | 557.2930 |
| NILESS  | 616.3301 | 644.3250 | NILESSA | 687.3672 | 715.3621 | IL       | 199.1805 | 227.1754 |
| ILE     | 328.2231 | 356.2180 | ILES    | 415.2551 | 443.2500 | ILESS    | 502.2871 | 530.2821 |
| ILESSA  | 573.3243 | 601.3192 | ILESSAP | 670.3770 | 698.3719 | LE       | 215.1390 | 243.1339 |
| LES     | 302.1710 | 330.1660 | LESS    | 389.2031 | 417.1980 | LESSA    | 460.2402 | 488.2351 |
| LESSAP  | 557.2930 | 585.2879 | LESSAPV | 656.3614 | 684.3563 | ES       | 189.0870 | 217.0819 |
| ESS     | 276.1190 | 304.1139 | ESSA    | 347.1561 | 375.1510 | ESSAP    | 444.2089 | 472.2038 |
| ESSAPV  | 543.2773 | 571.2722 | ESSAPVV | 642.3457 | 670.3406 | ESSAPVVG | 699.3672 | 727.3621 |
| SS      | 147.0764 | 175.0713 | SSA     | 218.1135 | 246.1084 | SSAP     | 315.1663 | 343.1612 |
| SSAPV   | 414.2347 | 442.2296 | SSAPVV  | 513.3031 | 541.2980 | SSAPVVG  | 570.3246 | 598.3195 |
| SSAPVVG | 627.3461 | 655.3410 | SA      | 131.0815 | 159.0764 | SAP      | 228.1343 | 256.1292 |
| SAPV    | 327.2027 | 355.1976 | SAPVV   | 426.2711 | 454.2660 | SAPVVG   | 483.2926 | 511.2875 |
| SAPVVG  | 540.3140 | 568.3089 | AP      | 141.1022 | 169.0972 | APV      | 240.1707 | 268.1656 |
| APVV    | 339.2391 | 367.2340 | APVVG   | 396.2605 | 424.2554 | APVVG    | 453.2820 | 481.2769 |
| PV      | 169.1335 | 197.1285 | PVV     | 268.2020 | 296.1969 | PVVG     | 325.2234 | 353.2183 |
| PVVG    | 382.2449 | 410.2398 | VV      | 171.1492 | 199.1441 | VVG      | 228.1707 | 256.1656 |
| VVG     | 285.1921 | 313.1870 | VG      | 129.1022 | 157.0972 | VGG      | 186.1237 | 214.1186 |
| GG      | 87.0553  | 115.0502 |         |          |          |          |          |          |

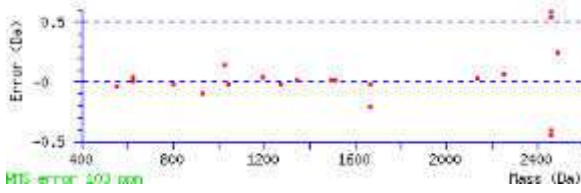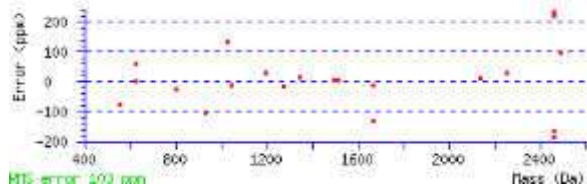

NCBI BLAST search of [TDSEGGFESDAVATANILESSAPVVGK](#)  
 (Parameters: blastp, nr protein database, expect=20000, no filter, PAM30)  
 Other BLAST [web gateways](#)

All matches to this query

| Score | M <sub>r</sub> (calc) | Delta   | Sequence                                    |
|-------|-----------------------|---------|---------------------------------------------|
| 50.7  | 2707.2825             | 0.3260  | <a href="#">TDSEGGFESDAVATANILESSAPVVGK</a> |
| 8.6   | 2708.0980             | -0.4896 | <a href="#">WGSDDGTMGERWGNDDGTMTEFSGGR</a>  |
| 8.0   | 2707.3925             | 0.2160  | <a href="#">LMTEAELAAMFRDVAIVDEVTVIR</a>    |
| 7.9   | 2707.3541             | 0.2544  | <a href="#">VAVNEGRGIFAVGEGGGVYALAOCWK</a>  |
| 5.2   | 2707.3970             | 0.2115  | <a href="#">AVLGWEPTPRVYVAAALGEAGADADPK</a> |
| 5.1   | 2707.3925             | 0.2160  | <a href="#">LMTEAELAAMFRDVAIVDEVTVIR</a>    |
| 4.8   | 2708.4095             | -0.8011 | <a href="#">VIMTLTRVILEGEFOESFPIDGAK</a>    |
| 4.6   | 2707.4466             | 0.1618  | <a href="#">QAMLEPLVDIVPEPNOIVTQTOLIK</a>   |
| 4.6   | 2707.4116             | 0.1969  | <a href="#">FNRRPSDGLNLLQVYGDGSM LVIK</a>   |
| 4.2   | 2707.6186             | -0.0102 | <a href="#">WELRVMVLLSLSLOILLILGNR</a>      |

Mascot: <http://www.matrixscience.com/>

**MATRIX SCIENCE Mascot Search Results**

**Peptide View Spot no 24**

MS/MS Fragmentation of **EFPGQVLR YEDNF D A N S N V S V I I N P T T K**

Found in **gi|115470529** in **NCBI nr**, Os07g0141400 [Oryza sativa Japonica Group]

Match to Query 46: 3166.926324 from(3167.933600,1+) intensity(0.0000) index(19)

Title: Label: B12, Spot\_Id: 216654, Peak\_List\_Id: 221705, MSMS Job\_Run\_Id: 21388, Comment:

Data file C:\Documents and Settings\Administrator\Desktop\farah BHU\Cotton leaves\RAJESH\12-1-13 raj\ppw\_B12\_136117695600.txt

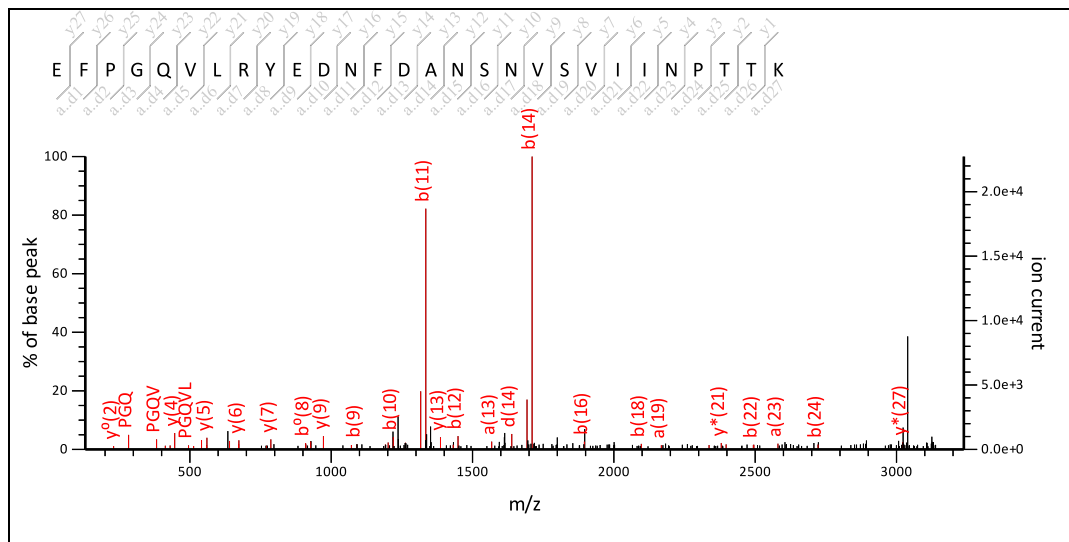

Navigation icons and search range: 130.1 to 3238.17

Label all possible matches  Label matches used for scoring

Monoisotopic mass of neutral peptide Mr(calc): 3166.5571

Fixed modifications: Carbamidomethyl (C) (apply to specified residues or termini only)

Ions Score: 45 Expect: 0.039

Matches : 51/567 fragment ions using 109 most intense peaks [\(help\)](#)

| #  | Immon.   | a         | a*        | a <sup>0</sup> | b         | b*        | b <sup>0</sup> | d         | d'        | Seq. | v         | w         | w'       | y         | y*        |
|----|----------|-----------|-----------|----------------|-----------|-----------|----------------|-----------|-----------|------|-----------|-----------|----------|-----------|-----------|
| 1  | 102.0550 | 102.0550  |           | 84.0444        | 130.0499  |           | 112.0393       | 44.0495   |           | E    |           |           |          |           |           |
| 2  | 120.0808 | 249.1234  |           | 231.1128       | 277.1183  |           | 259.1077       |           |           | F    | 2946.4592 |           |          | 3038.5218 | 3021.4952 |
| 3  | 70.0651  | 346.1761  |           | 328.1656       | 374.1710  |           | 356.1605       | 320.1605  |           | P    | 2849.4064 | 2848.4112 |          | 2891.4534 | 2874.4268 |
| 4  | 30.0338  | 403.1976  |           | 385.1870       | 431.1925  |           | 413.1819       |           |           | G    |           |           |          | 2794.4006 | 2777.3741 |
| 5  | 101.0709 | 531.2562  | 514.2296  | 513.2456       | 559.2511  | 542.2245  | 541.2405       | 474.2347  |           | Q    | 2664.3264 | 2663.3311 |          | 2737.3791 | 2720.3526 |
| 6  | 72.0808  | 630.3246  | 613.2980  | 612.3140       | 658.3195  | 641.2930  | 640.3089       | 616.3089  |           | V    | 2565.2580 | 2578.2784 |          | 2609.3206 | 2592.2940 |
| 7  | 86.0964  | 743.4087  | 726.3821  | 725.3981       | 771.4036  | 754.3770  | 753.3930       | 701.3617  |           | L    | 2452.1739 | 2451.1787 |          | 2510.2522 | 2493.2256 |
| 8  | 129.1135 | 899.5098  | 882.4832  | 881.4992       | 927.5047  | 910.4781  | 909.4941       | 814.4458  |           | R    | 2296.0728 | 2295.0775 |          | 2397.1681 | 2380.1415 |
| 9  | 136.0757 | 1062.5731 | 1045.5465 | 1044.5625      | 1090.5680 | 1073.5415 | 1072.5574      |           |           | Y    | 2133.0095 |           |          | 2241.0670 | 2224.0404 |
| 10 | 102.0550 | 1191.6157 | 1174.5891 | 1173.6051      | 1219.6106 | 1202.5841 | 1201.6000      | 1133.6102 |           | E    | 2003.9669 | 2002.9716 |          | 2078.0037 | 2060.9771 |
| 11 | 88.0393  | 1306.6426 | 1289.6161 | 1288.6321      | 1334.6375 | 1317.6110 | 1316.6270      | 1262.6528 |           | D    | 1888.9399 | 1887.9447 |          | 1948.9611 | 1931.9345 |
| 12 | 87.0553  | 1420.6856 | 1403.6590 | 1402.6750      | 1448.6805 | 1431.6539 | 1430.6699      | 1377.6797 |           | N    | 1774.8970 | 1773.9018 |          | 1833.9341 | 1816.9076 |
| 13 | 120.0808 | 1567.7540 | 1550.7274 | 1549.7434      | 1595.7489 | 1578.7223 | 1577.7383      |           |           | F    | 1627.8286 |           |          | 1719.8912 | 1702.8646 |
| 14 | 88.0393  | 1682.7809 | 1665.7544 | 1664.7703      | 1710.7758 | 1693.7493 | 1692.7653      | 1638.7911 |           | D    | 1512.8016 | 1511.8064 |          | 1572.8228 | 1555.7962 |
| 15 | 44.0495  | 1753.8180 | 1736.7915 | 1735.8075      | 1781.8129 | 1764.7864 | 1763.8024      |           |           | A    | 1441.7645 |           |          | 1457.7958 | 1440.7693 |
| 16 | 87.0553  | 1867.8610 | 1850.8344 | 1849.8504      | 1895.8559 | 1878.8293 | 1877.8453      | 1824.8551 |           | N    | 1327.7216 | 1326.7264 |          | 1386.7587 | 1369.7322 |
| 17 | 60.0444  | 1954.8930 | 1937.8664 | 1936.8824      | 1982.8879 | 1965.8613 | 1964.8773      | 1938.8981 |           | S    | 1240.6896 | 1239.6943 |          | 1272.7158 | 1255.6892 |
| 18 | 87.0553  | 2068.9359 | 2051.9094 | 2050.9253      | 2096.9308 | 2079.9043 | 2078.9203      | 2025.9301 |           | N    | 1126.6467 | 1125.6514 |          | 1185.6838 | 1168.6572 |
| 19 | 72.0808  | 2168.0043 | 2150.9778 | 2149.9938      | 2195.9992 | 2178.9727 | 2177.9887      | 2153.9887 |           | V    | 1027.5782 | 1040.5986 |          | 1071.6408 | 1054.6143 |
| 20 | 60.0444  | 2255.0363 | 2238.0098 | 2237.0258      | 2283.0313 | 2266.0047 | 2265.0207      | 2239.0414 |           | S    | 940.5462  | 939.5510  |          | 972.5724  | 955.5459  |
| 21 | 72.0808  | 2354.1048 | 2337.0782 | 2336.0942      | 2382.0997 | 2365.0731 | 2364.0891      | 2340.0891 |           | V    | 841.4778  | 854.4982  |          | 885.5404  | 868.5138  |
| 22 | 86.0964  | 2467.1888 | 2450.1623 | 2449.1783      | 2495.1837 | 2478.1572 | 2477.1732      | 2439.1575 | 2453.1732 | I    | 728.3937  | 741.4141  | 755.4298 | 786.4720  | 769.4454  |
| 23 | 86.0964  | 2580.2729 | 2563.2463 | 2562.2623      | 2608.2678 | 2591.2413 | 2590.2572      | 2552.2416 | 2566.2572 | I    | 615.3097  | 628.3301  | 642.3457 | 673.3879  | 656.3614  |



|    |          |           |           |           |                  |           |           |           |           |   |          |          |          |                 |          |    |
|----|----------|-----------|-----------|-----------|------------------|-----------|-----------|-----------|-----------|---|----------|----------|----------|-----------------|----------|----|
| 24 | 87.0553  | 2694.3158 | 2677.2893 | 2676.3053 | <b>2722.3107</b> | 2705.2842 | 2704.3002 | 2651.3100 |           | N | 501.2667 | 500.2715 |          | <b>560.3039</b> | 543.2773 | 54 |
| 25 | 70.0651  | 2791.3686 | 2774.3420 | 2773.3580 | 2819.3635        | 2802.3369 | 2801.3529 | 2765.3529 |           | P | 404.2140 | 403.2187 |          | <b>446.2609</b> | 429.2344 | 42 |
| 26 | 74.0600  | 2892.4163 | 2875.3897 | 2874.4057 | 2920.4112        | 2903.3846 | 2902.4006 | 2876.4213 | 2878.4006 | T | 303.1663 | 316.1867 | 318.1660 | 349.2082        | 332.1816 | 33 |
| 27 | 74.0600  | 2993.4639 | 2976.4374 | 2975.4534 | <b>3021.4589</b> | 3004.4323 | 3003.4483 | 2977.4690 | 2979.4483 | T | 202.1186 | 215.1390 | 217.1183 | 248.1605        | 231.1339 | 23 |
| 28 | 101.1073 |           |           |           |                  |           |           |           |           | K | 74.0237  | 73.0284  |          | 147.1128        | 130.0863 |    |

| Seq     | ya       | yb              | Seq    | ya       | yb              | Seq     | ya       | yb              |
|---------|----------|-----------------|--------|----------|-----------------|---------|----------|-----------------|
| FP      | 217.1335 | 245.1285        | FPG    | 274.1550 | 302.1499        | FPGQ    | 402.2136 | <b>430.2085</b> |
| FPGQV   | 501.2820 | 529.2769        | FPGQVL | 614.3661 | 642.3610        | PG      | 127.0866 | 155.0815        |
| PGQ     | 255.1452 | <b>283.1401</b> | PGQV   | 354.2136 | <b>382.2085</b> | PGQVL   | 467.2976 | <b>495.2926</b> |
| PGQVLR  | 623.3988 | 651.3937        | GQ     | 158.0924 | 186.0873        | GQV     | 257.1608 | 285.1557        |
| GQVL    | 370.2449 | 398.2398        | GQVLR  | 526.3460 | 554.3409        | GQVLRV  | 689.4093 | 717.4042        |
| QV      | 200.1394 | 228.1343        | QVL    | 313.2234 | 341.2183        | QVLR    | 469.3245 | 497.3194        |
| QVLRV   | 632.3879 | 660.3828        | VL     | 185.1648 | 213.1598        | VLR     | 341.2659 | 369.2609        |
| VLRV    | 504.3293 | 532.3242        | VLRVE  | 633.3719 | 661.3668        | LR      | 242.1975 | 270.1925        |
| LRV     | 405.2609 | 433.2558        | LRYE   | 534.3035 | 562.2984        | LRYED   | 649.3304 | 677.3253        |
| RV      | 292.1768 | 320.1717        | RYE    | 421.2194 | 449.2143        | RYED    | 536.2463 | 564.2413        |
| RYEDN   | 650.2893 | 678.2842        | YE     | 265.1183 | 293.1132        | YED     | 380.1452 | 408.1401        |
| YEDN    | 494.1882 | 522.1831        | YEDNF  | 641.2566 | 669.2515        | ED      | 217.0819 | 245.0768        |
| EDN     | 331.1248 | 359.1197        | EDNF   | 478.1932 | 506.1882        | EDNFD   | 593.2202 | 621.2151        |
| EDNFDA  | 664.2573 | 692.2522        | DN     | 202.0822 | <b>230.0771</b> | DNF     | 349.1506 | 377.1456        |
| DNFD    | 464.1776 | 492.1725        | DNFDA  | 535.2147 | 563.2096        | DNFDAN  | 649.2576 | 677.2525        |
| NF      | 234.1237 | 262.1186        | NFD    | 349.1506 | 377.1456        | NFDA    | 420.1878 | 448.1827        |
| NFDAN   | 534.2307 | 562.2256        | NFDANS | 621.2627 | 649.2576        | FD      | 235.1077 | 263.1026        |
| FDA     | 306.1448 | 334.1397        | FDAN   | 420.1878 | 448.1827        | FDANS   | 507.2198 | 535.2147        |
| FDANSN  | 621.2627 | 649.2576        | DA     | 159.0764 | 187.0713        | DAN     | 273.1193 | 301.1143        |
| DANS    | 360.1514 | 388.1463        | DANSN  | 474.1943 | 502.1892        | DANSNV  | 573.2627 | 601.2576        |
| DANSNVS | 660.2947 | 688.2897        | AN     | 158.0924 | 186.0873        | ANS     | 245.1244 | 273.1193        |
| ANSN    | 359.1674 | 387.1623        | ANSNV  | 458.2358 | 486.2307        | ANSNVS  | 545.2678 | 573.2627        |
| ANSNVSV | 644.3362 | <b>672.3311</b> | NS     | 174.0873 | 202.0822        | NSN     | 288.1302 | 316.1252        |
| NSNV    | 387.1987 | 415.1936        | NSNVS  | 474.2307 | 502.2256        | NSNVSV  | 573.2991 | 601.2940        |
| NSNVSVI | 686.3832 | 714.3781        | SN     | 174.0873 | 202.0822        | SNV     | 273.1557 | 301.1506        |
| SNVS    | 360.1878 | 388.1827        | SNVSV  | 459.2562 | 487.2511        | SNVSVI  | 572.3402 | 600.3352        |
| SNVSVII | 685.4243 | 713.4192        | NV     | 186.1237 | 214.1186        | NVS     | 273.1557 | 301.1506        |
| NVSV    | 372.2241 | 400.2191        | NVSVI  | 485.3082 | <b>513.3031</b> | NVSVII  | 598.3923 | 626.3872        |
| VS      | 159.1128 | 187.1077        | VSV    | 258.1812 | 286.1761        | VSVI    | 371.2653 | 399.2602        |
| VSVII   | 484.3493 | 512.3443        | VSVIIN | 598.3923 | 626.3872        | VSVIINP | 695.4450 | 723.4400        |
| SV      | 159.1128 | 187.1077        | SVI    | 272.1969 | 300.1918        | SVII    | 385.2809 | <b>413.2758</b> |
| SVIIN   | 499.3239 | 527.3188        | SVIINP | 596.3766 | 624.3715        | SVIINPT | 697.4243 | 725.4192        |
| VI      | 185.1648 | 213.1598        | VII    | 298.2489 | 326.2438        | VIIN    | 412.2918 | 440.2867        |
| VIINP   | 509.3446 | 537.3395        | VIINPT | 610.3923 | 638.3872        | II      | 199.1805 | 227.1754        |
| IIN     | 313.2234 | 341.2183        | IINP   | 410.2762 | 438.2711        | IINPT   | 511.3239 | 539.3188        |
| IINPTT  | 612.3715 | <b>640.3665</b> | IN     | 200.1394 | 228.1343        | INP     | 297.1921 | 325.1870        |
| INPT    | 398.2398 | 426.2347        | INPTT  | 499.2875 | 527.2824        | NP      | 184.1081 | 212.1030        |
| NPT     | 285.1557 | 313.1506        | NPTT   | 386.2034 | 414.1983        | PT      | 171.1128 | 199.1077        |
| PTT     | 272.1605 | 300.1554        | TT     | 175.1077 | 203.1026        |         |          |                 |

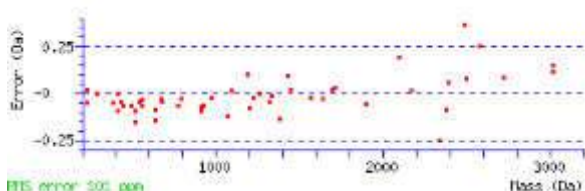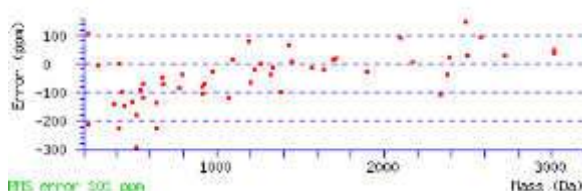

NCBI BLAST search of [EFPGQVLRVEDNFEDANSNVSVIINPTTK](#)  
 (Parameters: blastp, nr protein database, expect=20000, no filter, PAM30)  
 Other BLAST [web gateways](#)

## All matches to this query

| Score | Mr(calc)  | Delta   | Sequence                                      |
|-------|-----------|---------|-----------------------------------------------|
| 45.5  | 3166.5571 | 0.3692  | <a href="#">EFPGQVLRVEDNFDANSNVSVIINPTTK</a>  |
| 39.2  | 3166.5571 | 0.3692  | <a href="#">EFPGQVLRVEDNFDANSNVSVIIOPTSK</a>  |
| 32.5  | 3167.5775 | -0.6512 | <a href="#">EFPGQVLRVEDNFDATSNLSVIINPTTK</a>  |
| 5.4   | 3167.4005 | -0.4742 | <a href="#">VSSHLESGFMPDYVYSYMHGEEQLGK</a>    |
| 5.4   | 3166.6849 | 0.2414  | <a href="#">WIQDEGEIAVGNMSAVDKPNILPLLATVR</a> |
| 3.9   | 3167.5333 | -0.6069 | <a href="#">SVVAPPPTDDTRDEGTPGYMAPELLLGEK</a> |
| 3.8   | 3167.4630 | -0.5366 | <a href="#">EIASNEKPSDPEEKPSDPTEKPSDPKDTT</a> |
| 1.5   | 3166.4165 | 0.5099  | <a href="#">SDONAAARAVDPMFGWFMGPLTEGEYPK</a>  |
| 1.1   | 3166.6056 | 0.3207  | <a href="#">WRTAVTVAGDNASPMMLWAVEVYPPKPGR</a> |
| 0.7   | 3166.4403 | 0.4860  | <a href="#">GASEIIVQCDMMIDGDGNSVPLSEAQRK</a>  |

Mascot: <http://www.matrixscience.com/>



**MATRIX SCIENCE Mascot Search Results**

**Peptide View Spot no 24**

MS/MS Fragmentation of **QAYSGKTDSEGGFESDAVATANILESSAPVVGK**

Found in **gi|115470529** in **NCBI nr**, Os07g0141400 [Oryza sativa Japonica Group]

Match to Query 50: 3342.033224 from(3343.040500,1+) intensity(0.0000) index(21)

Title: Label: B12, Spot\_Id: 216654, Peak\_List\_Id: 221714, MSMS Job\_Run\_Id: 21388, Comment:

Data file C:\Documents and Settings\Administrator\Desktop\farah BHU\Cotton leaves\RAJESH\12-1-13 raj\ppw\_B12\_136117695600.txt

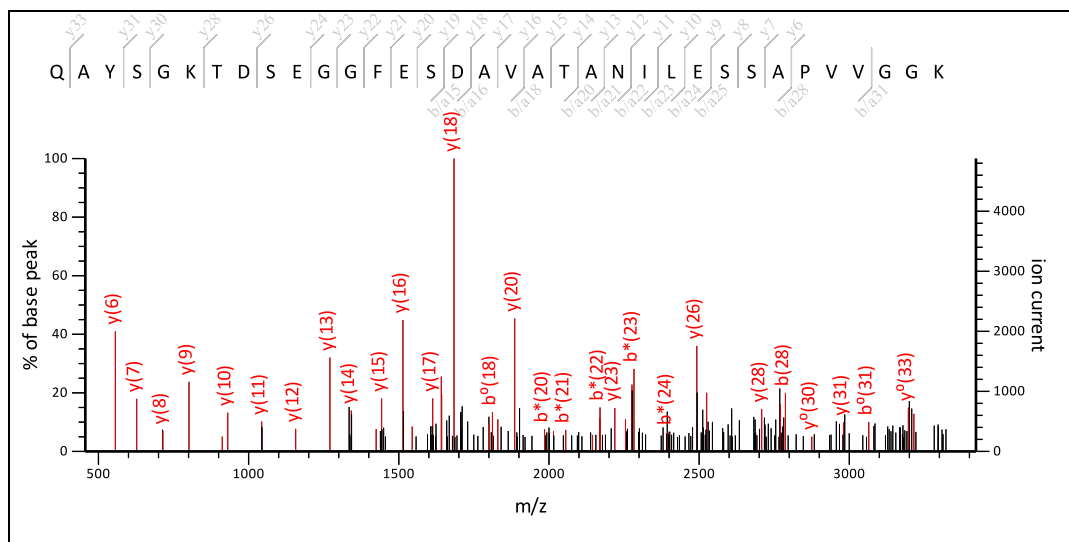

Navigation icons: Home, Back, Forward, Search, and a zoom slider set to 456.31 to 3421.71.

Label all possible matches  Label matches used for scoring

Monoisotopic mass of neutral peptide Mr(calc): 3341.5899

Fixed modifications: Carbamidomethyl (C) (apply to specified residues or termini only)

Ions Score: 115 Expect: 3.5e-09

Matches : 46/726 fragment ions using 93 most intense peaks [\(help\)](#)

| #  | Immon.   | a         | a*        | a <sup>0</sup> | b         | b*        | b <sup>0</sup> | d         | d'        | Seq. | v         | w         | w'        | y         | y*           |
|----|----------|-----------|-----------|----------------|-----------|-----------|----------------|-----------|-----------|------|-----------|-----------|-----------|-----------|--------------|
| 1  | 101.0709 | 101.0709  | 84.0444   |                | 129.0659  | 112.0393  |                | 44.0495   |           | Q    |           |           |           |           |              |
| 2  | 44.0495  | 172.1081  | 155.0815  |                | 200.1030  | 183.0764  |                |           |           | A    | 3198.5073 |           |           | 3214.5386 | 3197.5121 31 |
| 3  | 136.0757 | 335.1714  | 318.1448  |                | 363.1663  | 346.1397  |                |           |           | Y    | 3035.4440 |           |           | 3143.5015 | 3126.4750 31 |
| 4  | 60.0444  | 422.2034  | 405.1769  | 404.1928       | 450.1983  | 433.1718  | 432.1878       | 406.2085  |           | S    | 2948.4120 | 2947.4167 |           | 2980.4382 | 2963.4116 29 |
| 5  | 30.0338  | 479.2249  | 462.1983  | 461.2143       | 507.2198  | 490.1932  | 489.2092       |           |           | G    |           |           |           | 2893.4062 | 2876.3796 28 |
| 6  | 101.1073 | 607.3198  | 590.2933  | 589.3093       | 635.3148  | 618.2882  | 617.3042       | 550.2620  |           | K    | 2763.2955 | 2762.3003 |           | 2836.3847 | 2819.3581 28 |
| 7  | 74.0600  | 708.3675  | 691.3410  | 690.3570       | 736.3624  | 719.3359  | 718.3519       | 692.3726  | 694.3519  | T    | 2662.2479 | 2675.2683 | 2677.2475 | 2708.2897 | 2691.2632 26 |
| 8  | 88.0393  | 823.3945  | 806.3679  | 805.3839       | 851.3894  | 834.3628  | 833.3788       | 779.4046  |           | D    | 2547.2209 | 2546.2257 |           | 2607.2420 | 2590.2155 25 |
| 9  | 60.0444  | 910.4265  | 893.3999  | 892.4159       | 938.4214  | 921.3949  | 920.4108       | 894.4316  |           | S    | 2460.1889 | 2459.1936 |           | 2492.2151 | 2475.1886 24 |
| 10 | 102.0550 | 1039.4691 | 1022.4425 | 1021.4585      | 1067.4640 | 1050.4374 | 1049.4534      | 981.4636  |           | E    | 2331.1463 | 2330.1510 |           | 2405.1831 | 2388.1565 23 |
| 11 | 30.0338  | 1096.4905 | 1079.4640 | 1078.4800      | 1124.4855 | 1107.4589 | 1106.4749      |           |           | G    |           |           |           | 2276.1405 | 2259.1139 22 |
| 12 | 30.0338  | 1153.5120 | 1136.4855 | 1135.5014      | 1181.5069 | 1164.4804 | 1163.4964      |           |           | G    |           |           |           | 2219.1190 | 2202.0925 22 |
| 13 | 120.0808 | 1300.5804 | 1283.5539 | 1282.5699      | 1328.5753 | 1311.5488 | 1310.5648      |           |           | F    | 2070.0350 |           |           | 2162.0976 | 2145.0710 21 |
| 14 | 102.0550 | 1429.6230 | 1412.5965 | 1411.6124      | 1457.6179 | 1440.5914 | 1439.6074      | 1371.6175 |           | E    | 1940.9924 | 1939.9971 |           | 2015.0291 | 1998.0026 19 |
| 15 | 60.0444  | 1516.6550 | 1499.6285 | 1498.6445      | 1544.6500 | 1527.6234 | 1526.6394      | 1500.6601 |           | S    | 1853.9603 | 1852.9651 |           | 1885.9865 | 1868.9600 18 |
| 16 | 88.0393  | 1631.6820 | 1614.6554 | 1613.6714      | 1659.6769 | 1642.6504 | 1641.6663      | 1587.6922 |           | D    | 1738.9334 | 1737.9381 |           | 1798.9545 | 1781.9280 17 |
| 17 | 44.0495  | 1702.7191 | 1685.6926 | 1684.7085      | 1730.7140 | 1713.6875 | 1712.7034      |           |           | A    | 1667.8963 |           |           | 1683.9276 | 1666.9010 16 |
| 18 | 72.0808  | 1801.7875 | 1784.7610 | 1783.7769      | 1829.7824 | 1812.7559 | 1811.7719      | 1787.7719 |           | V    | 1568.8279 | 1581.8483 |           | 1612.8905 | 1595.8639 15 |
| 19 | 44.0495  | 1872.8246 | 1855.7981 | 1854.8141      | 1900.8195 | 1883.7930 | 1882.8090      |           |           | A    | 1497.7907 |           |           | 1513.8220 | 1496.7955 14 |
| 20 | 74.0600  | 1973.8723 | 1956.8458 | 1955.8617      | 2001.8672 | 1984.8407 | 1983.8567      | 1957.8774 | 1959.8567 | T    | 1396.7431 | 1409.7635 | 1411.7427 | 1442.7849 | 1425.7584 14 |
| 21 | 44.0495  | 2044.9094 | 2027.8829 | 2026.8989      | 2072.9043 | 2055.8778 | 2054.8938      |           |           | A    | 1325.7060 |           |           | 1341.7373 | 1324.7107 13 |
| 22 | 87.0553  | 2158.9523 | 2141.9258 | 2140.9418      | 2186.9473 | 2169.9207 | 2168.9367      | 2115.9465 |           | N    | 1211.6630 | 1210.6678 |           | 1270.7001 | 1253.6736 12 |
| 23 | 86.0964  | 2272.0364 | 2255.0099 | 2254.0258      | 2300.0313 | 2283.0048 | 2282.0208      | 2244.0051 | 2258.0208 | I    | 1098.5790 | 1111.5994 | 1125.6150 | 1156.6572 | 1139.6307 11 |

|    |          |           |           |           |           |           |           |           |  |   |          |          |  |           |           |
|----|----------|-----------|-----------|-----------|-----------|-----------|-----------|-----------|--|---|----------|----------|--|-----------|-----------|
| 24 | 86.0964  | 2385.1205 | 2368.0939 | 2367.1099 | 2413.1154 | 2396.0888 | 2395.1048 | 2343.0735 |  | L | 985.4949 | 984.4997 |  | 1043.5732 | 1026.5466 |
| 25 | 102.0550 | 2514.1631 | 2497.1365 | 2496.1525 | 2542.1580 | 2525.1314 | 2524.1474 | 2456.1576 |  | E | 856.4523 | 855.4571 |  | 930.4891  | 913.4625  |
| 26 | 60.0444  | 2601.1951 | 2584.1685 | 2583.1845 | 2629.1900 | 2612.1635 | 2611.1794 | 2585.2002 |  | S | 769.4203 | 768.4250 |  | 801.4465  | 784.4199  |
| 27 | 60.0444  | 2688.2271 | 2671.2006 | 2670.2166 | 2716.2220 | 2699.1955 | 2698.2115 | 2672.2322 |  | S | 682.3883 | 681.3930 |  | 714.4145  | 697.3879  |
| 28 | 44.0495  | 2759.2642 | 2742.2377 | 2741.2537 | 2787.2592 | 2770.2326 | 2769.2486 |           |  | A | 611.3511 |          |  | 627.3824  | 610.3559  |
| 29 | 70.0651  | 2856.3170 | 2839.2905 | 2838.3064 | 2884.3119 | 2867.2854 | 2866.3014 | 2830.3014 |  | P | 514.2984 | 513.3031 |  | 556.3453  | 539.3188  |
| 30 | 72.0808  | 2955.3854 | 2938.3589 | 2937.3749 | 2983.3803 | 2966.3538 | 2965.3698 | 2941.3698 |  | V | 415.2300 | 428.2504 |  | 459.2926  | 442.2660  |
| 31 | 72.0808  | 3054.4538 | 3037.4273 | 3036.4433 | 3082.4487 | 3065.4222 | 3064.4382 | 3040.4382 |  | V | 316.1615 | 329.1819 |  | 360.2241  | 343.1976  |
| 32 | 30.0338  | 3111.4753 | 3094.4487 | 3093.4647 | 3139.4702 | 3122.4437 | 3121.4596 |           |  | G |          |          |  | 261.1557  | 244.1292  |
| 33 | 30.0338  | 3168.4968 | 3151.4702 | 3150.4862 | 3196.4917 | 3179.4651 | 3178.4811 |           |  | G |          |          |  | 204.1343  | 187.1077  |
| 34 | 101.1073 |           |           |           |           |           |           |           |  | K | 74.0237  | 73.0284  |  | 147.1128  | 130.0863  |

| Seq     | ya       | yb       | Seq     | ya       | yb       | Seq     | ya       | yb       |
|---------|----------|----------|---------|----------|----------|---------|----------|----------|
| AY      | 207.1128 | 235.1077 | AYS     | 294.1448 | 322.1397 | AYSG    | 351.1663 | 379.1612 |
| AYSGK   | 479.2613 | 507.2562 | AYSGKT  | 580.3089 | 608.3039 | AYSGKTD | 695.3359 | 723.3308 |
| YS      | 223.1077 | 251.1026 | YSG     | 280.1292 | 308.1241 | YSGK    | 408.2241 | 436.2191 |
| YSGKT   | 509.2718 | 537.2667 | YSGKTD  | 624.2988 | 652.2937 | SG      | 117.0659 | 145.0608 |
| SGK     | 245.1608 | 273.1557 | SGKT    | 346.2085 | 374.2034 | SGKTD   | 461.2354 | 489.2304 |
| SGKTDS  | 548.2675 | 576.2624 | SGKTDS  | 677.3101 | 705.3050 | GK      | 158.1288 | 186.1237 |
| GKT     | 259.1765 | 287.1714 | GKTD    | 374.2034 | 402.1983 | GKTDS   | 461.2354 | 489.2304 |
| GKTDS   | 590.2780 | 618.2729 | GKTDS   | 647.2995 | 675.2944 | KT      | 202.1550 | 230.1499 |
| GKTDS   | 590.2780 | 618.2729 | GKTDS   | 647.2995 | 675.2944 | KT      | 202.1550 | 230.1499 |
| KTD     | 317.1819 | 345.1769 | KTDS    | 404.2140 | 432.2089 | KTDSE   | 533.2566 | 561.2515 |
| KTDSE   | 590.2780 | 618.2729 | KTDSEGG | 647.2995 | 675.2944 | TD      | 189.0870 | 217.0819 |
| TDS     | 276.1190 | 304.1139 | TDSE    | 405.1616 | 433.1565 | TDSEGG  | 462.1831 | 490.1780 |
| TDSEGG  | 519.2045 | 547.1994 | TDSEGGF | 666.2729 | 694.2679 | DS      | 175.0713 | 203.0662 |
| DSE     | 304.1139 | 332.1088 | DSEG    | 361.1354 | 389.1303 | DSEGG   | 418.1569 | 446.1518 |
| DSEGG   | 565.2253 | 593.2202 | DSEGGF  | 694.2679 | 722.2628 | SE      | 189.0870 | 217.0819 |
| SEG     | 246.1084 | 274.1034 | SEGG    | 303.1299 | 331.1248 | SEGGF   | 450.1983 | 478.1932 |
| SEGGF   | 579.2409 | 607.2358 | SEGGFES | 666.2729 | 694.2679 | EG      | 159.0764 | 187.0713 |
| EGG     | 216.0979 | 244.0928 | EGGF    | 363.1663 | 391.1612 | EGGFES  | 492.2089 | 520.2038 |
| EGGFES  | 579.2409 | 607.2358 | EGGFESD | 694.2679 | 722.2628 | GG      | 87.0553  | 115.0502 |
| GGF     | 234.1237 | 262.1186 | GGFE    | 363.1663 | 391.1612 | GGFES   | 450.1983 | 478.1932 |
| GGFES   | 565.2253 | 593.2202 | GGFESDA | 636.2624 | 664.2573 | GF      | 177.1022 | 205.0972 |
| GFE     | 306.1448 | 334.1397 | GFES    | 393.1769 | 421.1718 | GFESD   | 508.2038 | 536.1987 |
| GFESDA  | 579.2409 | 607.2358 | GFESDAV | 678.3093 | 706.3042 | FE      | 249.1234 | 277.1183 |
| FES     | 336.1554 | 364.1503 | FESD    | 451.1823 | 479.1773 | FESDA   | 522.2195 | 550.2144 |
| FESDAV  | 621.2879 | 649.2828 | FESDAV  | 692.3250 | 720.3199 | ES      | 189.0870 | 217.0819 |
| ESD     | 304.1139 | 332.1088 | ESDA    | 375.1510 | 403.1460 | ESDAV   | 474.2195 | 502.2144 |
| ESDAV   | 545.2566 | 573.2515 | ESDAVAT | 646.3042 | 674.2992 | SD      | 175.0713 | 203.0662 |
| SDA     | 246.1084 | 274.1034 | SDAV    | 345.1769 | 373.1718 | SDAV    | 416.2140 | 444.2089 |
| SDAVAT  | 517.2617 | 545.2566 | SDAVATA | 588.2988 | 616.2937 | DA      | 159.0764 | 187.0713 |
| DAV     | 258.1448 | 286.1397 | DAVA    | 329.1819 | 357.1769 | DAVAT   | 430.2296 | 458.2245 |
| DAVATA  | 501.2667 | 529.2617 | DAVATAN | 615.3097 | 643.3046 | AV      | 143.1179 | 171.1128 |
| AVA     | 214.1550 | 242.1499 | AVAT    | 315.2027 | 343.1976 | AVATA   | 386.2398 | 414.2347 |
| AVATAN  | 500.2827 | 528.2776 | AVATANI | 613.3668 | 641.3617 | VA      | 143.1179 | 171.1128 |
| VAT     | 244.1656 | 272.1605 | VATA    | 315.2027 | 343.1976 | VATAN   | 429.2456 | 457.2405 |
| VATANI  | 542.3297 | 570.3246 | VATANIL | 655.4137 | 683.4087 | AT      | 145.0972 | 173.0921 |
| ATA     | 216.1343 | 244.1292 | ATAN    | 330.1772 | 358.1721 | ATANI   | 443.2613 | 471.2562 |
| ATANIL  | 556.3453 | 584.3402 | ATANILE | 685.3879 | 713.3828 | TA      | 145.0972 | 173.0921 |
| TAN     | 259.1401 | 287.1350 | TANI    | 372.2241 | 400.2191 | TANIL   | 485.3082 | 513.3031 |
| TANILE  | 614.3508 | 642.3457 | AN      | 158.0924 | 186.0873 | ANI     | 271.1765 | 299.1714 |
| ANIL    | 384.2605 | 412.2554 | ANILE   | 513.3031 | 541.2980 | ANILES  | 600.3352 | 628.3301 |
| ANILESS | 687.3672 | 715.3621 | NI      | 200.1394 | 228.1343 | NIL     | 313.2234 | 341.2183 |
| NILE    | 442.2660 | 470.2609 | NILES   | 529.2980 | 557.2930 | NILESS  | 616.3301 | 644.3250 |
| NILESSA | 687.3672 | 715.3621 | IL      | 199.1805 | 227.1754 | ILE     | 328.2231 | 356.2180 |

|         |          |          |          |          |          |          |          |          |
|---------|----------|----------|----------|----------|----------|----------|----------|----------|
| ILES    | 415.2551 | 443.2500 | ILESS    | 502.2871 | 530.2821 | ILESSA   | 573.3243 | 601.3192 |
| ILESSAP | 670.3770 | 698.3719 | LE       | 215.1390 | 243.1339 | LES      | 302.1710 | 330.1660 |
| LESS    | 389.2031 | 417.1980 | LESSA    | 460.2402 | 488.2351 | LESSAP   | 557.2930 | 585.2879 |
| LESSAPV | 656.3614 | 684.3563 | ES       | 189.0870 | 217.0819 | ESS      | 276.1190 | 304.1139 |
| ESSA    | 347.1561 | 375.1510 | ESSAP    | 444.2089 | 472.2038 | ESSAPV   | 543.2773 | 571.2722 |
| ESSAPVV | 642.3457 | 670.3406 | ESSAPVVG | 699.3672 | 727.3621 | SS       | 147.0764 | 175.0713 |
| SSA     | 218.1135 | 246.1084 | SSAP     | 315.1663 | 343.1612 | SSAPV    | 414.2347 | 442.2296 |
| SSAPVV  | 513.3031 | 541.2980 | SSAPVVG  | 570.3246 | 598.3195 | SSAPVVGG | 627.3461 | 655.3410 |
| SA      | 131.0815 | 159.0764 | SAP      | 228.1343 | 256.1292 | SAPV     | 327.2027 | 355.1976 |
| SAPVV   | 426.2711 | 454.2660 | SAPVVG   | 483.2926 | 511.2875 | SAPVVGG  | 540.3140 | 568.3089 |
| AP      | 141.1022 | 169.0972 | APV      | 240.1707 | 268.1656 | APVV     | 339.2391 | 367.2340 |
| APVVG   | 396.2605 | 424.2554 | APVVGG   | 453.2820 | 481.2769 | PV       | 169.1335 | 197.1285 |
| PVV     | 268.2020 | 296.1969 | PVVG     | 325.2234 | 353.2183 | PVVGG    | 382.2449 | 410.2398 |
| VV      | 171.1492 | 199.1441 | VVG      | 228.1707 | 256.1656 | VVGG     | 285.1921 | 313.1870 |
| VG      | 129.1022 | 157.0972 | VGG      | 186.1237 | 214.1186 | GG       | 87.0553  | 115.0502 |

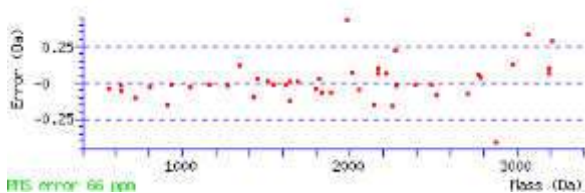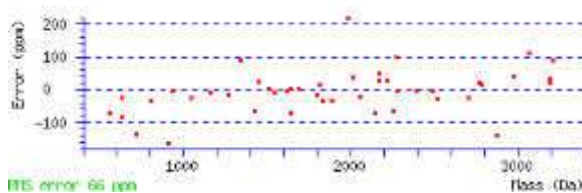

NCBI BLAST search of [QAYS GKTDSEGGFESDAVATANILESSAPVVGGK](#)

(Parameters: blastp, nr protein database, expect=20000, no filter, PAM30)

Other BLAST [web gateways](#)

#### All matches to this query

| Score | Mr(calc)  | Delta   | Sequence                                            |
|-------|-----------|---------|-----------------------------------------------------|
| 115.4 | 3341.5899 | 0.4433  | <a href="#">QAYS GKTDSEGGFESDAVATANILESSAPVVGGK</a> |
| 1.7   | 3342.6112 | -0.5780 | <a href="#">KACSEPIVPTNDANVVGAMPTYLSSFSLSGVK</a>    |
| 1.2   | 3342.4301 | -0.3969 | <a href="#">INMETEVLELFNHAEDNMEKGMDMWER</a>         |
| 1.2   | 3341.7383 | 0.2949  | <a href="#">DYLVKPAOMWWPQNLVQVSLFRTLHEK</a>         |
| 0.0   | 3341.4704 | 0.5628  | <a href="#">DEIQARTDNAVGTGYGMSPEYAMDGVISEK</a>      |

Mascot: <http://www.matrixscience.com/>



# Mascot Search Results

## Peptide View **Spot no 28**

MS/MS Fragmentation of **FFVGGNWK**

Found in **gi|553107** in **NCBI nr**, triosephosphate isomerase, partial [Oryza sativa Japonica Group]

Match to Query 7: 953.494984 from(954.502260,1+) intensity(0.0000) index(1)

Title: Label: J9, Spot\_Id: 219811, Peak\_List\_Id: 226895, MSMS Job\_Run\_Id: 21859, Comment:

Data file C:\Documents and Settings\Administrator\Desktop\Farah-Garima 11May 2013\ppw\_J9\_136859946600.txt

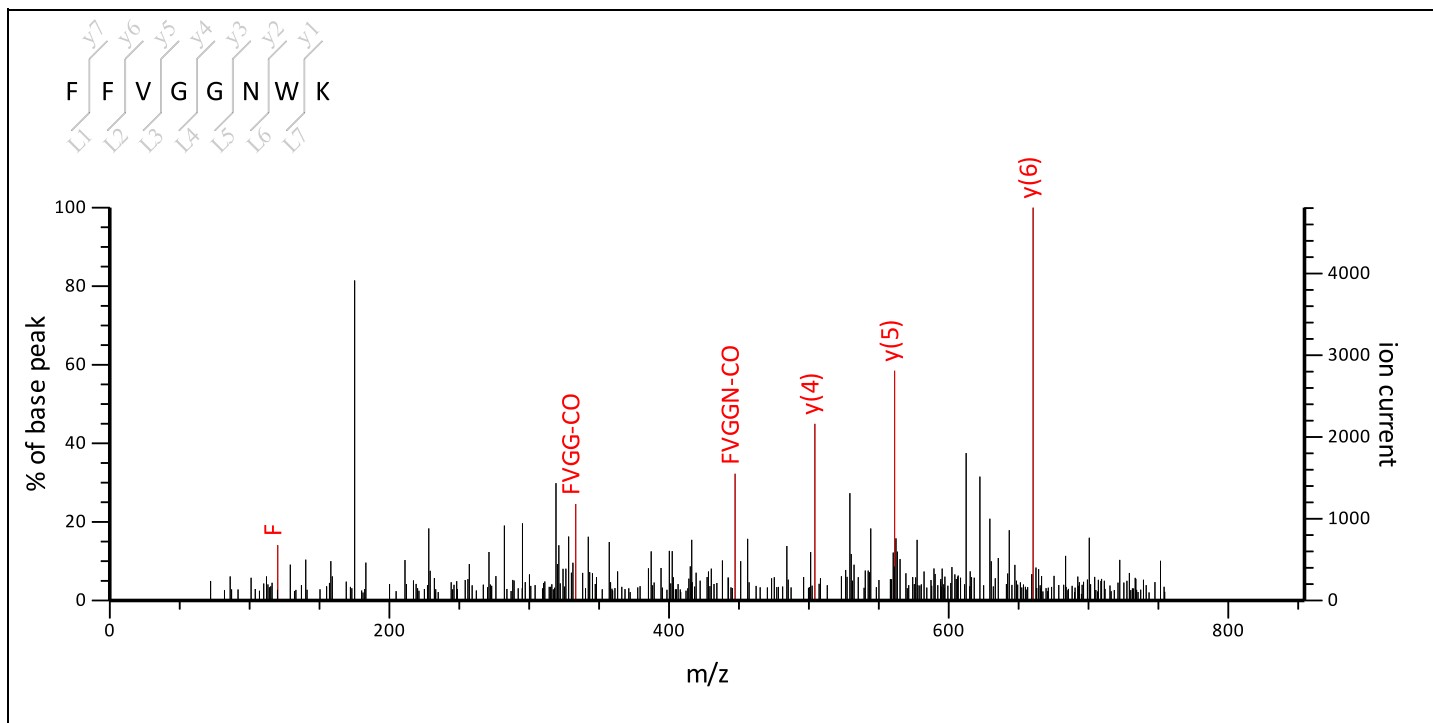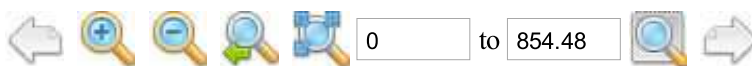

Label all possible matches  Label matches used for scoring

**Monoisotopic mass of neutral peptide Mr(calc):** 953.4760

**Fixed modifications:** Carbamidomethyl (C) (apply to specified residues or termini only)

**Ions Score:** 26 **Expect:** 83

**Matches :** 10/81 fragment ions using 14 most intense peaks ([help](#))

| # | Immon.   | a        | a*       | b        | b*       | d        | Seq. | v        | w        | y        | y*       | # |
|---|----------|----------|----------|----------|----------|----------|------|----------|----------|----------|----------|---|
| 1 | 120.0808 | 120.0808 |          | 148.0757 |          | 44.0495  | F    |          |          |          |          | 8 |
| 2 | 120.0808 | 267.1492 |          | 295.1441 |          |          | F    | 715.3522 |          | 807.4148 | 790.3883 | 7 |
| 3 | 72.0808  | 366.2176 |          | 394.2125 |          | 352.2020 | V    | 616.2838 | 629.3042 | 660.3464 | 643.3198 | 6 |
| 4 | 30.0338  | 423.2391 |          | 451.2340 |          |          | G    |          |          | 561.2780 | 544.2514 | 5 |
| 5 | 30.0338  | 480.2605 |          | 508.2554 |          |          | G    |          |          | 504.2565 | 487.2300 | 4 |
| 6 | 87.0553  | 594.3035 | 577.2769 | 622.2984 | 605.2718 | 551.2976 | N    | 388.1979 | 387.2027 | 447.2350 | 430.2085 | 3 |
| 7 | 159.0917 | 780.3828 | 763.3562 | 808.3777 | 791.3511 |          | W    | 202.1186 |          | 333.1921 | 316.1656 | 2 |
| 8 | 101.1073 |          |          |          |          |          | K    | 74.0237  | 73.0284  | 147.1128 | 130.0863 | 1 |

| Seq          | ya              | yb       | Seq           | ya       | yb       | Seq          | ya              | yb       |
|--------------|-----------------|----------|---------------|----------|----------|--------------|-----------------|----------|
| <b>FV</b>    | 219.1492        | 247.1441 | <b>FVG</b>    | 276.1707 | 304.1656 | <b>FVGG</b>  | <b>333.1921</b> | 361.1870 |
| <b>FVGGN</b> | <b>447.2350</b> | 475.2300 | <b>FVGGNW</b> | 633.3144 | 661.3093 | <b>VG</b>    | 129.1022        | 157.0972 |
| <b>VGG</b>   | 186.1237        | 214.1186 | <b>VGGN</b>   | 300.1666 | 328.1615 | <b>VGGNW</b> | 486.2459        | 514.2409 |
| <b>GG</b>    | 87.0553         | 115.0502 | <b>GGN</b>    | 201.0982 | 229.0931 | <b>GGNW</b>  | 387.1775        | 415.1724 |
| <b>GN</b>    | 144.0768        | 172.0717 | <b>GNW</b>    | 330.1561 | 358.1510 | <b>NW</b>    | 273.1346        | 301.1295 |

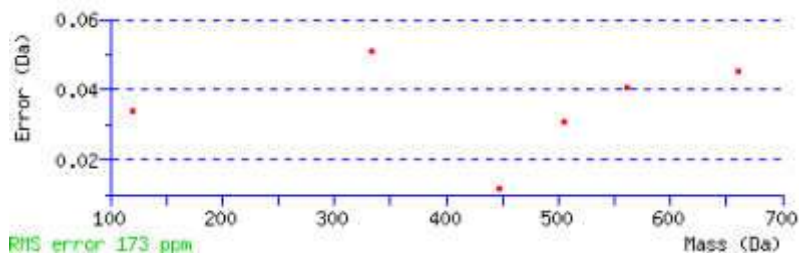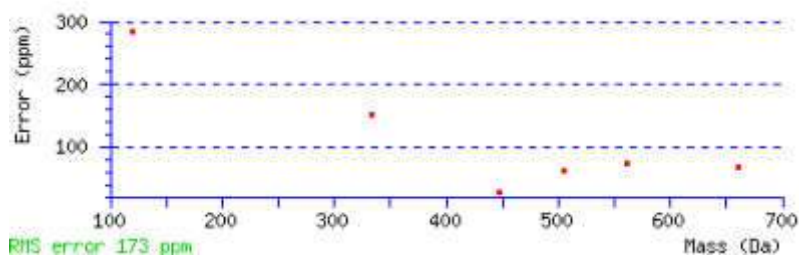

NCBI **BLAST** search of [FFVGGNWK](#)

(Parameters: blastp, nr protein database, expect=20000, no filter, PAM30)

Other BLAST [web gateways](#)

#### All matches to this query

| Score | Mr(calc) | Delta   | Sequence                 |
|-------|----------|---------|--------------------------|
| 28.8  | 953.4832 | 0.0118  | <a href="#">FFRGQGR</a>  |
| 28.8  | 953.4832 | 0.0118  | <a href="#">FFRQSGR</a>  |
| 27.8  | 953.5083 | -0.0133 | <a href="#">FFVNGSKR</a> |
| 27.8  | 953.4389 | 0.0561  | <a href="#">MFVNSANR</a> |
| 27.7  | 953.4641 | 0.0309  | <a href="#">MFVEIGSR</a> |
| 26.9  | 953.4641 | 0.0309  | <a href="#">MFVNKDGK</a> |
| 26.5  | 953.4059 | 0.0891  | <a href="#">MDMNKSGR</a> |
| 26.5  | 953.4059 | 0.0891  | <a href="#">MDMNKSGR</a> |
| 25.6  | 953.4760 | 0.0190  | <a href="#">FFVGGNWK</a> |
| 25.6  | 953.4760 | 0.0190  | <a href="#">FFVGGNWK</a> |

Mascot: <http://www.matrixscience.com/>

**MATRIX SCIENCE Mascot Search Results**

**Peptide View Spot no 28**

**MS/MS Fragmentation of VIACVGETLEQR**

Found in **gi553107** in **NCBItr**, triosephosphate isomerase, partial [Oryza sativa Japonica Group]

Match to Query 55: 1373.738124 from(1374.745400,1+) intensity(0.0000) index(14)

Title: Label: J9, Spot\_Id: 219811, Peak\_List\_Id: 226893, MSMS Job\_Run\_Id: 21859, Comment:

Data file C:\Documents and Settings\Administrator\Desktop\Farah-Garima 11May 2013\ppw\_J9\_136859946600.txt

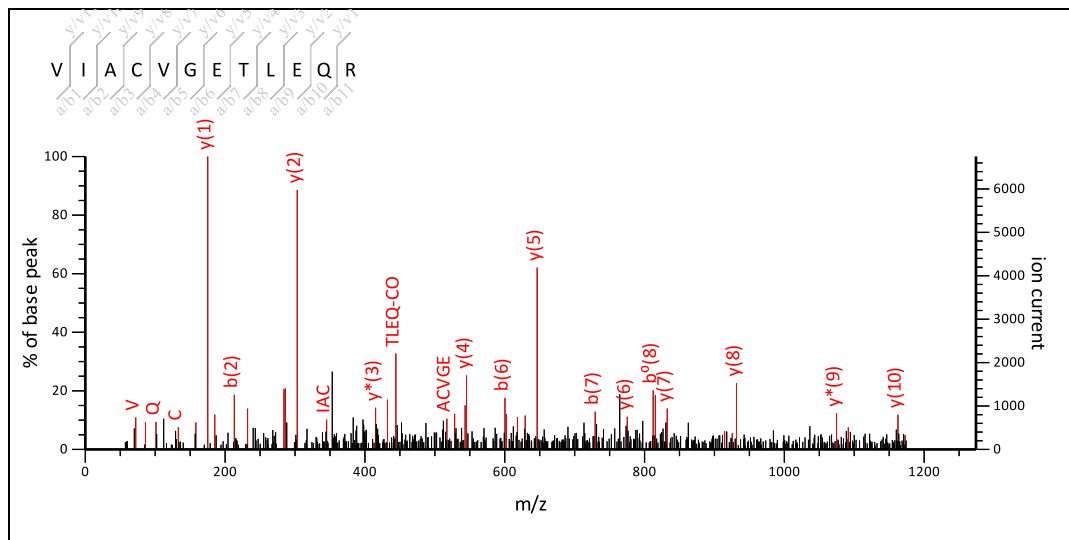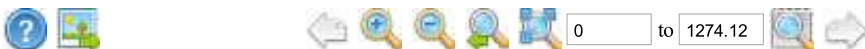

Label all possible matches  Label matches used for scoring

Monoisotopic mass of neutral peptide Mr(calc): 1373.6973

Fixed modifications: Carbamidomethyl (C) (apply to specified residues or termini only)

Ions Score: 68 Expect: 0.0055

Matches : 48/179 fragment ions using 60 most intense peaks [\(help\)](#)

| #  | Immon.   | a         | a*        | a <sup>0</sup> | b         | b*        | b <sup>0</sup> | d         | d'       | Seq. | v         | w         | w'        | y         | y*        |
|----|----------|-----------|-----------|----------------|-----------|-----------|----------------|-----------|----------|------|-----------|-----------|-----------|-----------|-----------|
| 1  | 72.0808  | 72.0808   |           |                | 100.0757  |           |                | 44.0495   |          | V    |           |           |           |           |           |
| 2  | 86.0964  | 185.1648  |           |                | 213.1598  |           |                | 157.1335  | 171.1492 | I    | 1217.5579 | 1230.5783 | 1244.5940 | 1275.6362 | 1258.6096 |
| 3  | 44.0495  | 256.2020  |           |                | 284.1969  |           |                |           |          | A    | 1146.5208 |           |           | 1162.5521 | 1145.5256 |
| 4  | 133.0430 | 416.2326  |           |                | 444.2275  |           |                | 327.2391  |          | C    | 986.4902  | 985.4949  |           | 1091.5150 | 1074.4884 |
| 5  | 72.0808  | 515.3010  |           |                | 543.2959  |           |                | 501.2854  |          | V    | 887.4217  | 900.4421  |           | 931.4843  | 914.4578  |
| 6  | 30.0338  | 572.3225  |           |                | 600.3174  |           |                |           |          | G    |           |           |           | 832.4159  | 815.3894  |
| 7  | 102.0550 | 701.3651  |           | 683.3545       | 729.3600  |           | 711.3494       | 643.3596  |          | E    | 701.3577  | 700.3624  |           | 775.3945  | 758.3679  |
| 8  | 74.0600  | 802.4128  |           | 784.4022       | 830.4077  |           | 812.3971       | 786.4178  | 788.3971 | T    | 600.3100  | 613.3304  | 615.3097  | 646.3519  | 629.3253  |
| 9  | 86.0964  | 915.4968  |           | 897.4863       | 943.4917  |           | 925.4812       | 873.4499  |          | L    | 487.2259  | 486.2307  |           | 545.3042  | 528.2776  |
| 10 | 102.0550 | 1044.5394 |           | 1026.5288      | 1072.5343 |           | 1054.5238      | 986.5339  |          | E    | 358.1833  | 357.1881  |           | 432.2201  | 415.1936  |
| 11 | 101.0709 | 1172.5980 | 1155.5714 | 1154.5874      | 1200.5929 | 1183.5664 | 1182.5823      | 1115.5765 |          | Q    | 230.1248  | 229.1295  |           | 303.1775  | 286.1510  |
| 12 | 129.1135 |           |           |                |           |           |                |           |          | R    | 74.0237   | 73.0284   |           | 175.1190  | 158.0924  |

| Seq    | ya       | yb       | Seq    | ya       | yb       | Seq    | ya       | yb       |
|--------|----------|----------|--------|----------|----------|--------|----------|----------|
| IA     | 157.1335 | 185.1285 | IAC    | 317.1642 | 345.1591 | IACV   | 416.2326 | 444.2275 |
| IACVG  | 473.2541 | 501.2490 | IACVGE | 602.2967 | 630.2916 | AC     | 204.0801 | 232.0750 |
| ACV    | 303.1485 | 331.1435 | ACVG   | 360.1700 | 388.1649 | ACVGE  | 489.2126 | 517.2075 |
| ACVGET | 590.2603 | 618.2552 | CV     | 232.1114 | 260.1063 | CVG    | 289.1329 | 317.1278 |
| CVGE   | 418.1755 | 446.1704 | CVGET  | 519.2232 | 547.2181 | CVGETL | 632.3072 | 660.3021 |
| VG     | 129.1022 | 157.0972 | VGE    | 258.1448 | 286.1397 | VGET   | 359.1925 | 387.1874 |
| VGETL  | 472.2766 | 500.2715 | VGETLE | 601.3192 | 629.3141 | GE     | 159.0764 | 187.0713 |
| GET    | 260.1241 | 288.1190 | GETL   | 373.2082 | 401.2031 | GETLE  | 502.2508 | 530.2457 |
| GETLEQ | 630.3093 | 658.3042 | ET     | 203.1026 | 231.0975 | ETL    | 316.1867 | 344.1816 |



|                      |          |          |                       |                 |          |                    |          |          |
|----------------------|----------|----------|-----------------------|-----------------|----------|--------------------|----------|----------|
| <a href="#">ETLE</a> | 445.2293 | 473.2242 | <a href="#">ETLEQ</a> | 573.2879        | 601.2828 | <a href="#">TL</a> | 187.1441 | 215.1390 |
| <a href="#">TLE</a>  | 316.1867 | 344.1816 | <a href="#">TLEQ</a>  | <b>444.2453</b> | 472.2402 | <a href="#">LE</a> | 215.1390 | 243.1339 |
| <a href="#">LEQ</a>  | 343.1976 | 371.1925 | <a href="#">EQ</a>    | 230.1135        | 258.1084 |                    |          |          |

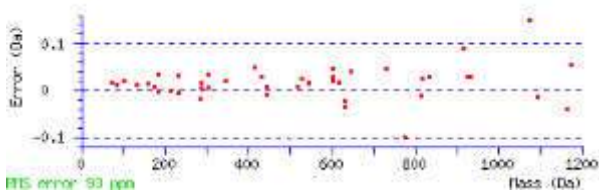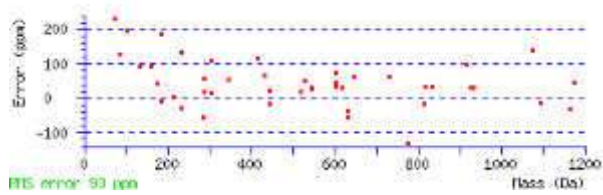

NCBI **BLAST** search of [VIACVGETLEQR](#)

(Parameters: blastp, nr protein database, expect=20000, no filter, PAM30)

Other BLAST [web gateways](#)

#### All matches to this query

| Score | Mr(calc)  | Delta   | Sequence                      |
|-------|-----------|---------|-------------------------------|
| 68.0  | 1373.6973 | 0.0408  | <a href="#">VIACVGETLEQR</a>  |
| 58.0  | 1373.6973 | 0.0408  | <a href="#">VIACVGETLQER</a>  |
| 39.6  | 1373.6972 | 0.0409  | <a href="#">QMLAADEAIEKR</a>  |
| 37.0  | 1373.6575 | 0.0806  | <a href="#">NWDIAETELQR</a>   |
| 37.0  | 1373.7701 | -0.0319 | <a href="#">LVCSGLVTELKR</a>  |
| 36.4  | 1373.7337 | 0.0044  | <a href="#">IVSCADITVLAGR</a> |
| 36.1  | 1373.6609 | 0.0772  | <a href="#">CVALEGEPGVSTR</a> |
| 35.3  | 1373.7150 | 0.0231  | <a href="#">AITEOTLSDALGR</a> |
| 33.8  | 1373.7263 | 0.0119  | <a href="#">ATGITRETLEGAR</a> |
| 33.8  | 1373.7336 | 0.0045  | <a href="#">DSQIAMIAELKR</a>  |

Mascot: <http://www.matrixscience.com/>



**MATRIX SCIENCE Mascot Search Results**

**Peptide View Spot no 28**

MS/MS Fragmentation of **WLAANVSAEVAESTR**

Found in **gi553107** in **NCBItr**, triosephosphate isomerase, partial [Oryza sativa Japonica Group]

Match to Query 71: 1602.848324 from(1603.855600,1+) intensity(0.0000) index(20)

Title: Label: J9, Spot\_Id: 219811, Peak\_List\_Id: 226889, MSMS Job\_Run\_Id: 21859, Comment:

Data file C:\Documents and Settings\Administrator\Desktop\Farah-Garima 11May 2013\ppw\_J9\_136859946600.txt

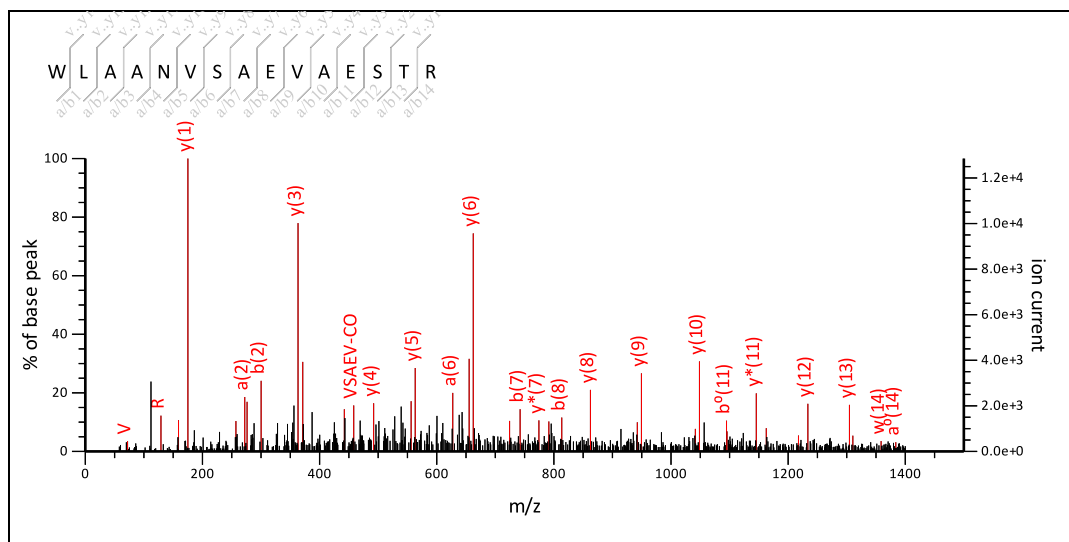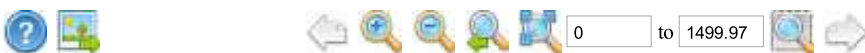

Label all possible matches  Label matches used for scoring

Monoisotopic mass of neutral peptide Mr(calc): 1602.8002

Fixed modifications: Carbamidomethyl (C) (apply to specified residues or termini only)

Ions Score: 137 Expect: 6e-10

Matches : 53/270 fragment ions using 42 most intense peaks (help)

| #  | Immon.   | a         | a*        | a <sup>0</sup> | b         | b*        | b <sup>0</sup> | d         | d'        | Seq. | v         | w         | w'       | y         | y*        |
|----|----------|-----------|-----------|----------------|-----------|-----------|----------------|-----------|-----------|------|-----------|-----------|----------|-----------|-----------|
| 1  | 159.0917 | 159.0917  |           |                | 187.0866  |           |                | 44.0495   |           | W    |           |           |          |           |           |
| 2  | 86.0964  | 272.1757  |           |                | 300.1707  |           |                | 230.1288  |           | L    | 1359.6499 | 1358.6546 |          | 1417.7281 | 1400.7016 |
| 3  | 44.0495  | 343.2129  |           |                | 371.2078  |           |                |           |           | A    | 1288.6128 |           |          | 1304.6441 | 1287.6175 |
| 4  | 44.0495  | 414.2500  |           |                | 442.2449  |           |                |           |           | A    | 1217.5757 |           |          | 1233.6070 | 1216.5804 |
| 5  | 87.0553  | 528.2929  | 511.2663  |                | 556.2878  | 539.2613  |                | 485.2871  |           | N    | 1103.5327 | 1102.5375 |          | 1162.5699 | 1145.5433 |
| 6  | 72.0808  | 627.3613  | 610.3348  |                | 655.3562  | 638.3297  |                | 613.3457  |           | V    | 1004.4643 | 1017.4847 |          | 1048.5269 | 1031.5004 |
| 7  | 60.0444  | 714.3933  | 697.3668  | 696.3828       | 742.3882  | 725.3617  | 724.3777       | 698.3984  |           | S    | 917.4323  | 916.4371  |          | 949.4585  | 932.4320  |
| 8  | 44.0495  | 785.4304  | 768.4039  | 767.4199       | 813.4254  | 796.3988  | 795.4148       |           |           | A    | 846.3952  |           |          | 862.4265  | 845.3999  |
| 9  | 102.0550 | 914.4730  | 897.4465  | 896.4625       | 942.4680  | 925.4414  | 924.4574       | 856.4676  |           | E    | 717.3526  | 716.3573  |          | 791.3894  | 774.3628  |
| 10 | 72.0808  | 1013.5415 | 996.5149  | 995.5309       | 1041.5364 | 1024.5098 | 1023.5258      | 999.5258  |           | V    | 618.2842  | 631.3046  |          | 662.3468  | 645.3202  |
| 11 | 44.0495  | 1084.5786 | 1067.5520 | 1066.5680      | 1112.5735 | 1095.5469 | 1094.5629      |           |           | A    | 547.2471  |           |          | 563.2784  | 546.2518  |
| 12 | 102.0550 | 1213.6212 | 1196.5946 | 1195.6106      | 1241.6161 | 1224.5895 | 1223.6055      | 1155.6157 |           | E    | 418.2045  | 417.2092  |          | 492.2413  | 475.2147  |
| 13 | 60.0444  | 1300.6532 | 1283.6266 | 1282.6426      | 1328.6481 | 1311.6216 | 1310.6375      | 1284.6583 |           | S    | 331.1724  | 330.1772  |          | 363.1987  | 346.1721  |
| 14 | 74.0600  | 1401.7009 | 1384.6743 | 1383.6903      | 1429.6958 | 1412.6692 | 1411.6852      | 1385.7060 | 1387.6852 | T    | 230.1248  | 243.1452  | 245.1244 | 276.1666  | 259.1401  |
| 15 | 129.1135 |           |           |                |           |           |                |           |           | R    | 74.0237   | 73.0284   |          | 175.1190  | 158.0924  |

| Seq   | ya       | yb       | Seq    | ya       | yb       | Seq     | ya       | yb       |
|-------|----------|----------|--------|----------|----------|---------|----------|----------|
| LA    | 157.1335 | 185.1285 | LAA    | 228.1707 | 256.1656 | LAAN    | 342.2136 | 370.2085 |
| LAANV | 441.2820 | 469.2769 | LAANVS | 528.3140 | 556.3089 | LAANVSA | 599.3511 | 627.3461 |
| AA    | 115.0866 | 143.0815 | AAN    | 229.1295 | 257.1244 | AANV    | 328.1979 | 356.1928 |
| AANVS | 415.2300 | 443.2249 | AANVSA | 486.2671 | 514.2620 | AANVSAE | 615.3097 | 643.3046 |
| AN    | 158.0924 | 186.0873 | ANV    | 257.1608 | 285.1557 | ANVS    | 344.1928 | 372.1878 |
| ANVSA | 415.2300 | 443.2249 | ANVSAE | 544.2726 | 572.2675 | ANVSAEV | 643.3410 | 671.3359 |

|       |          |          |        |          |          |         |          |          |
|-------|----------|----------|--------|----------|----------|---------|----------|----------|
| NV    | 186.1237 | 214.1186 | NVS    | 273.1557 | 301.1506 | NVSA    | 344.1928 | 372.1878 |
| NVSAE | 473.2354 | 501.2304 | NVSAEV | 572.3039 | 600.2988 | NVSAEVA | 643.3410 | 671.3359 |
| VS    | 159.1128 | 187.1077 | VSA    | 230.1499 | 258.1448 | VSAE    | 359.1925 | 387.1874 |
| VSAEV | 458.2609 | 486.2558 | VSAEVA | 529.2980 | 557.2930 | VSAEVAE | 658.3406 | 686.3355 |
| SA    | 131.0815 | 159.0764 | SAE    | 260.1241 | 288.1190 | SAEV    | 359.1925 | 387.1874 |
| SAEVA | 430.2296 | 458.2245 | SAEVAE | 559.2722 | 587.2671 | SAEVAES | 646.3042 | 674.2992 |
| AE    | 173.0921 | 201.0870 | AEV    | 272.1605 | 300.1554 | AEVA    | 343.1976 | 371.1925 |
| AEVAE | 472.2402 | 500.2351 | AEVAES | 559.2722 | 587.2671 | AEVAEST | 660.3199 | 688.3148 |
| EV    | 201.1234 | 229.1183 | EVA    | 272.1605 | 300.1554 | EVAE    | 401.2031 | 429.1980 |
| EVAES | 488.2351 | 516.2300 | EVAEST | 589.2828 | 617.2777 | VA      | 143.1179 | 171.1128 |
| VAE   | 272.1605 | 300.1554 | VAES   | 359.1925 | 387.1874 | VAEST   | 460.2402 | 488.2351 |
| AE    | 173.0921 | 201.0870 | AES    | 260.1241 | 288.1190 | AEST    | 361.1718 | 389.1667 |
| ES    | 189.0870 | 217.0819 | EST    | 290.1347 | 318.1296 | ST      | 161.0921 | 189.0870 |

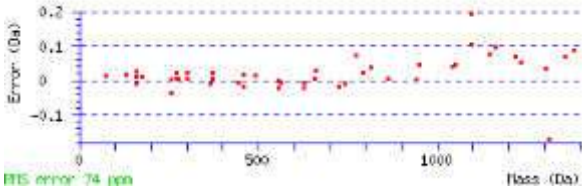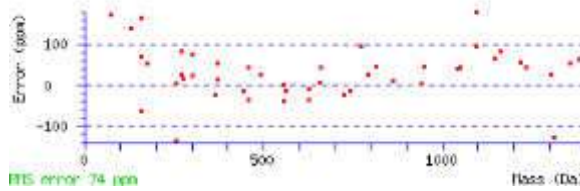

NCBI BLAST search of [WLAANVSAEVAESTR](#)  
 (Parameters: blastp, nr protein database, expect=20000, no filter, PAM30)  
 Other BLAST [web gateways](#)

All matches to this query

| Score | Mr(calc)  | Delta  | Sequence                          |
|-------|-----------|--------|-----------------------------------|
| 137.3 | 1602.8002 | 0.0482 | <a href="#">WLAANVSAEVAESTR</a>   |
| 34.3  | 1602.7896 | 0.0587 | <a href="#">GTLDAQGVANRMOAR</a>   |
| 34.3  | 1602.7494 | 0.0989 | <a href="#">MOSEADIAMVHLAR</a>    |
| 33.3  | 1602.8148 | 0.0336 | <a href="#">SVDLAAGRATVEAGMR</a>  |
| 33.0  | 1602.7784 | 0.0700 | <a href="#">TRSPNDAAEMAALTR</a>   |
| 33.0  | 1602.7889 | 0.0594 | <a href="#">DYYVNSSLVLSTR</a>     |
| 32.8  | 1602.7121 | 0.1362 | <a href="#">LDAAAAADAAEEDSOR</a>  |
| 32.7  | 1602.7889 | 0.0594 | <a href="#">DKPSQVSWLAESEK</a>    |
| 30.4  | 1602.8399 | 0.0084 | <a href="#">KSNILVSAEDMQLR</a>    |
| 29.4  | 1602.7671 | 0.0812 | <a href="#">IAGASEGPSAEVASAMR</a> |

Mascot: <http://www.matrixscience.com/>

**MATRIX SCIENCE Mascot Search Results**

**Peptide View Spot no 28**

**MS/MS Fragmentation of VATPDQAQEVHDGLR**

Found in **gi553107** in **NCBI nr**, triosephosphate isomerase, partial [Oryza sativa Japonica Group]

Match to Query 76: 1634.847224 from(1635.854500,1+) intensity(0.0000) index(21)

Title: Label: J9, Spot\_Id: 219811, Peak\_List\_Id: 226913, MSMS Job\_Run\_Id: 21859, Comment:

Data file C:\Documents and Settings\Administrator\Desktop\Farah-Garima 11May 2013\ppw\_J9\_136859946600.txt

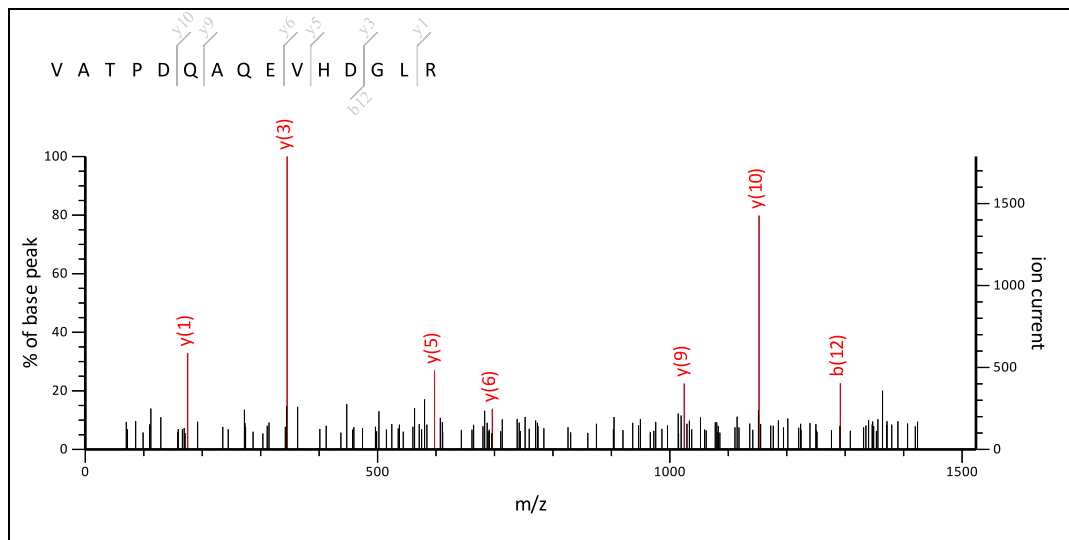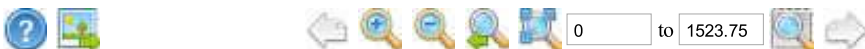

Label all possible matches  Label matches used for scoring

Monoisotopic mass of neutral peptide Mr(calc): 1634.8013

Fixed modifications: Carbamidomethyl (C) (apply to specified residues or termini only)

Ions Score: 31 Expect: 27

Matches : 7/260 fragment ions using 14 most intense peaks ([help](#))

| #  | Immon.   | a         | a*        | a <sup>0</sup> | b         | b*        | b <sup>0</sup> | d         | d'       | Seq. | v         | w         | w'        | y         | y*        |
|----|----------|-----------|-----------|----------------|-----------|-----------|----------------|-----------|----------|------|-----------|-----------|-----------|-----------|-----------|
| 1  | 72.0808  | 72.0808   |           |                | 100.0757  |           |                | 44.0495   |          | V    |           |           |           |           |           |
| 2  | 44.0495  | 143.1179  |           |                | 171.1128  |           |                |           |          | A    | 1520.7088 |           |           | 1536.7401 | 1519.7136 |
| 3  | 74.0600  | 244.1656  |           | 226.1550       | 272.1605  |           | 254.1499       | 228.1707  | 230.1499 | T    | 1419.6611 | 1432.6815 | 1434.6608 | 1465.7030 | 1448.6764 |
| 4  | 70.0651  | 341.2183  |           | 323.2078       | 369.2132  |           | 351.2027       | 315.2027  |          | P    | 1322.6084 | 1321.6131 |           | 1364.6553 | 1347.6288 |
| 5  | 88.0393  | 456.2453  |           | 438.2347       | 484.2402  |           | 466.2296       | 412.2554  |          | D    | 1207.5814 | 1206.5862 |           | 1267.6026 | 1250.5760 |
| 6  | 101.0709 | 584.3039  | 567.2773  | 566.2933       | 612.2988  | 595.2722  | 594.2882       | 527.2824  |          | Q    | 1079.5228 | 1078.5276 |           | 1152.5756 | 1135.5491 |
| 7  | 44.0495  | 655.3410  | 638.3144  | 637.3304       | 683.3359  | 666.3093  | 665.3253       |           |          | A    | 1008.4857 |           |           | 1024.5170 | 1007.4905 |
| 8  | 101.0709 | 783.3995  | 766.3730  | 765.3890       | 811.3945  | 794.3679  | 793.3839       | 726.3781  |          | Q    | 880.4272  | 879.4319  |           | 953.4799  | 936.4534  |
| 9  | 102.0550 | 912.4421  | 895.4156  | 894.4316       | 940.4371  | 923.4105  | 922.4265       | 854.4367  |          | E    | 751.3846  | 750.3893  |           | 825.4213  | 808.3948  |
| 10 | 72.0808  | 1011.5106 | 994.4840  | 993.5000       | 1039.5055 | 1022.4789 | 1021.4949      | 997.4949  |          | V    | 652.3161  | 665.3365  |           | 696.3787  | 679.3522  |
| 11 | 110.0713 | 1148.5695 | 1131.5429 | 1130.5589      | 1176.5644 | 1159.5378 | 1158.5538      |           |          | H    | 515.2572  |           |           | 597.3103  | 580.2838  |
| 12 | 88.0393  | 1263.5964 | 1246.5699 | 1245.5858      | 1291.5913 | 1274.5648 | 1273.5808      | 1219.6066 |          | D    | 400.2303  | 399.2350  |           | 460.2514  | 443.2249  |
| 13 | 30.0338  | 1320.6179 | 1303.5913 | 1302.6073      | 1348.6128 | 1331.5862 | 1330.6022      |           |          | G    |           |           |           | 345.2245  | 328.1979  |
| 14 | 86.0964  | 1433.7019 | 1416.6754 | 1415.6914      | 1461.6969 | 1444.6703 | 1443.6863      | 1391.6550 |          | L    | 230.1248  | 229.1295  |           | 288.2030  | 271.1765  |
| 15 | 129.1135 |           |           |                |           |           |                |           |          | R    | 74.0237   | 73.0284   |           | 175.1190  | 158.0924  |

| Seq    | ya       | yb       | Seq    | ya       | yb       | Seq     | ya       | yb       |
|--------|----------|----------|--------|----------|----------|---------|----------|----------|
| AT     | 145.0972 | 173.0921 | ATP    | 242.1499 | 270.1448 | ATPD    | 357.1769 | 385.1718 |
| ATPDQ  | 485.2354 | 513.2304 | ATPDQA | 556.2726 | 584.2675 | ATPDQAQ | 684.3311 | 712.3260 |
| TP     | 171.1128 | 199.1077 | TPD    | 286.1397 | 314.1347 | TPDQ    | 414.1983 | 442.1932 |
| TPDQA  | 485.2354 | 513.2304 | TPDQAQ | 613.2940 | 641.2889 | PD      | 185.0921 | 213.0870 |
| PDQ    | 313.1506 | 341.1456 | PDQA   | 384.1878 | 412.1827 | PDQAQ   | 512.2463 | 540.2413 |
| PDQAQE | 641.2889 | 669.2838 | DQ     | 216.0979 | 244.0928 | DQA     | 287.1350 | 315.1299 |

|                        |          |          |                        |          |          |                        |          |          |
|------------------------|----------|----------|------------------------|----------|----------|------------------------|----------|----------|
| <a href="#">DQAQ</a>   | 415.1936 | 443.1885 | <a href="#">DQAQE</a>  | 544.2362 | 572.2311 | <a href="#">DQAQEV</a> | 643.3046 | 671.2995 |
| <a href="#">QA</a>     | 172.1081 | 200.1030 | <a href="#">QAQ</a>    | 300.1666 | 328.1615 | <a href="#">QAQE</a>   | 429.2092 | 457.2041 |
| <a href="#">QAQEV</a>  | 528.2776 | 556.2726 | <a href="#">QAQEVH</a> | 665.3366 | 693.3315 | <a href="#">AQ</a>     | 172.1081 | 200.1030 |
| <a href="#">AQE</a>    | 301.1506 | 329.1456 | <a href="#">AQEV</a>   | 400.2191 | 428.2140 | <a href="#">AQEVH</a>  | 537.2780 | 565.2729 |
| <a href="#">AQEVHD</a> | 652.3049 | 680.2998 | <a href="#">QE</a>     | 230.1135 | 258.1084 | <a href="#">QEV</a>    | 329.1819 | 357.1769 |
| <a href="#">QEVH</a>   | 466.2409 | 494.2358 | <a href="#">QEVHD</a>  | 581.2678 | 609.2627 | <a href="#">QEVHDG</a> | 638.2893 | 666.2842 |
| <a href="#">EV</a>     | 201.1234 | 229.1183 | <a href="#">EVH</a>    | 338.1823 | 366.1772 | <a href="#">EVHD</a>   | 453.2092 | 481.2041 |
| <a href="#">EVHDG</a>  | 510.2307 | 538.2256 | <a href="#">EVHDGL</a> | 623.3148 | 651.3097 | <a href="#">VH</a>     | 209.1397 | 237.1346 |
| <a href="#">VHD</a>    | 324.1666 | 352.1615 | <a href="#">VHDG</a>   | 381.1881 | 409.1830 | <a href="#">VHDGL</a>  | 494.2722 | 522.2671 |
| <a href="#">HD</a>     | 225.0982 | 253.0931 | <a href="#">HDG</a>    | 282.1197 | 310.1146 | <a href="#">HDGL</a>   | 395.2037 | 423.1987 |
| <a href="#">DG</a>     | 145.0608 | 173.0557 | <a href="#">DGL</a>    | 258.1448 | 286.1397 | <a href="#">GL</a>     | 143.1179 | 171.1128 |

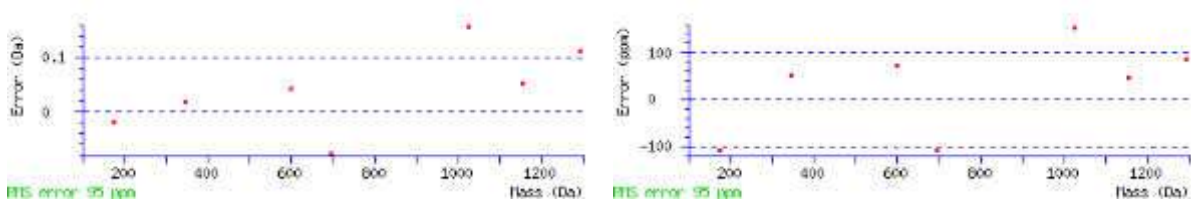

NCBI **BLAST** search of [VATPDQAQEVHDGLR](#)

(Parameters: blastp, nr protein database, expect=20000, no filter, PAM30)

Other BLAST [web gateways](#)

#### All matches to this query

| Score | Mr(calc)  | Delta   | Sequence                          |
|-------|-----------|---------|-----------------------------------|
| 30.6  | 1634.8013 | 0.0460  | <a href="#">VATPDQAQEVHDGLR</a>   |
| 22.2  | 1634.8601 | -0.0129 | <a href="#">QLNOOGLTRHDLGR</a>    |
| 14.4  | 1634.9355 | -0.0883 | <a href="#">KIQLEQLSVLPPDR</a>    |
| 13.9  | 1634.9104 | -0.0632 | <a href="#">IDVRPAVDTLPGGIGR</a>  |
| 13.7  | 1635.0083 | -0.1611 | <a href="#">SLLVAGATALAAPLVLR</a> |
| 13.2  | 1634.8628 | -0.0155 | <a href="#">KESOGALILVDGYSR</a>   |
| 12.9  | 1634.8297 | 0.0175  | <a href="#">AALDLMTSLQEKSGR</a>   |
| 12.9  | 1634.9290 | -0.0818 | <a href="#">KGINAILGPCIGPLGR</a>  |
| 12.4  | 1634.8239 | 0.0233  | <a href="#">LLEOGAVCFSWLGR</a>    |
| 12.4  | 1634.8273 | 0.0200  | <a href="#">ALLWGGATLGVGMAMR</a>  |

Mascot: <http://www.matrixscience.com/>

**MATRIX SCIENCE Mascot Search Results**

**Peptide View Spot no 28**

MS/MS Fragmentation of **SQLRPEIQVAAQNCWVK**

Found in **gi553107** in **NCBItr**, triosephosphate isomerase, partial [Oryza sativa Japonica Group]

Match to Query 105: 2026.095624 from(2027.102900,1+) intensity(0.0000) index(30)

Title: Label: J9, Spot\_Id: 219811, Peak\_List\_Id: 226888, MSMS Job\_Run\_Id: 21859, Comment:

Data file C:\Documents and Settings\Administrator\Desktop\Farah-Garima 11May 2013\ppw\_J9\_136859946600.txt

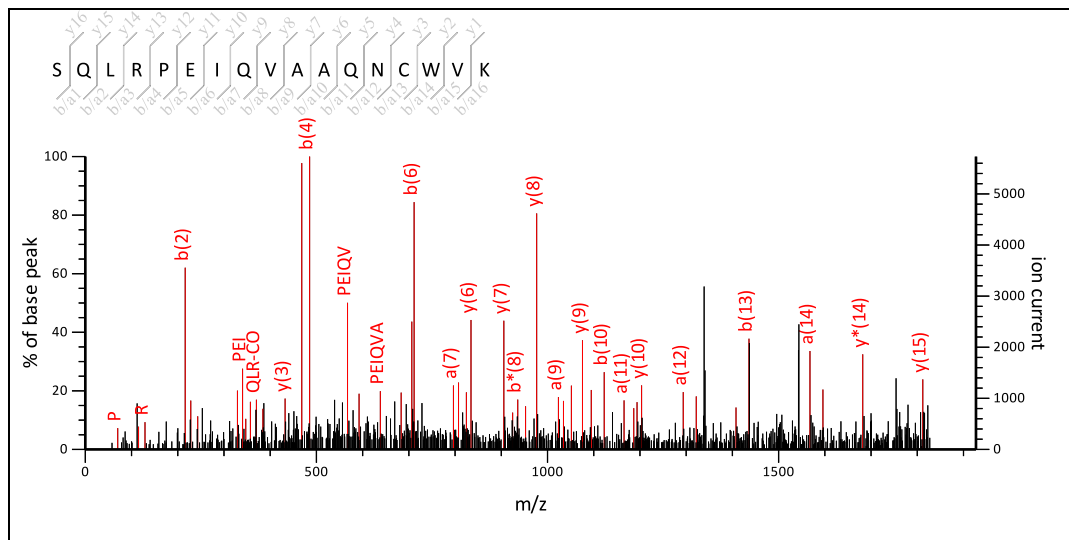

Navigation icons: Home, Back, Forward, Search, Print, etc. Range: 0 to 1927.01

Label all possible matches  Label matches used for scoring

Monoisotopic mass of neutral peptide Mr(calc): 2026.0418

Fixed modifications: Carbamidomethyl (C) (apply to specified residues or termini only)

Ions Score: 79 Expect: 0.00034

Matches : 57/305 fragment ions using 72 most intense peaks (help)

| #  | Immon.   | a         | a*        | a <sup>0</sup> | b         | b*        | b <sup>0</sup> | d         | d'       | Seq. | v         | w         | w'        | y         | y*        |
|----|----------|-----------|-----------|----------------|-----------|-----------|----------------|-----------|----------|------|-----------|-----------|-----------|-----------|-----------|
| 1  | 60.0444  | 60.0444   |           | 42.0338        | 88.0393   |           | 70.0287        | 44.0495   |          | S    |           |           |           |           |           |
| 2  | 101.0709 | 188.1030  | 171.0764  | 170.0924       | 216.0979  | 199.0713  | 198.0873       | 131.0815  |          | Q    | 1866.9643 | 1865.9691 |           | 1940.0171 | 1922.9905 |
| 3  | 86.0964  | 301.1870  | 284.1605  | 283.1765       | 329.1819  | 312.1554  | 311.1714       | 259.1401  |          | L    | 1753.8803 | 1752.8850 |           | 1811.9585 | 1794.9320 |
| 4  | 129.1135 | 457.2881  | 440.2616  | 439.2776       | 485.2831  | 468.2565  | 467.2725       | 372.2241  |          | R    | 1597.7791 | 1596.7839 |           | 1698.8744 | 1681.8479 |
| 5  | 70.0651  | 554.3409  | 537.3144  | 536.3303       | 582.3358  | 565.3093  | 564.3253       | 528.3253  |          | P    | 1500.7264 | 1499.7311 |           | 1542.7733 | 1525.7468 |
| 6  | 102.0550 | 683.3835  | 666.3569  | 665.3729       | 711.3784  | 694.3519  | 693.3678       | 625.3780  |          | E    | 1371.6838 | 1370.6885 |           | 1445.7206 | 1428.6940 |
| 7  | 86.0964  | 796.4676  | 779.4410  | 778.4570       | 824.4625  | 807.4359  | 806.4519       | 768.4363  | 782.4519 | I    | 1258.5997 | 1271.6201 | 1285.6358 | 1316.6780 | 1299.6514 |
| 8  | 101.0709 | 924.5261  | 907.4996  | 906.5156       | 952.5211  | 935.4945  | 934.5105       | 867.5047  |          | Q    | 1130.5411 | 1129.5459 |           | 1203.5939 | 1186.5674 |
| 9  | 72.0808  | 1023.5946 | 1006.5680 | 1005.5840      | 1051.5895 | 1034.5629 | 1033.5789      | 1009.5789 |          | V    | 1031.4727 | 1044.4931 |           | 1075.5353 | 1058.5088 |
| 10 | 44.0495  | 1094.6317 | 1077.6051 | 1076.6211      | 1122.6266 | 1105.6000 | 1104.6160      |           |          | A    | 960.4356  |           |           | 976.4669  | 959.4404  |
| 11 | 44.0495  | 1165.6688 | 1148.6422 | 1147.6582      | 1193.6637 | 1176.6371 | 1175.6531      |           |          | A    | 889.3985  |           |           | 905.4298  | 888.4033  |
| 12 | 101.0709 | 1293.7274 | 1276.7008 | 1275.7168      | 1321.7223 | 1304.6957 | 1303.7117      | 1236.7059 |          | Q    | 761.3399  | 760.3447  |           | 834.3927  | 817.3661  |
| 13 | 87.0553  | 1407.7703 | 1390.7437 | 1389.7597      | 1435.7652 | 1418.7387 | 1417.7546      | 1364.7645 |          | N    | 647.2970  | 646.3017  |           | 706.3341  | 689.3076  |
| 14 | 133.0430 | 1567.8009 | 1550.7744 | 1549.7904      | 1595.7959 | 1578.7693 | 1577.7853      | 1478.8074 |          | C    | 487.2663  | 486.2711  |           | 592.2912  | 575.2646  |
| 15 | 159.0917 | 1753.8803 | 1736.8537 | 1735.8697      | 1781.8752 | 1764.8486 | 1763.8646      |           |          | W    | 301.1870  |           |           | 432.2605  | 415.2340  |
| 16 | 72.0808  | 1852.9487 | 1835.9221 | 1834.9381      | 1880.9436 | 1863.9170 | 1862.9330      | 1838.9330 |          | V    | 202.1186  | 215.1390  |           | 246.1812  | 229.1547  |
| 17 | 101.1073 |           |           |                |           |           |                |           |          | K    | 74.0237   | 73.0284   |           | 147.1128  | 130.0863  |

| Seq   | ya       | yb       | Seq   | ya       | yb       | Seq   | ya       | yb       |
|-------|----------|----------|-------|----------|----------|-------|----------|----------|
| QL    | 214.1550 | 242.1499 | QLR   | 370.2561 | 398.2510 | QLRP  | 467.3089 | 495.3038 |
| QLRPE | 596.3515 | 624.3464 | LR    | 242.1975 | 270.1925 | LRP   | 339.2503 | 367.2452 |
| LRPE  | 468.2929 | 496.2878 | LRPEI | 581.3770 | 609.3719 | RP    | 226.1662 | 254.1612 |
| RPE   | 355.2088 | 383.2037 | RPEI  | 468.2929 | 496.2878 | RPEIQ | 596.3515 | 624.3464 |

|         |          |          |        |          |          |         |          |          |
|---------|----------|----------|--------|----------|----------|---------|----------|----------|
| RPEIQV  | 695.4199 | 723.4148 | PE     | 199.1077 | 227.1026 | PEI     | 312.1918 | 340.1867 |
| PEIQ    | 440.2504 | 468.2453 | PEIQV  | 539.3188 | 567.3137 | PEIQVA  | 610.3559 | 638.3508 |
| PEIQVAA | 681.3930 | 709.3879 | EI     | 215.1390 | 243.1339 | EIQ     | 343.1976 | 371.1925 |
| EIQV    | 442.2660 | 470.2609 | EIQVA  | 513.3031 | 541.2980 | EIQVAA  | 584.3402 | 612.3352 |
| IQ      | 214.1550 | 242.1499 | IQV    | 313.2234 | 341.2183 | IQVA    | 384.2605 | 412.2554 |
| IQVAA   | 455.2976 | 483.2926 | IQVAAQ | 583.3562 | 611.3511 | IQVAAQN | 697.3992 | 725.3941 |
| QV      | 200.1394 | 228.1343 | QVA    | 271.1765 | 299.1714 | QVAA    | 342.2136 | 370.2085 |
| QVAAQ   | 470.2722 | 498.2671 | QVAAQN | 584.3151 | 612.3100 | VA      | 143.1179 | 171.1128 |
| VAA     | 214.1550 | 242.1499 | VAAQ   | 342.2136 | 370.2085 | VAAQN   | 456.2565 | 484.2514 |
| VAAQNC  | 616.2872 | 644.2821 | AA     | 115.0866 | 143.0815 | AAQ     | 243.1452 | 271.1401 |
| AAQN    | 357.1881 | 385.1830 | AAQNC  | 517.2187 | 545.2137 | AQ      | 172.1081 | 200.1030 |
| AQN     | 286.1510 | 314.1459 | AQNC   | 446.1816 | 474.1765 | AQNCW   | 632.2609 | 660.2559 |
| QN      | 215.1139 | 243.1088 | QNC    | 375.1445 | 403.1394 | QNCW    | 561.2238 | 589.2187 |
| QNCWV   | 660.2922 | 688.2872 | NC     | 247.0859 | 275.0809 | NCW     | 433.1652 | 461.1602 |
| NCWV    | 532.2337 | 560.2286 | CW     | 319.1223 | 347.1172 | CWV     | 418.1907 | 446.1857 |
| WV      | 258.1601 | 286.1550 |        |          |          |         |          |          |

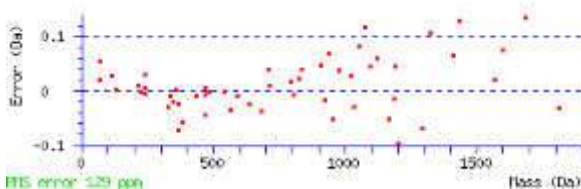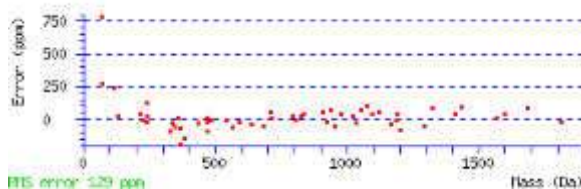

NCBI BLAST search of [SOLRPEIQVAAONCWVK](#)

(Parameters: blastp, nr protein database, expect=20000, no filter, PAM30)

Other BLAST [web gateways](#)

#### All matches to this query

| Score | Mr(calc)  | Delta   | Sequence                               |
|-------|-----------|---------|----------------------------------------|
| 78.5  | 2026.0418 | 0.0538  | <a href="#">SOLRPEIQVAAONCWVK</a>      |
| 29.1  | 2026.1324 | -0.0368 | <a href="#">DVPAGAVTLAGVAHVPAIGGVR</a> |
| 24.0  | 2026.1211 | -0.0255 | <a href="#">VKEINIAPSVNLPPPDAPR</a>    |
| 22.3  | 2026.1146 | -0.0190 | <a href="#">VVRVLPGMQAAFVDIGQAR</a>    |
| 21.9  | 2026.1575 | -0.0619 | <a href="#">LIQVAVGSAASSGVFLAAPR</a>   |
| 21.4  | 2025.9136 | 0.1821  | <a href="#">CSPSYGGENVAAQLAEVMK</a>    |
| 19.4  | 2026.0378 | 0.0578  | <a href="#">QSLSLLAOVOAMAQSDRHR</a>    |
| 19.1  | 2026.0847 | 0.0109  | <a href="#">RLDPSIPSNAAVFELIER</a>     |
| 18.7  | 2026.1397 | -0.0441 | <a href="#">LLLRIPOAPAMAALFER</a>      |
| 18.2  | 2026.1609 | -0.0652 | <a href="#">LTGGGIALIVGAGMALSIGRL</a>  |

Mascot: <http://www.matrixscience.com/>





# Mascot Search Results

## Peptide View **Spot no 29**

MS/MS Fragmentation of **GVNPWIEVDGGVGP**K

Found in **gi|4105561** in **NCBI**nr, ribulose-5-phosphate-3-epimerase [Oryza sativa]

Match to Query 77: 1522.849324 from(1523.856600,1+) intensity(0.0000) index(21)

Title: Label: J20, Spot\_Id: 219987, Peak\_List\_Id: 229446, MSMS Job\_Run\_Id: 22021, Comment:

Data file C:\Documents and Settings\Administrator\Desktop\Farah-Garima 11May 2013\ppw\_J20\_136868359600.txt

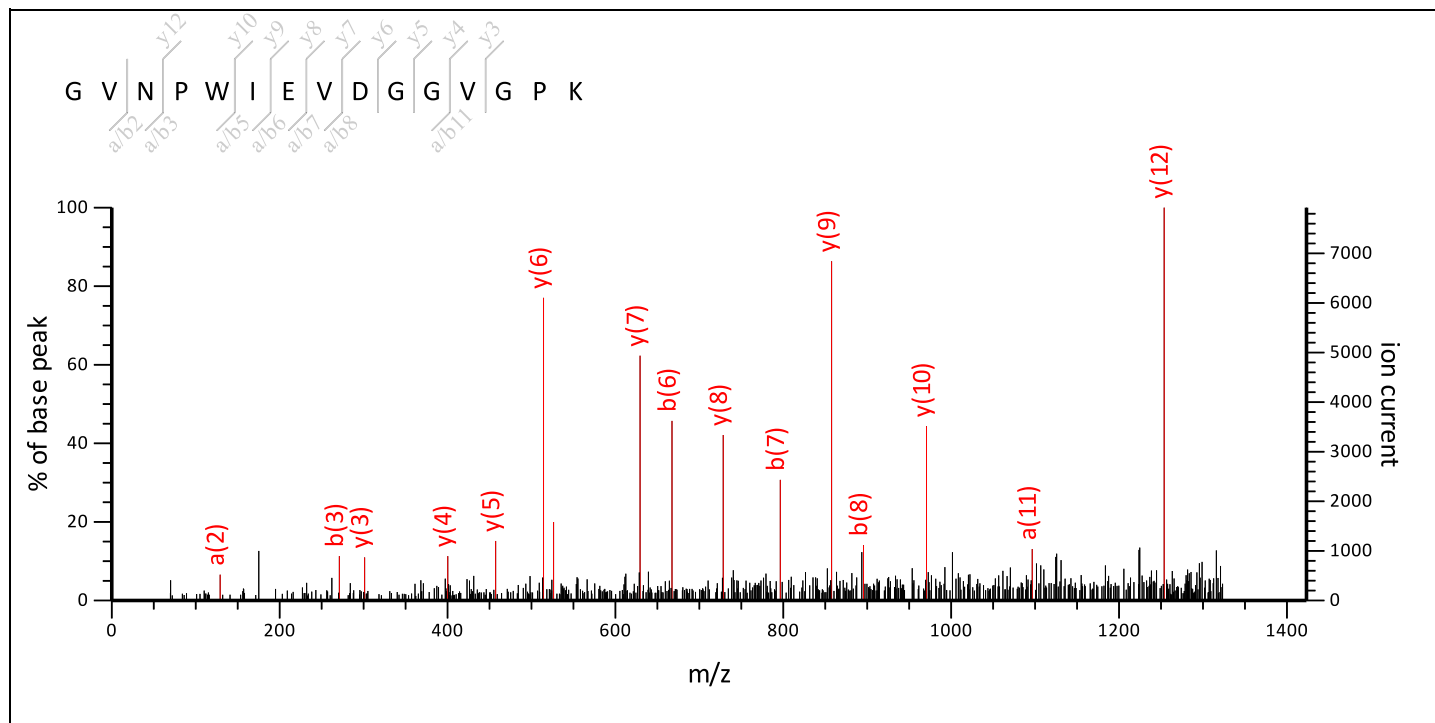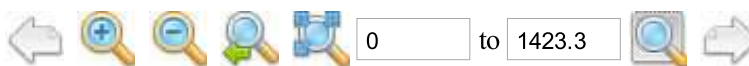

Label all possible matches  Label matches used for scoring

**Monoisotopic mass of neutral peptide Mr(calc):** 1522.7780

**Fixed modifications:** Carbamidomethyl (C) (apply to specified residues or termini only)

**Ions Score:** 63 **Expect:** 0.00085

**Matches :** 16/80 fragment ions using 26 most intense peaks ([help](#))

| # | a               | a*       | b               | b*       | Seq.     | y                | y*        | #         |
|---|-----------------|----------|-----------------|----------|----------|------------------|-----------|-----------|
| 1 | 30.0338         |          | 58.0287         |          | <b>G</b> |                  |           | <b>15</b> |
| 2 | <b>129.1022</b> |          | 157.0972        |          | <b>V</b> | 1466.7638        | 1449.7373 | <b>14</b> |
| 3 | 243.1452        | 226.1186 | <b>271.1401</b> | 254.1135 | <b>N</b> | 1367.6954        | 1350.6688 | <b>13</b> |
| 4 | 340.1979        | 323.1714 | 368.1928        | 351.1663 | <b>P</b> | <b>1253.6525</b> | 1236.6259 | <b>12</b> |
| 5 | <b>526.2772</b> | 509.2507 | 554.2722        | 537.2456 | <b>W</b> | 1156.5997        | 1139.5732 | <b>11</b> |
| 6 | 639.3613        | 622.3348 | <b>667.3562</b> | 650.3297 | <b>I</b> | <b>970.5204</b>  | 953.4938  | <b>10</b> |
| 7 | 768.4039        | 751.3774 | <b>796.3988</b> | 779.3723 | <b>E</b> | <b>857.4363</b>  | 840.4098  | <b>9</b>  |
| 8 | 867.4723        | 850.4458 | <b>895.4672</b> | 878.4407 | <b>V</b> | <b>728.3937</b>  | 711.3672  | <b>8</b>  |



|    |           |           |           |           |   |          |          |   |
|----|-----------|-----------|-----------|-----------|---|----------|----------|---|
| 9  | 982.4993  | 965.4727  | 1010.4942 | 993.4676  | D | 629.3253 | 612.2988 | 7 |
| 10 | 1039.5207 | 1022.4942 | 1067.5156 | 1050.4891 | G | 514.2984 | 497.2718 | 6 |
| 11 | 1096.5422 | 1079.5156 | 1124.5371 | 1107.5106 | G | 457.2769 | 440.2504 | 5 |
| 12 | 1195.6106 | 1178.5840 | 1223.6055 | 1206.5790 | V | 400.2554 | 383.2289 | 4 |
| 13 | 1252.6321 | 1235.6055 | 1280.6270 | 1263.6004 | G | 301.1870 | 284.1605 | 3 |
| 14 | 1349.6848 | 1332.6583 | 1377.6797 | 1360.6532 | P | 244.1656 | 227.1390 | 2 |
| 15 |           |           |           |           | K | 147.1128 | 130.0863 | 1 |

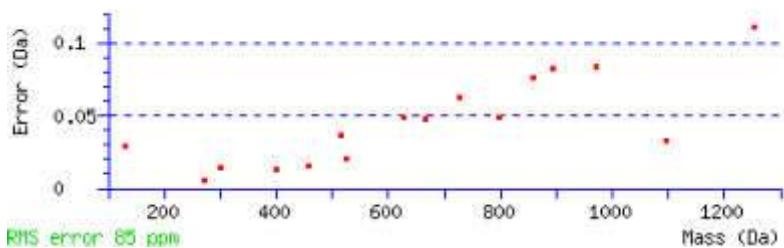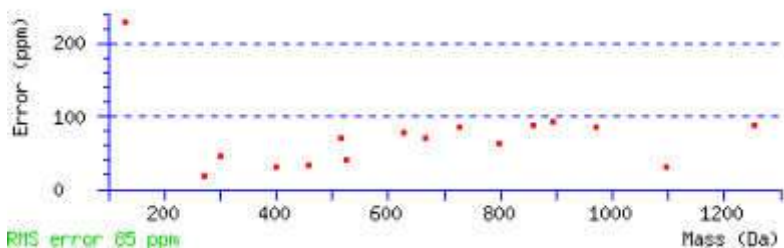

NCBI BLAST search of [GVNPWIEVDGGVGPK](#)

(Parameters: blastp, nr protein database, expect=20000, no filter, PAM30)

Other BLAST [web gateways](#)

#### All matches to this query

| Score | Mr(calc)  | Delta   | Sequence                         |
|-------|-----------|---------|----------------------------------|
| 63.0  | 1522.7780 | 0.0713  | <a href="#">GVNPWIEVDGGVGPK</a>  |
| 22.3  | 1522.8943 | -0.0450 | <a href="#">NRGLLLEQQIALR</a>    |
| 13.6  | 1522.9096 | -0.0603 | <a href="#">RGGILGLLLAGWAAR</a>  |
| 11.8  | 1522.7739 | 0.0754  | <a href="#">NTQIGKSQLEYSR</a>    |
| 11.7  | 1522.8944 | -0.0450 | <a href="#">RIGVGAAGGGVLVLER</a> |
| 9.2   | 1522.8103 | 0.0390  | <a href="#">QAQLDSITIPQGR</a>    |
| 8.9   | 1522.7164 | 0.1329  | <a href="#">NLAENSATFGGTWR</a>   |
| 8.8   | 1522.8580 | -0.0086 | <a href="#">LNILVNNAGTGK PGR</a> |
| 8.5   | 1522.7052 | 0.1441  | <a href="#">AKVWGDNQEDAYK</a>    |
| 7.9   | 1522.8216 | 0.0277  | <a href="#">RGQDPIVNVIEQR</a>    |

Mascot: <http://www.matrixscience.com/>

# MATRIX SCIENCE Mascot Search Results

## Peptide View **Spot no 29**

MS/MS Fragmentation of **NDIIVSPISILSANFSK**

Found in **gi|4105561** in **NCBI**nr, ribulose-5-phosphate-3-epimerase [*Oryza sativa*]

Match to Query 89: 1703.984524 from(1704.991800,1+) intensity(0.0000) index(25)

Title: Label: J20, Spot\_Id: 219987, Peak\_List\_Id: 229444, MSMS Job\_Run\_Id: 22021, Comment:

Data file C:\Documents and Settings\Administrator\Desktop\Farah-Garima 11May 2013\ppw\_J20\_136868359600.txt

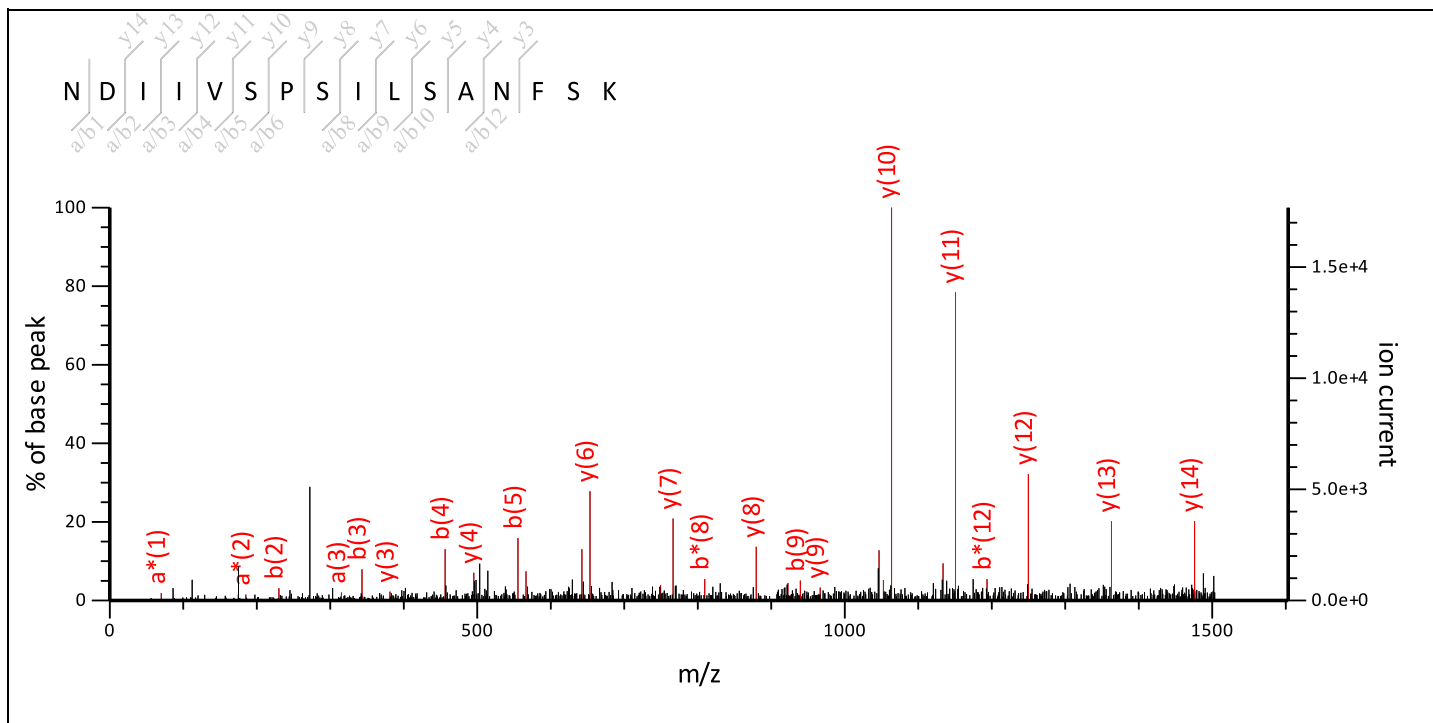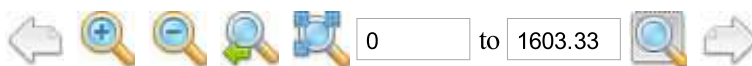

Label all possible matches  Label matches used for scoring

**Monoisotopic mass of neutral peptide Mr(calc):** 1703.9094

**Fixed modifications:** Carbamidomethyl (C) (apply to specified residues or termini only)

**Ions Score:** 53 **Expect:** 0.006

**Matches :** 28/90 fragment ions using 75 most intense peaks ([help](#))

| # | a        | a*       | b        | b*       | Seq. | y         | y*        | #  |
|---|----------|----------|----------|----------|------|-----------|-----------|----|
| 1 | 87.0553  | 70.0287  | 115.0502 | 98.0237  | N    |           |           | 16 |
| 2 | 202.0822 | 185.0557 | 230.0771 | 213.0506 | D    | 1590.8737 | 1573.8472 | 15 |
| 3 | 315.1663 | 298.1397 | 343.1612 | 326.1347 | I    | 1475.8468 | 1458.8203 | 14 |
| 4 | 428.2504 | 411.2238 | 456.2453 | 439.2187 | I    | 1362.7627 | 1345.7362 | 13 |
| 5 | 527.3188 | 510.2922 | 555.3137 | 538.2871 | V    | 1249.6787 | 1232.6521 | 12 |
| 6 | 614.3508 | 597.3243 | 642.3457 | 625.3192 | S    | 1150.6103 | 1133.5837 | 11 |
| 7 | 711.4036 | 694.3770 | 739.3985 | 722.3719 | P    | 1063.5782 | 1046.5517 | 10 |
| 8 | 798.4356 | 781.4090 | 826.4305 | 809.4040 | S    | 966.5255  | 949.4989  | 9  |

|    |           |           |                  |                  |   |                 |                 |   |
|----|-----------|-----------|------------------|------------------|---|-----------------|-----------------|---|
| 9  | 911.5197  | 894.4931  | <b>939.5146</b>  | <b>922.4880</b>  | I | <b>879.4934</b> | 862.4669        | 8 |
| 10 | 1024.6037 | 1007.5772 | <b>1052.5986</b> | 1035.5721        | L | <b>766.4094</b> | <b>749.3828</b> | 7 |
| 11 | 1111.6357 | 1094.6092 | 1139.6307        | 1122.6041        | S | <b>653.3253</b> | 636.2988        | 6 |
| 12 | 1182.6729 | 1165.6463 | 1210.6678        | <b>1193.6412</b> | A | <b>566.2933</b> | 549.2667        | 5 |
| 13 | 1296.7158 | 1279.6892 | 1324.7107        | 1307.6842        | N | <b>495.2562</b> | 478.2296        | 4 |
| 14 | 1443.7842 | 1426.7577 | 1471.7791        | 1454.7526        | F | <b>381.2132</b> | 364.1867        | 3 |
| 15 | 1530.8162 | 1513.7897 | 1558.8111        | 1541.7846        | S | 234.1448        | 217.1183        | 2 |
| 16 |           |           |                  |                  | K | 147.1128        | 130.0863        | 1 |

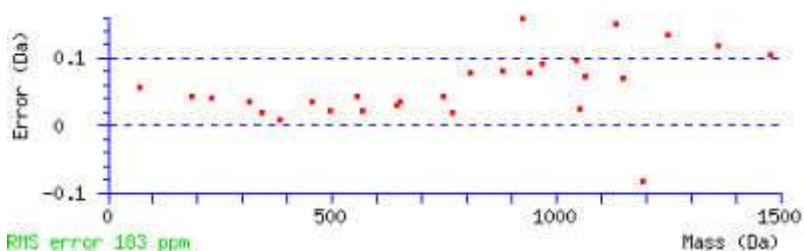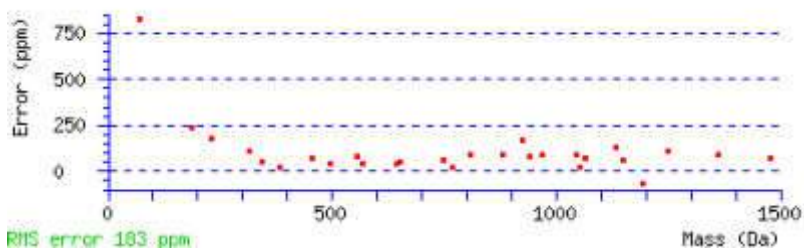

NCBI **BLAST** search of [NDIIVSPSILSANFSK](#)

(Parameters: blastp, nr protein database, expect=20000, no filter, PAM30)

Other BLAST [web gateways](#)

#### All matches to this query

| Score | Mr(calc)  | Delta  | Sequence                           |
|-------|-----------|--------|------------------------------------|
| 53.5  | 1703.9094 | 0.0751 | <a href="#">NDIIVSPSILSANFSK</a>   |
| 45.9  | 1703.9458 | 0.0388 | <a href="#">KDVIVSPSILSANFSK</a>   |
| 17.5  | 1703.9682 | 0.0163 | <a href="#">SAALADLPIRPSGAPR</a>   |
| 13.1  | 1703.9028 | 0.0817 | <a href="#">EEVFRTLAMNLR</a>       |
| 12.1  | 1703.9359 | 0.0486 | <a href="#">HLTTSLLSPLSPPWR</a>    |
| 11.7  | 1703.8665 | 0.1180 | <a href="#">GDGGGMYLSAIQAVLPR</a>  |
| 11.1  | 1703.8955 | 0.0890 | <a href="#">GEGGGNAVTVPLGLPPNR</a> |
| 9.1   | 1703.8168 | 0.1677 | <a href="#">LWVWGQNQGSNYPR</a>     |
| 8.6   | 1703.9795 | 0.0051 | <a href="#">LVQGAPISASQPRPKR</a>   |
| 8.6   | 1703.8512 | 0.1333 | <a href="#">ERLQDALESIVEMR</a>     |

Mascot: <http://www.matrixscience.com/>



# Mascot Search Results

## Peptide View **Spot no 29**

MS/MS Fragmentation of **AVEVAGCDWIHVDVMDGR**

Found in **gi|4105561** in **NCBI nr**, ribulose-5-phosphate-3-epimerase [*Oryza sativa*]

Match to Query 95: 2028.020924 from(2029.028200,1+) intensity(0.0000) index(27)

Title: Label: J20, Spot\_Id: 219987, Peak\_List\_Id: 229448, MSMS Job\_Run\_Id: 22021, Comment:

Data file C:\Documents and Settings\Administrator\Desktop\Farah-Garima 11May 2013\ppw\_J20\_136868359600.txt

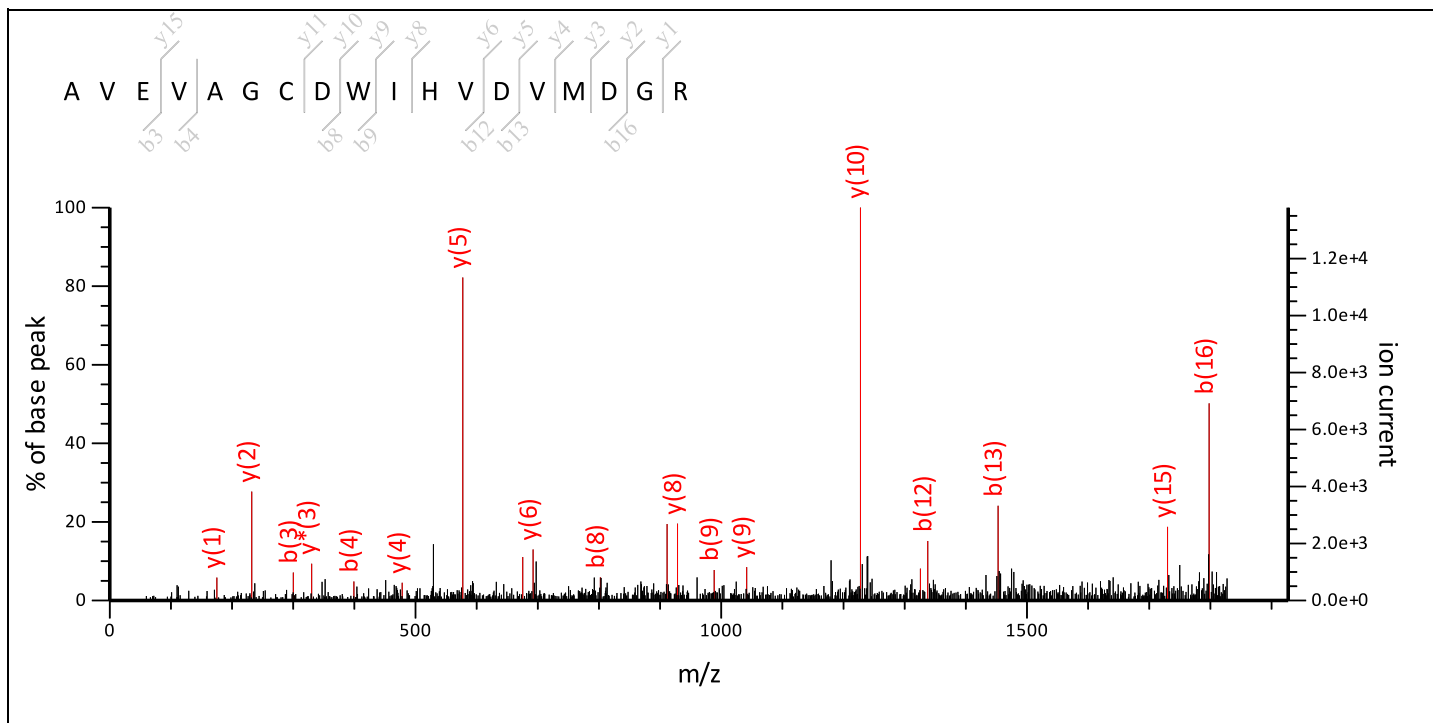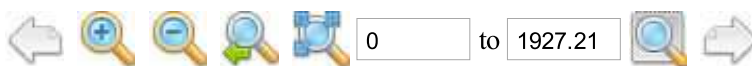

Label all possible matches  Label matches used for scoring

**Monoisotopic mass of neutral peptide Mr(calc):** 2027.9194

**Fixed modifications:** Carbamidomethyl (C) (apply to specified residues or termini only)

**Ions Score:** 49 **Expect:** 0.018

**Matches:** 20/68 fragment ions using 36 most intense peaks ([help](#))

| # | a        | b               | Seq. | y                | y*               | #  |
|---|----------|-----------------|------|------------------|------------------|----|
| 1 | 44.0495  | 72.0444         | A    |                  |                  | 18 |
| 2 | 143.1179 | 171.1128        | V    | 1957.8895        | 1940.8629        | 17 |
| 3 | 272.1605 | <b>300.1554</b> | E    | 1858.8211        | 1841.7945        | 16 |
| 4 | 371.2289 | <b>399.2238</b> | V    | <b>1729.7785</b> | 1712.7519        | 15 |
| 5 | 442.2660 | 470.2609        | A    | 1630.7101        | 1613.6835        | 14 |
| 6 | 499.2875 | 527.2824        | G    | 1559.6730        | 1542.6464        | 13 |
| 7 | 659.3181 | 687.3130        | C    | 1502.6515        | 1485.6249        | 12 |
| 8 | 774.3451 | <b>802.3400</b> | D    | 1342.6208        | <b>1325.5943</b> | 11 |

|    |           |           |   |           |           |    |
|----|-----------|-----------|---|-----------|-----------|----|
| 9  | 960.4244  | 988.4193  | W | 1227.5939 | 1210.5674 | 10 |
| 10 | 1073.5084 | 1101.5034 | I | 1041.5146 | 1024.4880 | 9  |
| 11 | 1210.5674 | 1238.5623 | H | 928.4305  | 911.4040  | 8  |
| 12 | 1309.6358 | 1337.6307 | V | 791.3716  | 774.3451  | 7  |
| 13 | 1424.6627 | 1452.6576 | D | 692.3032  | 675.2767  | 6  |
| 14 | 1523.7311 | 1551.7260 | V | 577.2763  | 560.2497  | 5  |
| 15 | 1654.7716 | 1682.7665 | M | 478.2078  | 461.1813  | 4  |
| 16 | 1769.7986 | 1797.7935 | D | 347.1674  | 330.1408  | 3  |
| 17 | 1826.8200 | 1854.8149 | G | 232.1404  | 215.1139  | 2  |
| 18 |           |           | R | 175.1190  | 158.0924  | 1  |

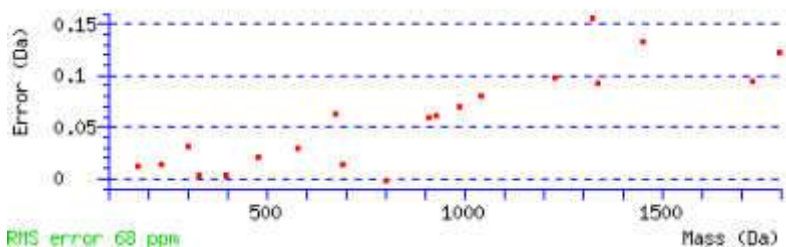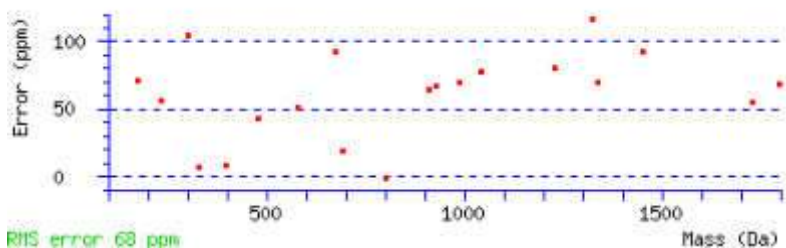

NCBI **BLAST** search of [AVEVAGCDWIHVDVMDGR](#)  
 (Parameters: blastp, nr protein database, expect=20000, no filter, PAM30)  
 Other BLAST [web gateways](#)

#### All matches to this query

| Score | Mr(calc)  | Delta   | Sequence                                |
|-------|-----------|---------|-----------------------------------------|
| 49.0  | 2027.9194 | 0.1016  | <a href="#">AVEVAGCDWIHVDVMDGR</a>      |
| 22.7  | 2027.9194 | 0.1016  | <a href="#">AVELAGCDWVHVDVMDGR</a>      |
| 7.3   | 2027.9701 | 0.0508  | <a href="#">KLYGDNGGGVNYVHSGYTK</a>     |
| 4.4   | 2027.9775 | 0.0434  | <a href="#">FVNLMEGHIWIDSEGPGK</a>      |
| 2.9   | 2027.8855 | 0.1355  | <a href="#">ADSFVGDMERGTLAEDSGR</a>     |
| 0.9   | 2027.9185 | 0.1025  | <a href="#">RLLLGDDGSGGGEYEDGR</a>      |
| 0.5   | 2028.1480 | -0.1271 | <a href="#">LGDHLRAGALPGVAGVPTSLK</a>   |
| 0.4   | 2027.9377 | 0.0832  | <a href="#">VKDYADVHWEYYQQ GK</a>       |
| 0.3   | 2028.0245 | -0.0036 | <a href="#">VSLCTQGDPQLRPTMGR</a>       |
| 0.1   | 2027.9872 | 0.0338  | <a href="#">LALAAAATETGADAAAAGENGGR</a> |

Mascot: <http://www.matrixscience.com/>

# MATRIX SCIENCE Mascot Search Results

## Peptide View **Spot no 29**

MS/MS Fragmentation of **AVEVAGCDWIHVDVMDGR**

Found in **gi|4105561** in **NCBI nr**, ribulose-5-phosphate-3-epimerase [*Oryza sativa*]

Match to Query 97: 2044.010324 from(2045.017600,1+) intensity(0.0000) index(28)

Title: Label: J20, Spot\_Id: 219987, Peak\_List\_Id: 229443, MSMS Job\_Run\_Id: 22021, Comment:

Data file C:\Documents and Settings\Administrator\Desktop\Farah-Garima 11May 2013\ppw\_J20\_136868359600.txt

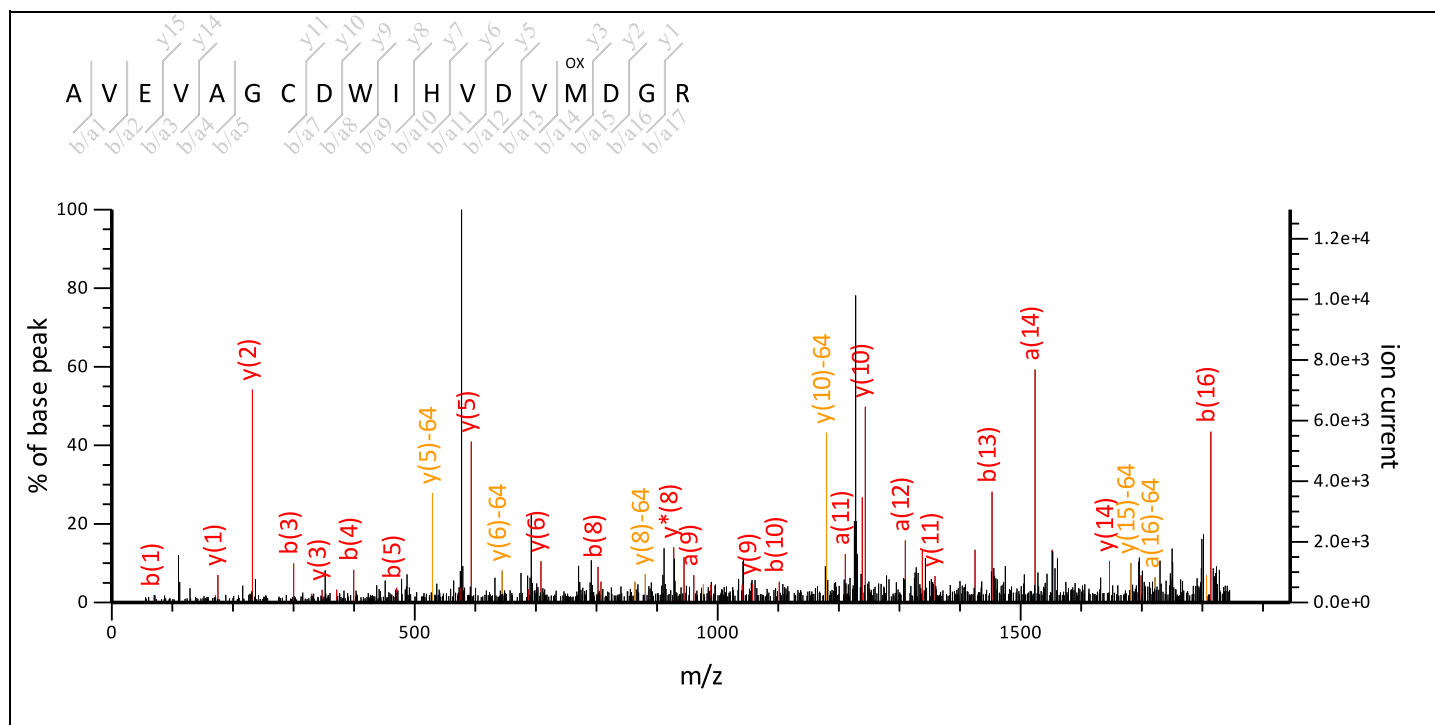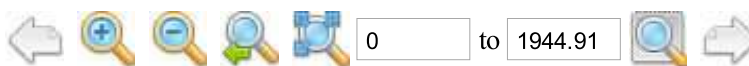

Label all possible matches  Label matches used for scoring

**Monoisotopic mass of neutral peptide Mr(calc):** 2043.9143

**Fixed modifications:** Carbamidomethyl (C) (apply to specified residues or termini only)

**Variable modifications:**

**M15** : Oxidation (M), with neutral losses 0.0000 (shown in table), 63.9983

**Ions Score:** 42 **Expect:** 0.088

**Matches** : 45/102 fragment ions using 180 most intense peaks ([help](#))

| # | a        | b        | Seq. | y         | y*        | #  |
|---|----------|----------|------|-----------|-----------|----|
| 1 | 44.0495  | 72.0444  | A    |           |           | 18 |
| 2 | 143.1179 | 171.1128 | V    | 1973.8844 | 1956.8579 | 17 |
| 3 | 272.1605 | 300.1554 | E    | 1874.8160 | 1857.7894 | 16 |
| 4 | 371.2289 | 399.2238 | V    | 1745.7734 | 1728.7469 | 15 |
| 5 | 442.2660 | 470.2609 | A    | 1646.7050 | 1629.6784 | 14 |
| 6 | 499.2875 | 527.2824 | G    | 1575.6679 | 1558.6413 | 13 |
| 7 | 659.3181 | 687.3130 | C    | 1518.6464 | 1501.6199 | 12 |

|    |           |           |   |           |           |    |
|----|-----------|-----------|---|-----------|-----------|----|
| 8  | 774.3451  | 802.3400  | D | 1358.6158 | 1341.5892 | 11 |
| 9  | 960.4244  | 988.4193  | W | 1243.5888 | 1226.5623 | 10 |
| 10 | 1073.5084 | 1101.5034 | I | 1057.5095 | 1040.4830 | 9  |
| 11 | 1210.5674 | 1238.5623 | H | 944.4254  | 927.3989  | 8  |
| 12 | 1309.6358 | 1337.6307 | V | 807.3665  | 790.3400  | 7  |
| 13 | 1424.6627 | 1452.6576 | D | 708.2981  | 691.2716  | 6  |
| 14 | 1523.7311 | 1551.7260 | V | 593.2712  | 576.2446  | 5  |
| 15 | 1670.7665 | 1698.7614 | M | 494.2028  | 477.1762  | 4  |
| 16 | 1785.7935 | 1813.7884 | D | 347.1674  | 330.1408  | 3  |
| 17 | 1842.8149 | 1870.8098 | G | 232.1404  | 215.1139  | 2  |
| 18 |           |           | R | 175.1190  | 158.0924  | 1  |

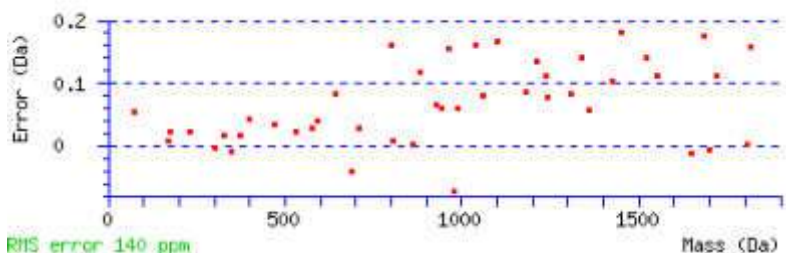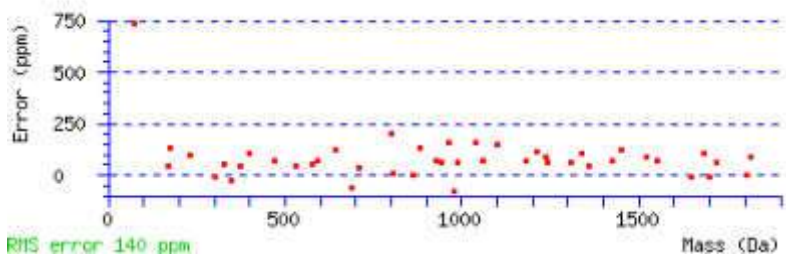

NCBI **BLAST** search of [AVEVAGCDWIHVDVMDGR](#)

(Parameters: blastp, nr protein database, expect=20000, no filter, PAM30)

Other BLAST [web gateways](#)

#### All matches to this query

| Score | Mr(calc)  | Delta   | Sequence                             |
|-------|-----------|---------|--------------------------------------|
| 42.0  | 2043.9143 | 0.0960  | <a href="#">AVEVAGCDWIHVDVMDGR</a>   |
| 16.5  | 2043.9143 | 0.0960  | <a href="#">AVELAGCDWVHVDVMDGR</a>   |
| 7.3   | 2043.9498 | 0.0606  | <a href="#">GATATSEATRDLYDDVFGR</a>  |
| 4.2   | 2043.9585 | 0.0518  | <a href="#">MYGAAYTGEGAAIVPSHHGR</a> |
| 3.5   | 2044.0517 | -0.0414 | <a href="#">HTPEQLELLLYDLFEGK</a>    |
| 3.2   | 2044.0953 | -0.0850 | <a href="#">DDKLVAGALNLIGGDTLFGR</a> |
| 1.6   | 2044.0751 | -0.0647 | <a href="#">HVGMAPFVMAALQVVFATR</a>  |

Mascot: <http://www.matrixscience.com/>





# Mascot Search Results

## Peptide View **Spot no 29**

MS/MS Fragmentation of **AGADIVSVHCEQSSTIHLHR**

Found in **gi|4105561** in **NCBI nr**, ribulose-5-phosphate-3-epimerase [*Oryza sativa*]

Match to Query 106: 2216.185824 from(2217.193100,1+) intensity(0.0000) index(31)

Title: Label: J20, Spot\_Id: 219987, Peak\_List\_Id: 229442, MSMS Job\_Run\_Id: 22021, Comment:

Data file C:\Documents and Settings\Administrator\Desktop\Farah-Garima 11May 2013\ppw\_J20\_136868359600.txt

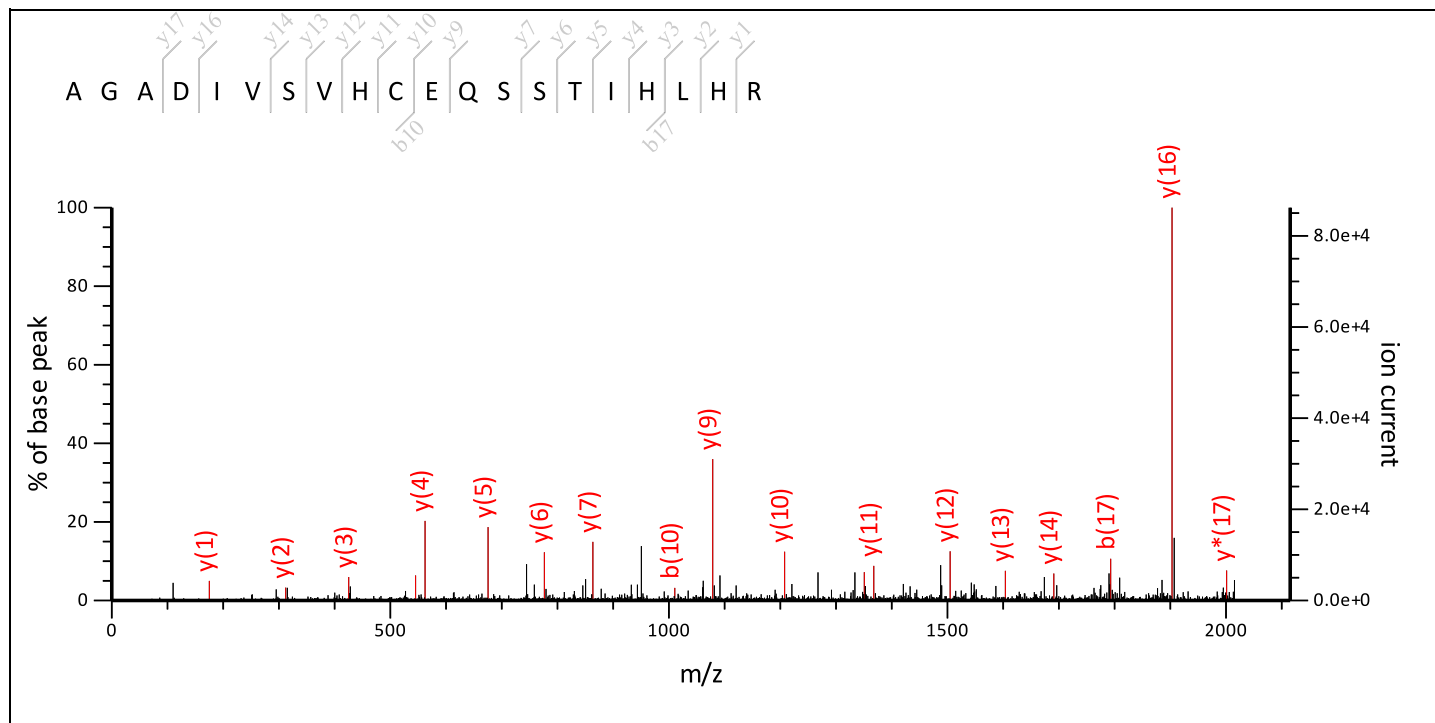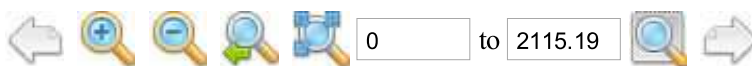

Label all possible matches  Label matches used for scoring

**Monoisotopic mass of neutral peptide Mr(calc):** 2216.0757

**Fixed modifications:** Carbamidomethyl (C) (apply to specified residues or termini only)

**Ions Score:** 149 **Expect:** 1.7e-12

**Matches :** 19/92 fragment ions using 20 most intense peaks ([help](#))

| # | a        | a* | b        | b* | Seq. | y         | y*        | #  |
|---|----------|----|----------|----|------|-----------|-----------|----|
| 1 | 44.0495  |    | 72.0444  |    | A    |           |           | 20 |
| 2 | 101.0709 |    | 129.0659 |    | G    | 2146.0458 | 2129.0193 | 19 |
| 3 | 172.1081 |    | 200.1030 |    | A    | 2089.0243 | 2071.9978 | 18 |
| 4 | 287.1350 |    | 315.1299 |    | D    | 2017.9872 | 2000.9607 | 17 |
| 5 | 400.2191 |    | 428.2140 |    | I    | 1902.9603 | 1885.9337 | 16 |
| 6 | 499.2875 |    | 527.2824 |    | V    | 1789.8762 | 1772.8497 | 15 |
| 7 | 586.3195 |    | 614.3144 |    | S    | 1690.8078 | 1673.7813 | 14 |
| 8 | 685.3879 |    | 713.3828 |    | V    | 1603.7758 | 1586.7492 | 13 |

|    |           |           |                  |           |   |                  |                  |    |
|----|-----------|-----------|------------------|-----------|---|------------------|------------------|----|
| 9  | 822.4468  |           | 850.4417         |           | H | <b>1504.7074</b> | 1487.6808        | 12 |
| 10 | 982.4775  |           | <b>1010.4724</b> |           | C | <b>1367.6485</b> | <b>1350.6219</b> | 11 |
| 11 | 1111.5201 |           | 1139.5150        |           | E | <b>1207.6178</b> | 1190.5913        | 10 |
| 12 | 1239.5786 | 1222.5521 | 1267.5736        | 1250.5470 | Q | <b>1078.5752</b> | 1061.5487        | 9  |
| 13 | 1326.6107 | 1309.5841 | 1354.6056        | 1337.5790 | S | 950.5166         | 933.4901         | 8  |
| 14 | 1413.6427 | 1396.6162 | 1441.6376        | 1424.6111 | S | <b>863.4846</b>  | 846.4581         | 7  |
| 15 | 1514.6904 | 1497.6638 | 1542.6853        | 1525.6587 | T | <b>776.4526</b>  | 759.4260         | 6  |
| 16 | 1627.7744 | 1610.7479 | 1655.7694        | 1638.7428 | I | <b>675.4049</b>  | 658.3784         | 5  |
| 17 | 1764.8334 | 1747.8068 | <b>1792.8283</b> | 1775.8017 | H | <b>562.3208</b>  | <b>545.2943</b>  | 4  |
| 18 | 1877.9174 | 1860.8909 | 1905.9123        | 1888.8858 | L | <b>425.2619</b>  | 408.2354         | 3  |
| 19 | 2014.9763 | 1997.9498 | 2042.9713        | 2025.9447 | H | <b>312.1779</b>  | 295.1513         | 2  |
| 20 |           |           |                  |           | R | <b>175.1190</b>  | 158.0924         | 1  |

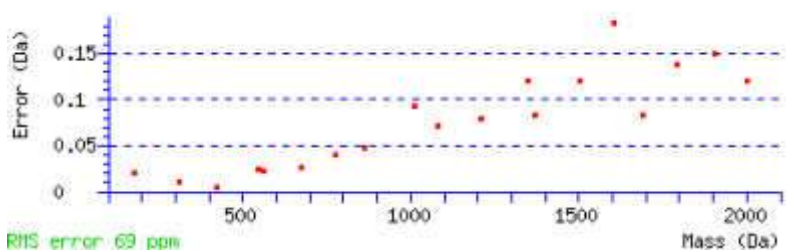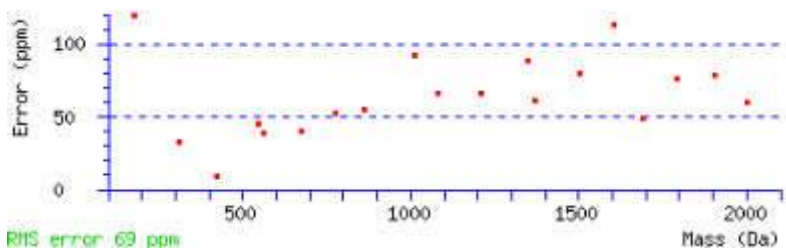

NCBI **BLAST** search of [AGADIVSVHCEQSSTIHLHR](#)

(Parameters: blastp, nr protein database, expect=20000, no filter, PAM30)

Other BLAST [web gateways](#)

#### All matches to this query

| Score | Mr(calc)  | Delta   | Sequence                             |
|-------|-----------|---------|--------------------------------------|
| 148.6 | 2216.0757 | 0.1102  | <a href="#">AGADIVSVHCEQSSTIHLHR</a> |
| 12.5  | 2216.1524 | 0.0334  | <a href="#">IHGKLAEMPFIATRPSYR</a>   |
| 12.3  | 2216.0875 | 0.0983  | <a href="#">GTRSTGNPHPIYNFLSYHR</a>  |
| 10.5  | 2216.0929 | 0.0929  | <a href="#">ELIGILNNNPEMSAECKLR</a>  |
| 7.5   | 2216.0202 | 0.1657  | <a href="#">MNYSNIQKVLGCSSTEVDK</a>  |
| 4.0   | 2216.0731 | 0.1127  | <a href="#">VFDIGEMARLCPHEHLHR</a>   |
| 3.9   | 2216.1082 | 0.0776  | <a href="#">GRTFQLTMASLLEMGYQVR</a>  |
| 3.9   | 2216.1082 | 0.0776  | <a href="#">GRTFQLTMASLLEMGYQVR</a>  |
| 2.6   | 2216.1915 | -0.0057 | <a href="#">YSLVSSKQMVGIFLTIWTK</a>  |
| 2.4   | 2216.0822 | 0.1037  | <a href="#">DAQVALDHLVQRTDIDTSR</a>  |





# Mascot Search Results

## Peptide View **Spot no 29**

MS/MS Fragmentation of **VIEAGANAIVAGSAVFGAPDYAEAIK**

Found in **gi|4105561** in **NCBIInr**, ribulose-5-phosphate-3-epimerase [*Oryza sativa*]

Match to Query 112: 2503.411624 from(2504.418900,1+) intensity(0.0000) index(34)

Title: Label: J20, Spot\_Id: 219987, Peak\_List\_Id: 229447, MSMS Job\_Run\_Id: 22021, Comment:

Data file C:\Documents and Settings\Administrator\Desktop\Farah-Garima 11May 2013\ppw\_J20\_136868359600.txt

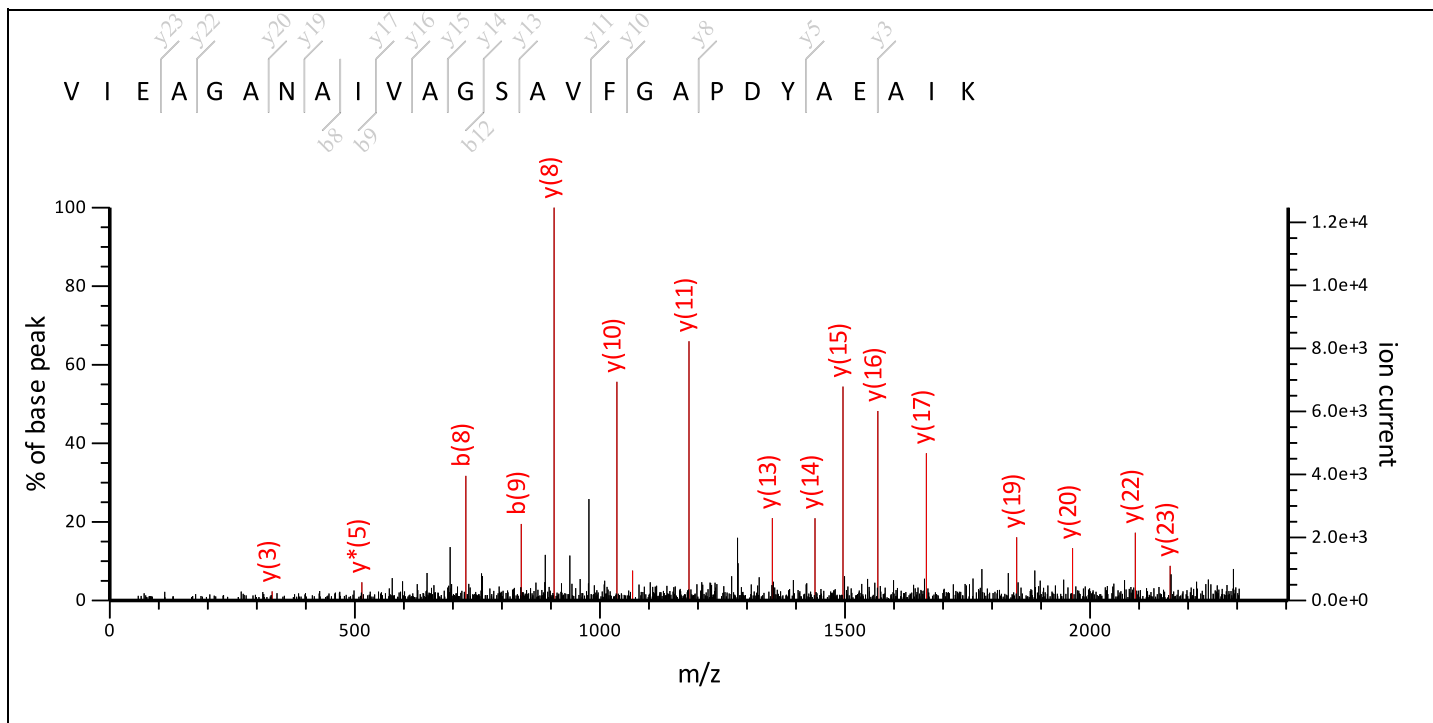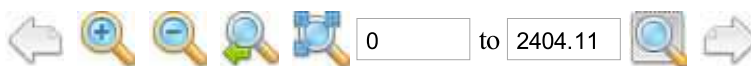

Label all possible matches  Label matches used for scoring

**Monoisotopic mass of neutral peptide Mr(calc):** 2503.2958

**Fixed modifications:** Carbamidomethyl (C) (apply to specified residues or termini only)

**Ions Score:** 102 **Expect:** 5.9e-08

**Matches :** 17/138 fragment ions using 23 most intense peaks ([help](#))

| # | a        | a*       | b               | b*       | Seq. | y                | y*        | #  |
|---|----------|----------|-----------------|----------|------|------------------|-----------|----|
| 1 | 72.0808  |          | 100.0757        |          | V    |                  |           | 26 |
| 2 | 185.1648 |          | 213.1598        |          | I    | 2405.2347        | 2388.2082 | 25 |
| 3 | 314.2074 |          | 342.2023        |          | E    | 2292.1507        | 2275.1241 | 24 |
| 4 | 385.2445 |          | 413.2395        |          | A    | <b>2163.1081</b> | 2146.0815 | 23 |
| 5 | 442.2660 |          | 470.2609        |          | G    | <b>2092.0709</b> | 2075.0444 | 22 |
| 6 | 513.3031 |          | 541.2980        |          | A    | 2035.0495        | 2018.0229 | 21 |
| 7 | 627.3461 | 610.3195 | 655.3410        | 638.3144 | N    | <b>1964.0124</b> | 1946.9858 | 20 |
| 8 | 698.3832 | 681.3566 | <b>726.3781</b> | 709.3515 | A    | <b>1849.9694</b> | 1832.9429 | 19 |

|    |           |           |                  |           |   |                  |                 |    |
|----|-----------|-----------|------------------|-----------|---|------------------|-----------------|----|
| 9  | 811.4672  | 794.4407  | <b>839.4621</b>  | 822.4356  | I | 1778.9323        | 1761.9058       | 18 |
| 10 | 910.5356  | 893.5091  | 938.5306         | 921.5040  | V | <b>1665.8483</b> | 1648.8217       | 17 |
| 11 | 981.5728  | 964.5462  | 1009.5677        | 992.5411  | A | <b>1566.7799</b> | 1549.7533       | 16 |
| 12 | 1038.5942 | 1021.5677 | <b>1066.5891</b> | 1049.5626 | G | <b>1495.7427</b> | 1478.7162       | 15 |
| 13 | 1125.6262 | 1108.5997 | 1153.6212        | 1136.5946 | S | <b>1438.7213</b> | 1421.6947       | 14 |
| 14 | 1196.6634 | 1179.6368 | 1224.6583        | 1207.6317 | A | <b>1351.6892</b> | 1334.6627       | 13 |
| 15 | 1295.7318 | 1278.7052 | 1323.7267        | 1306.7001 | V | 1280.6521        | 1263.6256       | 12 |
| 16 | 1442.8002 | 1425.7736 | 1470.7951        | 1453.7686 | F | <b>1181.5837</b> | 1164.5572       | 11 |
| 17 | 1499.8217 | 1482.7951 | 1527.8166        | 1510.7900 | G | <b>1034.5153</b> | 1017.4888       | 10 |
| 18 | 1570.8588 | 1553.8322 | 1598.8537        | 1581.8271 | A | 977.4938         | 960.4673        | 9  |
| 19 | 1667.9115 | 1650.8850 | 1695.9064        | 1678.8799 | P | <b>906.4567</b>  | 889.4302        | 8  |
| 20 | 1782.9385 | 1765.9119 | 1810.9334        | 1793.9068 | D | 809.4040         | 792.3774        | 7  |
| 21 | 1946.0018 | 1928.9753 | 1973.9967        | 1956.9702 | Y | 694.3770         | 677.3505        | 6  |
| 22 | 2017.0389 | 2000.0124 | 2045.0338        | 2028.0073 | A | 531.3137         | <b>514.2871</b> | 5  |
| 23 | 2146.0815 | 2129.0550 | 2174.0764        | 2157.0499 | E | 460.2766         | 443.2500        | 4  |
| 24 | 2217.1186 | 2200.0921 | 2245.1135        | 2228.0870 | A | <b>331.2340</b>  | 314.2074        | 3  |
| 25 | 2330.2027 | 2313.1761 | 2358.1976        | 2341.1711 | I | 260.1969         | 243.1703        | 2  |
| 26 |           |           |                  |           | K | 147.1128         | 130.0863        | 1  |

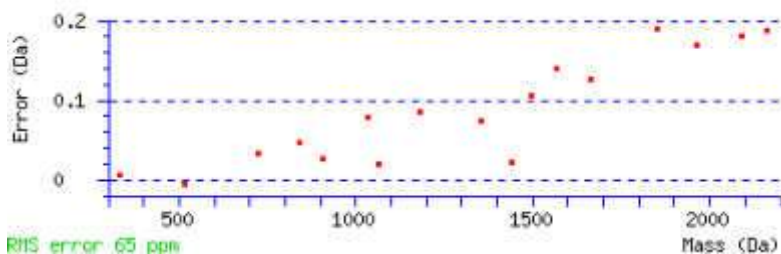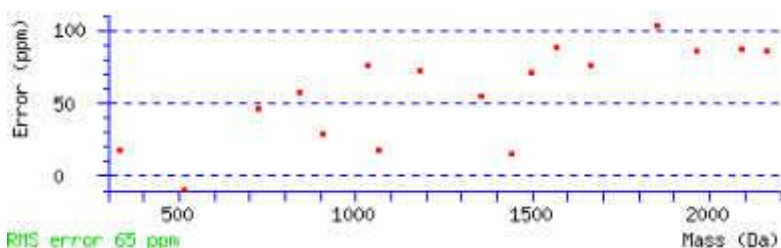

NCBI **BLAST** search of [VIEAGANAIVAGSAVFGAPDYAEAIIK](#)

(Parameters: blastp, nr protein database, expect=20000, no filter, PAM30)

Other BLAST [web gateways](#)

#### All matches to this query

| Score | Mr(calc)  | Delta  | Sequence                                    |
|-------|-----------|--------|---------------------------------------------|
| 101.9 | 2503.2958 | 0.1158 | <a href="#">VIEAGANAIVAGSAVFGAPDYAEAIIK</a> |
| 101.9 | 2503.2958 | 0.1158 | <a href="#">VIEAGANALVAGSAVFGAPDYAEAIIK</a> |
| 11.9  | 2503.3192 | 0.0924 | <a href="#">LHVPVGGDVAPPPHMLMLQINR</a>      |
| 6.3   | 2503.3608 | 0.0508 | <a href="#">SPDTLVALIVGVTGMVGFSLAEALK</a>   |
| 6.0   | 2503.2390 | 0.1726 | <a href="#">VSISQENHLGGSNVTAALPWMHR</a>     |

|     |           |         |                                                   |
|-----|-----------|---------|---------------------------------------------------|
| 1.3 | 2503.3369 | 0.0747  | <a href="#">MOSLQHQLPF<del>F</del>TLRPSPLEPLR</a> |
| 1.2 | 2503.3223 | 0.0893  | <a href="#">LGYVYQDV<del>D</del>IPWLTSKPTPRR</a>  |
| 0.2 | 2503.2410 | 0.1706  | <a href="#">QGITPEI<del>I</del>KELTDCNAMLSSQR</a> |
| 0.0 | 2503.4373 | -0.0257 | <a href="#">ITLEVIVLQIDN<del>N</del>QIEELLPRR</a> |

**Mascot:** <http://www.matrixscience.com/>



# Mascot Search Results

## Peptide View **Spot no 30**

### MS/MS Fragmentation of **IFLPEGLLDR**

Found in **gi|62733870** in **NCBI nr**, chlorophyll a/b-binding protein CP26 precursor - maize [Oryza sativa Japonica Group]

Match to Query 120: 1171.732724 from(1172.740000,1+) intensity(0.0000) index(10)

Title: Label: G8, Spot\_Id: 219792, Peak\_List\_Id: 226318, MSMS Job\_Run\_Id: 21840, Comment:

Data file C:\Documents and Settings\Administrator\Desktop\Farah-Garima 11May 2013\ppw\_G8\_136859928300.txt

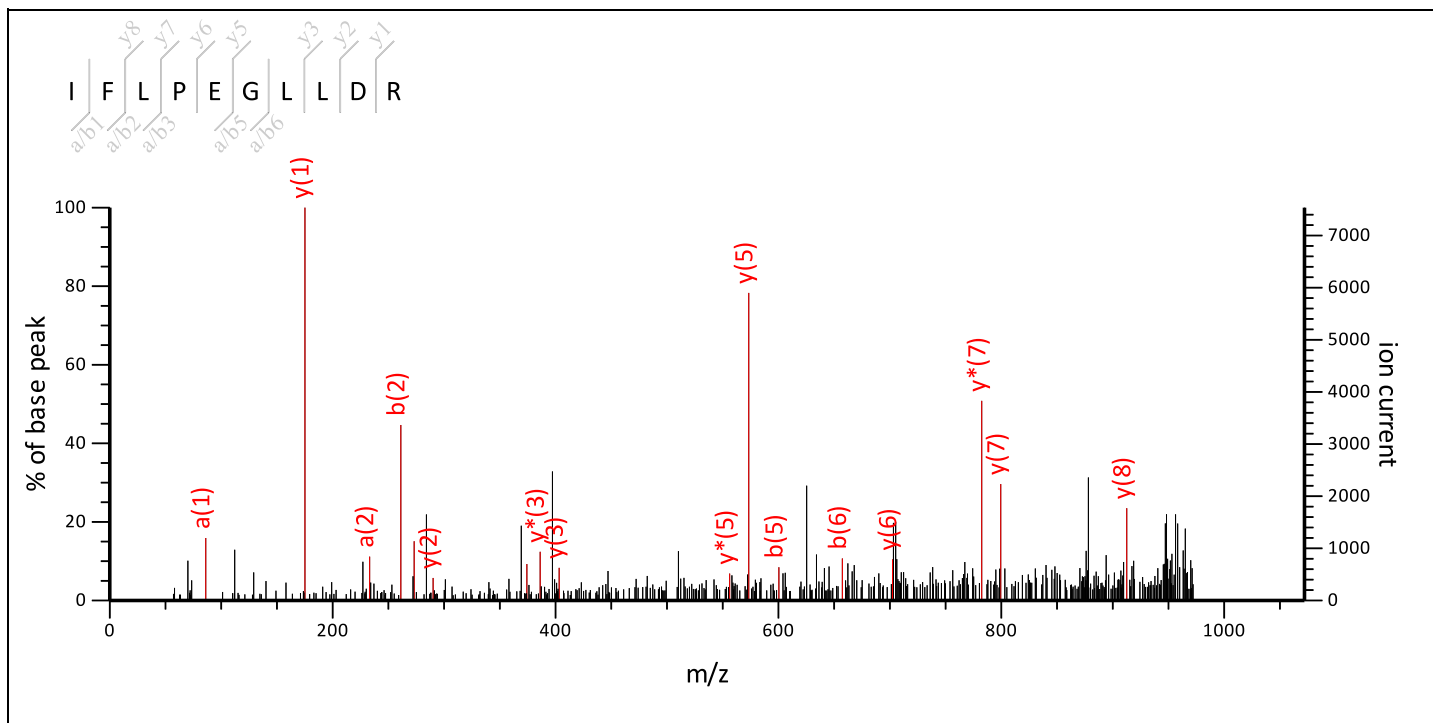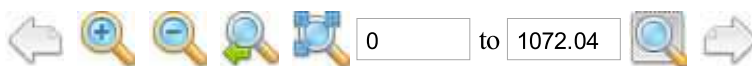

Label all possible matches  Label matches used for scoring

**Monoisotopic mass of neutral peptide Mr(calc):** 1171.6601

**Fixed modifications:** Carbamidomethyl (C) (apply to specified residues or termini only)

**Ions Score:** 26 **Expect:** 50

**Matches :** 17/36 fragment ions using 50 most intense peaks ([help](#))

| # | a        | b        | Seq. | y         | y*        | #  |
|---|----------|----------|------|-----------|-----------|----|
| 1 | 86.0964  | 114.0913 | I    |           |           | 10 |
| 2 | 233.1648 | 261.1598 | F    | 1059.5833 | 1042.5568 | 9  |
| 3 | 346.2489 | 374.2438 | L    | 912.5149  | 895.4884  | 8  |
| 4 | 443.3017 | 471.2966 | P    | 799.4308  | 782.4043  | 7  |
| 5 | 572.3443 | 600.3392 | E    | 702.3781  | 685.3515  | 6  |
| 6 | 629.3657 | 657.3606 | G    | 573.3355  | 556.3089  | 5  |
| 7 | 742.4498 | 770.4447 | L    | 516.3140  | 499.2875  | 4  |
| 8 | 855.5339 | 883.5288 | L    | 403.2300  | 386.2034  | 3  |



|    |          |          |   |          |          |   |
|----|----------|----------|---|----------|----------|---|
| 9  | 970.5608 | 998.5557 | D | 290.1459 | 273.1193 | 2 |
| 10 |          |          | R | 175.1190 | 158.0924 | 1 |

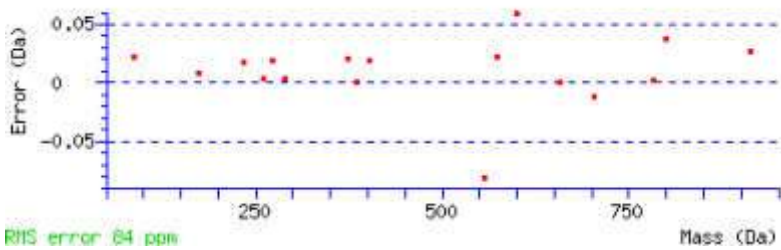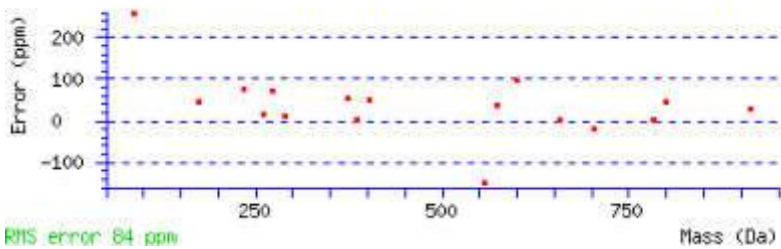

NCBI **BLAST** search of [IFLPEGLLDR](#)

(Parameters: blastp, nr protein database, expect=20000, no filter, PAM30)

Other BLAST [web gateways](#)

#### All matches to this query

| Score | Mr(calc)  | Delta   | Sequence                    |
|-------|-----------|---------|-----------------------------|
| 26.3  | 1171.6601 | 0.0726  | <a href="#">IFLPEGLLDR</a>  |
| 17.2  | 1171.7329 | -0.0001 | <a href="#">LFLLLPLSTR</a>  |
| 14.6  | 1171.7441 | -0.0114 | <a href="#">LFLLIAGAAKR</a> |
| 13.6  | 1171.6561 | 0.0767  | <a href="#">IIAATNTNLNK</a> |
| 13.3  | 1171.6635 | 0.0693  | <a href="#">ILMSLDVLP</a>   |
| 13.2  | 1171.6423 | 0.0904  | <a href="#">IFLPEPMGLR</a>  |
| 13.2  | 1171.7441 | -0.0114 | <a href="#">LFILLNGKVR</a>  |
| 13.2  | 1171.7441 | -0.0114 | <a href="#">LFILLREIR</a>   |
| 13.2  | 1171.6601 | 0.0726  | <a href="#">LFLLIPGDER</a>  |
| 13.2  | 1171.7362 | -0.0035 | <a href="#">LMLLLLATLR</a>  |

Mascot: <http://www.matrixscience.com/>



# Mascot Search Results

## Peptide View **Spot no 30**

### MS/MS Fragmentation of **YQAYELIHAR**

Found in **gi|62733870** in **NCBI nr**, chlorophyll a/b-binding protein CP26 precursor - maize [Oryza sativa Japonica Group]

Match to Query 131: 1262.721024 from(1263.728300,1+) intensity(0.0000) index(13)

Title: Label: G8, Spot\_Id: 219792, Peak\_List\_Id: 226319, MSMS Job\_Run\_Id: 21840, Comment:

Data file C:\Documents and Settings\Administrator\Desktop\Farah-Garima 11May 2013\ppw\_G8\_136859928300.txt

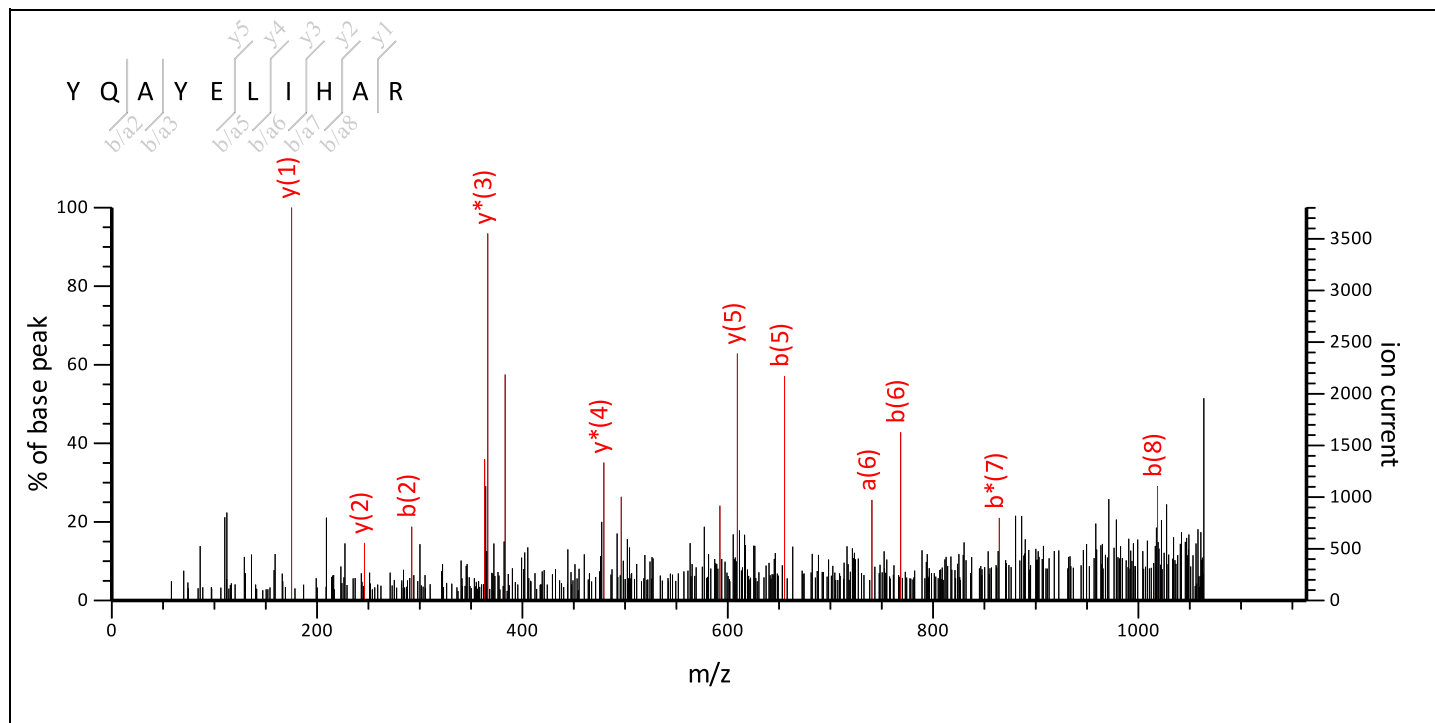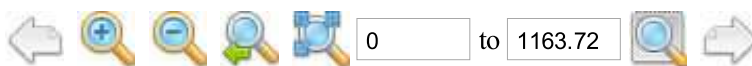

Label all possible matches  Label matches used for scoring

**Monoisotopic mass of neutral peptide Mr(calc):** 1262.6407

**Fixed modifications:** Carbamidomethyl (C) (apply to specified residues or termini only)

**Ions Score:** 23 **Expect:** 1.6e+02

**Matches :** 15/52 fragment ions using 33 most intense peaks ([help](#))

| # | a               | a*       | b                | b*              | Seq. | y               | y*              | #  |
|---|-----------------|----------|------------------|-----------------|------|-----------------|-----------------|----|
| 1 | 136.0757        |          | 164.0706         |                 | Y    |                 |                 | 10 |
| 2 | 264.1343        | 247.1077 | <b>292.1292</b>  | 275.1026        | Q    | 1100.5847       | 1083.5582       | 9  |
| 3 | 335.1714        | 318.1448 | <b>363.1663</b>  | 346.1397        | A    | 972.5261        | 955.4996        | 8  |
| 4 | 498.2347        | 481.2082 | 526.2296         | 509.2031        | Y    | 901.4890        | 884.4625        | 7  |
| 5 | 627.2773        | 610.2508 | <b>655.2722</b>  | 638.2457        | E    | 738.4257        | 721.3992        | 6  |
| 6 | <b>740.3614</b> | 723.3348 | <b>768.3563</b>  | 751.3297        | L    | <b>609.3831</b> | <b>592.3566</b> | 5  |
| 7 | 853.4454        | 836.4189 | 881.4403         | <b>864.4138</b> | I    | <b>496.2990</b> | <b>479.2725</b> | 4  |
| 8 | 990.5043        | 973.4778 | <b>1018.4993</b> | 1001.4727       | H    | <b>383.2150</b> | <b>366.1884</b> | 3  |

|    |           |           |           |           |   |                 |          |   |
|----|-----------|-----------|-----------|-----------|---|-----------------|----------|---|
| 9  | 1061.5415 | 1044.5149 | 1089.5364 | 1072.5098 | A | <b>246.1561</b> | 229.1295 | 2 |
| 10 |           |           |           |           | R | <b>175.1190</b> | 158.0924 | 1 |

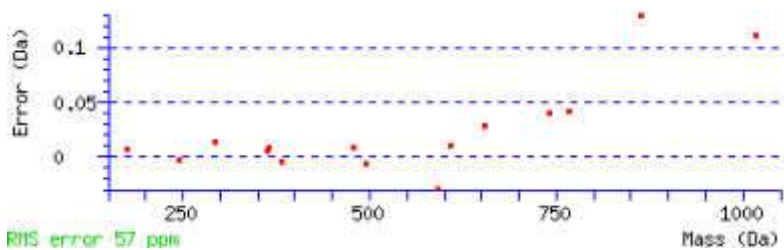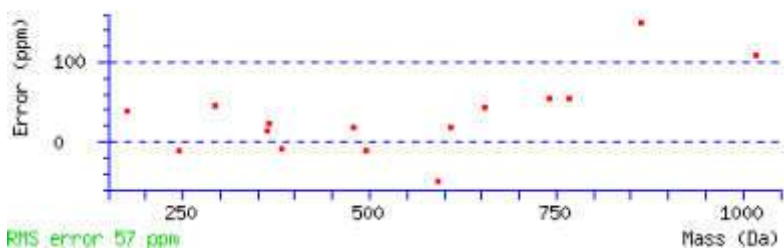

NCBI **BLAST** search of [YQAYELIHAR](#)

(Parameters: blastp, nr protein database, expect=20000, no filter, PAM30)

Other BLAST [web gateways](#)

#### All matches to this query

| Score | Mr(calc)  | Delta   | Sequence                     |
|-------|-----------|---------|------------------------------|
| 23.5  | 1262.6407 | 0.0803  | <a href="#">YQAYELIHAR</a>   |
| 17.1  | 1262.7247 | -0.0037 | <a href="#">HKEFIIHAR</a>    |
| 17.1  | 1262.6884 | 0.0327  | <a href="#">HQIFELIHAR</a>   |
| 17.1  | 1262.7207 | 0.0003  | <a href="#">NNVQAKLLHAR</a>  |
| 16.1  | 1262.7247 | -0.0037 | <a href="#">QHLLYLHAR</a>    |
| 15.4  | 1262.6441 | 0.0769  | <a href="#">LSGSMYLHLAR</a>  |
| 15.0  | 1262.7571 | -0.0361 | <a href="#">ARVGTAVLHLAR</a> |
| 15.0  | 1262.7571 | -0.0361 | <a href="#">GIGRSIALHLAR</a> |
| 14.9  | 1262.7207 | 0.0003  | <a href="#">AAGVEARLIHAR</a> |
| 14.3  | 1262.7095 | 0.0115  | <a href="#">LLIEGGANIHAR</a> |

Mascot: <http://www.matrixscience.com/>

# MATRIX SCIENCE Mascot Search Results

## Peptide View Spot no 30

MS/MS Fragmentation of **HLSDPFGNNLLTVISGAAER**

Found in **gi|62733870** in **NCBI nr**, chlorophyll a/b-binding protein CP26 precursor - maize [Oryza sativa Japonica Group]

Match to Query 251: 2110.183424 from(2111.190700,1+) intensity(0.0000) index(33)

Title: Label: G8, Spot\_Id: 219792, Peak\_List\_Id: 226327, MSMS Job\_Run\_Id: 21840, Comment:

Data file C:\Documents and Settings\Administrator\Desktop\Farah-Garima 11May 2013\ppw\_G8\_136859928300.txt

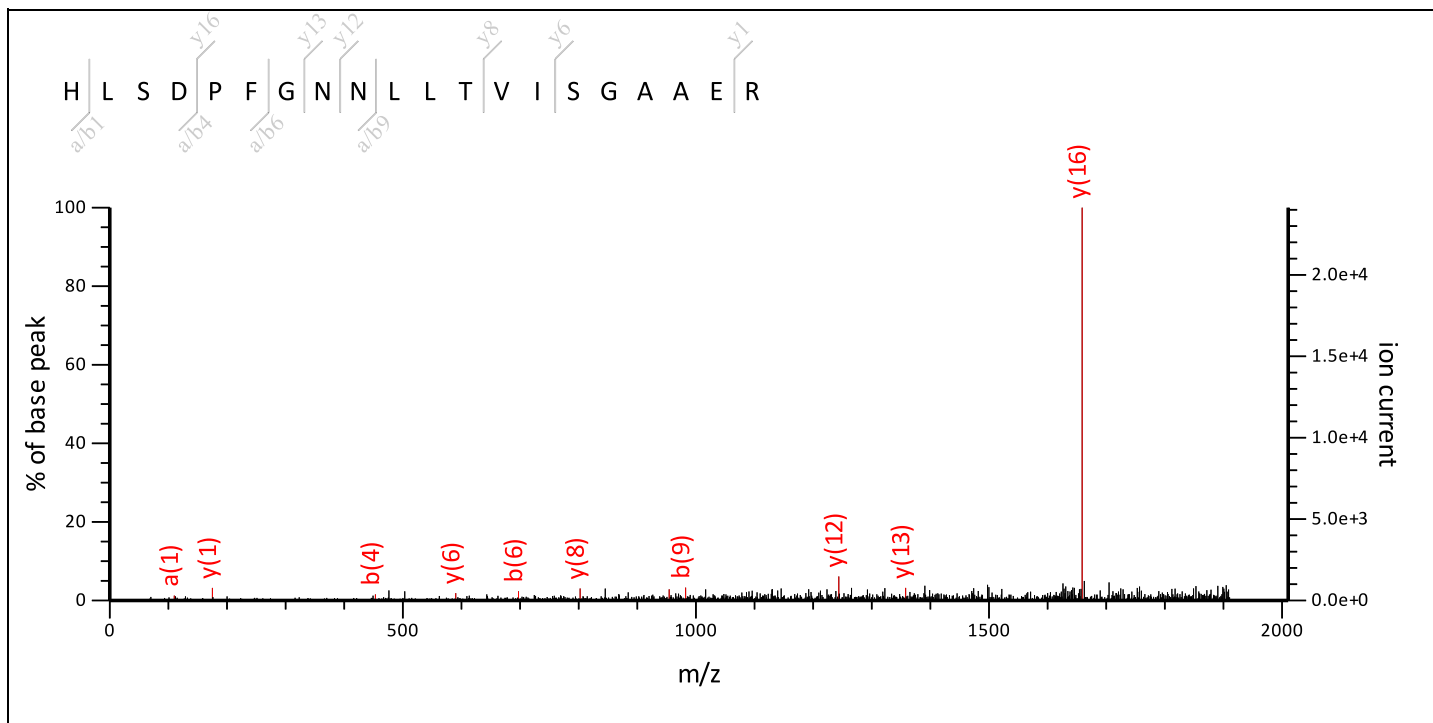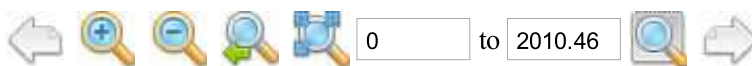

Label all possible matches  Label matches used for scoring

**Monoisotopic mass of neutral peptide Mr(calc):** 2110.0807

**Fixed modifications:** Carbamidomethyl (C) (apply to specified residues or termini only)

**Ions Score:** 29 **Expect:** 26

**Matches:** 11/100 fragment ions using 19 most intense peaks ([help](#))

| # | a               | a*       | b               | b*       | Seq. | y                | y*        | #  |
|---|-----------------|----------|-----------------|----------|------|------------------|-----------|----|
| 1 | <b>110.0713</b> |          | 138.0662        |          | H    |                  |           | 20 |
| 2 | 223.1553        |          | 251.1503        |          | L    | 1974.0291        | 1957.0025 | 19 |
| 3 | 310.1874        |          | 338.1823        |          | S    | 1860.9450        | 1843.9185 | 18 |
| 4 | 425.2143        |          | <b>453.2092</b> |          | D    | 1773.9130        | 1756.8864 | 17 |
| 5 | 522.2671        |          | 550.2620        |          | P    | <b>1658.8860</b> | 1641.8595 | 16 |
| 6 | 669.3355        |          | <b>697.3304</b> |          | F    | 1561.8333        | 1544.8067 | 15 |
| 7 | 726.3569        |          | 754.3519        |          | G    | 1414.7649        | 1397.7383 | 14 |
| 8 | 840.3999        | 823.3733 | 868.3948        | 851.3682 | N    | <b>1357.7434</b> | 1340.7169 | 13 |

|    |           |           |           |           |   |           |           |    |
|----|-----------|-----------|-----------|-----------|---|-----------|-----------|----|
| 9  | 954.4428  | 937.4163  | 982.4377  | 965.4112  | N | 1243.7005 | 1226.6739 | 12 |
| 10 | 1067.5269 | 1050.5003 | 1095.5218 | 1078.4952 | L | 1129.6576 | 1112.6310 | 11 |
| 11 | 1180.6109 | 1163.5844 | 1208.6058 | 1191.5793 | L | 1016.5735 | 999.5469  | 10 |
| 12 | 1281.6586 | 1264.6321 | 1309.6535 | 1292.6270 | T | 903.4894  | 886.4629  | 9  |
| 13 | 1380.7270 | 1363.7005 | 1408.7219 | 1391.6954 | V | 802.4417  | 785.4152  | 8  |
| 14 | 1493.8111 | 1476.7845 | 1521.8060 | 1504.7795 | I | 703.3733  | 686.3468  | 7  |
| 15 | 1580.8431 | 1563.8166 | 1608.8380 | 1591.8115 | S | 590.2893  | 573.2627  | 6  |
| 16 | 1637.8646 | 1620.8380 | 1665.8595 | 1648.8329 | G | 503.2572  | 486.2307  | 5  |
| 17 | 1708.9017 | 1691.8751 | 1736.8966 | 1719.8701 | A | 446.2358  | 429.2092  | 4  |
| 18 | 1779.9388 | 1762.9123 | 1807.9337 | 1790.9072 | A | 375.1987  | 358.1721  | 3  |
| 19 | 1908.9814 | 1891.9549 | 1936.9763 | 1919.9498 | E | 304.1615  | 287.1350  | 2  |
| 20 |           |           |           |           | R | 175.1190  | 158.0924  | 1  |

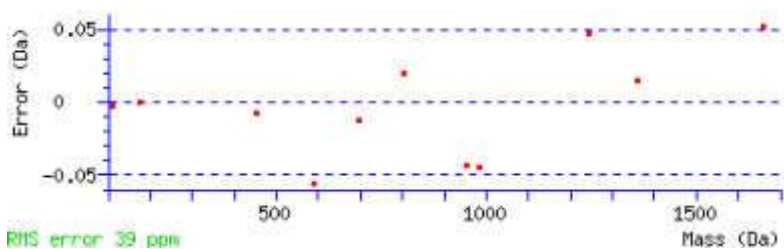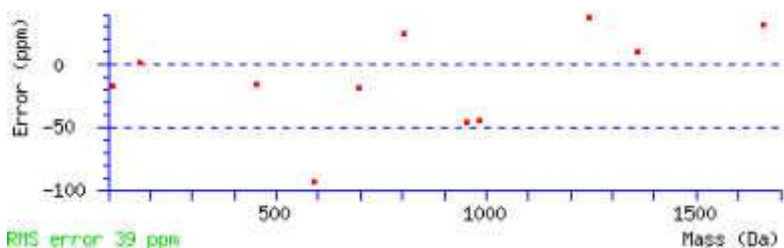

NCBI **BLAST** search of [HLSDPFGNNLLTVISGAAER](#)

(Parameters: blastp, nr protein database, expect=20000, no filter, PAM30)

Other BLAST [web gateways](#)

#### All matches to this query

| Score | Mr(calc)  | Delta  | Sequence                              |
|-------|-----------|--------|---------------------------------------|
| 28.8  | 2110.0807 | 0.1027 | <a href="#">HLSDPFGNNLLTVIAGSAER</a>  |
| 28.8  | 2110.0807 | 0.1027 | <a href="#">HLSDPFGNNLLTVISAGAER</a>  |
| 28.8  | 2110.0807 | 0.1027 | <a href="#">HLSDPFGNNLLTVISGAAER</a>  |
| 28.8  | 2110.0807 | 0.1027 | <a href="#">HLSDPFGNNLLTVLAGSAER</a>  |
| 9.2   | 2110.0192 | 0.1642 | <a href="#">ARQPDWVTASHSLVSEDGR</a>   |
| 8.9   | 2110.0742 | 0.1092 | <a href="#">QHGGNIIVATPGRLEDMFR</a>   |
| 6.9   | 2110.0847 | 0.0987 | <a href="#">ASALELPAASAYRLPFYDR</a>   |
| 5.2   | 2110.0153 | 0.1681 | <a href="#">YSDSMLSEPFSTKAAHIR</a>    |
| 5.0   | 2110.0551 | 0.1283 | <a href="#">MLQVPGFVASAGAASMLVSSR</a> |
| 5.0   | 2110.0881 | 0.0953 | <a href="#">LEPLQMTWGTLSPLGNTR</a>    |





# Mascot Search Results

## Peptide View **Spot no 32**

MS/MS Fragmentation of **FFVGGNWK**

Found in **gi|553107** in **NCBI**nr, triosephosphate isomerase, partial [Oryza sativa Japonica Group]

Match to Query 18: 953.513784 from(954.521060,1+) intensity(0.0000) index(2)

Title: Label: H19, Spot\_Id: 219969, Peak\_List\_Id: 229374, MSMS Job\_Run\_Id: 22019, Comment:

Data file C:\Documents and Settings\Administrator\Desktop\Farah-Garima 11May 2013\ppw\_H19\_136868348800.txt

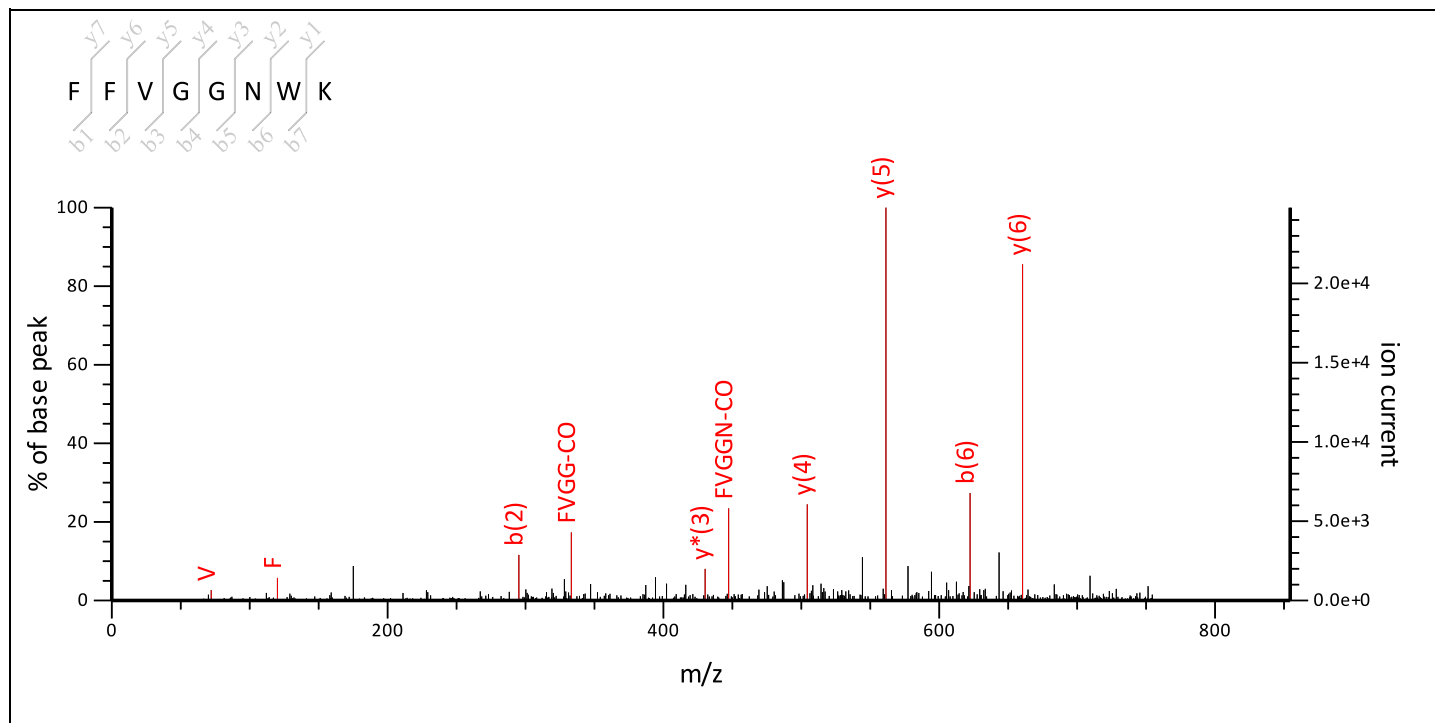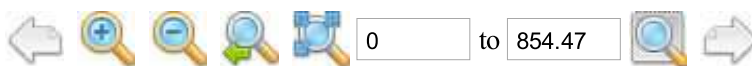

Label all possible matches  Label matches used for scoring

**Monoisotopic mass of neutral peptide Mr(calc):** 953.4760

**Fixed modifications:** Carbamidomethyl (C) (apply to specified residues or termini only)

**Ions Score:** 39 **Expect:** 3.6

**Matches :** 14/81 fragment ions using 14 most intense peaks ([help](#))

| # | Immon.   | a        | a*       | b        | b*       | d        | Seq. | v        | w        | y        | y*       | # |
|---|----------|----------|----------|----------|----------|----------|------|----------|----------|----------|----------|---|
| 1 | 120.0808 | 120.0808 |          | 148.0757 |          | 44.0495  | F    |          |          |          |          | 8 |
| 2 | 120.0808 | 267.1492 |          | 295.1441 |          |          | F    | 715.3522 |          | 807.4148 | 790.3883 | 7 |
| 3 | 72.0808  | 366.2176 |          | 394.2125 |          | 352.2020 | V    | 616.2838 | 629.3042 | 660.3464 | 643.3198 | 6 |
| 4 | 30.0338  | 423.2391 |          | 451.2340 |          |          | G    |          |          | 561.2780 | 544.2514 | 5 |
| 5 | 30.0338  | 480.2605 |          | 508.2554 |          |          | G    |          |          | 504.2565 | 487.2300 | 4 |
| 6 | 87.0553  | 594.3035 | 577.2769 | 622.2984 | 605.2718 | 551.2976 | N    | 388.1979 | 387.2027 | 447.2350 | 430.2085 | 3 |
| 7 | 159.0917 | 780.3828 | 763.3562 | 808.3777 | 791.3511 |          | W    | 202.1186 |          | 333.1921 | 316.1656 | 2 |
| 8 | 101.1073 |          |          |          |          |          | K    | 74.0237  | 73.0284  | 147.1128 | 130.0863 | 1 |



| Seq          | ya       | yb       | Seq           | ya       | yb       | Seq          | ya       | yb       |
|--------------|----------|----------|---------------|----------|----------|--------------|----------|----------|
| <b>FV</b>    | 219.1492 | 247.1441 | <b>FVG</b>    | 276.1707 | 304.1656 | <b>FVGG</b>  | 333.1921 | 361.1870 |
| <b>FVGGN</b> | 447.2350 | 475.2300 | <b>FVGGNW</b> | 633.3144 | 661.3093 | <b>VG</b>    | 129.1022 | 157.0972 |
| <b>VGG</b>   | 186.1237 | 214.1186 | <b>VGGN</b>   | 300.1666 | 328.1615 | <b>VGGNW</b> | 486.2459 | 514.2409 |
| <b>GG</b>    | 87.0553  | 115.0502 | <b>GGN</b>    | 201.0982 | 229.0931 | <b>GGNW</b>  | 387.1775 | 415.1724 |
| <b>GN</b>    | 144.0768 | 172.0717 | <b>GNW</b>    | 330.1561 | 358.1510 | <b>NW</b>    | 273.1346 | 301.1295 |

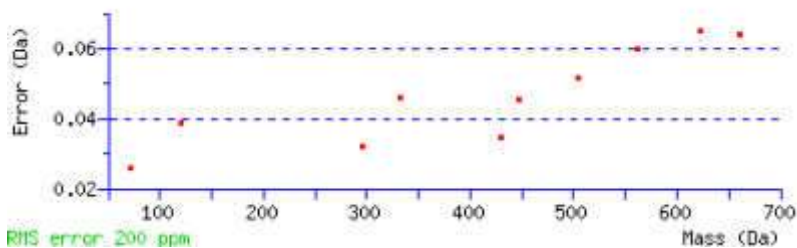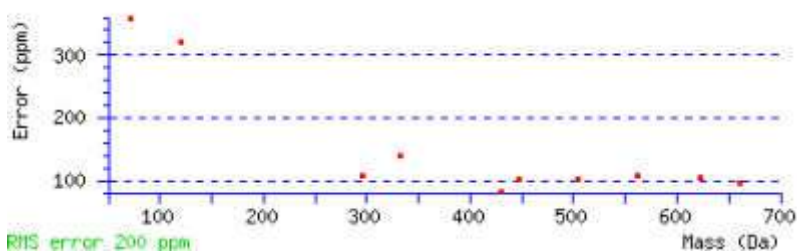

NCBI **BLAST** search of [FFVGGNWK](#)

(Parameters: blastp, nr protein database, expect=20000, no filter, PAM30)

Other BLAST [web gateways](#)

#### All matches to this query

| Score | Mr(calc) | Delta  | Sequence                  |
|-------|----------|--------|---------------------------|
| 39.3  | 953.4760 | 0.0378 | <a href="#">FFVGGNWK</a>  |
| 39.3  | 953.4760 | 0.0378 | <a href="#">FFVGGNWK</a>  |
| 39.0  | 953.4389 | 0.0749 | <a href="#">MFVNSANR</a>  |
| 35.4  | 953.4389 | 0.0749 | <a href="#">VMYGGNASR</a> |
| 34.2  | 953.5083 | 0.0055 | <a href="#">FFVNGSKR</a>  |
| 34.2  | 953.4641 | 0.0497 | <a href="#">MFVEVASR</a>  |
| 30.1  | 953.4640 | 0.0497 | <a href="#">MYVVESAR</a>  |
| 28.9  | 953.4858 | 0.0279 | <a href="#">FFVDIDAK</a>  |
| 28.6  | 953.4202 | 0.0935 | <a href="#">TYENNSAR</a>  |
| 26.2  | 953.4277 | 0.0861 | <a href="#">FMVGAEER</a>  |

Mascot: <http://www.matrixscience.com/>

**MATRIX SCIENCE Mascot Search Results**

**Peptide View Spot no 32**

MS/MS Fragmentation of **IYGGSVTGANCK**

Found in **gi553107** in **NCBI nr**, triosephosphate isomerase, partial [Oryza sativa Japonica Group]

Match to Query 81: 1338.724624 from(1339.731900,1+) intensity(0.0000) index(15)

Title: Label: H19, Spot\_Id: 219969, Peak\_List\_Id: 229382, MSMS Job\_Run\_Id: 22019, Comment:

Data file C:\Documents and Settings\Administrator\Desktop\Farah-Garima 11May 2013\ppw\_H19\_136868348800.txt

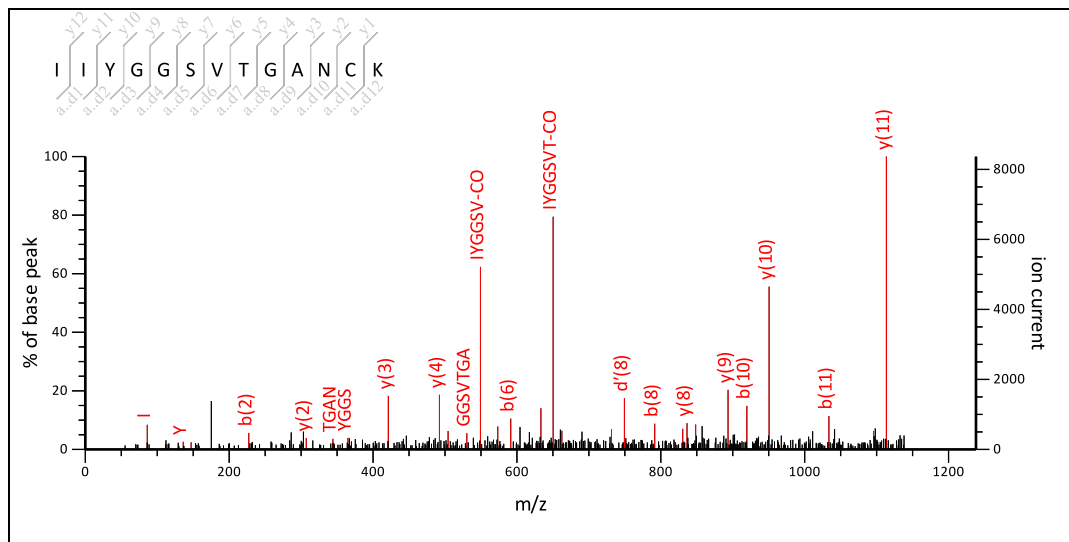

Navigation icons: Home, Back, Forward, Search, etc. Range: 0 to 1238.14

Label all possible matches  Label matches used for scoring

Monoisotopic mass of neutral peptide Mr(calc): 1338.6602

Fixed modifications: Carbamidomethyl (C) (apply to specified residues or termini only)

Ions Score: 89 Expect: 4e-05

Matches : 37/207 fragment ions using 44 most intense peaks [\(help\)](#)

| #  | Immon.   | a         | a*        | a <sup>0</sup> | b         | b*        | b <sup>0</sup> | d         | d'       | Seq. | v         | w         | w'        | y         | y*        |
|----|----------|-----------|-----------|----------------|-----------|-----------|----------------|-----------|----------|------|-----------|-----------|-----------|-----------|-----------|
| 1  | 86.0964  | 86.0964   |           |                | 114.0913  |           |                | 44.0495   |          | I    |           |           |           |           |           |
| 2  | 86.0964  | 199.1805  |           |                | 227.1754  |           |                | 171.1492  | 185.1648 | I    | 1168.5051 | 1181.5256 | 1195.5412 | 1226.5834 | 1209.5569 |
| 3  | 136.0757 | 362.2438  |           |                | 390.2387  |           |                |           |          | Y    | 1005.4418 |           |           | 1113.4993 | 1096.4728 |
| 4  | 30.0338  | 419.2653  |           |                | 447.2602  |           |                |           |          | G    |           |           |           | 950.4360  | 933.4095  |
| 5  | 30.0338  | 476.2867  |           |                | 504.2817  |           |                |           |          | G    |           |           |           | 893.4145  | 876.3880  |
| 6  | 60.0444  | 563.3188  |           | 545.3082       | 591.3137  |           | 573.3031       | 547.3239  |          | S    | 804.3669  | 803.3716  |           | 836.3931  | 819.3665  |
| 7  | 72.0808  | 662.3872  |           | 644.3766       | 690.3821  |           | 672.3715       | 648.3715  |          | V    | 705.2985  | 718.3189  |           | 749.3611  | 732.3345  |
| 8  | 74.0600  | 763.4349  |           | 745.4243       | 791.4298  |           | 773.4192       | 747.4400  | 749.4192 | T    | 604.2508  | 617.2712  | 619.2504  | 650.2926  | 633.2661  |
| 9  | 30.0338  | 820.4563  |           | 802.4458       | 848.4512  |           | 830.4407       |           |          | G    |           |           |           | 549.2450  | 532.2184  |
| 10 | 44.0495  | 891.4934  |           | 873.4829       | 919.4884  |           | 901.4778       |           |          | A    | 476.1922  |           |           | 492.2235  | 475.1969  |
| 11 | 87.0553  | 1005.5364 | 988.5098  | 987.5258       | 1033.5313 | 1016.5047 | 1015.5207      | 962.5306  |          | N    | 362.1493  | 361.1540  |           | 421.1864  | 404.1598  |
| 12 | 133.0430 | 1165.5670 | 1148.5405 | 1147.5565      | 1193.5619 | 1176.5354 | 1175.5514      | 1076.5735 |          | C    | 202.1186  | 201.1234  |           | 307.1435  | 290.1169  |
| 13 | 101.1073 |           |           |                |           |           |                |           |          | K    | 74.0237   | 73.0284   |           | 147.1128  | 130.0863  |

| Seq     | ya       | yb       | Seq    | ya       | yb       | Seq     | ya       | yb       |
|---------|----------|----------|--------|----------|----------|---------|----------|----------|
| IY      | 249.1598 | 277.1547 | IYG    | 306.1812 | 334.1761 | IYGG    | 363.2027 | 391.1976 |
| IYGG    | 450.2347 | 478.2296 | IYGGSV | 549.3031 | 577.2980 | IYGGSVT | 650.3508 | 678.3457 |
| YG      | 193.0972 | 221.0921 | YGG    | 250.1186 | 278.1135 | YGG     | 337.1506 | 365.1456 |
| YGG     | 337.1506 | 365.1456 | YGGSV  | 436.2191 | 464.2140 | YGGSVT  | 537.2667 | 565.2617 |
| YGGSV   | 436.2191 | 464.2140 | YGGSVT | 537.2667 | 565.2617 | YGGSVTG | 594.2882 | 622.2831 |
| YGGSVTG | 594.2882 | 622.2831 | GG     | 87.0553  | 115.0502 | GGS     | 174.0873 | 202.0822 |
| GG      | 87.0553  | 115.0502 | GGS    | 174.0873 | 202.0822 | GGSV    | 273.1557 | 301.1506 |
| GGS     | 174.0873 | 202.0822 | GGSV   | 273.1557 | 301.1506 | GGSVT   | 374.2034 | 402.1983 |
| GGSV    | 273.1557 | 301.1506 | GGSVT  | 374.2034 | 402.1983 | GGSVTG  | 431.2249 | 459.2198 |
| GGSVT   | 374.2034 | 402.1983 | GGSVTG | 431.2249 | 459.2198 | GS      | 117.0659 | 145.0608 |
| GGSVTG  | 431.2249 | 459.2198 | GS     | 117.0659 | 145.0608 | GSV     | 216.1343 | 244.1292 |
| GS      | 117.0659 | 145.0608 | GSV    | 216.1343 | 244.1292 | GSVT    | 317.1819 | 345.1769 |
| GSV     | 216.1343 | 244.1292 | GSVT   | 317.1819 | 345.1769 | GSVTG   | 374.2034 | 402.1983 |

|                        |          |                          |                         |                          |                          |                       |          |          |
|------------------------|----------|--------------------------|-------------------------|--------------------------|--------------------------|-----------------------|----------|----------|
| <a href="#">GSVTGA</a> | 445.2405 | 473.2354                 | <a href="#">GSVTGAN</a> | 559.2835                 | 587.2784                 | <a href="#">SV</a>    | 159.1128 | 187.1077 |
| <a href="#">SVT</a>    | 260.1605 | 288.1554                 | <a href="#">SVTG</a>    | 317.1819                 | 345.1769                 | <a href="#">SVTGA</a> | 388.2191 | 416.2140 |
| <a href="#">SVTGAN</a> | 502.2620 | <a href="#">530.2569</a> | <a href="#">SVTGANC</a> | <a href="#">662.2926</a> | 690.2876                 | <a href="#">VT</a>    | 173.1285 | 201.1234 |
| <a href="#">VTG</a>    | 230.1499 | 258.1448                 | <a href="#">VTGA</a>    | 301.1870                 | 329.1819                 | <a href="#">VTGAN</a> | 415.2300 | 443.2249 |
| <a href="#">VTGANC</a> | 575.2606 | 603.2555                 | <a href="#">TG</a>      | 131.0815                 | 159.0764                 | <a href="#">TGA</a>   | 202.1186 | 230.1135 |
| <a href="#">TGAN</a>   | 316.1615 | <a href="#">344.1565</a> | <a href="#">TGANC</a>   | 476.1922                 | <a href="#">504.1871</a> | <a href="#">GA</a>    | 101.0709 | 129.0659 |
| <a href="#">GAN</a>    | 215.1139 | 243.1088                 | <a href="#">GANC</a>    | 375.1445                 | 403.1394                 | <a href="#">AN</a>    | 158.0924 | 186.0873 |
| <a href="#">ANC</a>    | 318.1231 | 346.1180                 | <a href="#">NC</a>      | 247.0859                 | 275.0809                 |                       |          |          |

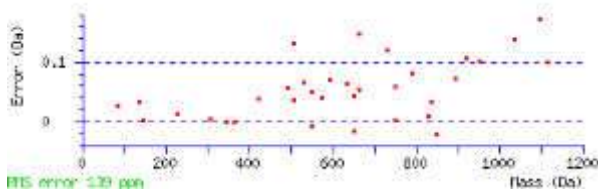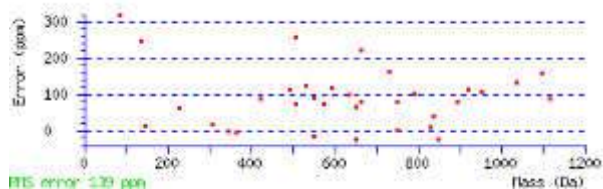

NCBI BLAST search of [IIYGGSVTGANCK](#)

(Parameters: blastp, nr protein database, expect=20000, no filter, PAM30)

Other BLAST [web gateways](#)

#### All matches to this query

| Score | Mr(calc)  | Delta   | Sequence                      |
|-------|-----------|---------|-------------------------------|
| 89.1  | 1338.6602 | 0.0644  | <a href="#">IIYGGSVTGANCK</a> |
| 89.1  | 1338.6602 | 0.0644  | <a href="#">IIYGGSVTGANCK</a> |
| 77.7  | 1338.6602 | 0.0644  | <a href="#">IIYGGSVTGANCK</a> |
| 77.7  | 1338.6602 | 0.0644  | <a href="#">IIYGGSVTGANCK</a> |
| 76.2  | 1338.6602 | 0.0645  | <a href="#">IIYGGSVSAANCK</a> |
| 76.2  | 1338.6602 | 0.0645  | <a href="#">IIYGGSVSAANCK</a> |
| 32.8  | 1338.6714 | 0.0532  | <a href="#">MLENSPHVIQR</a>   |
| 30.5  | 1338.6932 | 0.0314  | <a href="#">IYHYTVNSSKK</a>   |
| 29.9  | 1338.7296 | -0.0049 | <a href="#">LNYLGETKQVR</a>   |
| 29.5  | 1338.6833 | 0.0413  | <a href="#">NQFNWSIFKR</a>    |

Mascot: <http://www.matrixscience.com/>

**MATRIX SCIENCE Mascot Search Results**

**Peptide View Spot no 32**

**MS/MS Fragmentation of VIACVGETLEQR**

Found in **gi553107** in **NCBINr**, triosephosphate isomerase, partial [Oryza sativa Japonica Group]

Match to Query 87: 1373.778124 from(1374.785400,1+) intensity(0.0000) index(16)

Title: Label: H19, Spot\_Id: 219969, Peak\_List\_Id: 229376, MSMS Job\_Run\_Id: 22019, Comment:

Data file C:\Documents and Settings\Administrator\Desktop\Farah-Garima 11May 2013\ppw\_H19\_136868348800.txt

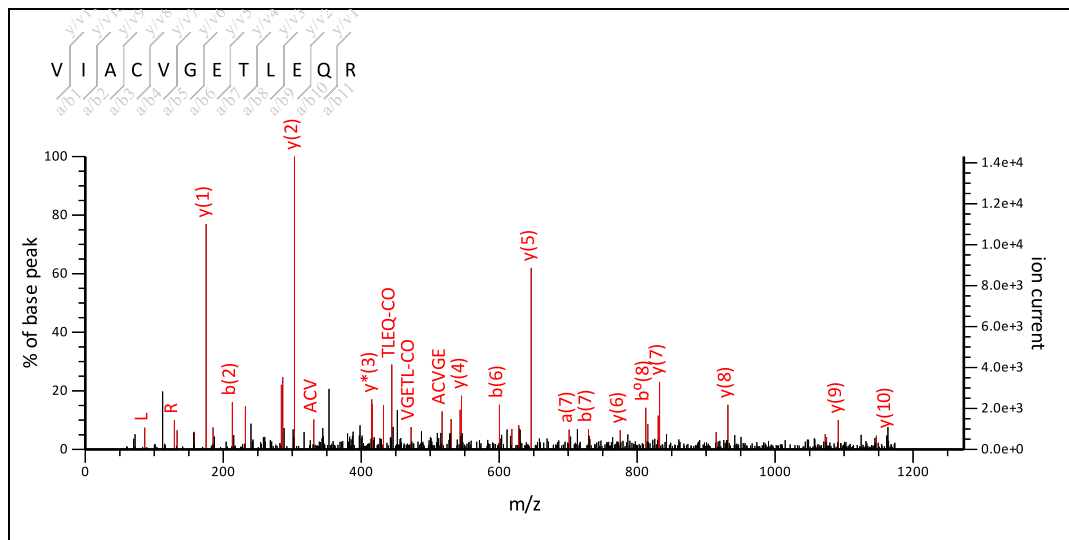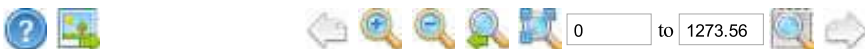

Label all possible matches  Label matches used for scoring

Monoisotopic mass of neutral peptide Mr(calc): 1373.6973

Fixed modifications: Carbamidomethyl (C) (apply to specified residues or termini only)

Ions Score: 72 Expect: 0.0018

Matches : 53/179 fragment ions using 60 most intense peaks [\(help\)](#)

| #  | Immon.   | a         | a*        | a <sup>0</sup> | b         | b*        | b <sup>0</sup> | d         | d'       | Seq. | v         | w         | w'        | y         | y*        |
|----|----------|-----------|-----------|----------------|-----------|-----------|----------------|-----------|----------|------|-----------|-----------|-----------|-----------|-----------|
| 1  | 72.0808  | 72.0808   |           |                | 100.0757  |           |                | 44.0495   |          | V    |           |           |           |           |           |
| 2  | 86.0964  | 185.1648  |           |                | 213.1598  |           |                | 157.1335  | 171.1492 | I    | 1217.5579 | 1230.5783 | 1244.5940 | 1275.6362 | 1258.6096 |
| 3  | 44.0495  | 256.2020  |           |                | 284.1969  |           |                |           |          | A    | 1146.5208 |           |           | 1162.5521 | 1145.5256 |
| 4  | 133.0430 | 416.2326  |           |                | 444.2275  |           |                | 327.2391  |          | C    | 986.4902  | 985.4949  |           | 1091.5150 | 1074.4884 |
| 5  | 72.0808  | 515.3010  |           |                | 543.2959  |           |                | 501.2854  |          | V    | 887.4217  | 900.4421  |           | 931.4843  | 914.4578  |
| 6  | 30.0338  | 572.3225  |           |                | 600.3174  |           |                |           |          | G    |           |           |           | 832.4159  | 815.3894  |
| 7  | 102.0550 | 701.3651  |           | 683.3545       | 729.3600  |           | 711.3494       | 643.3596  |          | E    | 701.3577  | 700.3624  |           | 775.3945  | 758.3679  |
| 8  | 74.0600  | 802.4128  |           | 784.4022       | 830.4077  |           | 812.3971       | 786.4178  | 788.3971 | T    | 600.3100  | 613.3304  | 615.3097  | 646.3519  | 629.3253  |
| 9  | 86.0964  | 915.4968  |           | 897.4863       | 943.4917  |           | 925.4812       | 873.4499  |          | L    | 487.2259  | 486.2307  |           | 545.3042  | 528.2776  |
| 10 | 102.0550 | 1044.5394 |           | 1026.5288      | 1072.5343 |           | 1054.5238      | 986.5339  |          | E    | 358.1833  | 357.1881  |           | 432.2201  | 415.1936  |
| 11 | 101.0709 | 1172.5980 | 1155.5714 | 1154.5874      | 1200.5929 | 1183.5664 | 1182.5823      | 1115.5765 |          | Q    | 230.1248  | 229.1295  |           | 303.1775  | 286.1510  |
| 12 | 129.1135 |           |           |                |           |           |                |           |          | R    | 74.0237   | 73.0284   |           | 175.1190  | 158.0924  |

| Seq    | ya       | yb       | Seq    | ya       | yb       | Seq    | ya       | yb       |
|--------|----------|----------|--------|----------|----------|--------|----------|----------|
| IA     | 157.1335 | 185.1285 | IAC    | 317.1642 | 345.1591 | IACV   | 416.2326 | 444.2275 |
| IACVG  | 473.2541 | 501.2490 | IACVGE | 602.2967 | 630.2916 | AC     | 204.0801 | 232.0750 |
| ACV    | 303.1485 | 331.1435 | ACVG   | 360.1700 | 388.1649 | ACVGE  | 489.2126 | 517.2075 |
| ACVGET | 590.2603 | 618.2552 | CV     | 232.1114 | 260.1063 | CVG    | 289.1329 | 317.1278 |
| CVGE   | 418.1755 | 446.1704 | CVGET  | 519.2232 | 547.2181 | CVGETL | 632.3072 | 660.3021 |
| VG     | 129.1022 | 157.0972 | VGE    | 258.1448 | 286.1397 | VGET   | 359.1925 | 387.1874 |
| VGETL  | 472.2766 | 500.2715 | VGETLE | 601.3192 | 629.3141 | GE     | 159.0764 | 187.0713 |
| GET    | 260.1241 | 288.1190 | GETL   | 373.2082 | 401.2031 | GETLE  | 502.2508 | 530.2457 |
| GETLEQ | 630.3093 | 658.3042 | ET     | 203.1026 | 231.0975 | ETL    | 316.1867 | 344.1816 |

|                      |          |          |                       |                 |                 |                    |          |          |
|----------------------|----------|----------|-----------------------|-----------------|-----------------|--------------------|----------|----------|
| <a href="#">ETLE</a> | 445.2293 | 473.2242 | <a href="#">ETLEQ</a> | 573.2879        | 601.2828        | <a href="#">TL</a> | 187.1441 | 215.1390 |
| <a href="#">TLE</a>  | 316.1867 | 344.1816 | <a href="#">TLEQ</a>  | <b>444.2453</b> | <b>472.2402</b> | <a href="#">LE</a> | 215.1390 | 243.1339 |
| <a href="#">LEQ</a>  | 343.1976 | 371.1925 | <a href="#">EQ</a>    | 230.1135        | 258.1084        |                    |          |          |

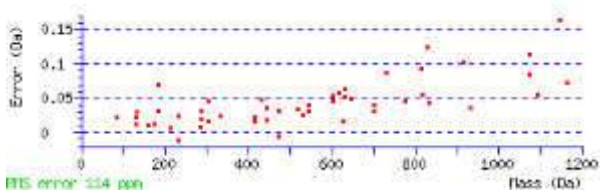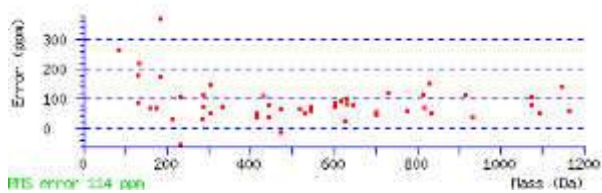

NCBI BLAST search of [VIACVGETLEQR](#)

(Parameters: blastp, nr protein database, expect=20000, no filter, PAM30)

Other BLAST [web gateways](#)

All matches to this query

| Score | Mr(calc)  | Delta  | Sequence                       |
|-------|-----------|--------|--------------------------------|
| 72.3  | 1373.6973 | 0.0808 | <a href="#">VIACVGETLEQR</a>   |
| 58.4  | 1373.6973 | 0.0808 | <a href="#">VIACVGETLQER</a>   |
| 48.9  | 1373.6722 | 0.1060 | <a href="#">VGGDDVMREQLR</a>   |
| 48.0  | 1373.6973 | 0.0808 | <a href="#">GPGSMVTIAEIAGR</a> |
| 46.5  | 1373.7085 | 0.0696 | <a href="#">LTNDVMERLAGR</a>   |
| 42.5  | 1373.7489 | 0.0292 | <a href="#">IETAGAWMVLKR</a>   |
| 42.5  | 1373.7085 | 0.0696 | <a href="#">ENLEGMLARIR</a>    |
| 42.2  | 1373.6787 | 0.0995 | <a href="#">ETTNVDDLAQLR</a>   |
| 42.0  | 1373.7262 | 0.0519 | <a href="#">LTASAAERSALER</a>  |
| 40.2  | 1373.7514 | 0.0267 | <a href="#">LTASAVLSAGITDR</a> |

Mascot: <http://www.matrixscience.com/>

**MATRIX SCIENCE Mascot Search Results**

**Peptide View Spot no 32**

MS/MS Fragmentation of **WLAANVSAEVAESTR**

Found in **gi553107** in **NCBItr**, triosephosphate isomerase, partial [Oryza sativa Japonica Group]

Match to Query 121: 1602.898224 from(1603.905500,1+) intensity(0.0000) index(25)

Title: Label: H19, Spot\_Id: 219969, Peak\_List\_Id: 229381, MSMS Job\_Run\_Id: 22019, Comment:

Data file C:\Documents and Settings\Administrator\Desktop\Farah-Garima 11May 2013\ppw\_H19\_136868348800.txt

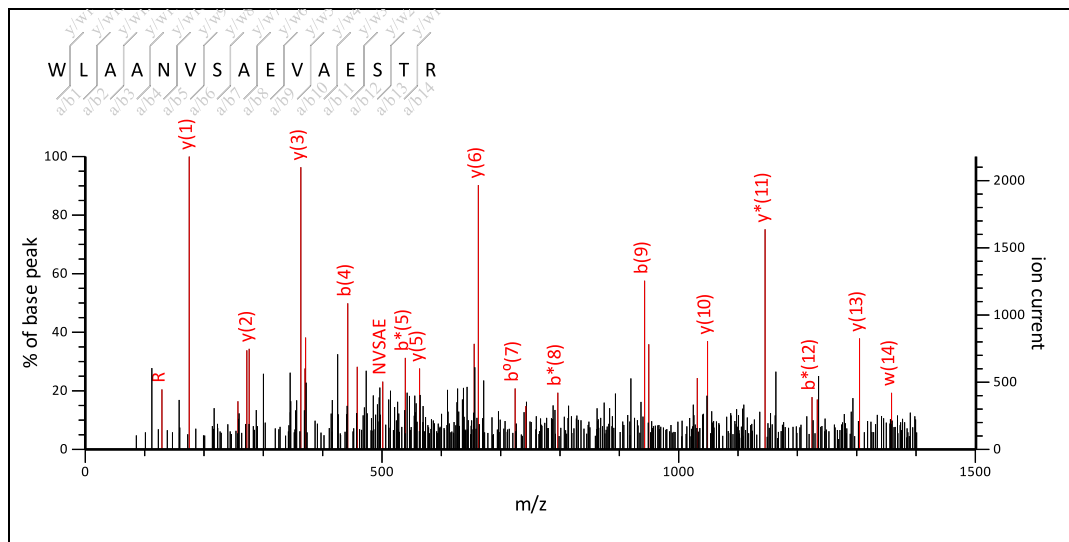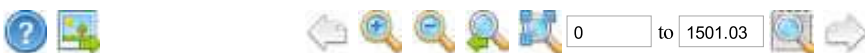

Label all possible matches  Label matches used for scoring

Monoisotopic mass of neutral peptide Mr(calc): 1602.8002

Fixed modifications: Carbamidomethyl (C) (apply to specified residues or termini only)

Ions Score: 58 Expect: 0.045

Matches : 33/270 fragment ions using 42 most intense peaks [\(help\)](#)

| #  | Immon.   | a         | a*        | a <sup>0</sup> | b         | b*        | b <sup>0</sup> | d         | d'        | Seq. | v         | w         | w'       | y         | y*        |
|----|----------|-----------|-----------|----------------|-----------|-----------|----------------|-----------|-----------|------|-----------|-----------|----------|-----------|-----------|
| 1  | 159.0917 | 159.0917  |           |                | 187.0866  |           |                | 44.0495   |           | W    |           |           |          |           |           |
| 2  | 86.0964  | 272.1757  |           |                | 300.1707  |           |                | 230.1288  |           | L    | 1359.6499 | 1358.6546 |          | 1417.7281 | 1400.7016 |
| 3  | 44.0495  | 343.2129  |           |                | 371.2078  |           |                |           |           | A    | 1288.6128 |           |          | 1304.6441 | 1287.6175 |
| 4  | 44.0495  | 414.2500  |           |                | 442.2449  |           |                |           |           | A    | 1217.5757 |           |          | 1233.6070 | 1216.5804 |
| 5  | 87.0553  | 528.2929  | 511.2663  |                | 556.2878  | 539.2613  |                | 485.2871  |           | N    | 1103.5327 | 1102.5375 |          | 1162.5699 | 1145.5433 |
| 6  | 72.0808  | 627.3613  | 610.3348  |                | 655.3562  | 638.3297  |                | 613.3457  |           | V    | 1004.4643 | 1017.4847 |          | 1048.5269 | 1031.5004 |
| 7  | 60.0444  | 714.3933  | 697.3668  | 696.3828       | 742.3882  | 725.3617  | 724.3777       | 698.3984  |           | S    | 917.4323  | 916.4371  |          | 949.4585  | 932.4320  |
| 8  | 44.0495  | 785.4304  | 768.4039  | 767.4199       | 813.4254  | 796.3988  | 795.4148       |           |           | A    | 846.3952  |           |          | 862.4265  | 845.3999  |
| 9  | 102.0550 | 914.4730  | 897.4465  | 896.4625       | 942.4680  | 925.4414  | 924.4574       | 856.4676  |           | E    | 717.3526  | 716.3573  |          | 791.3894  | 774.3628  |
| 10 | 72.0808  | 1013.5415 | 996.5149  | 995.5309       | 1041.5364 | 1024.5098 | 1023.5258      | 999.5258  |           | V    | 618.2842  | 631.3046  |          | 662.3468  | 645.3202  |
| 11 | 44.0495  | 1084.5786 | 1067.5520 | 1066.5680      | 1112.5735 | 1095.5469 | 1094.5629      |           |           | A    | 547.2471  |           |          | 563.2784  | 546.2518  |
| 12 | 102.0550 | 1213.6212 | 1196.5946 | 1195.6106      | 1241.6161 | 1224.5895 | 1223.6055      | 1155.6157 |           | E    | 418.2045  | 417.2092  |          | 492.2413  | 475.2147  |
| 13 | 60.0444  | 1300.6532 | 1283.6266 | 1282.6426      | 1328.6481 | 1311.6216 | 1310.6375      | 1284.6583 |           | S    | 331.1724  | 330.1772  |          | 363.1987  | 346.1721  |
| 14 | 74.0600  | 1401.7009 | 1384.6743 | 1383.6903      | 1429.6958 | 1412.6692 | 1411.6852      | 1385.7060 | 1387.6852 | T    | 230.1248  | 243.1452  | 245.1244 | 276.1666  | 259.1401  |
| 15 | 129.1135 |           |           |                |           |           |                |           |           | R    | 74.0237   | 73.0284   |          | 175.1190  | 158.0924  |

| Seq   | ya       | yb       | Seq    | ya       | yb       | Seq     | ya       | yb       |
|-------|----------|----------|--------|----------|----------|---------|----------|----------|
| LA    | 157.1335 | 185.1285 | LAA    | 228.1707 | 256.1656 | LAAN    | 342.2136 | 370.2085 |
| LAANV | 441.2820 | 469.2769 | LAANVS | 528.3140 | 556.3089 | LAANVSA | 599.3511 | 627.3461 |
| AA    | 115.0866 | 143.0815 | AAN    | 229.1295 | 257.1244 | AANV    | 328.1979 | 356.1928 |
| AANVS | 415.2300 | 443.2249 | AANVSA | 486.2671 | 514.2620 | AANVSAE | 615.3097 | 643.3046 |
| AN    | 158.0924 | 186.0873 | ANV    | 257.1608 | 285.1557 | ANVS    | 344.1928 | 372.1878 |
| ANVSA | 415.2300 | 443.2249 | ANVSAE | 544.2726 | 572.2675 | ANVSAEV | 643.3410 | 671.3359 |

|       |          |          |        |          |          |         |          |          |
|-------|----------|----------|--------|----------|----------|---------|----------|----------|
| NV    | 186.1237 | 214.1186 | NVS    | 273.1557 | 301.1506 | NVSA    | 344.1928 | 372.1878 |
| NVSAE | 473.2354 | 501.2304 | NVSAEV | 572.3039 | 600.2988 | NVSAEVA | 643.3410 | 671.3359 |
| VS    | 159.1128 | 187.1077 | VSA    | 230.1499 | 258.1448 | VSAE    | 359.1925 | 387.1874 |
| VSAEV | 458.2609 | 486.2558 | VSAEVA | 529.2980 | 557.2930 | VSAEVAE | 658.3406 | 686.3355 |
| SA    | 131.0815 | 159.0764 | SAE    | 260.1241 | 288.1190 | SAEV    | 359.1925 | 387.1874 |
| SAEVA | 430.2296 | 458.2245 | SAEVAE | 559.2722 | 587.2671 | SAEVAES | 646.3042 | 674.2992 |
| AE    | 173.0921 | 201.0870 | AEV    | 272.1605 | 300.1554 | AEVA    | 343.1976 | 371.1925 |
| AEVAE | 472.2402 | 500.2351 | AEVAES | 559.2722 | 587.2671 | AEVAEST | 660.3199 | 688.3148 |
| EV    | 201.1234 | 229.1183 | EVA    | 272.1605 | 300.1554 | EVAE    | 401.2031 | 429.1980 |
| EVAES | 488.2351 | 516.2300 | EVAEST | 589.2828 | 617.2777 | VA      | 143.1179 | 171.1128 |
| VAE   | 272.1605 | 300.1554 | VAES   | 359.1925 | 387.1874 | VAEST   | 460.2402 | 488.2351 |
| AE    | 173.0921 | 201.0870 | AES    | 260.1241 | 288.1190 | AEST    | 361.1718 | 389.1667 |
| ES    | 189.0870 | 217.0819 | EST    | 290.1347 | 318.1296 | ST      | 161.0921 | 189.0870 |

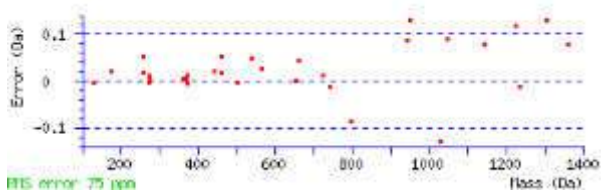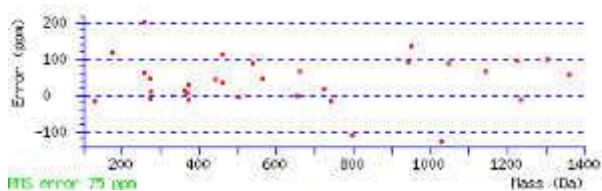

NCBI BLAST search of [WLAANVSAEVAESTR](#)

(Parameters: blastp, nr protein database, expect=20000, no filter, PAM30)

Other BLAST [web gateways](#)

#### All matches to this query

| Score | Mr(calc)  | Delta   | Sequence                         |
|-------|-----------|---------|----------------------------------|
| 58.0  | 1602.8002 | 0.0981  | <a href="#">WLAANVSAEVAESTR</a>  |
| 24.7  | 1602.8399 | 0.0583  | <a href="#">KSNILVSAEDMQLR</a>   |
| 20.6  | 1602.8213 | 0.0769  | <a href="#">TVVVGGDISNPTTSTR</a> |
| 20.6  | 1602.8994 | -0.0012 | <a href="#">VATPAAPRPGFPAVPR</a> |
| 20.4  | 1602.7962 | 0.1021  | <a href="#">ARADAATSPTTPTSTR</a> |
| 20.4  | 1602.7784 | 0.1199  | <a href="#">TRSPNDAAEMAALTR</a>  |
| 18.9  | 1602.8253 | 0.0729  | <a href="#">VVPYVTEPGAEVSTR</a>  |
| 18.3  | 1602.8626 | 0.0356  | <a href="#">MVLVPSWICLLTR</a>    |
| 17.8  | 1602.8114 | 0.0868  | <a href="#">AQYEVADSAIPARGR</a>  |
| 17.3  | 1602.7534 | 0.1448  | <a href="#">MSSAVDGMKYVPR</a>    |

Mascot: <http://www.matrixscience.com/>



**MATRIX SCIENCE Mascot Search Results**

**Peptide View Spot no 32**

**MS/MS Fragmentation of VATPDQAQEVHDGLR**

Found in **gi553107** in **NCBI nr**, triosephosphate isomerase, partial [Oryza sativa Japonica Group]

Match to Query 125: 1634.902224 from(1635.909500,1+) intensity(0.0000) index(26)

Title: Label: H19, Spot\_Id: 219969, Peak\_List\_Id: 229380, MSMS Job\_Run\_Id: 22019, Comment:

Data file C:\Documents and Settings\Administrator\Desktop\Farah-Garima 11May 2013\ppw\_H19\_136868348800.txt

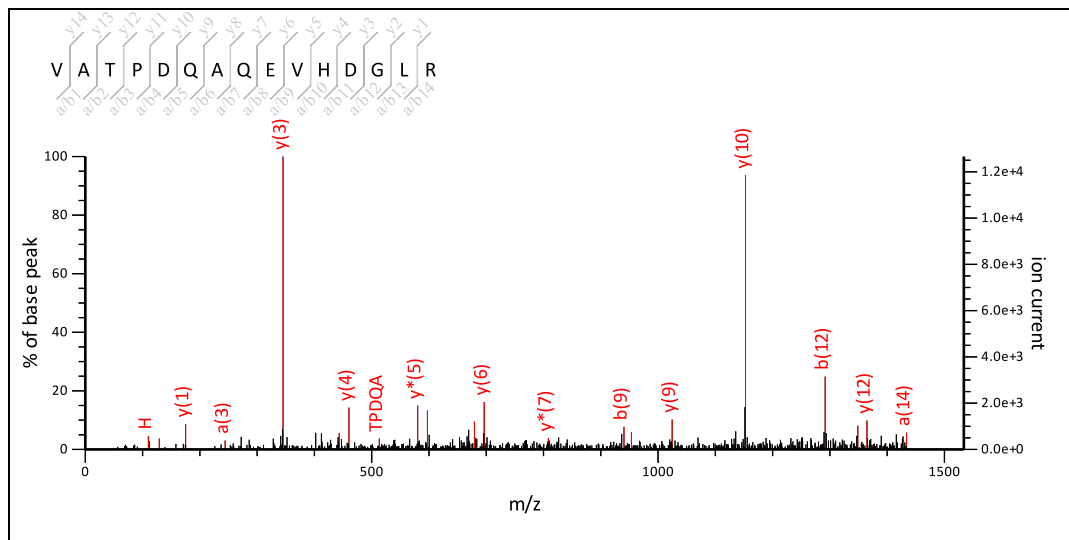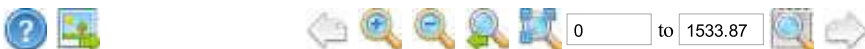

Label all possible matches  Label matches used for scoring

Monoisotopic mass of neutral peptide Mr(calc): 1634.8013

Fixed modifications: Carbamidomethyl (C) (apply to specified residues or termini only)

Ions Score: 71 Expect: 0.0022

Matches : 24/260 fragment ions using 28 most intense peaks [\(help\)](#)

| #  | Immon.          | a                | a*        | a <sup>0</sup> | b                | b*        | b <sup>0</sup> | d         | d'       | Seq. | v         | w         | w'        | y                | y*              |
|----|-----------------|------------------|-----------|----------------|------------------|-----------|----------------|-----------|----------|------|-----------|-----------|-----------|------------------|-----------------|
| 1  | 72.0808         | 72.0808          |           |                | 100.0757         |           |                | 44.0495   |          | V    |           |           |           |                  |                 |
| 2  | 44.0495         | 143.1179         |           |                | 171.1128         |           |                |           |          | A    | 1520.7088 |           |           | 1536.7401        | 1519.7136       |
| 3  | 74.0600         | <b>244.1656</b>  |           | 226.1550       | 272.1605         |           | 254.1499       | 228.1707  | 230.1499 | T    | 1419.6611 | 1432.6815 | 1434.6608 | 1465.7030        | 1448.6764       |
| 4  | 70.0651         | 341.2183         |           | 323.2078       | 369.2132         |           | 351.2027       | 315.2027  |          | P    | 1322.6084 | 1321.6131 |           | <b>1364.6553</b> | 1347.6288       |
| 5  | 88.0393         | 456.2453         |           | 438.2347       | 484.2402         |           | 466.2296       | 412.2554  |          | D    | 1207.5814 | 1206.5862 |           | 1267.6026        | 1250.5760       |
| 6  | 101.0709        | 584.3039         | 567.2773  | 566.2933       | 612.2988         | 595.2722  | 594.2882       | 527.2824  |          | Q    | 1079.5228 | 1078.5276 |           | <b>1152.5756</b> | 1135.5491       |
| 7  | 44.0495         | 655.3410         | 638.3144  | 637.3304       | 683.3359         | 666.3093  | 665.3253       |           |          | A    | 1008.4857 |           |           | <b>1024.5170</b> | 1007.4905       |
| 8  | 101.0709        | 783.3995         | 766.3730  | 765.3890       | 811.3945         | 794.3679  | 793.3839       | 726.3781  |          | Q    | 880.4272  | 879.4319  |           | <b>953.4799</b>  | 936.4534        |
| 9  | 102.0550        | 912.4421         | 895.4156  | 894.4316       | <b>940.4371</b>  | 923.4105  | 922.4265       | 854.4367  |          | E    | 751.3846  | 750.3893  |           | 825.4213         | <b>808.3948</b> |
| 10 | 72.0808         | 1011.5106        | 994.4840  | 993.5000       | 1039.5055        | 1022.4789 | 1021.4949      | 997.4949  |          | V    | 652.3161  | 665.3365  |           | <b>696.3787</b>  | <b>679.3522</b> |
| 11 | <b>110.0713</b> | 1148.5695        | 1131.5429 | 1130.5589      | 1176.5644        | 1159.5378 | 1158.5538      |           |          | H    | 515.2572  |           |           | <b>597.3103</b>  | <b>580.2838</b> |
| 12 | 88.0393         | 1263.5964        | 1246.5699 | 1245.5858      | <b>1291.5913</b> | 1274.5648 | 1273.5808      | 1219.6066 |          | D    | 400.2303  | 399.2350  |           | <b>460.2514</b>  | <b>443.2249</b> |
| 13 | 30.0338         | 1320.6179        | 1303.5913 | 1302.6073      | <b>1348.6128</b> | 1331.5862 | 1330.6022      |           |          | G    |           |           |           | <b>345.2245</b>  | 328.1979        |
| 14 | 86.0964         | <b>1433.7019</b> | 1416.6754 | 1415.6914      | 1461.6969        | 1444.6703 | 1443.6863      | 1391.6550 |          | L    | 230.1248  | 229.1295  |           | 288.2030         | 271.1765        |
| 15 | <b>129.1135</b> |                  |           |                |                  |           |                |           |          | R    | 74.0237   | 73.0284   |           | <b>175.1190</b>  | 158.0924        |

| Seq    | ya       | yb              | Seq    | ya       | yb              | Seq     | ya       | yb       |
|--------|----------|-----------------|--------|----------|-----------------|---------|----------|----------|
| AT     | 145.0972 | 173.0921        | ATP    | 242.1499 | 270.1448        | ATPD    | 357.1769 | 385.1718 |
| ATPDQ  | 485.2354 | <b>513.2304</b> | ATPDQA | 556.2726 | 584.2675        | ATPDQAQ | 684.3311 | 712.3260 |
| TP     | 171.1128 | 199.1077        | TPD    | 286.1397 | 314.1347        | TPDQ    | 414.1983 | 442.1932 |
| TPDQA  | 485.2354 | <b>513.2304</b> | TPDQAQ | 613.2940 | 641.2889        | PD      | 185.0921 | 213.0870 |
| PDQ    | 313.1506 | 341.1456        | PDQA   | 384.1878 | 412.1827        | PDQAQ   | 512.2463 | 540.2413 |
| PDQAQE | 641.2889 | 669.2838        | DQ     | 216.0979 | <b>244.0928</b> | DQA     | 287.1350 | 315.1299 |

|                        |          |                          |                        |          |          |                        |          |          |
|------------------------|----------|--------------------------|------------------------|----------|----------|------------------------|----------|----------|
| <a href="#">DQAQ</a>   | 415.1936 | <a href="#">443.1885</a> | <a href="#">DQAQE</a>  | 544.2362 | 572.2311 | <a href="#">DQAQEV</a> | 643.3046 | 671.2995 |
| <a href="#">QA</a>     | 172.1081 | 200.1030                 | <a href="#">QAQ</a>    | 300.1666 | 328.1615 | <a href="#">QAQE</a>   | 429.2092 | 457.2041 |
| <a href="#">QAQEV</a>  | 528.2776 | 556.2726                 | <a href="#">QAQEVH</a> | 665.3366 | 693.3315 | <a href="#">AQ</a>     | 172.1081 | 200.1030 |
| <a href="#">AQE</a>    | 301.1506 | 329.1456                 | <a href="#">AQEV</a>   | 400.2191 | 428.2140 | <a href="#">AQEVH</a>  | 537.2780 | 565.2729 |
| <a href="#">AQEVHD</a> | 652.3049 | 680.2998                 | <a href="#">QE</a>     | 230.1135 | 258.1084 | <a href="#">QEV</a>    | 329.1819 | 357.1769 |
| <a href="#">QEVH</a>   | 466.2409 | 494.2358                 | <a href="#">QEVHD</a>  | 581.2678 | 609.2627 | <a href="#">QEVHDG</a> | 638.2893 | 666.2842 |
| <a href="#">EV</a>     | 201.1234 | 229.1183                 | <a href="#">EVH</a>    | 338.1823 | 366.1772 | <a href="#">EVHD</a>   | 453.2092 | 481.2041 |
| <a href="#">EVHDG</a>  | 510.2307 | 538.2256                 | <a href="#">EVHDGL</a> | 623.3148 | 651.3097 | <a href="#">VH</a>     | 209.1397 | 237.1346 |
| <a href="#">VHD</a>    | 324.1666 | 352.1615                 | <a href="#">VHDG</a>   | 381.1881 | 409.1830 | <a href="#">VHDGL</a>  | 494.2722 | 522.2671 |
| <a href="#">HD</a>     | 225.0982 | 253.0931                 | <a href="#">HDG</a>    | 282.1197 | 310.1146 | <a href="#">HDGL</a>   | 395.2037 | 423.1987 |
| <a href="#">DG</a>     | 145.0608 | 173.0557                 | <a href="#">DGL</a>    | 258.1448 | 286.1397 | <a href="#">GL</a>     | 143.1179 | 171.1128 |

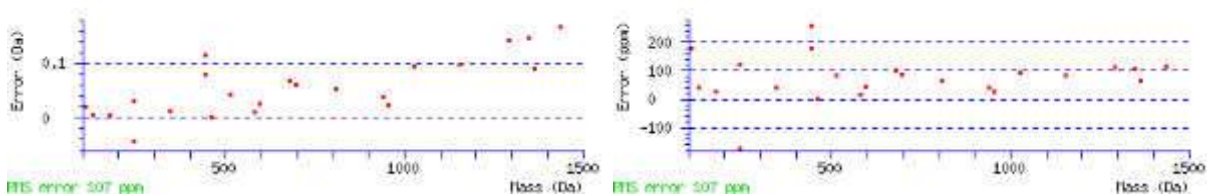

NCBI **BLAST** search of [VATPDQAQEVHDGLR](#)

(Parameters: blastp, nr protein database, expect=20000, no filter, PAM30)

Other BLAST [web gateways](#)

#### All matches to this query

| Score | Mr(calc)  | Delta   | Sequence                         |
|-------|-----------|---------|----------------------------------|
| 71.2  | 1634.8013 | 0.1010  | <a href="#">VATPDQAQEVHDGLR</a>  |
| 27.3  | 1634.8601 | 0.0421  | <a href="#">QLNQOGLTRHDLGR</a>   |
| 26.5  | 1634.8264 | 0.0758  | <a href="#">RDIVDDLTYEAGR</a>    |
| 26.3  | 1634.8740 | 0.0282  | <a href="#">RDIVDHVIDDLVAR</a>   |
| 26.3  | 1634.8814 | 0.0208  | <a href="#">DRLVVEMLYATGIR</a>   |
| 26.1  | 1634.8297 | 0.0725  | <a href="#">IASLVISKDENGMSR</a>  |
| 25.6  | 1634.9832 | -0.0810 | <a href="#">RDVAIVGTGVVLAPIR</a> |
| 25.5  | 1634.9104 | -0.0082 | <a href="#">AVSSPDLRPSALIGPR</a> |
| 25.5  | 1634.8125 | 0.0897  | <a href="#">RDTGFDSTATVGRPR</a>  |
| 25.4  | 1634.9355 | -0.0333 | <a href="#">ISAPPKDNLILEGIR</a>  |

Mascot: <http://www.matrixscience.com/>

**MATRIX SCIENCE Mascot Search Results**

**Peptide View Spot no 32**

MS/MS Fragmentation of **VATPDQAQEVHDGLRK**

Found in **gi553107** in **NCBI nr**, triosephosphate isomerase, partial [Oryza sativa Japonica Group]

Match to Query 137: 1763.004524 from(1764.011800,1+) intensity(0.0000) index(29)

Title: Label: H19, Spot\_Id: 219969, Peak\_List\_Id: 229373, MSMS Job\_Run\_Id: 22019, Comment:

Data file C:\Documents and Settings\Administrator\Desktop\Farah-Garima 11May 2013\ppw\_H19\_136868348800.txt

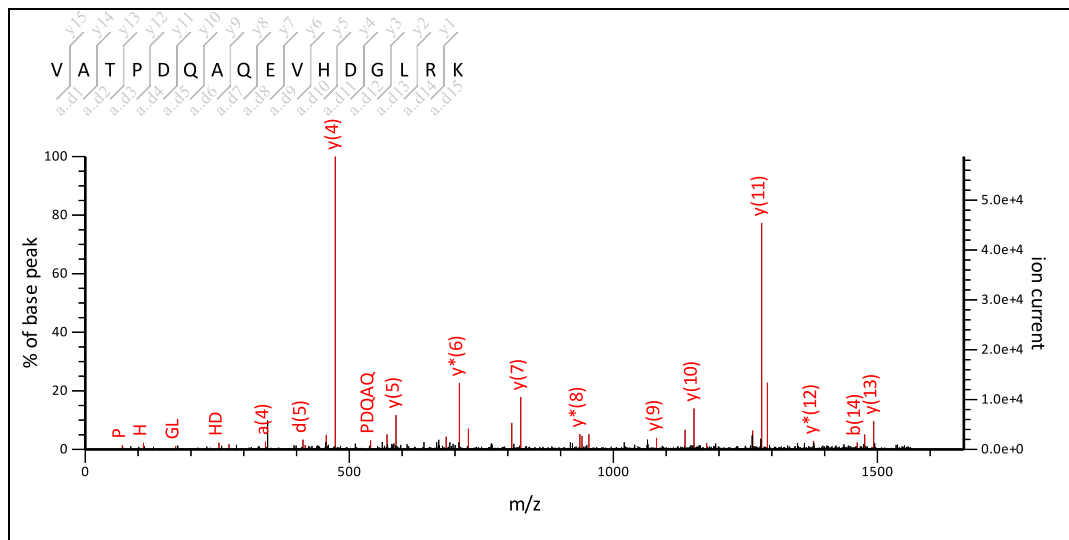

Navigation icons: Home, Back, Forward, Search, Print, etc. Range: 0 to 1663.64

Label all possible matches  Label matches used for scoring

Monoisotopic mass of neutral peptide Mr(calc): 1762.8962

Fixed modifications: Carbamidomethyl (C) (apply to specified residues or termini only)

Ions Score: 69 Expect: 0.0029

Matches : 37/282 fragment ions using 48 most intense peaks (help)

| #  | Immon.   | a         | a*        | a <sup>0</sup> | b         | b*        | b <sup>0</sup> | d         | d'       | Seq. | v         | w         | w'        | y         | y*        |
|----|----------|-----------|-----------|----------------|-----------|-----------|----------------|-----------|----------|------|-----------|-----------|-----------|-----------|-----------|
| 1  | 72.0808  | 72.0808   |           |                | 100.0757  |           |                | 44.0495   |          | V    |           |           |           |           |           |
| 2  | 44.0495  | 143.1179  |           |                | 171.1128  |           |                |           |          | A    | 1648.8038 |           |           | 1664.8351 | 1647.8085 |
| 3  | 74.0600  | 244.1656  |           | 226.1550       | 272.1605  |           | 254.1499       | 228.1707  | 230.1499 | T    | 1547.7561 | 1560.7765 | 1562.7558 | 1593.7980 | 1576.7714 |
| 4  | 70.0651  | 341.2183  |           | 323.2078       | 369.2132  |           | 351.2027       | 315.2027  |          | P    | 1450.7033 | 1449.7081 |           | 1492.7503 | 1475.7237 |
| 5  | 88.0393  | 456.2453  |           | 438.2347       | 484.2402  |           | 466.2296       | 412.2554  |          | D    | 1335.6764 | 1334.6811 |           | 1395.6975 | 1378.6710 |
| 6  | 101.0709 | 584.3039  | 567.2773  | 566.2933       | 612.2988  | 595.2722  | 594.2882       | 527.2824  |          | Q    | 1207.6178 | 1206.6226 |           | 1280.6706 | 1263.6440 |
| 7  | 44.0495  | 655.3410  | 638.3144  | 637.3304       | 683.3359  | 666.3093  | 665.3253       |           |          | A    | 1136.5807 |           |           | 1152.6120 | 1135.5854 |
| 8  | 101.0709 | 783.3995  | 766.3730  | 765.3890       | 811.3945  | 794.3679  | 793.3839       | 726.3781  |          | Q    | 1008.5221 | 1007.5269 |           | 1081.5749 | 1064.5483 |
| 9  | 102.0550 | 912.4421  | 895.4156  | 894.4316       | 940.4371  | 923.4105  | 922.4265       | 854.4367  |          | E    | 879.4795  | 878.4843  |           | 953.5163  | 936.4898  |
| 10 | 72.0808  | 1011.5106 | 994.4840  | 993.5000       | 1039.5055 | 1022.4789 | 1021.4949      | 997.4949  |          | V    | 780.4111  | 793.4315  |           | 824.4737  | 807.4472  |
| 11 | 110.0713 | 1148.5695 | 1131.5429 | 1130.5589      | 1176.5644 | 1159.5378 | 1158.5538      |           |          | H    | 643.3522  |           |           | 725.4053  | 708.3787  |
| 12 | 88.0393  | 1263.5964 | 1246.5699 | 1245.5858      | 1291.5913 | 1274.5648 | 1273.5808      | 1219.6066 |          | D    | 528.3253  | 527.3300  |           | 588.3464  | 571.3198  |
| 13 | 30.0338  | 1320.6179 | 1303.5913 | 1302.6073      | 1348.6128 | 1331.5862 | 1330.6022      |           |          | G    |           |           |           | 473.3194  | 456.2929  |
| 14 | 86.0964  | 1433.7019 | 1416.6754 | 1415.6914      | 1461.6969 | 1444.6703 | 1443.6863      | 1391.6550 |          | L    | 358.2197  | 357.2245  |           | 416.2980  | 399.2714  |
| 15 | 129.1135 | 1589.8030 | 1572.7765 | 1571.7925      | 1617.7980 | 1600.7714 | 1599.7874      | 1504.7390 |          | R    | 202.1186  | 201.1234  |           | 303.2139  | 286.1874  |
| 16 | 101.1073 |           |           |                |           |           |                |           |          | K    | 74.0237   | 73.0284   |           | 147.1128  | 130.0863  |

| Seq   | ya       | yb       | Seq    | ya       | yb       | Seq     | ya       | yb       |
|-------|----------|----------|--------|----------|----------|---------|----------|----------|
| AT    | 145.0972 | 173.0921 | ATP    | 242.1499 | 270.1448 | ATPD    | 357.1769 | 385.1718 |
| ATPDQ | 485.2354 | 513.2304 | ATPDQA | 556.2726 | 584.2675 | ATPDQAQ | 684.3311 | 712.3260 |
| TP    | 171.1128 | 199.1077 | TPD    | 286.1397 | 314.1347 | TPDQ    | 414.1983 | 442.1932 |
| TPDQA | 485.2354 | 513.2304 | TPDQAQ | 613.2940 | 641.2889 | PD      | 185.0921 | 213.0870 |
| PDQ   | 313.1506 | 341.1456 | PDQA   | 384.1878 | 412.1827 | PDQAQ   | 512.2463 | 540.2413 |

|                        |          |          |                        |          |                 |                        |          |                 |
|------------------------|----------|----------|------------------------|----------|-----------------|------------------------|----------|-----------------|
| <a href="#">PDQAE</a>  | 641.2889 | 669.2838 | <a href="#">DQ</a>     | 216.0979 | 244.0928        | <a href="#">DQA</a>    | 287.1350 | 315.1299        |
| <a href="#">DQAQ</a>   | 415.1936 | 443.1885 | <a href="#">DQAE</a>   | 544.2362 | 572.2311        | <a href="#">DQAEV</a>  | 643.3046 | 671.2995        |
| <a href="#">QA</a>     | 172.1081 | 200.1030 | <a href="#">QAQ</a>    | 300.1666 | 328.1615        | <a href="#">QAQE</a>   | 429.2092 | 457.2041        |
| <a href="#">QAQEV</a>  | 528.2776 | 556.2726 | <a href="#">QAQEVH</a> | 665.3366 | 693.3315        | <a href="#">AQ</a>     | 172.1081 | 200.1030        |
| <a href="#">AQE</a>    | 301.1506 | 329.1456 | <a href="#">AQEV</a>   | 400.2191 | 428.2140        | <a href="#">AQEVH</a>  | 537.2780 | 565.2729        |
| <a href="#">AQEVHD</a> | 652.3049 | 680.2998 | <a href="#">QE</a>     | 230.1135 | 258.1084        | <a href="#">QEV</a>    | 329.1819 | 357.1769        |
| <a href="#">QEVH</a>   | 466.2409 | 494.2358 | <a href="#">QEVHD</a>  | 581.2678 | 609.2627        | <a href="#">QEVHDG</a> | 638.2893 | 666.2842        |
| <a href="#">EV</a>     | 201.1234 | 229.1183 | <a href="#">EVH</a>    | 338.1823 | 366.1772        | <a href="#">EVHD</a>   | 453.2092 | 481.2041        |
| <a href="#">EVHDG</a>  | 510.2307 | 538.2256 | <a href="#">EVHDGL</a> | 623.3148 | 651.3097        | <a href="#">VH</a>     | 209.1397 | 237.1346        |
| <a href="#">VHD</a>    | 324.1666 | 352.1615 | <a href="#">VHDG</a>   | 381.1881 | 409.1830        | <a href="#">VHDGL</a>  | 494.2722 | 522.2671        |
| <a href="#">VHDGLR</a> | 650.3733 | 678.3682 | <a href="#">HD</a>     | 225.0982 | <b>253.0931</b> | <a href="#">HDG</a>    | 282.1197 | 310.1146        |
| <a href="#">HDGL</a>   | 395.2037 | 423.1987 | <a href="#">HDGLR</a>  | 551.3049 | 579.2998        | <a href="#">DG</a>     | 145.0608 | 173.0557        |
| <a href="#">DGL</a>    | 258.1448 | 286.1397 | <a href="#">DGLR</a>   | 414.2459 | 442.2409        | <a href="#">GL</a>     | 143.1179 | <b>171.1128</b> |
| <a href="#">GLR</a>    | 299.2190 | 327.2139 | <a href="#">LR</a>     | 242.1975 | 270.1925        |                        |          |                 |

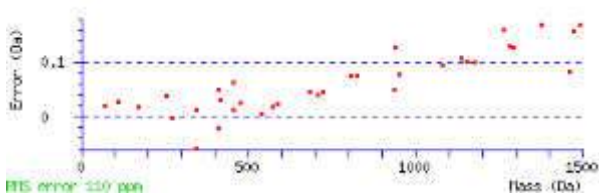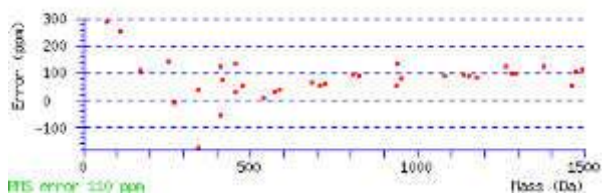

NCBI BLAST search of [VATPDQAEVHDGLRK](#)

(Parameters: blastp, nr protein database, expect=20000, no filter, PAM30)

Other BLAST [web gateways](#)

#### All matches to this query

| Score | Mr(calc)  | Delta   | Sequence                           |
|-------|-----------|---------|------------------------------------|
| 69.1  | 1762.8962 | 0.1083  | <a href="#">VATPDQAEVHDGLRK</a>    |
| 32.3  | 1762.9074 | 0.0971  | <a href="#">RPTEAQOEDRPAIPR</a>    |
| 30.7  | 1762.9400 | 0.0645  | <a href="#">LVCLNQLPPGDLAPR</a>    |
| 29.0  | 1762.9479 | 0.0567  | <a href="#">KAAGIEHVTNPGSVTHK</a>  |
| 27.6  | 1762.9829 | 0.0217  | <a href="#">LIEQPVEAPNLDGLKK</a>   |
| 26.3  | 1763.0417 | -0.0372 | <a href="#">VGDRAVLQLDKPALR</a>    |
| 26.1  | 1762.8594 | 0.1451  | <a href="#">IVYTDIQMPGSMGLR</a>    |
| 25.8  | 1762.9326 | 0.0719  | <a href="#">ERVAAVGAGLDLPPDQR</a>  |
| 25.6  | 1762.9942 | 0.0104  | <a href="#">AVTQTVDGAPVIIVAGPR</a> |
| 24.7  | 1762.8850 | 0.1195  | <a href="#">YSVSQTYTDNVNLAIR</a>   |

Mascot: <http://www.matrixscience.com/>


**Mascot Search Results**
**Peptide View** Spot no 32
MS/MS Fragmentation of **SQLRPEIQVAAQNCWVK**Found in **gi553107** in **NCBInr**, triosephosphate isomerase, partial [Oryza sativa Japonica Group]

Match to Query 151: 2026.161324 from(2027.168600,1+) intensity(0.0000) index(33)

Title: Label: H19, Spot\_Id: 219969, Peak\_List\_Id: 229378, MSMS Job\_Run\_Id: 22019, Comment:

Data file C:\Documents and Settings\Administrator\Desktop\Farah-Garima 11May 2013\ppw\_H19\_136868348800.txt

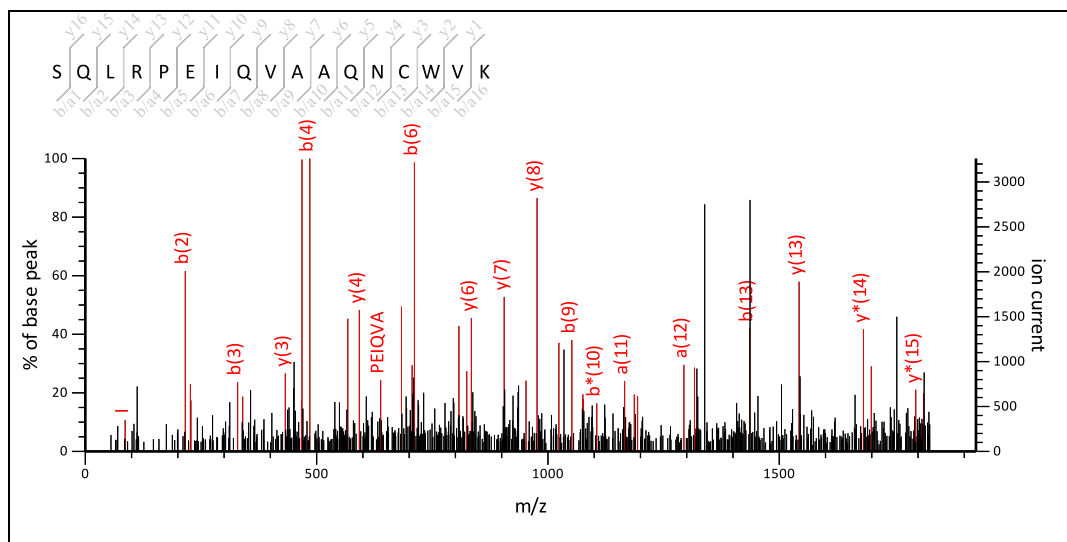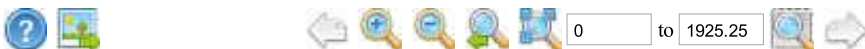Label all possible matches  Label matches used for scoring 

Monoisotopic mass of neutral peptide Mr(calc): 2026.0418

Fixed modifications: Carbamidomethyl (C) (apply to specified residues or termini only)

Ions Score: 76 Expect: 0.00055

Matches : 45/305 fragment ions using 54 most intense peaks ([help](#))

| #  | Immon.         | a                | a*        | a <sup>0</sup>   | b                | b*               | b <sup>0</sup>  | d         | d'       | Seq. | v         | w         | w'        | y                | y*               |
|----|----------------|------------------|-----------|------------------|------------------|------------------|-----------------|-----------|----------|------|-----------|-----------|-----------|------------------|------------------|
| 1  | 60.0444        | 60.0444          |           | 42.0338          | 88.0393          |                  | 70.0287         | 44.0495   |          | S    |           |           |           |                  |                  |
| 2  | 101.0709       | 188.1030         | 171.0764  | 170.0924         | <b>216.0979</b>  | 199.0713         | 198.0873        | 131.0815  |          | Q    | 1866.9643 | 1865.9691 |           | 1940.0171        | 1922.9905        |
| 3  | <b>86.0964</b> | 301.1870         | 284.1605  | 283.1765         | <b>329.1819</b>  | <b>312.1554</b>  | 311.1714        | 259.1401  |          | L    | 1753.8803 | 1752.8850 |           | <b>1811.9585</b> | <b>1794.9320</b> |
| 4  | 129.1135       | 457.2881         | 440.2616  | 439.2776         | <b>485.2831</b>  | <b>468.2565</b>  | <b>467.2725</b> | 372.2241  |          | R    | 1597.7791 | 1596.7839 |           | <b>1698.8744</b> | <b>1681.8479</b> |
| 5  | 70.0651        | 554.3409         | 537.3144  | 536.3303         | 582.3358         | 565.3093         | 564.3253        | 528.3253  |          | P    | 1500.7264 | 1499.7311 |           | <b>1542.7733</b> | 1525.7468        |
| 6  | 102.0550       | <b>683.3835</b>  | 666.3569  | 665.3729         | <b>711.3784</b>  | 694.3519         | 693.3678        | 625.3780  |          | E    | 1371.6838 | 1370.6885 |           | 1445.7206        | 1428.6940        |
| 7  | <b>86.0964</b> | 796.4676         | 779.4410  | 778.4570         | <b>824.4625</b>  | <b>807.4359</b>  | 806.4519        | 768.4363  | 782.4519 | I    | 1258.5997 | 1271.6201 | 1285.6358 | <b>1316.6780</b> | 1299.6514        |
| 8  | 101.0709       | 924.5261         | 907.4996  | 906.5156         | <b>952.5211</b>  | 935.4945         | 934.5105        | 867.5047  |          | Q    | 1130.5411 | 1129.5459 |           | 1203.5939        | <b>1186.5674</b> |
| 9  | 72.0808        | <b>1023.5946</b> | 1006.5680 | 1005.5840        | <b>1051.5895</b> | 1034.5629        | 1033.5789       | 1009.5789 |          | V    | 1031.4727 | 1044.4931 |           | <b>1075.5353</b> | 1058.5088        |
| 10 | 44.0495        | 1094.6317        | 1077.6051 | <b>1076.6211</b> | 1122.6266        | <b>1105.6000</b> | 1104.6160       |           |          | A    | 960.4356  |           |           | <b>976.4669</b>  | 959.4404         |
| 11 | 44.0495        | <b>1165.6688</b> | 1148.6422 | 1147.6582        | <b>1193.6637</b> | 1176.6371        | 1175.6531       |           |          | A    | 889.3985  |           |           | <b>905.4298</b>  | 888.4033         |
| 12 | 101.0709       | <b>1293.7274</b> | 1276.7008 | 1275.7168        | 1321.7223        | 1304.6957        | 1303.7117       | 1236.7059 |          | Q    | 761.3399  | 760.3447  |           | <b>834.3927</b>  | 817.3661         |
| 13 | 87.0553        | 1407.7703        | 1390.7437 | 1389.7597        | <b>1435.7652</b> | 1418.7387        | 1417.7546       | 1364.7645 |          | N    | 647.2970  | 646.3017  |           | <b>706.3341</b>  | 689.3076         |
| 14 | 133.0430       | 1567.8009        | 1550.7744 | 1549.7904        | 1595.7959        | 1578.7693        | 1577.7853       | 1478.8074 |          | C    | 487.2663  | 486.2711  |           | <b>592.2912</b>  | 575.2646         |
| 15 | 159.0917       | 1753.8803        | 1736.8537 | 1735.8697        | 1781.8752        | 1764.8486        | 1763.8646       |           |          | W    | 301.1870  |           |           | <b>432.2605</b>  | 415.2340         |
| 16 | 72.0808        | 1852.9487        | 1835.9221 | 1834.9381        | 1880.9436        | 1863.9170        | 1862.9330       | 1838.9330 |          | V    | 202.1186  | 215.1390  |           | 246.1812         | 229.1547         |
| 17 | 101.1073       |                  |           |                  |                  |                  |                 |           |          | K    | 74.0237   | 73.0284   |           | 147.1128         | 130.0863         |

| Seq   | ya              | yb       | Seq   | ya              | yb       | Seq   | ya              | yb       |
|-------|-----------------|----------|-------|-----------------|----------|-------|-----------------|----------|
| QL    | 214.1550        | 242.1499 | QLR   | 370.2561        | 398.2510 | QLRP  | <b>467.3089</b> | 495.3038 |
| QLRPE | 596.3515        | 624.3464 | LR    | 242.1975        | 270.1925 | LRP   | 339.2503        | 367.2452 |
| LRPE  | <b>468.2929</b> | 496.2878 | LRPEI | 581.3770        | 609.3719 | RP    | 226.1662        | 254.1612 |
| RPE   | 355.2088        | 383.2037 | RPEI  | <b>468.2929</b> | 496.2878 | RPEIQ | 596.3515        | 624.3464 |

|                         |          |                          |                        |          |                          |                         |                          |                          |
|-------------------------|----------|--------------------------|------------------------|----------|--------------------------|-------------------------|--------------------------|--------------------------|
| <a href="#">RPEIQV</a>  | 695.4199 | 723.4148                 | <a href="#">PE</a>     | 199.1077 | <a href="#">227.1026</a> | <a href="#">PEI</a>     | <a href="#">312.1918</a> | <a href="#">340.1867</a> |
| <a href="#">PEIQ</a>    | 440.2504 | <a href="#">468.2453</a> | <a href="#">PEIQV</a>  | 539.3188 | <a href="#">567.3137</a> | <a href="#">PEIQVA</a>  | 610.3559                 | <a href="#">638.3508</a> |
| <a href="#">PEIQVAA</a> | 681.3930 | 709.3879                 | <a href="#">EI</a>     | 215.1390 | 243.1339                 | <a href="#">EIQ</a>     | 343.1976                 | 371.1925                 |
| <a href="#">EIQV</a>    | 442.2660 | 470.2609                 | <a href="#">EIQVA</a>  | 513.3031 | 541.2980                 | <a href="#">EIQVAA</a>  | 584.3402                 | 612.3352                 |
| <a href="#">IQ</a>      | 214.1550 | 242.1499                 | <a href="#">IQV</a>    | 313.2234 | 341.2183                 | <a href="#">IQVA</a>    | 384.2605                 | 412.2554                 |
| <a href="#">IQVAA</a>   | 455.2976 | 483.2926                 | <a href="#">IQVAAQ</a> | 583.3562 | 611.3511                 | <a href="#">IQVAAQN</a> | 697.3992                 | 725.3941                 |
| <a href="#">QV</a>      | 200.1394 | <a href="#">228.1343</a> | <a href="#">QVA</a>    | 271.1765 | 299.1714                 | <a href="#">QVAA</a>    | 342.2136                 | 370.2085                 |
| <a href="#">QVAAQ</a>   | 470.2722 | 498.2671                 | <a href="#">QVAAQN</a> | 584.3151 | 612.3100                 | <a href="#">VA</a>      | 143.1179                 | 171.1128                 |
| <a href="#">VAA</a>     | 214.1550 | 242.1499                 | <a href="#">VAAQ</a>   | 342.2136 | 370.2085                 | <a href="#">VAAQN</a>   | 456.2565                 | 484.2514                 |
| <a href="#">VAAQNC</a>  | 616.2872 | 644.2821                 | <a href="#">AA</a>     | 115.0866 | 143.0815                 | <a href="#">AAQ</a>     | 243.1452                 | 271.1401                 |
| <a href="#">AAQN</a>    | 357.1881 | 385.1830                 | <a href="#">AAQNC</a>  | 517.2187 | 545.2137                 | <a href="#">AQ</a>      | 172.1081                 | 200.1030                 |
| <a href="#">AQN</a>     | 286.1510 | 314.1459                 | <a href="#">AQNC</a>   | 446.1816 | 474.1765                 | <a href="#">AQNCW</a>   | 632.2609                 | 660.2559                 |
| <a href="#">QN</a>      | 215.1139 | 243.1088                 | <a href="#">QNC</a>    | 375.1445 | 403.1394                 | <a href="#">QNCW</a>    | 561.2238                 | 589.2187                 |
| <a href="#">QNCWV</a>   | 660.2922 | 688.2872                 | <a href="#">NC</a>     | 247.0859 | 275.0809                 | <a href="#">NCW</a>     | 433.1652                 | 461.1602                 |
| <a href="#">NCWV</a>    | 532.2337 | 560.2286                 | <a href="#">CW</a>     | 319.1223 | 347.1172                 | <a href="#">CWV</a>     | 418.1907                 | 446.1857                 |
| <a href="#">WV</a>      | 258.1601 | 286.1550                 |                        |          |                          |                         |                          |                          |

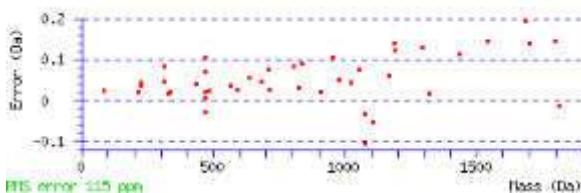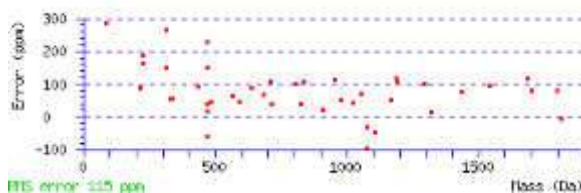

NCBI BLAST search of [SOLRPEIQVAAQNCWVK](#)

(Parameters: blastp, nr protein database, expect=20000, no filter, PAM30)

Other BLAST [web gateways](#)

#### All matches to this query

| Score | Mr(calc)  | Delta  | Sequence                              |
|-------|-----------|--------|---------------------------------------|
| 75.5  | 2026.0418 | 0.1195 | <a href="#">SOLRPEIQVAAQNCWVK</a>     |
| 20.3  | 2026.1324 | 0.0289 | <a href="#">DVPAGAVTLGVAHVPAIGGVR</a> |
| 18.0  | 2026.1323 | 0.0290 | <a href="#">LGSAADIRPIGAAATLVFOR</a>  |
| 16.3  | 2026.0636 | 0.0977 | <a href="#">LRPTAVVSQYSNIFEFR</a>     |
| 14.5  | 2026.0517 | 0.1096 | <a href="#">VAEVLPLDLVAAIENRMR</a>    |
| 14.2  | 2026.0259 | 0.1355 | <a href="#">FAGTTLLETVAEEAEEASK</a>   |
| 13.4  | 2025.9868 | 0.1746 | <a href="#">QSYAEAIAAAEEDLPRHR</a>    |
| 13.0  | 2026.1171 | 0.0442 | <a href="#">LRPOLVSLGSAALTSOETR</a>   |
| 13.0  | 2026.1184 | 0.0429 | <a href="#">LROLAENLLLNATHHGAR</a>    |
| 12.8  | 2026.1575 | 0.0038 | <a href="#">LILQVAVGSAASSGVFLAAPR</a> |

Mascot: <http://www.matrixscience.com/>



# MATRIX SCIENCE Mascot Search Results

## Peptide View **Spot no 34**

MS/MS Fragmentation of **IFLPEGLLDR**

Found in **gi|108864186** in **NCBI nr**, Chlorophyll A-B binding protein, expressed [Oryza sativa Japonica Group]

Match to Query 115: 1171.705624 from(1172.712900,1+) intensity(0.0000) index(6)

Title: Label: F7, Spot\_Id: 219775, Peak\_List\_Id: 226288, MSMS Job\_Run\_Id: 21839, Comment:

Data file C:\Documents and Settings\Administrator\Desktop\Farah-Garima 11May 2013\ppw\_F7\_136859913100.txt

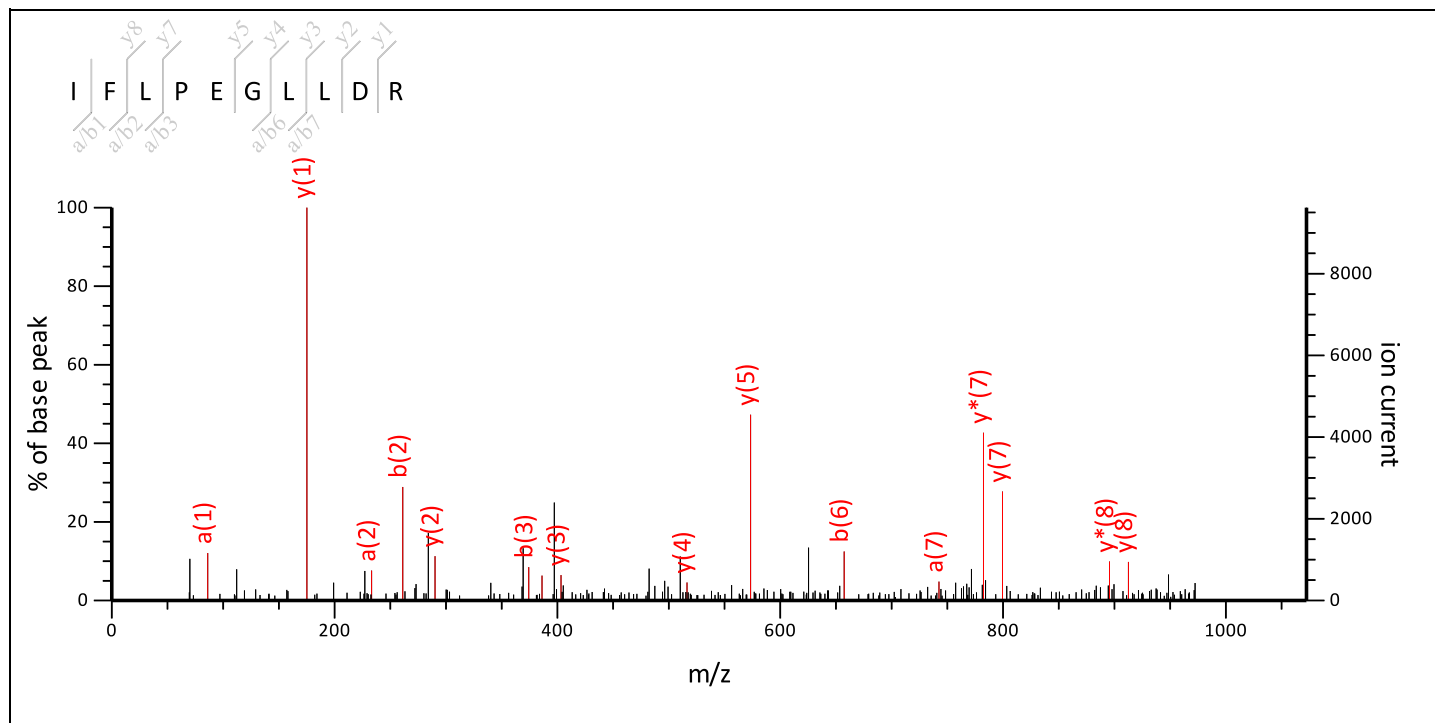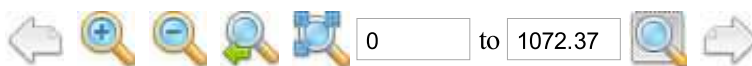

Label all possible matches  Label matches used for scoring

**Monoisotopic mass of neutral peptide Mr(calc):** 1171.6601

**Fixed modifications:** Carbamidomethyl (C) (apply to specified residues or termini only)

**Ions Score:** 35 **Expect:** 9.1

**Matches :** 16/36 fragment ions using 38 most intense peaks ([help](#))

| # | a        | b        | Seq. | y         | y*        | #  |
|---|----------|----------|------|-----------|-----------|----|
| 1 | 86.0964  | 114.0913 | I    |           |           | 10 |
| 2 | 233.1648 | 261.1598 | F    | 1059.5833 | 1042.5568 | 9  |
| 3 | 346.2489 | 374.2438 | L    | 912.5149  | 895.4884  | 8  |
| 4 | 443.3017 | 471.2966 | P    | 799.4308  | 782.4043  | 7  |
| 5 | 572.3443 | 600.3392 | E    | 702.3781  | 685.3515  | 6  |
| 6 | 629.3657 | 657.3606 | G    | 573.3355  | 556.3089  | 5  |
| 7 | 742.4498 | 770.4447 | L    | 516.3140  | 499.2875  | 4  |
| 8 | 855.5339 | 883.5288 | L    | 403.2300  | 386.2034  | 3  |



|    |          |          |   |          |          |   |
|----|----------|----------|---|----------|----------|---|
| 9  | 970.5608 | 998.5557 | D | 290.1459 | 273.1193 | 2 |
| 10 |          |          | R | 175.1190 | 158.0924 | 1 |

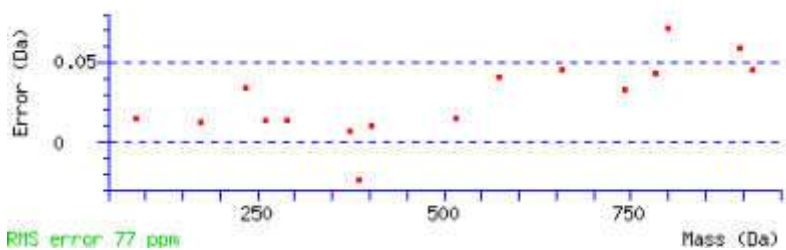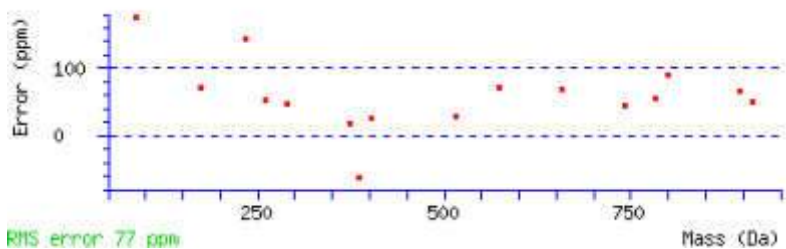

NCBI **BLAST** search of [IFLPEGLLDR](#)

(Parameters: blastp, nr protein database, expect=20000, no filter, PAM30)

Other BLAST [web gateways](#)

#### All matches to this query

| Score | Mr(calc)  | Delta   | Sequence                     |
|-------|-----------|---------|------------------------------|
| 34.9  | 1171.6601 | 0.0455  | <a href="#">IFLPEGLLDR</a>   |
| 23.5  | 1171.6866 | 0.0190  | <a href="#">IFIFGILGHR</a>   |
| 23.4  | 1171.7077 | -0.0021 | <a href="#">FLLGAAALGLAR</a> |
| 23.3  | 1171.6965 | 0.0091  | <a href="#">FLLPVSLIDR</a>   |
| 23.3  | 1171.6998 | 0.0058  | <a href="#">MIILGILDR</a>    |
| 22.4  | 1171.6561 | 0.0496  | <a href="#">LVAILGTNSER</a>  |
| 22.2  | 1171.7441 | -0.0385 | <a href="#">LFLLIAGAAKR</a>  |
| 21.7  | 1171.6998 | 0.0058  | <a href="#">LMDLLLIVAR</a>   |
| 21.3  | 1171.6495 | 0.0561  | <a href="#">IMIGRSLNPR</a>   |
| 21.1  | 1171.6635 | 0.0422  | <a href="#">VPSLLSMALNK</a>  |

Mascot: <http://www.matrixscience.com/>

# MATRIX SCIENCE Mascot Search Results

## Peptide View Spot no 34

MS/MS Fragmentation of **YQAYELIHAR**

Found in **gi|108864186** in **NCBIInr**, Chlorophyll A-B binding protein, expressed [Oryza sativa Japonica Group]

Match to Query 137: 1262.691324 from(1263.698600,1+) intensity(0.0000) index(8)

Title: Label: F7, Spot\_Id: 219775, Peak\_List\_Id: 226283, MSMS Job\_Run\_Id: 21839, Comment:

Data file C:\Documents and Settings\Administrator\Desktop\Farah-Garima 11May 2013\ppw\_F7\_136859913100.txt

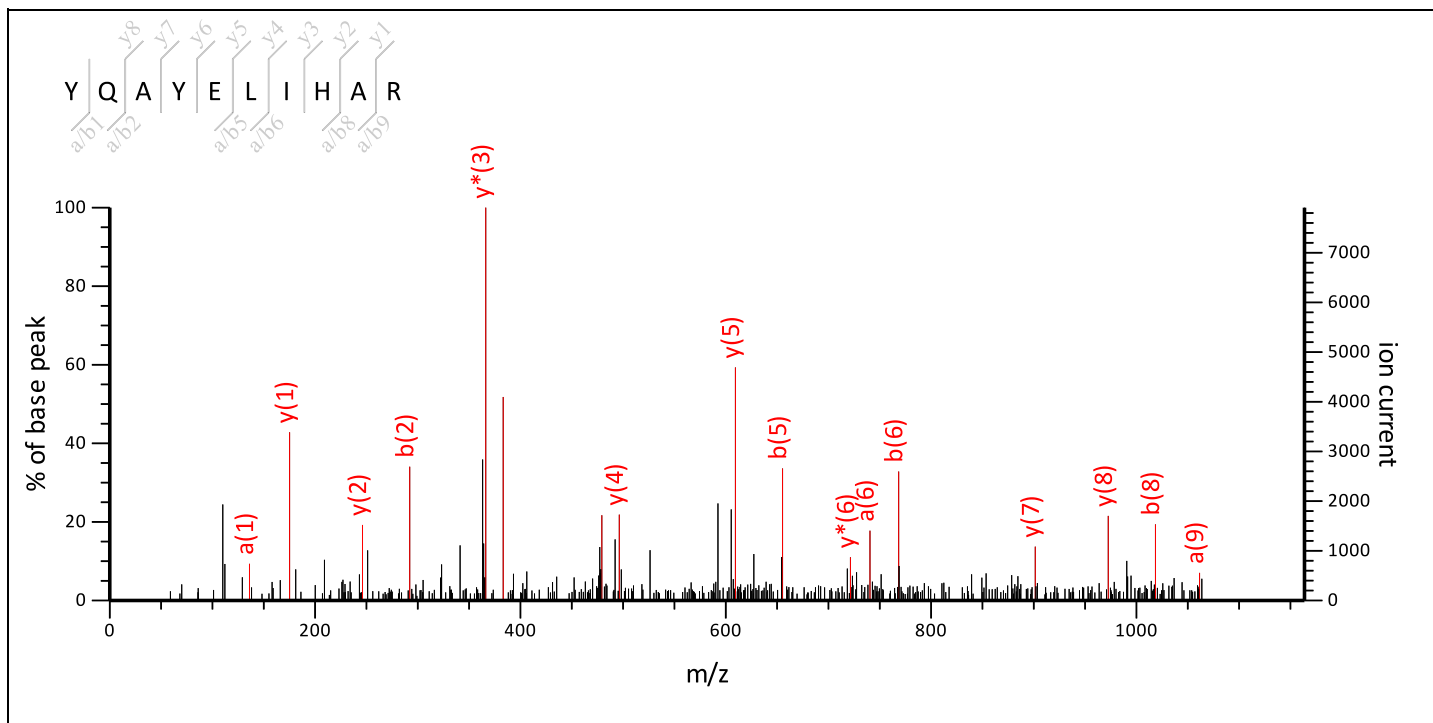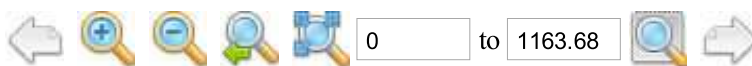

Label all possible matches  Label matches used for scoring

**Monoisotopic mass of neutral peptide Mr(calc):** 1262.6407

**Fixed modifications:** Carbamidomethyl (C) (apply to specified residues or termini only)

**Ions Score:** 56 **Expect:** 0.1

**Matches :** 17/52 fragment ions using 22 most intense peaks ([help](#))

| # | a        | a*       | b         | b*        | Seq. | y         | y*        | #  |
|---|----------|----------|-----------|-----------|------|-----------|-----------|----|
| 1 | 136.0757 |          | 164.0706  |           | Y    |           |           | 10 |
| 2 | 264.1343 | 247.1077 | 292.1292  | 275.1026  | Q    | 1100.5847 | 1083.5582 | 9  |
| 3 | 335.1714 | 318.1448 | 363.1663  | 346.1397  | A    | 972.5261  | 955.4996  | 8  |
| 4 | 498.2347 | 481.2082 | 526.2296  | 509.2031  | Y    | 901.4890  | 884.4625  | 7  |
| 5 | 627.2773 | 610.2508 | 655.2722  | 638.2457  | E    | 738.4257  | 721.3992  | 6  |
| 6 | 740.3614 | 723.3348 | 768.3563  | 751.3297  | L    | 609.3831  | 592.3566  | 5  |
| 7 | 853.4454 | 836.4189 | 881.4403  | 864.4138  | I    | 496.2990  | 479.2725  | 4  |
| 8 | 990.5043 | 973.4778 | 1018.4993 | 1001.4727 | H    | 383.2150  | 366.1884  | 3  |

|    |           |           |           |           |   |          |          |   |
|----|-----------|-----------|-----------|-----------|---|----------|----------|---|
| 9  | 1061.5415 | 1044.5149 | 1089.5364 | 1072.5098 | A | 246.1561 | 229.1295 | 2 |
| 10 |           |           |           |           | R | 175.1190 | 158.0924 | 1 |

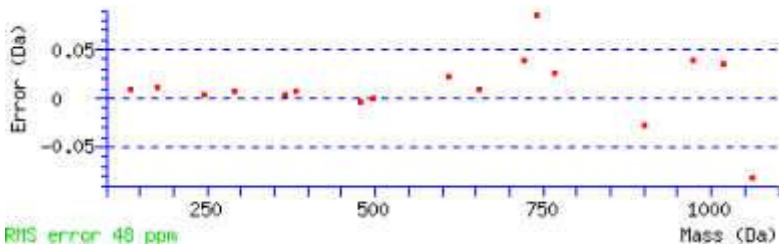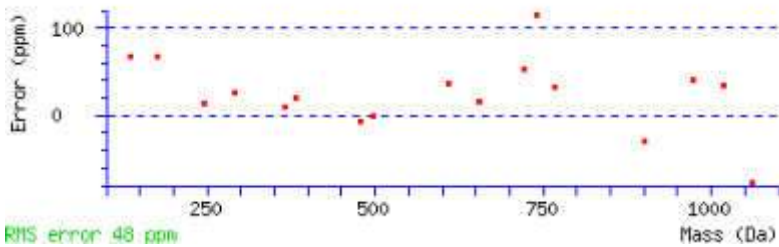

NCBI **BLAST** search of [YQAYELIHAR](#)

(Parameters: blastp, nr protein database, expect=20000, no filter, PAM30)

Other BLAST [web gateways](#)

#### All matches to this query

| Score | Mr(calc)  | Delta   | Sequence                     |
|-------|-----------|---------|------------------------------|
| 56.0  | 1262.6407 | 0.0506  | <a href="#">YQAYELIHAR</a>   |
| 28.7  | 1262.6077 | 0.0836  | <a href="#">YAGLDMTLHAR</a>  |
| 28.3  | 1262.6884 | 0.0030  | <a href="#">HQIFELIHAR</a>   |
| 27.4  | 1262.6077 | 0.0836  | <a href="#">YESVGTMIHAR</a>  |
| 26.6  | 1262.7247 | -0.0334 | <a href="#">HKEFIIHAR</a>    |
| 26.4  | 1262.6632 | 0.0281  | <a href="#">FGSGKHPGLHAR</a> |
| 24.9  | 1262.7207 | -0.0294 | <a href="#">AAGVEARLIHAR</a> |
| 24.9  | 1262.6190 | 0.0724  | <a href="#">EVCEHILHAR</a>   |
| 24.9  | 1262.7207 | -0.0294 | <a href="#">NNVQAKLLHAR</a>  |
| 24.9  | 1262.7247 | -0.0334 | <a href="#">QHLLYLHAR</a>    |

Mascot: <http://www.matrixscience.com/>

# MATRIX SCIENCE Mascot Search Results

## Peptide View **Spot no 34**

MS/MS Fragmentation of **FGANCGPEAVWFK**

Found in **gi|108864186** in **NCBI**nr, Chlorophyll A-B binding protein, expressed [Oryza sativa Japonica Group]

Match to Query 204: 1481.717824 from(1482.725100,1+) intensity(0.0000) index(17)

Title: Label: F7, Spot\_Id: 219775, Peak\_List\_Id: 226297, MSMS Job\_Run\_Id: 21839, Comment:

Data file C:\Documents and Settings\Administrator\Desktop\Farah-Garima 11May 2013\ppw\_F7\_136859913100.txt

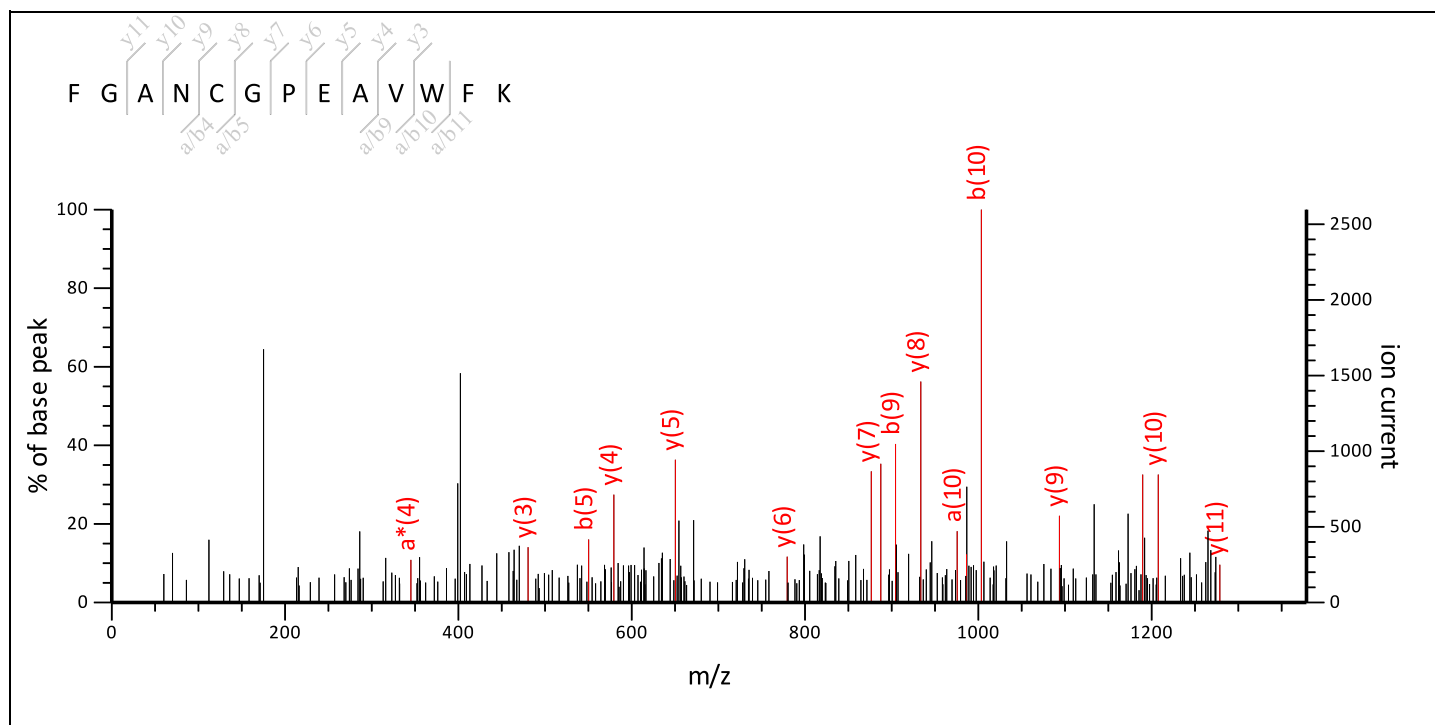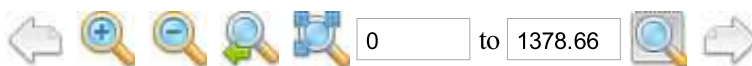

Label all possible matches  Label matches used for scoring

**Monoisotopic mass of neutral peptide Mr(calc):** 1481.6762

**Fixed modifications:** Carbamidomethyl (C) (apply to specified residues or termini only)

**Ions Score:** 27 **Expect:** 63

**Matches :** 19/66 fragment ions using 65 most intense peaks ([help](#))

| # | a        | a*       | b        | b*       | Seq. | y         | y*        | #  |
|---|----------|----------|----------|----------|------|-----------|-----------|----|
| 1 | 120.0808 |          | 148.0757 |          | F    |           |           | 13 |
| 2 | 177.1022 |          | 205.0972 |          | G    | 1335.6150 | 1318.5885 | 12 |
| 3 | 248.1394 |          | 276.1343 |          | A    | 1278.5936 | 1261.5670 | 11 |
| 4 | 362.1823 | 345.1557 | 390.1772 | 373.1506 | N    | 1207.5565 | 1190.5299 | 10 |
| 5 | 522.2129 | 505.1864 | 550.2078 | 533.1813 | C    | 1093.5135 | 1076.4870 | 9  |
| 6 | 579.2344 | 562.2078 | 607.2293 | 590.2028 | G    | 933.4829  | 916.4563  | 8  |
| 7 | 676.2872 | 659.2606 | 704.2821 | 687.2555 | P    | 876.4614  | 859.4349  | 7  |
| 8 | 805.3298 | 788.3032 | 833.3247 | 816.2981 | E    | 779.4087  | 762.3821  | 6  |

|    |           |           |           |           |   |          |          |   |
|----|-----------|-----------|-----------|-----------|---|----------|----------|---|
| 9  | 876.3669  | 859.3403  | 904.3618  | 887.3352  | A | 650.3661 | 633.3395 | 5 |
| 10 | 975.4353  | 958.4087  | 1003.4302 | 986.4036  | V | 579.3289 | 562.3024 | 4 |
| 11 | 1161.5146 | 1144.4880 | 1189.5095 | 1172.4830 | W | 480.2605 | 463.2340 | 3 |
| 12 | 1308.5830 | 1291.5565 | 1336.5779 | 1319.5514 | F | 294.1812 | 277.1547 | 2 |
| 13 |           |           |           |           | K | 147.1128 | 130.0863 | 1 |

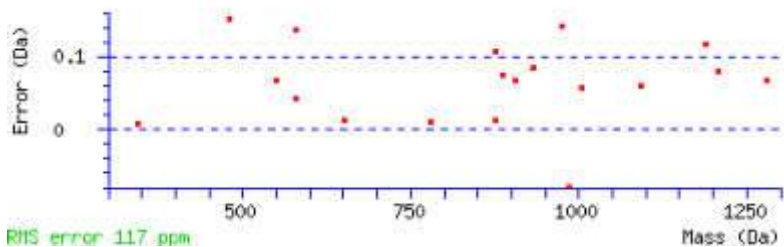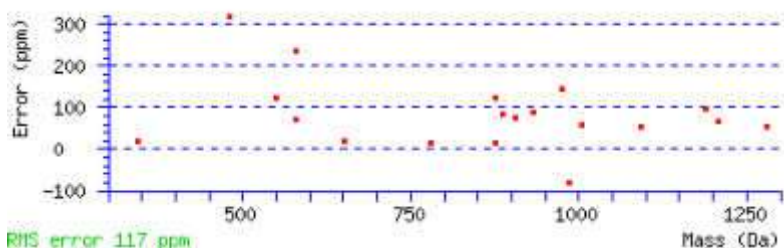

NCBI **BLAST** search of [FGANCGPEAVWFK](#)

(Parameters: blastp, nr protein database, expect=20000, no filter, PAM30)

Other BLAST [web gateways](#)

#### All matches to this query

| Score | Mr(calc)  | Delta   | Sequence                       |
|-------|-----------|---------|--------------------------------|
| 26.9  | 1481.6762 | 0.0416  | <a href="#">FGANCGPEAVWFK</a>  |
| 16.5  | 1481.6789 | 0.0389  | <a href="#">KMNCVPSNITMR</a>   |
| 15.7  | 1481.6966 | 0.0212  | <a href="#">SMDLSMTELGRAR</a>  |
| 15.2  | 1481.7548 | -0.0370 | <a href="#">TMTTVFDGTPKLR</a>  |
| 14.4  | 1481.7303 | -0.0125 | <a href="#">RPESIAYDAWFK</a>   |
| 13.7  | 1481.6892 | 0.0286  | <a href="#">QTEVGSSASRAMSR</a> |
| 13.6  | 1481.7514 | -0.0336 | <a href="#">DYAISPISAYINR</a>  |
| 13.6  | 1481.7667 | -0.0489 | <a href="#">VSYISPFTWINR</a>   |
| 13.3  | 1481.7548 | -0.0370 | <a href="#">LTAISMSLEFAQR</a>  |
| 13.2  | 1481.7184 | -0.0006 | <a href="#">RTDLMAAEGVEFK</a>  |

Mascot: <http://www.matrixscience.com/>



# Mascot Search Results

## Peptide View **Spot no 34**

MS/MS Fragmentation of **KPEDFSKYQAYELIHAR**

Found in **gi|108864186** in **NCBI**nr, Chlorophyll A-B binding protein, expressed [Oryza sativa Japonica Group]

Match to Query 302: 2094.141924 from(2095.149200,1+) intensity(0.0000) index(32)

Title: Label: F7, Spot\_Id: 219775, Peak\_List\_Id: 226300, MSMS Job\_Run\_Id: 21839, Comment:

Data file C:\Documents and Settings\Administrator\Desktop\Farah-Garima 11May 2013\ppw\_F7\_136859913100.txt

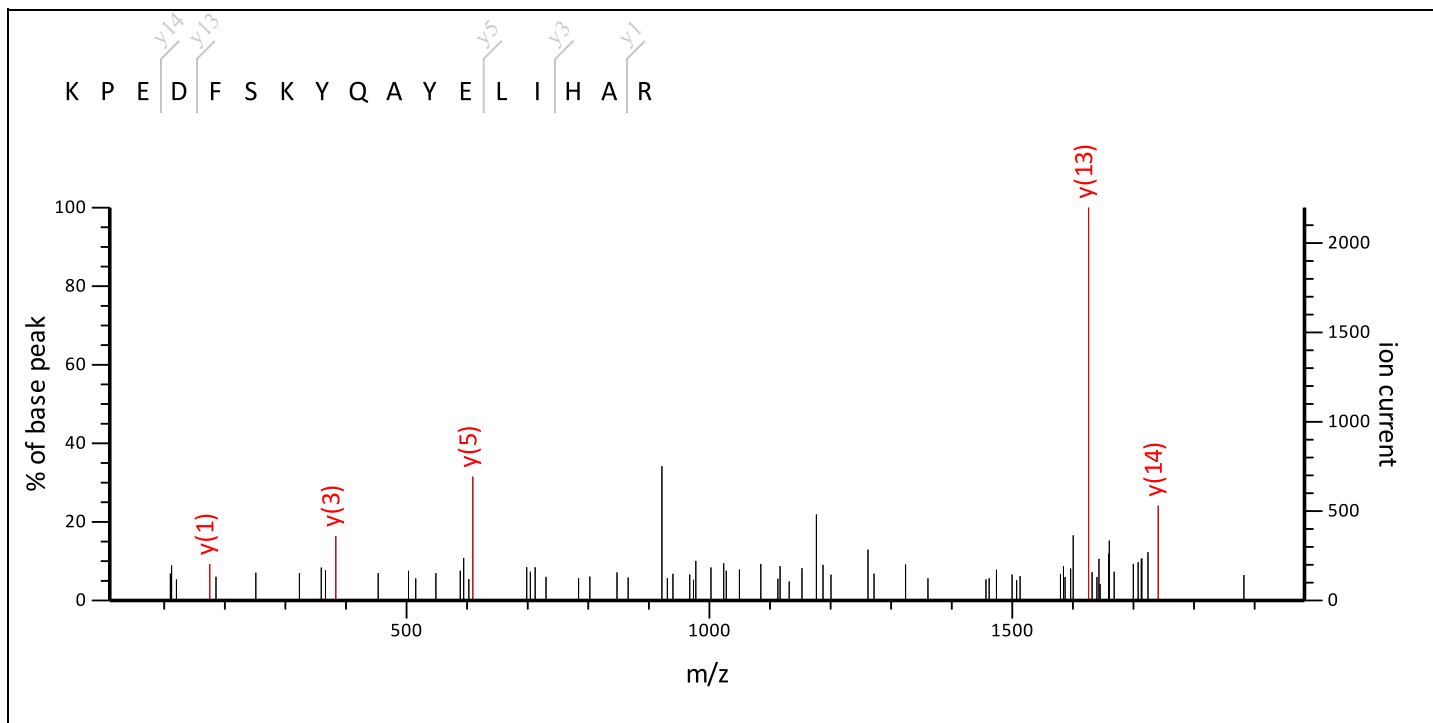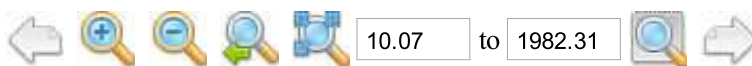

Label all possible matches  Label matches used for scoring

**Monoisotopic mass of neutral peptide Mr(calc):** 2094.0534

**Fixed modifications:** Carbamidomethyl (C) (apply to specified residues or termini only)

**Ions Score:** 12 **Expect:** 1.3e+03

**Matches :** 5/96 fragment ions using 18 most intense peaks ([help](#))

| # | a        | a*       | b        | b*       | Seq. | y                | y*        | #  |
|---|----------|----------|----------|----------|------|------------------|-----------|----|
| 1 | 101.1073 | 84.0808  | 129.1022 | 112.0757 | K    |                  |           | 17 |
| 2 | 198.1601 | 181.1335 | 226.1550 | 209.1285 | P    | 1966.9658        | 1949.9392 | 16 |
| 3 | 327.2027 | 310.1761 | 355.1976 | 338.1710 | E    | 1869.9130        | 1852.8864 | 15 |
| 4 | 442.2296 | 425.2031 | 470.2245 | 453.1980 | D    | <b>1740.8704</b> | 1723.8438 | 14 |
| 5 | 589.2980 | 572.2715 | 617.2930 | 600.2664 | F    | <b>1625.8435</b> | 1608.8169 | 13 |
| 6 | 676.3301 | 659.3035 | 704.3250 | 687.2984 | S    | 1478.7750        | 1461.7485 | 12 |
| 7 | 804.4250 | 787.3985 | 832.4199 | 815.3934 | K    | 1391.7430        | 1374.7165 | 11 |
| 8 | 967.4884 | 950.4618 | 995.4833 | 978.4567 | Y    | 1263.6480        | 1246.6215 | 10 |

|    |           |           |           |           |   |                 |           |   |
|----|-----------|-----------|-----------|-----------|---|-----------------|-----------|---|
| 9  | 1095.5469 | 1078.5204 | 1123.5419 | 1106.5153 | Q | 1100.5847       | 1083.5582 | 9 |
| 10 | 1166.5841 | 1149.5575 | 1194.5790 | 1177.5524 | A | 972.5261        | 955.4996  | 8 |
| 11 | 1329.6474 | 1312.6208 | 1357.6423 | 1340.6157 | Y | 901.4890        | 884.4625  | 7 |
| 12 | 1458.6900 | 1441.6634 | 1486.6849 | 1469.6583 | E | 738.4257        | 721.3991  | 6 |
| 13 | 1571.7740 | 1554.7475 | 1599.7690 | 1582.7424 | L | <b>609.3831</b> | 592.3566  | 5 |
| 14 | 1684.8581 | 1667.8316 | 1712.8530 | 1695.8265 | I | 496.2990        | 479.2725  | 4 |
| 15 | 1821.9170 | 1804.8905 | 1849.9119 | 1832.8854 | H | <b>383.2150</b> | 366.1884  | 3 |
| 16 | 1892.9541 | 1875.9276 | 1920.9490 | 1903.9225 | A | 246.1561        | 229.1295  | 2 |
| 17 |           |           |           |           | R | <b>175.1190</b> | 158.0924  | 1 |

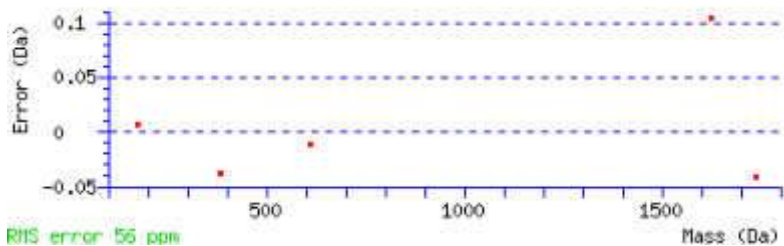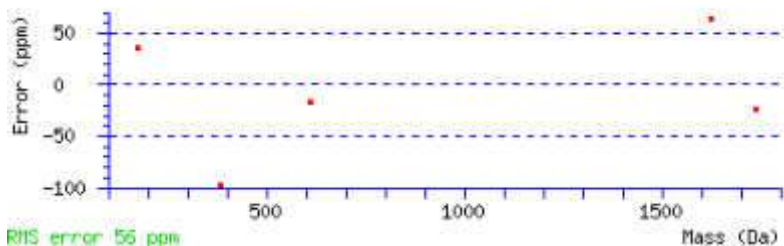

NCBI **BLAST** search of [KPEDFSKYQAYELIHAR](#)

(Parameters: blastp, nr protein database, expect=20000, no filter, PAM30)

Other BLAST [web gateways](#)

#### All matches to this query

| Score | Mr(calc)  | Delta  | Sequence                             |
|-------|-----------|--------|--------------------------------------|
| 12.4  | 2094.0534 | 0.0885 | <a href="#">KPEDFSKYQAYELIHAR</a>    |
| 11.8  | 2094.0528 | 0.0892 | <a href="#">KILDHISDVNMTLSEHAR</a>   |
| 9.5   | 2094.0337 | 0.1082 | <a href="#">LLAVPMTILAASTSDSEGMR</a> |
| 9.0   | 2094.1249 | 0.0170 | <a href="#">KLLDIGDFIGVEGELFTTK</a>  |
| 8.3   | 2094.0382 | 0.1038 | <a href="#">SINGFDVTDPOKALEAYAR</a>  |
| 3.9   | 2094.0390 | 0.1029 | <a href="#">LVPCNYQWLDTMISKAR</a>    |
| 3.3   | 2093.9726 | 0.1693 | <a href="#">KPDEDAVGSNRVDDVDAHR</a>  |
| 3.2   | 2094.0164 | 0.1256 | <a href="#">IIENNQHDPAEMLAQLSR</a>   |
| 3.1   | 2094.1222 | 0.0197 | <a href="#">TVVVASGASYRKPAVTGFER</a> |
| 3.1   | 2094.0858 | 0.0561 | <a href="#">KIIDHTSDVNFVLTEHAR</a>   |

Mascot: <http://www.matrixscience.com/>





# Mascot Search Results

## Peptide View **Spot no 34**

MS/MS Fragmentation of **HLSDPFGNNLLTVISGAAER**

Found in **gi|108864186** in **NCBIInr**, Chlorophyll A-B binding protein, expressed [Oryza sativa Japonica Group]

Match to Query 305: 2110.167524 from(2111.174800,1+) intensity(0.0000) index(33)

Title: Label: F7, Spot\_Id: 219775, Peak\_List\_Id: 226287, MSMS Job\_Run\_Id: 21839, Comment:

Data file C:\Documents and Settings\Administrator\Desktop\Farah-Garima 11May 2013\ppw\_F7\_136859913100.txt

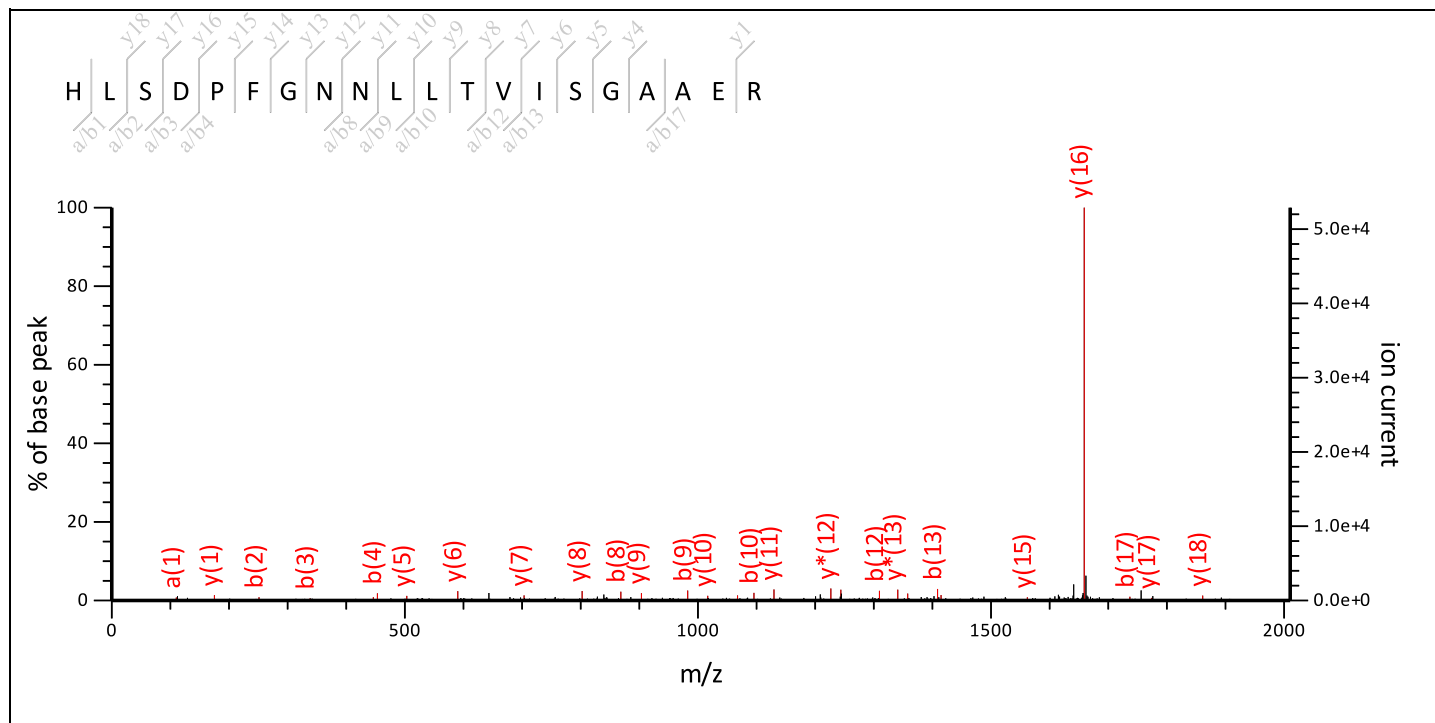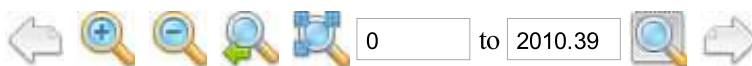

Label all possible matches  Label matches used for scoring

**Monoisotopic mass of neutral peptide Mr(calc):** 2110.0807

**Fixed modifications:** Carbamidomethyl (C) (apply to specified residues or termini only)

**Ions Score:** 110 **Expect:** 2.2e-07

**Matches :** 29/100 fragment ions using 57 most intense peaks ([help](#))

| # | a               | a*       | b               | b*       | Seq.     | y                | y*               | #         |
|---|-----------------|----------|-----------------|----------|----------|------------------|------------------|-----------|
| 1 | <b>110.0713</b> |          | 138.0662        |          | <b>H</b> |                  |                  | <b>20</b> |
| 2 | 223.1553        |          | <b>251.1503</b> |          | <b>L</b> | 1974.0291        | 1957.0025        | <b>19</b> |
| 3 | 310.1874        |          | <b>338.1823</b> |          | <b>S</b> | <b>1860.9450</b> | 1843.9185        | <b>18</b> |
| 4 | 425.2143        |          | <b>453.2092</b> |          | <b>D</b> | <b>1773.9130</b> | 1756.8864        | <b>17</b> |
| 5 | 522.2671        |          | 550.2620        |          | <b>P</b> | <b>1658.8860</b> | 1641.8595        | <b>16</b> |
| 6 | 669.3355        |          | 697.3304        |          | <b>F</b> | <b>1561.8333</b> | 1544.8067        | <b>15</b> |
| 7 | 726.3569        |          | 754.3519        |          | <b>G</b> | <b>1414.7649</b> | 1397.7383        | <b>14</b> |
| 8 | 840.3999        | 823.3733 | <b>868.3948</b> | 851.3682 | <b>N</b> | <b>1357.7434</b> | <b>1340.7169</b> | <b>13</b> |

|    |                  |           |                  |           |   |                  |                  |    |
|----|------------------|-----------|------------------|-----------|---|------------------|------------------|----|
| 9  | 954.4428         | 937.4163  | <b>982.4377</b>  | 965.4112  | N | <b>1243.7005</b> | <b>1226.6739</b> | 12 |
| 10 | <b>1067.5269</b> | 1050.5003 | <b>1095.5218</b> | 1078.4952 | L | <b>1129.6576</b> | 1112.6310        | 11 |
| 11 | 1180.6109        | 1163.5844 | 1208.6058        | 1191.5793 | L | <b>1016.5735</b> | 999.5469         | 10 |
| 12 | 1281.6586        | 1264.6321 | <b>1309.6535</b> | 1292.6270 | T | <b>903.4894</b>  | 886.4629         | 9  |
| 13 | 1380.7270        | 1363.7005 | <b>1408.7219</b> | 1391.6954 | V | <b>802.4417</b>  | 785.4152         | 8  |
| 14 | 1493.8111        | 1476.7845 | 1521.8060        | 1504.7795 | I | <b>703.3733</b>  | 686.3468         | 7  |
| 15 | 1580.8431        | 1563.8166 | 1608.8380        | 1591.8115 | S | <b>590.2893</b>  | 573.2627         | 6  |
| 16 | 1637.8646        | 1620.8380 | 1665.8595        | 1648.8329 | G | <b>503.2572</b>  | 486.2307         | 5  |
| 17 | 1708.9017        | 1691.8751 | <b>1736.8966</b> | 1719.8701 | A | <b>446.2358</b>  | 429.2092         | 4  |
| 18 | 1779.9388        | 1762.9123 | 1807.9337        | 1790.9072 | A | 375.1987         | 358.1721         | 3  |
| 19 | 1908.9814        | 1891.9549 | 1936.9763        | 1919.9498 | E | 304.1615         | 287.1350         | 2  |
| 20 |                  |           |                  |           | R | <b>175.1190</b>  | 158.0924         | 1  |

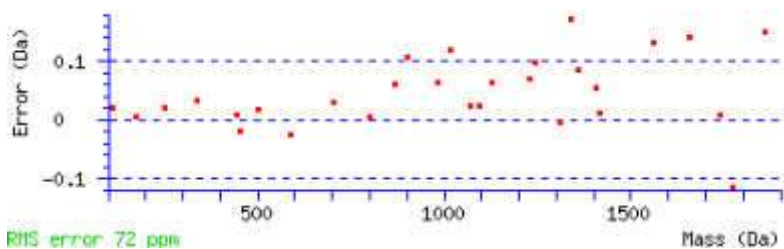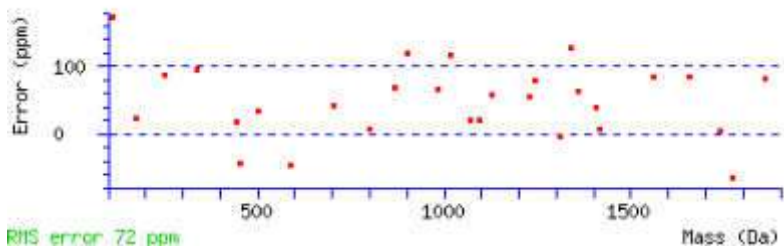

NCBI **BLAST** search of [HLSDPFGNLLTVISGAAER](#)

(Parameters: blastp, nr protein database, expect=20000, no filter, PAM30)

Other BLAST [web gateways](#)

#### All matches to this query

| Score | Mr(calc)  | Delta   | Sequence                             |
|-------|-----------|---------|--------------------------------------|
| 109.8 | 2110.0807 | 0.0868  | <a href="#">HLSDPFGNLLTVISGAAER</a>  |
| 96.2  | 2110.0807 | 0.0868  | <a href="#">HLSDPFGNLLTVISAGAER</a>  |
| 83.5  | 2110.0807 | 0.0868  | <a href="#">HLSDPFGNLLTVIAGSAER</a>  |
| 83.5  | 2110.0807 | 0.0868  | <a href="#">HLSDPFGNLLTVLAGSAER</a>  |
| 27.2  | 2110.2626 | -0.0951 | <a href="#">RFNQIHIPLLSLISINTR</a>   |
| 21.0  | 2110.0980 | 0.0695  | <a href="#">KYPEVVSIIIDTVSSMSALR</a> |
| 16.9  | 2110.1521 | 0.0154  | <a href="#">LEIPASLDIQAISGLSNELK</a> |
| 16.8  | 2110.0232 | 0.1443  | <a href="#">VGWDSITVDIQHGLHDYR</a>   |
| 14.1  | 2110.2051 | -0.0376 | <a href="#">LLEPGYLVRRSPVPVYR</a>    |
| 14.1  | 2110.0775 | 0.0900  | <a href="#">MAHPQALATLLATEGQMR</a>   |



# MATRIX SCIENCE Mascot Search Results

## Peptide View Spot no 36

### MS/MS Fragmentation of **LLPLRPGVQR**

Found in **gi|115453797** in **NCBI**nr, Os03g0565200 [Oryza sativa Japonica Group]

Match to Query 34: 1147.747824 from(1148.755100,1+) intensity(0.0000) index(8)

Title: Label: I10, Spot\_Id: 219826, Peak\_List\_Id: 226858, MSMS Job\_Run\_Id: 21858, Comment:

Data file C:\Documents and Settings\Administrator\Desktop\Farah-Garima 11May 2013\ppw\_I10\_136859951300.txt

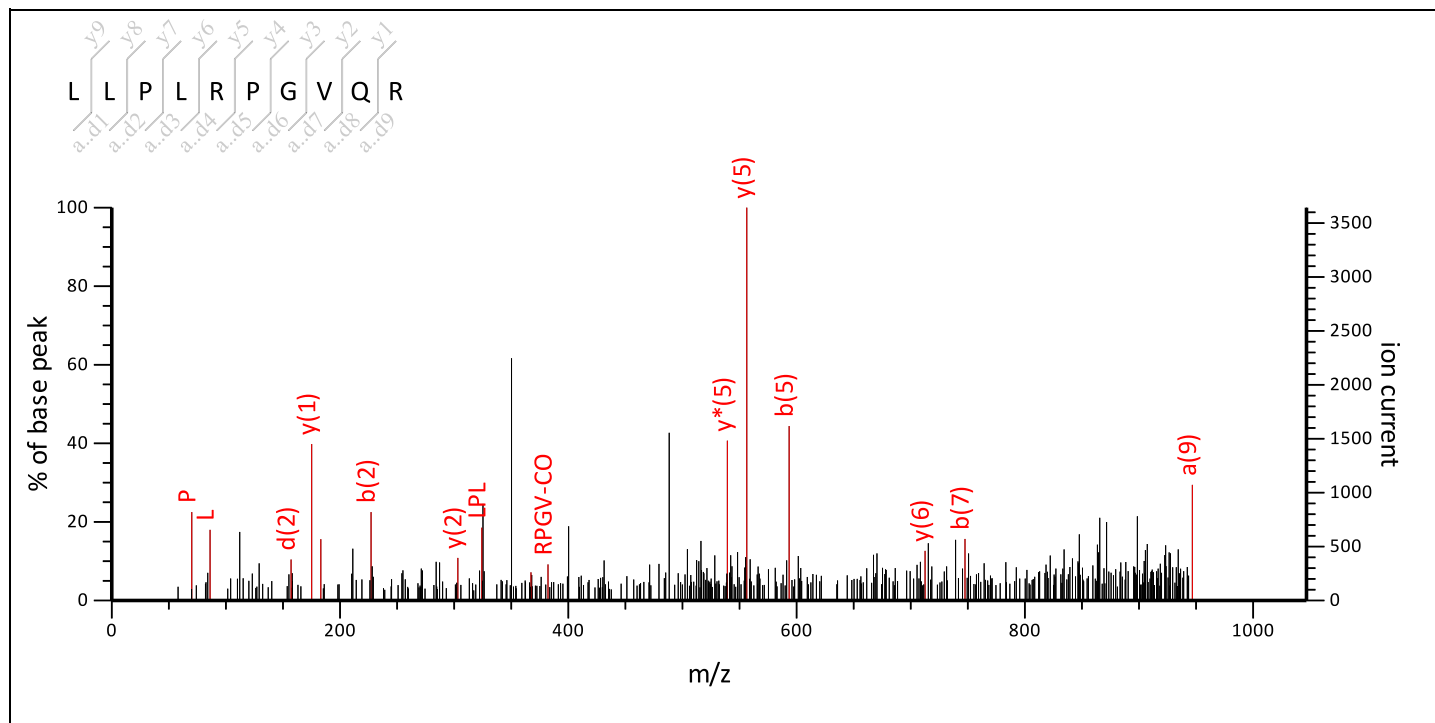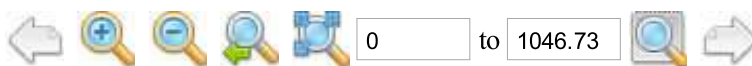

Label all possible matches  Label matches used for scoring

**Monoisotopic mass of neutral peptide Mr(calc):** 1147.7189

**Fixed modifications:** Carbamidomethyl (C) (apply to specified residues or termini only)

**Ions Score:** 21 **Expect:** 60

**Matches :** 28/130 fragment ions using 36 most intense peaks ([help](#))

| # | Immon.   | a              | a*       | b               | b*       | d               | Seq. | v        | w        | y               | y*              | #  |
|---|----------|----------------|----------|-----------------|----------|-----------------|------|----------|----------|-----------------|-----------------|----|
| 1 | 86.0964  | <b>86.0964</b> |          | 114.0913        |          | 44.0495         | L    |          |          |                 |                 | 10 |
| 2 | 86.0964  | 199.1805       |          | <b>227.1754</b> |          | <b>157.1335</b> | L    | 977.5639 | 976.5687 | 1035.6422       | 1018.6156       | 9  |
| 3 | 70.0651  | 296.2333       |          | <b>324.2282</b> |          | 270.2176        | P    | 880.5112 | 879.5159 | 922.5581        | 905.5316        | 8  |
| 4 | 86.0964  | 409.3173       |          | 437.3122        |          | <b>367.2704</b> | L    | 767.4271 | 766.4318 | 825.5053        | 808.4788        | 7  |
| 5 | 129.1135 | 565.4184       | 548.3919 | <b>593.4133</b> | 576.3868 | 480.3544        | R    | 611.3260 | 610.3307 | <b>712.4213</b> | 695.3947        | 6  |
| 6 | 70.0651  | 662.4712       | 645.4446 | 690.4661        | 673.4396 | 636.4555        | P    | 514.2732 | 513.2780 | <b>556.3202</b> | <b>539.2936</b> | 5  |
| 7 | 30.0338  | 719.4927       | 702.4661 | <b>747.4876</b> | 730.4610 |                 | G    |          |          | 459.2674        | 442.2409        | 4  |
| 8 | 72.0808  | 818.5611       | 801.5345 | 846.5560        | 829.5294 | 804.5454        | V    | 358.1833 | 371.2037 | 402.2459        | 385.2194        | 3  |

|    |          |          |          |          |          |          |   |          |          |          |          |   |
|----|----------|----------|----------|----------|----------|----------|---|----------|----------|----------|----------|---|
| 9  | 101.0709 | 946.6196 | 929.5931 | 974.6146 | 957.5880 | 889.5982 | Q | 230.1248 | 229.1295 | 303.1775 | 286.1510 | 2 |
| 10 | 129.1135 |          |          |          |          |          | R | 74.0237  | 73.0284  | 175.1190 | 158.0924 | 1 |

| Seq    | ya       | yb       | Seq    | ya       | yb       | Seq    | ya       | yb       |
|--------|----------|----------|--------|----------|----------|--------|----------|----------|
| LP     | 183.1492 | 211.1441 | LPL    | 296.2333 | 324.2282 | LPLR   | 452.3344 | 480.3293 |
| LPLRP  | 549.3871 | 577.3820 | LPLRPG | 606.4086 | 634.4035 | PL     | 183.1492 | 211.1441 |
| PLR    | 339.2503 | 367.2452 | PLRP   | 436.3031 | 464.2980 | PLRPG  | 493.3245 | 521.3194 |
| PLRPGV | 592.3929 | 620.3879 | LR     | 242.1975 | 270.1925 | LRP    | 339.2503 | 367.2452 |
| LRPG   | 396.2718 | 424.2667 | LRPGV  | 495.3402 | 523.3351 | LRPGVQ | 623.3988 | 651.3937 |
| RP     | 226.1662 | 254.1612 | RPG    | 283.1877 | 311.1826 | RPGV   | 382.2561 | 410.2510 |
| RPGVQ  | 510.3147 | 538.3096 | PG     | 127.0866 | 155.0815 | PGV    | 226.1550 | 254.1499 |
| PGVQ   | 354.2136 | 382.2085 | GV     | 129.1022 | 157.0972 | GVQ    | 257.1608 | 285.1557 |
| VQ     | 200.1394 | 228.1343 |        |          |          |        |          |          |

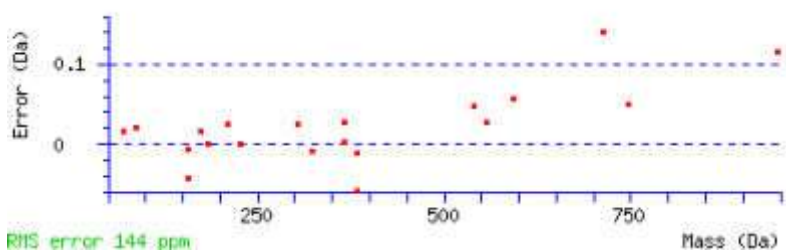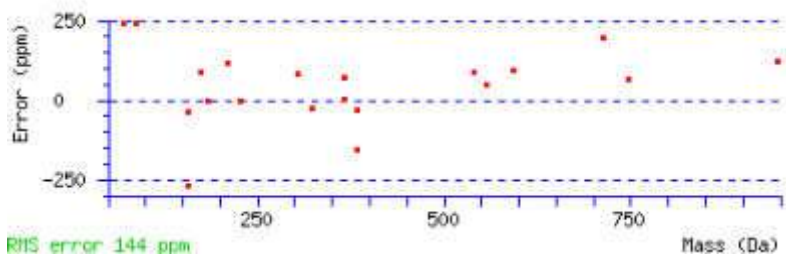

NCBI **BLAST** search of [LLPLRPGVQR](#)

(Parameters: blastp, nr protein database, expect=20000, no filter, PAM30)

Other BLAST [web gateways](#)

#### All matches to this query

| Score | Mr(calc)  | Delta  | Sequence                     |
|-------|-----------|--------|------------------------------|
| 25.5  | 1147.7189 | 0.0289 | <a href="#">RVPGIAPAIVR</a>  |
| 23.4  | 1147.6601 | 0.0877 | <a href="#">SDVVFILLSR</a>   |
| 22.6  | 1147.6350 | 0.1129 | <a href="#">QVSIGVYVAGR</a>  |
| 21.3  | 1147.7189 | 0.0289 | <a href="#">LLPLRPGVQR</a>   |
| 20.9  | 1147.6502 | 0.0976 | <a href="#">RVPYPVYVR</a>    |
| 19.9  | 1147.6462 | 0.1016 | <a href="#">IIGTAHGPGAVR</a> |
| 19.8  | 1147.6462 | 0.1017 | <a href="#">PSPIATAHAKR</a>  |
| 19.4  | 1147.6614 | 0.0864 | <a href="#">LPPVWRPAGR</a>   |
| 19.3  | 1147.6687 | 0.0792 | <a href="#">RTVARPGHVR</a>   |
| 19.1  | 1147.7077 | 0.0401 | <a href="#">ILGPVLGPQVR</a>  |



**MATRIX SCIENCE Mascot Search Results**

**Peptide View Spot no 36**

**MS/MS Fragmentation of ISFNETFAER**

Found in **gi|115453797** in **NCBI nr**, Os03g0565200 [Oryza sativa Japonica Group]

Match to Query 41: 1212.614924 from(1213.622200,1+) intensity(0.0000) index(11)

Title: Label: I10, Spot\_Id: 219826, Peak\_List\_Id: 226860, MSMS Job\_Run\_Id: 21858, Comment:

Data file C:\Documents and Settings\Administrator\Desktop\Farah-Garima 11May 2013\ppw\_I10\_136859951300.txt

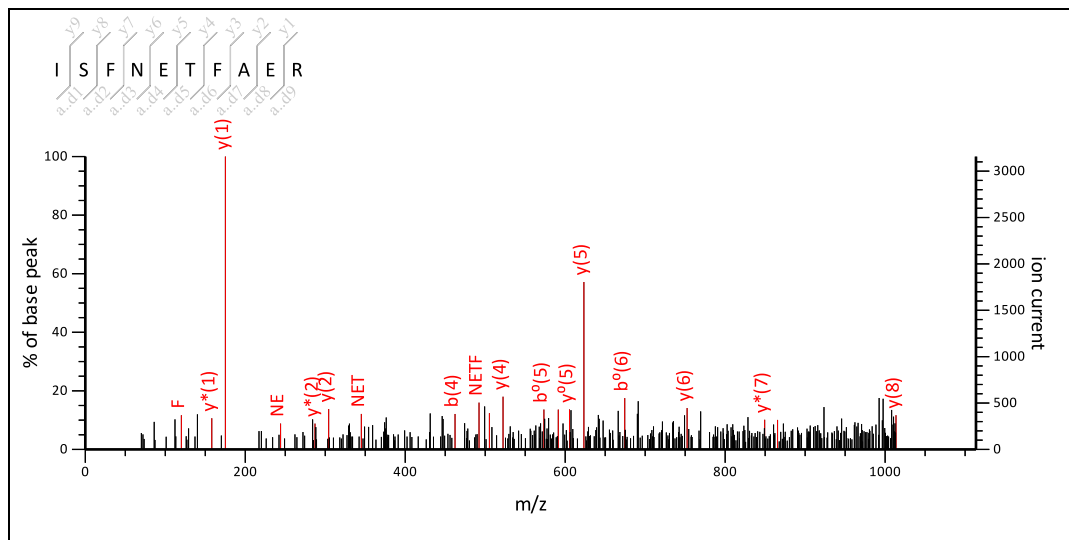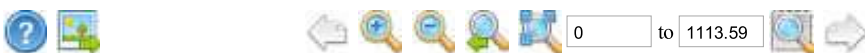

Label all possible matches  Label matches used for scoring

Monoisotopic mass of neutral peptide Mr(calc): 1212.5775

Fixed modifications: Carbamidomethyl (C) (apply to specified residues or termini only)

Ions Score: 26 Expect: 88

Matches : 23/153 fragment ions using 40 most intense peaks [\(help\)](#)

| #  | Immon.          | a         | a*              | a <sup>0</sup> | b               | b*        | b <sup>0</sup>  | d               | d'       | Seq. | v         | w         | w'       | y                | y*              | y <sup>0</sup> |
|----|-----------------|-----------|-----------------|----------------|-----------------|-----------|-----------------|-----------------|----------|------|-----------|-----------|----------|------------------|-----------------|----------------|
| 1  | 86.0964         | 86.0964   |                 |                | 114.0913        |           |                 | 44.0495         |          | I    |           |           |          |                  |                 |                |
| 2  | 60.0444         | 173.1285  |                 | 155.1179       | 201.1234        |           | 183.1128        | 157.1335        |          | S    | 1068.4745 | 1067.4793 |          | 1100.5007        | 1083.4742       | 1082.49        |
| 3  | <b>120.0808</b> | 320.1969  |                 | 302.1863       | 348.1918        |           | 330.1812        |                 |          | F    | 921.4061  |           |          | <b>1013.4687</b> | 996.4421        | 995.45         |
| 4  | 87.0553         | 434.2398  | 417.2132        | 416.2292       | <b>462.2347</b> | 445.2082  | 444.2241        | 391.2340        |          | N    | 807.3632  | 806.3679  |          | 866.4003         | <b>849.3737</b> | 848.38         |
| 5  | 102.0550        | 563.2824  | 546.2558        | 545.2718       | <b>591.2773</b> | 574.2508  | <b>573.2667</b> | <b>505.2769</b> |          | E    | 678.3206  | 677.3253  |          | <b>752.3573</b>  | 735.3308        | 734.34         |
| 6  | 74.0600         | 664.3301  | 647.3035        | 646.3195       | 692.3250        | 675.2984  | <b>674.3144</b> | 648.3352        | 650.3144 | T    | 577.2729  | 590.2933  | 592.2726 | <b>623.3148</b>  | 606.2882        | <b>605.30</b>  |
| 7  | <b>120.0808</b> | 811.3985  | 794.3719        | 793.3879       | 839.3934        | 822.3668  | 821.3828        |                 |          | F    | 430.2045  |           |          | <b>522.2671</b>  | <b>505.2405</b> | 504.25         |
| 8  | 44.0495         | 882.4356  | <b>865.4090</b> | 864.4250       | 910.4305        | 893.4040  | 892.4199        |                 |          | A    | 359.1674  |           |          | 375.1987         | 358.1721        | 357.18         |
| 9  | 102.0550        | 1011.4782 | 994.4516        | 993.4676       | 1039.4731       | 1022.4466 | 1021.4625       | 953.4727        |          | E    | 230.1248  | 229.1295  |          | <b>304.1615</b>  | <b>287.1350</b> | 286.15         |
| 10 | 129.1135        |           |                 |                |                 |           |                 |                 |          | R    | 74.0237   | 73.0284   |          | <b>175.1190</b>  | <b>158.0924</b> |                |

| Seq    | ya       | yb              | Seq    | ya       | yb              | Seq    | ya       | yb              |
|--------|----------|-----------------|--------|----------|-----------------|--------|----------|-----------------|
| SF     | 207.1128 | 235.1077        | SFNE   | 321.1557 | 349.1506        | SFNE   | 450.1983 | 478.1932        |
| SFNET  | 551.2460 | 579.2409        | SFNETF | 698.3144 | 726.3093        | FN     | 234.1237 | 262.1186        |
| FNE    | 363.1663 | 391.1612        | FNET   | 464.2140 | <b>492.2089</b> | FNETF  | 611.2824 | 639.2773        |
| FNETFA | 682.3195 | 710.3144        | NE     | 216.0979 | <b>244.0928</b> | NET    | 317.1456 | <b>345.1405</b> |
| NETF   | 464.2140 | <b>492.2089</b> | NETFA  | 535.2511 | 563.2460        | NETFAE | 664.2937 | 692.2886        |
| ET     | 203.1026 | 231.0975        | ETF    | 350.1710 | 378.1660        | ETFA   | 421.2082 | 449.2031        |
| ETFAE  | 550.2508 | 578.2457        | TF     | 221.1285 | 249.1234        | TFA    | 292.1656 | 320.1605        |
| TFAE   | 421.2082 | 449.2031        | FA     | 191.1179 | 219.1128        | FAE    | 320.1605 | 348.1554        |
| AE     | 173.0921 | 201.0870        |        |          |                 |        |          |                 |



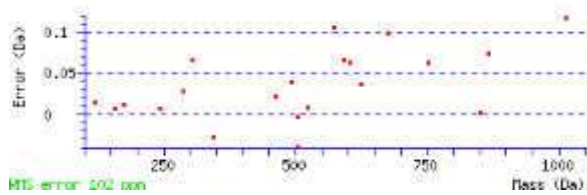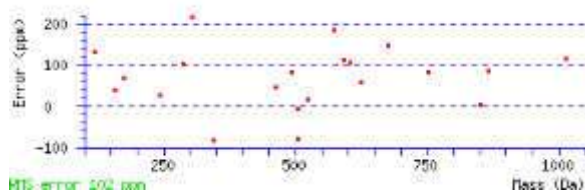

NCBI BLAST search of [ISENETFAER](#)

(Parameters: blastp, nr protein database, expect=20000, no filter, PAM30)

Other BLAST [web gateways](#)

**All matches to this query**

| Score | Mr(calc)  | Delta   | Sequence                    |
|-------|-----------|---------|-----------------------------|
| 26.3  | 1212.5775 | 0.0374  | <a href="#">ISENETFAER</a>  |
| 24.8  | 1212.5696 | 0.0453  | <a href="#">SEASSTMIFPK</a> |
| 19.4  | 1212.5921 | 0.0228  | <a href="#">YGSQKMKPSSR</a> |
| 18.9  | 1212.6172 | -0.0023 | <a href="#">TAAFSLTMSR</a>  |
| 18.6  | 1212.6099 | 0.0051  | <a href="#">OPOADPTISR</a>  |
| 18.6  | 1212.5258 | 0.0891  | <a href="#">SESAFETASER</a> |
| 18.2  | 1212.5775 | 0.0374  | <a href="#">QDYFPTISR</a>   |
| 17.1  | 1212.5631 | 0.0518  | <a href="#">MFVEAGAMAVR</a> |
| 17.0  | 1212.5445 | 0.0704  | <a href="#">LSDSTFADMAR</a> |
| 16.9  | 1212.5775 | 0.0374  | <a href="#">QDYFPTLSSR</a>  |

Mascot: <http://www.matrixscience.com/>


**Mascot Search Results**
**Peptide View Spot no 36**

 MS/MS Fragmentation of **AVSAIVSCLLPDR**

 Found in **gi115453797** in **NCBIInr**, Os03g0565200 [Oryza sativa Japonica Group]

Match to Query 54: 1456.804124 from(1457.811400,1+) intensity(0.0000) index(17)

Title: Label: I10, Spot\_Id: 219826, Peak\_List\_Id: 226864, MSMS Job\_Run\_Id: 21858, Comment:

Data file C:\Documents and Settings\Administrator\Desktop\Farah-Garima 11May 2013\ppw\_I10\_136859951300.txt

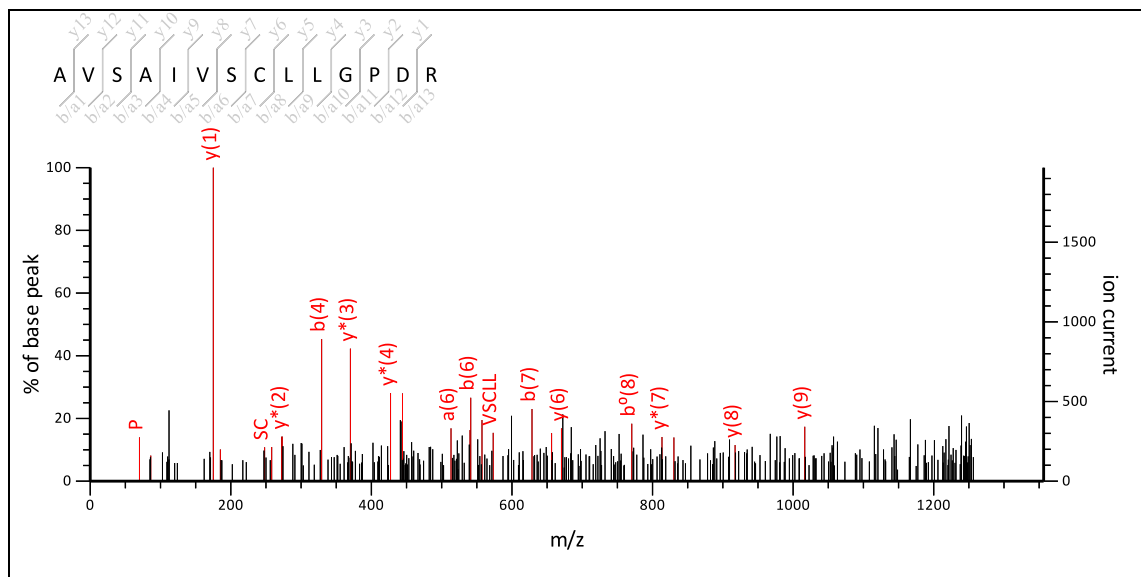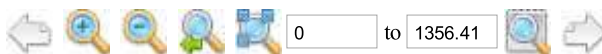
 Label all possible matches  Label matches used for scoring 

 Monoisotopic mass of neutral peptide  $M_r(\text{calc})$ : 1456.7708

Fixed modifications: Carbamidomethyl (C) (apply to specified residues or termini only)

Ions Score: 32 Expect: 19

 Matches : 40/228 fragment ions using 48 most intense peaks ([help](#))

| #  | Immon.         | a               | a <sup>0</sup> | b               | b <sup>0</sup>  | d         | d <sup>t</sup> | Seq. | v         | w         | w <sup>t</sup> | y                | y <sup>*</sup>  | y <sup>0</sup>  | #  |
|----|----------------|-----------------|----------------|-----------------|-----------------|-----------|----------------|------|-----------|-----------|----------------|------------------|-----------------|-----------------|----|
| 1  | 44.0495        | 44.0495         |                | 72.0444         |                 | 44.0495   |                | A    |           |           |                |                  |                 |                 | 14 |
| 2  | 72.0808        | 143.1179        |                | 171.1128        |                 | 129.1022  |                | V    | 1342.6784 | 1355.6988 |                | 1386.7410        | 1369.7144       | 1368.7304       | 13 |
| 3  | 60.0444        | 230.1499        | 212.1394       | <b>258.1448</b> | 240.1343        | 214.1550  |                | S    | 1255.6463 | 1254.6511 |                | 1287.6725        | 1270.6460       | 1269.6620       | 12 |
| 4  | 44.0495        | 301.1870        | 283.1765       | <b>329.1819</b> | 311.1714        |           |                | A    | 1184.6092 |           |                | 1200.6405        | 1183.6140       | 1182.6300       | 11 |
| 5  | <b>86.0964</b> | 414.2711        | 396.2605       | 442.2660        | 424.2554        | 386.2398  | 400.2554       | I    | 1071.5252 | 1084.5456 | 1098.5612      | 1129.6034        | 1112.5769       | 1111.5928       | 10 |
| 6  | 72.0808        | <b>513.3395</b> | 495.3289       | <b>541.3344</b> | 523.3239        | 499.3239  |                | V    | 972.4567  | 985.4771  |                | <b>1016.5193</b> | 999.4928        | 998.5088        | 9  |
| 7  | 60.0444        | 600.3715        | 582.3610       | <b>628.3665</b> | 610.3559        | 584.3766  |                | S    | 885.4247  | 884.4295  |                | <b>917.4509</b>  | 900.4244        | 899.4404        | 8  |
| 8  | 133.0430       | 760.4022        | 742.3916       | 788.3971        | <b>770.3865</b> | 671.4087  |                | C    | 725.3941  | 724.3988  |                | <b>830.4189</b>  | <b>813.3924</b> | 812.4083        | 7  |
| 9  | <b>86.0964</b> | 873.4863        | 855.4757       | 901.4812        | 883.4706        | 831.4393  |                | L    | 612.3100  | 611.3148  |                | <b>670.3883</b>  | 653.3617        | 652.3777        | 6  |
| 10 | <b>86.0964</b> | 986.5703        | 968.5597       | 1014.5652       | 996.5547        | 944.5234  |                | L    | 499.2259  | 498.2307  |                | <b>557.3042</b>  | <b>540.2776</b> | 539.2936        | 5  |
| 11 | 30.0338        | 1043.5918       | 1025.5812      | 1071.5867       | 1053.5761       |           |                | G    |           |           |                | <b>444.2201</b>  | <b>427.1936</b> | 426.2096        | 4  |
| 12 | <b>70.0651</b> | 1140.6445       | 1122.6340      | 1168.6395       | 1150.6289       | 1114.6289 |                | P    | 345.1517  | 344.1565  |                | 387.1987         | <b>370.1721</b> | 369.1881        | 3  |
| 13 | 88.0393        | 1255.6715       | 1237.6609      | 1283.6664       | 1265.6558       | 1211.6817 |                | D    | 230.1248  | 229.1295  |                | 290.1459         | <b>273.1193</b> | <b>272.1353</b> | 2  |
| 14 | 129.1135       |                 |                |                 |                 |           |                | R    | 74.0237   | 73.0284   |                | <b>175.1190</b>  | 158.0924        |                 | 1  |

| Seq   | ya       | yb       | Seq    | ya       | yb              | Seq     | ya       | yb       |
|-------|----------|----------|--------|----------|-----------------|---------|----------|----------|
| VS    | 159.1128 | 187.1077 | VSA    | 230.1499 | <b>258.1448</b> | VSAI    | 343.2340 | 371.2289 |
| VSAIV | 442.3024 | 470.2973 | VSAIVS | 529.3344 | <b>557.3293</b> | VSAIVSC | 689.3651 | 717.3600 |
| SA    | 131.0815 | 159.0764 | SAI    | 244.1656 | <b>272.1605</b> | SAIV    | 343.2340 | 371.2289 |

|        |          |          |        |          |          |         |          |          |
|--------|----------|----------|--------|----------|----------|---------|----------|----------|
| SAIVS  | 430.2660 | 458.2609 | SAIVSC | 590.2967 | 618.2916 | AI      | 157.1335 | 185.1285 |
| AIV    | 256.2020 | 284.1969 | AIVS   | 343.2340 | 371.2289 | AIVSC   | 503.2646 | 531.2595 |
| AIVSCL | 616.3487 | 644.3436 | IV     | 185.1648 | 213.1598 | IVS     | 272.1969 | 300.1918 |
| IVSC   | 432.2275 | 460.2224 | IVSCL  | 545.3116 | 573.3065 | IVSCLL  | 658.3956 | 686.3906 |
| VS     | 159.1128 | 187.1077 | VSC    | 319.1435 | 347.1384 | VSCL    | 432.2275 | 460.2224 |
| VSCLL  | 545.3116 | 573.3065 | VSCLLG | 602.3330 | 630.3280 | VSCLLGP | 699.3858 | 727.3807 |
| SC     | 220.0750 | 248.0700 | SCL    | 333.1591 | 361.1540 | SCLL    | 446.2432 | 474.2381 |
| SCLLG  | 503.2646 | 531.2595 | SCLLGP | 600.3174 | 628.3123 | CL      | 246.1271 | 274.1220 |
| CLL    | 359.2111 | 387.2061 | CLLG   | 416.2326 | 444.2275 | CLLGP   | 513.2854 | 541.2803 |
| CLLGP  | 628.3123 | 656.3072 | LL     | 199.1805 | 227.1754 | LLG     | 256.2020 | 284.1969 |
| LLGP   | 353.2547 | 381.2496 | LLGPD  | 468.2817 | 496.2766 | LG      | 143.1179 | 171.1128 |
| LGP    | 240.1707 | 268.1656 | LGP    | 355.1976 | 383.1925 | GP      | 127.0866 | 155.0815 |
| GPD    | 242.1135 | 270.1084 | PD     | 185.0921 | 213.0870 |         |          |          |

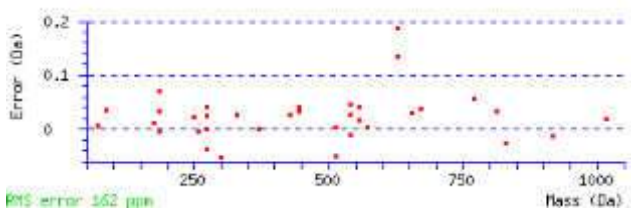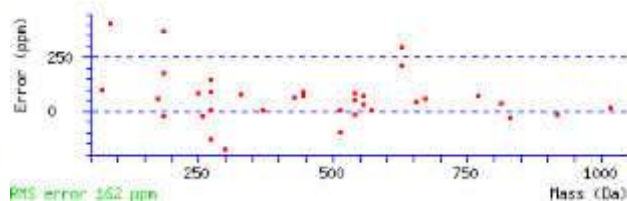

NCBI BLAST search of [AVSAIVSCLLGPDR](#)

(Parameters: blastp, nr protein database, expect=20000, no filter, PAM30)

Other BLAST [web gateways](#)

#### All matches to this query

| Score | Mr(calc)  | Delta   | Sequence                        |
|-------|-----------|---------|---------------------------------|
| 32.1  | 1456.7708 | 0.0333  | <a href="#">AVSAIVSCLLGPDR</a>  |
| 28.9  | 1456.8110 | -0.0069 | <a href="#">ALSGIVSGONSRLR</a>  |
| 24.9  | 1456.7787 | 0.0255  | <a href="#">FAVAAGPDGVERIR</a>  |
| 23.6  | 1456.7998 | 0.0044  | <a href="#">AAELGDAILSRSVR</a>  |
| 23.3  | 1456.7820 | 0.0221  | <a href="#">TRIVAMASAGVEPR</a>  |
| 22.8  | 1456.7860 | 0.0181  | <a href="#">SLGALMGISVWAPR</a>  |
| 21.9  | 1456.7708 | 0.0334  | <a href="#">QEALADLLMAQVR</a>   |
| 21.6  | 1456.7932 | 0.0109  | <a href="#">RANANAVGVGLMLR</a>  |
| 21.4  | 1456.7708 | 0.0333  | <a href="#">LVDCPLAISDRAK</a>   |
| 20.6  | 1456.7886 | 0.0155  | <a href="#">SSVEVAVTGSGLPVR</a> |

Mascot: <http://www.matrixscience.com/>

**MATRIX SCIENCE Mascot Search Results**

**Peptide View Spot no 36**

MS/MS Fragmentation of **AVSAIVSCLLGPDRAEK**

Found in **gi|115453797** in **NCBI nr**, Os03g0565200 [Oryza sativa Japonica Group]

Match to Query 72: 1784.986024 from(1785.993300,1+) intensity(0.0000) index(25)

Title: Label: I10, Spot\_Id: 219826, Peak\_List\_Id: 226859, MSMS Job\_Run\_Id: 21858, Comment:

Data file C:\Documents and Settings\Administrator\Desktop\Farah-Garima 11May 2013\ppw\_I10\_136859951300.txt

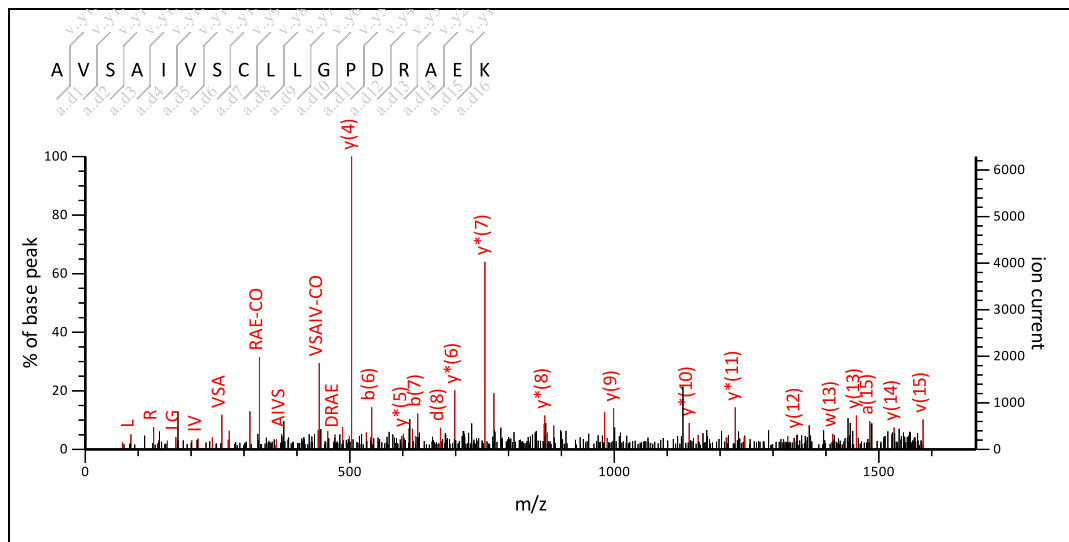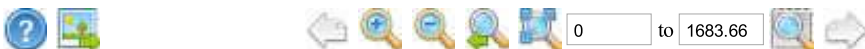

Label all possible matches  Label matches used for scoring

Monoisotopic mass of neutral peptide Mr(calc): 1784.9454

Fixed modifications: Carbamidomethyl (C) (apply to specified residues or termini only)

Ions Score: 43 Expect: 1.3

Matches : 89/296 fragment ions using 158 most intense peaks [\(help\)](#)

| #  | Immon.   | a         | a*        | a <sup>0</sup> | b         | b*        | b <sup>0</sup> | d         | d'       | Seq. | v         | w         | w'        | y         | y*        |
|----|----------|-----------|-----------|----------------|-----------|-----------|----------------|-----------|----------|------|-----------|-----------|-----------|-----------|-----------|
| 1  | 44.0495  | 44.0495   |           |                | 72.0444   |           |                | 44.0495   |          | A    |           |           |           |           |           |
| 2  | 72.0808  | 143.1179  |           |                | 171.1128  |           |                | 129.1022  |          | V    | 1670.8530 | 1683.8734 |           | 1714.9156 | 1697.8891 |
| 3  | 60.0444  | 230.1499  |           | 212.1394       | 258.1448  |           | 240.1343       | 214.1550  |          | S    | 1583.8210 | 1582.8258 |           | 1615.8472 | 1598.8207 |
| 4  | 44.0495  | 301.1870  |           | 283.1765       | 329.1819  |           | 311.1714       |           |          | A    | 1512.7839 |           |           | 1528.8152 | 1511.7886 |
| 5  | 86.0964  | 414.2711  |           | 396.2605       | 442.2660  |           | 424.2554       | 386.2398  | 400.2554 | I    | 1399.6998 | 1412.7202 | 1426.7359 | 1457.7781 | 1440.7515 |
| 6  | 72.0808  | 513.3395  |           | 495.3289       | 541.3344  |           | 523.3239       | 499.3239  |          | V    | 1300.6314 | 1313.6518 |           | 1344.6940 | 1327.6675 |
| 7  | 60.0444  | 600.3715  |           | 582.3610       | 628.3665  |           | 610.3559       | 584.3766  |          | S    | 1213.5994 | 1212.6041 |           | 1245.6256 | 1228.5990 |
| 8  | 133.0430 | 760.4022  |           | 742.3916       | 788.3971  |           | 770.3865       | 671.4087  |          | C    | 1053.5687 | 1052.5735 |           | 1158.5936 | 1141.5670 |
| 9  | 86.0964  | 873.4863  |           | 855.4757       | 901.4812  |           | 883.4706       | 831.4393  |          | L    | 940.4847  | 939.4894  |           | 998.5629  | 981.5364  |
| 10 | 86.0964  | 986.5703  |           | 968.5597       | 1014.5652 |           | 996.5547       | 944.5234  |          | L    | 827.4006  | 826.4054  |           | 885.4789  | 868.4523  |
| 11 | 30.0338  | 1043.5918 |           | 1025.5812      | 1071.5867 |           | 1053.5761      |           |          | G    |           |           |           | 772.3948  | 755.3682  |
| 12 | 70.0651  | 1140.6445 |           | 1122.6340      | 1168.6395 |           | 1150.6289      | 1114.6289 |          | P    | 673.3264  | 672.3311  |           | 715.3733  | 698.3468  |
| 13 | 88.0393  | 1255.6715 |           | 1237.6609      | 1283.6664 |           | 1265.6558      | 1211.6817 |          | D    | 558.2994  | 557.3042  |           | 618.3206  | 601.2940  |
| 14 | 129.1135 | 1411.7726 | 1394.7460 | 1393.7620      | 1439.7675 | 1422.7410 | 1421.7569      | 1326.7086 |          | R    | 402.1983  | 401.2031  |           | 503.2936  | 486.2671  |
| 15 | 44.0495  | 1482.8097 | 1465.7832 | 1464.7991      | 1510.8046 | 1493.7781 | 1492.7941      |           |          | A    | 331.1612  |           |           | 347.1925  | 330.1660  |
| 16 | 102.0550 | 1611.8523 | 1594.8258 | 1593.8417      | 1639.8472 | 1622.8207 | 1621.8367      | 1553.8468 |          | E    | 202.1186  | 201.1234  |           | 276.1554  | 259.1288  |
| 17 | 101.1073 |           |           |                |           |           |                |           |          | K    | 74.0237   | 73.0284   |           | 147.1128  | 130.0863  |

| Seq   | ya       | yb       | Seq    | ya       | yb       | Seq     | ya       | yb       |
|-------|----------|----------|--------|----------|----------|---------|----------|----------|
| VS    | 159.1128 | 187.1077 | VSA    | 230.1499 | 258.1448 | VSAI    | 343.2340 | 371.2289 |
| VSAIV | 442.3024 | 470.2973 | VSAIVS | 529.3344 | 557.3293 | VSAIVSC | 689.3651 | 717.3600 |
| SA    | 131.0815 | 159.0764 | SAI    | 244.1656 | 272.1605 | SAIV    | 343.2340 | 371.2289 |
| SAIVS | 430.2660 | 458.2609 | SAIVSC | 590.2967 | 618.2916 | AI      | 157.1335 | 185.1285 |

|                |                 |                 |               |                 |                 |                |                 |                 |
|----------------|-----------------|-----------------|---------------|-----------------|-----------------|----------------|-----------------|-----------------|
| <b>AIV</b>     | 256.2020        | 284.1969        | <b>AIVS</b>   | 343.2340        | <b>371.2289</b> | <b>AIVSC</b>   | <b>503.2646</b> | <b>531.2595</b> |
| <b>AIVSCL</b>  | 616.3487        | 644.3436        | <b>IV</b>     | <b>185.1648</b> | <b>213.1598</b> | <b>IVS</b>     | <b>272.1969</b> | 300.1918        |
| <b>IVSC</b>    | 432.2275        | 460.2224        | <b>IVSCL</b>  | 545.3116        | 573.3065        | <b>IVSCLL</b>  | 658.3956        | 686.3906        |
| <b>VS</b>      | 159.1128        | 187.1077        | <b>VSC</b>    | 319.1435        | <b>347.1384</b> | <b>VSCL</b>    | 432.2275        | 460.2224        |
| <b>VSCLL</b>   | 545.3116        | 573.3065        | <b>VSCLLG</b> | 602.3330        | 630.3280        | <b>VSCLLGP</b> | 699.3858        | 727.3807        |
| <b>SC</b>      | 220.0750        | 248.0700        | <b>SCL</b>    | 333.1591        | <b>361.1540</b> | <b>SCLL</b>    | 446.2432        | 474.2381        |
| <b>SCLLG</b>   | <b>503.2646</b> | <b>531.2595</b> | <b>SCLLGP</b> | 600.3174        | <b>628.3123</b> | <b>CL</b>      | 246.1271        | 274.1220        |
| <b>CLL</b>     | 359.2111        | 387.2061        | <b>CLLG</b>   | 416.2326        | <b>444.2275</b> | <b>CLLGP</b>   | 513.2854        | <b>541.2803</b> |
| <b>CLLGPD</b>  | <b>628.3123</b> | 656.3072        | <b>LL</b>     | 199.1805        | 227.1754        | <b>LLG</b>     | 256.2020        | 284.1969        |
| <b>LLGP</b>    | 353.2547        | 381.2496        | <b>LLGPD</b>  | 468.2817        | 496.2766        | <b>LLGPDR</b>  | <b>624.3828</b> | 652.3777        |
| <b>LLGPDRA</b> | 695.4199        | 723.4148        | <b>LG</b>     | 143.1179        | <b>171.1128</b> | <b>LGP</b>     | <b>240.1707</b> | 268.1656        |
| <b>LGPD</b>    | 355.1976        | 383.1925        | <b>LGPDR</b>  | 511.2987        | <b>539.2936</b> | <b>LGPDRA</b>  | 582.3358        | 610.3307        |
| <b>GP</b>      | <b>127.0866</b> | <b>155.0815</b> | <b>GPD</b>    | 242.1135        | <b>270.1084</b> | <b>GPDR</b>    | 398.2146        | 426.2096        |
| <b>GPDRA</b>   | 469.2518        | 497.2467        | <b>GPDRAE</b> | <b>598.2944</b> | 626.2893        | <b>PD</b>      | <b>185.0921</b> | <b>213.0870</b> |
| <b>PDR</b>     | 341.1932        | 369.1881        | <b>PDRA</b>   | 412.2303        | <b>440.2252</b> | <b>PDRAE</b>   | <b>541.2729</b> | 569.2678        |
| <b>DR</b>      | 244.1404        | <b>272.1353</b> | <b>DRA</b>    | 315.1775        | 343.1724        | <b>DRAE</b>    | <b>444.2201</b> | <b>472.2150</b> |
| <b>RA</b>      | 200.1506        | 228.1455        | <b>RAE</b>    | <b>329.1932</b> | <b>357.1881</b> | <b>AE</b>      | 173.0921        | <b>201.0870</b> |

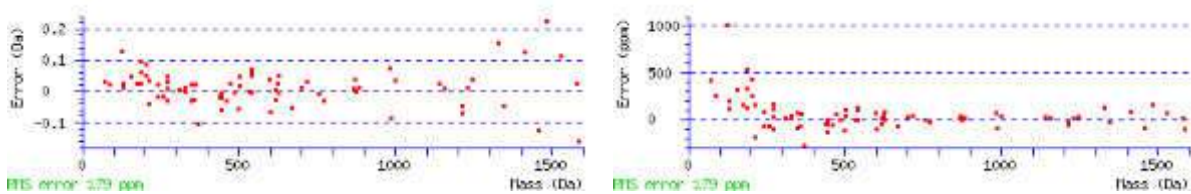

NCBI BLAST search of [AVSAIVSCLLGPDRAEK](#)

(Parameters: blastp, nr protein database, expect=20000, no filter, PAM30)

Other BLAST [web gateways](#)

#### All matches to this query

| Score | Mr(calc)  | Delta   | Sequence                          |
|-------|-----------|---------|-----------------------------------|
| 45.2  | 1784.9454 | 0.0406  | <a href="#">LNEIVACLLSAKSDPR</a>  |
| 43.0  | 1784.9454 | 0.0406  | <a href="#">AVSAIVSCLLGPDRAEK</a> |
| 33.0  | 1784.9632 | 0.0228  | <a href="#">TIAASDPELGLSLKNTR</a> |
| 32.8  | 1784.9156 | 0.0704  | <a href="#">QELAPSEDOASVLTAVK</a> |
| 30.6  | 1784.9380 | 0.0480  | <a href="#">AGLSLEGEIRDSQAALR</a> |
| 29.2  | 1784.8839 | 0.1021  | <a href="#">QLDLMAQONDPOKTR</a>   |
| 28.5  | 1784.9533 | 0.0327  | <a href="#">LDAAAVSFILRHSETR</a>  |
| 27.6  | 1784.9897 | -0.0037 | <a href="#">FPGTQLRLLTATPSQR</a>  |
| 26.6  | 1784.9632 | 0.0228  | <a href="#">GISAKLSDLLQDLOER</a>  |
| 26.6  | 1784.9057 | 0.0803  | <a href="#">EAGALOOGLPVFSSPER</a> |

Mascot: <http://www.matrixscience.com/>


**Mascot Search Results**
**Peptide View Spot no 36**
MS/MS Fragmentation of **SGYTAEDFATADAVFDCIGDPPEVR**Found in **gi115453797** in **NCBIInr**, Os03g0565200 [Oryza sativa Japonica Group]

Match to Query 79: 2831.283024 from(2832.290300,1+) intensity(0.0000) index(27)

Title: Label: I10, Spot\_Id: 219826, Peak\_List\_Id: 226876, MSMS Job\_Run\_Id: 21858, Comment:

Data file C:\Documents and Settings\Administrator\Desktop\Farah-Garima 11May 2013\ppw\_I10\_136859951300.txt

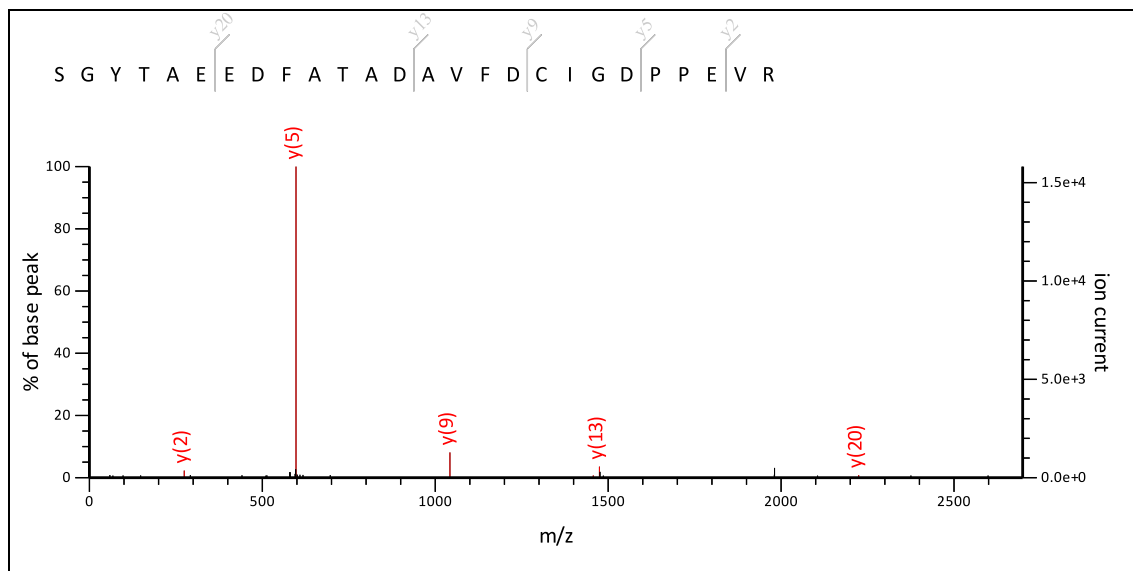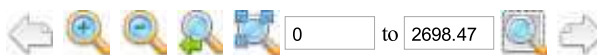Label all possible matches  Label matches used for scoring 

Monoisotopic mass of neutral peptide Mr(calc): 2831.2232

Fixed modifications: Carbamidomethyl (C) (apply to specified residues or termini only)

Ions Score: 22 Expect: 1.1e+02

Matches : 8/474 fragment ions using 14 most intense peaks ([help](#))

| #  | Immon.   | a         | a <sup>0</sup> | b         | b <sup>0</sup> | d         | d'        | Seq. | v         | w         | w'        | y         | y*        | y <sup>0</sup> | #  |
|----|----------|-----------|----------------|-----------|----------------|-----------|-----------|------|-----------|-----------|-----------|-----------|-----------|----------------|----|
| 1  | 60.0444  | 60.0444   | 42.0338        | 88.0393   | 70.0287        | 44.0495   |           | S    |           |           |           |           |           |                | 26 |
| 2  | 30.0338  | 117.0659  | 99.0553        | 145.0608  | 127.0502       |           |           | G    |           |           |           | 2745.1985 | 2728.1719 | 2727.1879      | 25 |
| 3  | 136.0757 | 280.1292  | 262.1186       | 308.1241  | 290.1135       |           |           | Y    | 2580.1195 |           |           | 2688.1770 | 2671.1505 | 2670.1664      | 24 |
| 4  | 74.0600  | 381.1769  | 363.1663       | 409.1718  | 391.1612       | 365.1819  | 367.1612  | T    | 2479.0718 | 2492.0922 | 2494.0715 | 2525.1137 | 2508.0871 | 2507.1031      | 23 |
| 5  | 44.0495  | 452.2140  | 434.2034       | 480.2089  | 462.1983       |           |           | A    | 2408.0347 |           |           | 2424.0660 | 2407.0394 | 2406.0554      | 22 |
| 6  | 102.0550 | 581.2566  | 563.2460       | 609.2515  | 591.2409       | 523.2511  |           | E    | 2278.9921 | 2277.9969 |           | 2353.0289 | 2336.0023 | 2335.0183      | 21 |
| 7  | 102.0550 | 710.2992  | 692.2886       | 738.2941  | 720.2835       | 652.2937  |           | E    | 2149.9495 | 2148.9543 |           | 2223.9863 | 2206.9597 | 2205.9757      | 20 |
| 8  | 88.0393  | 825.3261  | 807.3155       | 853.3210  | 835.3105       | 781.3363  |           | D    | 2034.9226 | 2033.9273 |           | 2094.9437 | 2077.9171 | 2076.9331      | 19 |
| 9  | 120.0808 | 972.3945  | 954.3840       | 1000.3894 | 982.3789       |           |           | F    | 1887.8542 |           |           | 1979.9168 | 1962.8902 | 1961.9062      | 18 |
| 10 | 44.0495  | 1043.4316 | 1025.4211      | 1071.4265 | 1053.4160      |           |           | A    | 1816.8170 |           |           | 1832.8483 | 1815.8218 | 1814.8378      | 17 |
| 11 | 74.0600  | 1144.4793 | 1126.4687      | 1172.4742 | 1154.4637      | 1128.4844 | 1130.4637 | T    | 1715.7694 | 1728.7898 | 1730.7690 | 1761.8112 | 1744.7847 | 1743.8007      | 16 |
| 12 | 44.0495  | 1215.5164 | 1197.5059      | 1243.5113 | 1225.5008      |           |           | A    | 1644.7322 |           |           | 1660.7635 | 1643.7370 | 1642.7530      | 15 |
| 13 | 88.0393  | 1330.5434 | 1312.5328      | 1358.5383 | 1340.5277      | 1286.5535 |           | D    | 1529.7053 | 1528.7101 |           | 1589.7264 | 1572.6999 | 1571.7159      | 14 |
| 14 | 44.0495  | 1401.5805 | 1383.5699      | 1429.5754 | 1411.5648      |           |           | A    | 1458.6682 |           |           | 1474.6995 | 1457.6729 | 1456.6889      | 13 |
| 15 | 72.0808  | 1500.6489 | 1482.6383      | 1528.6438 | 1510.6332      | 1486.6332 |           | V    | 1359.5998 | 1372.6202 |           | 1403.6624 | 1386.6358 | 1385.6518      | 12 |
| 16 | 120.0808 | 1647.7173 | 1629.7067      | 1675.7122 | 1657.7017      |           |           | F    | 1212.5314 |           |           | 1304.5940 | 1287.5674 | 1286.5834      | 11 |
| 17 | 88.0393  | 1762.7443 | 1744.7337      | 1790.7392 | 1772.7286      | 1718.7544 |           | D    | 1097.5044 | 1096.5092 |           | 1157.5255 | 1140.4990 | 1139.5150      | 10 |
| 18 | 133.0430 | 1922.7749 | 1904.7643      | 1950.7698 | 1932.7593      | 1833.7814 |           | C    | 937.4738  | 936.4785  |           | 1042.4986 | 1025.4721 | 1024.4880      | 9  |
| 19 | 86.0964  | 2035.8590 | 2017.8484      | 2063.8539 | 2045.8433      | 2007.8277 | 2021.8433 | I    | 824.3897  | 837.4101  | 851.4258  | 882.4680  | 865.4414  | 864.4574       | 8  |



|    |          |           |           |           |           |           |  |  |   |          |          |          |          |          |   |
|----|----------|-----------|-----------|-----------|-----------|-----------|--|--|---|----------|----------|----------|----------|----------|---|
| 20 | 30.0338  | 2092.8804 | 2074.8699 | 2120.8753 | 2102.8648 |           |  |  |   |          |          | 769.3839 | 752.3573 | 751.3733 | 7 |
| 21 | 88.0393  | 2207.9074 | 2189.8968 | 2235.9023 | 2217.8917 | 2163.9175 |  |  | D | 652.3413 | 651.3461 | 712.3624 | 695.3359 | 694.3519 | 6 |
| 22 | 70.0651  | 2304.9601 | 2286.9496 | 2332.9551 | 2314.9445 | 2278.9445 |  |  | P | 555.2885 | 554.2933 | 597.3355 | 580.3089 | 579.3249 | 5 |
| 23 | 70.0651  | 2402.0129 | 2384.0023 | 2430.0078 | 2411.9973 | 2375.9973 |  |  | P | 458.2358 | 457.2405 | 500.2827 | 483.2562 | 482.2722 | 4 |
| 24 | 102.0550 | 2531.0555 | 2513.0449 | 2559.0504 | 2541.0398 | 2473.0500 |  |  | E | 329.1932 | 328.1979 | 403.2300 | 386.2034 | 385.2194 | 3 |
| 25 | 72.0808  | 2630.1239 | 2612.1133 | 2658.1188 | 2640.1083 | 2616.1083 |  |  | V | 230.1248 | 243.1452 | 274.1874 | 257.1608 |          | 2 |
| 26 | 129.1135 |           |           |           |           |           |  |  | R | 74.0237  | 73.0284  | 175.1190 | 158.0924 |          | 1 |

| Seq    | ya       | yb       | Seq    | ya       | yb       | Seq     | ya       | yb       |
|--------|----------|----------|--------|----------|----------|---------|----------|----------|
| GY     | 193.0972 | 221.0921 | GYT    | 294.1448 | 322.1397 | GYTA    | 365.1819 | 393.1769 |
| GYTAE  | 494.2245 | 522.2195 | GYTAE  | 623.2671 | 651.2620 | YT      | 237.1234 | 265.1183 |
| YTA    | 308.1605 | 336.1554 | YTAE   | 437.2031 | 465.1980 | YTAE    | 566.2457 | 594.2406 |
| YTAEE  | 681.2726 | 709.2675 | TA     | 145.0972 | 173.0921 | TAE     | 274.1397 | 302.1347 |
| TAE    | 403.1823 | 431.1773 | TAE    | 518.2093 | 546.2042 | TAEEDF  | 665.2777 | 693.2726 |
| AE     | 173.0921 | 201.0870 | AEE    | 302.1347 | 330.1296 | AEED    | 417.1616 | 445.1565 |
| AEEDF  | 564.2300 | 592.2249 | AEEDFA | 635.2671 | 663.2620 | EE      | 231.0975 | 259.0925 |
| EED    | 346.1245 | 374.1194 | EEDF   | 493.1929 | 521.1878 | EEDFA   | 564.2300 | 592.2249 |
| EEDFAT | 665.2777 | 693.2726 | ED     | 217.0819 | 245.0768 | EDF     | 364.1503 | 392.1452 |
| EDFA   | 435.1874 | 463.1823 | EDFAT  | 536.2351 | 564.2300 | EDFATA  | 607.2722 | 635.2671 |
| DF     | 235.1077 | 263.1026 | DFA    | 306.1448 | 334.1397 | DFAT    | 407.1925 | 435.1874 |
| DFATA  | 478.2296 | 506.2245 | DFATAD | 593.2566 | 621.2515 | DFATADA | 664.2937 | 692.2886 |
| FA     | 191.1179 | 219.1128 | FAT    | 292.1656 | 320.1605 | FATA    | 363.2027 | 391.1976 |
| FATAD  | 478.2296 | 506.2245 | FATADA | 549.2667 | 577.2617 | FATADAV | 648.3352 | 676.3301 |
| AT     | 145.0972 | 173.0921 | ATA    | 216.1343 | 244.1292 | ATAD    | 331.1612 | 359.1561 |
| ATADA  | 402.1983 | 430.1932 | ATADAV | 501.2667 | 529.2617 | ATADAVF | 648.3352 | 676.3301 |
| TA     | 145.0972 | 173.0921 | TAD    | 260.1241 | 288.1190 | TADA    | 331.1612 | 359.1561 |
| TADAV  | 430.2296 | 458.2245 | TADAVF | 577.2980 | 605.2930 | TADAVFD | 692.3250 | 720.3199 |
| AD     | 159.0764 | 187.0713 | ADA    | 230.1135 | 258.1084 | ADAV    | 329.1819 | 357.1769 |
| ADAVF  | 476.2504 | 504.2453 | ADAVFD | 591.2773 | 619.2722 | DA      | 159.0764 | 187.0713 |
| DAV    | 258.1448 | 286.1397 | DAVF   | 405.2132 | 433.2082 | DAVFD   | 520.2402 | 548.2351 |
| DAVFD  | 680.2708 | 708.2658 | AV     | 143.1179 | 171.1128 | AVF     | 290.1863 | 318.1812 |
| AVFD   | 405.2132 | 433.2082 | AVFD   | 565.2439 | 593.2388 | AVFD    | 678.3280 | 706.3229 |
| VF     | 219.1492 | 247.1441 | VFD    | 334.1761 | 362.1710 | VFDC    | 494.2068 | 522.2017 |
| VFDC   | 607.2908 | 635.2858 | VFDCIG | 664.3123 | 692.3072 | FD      | 235.1077 | 263.1026 |
| FDC    | 395.1384 | 423.1333 | FDC    | 508.2224 | 536.2173 | FDCIG   | 565.2439 | 593.2388 |
| FDCIG  | 680.2708 | 708.2658 | DC     | 248.0700 | 276.0649 | DCI     | 361.1540 | 389.1489 |
| DCIG   | 418.1755 | 446.1704 | DCIG   | 533.2024 | 561.1973 | DCIGDP  | 630.2552 | 658.2501 |
| CI     | 246.1271 | 274.1220 | CIG    | 303.1485 | 331.1435 | CIGD    | 418.1755 | 446.1704 |
| CIGDP  | 515.2282 | 543.2232 | CIGDPP | 612.2810 | 640.2759 | IG      | 143.1179 | 171.1128 |
| IGD    | 258.1448 | 286.1397 | IGDP   | 355.1976 | 383.1925 | IGDPP   | 452.2504 | 480.2453 |
| IGDPP  | 581.2930 | 609.2879 | IGDPP  | 680.3614 | 708.3563 | GD      | 145.0608 | 173.0557 |
| GDP    | 242.1135 | 270.1084 | GDPP   | 339.1663 | 367.1612 | GDPPE   | 468.2089 | 496.2038 |
| GDPPE  | 567.2773 | 595.2722 | DP     | 185.0921 | 213.0870 | DPP     | 282.1448 | 310.1397 |
| DPPE   | 411.1874 | 439.1823 | DPPE   | 510.2558 | 538.2508 | PP      | 167.1179 | 195.1128 |
| PPE    | 296.1605 | 324.1554 | PPEV   | 395.2289 | 423.2238 | PE      | 199.1077 | 227.1026 |
| PEV    | 298.1761 | 326.1710 | EV     | 201.1234 | 229.1183 |         |          |          |

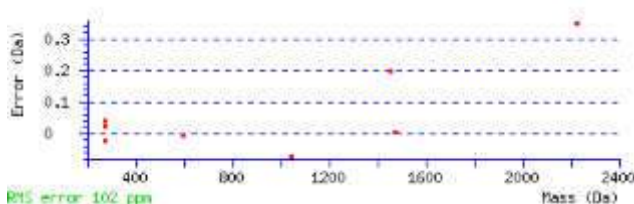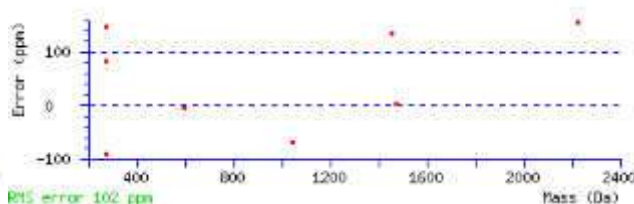



NCBI BLAST search of [SGYTAEEDFATADAVFDCIGDPPEVR](#)  
(Parameters: blastp, nr protein database, expect=20000, no filter, PAM30)  
Other BLAST [web gateways](#)

**All matches to this query**

| Score | Mr(calc)  | Delta   | Sequence                                    |
|-------|-----------|---------|---------------------------------------------|
| 21.7  | 2831.2232 | 0.0598  | <a href="#">SGYTAEEDFATADAVFDCIGDPPEVR</a>  |
| 12.5  | 2831.4388 | -0.1558 | <a href="#">MSFQPLPPGAAADDAVLVOPETRLHR</a>  |
| 12.4  | 2831.4488 | -0.1658 | <a href="#">NGAVVGAQVFDGQEIQLISDQGLVLR</a>  |
| 12.3  | 2831.1181 | 0.1649  | <a href="#">DDYGSSYNYAMDYWGQTSVTVSS</a>     |
| 11.6  | 2831.4084 | -0.1253 | <a href="#">MSTTTASVSTHILDTSVGRPAGDVAVR</a> |
| 11.5  | 2831.2894 | -0.0064 | <a href="#">SMSSAYLEWSSLRASDTAIYYCVR</a>    |
| 10.9  | 2831.2717 | 0.0113  | <a href="#">SFGCMPNAATLGGITPAQWLMEEYR</a>   |
| 10.9  | 2831.2162 | 0.0668  | <a href="#">YAMQEFMILPTGAANFTEAMKMGSE</a>   |
| 10.7  | 2831.4501 | -0.1671 | <a href="#">MSGQLFDVVQNSPLIAVALHNGHGVR</a>  |
| 10.7  | 2831.3990 | -0.1160 | <a href="#">AQANLVVRENYAQVNFYNEISFSR</a>    |

Mascot: <http://www.matrixscience.com/>

# MATRIX SCIENCE Mascot Search Results

## Peptide View **Spot no 37**

### MS/MS Fragmentation of **IFLPEGLLDR**

Found in **gi|19184** in **NCBI**nr, Type I (26 kD) CP29 polypeptide [Solanum lycopersicum]

Match to Query 175: 1171.674124 from(1172.681400,1+) intensity(0.0000) index(12)

Title: Label: E5, Spot\_Id: 219742, Peak\_List\_Id: 225695, MSMS Job\_Run\_Id: 21786, Comment:

Data file C:\Documents and Settings\Administrator\Desktop\farah BHU\spot set plate\Farah-Garima 11May

2013\ppw\_E5\_136842184900.txt

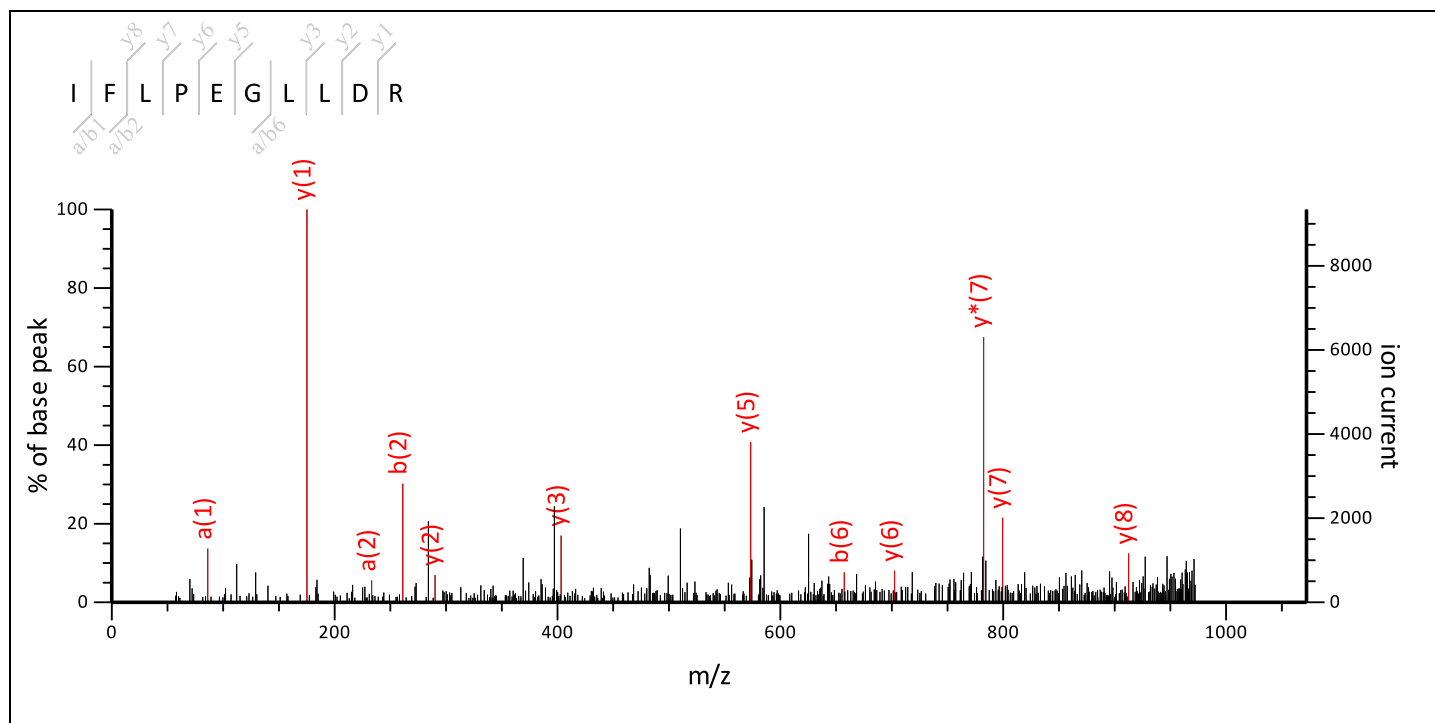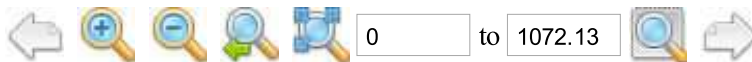

Label all possible matches  Label matches used for scoring

**Monoisotopic mass of neutral peptide Mr(calc):** 1171.6601

**Fixed modifications:** Carbamidomethyl (C) (apply to specified residues or termini only)

**Ions Score:** 35 **Expect:** 0.64

**Matches :** 12/36 fragment ions using 30 most intense peaks ([help](#))

| # | a        | b        | Seq. | y         | y*        | #  |
|---|----------|----------|------|-----------|-----------|----|
| 1 | 86.0964  | 114.0913 | I    |           |           | 10 |
| 2 | 233.1648 | 261.1598 | F    | 1059.5833 | 1042.5568 | 9  |
| 3 | 346.2489 | 374.2438 | L    | 912.5149  | 895.4884  | 8  |
| 4 | 443.3017 | 471.2966 | P    | 799.4308  | 782.4043  | 7  |
| 5 | 572.3443 | 600.3392 | E    | 702.3781  | 685.3515  | 6  |
| 6 | 629.3657 | 657.3606 | G    | 573.3355  | 556.3089  | 5  |
| 7 | 742.4498 | 770.4447 | L    | 516.3140  | 499.2875  | 4  |
| 8 | 855.5339 | 883.5288 | L    | 403.2300  | 386.2034  | 3  |

|    |          |          |   |                 |          |   |
|----|----------|----------|---|-----------------|----------|---|
| 9  | 970.5608 | 998.5557 | D | <b>290.1459</b> | 273.1193 | 2 |
| 10 |          |          | R | <b>175.1190</b> | 158.0924 | 1 |

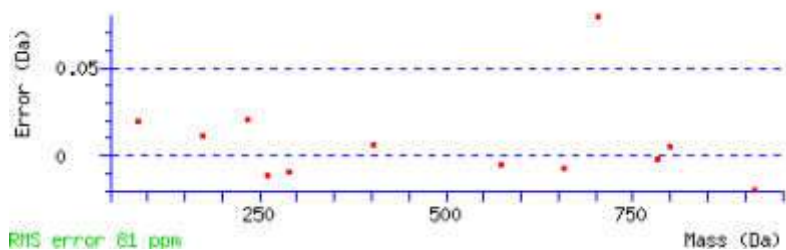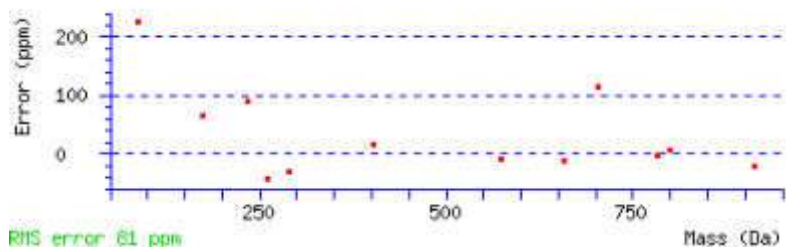

NCBI **BLAST** search of [IFLPEGLLDR](#)

(Parameters: blastp, nr protein database, expect=20000, no filter, PAM30)

Other BLAST [web gateways](#)

#### All matches to this query

| Score | Mr(calc)  | Delta   | Sequence                     |
|-------|-----------|---------|------------------------------|
| 34.7  | 1171.6601 | 0.0140  | <a href="#">IFLPEGLLDR</a>   |
| 15.3  | 1171.6462 | 0.0279  | <a href="#">RSGSKPWAVGK</a>  |
| 12.8  | 1171.6999 | -0.0257 | <a href="#">LMIPTTVILR</a>   |
| 12.7  | 1171.6495 | 0.0246  | <a href="#">IMIGRSLNPR</a>   |
| 11.5  | 1171.5768 | 0.0973  | <a href="#">AATGLQCPAGAR</a> |
| 11.5  | 1171.7216 | -0.0475 | <a href="#">IFLPETVLLK</a>   |
| 11.5  | 1171.6713 | 0.0028  | <a href="#">LHPKPEPLNK</a>   |
| 11.5  | 1171.6859 | -0.0118 | <a href="#">LMLINRAGIR</a>   |
| 11.3  | 1171.6383 | 0.0358  | <a href="#">MEIILNVANR</a>   |
| 11.2  | 1171.5833 | 0.0908  | <a href="#">QNEVEGLIDR</a>   |

Mascot: <http://www.matrixscience.com/>



# Mascot Search Results

## Peptide View **Spot no 37**

### MS/MS Fragmentation of **YQAYELIHAR**

Found in **gi|19184** in **NCBI**nr, Type I (26 kD) CP29 polypeptide [Solanum lycopersicum]

Match to Query 218: 1262.659024 from(1263.666300,1+) intensity(0.0000) index(15)

Title: Label: E5, Spot\_Id: 219742, Peak\_List\_Id: 225693, MSMS Job\_Run\_Id: 21786, Comment:

Data file C:\Documents and Settings\Administrator\Desktop\farah BHU\spot set plate\Farah-Garima 11May 2013\ppw\_E5\_136842184900.txt

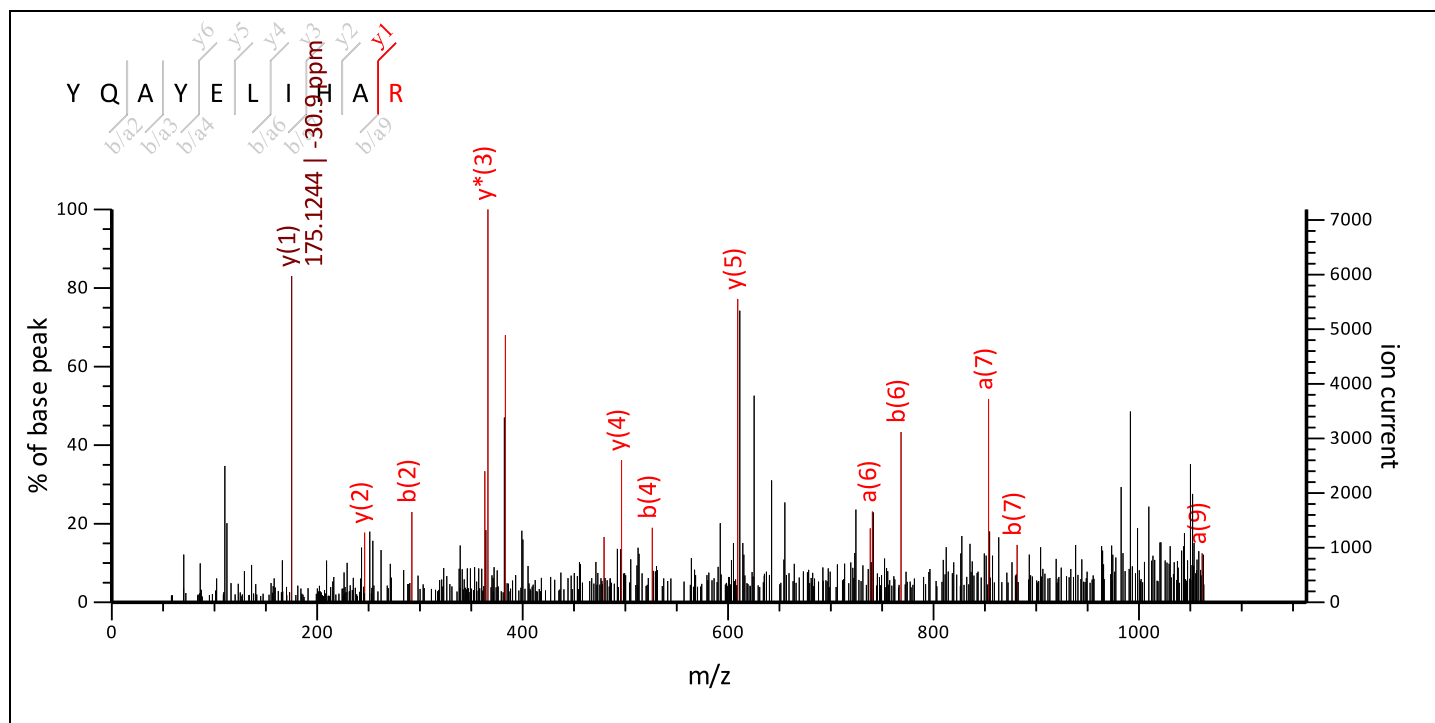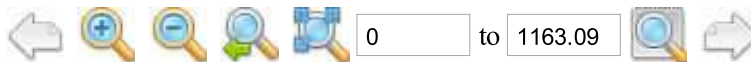

Label all possible matches  Label matches used for scoring

**Monoisotopic mass of neutral peptide Mr(calc):** 1262.6407

**Fixed modifications:** Carbamidomethyl (C) (apply to specified residues or termini only)

**Ions Score:** 23 **Expect:** 11

**Matches :** 16/52 fragment ions using 44 most intense peaks ([help](#))

| # | a               | a*       | b               | b*        | Seq. | y               | y*              | #  |
|---|-----------------|----------|-----------------|-----------|------|-----------------|-----------------|----|
| 1 | 136.0757        |          | 164.0706        |           | Y    |                 |                 | 10 |
| 2 | 264.1343        | 247.1077 | <b>292.1292</b> | 275.1026  | Q    | 1100.5847       | 1083.5582       | 9  |
| 3 | 335.1714        | 318.1448 | <b>363.1663</b> | 346.1397  | A    | 972.5261        | 955.4996        | 8  |
| 4 | 498.2347        | 481.2082 | <b>526.2296</b> | 509.2031  | Y    | 901.4890        | 884.4625        | 7  |
| 5 | 627.2773        | 610.2508 | 655.2722        | 638.2457  | E    | <b>738.4257</b> | 721.3992        | 6  |
| 6 | <b>740.3614</b> | 723.3348 | <b>768.3563</b> | 751.3297  | L    | <b>609.3831</b> | 592.3566        | 5  |
| 7 | <b>853.4454</b> | 836.4189 | <b>881.4403</b> | 864.4138  | I    | <b>496.2990</b> | <b>479.2725</b> | 4  |
| 8 | 990.5043        | 973.4778 | 1018.4993       | 1001.4727 | H    | <b>383.2150</b> | <b>366.1884</b> | 3  |

|    |                  |           |           |           |   |                 |          |   |
|----|------------------|-----------|-----------|-----------|---|-----------------|----------|---|
| 9  | <b>1061.5415</b> | 1044.5149 | 1089.5364 | 1072.5098 | A | <b>246.1561</b> | 229.1295 | 2 |
| 10 |                  |           |           |           | R | <b>175.1190</b> | 158.0924 | 1 |

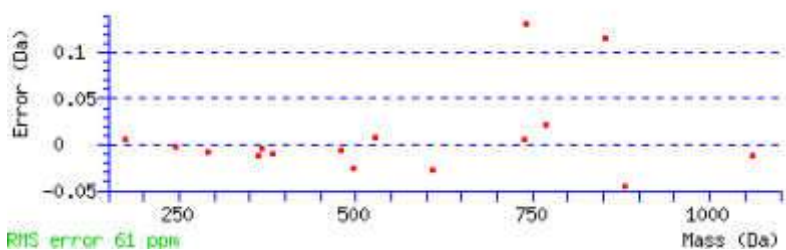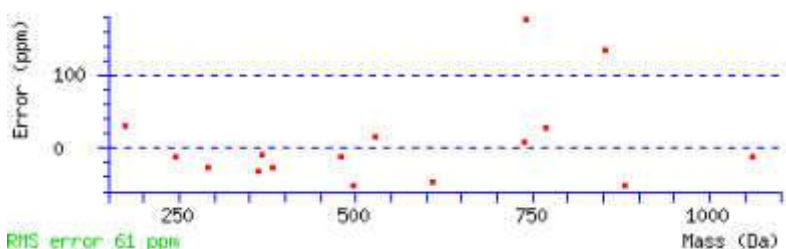

NCBI BLAST search of [YQAYELIHAR](#)

(Parameters: blastp, nr protein database, expect=20000, no filter, PAM30)

Other BLAST [web gateways](#)

#### All matches to this query

| Score | Mr(calc)  | Delta   | Sequence                       |
|-------|-----------|---------|--------------------------------|
| 23.3  | 1262.6407 | 0.0183  | <a href="#">YQAYELIHAR</a>     |
| 19.5  | 1262.6884 | -0.0293 | <a href="#">HQIFELIHAR</a>     |
| 11.1  | 1262.7057 | -0.0466 | <a href="#">VLLTIPMSFSR</a>    |
| 11.1  | 1262.6619 | -0.0029 | <a href="#">LNGLAADISFSR</a>   |
| 10.7  | 1262.6480 | 0.0110  | <a href="#">TGGAPVGVGANHAR</a> |
| 10.0  | 1262.5527 | 0.1063  | <a href="#">HEDGSELFSSR</a>    |
| 9.6   | 1262.7095 | -0.0505 | <a href="#">VEALLNQIHAR</a>    |
| 8.9   | 1262.6731 | -0.0141 | <a href="#">AALRQLDGTYR</a>    |
| 8.4   | 1262.6506 | 0.0084  | <a href="#">APELELYTTAR</a>    |
| 8.2   | 1262.6996 | -0.0406 | <a href="#">RYHPVVTHVR</a>     |

Mascot: <http://www.matrixscience.com/>


**Mascot Search Results**
**Peptide View Spot no 38**
MS/MS Fragmentation of **VIYDRESGR**Found in **gij115473531** in **NCBI nr**, Os07g0631900 [Oryza sativa Japonica Group]

Match to Query 149: 1093.530824 from(1094.538100,1+) intensity(0.0000) index(22)

Title: Label: C5, Spot\_Id: 219740, Peak\_List\_Id: 225626, MSMS Job\_Run\_Id: 21784, Comment:

Data file C:\Documents and Settings\Administrator\Desktop\farah BHU\spot set plate\Farah-Garima 11May 2013\ppw\_C5\_136842183200.txt

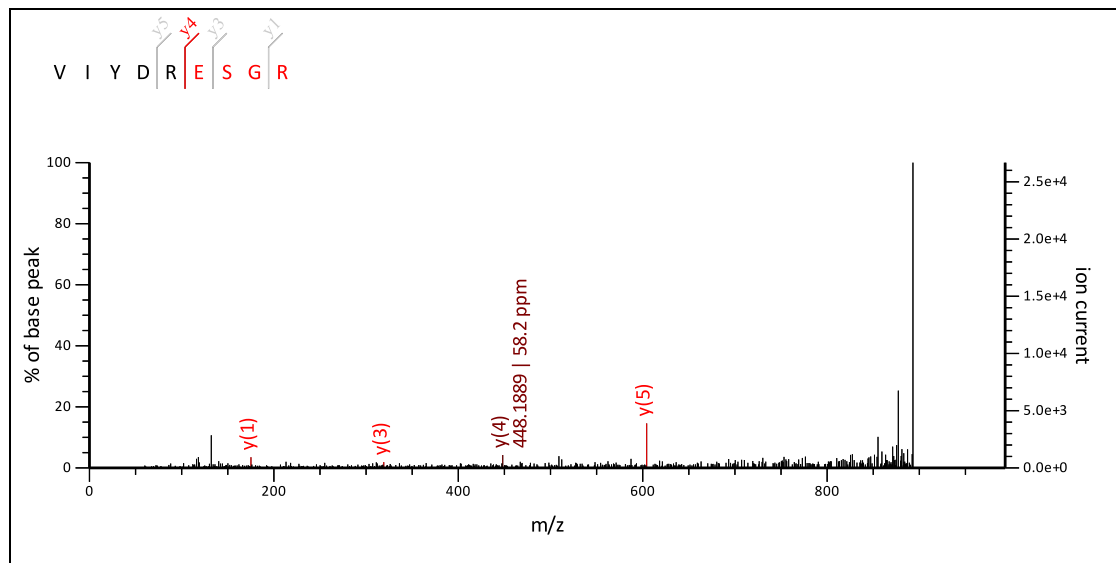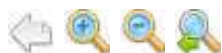

0

to 993.07

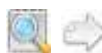Label all possible matches  Label matches used for scoring 

Monoisotopic mass of neutral peptide Mr(calc): 1093.5516

Fixed modifications: Carbamidomethyl (C) (apply to specified residues or termini only)

Ions Score: 13 Expect: 1.4e+02

Matches : 4/123 fragment ions using 9 most intense peaks ([help](#))

| # | Immon.   | a        | a*       | a <sup>0</sup> | b        | b*       | b <sup>0</sup> | d        | d'       | Seq. | v        | w        | w'       | y        | y*       | y <sup>0</sup> | # |
|---|----------|----------|----------|----------------|----------|----------|----------------|----------|----------|------|----------|----------|----------|----------|----------|----------------|---|
| 1 | 72.0808  | 72.0808  |          |                | 100.0757 |          |                | 44.0495  |          | V    |          |          |          |          |          |                | 9 |
| 2 | 86.0964  | 185.1648 |          |                | 213.1598 |          |                | 157.1335 | 171.1492 | I    | 937.4122 | 950.4326 | 964.4483 | 995.4905 | 978.4639 | 977.4799       | 8 |
| 3 | 136.0757 | 348.2282 |          |                | 376.2231 |          |                |          |          | Y    | 774.3489 |          |          | 882.4064 | 865.3799 | 864.3959       | 7 |
| 4 | 88.0393  | 463.2551 |          | 445.2445       | 491.2500 |          | 473.2395       | 419.2653 |          | D    | 659.3220 | 658.3267 |          | 719.3431 | 702.3165 | 701.3325       | 6 |
| 5 | 129.1135 | 619.3562 | 602.3297 | 601.3457       | 647.3511 | 630.3246 | 629.3406       | 534.2922 |          | R    | 503.2209 | 502.2256 |          | 604.3161 | 587.2896 | 586.3056       | 5 |
| 6 | 102.0550 | 748.3988 | 731.3723 | 730.3883       | 776.3937 | 759.3672 | 758.3832       | 690.3933 |          | E    | 374.1783 | 373.1830 |          | 448.2150 | 431.1885 | 430.2045       | 4 |
| 7 | 60.0444  | 835.4308 | 818.4043 | 817.4203       | 863.4258 | 846.3992 | 845.4152       | 819.4359 |          | S    | 287.1462 | 286.1510 |          | 319.1724 | 302.1459 | 301.1619       | 3 |
| 8 | 30.0338  | 892.4523 | 875.4258 | 874.4417       | 920.4472 | 903.4207 | 902.4367       |          |          | G    |          |          |          | 232.1404 | 215.1139 |                | 2 |
| 9 | 129.1135 |          |          |                |          |          |                |          |          | R    | 74.0237  | 73.0284  |          | 175.1190 | 158.0924 |                | 1 |

| Seq   | ya       | yb       | Seq   | ya       | yb       | Seq    | ya       | yb       |
|-------|----------|----------|-------|----------|----------|--------|----------|----------|
| IY    | 249.1598 | 277.1547 | IYD   | 364.1867 | 392.1816 | IYDR   | 520.2878 | 548.2827 |
| IYDRE | 649.3304 | 677.3253 | YD    | 251.1026 | 279.0975 | YDR    | 407.2037 | 435.1987 |
| YDRE  | 536.2463 | 564.2413 | YDRES | 623.2784 | 651.2733 | YDRESG | 680.2998 | 708.2947 |
| DR    | 244.1404 | 272.1353 | DRE   | 373.1830 | 401.1779 | DRES   | 460.2150 | 488.2100 |
| DRESG | 517.2365 | 545.2314 | RE    | 258.1561 | 286.1510 | RES    | 345.1881 | 373.1830 |
| RESG  | 402.2096 | 430.2045 | ES    | 189.0870 | 217.0819 | ESG    | 246.1084 | 274.1034 |
| SG    | 117.0659 | 145.0608 |       |          |          |        |          |          |

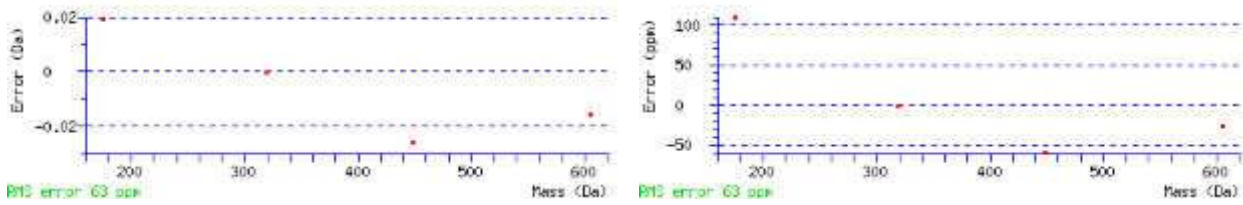

NCBI **BLAST** search of [VIYDRESGR](#)

(Parameters: blastp, nr protein database, expect=20000, no filter, PAM30)

Other BLAST [web gateways](#)

**All matches to this query**

| Score | Mr(calc)  | Delta   | Sequence                    |
|-------|-----------|---------|-----------------------------|
| 13.1  | 1093.5013 | 0.0295  | <a href="#">EHHSRESGR</a>   |
| 13.1  | 1093.5265 | 0.0044  | <a href="#">FOTNRESGR</a>   |
| 13.1  | 1093.5516 | -0.0208 | <a href="#">IVYDRESGR</a>   |
| 13.1  | 1093.5516 | -0.0208 | <a href="#">VIYDRESGR</a>   |
| 7.1   | 1093.4896 | 0.0412  | <a href="#">ISPMMAEGSR</a>  |
| 6.5   | 1093.4975 | 0.0334  | <a href="#">DPYDRAMAR</a>   |
| 6.5   | 1093.5008 | 0.0300  | <a href="#">VMMERDTGR</a>   |
| 5.3   | 1093.5121 | 0.0188  | <a href="#">RSGTGMAMAGR</a> |
| 5.1   | 1093.4822 | 0.0486  | <a href="#">CASKAEESGR</a>  |
| 5.1   | 1093.5074 | 0.0235  | <a href="#">DGTLMLEGSR</a>  |

Mascot: <http://www.matrixscience.com/>




**Mascot Search Results**
**Peptide View** Spot no 38
MS/MS Fragmentation of **VNSGPPPPRDDFAPR**Found in **gi115473531** in **NCBIInr**, Os07g0631900 [Oryza sativa Japonica Group]

Match to Query 298: 1620.784424 from(1621.791700,1+) intensity(0.0000) index(34)

Title: Label: C5, Spot\_Id: 219740, Peak\_List\_Id: 225628, MSMS Job\_Run\_Id: 21784, Comment:

Data file C:\Documents and Settings\Administrator\Desktop\farah BHU\spot set plate\Farah-Garima 11May 2013\ppw\_C5\_136842183200.txt

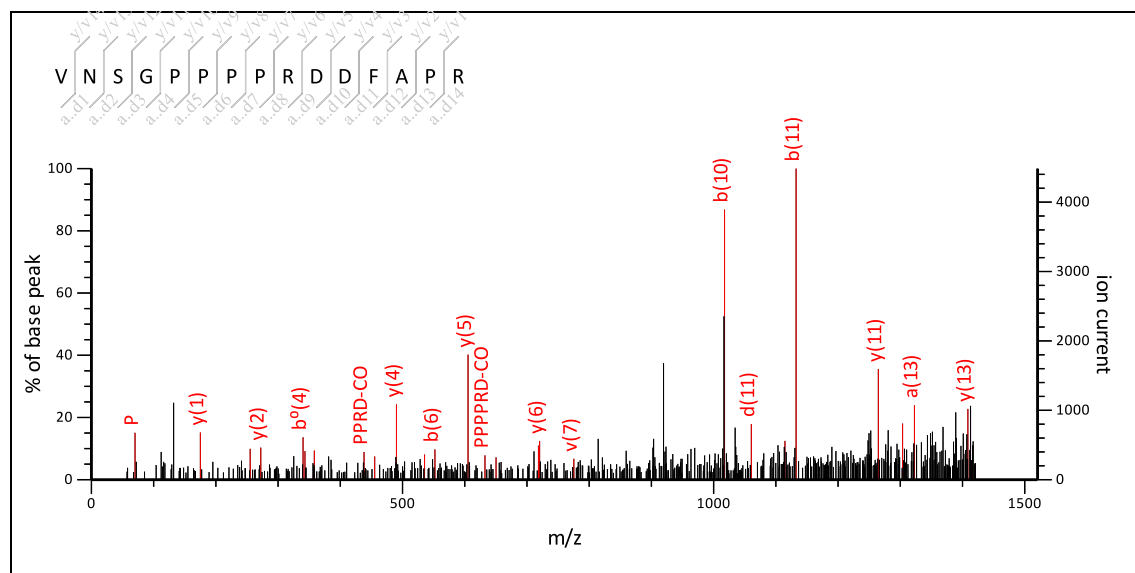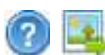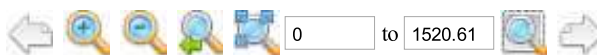Label all possible matches  Label matches used for scoring 

Monoisotopic mass of neutral peptide Mr(calc): 1620.8009

Fixed modifications: Carbamidomethyl (C) (apply to specified residues or termini only)

Ions Score: 46 Expect: 0.05

Matches : 36/267 fragment ions using 42 most intense peaks ([help](#))

| #  | Immon.   | a         | a*        | a <sup>0</sup> | b         | b*        | b <sup>0</sup> | d         | Seq. | v         | w         | y         | y*        | y <sup>0</sup> | #  |
|----|----------|-----------|-----------|----------------|-----------|-----------|----------------|-----------|------|-----------|-----------|-----------|-----------|----------------|----|
| 1  | 72.0808  | 72.0808   |           |                | 100.0757  |           |                | 44.0495   | V    |           |           |           |           |                | 15 |
| 2  | 87.0553  | 186.1237  | 169.0972  |                | 214.1186  | 197.0921  |                | 143.1179  | N    | 1463.7026 | 1462.7074 | 1522.7397 | 1505.7132 | 1504.7292      | 14 |
| 3  | 60.0444  | 273.1557  | 256.1292  | 255.1452       | 301.1506  | 284.1241  | 283.1401       | 257.1608  | S    | 1376.6706 | 1375.6753 | 1408.6968 | 1391.6702 | 1390.6862      | 13 |
| 4  | 30.0338  | 330.1772  | 313.1506  | 312.1666       | 358.1721  | 341.1456  | 340.1615       |           | G    |           |           | 1321.6648 | 1304.6382 | 1303.6542      | 12 |
| 5  | 70.0651  | 427.2300  | 410.2034  | 409.2194       | 455.2249  | 438.1983  | 437.2143       | 401.2143  | P    | 1222.5963 | 1221.6011 | 1264.6433 | 1247.6167 | 1246.6327      | 11 |
| 6  | 70.0651  | 524.2827  | 507.2562  | 506.2722       | 552.2776  | 535.2511  | 534.2671       | 498.2671  | P    | 1125.5436 | 1124.5483 | 1167.5905 | 1150.5640 | 1149.5800      | 10 |
| 7  | 70.0651  | 621.3355  | 604.3089  | 603.3249       | 649.3304  | 632.3039  | 631.3198       | 595.3198  | P    | 1028.4908 | 1027.4956 | 1070.5378 | 1053.5112 | 1052.5272      | 9  |
| 8  | 70.0651  | 718.3883  | 701.3617  | 700.3777       | 746.3832  | 729.3566  | 728.3726       | 692.3726  | P    | 931.4381  | 930.4428  | 973.4850  | 956.4585  | 955.4744       | 8  |
| 9  | 129.1135 | 874.4894  | 857.4628  | 856.4788       | 902.4843  | 885.4577  | 884.4737       | 789.4254  | R    | 775.3369  | 774.3417  | 876.4322  | 859.4057  | 858.4217       | 7  |
| 10 | 88.0393  | 989.5163  | 972.4898  | 971.5057       | 1017.5112 | 1000.4847 | 999.5007       | 945.5265  | D    | 660.3100  | 659.3148  | 720.3311  | 703.3046  | 702.3206       | 6  |
| 11 | 88.0393  | 1104.5432 | 1087.5167 | 1086.5327      | 1132.5382 | 1115.5116 | 1114.5276      | 1060.5534 | D    | 545.2831  | 544.2878  | 605.3042  | 588.2776  | 587.2936       | 5  |
| 12 | 120.0808 | 1251.6117 | 1234.5851 | 1233.6011      | 1279.6066 | 1262.5800 | 1261.5960      |           | F    | 398.2146  |           | 490.2772  | 473.2507  |                | 4  |
| 13 | 44.0495  | 1322.6488 | 1305.6222 | 1304.6382      | 1350.6437 | 1333.6171 | 1332.6331      |           | A    | 327.1775  |           | 343.2088  | 326.1823  |                | 3  |
| 14 | 70.0651  | 1419.7015 | 1402.6750 | 1401.6910      | 1447.6965 | 1430.6699 | 1429.6859      | 1393.6859 | P    | 230.1248  | 229.1295  | 272.1717  | 255.1452  |                | 2  |
| 15 | 129.1135 |           |           |                |           |           |                |           | R    | 74.0237   | 73.0284   | 175.1190  | 158.0924  |                | 1  |

| Seq   | ya       | yb       | Seq    | ya       | yb       | Seq     | ya       | yb       |
|-------|----------|----------|--------|----------|----------|---------|----------|----------|
| NS    | 174.0873 | 202.0822 | NSG    | 231.1088 | 259.1037 | NSGP    | 328.1615 | 356.1565 |
| NSGPP | 425.2143 | 453.2092 | NSGPPP | 522.2671 | 550.2620 | NSGPPPP | 619.3198 | 647.3148 |
| SG    | 117.0659 | 145.0608 | SGP    | 214.1186 | 242.1135 | SGPP    | 311.1714 | 339.1663 |

|        |          |          |        |          |          |         |          |          |
|--------|----------|----------|--------|----------|----------|---------|----------|----------|
| SGPPP  | 408.2241 | 436.2191 | SGPPPP | 505.2769 | 533.2718 | SGPPPPR | 661.3780 | 689.3729 |
| GP     | 127.0866 | 155.0815 | GPP    | 224.1394 | 252.1343 | GPPP    | 321.1921 | 349.1870 |
| GPPPP  | 418.2449 | 446.2398 | GPPPPR | 574.3460 | 602.3409 | GPPPPRD | 689.3729 | 717.3679 |
| PP     | 167.1179 | 195.1128 | PPP    | 264.1707 | 292.1656 | PPPP    | 361.2234 | 389.2183 |
| PPPPR  | 517.3245 | 545.3194 | PPPPRD | 632.3515 | 660.3464 | PP      | 167.1179 | 195.1128 |
| PPP    | 264.1707 | 292.1656 | PPPR   | 420.2718 | 448.2667 | PPPRD   | 535.2987 | 563.2936 |
| PPPRDD | 650.3257 | 678.3206 | PP     | 167.1179 | 195.1128 | PPR     | 323.2190 | 351.2139 |
| PPRD   | 438.2459 | 466.2409 | PPRDD  | 553.2729 | 581.2678 | PR      | 226.1662 | 254.1612 |
| PRD    | 341.1932 | 369.1881 | PRDD   | 456.2201 | 484.2150 | PRDDF   | 603.2885 | 631.2835 |
| PRDDFA | 674.3257 | 702.3206 | RD     | 244.1404 | 272.1353 | RDD     | 359.1674 | 387.1623 |
| RDDF   | 506.2358 | 534.2307 | RDDFA  | 577.2729 | 605.2678 | RDDFAP  | 674.3257 | 702.3206 |
| DD     | 203.0662 | 231.0612 | DDF    | 350.1347 | 378.1296 | DDEFA   | 421.1718 | 449.1667 |
| DDFAP  | 518.2245 | 546.2195 | DF     | 235.1077 | 263.1026 | DFA     | 306.1448 | 334.1397 |
| DFAP   | 403.1976 | 431.1925 | FA     | 191.1179 | 219.1128 | FAP     | 288.1707 | 316.1656 |
| AP     | 141.1022 | 169.0972 |        |          |          |         |          |          |

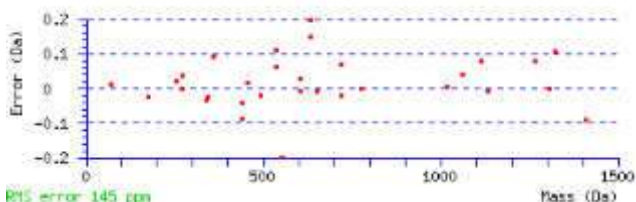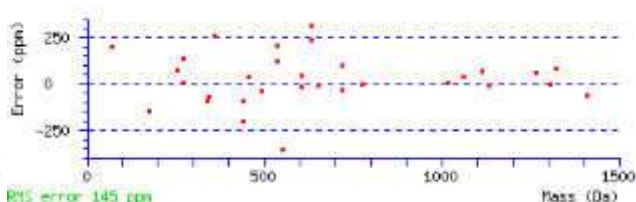

NCBI BLAST search of [VNSGPPPPRDDFAPR](#)  
 (Parameters: blastp, nr protein database, expect=20000, no filter, PAM30)  
 Other BLAST [web gateways](#)

All matches to this query

| Score | Mr(calc)  | Delta   | Sequence                         |
|-------|-----------|---------|----------------------------------|
| 45.7  | 1620.8009 | -0.0164 | <a href="#">VNSGPPPPRDDFAPR</a>  |
| 16.0  | 1620.7777 | 0.0067  | <a href="#">SKDMIQNSLDESVR</a>   |
| 13.9  | 1620.6912 | 0.0932  | <a href="#">MPSSSDLYNRTFGM</a>   |
| 13.7  | 1620.7858 | -0.0013 | <a href="#">MLLFOPEWSDDLK</a>    |
| 13.6  | 1620.6329 | 0.1516  | <a href="#">SSFDFEGENDDDAER</a>  |
| 12.9  | 1620.8141 | -0.0297 | <a href="#">SAIMTTANNLDNTKK</a>  |
| 12.9  | 1620.8909 | -0.1065 | <a href="#">SSSIVVMKAAAAPVFK</a> |
| 10.9  | 1620.7665 | 0.0179  | <a href="#">MEVVVLSDSGDIDSR</a>  |
| 10.7  | 1620.8042 | -0.0198 | <a href="#">FPCSLLSNGRDSIR</a>   |
| 10.4  | 1620.7678 | 0.0166  | <a href="#">AGDAASARAVFDAMPR</a> |

Mascot: <http://www.matrixscience.com/>



# Mascot Search Results

## Peptide View **Spot no 39**

MS/MS Fragmentation of **VVDLAHLVASK**

Found in **gi|115450493** in **NCBI**nr, Os03g0129300 [Oryza sativa Japonica Group]

Match to Query 168: 1150.728824 from(1151.736100,1+) intensity(0.0000) index(15)

Title: Label: H12, Spot\_Id: 219857, Peak\_List\_Id: 227353, MSMS Job\_Run\_Id: 21959, Comment:

Data file C:\Documents and Settings\Administrator\Desktop\Farah-Garima 11May 2013\ppw\_H12\_136868235200.txt

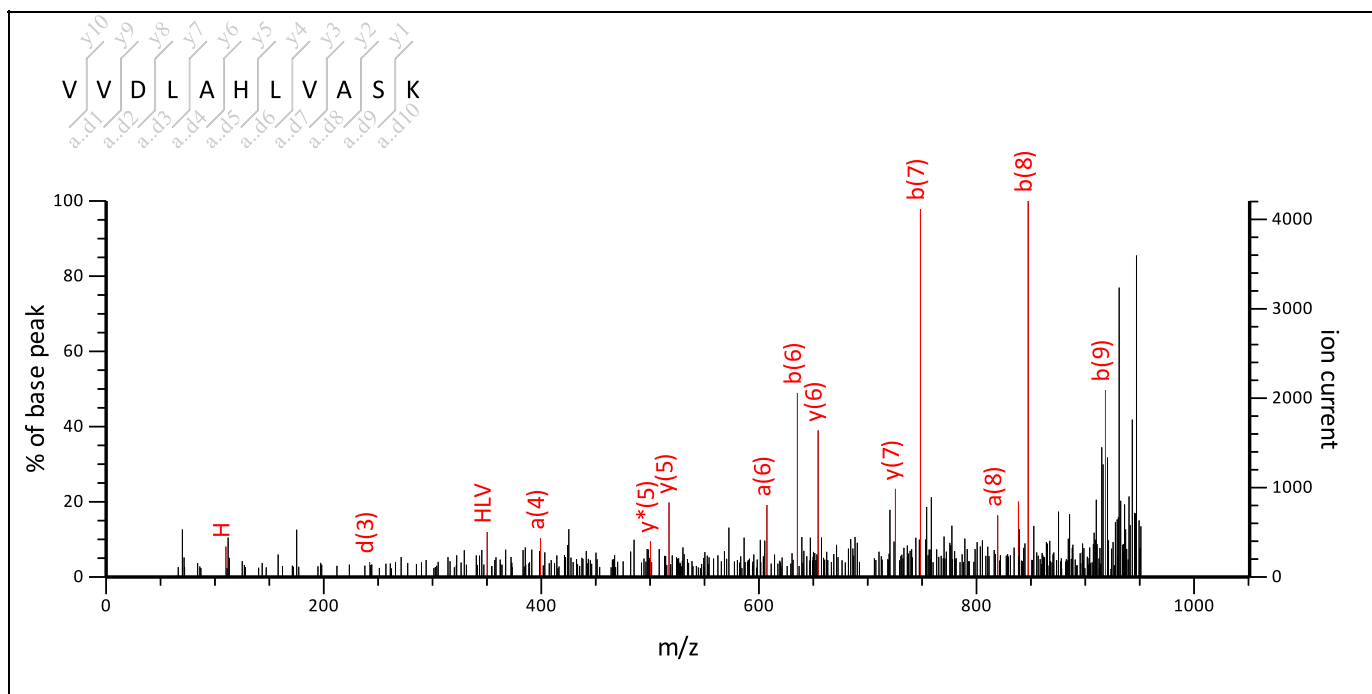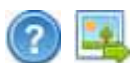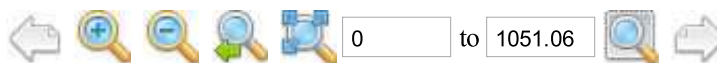

Label all possible matches  Label matches used for scoring

**Monoisotopic mass of neutral peptide Mr(calc):** 1150.6710

**Fixed modifications:** Carbamidomethyl (C) (apply to specified residues or termini only)

**Ions Score:** 27 **Expect:** 25

**Matches:** 16/163 fragment ions using 27 most intense peaks ([help](#))

| #  | Immon.   | a        | a <sup>0</sup> | b         | b <sup>0</sup> | d        | Seq. | v         | w         | y         | y*        | y <sup>0</sup> | #  |
|----|----------|----------|----------------|-----------|----------------|----------|------|-----------|-----------|-----------|-----------|----------------|----|
| 1  | 72.0808  | 72.0808  |                | 100.0757  |                | 44.0495  | V    |           |           |           |           |                | 11 |
| 2  | 72.0808  | 171.1492 |                | 199.1441  |                | 157.1335 | V    | 1008.5473 | 1021.5677 | 1052.6099 | 1035.5833 | 1034.5993      | 10 |
| 3  | 88.0393  | 286.1761 | 268.1656       | 314.1710  | 296.1605       | 242.1863 | D    | 893.5203  | 892.5251  | 953.5415  | 936.5149  | 935.5309       | 9  |
| 4  | 86.0964  | 399.2602 | 381.2496       | 427.2551  | 409.2445       | 357.2132 | L    | 780.4363  | 779.4410  | 838.5145  | 821.4880  | 820.5039       | 8  |
| 5  | 44.0495  | 470.2973 | 452.2867       | 498.2922  | 480.2817       |          | A    | 709.3991  |           | 725.4304  | 708.4039  | 707.4199       | 7  |
| 6  | 110.0713 | 607.3562 | 589.3457       | 635.3511  | 617.3406       |          | H    | 572.3402  |           | 654.3933  | 637.3668  | 636.3828       | 6  |
| 7  | 86.0964  | 720.4403 | 702.4297       | 748.4352  | 730.4246       | 678.3933 | L    | 459.2562  | 458.2609  | 517.3344  | 500.3079  | 499.3239       | 5  |
| 8  | 72.0808  | 819.5087 | 801.4981       | 847.5036  | 829.4930       | 805.4930 | V    | 360.1878  | 373.2082  | 404.2504  | 387.2238  | 386.2398       | 4  |
| 9  | 44.0495  | 890.5458 | 872.5352       | 918.5407  | 900.5302       |          | A    | 289.1506  |           | 305.1819  | 288.1554  | 287.1714       | 3  |
| 10 | 60.0444  | 977.5778 | 959.5673       | 1005.5728 | 987.5622       | 961.5829 | S    | 202.1186  | 201.1234  | 234.1448  | 217.1183  | 216.1343       | 2  |

|    |          |  |  |  |  |   |         |         |          |          |  |   |
|----|----------|--|--|--|--|---|---------|---------|----------|----------|--|---|
| 11 | 101.1073 |  |  |  |  | K | 74.0237 | 73.0284 | 147.1128 | 130.0863 |  | 1 |
|----|----------|--|--|--|--|---|---------|---------|----------|----------|--|---|

| Seq    | ya       | yb       | Seq     | ya       | yb       | Seq   | ya       | yb       |
|--------|----------|----------|---------|----------|----------|-------|----------|----------|
| VD     | 187.1077 | 215.1026 | VDL     | 300.1918 | 328.1867 | VDLA  | 371.2289 | 399.2238 |
| VDLAH  | 508.2878 | 536.2827 | VDLAHL  | 621.3719 | 649.3668 | DL    | 201.1234 | 229.1183 |
| DLA    | 272.1605 | 300.1554 | DLAH    | 409.2194 | 437.2143 | DLAHL | 522.3035 | 550.2984 |
| DLAHLV | 621.3719 | 649.3668 | DLAHLVA | 692.4090 | 720.4039 | LA    | 157.1335 | 185.1285 |
| LAH    | 294.1925 | 322.1874 | LAHL    | 407.2765 | 435.2714 | LAHLV | 506.3449 | 534.3398 |
| LAHLVA | 577.3820 | 605.3770 | LAHLVAS | 664.4141 | 692.4090 | AH    | 181.1084 | 209.1033 |
| AHL    | 294.1925 | 322.1874 | AHLV    | 393.2609 | 421.2558 | AHLVA | 464.2980 | 492.2929 |
| AHLVAS | 551.3300 | 579.3249 | HL      | 223.1553 | 251.1503 | HLV   | 322.2238 | 350.2187 |
| HLVA   | 393.2609 | 421.2558 | HLVAS   | 480.2929 | 508.2878 | LV    | 185.1648 | 213.1598 |
| LVA    | 256.2020 | 284.1969 | LVAS    | 343.2340 | 371.2289 | VA    | 143.1179 | 171.1128 |
| VAS    | 230.1499 | 258.1448 | AS      | 131.0815 | 159.0764 |       |          |          |

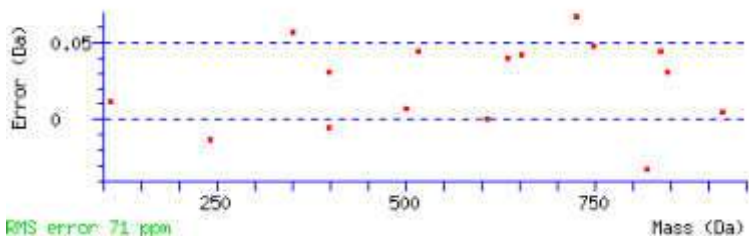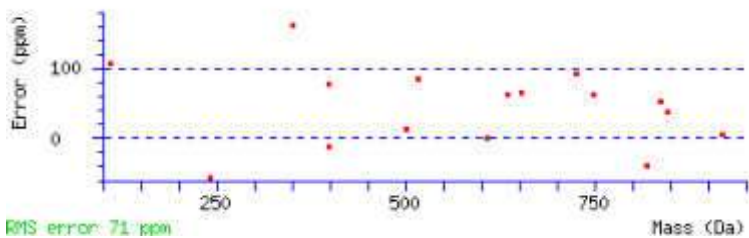

NCBI BLAST search of [VVDLAHLVASK](#)

(Parameters: blastp, nr protein database, expect=20000, no filter, PAM30)

Other BLAST [web gateways](#)

#### All matches to this query

| Score | Mr(calc)  | Delta  | Sequence                     |
|-------|-----------|--------|------------------------------|
| 26.6  | 1150.6710 | 0.0578 | <a href="#">VVDLAHLVASK</a>  |
| 22.1  | 1150.6194 | 0.1095 | <a href="#">IKSTSSSGAVSK</a> |
| 21.4  | 1150.6359 | 0.0929 | <a href="#">HEHLLPLHR</a>    |
| 21.4  | 1150.6458 | 0.0830 | <a href="#">SNTTIPILHR</a>   |
| 21.4  | 1150.6458 | 0.0830 | <a href="#">STQSLPLLHR</a>   |
| 20.0  | 1150.6169 | 0.1120 | <a href="#">GCSVLFILR</a>    |
| 20.0  | 1150.6169 | 0.1120 | <a href="#">GCSVLFSLR</a>    |
| 18.6  | 1150.6710 | 0.0578 | <a href="#">ELAAIHVLASK</a>  |
| 15.3  | 1150.6207 | 0.1082 | <a href="#">AEIIAHRDAR</a>   |
| 14.6  | 1150.6532 | 0.0756 | <a href="#">GVHMLPLAVSK</a>  |

Mascot: <http://www.matrixscience.com/>



**MATRIX SCIENCE Mascot Search Results**

**Peptide View Spot no 39**

MS/MS Fragmentation of **TGITADDVNAAFR**

Found in **gi|115450493** in **NCBItr**, Os03g0129300 [Oryza sativa Japonica Group]

Match to Query 273: 1349.752224 from(1350.759500,1+) intensity(0.0000) index(24)

Title: Label: H12, Spot\_Id: 219857, Peak\_List\_Id: 227347, MSMS Job\_Run\_Id: 21959, Comment:

Data file C:\Documents and Settings\Administrator\Desktop\Farah-Garima 11May 2013\ppw\_H12\_136868235200.txt

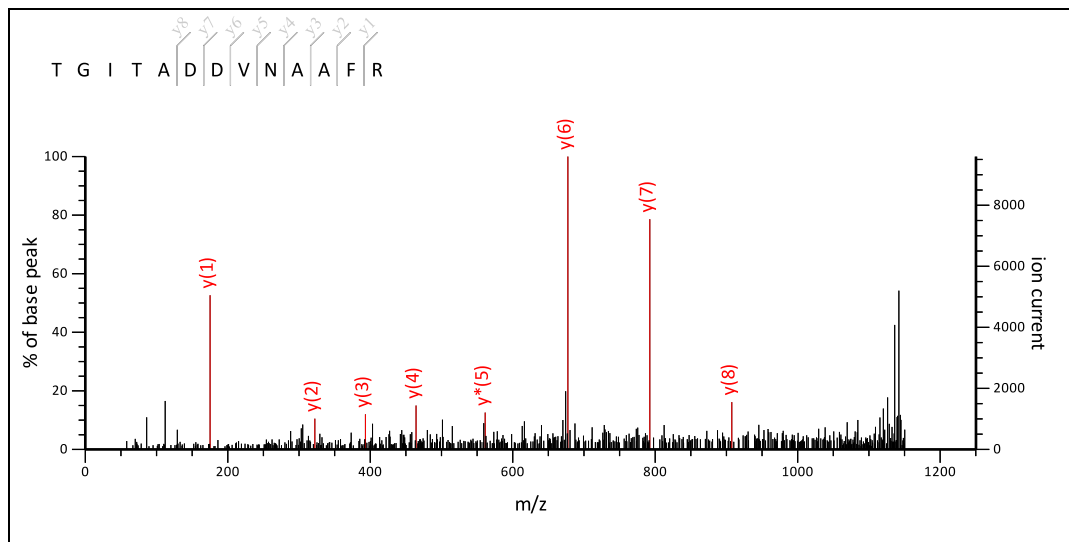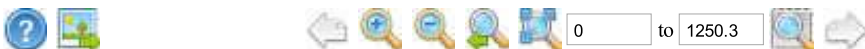

Label all possible matches  Label matches used for scoring

Monoisotopic mass of neutral peptide Mr(calc): 1349.6575

Fixed modifications: Carbamidomethyl (C) (apply to specified residues or termini only)

Ions Score: 55 Expect: 0.092

Matches : 8/214 fragment ions using 11 most intense peaks ([help](#))

| #  | Immon.   | a         | a*        | a <sup>0</sup> | b         | b*        | b <sup>0</sup> | d        | d'       | Seq. | v         | w         | w'        | y         | y*        |
|----|----------|-----------|-----------|----------------|-----------|-----------|----------------|----------|----------|------|-----------|-----------|-----------|-----------|-----------|
| 1  | 74.0600  | 74.0600   |           | 56.0495        | 102.0550  |           | 84.0444        | 44.0495  |          | T    |           |           |           |           |           |
| 2  | 30.0338  | 131.0815  |           | 113.0709       | 159.0764  |           | 141.0659       |          |          | G    |           |           |           | 1249.6171 | 1232.5906 |
| 3  | 86.0964  | 244.1656  |           | 226.1550       | 272.1605  |           | 254.1499       | 216.1343 | 230.1499 | I    | 1134.5174 | 1147.5378 | 1161.5535 | 1192.5957 | 1175.5691 |
| 4  | 74.0600  | 345.2132  |           | 327.2027       | 373.2082  |           | 355.1976       | 329.2183 | 331.1976 | T    | 1033.4697 | 1046.4902 | 1048.4694 | 1079.5116 | 1062.4851 |
| 5  | 44.0495  | 416.2504  |           | 398.2398       | 444.2453  |           | 426.2347       |          |          | A    | 962.4326  |           |           | 978.4639  | 961.4374  |
| 6  | 88.0393  | 531.2773  |           | 513.2667       | 559.2722  |           | 541.2617       | 487.2875 |          | D    | 847.4057  | 846.4104  |           | 907.4268  | 890.4003  |
| 7  | 88.0393  | 646.3042  |           | 628.2937       | 674.2992  |           | 656.2886       | 602.3144 |          | D    | 732.3787  | 731.3835  |           | 792.3999  | 775.3733  |
| 8  | 72.0808  | 745.3727  |           | 727.3621       | 773.3676  |           | 755.3570       | 731.3570 |          | V    | 633.3103  | 646.3307  |           | 677.3729  | 660.3464  |
| 9  | 87.0553  | 859.4156  | 842.3890  | 841.4050       | 887.4105  | 870.3840  | 869.3999       | 816.4098 |          | N    | 519.2674  | 518.2722  |           | 578.3045  | 561.2780  |
| 10 | 44.0495  | 930.4527  | 913.4262  | 912.4421       | 958.4476  | 941.4211  | 940.4371       |          |          | A    | 448.2303  |           |           | 464.2616  | 447.2350  |
| 11 | 44.0495  | 1001.4898 | 984.4633  | 983.4793       | 1029.4847 | 1012.4582 | 1011.4742      |          |          | A    | 377.1932  |           |           | 393.2245  | 376.1979  |
| 12 | 120.0808 | 1148.5582 | 1131.5317 | 1130.5477      | 1176.5531 | 1159.5266 | 1158.5426      |          |          | F    | 230.1248  |           |           | 322.1874  | 305.1608  |
| 13 | 129.1135 |           |           |                |           |           |                |          |          | R    | 74.0237   | 73.0284   |           | 175.1190  | 158.0924  |

| Seq    | ya       | yb       | Seq     | ya       | yb       | Seq     | ya       | yb       |
|--------|----------|----------|---------|----------|----------|---------|----------|----------|
| GI     | 143.1179 | 171.1128 | GIT     | 244.1656 | 272.1605 | GITA    | 315.2027 | 343.1976 |
| GITAD  | 430.2296 | 458.2245 | GITADD  | 545.2566 | 573.2515 | GITADDV | 644.3250 | 672.3199 |
| IT     | 187.1441 | 215.1390 | ITA     | 258.1812 | 286.1761 | ITAD    | 373.2082 | 401.2031 |
| ITADD  | 488.2351 | 516.2300 | ITADDV  | 587.3035 | 615.2984 | TA      | 145.0972 | 173.0921 |
| TAD    | 260.1241 | 288.1190 | TADD    | 375.1510 | 403.1460 | TADDV   | 474.2195 | 502.2144 |
| TADDVN | 588.2624 | 616.2573 | TADDVNA | 659.2995 | 687.2944 | AD      | 159.0764 | 187.0713 |
| ADD    | 274.1034 | 302.0983 | ADDV    | 373.1718 | 401.1667 | ADDVN   | 487.2147 | 515.2096 |
| ADDVNA | 558.2518 | 586.2467 | ADDVNA  | 629.2889 | 657.2838 | DD      | 203.0662 | 231.0612 |

|               |          |          |              |          |          |               |          |          |
|---------------|----------|----------|--------------|----------|----------|---------------|----------|----------|
| <b>DDV</b>    | 302.1347 | 330.1296 | <b>DDVN</b>  | 416.1776 | 444.1725 | <b>DDVNA</b>  | 487.2147 | 515.2096 |
| <b>DDVNAA</b> | 558.2518 | 586.2467 | <b>DV</b>    | 187.1077 | 215.1026 | <b>DVN</b>    | 301.1506 | 329.1456 |
| <b>DVNA</b>   | 372.1878 | 400.1827 | <b>DVNAA</b> | 443.2249 | 471.2198 | <b>DVNAAF</b> | 590.2933 | 618.2882 |
| <b>VN</b>     | 186.1237 | 214.1186 | <b>VNA</b>   | 257.1608 | 285.1557 | <b>VNAA</b>   | 328.1979 | 356.1928 |
| <b>VNAAF</b>  | 475.2663 | 503.2613 | <b>NA</b>    | 158.0924 | 186.0873 | <b>NAA</b>    | 229.1295 | 257.1244 |
| <b>NAAF</b>   | 376.1979 | 404.1928 | <b>AA</b>    | 115.0866 | 143.0815 | <b>AAF</b>    | 262.1550 | 290.1499 |
| <b>AF</b>     | 191.1179 | 219.1128 |              |          |          |               |          |          |

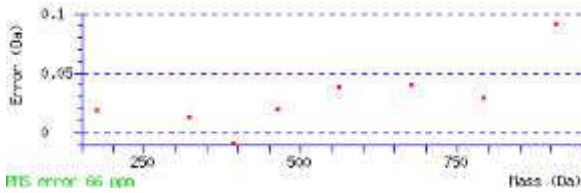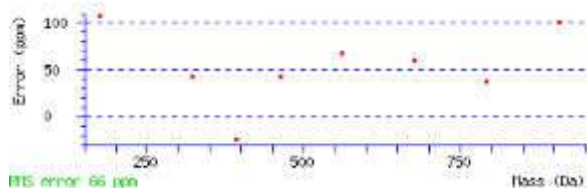

NCBI **BLAST** search of [TGITADDVNAAFR](#)

(Parameters: blastp, nr protein database, expect=20000, no filter, PAM30)

Other BLAST [web gateways](#)

#### All matches to this query

| Score | Mr(calc)  | Delta  | Sequence                      |
|-------|-----------|--------|-------------------------------|
| 55.4  | 1349.6575 | 0.0947 | <a href="#">TGITADDVNAAFR</a> |
| 33.6  | 1349.6907 | 0.0615 | <a href="#">RVGMLAATSAAMR</a> |
| 30.5  | 1349.6874 | 0.0648 | <a href="#">QAIMDGLSRGFR</a>  |
| 30.3  | 1349.6575 | 0.0947 | <a href="#">SDEAQAVTDAGIR</a> |
| 28.1  | 1349.6687 | 0.0835 | <a href="#">DYNPSATARLR</a>   |
| 27.2  | 1349.6323 | 0.1199 | <a href="#">DAYAAAAADARER</a> |
| 27.2  | 1349.6324 | 0.1199 | <a href="#">SEADRDGLNAFR</a>  |
| 26.7  | 1349.6688 | 0.0835 | <a href="#">IENDGSVRSAFR</a>  |
| 26.4  | 1349.6952 | 0.0570 | <a href="#">EFSRNRPAEFR</a>   |
| 26.4  | 1349.7204 | 0.0318 | <a href="#">ERGALFVNAAFR</a>  |

Mascot: <http://www.matrixscience.com/>



**MATRIX SCIENCE Mascot Search Results**

**Peptide View Spot no 39**

MS/MS Fragmentation of **TGITADDVNAAFRK**

Found in **gi|115450493** in **NCBItr**, Os03g0129300 [Oryza sativa Japonica Group]

Match to Query 329: 1477.854824 from(1478.862100,1+) intensity(0.0000) index(27)

Title: Label: H12, Spot\_Id: 219857, Peak\_List\_Id: 227345, MSMS Job\_Run\_Id: 21959, Comment:

Data file C:\Documents and Settings\Administrator\Desktop\Farah-Garima 11May 2013\ppw\_H12\_136868235200.txt

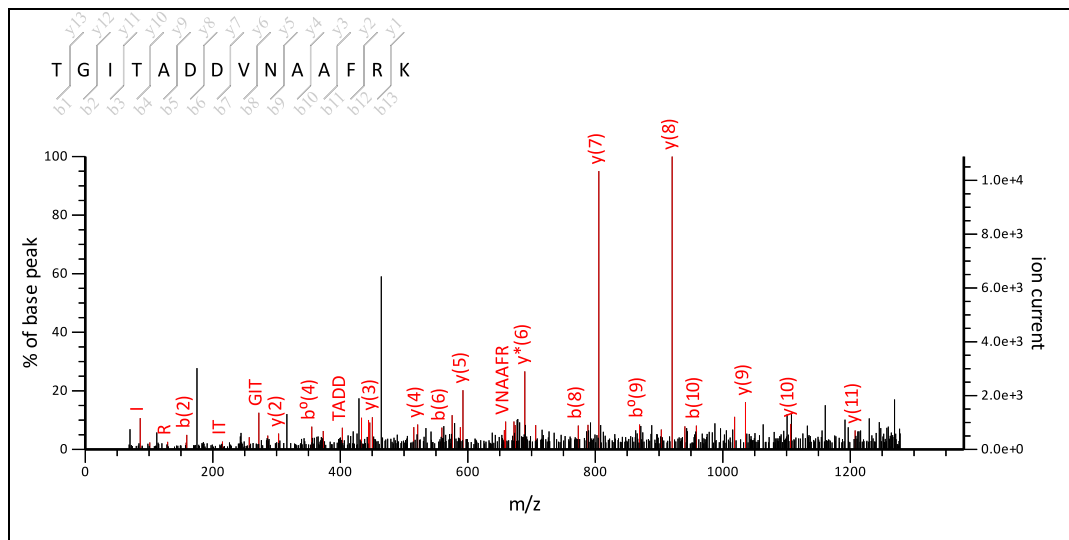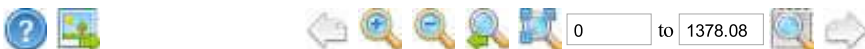

Label all possible matches  Label matches used for scoring

Monoisotopic mass of neutral peptide Mr(calc): 1477.7525

Fixed modifications: Carbamidomethyl (C) (apply to specified residues or termini only)

Ions Score: 42 Expect: 1.5

Matches : 53/236 fragment ions using 104 most intense peaks [\(help\)](#)

| #  | Immon.   | a         | a*        | a <sup>0</sup> | b         | b*        | b <sup>0</sup> | d         | d'       | Seq. | v         | w         | w'        | y         | y*        |
|----|----------|-----------|-----------|----------------|-----------|-----------|----------------|-----------|----------|------|-----------|-----------|-----------|-----------|-----------|
| 1  | 74.0600  | 74.0600   |           | 56.0495        | 102.0550  |           | 84.0444        | 44.0495   |          | T    |           |           |           |           |           |
| 2  | 30.0338  | 131.0815  |           | 113.0709       | 159.0764  |           | 141.0659       |           |          | G    |           |           |           | 1377.7121 | 1360.6856 |
| 3  | 86.0964  | 244.1656  |           | 226.1550       | 272.1605  |           | 254.1499       | 216.1343  | 230.1499 | I    | 1262.6124 | 1275.6328 | 1289.6484 | 1320.6906 | 1303.6641 |
| 4  | 74.0600  | 345.2132  |           | 327.2027       | 373.2082  |           | 355.1976       | 329.2183  | 331.1976 | T    | 1161.5647 | 1174.5851 | 1176.5644 | 1207.6066 | 1190.5800 |
| 5  | 44.0495  | 416.2504  |           | 398.2398       | 444.2453  |           | 426.2347       |           |          | A    | 1090.5276 |           |           | 1106.5589 | 1089.5323 |
| 6  | 88.0393  | 531.2773  |           | 513.2667       | 559.2722  |           | 541.2617       | 487.2875  |          | D    | 975.5007  | 974.5054  |           | 1035.5218 | 1018.4952 |
| 7  | 88.0393  | 646.3042  |           | 628.2937       | 674.2992  |           | 656.2886       | 602.3144  |          | D    | 860.4737  | 859.4785  |           | 920.4948  | 903.4683  |
| 8  | 72.0808  | 745.3727  |           | 727.3621       | 773.3676  |           | 755.3570       | 731.3570  |          | V    | 761.4053  | 774.4257  |           | 805.4679  | 788.4413  |
| 9  | 87.0553  | 859.4156  | 842.3890  | 841.4050       | 887.4105  | 870.3840  | 869.3999       | 816.4098  |          | N    | 647.3624  | 646.3671  |           | 706.3995  | 689.3729  |
| 10 | 44.0495  | 930.4527  | 913.4262  | 912.4421       | 958.4476  | 941.4211  | 940.4371       |           |          | A    | 576.3253  |           |           | 592.3566  | 575.3300  |
| 11 | 44.0495  | 1001.4898 | 984.4633  | 983.4793       | 1029.4847 | 1012.4582 | 1011.4742      |           |          | A    | 505.2881  |           |           | 521.3194  | 504.2929  |
| 12 | 120.0808 | 1148.5582 | 1131.5317 | 1130.5477      | 1176.5531 | 1159.5266 | 1158.5426      |           |          | F    | 358.2197  |           |           | 450.2823  | 433.2558  |
| 13 | 129.1135 | 1304.6593 | 1287.6328 | 1286.6488      | 1332.6543 | 1315.6277 | 1314.6437      | 1219.5953 |          | R    | 202.1186  | 201.1234  |           | 303.2139  | 286.1874  |
| 14 | 101.1073 |           |           |                |           |           |                |           |          | K    | 74.0237   | 73.0284   |           | 147.1128  | 130.0863  |

| Seq    | ya       | yb       | Seq     | ya       | yb       | Seq     | ya       | yb       |
|--------|----------|----------|---------|----------|----------|---------|----------|----------|
| GI     | 143.1179 | 171.1128 | GIT     | 244.1656 | 272.1605 | GITA    | 315.2027 | 343.1976 |
| GITAD  | 430.2296 | 458.2245 | GITADD  | 545.2566 | 573.2515 | GITADDV | 644.3250 | 672.3199 |
| IT     | 187.1441 | 215.1390 | ITA     | 258.1812 | 286.1761 | ITAD    | 373.2082 | 401.2031 |
| ITADD  | 488.2351 | 516.2300 | ITADDV  | 587.3035 | 615.2984 | TA      | 145.0972 | 173.0921 |
| TAD    | 260.1241 | 288.1190 | TADD    | 375.1510 | 403.1460 | TADDV   | 474.2195 | 502.2144 |
| TADDVN | 588.2624 | 616.2573 | TADDVNA | 659.2995 | 687.2944 | AD      | 159.0764 | 187.0713 |
| ADD    | 274.1034 | 302.0983 | ADDV    | 373.1718 | 401.1667 | ADDVN   | 487.2147 | 515.2096 |

|               |          |                 |                |                 |                 |               |                 |                 |
|---------------|----------|-----------------|----------------|-----------------|-----------------|---------------|-----------------|-----------------|
| <b>ADDVNA</b> | 558.2518 | 586.2467        | <b>ADDVNAA</b> | 629.2889        | <b>657.2838</b> | <b>DD</b>     | 203.0662        | 231.0612        |
| <b>DDV</b>    | 302.1347 | 330.1296        | <b>DDVN</b>    | 416.1776        | <b>444.1725</b> | <b>DDVNA</b>  | 487.2147        | <b>515.2096</b> |
| <b>DDVNAA</b> | 558.2518 | 586.2467        | <b>DV</b>      | 187.1077        | <b>215.1026</b> | <b>DVN</b>    | 301.1506        | 329.1456        |
| <b>DVNA</b>   | 372.1878 | 400.1827        | <b>DVNAA</b>   | 443.2249        | 471.2198        | <b>DVNAAF</b> | 590.2933        | 618.2882        |
| <b>VN</b>     | 186.1237 | 214.1186        | <b>VNA</b>     | <b>257.1608</b> | 285.1557        | <b>VNAA</b>   | 328.1979        | 356.1928        |
| <b>VNAAF</b>  | 475.2663 | 503.2613        | <b>VNAAFR</b>  | 631.3675        | <b>659.3624</b> | <b>NA</b>     | <b>158.0924</b> | 186.0873        |
| <b>NAA</b>    | 229.1295 | <b>257.1244</b> | <b>NAAF</b>    | 376.1979        | 404.1928        | <b>NAAFR</b>  | 532.2990        | 560.2940        |
| <b>AA</b>     | 115.0866 | 143.0815        | <b>AAF</b>     | 262.1550        | 290.1499        | <b>AAFR</b>   | 418.2561        | <b>446.2510</b> |
| <b>AF</b>     | 191.1179 | 219.1128        | <b>AFR</b>     | 347.2190        | 375.2139        | <b>FR</b>     | 276.1819        | 304.1768        |

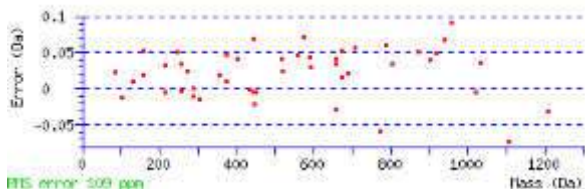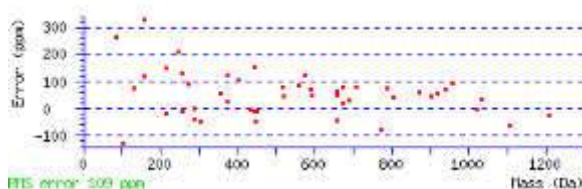

NCBI BLAST search of [TGITADDVNAAF<sup>R</sup>K](#)

(Parameters: blastp, nr protein database, expect=20000, no filter, PAM30)

Other BLAST [web gateways](#)

#### All matches to this query

| Score | Mr(calc)  | Delta  | Sequence                                  |
|-------|-----------|--------|-------------------------------------------|
| 42.0  | 1477.7525 | 0.1023 | <a href="#">TGITADDVNAAF<sup>R</sup>K</a> |
| 26.9  | 1477.7381 | 0.1167 | <a href="#">QAIMDGKLTGGMTR</a>            |
| 26.6  | 1477.7599 | 0.0950 | <a href="#">MHSGYIKSDAIK</a>              |
| 26.0  | 1477.7273 | 0.1275 | <a href="#">YAASVGRDAGQEV<sup>R</sup></a> |
| 24.8  | 1477.7776 | 0.0772 | <a href="#">SDAFAKAAADLIASK</a>           |
| 23.6  | 1477.7307 | 0.1241 | <a href="#">RMSTOGDAGATVIR</a>            |
| 23.1  | 1477.7776 | 0.0772 | <a href="#">LTEGYIQLTGIR</a>              |
| 23.0  | 1477.7082 | 0.1466 | <a href="#">SGEVTEADMISALR</a>            |
| 22.3  | 1477.7082 | 0.1466 | <a href="#">NKTILMVDDEER</a>              |
| 21.7  | 1477.7373 | 0.1176 | <a href="#">PSTSAASSVVQSTTR</a>           |

Mascot: <http://www.matrixscience.com/>

**MATRIX SCIENCE Mascot Search Results**

**Peptide View Spot no 39**

MS/MS Fragmentation of **GTMTTTHSYTGDQR**

Found in **gi|115450493** in **NCBI nr**, Os03g0129300 [Oryza sativa Japonica Group]

Match to Query 354: 1554.784824 from(1555.792100,1+) intensity(0.0000) index(29)

Title: Label: H12, Spot\_Id: 219857, Peak\_List\_Id: 227352, MSMS Job\_Run\_Id: 21959, Comment:

Data file C:\Documents and Settings\Administrator\Desktop\Farah-Garima 11May 2013\ppw\_H12\_136868235200.txt

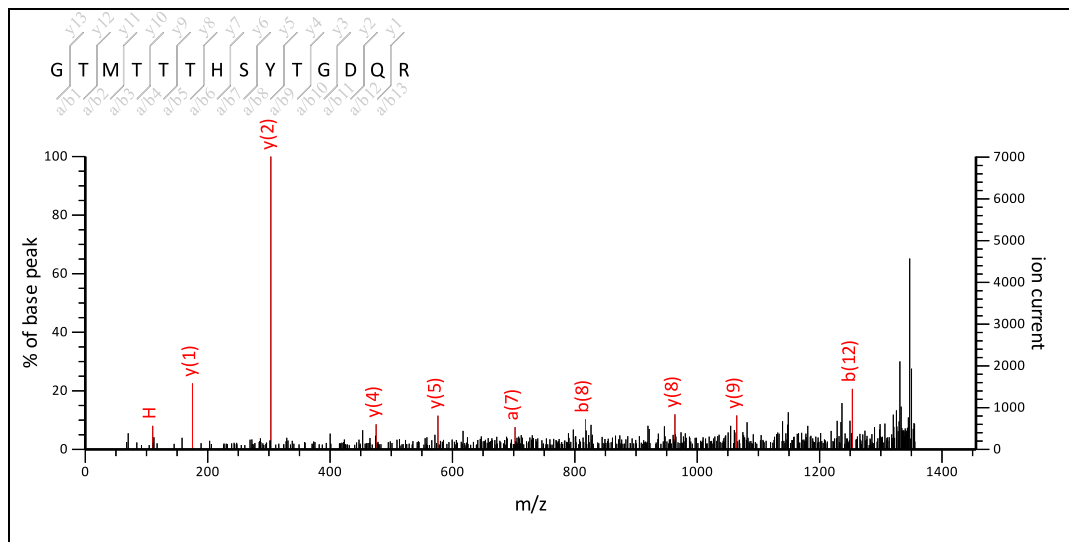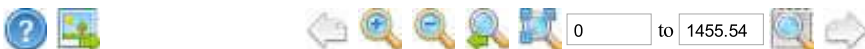

Label all possible matches  Label matches used for scoring

Monoisotopic mass of neutral peptide Mr(calc): 1554.6733

Fixed modifications: Carbamidomethyl (C) (apply to specified residues or termini only)

Ions Score: 42 Expect: 2.2

Matches : 12/235 fragment ions using 13 most intense peaks [\(help\)](#)

| #  | Immon.   | a         | a*        | a <sup>0</sup> | b         | b*        | b <sup>0</sup> | d         | d'        | Seq. | v         | w         | w'        | y         | y*        |
|----|----------|-----------|-----------|----------------|-----------|-----------|----------------|-----------|-----------|------|-----------|-----------|-----------|-----------|-----------|
| 1  | 30.0338  | 30.0338   |           |                | 58.0287   |           |                | 44.0495   |           | G    |           |           |           |           |           |
| 2  | 74.0600  | 131.0815  |           | 113.0709       | 159.0764  |           | 141.0659       | 115.0866  | 117.0659  | T    | 1452.6172 | 1465.6376 | 1467.6169 | 1498.6591 | 1481.6325 |
| 3  | 104.0528 | 262.1220  |           | 244.1114       | 290.1169  |           | 272.1063       | 202.1186  |           | M    | 1321.5767 | 1320.5815 |           | 1397.6114 | 1380.5849 |
| 4  | 74.0600  | 363.1697  |           | 345.1591       | 391.1646  |           | 373.1540       | 347.1748  | 349.1540  | T    | 1220.5291 | 1233.5495 | 1235.5287 | 1266.5709 | 1249.5444 |
| 5  | 74.0600  | 464.2173  |           | 446.2068       | 492.2123  |           | 474.2017       | 448.2224  | 450.2017  | T    | 1119.4814 | 1132.5018 | 1134.4810 | 1165.5232 | 1148.4967 |
| 6  | 74.0600  | 565.2650  |           | 547.2545       | 593.2599  |           | 575.2494       | 549.2701  | 551.2494  | T    | 1018.4337 | 1031.4541 | 1033.4334 | 1064.4756 | 1047.4490 |
| 7  | 110.0713 | 702.3239  |           | 684.3134       | 730.3189  |           | 712.3083       |           |           | H    | 881.3748  |           |           | 963.4279  | 946.4013  |
| 8  | 60.0444  | 789.3560  |           | 771.3454       | 817.3509  |           | 799.3403       | 773.3611  |           | S    | 794.3428  | 793.3475  |           | 826.3690  | 809.3424  |
| 9  | 136.0757 | 952.4193  |           | 934.4087       | 980.4142  |           | 962.4036       |           |           | Y    | 631.2794  |           |           | 739.3369  | 722.3104  |
| 10 | 74.0600  | 1053.4670 |           | 1035.4564      | 1081.4619 |           | 1063.4513      | 1037.4721 | 1039.4513 | T    | 530.2318  | 543.2522  | 545.2314  | 576.2736  | 559.2471  |
| 11 | 30.0338  | 1110.4884 |           | 1092.4779      | 1138.4834 |           | 1120.4728      |           |           | G    |           |           |           | 475.2259  | 458.1994  |
| 12 | 88.0393  | 1225.5154 |           | 1207.5048      | 1253.5103 |           | 1235.4997      | 1181.5256 |           | D    | 358.1833  | 357.1881  |           | 418.2045  | 401.1779  |
| 13 | 101.0709 | 1353.5740 | 1336.5474 | 1335.5634      | 1381.5689 | 1364.5423 | 1363.5583      | 1296.5525 |           | Q    | 230.1248  | 229.1295  |           | 303.1775  | 286.1510  |
| 14 | 129.1135 |           |           |                |           |           |                |           |           | R    | 74.0237   | 73.0284   |           | 175.1190  | 158.0924  |

| Seq    | ya       | yb       | Seq    | ya       | yb       | Seq    | ya       | yb       |
|--------|----------|----------|--------|----------|----------|--------|----------|----------|
| TM     | 205.1005 | 233.0954 | TMT    | 306.1482 | 334.1431 | TMTT   | 407.1959 | 435.1908 |
| TMTT   | 508.2436 | 536.2385 | TMTTH  | 645.3025 | 673.2974 | MT     | 205.1005 | 233.0954 |
| MTT    | 306.1482 | 334.1431 | MTT    | 407.1959 | 435.1908 | MTTTH  | 544.2548 | 572.2497 |
| MTTTHS | 631.2868 | 659.2817 | TT     | 175.1077 | 203.1026 | TTT    | 276.1554 | 304.1503 |
| TTTH   | 413.2143 | 441.2092 | TTTHS  | 500.2463 | 528.2413 | TTTHSY | 663.3097 | 691.3046 |
| TT     | 175.1077 | 203.1026 | TTH    | 312.1666 | 340.1615 | TTHS   | 399.1987 | 427.1936 |
| TTHSY  | 562.2620 | 590.2569 | TTHSYT | 663.3097 | 691.3046 | TH     | 211.1190 | 239.1139 |

|                        |          |          |                        |          |          |                         |          |          |
|------------------------|----------|----------|------------------------|----------|----------|-------------------------|----------|----------|
| <a href="#">THS</a>    | 298.1510 | 326.1459 | <a href="#">THSY</a>   | 461.2143 | 489.2092 | <a href="#">THSYT</a>   | 562.2620 | 590.2569 |
| <a href="#">THSYTG</a> | 619.2835 | 647.2784 | <a href="#">HS</a>     | 197.1033 | 225.0982 | <a href="#">HSY</a>     | 360.1666 | 388.1615 |
| <a href="#">HSYT</a>   | 461.2143 | 489.2092 | <a href="#">HSYTG</a>  | 518.2358 | 546.2307 | <a href="#">HSYTG D</a> | 633.2627 | 661.2576 |
| <a href="#">SY</a>     | 223.1077 | 251.1026 | <a href="#">SYT</a>    | 324.1554 | 352.1503 | <a href="#">SYTG</a>    | 381.1769 | 409.1718 |
| <a href="#">SYTGD</a>  | 496.2038 | 524.1987 | <a href="#">SYTGDQ</a> | 624.2624 | 652.2573 | <a href="#">YT</a>      | 237.1234 | 265.1183 |
| <a href="#">YTG</a>    | 294.1448 | 322.1397 | <a href="#">YTGD</a>   | 409.1718 | 437.1667 | <a href="#">YTGDQ</a>   | 537.2304 | 565.2253 |
| <a href="#">TG</a>     | 131.0815 | 159.0764 | <a href="#">TGD</a>    | 246.1084 | 274.1034 | <a href="#">TGDQ</a>    | 374.1670 | 402.1619 |
| <a href="#">GD</a>     | 145.0608 | 173.0557 | <a href="#">GDQ</a>    | 273.1193 | 301.1143 | <a href="#">DQ</a>      | 216.0979 | 244.0928 |

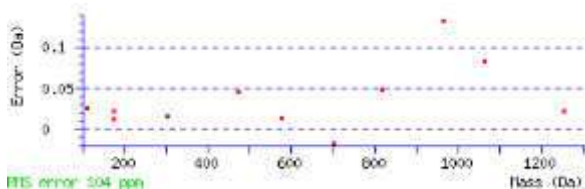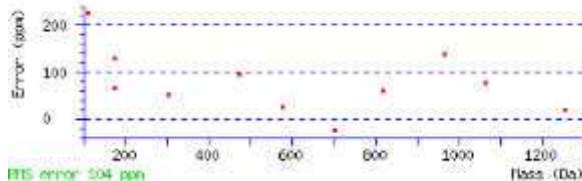

NCBI BLAST search of [GTMTTTHSYTGDQR](#)

(Parameters: blastp, nr protein database, expect=20000, no filter, PAM30)

Other BLAST [web gateways](#)

#### All matches to this query

| Score | M <sub>r</sub> (calc) | Delta   | Sequence                        |
|-------|-----------------------|---------|---------------------------------|
| 41.7  | 1554.6733             | 0.1115  | <a href="#">GTMTTTHSYTGDQR</a>  |
| 32.6  | 1554.8266             | -0.0418 | <a href="#">YLOSTHAAIPNGKR</a>  |
| 28.5  | 1554.6733             | 0.1115  | <a href="#">GSMITVHSYTG DQR</a> |
| 23.4  | 1554.6953             | 0.0896  | <a href="#">MEQSTQMOCIKR</a>    |
| 19.6  | 1554.8188             | -0.0340 | <a href="#">SFRTTLSTVLMGAR</a>  |
| 19.6  | 1554.6998             | 0.0851  | <a href="#">NDNMFWRTTAQR</a>    |
| 18.3  | 1554.7130             | 0.0718  | <a href="#">ITKATTACGTCCQK</a>  |
| 17.4  | 1554.8267             | -0.0418 | <a href="#">OGIATPNGKLWSQR</a>  |
| 17.4  | 1554.8631             | -0.0782 | <a href="#">GVLHKFNALTATOR</a>  |
| 17.4  | 1554.7977             | -0.0128 | <a href="#">HKLLEMIDSWQR</a>    |

Mascot: <http://www.matrixscience.com/>

**MATRIX SCIENCE Mascot Search Results**

**Peptide View Spot no 39**

MS/MS Fragmentation of **ENSPLEVVVVNDSGGVR**

Found in **gi115450493** in **NCBIInr**, Os03g0129300 [Oryza sativa Japonica Group]

Match to Query 377: 1769.017024 from(1770.024300,1+) intensity(0.0000) index(33)

Title: Label: H12, Spot\_Id: 219857, Peak\_List\_Id: 227348, MSMS Job\_Run\_Id: 21959, Comment:

Data file C:\Documents and Settings\Administrator\Desktop\Farah-Garima 11May 2013\ppw\_H12\_136868235200.txt

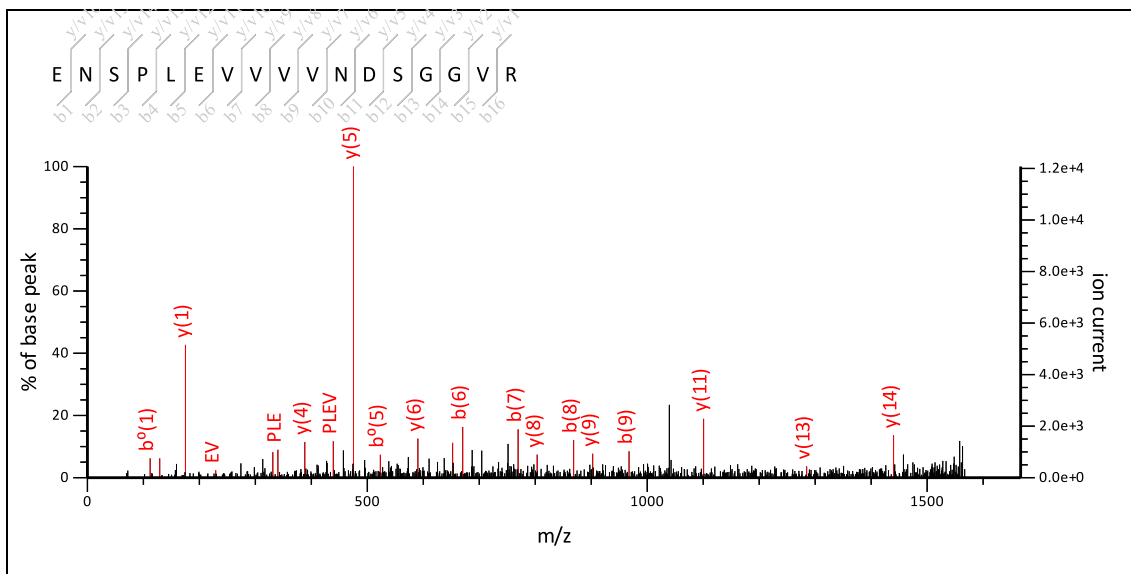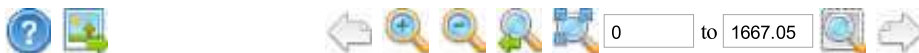

Label all possible matches  Label matches used for scoring

**Monoisotopic mass of neutral peptide Mr(calc):** 1768.8956

**Fixed modifications:** Carbamidomethyl (C) (apply to specified residues or termini only)

**Ions Score:** 63 **Expect:** 0.012

**Matches:** 26/325 fragment ions using 30 most intense peaks ([help](#))

| #  | Immon.   | a         | a*        | a <sup>0</sup> | b         | b*        | b <sup>0</sup> | d         | Seq. | v         | w         | y         | y*        | y <sup>0</sup> | #  |
|----|----------|-----------|-----------|----------------|-----------|-----------|----------------|-----------|------|-----------|-----------|-----------|-----------|----------------|----|
| 1  | 102.0550 | 102.0550  |           | 84.0444        | 130.0499  |           | 112.0393       | 44.0495   | E    |           |           |           |           |                | 17 |
| 2  | 87.0553  | 216.0979  | 199.0713  | 198.0873       | 244.0928  | 227.0662  | 226.0822       | 173.0921  | N    | 1581.8231 | 1580.8279 | 1640.8602 | 1623.8337 | 1622.8497      | 16 |
| 3  | 60.0444  | 303.1299  | 286.1034  | 285.1193       | 331.1248  | 314.0983  | 313.1143       | 287.1350  | S    | 1494.7911 | 1493.7958 | 1526.8173 | 1509.7907 | 1508.8067      | 15 |
| 4  | 70.0651  | 400.1827  | 383.1561  | 382.1721       | 428.1776  | 411.1510  | 410.1670       | 374.1670  | P    | 1397.7383 | 1396.7431 | 1439.7853 | 1422.7587 | 1421.7747      | 14 |
| 5  | 86.0964  | 513.2667  | 496.2402  | 495.2562       | 541.2617  | 524.2351  | 523.2511       | 471.2198  | L    | 1284.6543 | 1283.6590 | 1342.7325 | 1325.7060 | 1324.7219      | 13 |
| 6  | 102.0550 | 642.3093  | 625.2828  | 624.2988       | 670.3042  | 653.2777  | 652.2937       | 584.3039  | E    | 1155.6117 | 1154.6164 | 1229.6484 | 1212.6219 | 1211.6379      | 12 |
| 7  | 72.0808  | 741.3777  | 724.3512  | 723.3672       | 769.3727  | 752.3461  | 751.3621       | 727.3621  | V    | 1056.5432 | 1069.5636 | 1100.6058 | 1083.5793 | 1082.5953      | 11 |
| 8  | 72.0808  | 840.4462  | 823.4196  | 822.4356       | 868.4411  | 851.4145  | 850.4305       | 826.4305  | V    | 957.4748  | 970.4952  | 1001.5374 | 984.5109  | 983.5269       | 10 |
| 9  | 72.0808  | 939.5146  | 922.4880  | 921.5040       | 967.5095  | 950.4829  | 949.4989       | 925.4989  | V    | 858.4064  | 871.4268  | 902.4690  | 885.4425  | 884.4585       | 9  |
| 10 | 72.0808  | 1038.5830 | 1021.5564 | 1020.5724      | 1066.5779 | 1049.5514 | 1048.5673      | 1024.5673 | V    | 759.3380  | 772.3584  | 803.4006  | 786.3741  | 785.3900       | 8  |
| 11 | 87.0553  | 1152.6259 | 1135.5994 | 1134.6153      | 1180.6208 | 1163.5943 | 1162.6103      | 1109.6201 | N    | 645.2951  | 644.2998  | 704.3322  | 687.3056  | 686.3216       | 7  |
| 12 | 88.0393  | 1267.6529 | 1250.6263 | 1249.6423      | 1295.6478 | 1278.6212 | 1277.6372      | 1223.6630 | D    | 530.2681  | 529.2729  | 590.2893  | 573.2627  | 572.2787       | 6  |
| 13 | 60.0444  | 1354.6849 | 1337.6583 | 1336.6743      | 1382.6798 | 1365.6533 | 1364.6692      | 1338.6900 | S    | 443.2361  | 442.2409  | 475.2623  | 458.2358  | 457.2518       | 5  |
| 14 | 30.0338  | 1411.7063 | 1394.6798 | 1393.6958      | 1439.7013 | 1422.6747 | 1421.6907      |           | G    |           |           | 388.2303  | 371.2037  |                | 4  |
| 15 | 30.0338  | 1468.7278 | 1451.7013 | 1450.7172      | 1496.7227 | 1479.6962 | 1478.7122      |           | G    |           |           | 331.2088  | 314.1823  |                | 3  |
| 16 | 72.0808  | 1567.7962 | 1550.7697 | 1549.7857      | 1595.7911 | 1578.7646 | 1577.7806      | 1553.7806 | V    | 230.1248  | 243.1452  | 274.1874  | 257.1608  |                | 2  |
| 17 | 129.1135 |           |           |                |           |           |                |           | R    | 74.0237   | 73.0284   | 175.1190  | 158.0924  |                | 1  |

| Seq | ya       | yb       | Seq | ya       | yb       | Seq  | ya       | yb       |
|-----|----------|----------|-----|----------|----------|------|----------|----------|
| NS  | 174.0873 | 202.0822 | NSP | 271.1401 | 299.1350 | NSPL | 384.2241 | 412.2191 |

|        |          |          |         |          |          |        |          |          |
|--------|----------|----------|---------|----------|----------|--------|----------|----------|
| NSPLE  | 513.2667 | 541.2617 | NSPLEV  | 612.3352 | 640.3301 | SP     | 157.0972 | 185.0921 |
| SPL    | 270.1812 | 298.1761 | SPLE    | 399.2238 | 427.2187 | SPLEV  | 498.2922 | 526.2871 |
| SPLEVV | 597.3606 | 625.3556 | SPLEVVV | 696.4291 | 724.4240 | PL     | 183.1492 | 211.1441 |
| PLE    | 312.1918 | 340.1867 | PLEV    | 411.2602 | 439.2551 | PLEVV  | 510.3286 | 538.3235 |
| PLEVVV | 609.3970 | 637.3919 | LE      | 215.1390 | 243.1339 | LEV    | 314.2074 | 342.2023 |
| LEVV   | 413.2758 | 441.2708 | LEVVV   | 512.3443 | 540.3392 | LEVVVV | 611.4127 | 639.4076 |
| EV     | 201.1234 | 229.1183 | EVV     | 300.1918 | 328.1867 | EVVV   | 399.2602 | 427.2551 |
| EVVVV  | 498.3286 | 526.3235 | EVVVVN  | 612.3715 | 640.3665 | VV     | 171.1492 | 199.1441 |
| VVV    | 270.2176 | 298.2125 | VVVV    | 369.2860 | 397.2809 | VVVVN  | 483.3289 | 511.3239 |
| VVVVND | 598.3559 | 626.3508 | VVVVNS  | 685.3879 | 713.3828 | VV     | 171.1492 | 199.1441 |
| VVV    | 270.2176 | 298.2125 | VVVN    | 384.2605 | 412.2554 | VVVND  | 499.2875 | 527.2824 |
| VVVNS  | 586.3195 | 614.3144 | VVVNSG  | 643.3410 | 671.3359 | VV     | 171.1492 | 199.1441 |
| VVN    | 285.1921 | 313.1870 | VVND    | 400.2191 | 428.2140 | VVNS   | 487.2511 | 515.2460 |
| VVNSG  | 544.2726 | 572.2675 | VVNSGG  | 601.2940 | 629.2889 | VN     | 186.1237 | 214.1186 |
| VND    | 301.1506 | 329.1456 | VNS     | 388.1827 | 416.1776 | VNSG   | 445.2041 | 473.1991 |
| VNSGG  | 502.2256 | 530.2205 | VNSGGV  | 601.2940 | 629.2889 | ND     | 202.0822 | 230.0771 |
| NDS    | 289.1143 | 317.1092 | NDSG    | 346.1357 | 374.1306 | NDSGG  | 403.1572 | 431.1521 |
| NDSGGV | 502.2256 | 530.2205 | DS      | 175.0713 | 203.0662 | DSG    | 232.0928 | 260.0877 |
| DSGG   | 289.1143 | 317.1092 | DSGGV   | 388.1827 | 416.1776 | SG     | 117.0659 | 145.0608 |
| SGG    | 174.0873 | 202.0822 | SGGV    | 273.1557 | 301.1506 | GG     | 87.0553  | 115.0502 |
| GGV    | 186.1237 | 214.1186 | GV      | 129.1022 | 157.0972 |        |          |          |

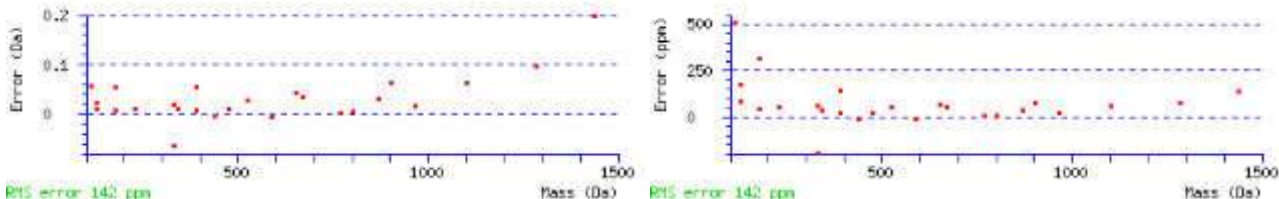

NCBI BLAST search of [ENSPLEVVVVNSGGVR](#)  
 (Parameters: blastp, nr protein database, expect=20000, no filter, PAM30)  
 Other BLAST [web gateways](#)

All matches to this query

| Score | Mr(calc)  | Delta  | Sequence                              |
|-------|-----------|--------|---------------------------------------|
| 62.9  | 1768.8956 | 0.1215 | <a href="#">ENSPLEVVVVNSGGVR</a>      |
| 28.5  | 1768.9571 | 0.0599 | <a href="#">KDSPLEVVVINDTGGVK</a>     |
| 21.0  | 1768.9068 | 0.1103 | <a href="#">GSEGTELEVPVNAVGR</a>      |
| 18.4  | 1768.9207 | 0.0963 | <a href="#">ENSPLEVVVINDTGGVK</a>     |
| 18.1  | 1768.8492 | 0.1678 | <a href="#">EGDPSOYHSVPEIRR</a>       |
| 17.6  | 1768.8778 | 0.1392 | <a href="#">QCVSDAKIHODELVK</a>       |
| 16.9  | 1768.9544 | 0.0627 | <a href="#">KGGAAAGLNAGAGASLVSAAR</a> |
| 16.1  | 1768.9571 | 0.0599 | <a href="#">KDSPLDIVVINDTGGVK</a>     |
| 16.1  | 1768.8956 | 0.1215 | <a href="#">AADISDPVVVTPNASGR</a>     |
| 15.9  | 1768.9757 | 0.0413 | <a href="#">ELPAGSTIVVVLMDGIR</a>     |

Mascot: <http://www.matrixscience.com/>




**Mascot Search Results**
**Peptide View Spot no 39**

 MS/MS Fragmentation of **VPTPNVSVVDLVINTVK**

 Found in **gi|115450493** in **NCBI nr**, Os03g0129300 [Oryza sativa Japonica Group]

Match to Query 383: 1793.118824 from(1794.126100,1+) intensity(0.0000) index(34)

Title: Label: H12, Spot\_Id: 219857, Peak\_List\_Id: 227356, MSMS Job\_Run\_Id: 21959, Comment:

Data file C:\Documents and Settings\Administrator\Desktop\Farah-Garima 11May 2013\ppw\_H12\_136868235200.txt

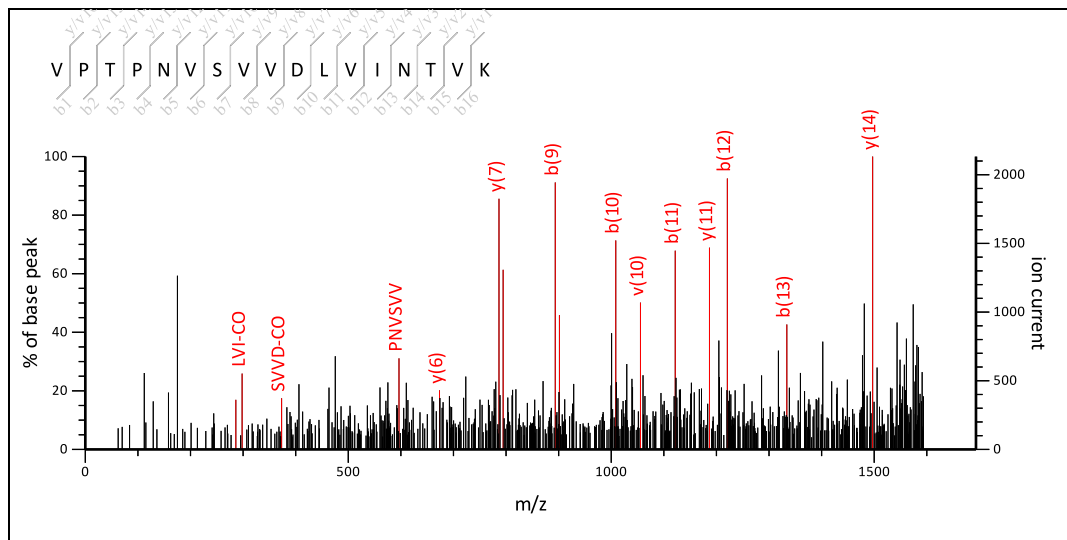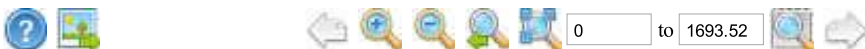
 Label all possible matches  Label matches used for scoring 

Monoisotopic mass of neutral peptide Mr(calc): 1793.0299

Fixed modifications: Carbamidomethyl (C) (apply to specified residues or termini only)

Ions Score: 30 Expect: 7.6

 Matches : 20/329 fragment ions using 32 most intense peaks ([help](#))

| #  | Immon.   | a         | a*        | a <sup>0</sup> | b                | b*        | b <sup>0</sup> | d         | d'        | Seq. | v                | w         | w'        | y                | y*        |
|----|----------|-----------|-----------|----------------|------------------|-----------|----------------|-----------|-----------|------|------------------|-----------|-----------|------------------|-----------|
| 1  | 72.0808  | 72.0808   |           |                | 100.0757         |           |                | 44.0495   |           | V    |                  |           |           |                  |           |
| 2  | 70.0651  | 169.1335  |           |                | 197.1285         |           |                | 143.1179  |           | P    | 1652.9218        | 1651.9265 |           | 1694.9687        | 1677.9422 |
| 3  | 74.0600  | 270.1812  |           | 252.1707       | <b>298.1761</b>  |           | 280.1656       | 254.1863  | 256.1656  | T    | 1551.8741        | 1564.8945 | 1566.8738 | 1597.9159        | 1580.8894 |
| 4  | 70.0651  | 367.2340  |           | 349.2234       | 395.2289         |           | 377.2183       | 341.2183  |           | P    | 1454.8213        | 1453.8261 |           | <b>1496.8683</b> | 1479.8417 |
| 5  | 87.0553  | 481.2769  | 464.2504  | 463.2663       | 509.2718         | 492.2453  | 491.2613       | 438.2711  |           | N    | 1340.7784        | 1339.7831 |           | 1399.8155        | 1382.7890 |
| 6  | 72.0808  | 580.3453  | 563.3188  | 562.3348       | 608.3402         | 591.3137  | 590.3297       | 566.3297  |           | V    | 1241.7100        | 1254.7304 |           | 1285.7726        | 1268.7460 |
| 7  | 60.0444  | 667.3774  | 650.3508  | 649.3668       | 695.3723         | 678.3457  | 677.3617       | 651.3824  |           | S    | 1154.6780        | 1153.6827 |           | <b>1186.7042</b> | 1169.6776 |
| 8  | 72.0808  | 766.4458  | 749.4192  | 748.4352       | <b>794.4407</b>  | 777.4141  | 776.4301       | 752.4301  |           | V    | <b>1055.6095</b> | 1068.6299 |           | 1099.6721        | 1082.6456 |
| 9  | 72.0808  | 865.5142  | 848.4876  | 847.5036       | <b>893.5091</b>  | 876.4825  | 875.4985       | 851.4985  |           | V    | 956.5411         | 969.5615  |           | 1000.6037        | 983.5772  |
| 10 | 88.0393  | 980.5411  | 963.5146  | 962.5306       | <b>1008.5360</b> | 991.5095  | 990.5255       | 936.5513  |           | D    | 841.5142         | 840.5189  |           | <b>901.5353</b>  | 884.5088  |
| 11 | 86.0964  | 1093.6252 | 1076.5986 | 1075.6146      | <b>1121.6201</b> | 1104.5936 | 1103.6095      | 1051.5782 |           | L    | 728.4301         | 727.4349  |           | <b>786.5084</b>  | 769.4818  |
| 12 | 72.0808  | 1192.6936 | 1175.6671 | 1174.6830      | <b>1220.6885</b> | 1203.6620 | 1202.6780      | 1178.6780 |           | V    | 629.3617         | 642.3821  |           | <b>673.4243</b>  | 656.3978  |
| 13 | 86.0964  | 1305.7777 | 1288.7511 | 1287.7671      | <b>1333.7726</b> | 1316.7460 | 1315.7620      | 1277.7464 | 1291.7620 | I    | 516.2776         | 529.2980  | 543.3137  | 574.3559         | 557.3293  |
| 14 | 87.0553  | 1419.8206 | 1402.7940 | 1401.8100      | 1447.8155        | 1430.7890 | 1429.8049      | 1376.8148 |           | N    | 402.2347         | 401.2395  |           | 461.2718         | 444.2453  |
| 15 | 74.0600  | 1520.8683 | 1503.8417 | 1502.8577      | 1548.8632        | 1531.8366 | 1530.8526      | 1504.8734 | 1506.8526 | T    | 301.1870         | 314.2074  | 316.1867  | 347.2289         | 330.2023  |
| 16 | 72.0808  | 1619.9367 | 1602.9101 | 1601.9261      | 1647.9316        | 1630.9051 | 1629.9210      | 1605.9210 |           | V    | 202.1186         | 215.1390  |           | 246.1812         | 229.1547  |
| 17 | 101.1073 |           |           |                |                  |           |                |           |           | K    | 74.0237          | 73.0284   |           | 147.1128         | 130.0863  |

| Seq   | ya       | yb       | Seq    | ya       | yb              | Seq     | ya       | yb       |
|-------|----------|----------|--------|----------|-----------------|---------|----------|----------|
| PT    | 171.1128 | 199.1077 | PTP    | 268.1656 | 296.1605        | PTPN    | 382.2085 | 410.2034 |
| PTPNV | 481.2769 | 509.2718 | PTPNVS | 568.3089 | <b>596.3039</b> | PTPNVSV | 667.3774 | 695.3723 |
| TP    | 171.1128 | 199.1077 | TPN    | 285.1557 | 313.1506        | TPNV    | 384.2241 | 412.2191 |
| TPNVS | 471.2562 | 499.2511 | TPNVSV | 570.3246 | 598.3195        | TPNVSVV | 669.3930 | 697.3879 |



|               |          |          |               |                 |                 |                |                 |          |
|---------------|----------|----------|---------------|-----------------|-----------------|----------------|-----------------|----------|
| <b>PN</b>     | 184.1081 | 212.1030 | <b>PNV</b>    | 283.1765        | 311.1714        | <b>PNVS</b>    | 370.2085        | 398.2034 |
| <b>PNVSV</b>  | 469.2769 | 497.2718 | <b>PNVSVV</b> | 568.3453        | <b>596.3402</b> | <b>PNVSVVD</b> | 683.3723        | 711.3672 |
| <b>NV</b>     | 186.1237 | 214.1186 | <b>NVS</b>    | 273.1557        | 301.1506        | <b>NVSV</b>    | 372.2241        | 400.2191 |
| <b>NVSVV</b>  | 471.2926 | 499.2875 | <b>NVSVVD</b> | 586.3195        | 614.3144        | <b>NVSVVDL</b> | 699.4036        | 727.3985 |
| <b>VS</b>     | 159.1128 | 187.1077 | <b>VSV</b>    | 258.1812        | <b>286.1761</b> | <b>VSVV</b>    | 357.2496        | 385.2445 |
| <b>VSVVD</b>  | 472.2766 | 500.2715 | <b>VSVVDL</b> | 585.3606        | 613.3556        | <b>VSVVDLV</b> | 684.4291        | 712.4240 |
| <b>SV</b>     | 159.1128 | 187.1077 | <b>SVV</b>    | 258.1812        | <b>286.1761</b> | <b>SVVD</b>    | <b>373.2082</b> | 401.2031 |
| <b>SVVDL</b>  | 486.2922 | 514.2871 | <b>SVVDLV</b> | 585.3606        | 613.3556        | <b>SVVDLVI</b> | 698.4447        | 726.4396 |
| <b>VV</b>     | 171.1492 | 199.1441 | <b>VVD</b>    | <b>286.1761</b> | 314.1710        | <b>VVDL</b>    | 399.2602        | 427.2551 |
| <b>VVDLV</b>  | 498.3286 | 526.3235 | <b>VVDLVI</b> | 611.4127        | 639.4076        | <b>VD</b>      | 187.1077        | 215.1026 |
| <b>VDL</b>    | 300.1918 | 328.1867 | <b>VDLV</b>   | 399.2602        | 427.2551        | <b>VDLVI</b>   | 512.3443        | 540.3392 |
| <b>VDLVIN</b> | 626.3872 | 654.3821 | <b>DL</b>     | 201.1234        | 229.1183        | <b>DLV</b>     | 300.1918        | 328.1867 |
| <b>DLVI</b>   | 413.2758 | 441.2708 | <b>DLVIN</b>  | 527.3188        | 555.3137        | <b>DLVINT</b>  | 628.3665        | 656.3614 |
| <b>LV</b>     | 185.1648 | 213.1598 | <b>LVI</b>    | <b>298.2489</b> | 326.2438        | <b>LVIN</b>    | 412.2918        | 440.2867 |
| <b>LVINT</b>  | 513.3395 | 541.3344 | <b>LVINTV</b> | 612.4079        | 640.4028        | <b>VI</b>      | 185.1648        | 213.1598 |
| <b>VIN</b>    | 299.2078 | 327.2027 | <b>VINT</b>   | 400.2554        | 428.2504        | <b>VINTV</b>   | 499.3239        | 527.3188 |
| <b>IN</b>     | 200.1394 | 228.1343 | <b>INT</b>    | 301.1870        | 329.1819        | <b>INTV</b>    | 400.2554        | 428.2504 |
| <b>NT</b>     | 188.1030 | 216.0979 | <b>NTV</b>    | 287.1714        | 315.1663        | <b>TV</b>      | 173.1285        | 201.1234 |

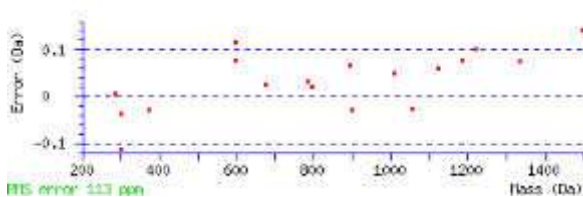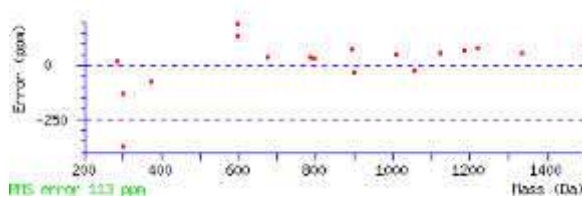

NCBI **BLAST** search of [VPTPNVSVVDLVVNVDK](#)

(Parameters: blastp, nr protein database, expect=20000, no filter, PAM30)

Other BLAST [web gateways](#)

#### All matches to this query

| Score | Mr(calc)  | Delta  | Sequence                           |
|-------|-----------|--------|------------------------------------|
| 30.6  | 1792.9935 | 0.1253 | <a href="#">VPTPNVSVVDLVVNVDK</a>  |
| 30.1  | 1793.0299 | 0.0889 | <a href="#">VPTPNVSVVDLVVINTVK</a> |
| 29.1  | 1793.0299 | 0.0889 | <a href="#">VPTPNVSVVDLVVQISK</a>  |
| 29.1  | 1793.0299 | 0.0889 | <a href="#">VPTPNVSVVDLVVQVTK</a>  |
| 24.9  | 1793.0411 | 0.0777 | <a href="#">VPTPNVSVVDLKAFLSR</a>  |
| 23.3  | 1792.9505 | 0.1683 | <a href="#">MANKLVLDGNSIAYR</a>    |
| 22.7  | 1793.0411 | 0.0777 | <a href="#">VPTPNVSVVDLTVRLGK</a>  |
| 22.5  | 1792.9935 | 0.1253 | <a href="#">VPTPNVSVVDLVAQVEK</a>  |
| 17.2  | 1793.0451 | 0.0737 | <a href="#">LIAFEIYGTLAKVSR</a>    |
| 16.8  | 1792.9472 | 0.1716 | <a href="#">HPELPVEVVSGLFTGR</a>   |

Mascot: <http://www.matrixscience.com/>

# MATRIX SCIENCE Mascot Search Results

## Peptide View **Spot no 40**

MS/MS Fragmentation of **CVFPDQR**

Found in **gi|297604125** in **NCBIInr**, Os05g0247100 [Oryza sativa Japonica Group]

Match to Query 3: 920.402754 from(921.410030,1+) intensity(0.0000) index(2)

Title: Label: B5, Spot\_Id: 219739, Peak\_List\_Id: 225587, MSMS Job\_Run\_Id: 21783, Comment:

Data file C:\Documents and Settings\Administrator\Desktop\farah BHU\spot set plate\Farah-Garima 11May 2013\ppw\_B5\_136842181400.txt

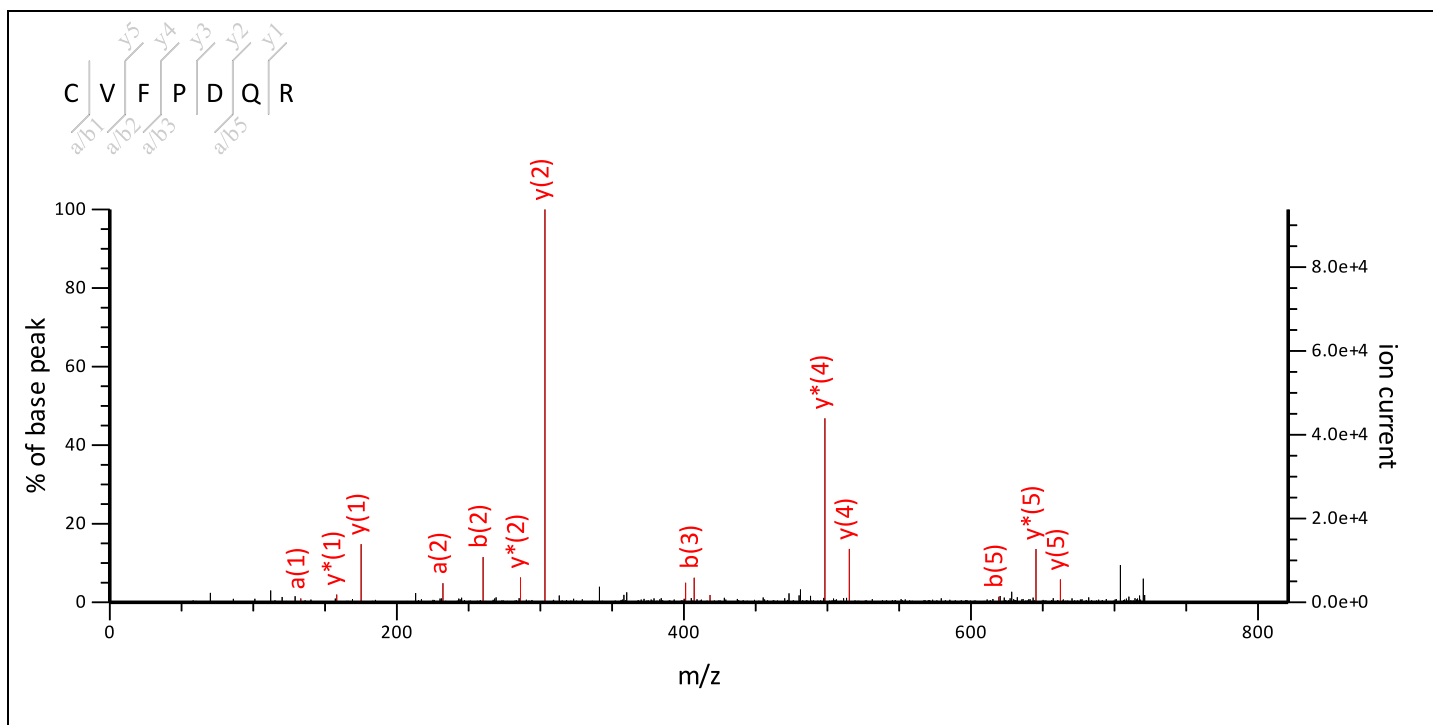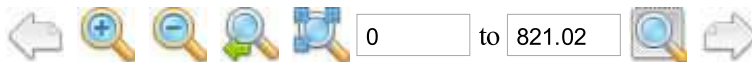

Label all possible matches  Label matches used for scoring

**Monoisotopic mass of neutral peptide Mr(calc):** 920.4175

**Fixed modifications:** Carbamidomethyl (C) (apply to specified residues or termini only)

**Ions Score:** 24 **Expect:** 9.1

**Matches :** 15/26 fragment ions using 35 most intense peaks ([help](#))

| # | a        | a*       | b        | b*       | Seq. | y        | y*       | # |
|---|----------|----------|----------|----------|------|----------|----------|---|
| 1 | 133.0430 |          | 161.0379 |          | C    |          |          | 7 |
| 2 | 232.1114 |          | 260.1063 |          | V    | 761.3941 | 744.3675 | 6 |
| 3 | 379.1798 |          | 407.1748 |          | F    | 662.3257 | 645.2991 | 5 |
| 4 | 476.2326 |          | 504.2275 |          | P    | 515.2572 | 498.2307 | 4 |
| 5 | 591.2595 |          | 619.2545 |          | D    | 418.2045 | 401.1779 | 3 |
| 6 | 719.3181 | 702.2916 | 747.3130 | 730.2865 | Q    | 303.1775 | 286.1510 | 2 |
| 7 |          |          |          |          | R    | 175.1190 | 158.0924 | 1 |

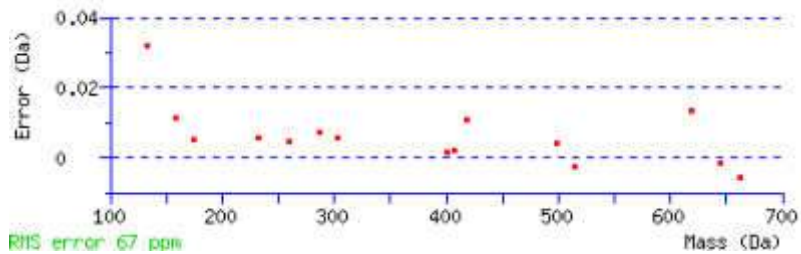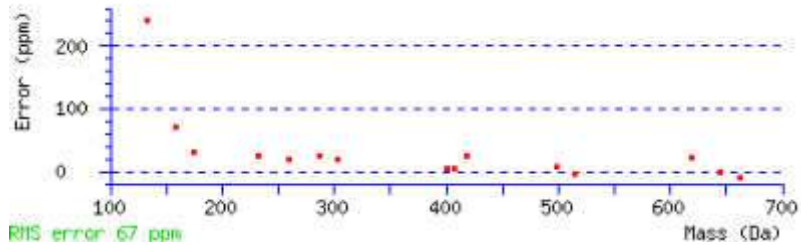

NCBI **BLAST** search of [CVFPDQR](#)

(Parameters: blastp, nr protein database, expect=20000, no filter, PAM30)

Other BLAST [web gateways](#)

#### All matches to this query

| Score | Mr(calc) | Delta   | Sequence                  |
|-------|----------|---------|---------------------------|
| 29.3  | 920.4749 | -0.0722 | <a href="#">KTIEMAGR</a>  |
| 23.6  | 920.4175 | -0.0147 | <a href="#">CVFPDQR</a>   |
| 20.5  | 920.4749 | -0.0722 | <a href="#">MTSAVLAGR</a> |
| 19.0  | 920.4174 | -0.0147 | <a href="#">QMFPADGR</a>  |
| 18.9  | 920.4936 | -0.0908 | <a href="#">MKMLVQR</a>   |
| 18.9  | 920.4902 | -0.0874 | <a href="#">MQFIVQR</a>   |
| 18.6  | 920.4803 | -0.0775 | <a href="#">XXLALVQR</a>  |
| 18.3  | 920.4385 | -0.0358 | <a href="#">NDLEMKR</a>   |
| 18.1  | 920.4749 | -0.0722 | <a href="#">VLMSDGKR</a>  |
| 17.9  | 920.3472 | 0.0556  | <a href="#">SDGEDDAGR</a> |

Mascot: <http://www.matrixscience.com/>

# MATRIX SCIENCE Mascot Search Results

## Peptide View **Spot no 40**

MS/MS Fragmentation of **LGVMLTATAR**

Found in **gi|297604125** in **NCBIInr**, Os05g0247100 [Oryza sativa Japonica Group]

Match to Query 9: 1031.571624 from(1032.578900,1+) intensity(0.0000) index(8)

Title: Label: B5, Spot\_Id: 219739, Peak\_List\_Id: 225593, MSMS Job\_Run\_Id: 21783, Comment:

Data file C:\Documents and Settings\Administrator\Desktop\farah BHU\spot set plate\Farah-Garima 11May 2013\ppw\_B5\_136842181400.txt

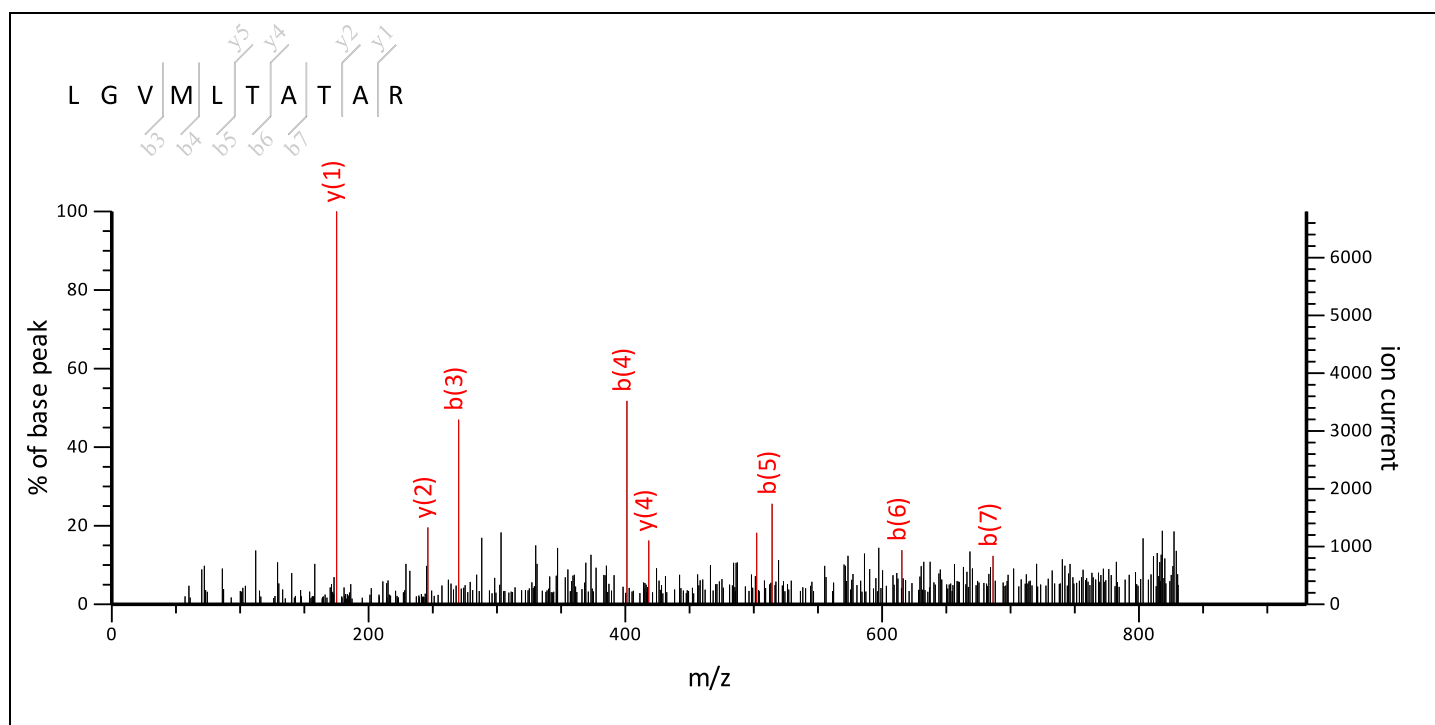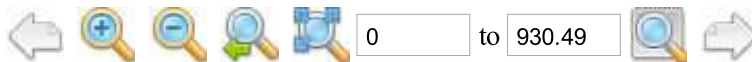

Label all possible matches  Label matches used for scoring

**Monoisotopic mass of neutral peptide Mr(calc):** 1031.5797

**Fixed modifications:** Carbamidomethyl (C) (apply to specified residues or termini only)

**Ions Score:** 32 **Expect:** 1.7

**Matches :** 11/36 fragment ions using 16 most intense peaks ([help](#))

| # | a        | b               | Seq. | y               | y*              | #  |
|---|----------|-----------------|------|-----------------|-----------------|----|
| 1 | 86.0964  | 114.0913        | L    |                 |                 | 10 |
| 2 | 143.1179 | 171.1128        | G    | 919.5030        | 902.4764        | 9  |
| 3 | 242.1863 | <b>270.1812</b> | V    | 862.4815        | 845.4550        | 8  |
| 4 | 373.2268 | <b>401.2217</b> | M    | 763.4131        | 746.3865        | 7  |
| 5 | 486.3109 | <b>514.3058</b> | L    | 632.3726        | <b>615.3461</b> | 6  |
| 6 | 587.3585 | <b>615.3534</b> | T    | 519.2885        | <b>502.2620</b> | 5  |
| 7 | 658.3956 | <b>686.3906</b> | A    | <b>418.2409</b> | <b>401.2143</b> | 4  |
| 8 | 759.4433 | 787.4382        | T    | 347.2037        | 330.1772        | 3  |

|    |          |          |   |          |          |   |
|----|----------|----------|---|----------|----------|---|
| 9  | 830.4804 | 858.4754 | A | 246.1561 | 229.1295 | 2 |
| 10 |          |          | R | 175.1190 | 158.0924 | 1 |

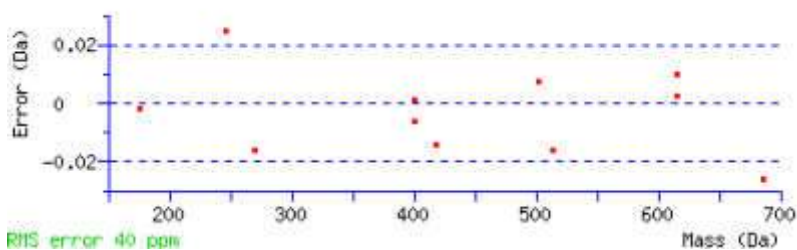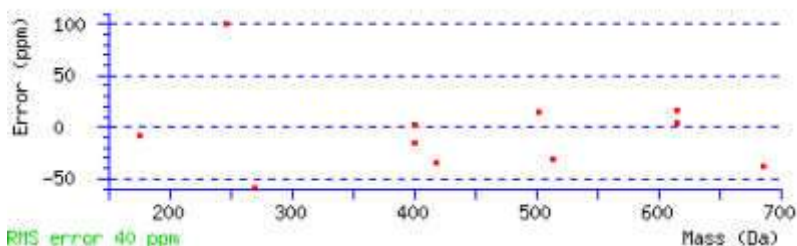

NCBI **BLAST** search of [LGVMLTATAR](#)

(Parameters: blastp, nr protein database, expect=20000, no filter, PAM30)

Other BLAST [web gateways](#)

#### All matches to this query

| Score | Mr(calc)  | Delta   | Sequence                     |
|-------|-----------|---------|------------------------------|
| 31.8  | 1031.5797 | -0.0081 | <a href="#">LGVMLTATAR</a>   |
| 23.6  | 1031.5400 | 0.0316  | <a href="#">KFPELADGR</a>    |
| 19.6  | 1031.5433 | 0.0283  | <a href="#">AANDMLIIR</a>    |
| 19.6  | 1031.5797 | -0.0081 | <a href="#">DQKMLLLR</a>     |
| 18.7  | 1031.5433 | 0.0283  | <a href="#">CEQTLILR</a>     |
| 18.7  | 1031.5910 | -0.0193 | <a href="#">MNRTIILR</a>     |
| 18.2  | 1031.5508 | 0.0209  | <a href="#">VIGMIPGMAK</a>   |
| 18.2  | 1031.5508 | 0.0209  | <a href="#">VLGMIPGMAK</a>   |
| 18.1  | 1031.5182 | 0.0534  | <a href="#">MTNAGAALGAR</a>  |
| 17.5  | 1031.4996 | 0.0720  | <a href="#">GASGAAVTADGR</a> |

Mascot: <http://www.matrixscience.com/>

# MATRIX SCIENCE Mascot Search Results

## Peptide View **Spot no 40**

MS/MS Fragmentation of **IHKVFGDGR**

Found in **gi|297604125** in **NCBIInr**, Os05g0247100 [Oryza sativa Japonica Group]

Match to Query 13: 1126.616524 from(1127.623800,1+) intensity(0.0000) index(12)

Title: Label: B5, Spot\_Id: 219739, Peak\_List\_Id: 225590, MSMS Job\_Run\_Id: 21783, Comment:

Data file C:\Documents and Settings\Administrator\Desktop\farah BHU\spot set plate\Farah-Garima 11May 2013\ppw\_B5\_136842181400.txt

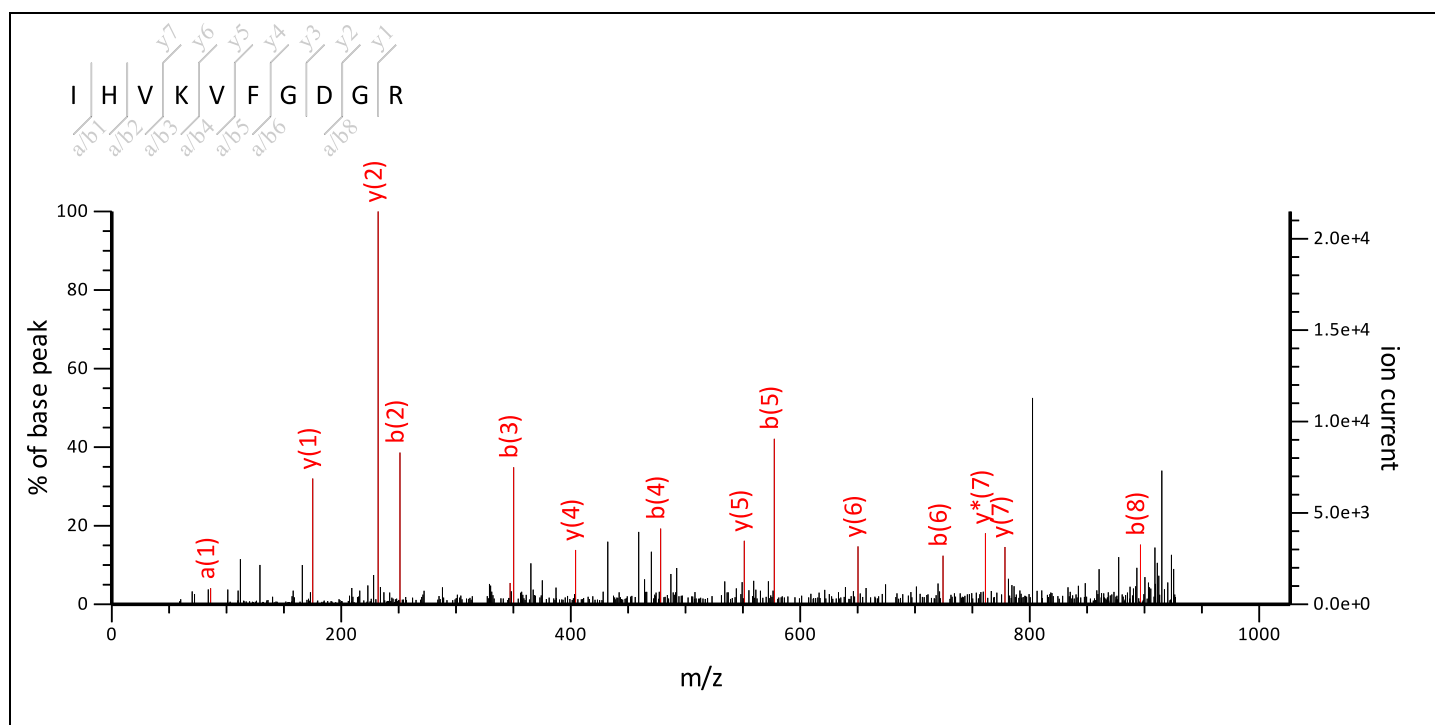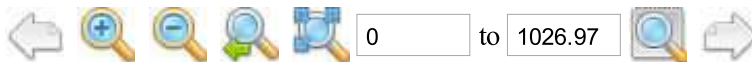

Label all possible matches  Label matches used for scoring

**Monoisotopic mass of neutral peptide Mr(calc):** 1126.6247

**Fixed modifications:** Carbamidomethyl (C) (apply to specified residues or termini only)

**Ions Score:** 44 **Expect:** 0.084

**Matches:** 15/48 fragment ions using 27 most intense peaks ([help](#))

| # | a        | a*       | b        | b*       | Seq. | y         | y*       | #  |
|---|----------|----------|----------|----------|------|-----------|----------|----|
| 1 | 86.0964  |          | 114.0913 |          | I    |           |          | 10 |
| 2 | 223.1553 |          | 251.1503 |          | H    | 1014.5479 | 997.5214 | 9  |
| 3 | 322.2238 |          | 350.2187 |          | V    | 877.4890  | 860.4625 | 8  |
| 4 | 450.3187 | 433.2922 | 478.3136 | 461.2871 | K    | 778.4206  | 761.3941 | 7  |
| 5 | 549.3871 | 532.3606 | 577.3820 | 560.3555 | V    | 650.3257  | 633.2991 | 6  |
| 6 | 696.4555 | 679.4290 | 724.4505 | 707.4239 | F    | 551.2572  | 534.2307 | 5  |
| 7 | 753.4770 | 736.4505 | 781.4719 | 764.4454 | G    | 404.1888  | 387.1623 | 4  |
| 8 | 868.5039 | 851.4774 | 896.4989 | 879.4723 | D    | 347.1674  | 330.1408 | 3  |

|    |          |          |          |          |   |                 |          |   |
|----|----------|----------|----------|----------|---|-----------------|----------|---|
| 9  | 925.5254 | 908.4989 | 953.5203 | 936.4938 | G | <b>232.1404</b> | 215.1139 | 2 |
| 10 |          |          |          |          | R | <b>175.1190</b> | 158.0924 | 1 |

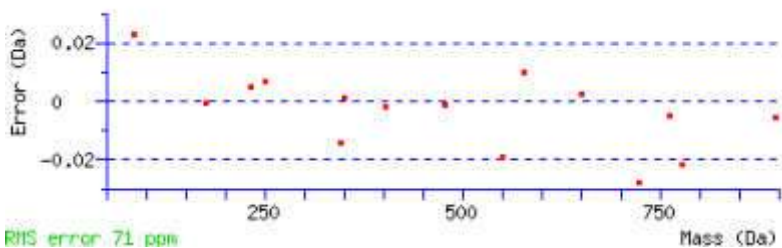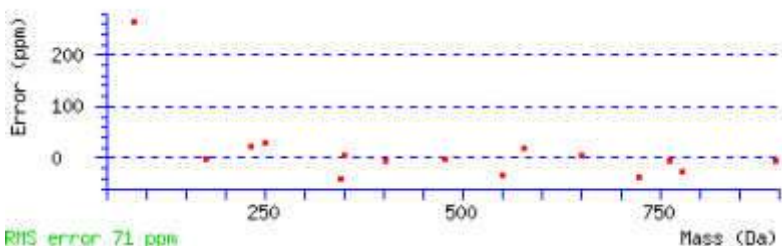

NCBI **BLAST** search of [IHVKVFGDGR](#)

(Parameters: blastp, nr protein database, expect=20000, no filter, PAM30)

Other BLAST [web gateways](#)

#### All matches to this query

| Score | Mr(calc)  | Delta   | Sequence                    |
|-------|-----------|---------|-----------------------------|
| 43.6  | 1126.6247 | -0.0082 | <a href="#">IHVKVFGDGR</a>  |
| 14.0  | 1126.5553 | 0.0612  | <a href="#">HTKMLPGDGR</a>  |
| 12.6  | 1126.5619 | 0.0547  | <a href="#">DLPPSTIGDGR</a> |
| 12.5  | 1126.5441 | 0.0724  | <a href="#">TPAPSPMTGR</a>  |
| 11.4  | 1126.5376 | 0.0789  | <a href="#">VCSGFVMRR</a>   |
| 11.0  | 1126.5376 | 0.0790  | <a href="#">ARGMMAVGER</a>  |
| 10.6  | 1126.5515 | 0.0651  | <a href="#">MFNLAMGLSK</a>  |
| 10.4  | 1126.5255 | 0.0911  | <a href="#">IDPTGPAEDGR</a> |
| 9.8   | 1126.5454 | 0.0711  | <a href="#">RLHGWMDGR</a>   |
| 8.2   | 1126.5441 | 0.0725  | <a href="#">SYVKAMEQR</a>   |

Mascot: <http://www.matrixscience.com/>





# Mascot Search Results

## Peptide View **Spot no 40**

MS/MS Fragmentation of **LYAHNKDYK**

Found in **gi|297604125** in **NCBIInr**, Os05g0247100 [Oryza sativa Japonica Group]

Match to Query 14: 1150.566224 from(1151.573500,1+) intensity(0.0000) index(13)

Title: Label: B5, Spot\_Id: 219739, Peak\_List\_Id: 225597, MSMS Job\_Run\_Id: 21783, Comment:

Data file C:\Documents and Settings\Administrator\Desktop\farah BHU\spot set plate\Farah-Garima 11May 2013\ppw\_B5\_136842181400.txt

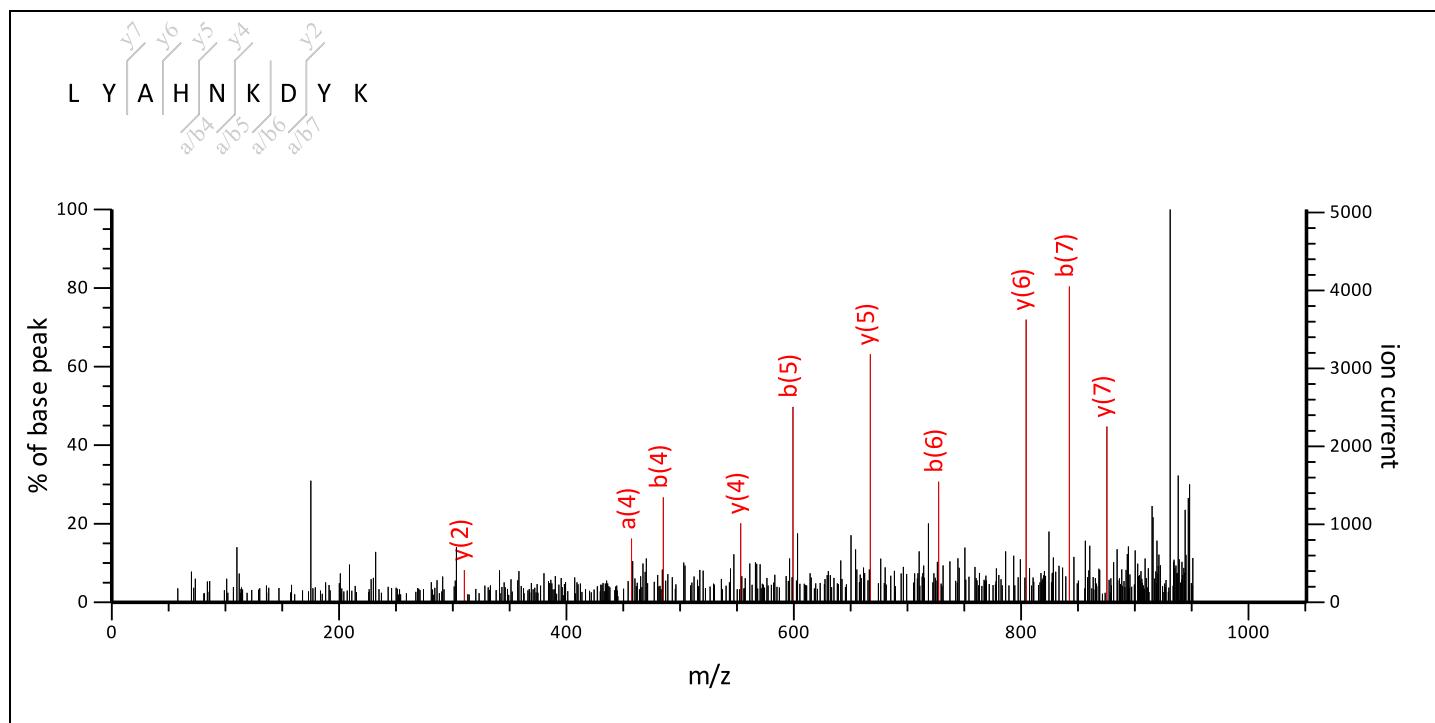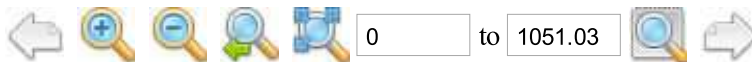

Label all possible matches  Label matches used for scoring

**Monoisotopic mass of neutral peptide Mr(calc):** 1150.5771

**Fixed modifications:** Carbamidomethyl (C) (apply to specified residues or termini only)

**Ions Score:** 26 **Expect:** 6.3

**Matches :** 10/40 fragment ions using 18 most intense peaks ([help](#))

| # | a               | a*       | b               | b*       | Seq. | y               | y*        | # |
|---|-----------------|----------|-----------------|----------|------|-----------------|-----------|---|
| 1 | 86.0964         |          | 114.0913        |          | L    |                 |           | 9 |
| 2 | 249.1598        |          | 277.1547        |          | Y    | 1038.5003       | 1021.4738 | 8 |
| 3 | 320.1969        |          | 348.1918        |          | A    | <b>875.4370</b> | 858.4104  | 7 |
| 4 | <b>457.2558</b> |          | <b>485.2507</b> |          | H    | <b>804.3999</b> | 787.3733  | 6 |
| 5 | 571.2987        | 554.2722 | <b>599.2936</b> | 582.2671 | N    | <b>667.3410</b> | 650.3144  | 5 |
| 6 | 699.3937        | 682.3671 | <b>727.3886</b> | 710.3620 | K    | <b>553.2980</b> | 536.2715  | 4 |
| 7 | 814.4206        | 797.3941 | <b>842.4155</b> | 825.3890 | D    | 425.2031        | 408.1765  | 3 |
| 8 | 977.4839        | 960.4574 | 1005.4789       | 988.4523 | Y    | <b>310.1761</b> | 293.1496  | 2 |

|   |  |  |  |  |   |          |          |   |
|---|--|--|--|--|---|----------|----------|---|
| 9 |  |  |  |  | K | 147.1128 | 130.0863 | 1 |
|---|--|--|--|--|---|----------|----------|---|

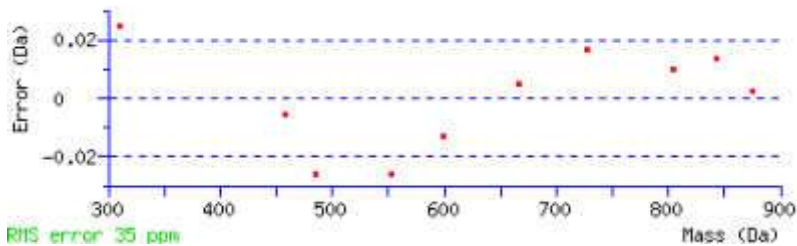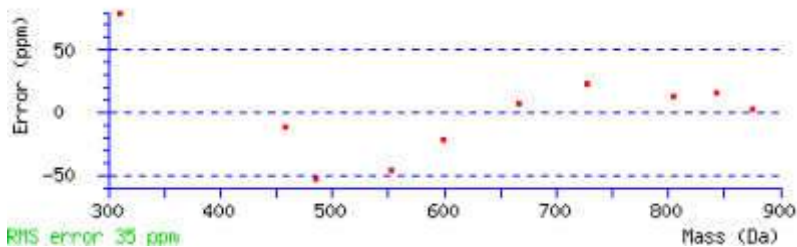

NCBI BLAST search of [LYAHNKDYK](#)

(Parameters: blastp, nr protein database, expect=20000, no filter, PAM30)

Other BLAST [web gateways](#)

#### All matches to this query

| Score | Mr(calc)  | Delta   | Sequence                    |
|-------|-----------|---------|-----------------------------|
| 26.5  | 1150.5771 | -0.0108 | <a href="#">LYAHNKDYK</a>   |
| 13.7  | 1150.5587 | 0.0075  | <a href="#">TQMQNMVKR</a>   |
| 13.5  | 1150.5618 | 0.0044  | <a href="#">EELLNYSQR</a>   |
| 13.5  | 1150.5982 | -0.0320 | <a href="#">IIEENYSKR</a>   |
| 13.2  | 1150.6359 | -0.0697 | <a href="#">HHPLLAPNR</a>   |
| 8.9   | 1150.4859 | 0.0803  | <a href="#">NDALACGMQR</a>  |
| 8.9   | 1150.5843 | -0.0181 | <a href="#">QADAVVGHAQR</a> |
| 8.9   | 1150.6207 | -0.0545 | <a href="#">TAQALINHQR</a>  |
| 8.9   | 1150.6571 | -0.0909 | <a href="#">VSGKIIHGGQR</a> |
| 8.9   | 1150.5995 | -0.0333 | <a href="#">YHPSLNHKR</a>   |

Mascot: <http://www.matrixscience.com/>

# MATRIX SCIENCE Mascot Search Results

## Peptide View **Spot no 40**

MS/MS Fragmentation of **LQAALSTGLFSR**

Found in **gi|297604125** in **NCBIInr**, Os05g0247100 [Oryza sativa Japonica Group]

Match to Query 20: 1262.689824 from(1263.697100,1+) intensity(0.0000) index(19)

Title: Label: B5, Spot\_Id: 219739, Peak\_List\_Id: 225586, MSMS Job\_Run\_Id: 21783, Comment:

Data file C:\Documents and Settings\Administrator\Desktop\farah BHU\spot set plate\Farah-Garima 11May 2013\ppw\_B5\_136842181400.txt

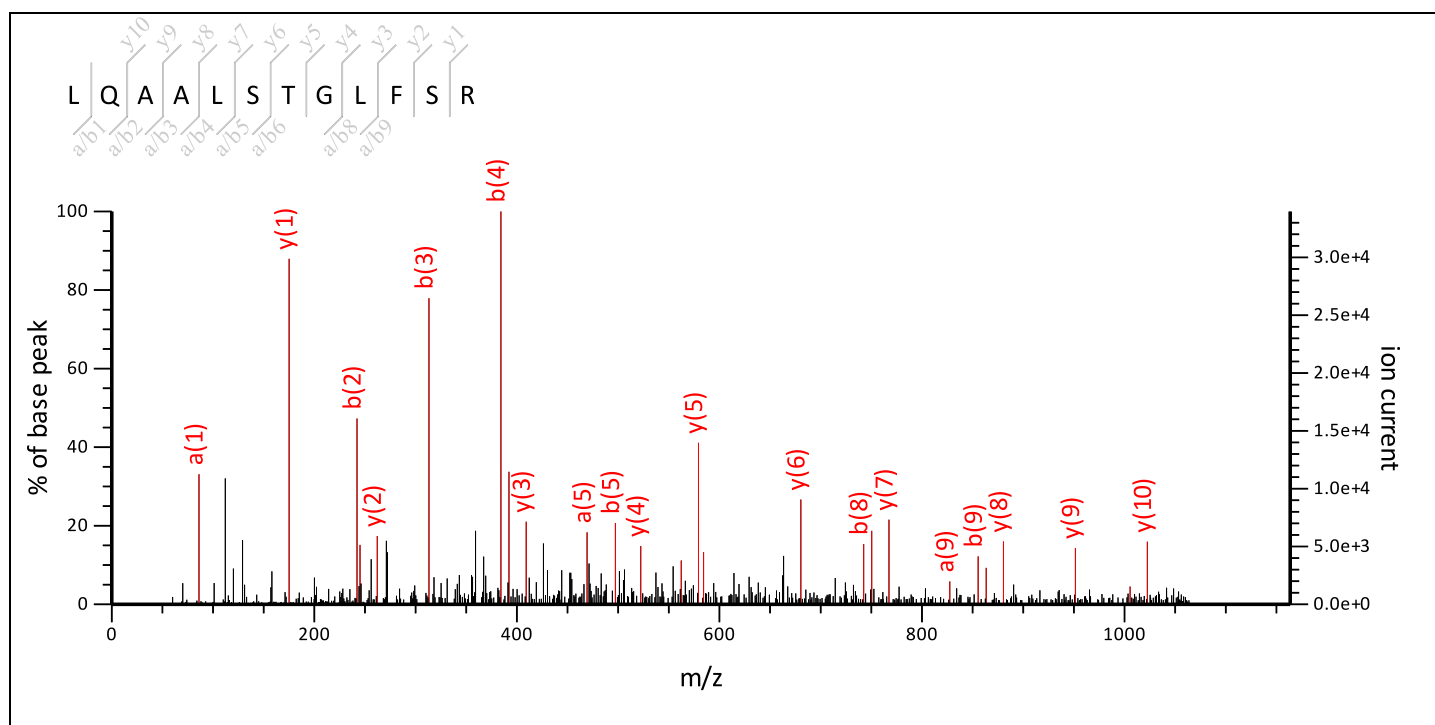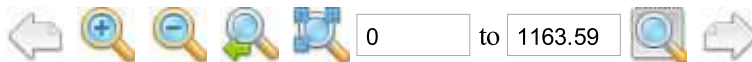

Label all possible matches  Label matches used for scoring

**Monoisotopic mass of neutral peptide Mr(calc):** 1262.6983

**Fixed modifications:** Carbamidomethyl (C) (apply to specified residues or termini only)

**Ions Score:** 93 **Expect:** 1e-06

**Matches:** 26/64 fragment ions using 33 most intense peaks ([help](#))

| # | a               | a*       | b               | b*       | Seq. | y                | y*               | #  |
|---|-----------------|----------|-----------------|----------|------|------------------|------------------|----|
| 1 | <b>86.0964</b>  |          | 114.0913        |          | L    |                  |                  | 12 |
| 2 | 214.1550        | 197.1285 | <b>242.1499</b> | 225.1234 | Q    | 1150.6215        | 1133.5950        | 11 |
| 3 | 285.1921        | 268.1656 | <b>313.1870</b> | 296.1605 | A    | <b>1022.5629</b> | <b>1005.5364</b> | 10 |
| 4 | 356.2292        | 339.2027 | <b>384.2241</b> | 367.1976 | A    | <b>951.5258</b>  | 934.4993         | 9  |
| 5 | <b>469.3133</b> | 452.2867 | <b>497.3082</b> | 480.2817 | L    | <b>880.4887</b>  | 863.4621         | 8  |
| 6 | 556.3453        | 539.3188 | <b>584.3402</b> | 567.3137 | S    | <b>767.4046</b>  | <b>750.3781</b>  | 7  |
| 7 | 657.3930        | 640.3665 | 685.3879        | 668.3614 | T    | <b>680.3726</b>  | 663.3461         | 6  |
| 8 | 714.4145        | 697.3879 | <b>742.4094</b> | 725.3828 | G    | <b>579.3249</b>  | <b>562.2984</b>  | 5  |

|    |           |           |           |           |   |          |          |   |
|----|-----------|-----------|-----------|-----------|---|----------|----------|---|
| 9  | 827.4985  | 810.4720  | 855.4934  | 838.4669  | L | 522.3035 | 505.2769 | 4 |
| 10 | 974.5669  | 957.5404  | 1002.5619 | 985.5353  | F | 409.2194 | 392.1928 | 3 |
| 11 | 1061.5990 | 1044.5724 | 1089.5939 | 1072.5673 | S | 262.1510 | 245.1244 | 2 |
| 12 |           |           |           |           | R | 175.1190 | 158.0924 | 1 |

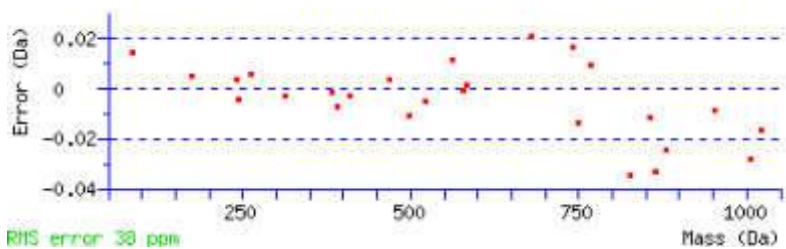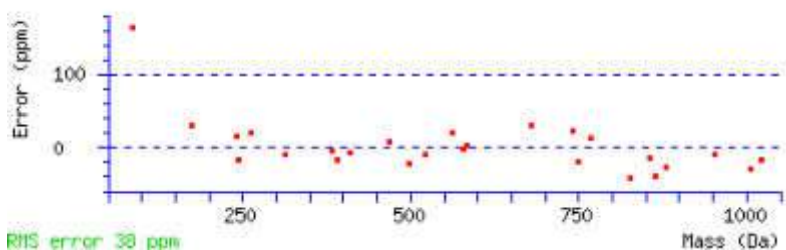

NCBI **BLAST** search of [LQAALSTGLFSR](#)

(Parameters: blastp, nr protein database, expect=20000, no filter, PAM30)

Other BLAST [web gateways](#)

#### All matches to this query

| Score | Mr(calc)  | Delta   | Sequence                      |
|-------|-----------|---------|-------------------------------|
| 93.0  | 1262.6983 | -0.0084 | <a href="#">LQAALSTGLFSR</a>  |
| 26.6  | 1262.7360 | -0.0462 | <a href="#">LGAAALWHRLR</a>   |
| 22.5  | 1262.6223 | 0.0675  | <a href="#">LRNLDMGLCR</a>    |
| 20.4  | 1262.6553 | 0.0345  | <a href="#">IKAANPEMPHR</a>   |
| 20.3  | 1262.6255 | 0.0644  | <a href="#">LAQAEAAEAAAYR</a> |
| 19.9  | 1262.7247 | -0.0349 | <a href="#">IQAAFRAFLAR</a>   |
| 18.8  | 1262.6983 | -0.0084 | <a href="#">AVAAAASYTVAIR</a> |
| 18.4  | 1262.6982 | -0.0084 | <a href="#">KGLISIENYAR</a>   |
| 17.3  | 1262.6289 | 0.0609  | <a href="#">LQSGIGEAVMSR</a>  |
| 16.4  | 1262.6553 | 0.0345  | <a href="#">LRHSLSTYMR</a>    |

Mascot: <http://www.matrixscience.com/>

# MATRIX SCIENCE Mascot Search Results

## Peptide View **Spot no 40**

MS/MS Fragmentation of **LDISGHTVSAVGPDIK**

Found in **gi|297604125** in **NCBIInr**, Os05g0247100 [Oryza sativa Japonica Group]

Match to Query 31: 1607.820524 from(1608.827800,1+) intensity(0.0000) index(30)

Title: Label: B5, Spot\_Id: 219739, Peak\_List\_Id: 225604, MSMS Job\_Run\_Id: 21783, Comment:

Data file C:\Documents and Settings\Administrator\Desktop\farah BHU\spot set plate\Farah-Garima 11May 2013\ppw\_B5\_136842181400.txt

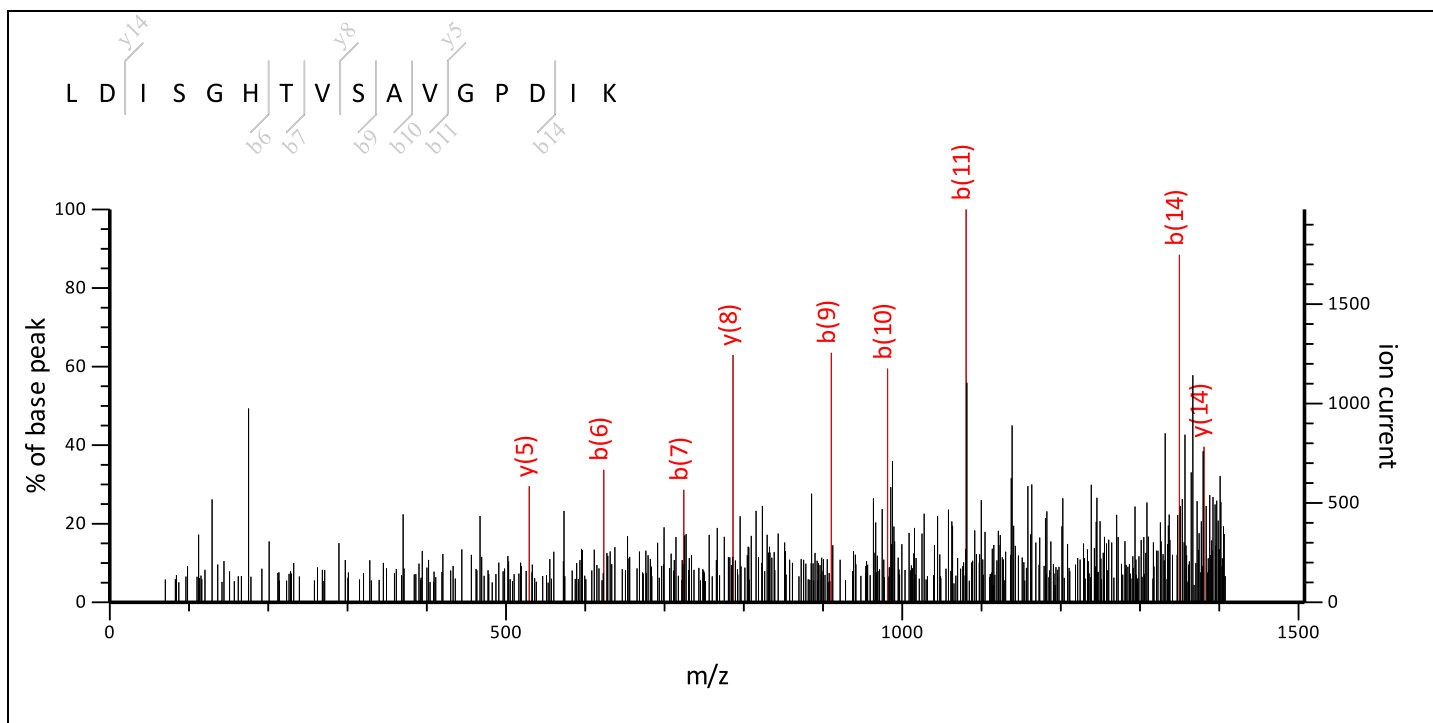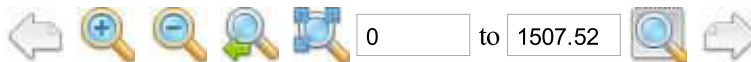

Label all possible matches  Label matches used for scoring

**Monoisotopic mass of neutral peptide Mr(calc):** 1607.8519

**Fixed modifications:** Carbamidomethyl (C) (apply to specified residues or termini only)

**Ions Score:** 34 **Expect:** 0.67

**Matches:** 9/60 fragment ions using 14 most intense peaks ([help](#))

| # | a        | b               | Seq. | y                | y*        | #  |
|---|----------|-----------------|------|------------------|-----------|----|
| 1 | 86.0964  | 114.0913        | L    |                  |           | 16 |
| 2 | 201.1234 | 229.1183        | D    | 1495.7751        | 1478.7486 | 15 |
| 3 | 314.2074 | 342.2023        | I    | <b>1380.7482</b> | 1363.7216 | 14 |
| 4 | 401.2395 | 429.2344        | S    | 1267.6641        | 1250.6375 | 13 |
| 5 | 458.2609 | 486.2558        | G    | 1180.6321        | 1163.6055 | 12 |
| 6 | 595.3198 | <b>623.3148</b> | H    | 1123.6106        | 1106.5841 | 11 |
| 7 | 696.3675 | <b>724.3624</b> | T    | 986.5517         | 969.5251  | 10 |
| 8 | 795.4359 | 823.4308        | V    | 885.5040         | 868.4775  | 9  |

|    |           |                  |          |                 |          |          |
|----|-----------|------------------|----------|-----------------|----------|----------|
| 9  | 882.4680  | <b>910.4629</b>  | <b>S</b> | <b>786.4356</b> | 769.4090 | <b>8</b> |
| 10 | 953.5051  | <b>981.5000</b>  | <b>A</b> | 699.4036        | 682.3770 | <b>7</b> |
| 11 | 1052.5735 | <b>1080.5684</b> | <b>V</b> | 628.3665        | 611.3399 | <b>6</b> |
| 12 | 1109.5949 | 1137.5899        | <b>G</b> | <b>529.2980</b> | 512.2715 | <b>5</b> |
| 13 | 1206.6477 | 1234.6426        | <b>P</b> | 472.2766        | 455.2500 | <b>4</b> |
| 14 | 1321.6747 | <b>1349.6696</b> | <b>D</b> | 375.2238        | 358.1973 | <b>3</b> |
| 15 | 1434.7587 | 1462.7536        | <b>I</b> | 260.1969        | 243.1703 | <b>2</b> |
| 16 |           |                  | <b>K</b> | 147.1128        | 130.0863 | <b>1</b> |

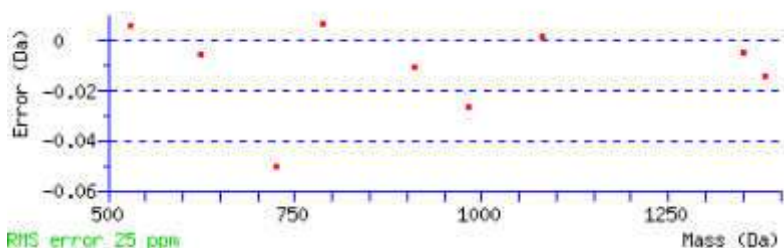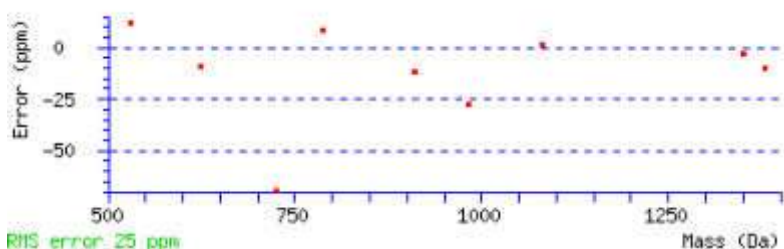

NCBI **BLAST** search of [LDISGHTVSAVGPDIK](#)

(Parameters: blastp, nr protein database, expect=20000, no filter, PAM30)

Other BLAST [web gateways](#)

#### All matches to this query

| Score | Mr(calc)  | Delta   | Sequence                          |
|-------|-----------|---------|-----------------------------------|
| 34.2  | 1607.8519 | -0.0314 | <a href="#">LDISGHTVSAVGPDIK</a>  |
| 13.5  | 1607.7210 | 0.0996  | <a href="#">RPSTSVVDESDMGGR</a>   |
| 12.8  | 1607.8128 | 0.0077  | <a href="#">RPGRGVEADGDGLPGR</a>  |
| 11.1  | 1607.8155 | 0.0050  | <a href="#">LDLKSAAYLDEGTGR</a>   |
| 10.7  | 1607.7501 | 0.0704  | <a href="#">YIPDLPSVTDEMGR</a>    |
| 8.7   | 1607.7180 | 0.1026  | <a href="#">KYMMLSMMISGPR</a>     |
| 8.7   | 1607.7097 | 0.1108  | <a href="#">QEASLLGSDEMEQR</a>    |
| 7.3   | 1607.8631 | -0.0426 | <a href="#">QVAVAAGVDAVVGEAPR</a> |
| 7.1   | 1607.8784 | -0.0579 | <a href="#">EVSVIGSGVFRFVR</a>    |
| 6.4   | 1607.8519 | -0.0313 | <a href="#">EVPPVDDADARLALK</a>   |

**Mascot:** <http://www.matrixscience.com/>

# MATRIX SCIENCE Mascot Search Results

## Peptide View **Spot no 40**

MS/MS Fragmentation of **VLVGVVASPEADRDGYVSHK**

Found in **gi|297604125** in **NCBIInr**, Os05g0247100 [Oryza sativa Japonica Group]

Match to Query 127: 2097.057224 from(2098.064500,1+) intensity(0.0000) index(34)

Title: Label: B5, Spot\_Id: 219739, Peak\_List\_Id: 225596, MSMS Job\_Run\_Id: 21783, Comment:

Data file C:\Documents and Settings\Administrator\Desktop\farah BHU\spot set plate\Farah-Garima 11May 2013\ppw\_B5\_136842181400.txt

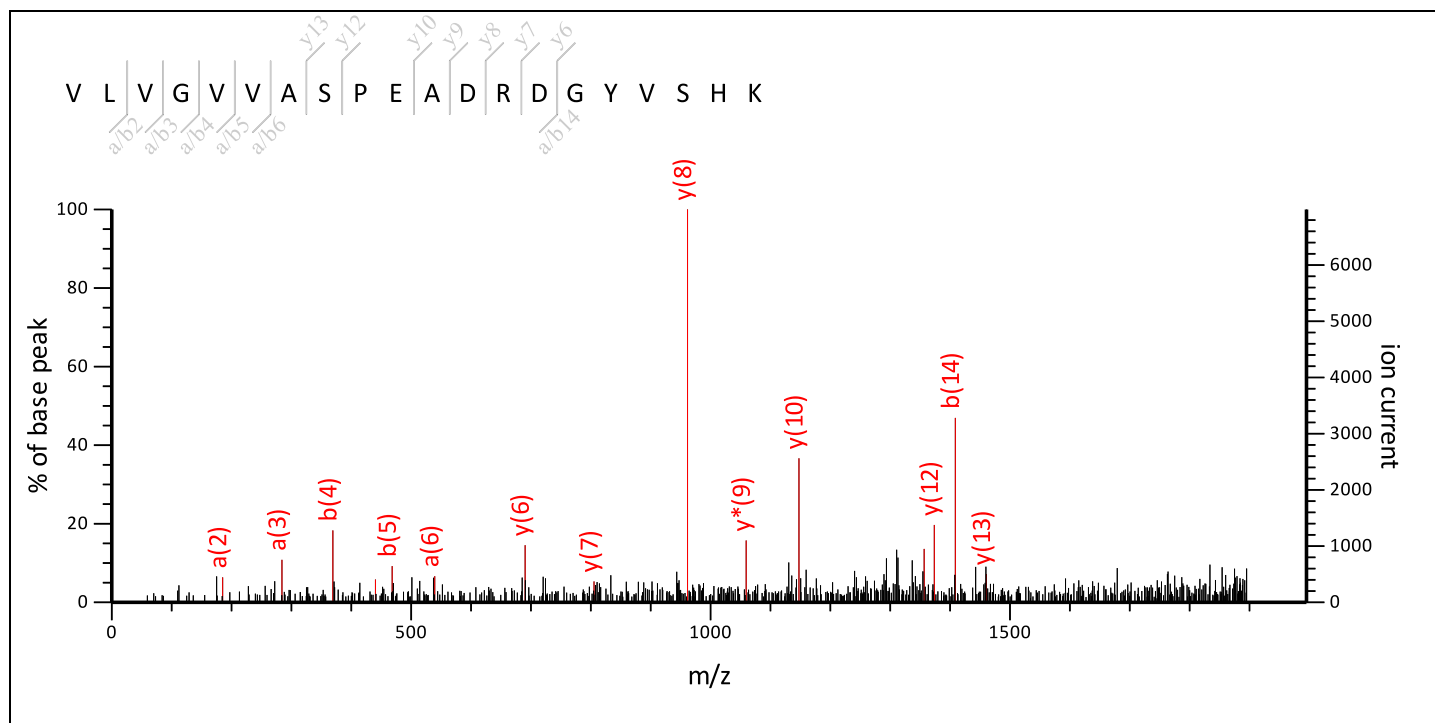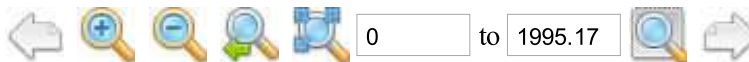

Label all possible matches  Label matches used for scoring

**Monoisotopic mass of neutral peptide Mr(calc):** 2097.0855

**Fixed modifications:** Carbamidomethyl (C) (apply to specified residues or termini only)

**Ions Score:** 25 **Expect:** 5

**Matches :** 16/90 fragment ions using 38 most intense peaks ([help](#))

| # | a               | a* | b               | b* | Seq. | y                | y*        | #  |
|---|-----------------|----|-----------------|----|------|------------------|-----------|----|
| 1 | 72.0808         |    | 100.0757        |    | V    |                  |           | 20 |
| 2 | <b>185.1648</b> |    | 213.1598        |    | L    | 1999.0243        | 1981.9978 | 19 |
| 3 | <b>284.2333</b> |    | 312.2282        |    | V    | 1885.9403        | 1868.9137 | 18 |
| 4 | 341.2547        |    | <b>369.2496</b> |    | G    | 1786.8719        | 1769.8453 | 17 |
| 5 | <b>440.3231</b> |    | <b>468.3180</b> |    | V    | 1729.8504        | 1712.8238 | 16 |
| 6 | <b>539.3915</b> |    | 567.3865        |    | V    | 1630.7820        | 1613.7554 | 15 |
| 7 | 610.4287        |    | 638.4236        |    | A    | 1531.7136        | 1514.6870 | 14 |
| 8 | 697.4607        |    | 725.4556        |    | S    | <b>1460.6764</b> | 1443.6499 | 13 |



|    |           |           |                  |           |   |                  |                  |    |
|----|-----------|-----------|------------------|-----------|---|------------------|------------------|----|
| 9  | 794.5135  |           | 822.5084         |           | P | <b>1373.6444</b> | <b>1356.6179</b> | 12 |
| 10 | 923.5560  |           | 951.5510         |           | E | 1276.5917        | 1259.5651        | 11 |
| 11 | 994.5932  |           | 1022.5881        |           | A | <b>1147.5491</b> | 1130.5225        | 10 |
| 12 | 1109.6201 |           | 1137.6150        |           | D | 1076.5119        | <b>1059.4854</b> | 9  |
| 13 | 1265.7212 | 1248.6947 | 1293.7161        | 1276.6896 | R | <b>961.4850</b>  | 944.4585         | 8  |
| 14 | 1380.7482 | 1363.7216 | <b>1408.7431</b> | 1391.7165 | D | <b>805.3839</b>  | 788.3573         | 7  |
| 15 | 1437.7696 | 1420.7431 | 1465.7645        | 1448.7380 | G | <b>690.3570</b>  | 673.3304         | 6  |
| 16 | 1600.8329 | 1583.8064 | 1628.8279        | 1611.8013 | Y | 633.3355         | 616.3089         | 5  |
| 17 | 1699.9014 | 1682.8748 | 1727.8963        | 1710.8697 | V | 470.2722         | 453.2456         | 4  |
| 18 | 1786.9334 | 1769.9068 | 1814.9283        | 1797.9018 | S | 371.2037         | 354.1772         | 3  |
| 19 | 1923.9923 | 1906.9658 | 1951.9872        | 1934.9607 | H | <b>284.1717</b>  | 267.1452         | 2  |
| 20 |           |           |                  |           | K | 147.1128         | 130.0863         | 1  |

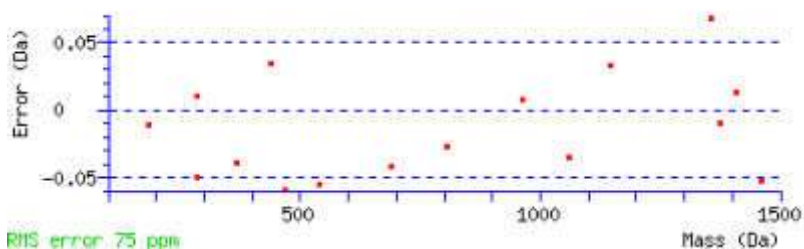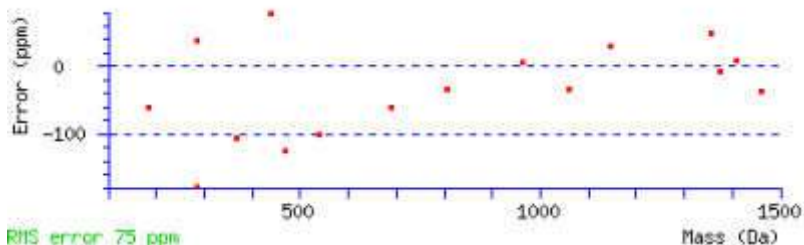

NCBI BLAST search of [VLVGVVASPEADRDGYVSHK](#)

(Parameters: blastp, nr protein database, expect=20000, no filter, PAM30)

Other BLAST [web gateways](#)

#### All matches to this query

| Score | Mr(calc)  | Delta   | Sequence                             |
|-------|-----------|---------|--------------------------------------|
| 24.5  | 2097.0855 | -0.0283 | <a href="#">VLVGVVASPEADRDGYVSHK</a> |
| 5.3   | 2097.0789 | -0.0217 | <a href="#">SLMLVHRLLDGDSSFHR</a>    |
| 2.1   | 2097.0288 | 0.0284  | <a href="#">DPALAHCIPMQLHFLYR</a>    |
| 0.8   | 2096.9440 | 0.1133  | <a href="#">WGIPPSTPDWGADDEELGR</a>  |

Mascot: <http://www.matrixscience.com/>


**Mascot Search Results**
**Peptide View Spot no 50**
**MS/MS Fragmentation of YRPKEPYTGR**

 Found in [gi41052915](#) in [NCBI Inr](#), putative ferredoxin-NADP(H) oxidoreductase [Oryza sativa Japonica Group]

Match to Query 20: 1265.645424 from(1266.652700,1+) intensity(0.0000) index(8)

Title: Label: L3, Spot\_Id: 219717, Peak\_List\_Id: 225433, MSMS Job\_Run\_Id: 21778, Comment:

Data file C:\Documents and Settings\Administrator\Desktop\farah BHU\spot set plate\Farah-Garima 11May 2013\ppw\_L3\_136842146000.txt

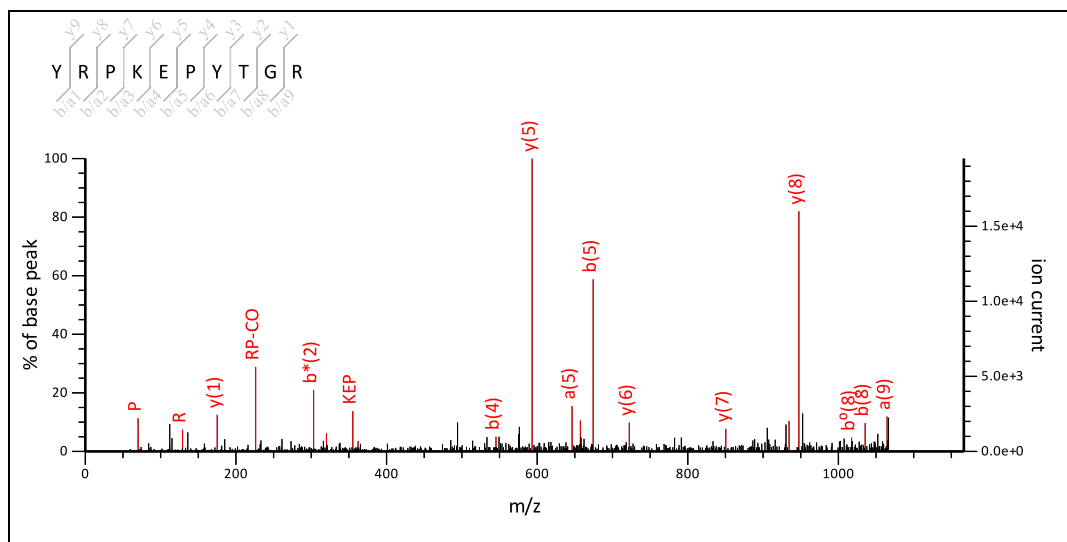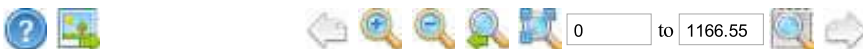
 Label all possible matches  Label matches used for scoring 

Monoisotopic mass of neutral peptide Mr(calc): 1265.6516

Fixed modifications: Carbamidomethyl (C) (apply to specified residues or termini only)

Ions Score: 33 Expect: 1.1

 Matches : 25/150 fragment ions using 33 most intense peaks ([help](#))

| #  | Immon.   | a         | a*        | a <sup>0</sup> | b         | b*        | b <sup>0</sup> | d        | d'       | Seq. | v         | w         | w'       | y         | y*        | y     |
|----|----------|-----------|-----------|----------------|-----------|-----------|----------------|----------|----------|------|-----------|-----------|----------|-----------|-----------|-------|
| 1  | 136.0757 | 136.0757  |           |                | 164.0706  |           |                | 44.0495  |          | Y    |           |           |          |           |           |       |
| 2  | 129.1135 | 292.1768  | 275.1503  |                | 320.1717  | 303.1452  |                | 207.1128 |          | R    | 1002.5003 | 1001.5051 |          | 1103.5956 | 1086.5691 | 1085. |
| 3  | 70.0651  | 389.2296  | 372.2030  |                | 417.2245  | 400.1979  |                | 363.2139 |          | P    | 905.4476  | 904.4523  |          | 947.4945  | 930.4680  | 929.  |
| 4  | 101.1073 | 517.3245  | 500.2980  |                | 545.3194  | 528.2929  |                | 460.2667 |          | K    | 777.3526  | 776.3573  |          | 850.4417  | 833.4152  | 832.  |
| 5  | 102.0550 | 646.3671  | 629.3406  | 628.3566       | 674.3620  | 657.3355  | 656.3515       | 588.3616 |          | E    | 648.3100  | 647.3148  |          | 722.3468  | 705.3202  | 704.  |
| 6  | 70.0651  | 743.4199  | 726.3933  | 725.4093       | 771.4148  | 754.3883  | 753.4042       | 717.4042 |          | P    | 551.2572  | 550.2620  |          | 593.3042  | 576.2776  | 575.  |
| 7  | 136.0757 | 906.4832  | 889.4567  | 888.4726       | 934.4781  | 917.4516  | 916.4676       |          |          | Y    | 388.1939  |           |          | 496.2514  | 479.2249  | 478.  |
| 8  | 74.0600  | 1007.5309 | 990.5043  | 989.5203       | 1035.5258 | 1018.4993 | 1017.5152      | 991.5360 | 993.5152 | T    | 287.1462  | 300.1666  | 302.1459 | 333.1881  | 316.1615  | 315.  |
| 9  | 30.0338  | 1064.5524 | 1047.5258 | 1046.5418      | 1092.5473 | 1075.5207 | 1074.5367      |          |          | G    |           |           |          | 232.1404  | 215.1139  |       |
| 10 | 129.1135 |           |           |                |           |           |                |          |          | R    | 74.0237   | 73.0284   |          | 175.1190  | 158.0924  |       |

| Seq   | ya       | yb       | Seq    | ya       | yb       | Seq    | ya       | yb       |
|-------|----------|----------|--------|----------|----------|--------|----------|----------|
| RP    | 226.1662 | 254.1612 | RPK    | 354.2612 | 382.2561 | RPKE   | 483.3038 | 511.2987 |
| RPKEP | 580.3566 | 608.3515 | PK     | 198.1601 | 226.1550 | PKE    | 327.2027 | 355.1976 |
| PKEP  | 424.2554 | 452.2504 | PKEPY  | 587.3188 | 615.3137 | PKEPYT | 688.3665 | 716.3614 |
| KE    | 230.1499 | 258.1448 | KEP    | 327.2027 | 355.1976 | KEPY   | 490.2660 | 518.2609 |
| KEPYT | 591.3137 | 619.3086 | KEPYTG | 648.3352 | 676.3301 | EP     | 199.1077 | 227.1026 |
| EPY   | 362.1710 | 390.1660 | EPYT   | 463.2187 | 491.2136 | EPYTG  | 520.2402 | 548.2351 |
| PY    | 233.1285 | 261.1234 | PYT    | 334.1761 | 362.1710 | PYTG   | 391.1976 | 419.1925 |
| YT    | 237.1234 | 265.1183 | YTG    | 294.1448 | 322.1397 | TG     | 131.0815 | 159.0764 |

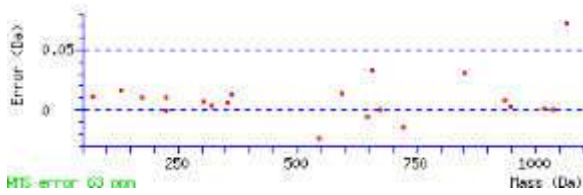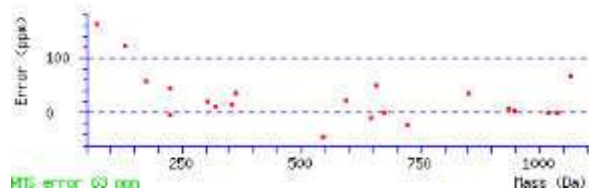

NCBI BLAST search of [YRPKEPYTGR](#)

(Parameters: blastp, nr protein database, expect=20000, no filter, PAM30)

Other BLAST [web gateways](#)

**All matches to this query**

| Score | Mr(calc)  | Delta   | Sequence                        |
|-------|-----------|---------|---------------------------------|
| 32.9  | 1265.6516 | -0.0062 | <a href="#">YRPKEPYTGR</a>      |
| 19.7  | 1265.6000 | 0.0454  | <a href="#">EANSFATSVGAGR</a>   |
| 16.3  | 1265.5888 | 0.0566  | <a href="#">SDNFEEKNGVK</a>     |
| 16.1  | 1265.5968 | 0.0486  | <a href="#">TMAGRAAASMAGR</a>   |
| 15.5  | 1265.5960 | 0.0494  | <a href="#">SNSTGSSSKQQR</a>    |
| 15.4  | 1265.6113 | 0.0342  | <a href="#">SGSGAGAPGPPQAGR</a> |
| 15.2  | 1265.5524 | 0.0930  | <a href="#">DAADTAEVFGDR</a>    |
| 15.1  | 1265.6364 | 0.0090  | <a href="#">RTYTAEIQR</a>       |
| 15.1  | 1265.6802 | -0.0348 | <a href="#">SGGIMVLTFIGR</a>    |
| 15.0  | 1265.6108 | 0.0346  | <a href="#">DAVMKEMATVR</a>     |

Mascot: <http://www.matrixscience.com/>

**MATRIX SCIENCE Mascot Search Results**

**Peptide View Spot no 50**

MS/MS Fragmentation of **LVYTNDQGEIVK**

Found in **gi41052915** in **NCBI**nr, putative ferredoxin-NADP(H) oxidoreductase [Oryza sativa Japonica Group]

Match to Query 28: 1377.684424 from(1378.691700,1+) intensity(0.0000) index(11)

Title: Label: L3, Spot\_Id: 219717, Peak\_List\_Id: 225437, MSMS Job\_Run\_Id: 21778, Comment:

Data file C:\Documents and Settings\Administrator\Desktop\farah BHU\spot set plate\Farah-Garima 11May 2013\ppw\_L3\_136842146000.txt

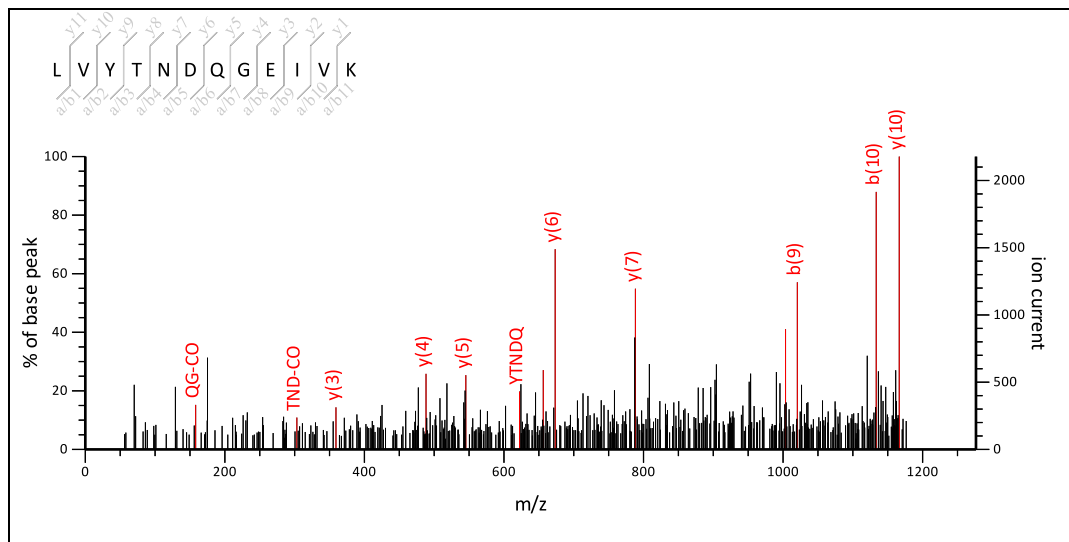

Navigation icons: Home, Back, Forward, Search, and a range input field from 0 to 1276.49.

Label all possible matches  Label matches used for scoring

Monoisotopic mass of neutral peptide Mr(calc): 1377.7140

Fixed modifications: Carbamidomethyl (C) (apply to specified residues or termini only)

Ions Score: 42 Expect: 0.15

Matches : 17/195 fragment ions using 24 most intense peaks [\(help\)](#)

| #  | Immon.   | a         | a*        | a <sup>0</sup> | b         | b*        | b <sup>0</sup> | d         | d'        | Seq. | v         | w         | w'       | y         | y*        |
|----|----------|-----------|-----------|----------------|-----------|-----------|----------------|-----------|-----------|------|-----------|-----------|----------|-----------|-----------|
| 1  | 86.0964  | 86.0964   |           |                | 114.0913  |           |                | 44.0495   |           | L    |           |           |          |           |           |
| 2  | 72.0808  | 185.1648  |           |                | 213.1598  |           |                | 171.1492  |           | V    | 1221.5746 | 1234.5950 |          | 1265.6372 | 1248.6107 |
| 3  | 136.0757 | 348.2282  |           |                | 376.2231  |           |                |           |           | Y    | 1058.5113 |           |          | 1166.5688 | 1149.5422 |
| 4  | 74.0600  | 449.2758  |           | 431.2653       | 477.2708  |           | 459.2602       | 433.2809  | 435.2602  | T    | 957.4636  | 970.4840  | 972.4633 | 1003.5055 | 986.4789  |
| 5  | 87.0553  | 563.3188  | 546.2922  | 545.3082       | 591.3137  | 574.2871  | 573.3031       | 520.3130  |           | N    | 843.4207  | 842.4254  |          | 902.4578  | 885.4312  |
| 6  | 88.0393  | 678.3457  | 661.3192  | 660.3352       | 706.3406  | 689.3141  | 688.3301       | 634.3559  |           | D    | 728.3937  | 727.3985  |          | 788.4149  | 771.3883  |
| 7  | 101.0709 | 806.4043  | 789.3777  | 788.3937       | 834.3992  | 817.3727  | 816.3886       | 749.3828  |           | Q    | 600.3352  | 599.3399  |          | 673.3879  | 656.3614  |
| 8  | 30.0338  | 863.4258  | 846.3992  | 845.4152       | 891.4207  | 874.3941  | 873.4101       |           |           | G    |           |           |          | 545.3293  | 528.3028  |
| 9  | 102.0550 | 992.4684  | 975.4418  | 974.4578       | 1020.4633 | 1003.4367 | 1002.4527      | 934.4629  |           | E    | 414.2711  | 413.2758  |          | 488.3079  | 471.2813  |
| 10 | 86.0964  | 1105.5524 | 1088.5259 | 1087.5419      | 1133.5473 | 1116.5208 | 1115.5368      | 1077.5211 | 1091.5368 | I    | 301.1870  | 314.2074  | 328.2231 | 359.2653  | 342.2387  |
| 11 | 72.0808  | 1204.6208 | 1187.5943 | 1186.6103      | 1232.6157 | 1215.5892 | 1214.6052      | 1190.6052 |           | V    | 202.1186  | 215.1390  |          | 246.1812  | 229.1547  |
| 12 | 101.1073 |           |           |                |           |           |                |           |           | K    | 74.0237   | 73.0284   |          | 147.1128  | 130.0863  |

| Seq    | ya       | yb       | Seq    | ya       | yb       | Seq    | ya       | yb       |
|--------|----------|----------|--------|----------|----------|--------|----------|----------|
| VY     | 235.1441 | 263.1390 | VYT    | 336.1918 | 364.1867 | VYTN   | 450.2347 | 478.2296 |
| VYTND  | 565.2617 | 593.2566 | VYTNDQ | 693.3202 | 721.3151 | YT     | 237.1234 | 265.1183 |
| YTN    | 351.1663 | 379.1612 | YTND   | 466.1932 | 494.1882 | YTNDQ  | 594.2518 | 622.2467 |
| YTNDQG | 651.2733 | 679.2682 | TN     | 188.1030 | 216.0979 | TND    | 303.1299 | 331.1248 |
| TNDQ   | 431.1885 | 459.1834 | TNDQG  | 488.2100 | 516.2049 | TNDQGE | 617.2525 | 645.2475 |
| ND     | 202.0822 | 230.0771 | NDQ    | 330.1408 | 358.1357 | NDQG   | 387.1623 | 415.1572 |
| NDQGE  | 516.2049 | 544.1998 | NDQGEI | 629.2889 | 657.2838 | DQ     | 216.0979 | 244.0928 |
| DQG    | 273.1193 | 301.1143 | DQGE   | 402.1619 | 430.1569 | DQGEI  | 515.2460 | 543.2409 |
| DQGEIV | 614.3144 | 642.3093 | QG     | 158.0924 | 186.0873 | QGE    | 287.1350 | 315.1299 |

|             |          |          |              |          |          |           |          |          |
|-------------|----------|----------|--------------|----------|----------|-----------|----------|----------|
| <b>QGEI</b> | 400.2191 | 428.2140 | <b>QGEIV</b> | 499.2875 | 527.2824 | <b>GE</b> | 159.0764 | 187.0713 |
| <b>GEI</b>  | 272.1605 | 300.1554 | <b>GEIV</b>  | 371.2289 | 399.2238 | <b>EI</b> | 215.1390 | 243.1339 |
| <b>EIV</b>  | 314.2074 | 342.2023 | <b>IV</b>    | 185.1648 | 213.1598 |           |          |          |

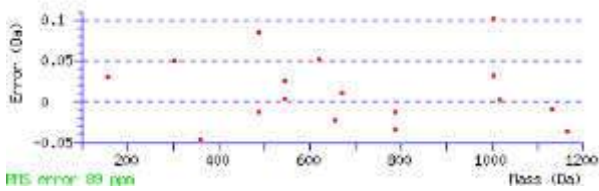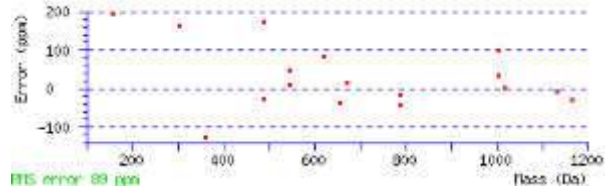

NCBI BLAST search of [LVYTNDQGEIVK](#)

(Parameters: blastp, nr protein database, expect=20000, no filter, PAM30)

Other BLAST [web gateways](#)

#### All matches to this query

| Score | Mr(calc)  | Delta   | Sequence                          |
|-------|-----------|---------|-----------------------------------|
| 41.6  | 1377.7504 | -0.0659 | <a href="#">LVYTNDKGEIVK</a>      |
| 41.6  | 1377.7504 | -0.0659 | <a href="#">LVYTNDKGELVK</a>      |
| 41.6  | 1377.7140 | -0.0296 | <a href="#">LVYTNDQGEIVK</a>      |
| 25.9  | 1377.7140 | -0.0295 | <a href="#">LVYTNENGEIVK</a>      |
| 25.9  | 1377.7140 | -0.0295 | <a href="#">LVYTNENGELVK</a>      |
| 19.9  | 1377.6345 | 0.0499  | <a href="#">AGGGSGSAGRSGGSSAR</a> |
| 18.8  | 1377.6922 | -0.0078 | <a href="#">TTLAEGKAVDAMR</a>     |
| 17.3  | 1377.7252 | -0.0408 | <a href="#">QTEESLQLEKR</a>       |
| 16.5  | 1377.6380 | 0.0464  | <a href="#">MADAADMKADLAR</a>     |
| 15.2  | 1377.6711 | 0.0133  | <a href="#">VLDFCAEAGIGAR</a>     |

Mascot: <http://www.matrixscience.com/>

**MATRIX SCIENCE Mascot Search Results**

**Peptide View Spot no 50**

MS/MS Fragmentation of **RLVYTNDQGEIVK**

Found in **gi41052915** in **NCBI nr**, putative ferredoxin-NADP(H) oxidoreductase [Oryza sativa Japonica Group]

Match to Query 30: 1533.810024 from(1534.817300,1+) intensity(0.0000) index(12)

Title: Label: L3, Spot\_Id: 219717, Peak\_List\_Id: 225436, MSMS Job\_Run\_Id: 21778, Comment:

Data file C:\Documents and Settings\Administrator\Desktop\farah BHU\spot set plate\Farah-Garima 11May 2013\ppw\_L3\_136842146000.txt

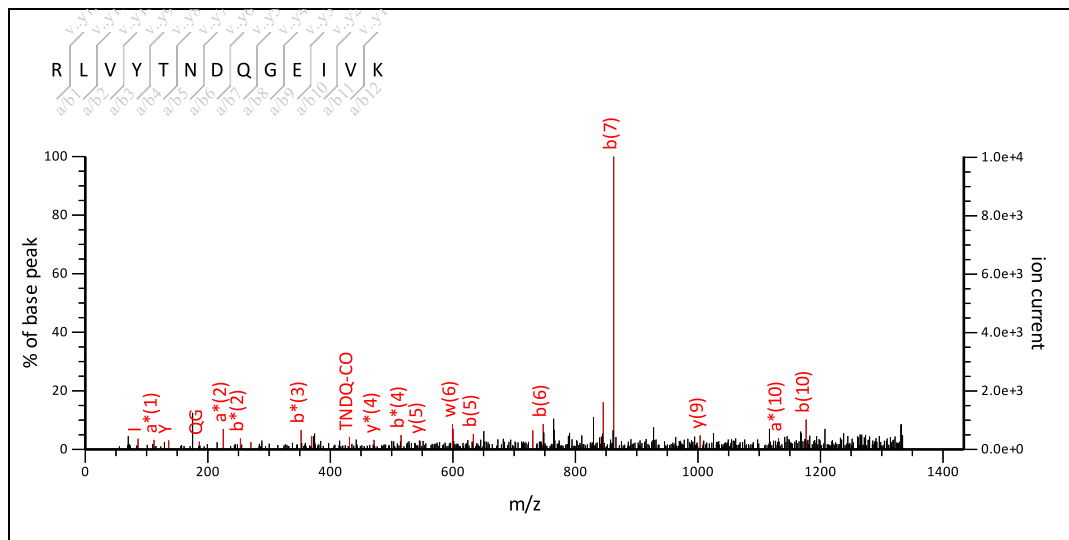

Navigation icons: Home, Back, Forward, Search, Print, Refresh. Range: 0 to 1433.98

Label all possible matches  Label matches used for scoring

Monoisotopic mass of neutral peptide Mr(calc): 1533.8151

Fixed modifications: Carbamidomethyl (C) (apply to specified residues or termini only)

Ions Score: 17 Expect: 35

Matches : 25/223 fragment ions using 52 most intense peaks [\(help\)](#)

| #  | Immon.   | a         | a*        | a <sup>0</sup> | b         | b*        | b <sup>0</sup> | d         | d'        | Seq. | v         | w         | w'       | y         | y*        |
|----|----------|-----------|-----------|----------------|-----------|-----------|----------------|-----------|-----------|------|-----------|-----------|----------|-----------|-----------|
| 1  | 129.1135 | 129.1135  | 112.0869  |                | 157.1084  | 140.0818  |                | 44.0495   |           | R    |           |           |          |           |           |
| 2  | 86.0964  | 242.1975  | 225.1710  |                | 270.1925  | 253.1659  |                | 200.1506  |           | L    | 1320.6430 | 1319.6478 |          | 1378.7213 | 1361.6947 |
| 3  | 72.0808  | 341.2660  | 324.2394  |                | 369.2609  | 352.2343  |                | 327.2503  |           | V    | 1221.5746 | 1234.5950 |          | 1265.6372 | 1248.6107 |
| 4  | 136.0757 | 504.3293  | 487.3027  |                | 532.3242  | 515.2976  |                |           |           | Y    | 1058.5113 |           |          | 1166.5688 | 1149.5422 |
| 5  | 74.0600  | 605.3770  | 588.3504  | 587.3664       | 633.3719  | 616.3453  | 615.3613       | 589.3820  | 591.3613  | T    | 957.4636  | 970.4840  | 972.4633 | 1003.5055 | 986.4789  |
| 6  | 87.0553  | 719.4199  | 702.3933  | 701.4093       | 747.4148  | 730.3883  | 729.4042       | 676.4141  |           | N    | 843.4207  | 842.4254  |          | 902.4578  | 885.4312  |
| 7  | 88.0393  | 834.4468  | 817.4203  | 816.4363       | 862.4417  | 845.4152  | 844.4312       | 790.4570  |           | D    | 728.3937  | 727.3985  |          | 788.4149  | 771.3883  |
| 8  | 101.0709 | 962.5054  | 945.4789  | 944.4948       | 990.5003  | 973.4738  | 972.4898       | 905.4839  |           | Q    | 600.3352  | 599.3399  |          | 673.3879  | 656.3614  |
| 9  | 30.0338  | 1019.5269 | 1002.5003 | 1001.5163      | 1047.5218 | 1030.4952 | 1029.5112      |           |           | G    |           |           |          | 545.3293  | 528.3028  |
| 10 | 102.0550 | 1148.5695 | 1131.5429 | 1130.5589      | 1176.5644 | 1159.5378 | 1158.5538      | 1090.5640 |           | E    | 414.2711  | 413.2758  |          | 488.3079  | 471.2813  |
| 11 | 86.0964  | 1261.6535 | 1244.6270 | 1243.6430      | 1289.6484 | 1272.6219 | 1271.6379      | 1233.6222 | 1247.6379 | I    | 301.1870  | 314.2074  | 328.2231 | 359.2653  | 342.2387  |
| 12 | 72.0808  | 1360.7219 | 1343.6954 | 1342.7114      | 1388.7169 | 1371.6903 | 1370.7063      | 1346.7063 |           | V    | 202.1186  | 215.1390  |          | 246.1812  | 229.1547  |
| 13 | 101.1073 |           |           |                |           |           |                |           |           | K    | 74.0237   | 73.0284   |          | 147.1128  | 130.0863  |

| Seq    | ya       | yb       | Seq    | ya       | yb       | Seq    | ya       | yb       |
|--------|----------|----------|--------|----------|----------|--------|----------|----------|
| LV     | 185.1648 | 213.1598 | LVY    | 348.2282 | 376.2231 | LVYT   | 449.2758 | 477.2708 |
| LVYTN  | 563.3188 | 591.3137 | LVYTND | 678.3457 | 706.3406 | VY     | 235.1441 | 263.1390 |
| VYT    | 336.1918 | 364.1867 | VYTN   | 450.2347 | 478.2296 | VYTND  | 565.2617 | 593.2566 |
| VYTNDQ | 693.3202 | 721.3151 | YT     | 237.1234 | 265.1183 | YTN    | 351.1663 | 379.1612 |
| YTND   | 466.1932 | 494.1882 | YTNDQ  | 594.2518 | 622.2467 | YTNDQG | 651.2733 | 679.2682 |
| TN     | 188.1030 | 216.0979 | TND    | 303.1299 | 331.1248 | TNDQ   | 431.1885 | 459.1834 |
| TNDQG  | 488.2100 | 516.2049 | TNDQGE | 617.2525 | 645.2475 | ND     | 202.0822 | 230.0771 |
| NDQ    | 330.1408 | 358.1357 | NDQG   | 387.1623 | 415.1572 | NDQGE  | 516.2049 | 544.1998 |

|        |          |          |       |          |          |        |          |          |
|--------|----------|----------|-------|----------|----------|--------|----------|----------|
| NDQGEI | 629.2889 | 657.2838 | DQ    | 216.0979 | 244.0928 | DQG    | 273.1193 | 301.1143 |
| DQGE   | 402.1619 | 430.1569 | DQGEI | 515.2460 | 543.2409 | DQGEIV | 614.3144 | 642.3093 |
| QG     | 158.0924 | 186.0873 | QGE   | 287.1350 | 315.1299 | QGEI   | 400.2191 | 428.2140 |
| QGEIV  | 499.2875 | 527.2824 | GE    | 159.0764 | 187.0713 | GEI    | 272.1605 | 300.1554 |
| GEIV   | 371.2289 | 399.2238 | EI    | 215.1390 | 243.1339 | EIV    | 314.2074 | 342.2023 |
| IV     | 185.1648 | 213.1598 |       |          |          |        |          |          |

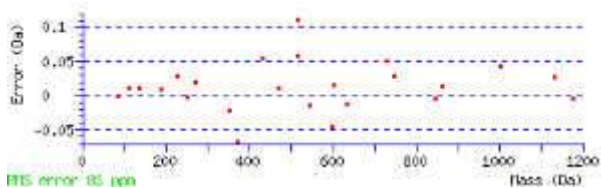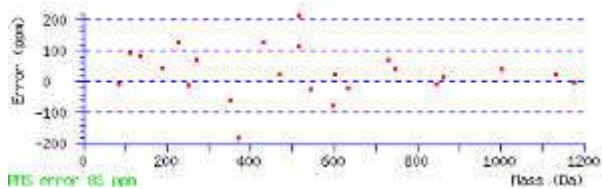

NCBI BLAST search of [RLVYTNDQGEIVK](#)

(Parameters: blastp, nr protein database, expect=20000, no filter, PAM30)

Other BLAST [web gateways](#)

#### All matches to this query

| Score | Mr(calc)  | Delta   | Sequence                        |
|-------|-----------|---------|---------------------------------|
| 17.4  | 1533.8151 | -0.0051 | <a href="#">RLVYTNDQGEIVK</a>   |
| 10.0  | 1533.8627 | -0.0527 | <a href="#">ILOHTPDKSINLR</a>   |
| 9.9   | 1533.8159 | -0.0059 | <a href="#">WTNITGAMKILMR</a>   |
| 9.8   | 1533.7722 | 0.0379  | <a href="#">LARAFGGDAMDAALR</a> |
| 9.7   | 1533.8047 | 0.0053  | <a href="#">VLELAEPNMTMIR</a>   |
| 9.3   | 1533.7205 | 0.0895  | <a href="#">VANGTLAPNSMSSNR</a> |
| 9.1   | 1533.8012 | 0.0089  | <a href="#">EFORTISSARPSR</a>   |
| 9.0   | 1533.7271 | 0.0829  | <a href="#">SSSVSQPDSSPTVTR</a> |
| 8.8   | 1533.7254 | 0.0846  | <a href="#">YMFTMACGRLIR</a>    |
| 8.7   | 1533.7874 | 0.0226  | <a href="#">ALAWWMSASRALR</a>   |

Mascot: <http://www.matrixscience.com/>




**Mascot Search Results**
**Peptide View Spot no 50**
**MS/MS Fragmentation of LYSIASSAIGDFADSK**

 Found in gi|41052915 in **NCBI**nr, putative ferredoxin-NADP(H) oxidoreductase [Oryza sativa Japonica Group]

Match to Query 32: 1643.778324 from(1644.785600,1+) intensity(0.0000) index(13)

Title: Label: L3, Spot\_Id: 219717, Peak\_List\_Id: 225444, MSMS Job\_Run\_Id: 21778, Comment:

Data file C:\Documents and Settings\Administrator\Desktop\farah BHU\spot set plate\Farah-Garima 11May 2013\ppw\_L3\_136842146000.txt

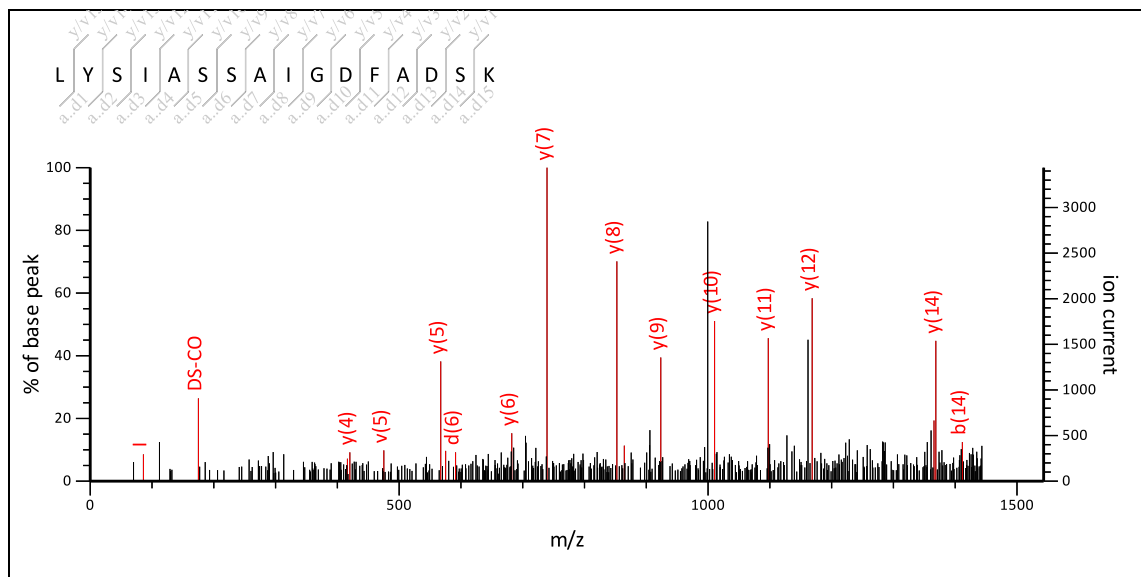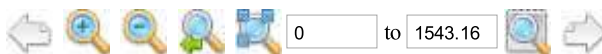
 Label all possible matches  Label matches used for scoring 
**Monoisotopic mass of neutral peptide Mr(calc):** 1643.8042

**Fixed modifications:** Carbamidomethyl (C) (apply to specified residues or termini only)

**Ions Score:** 70 **Expect:** 0.0002

**Matches:** 26/280 fragment ions using 28 most intense peaks ([help](#))

| #  | Immon.   | a         | a <sup>0</sup>                             | b                                          | b <sup>0</sup> | d                                         | d <sup>t</sup>                            | Seq. | v                                         | w         | w <sup>t</sup> | y                                          | y <sup>*</sup> | y <sup>0</sup> | #  |
|----|----------|-----------|--------------------------------------------|--------------------------------------------|----------------|-------------------------------------------|-------------------------------------------|------|-------------------------------------------|-----------|----------------|--------------------------------------------|----------------|----------------|----|
| 1  | 86.0964  | 86.0964   |                                            | 114.0913                                   |                | 44.0495                                   |                                           | L    |                                           |           |                |                                            |                |                | 16 |
| 2  | 136.0757 | 249.1598  |                                            | 277.1547                                   |                |                                           |                                           | Y    | 1423.6700                                 |           |                | 1531.7275                                  | 1514.7009      | 1513.7169      | 15 |
| 3  | 60.0444  | 336.1918  | 318.1812                                   | 364.1867                                   | 346.1761       | 320.1969                                  |                                           | S    | 1336.6379                                 | 1335.6427 |                | <span style="color: red;">1368.6642</span> | 1351.6376      | 1350.6536      | 14 |
| 4  | 86.0964  | 449.2758  | 431.2653                                   | 477.2708                                   | 459.2602       | 421.2445                                  | 435.2602                                  | I    | 1223.5539                                 | 1236.5743 | 1250.5899      | 1281.6321                                  | 1264.6056      | 1263.6216      | 13 |
| 5  | 44.0495  | 520.3130  | 502.3024                                   | 548.3079                                   | 530.2973       |                                           |                                           | A    | 1152.5168                                 |           |                | <span style="color: red;">1168.5481</span> | 1151.5215      | 1150.5375      | 12 |
| 6  | 60.0444  | 607.3450  | 589.3344                                   | 635.3399                                   | 617.3293       | <span style="color: red;">591.3501</span> |                                           | S    | 1065.4847                                 | 1064.4895 |                | <span style="color: red;">1097.5109</span> | 1080.4844      | 1079.5004      | 11 |
| 7  | 60.0444  | 694.3770  | 676.3665                                   | 722.3719                                   | 704.3614       | 678.3821                                  |                                           | S    | 978.4527                                  | 977.4575  |                | <span style="color: red;">1010.4789</span> | 993.4524       | 992.4684       | 10 |
| 8  | 44.0495  | 765.4141  | 747.4036                                   | 793.4090                                   | 775.3985       |                                           |                                           | A    | 907.4156                                  |           |                | <span style="color: red;">923.4469</span>  | 906.4203       | 905.4363       | 9  |
| 9  | 86.0964  | 878.4982  | 860.4876                                   | 906.4931                                   | 888.4825       | 850.4669                                  | <span style="color: red;">864.4825</span> | I    | 794.3315                                  | 807.3519  | 821.3676       | <span style="color: red;">852.4098</span>  | 835.3832       | 834.3992       | 8  |
| 10 | 30.0338  | 935.5197  | 917.5091                                   | 963.5146                                   | 945.5040       |                                           |                                           | G    |                                           |           |                | <span style="color: red;">739.3257</span>  | 722.2992       | 721.3151       | 7  |
| 11 | 88.0393  | 1050.5466 | 1032.5360                                  | 1078.5415                                  | 1060.5310      | 1006.5568                                 |                                           | D    | 622.2831                                  | 621.2879  |                | <span style="color: red;">682.3042</span>  | 665.2777       | 664.2937       | 6  |
| 12 | 120.0808 | 1197.6150 | 1179.6045                                  | 1225.6099                                  | 1207.5994      |                                           |                                           | F    | <span style="color: red;">475.2147</span> |           |                | <span style="color: red;">567.2773</span>  | 550.2508       | 549.2667       | 5  |
| 13 | 44.0495  | 1268.6521 | 1250.6416                                  | 1296.6470                                  | 1278.6365      |                                           |                                           | A    | 404.1776                                  |           |                | <span style="color: red;">420.2089</span>  | 403.1823       | 402.1983       | 4  |
| 14 | 88.0393  | 1383.6791 | <span style="color: red;">1365.6685</span> | <span style="color: red;">1411.6740</span> | 1393.6634      | 1339.6892                                 |                                           | D    | 289.1506                                  | 288.1554  |                | 349.1718                                   | 332.1452       | 331.1612       | 3  |
| 15 | 60.0444  | 1470.7111 | 1452.7005                                  | 1498.7060                                  | 1480.6955      | 1454.7162                                 |                                           | S    | 202.1186                                  | 201.1234  |                | 234.1448                                   | 217.1183       | 216.1343       | 2  |
| 16 | 101.1073 |           |                                            |                                            |                |                                           |                                           | K    | 74.0237                                   | 73.0284   |                | 147.1128                                   | 130.0863       |                | 1  |

| Seq | ya       | yb       | Seq | ya       | yb       | Seq  | ya       | yb       |
|-----|----------|----------|-----|----------|----------|------|----------|----------|
| YS  | 223.1077 | 251.1026 | YSI | 336.1918 | 364.1867 | YSIA | 407.2289 | 435.2238 |

|                 |          |          |                 |          |          |                |          |          |
|-----------------|----------|----------|-----------------|----------|----------|----------------|----------|----------|
| <b>YSIAS</b>    | 494.2609 | 522.2558 | <b>YSIASS</b>   | 581.2930 | 609.2879 | <b>YSIASSA</b> | 652.3301 | 680.3250 |
| <b>SI</b>       | 173.1285 | 201.1234 | <b>SIA</b>      | 244.1656 | 272.1605 | <b>SIAS</b>    | 331.1976 | 359.1925 |
| <b>SIASS</b>    | 418.2296 | 446.2245 | <b>SIASSA</b>   | 489.2667 | 517.2617 | <b>SIASSAI</b> | 602.3508 | 630.3457 |
| <b>SIASSAIG</b> | 659.3723 | 687.3672 | <b>IA</b>       | 157.1335 | 185.1285 | <b>IAS</b>     | 244.1656 | 272.1605 |
| <b>IASS</b>     | 331.1976 | 359.1925 | <b>IASSA</b>    | 402.2347 | 430.2296 | <b>IASSAI</b>  | 515.3188 | 543.3137 |
| <b>IASSAIG</b>  | 572.3402 | 600.3352 | <b>IASSAIGD</b> | 687.3672 | 715.3621 | <b>AS</b>      | 131.0815 | 159.0764 |
| <b>ASS</b>      | 218.1135 | 246.1084 | <b>ASSA</b>     | 289.1506 | 317.1456 | <b>ASSAI</b>   | 402.2347 | 430.2296 |
| <b>ASSAIG</b>   | 459.2562 | 487.2511 | <b>ASSAIGD</b>  | 574.2831 | 602.2780 | <b>SS</b>      | 147.0764 | 175.0713 |
| <b>SSA</b>      | 218.1135 | 246.1084 | <b>SSAI</b>     | 331.1976 | 359.1925 | <b>SSAIG</b>   | 388.2191 | 416.2140 |
| <b>SSAIGD</b>   | 503.2460 | 531.2409 | <b>SSAIGDF</b>  | 650.3144 | 678.3093 | <b>SA</b>      | 131.0815 | 159.0764 |
| <b>SAI</b>      | 244.1656 | 272.1605 | <b>SAIG</b>     | 301.1870 | 329.1819 | <b>SAIGD</b>   | 416.2140 | 444.2089 |
| <b>SAIGDF</b>   | 563.2824 | 591.2773 | <b>SAIGDFA</b>  | 634.3195 | 662.3144 | <b>AI</b>      | 157.1335 | 185.1285 |
| <b>AIG</b>      | 214.1550 | 242.1499 | <b>AIGD</b>     | 329.1819 | 357.1769 | <b>AIGDF</b>   | 476.2504 | 504.2453 |
| <b>AIGDFA</b>   | 547.2875 | 575.2824 | <b>AIGDFAD</b>  | 662.3144 | 690.3093 | <b>IG</b>      | 143.1179 | 171.1128 |
| <b>IGD</b>      | 258.1448 | 286.1397 | <b>IGDF</b>     | 405.2132 | 433.2082 | <b>IGDFA</b>   | 476.2504 | 504.2453 |
| <b>IGDFAD</b>   | 591.2773 | 619.2722 | <b>IGDFADS</b>  | 678.3093 | 706.3042 | <b>GD</b>      | 145.0608 | 173.0557 |
| <b>GDF</b>      | 292.1292 | 320.1241 | <b>G DFA</b>    | 363.1663 | 391.1612 | <b>GDFAD</b>   | 478.1932 | 506.1882 |
| <b>GDFADS</b>   | 565.2253 | 593.2202 | <b>DF</b>       | 235.1077 | 263.1026 | <b>DFA</b>     | 306.1448 | 334.1397 |
| <b>DFAD</b>     | 421.1718 | 449.1667 | <b>DFADS</b>    | 508.2038 | 536.1987 | <b>FA</b>      | 191.1179 | 219.1128 |
| <b>FAD</b>      | 306.1448 | 334.1397 | <b>FADS</b>     | 393.1769 | 421.1718 | <b>AD</b>      | 159.0764 | 187.0713 |
| <b>ADS</b>      | 246.1084 | 274.1034 | <b>DS</b>       | 175.0713 | 203.0662 |                |          |          |

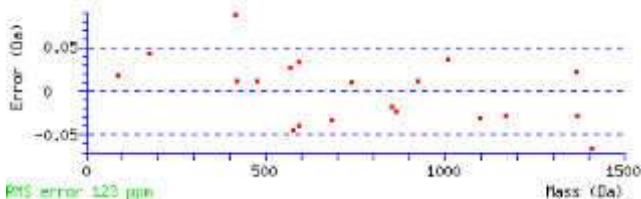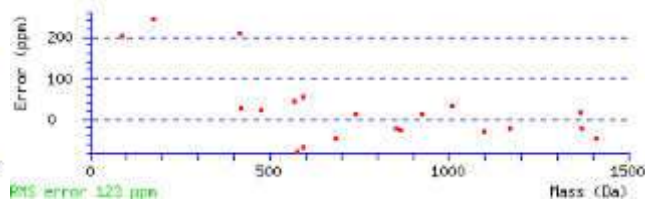

NCBI BLAST search of [LYSIASSAIGDFADSK](#)  
 (Parameters: blastp, nr protein database, expect=20000, no filter, PAM30)  
 Other BLAST [web gateways](#)

All matches to this query

| Score | Mr(calc)  | Delta   | Sequence                         |
|-------|-----------|---------|----------------------------------|
| 69.6  | 1643.8042 | -0.0259 | <a href="#">LYSIASSAIGDFADSK</a> |
| 64.5  | 1643.8043 | -0.0259 | <a href="#">LYSIASSALGDFGDTK</a> |
| 20.5  | 1643.6742 | 0.1041  | <a href="#">CGELDMAGEVFVGGMR</a> |
| 15.6  | 1643.7032 | 0.0751  | <a href="#">RFSGEQDMSSTMPR</a>   |
| 14.0  | 1643.8705 | -0.0922 | <a href="#">LYTVVYIMDLRSR</a>    |
| 10.8  | 1643.7825 | -0.0041 | <a href="#">ESIFNASSSSKCIK</a>   |
| 10.4  | 1643.8242 | -0.0459 | <a href="#">MRAIFYWSLGTGSR</a>   |
| 10.2  | 1643.8705 | -0.0922 | <a href="#">YLAVMQAEPVVGPR</a>   |
| 9.7   | 1643.7766 | 0.0017  | <a href="#">GCTTFEALAAVWR</a>    |
| 9.7   | 1643.7568 | 0.0215  | <a href="#">LKGMEMALTASAMDK</a>  |

Mascot: <http://www.matrixscience.com/>

**MATRIX SCIENCE Mascot Search Results**

**Peptide View Spot no 50**

MS/MS Fragmentation of **EQTNAAGEKMYIQTR**

Found in **gi41052915** in **NCBI**nr, putative ferredoxin-NADP(H) oxidoreductase [Oryza sativa Japonica Group]

Match to Query 34: 1754.808624 from(1755.815900,1+) intensity(0.0000) index(14)

Title: Label: L3, Spot\_Id: 219717, Peak\_List\_Id: 225434, MSMS Job\_Run\_Id: 21778, Comment:

Data file C:\Documents and Settings\Administrator\Desktop\farah BHU\spot set plate\Farah-Garima 11May 2013\ppw\_L3\_136842146000.txt

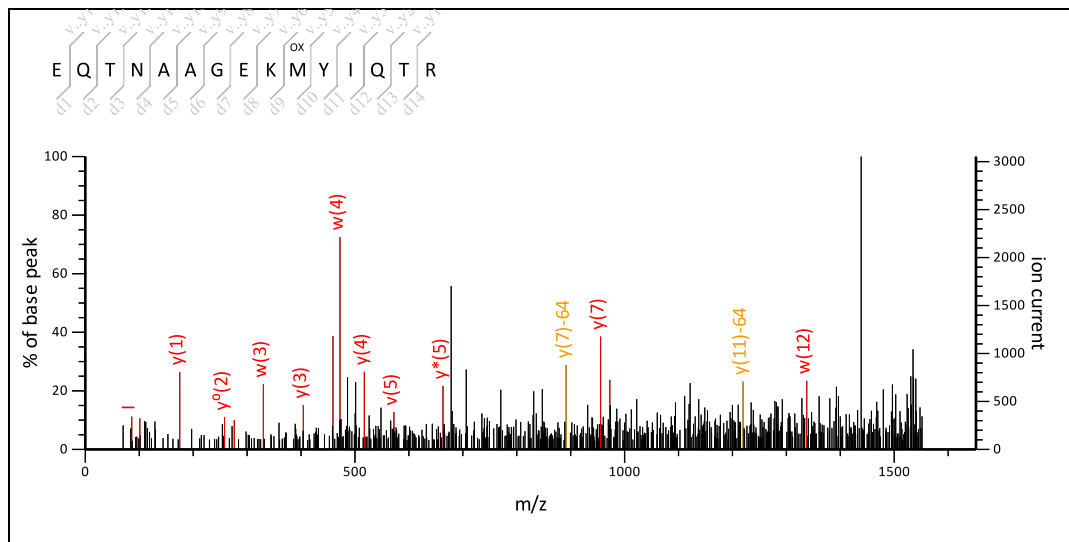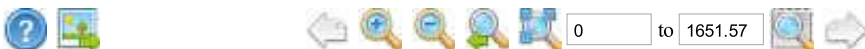

Label all possible matches  Label matches used for scoring

Monoisotopic mass of neutral peptide Mr(calc): 1754.8257

Fixed modifications: Carbamidomethyl (C) (apply to specified residues or termini only)

Variable modifications:

M10 : Oxidation (M), with neutral losses 63.9983(shown in table), 0.0000

Ions Score: 20 Expect: 16

Matches : 25/395 fragment ions using 30 most intense peaks (help)

| #  | Immon.   | a         | a*        | a <sup>0</sup> | b         | b*        | b <sup>0</sup> | d         | d'        | Seq. | v         | w         | w'        | y         | y*        |
|----|----------|-----------|-----------|----------------|-----------|-----------|----------------|-----------|-----------|------|-----------|-----------|-----------|-----------|-----------|
| 1  | 102.0550 | 102.0550  |           | 84.0444        | 130.0499  |           | 112.0393       | 44.0495   |           | E    |           |           |           |           |           |
| 2  | 101.0709 | 230.1135  | 213.0870  | 212.1030       | 258.1084  | 241.0819  | 240.0979       | 173.0921  |           | Q    | 1489.7394 | 1488.7441 |           | 1562.7921 | 1545.7656 |
| 3  | 74.0600  | 331.1612  | 314.1347  | 313.1506       | 359.1561  | 342.1296  | 341.1456       | 315.1663  | 317.1456  | T    | 1388.6917 | 1401.7121 | 1403.6914 | 1434.7336 | 1417.7070 |
| 4  | 87.0553  | 445.2041  | 428.1776  | 427.1936       | 473.1991  | 456.1725  | 455.1885       | 402.1983  |           | N    | 1274.6488 | 1273.6535 |           | 1333.6859 | 1316.6593 |
| 5  | 44.0495  | 516.2413  | 499.2147  | 498.2307       | 544.2362  | 527.2096  | 526.2256       |           |           | A    | 1203.6117 |           |           | 1219.6430 | 1202.6164 |
| 6  | 44.0495  | 587.2784  | 570.2518  | 569.2678       | 615.2733  | 598.2467  | 597.2627       |           |           | A    | 1132.5746 |           |           | 1148.6059 | 1131.5793 |
| 7  | 30.0338  | 644.2998  | 627.2733  | 626.2893       | 672.2947  | 655.2682  | 654.2842       |           |           | G    |           |           |           | 1077.5687 | 1060.5422 |
| 8  | 102.0550 | 773.3424  | 756.3159  | 755.3319       | 801.3373  | 784.3108  | 783.3268       | 715.3369  |           | E    | 946.5105  | 945.5152  |           | 1020.5473 | 1003.5207 |
| 9  | 101.1073 | 901.4374  | 884.4108  | 883.4268       | 929.4323  | 912.4058  | 911.4217       | 844.3795  |           | K    | 818.4155  | 817.4203  |           | 891.5047  | 874.4781  |
| 10 | 56.0495  | 984.4745  | 967.4480  | 966.4639       | 1012.4694 | 995.4429  | 994.4589       | 972.4745  |           | M    | 735.3784  | 734.3832  |           | 763.4097  | 746.3832  |
| 11 | 136.0757 | 1147.5378 | 1130.5113 | 1129.5273      | 1175.5327 | 1158.5062 | 1157.5222      |           |           | Y    | 572.3151  |           |           | 680.3726  | 663.3461  |
| 12 | 86.0964  | 1260.6219 | 1243.5953 | 1242.6113      | 1288.6168 | 1271.5903 | 1270.6062      | 1232.5906 | 1246.6062 | I    | 459.2310  | 472.2514  | 486.2671  | 517.3093  | 500.2827  |
| 13 | 101.0709 | 1388.6805 | 1371.6539 | 1370.6699      | 1416.6754 | 1399.6488 | 1398.6648      | 1331.6590 |           | Q    | 331.1724  | 330.1772  |           | 404.2252  | 387.1987  |
| 14 | 74.0600  | 1489.7282 | 1472.7016 | 1471.7176      | 1517.7231 | 1500.6965 | 1499.7125      | 1473.7332 | 1475.7125 | T    | 230.1248  | 243.1452  | 245.1244  | 276.1666  | 259.1401  |
| 15 | 129.1135 |           |           |                |           |           |                |           |           | R    | 74.0237   | 73.0284   |           | 175.1190  | 158.0924  |

| Seq   | ya       | yb       | Seq    | ya       | yb       | Seq     | ya       | yb       |
|-------|----------|----------|--------|----------|----------|---------|----------|----------|
| QT    | 202.1186 | 230.1135 | QTN    | 316.1615 | 344.1565 | QTNA    | 387.1987 | 415.1936 |
| QTNA  | 458.2358 | 486.2307 | QTNAAG | 515.2572 | 543.2522 | QTNAAGE | 644.2998 | 672.2947 |
| TN    | 188.1030 | 216.0979 | TNA    | 259.1401 | 287.1350 | TNAA    | 330.1772 | 358.1721 |
| TNAAG | 387.1987 | 415.1936 | TNAAGE | 516.2413 | 544.2362 | TNAAGEK | 644.3362 | 672.3311 |
| NA    | 158.0924 | 186.0873 | NAA    | 229.1295 | 257.1244 | NAAG    | 286.1510 | 314.1459 |

|        |          |          |        |          |          |         |          |          |
|--------|----------|----------|--------|----------|----------|---------|----------|----------|
| NAAGE  | 415.1936 | 443.1885 | NAAGEK | 543.2885 | 571.2835 | NAAGEKM | 626.3257 | 654.3206 |
| AA     | 115.0866 | 143.0815 | AAG    | 172.1081 | 200.1030 | AAGE    | 301.1506 | 329.1456 |
| AAGEK  | 429.2456 | 457.2405 | AAGEKM | 512.2827 | 540.2776 | AAGEKMY | 675.3461 | 703.3410 |
| AG     | 101.0709 | 129.0659 | AGE    | 230.1135 | 258.1084 | AGEK    | 358.2085 | 386.2034 |
| AGEKM  | 441.2456 | 469.2405 | AGEKMY | 604.3089 | 632.3039 | GE      | 159.0764 | 187.0713 |
| GEK    | 287.1714 | 315.1663 | GEKM   | 370.2085 | 398.2034 | GEKMY   | 533.2718 | 561.2667 |
| GEKMYI | 646.3559 | 674.3508 | EK     | 230.1499 | 258.1448 | EKM     | 313.1870 | 341.1819 |
| EKMY   | 476.2504 | 504.2453 | EKMYI  | 589.3344 | 617.3293 | KM      | 184.1444 | 212.1394 |
| KMY    | 347.2078 | 375.2027 | KMYI   | 460.2918 | 488.2867 | KMYIQ   | 588.3504 | 616.3453 |
| KMYIQT | 689.3981 | 717.3930 | MY     | 219.1128 | 247.1077 | MYI     | 332.1969 | 360.1918 |
| MYIQ   | 460.2554 | 488.2504 | MYIQT  | 561.3031 | 589.2980 | YI      | 249.1598 | 277.1547 |
| YIQ    | 377.2183 | 405.2132 | YIQT   | 478.2660 | 506.2609 | IQ      | 214.1550 | 242.1499 |
| IQT    | 315.2027 | 343.1976 | QT     | 202.1186 | 230.1135 |         |          |          |

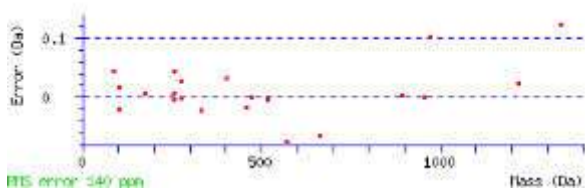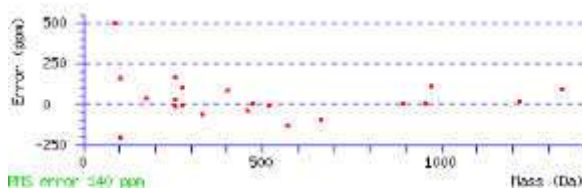

NCBI BLAST search of [EOTNAAGEKMYIOTR](#)

(Parameters: blastp, nr protein database, expect=20000, no filter, PAM30)

Other BLAST [web gateways](#)

#### All matches to this query

| Score | Mr(calcd) | Delta   | Sequence                           |
|-------|-----------|---------|------------------------------------|
| 20.2  | 1754.8257 | -0.0171 | <a href="#">EOTNAAGEKMYIOTR</a>    |
| 12.8  | 1754.9389 | -0.1303 | <a href="#">FLGTCVLTSVYLINR</a>    |
| 12.3  | 1754.8509 | -0.0423 | <a href="#">AGMVEDDILHLIEER</a>    |
| 9.0   | 1754.7460 | 0.0626  | <a href="#">MGILDAVTEMCACPR</a>    |
| 8.9   | 1754.9567 | -0.1481 | <a href="#">FAVTGTVDGPLPEIAIR</a>  |
| 8.9   | 1754.8911 | -0.0825 | <a href="#">LEGTFASTASHAAVNLGR</a> |
| 8.8   | 1754.8542 | -0.0456 | <a href="#">SVISSNSGKVTMAAMEK</a>  |
| 8.6   | 1754.8153 | -0.0067 | <a href="#">IWSAAMEELMSKGMR</a>    |
| 8.6   | 1754.7669 | 0.0418  | <a href="#">EEAEIYEGEAVCTQK</a>    |
| 8.3   | 1754.8509 | -0.0423 | <a href="#">SSPSICKAFGIESTGSK</a>  |

Mascot: <http://www.matrixscience.com/>

**MATRIX SCIENCE Mascot Search Results**

**Peptide View Spot no 50**

MS/MS Fragmentation of **DPNATHIMLGTGTGIAPFR**

Found in **gi41052915** in **NCBI**nr, putative ferredoxin-NADP(H) oxidoreductase [Oryza sativa Japonica Group]

Match to Query 37: 1959.991124 from(1960.998400,1+) intensity(0.0000) index(15)

Title: Label: L3, Spot\_Id: 219717, Peak\_List\_Id: 225438, MSMS Job\_Run\_Id: 21778, Comment:

Data file C:\Documents and Settings\Administrator\Desktop\farah BHU\spot set plate\Farah-Garima 11May 2013\ppw\_L3\_136842146000.txt

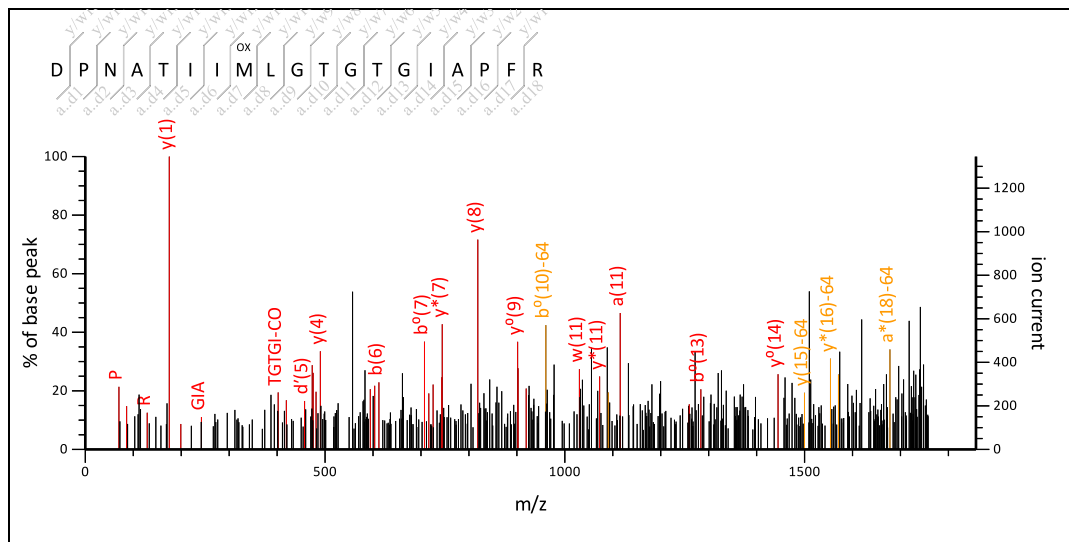

Navigation icons: Home, Back, Forward, Search, and a range input field from 0 to 1857.47.

Label all possible matches  Label matches used for scoring

Monoisotopic mass of neutral peptide Mr(calc): 1960.0088  
 Fixed modifications: Carbamidomethyl (C) (apply to specified residues or termini only)  
 Variable modifications:  
 M8 : Oxidation (M), with neutral losses 63.9983(shown in table), 0.0000  
 Ions Score: 17 Expect: 31  
 Matches : 46/558 fragment ions using 85 most intense peaks (help)

| #  | Immon.   | a         | a*        | a <sup>0</sup> | b         | b*        | b <sup>0</sup> | d         | d'        | Seq. | v         | w         | w'        | y         | y*        |
|----|----------|-----------|-----------|----------------|-----------|-----------|----------------|-----------|-----------|------|-----------|-----------|-----------|-----------|-----------|
| 1  | 88.0393  | 88.0393   |           | 70.0287        | 116.0342  |           | 98.0237        | 44.0495   |           | D    |           |           |           |           |           |
| 2  | 70.0651  | 185.0921  |           | 167.0815       | 213.0870  |           | 195.0764       | 159.0764  |           | P    | 1739.9439 | 1738.9487 |           | 1781.9908 | 1764.9643 |
| 3  | 87.0553  | 299.1350  | 282.1084  | 281.1244       | 327.1299  | 310.1034  | 309.1193       | 256.1292  |           | N    | 1625.9010 | 1624.9057 |           | 1684.9381 | 1667.9115 |
| 4  | 44.0495  | 370.1721  | 353.1456  | 352.1615       | 398.1670  | 381.1405  | 380.1565       |           |           | A    | 1554.8639 |           |           | 1570.8952 | 1553.8686 |
| 5  | 74.0600  | 471.2198  | 454.1932  | 453.2092       | 499.2147  | 482.1882  | 481.2041       | 455.2249  | 457.2041  | T    | 1453.8162 | 1466.8366 | 1468.8158 | 1499.8580 | 1482.8315 |
| 6  | 86.0964  | 584.3039  | 567.2773  | 566.2933       | 612.2988  | 595.2722  | 594.2882       | 556.2726  | 570.2882  | I    | 1340.7321 | 1353.7525 | 1367.7682 | 1398.8104 | 1381.7838 |
| 7  | 86.0964  | 697.3879  | 680.3614  | 679.3774       | 725.3828  | 708.3563  | 707.3723       | 669.3566  | 683.3723  | I    | 1227.6481 | 1240.6685 | 1254.6841 | 1285.7263 | 1268.6998 |
| 8  | 56.0495  | 780.4250  | 763.3985  | 762.4145       | 808.4199  | 791.3934  | 790.4094       | 768.4250  |           | M    | 1144.6109 | 1143.6157 |           | 1172.6422 | 1155.6157 |
| 9  | 86.0964  | 893.5091  | 876.4825  | 875.4985       | 921.5040  | 904.4775  | 903.4934       | 851.4621  |           | L    | 1031.5269 | 1030.5316 |           | 1089.6051 | 1072.5786 |
| 10 | 30.0338  | 950.5306  | 933.5040  | 932.5200       | 978.5255  | 961.4989  | 960.5149       |           |           | G    |           |           |           | 976.5211  | 959.4945  |
| 11 | 74.0600  | 1051.5782 | 1034.5517 | 1033.5677      | 1079.5732 | 1062.5466 | 1061.5626      | 1035.5833 | 1037.5626 | T    | 873.4577  | 886.4781  | 888.4574  | 919.4996  | 902.4730  |
| 12 | 30.0338  | 1108.5997 | 1091.5732 | 1090.5891      | 1136.5946 | 1119.5681 | 1118.5841      |           |           | G    |           |           |           | 818.4519  | 801.4254  |
| 13 | 74.0600  | 1209.6474 | 1192.6208 | 1191.6368      | 1237.6423 | 1220.6157 | 1219.6317      | 1193.6525 | 1195.6317 | T    | 715.3886  | 728.4090  | 730.3883  | 761.4305  | 744.4039  |
| 14 | 30.0338  | 1266.6688 | 1249.6423 | 1248.6583      | 1294.6638 | 1277.6372 | 1276.6532      |           |           | G    |           |           |           | 660.3828  | 643.3562  |
| 15 | 86.0964  | 1379.7529 | 1362.7264 | 1361.7423      | 1407.7478 | 1390.7213 | 1389.7373      | 1351.7216 | 1365.7373 | I    | 545.2831  | 558.3035  | 572.3191  | 603.3613  | 586.3348  |
| 16 | 44.0495  | 1450.7900 | 1433.7635 | 1432.7795      | 1478.7849 | 1461.7584 | 1460.7744      |           |           | A    | 474.2459  |           |           | 490.2772  | 473.2507  |
| 17 | 70.0651  | 1547.8428 | 1530.8162 | 1529.8322      | 1575.8377 | 1558.8112 | 1557.8271      | 1521.8271 |           | P    | 377.1932  | 376.1979  |           | 419.2401  | 402.2136  |
| 18 | 120.0808 | 1694.9112 | 1677.8847 | 1676.9006      | 1722.9061 | 1705.8796 | 1704.8956      |           |           | F    | 230.1248  |           |           | 322.1874  | 305.1608  |
| 19 | 129.1135 |           |           |                |           |           |                |           |           | R    | 74.0237   | 73.0284   |           | 175.1190  | 158.0924  |

| Seq | ya       | yb       | Seq | ya       | yb       | Seq  | ya       | yb       |
|-----|----------|----------|-----|----------|----------|------|----------|----------|
| PN  | 184.1081 | 212.1030 | PNA | 255.1452 | 283.1401 | PNAT | 356.1928 | 384.1878 |

|          |          |          |          |          |          |          |          |          |
|----------|----------|----------|----------|----------|----------|----------|----------|----------|
| PNATI    | 469.2769 | 497.2718 | PNATHI   | 582.3610 | 610.3559 | PNATHIM  | 665.3981 | 693.3930 |
| NA       | 158.0924 | 186.0873 | NAT      | 259.1401 | 287.1350 | NATI     | 372.2241 | 400.2191 |
| NATHI    | 485.3082 | 513.3031 | NATHIM   | 568.3453 | 596.3402 | NATHIML  | 681.4294 | 709.4243 |
| AT       | 145.0972 | 173.0921 | ATI      | 258.1812 | 286.1761 | ATHI     | 371.2653 | 399.2602 |
| ATHIM    | 454.3024 | 482.2973 | ATHIML   | 567.3865 | 595.3814 | ATHIMLG  | 624.4079 | 652.4028 |
| TI       | 187.1441 | 215.1390 | TII      | 300.2282 | 328.2231 | TIIM     | 383.2653 | 411.2602 |
| TIIML    | 496.3493 | 524.3443 | TIIMLG   | 553.3708 | 581.3657 | TIIMLGT  | 654.4185 | 682.4134 |
| II       | 199.1805 | 227.1754 | IIM      | 282.2176 | 310.2125 | IIML     | 395.3017 | 423.2966 |
| IIMLG    | 452.3231 | 480.3180 | IIMLGT   | 553.3708 | 581.3657 | IIMLGTG  | 610.3923 | 638.3872 |
| IM       | 169.1335 | 197.1285 | IML      | 282.2176 | 310.2125 | IMLG     | 339.2391 | 367.2340 |
| IMLGT    | 440.2867 | 468.2817 | IMLGTG   | 497.3082 | 525.3031 | IMLGTGT  | 598.3559 | 626.3508 |
| IMLGTGTG | 655.3774 | 683.3723 | ML       | 169.1335 | 197.1285 | MLG      | 226.1550 | 254.1499 |
| MLGT     | 327.2027 | 355.1976 | MLGTG    | 384.2241 | 412.2191 | MLGTGT   | 485.2718 | 513.2667 |
| MLGTGTG  | 542.2933 | 570.2882 | MLGTGTGI | 655.3774 | 683.3723 | LG       | 143.1179 | 171.1128 |
| LGT      | 244.1656 | 272.1605 | LGTG     | 301.1870 | 329.1819 | LGTGT    | 402.2347 | 430.2296 |
| LGTGTG   | 459.2562 | 487.2511 | LGTGTGI  | 572.3402 | 600.3352 | LGTGTGIA | 643.3774 | 671.3723 |
| GT       | 131.0815 | 159.0764 | GTG      | 188.1030 | 216.0979 | GTGT     | 289.1506 | 317.1456 |
| GTGTG    | 346.1721 | 374.1670 | GTGTGI   | 459.2562 | 487.2511 | GTGTGIA  | 530.2933 | 558.2882 |
| GTGTGIAP | 627.3461 | 655.3410 | TG       | 131.0815 | 159.0764 | TGT      | 232.1292 | 260.1241 |
| TGTG     | 289.1506 | 317.1456 | TGTGI    | 402.2347 | 430.2296 | TGTGIA   | 473.2718 | 501.2667 |
| TGTGIAP  | 570.3246 | 598.3195 | GT       | 131.0815 | 159.0764 | GTG      | 188.1030 | 216.0979 |
| GTGI     | 301.1870 | 329.1819 | GTGIA    | 372.2241 | 400.2191 | GTGIAP   | 469.2769 | 497.2718 |
| GTGIAPF  | 616.3453 | 644.3402 | TG       | 131.0815 | 159.0764 | TGI      | 244.1656 | 272.1605 |
| TGIA     | 315.2027 | 343.1976 | TGIAP    | 412.2554 | 440.2504 | TGIAPF   | 559.3239 | 587.3188 |
| GI       | 143.1179 | 171.1128 | GIA      | 214.1550 | 242.1499 | GIAP     | 311.2078 | 339.2027 |
| GIAPF    | 458.2762 | 486.2711 | IA       | 157.1335 | 185.1285 | IAP      | 254.1863 | 282.1812 |
| IAPF     | 401.2547 | 429.2496 | AP       | 141.1022 | 169.0972 | APF      | 288.1707 | 316.1656 |
| PF       | 217.1335 | 245.1285 |          |          |          |          |          |          |

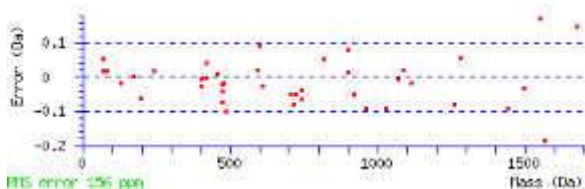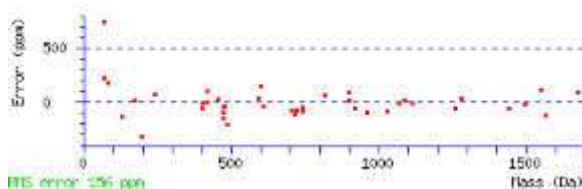

NCBI BLAST search of [DPNATHIMLGTGTGIAPFR](#)  
 (Parameters: blastp, nr protein database, expect=20000, no filter, PAM30)  
 Other BLAST [web gateways](#)

All matches to this query

| Score | Mr(calc)  | Delta   | Sequence                            |
|-------|-----------|---------|-------------------------------------|
| 17.2  | 1960.0088 | -0.0177 | <a href="#">DPNATHIMLGTGTGIAPFR</a> |
| 11.5  | 1960.0088 | -0.0177 | <a href="#">DPNATVIMLATGTGIAPFR</a> |
| 10.8  | 1960.0088 | -0.0177 | <a href="#">DPNATIVMLATGTGIAPFR</a> |
| 7.5   | 1959.9133 | 0.0778  | <a href="#">DSEKNDAEVQAEGLNSR</a>   |
| 4.5   | 1959.9610 | 0.0301  | <a href="#">GGDNNLATLDATTARVDTR</a> |
| 4.5   | 1960.0234 | -0.0323 | <a href="#">VVKPTSVMVELCEARAR</a>   |
| 3.9   | 1960.0485 | -0.0574 | <a href="#">RLTAMSTVVALPNMLDTK</a>  |
| 3.7   | 1960.0234 | -0.0323 | <a href="#">AAEILKGMVTLGCKPNSR</a>  |
| 3.7   | 1959.8592 | 0.1319  | <a href="#">QDVCDAAAAVADGGEGEAR</a> |
| 3.6   | 1959.9974 | -0.0063 | <a href="#">VTATTINDGKRPATSSEGR</a> |

Mascot: <http://www.matrixscience.com/>




**Mascot Search Results**
**Peptide View Spot no 53**
MS/MS Fragmentation of **LLFEVAPLGFLIEK**Found in **gi118175929** in **NCBI**nr, chloroplast sedoheptulose-1,7-bisphosphatase [Morus alba var. multicaulis]

Match to Query 75: 1587.902624 from(1588.909900,1+) intensity(0.0000) index(11)

Title: Label: H4, Spot\_Id: 219729, Peak\_List\_Id: 225332, MSMS Job\_Run\_Id: 21774, Comment:

Data file C:\Documents and Settings\Administrator\Desktop\farah BHU\spot set plate\Farah-Garima 11May 2013\ppw\_H4\_136842165600.txt

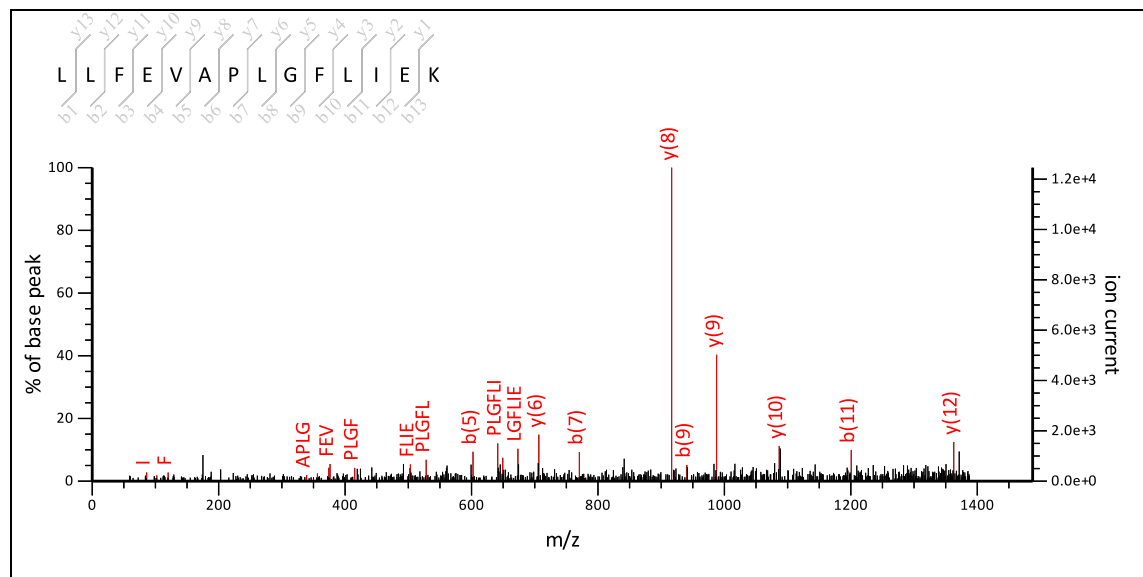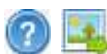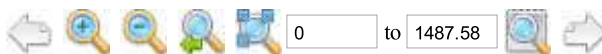Label all possible matches  Label matches used for scoring Monoisotopic mass of neutral peptide  $M_r(\text{calc})$ : 1587.9276

Fixed modifications: Carbamidomethyl (C) (apply to specified residues or termini only)

Ions Score: 34 Expect: 0.61

Matches : 35/225 fragment ions using 56 most intense peaks ([help](#))

| #  | Immon.   | a               | a <sup>0</sup> | b                | b <sup>0</sup> | d         | d'        | Seq. | v         | w         | w'       | y                | y*        | y <sup>0</sup> | #  |
|----|----------|-----------------|----------------|------------------|----------------|-----------|-----------|------|-----------|-----------|----------|------------------|-----------|----------------|----|
| 1  | 86.0964  | <b>86.0964</b>  |                | 114.0913         |                | 44.0495   |           | L    |           |           |          |                  |           |                | 14 |
| 2  | 86.0964  | 199.1805        |                | 227.1754         |                | 157.1335  |           | L    | 1417.7726 | 1416.7773 |          | 1475.8508        | 1458.8243 | 1457.8403      | 13 |
| 3  | 120.0808 | 346.2489        |                | <b>374.2438</b>  |                |           |           | F    | 1270.7042 |           |          | <b>1362.7668</b> | 1345.7402 | 1344.7562      | 12 |
| 4  | 102.0550 | 475.2915        | 457.2809       | <b>503.2864</b>  | 485.2758       | 417.2860  |           | E    | 1141.6616 | 1140.6663 |          | 1215.6984        | 1198.6718 | 1197.6878      | 11 |
| 5  | 72.0808  | 574.3599        | 556.3493       | <b>602.3548</b>  | 584.3443       | 560.3443  |           | V    | 1042.5932 | 1055.6136 |          | <b>1086.6558</b> | 1069.6292 | 1068.6452      | 10 |
| 6  | 44.0495  | <b>645.3970</b> | 627.3865       | <b>673.3919</b>  | 655.3814       |           |           | A    | 971.5560  |           |          | <b>987.5873</b>  | 970.5608  | 969.5768       | 9  |
| 7  | 70.0651  | 742.4498        | 724.4392       | <b>770.4447</b>  | 752.4341       | 716.4341  |           | P    | 874.5033  | 873.5080  |          | <b>916.5502</b>  | 899.5237  | 898.5397       | 8  |
| 8  | 86.0964  | 855.5339        | 837.5233       | 883.5288         | 865.5182       | 813.4869  |           | L    | 761.4192  | 760.4240  |          | 819.4975         | 802.4709  | 801.4869       | 7  |
| 9  | 30.0338  | 912.5553        | 894.5448       | <b>940.5502</b>  | 922.5397       |           |           | G    |           |           |          | <b>706.4134</b>  | 689.3869  | 688.4028       | 6  |
| 10 | 120.0808 | 1059.6237       | 1041.6132      | 1087.6186        | 1069.6081      |           |           | F    | 557.3293  |           |          | <b>649.3919</b>  | 632.3654  | 631.3814       | 5  |
| 11 | 86.0964  | 1172.7078       | 1154.6972      | <b>1200.7027</b> | 1182.6921      | 1130.6608 |           | L    | 444.2453  | 443.2500  |          | <b>502.3235</b>  | 485.2970  | 484.3130       | 4  |
| 12 | 86.0964  | 1285.7919       | 1267.7813      | 1313.7868        | 1295.7762      | 1257.7606 | 1271.7762 | I    | 331.1612  | 344.1816  | 358.1973 | 389.2395         | 372.2129  | 371.2289       | 3  |
| 13 | 102.0550 | 1414.8345       | 1396.8239      | 1442.8294        | 1424.8188      | 1356.8290 |           | E    | 202.1186  | 201.1234  |          | 276.1554         | 259.1288  | 258.1448       | 2  |
| 14 | 101.1073 |                 |                |                  |                |           |           | K    | 74.0237   | 73.0284   |          | 147.1128         | 130.0863  |                | 1  |

| Seq   | ya       | yb              | Seq    | ya       | yb       | Seq   | ya       | yb       |
|-------|----------|-----------------|--------|----------|----------|-------|----------|----------|
| LF    | 233.1648 | 261.1598        | LFE    | 362.2074 | 390.2023 | LFEV  | 461.2758 | 489.2708 |
| LFEVA | 532.3130 | 560.3079        | LFEVAP | 629.3657 | 657.3606 | FE    | 249.1234 | 277.1183 |
| FEV   | 348.1918 | <b>376.1867</b> | FEVA   | 419.2289 | 447.2238 | FEVAP | 516.2817 | 544.2766 |



|               |          |                 |                |          |                 |               |                 |                 |
|---------------|----------|-----------------|----------------|----------|-----------------|---------------|-----------------|-----------------|
| <b>FEVAPL</b> | 629.3657 | 657.3606        | <b>FEVAPLG</b> | 686.3872 | 714.3821        | <b>EV</b>     | 201.1234        | 229.1183        |
| <b>EVA</b>    | 272.1605 | 300.1554        | <b>EVAP</b>    | 369.2132 | 397.2082        | <b>EVAPL</b>  | 482.2973        | 510.2922        |
| <b>EVAPLG</b> | 539.3188 | 567.3137        | <b>EVAPLGF</b> | 686.3872 | 714.3821        | <b>VA</b>     | 143.1179        | 171.1128        |
| <b>VAP</b>    | 240.1707 | 268.1656        | <b>VAPL</b>    | 353.2547 | 381.2496        | <b>VAPLG</b>  | 410.2762        | 438.2711        |
| <b>VAPLGF</b> | 557.3446 | 585.3395        | <b>VAPLGFL</b> | 670.4287 | 698.4236        | <b>AP</b>     | 141.1022        | 169.0972        |
| <b>APL</b>    | 254.1863 | 282.1812        | <b>APLG</b>    | 311.2078 | <b>339.2027</b> | <b>APLGF</b>  | 458.2762        | 486.2711        |
| <b>APLGFL</b> | 571.3602 | 599.3552        | <b>APLGFLI</b> | 684.4443 | 712.4392        | <b>PL</b>     | 183.1492        | 211.1441        |
| <b>PLG</b>    | 240.1707 | 268.1656        | <b>PLGF</b>    | 387.2391 | <b>415.2340</b> | <b>PLGFL</b>  | 500.3231        | <b>528.3180</b> |
| <b>PLGFLI</b> | 613.4072 | <b>641.4021</b> | <b>LG</b>      | 143.1179 | 171.1128        | <b>LGF</b>    | 290.1863        | 318.1812        |
| <b>LGFL</b>   | 403.2704 | 431.2653        | <b>LGFLI</b>   | 516.3544 | 544.3493        | <b>LGFLIE</b> | <b>645.3970</b> | <b>673.3919</b> |
| <b>GF</b>     | 177.1022 | 205.0972        | <b>GFL</b>     | 290.1863 | 318.1812        | <b>GFLI</b>   | 403.2704        | 431.2653        |
| <b>GFLIE</b>  | 532.3130 | 560.3079        | <b>FL</b>      | 233.1648 | 261.1598        | <b>FLI</b>    | 346.2489        | <b>374.2438</b> |
| <b>FLIE</b>   | 475.2915 | <b>503.2864</b> | <b>LI</b>      | 199.1805 | 227.1754        | <b>LIE</b>    | 328.2231        | <b>356.2180</b> |
| <b>IE</b>     | 215.1390 | 243.1339        |                |          |                 |               |                 |                 |

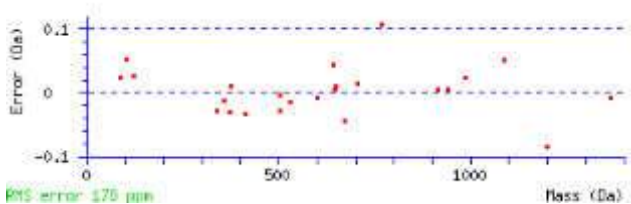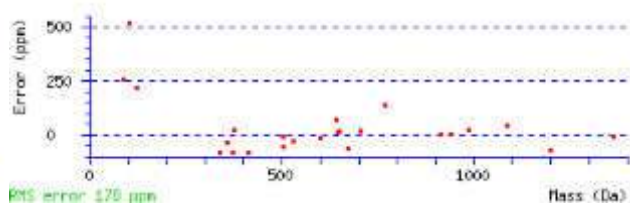

NCBI BLAST search of [LLFEVAPLGFLIEK](#)

(Parameters: blastp, nr protein database, expect=20000, no filter, PAM30)

Other BLAST [web gateways](#)

#### All matches to this query

| Score | Mr(calc)  | Delta   | Sequence                          |
|-------|-----------|---------|-----------------------------------|
| 34.0  | 1587.9276 | -0.0250 | <a href="#">LLFEVAPLGFLIEK</a>    |
| 15.5  | 1587.9276 | -0.0250 | <a href="#">IVLEAFPAVFLLEK</a>    |
| 14.9  | 1587.8304 | 0.0723  | <a href="#">ATQAIAPMHAADVHR</a>   |
| 14.7  | 1587.7881 | 0.1145  | <a href="#">WMAGRGWAAGLAWR</a>    |
| 14.1  | 1587.7650 | 0.1377  | <a href="#">INWMKAGMLESHR</a>     |
| 13.5  | 1587.8151 | 0.0875  | <a href="#">MGGAILLSNROADR</a>    |
| 13.2  | 1587.8005 | 0.1021  | <a href="#">GFLSINSQPAVNGER</a>   |
| 13.1  | 1587.8654 | 0.0372  | <a href="#">MDLILAQLTTINAR</a>    |
| 12.8  | 1587.7675 | 0.1352  | <a href="#">NMKPDAAAASLNDVR</a>   |
| 12.7  | 1587.7536 | 0.1490  | <a href="#">MGQDAVAANGTAGGGRR</a> |

Mascot: <http://www.matrixscience.com/>

**MATRIX SCIENCE Mascot Search Results**

**Peptide View Spot no 53**

MS/MS Fragmentation of **NEIIRFEETLYGSSR**

Found in **gi|118175929** in **NCBItr**, chloroplast sedoheptulose-1,7-bisphosphatase [*Morus alba* var. *multicaulis*]

Match to Query 82: 1812.887224 from(1813.894500,1+) intensity(0.0000) index(14)

Title: Label: H4, Spot\_Id: 219729, Peak\_List\_Id: 225328, MSMS Job\_Run\_Id: 21774, Comment:

Data file C:\Documents and Settings\Administrator\Desktop\farah BHU\spot set plate\Farah-Garima 11May 2013\ppw\_H4\_136842165600.txt

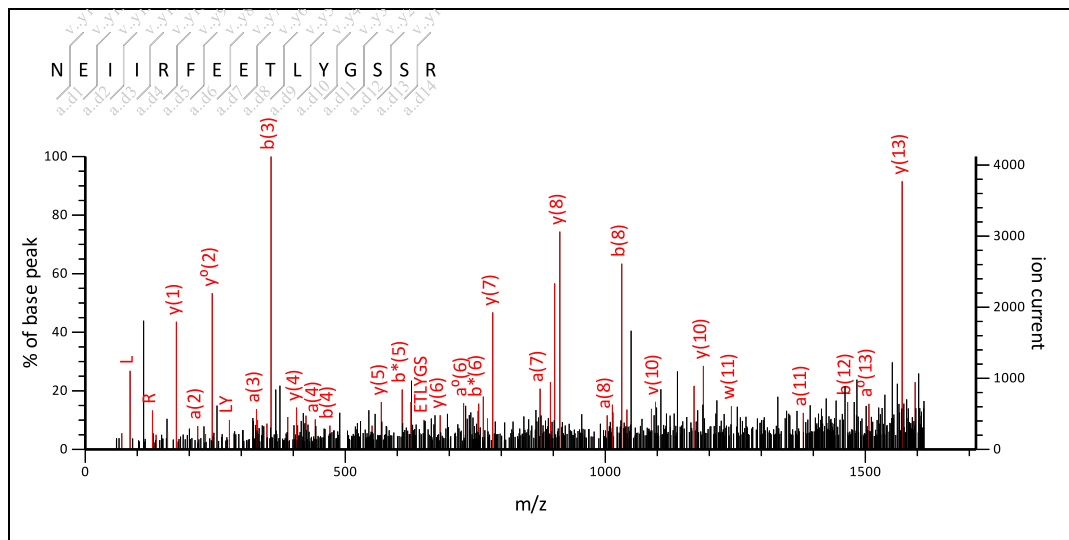

Navigation icons: Home, Back, Forward, Search, and a range input field from 0 to 1712.7.

Label all possible matches  Label matches used for scoring

Monoisotopic mass of neutral peptide Mr(calc): 1812.9006

Fixed modifications: Carbamidomethyl (C) (apply to specified residues or termini only)

Ions Score: 33 Expect: 1.1

Matches : 61/269 fragment ions using 128 most intense peaks [\(help\)](#)

| #  | Immon.   | a         | a*        | a <sup>0</sup> | b         | b*        | b <sup>0</sup> | d         | d'        | Seq. | v         | w         | w'        | y         | y*        |
|----|----------|-----------|-----------|----------------|-----------|-----------|----------------|-----------|-----------|------|-----------|-----------|-----------|-----------|-----------|
| 1  | 87.0553  | 87.0553   | 70.0287   |                | 115.0502  | 98.0237   |                | 44.0495   |           | N    |           |           |           |           |           |
| 2  | 102.0550 | 216.0979  | 199.0713  | 198.0873       | 244.0928  | 227.0662  | 226.0822       | 158.0924  |           | E    | 1625.8282 | 1624.8329 |           | 1699.8650 | 1682.8384 |
| 3  | 86.0964  | 329.1819  | 312.1554  | 311.1714       | 357.1769  | 340.1503  | 339.1663       | 301.1506  | 315.1663  | I    | 1512.7441 | 1525.7645 | 1539.7802 | 1570.8224 | 1553.7958 |
| 4  | 86.0964  | 442.2660  | 425.2395  | 424.2554       | 470.2609  | 453.2344  | 452.2504       | 414.2347  | 428.2504  | I    | 1399.6601 | 1412.6805 | 1426.6961 | 1457.7383 | 1440.7118 |
| 5  | 129.1135 | 598.3671  | 581.3406  | 580.3566       | 626.3620  | 609.3355  | 608.3515       | 513.3031  |           | R    | 1243.5590 | 1242.5637 |           | 1344.6543 | 1327.6277 |
| 6  | 120.0808 | 745.4355  | 728.4090  | 727.4250       | 773.4304  | 756.4039  | 755.4199       |           |           | F    | 1096.4905 |           |           | 1188.5531 | 1171.5266 |
| 7  | 102.0550 | 874.4781  | 857.4516  | 856.4676       | 902.4730  | 885.4465  | 884.4625       | 816.4726  |           | E    | 967.4480  | 966.4527  |           | 1041.4847 | 1024.4582 |
| 8  | 102.0550 | 1003.5207 | 986.4942  | 985.5102       | 1031.5156 | 1014.4891 | 1013.5051      | 945.5152  |           | E    | 838.4054  | 837.4101  |           | 912.4421  | 895.4156  |
| 9  | 74.0600  | 1104.5684 | 1087.5419 | 1086.5578      | 1132.5633 | 1115.5368 | 1114.5527      | 1088.5735 | 1090.5527 | T    | 737.3577  | 750.3781  | 752.3573  | 783.3995  | 766.3730  |
| 10 | 86.0964  | 1217.6525 | 1200.6259 | 1199.6419      | 1245.6474 | 1228.6208 | 1227.6368      | 1175.6055 |           | L    | 624.2736  | 623.2784  |           | 682.3519  | 665.3253  |
| 11 | 136.0757 | 1380.7158 | 1363.6892 | 1362.7052      | 1408.7107 | 1391.6842 | 1390.7001      |           |           | Y    | 461.2103  |           |           | 569.2678  | 552.2413  |
| 12 | 30.0338  | 1437.7373 | 1420.7107 | 1419.7267      | 1465.7322 | 1448.7056 | 1447.7216      |           |           | G    |           |           |           | 406.2045  | 389.1779  |
| 13 | 60.0444  | 1524.7693 | 1507.7427 | 1506.7587      | 1552.7642 | 1535.7377 | 1534.7536      | 1508.7744 |           | S    | 317.1568  | 316.1615  |           | 349.1830  | 332.1565  |
| 14 | 60.0444  | 1611.8013 | 1594.7748 | 1593.7907      | 1639.7962 | 1622.7697 | 1621.7857      | 1595.8064 |           | S    | 230.1248  | 229.1295  |           | 262.1510  | 245.1244  |
| 15 | 129.1135 |           |           |                |           |           |                |           |           | R    | 74.0237   | 73.0284   |           | 175.1190  | 158.0924  |

| Seq   | ya       | yb       | Seq   | ya       | yb       | Seq   | ya       | yb       |
|-------|----------|----------|-------|----------|----------|-------|----------|----------|
| EI    | 215.1390 | 243.1339 | EII   | 328.2231 | 356.2180 | EIIR  | 484.3242 | 512.3191 |
| EIRF  | 631.3926 | 659.3875 | II    | 199.1805 | 227.1754 | IIR   | 355.2816 | 383.2765 |
| IIRF  | 502.3500 | 530.3449 | IIRFE | 631.3926 | 659.3875 | IR    | 242.1975 | 270.1925 |
| IRF   | 389.2659 | 417.2609 | IRFE  | 518.3085 | 546.3035 | IRFEE | 647.3511 | 675.3461 |
| RF    | 276.1819 | 304.1768 | RFE   | 405.2245 | 433.2194 | RFEE  | 534.2671 | 562.2620 |
| RFEET | 635.3148 | 663.3097 | FE    | 249.1234 | 277.1183 | FEE   | 378.1660 | 406.1609 |

|               |          |          |               |          |                 |               |                 |                 |
|---------------|----------|----------|---------------|----------|-----------------|---------------|-----------------|-----------------|
| <b>FEET</b>   | 479.2136 | 507.2086 | <b>FEETL</b>  | 592.2977 | 620.2926        | <b>EE</b>     | <b>231.0975</b> | 259.0925        |
| <b>EET</b>    | 332.1452 | 360.1401 | <b>EETL</b>   | 445.2293 | 473.2242        | <b>EETLY</b>  | 608.2926        | 636.2875        |
| <b>EETLYG</b> | 665.3141 | 693.3090 | <b>ET</b>     | 203.1026 | <b>231.0975</b> | <b>ETL</b>    | 316.1867        | 344.1816        |
| <b>ETLY</b>   | 479.2500 | 507.2449 | <b>ETLYG</b>  | 536.2715 | 564.2664        | <b>ETLYGS</b> | 623.3035        | <b>651.2984</b> |
| <b>TL</b>     | 187.1441 | 215.1390 | <b>TLY</b>    | 350.2074 | 378.2023        | <b>TLYG</b>   | 407.2289        | 435.2238        |
| <b>TLYGS</b>  | 494.2609 | 522.2558 | <b>TLYGSS</b> | 581.2930 | <b>609.2879</b> | <b>LY</b>     | 249.1598        | <b>277.1547</b> |
| <b>LYG</b>    | 306.1812 | 334.1761 | <b>LYGS</b>   | 393.2132 | 421.2082        | <b>LYGSS</b>  | 480.2453        | 508.2402        |
| <b>YG</b>     | 193.0972 | 221.0921 | <b>YGS</b>    | 280.1292 | 308.1241        | <b>YGSS</b>   | 367.1612        | 395.1561        |
| <b>GS</b>     | 117.0659 | 145.0608 | <b>GSS</b>    | 204.0979 | 232.0928        | <b>SS</b>     | 147.0764        | <b>175.0713</b> |

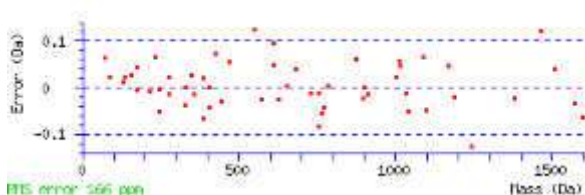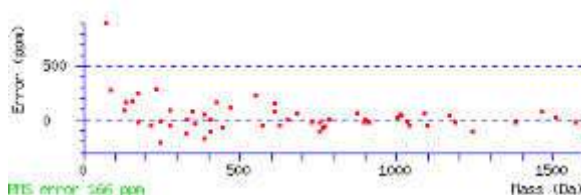

NCBI BLAST search of [NEIRFEETLYGSSR](#)

(Parameters: blastp, nr protein database, expect=20000, no filter, PAM30)

Other BLAST [web gateways](#)

#### All matches to this query

| Score | Mr(calc)  | Delta   | Sequence                          |
|-------|-----------|---------|-----------------------------------|
| 32.6  | 1812.9006 | -0.0134 | <a href="#">NEIRFEETLYGSSR</a>    |
| 14.8  | 1812.9330 | -0.0457 | <a href="#">QDSELAQLRVQEIET</a>   |
| 14.5  | 1812.8755 | 0.0118  | <a href="#">QSLAFILEDGNHEOGR</a>  |
| 13.4  | 1812.9330 | -0.0457 | <a href="#">QDLSTNEGSKOPAIVAR</a> |
| 10.1  | 1812.9621 | -0.0749 | <a href="#">GGETIFPEAEGKLLQPK</a> |
| 9.6   | 1812.8604 | 0.0268  | <a href="#">RLGSVFLEEFVMEEE</a>   |
| 9.4   | 1812.9523 | -0.0651 | <a href="#">GVPLNAGRFWTPVATV</a>  |
| 9.1   | 1812.8014 | 0.0858  | <a href="#">ODITNSDVGSTEDFGK</a>  |
| 8.9   | 1813.0058 | -0.1185 | <a href="#">SALLATDLAGLTRGTPR</a> |
| 8.9   | 1812.9330 | -0.0457 | <a href="#">RVVDLEAELSSPTNQR</a>  |

Mascot: <http://www.matrixscience.com/>

**MATRIX SCIENCE Mascot Search Results**

**Peptide View Spot no 53**

MS/MS Fragmentation of **LRLLEFVAPLGLFLIEK**

Found in **gi|118175929** in **NCBINr**, chloroplast sedoheptulose-1,7-bisphosphatase [*Morus alba* var. *multicaulis*]

Match to Query 86: 1857.107224 from(1858.114500,1+) intensity(0.0000) index(16)

Title: Label: H4, Spot\_Id: 219729, Peak\_List\_Id: 225334, MSMS Job\_Run\_Id: 21774, Comment:

Data file C:\Documents and Settings\Administrator\Desktop\farah BHU\spot set plate\Farah-Garima 11May 2013\ppw\_H4\_136842165600.txt

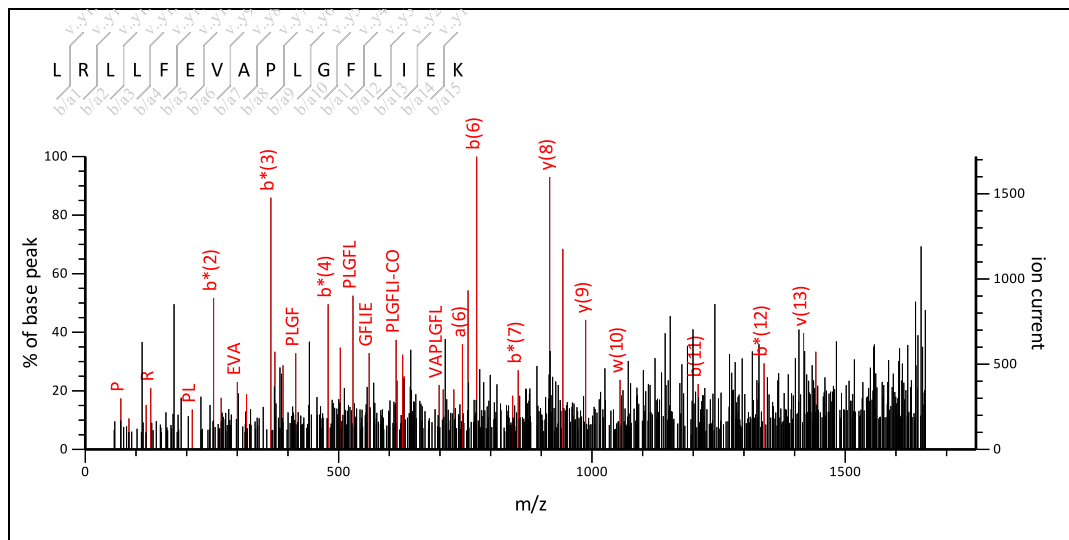

Navigation icons: Home, Back, Forward, Search, Print, Refresh. Search range: 0 to 1758.02

Label all possible matches  Label matches used for scoring

Monoisotopic mass of neutral peptide Mr(calc): 1857.1128

Fixed modifications: Carbamidomethyl (C) (apply to specified residues or termini only)

Ions Score: 5 Expect: 8.2e+02

Matches : 52/289 fragment ions using 114 most intense peaks [\(help\)](#)

| #  | Immon.   | a         | a*        | a <sup>0</sup> | b         | b*        | b <sup>0</sup> | d         | d'        | Seq. | v         | w         | w'       | y         | y*        |
|----|----------|-----------|-----------|----------------|-----------|-----------|----------------|-----------|-----------|------|-----------|-----------|----------|-----------|-----------|
| 1  | 86.0964  | 86.0964   |           |                | 114.0913  |           |                | 44.0495   |           | L    |           |           |          |           |           |
| 2  | 129.1135 | 242.1975  | 225.1710  |                | 270.1925  | 253.1659  |                | 157.1335  |           | R    | 1643.9407 | 1642.9455 |          | 1745.0360 | 1728.0095 |
| 3  | 86.0964  | 355.2816  | 338.2551  |                | 383.2765  | 366.2500  |                | 313.2347  |           | L    | 1530.8566 | 1529.8614 |          | 1588.9349 | 1571.9083 |
| 4  | 86.0964  | 468.3657  | 451.3391  |                | 496.3606  | 479.3340  |                | 426.3187  |           | L    | 1417.7726 | 1416.7773 |          | 1475.8508 | 1458.8243 |
| 5  | 120.0808 | 615.4341  | 598.4075  |                | 643.4290  | 626.4024  |                |           |           | F    | 1270.7042 |           |          | 1362.7668 | 1345.7402 |
| 6  | 102.0550 | 744.4767  | 727.4501  | 726.4661       | 772.4716  | 755.4450  | 754.4610       | 686.4712  |           | E    | 1141.6616 | 1140.6663 |          | 1215.6984 | 1198.6718 |
| 7  | 72.0808  | 843.5451  | 826.5185  | 825.5345       | 871.5400  | 854.5135  | 853.5294       | 829.5294  |           | V    | 1042.5932 | 1055.6136 |          | 1086.6558 | 1069.6292 |
| 8  | 44.0495  | 914.5822  | 897.5557  | 896.5716       | 942.5771  | 925.5506  | 924.5665       |           |           | A    | 971.5560  |           |          | 987.5873  | 970.5608  |
| 9  | 70.0651  | 1011.6350 | 994.6084  | 993.6244       | 1039.6299 | 1022.6033 | 1021.6193      | 985.6193  |           | P    | 874.5033  | 873.5080  |          | 916.5502  | 899.5237  |
| 10 | 86.0964  | 1124.7190 | 1107.6925 | 1106.7085      | 1152.7139 | 1135.6874 | 1134.7034      | 1082.6721 |           | L    | 761.4192  | 760.4240  |          | 819.4975  | 802.4709  |
| 11 | 30.0338  | 1181.7405 | 1164.7139 | 1163.7299      | 1209.7354 | 1192.7089 | 1191.7248      |           |           | G    |           |           |          | 706.4134  | 689.3869  |
| 12 | 120.0808 | 1328.8089 | 1311.7824 | 1310.7983      | 1356.8038 | 1339.7773 | 1338.7933      |           |           | F    | 557.3293  |           |          | 649.3919  | 632.3654  |
| 13 | 86.0964  | 1441.8930 | 1424.8664 | 1423.8824      | 1469.8879 | 1452.8613 | 1451.8773      | 1399.8460 |           | L    | 444.2453  | 443.2500  |          | 502.3235  | 485.2970  |
| 14 | 86.0964  | 1554.9770 | 1537.9505 | 1536.9665      | 1582.9719 | 1565.9454 | 1564.9614      | 1526.9457 | 1540.9614 | I    | 331.1612  | 344.1816  | 358.1973 | 389.2395  | 372.2129  |
| 15 | 102.0550 | 1684.0196 | 1666.9931 | 1666.0091      | 1712.0145 | 1694.9880 | 1694.0040      | 1626.0141 |           | E    | 202.1186  | 201.1234  |          | 276.1554  | 259.1288  |
| 16 | 101.1073 |           |           |                |           |           |                |           |           | K    | 74.0237   | 73.0284   |          | 147.1128  | 130.0863  |

| Seq   | ya       | yb       | Seq    | ya       | yb       | Seq    | ya       | yb       |
|-------|----------|----------|--------|----------|----------|--------|----------|----------|
| RL    | 242.1975 | 270.1925 | RLL    | 355.2816 | 383.2765 | RLLF   | 502.3500 | 530.3449 |
| RLLFE | 631.3926 | 659.3875 | LL     | 199.1805 | 227.1754 | LLF    | 346.2489 | 374.2438 |
| LLFE  | 475.2915 | 503.2864 | LLFEV  | 574.3599 | 602.3548 | LLFEVA | 645.3970 | 673.3919 |
| LF    | 233.1648 | 261.1598 | LFE    | 362.2074 | 390.2023 | LFEV   | 461.2758 | 489.2708 |
| LFEVA | 532.3130 | 560.3079 | LFEVAP | 629.3657 | 657.3606 | FE     | 249.1234 | 277.1183 |

|        |          |          |         |          |          |        |          |          |
|--------|----------|----------|---------|----------|----------|--------|----------|----------|
| FEV    | 348.1918 | 376.1867 | FEVA    | 419.2289 | 447.2238 | FEVAP  | 516.2817 | 544.2766 |
| FEVAPL | 629.3657 | 657.3606 | FEVAPLG | 686.3872 | 714.3821 | EV     | 201.1234 | 229.1183 |
| EVA    | 272.1605 | 300.1554 | EVAP    | 369.2132 | 397.2082 | EVAPL  | 482.2973 | 510.2922 |
| EVAPLG | 539.3188 | 567.3137 | EVAPLGF | 686.3872 | 714.3821 | VA     | 143.1179 | 171.1128 |
| VAP    | 240.1707 | 268.1656 | VAPL    | 353.2547 | 381.2496 | VAPLG  | 410.2762 | 438.2711 |
| VAPLGF | 557.3446 | 585.3395 | VAPLGFL | 670.4287 | 698.4236 | AP     | 141.1022 | 169.0972 |
| APL    | 254.1863 | 282.1812 | APLG    | 311.2078 | 339.2027 | APLGF  | 458.2762 | 486.2711 |
| APLGFL | 571.3602 | 599.3552 | APLGFLI | 684.4443 | 712.4392 | PL     | 183.1492 | 211.1441 |
| PLG    | 240.1707 | 268.1656 | PLGF    | 387.2391 | 415.2340 | PLGFL  | 500.3231 | 528.3180 |
| PLGFLI | 613.4072 | 641.4021 | LG      | 143.1179 | 171.1128 | LGF    | 290.1863 | 318.1812 |
| LGFL   | 403.2704 | 431.2653 | LGFLI   | 516.3544 | 544.3493 | LGFLIE | 645.3970 | 673.3919 |
| GF     | 177.1022 | 205.0972 | GFL     | 290.1863 | 318.1812 | GFLI   | 403.2704 | 431.2653 |
| GFLIE  | 532.3130 | 560.3079 | FL      | 233.1648 | 261.1598 | FLI    | 346.2489 | 374.2438 |
| FLIE   | 475.2915 | 503.2864 | LI      | 199.1805 | 227.1754 | LIE    | 328.2231 | 356.2180 |
| IE     | 215.1390 | 243.1339 |         |          |          |        |          |          |

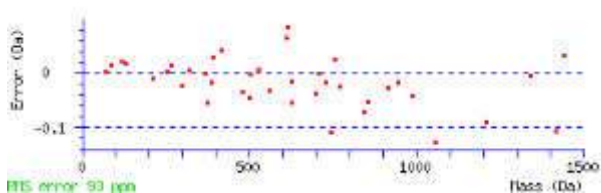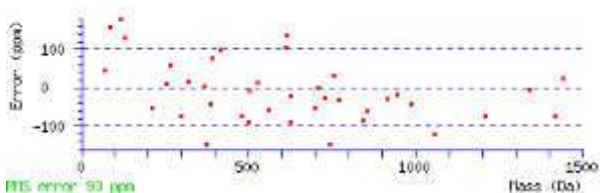

NCBI BLAST search of [LRLLEFVAPLGFLIEK](#)

(Parameters: blastp, nr protein database, expect=20000, no filter, PAM30)

Other BLAST [web gateways](#)

#### All matches to this query

| Score | M( <i>calc</i> ) | Delta   | Sequence                            |
|-------|------------------|---------|-------------------------------------|
| 6.6   | 1857.0823        | 0.0249  | <a href="#">SLTLLSLTSVNLGTIPK</a>   |
| 6.0   | 1857.0281        | 0.0791  | <a href="#">MGLLVKGGDVLESIGEIK</a>  |
| 5.1   | 1857.1128        | -0.0055 | <a href="#">LRLLEFVAPLGFLIEK</a>    |
| 4.2   | 1856.9605        | 0.1467  | <a href="#">RSQIVGNAVETGHASASR</a>  |
| 4.2   | 1856.9778        | 0.1294  | <a href="#">LADNMVOLGKEGTLAAAR</a>  |
| 4.0   | 1856.9592        | 0.1480  | <a href="#">ISEDVIDATERGNIR</a>     |
| 4.0   | 1857.0030        | 0.1043  | <a href="#">LKMEINGGVATPTASAVAK</a> |
| 4.0   | 1857.0207        | 0.0865  | <a href="#">RALQETSGVLVISDLEK</a>   |
| 4.0   | 1857.0935        | 0.0137  | <a href="#">VTEVIITTKLNAVSLR</a>    |
| 3.9   | 1856.9553        | 0.1519  | <a href="#">SLEVPAEGVELMLSDLR</a>   |

Mascot: <http://www.matrixscience.com/>

**MATRIX SCIENCE Mascot Search Results**

**Peptide View Spot no 53**

MS/MS Fragmentation of **ATFDNPEYNKLIDYYVK**

Found in **gi|118175929** in **NCBINr**, chloroplast sedoheptulose-1,7-bisphosphatase [*Morus alba* var. *multicaulis*]

Match to Query 90: 2091.987124 from(2092.994400,1+) intensity(0.0000) index(18)

Title: Label: H4, Spot\_Id: 219729, Peak\_List\_Id: 225335, MSMS Job\_Run\_Id: 21774, Comment:

Data file C:\Documents and Settings\Administrator\Desktop\farah BHU\spot set plate\Farah-Garima 11May 2013\ppw\_H4\_136842165600.txt

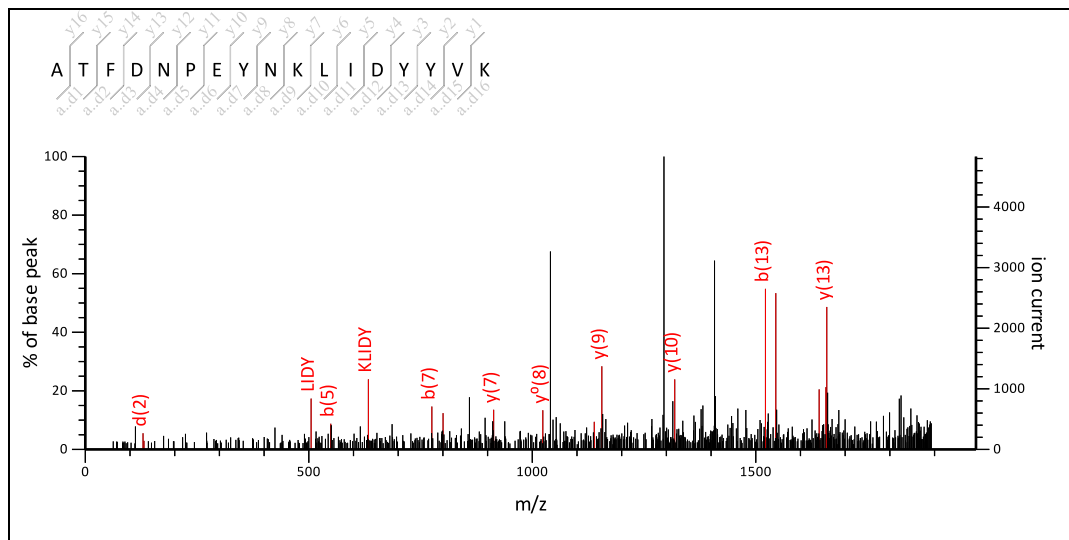

Navigation icons: Home, Back, Forward, Search, and a range input field from 0 to 1992.68.

Label all possible matches  Label matches used for scoring

Monoisotopic mass of neutral peptide Mr(calc): 2092.0153

Fixed modifications: Carbamidomethyl (C) (apply to specified residues or termini only)

Ions Score: 7 Expect: 2.4e+02

Matches : 17/292 fragment ions using 57 most intense peaks [\(help\)](#)

| #  | Immon.   | a         | a*        | a <sup>0</sup> | b         | b*        | b <sup>0</sup> | d         | d'        | Seq. | v         | w         | w'        | y         | y*        |
|----|----------|-----------|-----------|----------------|-----------|-----------|----------------|-----------|-----------|------|-----------|-----------|-----------|-----------|-----------|
| 1  | 44.0495  | 44.0495   |           |                | 72.0444   |           |                | 44.0495   |           | A    |           |           |           |           |           |
| 2  | 74.0600  | 145.0972  |           | 127.0866       | 173.0921  |           | 155.0815       | 129.1022  | 131.0815  | T    | 1975.9436 | 1988.9640 | 1990.9433 | 2021.9855 | 2004.9589 |
| 3  | 120.0808 | 292.1656  |           | 274.1550       | 320.1605  |           | 302.1499       |           |           | F    | 1828.8752 |           |           | 1920.9378 | 1903.9113 |
| 4  | 88.0393  | 407.1925  |           | 389.1819       | 435.1874  |           | 417.1769       | 363.2027  |           | D    | 1713.8483 | 1712.8530 |           | 1773.8694 | 1756.8428 |
| 5  | 87.0553  | 521.2354  | 504.2089  | 503.2249       | 549.2304  | 532.2038  | 531.2198       | 478.2296  |           | N    | 1599.8053 | 1598.8101 |           | 1658.8425 | 1641.8159 |
| 6  | 70.0651  | 618.2882  | 601.2617  | 600.2776       | 646.2831  | 629.2566  | 628.2726       | 592.2726  |           | P    | 1502.7526 | 1501.7573 |           | 1544.7995 | 1527.7730 |
| 7  | 102.0550 | 747.3308  | 730.3042  | 729.3202       | 775.3257  | 758.2992  | 757.3151       | 689.3253  |           | E    | 1373.7100 | 1372.7147 |           | 1447.7468 | 1430.7202 |
| 8  | 136.0757 | 910.3941  | 893.3676  | 892.3836       | 938.3890  | 921.3625  | 920.3785       |           |           | Y    | 1210.6467 |           |           | 1318.7042 | 1301.6776 |
| 9  | 87.0553  | 1024.4371 | 1007.4105 | 1006.4265      | 1052.4320 | 1035.4054 | 1034.4214      | 981.4312  |           | N    | 1096.6037 | 1095.6085 |           | 1155.6408 | 1138.6143 |
| 10 | 101.1073 | 1152.5320 | 1135.5055 | 1134.5214      | 1180.5269 | 1163.5004 | 1162.5164      | 1095.4742 |           | K    | 968.5088  | 967.5135  |           | 1041.5979 | 1024.5714 |
| 11 | 86.0964  | 1265.6161 | 1248.5895 | 1247.6055      | 1293.6110 | 1276.5844 | 1275.6004      | 1223.5691 |           | L    | 855.4247  | 854.4294  |           | 913.5029  | 896.4764  |
| 12 | 86.0964  | 1378.7001 | 1361.6736 | 1360.6896      | 1406.6951 | 1389.6685 | 1388.6845      | 1350.6688 | 1364.6845 | I    | 742.3406  | 755.3610  | 769.3767  | 800.4189  | 783.3923  |
| 13 | 88.0393  | 1493.7271 | 1476.7005 | 1475.7165      | 1521.7220 | 1504.6955 | 1503.7114      | 1449.7373 |           | D    | 627.3137  | 626.3184  |           | 687.3348  | 670.3083  |
| 14 | 136.0757 | 1656.7904 | 1639.7639 | 1638.7798      | 1684.7853 | 1667.7588 | 1666.7748      |           |           | Y    | 464.2504  |           |           | 572.3079  | 555.2813  |
| 15 | 136.0757 | 1819.8537 | 1802.8272 | 1801.8432      | 1847.8487 | 1830.8221 | 1829.8381      |           |           | Y    | 301.1870  |           |           | 409.2445  | 392.2180  |
| 16 | 72.0808  | 1918.9222 | 1901.8956 | 1900.9116      | 1946.9171 | 1929.8905 | 1928.9065      | 1904.9065 |           | V    | 202.1186  | 215.1390  |           | 246.1812  | 229.1547  |
| 17 | 101.1073 |           |           |                |           |           |                |           |           | K    | 74.0237   | 73.0284   |           | 147.1128  | 130.0863  |

| Seq   | ya       | yb       | Seq    | ya       | yb       | Seq   | ya       | yb       |
|-------|----------|----------|--------|----------|----------|-------|----------|----------|
| TF    | 221.1285 | 249.1234 | TFD    | 336.1554 | 364.1503 | TFDN  | 450.1983 | 478.1932 |
| TFDNP | 547.2511 | 575.2460 | TFDNPE | 676.2937 | 704.2886 | FD    | 235.1077 | 263.1026 |
| FDN   | 349.1506 | 377.1456 | FDNP   | 446.2034 | 474.1983 | FDNPE | 575.2460 | 603.2409 |
| DN    | 202.0822 | 230.0771 | DNP    | 299.1350 | 327.1299 | DNPE  | 428.1776 | 456.1725 |



|                       |          |                 |                       |          |          |                       |          |          |
|-----------------------|----------|-----------------|-----------------------|----------|----------|-----------------------|----------|----------|
| <a href="#">DNPEY</a> | 591.2409 | 619.2358        | <a href="#">NP</a>    | 184.1081 | 212.1030 | <a href="#">NPE</a>   | 313.1506 | 341.1456 |
| <a href="#">NPEY</a>  | 476.2140 | 504.2089        | <a href="#">NPEYN</a> | 590.2569 | 618.2518 | <a href="#">PE</a>    | 199.1077 | 227.1026 |
| <a href="#">PEY</a>   | 362.1710 | 390.1660        | <a href="#">PEYN</a>  | 476.2140 | 504.2089 | <a href="#">PEYNK</a> | 604.3089 | 632.3039 |
| <a href="#">EY</a>    | 265.1183 | 293.1132        | <a href="#">EYN</a>   | 379.1612 | 407.1561 | <a href="#">EYNK</a>  | 507.2562 | 535.2511 |
| <a href="#">EYNKL</a> | 620.3402 | 648.3352        | <a href="#">YN</a>    | 250.1186 | 278.1135 | <a href="#">YNK</a>   | 378.2136 | 406.2085 |
| <a href="#">YNKL</a>  | 491.2976 | 519.2926        | <a href="#">YNKLI</a> | 604.3817 | 632.3766 | <a href="#">NK</a>    | 215.1503 | 243.1452 |
| <a href="#">NKL</a>   | 328.2343 | 356.2292        | <a href="#">NKLI</a>  | 441.3184 | 469.3133 | <a href="#">NKLID</a> | 556.3453 | 584.3402 |
| <a href="#">KL</a>    | 214.1914 | 242.1863        | <a href="#">KLI</a>   | 327.2755 | 355.2704 | <a href="#">KLID</a>  | 442.3024 | 470.2973 |
| <a href="#">KLIDY</a> | 605.3657 | <b>633.3606</b> | <a href="#">LI</a>    | 199.1805 | 227.1754 | <a href="#">LID</a>   | 314.2074 | 342.2023 |
| <a href="#">LIDY</a>  | 477.2708 | <b>505.2657</b> | <a href="#">LIDYY</a> | 640.3341 | 668.3290 | <a href="#">ID</a>    | 201.1234 | 229.1183 |
| <a href="#">IDY</a>   | 364.1867 | 392.1816        | <a href="#">IDYY</a>  | 527.2500 | 555.2449 | <a href="#">IDYYV</a> | 626.3184 | 654.3134 |
| <a href="#">DY</a>    | 251.1026 | 279.0975        | <a href="#">DYY</a>   | 414.1660 | 442.1609 | <a href="#">DYYV</a>  | 513.2344 | 541.2293 |
| <a href="#">YY</a>    | 299.1390 | 327.1339        | <a href="#">YVV</a>   | 398.2074 | 426.2023 | <a href="#">YV</a>    | 235.1441 | 263.1390 |

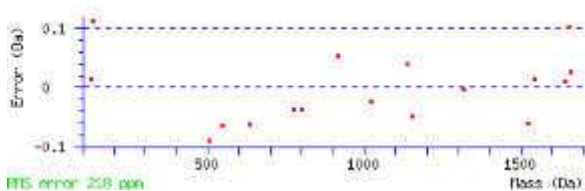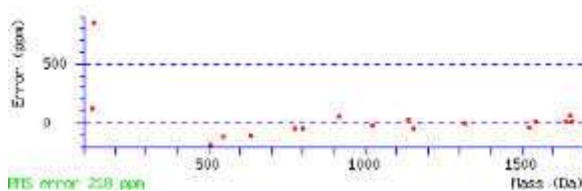

NCBI BLAST search of [ATFDNPEYDKLINYYVK](#)

(Parameters: blastp, nr protein database, expect=20000, no filter, PAM30)

Other BLAST [web gateways](#)

#### All matches to this query

| Score | Mr(calcd) | Delta   | Sequence                               |
|-------|-----------|---------|----------------------------------------|
| 21.3  | 2092.0153 | -0.0282 | <a href="#">ATFDNPEYDKLINYYVK</a>      |
| 9.5   | 2092.0153 | -0.0282 | <a href="#">ATFDNPDYEKLINYYVK</a>      |
| 8.8   | 2092.0598 | -0.0726 | <a href="#">MPRVWLDYLOLLMDQR</a>       |
| 7.4   | 2092.0153 | -0.0282 | <a href="#">ATFDNPEYDKLINYYVK</a>      |
| 4.4   | 2091.9305 | 0.0566  | <a href="#">QOPSGPGSDGAATSNSTAASSK</a> |
| 4.1   | 2092.0623 | -0.0752 | <a href="#">VIAEDTGIHSTGPSISHLMK</a>   |
| 3.0   | 2091.9618 | 0.0253  | <a href="#">MRFNYNNIGSSIGEFMGR</a>     |
| 2.7   | 2092.1099 | -0.1228 | <a href="#">RNVSVAMVLSSTPLNVSFR</a>    |
| 2.7   | 2092.0701 | -0.0830 | <a href="#">DALTPRLDADELNHFLR</a>      |
| 2.5   | 2092.0636 | -0.0765 | <a href="#">LNOLKCHTADLLHPYNR</a>      |

Mascot: <http://www.matrixscience.com/>



**MATRIX SCIENCE Mascot Search Results**

**Peptide View Spot no 56**

**MS/MS Fragmentation of KLTCSPYGIK**

Found in **gi|125580** in **NCBIInr**, RecName: Full=Phosphoribulokinase, chloroplastic; Short=PRK; Short=PRKase; AltName: Full=Phosphopentokinase; Flags: Precursor

Match to Query 2: 1165.594024 from(1166.601300,1+) intensity(0.0000) index(1)

Title: Label: I4, Spot\_Id: 219730, Peak\_List\_Id: 225358, MSMS Job\_Run\_Id: 21775, Comment:

Data file C:\Documents and Settings\Administrator\Desktop\farah BHU\spot set plate\Farah-Garima 11May 2013\ppw\_I4\_136842168700.txt

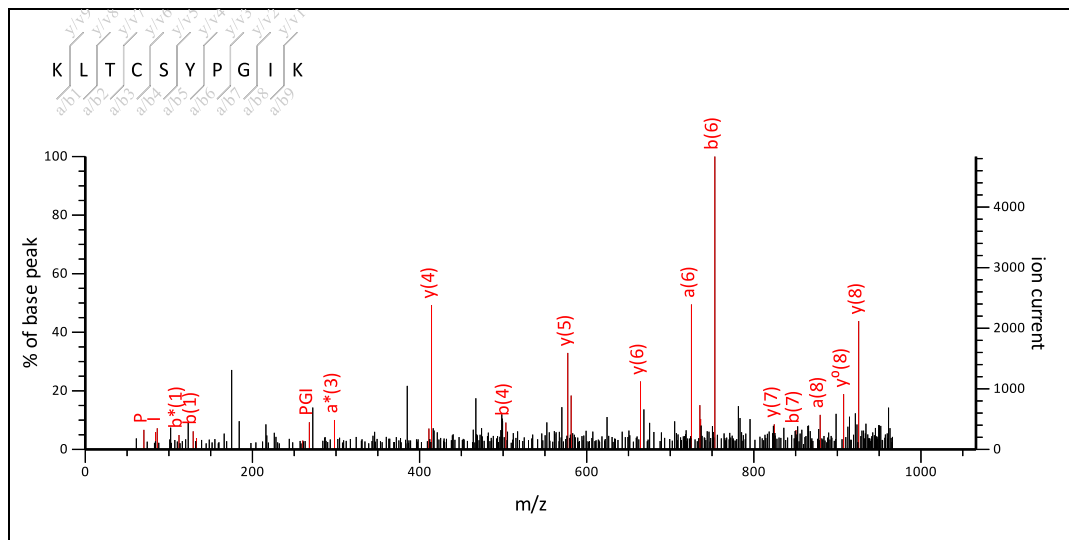

Navigation icons: Home, Back, Forward, Search, Print, etc. Range: 0 to 1065.85

Label all possible matches  Label matches used for scoring

Monoisotopic mass of neutral peptide Mr(calc): 1165.6165

Fixed modifications: Carbamidomethyl (C) (apply to specified residues or termini only)

Ions Score: 17 Expect: 41

Matches : 27/157 fragment ions using 86 most intense peaks [\(help\)](#)

| #  | Immon.   | a        | a*       | a <sup>0</sup> | b         | b*        | b <sup>0</sup> | d        | d'       | Seq. | v        | w        | w'       | y         | y*        | y <sup>0</sup> |
|----|----------|----------|----------|----------------|-----------|-----------|----------------|----------|----------|------|----------|----------|----------|-----------|-----------|----------------|
| 1  | 101.1073 | 101.1073 | 84.0808  |                | 129.1022  | 112.0757  |                | 44.0495  |          | K    |          |          |          |           |           |                |
| 2  | 86.0964  | 214.1914 | 197.1648 |                | 242.1863  | 225.1598  |                | 172.1444 |          | L    | 980.4506 | 979.4553 |          | 1038.5288 | 1021.5023 | 1020.5183      |
| 3  | 74.0600  | 315.2391 | 298.2125 | 297.2285       | 343.2340  | 326.2074  | 325.2234       | 299.2442 | 301.2234 | T    | 879.4029 | 892.4233 | 894.4026 | 925.4448  | 908.4182  | 907.4342       |
| 4  | 133.0430 | 475.2697 | 458.2432 | 457.2592       | 503.2646  | 486.2381  | 485.2541       | 386.2762 |          | C    | 719.3723 | 718.3770 |          | 824.3971  | 807.3706  | 806.3865       |
| 5  | 60.0444  | 562.3017 | 545.2752 | 544.2912       | 590.2967  | 573.2701  | 572.2861       | 546.3068 |          | S    | 632.3402 | 631.3450 |          | 664.3665  | 647.3399  | 646.3559       |
| 6  | 136.0757 | 725.3651 | 708.3385 | 707.3545       | 753.3600  | 736.3334  | 735.3494       |          |          | Y    | 469.2769 |          |          | 577.3344  | 560.3079  |                |
| 7  | 70.0651  | 822.4178 | 805.3913 | 804.4073       | 850.4128  | 833.3862  | 832.4022       | 796.4022 |          | P    | 372.2241 | 371.2289 |          | 414.2711  | 397.2445  |                |
| 8  | 30.0338  | 879.4393 | 862.4128 | 861.4287       | 907.4342  | 890.4077  | 889.4237       |          |          | G    |          |          |          | 317.2183  | 300.1918  |                |
| 9  | 86.0964  | 992.5234 | 975.4968 | 974.5128       | 1020.5183 | 1003.4917 | 1002.5077      | 964.4921 | 978.5077 | I    | 202.1186 | 215.1390 | 229.1547 | 260.1969  | 243.1703  |                |
| 10 | 101.1073 |          |          |                |           |           |                |          |          | K    | 74.0237  | 73.0284  |          | 147.1128  | 130.0863  |                |

| Seq    | ya       | yb       | Seq    | ya       | yb       | Seq   | ya       | yb       |
|--------|----------|----------|--------|----------|----------|-------|----------|----------|
| LT     | 187.1441 | 215.1390 | LTC    | 347.1748 | 375.1697 | LTCS  | 434.2068 | 462.2017 |
| LTCSY  | 597.2701 | 625.2650 | LTCSYP | 694.3229 | 722.3178 | TC    | 234.0907 | 262.0856 |
| TCS    | 321.1227 | 349.1176 | TCSY   | 484.1860 | 512.1810 | TCSYP | 581.2388 | 609.2337 |
| TCSYPG | 638.2603 | 666.2552 | CS     | 220.0750 | 248.0700 | CSY   | 383.1384 | 411.1333 |
| CSYP   | 480.1911 | 508.1860 | CSYPG  | 537.2126 | 565.2075 | CSYPI | 650.2967 | 678.2916 |
| SY     | 223.1077 | 251.1026 | SYP    | 320.1605 | 348.1554 | SYPG  | 377.1819 | 405.1769 |
| SYPI   | 490.2660 | 518.2609 | YP     | 233.1285 | 261.1234 | YPG   | 290.1499 | 318.1448 |
| YPI    | 403.2340 | 431.2289 | PG     | 127.0866 | 155.0815 | PGI   | 240.1707 | 268.1656 |
| GI     | 143.1179 | 171.1128 |        |          |          |       |          |          |

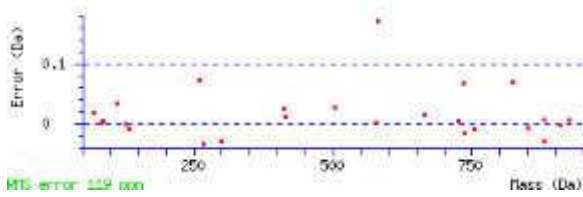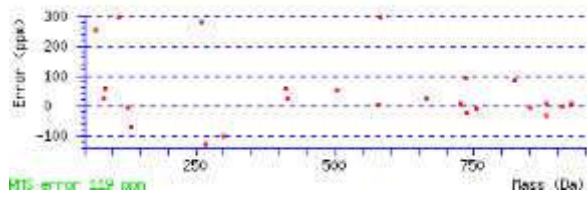

NCBI **BLAST** search of [KLTCSYPGIK](#)

(Parameters: blastp, nr protein database, expect=20000, no filter, PAM30)

Other BLAST [web gateways](#)

**All matches to this query**

| Score | Mr(calc)  | Delta   | Sequence                     |
|-------|-----------|---------|------------------------------|
| 18.6  | 1165.6819 | -0.0878 | <a href="#">KILPTEAAAPR</a>  |
| 17.3  | 1165.6165 | -0.0225 | <a href="#">KLTCSYPGIK</a>   |
| 16.3  | 1165.6026 | -0.0086 | <a href="#">QLPKCPGNPR</a>   |
| 15.9  | 1165.6819 | -0.0879 | <a href="#">NDGVGLLLPR</a>   |
| 15.4  | 1165.6316 | -0.0376 | <a href="#">LAGSGQRQPPR</a>  |
| 15.4  | 1165.7070 | -0.1130 | <a href="#">TNLPLITAPVK</a>  |
| 14.5  | 1165.6819 | -0.0879 | <a href="#">AIGQALEVIPR</a>  |
| 14.5  | 1165.6819 | -0.0879 | <a href="#">AVAQALEVIPR</a>  |
| 14.3  | 1165.5550 | 0.0390  | <a href="#">MAAAAAGDAVFR</a> |
| 14.2  | 1165.6819 | -0.0879 | <a href="#">GAQEAIVLLPR</a>  |

Mascot: <http://www.matrixscience.com/>

**MATRIX SCIENCE Mascot Search Results**

**Peptide View Spot no 56**

**MS/MS Fragmentation of DLYEQIAER**

Found in **gi|125580** in **NCBI nr**, RecName: Full=Phosphoribulokinase, chloroplastic; Short=PRK; Short=PRKase; AltName: Full=Phosphopentokinase; Flags: Precursor

Match to Query 4: 1248.615624 from(1249.622900,1+) intensity(0.0000) index(3)

Title: Label: I4, Spot\_Id: 219730, Peak\_List\_Id: 225357, MSMS Job\_Run\_Id: 21775, Comment:

Data file C:\Documents and Settings\Administrator\Desktop\farah BHU\spot set plate\Farah-Garima 11May 2013\ppw\_I4\_136842168700.txt

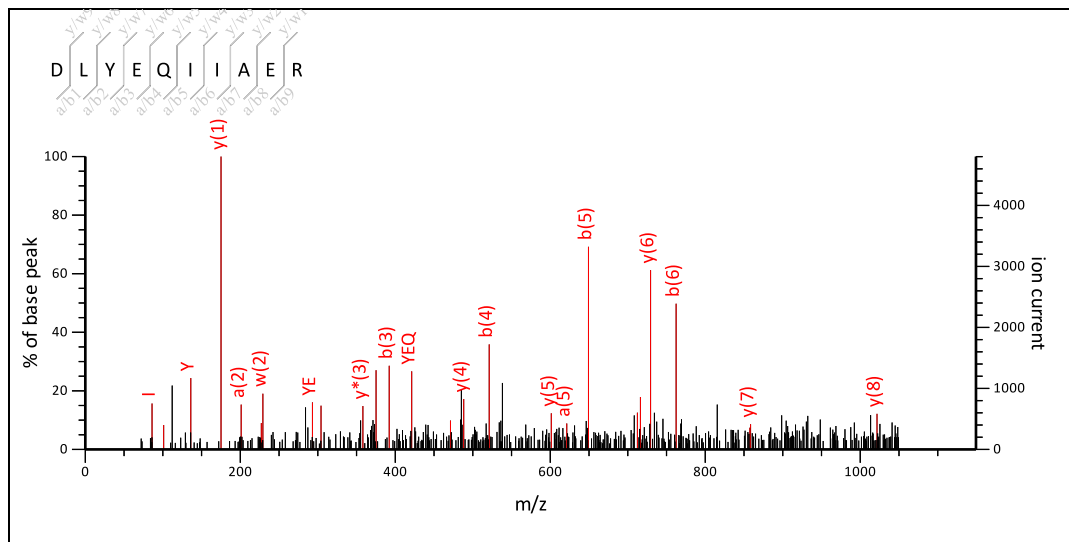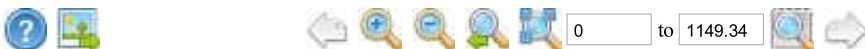

Label all possible matches  Label matches used for scoring

Monoisotopic mass of neutral peptide Mr(calc): 1248.6350

Fixed modifications: Carbamidomethyl (C) (apply to specified residues or termini only)

Ions Score: 55 Expect: 0.0077

Matches : 31/156 fragment ions using 40 most intense peaks (help)

| #  | Immon.   | a         | a*        | a <sup>0</sup> | b         | b*        | b <sup>0</sup> | d        | d'       | Seq. | v         | w         | w'       | y         | y*        | y     |
|----|----------|-----------|-----------|----------------|-----------|-----------|----------------|----------|----------|------|-----------|-----------|----------|-----------|-----------|-------|
| 1  | 88.0393  | 88.0393   |           | 70.0287        | 116.0342  |           | 98.0237        | 44.0495  |          | D    |           |           |          |           |           |       |
| 2  | 86.0964  | 201.1234  |           | 183.1128       | 229.1183  |           | 211.1077       | 159.0764 |          | L    | 1076.5371 | 1075.5419 |          | 1134.6154 | 1117.5888 | 1116. |
| 3  | 136.0757 | 364.1867  |           | 346.1761       | 392.1816  |           | 374.1710       |          |          | Y    | 913.4738  |           |          | 1021.5313 | 1004.5047 | 1003. |
| 4  | 102.0550 | 493.2293  |           | 475.2187       | 521.2242  |           | 503.2136       | 435.2238 |          | E    | 784.4312  | 783.4359  |          | 858.4680  | 841.4414  | 840.  |
| 5  | 101.0709 | 621.2879  | 604.2613  | 603.2773       | 649.2828  | 632.2562  | 631.2722       | 564.2664 |          | Q    | 656.3726  | 655.3774  |          | 729.4254  | 712.3988  | 711.  |
| 6  | 86.0964  | 734.3719  | 717.3454  | 716.3614       | 762.3668  | 745.3403  | 744.3563       | 706.3406 | 720.3563 | I    | 543.2885  | 556.3089  | 570.3246 | 601.3668  | 584.3402  | 583.  |
| 7  | 86.0964  | 847.4560  | 830.4294  | 829.4454       | 875.4509  | 858.4244  | 857.4403       | 819.4247 | 833.4403 | I    | 430.2045  | 443.2249  | 457.2405 | 488.2827  | 471.2562  | 470.  |
| 8  | 44.0495  | 918.4931  | 901.4666  | 900.4825       | 946.4880  | 929.4615  | 928.4775       |          |          | A    | 359.1674  |           |          | 375.1987  | 358.1721  | 357.  |
| 9  | 102.0550 | 1047.5357 | 1030.5092 | 1029.5251      | 1075.5306 | 1058.5041 | 1057.5201      | 989.5302 |          | E    | 230.1248  | 229.1295  |          | 304.1615  | 287.1350  | 286.  |
| 10 | 129.1135 |           |           |                |           |           |                |          |          | R    | 74.0237   | 73.0284   |          | 175.1190  | 158.0924  |       |

| Seq   | ya       | yb       | Seq    | ya       | yb       | Seq    | ya       | yb       |
|-------|----------|----------|--------|----------|----------|--------|----------|----------|
| LY    | 249.1598 | 277.1547 | LYE    | 378.2023 | 406.1973 | LYEQ   | 506.2609 | 534.2558 |
| LYEQI | 619.3450 | 647.3399 | YE     | 265.1183 | 293.1132 | YEQ    | 393.1769 | 421.1718 |
| YEQI  | 506.2609 | 534.2558 | YEQII  | 619.3450 | 647.3399 | YEQIIA | 690.3821 | 718.3770 |
| EQ    | 230.1135 | 258.1084 | EQI    | 343.1976 | 371.1925 | EQII   | 456.2817 | 484.2766 |
| EQIIA | 527.3188 | 555.3137 | EQIIAE | 656.3614 | 684.3563 | QI     | 214.1550 | 242.1499 |
| QII   | 327.2391 | 355.2340 | QIIA   | 398.2762 | 426.2711 | QIIAE  | 527.3188 | 555.3137 |
| II    | 199.1805 | 227.1754 | IIA    | 270.2176 | 298.2125 | IIAE   | 399.2602 | 427.2551 |
| IA    | 157.1335 | 185.1285 | IAE    | 286.1761 | 314.1710 | AE     | 173.0921 | 201.0870 |

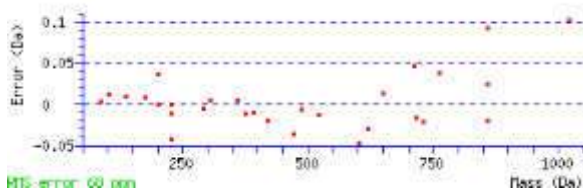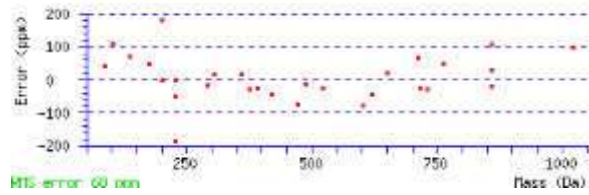

NCBI **BLAST** search of [DLYEQIIAER](#)

(Parameters: blastp, nr protein database, expect=20000, no filter, PAM30)

Other BLAST [web gateways](#)

**All matches to this query**

| Score | Mr(calc)  | Delta   | Sequence                    |
|-------|-----------|---------|-----------------------------|
| 54.8  | 1248.6350 | -0.0194 | <a href="#">DLYEQIIAER</a>  |
| 25.2  | 1248.6285 | -0.0129 | <a href="#">LFVQLOEGCR</a>  |
| 20.3  | 1248.6714 | -0.0557 | <a href="#">LDYLLEKAER</a>  |
| 19.8  | 1248.6714 | -0.0557 | <a href="#">EYEVKLAELR</a>  |
| 18.6  | 1248.5267 | 0.0889  | <a href="#">IDYCCYTVR</a>   |
| 17.2  | 1248.6649 | -0.0492 | <a href="#">WTSLLQKMAR</a>  |
| 16.1  | 1248.6132 | 0.0024  | <a href="#">DDMRDLILSR</a>  |
| 15.9  | 1248.6462 | -0.0306 | <a href="#">DIEYVRGELR</a>  |
| 15.9  | 1248.5834 | 0.0323  | <a href="#">DSSDEDLLISR</a> |
| 15.3  | 1248.6318 | -0.0162 | <a href="#">MDMVRLAER</a>   |

Mascot: <http://www.matrixscience.com/>

**MATRIX SCIENCE Mascot Search Results**

**Peptide View Spot no 56**

MS/MS Fragmentation of **FYGEVTQQLK**

Found in **gi|125580** in **NCBI nr**, RecName: Full=Phosphoribulokinase, chloroplastic; Short=PRK; Short=PRKase; AltName: Full=Phosphopentokinase; Flags: Precursor

Match to Query 7: 1358.616524 from(1359.623800,1+) intensity(0.0000) index(6)

Title: Label: I4, Spot\_Id: 219730, Peak\_List\_Id: 225348, MSMS Job\_Run\_Id: 21775, Comment:

Data file C:\Documents and Settings\Administrator\Desktop\farah BHU\spot set plate\Farah-Garima 11May 2013\ppw\_I4\_136842168700.txt

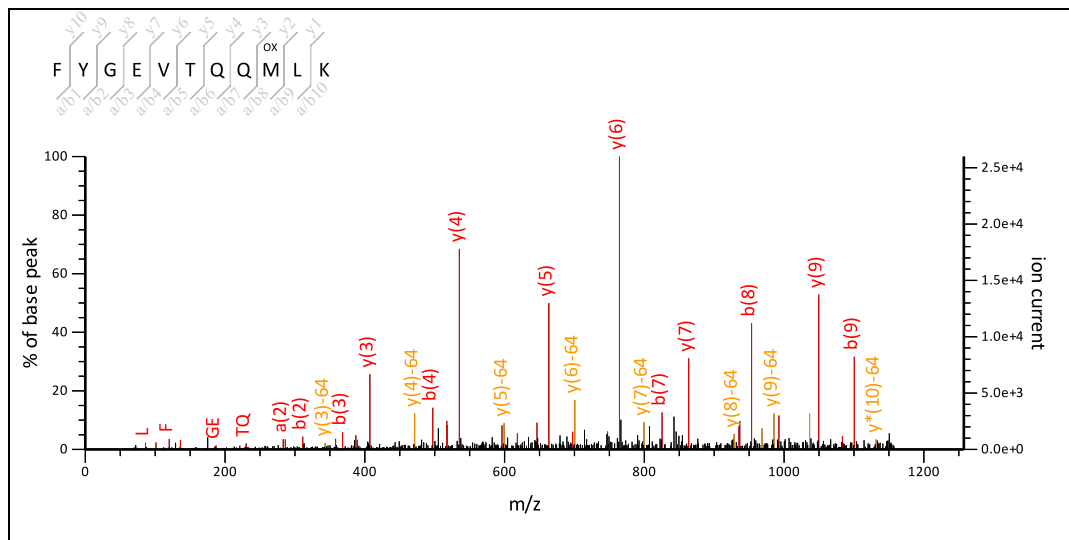

Navigation icons: Home, Back, Forward, Search, Print, Refresh. Search range: 0 to 1257.23.

Label all possible matches  Label matches used for scoring

Monoisotopic mass of neutral peptide Mr(calc): 1358.6540

Fixed modifications: Carbamidomethyl (C) (apply to specified residues or termini only)

Variable modifications:

M9 : Oxidation (M), with neutral losses 0.0000 (shown in table), 63.9983

Ions Score: 58 Expect: 0.0027

Matches : 50/226 fragment ions using 57 most intense peaks (help)

| #  | Immon.   | a         | a*        | a <sup>0</sup> | b         | b*        | b <sup>0</sup> | d         | d'       | Seq. | v         | w        | w'       | y         | y*        | y     |
|----|----------|-----------|-----------|----------------|-----------|-----------|----------------|-----------|----------|------|-----------|----------|----------|-----------|-----------|-------|
| 1  | 120.0808 | 120.0808  |           |                | 148.0757  |           |                | 44.0495   |          | F    |           |          |          |           |           |       |
| 2  | 136.0757 | 283.1441  |           |                | 311.1390  |           |                |           |          | Y    | 1104.5354 |          |          | 1212.5929 | 1195.5664 | 1194. |
| 3  | 30.0338  | 340.1656  |           |                | 368.1605  |           |                |           |          | G    |           |          |          | 1049.5296 | 1032.5030 | 1031. |
| 4  | 102.0550 | 469.2082  |           | 451.1976       | 497.2031  |           | 479.1925       | 411.2027  |          | E    | 918.4713  | 917.4761 |          | 992.5081  | 975.4816  | 974.  |
| 5  | 72.0808  | 568.2766  |           | 550.2660       | 596.2715  |           | 578.2609       | 554.2609  |          | V    | 819.4029  | 832.4233 |          | 863.4655  | 846.4390  | 845.  |
| 6  | 74.0600  | 669.3243  |           | 651.3137       | 697.3192  |           | 679.3086       | 653.3293  | 655.3086 | T    | 718.3552  | 731.3756 | 733.3549 | 764.3971  | 747.3706  | 746.  |
| 7  | 101.0709 | 797.3828  | 780.3563  | 779.3723       | 825.3777  | 808.3512  | 807.3672       | 740.3614  |          | Q    | 590.2967  | 589.3014 |          | 663.3494  | 646.3229  |       |
| 8  | 101.0709 | 925.4414  | 908.4149  | 907.4308       | 953.4363  | 936.4098  | 935.4258       | 868.4199  |          | Q    | 462.2381  | 461.2428 |          | 535.2908  | 518.2643  |       |
| 9  | 120.0478 | 1072.4768 | 1055.4503 | 1054.4662      | 1100.4717 | 1083.4452 | 1082.4612      | 996.4785  |          | M    | 315.2027  | 314.2074 |          | 407.2323  | 390.2057  |       |
| 10 | 86.0964  | 1185.5609 | 1168.5343 | 1167.5503      | 1213.5558 | 1196.5292 | 1195.5452      | 1143.5139 |          | L    | 202.1186  | 201.1234 |          | 260.1969  | 243.1703  |       |
| 11 | 101.1073 |           |           |                |           |           |                |           |          | K    | 74.0237   | 73.0284  |          | 147.1128  | 130.0863  |       |

| Seq    | ya       | yb       | Seq    | ya       | yb       | Seq   | ya       | yb       |
|--------|----------|----------|--------|----------|----------|-------|----------|----------|
| YG     | 193.0972 | 221.0921 | YGE    | 322.1397 | 350.1347 | YGEV  | 421.2082 | 449.2031 |
| YGEVT  | 522.2558 | 550.2508 | YGEVTQ | 650.3144 | 678.3093 | GE    | 159.0764 | 187.0713 |
| GEV    | 258.1448 | 286.1397 | GEVT   | 359.1925 | 387.1874 | GEVTQ | 487.2511 | 515.2460 |
| GEVTQQ | 615.3097 | 643.3046 | EV     | 201.1234 | 229.1183 | EVT   | 302.1710 | 330.1660 |
| EVTQ   | 430.2296 | 458.2245 | EVTQQ  | 558.2882 | 586.2831 | VT    | 173.1285 | 201.1234 |
| VTQ    | 301.1870 | 329.1819 | VTQQ   | 429.2456 | 457.2405 | VTQQM | 576.2810 | 604.2759 |
| VTQQML | 689.3651 | 717.3600 | TQ     | 202.1186 | 230.1135 | TQQ   | 330.1772 | 358.1721 |
| TQQM   | 477.2126 | 505.2075 | TQQML  | 590.2967 | 618.2916 | QQ    | 229.1295 | 257.1244 |
| QQM    | 376.1649 | 404.1598 | QQML   | 489.2490 | 517.2439 | QM    | 248.1063 | 276.1013 |

|            |          |                 |           |          |          |  |  |  |
|------------|----------|-----------------|-----------|----------|----------|--|--|--|
| <b>QML</b> | 361.1904 | <b>389.1853</b> | <b>ML</b> | 233.1318 | 261.1267 |  |  |  |
|------------|----------|-----------------|-----------|----------|----------|--|--|--|

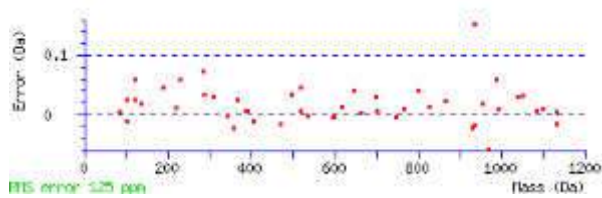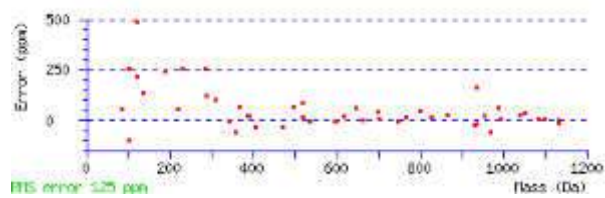

NCBI BLAST search of [FYGEVTOOMLK](#)

(Parameters: blastp, nr protein database, expect=20000, no filter, PAM30)

Other BLAST [web gateways](#)

**All matches to this query**

| Score | Mr(calcd) | Delta   | Sequence                     |
|-------|-----------|---------|------------------------------|
| 58.3  | 1358.6540 | -0.0375 | <a href="#">FYGEVTOOMLK</a>  |
| 17.7  | 1358.5674 | 0.0492  | <a href="#">MDGDFEGGRFGR</a> |
| 15.9  | 1358.6302 | -0.0137 | <a href="#">CVFSHHGEVNR</a>  |
| 15.1  | 1358.7089 | -0.0923 | <a href="#">DKPVRTOISCR</a>  |
| 14.4  | 1358.6844 | -0.0678 | <a href="#">YIHDAPQRFGR</a>  |
| 13.8  | 1358.7041 | -0.0876 | <a href="#">GQSLEVVEELTR</a> |
| 13.7  | 1358.6976 | -0.0811 | <a href="#">LAQIAVEKDCGR</a> |
| 13.4  | 1358.7095 | -0.0930 | <a href="#">YTIGYVARGFGR</a> |
| 13.2  | 1358.6904 | -0.0739 | <a href="#">WLGIEEPQLMK</a>  |
| 13.1  | 1358.6765 | -0.0600 | <a href="#">AGTLPHEMERGK</a> |

Mascot: <http://www.matrixscience.com/>


**Mascot Search Results**
**Peptide View** Spot no 56

 MS/MS Fragmentation of **KPDFDAFIDPQK**

 Found in **gi|125580** in **NCBInr**, RecName: Full=Phosphoribulokinase, chloroplastic; Short=PRK; Short=PRKase; AltName: Full=Phosphopentokinase; Flags: Precursor

Match to Query 8: 1419.661524 from(1420.668800,1+) intensity(0.0000) index(7)

Title: Label: I4, Spot\_Id: 219730, Peak\_List\_Id: 225353, MSMS Job\_Run\_Id: 21775, Comment:

Data file C:\Documents and Settings\Administrator\Desktop\farah BHU\spot set plate\Farah-Garima 11May 2013\ppw\_I4\_136842168700.txt

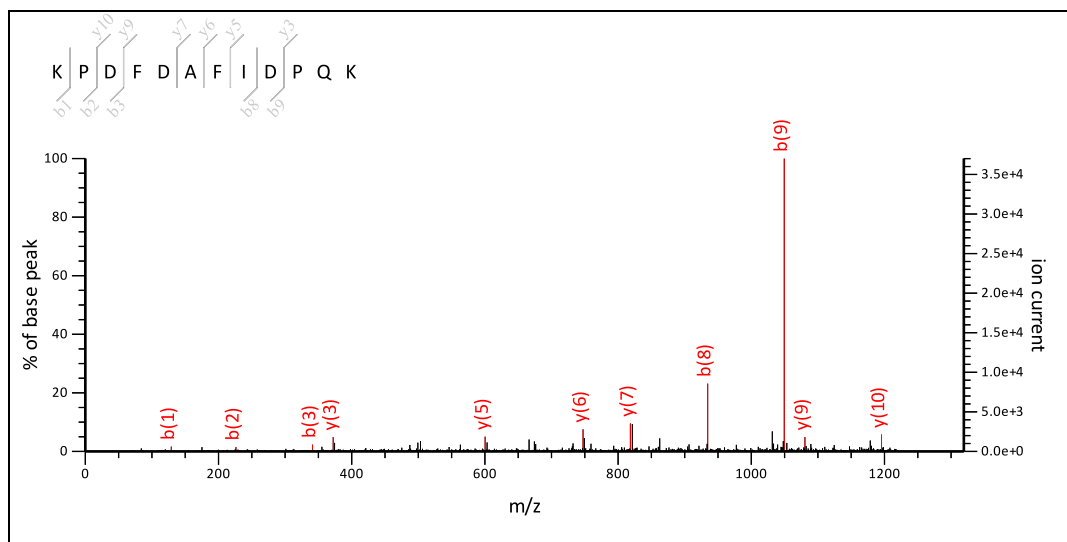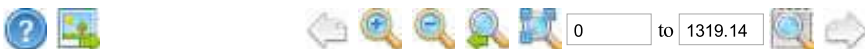
 Label all possible matches  Label matches used for scoring 

Monoisotopic mass of neutral peptide Mr(calc): 1419.7034

Fixed modifications: Carbamidomethyl (C) (apply to specified residues or termini only)

Ions Score: 63 Expect: 0.001

 Matches : 13/201 fragment ions using 12 most intense peaks ([help](#))

| #  | Immon.   | a         | a*        | a <sup>0</sup> | b         | b*        | b <sup>0</sup> | d         | d'       | Seq. | v         | w         | w'       | y         | y*        |
|----|----------|-----------|-----------|----------------|-----------|-----------|----------------|-----------|----------|------|-----------|-----------|----------|-----------|-----------|
| 1  | 101.1073 | 101.1073  | 84.0808   |                | 129.1022  | 112.0757  |                | 44.0495   |          | K    |           |           |          |           |           |
| 2  | 70.0651  | 198.1601  | 181.1335  |                | 226.1550  | 209.1285  |                | 172.1444  |          | P    | 1250.5688 | 1249.5735 |          | 1292.6157 | 1275.5892 |
| 3  | 88.0393  | 313.1870  | 296.1605  | 295.1765       | 341.1819  | 324.1554  | 323.1714       | 269.1972  |          | D    | 1135.5419 | 1134.5466 |          | 1195.5630 | 1178.5364 |
| 4  | 120.0808 | 460.2554  | 443.2289  | 442.2449       | 488.2504  | 471.2238  | 470.2398       |           |          | F    | 988.4734  |           |          | 1080.5360 | 1063.5095 |
| 5  | 88.0393  | 575.2824  | 558.2558  | 557.2718       | 603.2773  | 586.2508  | 585.2667       | 531.2926  |          | D    | 873.4465  | 872.4512  |          | 933.4676  | 916.4411  |
| 6  | 44.0495  | 646.3195  | 629.2930  | 628.3089       | 674.3144  | 657.2879  | 656.3039       |           |          | A    | 802.4094  |           |          | 818.4407  | 801.4141  |
| 7  | 120.0808 | 793.3879  | 776.3614  | 775.3774       | 821.3828  | 804.3563  | 803.3723       |           |          | F    | 655.3410  |           |          | 747.4036  | 730.3770  |
| 8  | 86.0964  | 906.4720  | 889.4454  | 888.4614       | 934.4669  | 917.4403  | 916.4563       | 878.4407  | 892.4563 | I    | 542.2569  | 555.2773  | 569.2930 | 600.3352  | 583.3086  |
| 9  | 88.0393  | 1021.4989 | 1004.4724 | 1003.4884      | 1049.4938 | 1032.4673 | 1031.4833      | 977.5091  |          | D    | 427.2300  | 426.2347  |          | 487.2511  | 470.2245  |
| 10 | 70.0651  | 1118.5517 | 1101.5251 | 1100.5411      | 1146.5466 | 1129.5201 | 1128.5360      | 1092.5360 |          | P    | 330.1772  | 329.1819  |          | 372.2241  | 355.1976  |
| 11 | 101.0709 | 1246.6103 | 1229.5837 | 1228.5997      | 1274.6052 | 1257.5786 | 1256.5946      | 1189.5888 |          | Q    | 202.1186  | 201.1234  |          | 275.1714  | 258.1448  |
| 12 | 101.1073 |           |           |                |           |           |                |           |          | K    | 74.0237   | 73.0284   |          | 147.1128  | 130.0863  |

| Seq    | ya       | yb       | Seq    | ya       | yb       | Seq    | ya       | yb       |
|--------|----------|----------|--------|----------|----------|--------|----------|----------|
| PD     | 185.0921 | 213.0870 | PDF    | 332.1605 | 360.1554 | PDFD   | 447.1874 | 475.1823 |
| PDFDA  | 518.2245 | 546.2195 | PDFDAF | 665.2930 | 693.2879 | DF     | 235.1077 | 263.1026 |
| DFD    | 350.1347 | 378.1296 | DFDA   | 421.1718 | 449.1667 | DFDAF  | 568.2402 | 596.2351 |
| DFDAFI | 681.3243 | 709.3192 | FD     | 235.1077 | 263.1026 | FDA    | 306.1448 | 334.1397 |
| FDAF   | 453.2132 | 481.2082 | FDAFI  | 566.2973 | 594.2922 | FDAFID | 681.3243 | 709.3192 |
| DA     | 159.0764 | 187.0713 | DAF    | 306.1448 | 334.1397 | DAFI   | 419.2289 | 447.2238 |
| DAFID  | 534.2558 | 562.2508 | DAFIDP | 631.3086 | 659.3035 | AF     | 191.1179 | 219.1128 |
| AFI    | 304.2020 | 332.1969 | AFID   | 419.2289 | 447.2238 | AFIDP  | 516.2817 | 544.2766 |
| AFIDPQ | 644.3402 | 672.3352 | FI     | 233.1648 | 261.1598 | FID    | 348.1918 | 376.1867 |



|             |          |                 |              |          |                 |           |          |          |
|-------------|----------|-----------------|--------------|----------|-----------------|-----------|----------|----------|
| <b>FIDP</b> | 445.2445 | 473.2395        | <b>FIDPQ</b> | 573.3031 | 601.2980        | <b>ID</b> | 201.1234 | 229.1183 |
| <b>IDP</b>  | 298.1761 | 326.1710        | <b>IDPQ</b>  | 426.2347 | 454.2296        | <b>DP</b> | 185.0921 | 213.0870 |
| <b>DPQ</b>  | 313.1506 | <b>341.1456</b> | <b>PQ</b>    | 198.1237 | <b>226.1186</b> |           |          |          |

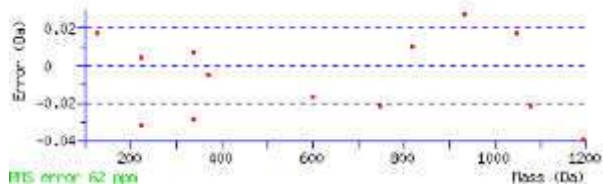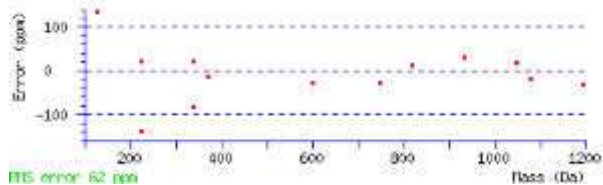

NCBI BLAST search of [KPDEFDAFIDPQK](#)

(Parameters: blastp, nr protein database, expect=20000, no filter, PAM30)

Other BLAST [web gateways](#)

#### All matches to this query

| Score | Mr(calc)  | Delta   | Sequence                        |
|-------|-----------|---------|---------------------------------|
| 63.0  | 1419.7034 | -0.0419 | <a href="#">KPDEFDAFIDPQK</a>   |
| 22.0  | 1419.6001 | 0.0614  | <a href="#">ELEDLEESDEGR</a>    |
| 17.7  | 1419.7214 | -0.0599 | <a href="#">AGTAAMNSVVMPPK</a>  |
| 15.4  | 1419.6452 | 0.0163  | <a href="#">ELEDNMWAEKR</a>     |
| 15.2  | 1419.7180 | -0.0565 | <a href="#">KGGMGTAAGDLAFPK</a> |
| 14.8  | 1419.7066 | -0.0451 | <a href="#">SGLNSTSGGESRLR</a>  |
| 14.3  | 1419.6776 | -0.0161 | <a href="#">RNSSASISDMQPK</a>   |
| 14.3  | 1419.7214 | -0.0599 | <a href="#">AGTAAMNSVVMPPK</a>  |
| 13.5  | 1419.7027 | -0.0412 | <a href="#">SVANDLEMELKR</a>    |
| 12.8  | 1419.5862 | 0.0753  | <a href="#">KGGEGGEGGGDEESR</a> |

Mascot: <http://www.matrixscience.com/>

**MATRIX SCIENCE Mascot Search Results**

**Peptide View Spot no 56**

MS/MS Fragmentation of **ANFDLMEYQVK**

Found in **gi|125580** in **NCBIInr**, RecName: Full=Phosphoribulokinase, chloroplastic; Short=PRK; Short=PRKase; AltName: Full=Phosphopentokinase; Flags: Precursor

Match to Query 10: 1487.624324 from(1488.631600,1+) intensity(0.0000) index(9)

Title: Label: I4, Spot\_Id: 219730, Peak\_List\_Id: 225349, MSMS Job\_Run\_Id: 21775, Comment:

Data file C:\Documents and Settings\Administrator\Desktop\farah BHU\spot set plate\Farah-Garima 11May 2013\ppw\_I4\_136842168700.txt

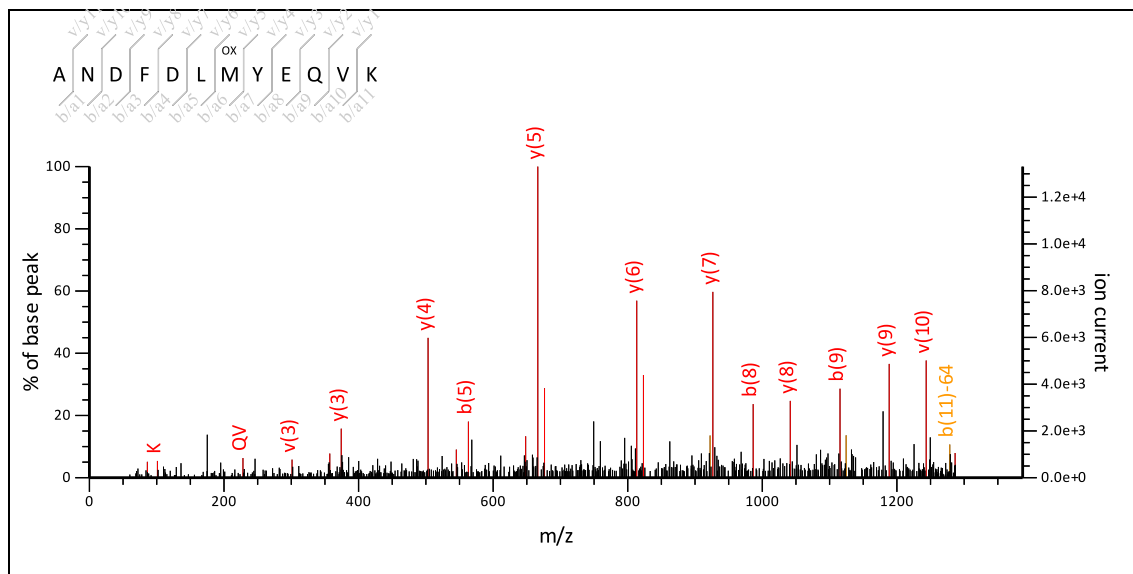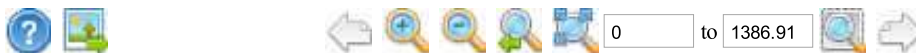

Label all possible matches  Label matches used for scoring

**Monoisotopic mass of neutral peptide Mr(calc):** 1487.6602

**Fixed modifications:** Carbamidomethyl (C) (apply to specified residues or termini only)

**Variable modifications:**

**M7** : Oxidation (M), with neutral losses 0.0000 (shown in table), 63.9983

**Ions Score:** 70 **Expect:** 0.00013

**Matches** : 29/280 fragment ions using 26 most intense peaks ([help](#))

| #  | Immon.          | a               | a*        | a <sup>0</sup> | b                | b*        | b <sup>0</sup>  | d         | Seq. | v                | w         | y                | y*               | y <sup>0</sup>  | #  |
|----|-----------------|-----------------|-----------|----------------|------------------|-----------|-----------------|-----------|------|------------------|-----------|------------------|------------------|-----------------|----|
| 1  | 44.0495         | 44.0495         |           |                | 72.0444          |           |                 | 44.0495   | A    |                  |           |                  |                  |                 | 12 |
| 2  | 87.0553         | 158.0924        | 141.0659  |                | 186.0873         | 169.0608  |                 | 115.0866  | N    | 1358.5933        | 1357.5980 | 1417.6304        | 1400.6039        | 1399.6198       | 11 |
| 3  | 88.0393         | 273.1193        | 256.0928  | 255.1088       | <b>301.1143</b>  | 284.0877  | 283.1037        | 229.1295  | D    | <b>1243.5664</b> | 1242.5711 | 1303.5875        | <b>1286.5609</b> | 1285.5769       | 10 |
| 4  | 120.0808        | 420.1878        | 403.1612  | 402.1772       | 448.1827         | 431.1561  | 430.1721        |           | F    | 1096.4979        |           | <b>1188.5605</b> | 1171.5340        | 1170.5500       | 9  |
| 5  | 88.0393         | 535.2147        | 518.1882  | 517.2041       | <b>563.2096</b>  | 546.1831  | <b>545.1991</b> | 491.2249  | D    | 981.4710         | 980.4757  | <b>1041.4921</b> | 1024.4656        | 1023.4816       | 8  |
| 6  | <b>86.0964</b>  | <b>648.2988</b> | 631.2722  | 630.2882       | <b>676.2937</b>  | 659.2671  | 658.2831        | 606.2518  | L    | 868.3869         | 867.3917  | <b>926.4652</b>  | 909.4386         | 908.4546        | 7  |
| 7  | 120.0478        | 795.3342        | 778.3076  | 777.3236       | <b>823.3291</b>  | 806.3025  | 805.3185        | 719.3359  | M    | 721.3515         | 720.3563  | <b>813.3811</b>  | 796.3546         | 795.3706        | 6  |
| 8  | 136.0757        | 958.3975        | 941.3709  | 940.3869       | <b>986.3924</b>  | 969.3659  | 968.3818        |           | Y    | 558.2882         |           | <b>666.3457</b>  | 649.3192         | <b>648.3352</b> | 5  |
| 9  | 102.0550        | 1087.4401       | 1070.4135 | 1069.4295      | <b>1115.4350</b> | 1098.4085 | 1097.4244       | 1029.4346 | E    | 429.2456         | 428.2504  | <b>503.2824</b>  | 486.2558         | 485.2718        | 4  |
| 10 | <b>101.0709</b> | 1215.4987       | 1198.4721 | 1197.4881      | <b>1243.4936</b> | 1226.4670 | 1225.4830       | 1158.4772 | Q    | <b>301.1870</b>  | 300.1918  | <b>374.2398</b>  | <b>357.2132</b>  |                 | 3  |
| 11 | 72.0808         | 1314.5671       | 1297.5405 | 1296.5565      | 1342.5620        | 1325.5354 | 1324.5514       | 1300.5514 | V    | 202.1186         | 215.1390  | 246.1812         | 229.1547         |                 | 2  |
| 12 | <b>101.1073</b> |                 |           |                |                  |           |                 |           | K    | 74.0237          | 73.0284   | 147.1128         | 130.0863         |                 | 1  |

| Seq   | ya       | yb       | Seq   | ya       | yb       | Seq    | ya       | yb       |
|-------|----------|----------|-------|----------|----------|--------|----------|----------|
| ND    | 202.0822 | 230.0771 | NDF   | 349.1506 | 377.1456 | NDFD   | 464.1776 | 492.1725 |
| NDFDL | 577.2617 | 605.2566 | DF    | 235.1077 | 263.1026 | DFD    | 350.1347 | 378.1296 |
| DFDL  | 463.2187 | 491.2136 | DFDLM | 610.2541 | 638.2490 | FD     | 235.1077 | 263.1026 |
| FDL   | 348.1918 | 376.1867 | FDFLM | 495.2272 | 523.2221 | FDFLMY | 658.2905 | 686.2854 |

|              |          |          |              |          |                 |              |          |                 |
|--------------|----------|----------|--------------|----------|-----------------|--------------|----------|-----------------|
| <b>DL</b>    | 201.1234 | 229.1183 | <b>DLM</b>   | 348.1588 | 376.1537        | <b>DLMY</b>  | 511.2221 | 539.2170        |
| <b>DLMYE</b> | 640.2647 | 668.2596 | <b>LM</b>    | 233.1318 | 261.1267        | <b>LMY</b>   | 396.1952 | 424.1901        |
| <b>LMYE</b>  | 525.2377 | 553.2327 | <b>LMYEQ</b> | 653.2963 | 681.2912        | <b>MY</b>    | 283.1111 | 311.1060        |
| <b>MYE</b>   | 412.1537 | 440.1486 | <b>MYEQ</b>  | 540.2123 | 568.2072        | <b>MYEQV</b> | 639.2807 | 667.2756        |
| <b>YE</b>    | 265.1183 | 293.1132 | <b>YEQ</b>   | 393.1769 | 421.1718        | <b>YEQV</b>  | 492.2453 | 520.2402        |
| <b>EQ</b>    | 230.1135 | 258.1084 | <b>EQV</b>   | 329.1819 | <b>357.1769</b> | <b>QV</b>    | 200.1394 | <b>228.1343</b> |

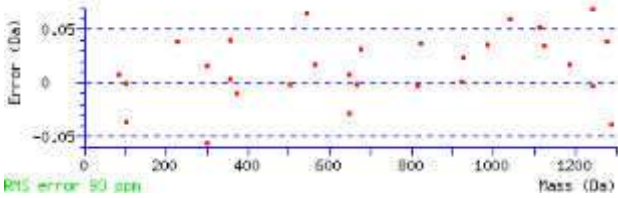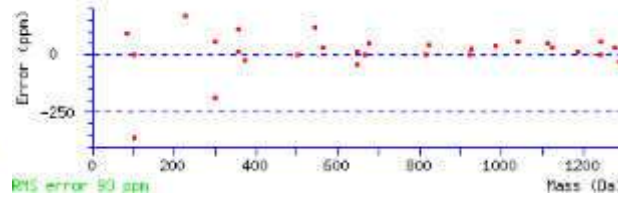

NCBI BLAST search of [ANDFDLMYEQVK](#)

(Parameters: blastp, nr protein database, expect=20000, no filter, PAM30)

Other BLAST [web gateways](#)

All matches to this query

| Score | Mr(calc)  | Delta   | Sequence                          |
|-------|-----------|---------|-----------------------------------|
| 70.1  | 1487.6602 | -0.0359 | <a href="#">ANDFDLMYEQVK</a>      |
| 22.8  | 1487.7402 | -0.1159 | <a href="#">DSMVNVPKNLEAR</a>     |
| 21.8  | 1487.6602 | -0.0359 | <a href="#">AODFELMYEQAK</a>      |
| 19.9  | 1487.6966 | -0.0723 | <a href="#">LLEMYFDLGDTR</a>      |
| 19.2  | 1487.7270 | -0.1026 | <a href="#">SDRFGLEAAHPDR</a>     |
| 18.2  | 1487.7514 | -0.1271 | <a href="#">NOMEGRIPTSLSR</a>     |
| 17.9  | 1487.7270 | -0.1026 | <a href="#">LDHHYHSQPQVK</a>      |
| 17.9  | 1487.6899 | -0.0656 | <a href="#">AREGGAMGAGAGDAAAR</a> |
| 17.1  | 1487.7402 | -0.1159 | <a href="#">AGEAOVLVASDAMAR</a>   |
| 16.9  | 1487.7402 | -0.1159 | <a href="#">AKDTMIPLNDAQR</a>     |

Mascot: <http://www.matrixscience.com/>

**MATRIX SCIENCE Mascot Search Results**

**Peptide View Spot no 56**

**MS/MS Fragmentation of GHSLESIKASIEAR**

Found in **gi|125580** in **NCBI nr**, RecName: Full=Phosphoribulokinase, chloroplastic; Short=PRK; Short=PRKase; AltName: Full=Phosphopentokinase; Flags: Precursor

Match to Query 11: 1496.772024 from(1497.779300,1+) intensity(0.0000) index(10)

Title: Label: I4, Spot\_Id: 219730, Peak\_List\_Id: 225352, MSMS Job\_Run\_Id: 21775, Comment:

Data file C:\Documents and Settings\Administrator\Desktop\farah BHU\spot set plate\Farah-Garima 11May 2013\ppw\_I4\_136842168700.txt

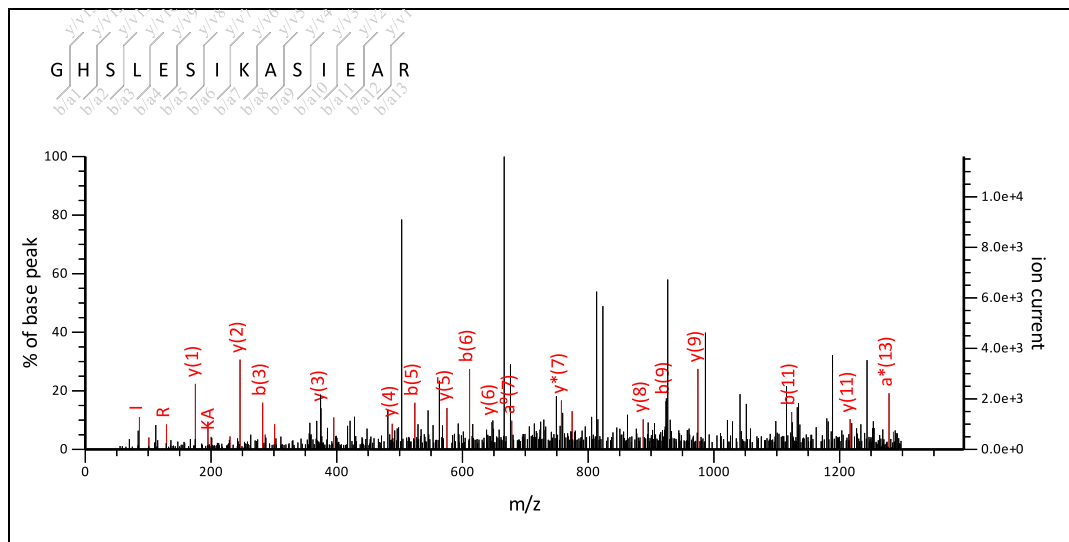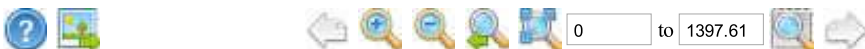

Label all possible matches  Label matches used for scoring

Monoisotopic mass of neutral peptide Mr(calc): 1496.7947

Fixed modifications: Carbamidomethyl (C) (apply to specified residues or termini only)

Ions Score: 45 Expect: 0.083

Matches : 31/239 fragment ions using 65 most intense peaks [\(help\)](#)

| #  | Immon.   | a         | a*        | a <sup>0</sup> | b         | b*        | b <sup>0</sup> | d         | d'        | Seq. | v         | w         | w'       | y         | y*        |
|----|----------|-----------|-----------|----------------|-----------|-----------|----------------|-----------|-----------|------|-----------|-----------|----------|-----------|-----------|
| 1  | 30.0338  | 30.0338   |           |                | 58.0287   |           |                | 44.0495   |           | G    |           |           |          |           |           |
| 2  | 110.0713 | 167.0927  |           |                | 195.0877  |           |                |           |           | H    | 1358.7274 |           |          | 1440.7805 | 1423.7540 |
| 3  | 60.0444  | 254.1248  |           | 236.1142       | 282.1197  |           | 264.1091       | 238.1299  |           | S    | 1271.6954 | 1270.7001 |          | 1303.7216 | 1286.6951 |
| 4  | 86.0964  | 367.2088  |           | 349.1983       | 395.2037  |           | 377.1932       | 325.1619  |           | L    | 1158.6113 | 1157.6161 |          | 1216.6896 | 1199.6630 |
| 5  | 102.0550 | 496.2514  |           | 478.2409       | 524.2463  |           | 506.2358       | 438.2459  |           | E    | 1029.5687 | 1028.5735 |          | 1103.6055 | 1086.5790 |
| 6  | 60.0444  | 583.2835  |           | 565.2729       | 611.2784  |           | 593.2678       | 567.2885  |           | S    | 942.5367  | 941.5415  |          | 974.5629  | 957.5364  |
| 7  | 86.0964  | 696.3675  |           | 678.3569       | 724.3624  |           | 706.3519       | 668.3362  | 682.3519  | I    | 829.4526  | 842.4730  | 856.4887 | 887.5309  | 870.5043  |
| 8  | 101.1073 | 824.4625  | 807.4359  | 806.4519       | 852.4574  | 835.4308  | 834.4468       | 767.4046  |           | K    | 701.3577  | 700.3624  |          | 774.4468  | 757.4203  |
| 9  | 44.0495  | 895.4996  | 878.4730  | 877.4890       | 923.4945  | 906.4680  | 905.4839       |           |           | A    | 630.3206  |           |          | 646.3519  | 629.3253  |
| 10 | 60.0444  | 982.5316  | 965.5051  | 964.5211       | 1010.5265 | 993.5000  | 992.5160       | 966.5367  |           | S    | 543.2885  | 542.2933  |          | 575.3148  | 558.2882  |
| 11 | 86.0964  | 1095.6157 | 1078.5891 | 1077.6051      | 1123.6106 | 1106.5840 | 1105.6000      | 1067.5844 | 1081.6000 | I    | 430.2045  | 443.2249  | 457.2405 | 488.2827  | 471.2562  |
| 12 | 102.0550 | 1224.6583 | 1207.6317 | 1206.6477      | 1252.6532 | 1235.6266 | 1234.6426      | 1166.6528 |           | E    | 301.1619  | 300.1666  |          | 375.1987  | 358.1721  |
| 13 | 44.0495  | 1295.6954 | 1278.6688 | 1277.6848      | 1323.6903 | 1306.6638 | 1305.6797      |           |           | A    | 230.1248  |           |          | 246.1561  | 229.1295  |
| 14 | 129.1135 |           |           |                |           |           |                |           |           | R    | 74.0237   | 73.0284   |          | 175.1190  | 158.0924  |

| Seq    | ya       | yb       | Seq    | ya       | yb       | Seq    | ya       | yb       |
|--------|----------|----------|--------|----------|----------|--------|----------|----------|
| HS     | 197.1033 | 225.0982 | HSL    | 310.1874 | 338.1823 | HSLE   | 439.2300 | 467.2249 |
| HSLES  | 526.2620 | 554.2569 | HSLESI | 639.3460 | 667.3410 | SL     | 173.1285 | 201.1234 |
| SLE    | 302.1710 | 330.1660 | SLES   | 389.2031 | 417.1980 | SLESI  | 502.2871 | 530.2821 |
| SLESIK | 630.3821 | 658.3770 | LE     | 215.1390 | 243.1339 | LES    | 302.1710 | 330.1660 |
| LESI   | 415.2551 | 443.2500 | LESIK  | 543.3501 | 571.3450 | LESIKA | 614.3872 | 642.3821 |
| ES     | 189.0870 | 217.0819 | ESI    | 302.1710 | 330.1660 | ESIK   | 430.2660 | 458.2609 |
| ESIKA  | 501.3031 | 529.2980 | ESIKAS | 588.3352 | 616.3301 | SI     | 173.1285 | 201.1234 |

|                |          |          |              |          |          |               |          |          |
|----------------|----------|----------|--------------|----------|----------|---------------|----------|----------|
| <b>SIK</b>     | 301.2234 | 329.2183 | <b>SIKA</b>  | 372.2605 | 400.2554 | <b>SIKAS</b>  | 459.2926 | 487.2875 |
| <b>SIKASI</b>  | 572.3766 | 600.3715 | <b>IK</b>    | 214.1914 | 242.1863 | <b>IKA</b>    | 285.2285 | 313.2234 |
| <b>IKAS</b>    | 372.2605 | 400.2554 | <b>IKASI</b> | 485.3446 | 513.3395 | <b>IKASIE</b> | 614.3872 | 642.3821 |
| <b>IKASIEA</b> | 685.4243 | 713.4192 | <b>KA</b>    | 172.1444 | 200.1394 | <b>KAS</b>    | 259.1765 | 287.1714 |
| <b>KASI</b>    | 372.2605 | 400.2554 | <b>KASIE</b> | 501.3031 | 529.2980 | <b>KASIEA</b> | 572.3402 | 600.3352 |
| <b>AS</b>      | 131.0815 | 159.0764 | <b>ASI</b>   | 244.1656 | 272.1605 | <b>ASIE</b>   | 373.2082 | 401.2031 |
| <b>ASIEA</b>   | 444.2453 | 472.2402 | <b>SI</b>    | 173.1285 | 201.1234 | <b>SIE</b>    | 302.1710 | 330.1660 |
| <b>SIEA</b>    | 373.2082 | 401.2031 | <b>IE</b>    | 215.1390 | 243.1339 | <b>IEA</b>    | 286.1761 | 314.1710 |
| <b>EA</b>      | 173.0921 | 201.0870 |              |          |          |               |          |          |

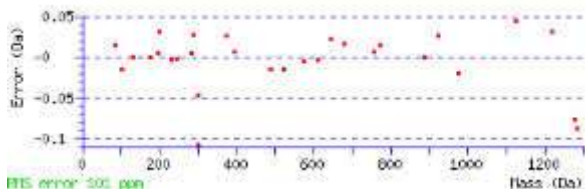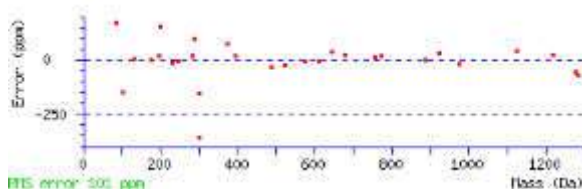

NCBI BLAST search of [GHSLESIKASIEAR](#)

(Parameters: blastp, nr protein database, expect=20000, no filter, PAM30)

Other BLAST [web gateways](#)

#### All matches to this query

| Score | Mr(calc)  | Delta   | Sequence                        |
|-------|-----------|---------|---------------------------------|
| 44.6  | 1496.7947 | -0.0226 | <a href="#">GHSLESIKASIEAR</a>  |
| 34.3  | 1496.8198 | -0.0478 | <a href="#">GHSLESIKASIEVK</a>  |
| 22.2  | 1496.7583 | 0.0137  | <a href="#">SPNTDGIHITSSIR</a>  |
| 17.3  | 1496.6718 | 0.1002  | <a href="#">SDAFVMTHGGNFAK</a>  |
| 15.5  | 1496.8351 | -0.0631 | <a href="#">DPWVLKLAEVTAR</a>   |
| 13.4  | 1496.7583 | 0.0137  | <a href="#">DPVVLASGOOQEAR</a>  |
| 12.8  | 1496.7471 | 0.0249  | <a href="#">VLPQDDPSATVAER</a>  |
| 12.7  | 1496.8497 | -0.0777 | <a href="#">ICGALGPVVSRLROK</a> |
| 12.6  | 1496.7471 | 0.0250  | <a href="#">KADADSSFITSSLR</a>  |
| 11.9  | 1496.8861 | -0.1140 | <a href="#">ICLIARNLLNGLK</a>   |

Mascot: <http://www.matrixscience.com/>

**MATRIX SCIENCE Mascot Search Results**

**Peptide View Spot no 56**

**MS/MS Fragmentation of IRDLYEQIIAER**

Found in **gi|125580** in **NCBIInr**, RecName: Full=Phosphoribulokinase, chloroplastic; Short=PRK; Short=PRKase; AltName: Full=Phosphopentokinase; Flags: Precursor

Match to Query 12: 1517.790924 from(1518.798200,1+) intensity(0.0000) index(11)

Title: Label: I4, Spot\_Id: 219730, Peak\_List\_Id: 225347, MSMS Job\_Run\_Id: 21775, Comment:

Data file C:\Documents and Settings\Administrator\Desktop\farah BHU\spot set plate\Farah-Garima 11May 2013\ppw\_I4\_136842168700.txt

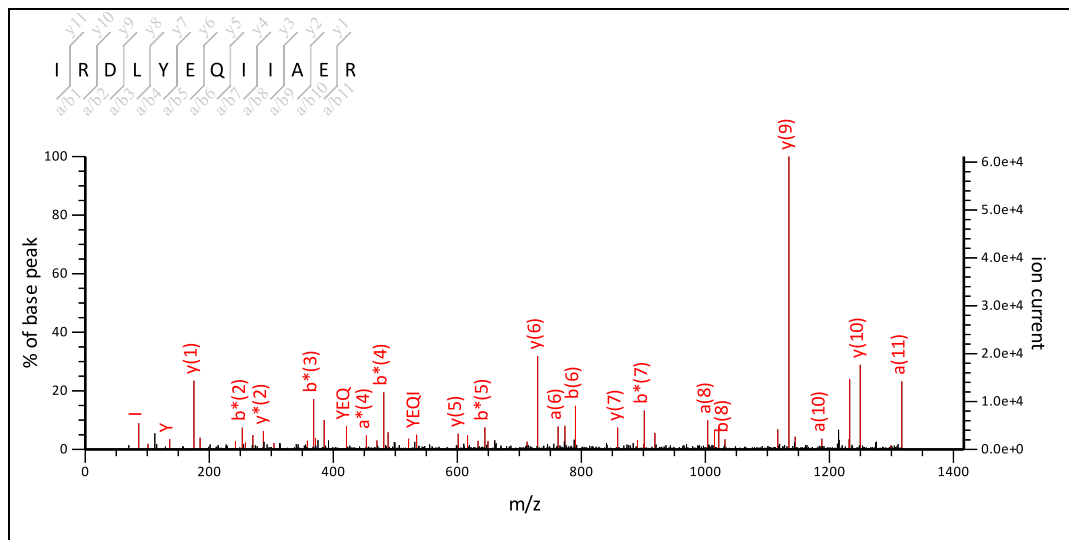

Navigation icons: Home, Back, Forward, Search, Print, etc. Range: 0 to 1416.73

Label all possible matches  Label matches used for scoring

Monoisotopic mass of neutral peptide Mr(calc): 1517.8201

Fixed modifications: Carbamidomethyl (C) (apply to specified residues or termini only)

Ions Score: 78 Expect: 3.9e-05

Matches : 62/200 fragment ions using 65 most intense peaks (help)

| #  | Immon.   | a         | a*        | a <sup>0</sup> | b         | b*        | b <sup>0</sup> | d         | d'        | Seq. | v         | w         | w'       | y         | y*        |
|----|----------|-----------|-----------|----------------|-----------|-----------|----------------|-----------|-----------|------|-----------|-----------|----------|-----------|-----------|
| 1  | 86.0964  | 86.0964   |           |                | 114.0913  |           |                | 44.0495   |           | I    |           |           |          |           |           |
| 2  | 129.1135 | 242.1975  | 225.1710  |                | 270.1925  | 253.1659  |                | 157.1335  |           | R    | 1304.6481 | 1303.6529 |          | 1405.7434 | 1388.7169 |
| 3  | 88.0393  | 357.2245  | 340.1979  | 339.2139       | 385.2194  | 368.1928  | 367.2088       | 313.2347  |           | D    | 1189.6212 | 1188.6259 |          | 1249.6423 | 1232.6157 |
| 4  | 86.0964  | 470.3085  | 453.2820  | 452.2980       | 498.3035  | 481.2769  | 480.2929       | 428.2616  |           | L    | 1076.5371 | 1075.5419 |          | 1134.6154 | 1117.5888 |
| 5  | 136.0757 | 633.3719  | 616.3453  | 615.3613       | 661.3668  | 644.3402  | 643.3562       |           |           | Y    | 913.4738  |           |          | 1021.5313 | 1004.5047 |
| 6  | 102.0550 | 762.4145  | 745.3879  | 744.4039       | 790.4094  | 773.3828  | 772.3988       | 704.4090  |           | E    | 784.4312  | 783.4359  |          | 858.4680  | 841.4414  |
| 7  | 101.0709 | 890.4730  | 873.4465  | 872.4625       | 918.4680  | 901.4414  | 900.4574       | 833.4516  |           | Q    | 656.3726  | 655.3774  |          | 729.4254  | 712.3988  |
| 8  | 86.0964  | 1003.5571 | 986.5306  | 985.5465       | 1031.5520 | 1014.5255 | 1013.5415      | 975.5258  | 989.5415  | I    | 543.2885  | 556.3089  | 570.3246 | 601.3668  | 584.3402  |
| 9  | 86.0964  | 1116.6412 | 1099.6146 | 1098.6306      | 1144.6361 | 1127.6095 | 1126.6255      | 1088.6099 | 1102.6255 | I    | 430.2045  | 443.2249  | 457.2405 | 488.2827  | 471.2562  |
| 10 | 44.0495  | 1187.6783 | 1170.6517 | 1169.6677      | 1215.6732 | 1198.6467 | 1197.6626      |           |           | A    | 359.1674  |           |          | 375.1987  | 358.1721  |
| 11 | 102.0550 | 1316.7209 | 1299.6943 | 1298.7103      | 1344.7158 | 1327.6892 | 1326.7052      | 1258.7154 |           | E    | 230.1248  | 229.1295  |          | 304.1615  | 287.1350  |
| 12 | 129.1135 |           |           |                |           |           |                |           |           | R    | 74.0237   | 73.0284   |          | 175.1190  | 158.0924  |

| Seq    | ya       | yb       | Seq    | ya       | yb       | Seq   | ya       | yb       |
|--------|----------|----------|--------|----------|----------|-------|----------|----------|
| RD     | 244.1404 | 272.1353 | RDL    | 357.2245 | 385.2194 | RDLY  | 520.2878 | 548.2827 |
| RDLYE  | 649.3304 | 677.3253 | DL     | 201.1234 | 229.1183 | DLY   | 364.1867 | 392.1816 |
| DLYE   | 493.2293 | 521.2242 | DLYEQ  | 621.2879 | 649.2828 | LY    | 249.1598 | 277.1547 |
| LYE    | 378.2023 | 406.1973 | LYEQ   | 506.2609 | 534.2558 | LYEQI | 619.3450 | 647.3399 |
| YE     | 265.1183 | 293.1132 | YEQ    | 393.1769 | 421.1718 | YEQI  | 506.2609 | 534.2558 |
| YEQII  | 619.3450 | 647.3399 | YEQIIA | 690.3821 | 718.3770 | EQ    | 230.1135 | 258.1084 |
| EQI    | 343.1976 | 371.1925 | EQII   | 456.2817 | 484.2766 | EQIIA | 527.3188 | 555.3137 |
| EQIIAE | 656.3614 | 684.3563 | QI     | 214.1550 | 242.1499 | QII   | 327.2391 | 355.2340 |
| QIIA   | 398.2762 | 426.2711 | QIIAE  | 527.3188 | 555.3137 | II    | 199.1805 | 227.1754 |

|            |          |          |             |          |          |           |          |          |
|------------|----------|----------|-------------|----------|----------|-----------|----------|----------|
| <b>IIA</b> | 270.2176 | 298.2125 | <b>IIAE</b> | 399.2602 | 427.2551 | <b>IA</b> | 157.1335 | 185.1285 |
| <b>IAE</b> | 286.1761 | 314.1710 | <b>AE</b>   | 173.0921 | 201.0870 |           |          |          |

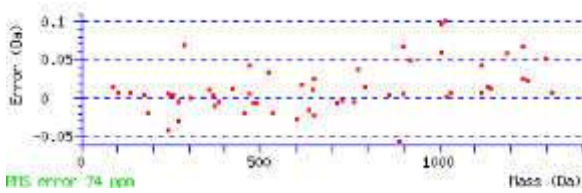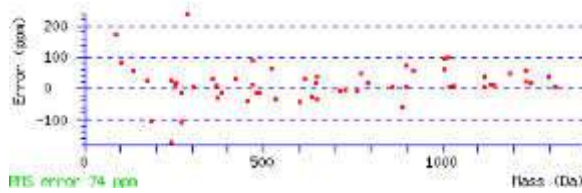

NCBI BLAST search of [IRDLYEQIIAER](#)

(Parameters: blastp, nr protein database, expect=20000, no filter, PAM30)

Other BLAST [web gateways](#)

#### All matches to this query

| Score | Mr(calc)  | Delta   | Sequence                        |
|-------|-----------|---------|---------------------------------|
| 77.8  | 1517.8201 | -0.0292 | <a href="#">IRDLYEQIIAER</a>    |
| 30.6  | 1517.7395 | 0.0514  | <a href="#">AMAEFEEKLLEAR</a>   |
| 27.4  | 1517.7950 | -0.0041 | <a href="#">QYNQOQQLISR</a>     |
| 26.8  | 1517.8024 | -0.0115 | <a href="#">IPSSFKHMISLR</a>    |
| 26.7  | 1517.7474 | 0.0435  | <a href="#">EWSLGALDGSQISR</a>  |
| 24.9  | 1517.8929 | -0.1020 | <a href="#">ILSAVYSREVIIR</a>   |
| 24.4  | 1517.8202 | -0.0292 | <a href="#">EVLRONQYDLLK</a>    |
| 23.6  | 1517.8049 | -0.0140 | <a href="#">DYSKSETLGNLSLR</a>  |
| 23.5  | 1517.8202 | -0.0293 | <a href="#">LYVDADLRIDGIR</a>   |
| 23.4  | 1517.6780 | 0.1129  | <a href="#">MAISGPSLDGNEDGR</a> |

Mascot: <http://www.matrixscience.com/>




**Mascot Search Results**
**Peptide View Spot no 56**
**MS/MS Fragmentation of IFVIEGLHPMYDER**

Found in [gij125580](#) in [NCBIInr](#), RecName: Full=Phosphoribulokinase, chloroplastic; Short=PRK; Short=PRKase; AltName: Full=Phosphopentokinase; Flags: Precursor

Match to Query 14: 1717.816624 from(1718.823900,1+) intensity(0.0000) index(13)

Title: Label: I4, Spot\_Id: 219730, Peak\_List\_Id: 225350, MSMS Job\_Run\_Id: 21775, Comment:

Data file C:\Documents and Settings\Administrator\Desktop\farah BHU\spot set plate\Farah-Garima 11May 2013\ppw\_I4\_136842168700.txt

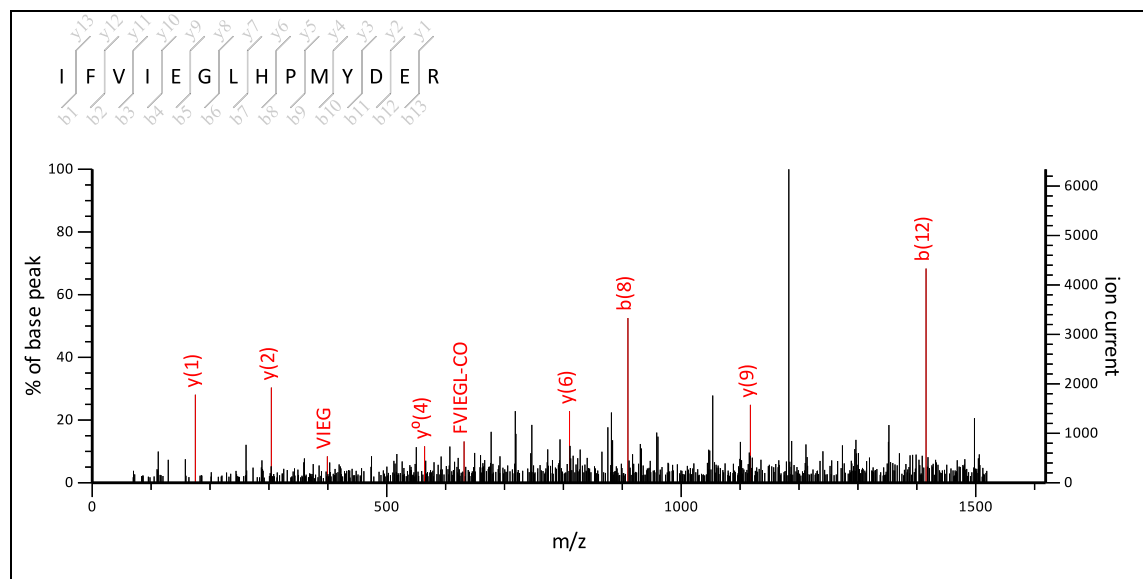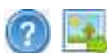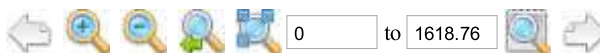

Label all possible matches  Label matches used for scoring

Monoisotopic mass of neutral peptide Mr(calc): 1717.8498

Fixed modifications: Carbamidomethyl (C) (apply to specified residues or termini only)

Ions Score: 15 Expect: 55

Matches : 10/214 fragment ions using 15 most intense peaks ([help](#))

| #  | Immon.   | a               | a <sup>0</sup> | b                | b <sup>0</sup> | d         | d'       | Seq. | v         | w         | w'        | y                | y*        | y <sup>0</sup>  | #  |
|----|----------|-----------------|----------------|------------------|----------------|-----------|----------|------|-----------|-----------|-----------|------------------|-----------|-----------------|----|
| 1  | 86.0964  | 86.0964         |                | 114.0913         |                | 44.0495   |          | I    |           |           |           |                  |           |                 | 14 |
| 2  | 120.0808 | 233.1648        |                | 261.1598         |                |           |          | F    | 1513.7104 |           |           | 1605.7730        | 1588.7464 | 1587.7624       | 13 |
| 3  | 72.0808  | 332.2333        |                | 360.2282         |                | 318.2176  |          | V    | 1414.6420 | 1427.6624 |           | 1458.7046        | 1441.6780 | 1440.6940       | 12 |
| 4  | 86.0964  | 445.3173        |                | 473.3122         |                | 417.2860  | 431.3017 | I    | 1301.5579 | 1314.5783 | 1328.5940 | 1359.6362        | 1342.6096 | 1341.6256       | 11 |
| 5  | 102.0550 | 574.3599        | 556.3493       | 602.3548         | 584.3443       | 516.3544  |          | E    | 1172.5153 | 1171.5201 |           | 1246.5521        | 1229.5256 | 1228.5415       | 10 |
| 6  | 30.0338  | <b>631.3814</b> | 613.3708       | 659.3763         | 641.3657       |           |          | G    |           |           |           | <b>1117.5095</b> | 1100.4830 | 1099.4989       | 9  |
| 7  | 86.0964  | 744.4654        | 726.4549       | 772.4604         | 754.4498       | 702.4185  |          | L    | 1002.4098 | 1001.4145 |           | 1060.4880        | 1043.4615 | 1042.4775       | 8  |
| 8  | 110.0713 | 881.5244        | 863.5138       | <b>909.5193</b>  | 891.5087       |           |          | H    | 865.3509  |           |           | 947.4040         | 930.3774  | 929.3934        | 7  |
| 9  | 70.0651  | 978.5771        | 960.5665       | 1006.5720        | 988.5615       | 952.5615  |          | P    | 768.2981  | 767.3029  |           | <b>810.3451</b>  | 793.3185  | 792.3345        | 6  |
| 10 | 104.0528 | 1109.6176       | 1091.6070      | 1137.6125        | 1119.6019      | 1049.6142 |          | M    | 637.2576  | 636.2624  |           | 713.2923         | 696.2658  | 695.2817        | 5  |
| 11 | 136.0757 | 1272.6809       | 1254.6704      | 1300.6758        | 1282.6653      |           |          | Y    | 474.1943  |           |           | 582.2518         | 565.2253  | <b>564.2413</b> | 4  |
| 12 | 88.0393  | 1387.7079       | 1369.6973      | <b>1415.7028</b> | 1397.6922      | 1343.7180 |          | D    | 359.1674  | 358.1721  |           | 419.1885         | 402.1619  | 401.1779        | 3  |
| 13 | 102.0550 | 1516.7505       | 1498.7399      | 1544.7454        | 1526.7348      | 1458.7450 |          | E    | 230.1248  | 229.1295  |           | <b>304.1615</b>  | 287.1350  | 286.1510        | 2  |
| 14 | 129.1135 |                 |                |                  |                |           |          | R    | 74.0237   | 73.0284   |           | <b>175.1190</b>  | 158.0924  |                 | 1  |

| Seq   | ya       | yb       | Seq    | ya              | yb       | Seq  | ya       | yb       |
|-------|----------|----------|--------|-----------------|----------|------|----------|----------|
| FV    | 219.1492 | 247.1441 | FVI    | 332.2333        | 360.2282 | FVIE | 461.2758 | 489.2708 |
| FVIEG | 518.2973 | 546.2922 | FVIEGL | <b>631.3814</b> | 659.3763 | VI   | 185.1648 | 213.1598 |

|               |          |          |               |          |                 |               |          |          |
|---------------|----------|----------|---------------|----------|-----------------|---------------|----------|----------|
| <b>VIE</b>    | 314.2074 | 342.2023 | <b>VIEG</b>   | 371.2289 | <b>399.2238</b> | <b>VIEGL</b>  | 484.3130 | 512.3079 |
| <b>VIEGLH</b> | 621.3719 | 649.3668 | <b>IE</b>     | 215.1390 | 243.1339        | <b>IEG</b>    | 272.1605 | 300.1554 |
| <b>IEGL</b>   | 385.2445 | 413.2395 | <b>IEGLH</b>  | 522.3035 | 550.2984        | <b>IEGLHP</b> | 619.3562 | 647.3511 |
| <b>EG</b>     | 159.0764 | 187.0713 | <b>EGL</b>    | 272.1605 | 300.1554        | <b>EGLH</b>   | 409.2194 | 437.2143 |
| <b>EGLHP</b>  | 506.2722 | 534.2671 | <b>EGLHPM</b> | 637.3126 | 665.3076        | <b>GL</b>     | 143.1179 | 171.1128 |
| <b>GLH</b>    | 280.1768 | 308.1717 | <b>GLHP</b>   | 377.2296 | 405.2245        | <b>GLHPM</b>  | 508.2701 | 536.2650 |
| <b>GLHPMY</b> | 671.3334 | 699.3283 | <b>LH</b>     | 223.1553 | 251.1503        | <b>LHP</b>    | 320.2081 | 348.2030 |
| <b>LHPM</b>   | 451.2486 | 479.2435 | <b>LHPMY</b>  | 614.3119 | 642.3068        | <b>HP</b>     | 207.1240 | 235.1190 |
| <b>HPM</b>    | 338.1645 | 366.1594 | <b>HPMY</b>   | 501.2279 | 529.2228        | <b>HPMYD</b>  | 616.2548 | 644.2497 |
| <b>PM</b>     | 201.1056 | 229.1005 | <b>PMY</b>    | 364.1689 | 392.1639        | <b>PMYD</b>   | 479.1959 | 507.1908 |
| <b>PMYDE</b>  | 608.2385 | 636.2334 | <b>MY</b>     | 267.1162 | 295.1111        | <b>MYD</b>    | 382.1431 | 410.1380 |
| <b>MYDE</b>   | 511.1857 | 539.1806 | <b>YD</b>     | 251.1026 | 279.0975        | <b>YDE</b>    | 380.1452 | 408.1401 |
| <b>DE</b>     | 217.0819 | 245.0768 |               |          |                 |               |          |          |

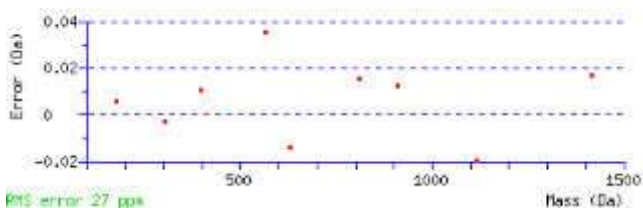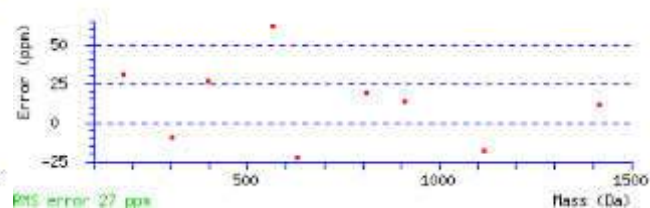

NCBI **BLAST** search of [IFVIEGLHPMYDER](#)

(Parameters: blastp, nr protein database, expect=20000, no filter, PAM30)

Other BLAST [web gateways](#)

#### All matches to this query

| Score | Mr(calc)  | Delta   | Sequence                          |
|-------|-----------|---------|-----------------------------------|
| 32.7  | 1717.8498 | -0.0332 | <a href="#">IFVIEGLHPMFDER</a>    |
| 19.5  | 1717.8419 | -0.0252 | <a href="#">MLEYEVKYVMIER</a>     |
| 14.9  | 1717.8498 | -0.0331 | <a href="#">IFVIEGLHPMYDER</a>    |
| 13.1  | 1717.8167 | -0.0001 | <a href="#">MLDYETRFVMIER</a>     |
| 12.8  | 1717.8457 | -0.0291 | <a href="#">MAETLIHYSVNPSTR</a>   |
| 12.5  | 1717.8536 | -0.0370 | <a href="#">WPEPRGDAAGAPPLER</a>  |
| 11.9  | 1717.8206 | -0.0040 | <a href="#">IASCLNSSHFQVAER</a>   |
| 10.9  | 1717.8648 | -0.0482 | <a href="#">GKYLHAAPGASAGPHER</a> |
| 9.7   | 1717.7036 | 0.1130  | <a href="#">MSGGNSNCTVYIDER</a>   |
| 9.4   | 1717.8496 | -0.0330 | <a href="#">DHNLGSDVPLRNPER</a>   |

Mascot: <http://www.matrixscience.com/>



# Mascot Search Results

## Peptide View **Spot no 57**

MS/MS Fragmentation of **FAEYASSGR**

Found in **gi|115471157** in **NCBIInr**, Os07g0212200 [Oryza sativa Japonica Group]

Match to Query 58: 986.477164 from(987.484440,1+) intensity(0.0000) index(3)

Title: Label: N11, Spot\_Id: 219847, Peak\_List\_Id: 227553, MSMS Job\_Run\_Id: 21965, Comment:

Data file C:\Documents and Settings\Administrator\Desktop\Farah-Garima 11May 2013\ppw\_N11\_136868230800.txt

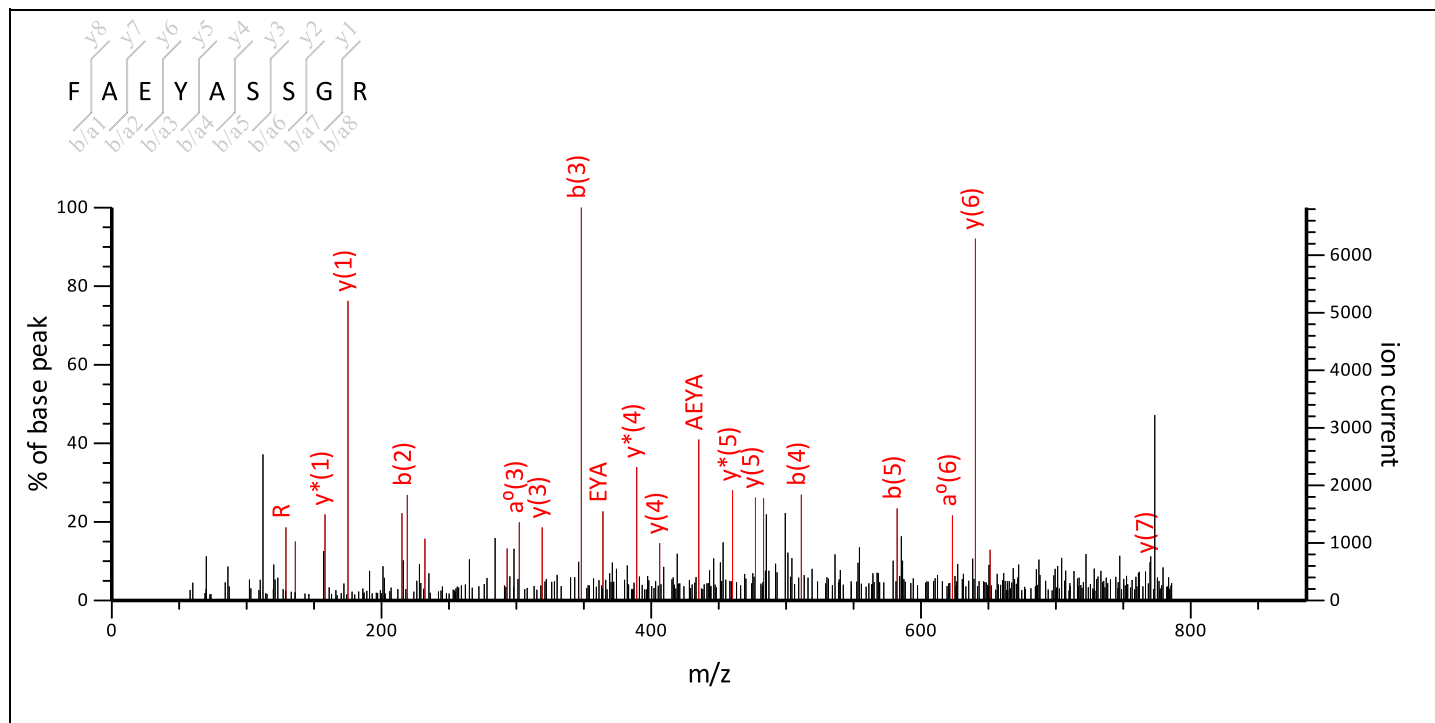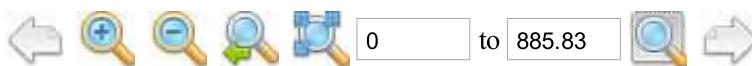

Label all possible matches  Label matches used for scoring

**Monoisotopic mass of neutral peptide Mr(calc):** 986.4457

**Fixed modifications:** Carbamidomethyl (C) (apply to specified residues or termini only)

**Ions Score:** 47 **Expect:** 0.86

**Matches :** 29/116 fragment ions using 40 most intense peaks ([help](#))

| # | Immon.          | a               | a <sup>0</sup>  | b               | b <sup>0</sup>  | d        | Seq. | v        | w        | y               | y*              | y <sup>0</sup> | # |
|---|-----------------|-----------------|-----------------|-----------------|-----------------|----------|------|----------|----------|-----------------|-----------------|----------------|---|
| 1 | 120.0808        | 120.0808        |                 | 148.0757        |                 | 44.0495  | F    |          |          |                 |                 |                | 9 |
| 2 | 44.0495         | 191.1179        |                 | <b>219.1128</b> |                 |          | A    | 824.3533 |          | 840.3846        | 823.3581        | 822.3741       | 8 |
| 3 | 102.0550        | 320.1605        | <b>302.1499</b> | <b>348.1554</b> | 330.1448        | 262.1550 | E    | 695.3107 | 694.3155 | <b>769.3475</b> | 752.3210        | 751.3369       | 7 |
| 4 | <b>136.0757</b> | <b>483.2238</b> | 465.2132        | <b>511.2187</b> | 493.2082        |          | Y    | 532.2474 |          | <b>640.3049</b> | <b>623.2784</b> | 622.2944       | 6 |
| 5 | 44.0495         | 554.2609        | 536.2504        | <b>582.2558</b> | 564.2453        |          | A    | 461.2103 |          | <b>477.2416</b> | <b>460.2150</b> | 459.2310       | 5 |
| 6 | 60.0444         | 641.2930        | <b>623.2824</b> | 669.2879        | <b>651.2773</b> | 625.2980 | S    | 374.1783 | 373.1830 | <b>406.2045</b> | <b>389.1779</b> | 388.1939       | 4 |
| 7 | 60.0444         | 728.3250        | 710.3144        | 756.3199        | 738.3093        | 712.3301 | S    | 287.1462 | 286.1510 | <b>319.1724</b> | <b>302.1459</b> | 301.1619       | 3 |
| 8 | 30.0338         | 785.3464        | 767.3359        | 813.3414        | 795.3308        |          | G    |          |          | <b>232.1404</b> | <b>215.1139</b> |                | 2 |

|   |          |  |  |  |  |   |         |         |          |          |   |
|---|----------|--|--|--|--|---|---------|---------|----------|----------|---|
| 9 | 129.1135 |  |  |  |  | R | 74.0237 | 73.0284 | 175.1190 | 158.0924 | 1 |
|---|----------|--|--|--|--|---|---------|---------|----------|----------|---|

| Seq   | ya       | yb       | Seq    | ya       | yb       | Seq     | ya       | yb       |
|-------|----------|----------|--------|----------|----------|---------|----------|----------|
| AE    | 173.0921 | 201.0870 | AEY    | 336.1554 | 364.1503 | AEYA    | 407.1925 | 435.1874 |
| AEYAS | 494.2245 | 522.2195 | AEYASS | 581.2566 | 609.2515 | AEYASSG | 638.2780 | 666.2729 |
| EY    | 265.1183 | 293.1132 | EYA    | 336.1554 | 364.1503 | EYAS    | 423.1874 | 451.1823 |
| EYASS | 510.2195 | 538.2144 | EYASSG | 567.2409 | 595.2358 | YA      | 207.1128 | 235.1077 |
| YAS   | 294.1448 | 322.1397 | YASS   | 381.1769 | 409.1718 | YASSG   | 438.1983 | 466.1932 |
| AS    | 131.0815 | 159.0764 | ASS    | 218.1135 | 246.1084 | ASSG    | 275.1350 | 303.1299 |
| SS    | 147.0764 | 175.0713 | SSG    | 204.0979 | 232.0928 | SG      | 117.0659 | 145.0608 |

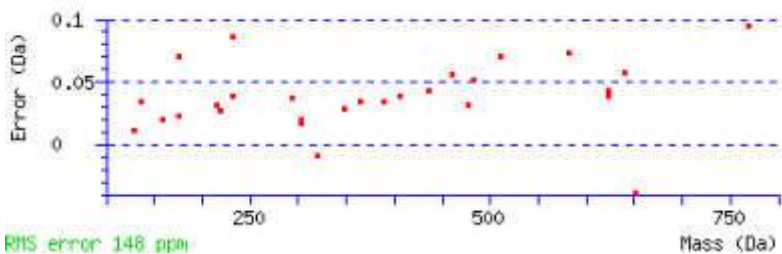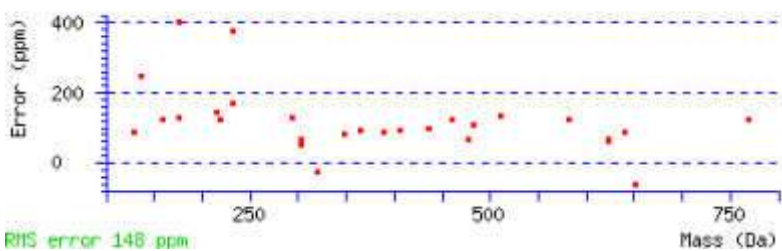

NCBI **BLAST** search of [FAEYASSGR](#)

(Parameters: blastp, nr protein database, expect=20000, no filter, PAM30)

Other BLAST [web gateways](#)

#### All matches to this query

| Score | Mr(calc) | Delta   | Sequence                    |
|-------|----------|---------|-----------------------------|
| 46.7  | 986.4457 | 0.0314  | <a href="#">FAEYASSGR</a>   |
| 33.6  | 986.4127 | 0.0644  | <a href="#">ESMYASSGR</a>   |
| 25.2  | 986.3950 | 0.0822  | <a href="#">MAEYMNGR</a>    |
| 25.1  | 986.3950 | 0.0822  | <a href="#">MSEYAACR</a>    |
| 24.1  | 986.4127 | 0.0644  | <a href="#">AEYMASSGR</a>   |
| 23.2  | 986.5073 | -0.0301 | <a href="#">SSTLAYFAK</a>   |
| 22.2  | 986.4716 | 0.0056  | <a href="#">RPPCASSGR</a>   |
| 21.6  | 986.3983 | 0.0788  | <a href="#">SMMMTSSGR</a>   |
| 21.2  | 986.4821 | -0.0050 | <a href="#">ALYFSSGR</a>    |
| 20.9  | 986.5509 | -0.0737 | <a href="#">ILGAGVTGSGR</a> |

Mascot: <http://www.matrixscience.com/>



# Mascot Search Results

## Peptide View **Spot no 57**

### MS/MS Fragmentation of **IFNCVSDR**

Found in **gi|115471157** in **NCBI**nr, Os07g0212200 [Oryza sativa Japonica Group]

Match to Query 73: 1009.493824 from(1010.501100,1+) intensity(0.0000) index(5)

Title: Label: N11, Spot\_Id: 219847, Peak\_List\_Id: 227550, MSMS Job\_Run\_Id: 21965, Comment:

Data file C:\Documents and Settings\Administrator\Desktop\Farah-Garima 11May 2013\ppw\_N11\_136868230800.txt

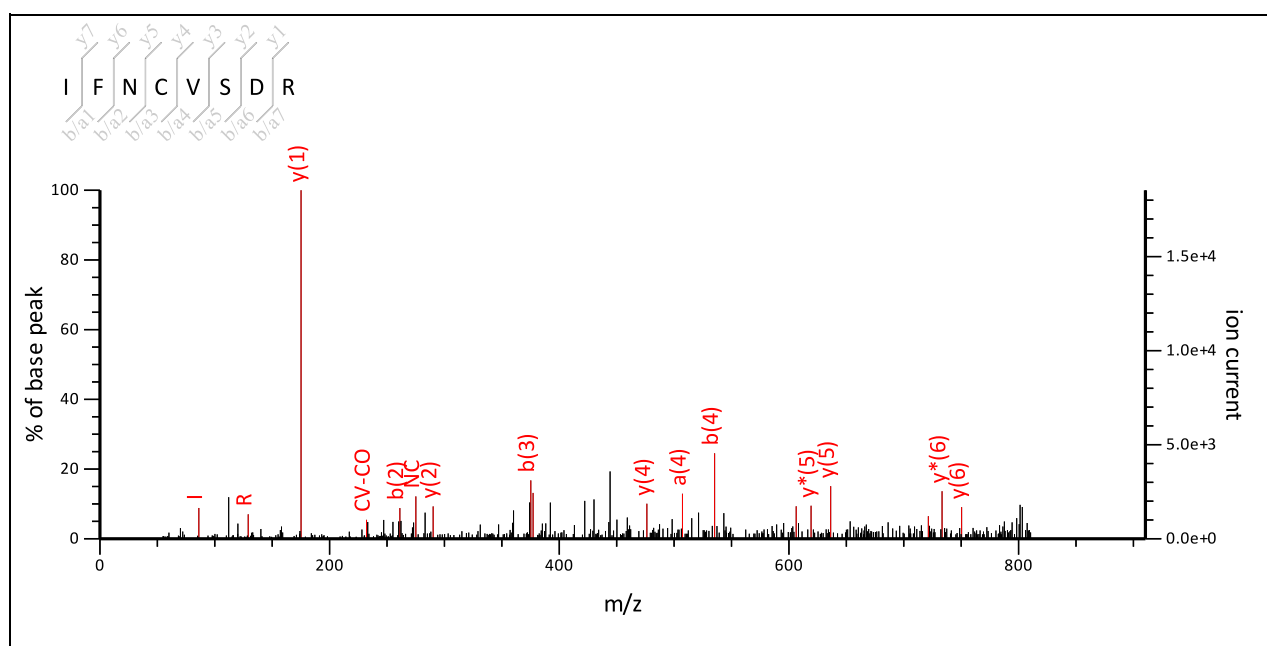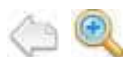

0 to 910.45

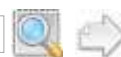

Label all possible matches  Label matches used for scoring

**Monoisotopic mass of neutral peptide Mr(calc):** 1009.4651

**Fixed modifications:** Carbamidomethyl (C) (apply to specified residues or termini only)

**Ions Score:** 48 **Expect:** 0.51

**Matches:** 21/104 fragment ions using 24 most intense peaks ([help](#))

| # | Immon.   | a        | a*       | a <sup>0</sup> | b        | b*       | b <sup>0</sup> | d        | Seq. | v        | w        | y        | y*       | y <sup>0</sup> | # |
|---|----------|----------|----------|----------------|----------|----------|----------------|----------|------|----------|----------|----------|----------|----------------|---|
| 1 | 86.0964  | 86.0964  |          |                | 114.0913 |          |                | 44.0495  | I    |          |          |          |          |                | 8 |
| 2 | 120.0808 | 233.1648 |          |                | 261.1598 |          |                |          | F    | 805.3257 |          | 897.3883 | 880.3618 | 879.3778       | 7 |
| 3 | 87.0553  | 347.2078 | 330.1812 |                | 375.2027 | 358.1761 |                | 304.2020 | N    | 691.2828 | 690.2876 | 750.3199 | 733.2934 | 732.3093       | 6 |
| 4 | 133.0430 | 507.2384 | 490.2119 |                | 535.2333 | 518.2068 |                | 418.2449 | C    | 531.2522 | 530.2569 | 636.2770 | 619.2504 | 618.2664       | 5 |
| 5 | 72.0808  | 606.3068 | 589.2803 |                | 634.3017 | 617.2752 |                | 592.2912 | V    | 432.1837 | 445.2041 | 476.2463 | 459.2198 | 458.2358       | 4 |
| 6 | 60.0444  | 693.3389 | 676.3123 | 675.3283       | 721.3338 | 704.3072 | 703.3232       | 677.3439 | S    | 345.1517 | 344.1565 | 377.1779 | 360.1514 | 359.1674       | 3 |
| 7 | 88.0393  | 808.3658 | 791.3393 | 790.3552       | 836.3607 | 819.3342 | 818.3501       | 764.3760 | D    | 230.1248 | 229.1295 | 290.1459 | 273.1193 | 272.1353       | 2 |
| 8 | 129.1135 |          |          |                |          |          |                |          | R    | 74.0237  | 73.0284  | 175.1190 | 158.0924 |                | 1 |

| Seq   | ya       | yb       | Seq    | ya       | yb       | Seq   | ya       | yb       |
|-------|----------|----------|--------|----------|----------|-------|----------|----------|
| FN    | 234.1237 | 262.1186 | FNC    | 394.1544 | 422.1493 | FNCV  | 493.2228 | 521.2177 |
| FNCVS | 580.2548 | 608.2497 | FNCVSD | 695.2817 | 723.2767 | NC    | 247.0859 | 275.0809 |
| NCV   | 346.1544 | 374.1493 | NCVS   | 433.1864 | 461.1813 | NCVSD | 548.2133 | 576.2082 |
| CV    | 232.1114 | 260.1063 | CVS    | 319.1435 | 347.1384 | CVSD  | 434.1704 | 462.1653 |

|           |          |          |            |          |          |           |                 |          |
|-----------|----------|----------|------------|----------|----------|-----------|-----------------|----------|
| <b>VS</b> | 159.1128 | 187.1077 | <b>VSD</b> | 274.1397 | 302.1347 | <b>SD</b> | <b>175.0713</b> | 203.0662 |
|-----------|----------|----------|------------|----------|----------|-----------|-----------------|----------|

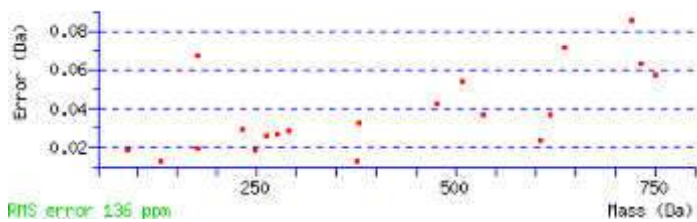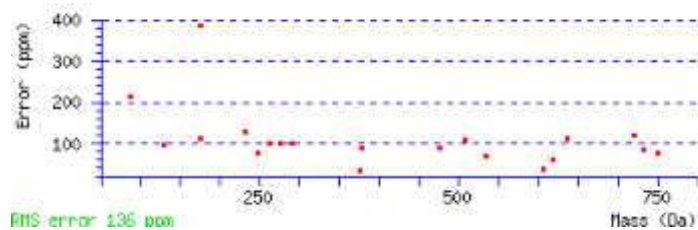

NCBI **BLAST** search of [IFNCVSDR](#)

(Parameters: blastp, nr protein database, expect=20000, no filter, PAM30)

Other BLAST [web gateways](#)

#### All matches to this query

| Score | Mr(calc)  | Delta   | Sequence                   |
|-------|-----------|---------|----------------------------|
| 48.0  | 1009.4651 | 0.0287  | <a href="#">IFNCVSDR</a>   |
| 34.7  | 1009.4829 | 0.0110  | <a href="#">LFGSSGAESR</a> |
| 33.1  | 1009.5015 | -0.0077 | <a href="#">IFGGTLCSR</a>  |
| 31.6  | 1009.4685 | 0.0253  | <a href="#">MLNCTLSR</a>   |
| 30.4  | 1009.5015 | -0.0077 | <a href="#">FLNCTLSR</a>   |
| 29.4  | 1009.5094 | -0.0155 | <a href="#">FIHHVSDR</a>   |
| 29.2  | 1009.4651 | 0.0287  | <a href="#">FLNTCAER</a>   |
| 29.1  | 1009.4498 | 0.0440  | <a href="#">MLGSGSSEAR</a> |
| 28.9  | 1009.3957 | 0.0981  | <a href="#">MVAGCADDR</a>  |
| 28.0  | 1009.5920 | -0.0982 | <a href="#">NIPPLTISR</a>  |

Mascot: <http://www.matrixscience.com/>



# Mascot Search Results

## Peptide View **Spot no 57**

MS/MS Fragmentation of **NMHFYAEP**R

Found in **gi|115471157** in **NCBInr**, Os07g0212200 [Oryza sativa Japonica Group]

Match to Query 143: 1163.567524 from(1164.574800,1+) intensity(0.0000) index(13)

Title: Label: N11, Spot\_Id: 219847, Peak\_List\_Id: 227555, MSMS Job\_Run\_Id: 21965, Comment:

Data file C:\Documents and Settings\Administrator\Desktop\Farah-Garima 11May 2013\ppw\_N11\_136868230800.txt

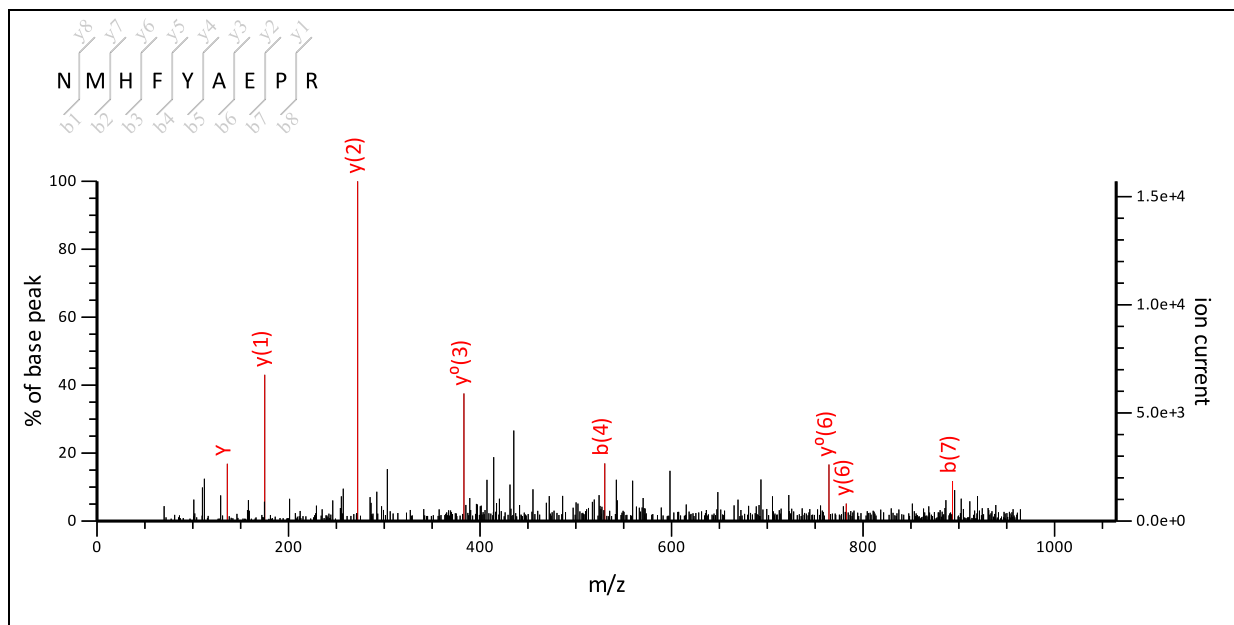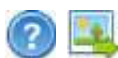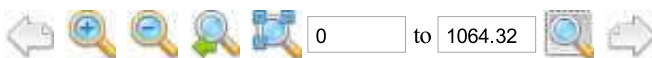

Label all possible matches  Label matches used for scoring

Monoisotopic mass of neutral peptide Mr(calc): 1163.5182

Fixed modifications: Carbamidomethyl (C) (apply to specified residues or termini only)

Ions Score: 34 Expect: 16

Matches : 10/119 fragment ions using 9 most intense peaks ([help](#))

| # | Immon.          | a        | a*       | a <sup>0</sup> | b               | b*       | b <sup>0</sup> | d        | Seq. | v        | w        | y               | y*        | y <sup>0</sup>  | # |
|---|-----------------|----------|----------|----------------|-----------------|----------|----------------|----------|------|----------|----------|-----------------|-----------|-----------------|---|
| 1 | 87.0553         | 87.0553  | 70.0287  |                | 115.0502        | 98.0237  |                | 44.0495  | N    |          |          |                 |           |                 | 9 |
| 2 | 104.0528        | 218.0958 | 201.0692 |                | 246.0907        | 229.0641 |                | 158.0924 | M    | 974.4479 | 973.4526 | 1050.4826       | 1033.4560 | 1032.4720       | 8 |
| 3 | 110.0713        | 355.1547 | 338.1281 |                | <b>383.1496</b> | 366.1231 |                |          | H    | 837.3890 |          | 919.4421        | 902.4155  | 901.4315        | 7 |
| 4 | 120.0808        | 502.2231 | 485.1966 |                | <b>530.2180</b> | 513.1915 |                |          | F    | 690.3206 |          | <b>782.3832</b> | 765.3566  | <b>764.3726</b> | 6 |
| 5 | <b>136.0757</b> | 665.2864 | 648.2599 |                | 693.2813        | 676.2548 |                |          | Y    | 527.2572 |          | 635.3148        | 618.2882  | 617.3042        | 5 |
| 6 | 44.0495         | 736.3235 | 719.2970 |                | <b>764.3185</b> | 747.2919 |                |          | A    | 456.2201 |          | 472.2514        | 455.2249  | 454.2409        | 4 |
| 7 | 102.0550        | 865.3661 | 848.3396 | 847.3556       | <b>893.3611</b> | 876.3345 | 875.3505       | 807.3607 | E    | 327.1775 | 326.1823 | 401.2143        | 384.1878  | <b>383.2037</b> | 3 |
| 8 | 70.0651         | 962.4189 | 945.3924 | 944.4083       | 990.4138        | 973.3873 | 972.4032       | 936.4032 | P    | 230.1248 | 229.1295 | <b>272.1717</b> | 255.1452  |                 | 2 |
| 9 | 129.1135        |          |          |                |                 |          |                |          | R    | 74.0237  | 73.0284  | <b>175.1190</b> | 158.0924  |                 | 1 |

| Seq   | ya       | yb       | Seq   | ya       | yb       | Seq   | ya       | yb       |
|-------|----------|----------|-------|----------|----------|-------|----------|----------|
| MH    | 241.1118 | 269.1067 | MHF   | 388.1802 | 416.1751 | MHFY  | 551.2435 | 579.2384 |
| MHFYA | 622.2806 | 650.2755 | HF    | 257.1397 | 285.1346 | HFY   | 420.2030 | 448.1979 |
| HFYA  | 491.2401 | 519.2350 | HFYAE | 620.2827 | 648.2776 | FY    | 283.1441 | 311.1390 |
| FYA   | 354.1812 | 382.1761 | FYAE  | 483.2238 | 511.2187 | FYAEP | 580.2766 | 608.2715 |



|                    |          |          |                     |          |          |                      |          |          |
|--------------------|----------|----------|---------------------|----------|----------|----------------------|----------|----------|
| <a href="#">YA</a> | 207.1128 | 235.1077 | <a href="#">YAE</a> | 336.1554 | 364.1503 | <a href="#">YAEP</a> | 433.2082 | 461.2031 |
| <a href="#">AE</a> | 173.0921 | 201.0870 | <a href="#">AEP</a> | 270.1448 | 298.1397 | <a href="#">EP</a>   | 199.1077 | 227.1026 |

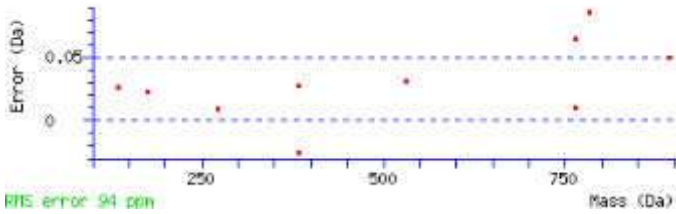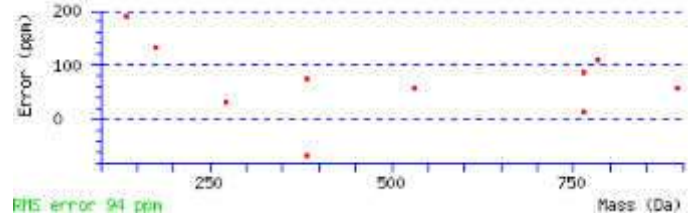

NCBI **BLAST** search of [NMHFYAEPR](#)

(Parameters: blastp, nr protein database, expect=20000, no filter, PAM30)

Other BLAST [web gateways](#)

#### All matches to this query

| Score | Mr(calc)  | Delta   | Sequence                    |
|-------|-----------|---------|-----------------------------|
| 33.6  | 1163.5182 | 0.0493  | <a href="#">NMHFYAEPR</a>   |
| 32.5  | 1163.5935 | -0.0259 | <a href="#">ITGEAYLNOR</a>  |
| 27.5  | 1163.5683 | -0.0008 | <a href="#">AAEEAYRQAR</a>  |
| 27.5  | 1163.5934 | -0.0259 | <a href="#">DREYAEIIR</a>   |
| 27.5  | 1163.5822 | -0.0147 | <a href="#">GVDEYAELLR</a>  |
| 27.5  | 1163.6186 | -0.0511 | <a href="#">IASEYAELIR</a>  |
| 27.5  | 1163.5142 | 0.0534  | <a href="#">RDEAYHSMR</a>   |
| 27.5  | 1163.5934 | -0.0259 | <a href="#">RDEAYIEIR</a>   |
| 27.5  | 1163.5934 | -0.0259 | <a href="#">SALEYAGNLAR</a> |
| 27.3  | 1163.5294 | 0.0381  | <a href="#">ASLXTALXNPR</a> |

Mascot: <http://www.matrixscience.com/>

**MATRIX SCIENCE Mascot Search Results**

**Peptide View Spot no 57**

**MS/MS Fragmentation of SSTNLPEDLKER**

Found in **gi|115471157** in **NCBI nr**, Os07g0212200 [Oryza sativa Japonica Group]

Match to Query 203: 1387.755224 from(1388.762500,1+) intensity(0.0000) index(23)

Title: Label: N11, Spot\_Id: 219847, Peak\_List\_Id: 227554, MSMS Job\_Run\_Id: 21965, Comment:

Data file C:\Documents and Settings\Administrator\Desktop\Farah-Garima 11May 2013\ppw\_N11\_136868230800.txt

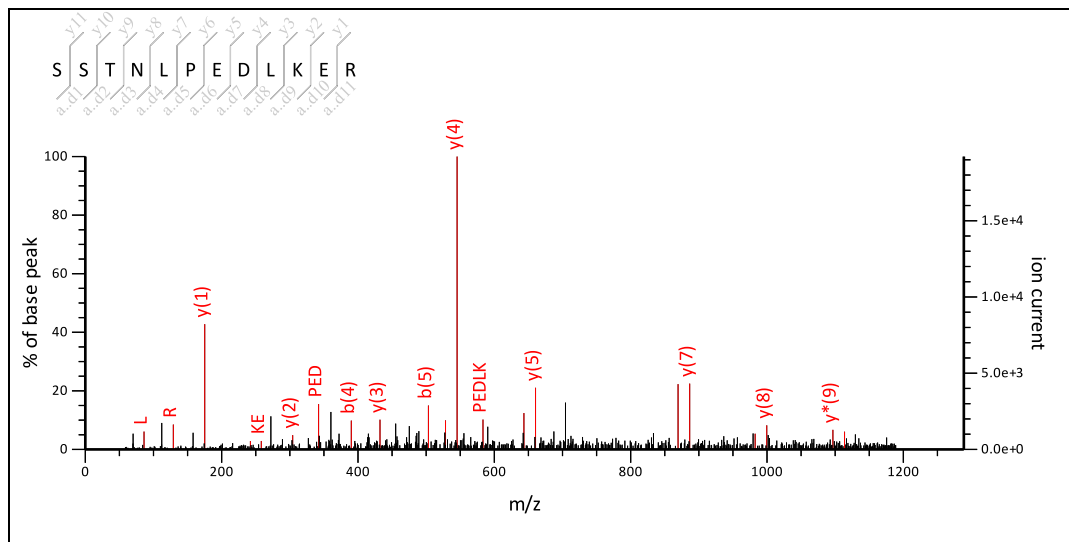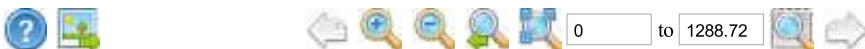

Label all possible matches  Label matches used for scoring

Monoisotopic mass of neutral peptide Mr(calc): 1387.6943

Fixed modifications: Carbamidomethyl (C) (apply to specified residues or termini only)

Ions Score: 50 Expect: 0.34

Matches : 27/208 fragment ions using 36 most intense peaks [\(help\)](#)

| #  | Immon.   | a         | a*        | a <sup>0</sup> | b         | b*        | b <sup>0</sup> | d         | d'       | Seq. | v         | w         | w'        | y         | y*        |
|----|----------|-----------|-----------|----------------|-----------|-----------|----------------|-----------|----------|------|-----------|-----------|-----------|-----------|-----------|
| 1  | 60.0444  | 60.0444   |           | 42.0338        | 88.0393   |           | 70.0287        | 44.0495   |          | S    |           |           |           |           |           |
| 2  | 60.0444  | 147.0764  |           | 129.0659       | 175.0713  |           | 157.0608       | 131.0815  |          | S    | 1269.6434 | 1268.6481 |           | 1301.6696 | 1284.6430 |
| 3  | 74.0600  | 248.1241  |           | 230.1135       | 276.1190  |           | 258.1084       | 232.1292  | 234.1084 | T    | 1168.5957 | 1181.6161 | 1183.5953 | 1214.6375 | 1197.6110 |
| 4  | 87.0553  | 362.1670  | 345.1405  | 344.1565       | 390.1619  | 373.1354  | 372.1514       | 319.1612  |          | N    | 1054.5528 | 1053.5575 |           | 1113.5899 | 1096.5633 |
| 5  | 86.0964  | 475.2511  | 458.2245  | 457.2405       | 503.2460  | 486.2195  | 485.2354       | 433.2041  |          | L    | 941.4687  | 940.4734  |           | 999.5469  | 982.5204  |
| 6  | 70.0651  | 572.3039  | 555.2773  | 554.2933       | 600.2988  | 583.2722  | 582.2882       | 546.2882  |          | P    | 844.4159  | 843.4207  |           | 886.4629  | 869.4363  |
| 7  | 102.0550 | 701.3464  | 684.3199  | 683.3359       | 729.3414  | 712.3148  | 711.3308       | 643.3410  |          | E    | 715.3733  | 714.3781  |           | 789.4101  | 772.3836  |
| 8  | 88.0393  | 816.3734  | 799.3468  | 798.3628       | 844.3683  | 827.3418  | 826.3577       | 772.3836  |          | D    | 600.3464  | 599.3511  |           | 660.3675  | 643.3410  |
| 9  | 86.0964  | 929.4575  | 912.4309  | 911.4469       | 957.4524  | 940.4258  | 939.4418       | 887.4105  |          | L    | 487.2623  | 486.2671  |           | 545.3406  | 528.3140  |
| 10 | 101.1073 | 1057.5524 | 1040.5259 | 1039.5418      | 1085.5473 | 1068.5208 | 1067.5368      | 1000.4946 |          | K    | 359.1674  | 358.1721  |           | 432.2565  | 415.2300  |
| 11 | 102.0550 | 1186.5950 | 1169.5685 | 1168.5844      | 1214.5899 | 1197.5634 | 1196.5794      | 1128.5895 |          | E    | 230.1248  | 229.1295  |           | 304.1615  | 287.1350  |
| 12 | 129.1135 |           |           |                |           |           |                |           |          | R    | 74.0237   | 73.0284   |           | 175.1190  | 158.0924  |

| Seq    | ya       | yb       | Seq    | ya       | yb       | Seq    | ya       | yb       |
|--------|----------|----------|--------|----------|----------|--------|----------|----------|
| ST     | 161.0921 | 189.0870 | STN    | 275.1350 | 303.1299 | STNL   | 388.2191 | 416.2140 |
| STNLP  | 485.2718 | 513.2667 | STNLPE | 614.3144 | 642.3093 | TN     | 188.1030 | 216.0979 |
| TNL    | 301.1870 | 329.1819 | TNLP   | 398.2398 | 426.2347 | TNLPE  | 527.2824 | 555.2773 |
| TNLPED | 642.3093 | 670.3042 | NL     | 200.1394 | 228.1343 | NLP    | 297.1921 | 325.1870 |
| NLPE   | 426.2347 | 454.2296 | NLPED  | 541.2617 | 569.2566 | NLPEDL | 654.3457 | 682.3406 |
| LP     | 183.1492 | 211.1441 | LPE    | 312.1918 | 340.1867 | LPED   | 427.2187 | 455.2136 |
| LPEDL  | 540.3028 | 568.2977 | LPEDLK | 668.3978 | 696.3927 | PE     | 199.1077 | 227.1026 |
| PED    | 314.1347 | 342.1296 | PEDL   | 427.2187 | 455.2136 | PEDLK  | 555.3137 | 583.3086 |
| PEDLKE | 684.3563 | 712.3512 | ED     | 217.0819 | 245.0768 | EDL    | 330.1660 | 358.1609 |

|                      |          |          |                       |          |                          |                    |          |                          |
|----------------------|----------|----------|-----------------------|----------|--------------------------|--------------------|----------|--------------------------|
| <a href="#">EDLK</a> | 458.2609 | 486.2558 | <a href="#">EDLKE</a> | 587.3035 | 615.2984                 | <a href="#">DL</a> | 201.1234 | 229.1183                 |
| <a href="#">DLK</a>  | 329.2183 | 357.2132 | <a href="#">DLKE</a>  | 458.2609 | 486.2558                 | <a href="#">LK</a> | 214.1914 | <a href="#">242.1863</a> |
| <a href="#">LKE</a>  | 343.2340 | 371.2289 | <a href="#">KE</a>    | 230.1499 | <a href="#">258.1448</a> |                    |          |                          |

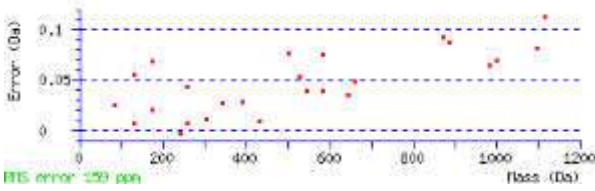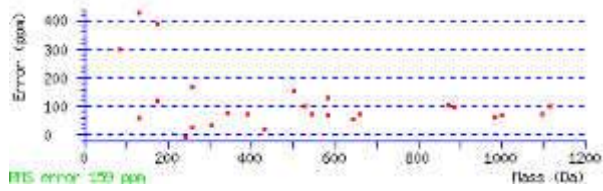

NCBI BLAST search of [SSTNLPEDLKER](#)

(Parameters: blastp, nr protein database, expect=20000, no filter, PAM30)

Other BLAST [web gateways](#)

All matches to this query

| Score | Mr(calc)  | Delta   | Sequence                        |
|-------|-----------|---------|---------------------------------|
| 50.0  | 1387.6943 | 0.0609  | <a href="#">SSTNLPEDLKER</a>    |
| 37.1  | 1387.6765 | 0.0787  | <a href="#">MQNIEPKLER</a>      |
| 36.1  | 1387.6943 | 0.0609  | <a href="#">SDDGKLIDLGAER</a>   |
| 34.3  | 1387.6765 | 0.0787  | <a href="#">MKNLPEDDAIAR</a>    |
| 33.1  | 1387.7783 | -0.0231 | <a href="#">KSGLVINLSSSAGR</a>  |
| 29.9  | 1387.7605 | -0.0053 | <a href="#">GRAMLDLLLTNR</a>    |
| 29.7  | 1387.7459 | 0.0093  | <a href="#">LFELINALDANR</a>    |
| 27.6  | 1387.6514 | 0.1038  | <a href="#">IDCNINNIQER</a>     |
| 27.5  | 1387.7572 | -0.0019 | <a href="#">IQFNINNIKER</a>     |
| 27.4  | 1387.6803 | 0.0749  | <a href="#">EAAAAAASSAREGAR</a> |

Mascot: <http://www.matrixscience.com/>



# Mascot Search Results

## Peptide View **Spot no 57**

MS/MS Fragmentation of **DLASMVALAVESPGAAAGR**

Found in **gi115471157** in **NCBIInr**, Os07g0212200 [Oryza sativa Japonica Group]

Match to Query 245: 1784.997524 from(1786.004800,1+) intensity(0.0000) index(30)

Title: Label: N11, Spot\_Id: 219847, Peak\_List\_Id: 227560, MSMS Job\_Run\_Id: 21965, Comment:

Data file C:\Documents and Settings\Administrator\Desktop\Farah-Garima 11May 2013\ppw\_N11\_136868230800.txt

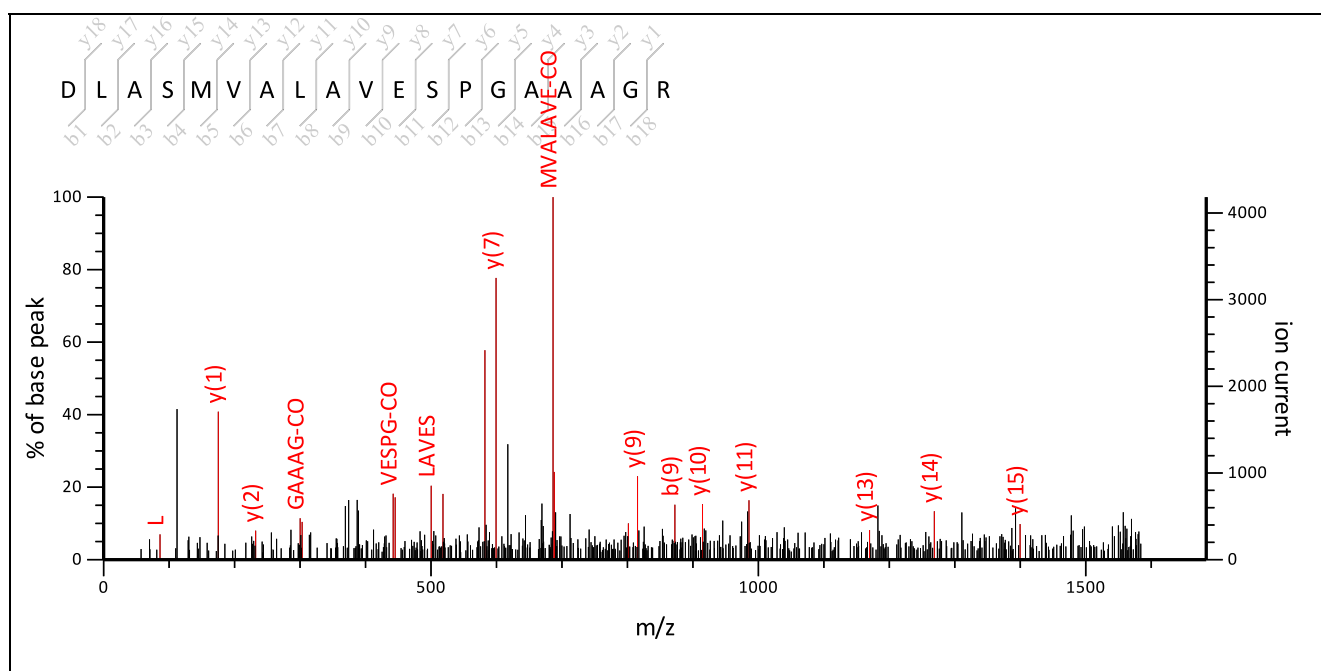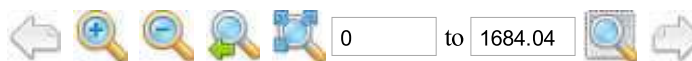

Label all possible matches  Label matches used for scoring

**Monoisotopic mass of neutral peptide Mr(calc):** 1784.9091

**Fixed modifications:** Carbamidomethyl (C) (apply to specified residues or termini only)

**Ions Score:** 88 **Expect:** 3.8e-05

**Matches:** 30/343 fragment ions using 32 most intense peaks ([help](#))

| #  | Immon.   | a         | a <sup>0</sup> | b         | b <sup>0</sup> | d         | Seq. | v         | w         | y         | y*        | y <sup>0</sup> | #  |
|----|----------|-----------|----------------|-----------|----------------|-----------|------|-----------|-----------|-----------|-----------|----------------|----|
| 1  | 88.0393  | 88.0393   | 70.0287        | 116.0342  | 98.0237        | 44.0495   | D    |           |           |           |           |                | 19 |
| 2  | 86.0964  | 201.1234  | 183.1128       | 229.1183  | 211.1077       | 159.0764  | L    | 1612.8112 | 1611.8159 | 1670.8894 | 1653.8629 | 1652.8789      | 18 |
| 3  | 44.0495  | 272.1605  | 254.1499       | 300.1554  | 282.1448       |           | A    | 1541.7741 |           | 1557.8054 | 1540.7788 | 1539.7948      | 17 |
| 4  | 60.0444  | 359.1925  | 341.1819       | 387.1874  | 369.1769       | 343.1976  | S    | 1454.7420 | 1453.7468 | 1486.7682 | 1469.7417 | 1468.7577      | 16 |
| 5  | 104.0528 | 490.2330  | 472.2224       | 518.2279  | 500.2173       | 430.2296  | M    | 1323.7015 | 1322.7063 | 1399.7362 | 1382.7097 | 1381.7256      | 15 |
| 6  | 72.0808  | 589.3014  | 571.2908       | 617.2963  | 599.2858       | 575.2858  | V    | 1224.6331 | 1237.6535 | 1268.6957 | 1251.6692 | 1250.6852      | 14 |
| 7  | 44.0495  | 660.3385  | 642.3280       | 688.3334  | 670.3229       |           | A    | 1153.5960 |           | 1169.6273 | 1152.6008 | 1151.6167      | 13 |
| 8  | 86.0964  | 773.4226  | 755.4120       | 801.4175  | 783.4069       | 731.3756  | L    | 1040.5119 | 1039.5167 | 1098.5902 | 1081.5637 | 1080.5796      | 12 |
| 9  | 44.0495  | 844.4597  | 826.4491       | 872.4546  | 854.4441       |           | A    | 969.4748  |           | 985.5061  | 968.4796  | 967.4956       | 11 |
| 10 | 72.0808  | 943.5281  | 925.5175       | 971.5230  | 953.5125       | 929.5125  | V    | 870.4064  | 883.4268  | 914.4690  | 897.4425  | 896.4585       | 10 |
| 11 | 102.0550 | 1072.5707 | 1054.5601      | 1100.5656 | 1082.5551      | 1014.5652 | E    | 741.3638  | 740.3686  | 815.4006  | 798.3741  | 797.3900       | 9  |
| 12 | 60.0444  | 1159.6027 | 1141.5922      | 1187.5977 | 1169.5871      | 1143.6078 | S    | 654.3318  | 653.3366  | 686.3580  | 669.3315  | 668.3474       | 8  |

|    |          |           |           |           |           |           |   |          |          |          |          |   |
|----|----------|-----------|-----------|-----------|-----------|-----------|---|----------|----------|----------|----------|---|
| 13 | 70.0651  | 1256.6555 | 1238.6449 | 1284.6504 | 1266.6399 | 1230.6399 | P | 557.2790 | 556.2838 | 599.3260 | 582.2994 | 7 |
| 14 | 30.0338  | 1313.6770 | 1295.6664 | 1341.6719 | 1323.6613 |           | G |          |          | 502.2732 | 485.2467 | 6 |
| 15 | 44.0495  | 1384.7141 | 1366.7035 | 1412.7090 | 1394.6984 |           | A | 429.2205 |          | 445.2518 | 428.2252 | 5 |
| 16 | 44.0495  | 1455.7512 | 1437.7406 | 1483.7461 | 1465.7355 |           | A | 358.1833 |          | 374.2146 | 357.1881 | 4 |
| 17 | 44.0495  | 1526.7883 | 1508.7777 | 1554.7832 | 1536.7727 |           | A | 287.1462 |          | 303.1775 | 286.1510 | 3 |
| 18 | 30.0338  | 1583.8098 | 1565.7992 | 1611.8047 | 1593.7941 |           | G |          |          | 232.1404 | 215.1139 | 2 |
| 19 | 129.1135 |           |           |           |           |           | R | 74.0237  | 73.0284  | 175.1190 | 158.0924 | 1 |

| Seq      | ya       | yb       | Seq      | ya       | yb       | Seq      | ya       | yb       |
|----------|----------|----------|----------|----------|----------|----------|----------|----------|
| LA       | 157.1335 | 185.1285 | LAS      | 244.1656 | 272.1605 | LASM     | 375.2061 | 403.2010 |
| LASMV    | 474.2745 | 502.2694 | LASMVA   | 545.3116 | 573.3065 | LASMVAL  | 658.3956 | 686.3906 |
| AS       | 131.0815 | 159.0764 | ASM      | 262.1220 | 290.1169 | ASMV     | 361.1904 | 389.1853 |
| ASMVA    | 432.2275 | 460.2224 | ASMVAL   | 545.3116 | 573.3065 | ASMVALA  | 616.3487 | 644.3436 |
| SM       | 191.0849 | 219.0798 | SMV      | 290.1533 | 318.1482 | SMVA     | 361.1904 | 389.1853 |
| SMVAL    | 474.2745 | 502.2694 | SMVALA   | 545.3116 | 573.3065 | SMVALAV  | 644.3800 | 672.3749 |
| MV       | 203.1213 | 231.1162 | MVA      | 274.1584 | 302.1533 | MVAL     | 387.2424 | 415.2374 |
| MVALA    | 458.2796 | 486.2745 | MVALAV   | 557.3480 | 585.3429 | MVALAVE  | 686.3906 | 714.3855 |
| VA       | 143.1179 | 171.1128 | VAL      | 256.2020 | 284.1969 | VALA     | 327.2391 | 355.2340 |
| VALAV    | 426.3075 | 454.3024 | VALAVE   | 555.3501 | 583.3450 | VALAVES  | 642.3821 | 670.3770 |
| AL       | 157.1335 | 185.1285 | ALA      | 228.1707 | 256.1656 | ALAV     | 327.2391 | 355.2340 |
| ALAVE    | 456.2817 | 484.2766 | ALAVES   | 543.3137 | 571.3086 | ALAVESP  | 640.3665 | 668.3614 |
| ALAVESPG | 697.3879 | 725.3828 | LA       | 157.1335 | 185.1285 | LAV      | 256.2020 | 284.1969 |
| LAVE     | 385.2445 | 413.2395 | LAVES    | 472.2766 | 500.2715 | LAVESP   | 569.3293 | 597.3243 |
| LAVESPG  | 626.3508 | 654.3457 | LAVESPGA | 697.3879 | 725.3828 | AV       | 143.1179 | 171.1128 |
| AVE      | 272.1605 | 300.1554 | AVES     | 359.1925 | 387.1874 | AVESP    | 456.2453 | 484.2402 |
| AVESPG   | 513.2667 | 541.2617 | AVESPGA  | 584.3039 | 612.2988 | AVESPGAA | 655.3410 | 683.3359 |
| VE       | 201.1234 | 229.1183 | VES      | 288.1554 | 316.1503 | VESP     | 385.2082 | 413.2031 |
| VESPG    | 442.2296 | 470.2245 | VESPGA   | 513.2667 | 541.2617 | VESPGAA  | 584.3039 | 612.2988 |
| VESPGAAA | 655.3410 | 683.3359 | ES       | 189.0870 | 217.0819 | ESP      | 286.1397 | 314.1347 |
| ESPG     | 343.1612 | 371.1561 | ESPGA    | 414.1983 | 442.1932 | ESPGAA   | 485.2354 | 513.2304 |
| ESPGAAA  | 556.2726 | 584.2675 | ESPGAAAG | 613.2940 | 641.2889 | SP       | 157.0972 | 185.0921 |
| SPG      | 214.1186 | 242.1135 | SPGA     | 285.1557 | 313.1506 | SPGAA    | 356.1928 | 384.1878 |
| SPGAAA   | 427.2300 | 455.2249 | SPGAAAG  | 484.2514 | 512.2463 | PG       | 127.0866 | 155.0815 |
| PGA      | 198.1237 | 226.1186 | PGAA     | 269.1608 | 297.1557 | PGAAA    | 340.1979 | 368.1928 |
| PGAAAG   | 397.2194 | 425.2143 | GA       | 101.0709 | 129.0659 | GAA      | 172.1081 | 200.1030 |
| GAAA     | 243.1452 | 271.1401 | GAAAG    | 300.1666 | 328.1615 | AA       | 115.0866 | 143.0815 |
| AAA      | 186.1237 | 214.1186 | AAAG     | 243.1452 | 271.1401 | AA       | 115.0866 | 143.0815 |
| AAG      | 172.1081 | 200.1030 | AG       | 101.0709 | 129.0659 |          |          |          |

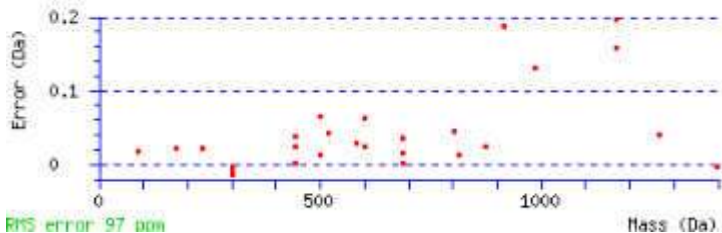

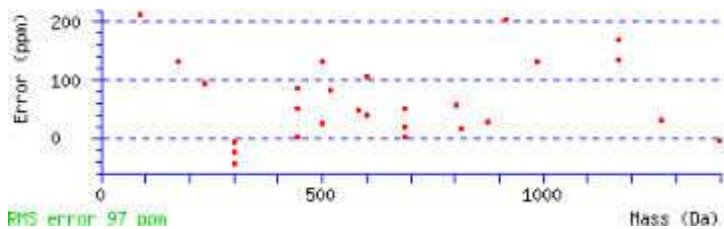

NCBI BLAST search of [DLASMVALAVESPGAAAGR](#)

(Parameters: blastp, nr protein database, expect=20000, no filter, PAM30)

Other BLAST [web gateways](#)

#### All matches to this query

| Score | Mr(calc)  | Delta   | Sequence                            |
|-------|-----------|---------|-------------------------------------|
| 88.3  | 1784.9091 | 0.0885  | <a href="#">DLASMVALAVESPGAAAGR</a> |
| 30.8  | 1784.9454 | 0.0521  | <a href="#">EREIAAMLNLPSTVK</a>     |
| 29.9  | 1785.0148 | -0.0173 | <a href="#">ESRAPFIIALAGSVAVGK</a>  |
| 29.9  | 1785.0620 | -0.0645 | <a href="#">LAMLMGALALLTSLVR</a>    |
| 28.1  | 1784.8978 | 0.0997  | <a href="#">AGVALPVEAVEVEAMER</a>   |
| 26.9  | 1784.9892 | 0.0083  | <a href="#">IEASLMALAVNKPMVAK</a>   |
| 25.4  | 1784.8978 | 0.0997  | <a href="#">EMIAKLDAIGPEVDER</a>    |
| 25.0  | 1784.9342 | 0.0633  | <a href="#">LELATVSDQMPNGAIVK</a>   |
| 24.8  | 1784.9594 | 0.0381  | <a href="#">ESATLVLDLPITVGMPVK</a>  |
| 24.8  | 1784.8918 | 0.1058  | <a href="#">WLSDGAGRAALADAQQR</a>   |

Mascot: <http://www.matrixscience.com/>



# Mascot Search Results

## Peptide View **Spot no 57**

MS/MS Fragmentation of **DLASMVALAVESPGAAAGR**

Found in **gij115471157** in **NCBI Inr**, Os07g0212200 [Oryza sativa Japonica Group]

Match to Query 247: 1800.980924 from(1801.988200,1+) intensity(0.0000) index(31)

Title: Label: N11, Spot\_Id: 219847, Peak\_List\_Id: 227578, MSMS Job\_Run\_Id: 21965, Comment:

Data file C:\Documents and Settings\Administrator\Desktop\Farah-Garima 11May 2013\ppw\_N11\_136868230800.txt

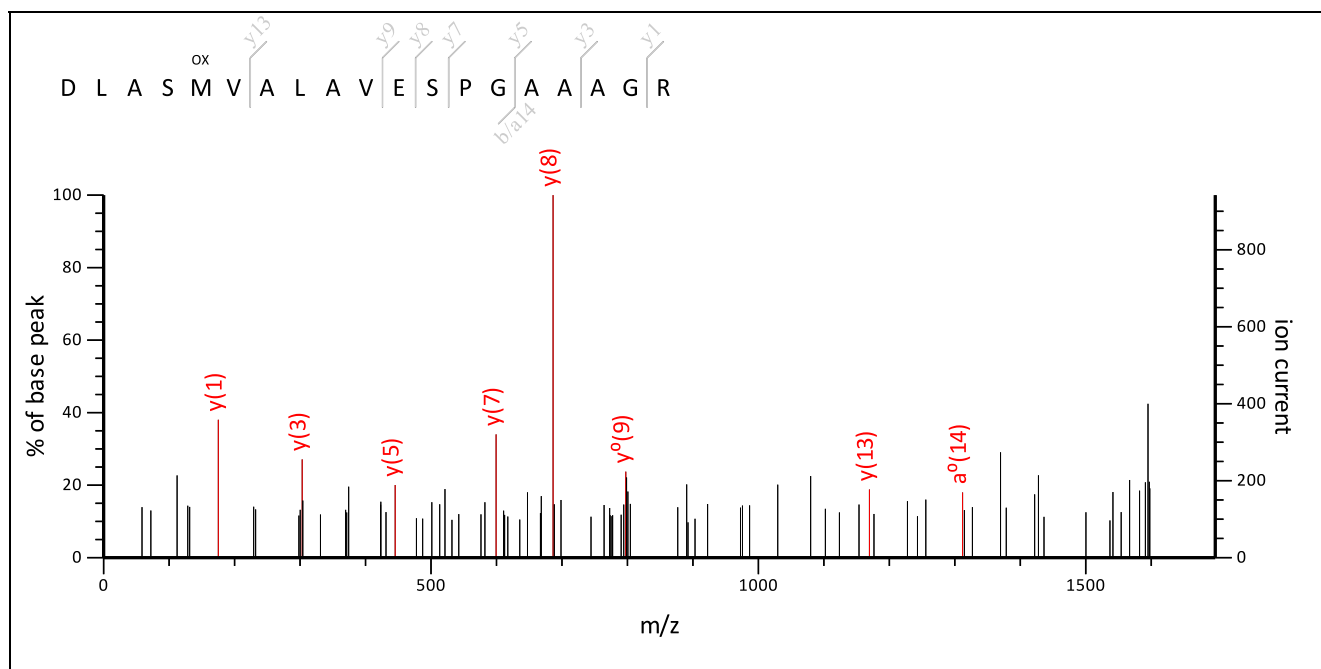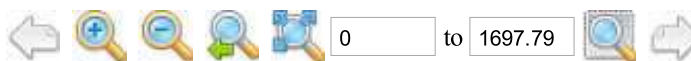

0 to 1697.79

Label all possible matches  Label matches used for scoring

**Monoisotopic mass of neutral peptide Mr(calc):** 1800.9040

**Fixed modifications:** Carbamidomethyl (C) (apply to specified residues or termini only)

**Variable modifications:**

**M5** : Oxidation (M), with neutral losses 0.0000 (shown in table), 63.9983

**Ions Score:** 23 **Expect:** 1.3e+02

**Matches** : 9/460 fragment ions using 16 most intense peaks ([help](#))

| # | Immon.   | a        | a <sup>0</sup> | b        | b <sup>0</sup> | d        | Seq. | v         | w         | y         | y*        | y <sup>0</sup> | #  |
|---|----------|----------|----------------|----------|----------------|----------|------|-----------|-----------|-----------|-----------|----------------|----|
| 1 | 88.0393  | 88.0393  | 70.0287        | 116.0342 | 98.0237        | 44.0495  | D    |           |           |           |           |                | 19 |
| 2 | 86.0964  | 201.1234 | 183.1128       | 229.1183 | 211.1077       | 159.0764 | L    | 1628.8061 | 1627.8108 | 1686.8843 | 1669.8578 | 1668.8738      | 18 |
| 3 | 44.0495  | 272.1605 | 254.1499       | 300.1554 | 282.1448       |          | A    | 1557.7690 |           | 1573.8003 | 1556.7737 | 1555.7897      | 17 |
| 4 | 60.0444  | 359.1925 | 341.1819       | 387.1874 | 369.1769       | 343.1976 | S    | 1470.7369 | 1469.7417 | 1502.7632 | 1485.7366 | 1484.7526      | 16 |
| 5 | 120.0478 | 506.2279 | 488.2173       | 534.2228 | 516.2123       | 430.2296 | M    | 1323.7015 | 1322.7063 | 1415.7311 | 1398.7046 | 1397.7206      | 15 |
| 6 | 72.0808  | 605.2963 | 587.2858       | 633.2912 | 615.2807       | 591.2807 | V    | 1224.6331 | 1237.6535 | 1268.6957 | 1251.6692 | 1250.6852      | 14 |
| 7 | 44.0495  | 676.3334 | 658.3229       | 704.3284 | 686.3178       |          | A    | 1153.5960 |           | 1169.6273 | 1152.6008 | 1151.6167      | 13 |
| 8 | 86.0964  | 789.4175 | 771.4069       | 817.4124 | 799.4019       | 747.3706 | L    | 1040.5119 | 1039.5167 | 1098.5902 | 1081.5637 | 1080.5796      | 12 |
| 9 | 44.0495  | 860.4546 | 842.4441       | 888.4495 | 870.4390       |          | A    | 969.4748  |           | 985.5061  | 968.4796  | 967.4956       | 11 |



|    |          |           |           |           |           |           |   |          |          |          |          |          |    |
|----|----------|-----------|-----------|-----------|-----------|-----------|---|----------|----------|----------|----------|----------|----|
| 10 | 72.0808  | 959.5230  | 941.5125  | 987.5179  | 969.5074  | 945.5074  | V | 870.4064 | 883.4268 | 914.4690 | 897.4425 | 896.4585 | 10 |
| 11 | 102.0550 | 1088.5656 | 1070.5551 | 1116.5605 | 1098.5500 | 1030.5601 | E | 741.3638 | 740.3686 | 815.4006 | 798.3741 | 797.3900 | 9  |
| 12 | 60.0444  | 1175.5977 | 1157.5871 | 1203.5926 | 1185.5820 | 1159.6027 | S | 654.3318 | 653.3366 | 686.3580 | 669.3315 | 668.3474 | 8  |
| 13 | 70.0651  | 1272.6504 | 1254.6399 | 1300.6453 | 1282.6348 | 1246.6348 | P | 557.2790 | 556.2838 | 599.3260 | 582.2994 |          | 7  |
| 14 | 30.0338  | 1329.6719 | 1311.6613 | 1357.6668 | 1339.6562 |           | G |          |          | 502.2732 | 485.2467 |          | 6  |
| 15 | 44.0495  | 1400.7090 | 1382.6984 | 1428.7039 | 1410.6933 |           | A | 429.2205 |          | 445.2518 | 428.2252 |          | 5  |
| 16 | 44.0495  | 1471.7461 | 1453.7355 | 1499.7410 | 1481.7305 |           | A | 358.1833 |          | 374.2146 | 357.1881 |          | 4  |
| 17 | 44.0495  | 1542.7832 | 1524.7727 | 1570.7781 | 1552.7676 |           | A | 287.1462 |          | 303.1775 | 286.1510 |          | 3  |
| 18 | 30.0338  | 1599.8047 | 1581.7941 | 1627.7996 | 1609.7890 |           | G |          |          | 232.1404 | 215.1139 |          | 2  |
| 19 | 129.1135 |           |           |           |           |           | R | 74.0237  | 73.0284  | 175.1190 | 158.0924 |          | 1  |

| Seq      | ya       | yb       | Seq      | ya       | yb       | Seq      | ya       | yb       |
|----------|----------|----------|----------|----------|----------|----------|----------|----------|
| LA       | 157.1335 | 185.1285 | LAS      | 244.1656 | 272.1605 | LASM     | 391.2010 | 419.1959 |
| LASMV    | 490.2694 | 518.2643 | LASMVA   | 561.3065 | 589.3014 | LASMVAL  | 674.3906 | 702.3855 |
| AS       | 131.0815 | 159.0764 | ASM      | 278.1169 | 306.1118 | ASMV     | 377.1853 | 405.1802 |
| ASMVA    | 448.2224 | 476.2173 | ASMVAL   | 561.3065 | 589.3014 | ASMVALA  | 632.3436 | 660.3385 |
| SM       | 207.0798 | 235.0747 | SMV      | 306.1482 | 334.1431 | SMVA     | 377.1853 | 405.1802 |
| SMVAL    | 490.2694 | 518.2643 | SMVALA   | 561.3065 | 589.3014 | SMVALAV  | 660.3749 | 688.3698 |
| MV       | 219.1162 | 247.1111 | MVA      | 290.1533 | 318.1482 | MVAL     | 403.2374 | 431.2323 |
| MVALA    | 474.2745 | 502.2694 | MVALAV   | 573.3429 | 601.3378 | VA       | 143.1179 | 171.1128 |
| VAL      | 256.2020 | 284.1969 | VALA     | 327.2391 | 355.2340 | VALAV    | 426.3075 | 454.3024 |
| VALAVE   | 555.3501 | 583.3450 | VALAVES  | 642.3821 | 670.3770 | AL       | 157.1335 | 185.1285 |
| ALA      | 228.1707 | 256.1656 | ALAV     | 327.2391 | 355.2340 | ALAVE    | 456.2817 | 484.2766 |
| ALAVES   | 543.3137 | 571.3086 | ALAVESP  | 640.3665 | 668.3614 | ALAVESPG | 697.3879 | 725.3828 |
| LA       | 157.1335 | 185.1285 | LAV      | 256.2020 | 284.1969 | LAVE     | 385.2445 | 413.2395 |
| LAVES    | 472.2766 | 500.2715 | LAVESP   | 569.3293 | 597.3243 | LAVESPG  | 626.3508 | 654.3457 |
| LAVESPGA | 697.3879 | 725.3828 | AV       | 143.1179 | 171.1128 | AVE      | 272.1605 | 300.1554 |
| AVES     | 359.1925 | 387.1874 | AVESP    | 456.2453 | 484.2402 | AVESPG   | 513.2667 | 541.2617 |
| AVESPGA  | 584.3039 | 612.2988 | AVESPGAA | 655.3410 | 683.3359 | VE       | 201.1234 | 229.1183 |
| VES      | 288.1554 | 316.1503 | VESP     | 385.2082 | 413.2031 | VESPG    | 442.2296 | 470.2245 |
| VESPGA   | 513.2667 | 541.2617 | VESPGAA  | 584.3039 | 612.2988 | VESPGAAA | 655.3410 | 683.3359 |
| ES       | 189.0870 | 217.0819 | ESP      | 286.1397 | 314.1347 | ESPG     | 343.1612 | 371.1561 |
| ESPGA    | 414.1983 | 442.1932 | ESPGAA   | 485.2354 | 513.2304 | ESPGAAA  | 556.2726 | 584.2675 |
| ESPGAAAG | 613.2940 | 641.2889 | SP       | 157.0972 | 185.0921 | SPG      | 214.1186 | 242.1135 |
| SPGA     | 285.1557 | 313.1506 | SPGAA    | 356.1928 | 384.1878 | SPGAAA   | 427.2300 | 455.2249 |
| SPGAAAG  | 484.2514 | 512.2463 | PG       | 127.0866 | 155.0815 | PGA      | 198.1237 | 226.1186 |
| PGAA     | 269.1608 | 297.1557 | PGAAA    | 340.1979 | 368.1928 | PGAAAG   | 397.2194 | 425.2143 |
| GA       | 101.0709 | 129.0659 | GAA      | 172.1081 | 200.1030 | GAAA     | 243.1452 | 271.1401 |
| GAAAG    | 300.1666 | 328.1615 | AA       | 115.0866 | 143.0815 | AAA      | 186.1237 | 214.1186 |
| AAAG     | 243.1452 | 271.1401 | AA       | 115.0866 | 143.0815 | AAG      | 172.1081 | 200.1030 |
| AG       | 101.0709 | 129.0659 |          |          |          |          |          |          |

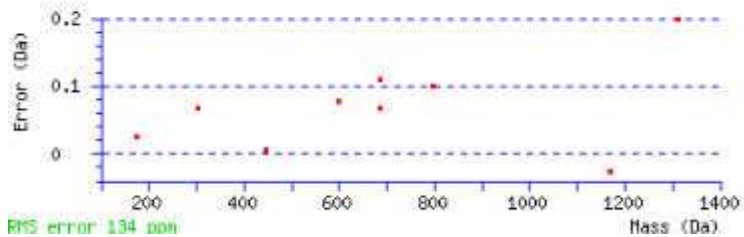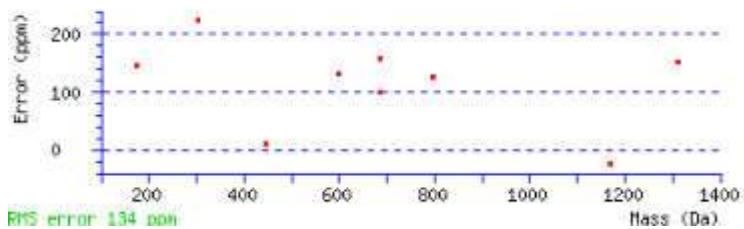

NCBI BLAST search of [DLASMVALAVESPGAAAGR](#)

(Parameters: blastp, nr protein database, expect=20000, no filter, PAM30)

Other BLAST [web gateways](#)

#### All matches to this query

| Score | Mr(calc)  | Delta   | Sequence                            |
|-------|-----------|---------|-------------------------------------|
| 23.5  | 1800.9040 | 0.0769  | <a href="#">DLASMVALAVESPGAAAGR</a> |
| 15.9  | 1801.0686 | -0.0877 | <a href="#">KPRLPGPSLLSKPAQR</a>    |
| 14.5  | 1800.9078 | 0.0731  | <a href="#">SQQLGSATGNTASAKPQR</a>  |
| 14.4  | 1800.8828 | 0.0981  | <a href="#">QLTWGETPELMAAAQR</a>    |
| 12.0  | 1800.9516 | 0.0294  | <a href="#">IMNIQARLETEIAAGR</a>    |
| 10.3  | 1800.8684 | 0.1125  | <a href="#">IESMRALGMYLSMQR</a>     |
| 10.2  | 1800.8101 | 0.1709  | <a href="#">MEPEIDDFHKDAAAGR</a>    |
| 10.1  | 1800.8900 | 0.0909  | <a href="#">MTTAAAARGAAPESAAQR</a>  |
| 9.3   | 1800.9330 | 0.0480  | <a href="#">ALDASADEILGVRTSAGR</a>  |
| 9.2   | 1800.8966 | 0.0843  | <a href="#">TTALEEQNTQAAIAGR</a>    |

Mascot: <http://www.matrixscience.com/>



# Mascot Search Results

## Peptide View **Spot no 58**

MS/MS Fragmentation of **EAAYYQQGAR**

Found in **gi|108864048** in **NCBIInr**, Fructose-bisphosphate aldolase, chloroplast precursor, putative, expressed [Oryza sativa Japonica Group]

Match to Query 82: 1155.571324 from(1156.578600,1+) intensity(0.0000) index(9)

Title: Label: C7, Spot\_Id: 219772, Peak\_List\_Id: 226176, MSMS Job\_Run\_Id: 21836, Comment:

Data file C:\Documents and Settings\Administrator\Desktop\Farah-Garima 11May 2013\ppw\_C7\_136859909200.txt

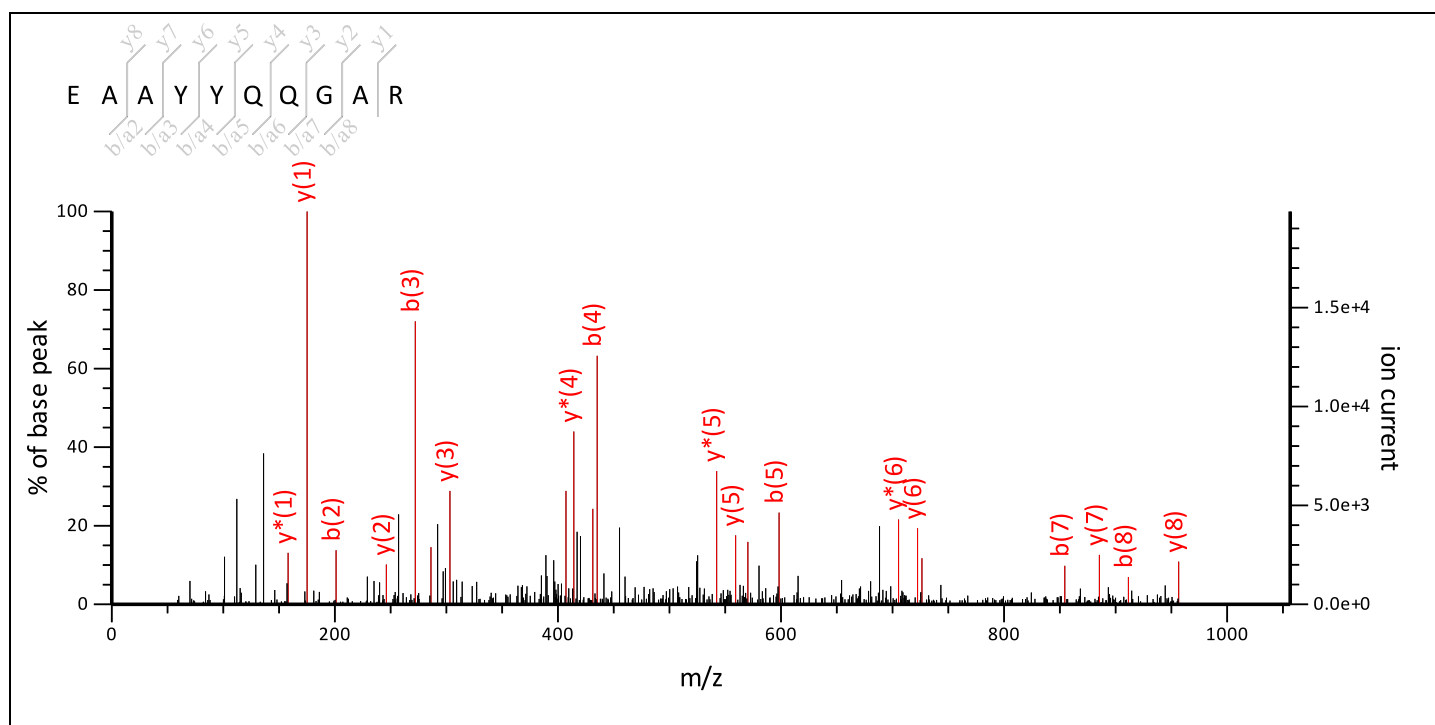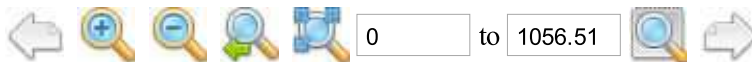

Label all possible matches  Label matches used for scoring

**Monoisotopic mass of neutral peptide Mr(calc):** 1155.5309

**Fixed modifications:** Carbamidomethyl (C) (apply to specified residues or termini only)

**Ions Score:** 56 **Expect:** 0.086

**Matches :** 22/44 fragment ions using 36 most intense peaks ([help](#))

| # | a        | a*       | b        | b*       | Seq. | y         | y*        | #  |
|---|----------|----------|----------|----------|------|-----------|-----------|----|
| 1 | 102.0550 |          | 130.0499 |          | E    |           |           | 10 |
| 2 | 173.0921 |          | 201.0870 |          | A    | 1027.4956 | 1010.4690 | 9  |
| 3 | 244.1292 |          | 272.1241 |          | A    | 956.4585  | 939.4319  | 8  |
| 4 | 407.1925 |          | 435.1874 |          | Y    | 885.4213  | 868.3948  | 7  |
| 5 | 570.2558 |          | 598.2508 |          | Y    | 722.3580  | 705.3315  | 6  |
| 6 | 698.3144 | 681.2879 | 726.3093 | 709.2828 | Q    | 559.2947  | 542.2681  | 5  |
| 7 | 826.3730 | 809.3464 | 854.3679 | 837.3414 | Q    | 431.2361  | 414.2096  | 4  |

|    |          |          |                 |          |   |                 |                 |   |
|----|----------|----------|-----------------|----------|---|-----------------|-----------------|---|
| 8  | 883.3945 | 866.3679 | <b>911.3894</b> | 894.3628 | G | <b>303.1775</b> | <b>286.1510</b> | 3 |
| 9  | 954.4316 | 937.4050 | 982.4265        | 965.3999 | A | <b>246.1561</b> | 229.1295        | 2 |
| 10 |          |          |                 |          | R | <b>175.1190</b> | <b>158.0924</b> | 1 |

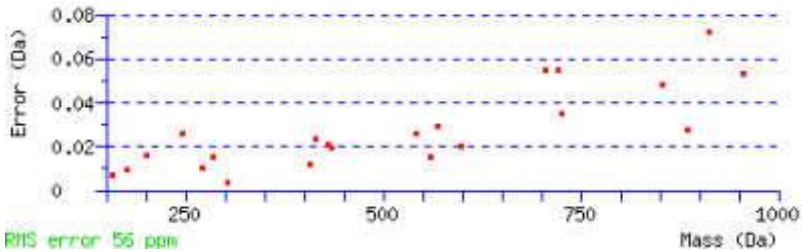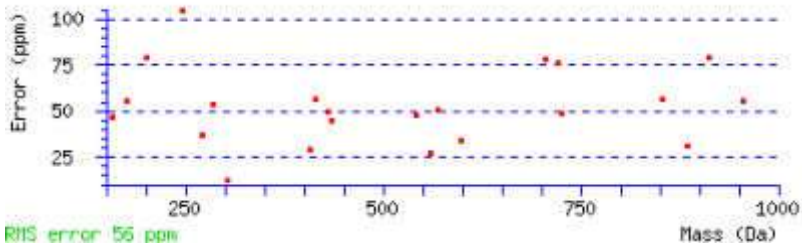

NCBI **BLAST** search of [EAAYYQOGAR](#)

(Parameters: blastp, nr protein database, expect=20000, no filter, PAM30)

Other BLAST [web gateways](#)

#### All matches to this query

| Score | Mr(calc)  | Delta   | Sequence                     |
|-------|-----------|---------|------------------------------|
| 56.3  | 1155.5309 | 0.0405  | <a href="#">EAAYYQOGAR</a>   |
| 42.3  | 1155.5672 | 0.0041  | <a href="#">AAEYKQGAR</a>    |
| 35.6  | 1155.6360 | -0.0647 | <a href="#">TVAIAAAQOGAR</a> |
| 29.7  | 1155.5461 | 0.0252  | <a href="#">RDYYTWPR</a>     |
| 27.3  | 1155.5713 | 0.0001  | <a href="#">AYPNLYYPR</a>    |
| 27.3  | 1155.5672 | 0.0041  | <a href="#">DREASYFIR</a>    |
| 27.3  | 1155.5924 | -0.0211 | <a href="#">ESTLKYYPR</a>    |
| 27.3  | 1155.6110 | -0.0397 | <a href="#">MKIVSYPR</a>     |
| 27.3  | 1155.5746 | -0.0033 | <a href="#">NAILMYPR</a>     |
| 24.7  | 1155.6360 | -0.0647 | <a href="#">SIAAAQQALAGR</a> |

Mascot: <http://www.matrixscience.com/>



# Mascot Search Results

## Peptide View **Spot no 58**

MS/MS Fragmentation of **LASIGLENTEANR**

Found in **gi|108864048** in **NCBIInr**, Fructose-bisphosphate aldolase, chloroplast precursor, putative, expressed [Oryza sativa Japonica Group]

Match to Query 134: 1386.757224 from(1387.764500,1+) intensity(0.0000) index(15)

Title: Label: C7, Spot\_Id: 219772, Peak\_List\_Id: 226182, MSMS Job\_Run\_Id: 21836, Comment:

Data file C:\Documents and Settings\Administrator\Desktop\Farah-Garima 11May 2013\ppw\_C7\_136859909200.txt

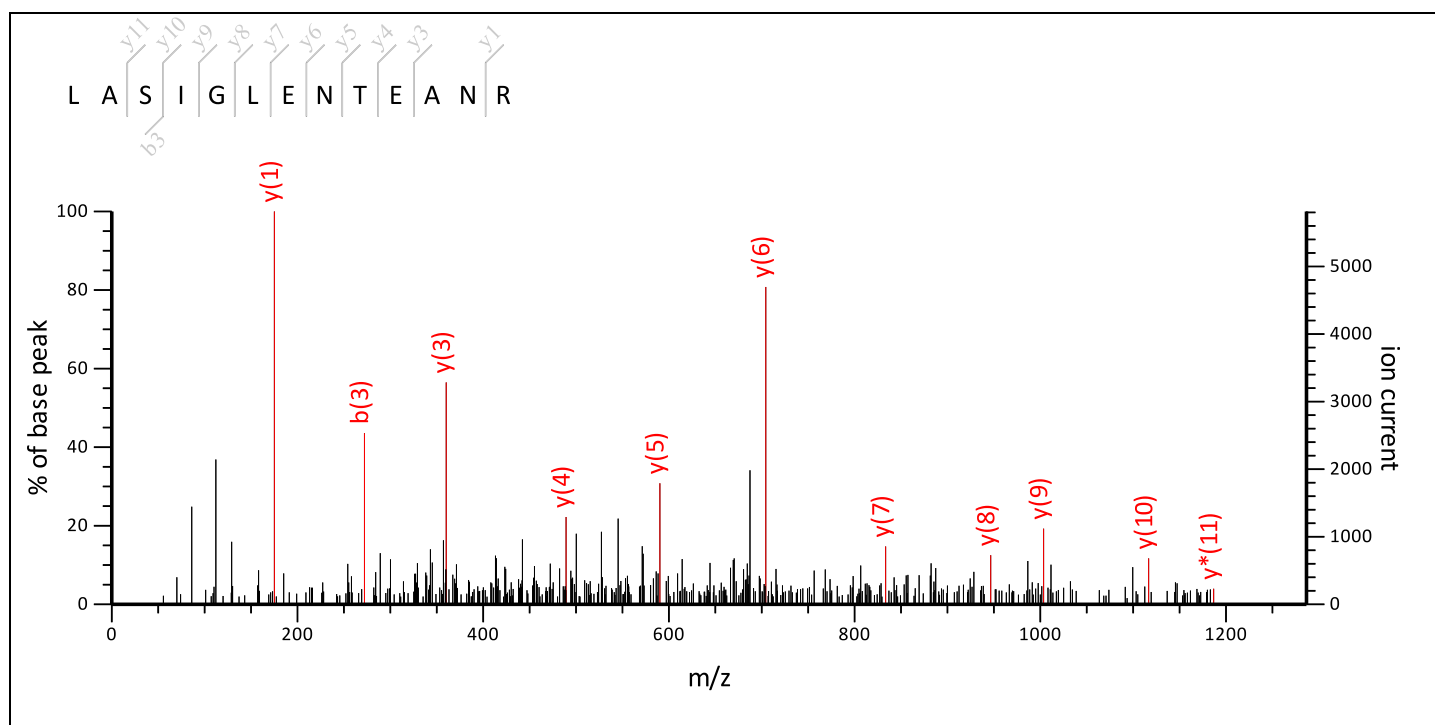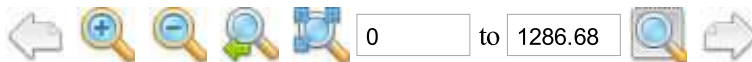

Label all possible matches  Label matches used for scoring

**Monoisotopic mass of neutral peptide Mr(calc):** 1386.7103

**Fixed modifications:** Carbamidomethyl (C) (apply to specified residues or termini only)

**Ions Score:** 91 **Expect:** 2.4e-05

**Matches :** 12/58 fragment ions using 12 most intense peaks ([help](#))

| # | a        | a* | b               | b* | Seq. | y                | y*               | #  |
|---|----------|----|-----------------|----|------|------------------|------------------|----|
| 1 | 86.0964  |    | 114.0913        |    | L    |                  |                  | 13 |
| 2 | 157.1335 |    | 185.1285        |    | A    | 1274.6335        | 1257.6070        | 12 |
| 3 | 244.1656 |    | <b>272.1605</b> |    | S    | 1203.5964        | <b>1186.5699</b> | 11 |
| 4 | 357.2496 |    | 385.2445        |    | I    | <b>1116.5644</b> | 1099.5378        | 10 |
| 5 | 414.2711 |    | 442.2660        |    | G    | <b>1003.4803</b> | 986.4538         | 9  |
| 6 | 527.3552 |    | 555.3501        |    | L    | <b>946.4588</b>  | 929.4323         | 8  |
| 7 | 656.3978 |    | 684.3927        |    | E    | <b>833.3748</b>  | 816.3482         | 7  |

|    |           |           |           |           |   |                 |                 |   |
|----|-----------|-----------|-----------|-----------|---|-----------------|-----------------|---|
| 8  | 770.4407  | 753.4141  | 798.4356  | 781.4090  | N | <b>704.3322</b> | 687.3056        | 6 |
| 9  | 871.4884  | 854.4618  | 899.4833  | 882.4567  | T | <b>590.2893</b> | 573.2627        | 5 |
| 10 | 1000.5310 | 983.5044  | 1028.5259 | 1011.4993 | E | <b>489.2416</b> | 472.2150        | 4 |
| 11 | 1071.5681 | 1054.5415 | 1099.5630 | 1082.5364 | A | <b>360.1990</b> | 343.1724        | 3 |
| 12 | 1185.6110 | 1168.5844 | 1213.6059 | 1196.5794 | N | 289.1619        | <b>272.1353</b> | 2 |
| 13 |           |           |           |           | R | <b>175.1190</b> | 158.0924        | 1 |

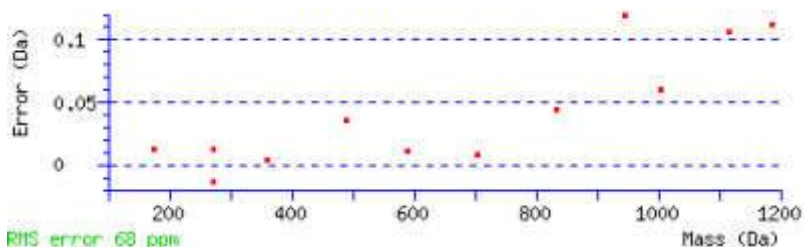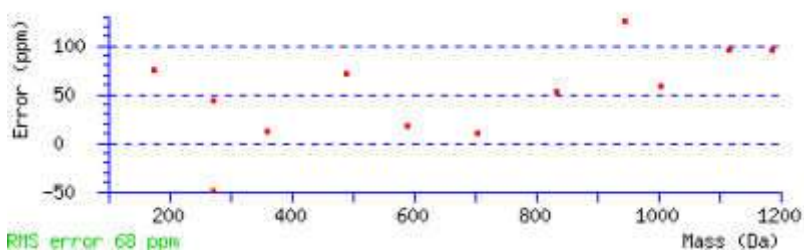

NCBI BLAST search of [LASIGLENTEANR](#)

(Parameters: blastp, nr protein database, expect=20000, no filter, PAM30)

Other BLAST [web gateways](#)

#### All matches to this query

| Score | Mr(calc)  | Delta   | Sequence                        |
|-------|-----------|---------|---------------------------------|
| 91.4  | 1386.7103 | 0.0470  | <a href="#">LASIGLENTEANR</a>   |
| 47.2  | 1386.7619 | -0.0047 | <a href="#">AAELGLEIRYPR</a>    |
| 37.4  | 1386.7467 | 0.0106  | <a href="#">AVTLLADSKEQGR</a>   |
| 36.7  | 1386.7507 | 0.0065  | <a href="#">VTALFDGELGLPR</a>   |
| 34.6  | 1386.6739 | 0.0833  | <a href="#">SLAAVLGGEDDGAGR</a> |
| 34.2  | 1386.7177 | 0.0396  | <a href="#">LEARMDEIGIPK</a>    |
| 33.9  | 1386.6375 | 0.1197  | <a href="#">TELPNENTEQGR</a>    |
| 33.2  | 1386.7289 | 0.0283  | <a href="#">TVAAVLEEMRPR</a>    |
| 32.1  | 1386.6449 | 0.1123  | <a href="#">AAELGLAEMDDPR</a>   |
| 28.1  | 1386.7871 | -0.0299 | <a href="#">LASIFSDVLGLPR</a>   |

Mascot: <http://www.matrixscience.com/>

# MATRIX SCIENCE Mascot Search Results

## Peptide View Spot no 58

MS/MS Fragmentation of **TVVSIPNGPSELAVK**

Found in **gi|108864048** in **NCBI nr**, Fructose-bisphosphate aldolase, chloroplast precursor, putative, expressed [Oryza sativa Japonica Group]

Match to Query 159: 1509.866724 from(1510.874000,1+) intensity(0.0000) index(18)

Title: Label: C7, Spot\_Id: 219772, Peak\_List\_Id: 226201, MSMS Job\_Run\_Id: 21836, Comment:

Data file C:\Documents and Settings\Administrator\Desktop\Farah-Garima 11May 2013\ppw\_C7\_136859909200.txt

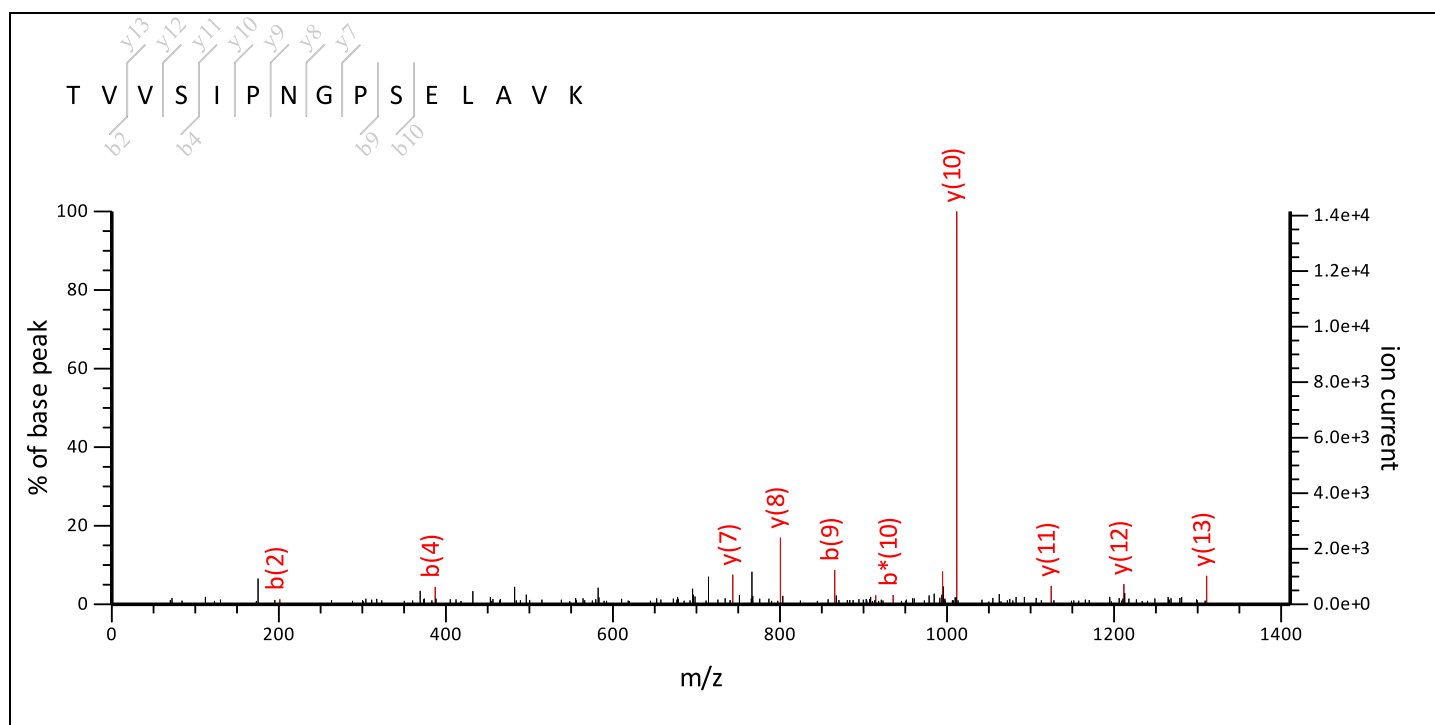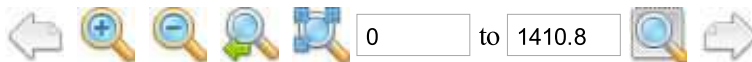

Label all possible matches  Label matches used for scoring

**Monoisotopic mass of neutral peptide Mr(calc):** 1509.8403

**Fixed modifications:** Carbamidomethyl (C) (apply to specified residues or termini only)

**Ions Score:** 35 **Expect:** 7.3

**Matches:** 12/72 fragment ions using 26 most intense peaks ([help](#))

| # | a        | a*       | b        | b*       | Seq. | y         | y*        | #  |
|---|----------|----------|----------|----------|------|-----------|-----------|----|
| 1 | 74.0600  |          | 102.0550 |          | T    |           |           | 15 |
| 2 | 173.1285 |          | 201.1234 |          | V    | 1409.7999 | 1392.7733 | 14 |
| 3 | 272.1969 |          | 300.1918 |          | V    | 1310.7314 | 1293.7049 | 13 |
| 4 | 359.2289 |          | 387.2238 |          | S    | 1211.6630 | 1194.6365 | 12 |
| 5 | 472.3130 |          | 500.3079 |          | I    | 1124.6310 | 1107.6045 | 11 |
| 6 | 569.3657 |          | 597.3606 |          | P    | 1011.5469 | 994.5204  | 10 |
| 7 | 683.4087 | 666.3821 | 711.4036 | 694.3770 | N    | 914.4942  | 897.4676  | 9  |



|    |           |           |           |           |   |          |          |   |
|----|-----------|-----------|-----------|-----------|---|----------|----------|---|
| 8  | 740.4301  | 723.4036  | 768.4250  | 751.3985  | G | 800.4512 | 783.4247 | 8 |
| 9  | 837.4829  | 820.4563  | 865.4778  | 848.4512  | P | 743.4298 | 726.4032 | 7 |
| 10 | 924.5149  | 907.4884  | 952.5098  | 935.4833  | S | 646.3770 | 629.3505 | 6 |
| 11 | 1053.5575 | 1036.5310 | 1081.5524 | 1064.5259 | E | 559.3450 | 542.3184 | 5 |
| 12 | 1166.6416 | 1149.6150 | 1194.6365 | 1177.6099 | L | 430.3024 | 413.2758 | 4 |
| 13 | 1237.6787 | 1220.6521 | 1265.6736 | 1248.6470 | A | 317.2183 | 300.1918 | 3 |
| 14 | 1336.7471 | 1319.7205 | 1364.7420 | 1347.7155 | V | 246.1812 | 229.1547 | 2 |
| 15 |           |           |           |           | K | 147.1128 | 130.0863 | 1 |

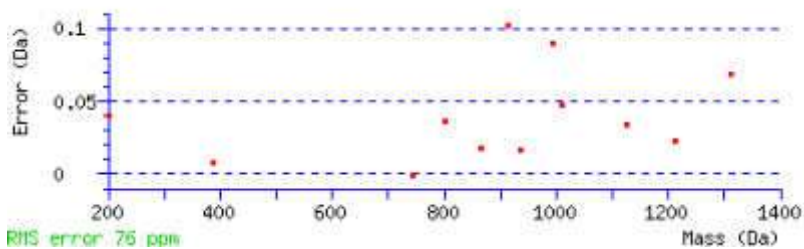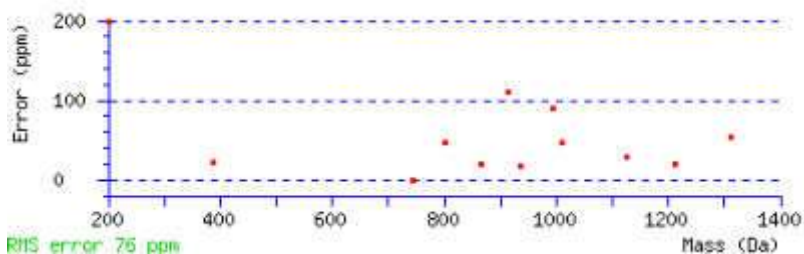

NCBI **BLAST** search of [TVVSIPNGPSELAVK](#)

(Parameters: blastp, nr protein database, expect=20000, no filter, PAM30)

Other BLAST [web gateways](#)

#### All matches to this query

| Score | Mr(calc)  | Delta   | Sequence                         |
|-------|-----------|---------|----------------------------------|
| 35.2  | 1509.8403 | 0.0265  | <a href="#">TVVSIPNGPSELAVK</a>  |
| 30.7  | 1509.7180 | 0.1487  | <a href="#">AEVSMGAVQRCFR</a>    |
| 26.9  | 1509.8589 | 0.0079  | <a href="#">LSVSLPMLPSTLR</a>    |
| 24.6  | 1509.8402 | 0.0265  | <a href="#">EAVSLPNPISLKDK</a>   |
| 24.2  | 1509.9395 | -0.0728 | <a href="#">TVVSLFPLLRPR</a>     |
| 24.2  | 1509.7675 | 0.0992  | <a href="#">VTVSLDSLSDATFR</a>   |
| 24.2  | 1509.9243 | -0.0575 | <a href="#">VTVTVSSPKKPVIR</a>   |
| 24.1  | 1509.7787 | 0.0880  | <a href="#">DALSLSAIEAHVR</a>    |
| 23.6  | 1509.7787 | 0.0880  | <a href="#">LSVSLTFSGTGTNAR</a>  |
| 23.0  | 1509.8151 | 0.0516  | <a href="#">EAVSIPIAAAGGLDAR</a> |

Mascot: <http://www.matrixscience.com/>



# Mascot Search Results

## Peptide View **Spot no 58**

MS/MS Fragmentation of **GILAMDESNATCGKR**

Found in **gi|108864048** in **NCBI**nr, Fructose-bisphosphate aldolase, chloroplast precursor, putative, expressed [Oryza sativa Japonica Group]

Match to Query 171: 1621.811924 from(1622.819200,1+) intensity(0.0000) index(20)

Title: Label: C7, Spot\_Id: 219772, Peak\_List\_Id: 226181, MSMS Job\_Run\_Id: 21836, Comment:

Data file C:\Documents and Settings\Administrator\Desktop\Farah-Garima 11May 2013\ppw\_C7\_136859909200.txt

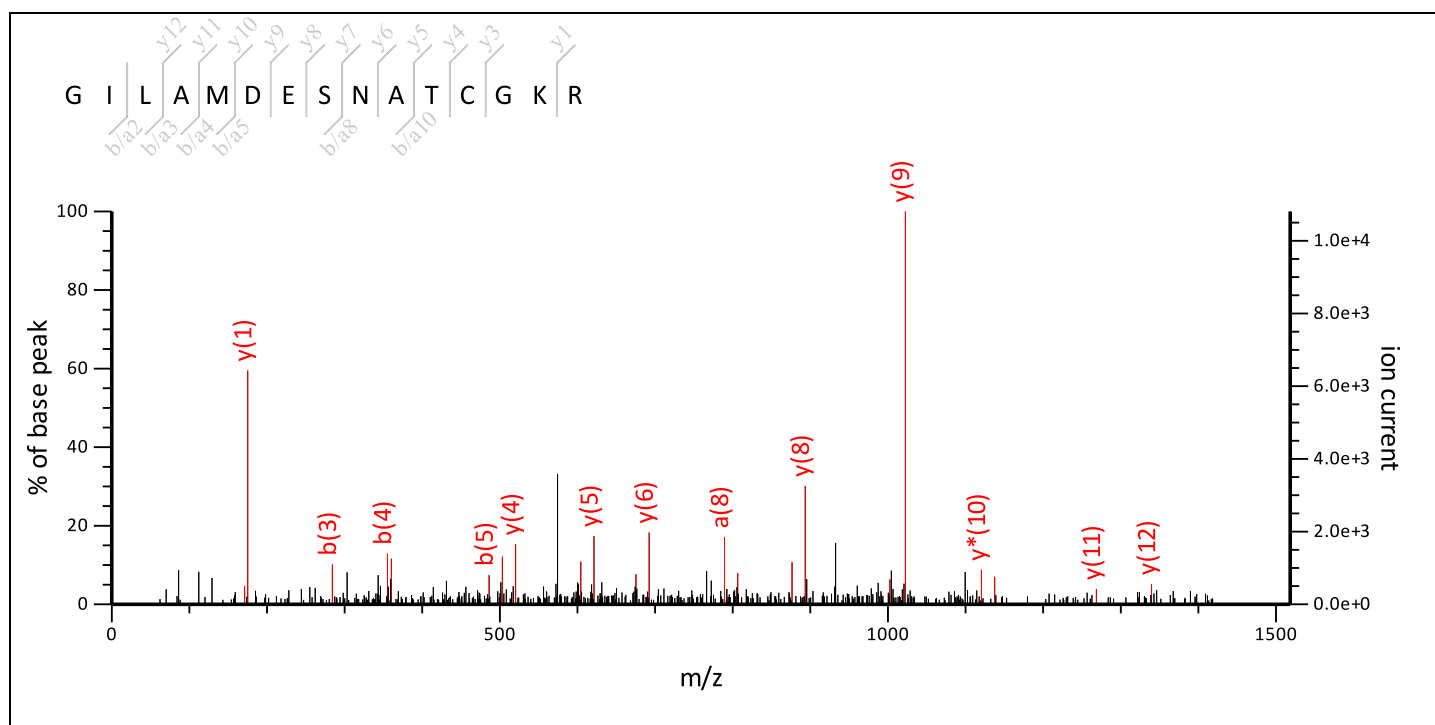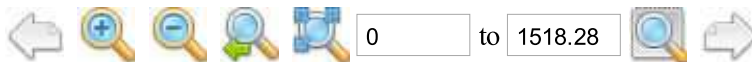

Label all possible matches  Label matches used for scoring

**Monoisotopic mass of neutral peptide Mr(calc):** 1621.7552

**Fixed modifications:** Carbamidomethyl (C) (apply to specified residues or termini only)

**Ions Score:** 72 **Expect:** 0.002

**Matches :** 23/68 fragment ions using 42 most intense peaks ([help](#))

| # | a        | a* | b               | b* | Seq.     | y                | y*               | #         |
|---|----------|----|-----------------|----|----------|------------------|------------------|-----------|
| 1 | 30.0338  |    | 58.0287         |    | <b>G</b> |                  |                  | <b>15</b> |
| 2 | 143.1179 |    | <b>171.1128</b> |    | <b>I</b> | 1565.7410        | 1548.7145        | <b>14</b> |
| 3 | 256.2020 |    | <b>284.1969</b> |    | <b>L</b> | 1452.6570        | 1435.6304        | <b>13</b> |
| 4 | 327.2391 |    | <b>355.2340</b> |    | <b>A</b> | <b>1339.5729</b> | 1322.5464        | <b>12</b> |
| 5 | 458.2796 |    | <b>486.2745</b> |    | <b>M</b> | <b>1268.5358</b> | 1251.5092        | <b>11</b> |
| 6 | 573.3065 |    | 601.3014        |    | <b>D</b> | <b>1137.4953</b> | <b>1120.4688</b> | <b>10</b> |
| 7 | 702.3491 |    | 730.3440        |    | <b>E</b> | <b>1022.4684</b> | 1005.4418        | <b>9</b>  |

|    |           |           |           |           |   |          |          |   |
|----|-----------|-----------|-----------|-----------|---|----------|----------|---|
| 8  | 789.3811  |           | 817.3760  |           | S | 893.4258 | 876.3992 | 8 |
| 9  | 903.4240  | 886.3975  | 931.4190  | 914.3924  | N | 806.3937 | 789.3672 | 7 |
| 10 | 974.4612  | 957.4346  | 1002.4561 | 985.4295  | A | 692.3508 | 675.3243 | 6 |
| 11 | 1075.5088 | 1058.4823 | 1103.5038 | 1086.4772 | T | 621.3137 | 604.2872 | 5 |
| 12 | 1235.5395 | 1218.5129 | 1263.5344 | 1246.5079 | C | 520.2660 | 503.2395 | 4 |
| 13 | 1292.5609 | 1275.5344 | 1320.5559 | 1303.5293 | G | 360.2354 | 343.2088 | 3 |
| 14 | 1420.6559 | 1403.6294 | 1448.6508 | 1431.6243 | K | 303.2139 | 286.1874 | 2 |
| 15 |           |           |           |           | R | 175.1190 | 158.0924 | 1 |

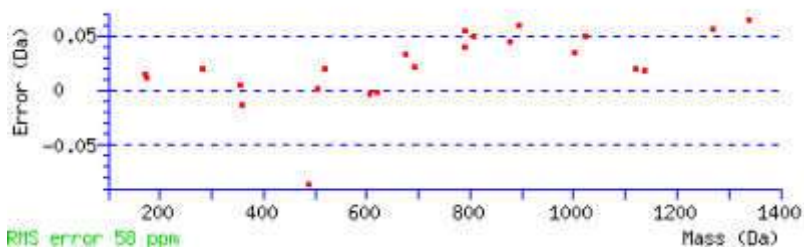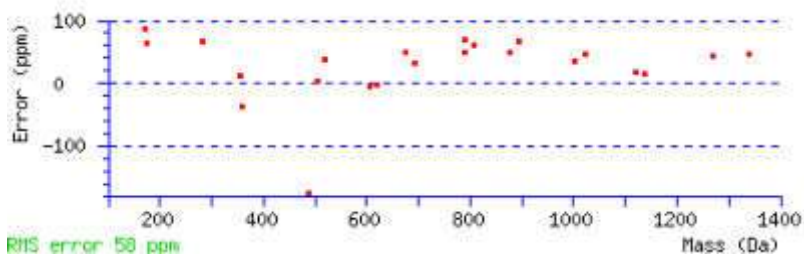

NCBI BLAST search of [GILAMDESNATCGKR](#)

(Parameters: blastp, nr protein database, expect=20000, no filter, PAM30)

Other BLAST [web gateways](#)

#### All matches to this query

| Score | Mr(calc)  | Delta   | Sequence                           |
|-------|-----------|---------|------------------------------------|
| 71.8  | 1621.7552 | 0.0567  | <a href="#">GILAMDESNATCGKR</a>    |
| 32.5  | 1621.7552 | 0.0567  | <a href="#">GLLAMDESNGTCAKR</a>    |
| 16.3  | 1621.8464 | -0.0345 | <a href="#">GLIFLGTSGDAATFPR</a>   |
| 15.5  | 1621.8134 | -0.0015 | <a href="#">TTYGPTAPSMISAAVR</a>   |
| 14.9  | 1621.8610 | -0.0491 | <a href="#">LVQFLESNRLMTR</a>      |
| 13.3  | 1621.9225 | -0.1106 | <a href="#">LNPLVEKITVPMR</a>      |
| 13.2  | 1621.8940 | -0.0821 | <a href="#">IGLFGLEKLHNPER</a>     |
| 13.0  | 1621.7738 | 0.0381  | <a href="#">ALAVMMSRGMSPPSR</a>    |
| 12.2  | 1621.7657 | 0.0463  | <a href="#">TGTVGTGGTGNNTTGGQR</a> |
| 12.2  | 1621.8172 | -0.0053 | <a href="#">LGLDVQAHSAGSAPSGR</a>  |

Mascot: <http://www.matrixscience.com/>



# Mascot Search Results

## Peptide View **Spot no 58**

MS/MS Fragmentation of **GLVPLAGSNNE SWCQLDGLASR**

Found in **gi108864048** in **NCBI nr**, Fructose-bisphosphate aldolase, chloroplast precursor, putative, expressed [Oryza sativa Japonica Group]

Match to Query 273: 2400.240524 from(2401.247800,1+) intensity(0.0000) index(32)

Title: Label: C7, Spot\_Id: 219772, Peak\_List\_Id: 226180, MSMS Job\_Run\_Id: 21836, Comment:

Data file C:\Documents and Settings\Administrator\Desktop\Farah-Garima 11May 2013\ppw\_C7\_136859909200.txt

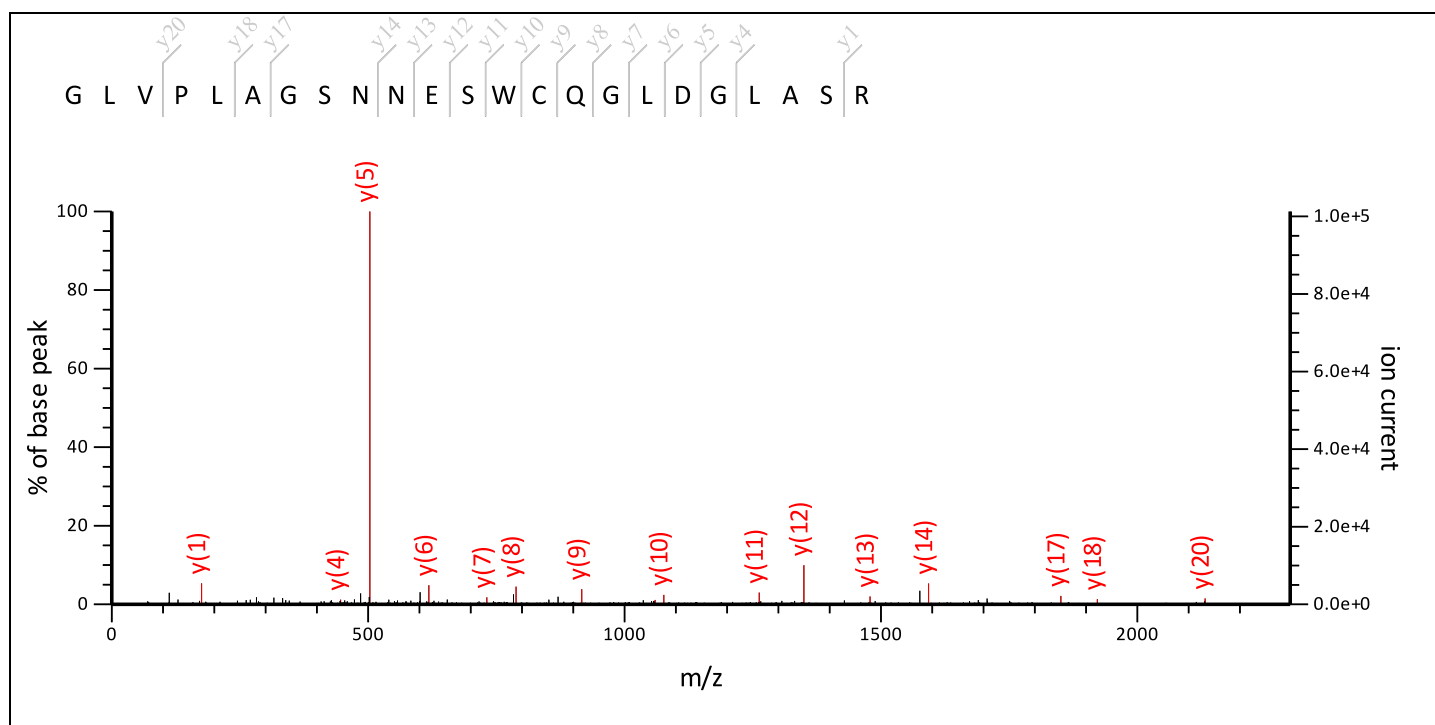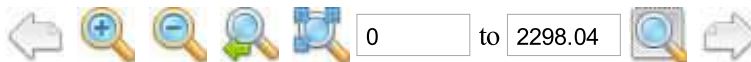

Label all possible matches  Label matches used for scoring

**Monoisotopic mass of neutral peptide Mr(calc):** 2400.1492

**Fixed modifications:** Carbamidomethyl (C) (apply to specified residues or termini only)

**Ions Score:** 132 **Expect:** 1.4e-09

**Matches:** 16/116 fragment ions using 22 most intense peaks ([help](#))

| # | a        | a* | b        | b* | Seq. | y         | y*        | #  |
|---|----------|----|----------|----|------|-----------|-----------|----|
| 1 | 30.0338  |    | 58.0287  |    | G    |           |           | 23 |
| 2 | 143.1179 |    | 171.1128 |    | L    | 2344.1350 | 2327.1085 | 22 |
| 3 | 242.1863 |    | 270.1812 |    | V    | 2231.0510 | 2214.0244 | 21 |
| 4 | 339.2391 |    | 367.2340 |    | P    | 2131.9825 | 2114.9560 | 20 |
| 5 | 452.3231 |    | 480.3180 |    | L    | 2034.9298 | 2017.9032 | 19 |
| 6 | 523.3602 |    | 551.3552 |    | A    | 1921.8457 | 1904.8192 | 18 |
| 7 | 580.3817 |    | 608.3766 |    | G    | 1850.8086 | 1833.7821 | 17 |

|    |           |           |           |           |   |           |           |    |
|----|-----------|-----------|-----------|-----------|---|-----------|-----------|----|
| 8  | 667.4137  |           | 695.4087  |           | S | 1793.7871 | 1776.7606 | 16 |
| 9  | 781.4567  | 764.4301  | 809.4516  | 792.4250  | N | 1706.7551 | 1689.7286 | 15 |
| 10 | 895.4996  | 878.4730  | 923.4945  | 906.4680  | N | 1592.7122 | 1575.6856 | 14 |
| 11 | 1024.5422 | 1007.5156 | 1052.5371 | 1035.5105 | E | 1478.6693 | 1461.6427 | 13 |
| 12 | 1111.5742 | 1094.5477 | 1139.5691 | 1122.5426 | S | 1349.6267 | 1332.6001 | 12 |
| 13 | 1297.6535 | 1280.6270 | 1325.6484 | 1308.6219 | W | 1262.5946 | 1245.5681 | 11 |
| 14 | 1457.6842 | 1440.6576 | 1485.6791 | 1468.6525 | C | 1076.5153 | 1059.4888 | 10 |
| 15 | 1585.7428 | 1568.7162 | 1613.7377 | 1596.7111 | Q | 916.4847  | 899.4581  | 9  |
| 16 | 1642.7642 | 1625.7377 | 1670.7591 | 1653.7326 | G | 788.4261  | 771.3995  | 8  |
| 17 | 1755.8483 | 1738.8217 | 1783.8432 | 1766.8166 | L | 731.4046  | 714.3781  | 7  |
| 18 | 1870.8752 | 1853.8487 | 1898.8701 | 1881.8436 | D | 618.3206  | 601.2940  | 6  |
| 19 | 1927.8967 | 1910.8701 | 1955.8916 | 1938.8651 | G | 503.2936  | 486.2671  | 5  |
| 20 | 2040.9808 | 2023.9542 | 2068.9757 | 2051.9491 | L | 446.2722  | 429.2456  | 4  |
| 21 | 2112.0179 | 2094.9913 | 2140.0128 | 2122.9862 | A | 333.1881  | 316.1615  | 3  |
| 22 | 2199.0499 | 2182.0233 | 2227.0448 | 2210.0183 | S | 262.1510  | 245.1244  | 2  |
| 23 |           |           |           |           | R | 175.1190  | 158.0924  | 1  |

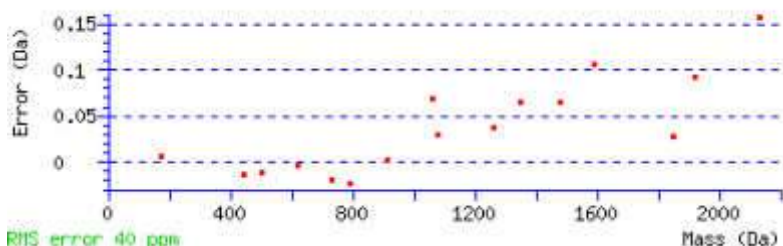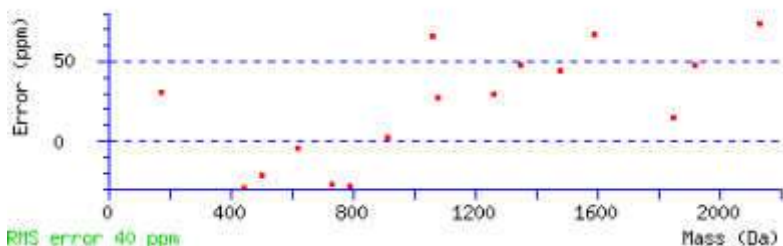

NCBI **BLAST** search of [GLVPLAGSNNESWCQGLDGLASR](#)  
 (Parameters: blastp, nr protein database, expect=20000, no filter, PAM30)  
 Other BLAST [web gateways](#)

**All matches to this query**

| Score | Mr(calc)  | Delta   | Sequence                                  |
|-------|-----------|---------|-------------------------------------------|
| 131.8 | 2400.1492 | 0.0913  | <a href="#">GLVPLAGSNNESWCQGLDGLASR</a>   |
| 17.6  | 2400.2649 | -0.0243 | <a href="#">NPRTGNIVAESFGTIILDENLK</a>    |
| 17.1  | 2400.1890 | 0.0515  | <a href="#">NVMVVELMVGGTGGRPGLDGVDGR</a>  |
| 17.1  | 2400.1890 | 0.0515  | <a href="#">NVMVVELMVGGTGGRPGLDGVDGR</a>  |
| 16.9  | 2400.1193 | 0.1212  | <a href="#">WASSAPATAVAEAEAEALGDGDGVR</a> |
| 12.8  | 2400.1961 | 0.0444  | <a href="#">RIDLYYGQFGENLTVEGLADK</a>     |
| 11.1  | 2400.1211 | 0.1194  | <a href="#">DSMCGFRVYPLAPCMAILQR</a>      |

|     |           |        |                                            |
|-----|-----------|--------|--------------------------------------------|
| 9.7 | 2400.1591 | 0.0814 | <a href="#">SSASVAQTMGTVSYYVVGALVGEOSR</a> |
| 9.3 | 2400.0990 | 0.1415 | <a href="#">GIQTMEAANAWAPSEMTAYNAR</a>     |
| 9.2 | 2400.0335 | 0.2070 | <a href="#">CDTPGCRPYAEEIANGSPHNR</a>      |

**Mascot:** <http://www.matrixscience.com/>

# MATRIX SCIENCE Mascot Search Results

## Peptide View **Spot no 58**

MS/MS Fragmentation of **VDKGLVPLAGSNNE SWCQLDGLASR**

Found in **gi|108864048** in **NCBI nr**, Fructose-bisphosphate aldolase, chloroplast precursor, putative, expressed [Oryza sativa Japonica Group]

Match to Query 279: 2742.446624 from(2743.453900,1+) intensity(0.0000) index(33)

Title: Label: C7, Spot\_Id: 219772, Peak\_List\_Id: 226210, MSMS Job\_Run\_Id: 21836, Comment:

Data file C:\Documents and Settings\Administrator\Desktop\Farah-Garima 11May 2013\ppw\_C7\_136859909200.txt

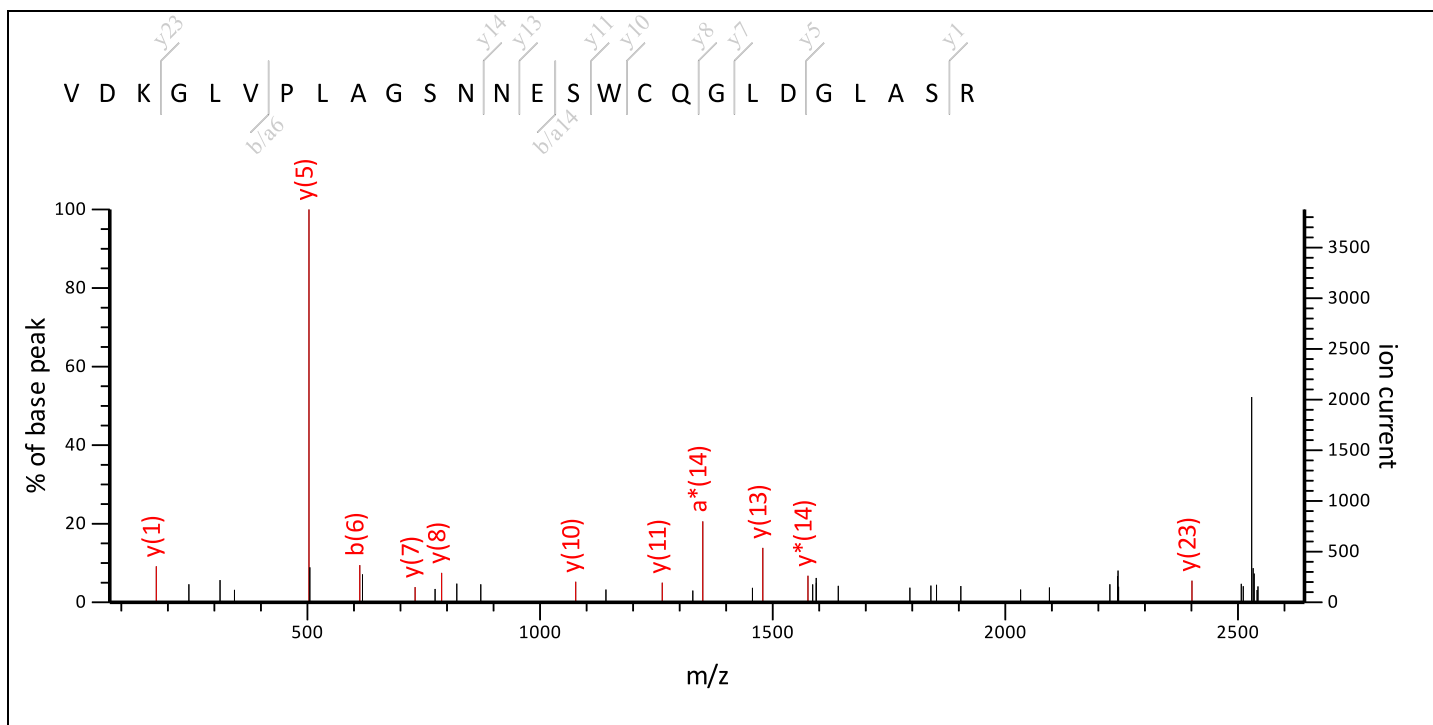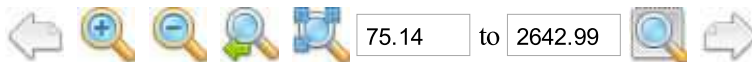

Label all possible matches  Label matches used for scoring

**Monoisotopic mass of neutral peptide Mr(calc):** 2742.3395

**Fixed modifications:** Carbamidomethyl (C) (apply to specified residues or termini only)

**Ions Score:** 50 **Expect:** 0.17

**Matches:** 12/146 fragment ions using 19 most intense peaks ([help](#))

| # | a        | a*       | b               | b*       | Seq. | y                | y*        | #  |
|---|----------|----------|-----------------|----------|------|------------------|-----------|----|
| 1 | 72.0808  |          | 100.0757        |          | V    |                  |           | 26 |
| 2 | 187.1077 |          | 215.1026        |          | D    | 2644.2784        | 2627.2518 | 25 |
| 3 | 315.2027 | 298.1761 | 343.1976        | 326.1710 | K    | 2529.2514        | 2512.2249 | 24 |
| 4 | 372.2241 | 355.1976 | 400.2191        | 383.1925 | G    | <b>2401.1565</b> | 2384.1299 | 23 |
| 5 | 485.3082 | 468.2817 | 513.3031        | 496.2766 | L    | 2344.1350        | 2327.1085 | 22 |
| 6 | 584.3766 | 567.3501 | <b>612.3715</b> | 595.3450 | V    | 2231.0510        | 2214.0244 | 21 |
| 7 | 681.4294 | 664.4028 | 709.4243        | 692.3978 | P    | 2131.9825        | 2114.9560 | 20 |



|    |           |           |           |           |   |           |           |    |
|----|-----------|-----------|-----------|-----------|---|-----------|-----------|----|
| 8  | 794.5135  | 777.4869  | 822.5084  | 805.4818  | L | 2034.9298 | 2017.9032 | 19 |
| 9  | 865.5506  | 848.5240  | 893.5455  | 876.5189  | A | 1921.8457 | 1904.8192 | 18 |
| 10 | 922.5720  | 905.5455  | 950.5669  | 933.5404  | G | 1850.8086 | 1833.7821 | 17 |
| 11 | 1009.6041 | 992.5775  | 1037.5990 | 1020.5724 | S | 1793.7871 | 1776.7606 | 16 |
| 12 | 1123.6470 | 1106.6204 | 1151.6419 | 1134.6154 | N | 1706.7551 | 1689.7286 | 15 |
| 13 | 1237.6899 | 1220.6634 | 1265.6848 | 1248.6583 | N | 1592.7122 | 1575.6856 | 14 |
| 14 | 1366.7325 | 1349.7060 | 1394.7274 | 1377.7009 | E | 1478.6693 | 1461.6427 | 13 |
| 15 | 1453.7645 | 1436.7380 | 1481.7594 | 1464.7329 | S | 1349.6267 | 1332.6001 | 12 |
| 16 | 1639.8438 | 1622.8173 | 1667.8388 | 1650.8122 | W | 1262.5946 | 1245.5681 | 11 |
| 17 | 1799.8745 | 1782.8479 | 1827.8694 | 1810.8429 | C | 1076.5153 | 1059.4888 | 10 |
| 18 | 1927.9331 | 1910.9065 | 1955.9280 | 1938.9014 | Q | 916.4847  | 899.4581  | 9  |
| 19 | 1984.9545 | 1967.9280 | 2012.9495 | 1995.9229 | G | 788.4261  | 771.3995  | 8  |
| 20 | 2098.0386 | 2081.0121 | 2126.0335 | 2109.0070 | L | 731.4046  | 714.3781  | 7  |
| 21 | 2213.0655 | 2196.0390 | 2241.0605 | 2224.0339 | D | 618.3206  | 601.2940  | 6  |
| 22 | 2270.0870 | 2253.0605 | 2298.0819 | 2281.0554 | G | 503.2936  | 486.2671  | 5  |
| 23 | 2383.1711 | 2366.1445 | 2411.1660 | 2394.1394 | L | 446.2722  | 429.2456  | 4  |
| 24 | 2454.2082 | 2437.1816 | 2482.2031 | 2465.1766 | A | 333.1881  | 316.1615  | 3  |
| 25 | 2541.2402 | 2524.2137 | 2569.2351 | 2552.2086 | S | 262.1510  | 245.1244  | 2  |
| 26 |           |           |           |           | R | 175.1190  | 158.0924  | 1  |

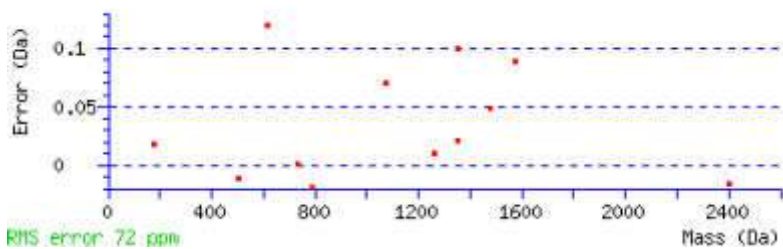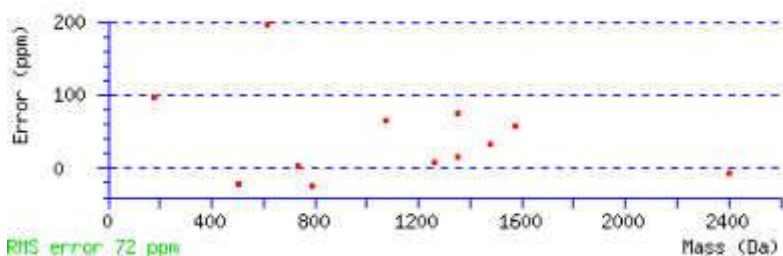

NCBI **BLAST** search of [VDKGLVPLAGSNNESWCQGLDGLASR](#)  
 (Parameters: blastp, nr protein database, expect=20000, no filter, PAM30)  
 Other BLAST [web gateways](#)

#### All matches to this query

| Score | Mr(calc)  | Delta  | Sequence                                    |
|-------|-----------|--------|---------------------------------------------|
| 50.0  | 2742.3395 | 0.1071 | <a href="#">VDKGLVPLAGSNNESWCQGLDGLASR</a>  |
| 11.8  | 2742.3622 | 0.0844 | <a href="#">AFVVNIGDTEFALTNGIYKSCCLR</a>    |
| 10.0  | 2742.4262 | 0.0204 | <a href="#">LVLTDHDMAPITASVTALFIDVATGR</a>  |
| 9.4   | 2742.3759 | 0.0707 | <a href="#">GOPVAPGLPPVDEHMAASSNSTPSLKR</a> |

|     |           |        |                                           |
|-----|-----------|--------|-------------------------------------------|
| 9.3 | 2742.2551 | 0.1916 | <a href="#">TGYPVEMLEPGMGMSDLGIDSIKR</a>  |
| 9.0 | 2742.3422 | 0.1044 | <a href="#">FEPETTGTTIMAVIYDGGLIGADSR</a> |
| 9.0 | 2742.3422 | 0.1044 | <a href="#">FEPETTGTTIMAVIYDGGLIGADSR</a> |
| 8.8 | 2742.2290 | 0.2176 | <a href="#">DLNVGDPNDPETDVGPMISEEEAKR</a> |
| 8.2 | 2742.3383 | 0.1083 | <a href="#">MPAPRTLHLNAFLMNAGHHDAAWR</a>  |
| 7.6 | 2742.3978 | 0.0488 | <a href="#">DYPFVKIMDNLEWYLALILNEK</a>    |

**Mascot:** <http://www.matrixscience.com/>



# Mascot Search Results

## Peptide View **Spot no 58**

MS/MS Fragmentation of **YAAISQDNLVPIVEPEILLDGEHGI DR**

Found in **gi|108864048** in **NCBI nr**, Fructose-bisphosphate aldolase, chloroplast precursor, putative, expressed [Oryza sativa Japonica Group]

Match to Query 281: 3032.674824 from(3033.682100,1+) intensity(0.0000) index(34)

Title: Label: C7, Spot\_Id: 219772, Peak\_List\_Id: 226185, MSMS Job\_Run\_Id: 21836, Comment:

Data file C:\Documents and Settings\Administrator\Desktop\Farah-Garima 11May 2013\ppw\_C7\_136859909200.txt

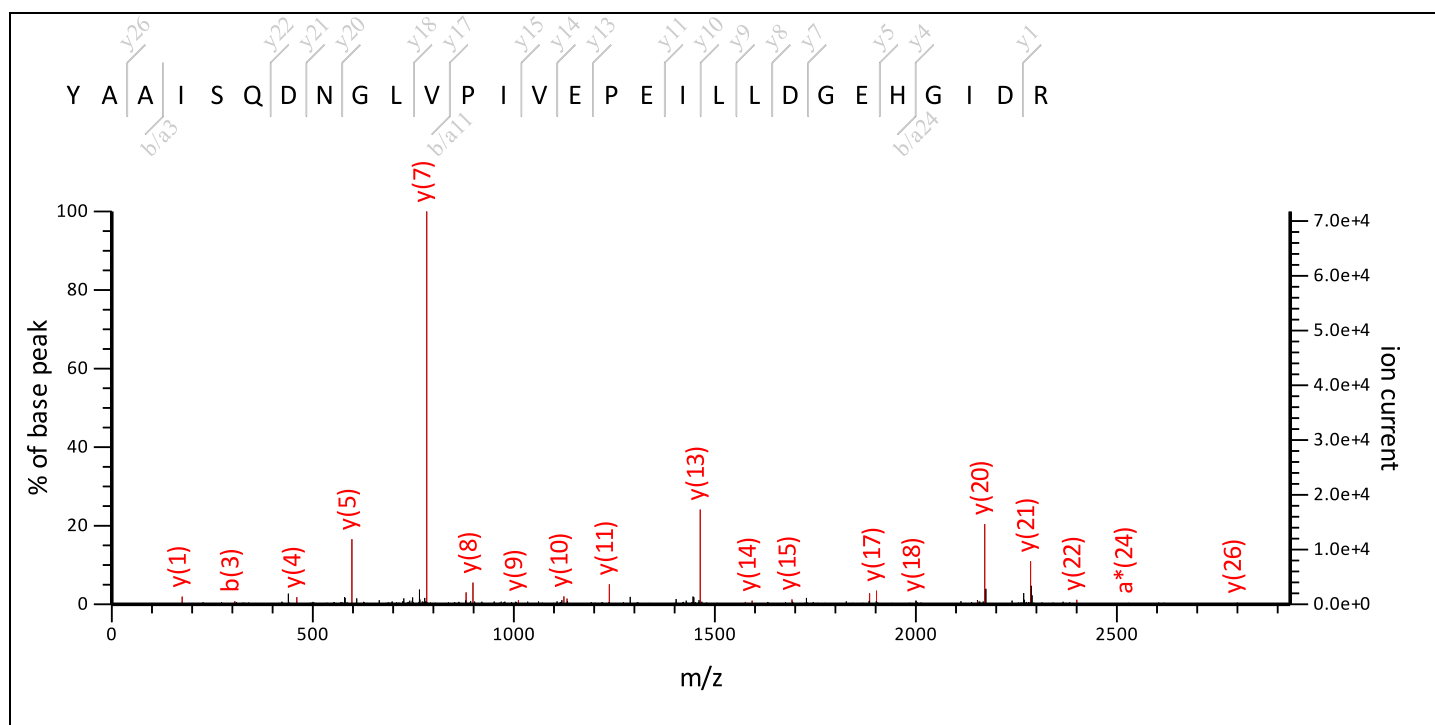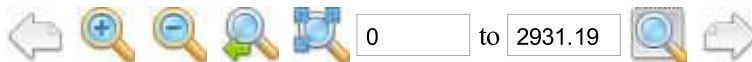

Label all possible matches  Label matches used for scoring

**Monoisotopic mass of neutral peptide Mr(calc):** 3032.5455

**Fixed modifications:** Carbamidomethyl (C) (apply to specified residues or termini only)

**Ions Score:** 91 **Expect:** 1e-05

**Matches:** 24/152 fragment ions using 56 most intense peaks ([help](#))

| # | a        | a*       | b               | b*       | Seq. | y                | y*        | #  |
|---|----------|----------|-----------------|----------|------|------------------|-----------|----|
| 1 | 136.0757 |          | 164.0706        |          | Y    |                  |           | 28 |
| 2 | 207.1128 |          | 235.1077        |          | A    | 2870.4894        | 2853.4629 | 27 |
| 3 | 278.1499 |          | <b>306.1448</b> |          | A    | <b>2799.4523</b> | 2782.4258 | 26 |
| 4 | 391.2340 |          | 419.2289        |          | I    | 2728.4152        | 2711.3887 | 25 |
| 5 | 478.2660 |          | 506.2609        |          | S    | 2615.3311        | 2598.3046 | 24 |
| 6 | 606.3246 | 589.2980 | 634.3195        | 617.2930 | Q    | 2528.2991        | 2511.2726 | 23 |
| 7 | 721.3515 | 704.3250 | 749.3464        | 732.3199 | D    | <b>2400.2405</b> | 2383.2140 | 22 |

|    |           |                  |                  |           |   |                  |                  |    |
|----|-----------|------------------|------------------|-----------|---|------------------|------------------|----|
| 8  | 835.3945  | 818.3679         | 863.3894         | 846.3628  | N | <b>2285.2136</b> | 2268.1870        | 21 |
| 9  | 892.4159  | 875.3894         | 920.4108         | 903.3843  | G | <b>2171.1707</b> | 2154.1441        | 20 |
| 10 | 1005.5000 | 988.4734         | 1033.4949        | 1016.4684 | L | 2114.1492        | 2097.1226        | 19 |
| 11 | 1104.5684 | 1087.5419        | <b>1132.5633</b> | 1115.5368 | V | <b>2001.0651</b> | 1984.0386        | 18 |
| 12 | 1201.6212 | 1184.5946        | 1229.6161        | 1212.5895 | P | <b>1901.9967</b> | <b>1884.9702</b> | 17 |
| 13 | 1314.7052 | 1297.6787        | 1342.7001        | 1325.6736 | I | 1804.9440        | 1787.9174        | 16 |
| 14 | 1413.7736 | 1396.7471        | 1441.7686        | 1424.7420 | V | <b>1691.8599</b> | 1674.8333        | 15 |
| 15 | 1542.8162 | 1525.7897        | 1570.8112        | 1553.7846 | E | <b>1592.7915</b> | <b>1575.7649</b> | 14 |
| 16 | 1639.8690 | 1622.8425        | 1667.8639        | 1650.8374 | P | <b>1463.7489</b> | 1446.7223        | 13 |
| 17 | 1768.9116 | 1751.8850        | 1796.9065        | 1779.8800 | E | 1366.6961        | 1349.6696        | 12 |
| 18 | 1881.9957 | 1864.9691        | 1909.9906        | 1892.9640 | I | <b>1237.6535</b> | 1220.6270        | 11 |
| 19 | 1995.0797 | 1978.0532        | 2023.0746        | 2006.0481 | L | <b>1124.5695</b> | 1107.5429        | 10 |
| 20 | 2108.1638 | 2091.1372        | 2136.1587        | 2119.1321 | L | <b>1011.4854</b> | 994.4588         | 9  |
| 21 | 2223.1907 | 2206.1642        | 2251.1856        | 2234.1591 | D | <b>898.4013</b>  | <b>881.3748</b>  | 8  |
| 22 | 2280.2122 | 2263.1856        | 2308.2071        | 2291.1806 | G | <b>783.3744</b>  | 766.3478         | 7  |
| 23 | 2409.2548 | 2392.2282        | 2437.2497        | 2420.2231 | E | 726.3529         | 709.3264         | 6  |
| 24 | 2546.3137 | <b>2529.2871</b> | 2574.3086        | 2557.2821 | H | <b>597.3103</b>  | 580.2838         | 5  |
| 25 | 2603.3352 | 2586.3086        | 2631.3301        | 2614.3035 | G | <b>460.2514</b>  | 443.2249         | 4  |
| 26 | 2716.4192 | 2699.3927        | 2744.4141        | 2727.3876 | I | 403.2300         | 386.2034         | 3  |
| 27 | 2831.4462 | 2814.4196        | 2859.4411        | 2842.4145 | D | 290.1459         | 273.1193         | 2  |
| 28 |           |                  |                  |           | R | <b>175.1190</b>  | 158.0924         | 1  |

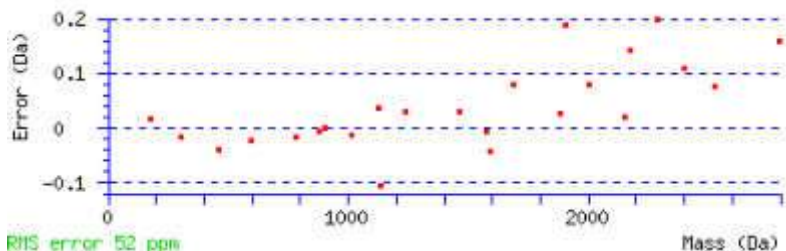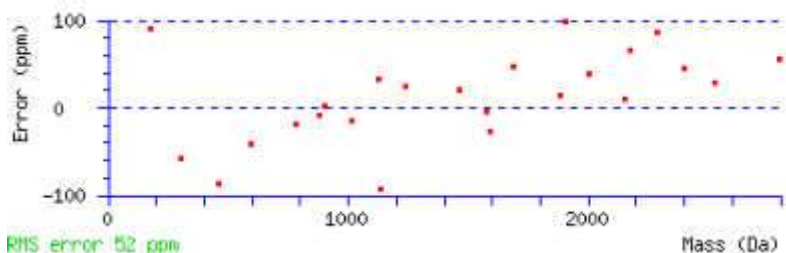

NCBI **BLAST** search of [YAAISQDNGLVPIVEPEILLDGEHGIDR](#)  
 (Parameters: blastp, nr protein database, expect=20000, no filter, PAM30)  
 Other BLAST [web gateways](#)

#### All matches to this query

| Score | Mr(calc)  | Delta  | Sequence                                     |
|-------|-----------|--------|----------------------------------------------|
| 91.1  | 3032.5455 | 0.1294 | <a href="#">YAAISQDNGLVPIVEPEILLDGEHGIDR</a> |
| 74.2  | 3032.5455 | 0.1294 | <a href="#">YAAISQDNGLVPIVEPEILLDGDHGIER</a> |

|      |           |         |                                                 |
|------|-----------|---------|-------------------------------------------------|
| 19.4 | 3032.6290 | 0.0458  | <a href="#">GACDVVEDLAKPMPSLLILDILGLPLDR</a>    |
| 6.4  | 3032.5502 | 0.1246  | <a href="#">LGGTARAYYASGGATGVALDGLLDLHQMVR</a>  |
| 5.9  | 3032.9531 | -0.2783 | <a href="#">TNPLNPLVILGILLVIPMILLAVLLLVR</a>    |
| 5.8  | 3032.4735 | 0.2013  | <a href="#">LQNKIVSDIIQEYAHEPLMWDTMAR</a>       |
| 5.5  | 3032.4590 | 0.2159  | <a href="#">FASMSGGETAQPLADYYVQQWKEIGLK</a>     |
| 5.0  | 3032.5825 | 0.0923  | <a href="#">GIATEVIVATISPADAQAHLRNGLAMGANR</a>  |
| 4.9  | 3032.4558 | 0.2190  | <a href="#">MGFLEDFQASVEALPAMLQRNYSLMR</a>      |
| 4.7  | 3032.4410 | 0.2338  | <a href="#">MTTPPHAAGTPPPGDAAGRASPPDSEPTPPR</a> |

**Mascot:** <http://www.matrixscience.com/>



# Mascot Search Results

## Peptide View **Spot no 60**

MS/MS Fragmentation of **MELVDAAFLLK**

Found in **gi15982948** in **NCBI**nr, NAD-dependent malate dehydrogenase [Prunus persica]

Match to Query 159: 1345.749924 from(1346.757200,1+) intensity(0.0000) index(15)

Title: Label: E10, Spot\_Id: 219822, Peak\_List\_Id: 226724, MSMS Job\_Run\_Id: 21854, Comment:

Data file C:\Documents and Settings\Administrator\Desktop\Farah-Garima 11May 2013\ppw\_E10\_136859948400.txt

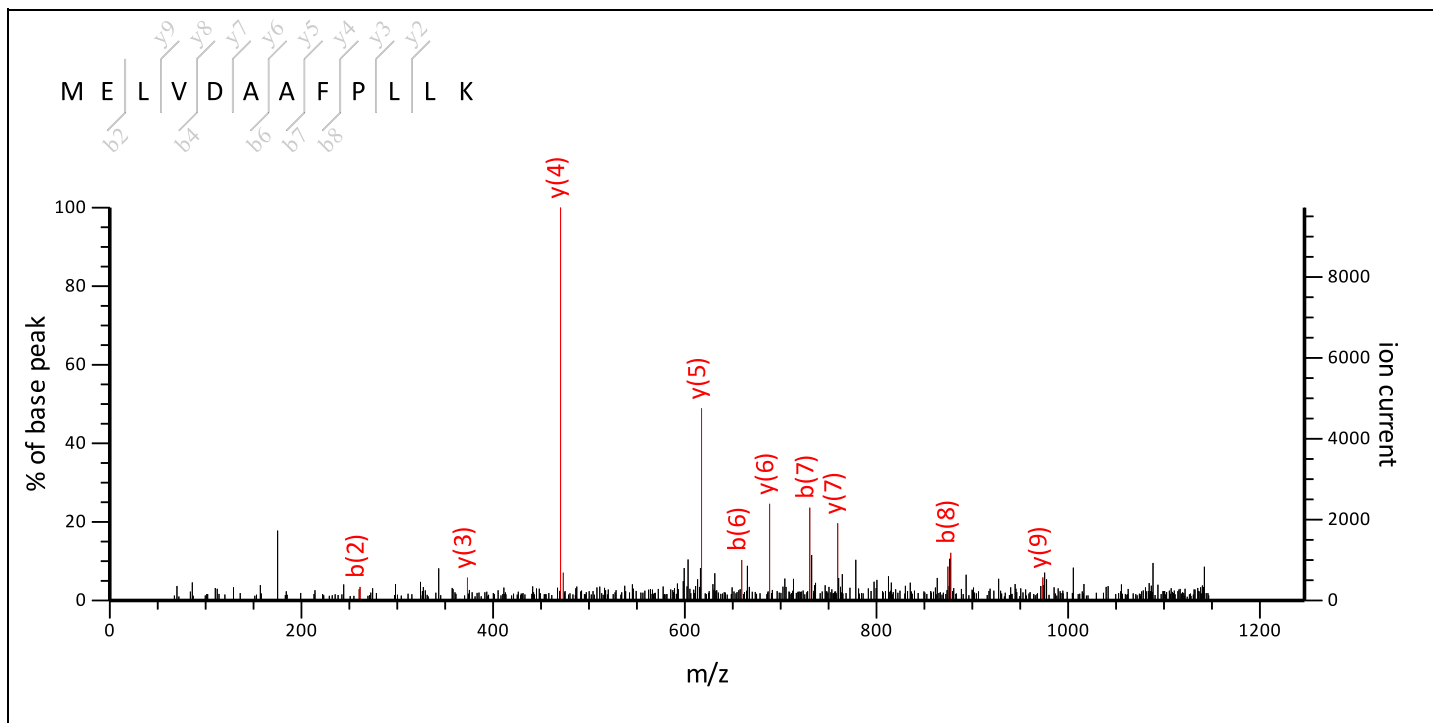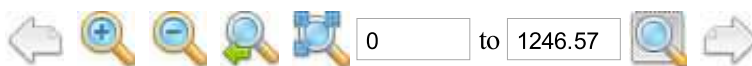

Label all possible matches  Label matches used for scoring

**Monoisotopic mass of neutral peptide Mr(calc):** 1345.7315

**Fixed modifications:** Carbamidomethyl (C) (apply to specified residues or termini only)

**Ions Score:** 30 **Expect:** 37

**Matches :** 13/44 fragment ions using 44 most intense peaks ([help](#))

| # | a        | b        | Seq. | y         | y*        | #  |
|---|----------|----------|------|-----------|-----------|----|
| 1 | 104.0528 | 132.0478 | M    |           |           | 12 |
| 2 | 233.0954 | 261.0904 | E    | 1215.6984 | 1198.6718 | 11 |
| 3 | 346.1795 | 374.1744 | L    | 1086.6558 | 1069.6292 | 10 |
| 4 | 445.2479 | 473.2428 | V    | 973.5717  | 956.5451  | 9  |
| 5 | 560.2749 | 588.2698 | D    | 874.5033  | 857.4767  | 8  |
| 6 | 631.3120 | 659.3069 | A    | 759.4763  | 742.4498  | 7  |
| 7 | 702.3491 | 730.3440 | A    | 688.4392  | 671.4127  | 6  |
| 8 | 849.4175 | 877.4124 | F    | 617.4021  | 600.3756  | 5  |

|    |           |           |   |          |          |   |
|----|-----------|-----------|---|----------|----------|---|
| 9  | 946.4703  | 974.4652  | P | 470.3337 | 453.3071 | 4 |
| 10 | 1059.5543 | 1087.5492 | L | 373.2809 | 356.2544 | 3 |
| 11 | 1172.6384 | 1200.6333 | L | 260.1969 | 243.1703 | 2 |
| 12 |           |           | K | 147.1128 | 130.0863 | 1 |

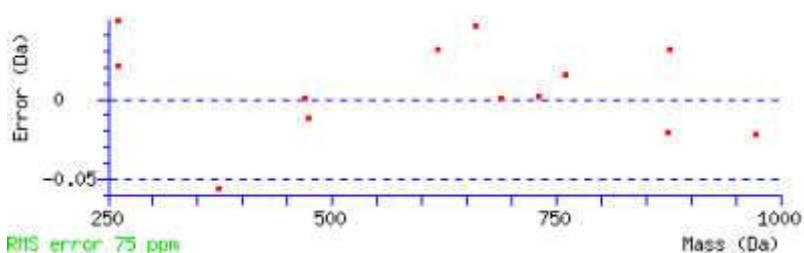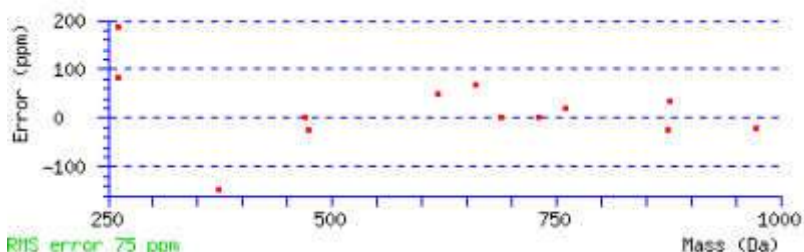

NCBI BLAST search of [MELVDAAFPLK](#)

(Parameters: blastp, nr protein database, expect=20000, no filter, PAM30)

Other BLAST [web gateways](#)

#### All matches to this query

| Score | Mr(calc)  | Delta   | Sequence                      |
|-------|-----------|---------|-------------------------------|
| 29.6  | 1345.7315 | 0.0184  | <a href="#">MELVDAAFPLK</a>   |
| 19.9  | 1345.7354 | 0.0145  | <a href="#">IEGAVVFITGANR</a> |
| 19.5  | 1345.7969 | -0.0470 | <a href="#">LASLIFLQLSNK</a>  |
| 17.9  | 1345.7354 | 0.0146  | <a href="#">LVEQFALKENR</a>   |
| 17.9  | 1345.7136 | 0.0363  | <a href="#">ILRSMATAGSAPR</a> |
| 17.9  | 1345.8373 | -0.0874 | <a href="#">EVLKFFLPILK</a>   |
| 17.8  | 1345.6772 | 0.0727  | <a href="#">EIVQMAREAGAR</a>  |
| 17.8  | 1345.6626 | 0.0873  | <a href="#">GNSGGPVVDELFR</a> |
| 17.2  | 1345.7103 | 0.0397  | <a href="#">VRDVFAADQVAR</a>  |
| 17.1  | 1345.6738 | 0.0761  | <a href="#">RSEPLFQOGER</a>   |

Mascot: <http://www.matrixscience.com/>





# Mascot Search Results

## Peptide View **Spot no 60**

MS/MS Fragmentation of **VLVVANPANTNALILK**

Found in **gi|15982948** in **NCBI**nr, NAD-dependent malate dehydrogenase [*Prunus persica*]

Match to Query 207: 1649.011524 from(1650.018800,1+) intensity(0.0000) index(19)

Title: Label: E10, Spot\_Id: 219822, Peak\_List\_Id: 226722, MSMS Job\_Run\_Id: 21854, Comment:

Data file C:\Documents and Settings\Administrator\Desktop\Farah-Garima 11May 2013\ppw\_E10\_136859948400.txt

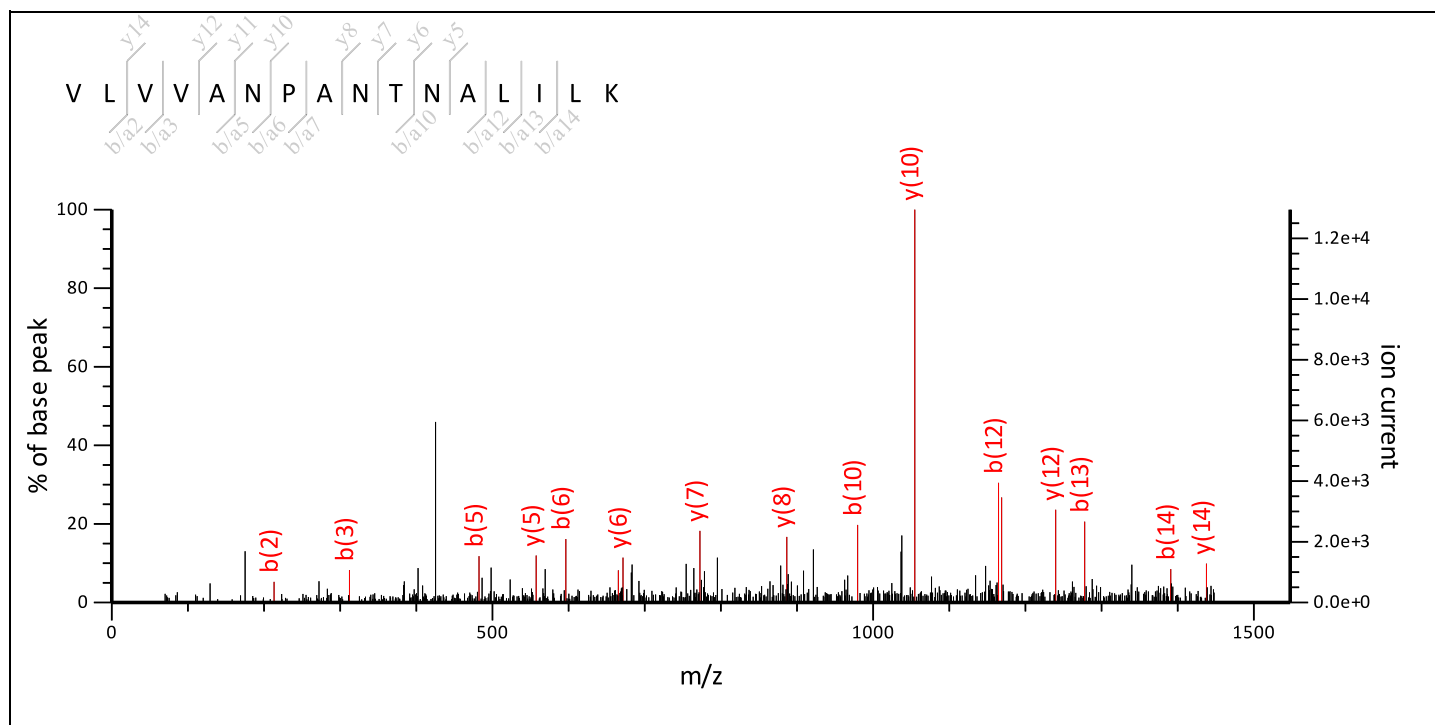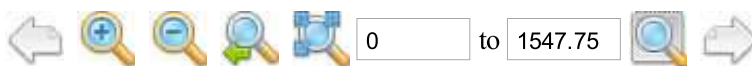

Label all possible matches  Label matches used for scoring

**Monoisotopic mass of neutral peptide Mr(calc):** 1648.9876

**Fixed modifications:** Carbamidomethyl (C) (apply to specified residues or termini only)

**Ions Score:** 65 **Expect:** 0.0045

**Matches:** 17/80 fragment ions using 28 most intense peaks ([help](#))

| # | a               | a*       | b               | b*       | Seq. | y                | y*        | #  |
|---|-----------------|----------|-----------------|----------|------|------------------|-----------|----|
| 1 | 72.0808         |          | 100.0757        |          | V    |                  |           | 16 |
| 2 | 185.1648        |          | <b>213.1598</b> |          | L    | 1550.9265        | 1533.8999 | 15 |
| 3 | 284.2333        |          | <b>312.2282</b> |          | V    | <b>1437.8424</b> | 1420.8158 | 14 |
| 4 | 383.3017        |          | 411.2966        |          | V    | 1338.7740        | 1321.7474 | 13 |
| 5 | 454.3388        |          | <b>482.3337</b> |          | A    | <b>1239.7056</b> | 1222.6790 | 12 |
| 6 | 568.3817        | 551.3552 | <b>596.3766</b> | 579.3501 | N    | <b>1168.6684</b> | 1151.6419 | 11 |
| 7 | <b>665.4345</b> | 648.4079 | 693.4294        | 676.4028 | P    | <b>1054.6255</b> | 1037.5990 | 10 |
| 8 | 736.4716        | 719.4450 | 764.4665        | 747.4400 | A    | 957.5728         | 940.5462  | 9  |

|    |           |           |                  |           |   |                 |          |   |
|----|-----------|-----------|------------------|-----------|---|-----------------|----------|---|
| 9  | 850.5145  | 833.4880  | 878.5094         | 861.4829  | N | <b>886.5356</b> | 869.5091 | 8 |
| 10 | 951.5622  | 934.5356  | <b>979.5571</b>  | 962.5306  | T | <b>772.4927</b> | 755.4662 | 7 |
| 11 | 1065.6051 | 1048.5786 | 1093.6000        | 1076.5735 | N | <b>671.4450</b> | 654.4185 | 6 |
| 12 | 1136.6422 | 1119.6157 | <b>1164.6371</b> | 1147.6106 | A | <b>557.4021</b> | 540.3756 | 5 |
| 13 | 1249.7263 | 1232.6997 | <b>1277.7212</b> | 1260.6947 | L | 486.3650        | 469.3384 | 4 |
| 14 | 1362.8104 | 1345.7838 | <b>1390.8053</b> | 1373.7787 | I | 373.2809        | 356.2544 | 3 |
| 15 | 1475.8944 | 1458.8679 | 1503.8893        | 1486.8628 | L | 260.1969        | 243.1703 | 2 |
| 16 |           |           |                  |           | K | 147.1128        | 130.0863 | 1 |

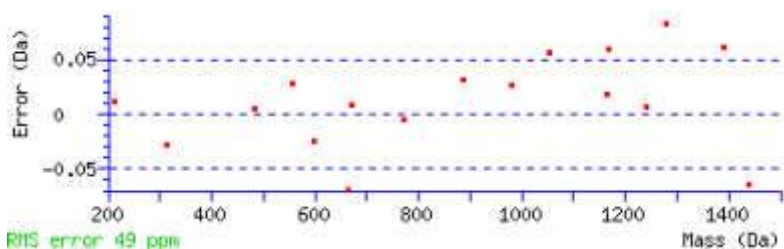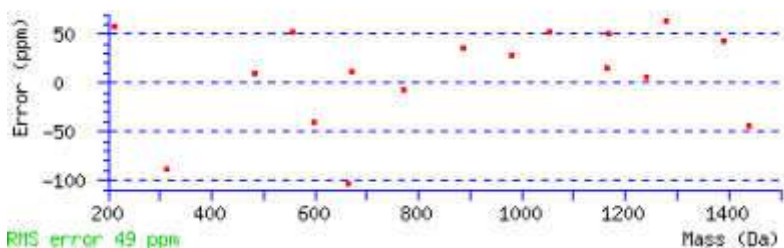

NCBI **BLAST** search of [VLVVANPANTNALILK](#)

(Parameters: blastp, nr protein database, expect=20000, no filter, PAM30)

Other BLAST [web gateways](#)

#### All matches to this query

| Score | Mr(calc)  | Delta   | Sequence                          |
|-------|-----------|---------|-----------------------------------|
| 64.6  | 1648.9876 | 0.0240  | <a href="#">VLVVANPANTNALILK</a>  |
| 17.9  | 1648.9875 | 0.0240  | <a href="#">EKDLQQLILLPAIR</a>    |
| 17.2  | 1648.9121 | 0.0994  | <a href="#">LTGAALRTAQANGLHR</a>  |
| 16.8  | 1649.0240 | -0.0124 | <a href="#">LTGPLNLLVLLTGIGR</a>  |
| 16.4  | 1648.9413 | 0.0702  | <a href="#">LVRIDLLIESWHR</a>     |
| 14.8  | 1648.9624 | 0.0491  | <a href="#">LVLTAAGQTLLSHAVR</a>  |
| 14.6  | 1648.9736 | 0.0379  | <a href="#">STLALGLALSAARLHR</a>  |
| 14.4  | 1648.9261 | 0.0855  | <a href="#">KDITVPVTISNHLGR</a>   |
| 14.3  | 1648.8494 | 0.1621  | <a href="#">VDASIMFNLIEELR</a>    |
| 13.5  | 1648.8896 | 0.1219  | <a href="#">VLVVGSGAAEAAEALHR</a> |

Mascot: <http://www.matrixscience.com/>

# MATRIX SCIENCE Mascot Search Results

## Peptide View **Spot no 60**

MS/MS Fragmentation of **EFAPSIPEKNITCLR**

Found in **gi|15982948** in **NCBI**nr, NAD-dependent malate dehydrogenase [*Prunus persica*]

Match to Query 242: 1875.006224 from(1876.013500,1+) intensity(0.0000) index(23)

Title: Label: E10, Spot\_Id: 219822, Peak\_List\_Id: 226718, MSMS Job\_Run\_Id: 21854, Comment:

Data file C:\Documents and Settings\Administrator\Desktop\Farah-Garima 11May 2013\ppw\_E10\_136859948400.txt

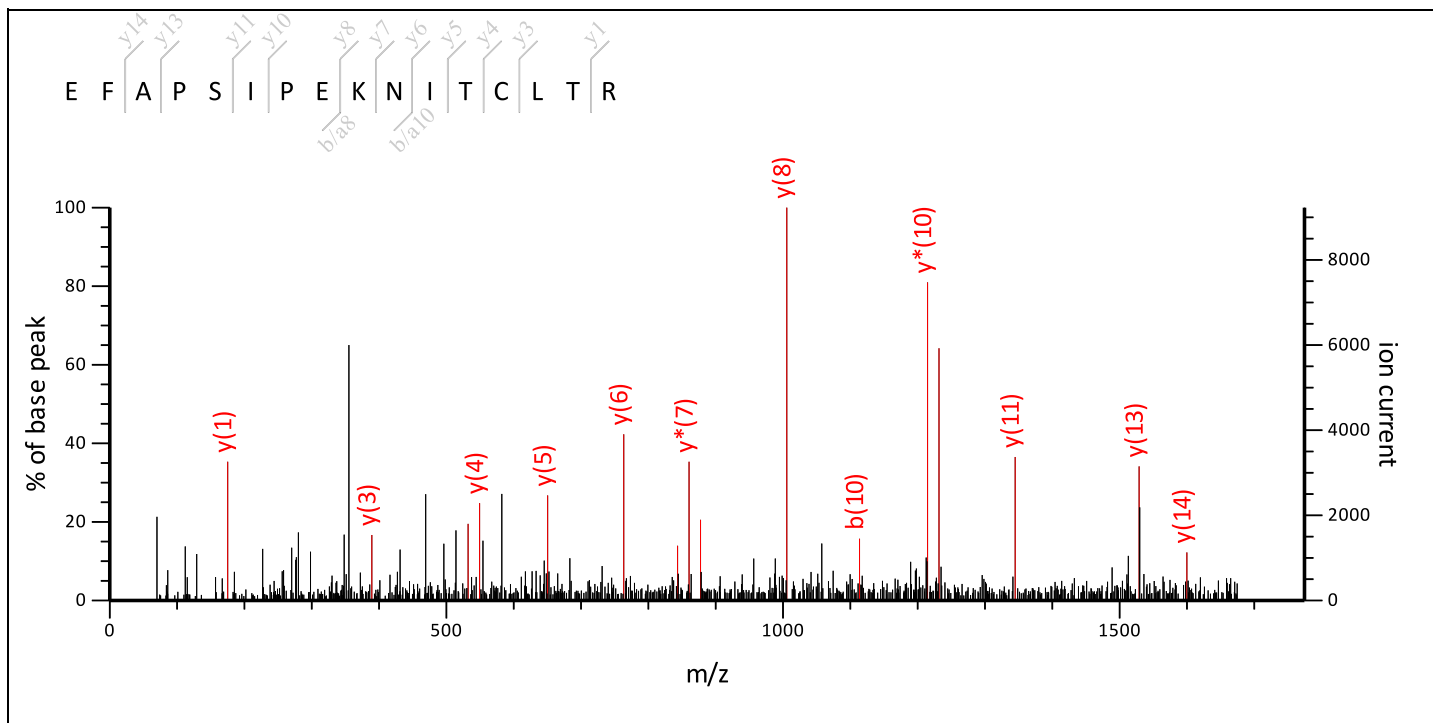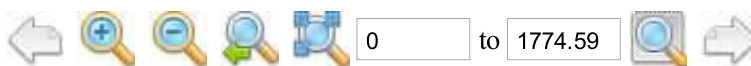

Label all possible matches  Label matches used for scoring

**Monoisotopic mass of neutral peptide Mr(calc):** 1874.9560

**Fixed modifications:** Carbamidomethyl (C) (apply to specified residues or termini only)

**Ions Score:** 63 **Expect:** 0.013

**Matches :** 17/74 fragment ions using 34 most intense peaks ([help](#))

| # | a        | a* | b        | b* | Seq. | y         | y*        | #  |
|---|----------|----|----------|----|------|-----------|-----------|----|
| 1 | 102.0550 |    | 130.0499 |    | E    |           |           | 16 |
| 2 | 249.1234 |    | 277.1183 |    | F    | 1746.9207 | 1729.8942 | 15 |
| 3 | 320.1605 |    | 348.1554 |    | A    | 1599.8523 | 1582.8258 | 14 |
| 4 | 417.2132 |    | 445.2082 |    | P    | 1528.8152 | 1511.7886 | 13 |
| 5 | 504.2453 |    | 532.2402 |    | S    | 1431.7624 | 1414.7359 | 12 |
| 6 | 617.3293 |    | 645.3243 |    | I    | 1344.7304 | 1327.7038 | 11 |
| 7 | 714.3821 |    | 742.3770 |    | P    | 1231.6463 | 1214.6198 | 10 |
| 8 | 843.4247 |    | 871.4196 |    | E    | 1134.5936 | 1117.5670 | 9  |

|    |           |           |                  |           |   |                  |                 |   |
|----|-----------|-----------|------------------|-----------|---|------------------|-----------------|---|
| 9  | 971.5197  | 954.4931  | 999.5146         | 982.4880  | K | <b>1005.5510</b> | 988.5244        | 8 |
| 10 | 1085.5626 | 1068.5360 | <b>1113.5575</b> | 1096.5310 | N | <b>877.4560</b>  | <b>860.4295</b> | 7 |
| 11 | 1198.6466 | 1181.6201 | 1226.6416        | 1209.6150 | I | <b>763.4131</b>  | 746.3865        | 6 |
| 12 | 1299.6943 | 1282.6678 | 1327.6892        | 1310.6627 | T | <b>650.3290</b>  | 633.3025        | 5 |
| 13 | 1459.7250 | 1442.6984 | 1487.7199        | 1470.6933 | C | <b>549.2813</b>  | <b>532.2548</b> | 4 |
| 14 | 1572.8090 | 1555.7825 | 1600.8040        | 1583.7774 | L | <b>389.2507</b>  | 372.2241        | 3 |
| 15 | 1673.8567 | 1656.8302 | 1701.8516        | 1684.8251 | T | 276.1666         | 259.1401        | 2 |
| 16 |           |           |                  |           | R | <b>175.1190</b>  | 158.0924        | 1 |

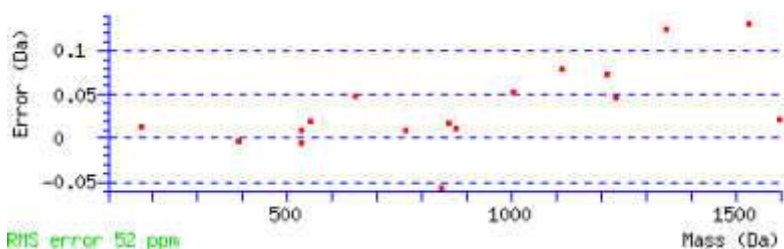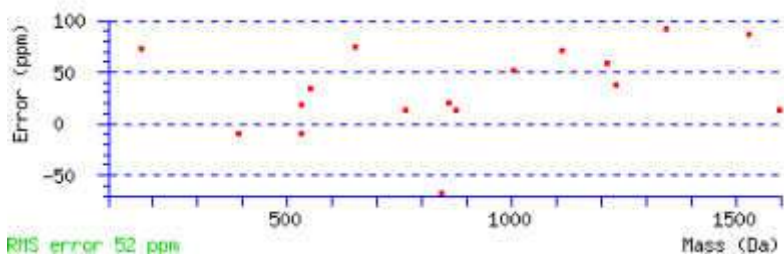

NCBI BLAST search of [EFAPSIPEKNITCLTR](#)

(Parameters: blastp, nr protein database, expect=20000, no filter, PAM30)

Other BLAST [web gateways](#)

#### All matches to this query

| Score | Mr(calc)  | Delta  | Sequence                           |
|-------|-----------|--------|------------------------------------|
| 63.2  | 1874.9560 | 0.0502 | <a href="#">EFAPSIPEKNITCLTR</a>   |
| 25.1  | 1874.9309 | 0.0753 | <a href="#">EFAPSIIPDRNVTCLTR</a>  |
| 16.5  | 1874.9117 | 0.0945 | <a href="#">MSESPLLILEQAMEER</a>   |
| 15.4  | 1874.9958 | 0.0105 | <a href="#">MSDMVNINKLILVTER</a>   |
| 13.4  | 1874.8330 | 0.1732 | <a href="#">VPWNDVCOQSTGGSGQR</a>  |
| 13.1  | 1874.9962 | 0.0100 | <a href="#">TAEAARGTLQNGLTVAER</a> |
| 11.2  | 1874.9407 | 0.0655 | <a href="#">LENAEISNIEITCTIR</a>   |
| 10.4  | 1874.9295 | 0.0767 | <a href="#">MSEPSAESTLLLEIAR</a>   |
| 10.1  | 1874.8985 | 0.1077 | <a href="#">MSVYFNEGANTKYVPR</a>   |
| 9.9   | 1874.9519 | 0.0543 | <a href="#">ALMKANEILETQSSNAR</a>  |

Mascot: <http://www.matrixscience.com/>

# MATRIX SCIENCE Mascot Search Results

## Peptide View Spot no 60

MS/MS Fragmentation of **VLVTGAAGQIGYALVPMIAR**

Found in **gi|15982948** in **NCBI**nr, NAD-dependent malate dehydrogenase [*Prunus persica*]

Match to Query 254: 1999.182624 from(2000.189900,1+) intensity(0.0000) index(25)

Title: Label: E10, Spot\_Id: 219822, Peak\_List\_Id: 226717, MSMS Job\_Run\_Id: 21854, Comment:

Data file C:\Documents and Settings\Administrator\Desktop\Farah-Garima 11May 2013\ppw\_E10\_136859948400.txt

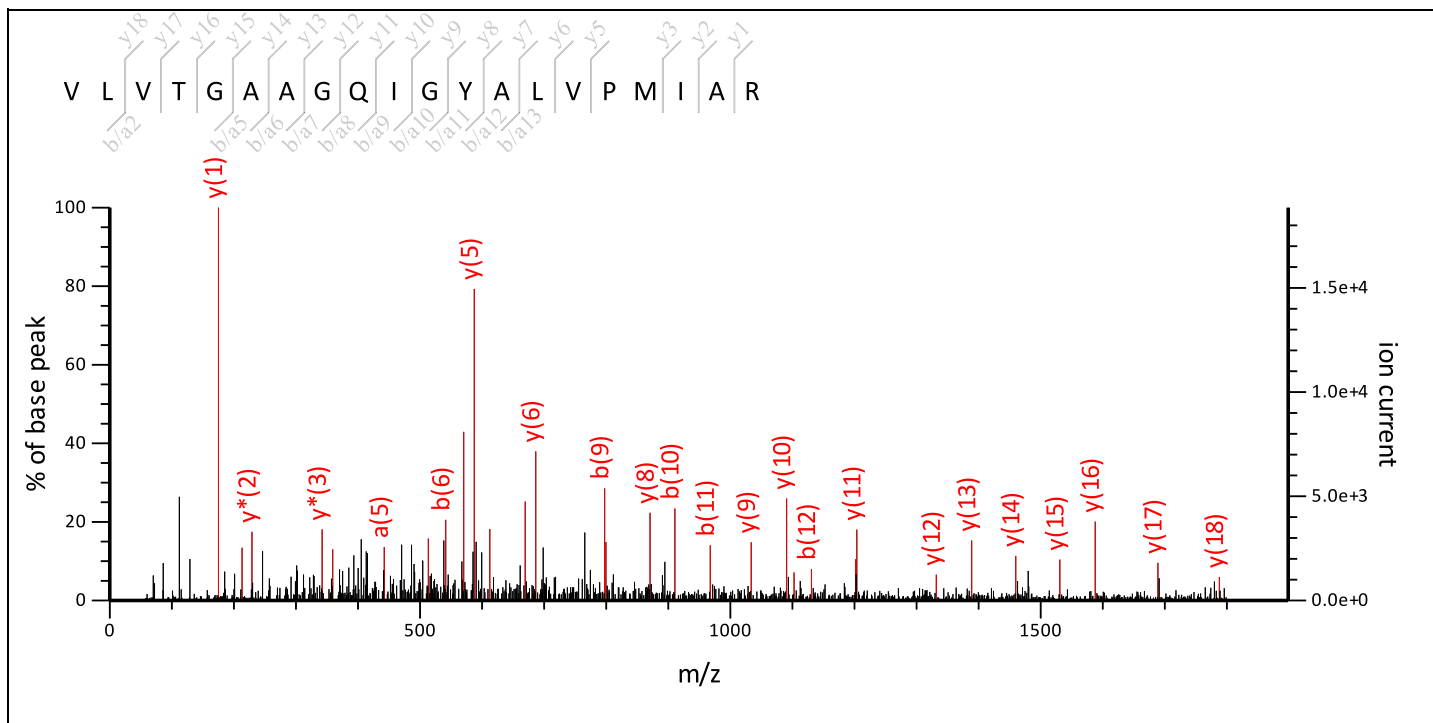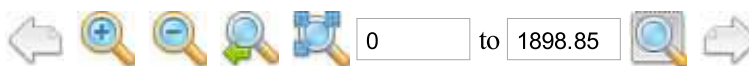

Label all possible matches  Label matches used for scoring

**Monoisotopic mass of neutral peptide Mr(calc):** 1999.1288

**Fixed modifications:** Carbamidomethyl (C) (apply to specified residues or termini only)

**Ions Score:** 117 **Expect:** 2.9e-08

**Matches :** 32/98 fragment ions using 54 most intense peaks ([help](#))

| # | a               | a* | b               | b* | Seq. | y                | y*        | #  |
|---|-----------------|----|-----------------|----|------|------------------|-----------|----|
| 1 | 72.0808         |    | 100.0757        |    | V    |                  |           | 20 |
| 2 | 185.1648        |    | <b>213.1598</b> |    | L    | 1901.0677        | 1884.0412 | 19 |
| 3 | 284.2333        |    | 312.2282        |    | V    | <b>1787.9837</b> | 1770.9571 | 18 |
| 4 | 385.2809        |    | 413.2758        |    | T    | <b>1688.9152</b> | 1671.8887 | 17 |
| 5 | <b>442.3024</b> |    | 470.2973        |    | G    | <b>1587.8676</b> | 1570.8410 | 16 |
| 6 | <b>513.3395</b> |    | <b>541.3344</b> |    | A    | <b>1530.8461</b> | 1513.8195 | 15 |
| 7 | 584.3766        |    | <b>612.3715</b> |    | A    | <b>1459.8090</b> | 1442.7824 | 14 |
| 8 | 641.3981        |    | <b>669.3930</b> |    | G    | <b>1388.7719</b> | 1371.7453 | 13 |

|    |                  |           |                  |           |   |                  |                 |    |
|----|------------------|-----------|------------------|-----------|---|------------------|-----------------|----|
| 9  | 769.4567         | 752.4301  | <b>797.4516</b>  | 780.4250  | Q | <b>1331.7504</b> | 1314.7239       | 12 |
| 10 | 882.5407         | 865.5142  | <b>910.5356</b>  | 893.5091  | I | <b>1203.6918</b> | 1186.6653       | 11 |
| 11 | 939.5622         | 922.5356  | <b>967.5571</b>  | 950.5306  | G | <b>1090.6078</b> | 1073.5812       | 10 |
| 12 | <b>1102.6255</b> | 1085.5990 | <b>1130.6204</b> | 1113.5939 | Y | <b>1033.5863</b> | 1016.5598       | 9  |
| 13 | 1173.6626        | 1156.6361 | <b>1201.6576</b> | 1184.6310 | A | <b>870.5230</b>  | 853.4964        | 8  |
| 14 | 1286.7467        | 1269.7202 | 1314.7416        | 1297.7151 | L | <b>799.4859</b>  | 782.4593        | 7  |
| 15 | 1385.8151        | 1368.7886 | 1413.8100        | 1396.7835 | V | <b>686.4018</b>  | <b>669.3752</b> | 6  |
| 16 | 1482.8679        | 1465.8413 | 1510.8628        | 1493.8362 | P | <b>587.3334</b>  | <b>570.3068</b> | 5  |
| 17 | 1613.9084        | 1596.8818 | 1641.9033        | 1624.8767 | M | 490.2806         | 473.2541        | 4  |
| 18 | 1726.9924        | 1709.9659 | 1754.9873        | 1737.9608 | I | <b>359.2401</b>  | <b>342.2136</b> | 3  |
| 19 | 1798.0295        | 1781.0030 | 1826.0245        | 1808.9979 | A | 246.1561         | <b>229.1295</b> | 2  |
| 20 |                  |           |                  |           | R | <b>175.1190</b>  | 158.0924        | 1  |

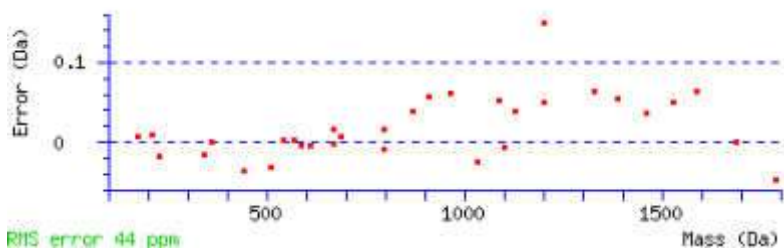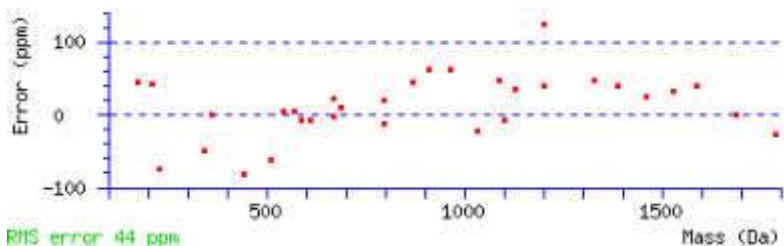

NCBI **BLAST** search of [VLVTGAAGQIGYALVPMIAR](#)

(Parameters: blastp, nr protein database, expect=20000, no filter, PAM30)

Other BLAST [web gateways](#)

#### All matches to this query

| Score | Mr(calc)  | Delta  | Sequence                              |
|-------|-----------|--------|---------------------------------------|
| 117.2 | 1999.1288 | 0.0538 | <a href="#">VLVTGAAGQIGYAIVPMIAR</a>  |
| 117.2 | 1999.1288 | 0.0538 | <a href="#">VLVTGAAGQIGYALVPMIAR</a>  |
| 35.3  | 1999.0521 | 0.1306 | <a href="#">LVSLQQQIASQGGIVMDGR</a>   |
| 24.8  | 1999.1327 | 0.0499 | <a href="#">VRVDAAQGLLHADLGVPLR</a>   |
| 24.0  | 1999.1037 | 0.0790 | <a href="#">NLLAEAGKLAKPGMLGFGGR</a>  |
| 22.1  | 1999.1024 | 0.0803 | <a href="#">IVVDSVLAIGILDQLMER</a>    |
| 22.0  | 1999.1288 | 0.0538 | <a href="#">EKVIASIVHLLQVTFMR</a>     |
| 20.9  | 1999.1215 | 0.0612 | <a href="#">VSVAALAGQGLVAVAKDAFGR</a> |
| 20.9  | 1999.1003 | 0.0823 | <a href="#">VVAITGAGQGIGLAAAWAFAR</a> |
| 19.2  | 1999.0963 | 0.0863 | <a href="#">DAVAALKQHGVDSVLIHR</a>    |





# MATRIX SCIENCE Mascot Search Results

## Peptide View Spot no 60

MS/MS Fragmentation of **VLVTGAAGQIGYALVPMIAR**

Found in **gi|15982948** in **NCBI**nr, NAD-dependent malate dehydrogenase [*Prunus persica*]

Match to Query 256: 2015.162524 from(2016.169800,1+) intensity(0.0000) index(26)

Title: Label: E10, Spot\_Id: 219822, Peak\_List\_Id: 226720, MSMS Job\_Run\_Id: 21854, Comment:

Data file C:\Documents and Settings\Administrator\Desktop\Farah-Garima 11May 2013\ppw\_E10\_136859948400.txt

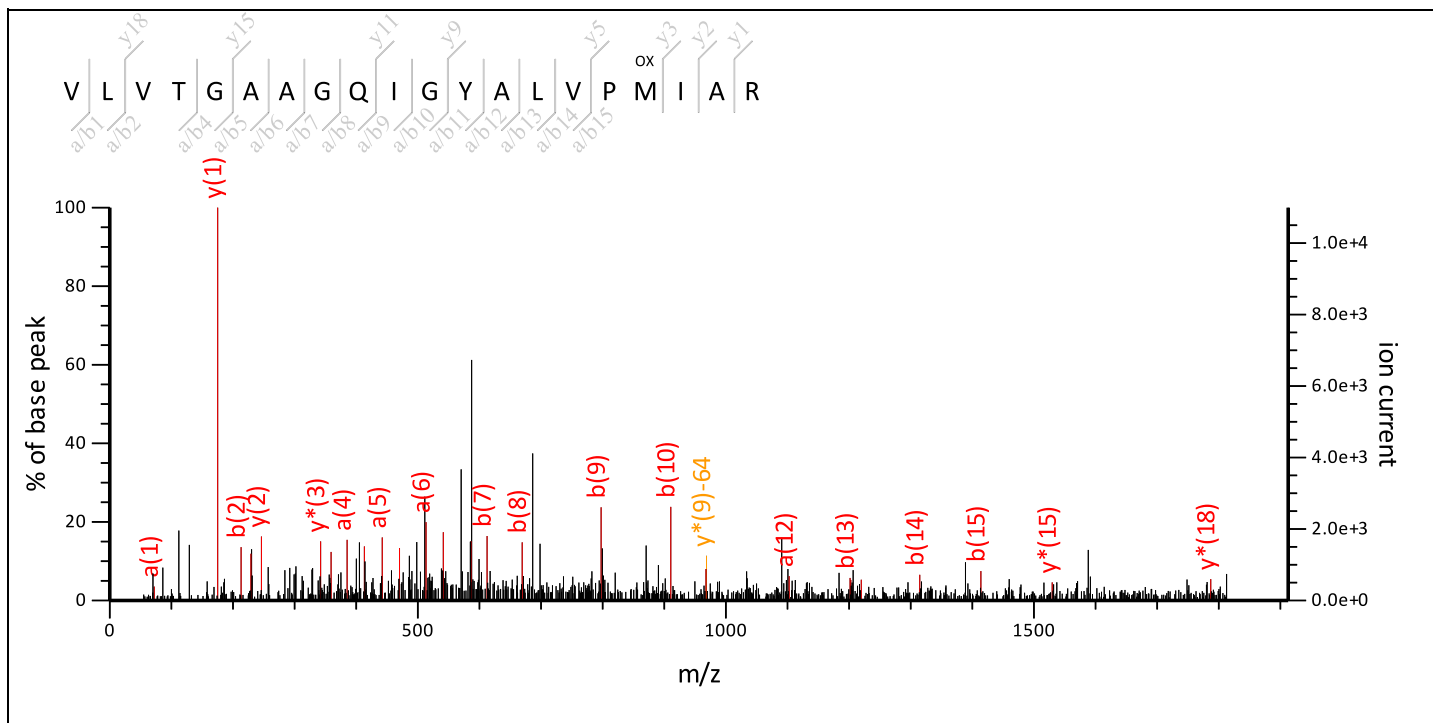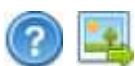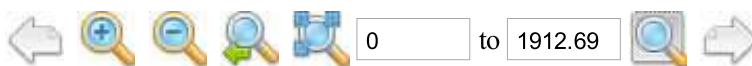

Label all possible matches  Label matches used for scoring

**Monoisotopic mass of neutral peptide Mr(calc):** 2015.1238

**Fixed modifications:** Carbamidomethyl (C) (apply to specified residues or termini only)

**Variable modifications:**

**M17** : Oxidation (M), with neutral losses 0.0000 (shown in table), 63.9983

**Ions Score:** 37 **Expect:** 4.1

**Matches** : 29/142 fragment ions using 90 most intense peaks ([help](#))

| # | a               | a* | b               | b* | Seq.     | y         | y*               | #         |
|---|-----------------|----|-----------------|----|----------|-----------|------------------|-----------|
| 1 | <b>72.0808</b>  |    | 100.0757        |    | <b>V</b> |           |                  | <b>20</b> |
| 2 | 185.1648        |    | <b>213.1598</b> |    | <b>L</b> | 1917.0626 | 1900.0361        | <b>19</b> |
| 3 | 284.2333        |    | 312.2282        |    | <b>V</b> | 1803.9786 | <b>1786.9520</b> | <b>18</b> |
| 4 | <b>385.2809</b> |    | <b>413.2758</b> |    | <b>T</b> | 1704.9102 | 1687.8836        | <b>17</b> |
| 5 | <b>442.3024</b> |    | <b>470.2973</b> |    | <b>G</b> | 1603.8625 | 1586.8359        | <b>16</b> |
| 6 | <b>513.3395</b> |    | <b>541.3344</b> |    | <b>A</b> | 1546.8410 | <b>1529.8145</b> | <b>15</b> |
| 7 | 584.3766        |    | <b>612.3715</b> |    | <b>A</b> | 1475.8039 | 1458.7774        | <b>14</b> |

|    |                  |           |                  |           |   |                  |                  |    |
|----|------------------|-----------|------------------|-----------|---|------------------|------------------|----|
| 8  | 641.3981         |           | <b>669.3930</b>  |           | G | 1404.7668        | 1387.7402        | 13 |
| 9  | 769.4567         | 752.4301  | <b>797.4516</b>  | 780.4250  | Q | 1347.7453        | 1330.7188        | 12 |
| 10 | 882.5407         | 865.5142  | <b>910.5356</b>  | 893.5091  | I | <b>1219.6867</b> | <b>1202.6602</b> | 11 |
| 11 | 939.5622         | 922.5356  | <b>967.5571</b>  | 950.5306  | G | 1106.6027        | 1089.5761        | 10 |
| 12 | <b>1102.6255</b> | 1085.5990 | 1130.6204        | 1113.5939 | Y | 1049.5812        | 1032.5547        | 9  |
| 13 | 1173.6626        | 1156.6361 | <b>1201.6576</b> | 1184.6310 | A | 886.5179         | 869.4913         | 8  |
| 14 | 1286.7467        | 1269.7202 | <b>1314.7416</b> | 1297.7151 | L | 815.4808         | 798.4542         | 7  |
| 15 | 1385.8151        | 1368.7886 | <b>1413.8100</b> | 1396.7835 | V | 702.3967         | 685.3702         | 6  |
| 16 | 1482.8679        | 1465.8413 | 1510.8628        | 1493.8362 | P | 603.3283         | <b>586.3017</b>  | 5  |
| 17 | 1629.9033        | 1612.8767 | 1657.8982        | 1640.8716 | M | 506.2755         | 489.2490         | 4  |
| 18 | 1742.9873        | 1725.9608 | 1770.9823        | 1753.9557 | I | <b>359.2401</b>  | <b>342.2136</b>  | 3  |
| 19 | 1814.0245        | 1796.9979 | 1842.0194        | 1824.9928 | A | <b>246.1561</b>  | <b>229.1295</b>  | 2  |
| 20 |                  |           |                  |           | R | <b>175.1190</b>  | 158.0924         | 1  |

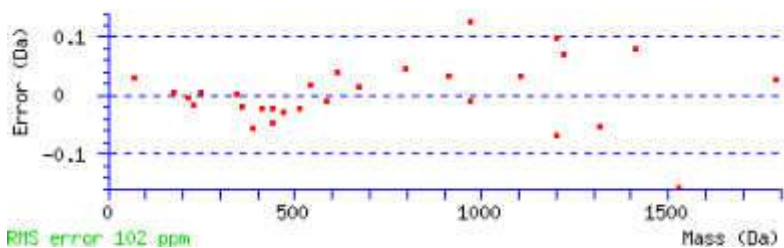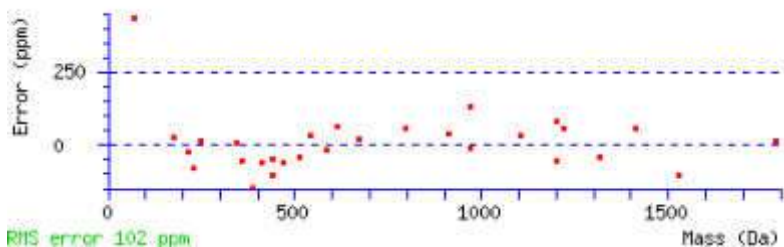

NCBI **BLAST** search of [VLVTGAAGQIGYALVPMIAR](#)

(Parameters: blastp, nr protein database, expect=20000, no filter, PAM30)

Other BLAST [web gateways](#)

#### All matches to this query

| Score | Mr(calc)  | Delta   | Sequence                              |
|-------|-----------|---------|---------------------------------------|
| 36.8  | 2015.1238 | 0.0388  | <a href="#">VLVTGAAGQIGYAIVPMIAR</a>  |
| 36.8  | 2015.1238 | 0.0388  | <a href="#">VLVTGAAGQIGYALVPMIAR</a>  |
| 14.8  | 2015.0795 | 0.0831  | <a href="#">LMLLDAAKLPAIVEEMAR</a>    |
| 12.5  | 2015.1415 | 0.0210  | <a href="#">ILVSGKVLSPSELQLNYR</a>    |
| 12.1  | 2015.1098 | 0.0527  | <a href="#">AFTCQLAVLAALAVGAGRAR</a>  |
| 10.4  | 2015.0575 | 0.1050  | <a href="#">QAALDELSDYIPIIEVAR</a>    |
| 9.1   | 2015.1891 | -0.0266 | <a href="#">LSDAGLAKVAAHPVLSVVLRL</a> |
| 8.9   | 2015.0470 | 0.1156  | <a href="#">VSSAVLAGGRPDTAMVIAER</a>  |
| 8.8   | 2015.0800 | 0.0826  | <a href="#">GTKFSSNVNNGLIPVEIAR</a>   |
| 8.6   | 2015.0874 | 0.0752  | <a href="#">IDAFADLMRPLGLIDIAR</a>    |

**Mascot:** <http://www.matrixscience.com/>

# MATRIX SCIENCE Mascot Search Results

## Peptide View **Spot no 60**

MS/MS Fragmentation of **GVVATTDVVEACTGVNIAVMVGGFPR**

Found in **gi|15982948** in **NCBI**nr, NAD-dependent malate dehydrogenase [*Prunus persica*]

Match to Query 291: 2618.380924 from(2619.388200,1+) intensity(0.0000) index(33)

Title: Label: E10, Spot\_Id: 219822, Peak\_List\_Id: 226731, MSMS Job\_Run\_Id: 21854, Comment:

Data file C:\Documents and Settings\Administrator\Desktop\Farah-Garima 11May 2013\ppw\_E10\_136859948400.txt

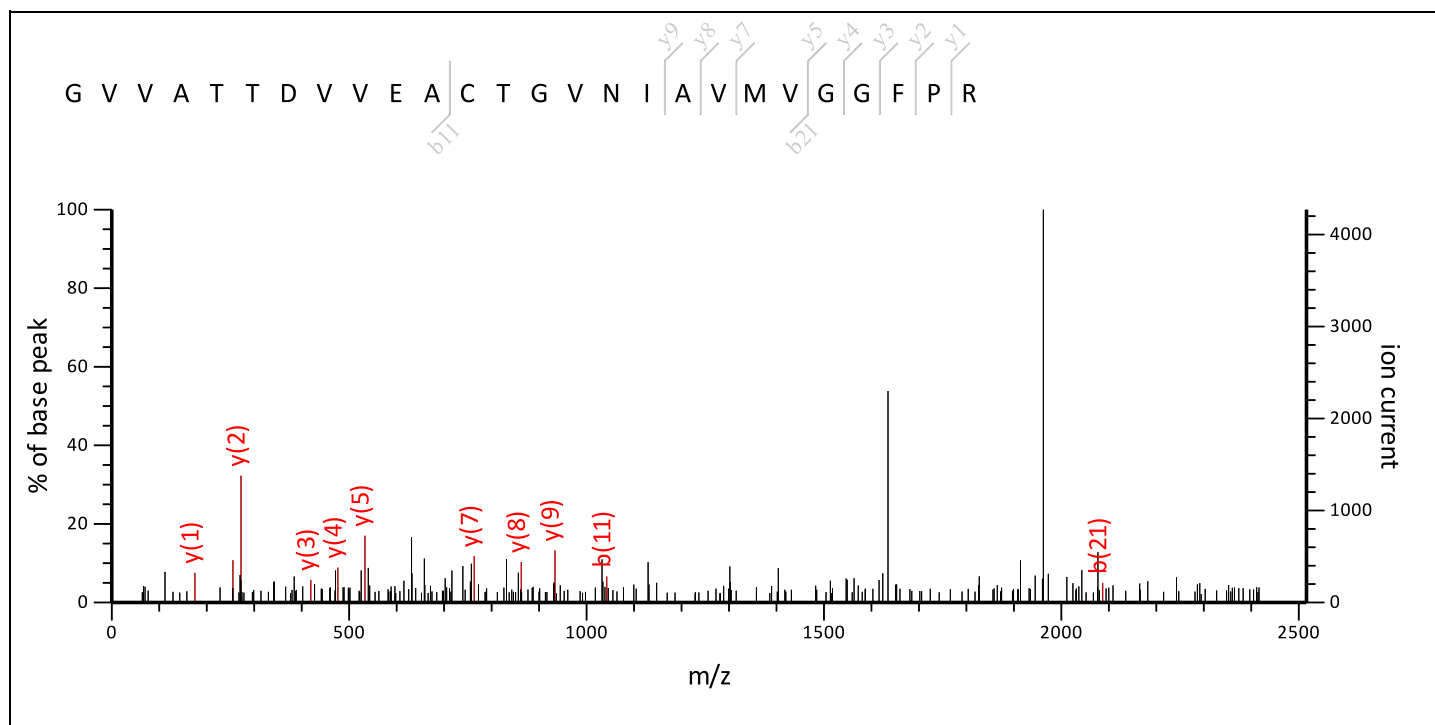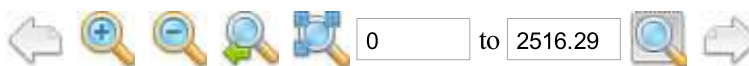

Label all possible matches  Label matches used for scoring

**Monoisotopic mass of neutral peptide Mr(calc):** 2618.3197

**Fixed modifications:** Carbamidomethyl (C) (apply to specified residues or termini only)

**Ions Score:** 10 **Expect:** 1.8e+03

**Matches:** 11/120 fragment ions using 48 most intense peaks ([help](#))

| # | a        | a* | b        | b* | Seq.     | y         | y*        | #         |
|---|----------|----|----------|----|----------|-----------|-----------|-----------|
| 1 | 30.0338  |    | 58.0287  |    | <b>G</b> |           |           | <b>26</b> |
| 2 | 129.1022 |    | 157.0972 |    | <b>V</b> | 2562.3055 | 2545.2789 | <b>25</b> |
| 3 | 228.1707 |    | 256.1656 |    | <b>V</b> | 2463.2370 | 2446.2105 | <b>24</b> |
| 4 | 299.2078 |    | 327.2027 |    | <b>A</b> | 2364.1686 | 2347.1421 | <b>23</b> |
| 5 | 400.2554 |    | 428.2504 |    | <b>T</b> | 2293.1315 | 2276.1050 | <b>22</b> |
| 6 | 501.3031 |    | 529.2980 |    | <b>T</b> | 2192.0838 | 2175.0573 | <b>21</b> |
| 7 | 616.3301 |    | 644.3250 |    | <b>D</b> | 2091.0362 | 2074.0096 | <b>20</b> |
| 8 | 715.3985 |    | 743.3934 |    | <b>V</b> | 1976.0092 | 1958.9827 | <b>19</b> |

|    |           |           |                  |           |   |                 |                 |    |
|----|-----------|-----------|------------------|-----------|---|-----------------|-----------------|----|
| 9  | 814.4669  |           | 842.4618         |           | V | 1876.9408       | 1859.9143       | 18 |
| 10 | 943.5095  |           | 971.5044         |           | E | 1777.8724       | 1760.8458       | 17 |
| 11 | 1014.5466 |           | <b>1042.5415</b> |           | A | 1648.8298       | 1631.8032       | 16 |
| 12 | 1174.5773 |           | 1202.5722        |           | C | 1577.7927       | 1560.7661       | 15 |
| 13 | 1275.6249 |           | 1303.6198        |           | T | 1417.7620       | 1400.7355       | 14 |
| 14 | 1332.6464 |           | 1360.6413        |           | G | 1316.7144       | 1299.6878       | 13 |
| 15 | 1431.7148 |           | 1459.7097        |           | V | 1259.6929       | 1242.6663       | 12 |
| 16 | 1545.7577 | 1528.7312 | 1573.7527        | 1556.7261 | N | 1160.6245       | 1143.5979       | 11 |
| 17 | 1658.8418 | 1641.8153 | 1686.8367        | 1669.8102 | I | 1046.5815       | 1029.5550       | 10 |
| 18 | 1729.8789 | 1712.8524 | 1757.8738        | 1740.8473 | A | <b>933.4975</b> | 916.4709        | 9  |
| 19 | 1828.9473 | 1811.9208 | 1856.9422        | 1839.9157 | V | <b>862.4604</b> | 845.4338        | 8  |
| 20 | 1959.9878 | 1942.9613 | 1987.9827        | 1970.9562 | M | <b>763.3920</b> | 746.3654        | 7  |
| 21 | 2059.0562 | 2042.0297 | <b>2087.0511</b> | 2070.0246 | V | 632.3515        | 615.3249        | 6  |
| 22 | 2116.0777 | 2099.0511 | 2144.0726        | 2127.0461 | G | <b>533.2831</b> | 516.2565        | 5  |
| 23 | 2173.0992 | 2156.0726 | 2201.0941        | 2184.0675 | G | <b>476.2616</b> | 459.2350        | 4  |
| 24 | 2320.1676 | 2303.1410 | 2348.1625        | 2331.1359 | F | <b>419.2401</b> | 402.2136        | 3  |
| 25 | 2417.2203 | 2400.1938 | 2445.2152        | 2428.1887 | P | <b>272.1717</b> | <b>255.1452</b> | 2  |
| 26 |           |           |                  |           | R | <b>175.1190</b> | 158.0924        | 1  |

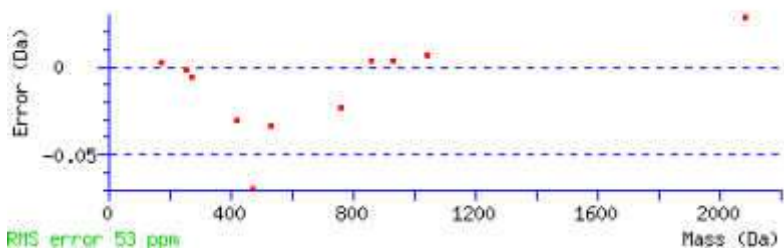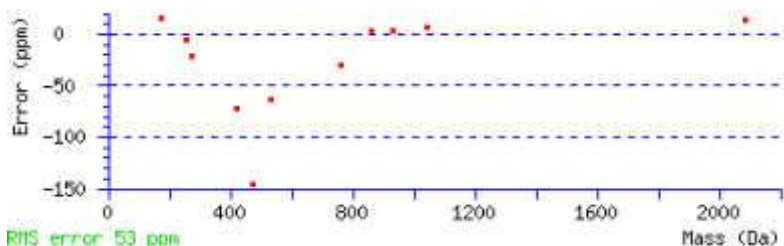

NCBI **BLAST** search of [GVVATTDVVEACTGVNIAVMVGGFPR](#)

(Parameters: blastp, nr protein database, expect=20000, no filter, PAM30)

Other BLAST [web gateways](#)

#### All matches to this query

| Score | Mr(calc)  | Delta  | Sequence                                   |
|-------|-----------|--------|--------------------------------------------|
| 70.2  | 2618.3197 | 0.0612 | <a href="#">GIVATTDVVEACTGVNVAVMVGGFPR</a> |
| 45.0  | 2618.3197 | 0.0612 | <a href="#">GIVATTDVAEACKGVDVAVMVGGFPR</a> |
| 10.1  | 2618.3197 | 0.0612 | <a href="#">GVVATTDVVEACTGVNIAVMVGGFPR</a> |
| 7.1   | 2618.3275 | 0.0535 | <a href="#">WKETLTTALQEHAANPLAPGMPR</a>    |
| 3.5   | 2618.2040 | 0.1769 | <a href="#">QVGVSCASGLQVWGDVVLCCDGPR</a>   |

|     |           |        |                                            |
|-----|-----------|--------|--------------------------------------------|
| 2.7 | 2618.3309 | 0.0500 | <a href="#">NIGCDIVMIDVNQDVAGFITRLR</a>    |
| 2.4 | 2618.2395 | 0.1414 | <a href="#">MLASGGDDDTVILWDLSDRDRPR</a>    |
| 1.2 | 2618.2283 | 0.1527 | <a href="#">TLCDAGYHVSLETSGALDVSGVDPR</a>  |
| 1.2 | 2618.2039 | 0.1770 | <a href="#">TMLALQSHNMTAWLGSESQNMPR</a>    |
| 1.1 | 2618.2567 | 0.1242 | <a href="#">IASALECSTAVLMSEAESQLAAAAQP</a> |

**Mascot:** <http://www.matrixscience.com/>

# MATRIX SCIENCE Mascot Search Results

## Peptide View **Spot no 64**

MS/MS Fragmentation of **VPWSEYR**

Found in **gi|29468084** in **NCBI**nr, aspartate aminotransferase [Oryza sativa]

Match to Query 13: 935.521044 from(936.528320,1+) intensity(0.0000) index(2)

Title: Label: K7, Spot\_Id: 228948, Peak\_List\_Id: 257615, MSMS Job\_Run\_Id: 24928, Comment:

Data file ppw\_K7\_138985140200.txt

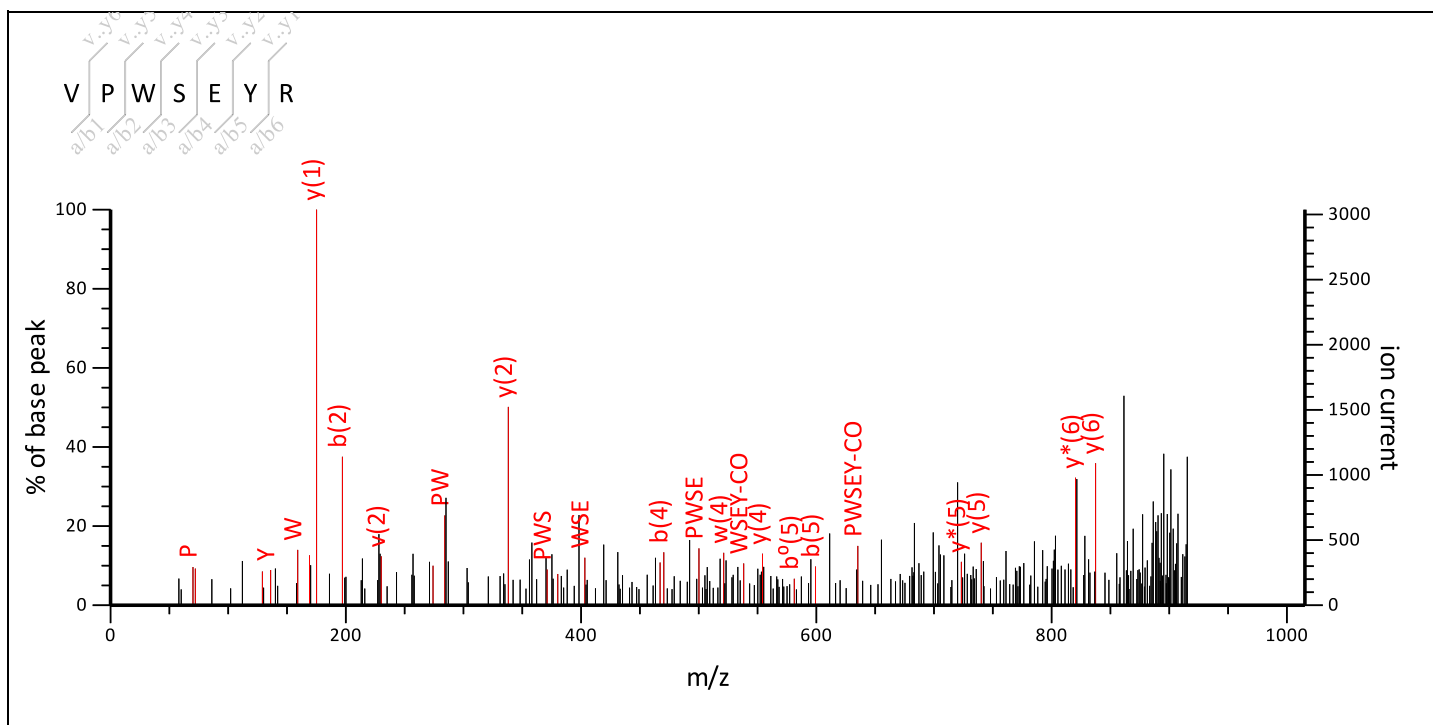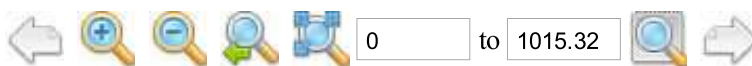

Label all possible matches  Label matches used for scoring

**Monoisotopic mass of neutral peptide Mr(calc):** 935.4501

**Fixed modifications:** Carbamidomethyl (C) (apply to specified residues or termini only)

**Ions Score:** 20 **Expect:** 29

**Matches :** 31/75 fragment ions using 90 most intense peaks ([help](#))

| # | Immon.   | a        | a <sup>0</sup> | b        | b <sup>0</sup> | d        | Seq. | v        | w        | y        | y*       | y <sup>0</sup> | # |
|---|----------|----------|----------------|----------|----------------|----------|------|----------|----------|----------|----------|----------------|---|
| 1 | 72.0808  | 72.0808  |                | 100.0757 |                | 44.0495  | V    |          |          |          |          |                | 7 |
| 2 | 70.0651  | 169.1335 |                | 197.1285 |                | 143.1179 | P    | 795.3420 | 794.3468 | 837.3890 | 820.3624 | 819.3784       | 6 |
| 3 | 159.0917 | 355.2129 |                | 383.2078 |                |          | W    | 609.2627 |          | 740.3362 | 723.3097 | 722.3257       | 5 |
| 4 | 60.0444  | 442.2449 | 424.2343       | 470.2398 | 452.2292       | 426.2500 | S    | 522.2307 | 521.2354 | 554.2569 | 537.2304 | 536.2463       | 4 |
| 5 | 102.0550 | 571.2875 | 553.2769       | 599.2824 | 581.2718       | 513.2820 | E    | 393.1881 | 392.1928 | 467.2249 | 450.1983 | 449.2143       | 3 |
| 6 | 136.0757 | 734.3508 | 716.3402       | 762.3457 | 744.3352       |          | Y    | 230.1248 |          | 338.1823 | 321.1557 |                | 2 |
| 7 | 129.1135 |          |                |          |                |          | R    | 74.0237  | 73.0284  | 175.1190 | 158.0924 |                | 1 |



| Seq   | ya       | yb       | Seq | ya       | yb       | Seq  | ya       | yb       |
|-------|----------|----------|-----|----------|----------|------|----------|----------|
| PW    | 256.1444 | 284.1394 | PWS | 343.1765 | 371.1714 | PWSE | 472.2191 | 500.2140 |
| PWSEY | 635.2824 | 663.2773 | WS  | 246.1237 | 274.1186 | WSE  | 375.1663 | 403.1612 |
| WSEY  | 538.2296 | 566.2245 | SE  | 189.0870 | 217.0819 | SEY  | 352.1503 | 380.1452 |
| EY    | 265.1183 | 293.1132 |     |          |          |      |          |          |

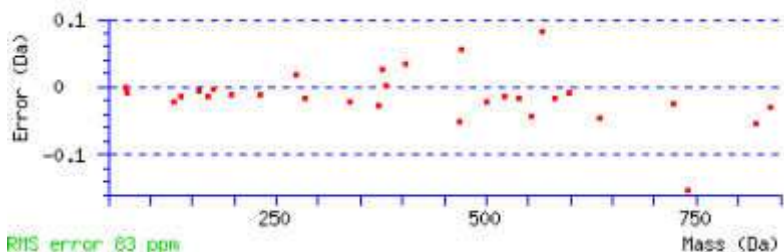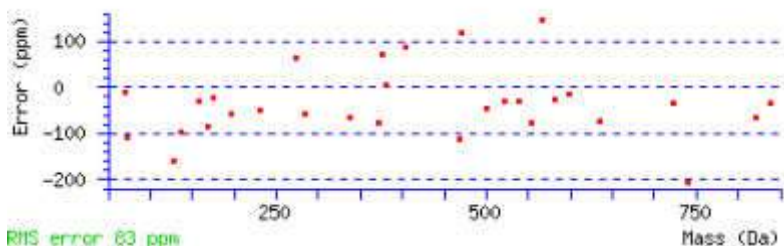

NCBI **BLAST** search of [VPWSEYR](#)

(Parameters: blastp, nr protein database, expect=20000, no filter, PAM30)

Other BLAST [web gateways](#)

#### All matches to this query

| Score | Mr(calc) | Delta   | Sequence                  |
|-------|----------|---------|---------------------------|
| 20.0  | 935.4501 | 0.0709  | <a href="#">VPWSEYR</a>   |
| 17.1  | 935.5262 | -0.0052 | <a href="#">VILCIYR</a>   |
| 17.1  | 935.5076 | 0.0134  | <a href="#">VLIDTGYR</a>  |
| 13.0  | 935.4712 | 0.0498  | <a href="#">DLFSAEVR</a>  |
| 12.3  | 935.5076 | 0.0134  | <a href="#">DLIKEYR</a>   |
| 12.3  | 935.5076 | 0.0134  | <a href="#">DLLKEYR</a>   |
| 10.7  | 935.5188 | 0.0022  | <a href="#">VKNASVYR</a>  |
| 10.6  | 935.4825 | 0.0386  | <a href="#">AANTYIAGR</a> |
| 10.3  | 935.4825 | 0.0386  | <a href="#">EVHAEPVR</a>  |
| 10.2  | 935.4865 | 0.0345  | <a href="#">VPPASFYR</a>  |

Mascot: <http://www.matrixscience.com/>

**MATRIX SCIENCE Mascot Search Results**

**Peptide View Spot no 64**

MS/MS Fragmentation of **GLEVFVAQSYSK**

Found in **gi29468084** in **NCBI**nr, aspartate aminotransferase [Oryza sativa]

Match to Query 45: 1326.763924 from(1327.771200,1+) intensity(0.0000) index(10)

Title: Label: K7, Spot\_Id: 228948, Peak\_List\_Id: 257625, MSMS Job\_Run\_Id: 24928, Comment:

Data file ppw\_K7\_138985140200.txt

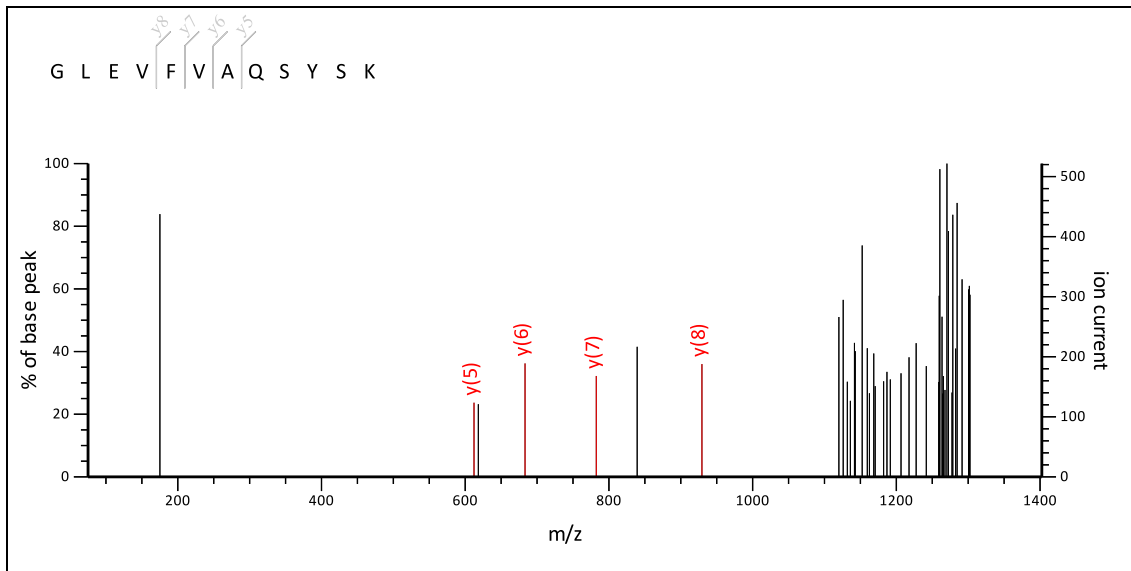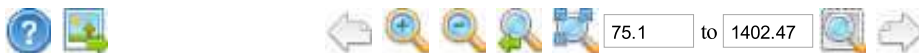

Label all possible matches  Label matches used for scoring

**Monoisotopic mass of neutral peptide Mr(calc):** 1326.6820

**Fixed modifications:** Carbamidomethyl (C) (apply to specified residues or termini only)

**Ions Score:** 7 **Expect:** 3.9e+02

**Matches:** 4/189 fragment ions using 13 most intense peaks ([help](#))

| #  | Immon.   | a         | a*        | a <sup>0</sup> | b         | b*        | b <sup>0</sup> | d         | Seq. | v         | w         | y         | y*        | y <sup>0</sup> | #  |
|----|----------|-----------|-----------|----------------|-----------|-----------|----------------|-----------|------|-----------|-----------|-----------|-----------|----------------|----|
| 1  | 30.0338  | 30.0338   |           |                | 58.0287   |           |                | 44.0495   | G    |           |           |           |           |                | 12 |
| 2  | 86.0964  | 143.1179  |           |                | 171.1128  |           |                | 101.0709  | L    | 1212.5895 | 1211.5943 | 1270.6678 | 1253.6412 | 1252.6572      | 11 |
| 3  | 102.0550 | 272.1605  |           | 254.1499       | 300.1554  |           | 282.1448       | 214.1550  | E    | 1083.5469 | 1082.5517 | 1157.5837 | 1140.5572 | 1139.5732      | 10 |
| 4  | 72.0808  | 371.2289  |           | 353.2183       | 399.2238  |           | 381.2132       | 357.2132  | V    | 984.4785  | 997.4989  | 1028.5411 | 1011.5146 | 1010.5306      | 9  |
| 5  | 120.0808 | 518.2973  |           | 500.2867       | 546.2922  |           | 528.2817       |           | F    | 837.4101  |           | 929.4727  | 912.4462  | 911.4621       | 8  |
| 6  | 72.0808  | 617.3657  |           | 599.3552       | 645.3606  |           | 627.3501       | 603.3501  | V    | 738.3417  | 751.3621  | 782.4043  | 765.3777  | 764.3937       | 7  |
| 7  | 44.0495  | 688.4028  |           | 670.3923       | 716.3978  |           | 698.3872       |           | A    | 667.3046  |           | 683.3359  | 666.3093  | 665.3253       | 6  |
| 8  | 101.0709 | 816.4614  | 799.4349  | 798.4509       | 844.4563  | 827.4298  | 826.4458       | 759.4400  | Q    | 539.2460  | 538.2508  | 612.2988  | 595.2722  | 594.2882       | 5  |
| 9  | 60.0444  | 903.4934  | 886.4669  | 885.4829       | 931.4884  | 914.4618  | 913.4778       | 887.4985  | S    | 452.2140  | 451.2187  | 484.2402  | 467.2136  | 466.2296       | 4  |
| 10 | 136.0757 | 1066.5568 | 1049.5302 | 1048.5462      | 1094.5517 | 1077.5251 | 1076.5411      |           | Y    | 289.1506  |           | 397.2082  | 380.1816  | 379.1976       | 3  |
| 11 | 60.0444  | 1153.5888 | 1136.5623 | 1135.5782      | 1181.5837 | 1164.5572 | 1163.5732      | 1137.5939 | S    | 202.1186  | 201.1234  | 234.1448  | 217.1183  | 216.1343       | 2  |
| 12 | 101.1073 |           |           |                |           |           |                |           | K    | 74.0237   | 73.0284   | 147.1128  | 130.0863  |                | 1  |

| Seq    | ya       | yb       | Seq   | ya       | yb       | Seq    | ya       | yb       |
|--------|----------|----------|-------|----------|----------|--------|----------|----------|
| LE     | 215.1390 | 243.1339 | LEV   | 314.2074 | 342.2023 | LEVF   | 461.2758 | 489.2708 |
| LEVFV  | 560.3443 | 588.3392 | LEVFA | 631.3814 | 659.3763 | EV     | 201.1234 | 229.1183 |
| EVF    | 348.1918 | 376.1867 | EVFV  | 447.2602 | 475.2551 | EVFVA  | 518.2973 | 546.2922 |
| EVFVAQ | 646.3559 | 674.3508 | VF    | 219.1492 | 247.1441 | VFV    | 318.2176 | 346.2125 |
| VFVA   | 389.2547 | 417.2496 | VFVAQ | 517.3133 | 545.3082 | VFVAQS | 604.3453 | 632.3402 |

|               |          |          |               |          |          |              |          |          |
|---------------|----------|----------|---------------|----------|----------|--------------|----------|----------|
| <b>FV</b>     | 219.1492 | 247.1441 | <b>FVA</b>    | 290.1863 | 318.1812 | <b>FVAQ</b>  | 418.2449 | 446.2398 |
| <b>FVAQS</b>  | 505.2769 | 533.2718 | <b>FVAQSY</b> | 668.3402 | 696.3352 | <b>VA</b>    | 143.1179 | 171.1128 |
| <b>VAQ</b>    | 271.1765 | 299.1714 | <b>VAQS</b>   | 358.2085 | 386.2034 | <b>VAQSY</b> | 521.2718 | 549.2667 |
| <b>VAQSYS</b> | 608.3039 | 636.2988 | <b>AQ</b>     | 172.1081 | 200.1030 | <b>AQS</b>   | 259.1401 | 287.1350 |
| <b>AQSY</b>   | 422.2034 | 450.1983 | <b>AQSYS</b>  | 509.2354 | 537.2304 | <b>QS</b>    | 188.1030 | 216.0979 |
| <b>QSY</b>    | 351.1663 | 379.1612 | <b>QSYS</b>   | 438.1983 | 466.1932 | <b>SY</b>    | 223.1077 | 251.1026 |
| <b>SYS</b>    | 310.1397 | 338.1347 | <b>YS</b>     | 223.1077 | 251.1026 |              |          |          |

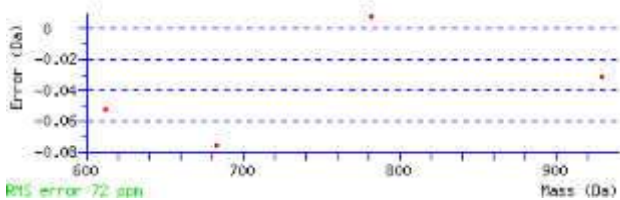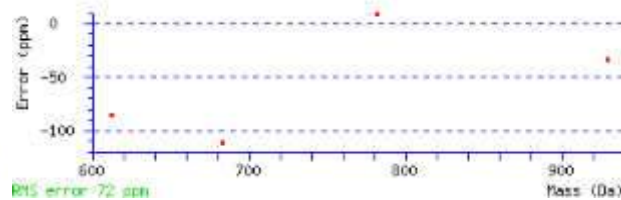

NCBI BLAST search of [GLEVFVAQSYSK](#)

(Parameters: blastp, nr protein database, expect=20000, no filter, PAM30)

Other BLAST [web gateways](#)

#### All matches to this query

| Score | Mr(calc)  | Delta  | Sequence                       |
|-------|-----------|--------|--------------------------------|
| 7.8   | 1326.6602 | 0.1038 | <a href="#">DSVRVMNLYSK</a>    |
| 7.8   | 1326.6979 | 0.0660 | <a href="#">KVFNRPPPGCR</a>    |
| 7.5   | 1326.6503 | 0.1136 | <a href="#">VMGNLPARFGEH</a>   |
| 7.2   | 1326.6826 | 0.0813 | <a href="#">MATAAPPAASGARR</a> |
| 7.2   | 1326.6640 | 0.0999 | <a href="#">VGASSSVGHDGAKR</a> |
| 6.7   | 1326.6820 | 0.0820 | <a href="#">GLEVFVAQSYSK</a>   |
| 6.3   | 1326.6317 | 0.1323 | <a href="#">GGLGEGSNVYNSR</a>  |
| 5.8   | 1326.7408 | 0.0231 | <a href="#">IADV LKASEAHR</a>  |
| 5.8   | 1326.7520 | 0.0119 | <a href="#">VLWRGAGLAQTR</a>   |
| 5.6   | 1326.6891 | 0.0748 | <a href="#">VALEAQVOARNE</a>   |

Mascot: <http://www.matrixscience.com/>


**Mascot Search Results**
**Peptide View** Spot no **64**
**MS/MS Fragmentation of VATLQSLSGTGLR**

 Found in **gi29468084** in **NCBI**nr, aspartate aminotransferase [Oryza sativa]

Match to Query 54: 1388.883824 from(1389.891100,1+) intensity(0.0000) index(13)

Title: Label: K7, Spot\_Id: 228948, Peak\_List\_Id: 257621, MSMS Job\_Run\_Id: 24928, Comment:

Data file ppw\_K7\_138985140200.txt

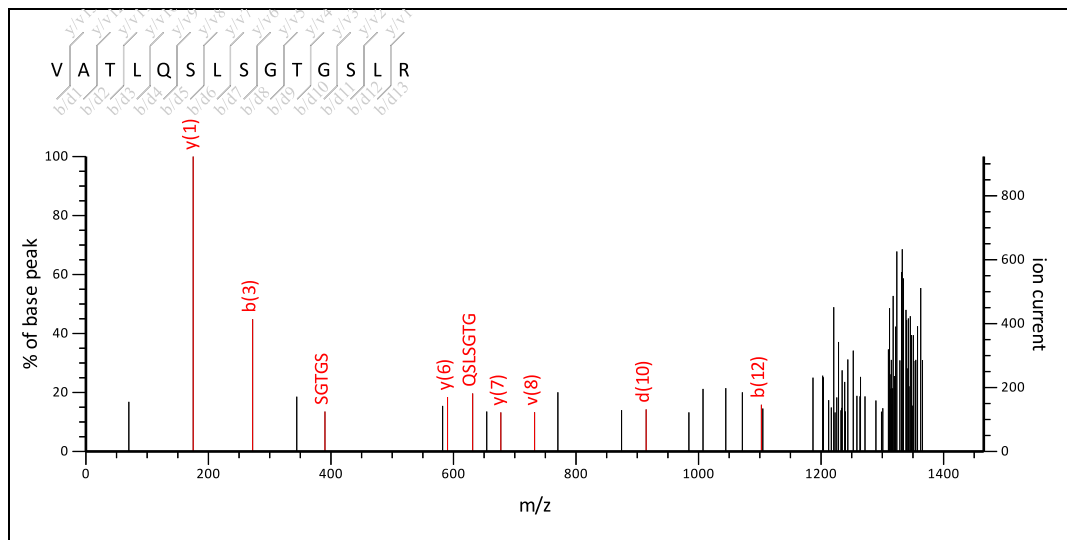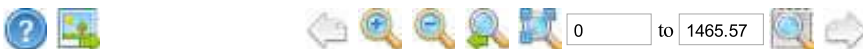
 Label all possible matches  Label matches used for scoring 

Monoisotopic mass of neutral peptide Mr(calc): 1388.7623

Fixed modifications: Carbamidomethyl (C) (apply to specified residues or termini only)

Ions Score: 8 Expect: 1.1e+02

 Matches : 10/255 fragment ions using 20 most intense peaks ([help](#))

| #  | Immon.   | a         | a*        | a <sup>0</sup> | b                | b*        | b <sup>0</sup> | d               | d'       | Seq. | v               | w         | w'        | y               | y*        |
|----|----------|-----------|-----------|----------------|------------------|-----------|----------------|-----------------|----------|------|-----------------|-----------|-----------|-----------------|-----------|
| 1  | 72.0808  | 72.0808   |           |                | 100.0757         |           |                | 44.0495         |          | V    |                 |           |           |                 |           |
| 2  | 44.0495  | 143.1179  |           |                | 171.1128         |           |                |                 |          | A    | 1274.6699       |           |           | 1290.7012       | 1273.6747 |
| 3  | 74.0600  | 244.1656  |           | 226.1550       | <b>272.1605</b>  |           | 254.1499       | 228.1707        | 230.1499 | T    | 1173.6222       | 1186.6426 | 1188.6219 | 1219.6641       | 1202.6375 |
| 4  | 86.0964  | 357.2496  |           | 339.2391       | 385.2445         |           | 367.2340       | 315.2027        |          | L    | 1060.5382       | 1059.5429 |           | 1118.6164       | 1101.5899 |
| 5  | 101.0709 | 485.3082  | 468.2817  | 467.2976       | 513.3031         | 496.2766  | 495.2926       | 428.2867        |          | Q    | 932.4796        | 931.4843  |           | 1005.5323       | 988.5058  |
| 6  | 60.0444  | 572.3402  | 555.3137  | 554.3297       | 600.3352         | 583.3086  | 582.3246       | 556.3453        |          | S    | 845.4476        | 844.4523  |           | 877.4738        | 860.4472  |
| 7  | 86.0964  | 685.4243  | 668.3978  | 667.4137       | 713.4192         | 696.3927  | 695.4087       | 643.3774        |          | L    | <b>732.3635</b> | 731.3682  |           | 790.4417        | 773.4152  |
| 8  | 60.0444  | 772.4563  | 755.4298  | 754.4458       | 800.4512         | 783.4247  | 782.4407       | 756.4614        |          | S    | 645.3315        | 644.3362  |           | <b>677.3577</b> | 660.3311  |
| 9  | 30.0338  | 829.4778  | 812.4512  | 811.4672       | 857.4727         | 840.4462  | 839.4621       |                 |          | G    |                 |           |           | <b>590.3257</b> | 573.2991  |
| 10 | 74.0600  | 930.5255  | 913.4989  | 912.5149       | 958.5204         | 941.4938  | 940.5098       | <b>914.5306</b> | 916.5098 | T    | 487.2623        | 500.2827  | 502.2620  | 533.3042        | 516.2776  |
| 11 | 30.0338  | 987.5469  | 970.5204  | 969.5364       | 1015.5419        | 998.5153  | 997.5313       |                 |          | G    |                 |           |           | 432.2565        | 415.2300  |
| 12 | 60.0444  | 1074.5790 | 1057.5524 | 1056.5684      | <b>1102.5739</b> | 1085.5473 | 1084.5633      | 1058.5841       |          | S    | 343.2088        | 342.2136  |           | 375.2350        | 358.2085  |
| 13 | 86.0964  | 1187.6630 | 1170.6365 | 1169.6525      | 1215.6579        | 1198.6314 | 1197.6474      | 1145.6161       |          | L    | 230.1248        | 229.1295  |           | 288.2030        | 271.1765  |
| 14 | 129.1135 |           |           |                |                  |           |                |                 |          | R    | 74.0237         | 73.0284   |           | <b>175.1190</b> | 158.0924  |

| Seq   | ya       | yb       | Seq    | ya       | yb       | Seq     | ya       | yb       |
|-------|----------|----------|--------|----------|----------|---------|----------|----------|
| AT    | 145.0972 | 173.0921 | ATL    | 258.1812 | 286.1761 | ATLQ    | 386.2398 | 414.2347 |
| ATLQS | 473.2718 | 501.2667 | ATLQSL | 586.3559 | 614.3508 | ATLQSLS | 673.3879 | 701.3828 |
| TL    | 187.1441 | 215.1390 | TLQ    | 315.2027 | 343.1976 | TLQS    | 402.2347 | 430.2296 |
| TLQSL | 515.3188 | 543.3137 | TLQSLS | 602.3508 | 630.3457 | TLQSLSG | 659.3723 | 687.3672 |
| LQ    | 214.1550 | 242.1499 | LQS    | 301.1870 | 329.1819 | LQSL    | 414.2711 | 442.2660 |
| LQSLS | 501.3031 | 529.2980 | LQSLSG | 558.3246 | 586.3195 | LQSLSGT | 659.3723 | 687.3672 |

|          |          |          |          |          |          |         |          |          |
|----------|----------|----------|----------|----------|----------|---------|----------|----------|
| QS       | 188.1030 | 216.0979 | QSL      | 301.1870 | 329.1819 | QSLS    | 388.2191 | 416.2140 |
| QSLSG    | 445.2405 | 473.2354 | QSLSGT   | 546.2882 | 574.2831 | QSLSGTG | 603.3097 | 631.3046 |
| QSLSGTGS | 690.3417 | 718.3366 | SL       | 173.1285 | 201.1234 | SLS     | 260.1605 | 288.1554 |
| SLSG     | 317.1819 | 345.1769 | SLSGT    | 418.2296 | 446.2245 | SLSGTG  | 475.2511 | 503.2460 |
| SLSGTGS  | 562.2831 | 590.2780 | SLSGTGSL | 675.3672 | 703.3621 | LS      | 173.1285 | 201.1234 |
| LSG      | 230.1499 | 258.1448 | LSGT     | 331.1976 | 359.1925 | LSGTG   | 388.2191 | 416.2140 |
| LSGTGS   | 475.2511 | 503.2460 | LSGTGSL  | 588.3352 | 616.3301 | SG      | 117.0659 | 145.0608 |
| SGT      | 218.1135 | 246.1084 | SGTG     | 275.1350 | 303.1299 | SGTGS   | 362.1670 | 390.1619 |
| SGTGSL   | 475.2511 | 503.2460 | GT       | 131.0815 | 159.0764 | GTG     | 188.1030 | 216.0979 |
| GTGS     | 275.1350 | 303.1299 | GTGSL    | 388.2191 | 416.2140 | TG      | 131.0815 | 159.0764 |
| TGS      | 218.1135 | 246.1084 | TGSL     | 331.1976 | 359.1925 | GS      | 117.0659 | 145.0608 |
| GSL      | 230.1499 | 258.1448 | SL       | 173.1285 | 201.1234 |         |          |          |

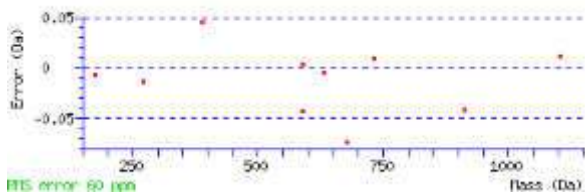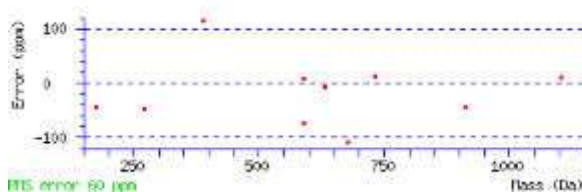

NCBI BLAST search of [VATLOSLSGTGSLR](#)

(Parameters: blastp, nr protein database, expect=20000, no filter, PAM30)

Other BLAST [web gateways](#)

#### All matches to this query

| Score | Mr(calc)  | Delta  | Sequence                       |
|-------|-----------|--------|--------------------------------|
| 7.8   | 1388.7623 | 0.1215 | <a href="#">VATIOSLSGTGSLR</a> |
| 7.8   | 1388.7623 | 0.1215 | <a href="#">VATLOSLSGTGSLR</a> |
| 7.2   | 1388.7623 | 0.1215 | <a href="#">SSITIELRNOK</a>    |
| 7.0   | 1388.7452 | 0.1386 | <a href="#">GLIFQEYLPGPR</a>   |
| 7.0   | 1388.7875 | 0.0963 | <a href="#">SDKSISIIQTGLK</a>  |
| 6.9   | 1388.7565 | 0.1274 | <a href="#">GGRIFVYDLPPR</a>   |
| 6.9   | 1388.7663 | 0.1175 | <a href="#">GVLISVYEEKPR</a>   |
| 6.5   | 1388.7452 | 0.1386 | <a href="#">GSSFPLIPPFATR</a>  |
| 6.0   | 1388.7598 | 0.1240 | <a href="#">LKSFQIQCIPIR</a>   |
| 6.0   | 1388.7452 | 0.1386 | <a href="#">VTQFLPAPYTPR</a>   |

Mascot: <http://www.matrixscience.com/>

**MATRIX SCIENCE Mascot Search Results**

**Peptide View Spot no 64**

MS/MS Fragmentation of **LARPMYSNPPIHGAR**

Found in **gi29468084** in **NCBI**nr, aspartate aminotransferase [Oryza sativa]

Match to Query 73: 1678.996124 from(1680.003400,1+) intensity(0.0000) index(20)  
 Title: Label: K7, Spot\_Id: 228948, Peak\_List\_Id: 257619, MSMS Job\_Run\_Id: 24928, Comment:  
 Data file ppw\_K7\_138985140200.txt

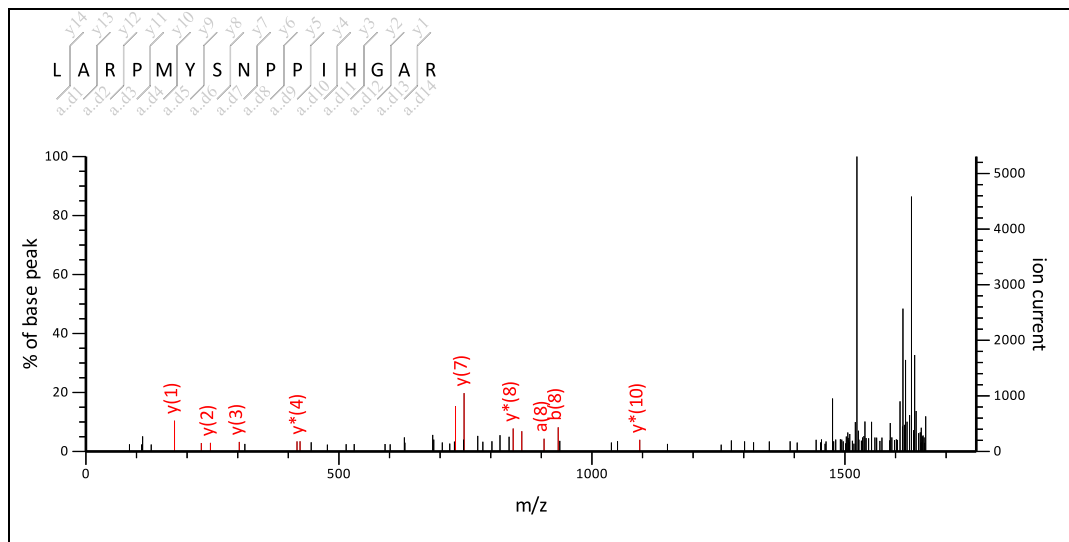

Navigation icons: Home, Back, Forward, Search, etc. Range: 0 to 1759.61

Label all possible matches  Label matches used for scoring

Monoisotopic mass of neutral peptide Mr(calc): 1678.8725  
 Fixed modifications: Carbamidomethyl (C) (apply to specified residues or termini only)  
 Ions Score: 8 Expect: 1.7e+02  
 Matches : 14/250 fragment ions using 32 most intense peaks (help)

| #  | Immon.   | a         | a*        | a <sup>0</sup> | b         | b*        | b <sup>0</sup> | d         | d'        | Seq. | v         | w         | w'       | y         | y*        |
|----|----------|-----------|-----------|----------------|-----------|-----------|----------------|-----------|-----------|------|-----------|-----------|----------|-----------|-----------|
| 1  | 86.0964  | 86.0964   |           |                | 114.0913  |           |                | 44.0495   |           | L    |           |           |          |           |           |
| 2  | 44.0495  | 157.1335  |           |                | 185.1285  |           |                |           |           | A    | 1550.7645 |           |          | 1566.7958 | 1549.7692 |
| 3  | 129.1135 | 313.2346  | 296.2081  |                | 341.2296  | 324.2030  |                | 228.1707  |           | R    | 1394.6634 | 1393.6681 |          | 1495.7587 | 1478.7321 |
| 4  | 70.0651  | 410.2874  | 393.2609  |                | 438.2823  | 421.2558  |                | 384.2718  |           | P    | 1297.6106 | 1296.6154 |          | 1339.6576 | 1322.6310 |
| 5  | 104.0528 | 541.3279  | 524.3013  |                | 569.3228  | 552.2963  |                | 481.3245  |           | M    | 1166.5701 | 1165.5749 |          | 1242.6048 | 1225.5783 |
| 6  | 136.0757 | 704.3912  | 687.3647  |                | 732.3861  | 715.3596  |                |           |           | Y    | 1003.5068 |           |          | 1111.5643 | 1094.5378 |
| 7  | 60.0444  | 791.4233  | 774.3967  | 773.4127       | 819.4182  | 802.3916  | 801.4076       | 775.4283  |           | S    | 916.4748  | 915.4795  |          | 948.5010  | 931.4744  |
| 8  | 87.0553  | 905.4662  | 888.4396  | 887.4556       | 933.4611  | 916.4345  | 915.4505       | 862.4604  |           | N    | 802.4318  | 801.4366  |          | 861.4690  | 844.4424  |
| 9  | 70.0651  | 1002.5189 | 985.4924  | 984.5084       | 1030.5139 | 1013.4873 | 1012.5033      | 976.5033  |           | P    | 705.3791  | 704.3838  |          | 747.4260  | 730.3995  |
| 10 | 70.0651  | 1099.5717 | 1082.5452 | 1081.5611      | 1127.5666 | 1110.5401 | 1109.5561      | 1073.5561 |           | P    | 608.3263  | 607.3311  |          | 650.3733  | 633.3467  |
| 11 | 86.0964  | 1212.6558 | 1195.6292 | 1194.6452      | 1240.6507 | 1223.6241 | 1222.6401      | 1184.6245 | 1198.6401 | I    | 495.2423  | 508.2627  | 522.2783 | 553.3205  | 536.2940  |
| 12 | 110.0713 | 1349.7147 | 1332.6881 | 1331.7041      | 1377.7096 | 1360.6831 | 1359.6990      |           |           | H    | 358.1833  |           |          | 440.2364  | 423.2099  |
| 13 | 30.0338  | 1406.7362 | 1389.7096 | 1388.7256      | 1434.7311 | 1417.7045 | 1416.7205      |           |           | G    |           |           |          | 303.1775  | 286.1510  |
| 14 | 44.0495  | 1477.7733 | 1460.7467 | 1459.7627      | 1505.7682 | 1488.7416 | 1487.7576      |           |           | A    | 230.1248  |           |          | 246.1561  | 229.1295  |
| 15 | 129.1135 |           |           |                |           |           |                |           |           | R    | 74.0237   | 73.0284   |          | 175.1190  | 158.0924  |

| Seq   | ya       | yb       | Seq    | ya       | yb       | Seq   | ya       | yb       |
|-------|----------|----------|--------|----------|----------|-------|----------|----------|
| AR    | 200.1506 | 228.1455 | ARP    | 297.2033 | 325.1983 | ARPM  | 428.2438 | 456.2387 |
| ARPMY | 591.3072 | 619.3021 | ARPMYS | 678.3392 | 706.3341 | RP    | 226.1662 | 254.1612 |
| RPM   | 357.2067 | 385.2016 | RPMY   | 520.2700 | 548.2650 | RPMYS | 607.3021 | 635.2970 |
| PM    | 201.1056 | 229.1005 | PMY    | 364.1689 | 392.1639 | PMYS  | 451.2010 | 479.1959 |
| PMYSN | 565.2439 | 593.2388 | PMYSNP | 662.2967 | 690.2916 | MY    | 267.1162 | 295.1111 |

|               |          |          |               |          |          |                |          |          |
|---------------|----------|----------|---------------|----------|----------|----------------|----------|----------|
| <b>MYS</b>    | 354.1482 | 382.1431 | <b>MYSN</b>   | 468.1911 | 496.1860 | <b>MYSNP</b>   | 565.2439 | 593.2388 |
| <b>MYSNPP</b> | 662.2967 | 690.2916 | <b>YS</b>     | 223.1077 | 251.1026 | <b>YSN</b>     | 337.1506 | 365.1456 |
| <b>YSNP</b>   | 434.2034 | 462.1983 | <b>YSNPP</b>  | 531.2562 | 559.2511 | <b>YSNPPI</b>  | 644.3402 | 672.3352 |
| <b>SN</b>     | 174.0873 | 202.0822 | <b>SNP</b>    | 271.1401 | 299.1350 | <b>SNPP</b>    | 368.1928 | 396.1878 |
| <b>SNPPI</b>  | 481.2769 | 509.2718 | <b>SNPPIH</b> | 618.3358 | 646.3307 | <b>SNPPIHG</b> | 675.3573 | 703.3522 |
| <b>NP</b>     | 184.1081 | 212.1030 | <b>NPP</b>    | 281.1608 | 309.1557 | <b>NPPI</b>    | 394.2449 | 422.2398 |
| <b>NPPIH</b>  | 531.3038 | 559.2987 | <b>NPPIHG</b> | 588.3253 | 616.3202 | <b>NPPIHGA</b> | 659.3624 | 687.3573 |
| <b>PP</b>     | 167.1179 | 195.1128 | <b>PPI</b>    | 280.2020 | 308.1969 | <b>PPIH</b>    | 417.2609 | 445.2558 |
| <b>PPIHG</b>  | 474.2823 | 502.2772 | <b>PPIHGA</b> | 545.3194 | 573.3144 | <b>PI</b>      | 183.1492 | 211.1441 |
| <b>PIH</b>    | 320.2081 | 348.2030 | <b>PIHG</b>   | 377.2296 | 405.2245 | <b>PIHGA</b>   | 448.2667 | 476.2616 |
| <b>IH</b>     | 223.1553 | 251.1503 | <b>IHG</b>    | 280.1768 | 308.1717 | <b>IHGA</b>    | 351.2139 | 379.2088 |
| <b>HG</b>     | 167.0927 | 195.0877 | <b>HGA</b>    | 238.1299 | 266.1248 | <b>GA</b>      | 101.0709 | 129.0659 |

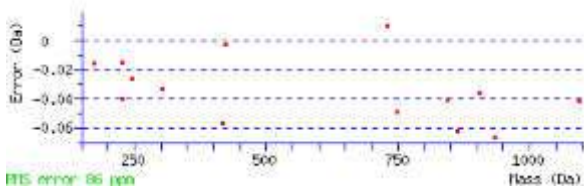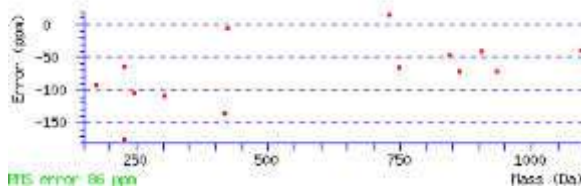

NCBI BLAST search of [LARPMYSNPPIHGAR](#)

(Parameters: blastp, nr protein database, expect=20000, no filter, PAM30)

Other BLAST [web gateways](#)

#### All matches to this query

| Score | Mr(calc)  | Delta  | Sequence                           |
|-------|-----------|--------|------------------------------------|
| 13.7  | 1678.8362 | 0.1599 | <a href="#">RSNCSEWLVGGLGAR</a>    |
| 9.8   | 1678.9114 | 0.0847 | <a href="#">RLLLENPSVGSNGPAR</a>   |
| 9.7   | 1678.8573 | 0.1388 | <a href="#">MVTGDNHTAKHIAR</a>     |
| 9.6   | 1678.8499 | 0.1462 | <a href="#">RSSSNHNNIPKPNK</a>     |
| 9.2   | 1678.8322 | 0.1640 | <a href="#">RHVAGAGTPSSAPMGGAR</a> |
| 9.1   | 1678.8317 | 0.1644 | <a href="#">RIGMSMKPCLELGR</a>     |
| 8.9   | 1678.9036 | 0.0925 | <a href="#">RSTLSTTTIAIMQR</a>     |
| 8.5   | 1678.8725 | 0.1236 | <a href="#">LARPMYSNPPIHGAR</a>    |
| 8.5   | 1678.8725 | 0.1236 | <a href="#">LARPMYSNPPIHGAR</a>    |
| 8.2   | 1678.8751 | 0.1210 | <a href="#">RGVAVSOSTYTVQOR</a>    |

Mascot: <http://www.matrixscience.com/>



**MATRIX SCIENCE Mascot Search Results**

**Peptide View Spot no 64**

MS/MS Fragmentation of **LARPMYSNPPIHGAR**

Found in **gi29468084** in **NCBI**nr, aspartate aminotransferase [Oryza sativa]

Match to Query 75: 1694.980024 from(1695.987300,1+) intensity(0.0000) index(21)  
 Title: Label: K7, Spot\_Id: 228948, Peak\_List\_Id: 257620, MSMS Job\_Run\_Id: 24928, Comment:  
 Data file ppw\_K7\_138985140200.txt

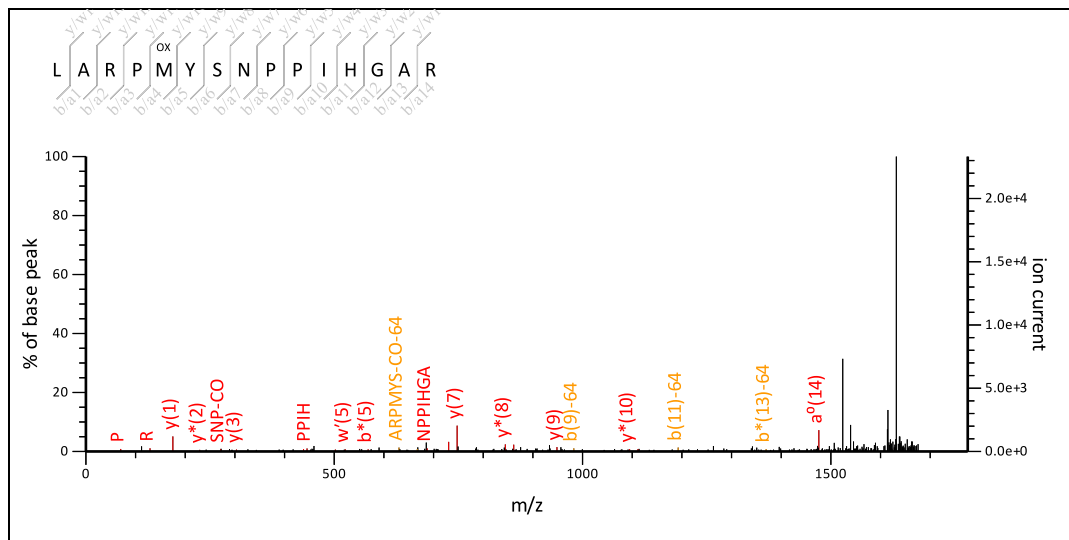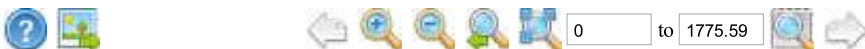

Label all possible matches  Label matches used for scoring

**Monoisotopic mass of neutral peptide Mr(calc):** 1694.8675  
**Fixed modifications:** Carbamidomethyl (C) (apply to specified residues or termini only)  
**Variable modifications:**  
 M5 : Oxidation (M), with neutral losses 63.9983(shown in table), 0.0000  
**Ions Score:** 13 **Expect:** 82  
**Matches :** 29/365 fragment ions using 77 most intense peaks ([help](#))

| #  | Immon.   | a         | a*        | a <sup>0</sup> | b         | b*        | b <sup>0</sup> | d         | d'        | Seq. | v         | w         | w'       | y         | y*        |
|----|----------|-----------|-----------|----------------|-----------|-----------|----------------|-----------|-----------|------|-----------|-----------|----------|-----------|-----------|
| 1  | 86.0964  | 86.0964   |           |                | 114.0913  |           |                | 44.0495   |           | L    |           |           |          |           |           |
| 2  | 44.0495  | 157.1335  |           |                | 185.1285  |           |                |           |           | A    | 1502.7611 |           |          | 1518.7924 | 1501.7659 |
| 3  | 129.1135 | 313.2346  | 296.2081  |                | 341.2296  | 324.2030  |                | 228.1707  |           | R    | 1346.6600 | 1345.6648 |          | 1447.7553 | 1430.7288 |
| 4  | 70.0651  | 410.2874  | 393.2609  |                | 438.2823  | 421.2558  |                | 384.2718  |           | P    | 1249.6072 | 1248.6120 |          | 1291.6542 | 1274.6276 |
| 5  | 56.0495  | 493.3245  | 476.2980  |                | 521.3194  | 504.2929  |                | 481.3245  |           | M    | 1166.5701 | 1165.5749 |          | 1194.6014 | 1177.5749 |
| 6  | 136.0757 | 656.3879  | 639.3613  |                | 684.3828  | 667.3562  |                |           |           | Y    | 1003.5068 |           |          | 1111.5643 | 1094.5378 |
| 7  | 60.0444  | 743.4199  | 726.3933  | 725.4093       | 771.4148  | 754.3883  | 753.4042       | 727.4250  |           | S    | 916.4748  | 915.4795  |          | 948.5010  | 931.4744  |
| 8  | 87.0553  | 857.4628  | 840.4363  | 839.4522       | 885.4577  | 868.4312  | 867.4472       | 814.4570  |           | N    | 802.4318  | 801.4366  |          | 861.4690  | 844.4424  |
| 9  | 70.0651  | 954.5156  | 937.4890  | 936.5050       | 982.5105  | 965.4839  | 964.4999       | 928.4999  |           | P    | 705.3791  | 704.3838  |          | 747.4260  | 730.3995  |
| 10 | 70.0651  | 1051.5683 | 1034.5418 | 1033.5578      | 1079.5633 | 1062.5367 | 1061.5527      | 1025.5527 |           | P    | 608.3263  | 607.3311  |          | 650.3733  | 633.3467  |
| 11 | 86.0964  | 1164.6524 | 1147.6259 | 1146.6418      | 1192.6473 | 1175.6208 | 1174.6368      | 1136.6211 | 1150.6368 | I    | 495.2423  | 508.2627  | 522.2783 | 553.3205  | 536.2940  |
| 12 | 110.0713 | 1301.7113 | 1284.6848 | 1283.7008      | 1329.7062 | 1312.6797 | 1311.6957      |           |           | H    | 358.1833  |           |          | 440.2364  | 423.2099  |
| 13 | 30.0338  | 1358.7328 | 1341.7062 | 1340.7222      | 1386.7277 | 1369.7011 | 1368.7171      |           |           | G    |           |           |          | 303.1775  | 286.1510  |
| 14 | 44.0495  | 1429.7699 | 1412.7433 | 1411.7593      | 1457.7648 | 1440.7383 | 1439.7542      |           |           | A    | 230.1248  |           |          | 246.1561  | 229.1295  |
| 15 | 129.1135 |           |           |                |           |           |                |           |           | R    | 74.0237   | 73.0284   |          | 175.1190  | 158.0924  |

| Seq    | ya       | yb       | Seq    | ya       | yb       | Seq   | ya       | yb       |
|--------|----------|----------|--------|----------|----------|-------|----------|----------|
| AR     | 200.1506 | 228.1455 | ARP    | 297.2033 | 325.1983 | ARPM  | 380.2405 | 408.2354 |
| ARPMY  | 543.3038 | 571.2987 | ARPMYS | 630.3358 | 658.3307 | RP    | 226.1662 | 254.1612 |
| RPM    | 309.2034 | 337.1983 | RPMY   | 472.2667 | 500.2616 | RPMYS | 559.2987 | 587.2936 |
| RPMYSN | 673.3416 | 701.3365 | PM     | 153.1022 | 181.0972 | PMY   | 316.1656 | 344.1605 |

|         |          |          |        |          |          |        |          |          |
|---------|----------|----------|--------|----------|----------|--------|----------|----------|
| PMYS    | 403.1976 | 431.1925 | PMYSN  | 517.2405 | 545.2354 | PMYSNP | 614.2933 | 642.2882 |
| MY      | 219.1128 | 247.1077 | MYS    | 306.1448 | 334.1397 | MYSN   | 420.1878 | 448.1827 |
| MYSNP   | 517.2405 | 545.2354 | MYSNPP | 614.2933 | 642.2882 | YS     | 223.1077 | 251.1026 |
| YSN     | 337.1506 | 365.1456 | YSNP   | 434.2034 | 462.1983 | YSNPP  | 531.2562 | 559.2511 |
| YSNPPI  | 644.3402 | 672.3352 | SN     | 174.0873 | 202.0822 | SNP    | 271.1401 | 299.1350 |
| SNPP    | 368.1928 | 396.1878 | SNPPI  | 481.2769 | 509.2718 | SNPPIH | 618.3358 | 646.3307 |
| SNPPIHG | 675.3573 | 703.3522 | NP     | 184.1081 | 212.1030 | NPP    | 281.1608 | 309.1557 |
| NPPI    | 394.2449 | 422.2398 | NPPIH  | 531.3038 | 559.2987 | NPPIHG | 588.3253 | 616.3202 |
| NPPIHGA | 659.3624 | 687.3573 | PP     | 167.1179 | 195.1128 | PPI    | 280.2020 | 308.1969 |
| PPIH    | 417.2609 | 445.2558 | PPIHG  | 474.2823 | 502.2772 | PPIHGA | 545.3194 | 573.3144 |
| PI      | 183.1492 | 211.1441 | PIH    | 320.2081 | 348.2030 | PIHG   | 377.2296 | 405.2245 |
| PIHGA   | 448.2667 | 476.2616 | IH     | 223.1553 | 251.1503 | IHG    | 280.1768 | 308.1717 |
| IHGA    | 351.2139 | 379.2088 | HG     | 167.0927 | 195.0877 | HGA    | 238.1299 | 266.1248 |
| GA      | 101.0709 | 129.0659 |        |          |          |        |          |          |

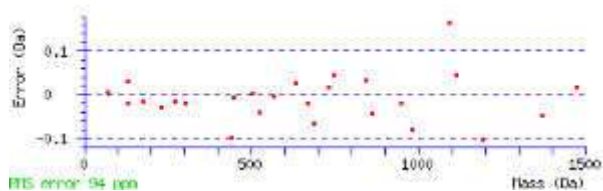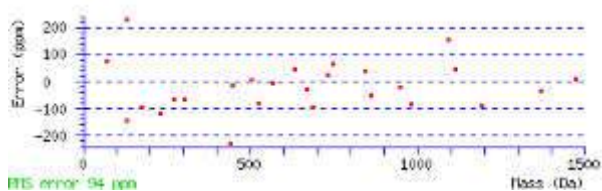

NCBI BLAST search of [LARPMYSNPPIHGAR](#)

(Parameters: blastp, nr protein database, expect=20000, no filter, PAM30)

Other BLAST [web gateways](#)

#### All matches to this query

| Score | Mr(calcd) | Delta   | Sequence                         |
|-------|-----------|---------|----------------------------------|
| 21.0  | 1694.8926 | 0.0874  | <a href="#">RALPHSLNTMVASIW</a>  |
| 12.5  | 1694.8675 | 0.1126  | <a href="#">LARPMYSNPPIHGAR</a>  |
| 12.5  | 1694.8675 | 0.1126  | <a href="#">LARPMYSNPPIHGAR</a>  |
| 11.5  | 1694.9540 | 0.0260  | <a href="#">RTAASGRPLTLPVSNR</a> |
| 11.0  | 1694.8199 | 0.1601  | <a href="#">GSHGMVYKGVLFNDR</a>  |
| 10.0  | 1694.8886 | 0.0914  | <a href="#">VGESLPLSATHLRCR</a>  |
| 10.0  | 1695.0043 | -0.0242 | <a href="#">VLDIAAIIITRTEKPR</a> |
| 9.7   | 1694.9540 | 0.0261  | <a href="#">YGAAAILLSNRPSDRR</a> |
| 9.6   | 1695.0043 | -0.0242 | <a href="#">RVTEALSSLALPLGLR</a> |
| 9.6   | 1694.9250 | 0.0551  | <a href="#">RAOLLIHEMAGLTSR</a>  |

Mascot: <http://www.matrixscience.com/>

**MATRIX SCIENCE Mascot Search Results**

**Peptide View Spot no 64**

MS/MS Fragmentation of **NIFNDAKVPWSEYR**

Found in **gi29468084** in **NCBI**nr, aspartate aminotransferase [Oryza sativa]

Match to Query 81: 1737.993624 from(1739.000900,1+) intensity(0.0000) index(23)  
 Title: Label: K7, Spot\_Id: 228948, Peak\_List\_Id: 257624, MSMS Job\_Run\_Id: 24928, Comment:  
 Data file ppw\_K7\_138985140200.txt

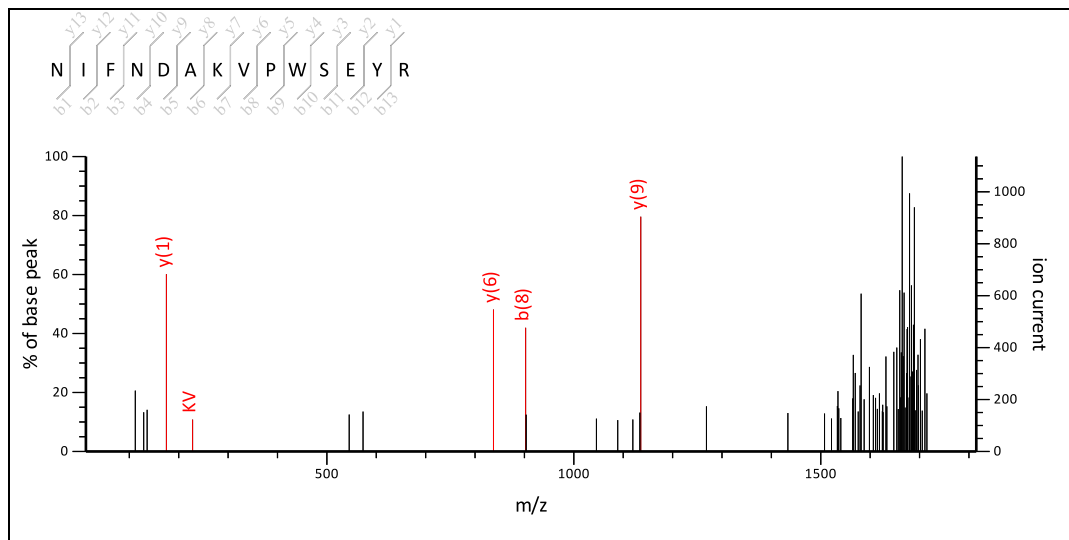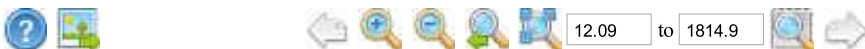

Label all possible matches  Label matches used for scoring

Monoisotopic mass of neutral peptide Mr(calc): 1737.8474  
 Fixed modifications: Carbamidomethyl (C) (apply to specified residues or termini only)  
 Ions Score: 5 Expect: 5.9e+02  
 Matches : 6/241 fragment ions using 19 most intense peaks ([help](#))

| #  | Immon.   | a         | a*        | a <sup>0</sup> | b               | b*        | b <sup>0</sup> | d         | d'       | Seq. | v         | w         | w'        | y                | y*        |
|----|----------|-----------|-----------|----------------|-----------------|-----------|----------------|-----------|----------|------|-----------|-----------|-----------|------------------|-----------|
| 1  | 87.0553  | 87.0553   | 70.0287   |                | 115.0502        | 98.0237   |                | 44.0495   |          | N    |           |           |           |                  |           |
| 2  | 86.0964  | 200.1394  | 183.1128  |                | <b>228.1343</b> | 211.1077  |                | 172.1081  | 186.1237 | I    | 1566.7336 | 1579.7540 | 1593.7696 | 1624.8118        | 1607.7853 |
| 3  | 120.0808 | 347.2078  | 330.1812  |                | 375.2027        | 358.1761  |                |           |          | F    | 1419.6652 |           |           | 1511.7278        | 1494.7012 |
| 4  | 87.0553  | 461.2507  | 444.2241  |                | 489.2456        | 472.2191  |                | 418.2449  |          | N    | 1305.6222 | 1304.6270 |           | 1364.6593        | 1347.6328 |
| 5  | 88.0393  | 576.2776  | 559.2511  | 558.2671       | 604.2726        | 587.2460  | 586.2620       | 532.2878  |          | D    | 1190.5953 | 1189.6000 |           | 1250.6164        | 1233.5899 |
| 6  | 44.0495  | 647.3148  | 630.2882  | 629.3042       | 675.3097        | 658.2831  | 657.2991       |           |          | A    | 1119.5582 |           |           | <b>1135.5895</b> | 1118.5629 |
| 7  | 101.1073 | 775.4097  | 758.3832  | 757.3991       | 803.4046        | 786.3781  | 785.3941       | 718.3519  |          | K    | 991.4632  | 990.4680  |           | 1064.5524        | 1047.5258 |
| 8  | 72.0808  | 874.4781  | 857.4516  | 856.4676       | <b>902.4730</b> | 885.4465  | 884.4625       | 860.4625  |          | V    | 892.3948  | 905.4152  |           | 936.4574         | 919.4308  |
| 9  | 70.0651  | 971.5309  | 954.5043  | 953.5203       | 999.5258        | 982.4993  | 981.5152       | 945.5152  |          | P    | 795.3420  | 794.3468  |           | <b>837.3890</b>  | 820.3624  |
| 10 | 159.0917 | 1157.6102 | 1140.5837 | 1139.5996      | 1185.6051       | 1168.5786 | 1167.5946      |           |          | W    | 609.2627  |           |           | 740.3362         | 723.3097  |
| 11 | 60.0444  | 1244.6422 | 1227.6157 | 1226.6317      | 1272.6371       | 1255.6106 | 1254.6266      | 1228.6473 |          | S    | 522.2307  | 521.2354  |           | 554.2569         | 537.2304  |
| 12 | 102.0550 | 1373.6848 | 1356.6583 | 1355.6743      | 1401.6797       | 1384.6532 | 1383.6692      | 1315.6793 |          | E    | 393.1881  | 392.1928  |           | 467.2249         | 450.1983  |
| 13 | 136.0757 | 1536.7482 | 1519.7216 | 1518.7376      | 1564.7431       | 1547.7165 | 1546.7325      |           |          | Y    | 230.1248  |           |           | 338.1823         | 321.1557  |
| 14 | 129.1135 |           |           |                |                 |           |                |           |          | R    | 74.0237   | 73.0284   |           | <b>175.1190</b>  | 158.0924  |

| Seq    | ya       | yb       | Seq    | ya       | yb       | Seq    | ya       | yb       |
|--------|----------|----------|--------|----------|----------|--------|----------|----------|
| IF     | 233.1648 | 261.1598 | IFN    | 347.2078 | 375.2027 | IFND   | 462.2347 | 490.2296 |
| IFNDA  | 533.2718 | 561.2667 | IFNDAK | 661.3668 | 689.3617 | FN     | 234.1237 | 262.1186 |
| FND    | 349.1506 | 377.1456 | FNDA   | 420.1878 | 448.1827 | FNDAK  | 548.2827 | 576.2776 |
| FNDAKV | 647.3511 | 675.3461 | ND     | 202.0822 | 230.0771 | NDA    | 273.1193 | 301.1143 |
| NDAK   | 401.2143 | 429.2092 | NDAKV  | 500.2827 | 528.2776 | NDAKVP | 597.3355 | 625.3304 |
| DA     | 159.0764 | 187.0713 | DAK    | 287.1714 | 315.1663 | DAKV   | 386.2398 | 414.2347 |

|                        |          |          |                        |          |                          |                        |          |          |
|------------------------|----------|----------|------------------------|----------|--------------------------|------------------------|----------|----------|
| <a href="#">DAKVP</a>  | 483.2926 | 511.2875 | <a href="#">DAKVPW</a> | 669.3719 | 697.3668                 | <a href="#">AK</a>     | 172.1444 | 200.1394 |
| <a href="#">AKV</a>    | 271.2129 | 299.2078 | <a href="#">AKVP</a>   | 368.2656 | 396.2605                 | <a href="#">AKVPW</a>  | 554.3449 | 582.3398 |
| <a href="#">AKVPWS</a> | 641.3770 | 669.3719 | <a href="#">KV</a>     | 200.1757 | <a href="#">228.1707</a> | <a href="#">KVP</a>    | 297.2285 | 325.2234 |
| <a href="#">KVPW</a>   | 483.3078 | 511.3027 | <a href="#">KVPWS</a>  | 570.3398 | 598.3348                 | <a href="#">KVPWSE</a> | 699.3824 | 727.3774 |
| <a href="#">VP</a>     | 169.1335 | 197.1285 | <a href="#">VPW</a>    | 355.2129 | 383.2078                 | <a href="#">VPWS</a>   | 442.2449 | 470.2398 |
| <a href="#">VPWSE</a>  | 571.2875 | 599.2824 | <a href="#">PW</a>     | 256.1444 | 284.1394                 | <a href="#">PWS</a>    | 343.1765 | 371.1714 |
| <a href="#">PWSE</a>   | 472.2191 | 500.2140 | <a href="#">PWSEY</a>  | 635.2824 | 663.2773                 | <a href="#">WS</a>     | 246.1237 | 274.1186 |
| <a href="#">WSE</a>    | 375.1663 | 403.1612 | <a href="#">WSEY</a>   | 538.2296 | 566.2245                 | <a href="#">SE</a>     | 189.0870 | 217.0819 |
| <a href="#">SEY</a>    | 352.1503 | 380.1452 | <a href="#">EY</a>     | 265.1183 | 293.1132                 |                        |          |          |

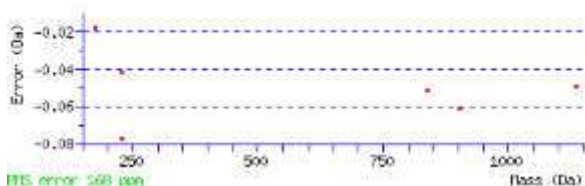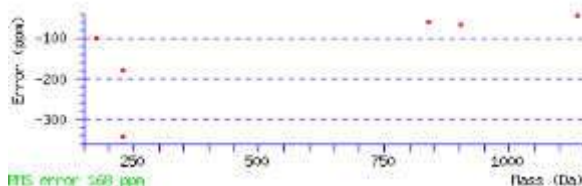

NCBI BLAST search of [NIFENDAKVPWSEYR](#)

(Parameters: blastp, nr protein database, expect=20000, no filter, PAM30)

Other BLAST [web gateways](#)

#### All matches to this query

| Score | Mr(calc)  | Delta  | Sequence                          |
|-------|-----------|--------|-----------------------------------|
| 8.9   | 1737.8435 | 0.1502 | <a href="#">HADFIGPVQVADAGEGR</a> |
| 5.5   | 1737.8257 | 0.1680 | <a href="#">QMVVARSNWEAFER</a>    |
| 5.5   | 1737.8533 | 0.1403 | <a href="#">QSETTGIOVYSQIER</a>   |
| 4.9   | 1737.8463 | 0.1473 | <a href="#">QVTMDLITCILEMR</a>    |
| 4.5   | 1737.8474 | 0.1462 | <a href="#">NIFENDAKVPWSEYR</a>   |
| 3.9   | 1737.9058 | 0.0878 | <a href="#">QMKISAMTLLHFFER</a>   |
| 3.5   | 1737.8798 | 0.1138 | <a href="#">GWLDTTYLSRSGNIR</a>   |
| 3.5   | 1737.8798 | 0.1138 | <a href="#">GWLDTTYLSRSGNLR</a>   |
| 3.3   | 1737.8291 | 0.1646 | <a href="#">KVNYVICTMSGSHSR</a>   |
| 3.3   | 1737.8621 | 0.1316 | <a href="#">OLGGVMAYPSYARGR</a>   |

Mascot: <http://www.matrixscience.com/>

**MATRIX SCIENCE Mascot Search Results**

**Peptide View Spot no 66**

MS/MS Fragmentation of **HDLHISAYGEGNER**

Found in **gi|19387272** in **NCBI**nr, putative precursor chloroplastic glutamine synthetase [Oryza sativa Japonica Group]

Match to Query 69: 1596.843724 from(1597.851000,1+) intensity(0.0000) index(20)  
 Title: Label: C8, Spot\_Id: 228956, Peak\_List\_Id: 257807, MSMS Job\_Run\_Id: 24936, Comment:  
 Data file ppw\_C8\_138985146000.txt

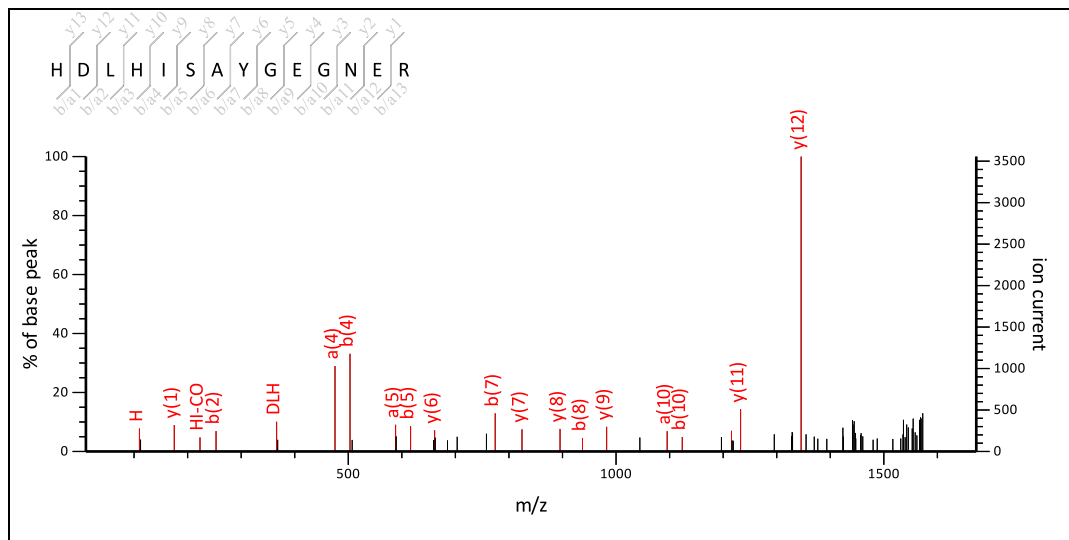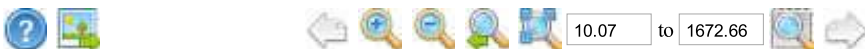

Label all possible matches  Label matches used for scoring

Monoisotopic mass of neutral peptide Mr(calc): 1596.7281  
 Fixed modifications: Carbamidomethyl (C) (apply to specified residues or termini only)  
 Ions Score: 65 Expect: 0.00069  
 Matches : 26/230 fragment ions using 30 most intense peaks ([help](#))

| #  | Immon.   | a         | a*        | a <sup>0</sup> | b         | b*        | b <sup>0</sup> | d         | d'       | Seq. | v         | w         | w'        | y         | y*        |
|----|----------|-----------|-----------|----------------|-----------|-----------|----------------|-----------|----------|------|-----------|-----------|-----------|-----------|-----------|
| 1  | 110.0713 | 110.0713  |           |                | 138.0662  |           |                | 44.0495   |          | H    |           |           |           |           |           |
| 2  | 88.0393  | 225.0982  |           | 207.0877       | 253.0931  |           | 235.0826       | 181.1084  |          | D    | 1400.6553 | 1399.6601 |           | 1460.6764 | 1443.6499 |
| 3  | 86.0964  | 338.1823  |           | 320.1717       | 366.1772  |           | 348.1666       | 296.1353  |          | L    | 1287.5713 | 1286.5760 |           | 1345.6495 | 1328.6230 |
| 4  | 110.0713 | 475.2412  |           | 457.2306       | 503.2361  |           | 485.2255       |           |          | H    | 1150.5123 |           |           | 1232.5654 | 1215.5389 |
| 5  | 86.0964  | 588.3253  |           | 570.3147       | 616.3202  |           | 598.3096       | 560.2940  | 574.3096 | I    | 1037.4283 | 1050.4487 | 1064.4643 | 1095.5065 | 1078.4800 |
| 6  | 60.0444  | 675.3573  |           | 657.3467       | 703.3522  |           | 685.3416       | 659.3624  |          | S    | 950.3963  | 949.4010  |           | 982.4225  | 965.3959  |
| 7  | 44.0495  | 746.3944  |           | 728.3838       | 774.3893  |           | 756.3787       |           |          | A    | 879.3591  |           |           | 895.3904  | 878.3639  |
| 8  | 136.0757 | 909.4577  |           | 891.4472       | 937.4526  |           | 919.4421       |           |          | Y    | 716.2958  |           |           | 824.3533  | 807.3268  |
| 9  | 30.0338  | 966.4792  |           | 948.4686       | 994.4741  |           | 976.4635       |           |          | G    |           |           |           | 661.2900  | 644.2634  |
| 10 | 102.0550 | 1095.5218 |           | 1077.5112      | 1123.5167 |           | 1105.5061      | 1037.5163 |          | E    | 530.2317  | 529.2365  |           | 604.2685  | 587.2420  |
| 11 | 30.0338  | 1152.5432 |           | 1134.5327      | 1180.5382 |           | 1162.5276      |           |          | G    |           |           |           | 475.2259  | 458.1994  |
| 12 | 87.0553  | 1266.5862 | 1249.5596 | 1248.5756      | 1294.5811 | 1277.5545 | 1276.5705      | 1223.5804 |          | N    | 359.1674  | 358.1721  |           | 418.2045  | 401.1779  |
| 13 | 102.0550 | 1395.6288 | 1378.6022 | 1377.6182      | 1423.6237 | 1406.5971 | 1405.6131      | 1337.6233 |          | E    | 230.1248  | 229.1295  |           | 304.1615  | 287.1350  |
| 14 | 129.1135 |           |           |                |           |           |                |           |          | R    | 74.0237   | 73.0284   |           | 175.1190  | 158.0924  |

| Seq    | ya       | yb       | Seq    | ya       | yb       | Seq     | ya       | yb       |
|--------|----------|----------|--------|----------|----------|---------|----------|----------|
| DL     | 201.1234 | 229.1183 | DLH    | 338.1823 | 366.1772 | DLHI    | 451.2663 | 479.2613 |
| DLHIS  | 538.2984 | 566.2933 | DLHISA | 609.3355 | 637.3304 | LH      | 223.1553 | 251.1503 |
| LHI    | 336.2394 | 364.2343 | LHIS   | 423.2714 | 451.2663 | LHISA   | 494.3085 | 522.3035 |
| LHISAY | 657.3719 | 685.3668 | HI     | 223.1553 | 251.1503 | HIS     | 310.1874 | 338.1823 |
| HISA   | 381.2245 | 409.2194 | HISAY  | 544.2878 | 572.2827 | HISAYG  | 601.3093 | 629.3042 |
| IS     | 173.1285 | 201.1234 | ISA    | 244.1656 | 272.1605 | ISAY    | 407.2289 | 435.2238 |
| ISAYG  | 464.2504 | 492.2453 | ISAYGE | 593.2930 | 621.2879 | ISAYGEG | 650.3144 | 678.3093 |

|       |          |          |        |          |          |         |          |          |
|-------|----------|----------|--------|----------|----------|---------|----------|----------|
| SA    | 131.0815 | 159.0764 | SAY    | 294.1448 | 322.1397 | SAYG    | 351.1663 | 379.1612 |
| SAYGE | 480.2089 | 508.2038 | SAYGEG | 537.2304 | 565.2253 | SAYGEGN | 651.2733 | 679.2682 |
| AY    | 207.1128 | 235.1077 | AYG    | 264.1343 | 292.1292 | AYGE    | 393.1769 | 421.1718 |
| AYGEG | 450.1983 | 478.1932 | AYGEGN | 564.2413 | 592.2362 | AYGEGNE | 693.2838 | 721.2788 |
| YG    | 193.0972 | 221.0921 | YGE    | 322.1397 | 350.1347 | YGEG    | 379.1612 | 407.1561 |
| YGEGN | 493.2041 | 521.1991 | YGEGNE | 622.2467 | 650.2416 | GE      | 159.0764 | 187.0713 |
| GEG   | 216.0979 | 244.0928 | GEGN   | 330.1408 | 358.1357 | GEGNE   | 459.1834 | 487.1783 |
| EG    | 159.0764 | 187.0713 | EGN    | 273.1193 | 301.1143 | EGNE    | 402.1619 | 430.1569 |
| GN    | 144.0768 | 172.0717 | GNE    | 273.1193 | 301.1143 | NE      | 216.0979 | 244.0928 |

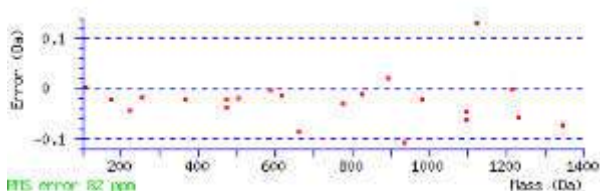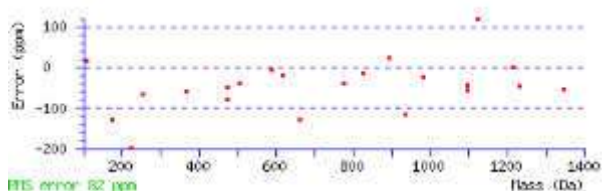

NCBI BLAST search of [HDLHISAYGEGNER](#)

(Parameters: blastp, nr protein database, expect=20000, no filter, PAM30)

Other BLAST [web gateways](#)

#### All matches to this query

| Score | Mr(calc)  | Delta   | Sequence                        |
|-------|-----------|---------|---------------------------------|
| 65.1  | 1596.7281 | 0.1157  | <a href="#">HDLHISAYGEGNER</a>  |
| 48.5  | 1596.7281 | 0.1157  | <a href="#">HEVHISAYGEGNER</a>  |
| 48.5  | 1596.7281 | 0.1157  | <a href="#">HVEHISAYGEGNER</a>  |
| 35.9  | 1596.7644 | 0.0793  | <a href="#">HVEHISSYGLGNER</a>  |
| 16.6  | 1596.8004 | 0.0434  | <a href="#">SFMVECEVLKSIR</a>   |
| 11.5  | 1596.7566 | 0.0871  | <a href="#">VGFTQTTCDLATOR</a>  |
| 10.1  | 1596.7678 | 0.0759  | <a href="#">RMAAGLNGFSSVSER</a> |
| 9.9   | 1596.7049 | 0.1388  | <a href="#">MENQLSSSSEAASTR</a> |
| 9.5   | 1596.8493 | -0.0056 | <a href="#">RCWLLPIARPCR</a>    |
| 8.6   | 1596.7177 | 0.1260  | <a href="#">AKQMWSMDLNWR</a>    |

Mascot: <http://www.matrixscience.com/>

**MATRIX SCIENCE Mascot Search Results**

**Peptide View Spot no 66**

MS/MS Fragmentation of **LTGLHETASIDNFSWGVANR**

Found in **gi|19387272** in **NCBI**nr, putative precursor chloroplastic glutamine synthetase [Oryza sativa Japonica Group]

Match to Query 83: 2187.221024 from(2188.228300,1+) intensity(0.0000) index(24)  
 Title: Label: C8, Spot\_Id: 228956, Peak\_List\_Id: 257806, MSMS Job\_Run\_Id: 24936, Comment:  
 Data file ppw\_C8\_138985146000.txt

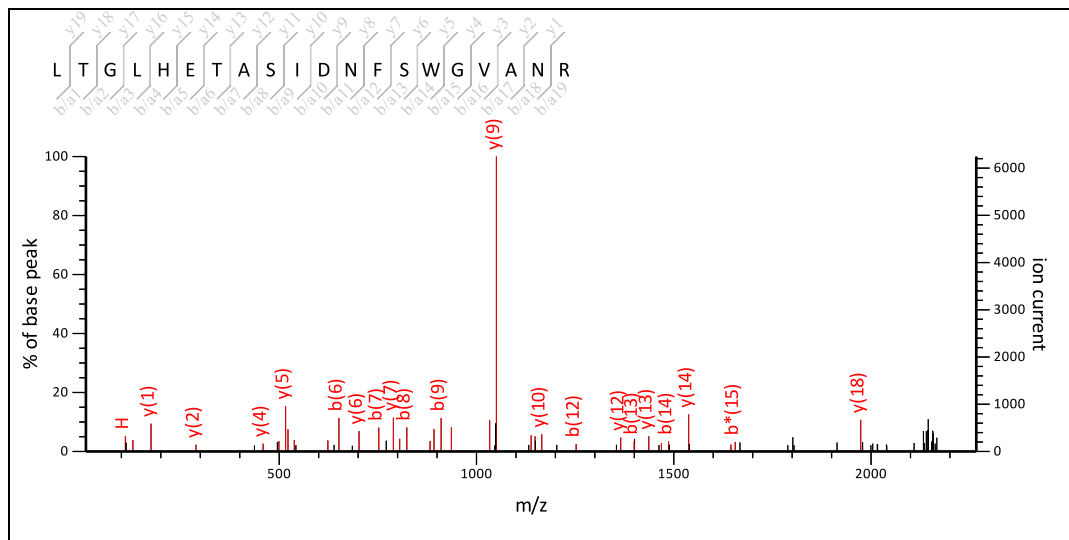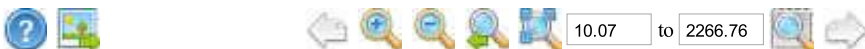

Label all possible matches  Label matches used for scoring

Monoisotopic mass of neutral peptide Mr(calc): 2187.0709  
 Fixed modifications: Carbamidomethyl (C) (apply to specified residues or termini only)  
 Ions Score: 96 Expect: 3.5e-07  
 Matches : 37/358 fragment ions using 51 most intense peaks ([help](#))

| #  | Immon.   | a         | a*        | a <sup>0</sup> | b         | b*        | b <sup>0</sup> | d         | d'       | Seq. | v         | w         | w'        | y         | y*        |
|----|----------|-----------|-----------|----------------|-----------|-----------|----------------|-----------|----------|------|-----------|-----------|-----------|-----------|-----------|
| 1  | 86.0964  | 86.0964   |           |                | 114.0913  |           |                | 44.0495   |          | L    |           |           |           |           |           |
| 2  | 74.0600  | 187.1441  |           | 169.1335       | 215.1390  |           | 197.1285       | 171.1492  | 173.1285 | T    | 2028.9522 | 2041.9726 | 2043.9519 | 2074.9941 | 2057.9675 |
| 3  | 30.0338  | 244.1656  |           | 226.1550       | 272.1605  |           | 254.1499       |           |          | G    |           |           |           | 1973.9464 | 1956.9199 |
| 4  | 86.0964  | 357.2496  |           | 339.2391       | 385.2445  |           | 367.2340       | 315.2027  |          | L    | 1858.8467 | 1857.8515 |           | 1916.9250 | 1899.8984 |
| 5  | 110.0713 | 494.3085  |           | 476.2980       | 522.3035  |           | 504.2929       |           |          | H    | 1721.7878 |           |           | 1803.8409 | 1786.8143 |
| 6  | 102.0550 | 623.3511  |           | 605.3406       | 651.3461  |           | 633.3355       | 565.3457  |          | E    | 1592.7452 | 1591.7499 |           | 1666.7820 | 1649.7554 |
| 7  | 74.0600  | 724.3988  |           | 706.3883       | 752.3937  |           | 734.3832       | 708.4039  | 710.3832 | T    | 1491.6975 | 1504.7179 | 1506.6972 | 1537.7394 | 1520.7128 |
| 8  | 44.0495  | 795.4359  |           | 777.4254       | 823.4308  |           | 805.4203       |           |          | A    | 1420.6604 |           |           | 1436.6917 | 1419.6652 |
| 9  | 60.0444  | 882.4680  |           | 864.4574       | 910.4629  |           | 892.4523       | 866.4730  |          | S    | 1333.6284 | 1332.6331 |           | 1365.6546 | 1348.6280 |
| 10 | 86.0964  | 995.5520  |           | 977.5415       | 1023.5469 |           | 1005.5364      | 967.5207  | 981.5364 | I    | 1220.5443 | 1233.5647 | 1247.5804 | 1278.6226 | 1261.5960 |
| 11 | 88.0393  | 1110.5790 |           | 1092.5684      | 1138.5739 |           | 1120.5633      | 1066.5891 |          | D    | 1105.5174 | 1104.5221 |           | 1165.5385 | 1148.5119 |
| 12 | 87.0553  | 1224.6219 | 1207.5953 | 1206.6113      | 1252.6168 | 1235.5903 | 1234.6062      | 1181.6161 |          | N    | 991.4744  | 990.4792  |           | 1050.5116 | 1033.4850 |
| 13 | 120.0808 | 1371.6903 | 1354.6638 | 1353.6797      | 1399.6852 | 1382.6587 | 1381.6747      |           |          | F    | 844.4060  |           |           | 936.4686  | 919.4421  |
| 14 | 60.0444  | 1458.7223 | 1441.6958 | 1440.7118      | 1486.7172 | 1469.6907 | 1468.7067      | 1442.7274 |          | S    | 757.3740  | 756.3787  |           | 789.4002  | 772.3737  |
| 15 | 159.0917 | 1644.8016 | 1627.7751 | 1626.7911      | 1672.7966 | 1655.7700 | 1654.7860      |           |          | W    | 571.2947  |           |           | 702.3682  | 685.3416  |
| 16 | 30.0338  | 1701.8231 | 1684.7966 | 1683.8125      | 1729.8180 | 1712.7915 | 1711.8075      |           |          | G    |           |           |           | 516.2889  | 499.2623  |
| 17 | 72.0808  | 1800.8915 | 1783.8650 | 1782.8810      | 1828.8864 | 1811.8599 | 1810.8759      | 1786.8759 |          | V    | 415.2048  | 428.2252  |           | 459.2674  | 442.2409  |
| 18 | 44.0495  | 1871.9286 | 1854.9021 | 1853.9181      | 1899.9236 | 1882.8970 | 1881.9130      |           |          | A    | 344.1677  |           |           | 360.1990  | 343.1724  |
| 19 | 87.0553  | 1985.9716 | 1968.9450 | 1967.9610      | 2013.9665 | 1996.9399 | 1995.9559      | 1942.9658 |          | N    | 230.1248  | 229.1295  |           | 289.1619  | 272.1353  |
| 20 | 129.1135 |           |           |                |           |           |                |           |          | R    | 74.0237   | 73.0284   |           | 175.1190  | 158.0924  |

| Seq | ya       | yb       | Seq | ya       | yb       | Seq  | ya       | yb       |
|-----|----------|----------|-----|----------|----------|------|----------|----------|
| TG  | 131.0815 | 159.0764 | TGL | 244.1656 | 272.1605 | TGLH | 381.2245 | 409.2194 |



|        |          |          |        |          |          |         |          |          |
|--------|----------|----------|--------|----------|----------|---------|----------|----------|
| TGLHE  | 510.2671 | 538.2620 | TGLHET | 611.3148 | 639.3097 | TGLHETA | 682.3519 | 710.3468 |
| GL     | 143.1179 | 171.1128 | GLH    | 280.1768 | 308.1717 | GLHE    | 409.2194 | 437.2143 |
| GLHET  | 510.2671 | 538.2620 | GLHETA | 581.3042 | 609.2991 | GLHETAS | 668.3362 | 696.3311 |
| LH     | 223.1553 | 251.1503 | LHE    | 352.1979 | 380.1928 | LHET    | 453.2456 | 481.2405 |
| LHETA  | 524.2827 | 552.2776 | LHETAS | 611.3148 | 639.3097 | HE      | 239.1139 | 267.1088 |
| HET    | 340.1615 | 368.1565 | HETA   | 411.1987 | 439.1936 | HETAS   | 498.2307 | 526.2256 |
| HETASI | 611.3148 | 639.3097 | ET     | 203.1026 | 231.0975 | ETA     | 274.1397 | 302.1347 |
| ETAS   | 361.1718 | 389.1667 | ETASI  | 474.2558 | 502.2508 | ETASID  | 589.2828 | 617.2777 |
| TA     | 145.0972 | 173.0921 | TAS    | 232.1292 | 260.1241 | TASI    | 345.2132 | 373.2082 |
| TASID  | 460.2402 | 488.2351 | TASIDN | 574.2831 | 602.2780 | AS      | 131.0815 | 159.0764 |
| ASI    | 244.1656 | 272.1605 | ASID   | 359.1925 | 387.1874 | ASIDN   | 473.2354 | 501.2304 |
| ASIDNF | 620.3039 | 648.2988 | SI     | 173.1285 | 201.1234 | SID     | 288.1554 | 316.1503 |
| SIDN   | 402.1983 | 430.1932 | SIDNF  | 549.2667 | 577.2617 | SIDNFS  | 636.2988 | 664.2937 |
| ID     | 201.1234 | 229.1183 | IDN    | 315.1663 | 343.1612 | IDNF    | 462.2347 | 490.2296 |
| IDNFS  | 549.2667 | 577.2617 | DN     | 202.0822 | 230.0771 | DNF     | 349.1506 | 377.1456 |
| DNFS   | 436.1827 | 464.1776 | DNFSW  | 622.2620 | 650.2569 | DNFSWG  | 679.2835 | 707.2784 |
| NF     | 234.1237 | 262.1186 | NFS    | 321.1557 | 349.1506 | NFSW    | 507.2350 | 535.2300 |
| NFSWG  | 564.2565 | 592.2514 | NFSWGV | 663.3249 | 691.3198 | FS      | 207.1128 | 235.1077 |
| FSW    | 393.1921 | 421.1870 | FSWG   | 450.2136 | 478.2085 | FSWGV   | 549.2820 | 577.2769 |
| FSWGVA | 620.3191 | 648.3140 | SW     | 246.1237 | 274.1186 | SWG     | 303.1452 | 331.1401 |
| SWG    | 402.2136 | 430.2085 | SWGVA  | 473.2507 | 501.2456 | SWGVA   | 587.2936 | 615.2885 |
| WG     | 216.1131 | 244.1081 | WGV    | 315.1816 | 343.1765 | WGVA    | 386.2187 | 414.2136 |
| WGVAN  | 500.2616 | 528.2565 | GV     | 129.1022 | 157.0972 | GVA     | 200.1394 | 228.1343 |
| GVAN   | 314.1823 | 342.1772 | VA     | 143.1179 | 171.1128 | VAN     | 257.1608 | 285.1557 |
| AN     | 158.0924 | 186.0873 |        |          |          |         |          |          |

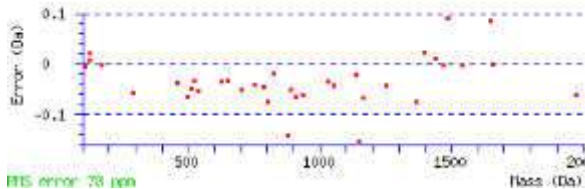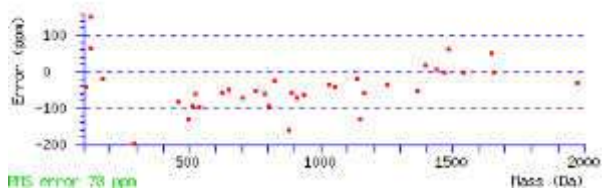

NCBI BLAST search of [LTGLHETASIDNFSWGVANR](#)  
 (Parameters: blastp, nr protein database, expect=20000, no filter, PAM30)  
 Other BLAST [web gateways](#)

All matches to this query

| Score | Mr(calcd) | Delta  | Sequence                                 |
|-------|-----------|--------|------------------------------------------|
| 96.0  | 2187.0709 | 0.1501 | <a href="#">LTGLHETASIDNFSWGVANR</a>     |
| 19.1  | 2187.0789 | 0.1421 | <a href="#">LRHNCAAVOMPIGLEGEHR</a>      |
| 10.7  | 2187.1834 | 0.0376 | <a href="#">IGVVAAVATATLAAFGCVGAVGGR</a> |
| 10.4  | 2187.0637 | 0.1573 | <a href="#">FFLENPENFDTLVVFNRR</a>       |
| 9.4   | 2187.0266 | 0.1944 | <a href="#">QMSSPTFLDDATGIGEPLHR</a>     |
| 8.9   | 2187.0392 | 0.1818 | <a href="#">CGAHLGFGYDDTAAARRPPR</a>     |
| 8.9   | 2187.0565 | 0.1646 | <a href="#">KVHCALANLDSMYVTNHK</a>       |
| 7.2   | 2187.0169 | 0.2041 | <a href="#">MLEGTRALSHLLCSCHMR</a>       |
| 7.2   | 2187.0533 | 0.1677 | <a href="#">MLIGTRALSHLLCSCHMR</a>       |
| 7.2   | 2187.0533 | 0.1677 | <a href="#">MLLIGTRALSHLLCSCHMR</a>      |

Mascot: <http://www.matrixscience.com/>

**MATRIX SCIENCE Mascot Search Results**

**Peptide View Spot no 66**

MS/MS Fragmentation of **VVSQVPWFGIEQYETLLQR**

Found in **gi|19387272** in **NCBI**nr, putative precursor chloroplastic glutamine synthetase [Oryza sativa Japonica Group]

Match to Query 86: 2291.353824 from(2292.361100,1+) intensity(0.0000) index(25)  
 Title: Label: C8, Spot\_Id: 228956, Peak\_List\_Id: 257805, MSMS Job\_Run\_Id: 24936, Comment:  
 Data file ppw\_C8\_138985146000.txt

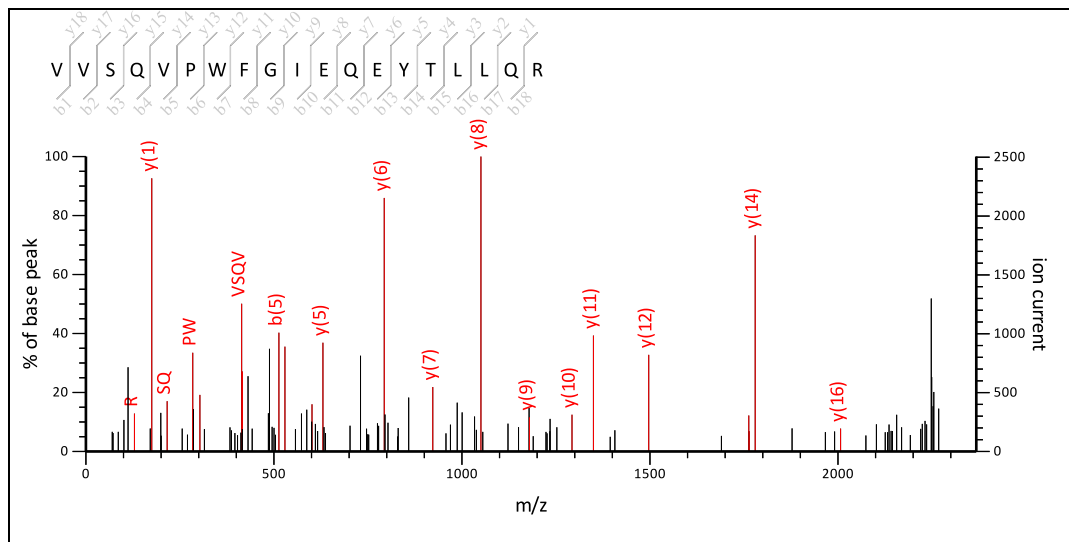

Navigation icons: Home, Back, Forward, Search, etc. Range: 0 to 2367.85

Label all possible matches  Label matches used for scoring

Monoisotopic mass of neutral peptide Mr(calc): 2291.1950  
 Fixed modifications: Carbamidomethyl (C) (apply to specified residues or termini only)  
 Ions Score: 98 Expect: 1.3e-07  
 Matches : 25/338 fragment ions using 40 most intense peaks ([help](#))

| #  | Immon.          | a         | a*        | a <sup>0</sup> | b                | b*        | b <sup>0</sup> | d         | d'        | Seq. | v         | w         | w'        | y                | y*               |
|----|-----------------|-----------|-----------|----------------|------------------|-----------|----------------|-----------|-----------|------|-----------|-----------|-----------|------------------|------------------|
| 1  | 72.0808         | 72.0808   |           |                | 100.0757         |           |                | 44.0495   |           | V    |           |           |           |                  |                  |
| 2  | 72.0808         | 171.1492  |           |                | 199.1441         |           |                | 157.1335  |           | V    | 2149.0713 | 2162.0917 |           | 2193.1339        | 2176.1073        |
| 3  | 60.0444         | 258.1812  |           | 240.1707       | 286.1761         |           | 268.1656       | 242.1863  |           | S    | 2062.0393 | 2061.0440 |           | 2094.0655        | 2077.0389        |
| 4  | 101.0709        | 386.2398  | 369.2132  | 368.2292       | <b>414.2347</b>  | 397.2082  | 396.2241       | 329.2183  |           | Q    | 1933.9807 | 1932.9854 |           | <b>2007.0334</b> | 1990.0069        |
| 5  | 72.0808         | 485.3082  | 468.2817  | 467.2976       | <b>513.3031</b>  | 496.2766  | 495.2926       | 471.2926  |           | V    | 1834.9123 | 1847.9327 |           | 1878.9749        | 1861.9483        |
| 6  | 70.0651         | 582.3610  | 565.3344  | 564.3504       | 610.3559         | 593.3293  | 592.3453       | 556.3453  |           | P    | 1737.8595 | 1736.8643 |           | <b>1779.9064</b> | <b>1762.8799</b> |
| 7  | 159.0917        | 768.4403  | 751.4137  | 750.4297       | 796.4352         | 779.4087  | 778.4246       |           |           | W    | 1551.7802 |           |           | 1682.8537        | 1665.8271        |
| 8  | 120.0808        | 915.5087  | 898.4822  | 897.4981       | 943.5036         | 926.4771  | 925.4930       |           |           | F    | 1404.7118 |           |           | <b>1496.7744</b> | 1479.7478        |
| 9  | 30.0338         | 972.5302  | 955.5036  | 954.5196       | 1000.5251        | 983.4985  | 982.5145       |           |           | G    |           |           |           | <b>1349.7060</b> | 1332.6794        |
| 10 | 86.0964         | 1085.6142 | 1068.5877 | 1067.6037      | 1113.6091        | 1096.5826 | 1095.5986      | 1057.5829 | 1071.5986 | I    | 1234.6062 | 1247.6266 | 1261.6423 | <b>1292.6845</b> | 1275.6579        |
| 11 | 102.0550        | 1214.6568 | 1197.6303 | 1196.6463      | 1242.6517        | 1225.6252 | 1224.6412      | 1156.6513 |           | E    | 1105.5637 | 1104.5684 |           | <b>1179.6004</b> | 1162.5739        |
| 12 | 101.0709        | 1342.7154 | 1325.6889 | 1324.7048      | 1370.7103        | 1353.6838 | 1352.6997      | 1285.6939 |           | Q    | 977.5051  | 976.5098  |           | <b>1050.5578</b> | 1033.5313        |
| 13 | 102.0550        | 1471.7580 | 1454.7314 | 1453.7474      | 1499.7529        | 1482.7264 | 1481.7423      | 1413.7525 |           | E    | 848.4625  | 847.4672  |           | <b>922.4993</b>  | 905.4727         |
| 14 | 136.0757        | 1634.8213 | 1617.7948 | 1616.8108      | 1662.8162        | 1645.7897 | 1644.8057      |           |           | Y    | 685.3992  |           |           | <b>793.4567</b>  | 776.4301         |
| 15 | 74.0600         | 1735.8690 | 1718.8425 | 1717.8584      | <b>1763.8639</b> | 1746.8374 | 1745.8534      | 1719.8741 | 1721.8534 | T    | 584.3515  | 597.3719  | 599.3511  | <b>630.3933</b>  | 613.3668         |
| 16 | 86.0964         | 1848.9531 | 1831.9265 | 1830.9425      | 1876.9480        | 1859.9214 | 1858.9374      | 1806.9061 |           | L    | 471.2674  | 470.2722  |           | <b>529.3457</b>  | 512.3191         |
| 17 | 86.0964         | 1962.0371 | 1945.0106 | 1944.0266      | 1990.0320        | 1973.0055 | 1972.0215      | 1919.9902 |           | L    | 358.1833  | 357.1881  |           | <b>416.2616</b>  | 399.2350         |
| 18 | 101.0709        | 2090.0957 | 2073.0692 | 2072.0851      | 2118.0906        | 2101.0641 | 2100.0801      | 2033.0742 |           | Q    | 230.1248  | 229.1295  |           | <b>303.1775</b>  | 286.1510         |
| 19 | <b>129.1135</b> |           |           |                |                  |           |                |           |           | R    | 74.0237   | 73.0284   |           | <b>175.1190</b>  | 158.0924         |

| Seq   | ya       | yb       | Seq    | ya       | yb       | Seq  | ya       | yb              |
|-------|----------|----------|--------|----------|----------|------|----------|-----------------|
| VS    | 159.1128 | 187.1077 | VSQ    | 287.1714 | 315.1663 | VSQV | 386.2398 | <b>414.2347</b> |
| VSQVP | 483.2926 | 511.2875 | VSQVPW | 669.3719 | 697.3668 | SQ   | 188.1030 | <b>216.0979</b> |

|                        |                 |          |                        |          |                 |                       |                 |          |
|------------------------|-----------------|----------|------------------------|----------|-----------------|-----------------------|-----------------|----------|
| <a href="#">SQV</a>    | 287.1714        | 315.1663 | <a href="#">SQVP</a>   | 384.2241 | 412.2191        | <a href="#">SQVPW</a> | 570.3035        | 598.2984 |
| <a href="#">QV</a>     | 200.1394        | 228.1343 | <a href="#">QVP</a>    | 297.1921 | 325.1870        | <a href="#">QVPW</a>  | 483.2714        | 511.2663 |
| <a href="#">QVPWF</a>  | <b>630.3398</b> | 658.3348 | <a href="#">QVPWFG</a> | 687.3613 | 715.3562        | <a href="#">VP</a>    | 169.1335        | 197.1285 |
| <a href="#">VPW</a>    | 355.2129        | 383.2078 | <a href="#">VPWF</a>   | 502.2813 | 530.2762        | <a href="#">VPWFG</a> | 559.3027        | 587.2976 |
| <a href="#">VPWFGI</a> | 672.3868        | 700.3817 | <a href="#">PW</a>     | 256.1444 | <b>284.1394</b> | <a href="#">PWF</a>   | 403.2129        | 431.2078 |
| <a href="#">PWFG</a>   | 460.2343        | 488.2292 | <a href="#">PWFGI</a>  | 573.3184 | <b>601.3133</b> | <a href="#">WF</a>    | 306.1601        | 334.1550 |
| <a href="#">WFG</a>    | 363.1816        | 391.1765 | <a href="#">WFGI</a>   | 476.2656 | 504.2605        | <a href="#">WFGIE</a> | 605.3082        | 633.3031 |
| <a href="#">FG</a>     | 177.1022        | 205.0972 | <a href="#">FGI</a>    | 290.1863 | 318.1812        | <a href="#">FGIE</a>  | 419.2289        | 447.2238 |
| <a href="#">FGIEQ</a>  | 547.2875        | 575.2824 | <a href="#">FGIEQE</a> | 676.3301 | 704.3250        | <a href="#">GI</a>    | 143.1179        | 171.1128 |
| <a href="#">GIE</a>    | 272.1605        | 300.1554 | <a href="#">GIEQ</a>   | 400.2191 | 428.2140        | <a href="#">GIEQE</a> | <b>529.2617</b> | 557.2566 |
| <a href="#">GIEQEY</a> | 692.3250        | 720.3199 | <a href="#">IE</a>     | 215.1390 | 243.1339        | <a href="#">IEQ</a>   | 343.1976        | 371.1925 |
| <a href="#">IEQE</a>   | 472.2402        | 500.2351 | <a href="#">IEQEY</a>  | 635.3035 | 663.2984        | <a href="#">EQ</a>    | 230.1135        | 258.1084 |
| <a href="#">EQE</a>    | 359.1561        | 387.1510 | <a href="#">EQEY</a>   | 522.2195 | 550.2144        | <a href="#">EQEYT</a> | 623.2671        | 651.2620 |
| <a href="#">QE</a>     | 230.1135        | 258.1084 | <a href="#">QEY</a>    | 393.1769 | 421.1718        | <a href="#">QEYT</a>  | 494.2245        | 522.2195 |
| <a href="#">QEYTL</a>  | 607.3086        | 635.3035 | <a href="#">EY</a>     | 265.1183 | 293.1132        | <a href="#">EYT</a>   | 366.1660        | 394.1609 |
| <a href="#">EYTL</a>   | 479.2500        | 507.2449 | <a href="#">EYTL</a>   | 592.3341 | 620.3290        | <a href="#">YT</a>    | 237.1234        | 265.1183 |
| <a href="#">YTL</a>    | 350.2074        | 378.2023 | <a href="#">YTLL</a>   | 463.2915 | 491.2864        | <a href="#">YTLLQ</a> | 591.3501        | 619.3450 |
| <a href="#">TL</a>     | 187.1441        | 215.1390 | <a href="#">TLL</a>    | 300.2282 | 328.2231        | <a href="#">TLLQ</a>  | 428.2867        | 456.2817 |
| <a href="#">LL</a>     | 199.1805        | 227.1754 | <a href="#">LLQ</a>    | 327.2391 | 355.2340        | <a href="#">LQ</a>    | 214.1550        | 242.1499 |

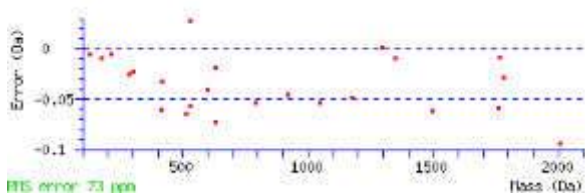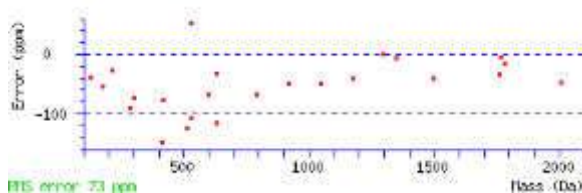

NCBI BLAST search of [VVSQVPWFGIEQEYTLQR](#)  
 (Parameters: blastp, nr protein database, expect=20000, no filter, PAM30)  
 Other BLAST [web gateways](#)

All matches to this query

| Score | Mr(calcd) | Delta  | Sequence                                  |
|-------|-----------|--------|-------------------------------------------|
| 98.0  | 2291.1950 | 0.1588 | <a href="#">VVSQVPWFGIEQEYTLQR</a>        |
| 12.3  | 2291.1645 | 0.1894 | <a href="#">EGDNLVEEAPADIPSLPELKR</a>     |
| 9.9   | 2291.1952 | 0.1586 | <a href="#">RAMPLNMLLTGGLDVOMFLR</a>      |
| 9.3   | 2291.1757 | 0.1781 | <a href="#">EDQHTIETLTHEITDLKR</a>        |
| 8.8   | 2291.1249 | 0.2289 | <a href="#">MRPEAETLALMSELVTSNQR</a>      |
| 8.6   | 2291.1883 | 0.1655 | <a href="#">QVRPPYLPGGGGGLGGGAAGQAAQR</a> |
| 8.2   | 2291.2307 | 0.1231 | <a href="#">AAATTCYGPSSIVLGSNLLKR</a>     |
| 8.2   | 2291.2784 | 0.0755 | <a href="#">VEVPAGLOPAMGGITAGLRSIVR</a>   |
| 8.1   | 2291.1952 | 0.1586 | <a href="#">RAMPLNMLLTGGLDVOMFLR</a>      |
| 8.0   | 2291.3287 | 0.0251 | <a href="#">RSSLLVFTILSGVCSILSVLK</a>     |

Mascot: <http://www.matrixscience.com/>

**MATRIX SCIENCE Mascot Search Results**

**Peptide View Spot no 66**

MS/MS Fragmentation of **RLTGLHETASIDNFSWGVANR**

Found in **gi|19387272** in **NCBI**nr, putative precursor chloroplastic glutamine synthetase [Oryza sativa Japonica Group]

Match to Query 89: 2343.326224 from(2344.333500,1+) intensity(0.0000) index(26)

Title: Label: C8, Spot\_Id: 228956, Peak\_List\_Id: 257809, MSMS Job\_Run\_Id: 24936, Comment:

Data file ppw\_C8\_138985146000.txt

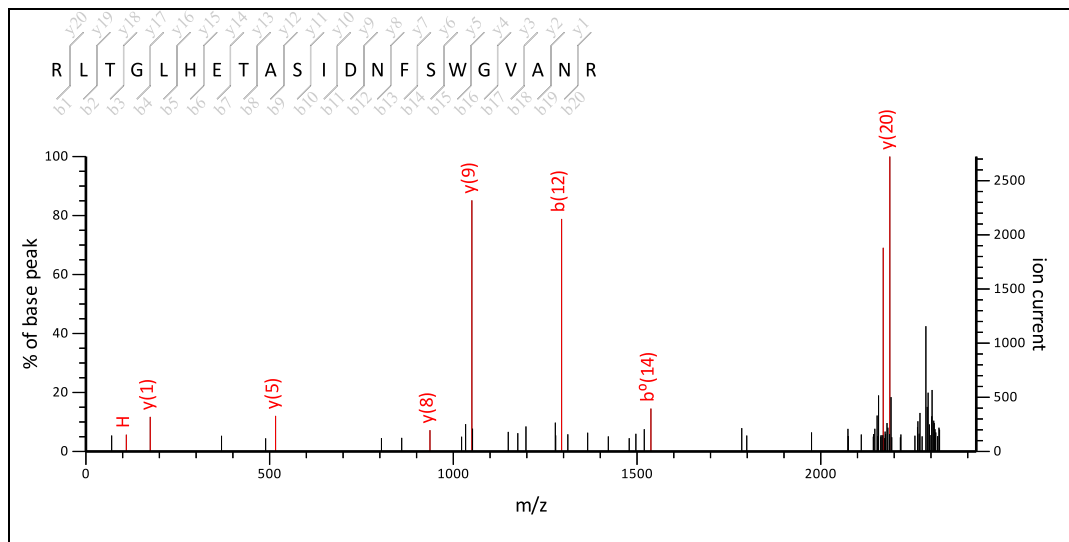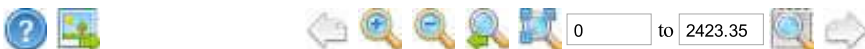

Label all possible matches  Label matches used for scoring

Monoisotopic mass of neutral peptide Mr(calc): 2343.1720

Fixed modifications: Carbamidomethyl (C) (apply to specified residues or termini only)

Ions Score: 29 Expect: 1.5

Matches : 11/401 fragment ions using 17 most intense peaks [\(help\)](#)

| #  | Immon.   | a         | a*        | a <sup>0</sup> | b         | b*        | b <sup>0</sup> | d         | d'        | Seq. | v         | w         | w'        | y         | y*        |
|----|----------|-----------|-----------|----------------|-----------|-----------|----------------|-----------|-----------|------|-----------|-----------|-----------|-----------|-----------|
| 1  | 129.1135 | 129.1135  | 112.0869  |                | 157.1084  | 140.0818  |                | 44.0495   |           | R    |           |           |           |           |           |
| 2  | 86.0964  | 242.1975  | 225.1710  |                | 270.1925  | 253.1659  |                | 200.1506  |           | L    | 2129.9999 | 2129.0047 |           | 2188.0782 | 2171.0516 |
| 3  | 74.0600  | 343.2452  | 326.2187  | 325.2347       | 371.2401  | 354.2136  | 353.2296       | 327.2503  | 329.2296  | T    | 2028.9522 | 2041.9726 | 2043.9519 | 2074.9941 | 2057.9675 |
| 4  | 30.0338  | 400.2667  | 383.2401  | 382.2561       | 428.2616  | 411.2350  | 410.2510       |           |           | G    |           |           |           | 1973.9464 | 1956.9199 |
| 5  | 86.0964  | 513.3507  | 496.3242  | 495.3402       | 541.3457  | 524.3191  | 523.3351       | 471.3038  |           | L    | 1858.8467 | 1857.8515 |           | 1916.9250 | 1899.8984 |
| 6  | 110.0713 | 650.4097  | 633.3831  | 632.3991       | 678.4046  | 661.3780  | 660.3940       |           |           | H    | 1721.7878 |           |           | 1803.8409 | 1786.8143 |
| 7  | 102.0550 | 779.4522  | 762.4257  | 761.4417       | 807.4472  | 790.4206  | 789.4366       | 721.4468  |           | E    | 1592.7452 | 1591.7499 |           | 1666.7820 | 1649.7554 |
| 8  | 74.0600  | 880.4999  | 863.4734  | 862.4894       | 908.4948  | 891.4683  | 890.4843       | 864.5050  | 866.4843  | T    | 1491.6975 | 1504.7179 | 1506.6972 | 1537.7394 | 1520.7128 |
| 9  | 44.0495  | 951.5370  | 934.5105  | 933.5265       | 979.5320  | 962.5054  | 961.5214       |           |           | A    | 1420.6604 |           |           | 1436.6917 | 1419.6652 |
| 10 | 60.0444  | 1038.5691 | 1021.5425 | 1020.5585      | 1066.5640 | 1049.5374 | 1048.5534      | 1022.5742 |           | S    | 1333.6284 | 1332.6331 |           | 1365.6546 | 1348.6280 |
| 11 | 86.0964  | 1151.6531 | 1134.6266 | 1133.6426      | 1179.6480 | 1162.6215 | 1161.6375      | 1123.6218 | 1137.6375 | I    | 1220.5443 | 1233.5647 | 1247.5804 | 1278.6226 | 1261.5960 |
| 12 | 88.0393  | 1266.6801 | 1249.6535 | 1248.6695      | 1294.6750 | 1277.6484 | 1276.6644      | 1222.6902 |           | D    | 1105.5174 | 1104.5221 |           | 1165.5385 | 1148.5119 |
| 13 | 87.0553  | 1380.7230 | 1363.6965 | 1362.7124      | 1408.7179 | 1391.6914 | 1390.7074      | 1337.7172 |           | N    | 991.4744  | 990.4792  |           | 1050.5116 | 1033.4850 |
| 14 | 120.0808 | 1527.7914 | 1510.7649 | 1509.7809      | 1555.7863 | 1538.7598 | 1537.7758      |           |           | F    | 844.4060  |           |           | 936.4686  | 919.4421  |
| 15 | 60.0444  | 1614.8234 | 1597.7969 | 1596.8129      | 1642.8184 | 1625.7918 | 1624.8078      | 1598.8285 |           | S    | 757.3740  | 756.3787  |           | 789.4002  | 772.3737  |
| 16 | 159.0917 | 1800.9028 | 1783.8762 | 1782.8922      | 1828.8977 | 1811.8711 | 1810.8871      |           |           | W    | 571.2947  |           |           | 702.3682  | 685.3416  |
| 17 | 30.0338  | 1857.9242 | 1840.8977 | 1839.9137      | 1885.9191 | 1868.8926 | 1867.9086      |           |           | G    |           |           |           | 516.2889  | 499.2623  |
| 18 | 72.0808  | 1956.9926 | 1939.9661 | 1938.9821      | 1984.9876 | 1967.9610 | 1966.9770      | 1942.9770 |           | V    | 415.2048  | 428.2252  |           | 459.2674  | 442.2409  |
| 19 | 44.0495  | 2028.0298 | 2011.0032 | 2010.0192      | 2056.0247 | 2038.9981 | 2038.0141      |           |           | A    | 344.1677  |           |           | 360.1990  | 343.1724  |
| 20 | 87.0553  | 2142.0727 | 2125.0461 | 2124.0621      | 2170.0676 | 2153.0410 | 2152.0570      | 2099.0669 |           | N    | 230.1248  | 229.1295  |           | 289.1619  | 272.1353  |
| 21 | 129.1135 |           |           |                |           |           |                |           |           | R    | 74.0237   | 73.0284   |           | 175.1190  | 158.0924  |

| Seq | ya | yb | Seq | ya | yb | Seq | ya | yb |
|-----|----|----|-----|----|----|-----|----|----|
|     |    |    |     |    |    |     |    |    |

|        |          |          |         |          |          |        |          |          |
|--------|----------|----------|---------|----------|----------|--------|----------|----------|
| LT     | 187.1441 | 215.1390 | LTG     | 244.1656 | 272.1605 | LTGL   | 357.2496 | 385.2445 |
| LTGLH  | 494.3085 | 522.3035 | LTGLHE  | 623.3511 | 651.3461 | TG     | 131.0815 | 159.0764 |
| TGL    | 244.1656 | 272.1605 | TGLH    | 381.2245 | 409.2194 | TGLHE  | 510.2671 | 538.2620 |
| TGLHET | 611.3148 | 639.3097 | TGLHETA | 682.3519 | 710.3468 | GL     | 143.1179 | 171.1128 |
| GLH    | 280.1768 | 308.1717 | GLHE    | 409.2194 | 437.2143 | GLHET  | 510.2671 | 538.2620 |
| GLHETA | 581.3042 | 609.2991 | GLHETAS | 668.3362 | 696.3311 | LH     | 223.1553 | 251.1503 |
| LHE    | 352.1979 | 380.1928 | LHET    | 453.2456 | 481.2405 | LHETA  | 524.2827 | 552.2776 |
| LHETAS | 611.3148 | 639.3097 | HE      | 239.1139 | 267.1088 | HET    | 340.1615 | 368.1565 |
| HETA   | 411.1987 | 439.1936 | HETAS   | 498.2307 | 526.2256 | HETASI | 611.3148 | 639.3097 |
| ET     | 203.1026 | 231.0975 | ETA     | 274.1397 | 302.1347 | ETAS   | 361.1718 | 389.1667 |
| ETASI  | 474.2558 | 502.2508 | ETASID  | 589.2828 | 617.2777 | TA     | 145.0972 | 173.0921 |
| TAS    | 232.1292 | 260.1241 | TASI    | 345.2132 | 373.2082 | TASID  | 460.2402 | 488.2351 |
| TASIDN | 574.2831 | 602.2780 | AS      | 131.0815 | 159.0764 | ASI    | 244.1656 | 272.1605 |
| ASID   | 359.1925 | 387.1874 | ASIDN   | 473.2354 | 501.2304 | ASIDNF | 620.3039 | 648.2988 |
| SI     | 173.1285 | 201.1234 | SID     | 288.1554 | 316.1503 | SIDN   | 402.1983 | 430.1932 |
| SIDNF  | 549.2667 | 577.2617 | SIDNFS  | 636.2988 | 664.2937 | ID     | 201.1234 | 229.1183 |
| IDN    | 315.1663 | 343.1612 | IDNF    | 462.2347 | 490.2296 | IDNFS  | 549.2667 | 577.2617 |
| DN     | 202.0822 | 230.0771 | DNF     | 349.1506 | 377.1456 | DNFS   | 436.1827 | 464.1776 |
| DNFSW  | 622.2620 | 650.2569 | DNFSWG  | 679.2835 | 707.2784 | NF     | 234.1237 | 262.1186 |
| NFS    | 321.1557 | 349.1506 | NFSW    | 507.2350 | 535.2300 | NFSWG  | 564.2565 | 592.2514 |
| NFSWGV | 663.3249 | 691.3198 | FS      | 207.1128 | 235.1077 | FSW    | 393.1921 | 421.1870 |
| FSWG   | 450.2136 | 478.2085 | FSWGV   | 549.2820 | 577.2769 | FSWGV  | 620.3191 | 648.3140 |
| SW     | 246.1237 | 274.1186 | SWG     | 303.1452 | 331.1401 | SWGVA  | 402.2136 | 430.2085 |
| SWGVA  | 473.2507 | 501.2456 | SWGVAN  | 587.2936 | 615.2885 | WG     | 216.1131 | 244.1081 |
| WGV    | 315.1816 | 343.1765 | WGV     | 386.2187 | 414.2136 | WGVAN  | 500.2616 | 528.2565 |
| GV     | 129.1022 | 157.0972 | GVA     | 200.1394 | 228.1343 | GVAN   | 314.1823 | 342.1772 |
| VA     | 143.1179 | 171.1128 | VAN     | 257.1608 | 285.1557 | AN     | 158.0924 | 186.0873 |

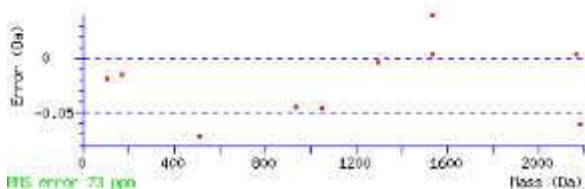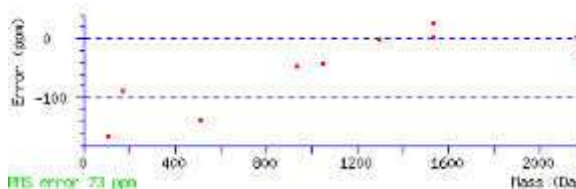

NCBI BLAST search of [RLTGLHETASIDNFSWGVANR](#)  
 (Parameters: blastp, nr protein database, expect=20000, no filter, PAM30)  
 Other BLAST [web gateways](#)

All matches to this query

| Score | Mr(calc)  | Delta   | Sequence                                  |
|-------|-----------|---------|-------------------------------------------|
| 28.9  | 2343.1720 | 0.1542  | <a href="#">RLTGLHETASIDNFSWGVANR</a>     |
| 17.1  | 2343.1892 | 0.1370  | <a href="#">LEELNLSHNMLSGLIPASFSR</a>     |
| 13.5  | 2343.1416 | 0.1846  | <a href="#">SSTIYEVGVQMVFIYNEQVR</a>      |
| 11.9  | 2343.3314 | -0.0052 | <a href="#">IVLKPLPETVGEDRPALFPPR</a>     |
| 11.3  | 2343.1722 | 0.1541  | <a href="#">WAAEHPDMLKVWYVIDQVK</a>       |
| 11.2  | 2343.1940 | 0.1323  | <a href="#">RTPLSELRPMNTMYNIHVR</a>       |
| 11.1  | 2343.1980 | 0.1282  | <a href="#">QMNLSHVISHFSEFGMKVLP</a>      |
| 10.6  | 2343.2086 | 0.1177  | <a href="#">FLSPALFHFKDPIMITEGK</a>       |
| 10.0  | 2343.1792 | 0.1471  | <a href="#">RAAAAASAHGSGGLGOENAIIEHLR</a> |
| 9.7   | 2343.2838 | 0.0424  | <a href="#">LVNALVSAGKPYELLIEPDER</a>     |

Mascot: <http://www.matrixscience.com/>



**MATRIX SCIENCE Mascot Search Results**

**Peptide View Spot no 66**

MS/MS Fragmentation of **GGNNILVMCDTYTPAGEPIPTNKR**

Found in **gi|19387272** in **NCBI**nr, putative precursor chloroplastic glutamine synthetase [Oryza sativa Japonica Group]

Match to Query 93: 2617.441224 from(2618.448500,1+) intensity(0.0000) index(28)

Title: Label: C8, Spot\_Id: 228956, Peak\_List\_Id: 257811, MSMS Job\_Run\_Id: 24936, Comment:

Data file ppw\_C8\_138985146000.txt

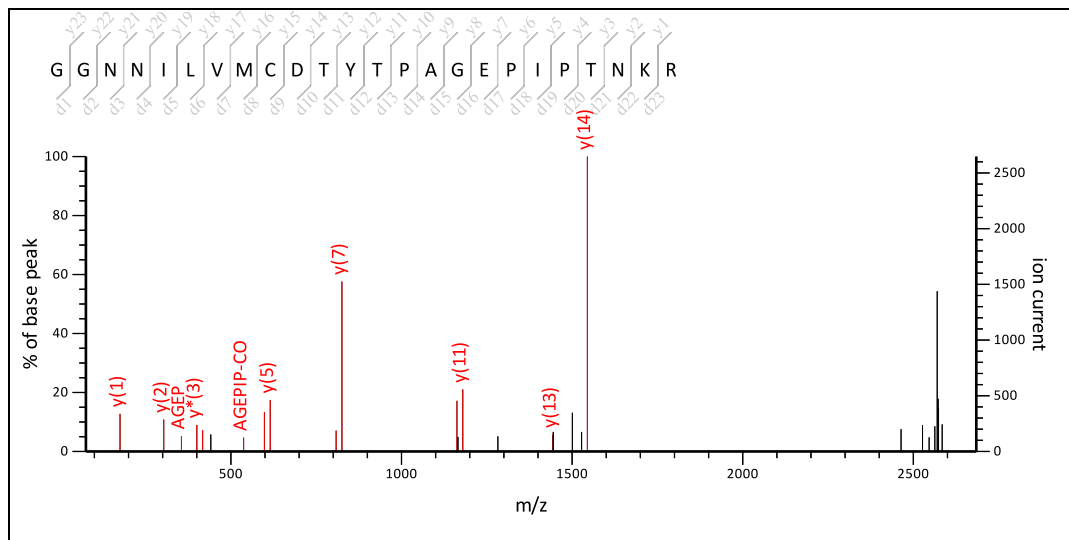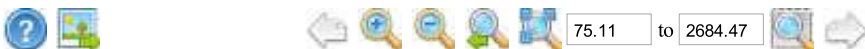

Label all possible matches  Label matches used for scoring

Monoisotopic mass of neutral peptide Mr(calc): 2617.2628

Fixed modifications: Carbamidomethyl (C) (apply to specified residues or termini only)

Ions Score: 48 Expect: 0.019

Matches : 17/464 fragment ions using 22 most intense peaks [\(help\)](#)

| #  | Immon.   | a         | a*        | a <sup>0</sup> | b         | b*        | b <sup>0</sup> | d         | d'        | Seq. | v         | w         | w'        | y         | y*        |
|----|----------|-----------|-----------|----------------|-----------|-----------|----------------|-----------|-----------|------|-----------|-----------|-----------|-----------|-----------|
| 1  | 30.0338  | 30.0338   |           |                | 58.0287   |           |                | 44.0495   |           | G    |           |           |           |           |           |
| 2  | 30.0338  | 87.0553   |           |                | 115.0502  |           |                |           |           | G    |           |           |           | 2561.2487 | 2544.2221 |
| 3  | 87.0553  | 201.0982  | 184.0717  |                | 229.0931  | 212.0666  |                | 158.0924  |           | N    | 2445.1901 | 2444.1948 |           | 2504.2272 | 2487.2007 |
| 4  | 87.0553  | 315.1411  | 298.1146  |                | 343.1361  | 326.1095  |                | 272.1353  |           | N    | 2331.1472 | 2330.1519 |           | 2390.1843 | 2373.1577 |
| 5  | 86.0964  | 428.2252  | 411.1987  |                | 456.2201  | 439.1936  |                | 400.1939  | 414.2096  | I    | 2218.0631 | 2231.0835 | 2245.0992 | 2276.1414 | 2259.1148 |
| 6  | 86.0964  | 541.3093  | 524.2827  |                | 569.3042  | 552.2776  |                | 499.2623  |           | L    | 2104.9790 | 2103.9838 |           | 2163.0573 | 2146.0307 |
| 7  | 72.0808  | 640.3777  | 623.3511  |                | 668.3726  | 651.3461  |                | 626.3620  |           | V    | 2005.9106 | 2018.9310 |           | 2049.9732 | 2032.9467 |
| 8  | 104.0528 | 771.4182  | 754.3916  |                | 799.4131  | 782.3865  |                | 711.4148  |           | M    | 1874.8701 | 1873.8749 |           | 1950.9048 | 1933.8783 |
| 9  | 133.0430 | 931.4488  | 914.4223  |                | 959.4437  | 942.4172  |                | 842.4553  |           | C    | 1714.8395 | 1713.8442 |           | 1819.8643 | 1802.8378 |
| 10 | 88.0393  | 1046.4758 | 1029.4492 | 1028.4652      | 1074.4707 | 1057.4441 | 1056.4601      | 1002.4859 |           | D    | 1599.8125 | 1598.8173 |           | 1659.8337 | 1642.8071 |
| 11 | 74.0600  | 1147.5234 | 1130.4969 | 1129.5129      | 1175.5184 | 1158.4918 | 1157.5078      | 1131.5285 | 1133.5078 | T    | 1498.7649 | 1511.7853 | 1513.7645 | 1544.8067 | 1527.7802 |
| 12 | 136.0757 | 1310.5868 | 1293.5602 | 1292.5762      | 1338.5817 | 1321.5551 | 1320.5711      |           |           | Y    | 1335.7015 |           |           | 1443.7591 | 1426.7325 |
| 13 | 74.0600  | 1411.6344 | 1394.6079 | 1393.6239      | 1439.6294 | 1422.6028 | 1421.6188      | 1395.6395 | 1397.6188 | T    | 1234.6539 | 1247.6743 | 1249.6535 | 1280.6957 | 1263.6692 |
| 14 | 70.0651  | 1508.6872 | 1491.6607 | 1490.6766      | 1536.6821 | 1519.6556 | 1518.6716      | 1482.6716 |           | P    | 1137.6011 | 1136.6058 |           | 1179.6480 | 1162.6215 |
| 15 | 44.0495  | 1579.7243 | 1562.6978 | 1561.7138      | 1607.7192 | 1590.6927 | 1589.7087      |           |           | A    | 1066.5640 |           |           | 1082.5953 | 1065.5687 |
| 16 | 30.0338  | 1636.7458 | 1619.7192 | 1618.7352      | 1664.7407 | 1647.7142 | 1646.7301      |           |           | G    |           |           |           | 1011.5582 | 994.5316  |
| 17 | 102.0550 | 1765.7884 | 1748.7618 | 1747.7778      | 1793.7833 | 1776.7568 | 1775.7727      | 1707.7829 |           | E    | 880.4999  | 879.5047  |           | 954.5367  | 937.5102  |
| 18 | 70.0651  | 1862.8411 | 1845.8146 | 1844.8306      | 1890.8361 | 1873.8095 | 1872.8255      | 1836.8255 |           | P    | 783.4472  | 782.4519  |           | 825.4941  | 808.4676  |
| 19 | 86.0964  | 1975.9252 | 1958.8987 | 1957.9146      | 2003.9201 | 1986.8936 | 1985.9096      | 1947.8939 | 1961.9096 | I    | 670.3631  | 683.3835  | 697.3991  | 728.4413  | 711.4148  |
| 20 | 70.0651  | 2072.9780 | 2055.9514 | 2054.9674      | 2100.9729 | 2083.9463 | 2082.9623      | 2046.9623 |           | P    | 573.3103  | 572.3151  |           | 615.3573  | 598.3307  |
| 21 | 74.0600  | 2174.0257 | 2156.9991 | 2156.0151      | 2202.0206 | 2184.9940 | 2184.0100      | 2158.0307 | 2160.0100 | T    | 472.2627  | 485.2831  | 487.2623  | 518.3045  | 501.2780  |
| 22 | 87.0553  | 2288.0686 | 2271.0420 | 2270.0580      | 2316.0635 | 2299.0369 | 2298.0529      | 2245.0628 |           | N    | 358.2197  | 357.2245  |           | 417.2568  | 400.2303  |
| 23 | 101.1073 | 2416.1635 | 2399.1370 | 2398.1530      | 2444.1585 | 2427.1319 | 2426.1479      | 2359.1057 |           | K    | 230.1248  | 229.1295  |           | 303.2139  | 286.1874  |

|    |          |  |  |  |  |  |  |  |  |   |         |         |          |          |
|----|----------|--|--|--|--|--|--|--|--|---|---------|---------|----------|----------|
| 24 | 129.1135 |  |  |  |  |  |  |  |  | R | 74.0237 | 73.0284 | 175.1190 | 158.0924 |
|----|----------|--|--|--|--|--|--|--|--|---|---------|---------|----------|----------|

| Seq    | ya       | yb       | Seq     | ya       | yb       | Seq    | ya       | yb       |
|--------|----------|----------|---------|----------|----------|--------|----------|----------|
| GN     | 144.0768 | 172.0717 | GNN     | 258.1197 | 286.1146 | GNNI   | 371.2037 | 399.1987 |
| GNNIL  | 484.2878 | 512.2827 | GNNILV  | 583.3562 | 611.3511 | NN     | 201.0982 | 229.0931 |
| NNI    | 314.1823 | 342.1772 | NNIL    | 427.2663 | 455.2613 | NNILV  | 526.3348 | 554.3297 |
| NNILVM | 657.3752 | 685.3702 | NI      | 200.1394 | 228.1343 | NIL    | 313.2234 | 341.2183 |
| NILV   | 412.2918 | 440.2867 | NILVM   | 543.3323 | 571.3272 | IL     | 199.1805 | 227.1754 |
| ILV    | 298.2489 | 326.2438 | ILVM    | 429.2894 | 457.2843 | ILVMC  | 589.3200 | 617.3150 |
| LV     | 185.1648 | 213.1598 | LVM     | 316.2053 | 344.2002 | LVMC   | 476.2360 | 504.2309 |
| LVMCD  | 591.2629 | 619.2578 | LVMCDT  | 692.3106 | 720.3055 | VM     | 203.1213 | 231.1162 |
| VMC    | 363.1519 | 391.1468 | VMCD    | 478.1789 | 506.1738 | VMCDT  | 579.2265 | 607.2214 |
| MC     | 264.0835 | 292.0784 | MCD     | 379.1104 | 407.1054 | MCDT   | 480.1581 | 508.1530 |
| MCDTY  | 643.2214 | 671.2164 | CD      | 248.0700 | 276.0649 | CDT    | 349.1176 | 377.1125 |
| CDTY   | 512.1810 | 540.1759 | CDTYT   | 613.2286 | 641.2236 | DT     | 189.0870 | 217.0819 |
| DTY    | 352.1503 | 380.1452 | DTYT    | 453.1980 | 481.1929 | DTYTP  | 550.2508 | 578.2457 |
| DTYTPA | 621.2879 | 649.2828 | DTYTPAG | 678.3093 | 706.3042 | TY     | 237.1234 | 265.1183 |
| TYT    | 338.1710 | 366.1660 | TYTP    | 435.2238 | 463.2187 | TYTPA  | 506.2609 | 534.2558 |
| TYTPAG | 563.2824 | 591.2773 | TYTPAGE | 692.3250 | 720.3199 | YT     | 237.1234 | 265.1183 |
| YTP    | 334.1761 | 362.1710 | YTPA    | 405.2132 | 433.2082 | YTPAG  | 462.2347 | 490.2296 |
| YTPAGE | 591.2773 | 619.2722 | YTPAGEP | 688.3301 | 716.3250 | TP     | 171.1128 | 199.1077 |
| TPA    | 242.1499 | 270.1448 | TPAG    | 299.1714 | 327.1663 | TPAGE  | 428.2140 | 456.2089 |
| TPAGEP | 525.2667 | 553.2617 | TPAGEPI | 638.3508 | 666.3457 | PA     | 141.1022 | 169.0972 |
| PAG    | 198.1237 | 226.1186 | PAGE    | 327.1663 | 355.1612 | PAGEP  | 424.2191 | 452.2140 |
| PAGEPI | 537.3031 | 565.2980 | PAGEPIP | 634.3559 | 662.3508 | AG     | 101.0709 | 129.0659 |
| AGE    | 230.1135 | 258.1084 | AGEP    | 327.1663 | 355.1612 | AGEPI  | 440.2504 | 468.2453 |
| AGEPIP | 537.3031 | 565.2980 | AGEPIPT | 638.3508 | 666.3457 | GE     | 159.0764 | 187.0713 |
| GEP    | 256.1292 | 284.1241 | GEPI    | 369.2132 | 397.2082 | GEPIP  | 466.2660 | 494.2609 |
| GEPIPT | 567.3137 | 595.3086 | GEPIPTN | 681.3566 | 709.3515 | EP     | 199.1077 | 227.1026 |
| EPI    | 312.1918 | 340.1867 | EPIP    | 409.2445 | 437.2395 | EPIPT  | 510.2922 | 538.2871 |
| EPIPTN | 624.3352 | 652.3301 | PI      | 183.1492 | 211.1441 | PIP    | 280.2020 | 308.1969 |
| PIPT   | 381.2496 | 409.2445 | PIPTN   | 495.2926 | 523.2875 | PIPTNK | 623.3875 | 651.3824 |
| IP     | 183.1492 | 211.1441 | IPT     | 284.1969 | 312.1918 | IPTN   | 398.2398 | 426.2347 |
| IPTNK  | 526.3348 | 554.3297 | PT      | 171.1128 | 199.1077 | PTN    | 285.1557 | 313.1506 |
| PTNK   | 413.2507 | 441.2456 | TN      | 188.1030 | 216.0979 | TNK    | 316.1979 | 344.1928 |
| NK     | 215.1503 | 243.1452 |         |          |          |        |          |          |

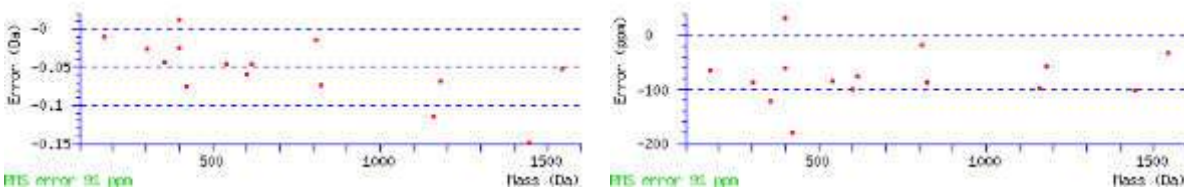

NCBI BLAST search of [GGNNILVMCDTYTPAGEPIPTNKR](#)  
 (Parameters: blastp, nr protein database, expect=20000, no filter, PAM30)  
 Other BLAST [web gateways](#)

All matches to this query

| Score | Mr(calc)  | Delta  | Sequence                                 |
|-------|-----------|--------|------------------------------------------|
| 48.0  | 2617.2628 | 0.1784 | <a href="#">GGNNILVMCDTYTPAGEPIPTNKR</a> |
| 11.3  | 2617.4228 | 0.0185 | <a href="#">QOSSPPLPLPELAPOPLOPSPLOR</a> |
| 7.2   | 2617.2094 | 0.2319 | <a href="#">DMFGPDIPNATDILVPMWVNNR</a>   |
| 5.7   | 2617.2831 | 0.1582 | <a href="#">KLSEDLQNALNTLSLAAAEEQR</a>   |
| 5.3   | 2617.3951 | 0.0461 | <a href="#">SYGPVPMGLLOGRVTHIIWPPQR</a>  |
| 5.2   | 2617.2224 | 0.2188 | <a href="#">SGENLSATLHPSGRDDMSILSMOR</a> |
| 5.1   | 2617.3026 | 0.1386 | <a href="#">MLPAVSMGLAPMDVSRTOQDKPR</a>  |



|     |           |        |                                           |
|-----|-----------|--------|-------------------------------------------|
| 5.1 | 2617.3026 | 0.1386 | <a href="#">MLPAVSMGLAPMDVSRDQDKPR</a>    |
| 4.9 | 2617.2953 | 0.1460 | <a href="#">VLGLDVCSETVVGNDMLRGVSGGOR</a> |
| 4.7 | 2617.3751 | 0.0661 | <a href="#">LGVLLEARGESYYNDLIPPTLER</a>   |

Mascot: <http://www.matrixscience.com/>

# MATRIX SCIENCE Mascot Search Results

## Peptide View **Spot no 67**

MS/MS Fragmentation of **VYDDEVR**

Found in **gi|8918361** in **NCBIInr**, RuBisCO activase small isoform precursor [Oryza sativa]

Match to Query 4: 894.424424 from(895.431700,1+) intensity(0.0000) index(1)

Title: Label: D4, Spot\_Id: 219725, Peak\_List\_Id: 225233, MSMS Job\_Run\_Id: 21770, Comment:

Data file C:\Documents and Settings\Administrator\Desktop\farah BHU\spot set plate\Farah-Garima 11May 2013\ppw\_D4\_136842162200.txt

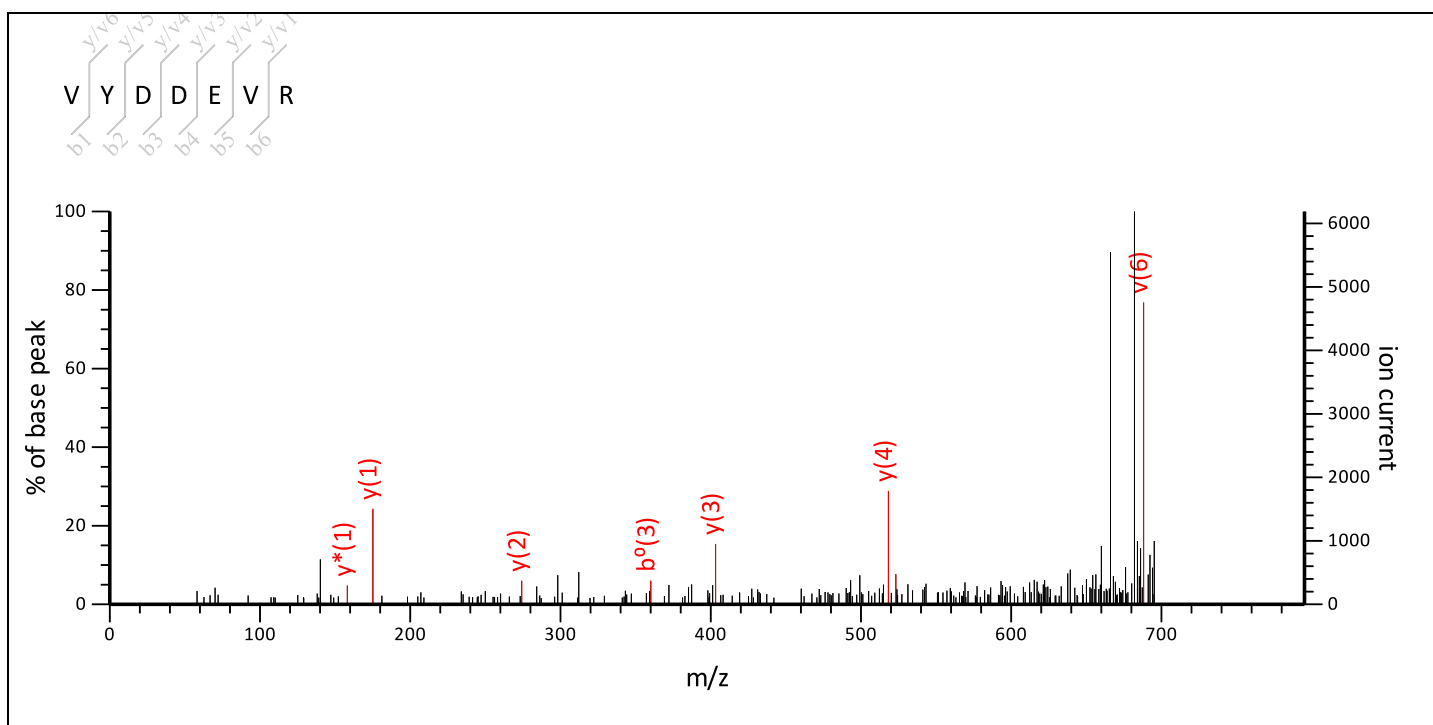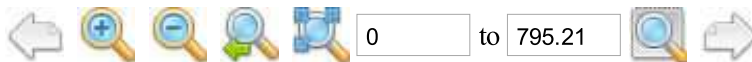

Label all possible matches  Label matches used for scoring

**Monoisotopic mass of neutral peptide Mr(calc):** 894.4083

**Fixed modifications:** Carbamidomethyl (C) (apply to specified residues or termini only)

**Ions Score:** 15 **Expect:** 71

**Matches :** 9/79 fragment ions using 21 most intense peaks ([help](#))

| # | Immon.   | a        | a <sup>0</sup> | b        | b <sup>0</sup> | d        | Seq. | v        | w        | y        | y*       | y <sup>0</sup> | # |
|---|----------|----------|----------------|----------|----------------|----------|------|----------|----------|----------|----------|----------------|---|
| 1 | 72.0808  | 72.0808  |                | 100.0757 |                | 44.0495  | V    |          |          |          |          |                | 7 |
| 2 | 136.0757 | 235.1441 |                | 263.1390 |                |          | Y    | 688.2897 |          | 796.3472 | 779.3206 | 778.3366       | 6 |
| 3 | 88.0393  | 350.1710 | 332.1605       | 378.1660 | 360.1554       | 306.1812 | D    | 573.2627 | 572.2675 | 633.2838 | 616.2573 | 615.2733       | 5 |
| 4 | 88.0393  | 465.1980 | 447.1874       | 493.1929 | 475.1823       | 421.2082 | D    | 458.2358 | 457.2405 | 518.2569 | 501.2304 | 500.2463       | 4 |
| 5 | 102.0550 | 594.2406 | 576.2300       | 622.2355 | 604.2249       | 536.2351 | E    | 329.1932 | 328.1979 | 403.2300 | 386.2034 | 385.2194       | 3 |
| 6 | 72.0808  | 693.3090 | 675.2984       | 721.3039 | 703.2933       | 679.2933 | V    | 230.1248 | 243.1452 | 274.1874 | 257.1608 |                | 2 |
| 7 | 129.1135 |          |                |          |                |          | R    | 74.0237  | 73.0284  | 175.1190 | 158.0924 |                | 1 |

| Seq          | ya       | yb       | Seq        | ya       | yb       | Seq         | ya       | yb              |
|--------------|----------|----------|------------|----------|----------|-------------|----------|-----------------|
| <b>YD</b>    | 251.1026 | 279.0975 | <b>YDD</b> | 366.1296 | 394.1245 | <b>YDDE</b> | 495.1722 | <b>523.1671</b> |
| <b>YDDEV</b> | 594.2406 | 622.2355 | <b>DD</b>  | 203.0662 | 231.0612 | <b>DDE</b>  | 332.1088 | <b>360.1038</b> |
| <b>DDEV</b>  | 431.1773 | 459.1722 | <b>DE</b>  | 217.0819 | 245.0768 | <b>DEV</b>  | 316.1503 | 344.1452        |
| <b>EV</b>    | 201.1234 | 229.1183 |            |          |          |             |          |                 |

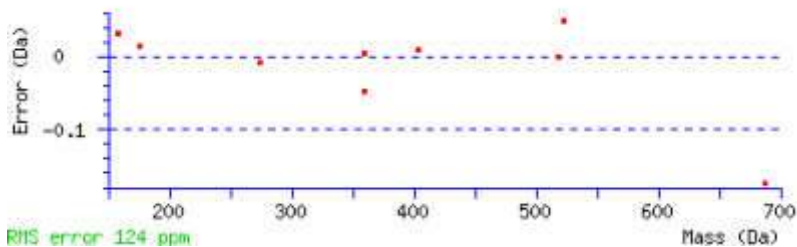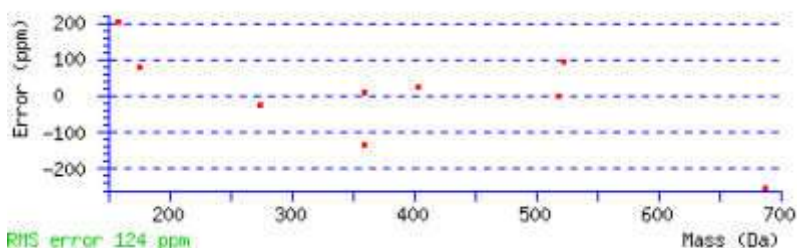

NCBI **BLAST** search of [VYDDEV](#)

(Parameters: blastp, nr protein database, expect=20000, no filter, PAM30)

Other BLAST [web gateways](#)

#### All matches to this query

| Score | Mr(calc) | Delta   | Sequence                |
|-------|----------|---------|-------------------------|
| 14.5  | 894.4083 | 0.0161  | <a href="#">VYDDEV</a>  |
| 8.5   | 894.4633 | -0.0389 | <a href="#">VDYMIVR</a> |
| 8.2   | 894.3719 | 0.0525  | <a href="#">DDFDLDR</a> |
| 8.2   | 894.4083 | 0.0161  | <a href="#">EFTDEV</a>  |
| 8.2   | 894.4083 | 0.0161  | <a href="#">ETFDDL</a>  |
| 8.2   | 894.3542 | 0.0703  | <a href="#">FDDDMPR</a> |
| 8.2   | 894.4447 | -0.0203 | <a href="#">LYTDVER</a> |
| 8.2   | 894.3389 | 0.0855  | <a href="#">MDDDDL</a>  |
| 8.2   | 894.4447 | -0.0203 | <a href="#">TYLDVER</a> |
| 8.2   | 894.3905 | 0.0339  | <a href="#">YVDDMPR</a> |

Mascot: <http://www.matrixscience.com/>



# Mascot Search Results

## Peptide View **Spot no 67**

### MS/MS Fragmentation of **FYWAPTR**

Found in **gi|8918361** in **NCBI**nr, RuBisCO activase small isoform precursor [Oryza sativa]

Match to Query 7: 939.446334 from(940.453610,1+) intensity(0.0000) index(2)

Title: Label: D4, Spot\_Id: 219725, Peak\_List\_Id: 225224, MSMS Job\_Run\_Id: 21770, Comment:

Data file C:\Documents and Settings\Administrator\Desktop\farah BHU\spot set plate\Farah-Garima 11May 2013\ppw\_D4\_136842162200.txt

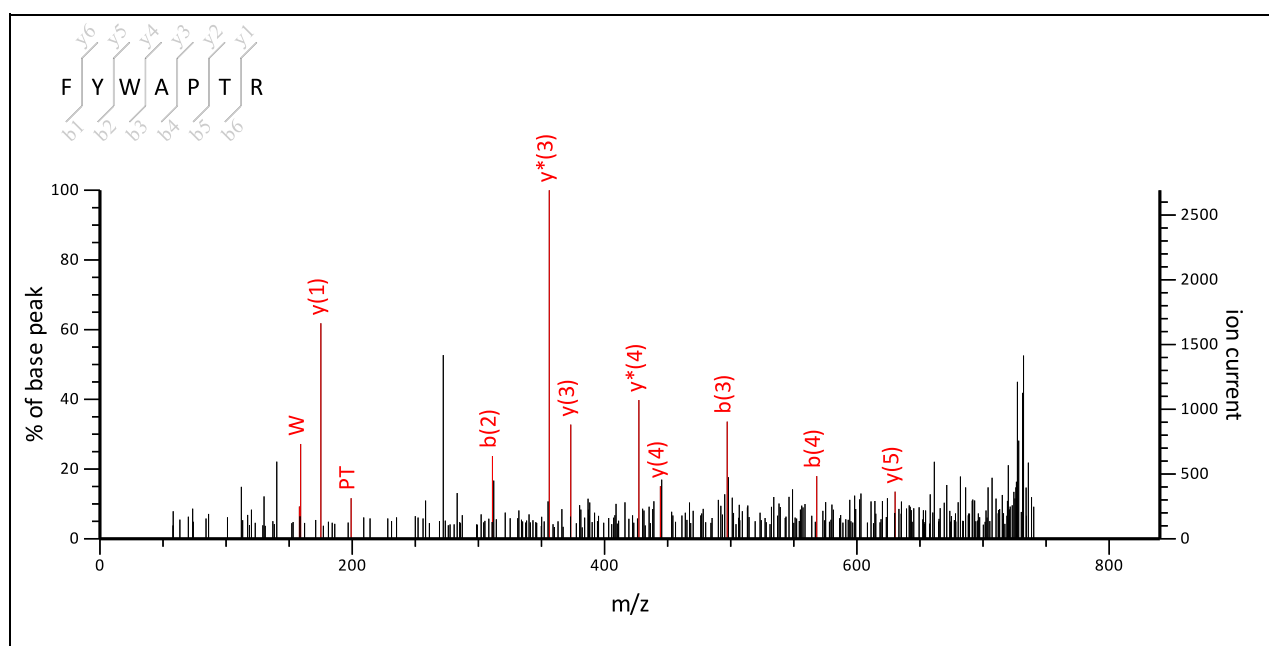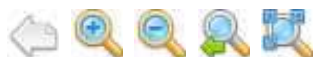

0

to 840.19



Label all possible matches  Label matches used for scoring

**Monoisotopic mass of neutral peptide Mr(calc):** 939.4603

**Fixed modifications:** Carbamidomethyl (C) (apply to specified residues or termini only)

**Ions Score:** 14 **Expect:** 70

**Matches:** 12/72 fragment ions using 28 most intense peaks ([help](#))

| # | Immon.          | a        | a <sup>0</sup> | b               | b <sup>0</sup> | d        | d'       | Seq. | v        | w        | w'       | y               | y*              | y <sup>0</sup> | # |
|---|-----------------|----------|----------------|-----------------|----------------|----------|----------|------|----------|----------|----------|-----------------|-----------------|----------------|---|
| 1 | 120.0808        | 120.0808 |                | 148.0757        |                | 44.0495  |          | F    |          |          |          |                 |                 |                | 7 |
| 2 | 136.0757        | 283.1441 |                | <b>311.1390</b> |                |          |          | Y    | 685.3416 |          |          | 793.3992        | 776.3726        | 775.3886       | 6 |
| 3 | <b>159.0917</b> | 469.2234 |                | <b>497.2183</b> |                |          |          | W    | 499.2623 |          |          | <b>630.3358</b> | 613.3093        | 612.3253       | 5 |
| 4 | 44.0495         | 540.2605 |                | <b>568.2554</b> |                |          |          | A    | 428.2252 |          |          | <b>444.2565</b> | <b>427.2300</b> | 426.2459       | 4 |
| 5 | 70.0651         | 637.3133 |                | 665.3082        |                | 611.2976 |          | P    | 331.1724 | 330.1772 |          | <b>373.2194</b> | <b>356.1928</b> | 355.2088       | 3 |
| 6 | 74.0600         | 738.3610 | 720.3504       | 766.3559        | 748.3453       | 722.3661 | 724.3453 | T    | 230.1248 | 243.1452 | 245.1244 | 276.1666        | 259.1401        | 258.1561       | 2 |
| 7 | 129.1135        |          |                |                 |                |          |          | R    | 74.0237  | 73.0284  |          | <b>175.1190</b> | <b>158.0924</b> |                | 1 |

| Seq   | ya       | yb              | Seq | ya       | yb       | Seq  | ya       | yb       |
|-------|----------|-----------------|-----|----------|----------|------|----------|----------|
| YW    | 322.1550 | 350.1499        | YWA | 393.1921 | 421.1870 | YWAP | 490.2449 | 518.2398 |
| YWAPT | 591.2926 | 619.2875        | WA  | 230.1288 | 258.1237 | WAP  | 327.1816 | 355.1765 |
| WAPT  | 428.2292 | 456.2241        | AP  | 141.1022 | 169.0972 | APT  | 242.1499 | 270.1448 |
| PT    | 171.1128 | <b>199.1077</b> |     |          |          |      |          |          |

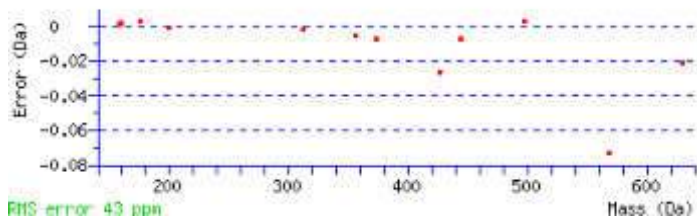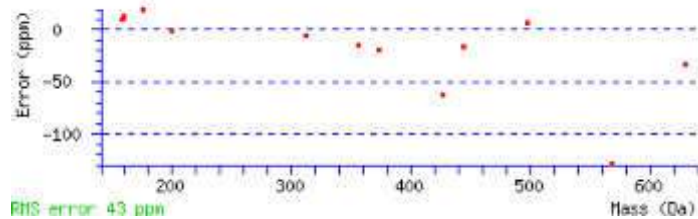

NCBI **BLAST** search of [FYWAPTR](#)

(Parameters: blastp, nr protein database, expect=20000, no filter, PAM30)

Other BLAST [web gateways](#)

#### All matches to this query

| Score | Mr(calc) | Delta   | Sequence                   |
|-------|----------|---------|----------------------------|
| 23.8  | 939.5362 | -0.0899 | <a href="#">RGTRPTR</a>    |
| 21.7  | 939.5250 | -0.0787 | <a href="#">AAATPRTPR</a>  |
| 18.2  | 939.5138 | -0.0674 | <a href="#">LTSAAQPR</a>   |
| 16.0  | 939.4998 | -0.0535 | <a href="#">RGPDSRPR</a>   |
| 14.9  | 939.5138 | -0.0674 | <a href="#">LGASAPATPR</a> |
| 14.6  | 939.5250 | -0.0786 | <a href="#">AAPGEIRR</a>   |
| 14.6  | 939.5362 | -0.0899 | <a href="#">GRPGEIRR</a>   |
| 13.9  | 939.4603 | -0.0139 | <a href="#">FYWAPTR</a>    |
| 13.7  | 939.4709 | -0.0245 | <a href="#">HCAKATPR</a>   |
| 13.2  | 939.5250 | -0.0787 | <a href="#">GRPTSGLPR</a>  |

Mascot: <http://www.matrixscience.com/>



# Mascot Search Results

## Peptide View **Spot no 67**

### MS/MS Fragmentation of **VYDDEVRK**

Found in **gi|8918361** in **NCBI**nr, RuBisCO activase small isoform precursor [Oryza sativa]

Match to Query 19: 1022.497624 from(1023.504900,1+) intensity(0.0000) index(7)

Title: Label: D4, Spot\_Id: 219725, Peak\_List\_Id: 225220, MSMS Job\_Run\_Id: 21770, Comment:

Data file C:\Documents and Settings\Administrator\Desktop\farah BHU\spot set plate\Farah-Garima 11May 2013\ppw\_D4\_136842162200.txt

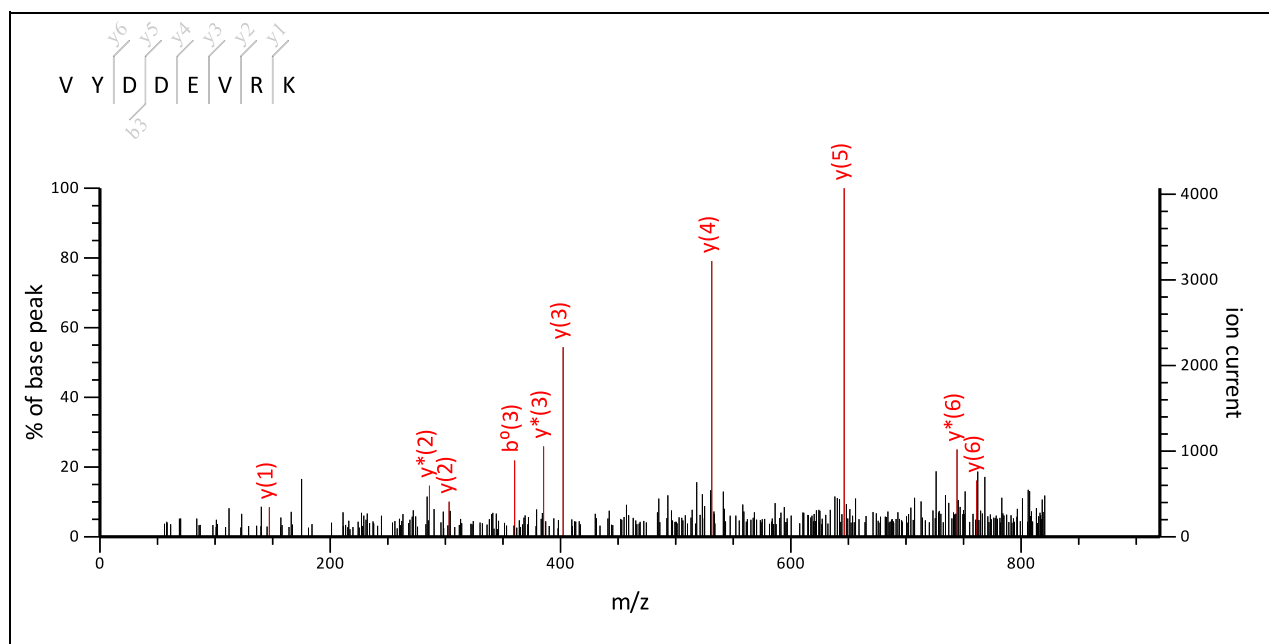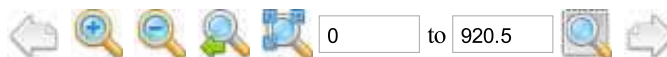

Label all possible matches  Label matches used for scoring

**Monoisotopic mass of neutral peptide Mr(calc):** 1022.5033

**Fixed modifications:** Carbamidomethyl (C) (apply to specified residues or termini only)

**Ions Score:** 30 **Expect:** 2.2

**Matches :** 12/99 fragment ions using 24 most intense peaks ([help](#))

| # | Immon.   | a        | a*       | a <sup>0</sup> | b        | b*       | b <sup>0</sup> | d        | Seq. | v        | w        | y        | y*       | y <sup>0</sup> | # |
|---|----------|----------|----------|----------------|----------|----------|----------------|----------|------|----------|----------|----------|----------|----------------|---|
| 1 | 72.0808  | 72.0808  |          |                | 100.0757 |          |                | 44.0495  | V    |          |          |          |          |                | 8 |
| 2 | 136.0757 | 235.1441 |          |                | 263.1390 |          |                |          | Y    | 816.3846 |          | 924.4421 | 907.4156 | 906.4316       | 7 |
| 3 | 88.0393  | 350.1710 |          | 332.1605       | 378.1660 |          | 360.1554       | 306.1812 | D    | 701.3577 | 700.3624 | 761.3788 | 744.3523 | 743.3682       | 6 |
| 4 | 88.0393  | 465.1980 |          | 447.1874       | 493.1929 |          | 475.1823       | 421.2082 | D    | 586.3307 | 585.3355 | 646.3519 | 629.3253 | 628.3413       | 5 |
| 5 | 102.0550 | 594.2406 |          | 576.2300       | 622.2355 |          | 604.2249       | 536.2351 | E    | 457.2881 | 456.2929 | 531.3249 | 514.2984 | 513.3144       | 4 |
| 6 | 72.0808  | 693.3090 |          | 675.2984       | 721.3039 |          | 703.2933       | 679.2933 | V    | 358.2197 | 371.2401 | 402.2823 | 385.2558 |                | 3 |
| 7 | 129.1135 | 849.4101 | 832.3836 | 831.3995       | 877.4050 | 860.3785 | 859.3945       | 764.3461 | R    | 202.1186 | 201.1234 | 303.2139 | 286.1874 |                | 2 |
| 8 | 101.1073 |          |          |                |          |          |                |          | K    | 74.0237  | 73.0284  | 147.1128 | 130.0863 |                | 1 |

| Seq   | ya       | yb       | Seq   | ya       | yb       | Seq  | ya       | yb       |
|-------|----------|----------|-------|----------|----------|------|----------|----------|
| YD    | 251.1026 | 279.0975 | YDD   | 366.1296 | 394.1245 | YDDE | 495.1722 | 523.1671 |
| YDDEV | 594.2406 | 622.2355 | DD    | 203.0662 | 231.0612 | DDE  | 332.1088 | 360.1038 |
| DDEV  | 431.1773 | 459.1722 | DDEVR | 587.2784 | 615.2733 | DE   | 217.0819 | 245.0768 |
| DEV   | 316.1503 | 344.1452 | DEVR  | 472.2514 | 500.2463 | EV   | 201.1234 | 229.1183 |

|            |          |                 |           |          |          |  |  |  |
|------------|----------|-----------------|-----------|----------|----------|--|--|--|
| <b>EVR</b> | 357.2245 | <b>385.2194</b> | <b>VR</b> | 228.1819 | 256.1768 |  |  |  |
|------------|----------|-----------------|-----------|----------|----------|--|--|--|

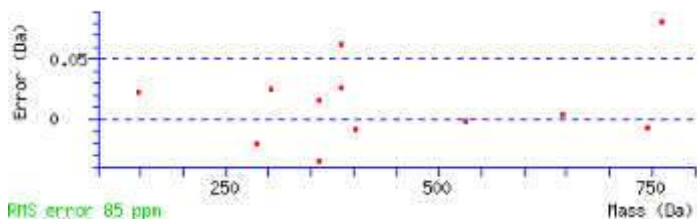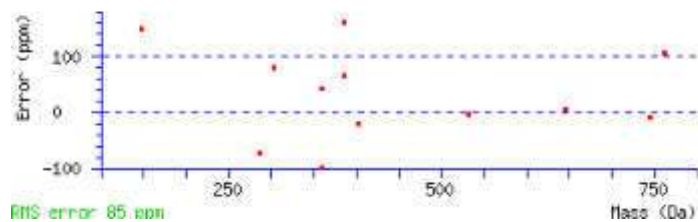

NCBI **BLAST** search of [VYDDEVVK](#)

(Parameters: blastp, nr protein database, expect=20000, no filter, PAM30)

Other BLAST [web gateways](#)

#### All matches to this query

| Score | Mr(calc)  | Delta   | Sequence                   |
|-------|-----------|---------|----------------------------|
| 34.2  | 1022.3975 | 0.1001  | <a href="#">DMDDEVQR</a>   |
| 30.2  | 1022.5033 | -0.0056 | <a href="#">VYDDEVVK</a>   |
| 20.9  | 1022.4702 | 0.0274  | <a href="#">DMTEEVVK</a>   |
| 18.4  | 1022.5145 | -0.0169 | <a href="#">KDAGEGPPPR</a> |
| 17.4  | 1022.5734 | -0.0757 | <a href="#">RVQTHVQR</a>   |
| 16.2  | 1022.4274 | 0.0703  | <a href="#">CTACPTSAR</a>  |
| 15.7  | 1022.5066 | -0.0090 | <a href="#">KGMITDSGSK</a> |
| 14.4  | 1022.5145 | -0.0169 | <a href="#">DYVDRLSR</a>   |
| 14.4  | 1022.5145 | -0.0169 | <a href="#">EFTDRLSR</a>   |
| 14.4  | 1022.5033 | -0.0057 | <a href="#">YVDDIVGSR</a>  |

Mascot: <http://www.matrixscience.com/>





# Mascot Search Results

## Peptide View **Spot no 67**

### MS/MS Fragmentation of **EGPPEFEQPK**

Found in **gi|8918361** in **NCBI nr**, RuBisCO activase small isoform precursor [Oryza sativa]

Match to Query 37: 1156.524424 from(1157.531700,1+) intensity(0.0000) index(14)

Title: Label: D4, Spot\_Id: 219725, Peak\_List\_Id: 225228, MSMS Job\_Run\_Id: 21770, Comment:

Data file C:\Documents and Settings\Administrator\Desktop\farah BHU\spot set plate\Farah-Garima 11May 2013\ppw\_D4\_136842162200.txt

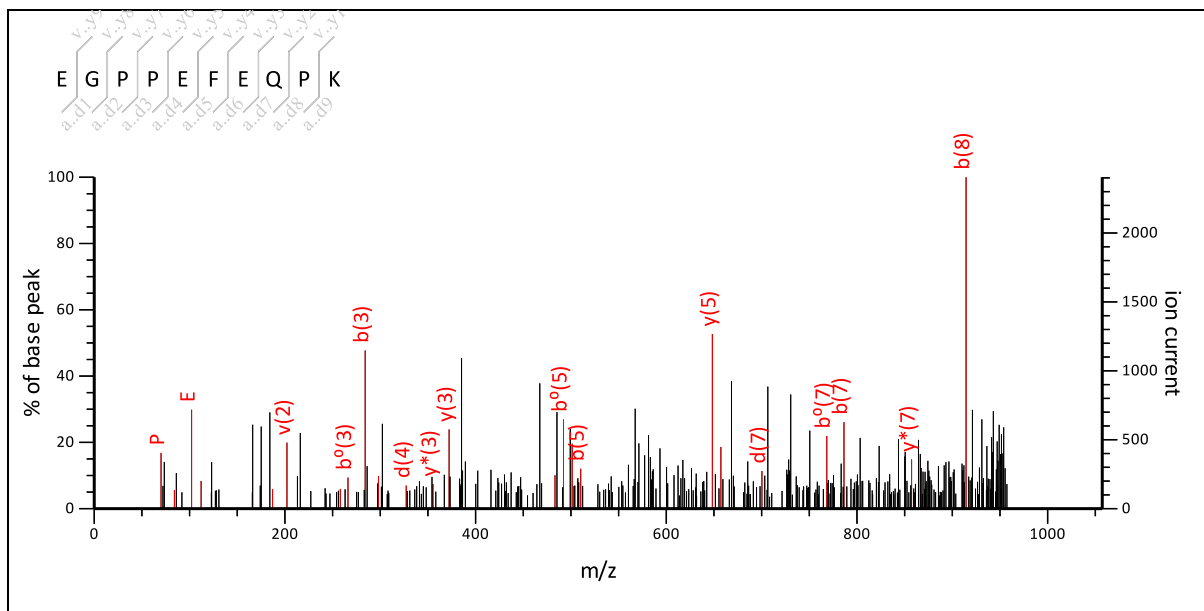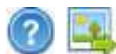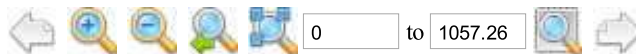

Label all possible matches  Label matches used for scoring

Monoisotopic mass of neutral peptide Mr(calc): 1156.5400

Fixed modifications: Carbamidomethyl (C) (apply to specified residues or termini only)

Ions Score: 10 Expect: 1.6e+02

Matches: 32/142 fragment ions using 90 most intense peaks ([help](#))

| #  | Immon.   | a        | a*       | a <sup>0</sup> | b         | b*       | b <sup>0</sup> | d        | Seq. | v        | w        | y         | y*        | y <sup>0</sup> | #  |
|----|----------|----------|----------|----------------|-----------|----------|----------------|----------|------|----------|----------|-----------|-----------|----------------|----|
| 1  | 102.0550 | 102.0550 |          | 84.0444        | 130.0499  |          | 112.0393       | 44.0495  | E    |          |          |           |           |                | 10 |
| 2  | 30.0338  | 159.0764 |          | 141.0659       | 187.0713  |          | 169.0608       |          | G    |          |          | 1028.5047 | 1011.4782 | 1010.4942      | 9  |
| 3  | 70.0651  | 256.1292 |          | 238.1186       | 284.1241  |          | 266.1135       | 230.1135 | P    | 929.4363 | 928.4411 | 971.4833  | 954.4567  | 953.4727       | 8  |
| 4  | 70.0651  | 353.1819 |          | 335.1714       | 381.1769  |          | 363.1663       | 327.1663 | P    | 832.3836 | 831.3883 | 874.4305  | 857.4040  | 856.4199       | 7  |
| 5  | 102.0550 | 482.2245 |          | 464.2140       | 510.2195  |          | 492.2089       | 424.2191 | E    | 703.3410 | 702.3457 | 777.3777  | 760.3512  | 759.3672       | 6  |
| 6  | 120.0808 | 629.2930 |          | 611.2824       | 657.2879  |          | 639.2773       |          | F    | 556.2726 |          | 648.3352  | 631.3086  | 630.3246       | 5  |
| 7  | 102.0550 | 758.3355 |          | 740.3250       | 786.3305  |          | 768.3199       | 700.3301 | E    | 427.2300 | 426.2347 | 501.2667  | 484.2402  | 483.2562       | 4  |
| 8  | 101.0709 | 886.3941 | 869.3676 | 868.3836       | 914.3890  | 897.3625 | 896.3785       | 829.3727 | Q    | 299.1714 | 298.1761 | 372.2241  | 355.1976  |                | 3  |
| 9  | 70.0651  | 983.4469 | 966.4203 | 965.4363       | 1011.4418 | 994.4153 | 993.4312       | 957.4312 | P    | 202.1186 | 201.1234 | 244.1656  | 227.1390  |                | 2  |
| 10 | 101.1073 |          |          |                |           |          |                |          | K    | 74.0237  | 73.0284  | 147.1128  | 130.0863  |                | 1  |

| Seq   | ya       | yb       | Seq    | ya       | yb       | Seq   | ya       | yb       |
|-------|----------|----------|--------|----------|----------|-------|----------|----------|
| GP    | 127.0866 | 155.0815 | GPP    | 224.1394 | 252.1343 | GPPE  | 353.1819 | 381.1769 |
| GPPEF | 500.2504 | 528.2453 | GPPEFE | 629.2930 | 657.2879 | PP    | 167.1179 | 195.1128 |
| PPE   | 296.1605 | 324.1554 | PPEF   | 443.2289 | 471.2238 | PPEFE | 572.2715 | 600.2664 |
| PE    | 199.1077 | 227.1026 | PEF    | 346.1761 | 374.1710 | PEFE  | 475.2187 | 503.2136 |

|                       |                 |                 |                       |          |          |                     |          |                 |
|-----------------------|-----------------|-----------------|-----------------------|----------|----------|---------------------|----------|-----------------|
| <a href="#">PEFEQ</a> | 603.2773        | 631.2722        | <a href="#">EF</a>    | 249.1234 | 277.1183 | <a href="#">EFE</a> | 378.1660 | 406.1609        |
| <a href="#">EFEQ</a>  | 506.2245        | 534.2195        | <a href="#">EFEQP</a> | 603.2773 | 631.2722 | <a href="#">FE</a>  | 249.1234 | 277.1183        |
| <a href="#">FEQ</a>   | 377.1819        | 405.1769        | <a href="#">FEQP</a>  | 474.2347 | 502.2296 | <a href="#">EQ</a>  | 230.1135 | <b>258.1084</b> |
| <a href="#">EQP</a>   | <b>327.1663</b> | <b>355.1612</b> | <a href="#">QP</a>    | 198.1237 | 226.1186 |                     |          |                 |

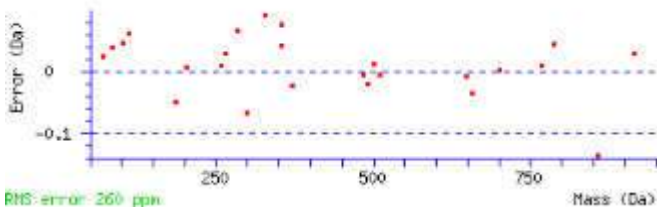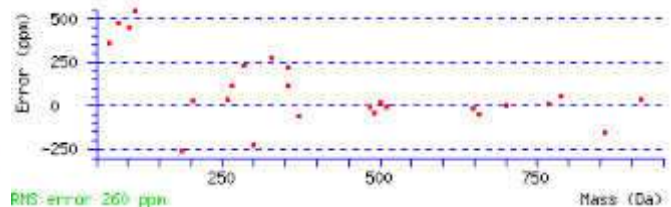

NCBI **BLAST** search of [EGPPEFEQPK](#)

(Parameters: blastp, nr protein database, expect=20000, no filter, PAM30)

Other BLAST [web gateways](#)

#### All matches to this query

| Score | Mr(calcd) | Delta   | Sequence                      |
|-------|-----------|---------|-------------------------------|
| 14.8  | 1156.6088 | -0.0844 | <a href="#">EKDGAVQVSPK</a>   |
| 14.8  | 1156.5585 | -0.0340 | <a href="#">EOGADSPAARR</a>   |
| 13.3  | 1156.5989 | -0.0745 | <a href="#">QSVGLYTHPR</a>    |
| 12.4  | 1156.5811 | -0.0567 | <a href="#">GWAGLOCIPR</a>    |
| 12.2  | 1156.5877 | -0.0632 | <a href="#">AWDQSPTPKK</a>    |
| 10.9  | 1156.6200 | -0.0956 | <a href="#">TALSKGNNQPK</a>   |
| 10.4  | 1156.4852 | 0.0392  | <a href="#">MNKSGGEMSK</a>    |
| 10.3  | 1156.5400 | -0.0156 | <a href="#">EGPPEFEQPK</a>    |
| 10.2  | 1156.5546 | -0.0302 | <a href="#">LMDPEGPNLR</a>    |
| 9.7   | 1156.6200 | -0.0956 | <a href="#">AVSGGLA EGLQR</a> |

Mascot: <http://www.matrixscience.com/>


**Mascot Search Results**
**Peptide View Spot no 67**
MS/MS Fragmentation of **SFQCELVFAK**Found in **gi|8918361** in **NCBI**, RuBisCO activase small isoform precursor [Oryza sativa]

Match to Query 45: 1227.577724 from(1228.585000,1+) intensity(0.0000) index(17)

Title: Label: D4, Spot\_Id: 219725, Peak\_List\_Id: 225215, MSMS Job\_Run\_Id: 21770, Comment:

Data file C:\Documents and Settings\Administrator\Desktop\farah BHU\spot set plate\Farah-Garima 11May 2013\ppw\_D4\_136842162200.txt

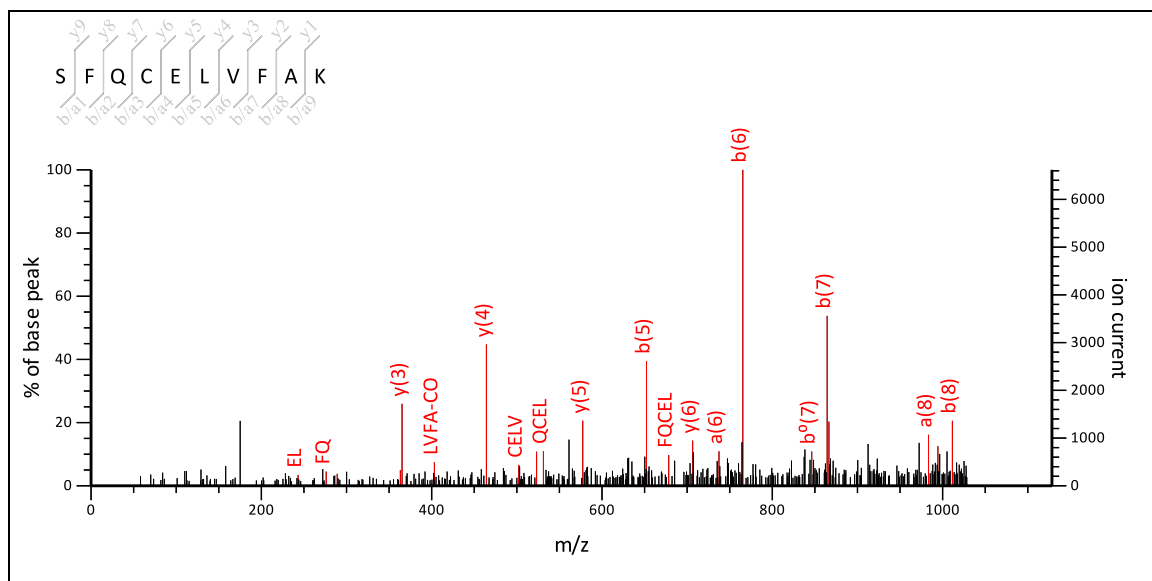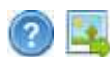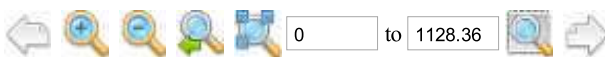Label all possible matches  Label matches used for scoring Monoisotopic mass of neutral peptide **Mr(calc)**: 1227.5958

Fixed modifications: Carbamidomethyl (C) (apply to specified residues or termini only)

Ions Score: 36 **Expect**: 0.48Matches : 26/148 fragment ions using 40 most intense peaks ([help](#))

| #  | Immon.   | a               | a*        | a <sup>0</sup> | b                | b*              | b <sup>0</sup>  | d        | Seq. | v         | w        | y               | y*        | y <sup>0</sup> | #  |
|----|----------|-----------------|-----------|----------------|------------------|-----------------|-----------------|----------|------|-----------|----------|-----------------|-----------|----------------|----|
| 1  | 60.0444  | 60.0444         |           | 42.0338        | 88.0393          |                 | 70.0287         | 44.0495  | S    |           |          |                 |           |                | 10 |
| 2  | 120.0808 | 207.1128        |           | 189.1022       | 235.1077         |                 | 217.0972        |          | F    | 1049.5084 |          | 1141.5710       | 1124.5445 | 1123.5605      | 9  |
| 3  | 101.0709 | 335.1714        | 318.1448  | 317.1608       | <b>363.1663</b>  | 346.1397        | 345.1557        | 278.1499 | Q    | 921.4499  | 920.4546 | <b>994.5026</b> | 977.4761  | 976.4921       | 8  |
| 4  | 133.0430 | 495.2020        | 478.1755  | 477.1915       | <b>523.1969</b>  | 506.1704        | 505.1864        | 406.2085 | C    | 761.4192  | 760.4240 | <b>866.4441</b> | 849.4175  | 848.4335       | 7  |
| 5  | 102.0550 | 624.2446        | 607.2181  | 606.2341       | <b>652.2395</b>  | 635.2130        | 634.2290        | 566.2391 | E    | 632.3766  | 631.3814 | <b>706.4134</b> | 689.3869  | 688.4028       | 6  |
| 6  | 86.0964  | <b>737.3287</b> | 720.3021  | 719.3181       | <b>765.3236</b>  | 748.2971        | 747.3130        | 695.2817 | L    | 519.2926  | 518.2973 | <b>577.3708</b> | 560.3443  |                | 5  |
| 7  | 72.0808  | 836.3971        | 819.3706  | 818.3865       | <b>864.3920</b>  | 847.3655        | <b>846.3815</b> | 822.3815 | V    | 420.2241  | 433.2445 | <b>464.2867</b> | 447.2602  |                | 4  |
| 8  | 120.0808 | <b>983.4655</b> | 966.4390  | 965.4549       | <b>1011.4604</b> | <b>994.4339</b> | 993.4499        |          | F    | 273.1557  |          | <b>365.2183</b> | 348.1918  |                | 3  |
| 9  | 44.0495  | 1054.5026       | 1037.4761 | 1036.4921      | 1082.4975        | 1065.4710       | 1064.4870       |          | A    | 202.1186  |          | 218.1499        | 201.1234  |                | 2  |
| 10 | 101.1073 |                 |           |                |                  |                 |                 |          | K    | 74.0237   | 73.0284  | 147.1128        | 130.0863  |                | 1  |

| Seq    | ya              | yb              | Seq   | ya              | yb              | Seq   | ya       | yb       |
|--------|-----------------|-----------------|-------|-----------------|-----------------|-------|----------|----------|
| FQ     | 248.1394        | <b>276.1343</b> | FQC   | 408.1700        | 436.1649        | FQCE  | 537.2126 | 565.2075 |
| FQCEL  | <b>650.2967</b> | <b>678.2916</b> | QC    | 261.1016        | <b>289.0965</b> | QCE   | 390.1442 | 418.1391 |
| QCEL   | 503.2282        | <b>531.2232</b> | QCELV | 602.2967        | 630.2916        | CE    | 262.0856 | 290.0805 |
| CEL    | 375.1697        | <b>403.1646</b> | CELV  | 474.2381        | <b>502.2330</b> | CELVF | 621.3065 | 649.3014 |
| CELVFA | 692.3436        | 720.3385        | EL    | 215.1390        | <b>243.1339</b> | ELV   | 314.2074 | 342.2023 |
| ELVF   | 461.2758        | 489.2708        | ELVFA | 532.3130        | 560.3079        | LV    | 185.1648 | 213.1598 |
| LVF    | 332.2333        | 360.2282        | LVFA  | <b>403.2704</b> | <b>431.2653</b> | VF    | 219.1492 | 247.1441 |

|     |          |          |    |          |          |  |  |  |
|-----|----------|----------|----|----------|----------|--|--|--|
| VFA | 290.1863 | 318.1812 | FA | 191.1179 | 219.1128 |  |  |  |
|-----|----------|----------|----|----------|----------|--|--|--|

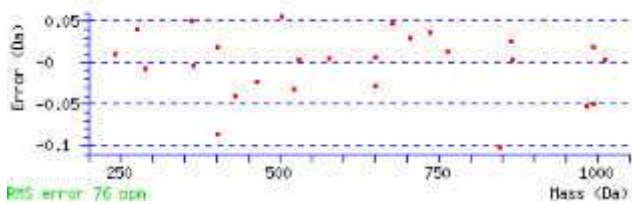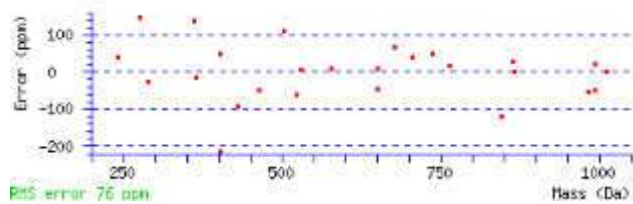

NCBI BLAST search of [SFOCELVFAK](#)

(Parameters: blastp, nr protein database, expect=20000, no filter, PAM30)

Other BLAST [web gateways](#)

#### All matches to this query

| Score | Mr(calc)  | Delta   | Sequence                    |
|-------|-----------|---------|-----------------------------|
| 37.4  | 1227.5628 | 0.0149  | <a href="#">SFOCELVMAK</a>  |
| 36.1  | 1227.5958 | -0.0181 | <a href="#">SFOCELVFAK</a>  |
| 36.0  | 1227.6208 | -0.0430 | <a href="#">KVHPESSTSTR</a> |
| 29.6  | 1227.5628 | 0.0149  | <a href="#">SFOCELVMSK</a>  |
| 29.4  | 1227.5376 | 0.0401  | <a href="#">FGCVSTMASPR</a> |
| 24.2  | 1227.5992 | -0.0214 | <a href="#">GCFVIKTEMK</a>  |
| 23.3  | 1227.6248 | -0.0470 | <a href="#">HKPTSESPEAK</a> |
| 23.2  | 1227.4860 | 0.0917  | <a href="#">ECSSLTSECR</a>  |
| 20.8  | 1227.5488 | 0.0289  | <a href="#">RDCYGLAMAR</a>  |
| 20.1  | 1227.6499 | -0.0722 | <a href="#">KFSVDISYAAK</a> |

Mascot: <http://www.matrixscience.com/>


**Mascot Search Results**
**Peptide View Spot no 67**
**MS/MS Fragmentation of FYWAPTRDDR**

 Found in **gi|8918361** in **NCBI**nr, RuBisCO activase small isoform precursor [Oryza sativa]

Match to Query 58: 1325.603924 from(1326.611200,1+) intensity(0.0000) index(20)

Title: Label: D4, Spot\_Id: 219725, Peak\_List\_Id: 225217, MSMS Job\_Run\_Id: 21770, Comment:

Data file C:\Documents and Settings\Administrator\Desktop\farah BHU\spot set plate\Farah-Garima 11May 2013\ppw\_D4\_136842162200.txt

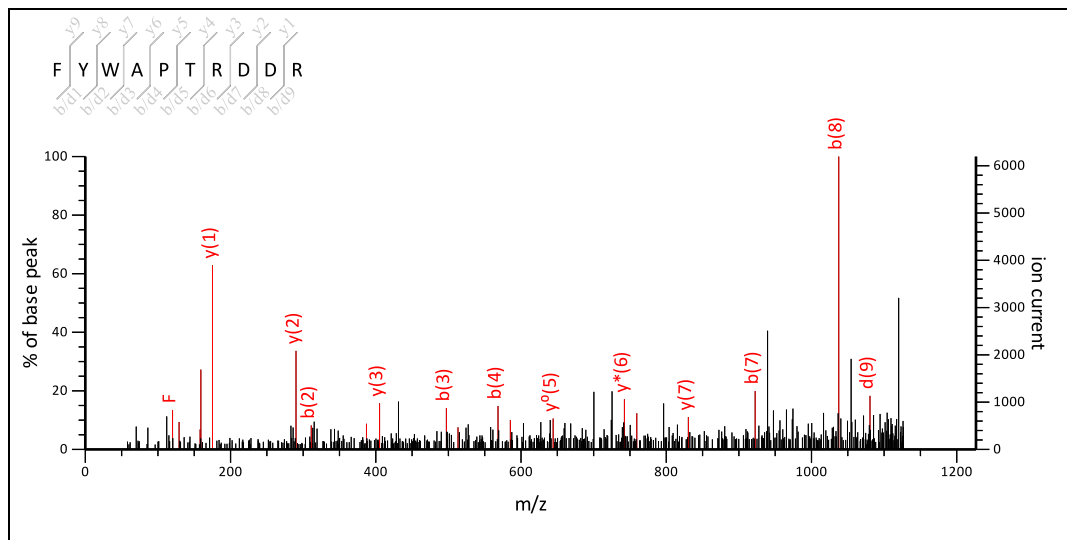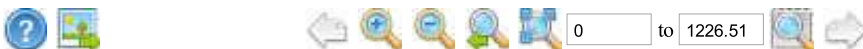
 Label all possible matches  Label matches used for scoring 

Monoisotopic mass of neutral peptide Mr(calc): 1325.6153

Fixed modifications: Carbamidomethyl (C) (apply to specified residues or termini only)

Ions Score: 27 Expect: 3.7

 Matches : 23/138 fragment ions using 33 most intense peaks ([help](#))

| #  | Immon.   | a         | a*        | a <sup>0</sup> | b         | b*        | b <sup>0</sup> | d         | d'       | Seq. | v         | w        | w'       | y         | y*        | y     |
|----|----------|-----------|-----------|----------------|-----------|-----------|----------------|-----------|----------|------|-----------|----------|----------|-----------|-----------|-------|
| 1  | 120.0808 | 120.0808  |           |                | 148.0757  |           |                | 44.0495   |          | F    |           |          |          |           |           |       |
| 2  | 136.0757 | 283.1441  |           |                | 311.1390  |           |                |           |          | Y    | 1071.4966 |          |          | 1179.5541 | 1162.5276 | 1161. |
| 3  | 159.0917 | 469.2234  |           |                | 497.2183  |           |                |           |          | W    | 885.4173  |          |          | 1016.4908 | 999.4643  | 998.  |
| 4  | 44.0495  | 540.2605  |           |                | 568.2554  |           |                |           |          | A    | 814.3802  |          |          | 830.4115  | 813.3850  | 812.  |
| 5  | 70.0651  | 637.3133  |           |                | 665.3082  |           |                | 611.2976  |          | P    | 717.3274  | 716.3322 |          | 759.3744  | 742.3478  | 741.  |
| 6  | 74.0600  | 738.3610  |           | 720.3504       | 766.3559  |           | 748.3453       | 722.3661  | 724.3453 | T    | 616.2798  | 629.3002 | 631.2794 | 662.3216  | 645.2951  | 644.  |
| 7  | 129.1135 | 894.4621  | 877.4355  | 876.4515       | 922.4570  | 905.4305  | 904.4464       | 809.3981  |          | R    | 460.1787  | 459.1834 |          | 561.2739  | 544.2474  | 543.  |
| 8  | 88.0393  | 1009.4890 | 992.4625  | 991.4785       | 1037.4839 | 1020.4574 | 1019.4734      | 965.4992  |          | D    | 345.1517  | 344.1565 |          | 405.1728  | 388.1463  | 387.  |
| 9  | 88.0393  | 1124.5160 | 1107.4894 | 1106.5054      | 1152.5109 | 1135.4843 | 1134.5003      | 1080.5261 |          | D    | 230.1248  | 229.1295 |          | 290.1459  | 273.1193  | 272.  |
| 10 | 129.1135 |           |           |                |           |           |                |           |          | R    | 74.0237   | 73.0284  |          | 175.1190  | 158.0924  |       |

| Seq   | ya       | yb       | Seq    | ya       | yb       | Seq    | ya       | yb       |
|-------|----------|----------|--------|----------|----------|--------|----------|----------|
| YW    | 322.1550 | 350.1499 | YWAP   | 393.1921 | 421.1870 | YWAP   | 490.2449 | 518.2398 |
| YWAPT | 591.2926 | 619.2875 | WA     | 230.1288 | 258.1237 | WAP    | 327.1816 | 355.1765 |
| WAPT  | 428.2292 | 456.2241 | WAPTR  | 584.3303 | 612.3253 | WAPTRD | 699.3573 | 727.3522 |
| AP    | 141.1022 | 169.0972 | APT    | 242.1499 | 270.1448 | APTR   | 398.2510 | 426.2459 |
| APTRD | 513.2780 | 541.2729 | APTRDD | 628.3049 | 656.2998 | PT     | 171.1128 | 199.1077 |
| PTR   | 327.2139 | 355.2088 | PTRD   | 442.2409 | 470.2358 | PTRDD  | 557.2678 | 585.2627 |
| TR    | 230.1612 | 258.1561 | TRD    | 345.1881 | 373.1830 | TRDD   | 460.2150 | 488.2100 |
| RD    | 244.1404 | 272.1353 | RDD    | 359.1674 | 387.1623 | DD     | 203.0662 | 231.0612 |

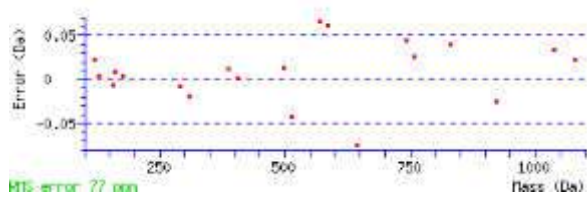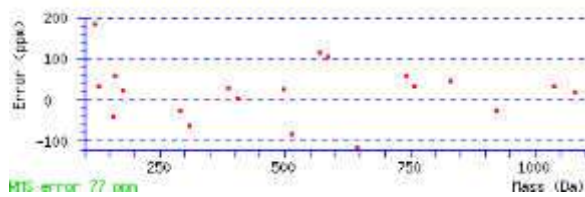

NCBI **BLAST** search of [FYWAPTRDDR](#)

(Parameters: blastp, nr protein database, expect=20000, no filter, PAM30)

Other BLAST [web gateways](#)

#### All matches to this query

| Score | Mr(calc)  | Delta   | Sequence                      |
|-------|-----------|---------|-------------------------------|
| 26.9  | 1325.6153 | -0.0114 | <a href="#">FYWAPTRDDR</a>    |
| 16.2  | 1325.5710 | 0.0329  | <a href="#">MOVWVDYDDR</a>    |
| 15.2  | 1325.5921 | 0.0118  | <a href="#">KMETPPSSYDR</a>   |
| 15.1  | 1325.6186 | -0.0147 | <a href="#">MWAYNDVAKGR</a>   |
| 14.7  | 1325.6252 | -0.0212 | <a href="#">GIPYLNTYDDR</a>   |
| 14.0  | 1325.6649 | -0.0610 | <a href="#">METIKVTSFDR</a>   |
| 13.8  | 1325.7052 | -0.1012 | <a href="#">TPDAAVLGRSPSR</a> |
| 13.7  | 1325.6616 | -0.0576 | <a href="#">TLFLVNAYDDR</a>   |
| 13.1  | 1325.6954 | -0.0915 | <a href="#">FFMWLALKDR</a>    |
| 12.5  | 1325.7092 | -0.1053 | <a href="#">VFALHADAFLDR</a>  |

Mascot: <http://www.matrixscience.com/>

MATRIX SCIENCE Mascot Search Results

Peptide View Spot no 67

MS/MS Fragmentation of WVSDTGVENIGKR

Found in **gi8918361** in **NCBInr**, RuBisCO activase small isoform precursor [Oryza sativa]

Match to Query 69: 1459.736224 from(1460.743500,1+) intensity(0.0000) index(24)

Title: Label: D4, Spot\_Id: 219725, Peak\_List\_Id: 225216, MSMS Job\_Run\_Id: 21770, Comment:

Data file C:\Documents and Settings\Administrator\Desktop\farah BHU\spot set plate\Farah-Garima 11May 2013\ppw\_D4\_136842162200.txt

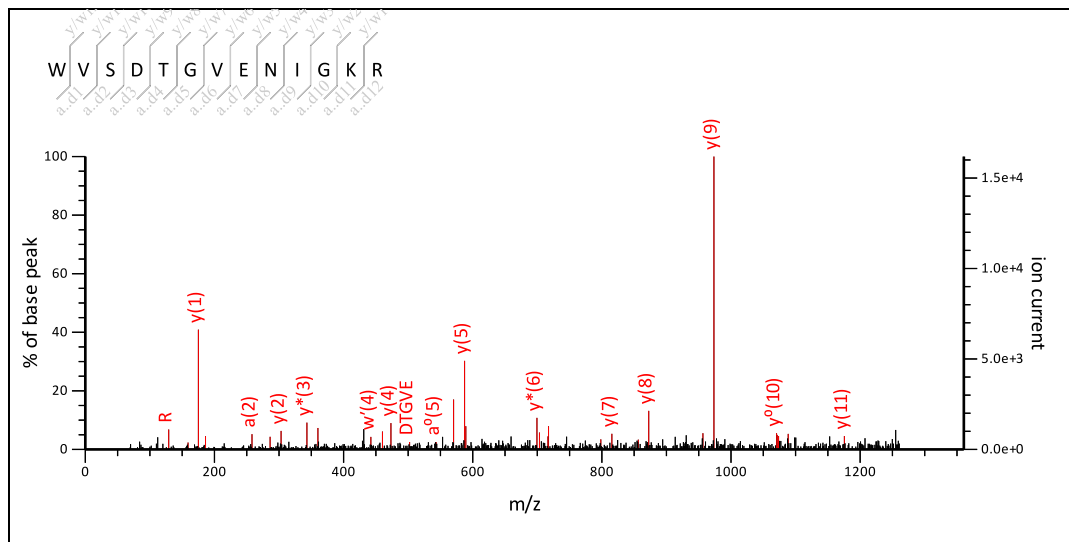

Navigation icons and search range: 0 to 1360.59

Label all possible matches  Label matches used for scoring

Monoisotopic mass of neutral peptide Mr(calc): 1459.7419

Fixed modifications: Carbamidomethyl (C) (apply to specified residues or termini only)

Ions Score: 85 Expect: 6.9e-06

Matches : 49/217 fragment ions using 48 most intense peaks (help)

#0000FF>13

| #  | Immon.   | a         | a*        | a <sup>0</sup> | b         | b*        | b <sup>0</sup> | d         | d'        | Seq. | v         | w         | w'       | y         | y*        |
|----|----------|-----------|-----------|----------------|-----------|-----------|----------------|-----------|-----------|------|-----------|-----------|----------|-----------|-----------|
| 1  | 159.0917 | 159.0917  |           |                | 187.0866  |           |                | 44.0495   |           | W    |           |           |          |           |           |
| 2  | 72.0808  | 258.1601  |           |                | 286.1550  |           |                | 244.1444  |           | V    | 1230.6073 | 1243.6277 |          | 1274.6699 | 1257.6434 |
| 3  | 60.0444  | 345.1921  |           | 327.1816       | 373.1870  |           | 355.1765       | 329.1972  |           | S    | 1143.5753 | 1142.5800 |          | 1175.6015 | 1158.5749 |
| 4  | 88.0393  | 460.2191  |           | 442.2085       | 488.2140  |           | 470.2034       | 416.2292  |           | D    | 1028.5483 | 1027.5531 |          | 1088.5695 | 1071.5429 |
| 5  | 74.0600  | 561.2667  |           | 543.2562       | 589.2617  |           | 571.2511       | 545.2718  | 547.2511  | T    | 927.5007  | 940.5211  | 942.5003 | 973.5425  | 956.5160  |
| 6  | 30.0338  | 618.2882  |           | 600.2776       | 646.2831  |           | 628.2726       |           |           | G    |           |           |          | 872.4948  | 855.4683  |
| 7  | 72.0808  | 717.3566  |           | 699.3461       | 745.3515  |           | 727.3410       | 703.3410  |           | V    | 771.4108  | 784.4312  |          | 815.4734  | 798.4468  |
| 8  | 102.0550 | 846.3992  |           | 828.3886       | 874.3941  |           | 856.3836       | 788.3937  |           | E    | 642.3682  | 641.3729  |          | 716.4050  | 699.3784  |
| 9  | 87.0553  | 960.4421  | 943.4156  | 942.4316       | 988.4371  | 971.4105  | 970.4265       | 917.4363  |           | N    | 528.3253  | 527.3300  |          | 587.3624  | 570.3358  |
| 10 | 86.0964  | 1073.5262 | 1056.4997 | 1055.5156      | 1101.5211 | 1084.4946 | 1083.5105      | 1045.4949 | 1059.5105 | I    | 415.2412  | 129.1135  |          |           |           |

| Seq    | ya       | yb        | Seq       | ya        | yb        | Seq       | ya        | yb        |
|--------|----------|-----------|-----------|-----------|-----------|-----------|-----------|-----------|
| VS     | 159.1128 | 187.1077  | VSD       | 274.1397  | 302.1347  | VSDT      | 375.1874  | 403.1823  |
| VSDTG  | 432.2089 | 460.2038  | VSDTGV    | 531.2773  | 559.2722  | VSDTGVVE  | 660.3199  | 688.3148  |
|        |          |           |           |           |           |           | 428.2616  | 442.2772  |
|        |          |           |           |           |           |           |           | 473.3194  |
|        |          |           |           |           |           |           | 456.2929  | 4         |
| 11     | 30.0338  | 1130.5477 | 1113.5211 | 1112.5371 | 1158.5426 | 1141.5160 | 1140.5320 |           |
|        |          |           |           |           |           |           |           | G         |
|        |          |           |           |           |           |           |           | 360.2354  |
|        |          |           |           |           |           |           |           | 343.2088  |
| 12     | 101.1073 | 1258.6426 | 1241.6161 | 1240.6321 | 1286.6375 | 1269.6110 | 1268.6270 | 1201.5848 |
|        |          |           |           |           |           |           |           | K         |
|        |          |           |           |           |           |           |           | 230.1248  |
|        |          |           |           |           |           |           |           | 229.1295  |
|        |          |           |           |           |           |           |           | 303.2139  |
|        |          |           |           |           |           |           |           | 286.1874  |
| 2      |          |           |           |           |           |           |           |           |
| SD     | 175.0713 | 203.0662  | SDT       | 276.1190  | 304.1139  | SDTG      | 333.1405  | 361.1354  |
| SDTGV  | 432.2089 | 460.2038  | SDTGVVE   | 561.2515  | 589.2464  | SDTGVEN   | 675.2944  | 703.2893  |
| DT     | 189.0870 | 217.0819  | DTG       | 246.1084  | 274.1034  | DTGV      | 345.1769  | 373.1718  |
| DTGVE  | 474.2195 | 502.2144  | DTGVEN    | 588.2624  | 616.2573  | TG        | 131.0815  | 159.0764  |
| TGV    | 230.1499 | 258.1448  | TGVE      | 359.1925  | 387.1874  | TGVEN     | 473.2354  | 501.2304  |
| TGVENI | 586.3195 | 614.3144  | TGVENIG   | 643.3410  | 671.3359  | GV        | 129.1022  | 157.0972  |



|               |          |          |                |          |          |              |          |          |
|---------------|----------|----------|----------------|----------|----------|--------------|----------|----------|
| <b>GVE</b>    | 258.1448 | 286.1397 | <b>GVEN</b>    | 372.1878 | 400.1827 | <b>GVENI</b> | 485.2718 | 513.2667 |
| <b>GVENIG</b> | 542.2933 | 570.2882 | <b>GVENIGK</b> | 670.3882 | 698.3832 | <b>VE</b>    | 201.1234 | 229.1183 |
| <b>VEN</b>    | 315.1663 | 343.1612 | <b>VENI</b>    | 428.2504 | 456.2453 | <b>VENIG</b> | 485.2718 | 513.2667 |
| <b>VENIGK</b> | 613.3668 | 641.3617 | <b>EN</b>      | 216.0979 | 244.0928 | <b>ENI</b>   | 329.1819 | 357.1769 |
| <b>ENIG</b>   | 386.2034 | 414.1983 | <b>ENIGK</b>   | 514.2984 | 542.2933 | <b>NI</b>    | 200.1394 | 228.1343 |
| <b>NIG</b>    | 257.1608 | 285.1557 | <b>NIGK</b>    | 385.2558 | 413.2507 | <b>IG</b>    | 143.1179 | 171.1128 |
| <b>IGK</b>    | 271.2129 | 299.2078 | <b>GK</b>      | 158.1288 | 186.1237 |              |          |          |

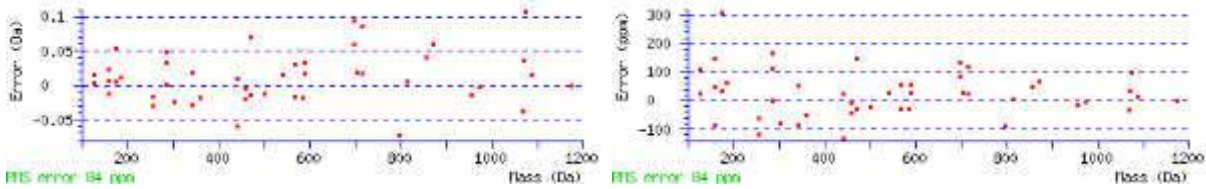

NCBI BLAST search of [WVSDTGVENIGKR](#)

(Parameters: blastp, nr protein database, expect=20000, no filter, PAM30)

Other BLAST [web gateways](#)

#### All matches to this query

| Score | Mr(calc)  | Delta   | Sequence                         |
|-------|-----------|---------|----------------------------------|
| 84.9  | 1459.7419 | -0.0057 | <a href="#">WVSDTGVENIGKR</a>    |
| 30.6  | 1459.6652 | 0.0711  | <a href="#">TDEAGGVNOTGAGGAR</a> |
| 30.5  | 1459.7783 | -0.0421 | <a href="#">WVTSTGIENIGKR</a>    |
| 25.6  | 1459.6653 | 0.0709  | <a href="#">YYPTTSPLSMER</a>     |
| 21.4  | 1459.7267 | 0.0095  | <a href="#">ATDITINGGGTIDGR</a>  |
| 21.3  | 1459.7630 | -0.0268 | <a href="#">TALSDVKLNESOR</a>    |
| 20.0  | 1459.6903 | 0.0459  | <a href="#">GNNTDSGVDLEAIR</a>   |
| 19.9  | 1459.7419 | -0.0057 | <a href="#">ERYVGAPVDLEGR</a>    |
| 19.1  | 1459.7089 | 0.0273  | <a href="#">ADVLAQQAGMDIGR</a>   |
| 18.9  | 1459.6539 | 0.0823  | <a href="#">EADEGANAGADSVVR</a>  |

Mascot: <http://www.matrixscience.com/>

**MATRIX SCIENCE Mascot Search Results**

**Peptide View Spot no 67**

MS/MS Fragmentation of **GLAYDISDDQQDITR**

Found in **gi8918361** in **NCBInr**, RuBisCO activase small isoform precursor [Oryza sativa]

Match to Query 79: 1708.780824 from(1709.788100,1+) intensity(0.0000) index(27)

Title: Label: D4, Spot\_Id: 219725, Peak\_List\_Id: 225214, MSMS Job\_Run\_Id: 21770, Comment:

Data file C:\Documents and Settings\Administrator\Desktop\farah BHU\spot set plate\Farah-Garima 11May 2013\ppw\_D4\_136842162200.txt

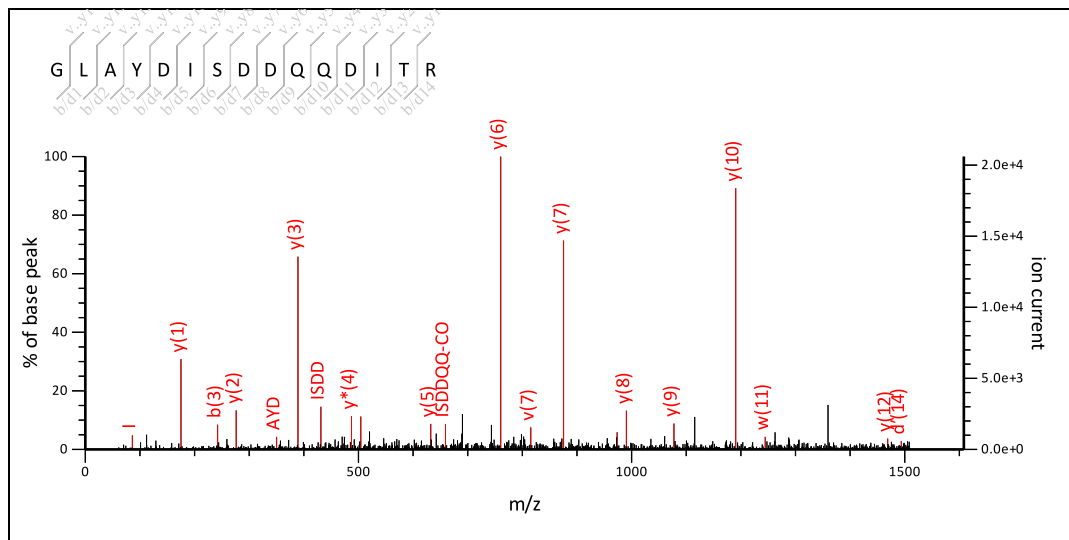

Navigation icons: Home, Back, Forward, Search, Print, etc. Range: 0 to 1608.15

Label all possible matches  Label matches used for scoring

Monoisotopic mass of neutral peptide Mr(calc): 1708.7904

Fixed modifications: Carbamidomethyl (C) (apply to specified residues or termini only)

Ions Score: 87 Expect: 3.4e-06

Matches : 27/255 fragment ions using 30 most intense peaks (help)

| #  | Immon.   | a         | a*        | a <sup>0</sup> | b         | b*        | b <sup>0</sup> | d         | d'        | Seq. | v         | w         | w'        | y         | y*        |
|----|----------|-----------|-----------|----------------|-----------|-----------|----------------|-----------|-----------|------|-----------|-----------|-----------|-----------|-----------|
| 1  | 30.0338  | 30.0338   |           |                | 58.0287   |           |                | 44.0495   |           | G    |           |           |           |           |           |
| 2  | 86.0964  | 143.1179  |           |                | 171.1128  |           |                | 101.0709  |           | L    | 1594.6980 | 1593.7027 |           | 1652.7762 | 1635.7497 |
| 3  | 44.0495  | 214.1550  |           |                | 242.1499  |           |                |           |           | A    | 1523.6609 |           |           | 1539.6922 | 1522.6656 |
| 4  | 136.0757 | 377.2183  |           |                | 405.2132  |           |                |           |           | Y    | 1360.5975 |           |           | 1468.6550 | 1451.6285 |
| 5  | 88.0393  | 492.2453  |           | 474.2347       | 520.2402  |           | 502.2296       | 448.2554  |           | D    | 1245.5706 | 1244.5753 |           | 1305.5917 | 1288.5652 |
| 6  | 86.0964  | 605.3293  |           | 587.3188       | 633.3243  |           | 615.3137       | 577.2980  | 591.3137  | I    | 1132.4865 | 1145.5069 | 1159.5226 | 1190.5648 | 1173.5382 |
| 7  | 60.0444  | 692.3614  |           | 674.3508       | 720.3563  |           | 702.3457       | 676.3665  |           | S    | 1045.4545 | 1044.4592 |           | 1077.4807 | 1060.4542 |
| 8  | 88.0393  | 807.3883  |           | 789.3777       | 835.3832  |           | 817.3727       | 763.3985  |           | D    | 930.4276  | 929.4323  |           | 990.4487  | 973.4221  |
| 9  | 88.0393  | 922.4153  |           | 904.4047       | 950.4102  |           | 932.3996       | 878.4254  |           | D    | 815.4006  | 814.4054  |           | 875.4217  | 858.3952  |
| 10 | 101.0709 | 1050.4738 | 1033.4473 | 1032.4633      | 1078.4687 | 1061.4422 | 1060.4582      | 993.4524  |           | Q    | 687.3420  | 686.3468  |           | 760.3948  | 743.3682  |
| 11 | 101.0709 | 1178.5324 | 1161.5059 | 1160.5218      | 1206.5273 | 1189.5008 | 1188.5168      | 1121.5109 |           | Q    | 559.2835  | 558.2882  |           | 632.3362  | 615.3097  |
| 12 | 88.0393  | 1293.5594 | 1276.5328 | 1275.5488      | 1321.5543 | 1304.5277 | 1303.5437      | 1249.5695 |           | D    | 444.2565  | 443.2613  |           | 504.2776  | 487.2511  |
| 13 | 86.0964  | 1406.6434 | 1389.6169 | 1388.6329      | 1434.6383 | 1417.6118 | 1416.6278      | 1378.6121 | 1392.6278 | I    | 331.1724  | 344.1928  | 358.2085  | 389.2507  | 372.2241  |
| 14 | 74.0600  | 1507.6911 | 1490.6645 | 1489.6805      | 1535.6860 | 1518.6595 | 1517.6754      | 1491.6962 | 1493.6754 | T    | 230.1248  | 243.1452  | 245.1244  | 276.1666  | 259.1401  |
| 15 | 129.1135 |           |           |                |           |           |                |           |           | R    | 74.0237   | 73.0284   |           | 175.1190  | 158.0924  |

| Seq    | ya       | yb       | Seq    | ya       | yb       | Seq    | ya       | yb       |
|--------|----------|----------|--------|----------|----------|--------|----------|----------|
| LA     | 157.1335 | 185.1285 | LAY    | 320.1969 | 348.1918 | LAYD   | 435.2238 | 463.2187 |
| LAYDI  | 548.3079 | 576.3028 | LAYDIS | 635.3399 | 663.3348 | AY     | 207.1128 | 235.1077 |
| AYD    | 322.1397 | 350.1347 | AYDI   | 435.2238 | 463.2187 | AYDIS  | 522.2558 | 550.2508 |
| AYDISD | 637.2828 | 665.2777 | YD     | 251.1026 | 279.0975 | YDI    | 364.1867 | 392.1816 |
| YDIS   | 451.2187 | 479.2136 | YDISD  | 566.2457 | 594.2406 | YDISDD | 681.2726 | 709.2675 |
| DI     | 201.1234 | 229.1183 | DIS    | 288.1554 | 316.1503 | DISD   | 403.1823 | 431.1773 |

|        |          |          |        |          |          |        |          |          |
|--------|----------|----------|--------|----------|----------|--------|----------|----------|
| DISDD  | 518.2093 | 546.2042 | DISDDQ | 646.2679 | 674.2628 | IS     | 173.1285 | 201.1234 |
| ISD    | 288.1554 | 316.1503 | ISDD   | 403.1823 | 431.1773 | ISDDQ  | 531.2409 | 559.2358 |
| ISDDQQ | 659.2995 | 687.2944 | SD     | 175.0713 | 203.0662 | SDD    | 290.0983 | 318.0932 |
| SDDQ   | 418.1569 | 446.1518 | SDDQQ  | 546.2154 | 574.2103 | SDDQQD | 661.2424 | 689.2373 |
| DD     | 203.0662 | 231.0612 | DDQ    | 331.1248 | 359.1197 | DDQQ   | 459.1834 | 487.1783 |
| DDQQD  | 574.2103 | 602.2053 | DDQQDI | 687.2944 | 715.2893 | DQ     | 216.0979 | 244.0928 |
| DQQ    | 344.1565 | 372.1514 | DQQD   | 459.1834 | 487.1783 | DQQDI  | 572.2675 | 600.2624 |
| DQQDIT | 673.3151 | 701.3101 | QQ     | 229.1295 | 257.1244 | QQD    | 344.1565 | 372.1514 |
| QQDI   | 457.2405 | 485.2354 | QQDIT  | 558.2882 | 586.2831 | QD     | 216.0979 | 244.0928 |
| QDI    | 329.1819 | 357.1769 | QDIT   | 430.2296 | 458.2245 | DI     | 201.1234 | 229.1183 |
| DIT    | 302.1710 | 330.1660 | IT     | 187.1441 | 215.1390 |        |          |          |

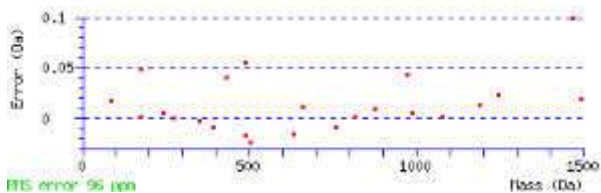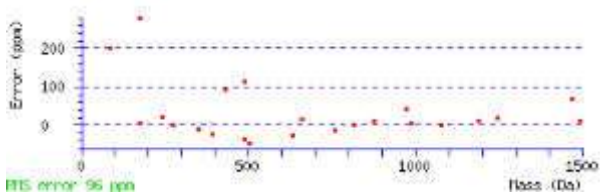

NCBI **BLAST** search of [GLAYDISDDQQDITR](#)

(Parameters: blastp, nr protein database, expect=20000, no filter, PAM30)

Other BLAST [web gateways](#)

#### All matches to this query

| Score | Mr(calc)  | Delta   | Sequence                          |
|-------|-----------|---------|-----------------------------------|
| 86.8  | 1708.7904 | -0.0096 | <a href="#">GLAYDISDDQQDITR</a>   |
| 66.9  | 1708.7540 | 0.0268  | <a href="#">GLAFDESDDQQDITR</a>   |
| 38.6  | 1708.7978 | -0.0170 | <a href="#">GLSTDLSMEAGYPGAPK</a> |
| 18.6  | 1708.8302 | -0.0493 | <a href="#">MSDGITVTESISQIGR</a>  |
| 18.2  | 1708.7760 | 0.0048  | <a href="#">LDVMSNGATMEAAVER</a>  |
| 18.2  | 1708.9009 | -0.1201 | <a href="#">ANIHALSGAWGDKLTR</a>  |
| 17.3  | 1708.8679 | -0.0871 | <a href="#">SHIQKAGLDMSHTIR</a>   |
| 14.7  | 1708.8784 | -0.0976 | <a href="#">FSNGANFAIVGSSTLPK</a> |
| 14.6  | 1708.8203 | -0.0394 | <a href="#">AYAMVRLEADGOVDR</a>   |
| 14.6  | 1708.8600 | -0.0792 | <a href="#">VASTSDLMSLMRLNR</a>   |

Mascot: <http://www.matrixscience.com/>

**MATRIX SCIENCE Mascot Search Results**

**Peptide View Spot no 67**

MS/MS Fragmentation of **MCCLFINDLAGAGR**

Found in **gi8918361** in **NCBInr**, RuBisCO activase small isoform precursor [Oryza sativa]

Match to Query 82: 1727.720424 from(1728.727700,1+) intensity(0.0000) index(28)

Title: Label: D4, Spot\_Id: 219725, Peak\_List\_Id: 225219, MSMS Job\_Run\_Id: 21770, Comment:

Data file C:\Documents and Settings\Administrator\Desktop\farah BHU\spot set plate\Farah-Garima 11May 2013\ppw\_D4\_136842162200.txt

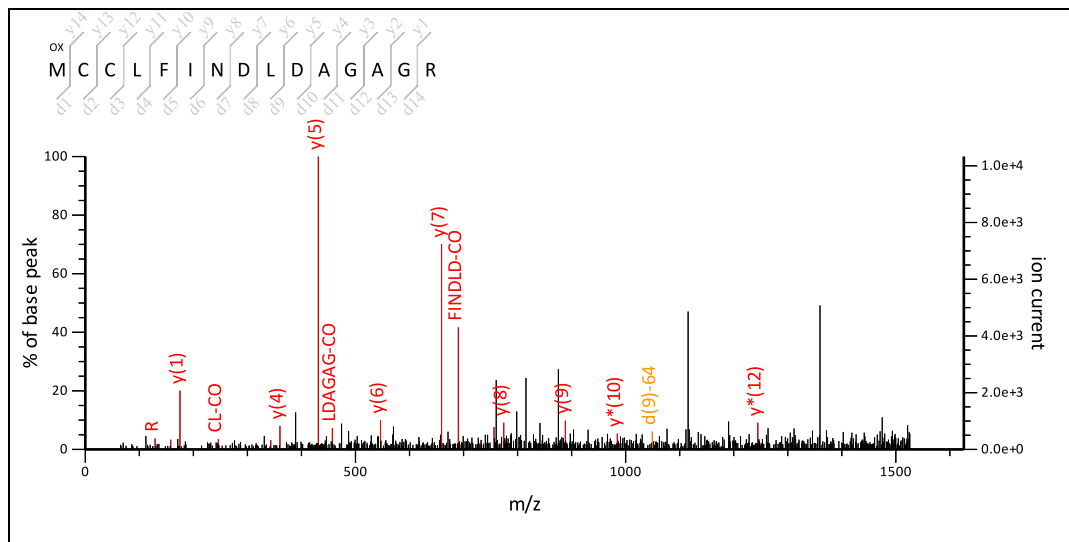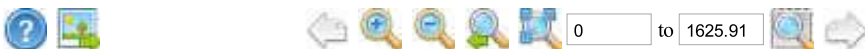

Label all possible matches  Label matches used for scoring

Monoisotopic mass of neutral peptide Mr(calc): 1727.7430

Fixed modifications: Carbamidomethyl (C) (apply to specified residues or termini only)

Variable modifications:

M1 : Oxidation (M), with neutral losses 63.9983(shown in table), 0.0000

Ions Score: 22 Expect: 6.5

Matches : 23/311 fragment ions using 45 most intense peaks [\(help\)](#)

| #  | Immon.   | a         | a*        | a <sup>0</sup> | b         | b*        | b <sup>0</sup> | d         | d'       | Seq. | v         | w         | w'       | y         | y*        |
|----|----------|-----------|-----------|----------------|-----------|-----------|----------------|-----------|----------|------|-----------|-----------|----------|-----------|-----------|
| 1  | 56.0495  | 56.0495   |           |                | 84.0444   |           |                | 44.0495   |          | M    |           |           |          |           |           |
| 2  | 133.0430 | 216.0801  |           |                | 244.0750  |           |                | 127.0866  |          | C    | 1476.6900 | 1475.6947 |          | 1581.7148 | 1564.6883 |
| 3  | 133.0430 | 376.1108  |           |                | 404.1057  |           |                | 287.1172  |          | C    | 1316.6593 | 1315.6641 |          | 1421.6842 | 1404.6576 |
| 4  | 86.0964  | 489.1948  |           |                | 517.1898  |           |                | 447.1479  |          | L    | 1203.5753 | 1202.5800 |          | 1261.6535 | 1244.6270 |
| 5  | 120.0808 | 636.2633  |           |                | 664.2582  |           |                |           |          | F    | 1056.5069 |           |          | 1148.5695 | 1131.5429 |
| 6  | 86.0964  | 749.3473  |           |                | 777.3422  |           |                | 721.3160  | 735.3317 | I    | 943.4228  | 956.4432  | 970.4588 | 1001.5010 | 984.4745  |
| 7  | 87.0553  | 863.3902  | 846.3637  |                | 891.3852  | 874.3586  |                | 820.3844  |          | N    | 829.3799  | 828.3846  |          | 888.4170  | 871.3904  |
| 8  | 88.0393  | 978.4172  | 961.3906  | 960.4066       | 1006.4121 | 989.3856  | 988.4015       | 934.4274  |          | D    | 714.3529  | 713.3577  |          | 774.3741  | 757.3475  |
| 9  | 86.0964  | 1091.5013 | 1074.4747 | 1073.4907      | 1119.4962 | 1102.4696 | 1101.4856      | 1049.4543 |          | L    | 601.2689  | 600.2736  |          | 659.3471  | 642.3206  |
| 10 | 88.0393  | 1206.5282 | 1189.5016 | 1188.5176      | 1234.5231 | 1217.4966 | 1216.5125      | 1162.5384 |          | D    | 486.2419  | 485.2467  |          | 546.2631  | 529.2365  |
| 11 | 44.0495  | 1277.5653 | 1260.5388 | 1259.5547      | 1305.5602 | 1288.5337 | 1287.5497      |           |          | A    | 415.2048  |           |          | 431.2361  | 414.2096  |
| 12 | 30.0338  | 1334.5868 | 1317.5602 | 1316.5762      | 1362.5817 | 1345.5551 | 1344.5711      |           |          | G    |           |           |          | 360.1990  | 343.1724  |
| 13 | 44.0495  | 1405.6239 | 1388.5973 | 1387.6133      | 1433.6188 | 1416.5923 | 1415.6082      |           |          | A    | 287.1462  |           |          | 303.1775  | 286.1510  |
| 14 | 30.0338  | 1462.6453 | 1445.6188 | 1444.6348      | 1490.6403 | 1473.6137 | 1472.6297      |           |          | G    |           |           |          | 232.1404  | 215.1139  |
| 15 | 129.1135 |           |           |                |           |           |                |           |          | R    | 74.0237   | 73.0284   |          | 175.1190  | 158.0924  |

| Seq   | ya       | yb       | Seq   | ya       | yb       | Seq  | ya       | yb       |
|-------|----------|----------|-------|----------|----------|------|----------|----------|
| CC    | 293.0737 | 321.0686 | CCL   | 406.1577 | 434.1526 | CCLF | 553.2261 | 581.2211 |
| CCLFI | 666.3102 | 694.3051 | CL    | 246.1271 | 274.1220 | CLF  | 393.1955 | 421.1904 |
| CLFI  | 506.2796 | 534.2745 | CLFIN | 620.3225 | 648.3174 | LF   | 233.1648 | 261.1598 |

|                 |          |          |               |          |          |                |          |          |
|-----------------|----------|----------|---------------|----------|----------|----------------|----------|----------|
| <b>LFI</b>      | 346.2489 | 374.2438 | <b>LFIN</b>   | 460.2918 | 488.2867 | <b>LFIND</b>   | 575.3188 | 603.3137 |
| <b>LFINDL</b>   | 688.4028 | 716.3978 | <b>FI</b>     | 233.1648 | 261.1598 | <b>FIN</b>     | 347.2078 | 375.2027 |
| <b>FIND</b>     | 462.2347 | 490.2296 | <b>FINDL</b>  | 575.3188 | 603.3137 | <b>FINDLD</b>  | 690.3457 | 718.3406 |
| <b>IN</b>       | 200.1394 | 228.1343 | <b>IND</b>    | 315.1663 | 343.1612 | <b>INDL</b>    | 428.2504 | 456.2453 |
| <b>INDLD</b>    | 543.2773 | 571.2722 | <b>INDLDA</b> | 614.3144 | 642.3093 | <b>INDLDAG</b> | 671.3359 | 699.3308 |
| <b>ND</b>       | 202.0822 | 230.0771 | <b>NDL</b>    | 315.1663 | 343.1612 | <b>NDLD</b>    | 430.1932 | 458.1882 |
| <b>NDLDA</b>    | 501.2304 | 529.2253 | <b>NDLDAG</b> | 558.2518 | 586.2467 | <b>NDLDAGA</b> | 629.2889 | 657.2838 |
| <b>NDLDAGAG</b> | 686.3104 | 714.3053 | <b>DL</b>     | 201.1234 | 229.1183 | <b>DLD</b>     | 316.1503 | 344.1452 |
| <b>DLDA</b>     | 387.1874 | 415.1823 | <b>DLDAG</b>  | 444.2089 | 472.2038 | <b>DLDAGA</b>  | 515.2460 | 543.2409 |
| <b>DLDAGAG</b>  | 572.2675 | 600.2624 | <b>LD</b>     | 201.1234 | 229.1183 | <b>LDA</b>     | 272.1605 | 300.1554 |
| <b>LDAG</b>     | 329.1819 | 357.1769 | <b>LDAGA</b>  | 400.2191 | 428.2140 | <b>LDAGAG</b>  | 457.2405 | 485.2354 |
| <b>DA</b>       | 159.0764 | 187.0713 | <b>DAG</b>    | 216.0979 | 244.0928 | <b>DAGA</b>    | 287.1350 | 315.1299 |
| <b>DAGAG</b>    | 344.1565 | 372.1514 | <b>AG</b>     | 101.0709 | 129.0659 | <b>AGA</b>     | 172.1081 | 200.1030 |
| <b>AGAG</b>     | 229.1295 | 257.1244 | <b>GA</b>     | 101.0709 | 129.0659 | <b>GAG</b>     | 158.0924 | 186.0873 |
| <b>AG</b>       | 101.0709 | 129.0659 |               |          |          |                |          |          |

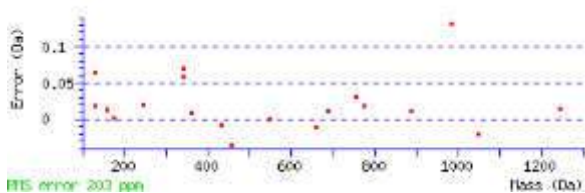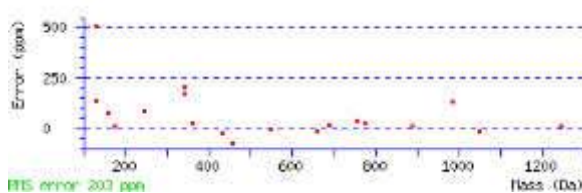

NCBI BLAST search of [MCCLFINDLDAGAGR](#)

(Parameters: blastp, nr protein database, expect=20000, no filter, PAM30)

Other BLAST [web gateways](#)

#### All matches to this query

| Score | Mr(calcd) | Delta   | Sequence                           |
|-------|-----------|---------|------------------------------------|
| 27.1  | 1727.8559 | -0.1355 | <a href="#">GHVMMMLNDRIOSVGR</a>   |
| 22.4  | 1727.7430 | -0.0225 | <a href="#">MCCLFINDLDAGAGR</a>    |
| 17.8  | 1727.8559 | -0.1355 | <a href="#">GHVMMMLNDRIOSVGR</a>   |
| 17.2  | 1727.8559 | -0.1355 | <a href="#">GHVMMMLNDRVQSLGR</a>   |
| 14.3  | 1727.8269 | -0.1065 | <a href="#">ASLCALMAPVGGHAAMR</a>  |
| 12.4  | 1727.7832 | -0.0627 | <a href="#">MAPAGGGDSPCASARAPR</a> |
| 12.3  | 1727.7607 | -0.0403 | <a href="#">EEELDMFCRNITR</a>      |
| 11.8  | 1727.7780 | -0.0576 | <a href="#">IMDDESVMPTTKMSK</a>    |
| 11.6  | 1727.8764 | -0.1559 | <a href="#">GSNIELMLDVPNEGLK</a>   |
| 11.2  | 1727.8070 | -0.0866 | <a href="#">SPGTTGSVKTGMTMTEK</a>  |

Mascot: <http://www.matrixscience.com/>

**MATRIX SCIENCE Mascot Search Results**

**Peptide View Spot no 67**

MS/MS Fragmentation of **EGPPEFEQPKMTIEK**

Found in **gi|8918361** in **NCBInr**, RuBisCO activase small isoform precursor [Oryza sativa]

Match to Query 84: 1774.819624 from(1775.826900,1+) intensity(0.0000) index(29)

Title: Label: D4, Spot\_Id: 219725, Peak\_List\_Id: 225223, MSMS Job\_Run\_Id: 21770, Comment:

Data file C:\Documents and Settings\Administrator\Desktop\farah BHU\spot set plate\Farah-Garima 11May 2013\ppw\_D4\_136842162200.txt

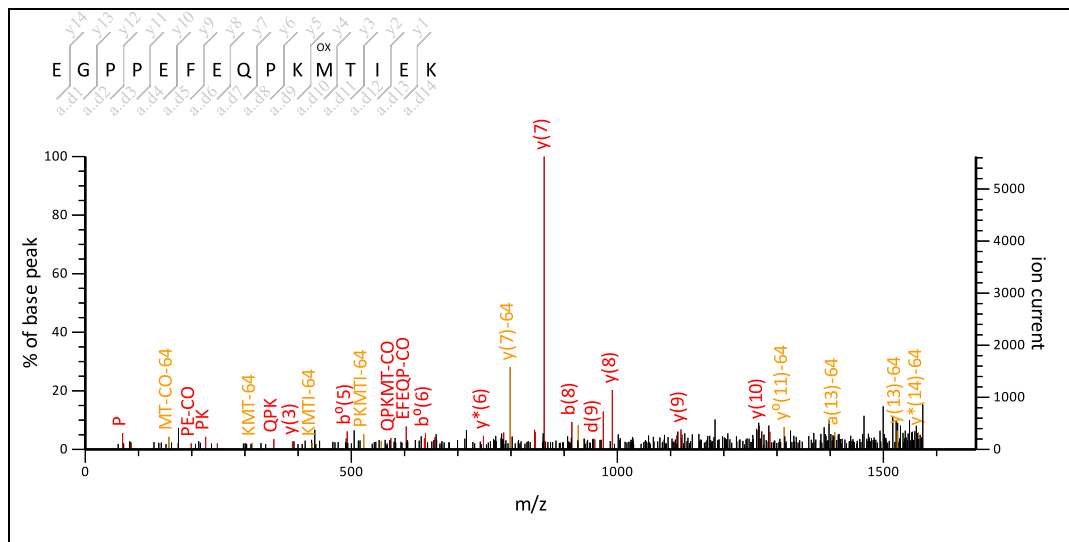

Navigation icons: Home, Back, Forward, Search, Zoom In, Zoom Out, Full Screen, Print. Search range: 0 to 1674.

Label all possible matches  Label matches used for scoring

Monoisotopic mass of neutral peptide Mr(calc): 1774.8447  
 Fixed modifications: Carbamidomethyl (C) (apply to specified residues or termini only)  
 Variable modifications:  
 M11 : Oxidation (M), with neutral losses 0.0000 (shown in table), 63.9983  
 Ions Score: 9 Expect: 2e+02  
 Matches : 50/358 fragment ions using 128 most intense peaks ([help](#))

| #  | Immon.   | a         | a*        | a <sup>0</sup> | b         | b*        | b <sup>0</sup> | d         | d'        | Seq. | v         | w         | w'       | y         | y*        |
|----|----------|-----------|-----------|----------------|-----------|-----------|----------------|-----------|-----------|------|-----------|-----------|----------|-----------|-----------|
| 1  | 102.0550 | 102.0550  |           | 84.0444        | 130.0499  |           | 112.0393       | 44.0495   |           | E    |           |           |          |           |           |
| 2  | 30.0338  | 159.0764  |           | 141.0659       | 187.0713  |           | 169.0608       |           |           | G    |           |           |          | 1646.8094 | 1629.7829 |
| 3  | 70.0651  | 256.1292  |           | 238.1186       | 284.1241  |           | 266.1135       | 230.1135  |           | P    | 1547.7410 | 1546.7458 |          | 1589.7880 | 1572.7614 |
| 4  | 70.0651  | 353.1819  |           | 335.1714       | 381.1769  |           | 363.1663       | 327.1663  |           | P    | 1450.6883 | 1449.6930 |          | 1492.7352 | 1475.7087 |
| 5  | 102.0550 | 482.2245  |           | 464.2140       | 510.2195  |           | 492.2089       | 424.2191  |           | E    | 1321.6457 | 1320.6504 |          | 1395.6824 | 1378.6559 |
| 6  | 120.0808 | 629.2930  |           | 611.2824       | 657.2879  |           | 639.2773       |           |           | F    | 1174.5773 |           |          | 1266.6399 | 1249.6133 |
| 7  | 102.0550 | 758.3355  |           | 740.3250       | 786.3305  |           | 768.3199       | 700.3301  |           | E    | 1045.5347 | 1044.5394 |          | 1119.5714 | 1102.5449 |
| 8  | 101.0709 | 886.3941  | 869.3676  | 868.3836       | 914.3890  | 897.3625  | 896.3785       | 829.3727  |           | Q    | 917.4761  | 916.4808  |          | 990.5288  | 973.5023  |
| 9  | 70.0651  | 983.4469  | 966.4203  | 965.4363       | 1011.4418 | 994.4153  | 993.4312       | 957.4312  |           | P    | 820.4233  | 819.4281  |          | 862.4703  | 845.4437  |
| 10 | 101.1073 | 1111.5419 | 1094.5153 | 1093.5313      | 1139.5368 | 1122.5102 | 1121.5262      | 1054.4840 |           | K    | 692.3284  | 691.3331  |          | 765.4175  | 748.3910  |
| 11 | 120.0478 | 1258.5773 | 1241.5507 | 1240.5667      | 1286.5722 | 1269.5456 | 1268.5616      | 1182.5790 |           | M    | 545.2930  | 544.2977  |          | 637.3225  | 620.2960  |
| 12 | 74.0600  | 1359.6249 | 1342.5984 | 1341.6144      | 1387.6198 | 1370.5933 | 1369.6093      | 1343.6300 | 1345.6093 | T    | 444.2453  | 457.2657  | 459.2449 | 490.2871  | 473.2606  |
| 13 | 86.0964  | 1472.7090 | 1455.6824 | 1454.6984      | 1500.7039 | 1483.6774 | 1482.6933      | 1444.6777 | 1458.6933 | I    | 331.1612  | 344.1816  | 358.1973 | 389.2395  | 372.2129  |
| 14 | 102.0550 | 1601.7516 | 1584.7250 | 1583.7410      | 1629.7465 | 1612.7200 | 1611.7359      | 1543.7461 |           | E    | 202.1186  | 201.1234  |          | 276.1554  | 259.1288  |
| 15 | 101.1073 |           |           |                |           |           |                |           |           | K    | 74.0237   | 73.0284   |          | 147.1128  | 130.0863  |

| Seq   | ya       | yb       | Seq    | ya       | yb       | Seq   | ya       | yb       |
|-------|----------|----------|--------|----------|----------|-------|----------|----------|
| GP    | 127.0866 | 155.0815 | GPP    | 224.1394 | 252.1343 | GPPE  | 353.1819 | 381.1769 |
| GPPEF | 500.2504 | 528.2453 | GPPEFE | 629.2930 | 657.2879 | PP    | 167.1179 | 195.1128 |
| PPE   | 296.1605 | 324.1554 | PPEF   | 443.2289 | 471.2238 | PPEFE | 572.2715 | 600.2664 |

|       |          |          |        |          |          |        |          |          |
|-------|----------|----------|--------|----------|----------|--------|----------|----------|
| PE    | 199.1077 | 227.1026 | PEF    | 346.1761 | 374.1710 | PEFE   | 475.2187 | 503.2136 |
| PEFEQ | 603.2773 | 631.2722 | EF     | 249.1234 | 277.1183 | EFE    | 378.1660 | 406.1609 |
| EFEQ  | 506.2245 | 534.2195 | EFEQP  | 603.2773 | 631.2722 | FE     | 249.1234 | 277.1183 |
| FEQ   | 377.1819 | 405.1769 | FEQP   | 474.2347 | 502.2296 | FEQPK  | 602.3297 | 630.3246 |
| EQ    | 230.1135 | 258.1084 | EQP    | 327.1663 | 355.1612 | EQPK   | 455.2613 | 483.2562 |
| EQPKM | 602.2967 | 630.2916 | QP     | 198.1237 | 226.1186 | QPK    | 326.2187 | 354.2136 |
| QPKM  | 473.2541 | 501.2490 | QPKMT  | 574.3017 | 602.2967 | QPKMTI | 687.3858 | 715.3807 |
| PK    | 198.1601 | 226.1550 | PKM    | 345.1955 | 373.1904 | PKMT   | 446.2432 | 474.2381 |
| PKMTI | 559.3272 | 587.3221 | PKMTIE | 688.3698 | 716.3647 | KM     | 248.1427 | 276.1376 |
| KMT   | 349.1904 | 377.1853 | KMTI   | 462.2745 | 490.2694 | KMTIE  | 591.3171 | 619.3120 |
| MT    | 221.0954 | 249.0904 | MTI    | 334.1795 | 362.1744 | MTIE   | 463.2221 | 491.2170 |
| TI    | 187.1441 | 215.1390 | TIE    | 316.1867 | 344.1816 | IE     | 215.1390 | 243.1339 |

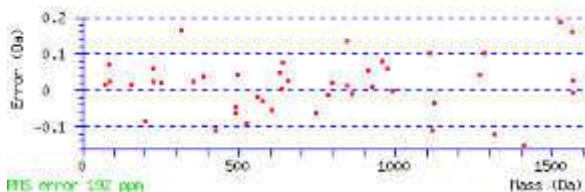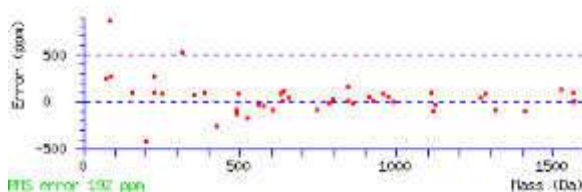

NCBI BLAST search of [EGPPEFEQPKMTIEK](#)

(Parameters: blastp, nr protein database, expect=20000, no filter, PAM30)

Other BLAST [web gateways](#)

#### All matches to this query

| Score | Mr(calc)  | Delta   | Sequence                           |
|-------|-----------|---------|------------------------------------|
| 12.5  | 1774.7138 | 0.1058  | <a href="#">DSNVMYLDKDCEDR</a>     |
| 10.8  | 1774.9829 | -0.1633 | <a href="#">SLELDKDLVALLGFR</a>    |
| 9.2   | 1774.9550 | -0.1354 | <a href="#">VOGPRAALPOAQAQGGGR</a> |
| 9.1   | 1774.8447 | -0.0251 | <a href="#">EGPPEFEQPKMTIEK</a>    |
| 8.2   | 1774.9326 | -0.1130 | <a href="#">TTNYIRIQATGTPSPR</a>   |
| 8.2   | 1774.9260 | -0.1064 | <a href="#">FTAEMVRPOLRANR</a>     |
| 7.0   | 1774.9108 | -0.0912 | <a href="#">VGOMNGSSTRLLTAQGR</a>  |
| 6.8   | 1774.9287 | -0.1091 | <a href="#">KPNELGFKELGMTPAK</a>   |
| 6.8   | 1774.9552 | -0.1356 | <a href="#">LWIRTEPDKPVTMR</a>     |
| 6.6   | 1774.9413 | -0.1217 | <a href="#">ALGTIHSHPVWMVRR</a>    |

Mascot: <http://www.matrixscience.com/>





# Mascot Search Results

## Peptide View **Spot no 69**

### MS/MS Fragmentation of **AAQVFSDPK**

Found in **gi|19387272** in **NCBI**nr, putative precursor chloroplastic glutamine synthetase [Oryza sativa Japonica Group]

Match to Query 15: 961.498704 from(962.505980,1+) intensity(0.0000) index(2)

Title: Label: B19, Spot\_Id: 219963, Peak\_List\_Id: 229185, MSMS Job\_Run\_Id: 22013, Comment:

Data file C:\Documents and Settings\Administrator\Desktop\Farah-Garima 11May 2013\ppw\_B19\_136868333300.txt

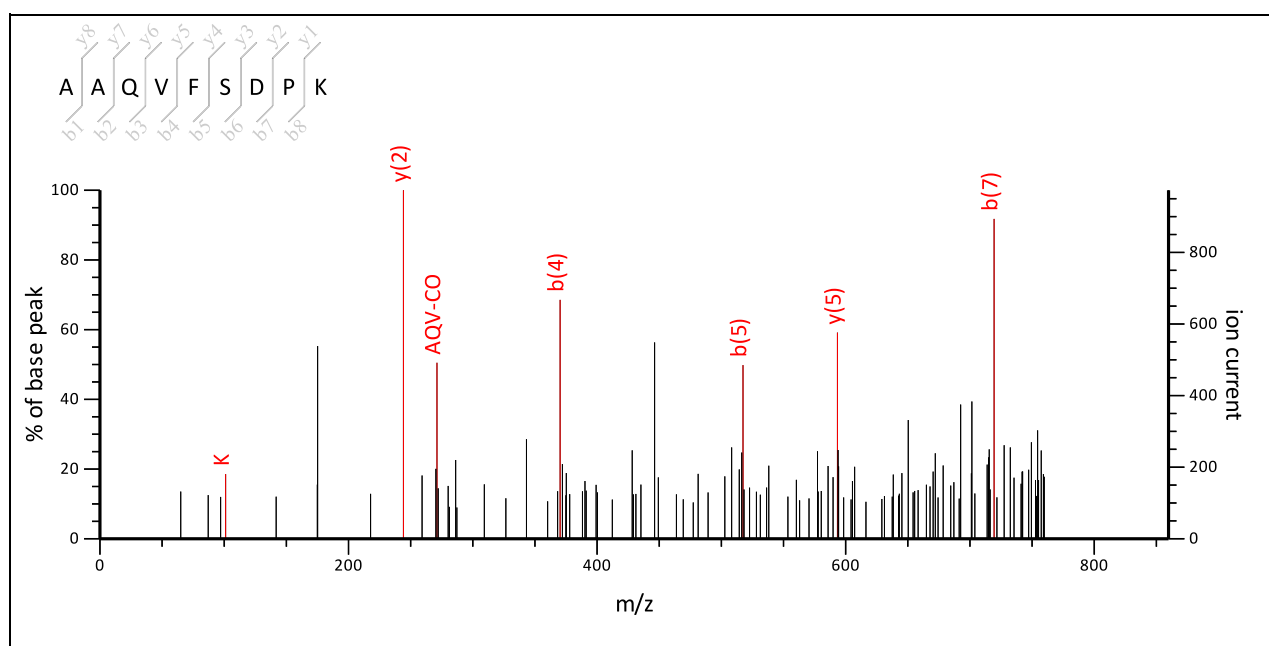

0 to 859.79

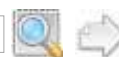

Label all possible matches  Label matches used for scoring

**Monoisotopic mass of neutral peptide Mr(calc):** 961.4869

**Fixed modifications:** Carbamidomethyl (C) (apply to specified residues or termini only)

**Ions Score:** 36 **Expect:** 9.9

**Matches:** 9/125 fragment ions using 7 most intense peaks ([help](#))

| # | Immon.   | a        | a*       | a <sup>0</sup> | b        | b*       | b <sup>0</sup> | d        | Seq. | v        | w        | y        | y*       | y <sup>0</sup> | # |
|---|----------|----------|----------|----------------|----------|----------|----------------|----------|------|----------|----------|----------|----------|----------------|---|
| 1 | 44.0495  | 44.0495  |          |                | 72.0444  |          |                | 44.0495  | A    |          |          |          |          |                | 9 |
| 2 | 44.0495  | 115.0866 |          |                | 143.0815 |          |                |          | A    | 875.4258 |          | 891.4571 | 874.4305 | 873.4465       | 8 |
| 3 | 101.0709 | 243.1452 | 226.1186 |                | 271.1401 | 254.1135 |                | 186.1237 | Q    | 747.3672 | 746.3719 | 820.4199 | 803.3934 | 802.4094       | 7 |
| 4 | 72.0808  | 342.2136 | 325.1870 |                | 370.2085 | 353.1819 |                | 328.1979 | V    | 648.2988 | 661.3192 | 692.3614 | 675.3348 | 674.3508       | 6 |
| 5 | 120.0808 | 489.2820 | 472.2554 |                | 517.2769 | 500.2504 |                |          | F    | 501.2304 |          | 593.2930 | 576.2664 | 575.2824       | 5 |
| 6 | 60.0444  | 576.3140 | 559.2875 | 558.3035       | 604.3089 | 587.2824 | 586.2984       | 560.3191 | S    | 414.1983 | 413.2031 | 446.2245 | 429.1980 | 428.2140       | 4 |
| 7 | 88.0393  | 691.3410 | 674.3144 | 673.3304       | 719.3359 | 702.3093 | 701.3253       | 647.3511 | D    | 299.1714 | 298.1761 | 359.1925 | 342.1660 | 341.1819       | 3 |
| 8 | 70.0651  | 788.3937 | 771.3672 | 770.3832       | 816.3886 | 799.3621 | 798.3781       | 762.3781 | P    | 202.1186 | 201.1234 | 244.1656 | 227.1390 |                | 2 |
| 9 | 101.1073 |          |          |                |          |          |                |          | K    | 74.0237  | 73.0284  | 147.1128 | 130.0863 |                | 1 |

| Seq   | ya       | yb       | Seq    | ya       | yb       | Seq   | ya       | yb       |
|-------|----------|----------|--------|----------|----------|-------|----------|----------|
| AQ    | 172.1081 | 200.1030 | AQV    | 271.1765 | 299.1714 | AQVF  | 418.2449 | 446.2398 |
| AQVFS | 505.2769 | 533.2718 | AQVFSD | 620.3039 | 648.2988 | QV    | 200.1394 | 228.1343 |
| QVF   | 347.2078 | 375.2027 | QVFS   | 434.2398 | 462.2347 | QVFSD | 549.2667 | 577.2617 |

|               |          |          |              |          |          |            |          |          |
|---------------|----------|----------|--------------|----------|----------|------------|----------|----------|
| <b>QVFSDP</b> | 646.3195 | 674.3144 | <b>VF</b>    | 219.1492 | 247.1441 | <b>VFS</b> | 306.1812 | 334.1761 |
| <b>VFSD</b>   | 421.2082 | 449.2031 | <b>VFSDP</b> | 518.2609 | 546.2558 | <b>FS</b>  | 207.1128 | 235.1077 |
| <b>FSD</b>    | 322.1397 | 350.1347 | <b>FSDP</b>  | 419.1925 | 447.1874 | <b>SD</b>  | 175.0713 | 203.0662 |
| <b>SDP</b>    | 272.1241 | 300.1190 | <b>DP</b>    | 185.0921 | 213.0870 |            |          |          |

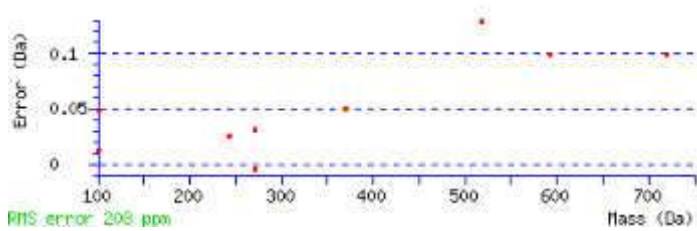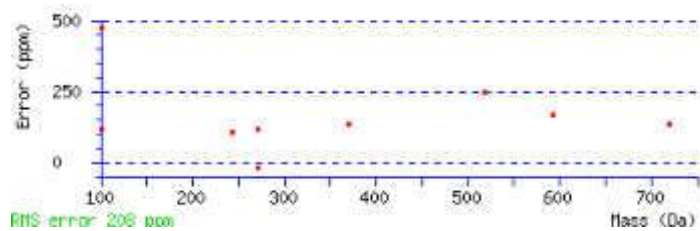

NCBI **BLAST** search of [AAQVFSDPK](#)

(Parameters: blastp, nr protein database, expect=20000, no filter, PAM30)

Other BLAST [web gateways](#)

#### All matches to this query

| Score | Mr(calc) | Delta   | Sequence                   |
|-------|----------|---------|----------------------------|
| 36.5  | 961.4869 | 0.0118  | <a href="#">AAQVFSDPK</a>  |
| 36.5  | 961.5233 | -0.0246 | <a href="#">AKAVFSDPK</a>  |
| 31.2  | 961.5709 | -0.0722 | <a href="#">KGLVFSVGR</a>  |
| 31.2  | 961.5709 | -0.0722 | <a href="#">KVAVFGVSR</a>  |
| 31.2  | 961.5345 | -0.0358 | <a href="#">QAVVFRDK</a>   |
| 31.2  | 961.5267 | -0.0280 | <a href="#">QAVVMLGTK</a>  |
| 31.2  | 961.5597 | -0.0610 | <a href="#">QGLVFAVTK</a>  |
| 31.2  | 961.4981 | 0.0006  | <a href="#">QVAVFQDR</a>   |
| 31.2  | 961.5345 | -0.0358 | <a href="#">QVAVFSGVR</a>  |
| 30.2  | 961.5345 | -0.0358 | <a href="#">AGAVVFGVSR</a> |

Mascot: <http://www.matrixscience.com/>

**MATRIX SCIENCE Mascot Search Results**

**Peptide View Spot no 69**

MS/MS Fragmentation of **HDLHISAYGEGNER**

Found in **gi|19387272** in **NCBI**nr, putative precursor chloroplastic glutamine synthetase [Oryza sativa Japonica Group]

Match to Query 112: 1596.776124 from(1597.783400,1+) intensity(0.0000) index(14)

Title: Label: B19, Spot\_Id: 219963, Peak\_List\_Id: 229164, MSMS Job\_Run\_Id: 22013, Comment:

Data file C:\Documents and Settings\Administrator\Desktop\Farah-Garima 11May 2013\ppw\_B19\_13686833300.txt

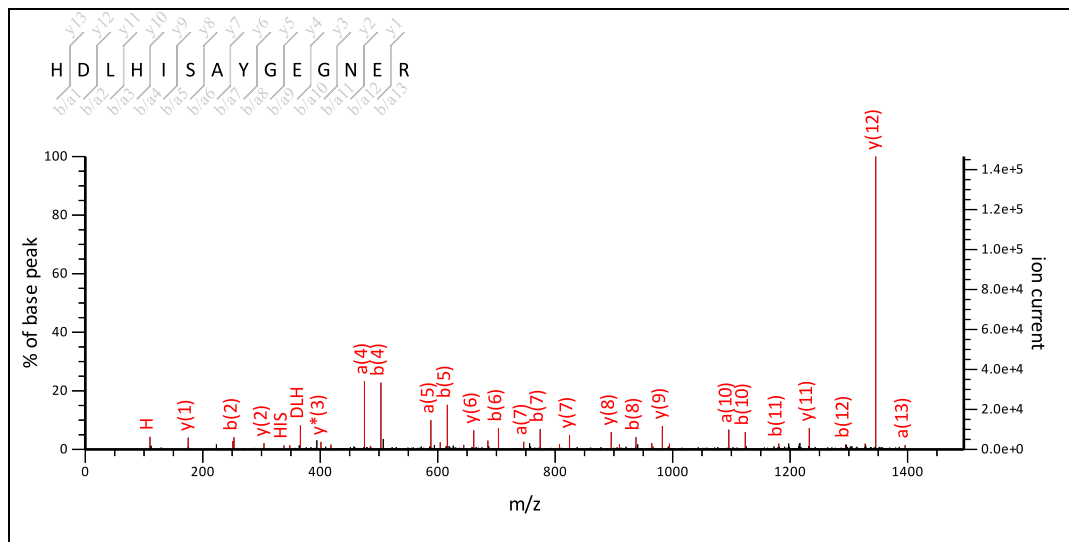

Navigation icons: Home, Back, Forward, Search, etc. Range: 0 to 1495.79

Label all possible matches  Label matches used for scoring

Monoisotopic mass of neutral peptide Mr(calc): 1596.7281

Fixed modifications: Carbamidomethyl (C) (apply to specified residues or termini only)

Ions Score: 103 Expect: 1.5e-06

Matches : 52/230 fragment ions using 56 most intense peaks ([help](#))

| #  | Immon.   | a         | a*        | a <sup>0</sup> | b         | b*        | b <sup>0</sup> | d         | d'       | Seq. | v         | w         | w'        | y         | y*        |
|----|----------|-----------|-----------|----------------|-----------|-----------|----------------|-----------|----------|------|-----------|-----------|-----------|-----------|-----------|
| 1  | 110.0713 | 110.0713  |           |                | 138.0662  |           |                | 44.0495   |          | H    |           |           |           |           |           |
| 2  | 88.0393  | 225.0982  |           | 207.0877       | 253.0931  |           | 235.0826       | 181.1084  |          | D    | 1400.6553 | 1399.6601 |           | 1460.6764 | 1443.6499 |
| 3  | 86.0964  | 338.1823  |           | 320.1717       | 366.1772  |           | 348.1666       | 296.1353  |          | L    | 1287.5713 | 1286.5760 |           | 1345.6495 | 1328.6230 |
| 4  | 110.0713 | 475.2412  |           | 457.2306       | 503.2361  |           | 485.2255       |           |          | H    | 1150.5123 |           |           | 1232.5654 | 1215.5389 |
| 5  | 86.0964  | 588.3253  |           | 570.3147       | 616.3202  |           | 598.3096       | 560.2940  | 574.3096 | I    | 1037.4283 | 1050.4487 | 1064.4643 | 1095.5065 | 1078.4800 |
| 6  | 60.0444  | 675.3573  |           | 657.3467       | 703.3522  |           | 685.3416       | 659.3624  |          | S    | 950.3963  | 949.4010  |           | 982.4225  | 965.3959  |
| 7  | 44.0495  | 746.3944  |           | 728.3838       | 774.3893  |           | 756.3787       |           |          | A    | 879.3591  |           |           | 895.3904  | 878.3639  |
| 8  | 136.0757 | 909.4577  |           | 891.4472       | 937.4526  |           | 919.4421       |           |          | Y    | 716.2958  |           |           | 824.3533  | 807.3268  |
| 9  | 30.0338  | 966.4792  |           | 948.4686       | 994.4741  |           | 976.4635       |           |          | G    |           |           |           | 661.2900  | 644.2634  |
| 10 | 102.0550 | 1095.5218 |           | 1077.5112      | 1123.5167 |           | 1105.5061      | 1037.5163 |          | E    | 530.2317  | 529.2365  |           | 604.2685  | 587.2420  |
| 11 | 30.0338  | 1152.5432 |           | 1134.5327      | 1180.5382 |           | 1162.5276      |           |          | G    |           |           |           | 475.2259  | 458.1994  |
| 12 | 87.0553  | 1266.5862 | 1249.5596 | 1248.5756      | 1294.5811 | 1277.5545 | 1276.5705      | 1223.5804 |          | N    | 359.1674  | 358.1721  |           | 418.2045  | 401.1779  |
| 13 | 102.0550 | 1395.6288 | 1378.6022 | 1377.6182      | 1423.6237 | 1406.5971 | 1405.6131      | 1337.6233 |          | E    | 230.1248  | 229.1295  |           | 304.1615  | 287.1350  |
| 14 | 129.1135 |           |           |                |           |           |                |           |          | R    | 74.0237   | 73.0284   |           | 175.1190  | 158.0924  |

| Seq    | ya       | yb       | Seq    | ya       | yb       | Seq     | ya       | yb       |
|--------|----------|----------|--------|----------|----------|---------|----------|----------|
| DL     | 201.1234 | 229.1183 | DLH    | 338.1823 | 366.1772 | DLHI    | 451.2663 | 479.2613 |
| DLHIS  | 538.2984 | 566.2933 | DLHISA | 609.3355 | 637.3304 | LH      | 223.1553 | 251.1503 |
| LHI    | 336.2394 | 364.2343 | LHIS   | 423.2714 | 451.2663 | LHISA   | 494.3085 | 522.3035 |
| LHISAY | 657.3719 | 685.3668 | HI     | 223.1553 | 251.1503 | HIS     | 310.1874 | 338.1823 |
| HISA   | 381.2245 | 409.2194 | HISAY  | 544.2878 | 572.2827 | HISAYG  | 601.3093 | 629.3042 |
| IS     | 173.1285 | 201.1234 | ISA    | 244.1656 | 272.1605 | ISAY    | 407.2289 | 435.2238 |
| ISAYG  | 464.2504 | 492.2453 | ISAYGE | 593.2930 | 621.2879 | ISAYGEG | 650.3144 | 678.3093 |

|       |          |          |        |          |          |         |          |          |
|-------|----------|----------|--------|----------|----------|---------|----------|----------|
| SA    | 131.0815 | 159.0764 | SAY    | 294.1448 | 322.1397 | SAYG    | 351.1663 | 379.1612 |
| SAYGE | 480.2089 | 508.2038 | SAYGEG | 537.2304 | 565.2253 | SAYGEGN | 651.2733 | 679.2682 |
| AY    | 207.1128 | 235.1077 | AYG    | 264.1343 | 292.1292 | AYGE    | 393.1769 | 421.1718 |
| AYGEG | 450.1983 | 478.1932 | AYGEGN | 564.2413 | 592.2362 | AYGEGNE | 693.2838 | 721.2788 |
| YG    | 193.0972 | 221.0921 | YGE    | 322.1397 | 350.1347 | YGEG    | 379.1612 | 407.1561 |
| YGEGN | 493.2041 | 521.1991 | YGEGNE | 622.2467 | 650.2416 | GE      | 159.0764 | 187.0713 |
| GEG   | 216.0979 | 244.0928 | GEGN   | 330.1408 | 358.1357 | GEGNE   | 459.1834 | 487.1783 |
| EG    | 159.0764 | 187.0713 | EGN    | 273.1193 | 301.1143 | EGNE    | 402.1619 | 430.1569 |
| GN    | 144.0768 | 172.0717 | GNE    | 273.1193 | 301.1143 | NE      | 216.0979 | 244.0928 |

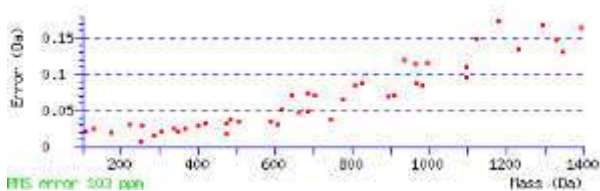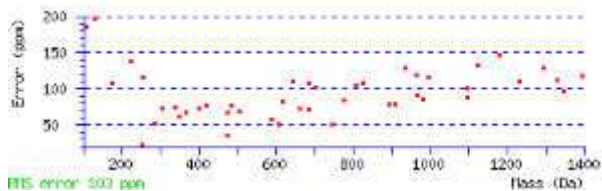

NCBI BLAST search of [HDLHISAYGEGNER](#)

(Parameters: blastp, nr protein database, expect=20000, no filter, PAM30)

Other BLAST [web gateways](#)

#### All matches to this query

| Score | Mr(calc)  | Delta   | Sequence                        |
|-------|-----------|---------|---------------------------------|
| 103.1 | 1596.7281 | 0.0481  | <a href="#">HDLHISAYGEGNER</a>  |
| 85.3  | 1596.7281 | 0.0481  | <a href="#">HVEHISAYGEGNER</a>  |
| 84.8  | 1596.7281 | 0.0481  | <a href="#">HEVHISAYGEGNER</a>  |
| 70.5  | 1596.6917 | 0.0845  | <a href="#">HDEHIAAYGEGNER</a>  |
| 51.4  | 1596.7644 | 0.0117  | <a href="#">HVEHISSYGLGNER</a>  |
| 33.5  | 1596.7653 | 0.0108  | <a href="#">HPHMLSVSNCFIR</a>   |
| 29.6  | 1596.7427 | 0.0335  | <a href="#">HDCAPARDSIASAAR</a> |
| 29.3  | 1596.6991 | 0.0771  | <a href="#">EKNMIDYNDHYR</a>    |
| 28.6  | 1596.7276 | 0.0485  | <a href="#">SMYVPSMVDLGNER</a>  |
| 27.4  | 1596.8293 | -0.0532 | <a href="#">EMELASLAHLSOLR</a>  |

Mascot: <http://www.matrixscience.com/>

**MATRIX SCIENCE Mascot Search Results**

**Peptide View Spot no 69**

MS/MS Fragmentation of **IIAEYIWVG GTGIDLR**

Found in **gi19387272** in **NCBIInr**, putative precursor chloroplastic glutamine synthetase [Oryza sativa Japonica Group]

Match to Query 143: 1775.011524 from(1776.018800,1+) intensity(0.0000) index(18)

Title: Label: B19, Spot\_Id: 219963, Peak\_List\_Id: 229172, MSMS Job\_Run\_Id: 22013, Comment:

Data file C:\Documents and Settings\Administrator\Desktop\Farah-Garima 11May 2013\ppw\_B19\_136868333300.txt

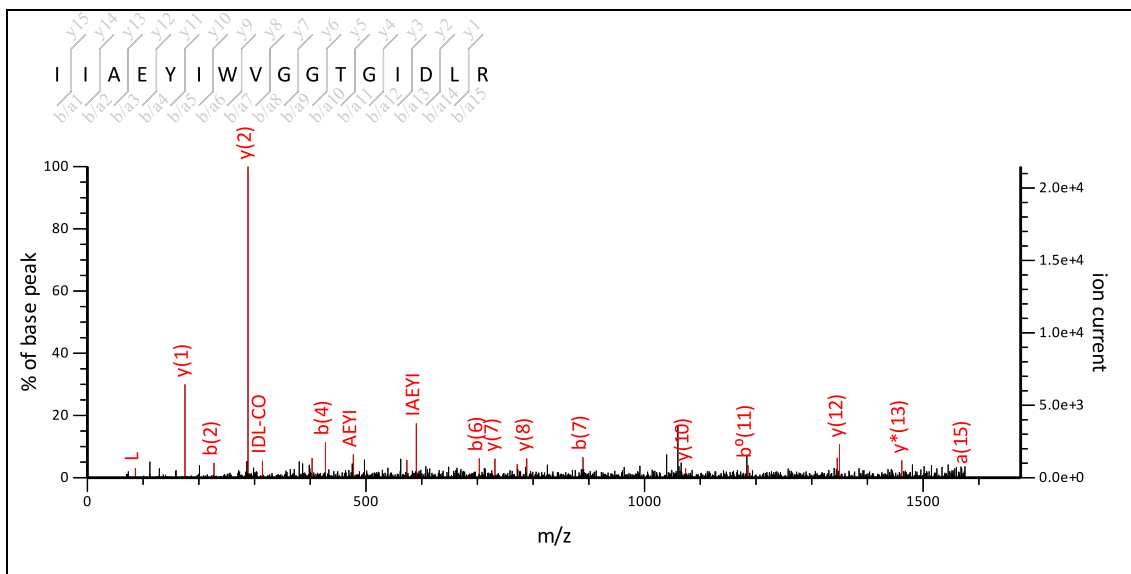

Navigation icons: ? [Image] [Image] [Image] [Image] [Image] 0 to 1675.04 [Image] [Image]

Label all possible matches  Label matches used for scoring

Monoisotopic mass of neutral peptide Mr(calc): 1774.9618  
 Fixed modifications: Carbamidomethyl (C) (apply to specified residues or termini only)  
 Ions Score: 57 Expect: 0.046  
 Matches : 32/264 fragment ions using 32 most intense peaks ([help](#))

| #  | Immon.   | a         | a <sup>0</sup> | b         | b <sup>0</sup> | d         | d'        | Seq. | v         | w         | w'        | y         | y*        | y <sup>0</sup> | #  |
|----|----------|-----------|----------------|-----------|----------------|-----------|-----------|------|-----------|-----------|-----------|-----------|-----------|----------------|----|
| 1  | 86.0964  | 86.0964   |                | 114.0913  |                | 44.0495   |           | I    |           |           |           |           |           |                | 16 |
| 2  | 86.0964  | 199.1805  |                | 227.1754  |                | 171.1492  | 185.1648  | I    | 1604.8067 | 1617.8271 | 1631.8428 | 1662.8850 | 1645.8584 | 1644.8744      | 15 |
| 3  | 44.0495  | 270.2176  |                | 298.2125  |                |           |           | A    | 1533.7696 |           |           | 1549.8009 | 1532.7744 | 1531.7904      | 14 |
| 4  | 102.0550 | 399.2602  | 381.2496       | 427.2551  | 409.2445       | 341.2547  |           | E    | 1404.7270 | 1403.7318 |           | 1478.7638 | 1461.7373 | 1460.7532      | 13 |
| 5  | 136.0757 | 562.3235  | 544.3130       | 590.3184  | 572.3079       |           |           | Y    | 1241.6637 |           |           | 1349.7212 | 1332.6947 | 1331.7106      | 12 |
| 6  | 86.0964  | 675.4076  | 657.3970       | 703.4025  | 685.3919       | 647.3763  | 661.3919  | I    | 1128.5796 | 1141.6000 | 1155.6157 | 1186.6579 | 1169.6313 | 1168.6473      | 11 |
| 7  | 159.0917 | 861.4869  | 843.4763       | 889.4818  | 871.4713       |           |           | W    | 942.5003  |           |           | 1073.5738 | 1056.5473 | 1055.5633      | 10 |
| 8  | 72.0808  | 960.5553  | 942.5448       | 988.5502  | 970.5397       | 946.5397  |           | V    | 843.4319  | 856.4523  |           | 887.4945  | 870.4680  | 869.4839       | 9  |
| 9  | 30.0338  | 1017.5768 | 999.5662       | 1045.5717 | 1027.5611      |           |           | G    |           |           |           | 788.4261  | 771.3995  | 770.4155       | 8  |
| 10 | 30.0338  | 1074.5982 | 1056.5877      | 1102.5932 | 1084.5826      |           |           | G    |           |           |           | 731.4046  | 714.3781  | 713.3941       | 7  |
| 11 | 74.0600  | 1175.6459 | 1157.6354      | 1203.6408 | 1185.6303      | 1159.6510 | 1161.6303 | T    | 628.3413  | 641.3617  | 643.3410  | 674.3832  | 657.3566  | 656.3726       | 6  |
| 12 | 30.0338  | 1232.6674 | 1214.6568      | 1260.6623 | 1242.6517      |           |           | G    |           |           |           | 573.3355  | 556.3089  | 555.3249       | 5  |
| 13 | 86.0964  | 1345.7515 | 1327.7409      | 1373.7464 | 1355.7358      | 1317.7202 | 1331.7358 | I    | 458.2358  | 471.2562  | 485.2718  | 516.3140  | 499.2875  | 498.3035       | 4  |
| 14 | 88.0393  | 1460.7784 | 1442.7678      | 1488.7733 | 1470.7627      | 1416.7886 |           | D    | 343.2088  | 342.2136  |           | 403.2300  | 386.2034  | 385.2194       | 3  |
| 15 | 86.0964  | 1573.8625 | 1555.8519      | 1601.8574 | 1583.8468      | 1531.8155 |           | L    | 230.1248  | 229.1295  |           | 288.2030  | 271.1765  |                | 2  |
| 16 | 129.1135 |           |                |           |                |           |           | R    | 74.0237   | 73.0284   |           | 175.1190  | 158.0924  |                | 1  |

| Seq | ya       | yb       | Seq | ya       | yb       | Seq  | ya       | yb       |
|-----|----------|----------|-----|----------|----------|------|----------|----------|
| IA  | 157.1335 | 185.1285 | IAE | 286.1761 | 314.1710 | IAEY | 449.2395 | 477.2344 |

|               |          |          |                |          |          |                 |          |          |
|---------------|----------|----------|----------------|----------|----------|-----------------|----------|----------|
| <b>IAEYI</b>  | 562.3235 | 590.3184 | <b>AE</b>      | 173.0921 | 201.0870 | <b>AEY</b>      | 336.1554 | 364.1503 |
| <b>AEYI</b>   | 449.2395 | 477.2344 | <b>AEYIW</b>   | 635.3188 | 663.3137 | <b>EY</b>       | 265.1183 | 293.1132 |
| <b>EYI</b>    | 378.2023 | 406.1973 | <b>EYIW</b>    | 564.2817 | 592.2766 | <b>EYIWV</b>    | 663.3501 | 691.3450 |
| <b>YI</b>     | 249.1598 | 277.1547 | <b>YIW</b>     | 435.2391 | 463.2340 | <b>YIWV</b>     | 534.3075 | 562.3024 |
| <b>YIWVG</b>  | 591.3289 | 619.3239 | <b>YIWVGG</b>  | 648.3504 | 676.3453 | <b>IW</b>       | 272.1757 | 300.1707 |
| <b>IWV</b>    | 371.2442 | 399.2391 | <b>IWVG</b>    | 428.2656 | 456.2605 | <b>IWVGG</b>    | 485.2871 | 513.2820 |
| <b>IWVGGT</b> | 586.3348 | 614.3297 | <b>IWVGGTG</b> | 643.3562 | 671.3511 | <b>WV</b>       | 258.1601 | 286.1550 |
| <b>WVG</b>    | 315.1816 | 343.1765 | <b>WVGG</b>    | 372.2030 | 400.1979 | <b>WVGGT</b>    | 473.2507 | 501.2456 |
| <b>WVGGTG</b> | 530.2722 | 558.2671 | <b>WVGGTGI</b> | 643.3562 | 671.3511 | <b>VG</b>       | 129.1022 | 157.0972 |
| <b>VGG</b>    | 186.1237 | 214.1186 | <b>VGGT</b>    | 287.1714 | 315.1663 | <b>VGGTG</b>    | 344.1928 | 372.1878 |
| <b>VGGTGI</b> | 457.2769 | 485.2718 | <b>VGGTGID</b> | 572.3039 | 600.2988 | <b>VGGTGIDL</b> | 685.3879 | 713.3828 |
| <b>GG</b>     | 87.0553  | 115.0502 | <b>GGT</b>     | 188.1030 | 216.0979 | <b>GGTG</b>     | 245.1244 | 273.1193 |
| <b>GGTGI</b>  | 358.2085 | 386.2034 | <b>GGTGID</b>  | 473.2354 | 501.2304 | <b>GGTGIDL</b>  | 586.3195 | 614.3144 |
| <b>GT</b>     | 131.0815 | 159.0764 | <b>GTG</b>     | 188.1030 | 216.0979 | <b>GTGI</b>     | 301.1870 | 329.1819 |
| <b>GTGID</b>  | 416.2140 | 444.2089 | <b>GTGIDL</b>  | 529.2980 | 557.2930 | <b>TG</b>       | 131.0815 | 159.0764 |
| <b>TGI</b>    | 244.1656 | 272.1605 | <b>TGID</b>    | 359.1925 | 387.1874 | <b>TGIDL</b>    | 472.2766 | 500.2715 |
| <b>GI</b>     | 143.1179 | 171.1128 | <b>GID</b>     | 258.1448 | 286.1397 | <b>GIDL</b>     | 371.2289 | 399.2238 |
| <b>ID</b>     | 201.1234 | 229.1183 | <b>IDL</b>     | 314.2074 | 342.2023 | <b>DL</b>       | 201.1234 | 229.1183 |

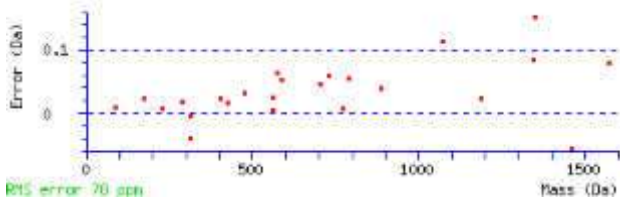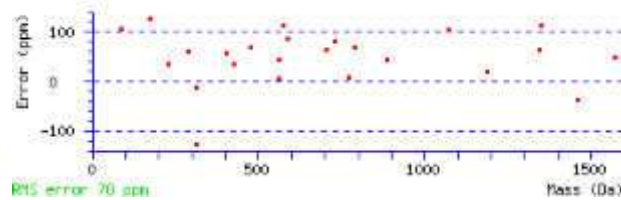

NCBI BLAST search of [IIAEYIWVGGTGIDLR](#)

(Parameters: blastp, nr protein database, expect=20000, no filter, PAM30)

Other BLAST [web gateways](#)

#### All matches to this query

| Score | Mr(calc)  | Delta  | Sequence                         |
|-------|-----------|--------|----------------------------------|
| 57.0  | 1774.9618 | 0.0498 | <a href="#">IIAEYIWVGGTGIDLR</a> |
| 45.7  | 1774.9617 | 0.0498 | <a href="#">IIAEYIWIGGSGIDIR</a> |
| 45.7  | 1774.9617 | 0.0498 | <a href="#">IIAEYIWIGGSGIDLR</a> |
| 45.7  | 1774.9617 | 0.0498 | <a href="#">IIAEYIWIGGSGLDLR</a> |
| 45.7  | 1774.9617 | 0.0498 | <a href="#">IIAEYLWIGGSGLDIR</a> |
| 37.5  | 1774.9618 | 0.0498 | <a href="#">IIAEYVWIGGTGIDLR</a> |
| 26.3  | 1774.9135 | 0.0980 | <a href="#">IIAEMEITGITVDAQR</a> |
| 26.1  | 1774.8638 | 0.1477 | <a href="#">NSLSWEAWVLPSSSGR</a> |
| 23.7  | 1774.9618 | 0.0498 | <a href="#">IIAEYIWIGGTGIDVR</a> |
| 23.3  | 1774.8962 | 0.1153 | <a href="#">LERVGENSPTLSDGOR</a> |

Mascot: <http://www.matrixscience.com/>



**MATRIX SCIENCE Mascot Search Results**

**Peptide View Spot no 69**

MS/MS Fragmentation of **LTGLHETASIDNFSWGVANR**

Found in **gi|19387272** in **NCBI**nr, putative precursor chloroplastic glutamine synthetase [Oryza sativa Japonica Group]

Match to Query 179: 2187.135524 from(2188.142800,1+) intensity(0.0000) index(22)

Title: Label: B19, Spot\_Id: 219963, Peak\_List\_Id: 229165, MSMS Job\_Run\_Id: 22013, Comment:

Data file C:\Documents and Settings\Administrator\Desktop\Farah-Garima 11May 2013\ppw\_B19\_13686833300.txt

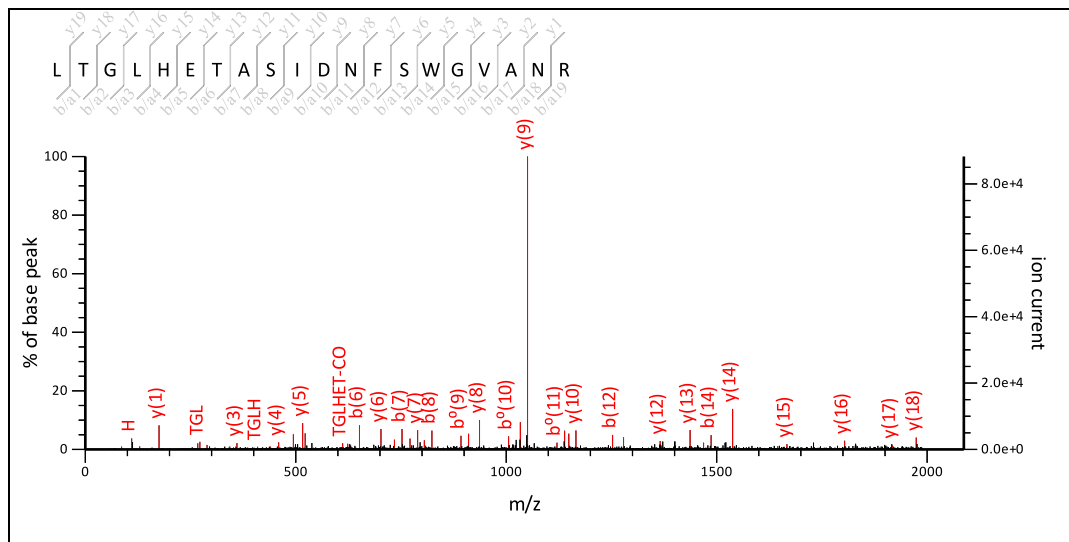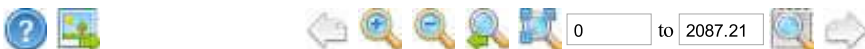

Label all possible matches  Label matches used for scoring

Monoisotopic mass of neutral peptide Mr(calc): 2187.0709

Fixed modifications: Carbamidomethyl (C) (apply to specified residues or termini only)

Ions Score: 143 Expect: 1.1e-10

Matches : 66/358 fragment ions using 80 most intense peaks [\(help\)](#)

| #  | Immon.   | a         | a*        | a <sup>0</sup> | b         | b*        | b <sup>0</sup> | d         | d'       | Seq. | v         | w         | w'        | y         | y*        |
|----|----------|-----------|-----------|----------------|-----------|-----------|----------------|-----------|----------|------|-----------|-----------|-----------|-----------|-----------|
| 1  | 86.0964  | 86.0964   |           |                | 114.0913  |           |                | 44.0495   |          | L    |           |           |           |           |           |
| 2  | 74.0600  | 187.1441  |           | 169.1335       | 215.1390  |           | 197.1285       | 171.1492  | 173.1285 | T    | 2028.9522 | 2041.9726 | 2043.9519 | 2074.9941 | 2057.9675 |
| 3  | 30.0338  | 244.1656  |           | 226.1550       | 272.1605  |           | 254.1499       |           |          | G    |           |           |           | 1973.9464 | 1956.9199 |
| 4  | 86.0964  | 357.2496  |           | 339.2391       | 385.2445  |           | 367.2340       | 315.2027  |          | L    | 1858.8467 | 1857.8515 |           | 1916.9250 | 1899.8984 |
| 5  | 110.0713 | 494.3085  |           | 476.2980       | 522.3035  |           | 504.2929       |           |          | H    | 1721.7878 |           |           | 1803.8409 | 1786.8143 |
| 6  | 102.0550 | 623.3511  |           | 605.3406       | 651.3461  |           | 633.3355       | 565.3457  |          | E    | 1592.7452 | 1591.7499 |           | 1666.7820 | 1649.7554 |
| 7  | 74.0600  | 724.3988  |           | 706.3883       | 752.3937  |           | 734.3832       | 708.4039  | 710.3832 | T    | 1491.6975 | 1504.7179 | 1506.6972 | 1537.7394 | 1520.7128 |
| 8  | 44.0495  | 795.4359  |           | 777.4254       | 823.4308  |           | 805.4203       |           |          | A    | 1420.6604 |           |           | 1436.6917 | 1419.6652 |
| 9  | 60.0444  | 882.4680  |           | 864.4574       | 910.4629  |           | 892.4523       | 866.4730  |          | S    | 1333.6284 | 1332.6331 |           | 1365.6546 | 1348.6280 |
| 10 | 86.0964  | 995.5520  |           | 977.5415       | 1023.5469 |           | 1005.5364      | 967.5207  | 981.5364 | I    | 1220.5443 | 1233.5647 | 1247.5804 | 1278.6226 | 1261.5960 |
| 11 | 88.0393  | 1110.5790 |           | 1092.5684      | 1138.5739 |           | 1120.5633      | 1066.5891 |          | D    | 1105.5174 | 1104.5221 |           | 1165.5385 | 1148.5119 |
| 12 | 87.0553  | 1224.6219 | 1207.5953 | 1206.6113      | 1252.6168 | 1235.5903 | 1234.6062      | 1181.6161 |          | N    | 991.4744  | 990.4792  |           | 1050.5116 | 1033.4850 |
| 13 | 120.0808 | 1371.6903 | 1354.6638 | 1353.6797      | 1399.6852 | 1382.6587 | 1381.6747      |           |          | F    | 844.4060  |           |           | 936.4686  | 919.4421  |
| 14 | 60.0444  | 1458.7223 | 1441.6958 | 1440.7118      | 1486.7172 | 1469.6907 | 1468.7067      | 1442.7274 |          | S    | 757.3740  | 756.3787  |           | 789.4002  | 772.3737  |
| 15 | 159.0917 | 1644.8016 | 1627.7751 | 1626.7911      | 1672.7966 | 1655.7700 | 1654.7860      |           |          | W    | 571.2947  |           |           | 702.3682  | 685.3416  |
| 16 | 30.0338  | 1701.8231 | 1684.7966 | 1683.8125      | 1729.8180 | 1712.7915 | 1711.8075      |           |          | G    |           |           |           | 516.2889  | 499.2623  |
| 17 | 72.0808  | 1800.8915 | 1783.8650 | 1782.8810      | 1828.8864 | 1811.8599 | 1810.8759      | 1786.8759 |          | V    | 415.2048  | 428.2252  |           | 459.2674  | 442.2409  |
| 18 | 44.0495  | 1871.9286 | 1854.9021 | 1853.9181      | 1899.9236 | 1882.8970 | 1881.9130      |           |          | A    | 344.1677  |           |           | 360.1990  | 343.1724  |
| 19 | 87.0553  | 1985.9716 | 1968.9450 | 1967.9610      | 2013.9665 | 1996.9399 | 1995.9559      | 1942.9658 |          | N    | 230.1248  | 229.1295  |           | 289.1619  | 272.1353  |
| 20 | 129.1135 |           |           |                |           |           |                |           |          | R    | 74.0237   | 73.0284   |           | 175.1190  | 158.0924  |

| Seq | ya       | yb       | Seq | ya       | yb       | Seq  | ya       | yb       |
|-----|----------|----------|-----|----------|----------|------|----------|----------|
| TG  | 131.0815 | 159.0764 | TGL | 244.1656 | 272.1605 | TGLH | 381.2245 | 409.2194 |



|        |          |          |        |          |          |         |          |          |
|--------|----------|----------|--------|----------|----------|---------|----------|----------|
| TGLHE  | 510.2671 | 538.2620 | TGLHET | 611.3148 | 639.3097 | TGLHETA | 682.3519 | 710.3468 |
| GL     | 143.1179 | 171.1128 | GLH    | 280.1768 | 308.1717 | GLHE    | 409.2194 | 437.2143 |
| GLHET  | 510.2671 | 538.2620 | GLHETA | 581.3042 | 609.2991 | GLHETAS | 668.3362 | 696.3311 |
| LH     | 223.1553 | 251.1503 | LHE    | 352.1979 | 380.1928 | LHET    | 453.2456 | 481.2405 |
| LHETA  | 524.2827 | 552.2776 | LHETAS | 611.3148 | 639.3097 | HE      | 239.1139 | 267.1088 |
| HET    | 340.1615 | 368.1565 | HETA   | 411.1987 | 439.1936 | HETAS   | 498.2307 | 526.2256 |
| HETASI | 611.3148 | 639.3097 | ET     | 203.1026 | 231.0975 | ETA     | 274.1397 | 302.1347 |
| ETAS   | 361.1718 | 389.1667 | ETASI  | 474.2558 | 502.2508 | ETASID  | 589.2828 | 617.2777 |
| TA     | 145.0972 | 173.0921 | TAS    | 232.1292 | 260.1241 | TASI    | 345.2132 | 373.2082 |
| TASID  | 460.2402 | 488.2351 | TASIDN | 574.2831 | 602.2780 | AS      | 131.0815 | 159.0764 |
| ASI    | 244.1656 | 272.1605 | ASID   | 359.1925 | 387.1874 | ASIDN   | 473.2354 | 501.2304 |
| ASIDNF | 620.3039 | 648.2988 | SI     | 173.1285 | 201.1234 | SID     | 288.1554 | 316.1503 |
| SIDN   | 402.1983 | 430.1932 | SIDNF  | 549.2667 | 577.2617 | SIDNFS  | 636.2988 | 664.2937 |
| ID     | 201.1234 | 229.1183 | IDN    | 315.1663 | 343.1612 | IDNF    | 462.2347 | 490.2296 |
| IDNFS  | 549.2667 | 577.2617 | DN     | 202.0822 | 230.0771 | DNF     | 349.1506 | 377.1456 |
| DNFS   | 436.1827 | 464.1776 | DNFSW  | 622.2620 | 650.2569 | DNFSWG  | 679.2835 | 707.2784 |
| NF     | 234.1237 | 262.1186 | NFS    | 321.1557 | 349.1506 | NFSW    | 507.2350 | 535.2300 |
| NFSWG  | 564.2565 | 592.2514 | NFSWGV | 663.3249 | 691.3198 | FS      | 207.1128 | 235.1077 |
| FSW    | 393.1921 | 421.1870 | FSWG   | 450.2136 | 478.2085 | FSWGV   | 549.2820 | 577.2769 |
| FSWGVA | 620.3191 | 648.3140 | SW     | 246.1237 | 274.1186 | SWG     | 303.1452 | 331.1401 |
| SWG    | 402.2136 | 430.2085 | SWGVA  | 473.2507 | 501.2456 | SWGVA   | 587.2936 | 615.2885 |
| WG     | 216.1131 | 244.1081 | WGV    | 315.1816 | 343.1765 | WGVA    | 386.2187 | 414.2136 |
| WGVAN  | 500.2616 | 528.2565 | GV     | 129.1022 | 157.0972 | GVA     | 200.1394 | 228.1343 |
| GVAN   | 314.1823 | 342.1772 | VA     | 143.1179 | 171.1128 | VAN     | 257.1608 | 285.1557 |
| AN     | 158.0924 | 186.0873 |        |          |          |         |          |          |

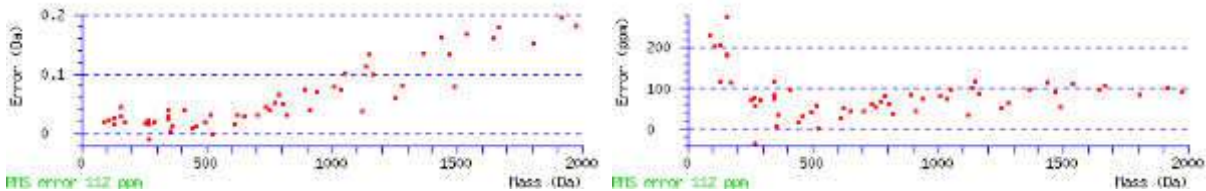

NCBI BLAST search of [LTGLHETASIDNFSWGVANR](#)

(Parameters: blastp, nr protein database, expect=20000, no filter, PAM30)

Other BLAST [web gateways](#)

#### All matches to this query

| Score | Mr(calc)  | Delta   | Sequence                              |
|-------|-----------|---------|---------------------------------------|
| 143.3 | 2187.0709 | 0.0646  | <a href="#">LTGLHETASIDNFSWGVANR</a>  |
| 28.0  | 2187.1775 | -0.0420 | <a href="#">LTHWIKVFLFNVAQMNR</a>     |
| 20.8  | 2187.1648 | -0.0292 | <a href="#">ITGSKIHSIEVSFNVSISR</a>   |
| 20.1  | 2187.1939 | -0.0584 | <a href="#">TIGIIPDISNOFYPEIVR</a>    |
| 20.1  | 2187.1939 | -0.0584 | <a href="#">TIGILLPDISNOFYPEIVR</a>   |
| 19.9  | 2187.1067 | 0.0288  | <a href="#">LDPIAKNAMPLMELYESPR</a>   |
| 19.8  | 2187.1436 | -0.0081 | <a href="#">LVGNRPDAAAVEITFGPASFR</a> |
| 19.7  | 2187.1647 | -0.0292 | <a href="#">KAQLIIDQIDLGGANNVYSR</a>  |
| 19.3  | 2187.2627 | -0.1271 | <a href="#">LPAVLEAESLPPRLVSVIER</a>  |
| 18.7  | 2187.2627 | -0.1271 | <a href="#">LPAVLEAESLPPRLVSVLER</a>  |

Mascot: <http://www.matrixscience.com/>

**MATRIX SCIENCE Mascot Search Results**

**Peptide View Spot no 69**

MS/MS Fragmentation of **VVSQVPWFGIEQYTLQLR**

Found in **gi|19387272** in **NCBI**nr, putative precursor chloroplastic glutamine synthetase [Oryza sativa Japonica Group]

Match to Query 199: 2291.265224 from(2292.272500,1+) intensity(0.0000) index(24)

Title: Label: B19, Spot\_Id: 219963, Peak\_List\_Id: 229163, MSMS Job\_Run\_Id: 22013, Comment:

Data file C:\Documents and Settings\Administrator\Desktop\Farah-Garima 11May 2013\ppw\_B19\_136868333300.txt

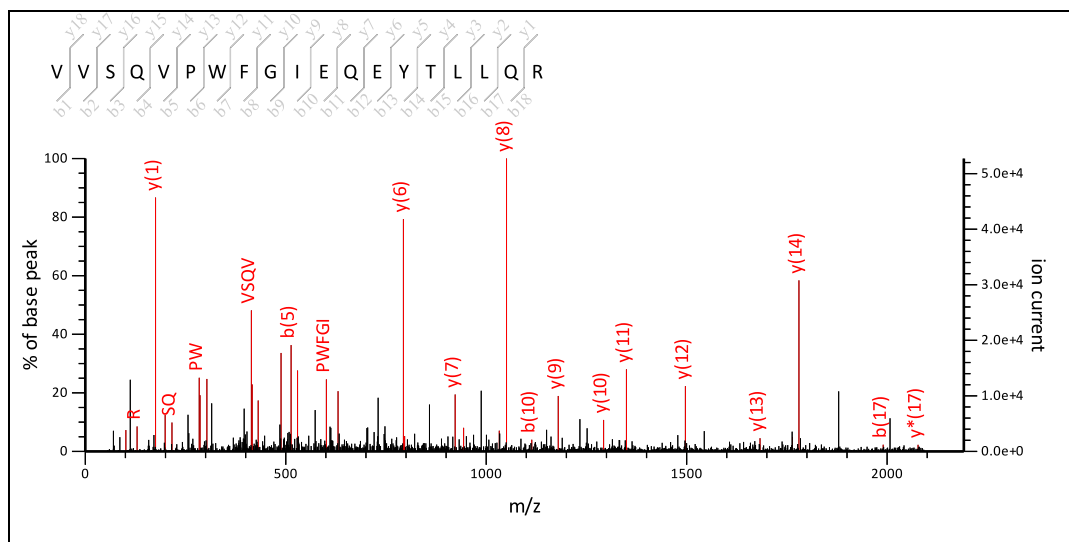

Navigation icons: Home, Back, Forward, Search, Print, etc. Search range: 0 to 2191.39

Label all possible matches  Label matches used for scoring

Monoisotopic mass of neutral peptide Mr(calc): 2291.1950

Fixed modifications: Carbamidomethyl (C) (apply to specified residues or termini only)

Ions Score: 84 Expect: 8.7e-05

Matches : 40/338 fragment ions using 63 most intense peaks [\(help\)](#)

| #  | Immon.   | a         | a*        | a <sup>0</sup> | b         | b*        | b <sup>0</sup> | d         | d'        | Seq. | v         | w         | w'        | y         | y*        |
|----|----------|-----------|-----------|----------------|-----------|-----------|----------------|-----------|-----------|------|-----------|-----------|-----------|-----------|-----------|
| 1  | 72.0808  | 72.0808   |           |                | 100.0757  |           |                | 44.0495   |           | V    |           |           |           |           |           |
| 2  | 72.0808  | 171.1492  |           |                | 199.1441  |           |                | 157.1335  |           | V    | 2149.0713 | 2162.0917 |           | 2193.1339 | 2176.1073 |
| 3  | 60.0444  | 258.1812  |           | 240.1707       | 286.1761  |           | 268.1656       | 242.1863  |           | S    | 2062.0393 | 2061.0440 |           | 2094.0655 | 2077.0389 |
| 4  | 101.0709 | 386.2398  | 369.2132  | 368.2292       | 414.2347  | 397.2082  | 396.2241       | 329.2183  |           | Q    | 1933.9807 | 1932.9854 |           | 2007.0334 | 1990.0069 |
| 5  | 72.0808  | 485.3082  | 468.2817  | 467.2976       | 513.3031  | 496.2766  | 495.2926       | 471.2926  |           | V    | 1834.9123 | 1847.9327 |           | 1878.9749 | 1861.9483 |
| 6  | 70.0651  | 582.3610  | 565.3344  | 564.3504       | 610.3559  | 593.3293  | 592.3453       | 556.3453  |           | P    | 1737.8595 | 1736.8643 |           | 1779.9064 | 1762.8799 |
| 7  | 159.0917 | 768.4403  | 751.4137  | 750.4297       | 796.4352  | 779.4087  | 778.4246       |           |           | W    | 1551.7802 |           |           | 1682.8537 | 1665.8271 |
| 8  | 120.0808 | 915.5087  | 898.4822  | 897.4981       | 943.5036  | 926.4771  | 925.4930       |           |           | F    | 1404.7118 |           |           | 1496.7744 | 1479.7478 |
| 9  | 30.0338  | 972.5302  | 955.5036  | 954.5196       | 1000.5251 | 983.4985  | 982.5145       |           |           | G    |           |           |           | 1349.7060 | 1332.6794 |
| 10 | 86.0964  | 1085.6142 | 1068.5877 | 1067.6037      | 1113.6091 | 1096.5826 | 1095.5986      | 1057.5829 | 1071.5986 | I    | 1234.6062 | 1247.6266 | 1261.6423 | 1292.6845 | 1275.6579 |
| 11 | 102.0550 | 1214.6568 | 1197.6303 | 1196.6463      | 1242.6517 | 1225.6252 | 1224.6412      | 1156.6513 |           | E    | 1105.5637 | 1104.5684 |           | 1179.6004 | 1162.5739 |
| 12 | 101.0709 | 1342.7154 | 1325.6889 | 1324.7048      | 1370.7103 | 1353.6838 | 1352.6997      | 1285.6939 |           | Q    | 977.5051  | 976.5098  |           | 1050.5578 | 1033.5313 |
| 13 | 102.0550 | 1471.7580 | 1454.7314 | 1453.7474      | 1499.7529 | 1482.7264 | 1481.7423      | 1413.7525 |           | E    | 848.4625  | 847.4672  |           | 922.4993  | 905.4727  |
| 14 | 136.0757 | 1634.8213 | 1617.7948 | 1616.8108      | 1662.8162 | 1645.7897 | 1644.8057      |           |           | Y    | 685.3992  |           |           | 793.4567  | 776.4301  |
| 15 | 74.0600  | 1735.8690 | 1718.8425 | 1717.8584      | 1763.8639 | 1746.8374 | 1745.8534      | 1719.8741 | 1721.8534 | T    | 584.3515  | 597.3719  | 599.3511  | 630.3933  | 613.3668  |
| 16 | 86.0964  | 1848.9531 | 1831.9265 | 1830.9425      | 1876.9480 | 1859.9214 | 1858.9374      | 1806.9061 |           | L    | 471.2674  | 470.2722  |           | 529.3457  | 512.3191  |
| 17 | 86.0964  | 1962.0371 | 1945.0106 | 1944.0266      | 1990.0320 | 1973.0055 | 1972.0215      | 1919.9902 |           | L    | 358.1833  | 357.1881  |           | 416.2616  | 399.2350  |
| 18 | 101.0709 | 2090.0957 | 2073.0692 | 2072.0851      | 2118.0906 | 2101.0641 | 2100.0801      | 2033.0742 |           | Q    | 230.1248  | 229.1295  |           | 303.1775  | 286.1510  |
| 19 | 129.1135 |           |           |                |           |           |                |           |           | R    | 74.0237   | 73.0284   |           | 175.1190  | 158.0924  |

| Seq   | ya       | yb       | Seq    | ya       | yb       | Seq  | ya       | yb       |
|-------|----------|----------|--------|----------|----------|------|----------|----------|
| VS    | 159.1128 | 187.1077 | VSQ    | 287.1714 | 315.1663 | VSQV | 386.2398 | 414.2347 |
| VSQVP | 483.2926 | 511.2875 | VSQVPW | 669.3719 | 697.3668 | SQ   | 188.1030 | 216.0979 |

|                        |                 |                 |                        |                 |                 |                       |                 |                 |
|------------------------|-----------------|-----------------|------------------------|-----------------|-----------------|-----------------------|-----------------|-----------------|
| <a href="#">SQV</a>    | 287.1714        | 315.1663        | <a href="#">SQVP</a>   | 384.2241        | 412.2191        | <a href="#">SQVPW</a> | 570.3035        | 598.2984        |
| <a href="#">QV</a>     | 200.1394        | 228.1343        | <a href="#">QVP</a>    | 297.1921        | 325.1870        | <a href="#">QVPW</a>  | 483.2714        | 511.2663        |
| <a href="#">QVPWF</a>  | <b>630.3398</b> | 658.3348        | <a href="#">QVPWFG</a> | 687.3613        | 715.3562        | <a href="#">VP</a>    | 169.1335        | 197.1285        |
| <a href="#">VPW</a>    | 355.2129        | 383.2078        | <a href="#">VPWF</a>   | 502.2813        | 530.2762        | <a href="#">VPWFG</a> | 559.3027        | 587.2976        |
| <a href="#">VPWFGI</a> | 672.3868        | 700.3817        | <a href="#">PW</a>     | 256.1444        | <b>284.1394</b> | <a href="#">PWF</a>   | 403.2129        | <b>431.2078</b> |
| <a href="#">PWFG</a>   | 460.2343        | <b>488.2292</b> | <a href="#">PWFGI</a>  | <b>573.3184</b> | <b>601.3133</b> | <a href="#">WF</a>    | 306.1601        | 334.1550        |
| <a href="#">WFG</a>    | 363.1816        | 391.1765        | <a href="#">WFGI</a>   | 476.2656        | 504.2605        | <a href="#">WFGIE</a> | 605.3082        | 633.3031        |
| <a href="#">FG</a>     | 177.1022        | 205.0972        | <a href="#">FGI</a>    | 290.1863        | 318.1812        | <a href="#">FGIE</a>  | 419.2289        | 447.2238        |
| <a href="#">FGIEQ</a>  | 547.2875        | 575.2824        | <a href="#">FGIEQE</a> | 676.3301        | 704.3250        | <a href="#">GI</a>    | 143.1179        | 171.1128        |
| <a href="#">GIE</a>    | 272.1605        | 300.1554        | <a href="#">GIEQ</a>   | 400.2191        | 428.2140        | <a href="#">GIEQE</a> | <b>529.2617</b> | 557.2566        |
| <a href="#">GIEQEY</a> | 692.3250        | 720.3199        | <a href="#">IE</a>     | 215.1390        | 243.1339        | <a href="#">IEQ</a>   | 343.1976        | 371.1925        |
| <a href="#">IEQE</a>   | 472.2402        | 500.2351        | <a href="#">IEQEY</a>  | 635.3035        | 663.2984        | <a href="#">EQ</a>    | 230.1135        | 258.1084        |
| <a href="#">EQE</a>    | 359.1561        | 387.1510        | <a href="#">EQEY</a>   | 522.2195        | 550.2144        | <a href="#">EQEYT</a> | 623.2671        | 651.2620        |
| <a href="#">QE</a>     | 230.1135        | 258.1084        | <a href="#">QEY</a>    | 393.1769        | 421.1718        | <a href="#">QEYT</a>  | 494.2245        | 522.2195        |
| <a href="#">QEYTL</a>  | 607.3086        | 635.3035        | <a href="#">EY</a>     | 265.1183        | 293.1132        | <a href="#">EYT</a>   | 366.1660        | 394.1609        |
| <a href="#">EYTL</a>   | 479.2500        | 507.2449        | <a href="#">EYTL</a>   | 592.3341        | 620.3290        | <a href="#">YT</a>    | 237.1234        | 265.1183        |
| <a href="#">YTL</a>    | 350.2074        | 378.2023        | <a href="#">YTLL</a>   | 463.2915        | 491.2864        | <a href="#">YTLLQ</a> | 591.3501        | 619.3450        |
| <a href="#">TL</a>     | 187.1441        | 215.1390        | <a href="#">TLL</a>    | 300.2282        | 328.2231        | <a href="#">TLLQ</a>  | 428.2867        | 456.2817        |
| <a href="#">LL</a>     | <b>199.1805</b> | 227.1754        | <a href="#">LLQ</a>    | 327.2391        | 355.2340        | <a href="#">LQ</a>    | 214.1550        | 242.1499        |

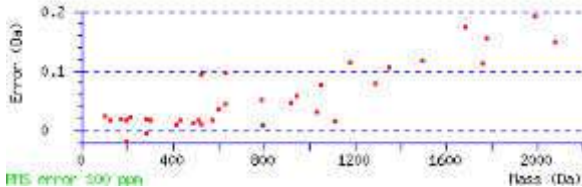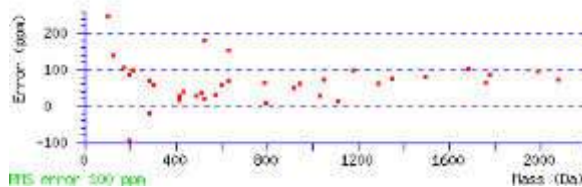

NCBI BLAST search of [VVSQVPWFGIEQEYTLQR](#)

(Parameters: blastp, nr protein database, expect=20000, no filter, PAM30)

Other BLAST [web gateways](#)

#### All matches to this query

| Score | Mr(calcd) | Delta   | Sequence                                 |
|-------|-----------|---------|------------------------------------------|
| 83.8  | 2291.1950 | 0.0702  | <a href="#">VVSQVPWFGIEQEYTLQR</a>       |
| 26.9  | 2291.2750 | -0.0098 | <a href="#">TPLVLNGTFGAPKGGLOAGPLAGR</a> |
| 25.3  | 2291.1402 | 0.1250  | <a href="#">GWVVAVLSMVMAASAVAQENSR</a>   |
| 21.5  | 2291.2386 | 0.0266  | <a href="#">ERLPNYGLAVEVLHLSQTPR</a>     |
| 18.4  | 2291.1508 | 0.1145  | <a href="#">QFMELEKGYTVLNTIFNTK</a>      |
| 17.9  | 2291.2712 | -0.0059 | <a href="#">VAIESPVPVVMVKPEGFVAPAR</a>   |
| 16.5  | 2291.4821 | -0.2169 | <a href="#">IRVATVIGALLVVAIVAFVLYR</a>   |
| 15.5  | 2291.3187 | -0.0535 | <a href="#">INLRLLMYGVAATIIFAIAGR</a>    |
| 15.2  | 2291.1944 | 0.0709  | <a href="#">IVAMDDPGRALPPGEVGEIAIR</a>   |
| 14.8  | 2291.2273 | 0.0379  | <a href="#">LLOSEAQLTEYIRSFPIGAR</a>     |

Mascot: <http://www.matrixscience.com/>

**MATRIX SCIENCE Mascot Search Results**

**Peptide View Spot no 69**

MS/MS Fragmentation of **RLTGLHETASIDNFSWGVANR**

Found in **gi|19387272** in **NCBI**nr, putative precursor chloroplastic glutamine synthetase [Oryza sativa Japonica Group]

Match to Query 220: 2343.231724 from(2344.239000,1+) intensity(0.0000) index(27)

Title: Label: B19, Spot\_Id: 219963, Peak\_List\_Id: 229166, MSMS Job\_Run\_Id: 22013, Comment:

Data file C:\Documents and Settings\Administrator\Desktop\Farah-Garima 11May 2013\ppw\_B19\_13686833300.txt

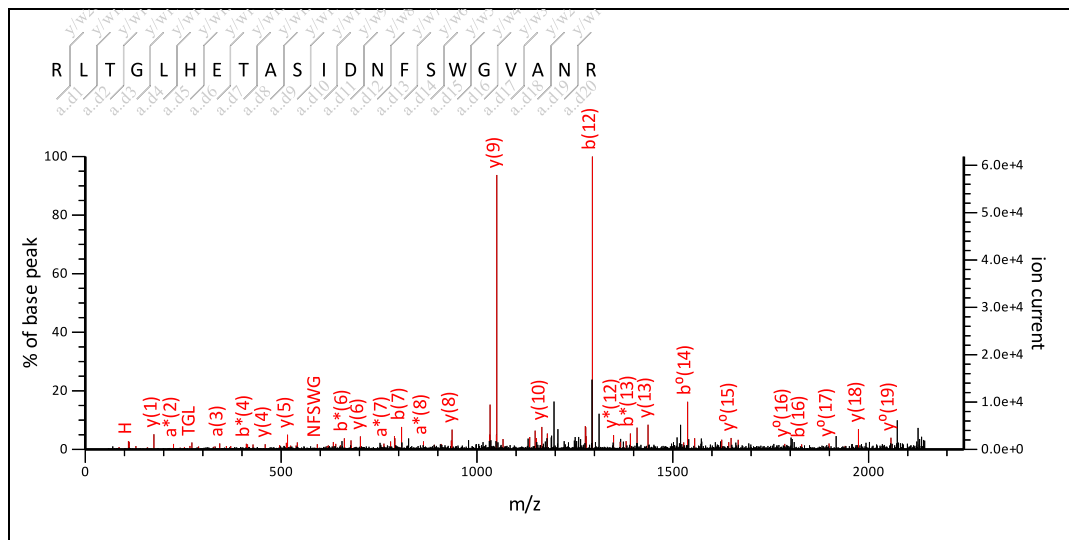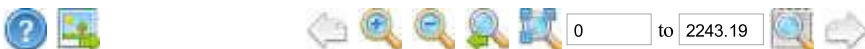

Label all possible matches  Label matches used for scoring

Monoisotopic mass of neutral peptide Mr(calc): 2343.1720

Fixed modifications: Carbamidomethyl (C) (apply to specified residues or termini only)

Ions Score: 88 Expect: 3.1e-05

Matches : 106/401 fragment ions using 147 most intense peaks [\(help\)](#)

| #  | Immon.   | a         | a*        | a <sup>0</sup> | b         | b*        | b <sup>0</sup> | d         | d'        | Seq. | v         | w         | w'        | y         | y*        |
|----|----------|-----------|-----------|----------------|-----------|-----------|----------------|-----------|-----------|------|-----------|-----------|-----------|-----------|-----------|
| 1  | 129.1135 | 129.1135  | 112.0869  |                | 157.1084  | 140.0818  |                | 44.0495   |           | R    |           |           |           |           |           |
| 2  | 86.0964  | 242.1975  | 225.1710  |                | 270.1925  | 253.1659  |                | 200.1506  |           | L    | 2129.9999 | 2129.0047 |           | 2188.0782 | 2171.0516 |
| 3  | 74.0600  | 343.2452  | 326.2187  | 325.2347       | 371.2401  | 354.2136  | 353.2296       | 327.2503  | 329.2296  | T    | 2028.9522 | 2041.9726 | 2043.9519 | 2074.9941 | 2057.9675 |
| 4  | 30.0338  | 400.2667  | 383.2401  | 382.2561       | 428.2616  | 411.2350  | 410.2510       |           |           | G    |           |           |           | 1973.9464 | 1956.9199 |
| 5  | 86.0964  | 513.3507  | 496.3242  | 495.3402       | 541.3457  | 524.3191  | 523.3351       | 471.3038  |           | L    | 1858.8467 | 1857.8515 |           | 1916.9250 | 1899.8984 |
| 6  | 110.0713 | 650.4097  | 633.3831  | 632.3991       | 678.4046  | 661.3780  | 660.3940       |           |           | H    | 1721.7878 |           |           | 1803.8409 | 1786.8143 |
| 7  | 102.0550 | 779.4522  | 762.4257  | 761.4417       | 807.4472  | 790.4206  | 789.4366       | 721.4468  |           | E    | 1592.7452 | 1591.7499 |           | 1666.7820 | 1649.7554 |
| 8  | 74.0600  | 880.4999  | 863.4734  | 862.4894       | 908.4948  | 891.4683  | 890.4843       | 864.5050  | 866.4843  | T    | 1491.6975 | 1504.7179 | 1506.6972 | 1537.7394 | 1520.7128 |
| 9  | 44.0495  | 951.5370  | 934.5105  | 933.5265       | 979.5320  | 962.5054  | 961.5214       |           |           | A    | 1420.6604 |           |           | 1436.6917 | 1419.6652 |
| 10 | 60.0444  | 1038.5691 | 1021.5425 | 1020.5585      | 1066.5640 | 1049.5374 | 1048.5534      | 1022.5742 |           | S    | 1333.6284 | 1332.6331 |           | 1365.6546 | 1348.6280 |
| 11 | 86.0964  | 1151.6531 | 1134.6266 | 1133.6426      | 1179.6480 | 1162.6215 | 1161.6375      | 1123.6218 | 1137.6375 | I    | 1220.5443 | 1233.5647 | 1247.5804 | 1278.6226 | 1261.5960 |
| 12 | 88.0393  | 1266.6801 | 1249.6535 | 1248.6695      | 1294.6750 | 1277.6484 | 1276.6644      | 1222.6902 |           | D    | 1105.5174 | 1104.5221 |           | 1165.5385 | 1148.5119 |
| 13 | 87.0553  | 1380.7230 | 1363.6965 | 1362.7124      | 1408.7179 | 1391.6914 | 1390.7074      | 1337.7172 |           | N    | 991.4744  | 990.4792  |           | 1050.5116 | 1033.4850 |
| 14 | 120.0808 | 1527.7914 | 1510.7649 | 1509.7809      | 1555.7863 | 1538.7598 | 1537.7758      |           |           | F    | 844.4060  |           |           | 936.4686  | 919.4421  |
| 15 | 60.0444  | 1614.8234 | 1597.7969 | 1596.8129      | 1642.8184 | 1625.7918 | 1624.8078      | 1598.8285 |           | S    | 757.3740  | 756.3787  |           | 789.4002  | 772.3737  |
| 16 | 159.0917 | 1800.9028 | 1783.8762 | 1782.8922      | 1828.8977 | 1811.8711 | 1810.8871      |           |           | W    | 571.2947  |           |           | 702.3682  | 685.3416  |
| 17 | 30.0338  | 1857.9242 | 1840.8977 | 1839.9137      | 1885.9191 | 1868.8926 | 1867.9086      |           |           | G    |           |           |           | 516.2889  | 499.2623  |
| 18 | 72.0808  | 1956.9926 | 1939.9661 | 1938.9821      | 1984.9876 | 1967.9610 | 1966.9770      | 1942.9770 |           | V    | 415.2048  | 428.2252  |           | 459.2674  | 442.2409  |
| 19 | 44.0495  | 2028.0298 | 2011.0032 | 2010.0192      | 2056.0247 | 2038.9981 | 2038.0141      |           |           | A    | 344.1677  |           |           | 360.1990  | 343.1724  |
| 20 | 87.0553  | 2142.0727 | 2125.0461 | 2124.0621      | 2170.0676 | 2153.0410 | 2152.0570      | 2099.0669 |           | N    | 230.1248  | 229.1295  |           | 289.1619  | 272.1353  |
| 21 | 129.1135 |           |           |                |           |           |                |           |           | R    | 74.0237   | 73.0284   |           | 175.1190  | 158.0924  |

| Seq | ya | yb | Seq | ya | yb | Seq | ya | yb |
|-----|----|----|-----|----|----|-----|----|----|
|     |    |    |     |    |    |     |    |    |

|        |          |          |         |          |          |        |          |          |
|--------|----------|----------|---------|----------|----------|--------|----------|----------|
| LT     | 187.1441 | 215.1390 | LTG     | 244.1656 | 272.1605 | LTGL   | 357.2496 | 385.2445 |
| LTGLH  | 494.3085 | 522.3035 | LTGLHE  | 623.3511 | 651.3461 | TG     | 131.0815 | 159.0764 |
| TGL    | 244.1656 | 272.1605 | TGLH    | 381.2245 | 409.2194 | TGLHE  | 510.2671 | 538.2620 |
| TGLHET | 611.3148 | 639.3097 | TGLHETA | 682.3519 | 710.3468 | GL     | 143.1179 | 171.1128 |
| GLH    | 280.1768 | 308.1717 | GLHE    | 409.2194 | 437.2143 | GLHET  | 510.2671 | 538.2620 |
| GLHETA | 581.3042 | 609.2991 | GLHETAS | 668.3362 | 696.3311 | LH     | 223.1553 | 251.1503 |
| LHE    | 352.1979 | 380.1928 | LHET    | 453.2456 | 481.2405 | LHETA  | 524.2827 | 552.2776 |
| LHETAS | 611.3148 | 639.3097 | HE      | 239.1139 | 267.1088 | HET    | 340.1615 | 368.1565 |
| HETA   | 411.1987 | 439.1936 | HETAS   | 498.2307 | 526.2256 | HETASI | 611.3148 | 639.3097 |
| ET     | 203.1026 | 231.0975 | ETA     | 274.1397 | 302.1347 | ETAS   | 361.1718 | 389.1667 |
| ETASI  | 474.2558 | 502.2508 | ETASID  | 589.2828 | 617.2777 | TA     | 145.0972 | 173.0921 |
| TAS    | 232.1292 | 260.1241 | TASI    | 345.2132 | 373.2082 | TASID  | 460.2402 | 488.2351 |
| TASIDN | 574.2831 | 602.2780 | AS      | 131.0815 | 159.0764 | ASI    | 244.1656 | 272.1605 |
| ASID   | 359.1925 | 387.1874 | ASIDN   | 473.2354 | 501.2304 | ASIDNF | 620.3039 | 648.2988 |
| SI     | 173.1285 | 201.1234 | SID     | 288.1554 | 316.1503 | SIDN   | 402.1983 | 430.1932 |
| SIDNF  | 549.2667 | 577.2617 | SIDNFS  | 636.2988 | 664.2937 | ID     | 201.1234 | 229.1183 |
| IDN    | 315.1663 | 343.1612 | IDNF    | 462.2347 | 490.2296 | IDNFS  | 549.2667 | 577.2617 |
| DN     | 202.0822 | 230.0771 | DNF     | 349.1506 | 377.1456 | DNFS   | 436.1827 | 464.1776 |
| DNFSW  | 622.2620 | 650.2569 | DNFSWG  | 679.2835 | 707.2784 | NF     | 234.1237 | 262.1186 |
| NFS    | 321.1557 | 349.1506 | NFSW    | 507.2350 | 535.2300 | NFSWG  | 564.2565 | 592.2514 |
| NFSWGV | 663.3249 | 691.3198 | FS      | 207.1128 | 235.1077 | FSW    | 393.1921 | 421.1870 |
| FSWG   | 450.2136 | 478.2085 | FSWGV   | 549.2820 | 577.2769 | FSWGA  | 620.3191 | 648.3140 |
| SW     | 246.1237 | 274.1186 | SWG     | 303.1452 | 331.1401 | SWG    | 402.2136 | 430.2085 |
| SWGVA  | 473.2507 | 501.2456 | SWGVA   | 587.2936 | 615.2885 | WG     | 216.1131 | 244.1081 |
| WGV    | 315.1816 | 343.1765 | WGVA    | 386.2187 | 414.2136 | WGVAN  | 500.2616 | 528.2565 |
| GV     | 129.1022 | 157.0972 | GVA     | 200.1394 | 228.1343 | GVAN   | 314.1823 | 342.1772 |
| VA     | 143.1179 | 171.1128 | VAN     | 257.1608 | 285.1557 | AN     | 158.0924 | 186.0873 |

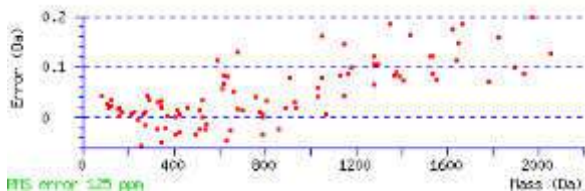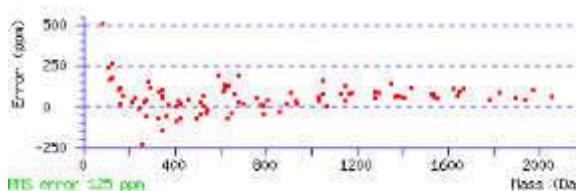

NCBI BLAST search of [RLTGLHETASIDNFSWGVANR](#)  
 (Parameters: blastp, nr protein database, expect=20000, no filter, PAM30)  
 Other BLAST [web gateways](#)

All matches to this query

| Score | Mr(calc)  | Delta   | Sequence                               |
|-------|-----------|---------|----------------------------------------|
| 88.5  | 2343.1720 | 0.0597  | <a href="#">RLTGLHETASIDNFSWGVANR</a>  |
| 21.9  | 2343.2659 | -0.0341 | <a href="#">SNLIASHTPEAGIVAPLNVRR</a>  |
| 21.3  | 2343.0875 | 0.1442  | <a href="#">MUYDAATGQPITGSLMDYAAPR</a> |
| 18.3  | 2343.2910 | -0.0593 | <a href="#">IGLSATQKPIDAVSRFLVGTDR</a> |
| 18.3  | 2343.1648 | 0.0669  | <a href="#">AEAAKFDAVFFADGPALPDHVR</a> |
| 16.9  | 2343.3275 | -0.0957 | <a href="#">DPGVVPEIGSVVTVQVLRINPR</a> |
| 16.2  | 2343.3242 | -0.0925 | <a href="#">KFTSAFIIIGSIYYEPIIR</a>    |
| 15.5  | 2343.2910 | -0.0593 | <a href="#">SAIDSLPPLREVIDTHQLLAR</a>  |
| 15.5  | 2343.2448 | -0.0130 | <a href="#">TLRAHEVVRPTSPSSDFGLSIR</a> |
| 14.8  | 2343.2508 | -0.0191 | <a href="#">ADIIVLAMKPODVFAALDELK</a>  |

Mascot: <http://www.matrixscience.com/>



**MATRIX SCIENCE Mascot Search Results**

**Peptide View Spot no 69**

MS/MS Fragmentation of **AILNLSLRHDLHISAYGEGNER**

Found in **gi|19387272** in **NCBI**nr, putative precursor chloroplastic glutamine synthetase [Oryza sativa Japonica Group]

Match to Query 229: 2477.348724 from(2478.356000,1+) intensity(0.0000) index(29)

Title: Label: B19, Spot\_Id: 219963, Peak\_List\_Id: 229180, MSMS Job\_Run\_Id: 22013, Comment:

Data file C:\Documents and Settings\Administrator\Desktop\Farah-Garima 11May 2013\ppw\_B19\_136868333300.txt

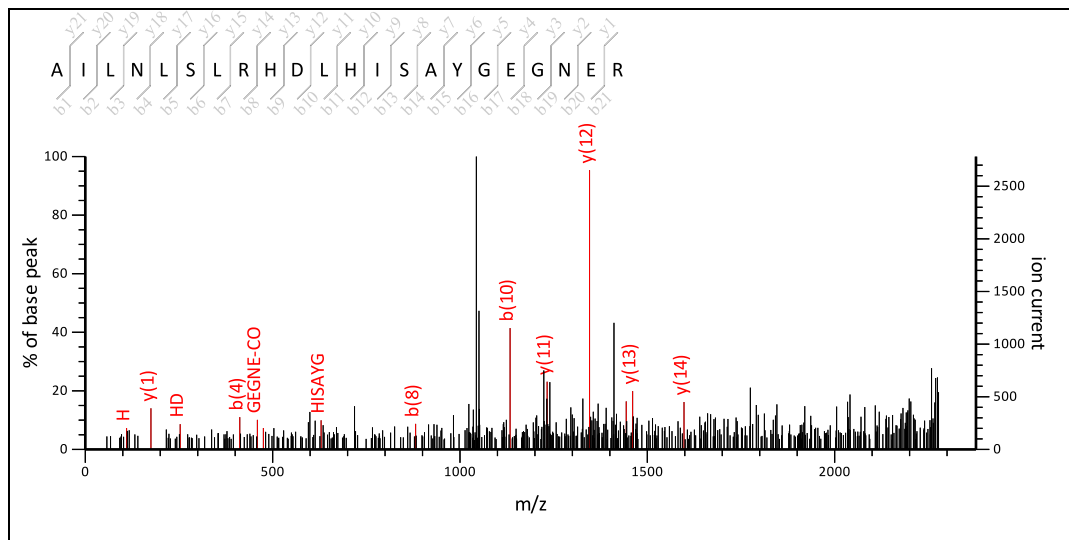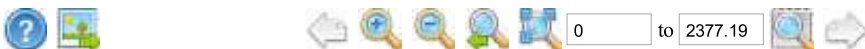

Label all possible matches  Label matches used for scoring

Monoisotopic mass of neutral peptide Mr(calc): 2477.2775

Fixed modifications: Carbamidomethyl (C) (apply to specified residues or termini only)

Ions Score: 6 Expect: 4.4e+03

Matches : 16/414 fragment ions using 46 most intense peaks (help)

| #  | Immon.   | a         | a*        | a <sup>0</sup> | b         | b*        | b <sup>0</sup> | d         | d'        | Seq. | v         | w         | w'        | y         | y*        |
|----|----------|-----------|-----------|----------------|-----------|-----------|----------------|-----------|-----------|------|-----------|-----------|-----------|-----------|-----------|
| 1  | 44.0495  | 44.0495   |           |                | 72.0444   |           |                | 44.0495   |           | A    |           |           |           |           |           |
| 2  | 86.0964  | 157.1335  |           |                | 185.1285  |           |                | 129.1022  | 143.1179  | I    | 2349.1694 | 2362.1898 | 2376.2055 | 2407.2477 | 2390.2211 |
| 3  | 86.0964  | 270.2176  |           |                | 298.2125  |           |                | 228.1707  |           | L    | 2236.0854 | 2235.0901 |           | 2294.1636 | 2277.1371 |
| 4  | 87.0553  | 384.2605  | 367.2340  |                | 412.2554  | 395.2289  |                | 341.2547  |           | N    | 2122.0424 | 2121.0472 |           | 2181.0796 | 2164.0530 |
| 5  | 86.0964  | 497.3446  | 480.3180  |                | 525.3395  | 508.3130  |                | 455.2976  |           | L    | 2008.9584 | 2007.9631 |           | 2067.0366 | 2050.0101 |
| 6  | 60.0444  | 584.3766  | 567.3501  | 566.3661       | 612.3715  | 595.3450  | 594.3610       | 568.3817  |           | S    | 1921.9263 | 1920.9311 |           | 1953.9526 | 1936.9260 |
| 7  | 86.0964  | 697.4607  | 680.4341  | 679.4501       | 725.4556  | 708.4291  | 707.4450       | 655.4137  |           | L    | 1808.8423 | 1807.8470 |           | 1866.9205 | 1849.8940 |
| 8  | 129.1135 | 853.5618  | 836.5352  | 835.5512       | 881.5567  | 864.5302  | 863.5461       | 768.4978  |           | R    | 1652.7412 | 1651.7459 |           | 1753.8365 | 1736.8099 |
| 9  | 110.0713 | 990.6207  | 973.5942  | 972.6101       | 1018.6156 | 1001.5891 | 1000.6051      |           |           | H    | 1515.6823 |           |           | 1597.7354 | 1580.7088 |
| 10 | 88.0393  | 1105.6477 | 1088.6211 | 1087.6371      | 1133.6426 | 1116.6160 | 1115.6320      | 1061.6578 |           | D    | 1400.6553 | 1399.6601 |           | 1460.6764 | 1443.6499 |
| 11 | 86.0964  | 1218.7317 | 1201.7052 | 1200.7212      | 1246.7266 | 1229.7001 | 1228.7161      | 1176.6848 |           | L    | 1287.5713 | 1286.5760 |           | 1345.6495 | 1328.6230 |
| 12 | 110.0713 | 1355.7906 | 1338.7641 | 1337.7801      | 1383.7855 | 1366.7590 | 1365.7750      |           |           | H    | 1150.5123 |           |           | 1232.5654 | 1215.5389 |
| 13 | 86.0964  | 1468.8747 | 1451.8481 | 1450.8641      | 1496.8696 | 1479.8431 | 1478.8590      | 1440.8434 | 1454.8590 | I    | 1037.4283 | 1050.4487 | 1064.4643 | 1095.5065 | 1078.4800 |
| 14 | 60.0444  | 1555.9067 | 1538.8802 | 1537.8962      | 1583.9016 | 1566.8751 | 1565.8911      | 1539.9118 |           | S    | 950.3962  | 949.4010  |           | 982.4225  | 965.3959  |
| 15 | 44.0495  | 1626.9438 | 1609.9173 | 1608.9333      | 1654.9387 | 1637.9122 | 1636.9282      |           |           | A    | 879.3591  |           |           | 895.3904  | 878.3639  |
| 16 | 136.0757 | 1790.0072 | 1772.9806 | 1771.9966      | 1818.0021 | 1800.9755 | 1799.9915      |           |           | Y    | 716.2958  |           |           | 824.3533  | 807.3268  |
| 17 | 30.0338  | 1847.0286 | 1830.0021 | 1829.0181      | 1875.0235 | 1857.9970 | 1857.0130      |           |           | G    |           |           |           | 661.2900  | 644.2634  |
| 18 | 102.0550 | 1976.0712 | 1959.0447 | 1958.0607      | 2004.0661 | 1987.0396 | 1986.0556      | 1918.0657 |           | E    | 530.2317  | 529.2365  |           | 604.2685  | 587.2420  |
| 19 | 30.0338  | 2033.0927 | 2016.0661 | 2015.0821      | 2061.0876 | 2044.0610 | 2043.0770      |           |           | G    |           |           |           | 475.2259  | 458.1994  |
| 20 | 87.0553  | 2147.1356 | 2130.1091 | 2129.1250      | 2175.1305 | 2158.1040 | 2157.1200      | 2104.1298 |           | N    | 359.1674  | 358.1721  |           | 418.2045  | 401.1779  |
| 21 | 102.0550 | 2276.1782 | 2259.1517 | 2258.1676      | 2304.1731 | 2287.1466 | 2286.1626      | 2218.1727 |           | E    | 230.1248  | 229.1295  |           | 304.1615  | 287.1350  |
| 22 | 129.1135 |           |           |                |           |           |                |           |           | R    | 74.0237   | 73.0284   |           | 175.1190  | 158.0924  |

| Seq    | ya       | yb       | Seq     | ya       | yb       | Seq    | ya       | yb       |
|--------|----------|----------|---------|----------|----------|--------|----------|----------|
| IL     | 199.1805 | 227.1754 | ILN     | 313.2234 | 341.2183 | ILNL   | 426.3075 | 454.3024 |
| ILNLS  | 513.3395 | 541.3344 | ILNLSL  | 626.4236 | 654.4185 | LN     | 200.1394 | 228.1343 |
| LNL    | 313.2234 | 341.2183 | LNLS    | 400.2554 | 428.2504 | LNLSL  | 513.3395 | 541.3344 |
| LNLSLR | 669.4406 | 697.4355 | NL      | 200.1394 | 228.1343 | NLS    | 287.1714 | 315.1663 |
| NLSL   | 400.2554 | 428.2504 | NLSLR   | 556.3566 | 584.3515 | NLSLRH | 693.4155 | 721.4104 |
| LS     | 173.1285 | 201.1234 | LSL     | 286.2125 | 314.2074 | LSLR   | 442.3136 | 470.3085 |
| LSLRH  | 579.3725 | 607.3675 | LSLRHD  | 694.3995 | 722.3944 | SL     | 173.1285 | 201.1234 |
| SLR    | 329.2296 | 357.2245 | SLRH    | 466.2885 | 494.2834 | SLRHD  | 581.3154 | 609.3103 |
| SLRHDL | 694.3995 | 722.3944 | LR      | 242.1975 | 270.1925 | LRH    | 379.2564 | 407.2514 |
| LRHD   | 494.2834 | 522.2783 | LRHDL   | 607.3675 | 635.3624 | RH     | 266.1724 | 294.1673 |
| RHD    | 381.1993 | 409.1942 | RHDL    | 494.2834 | 522.2783 | RHDLH  | 631.3423 | 659.3372 |
| HD     | 225.0982 | 253.0931 | HDL     | 338.1823 | 366.1772 | HDLH   | 475.2412 | 503.2361 |
| HDLHI  | 588.3253 | 616.3202 | HDLHIS  | 675.3573 | 703.3522 | DL     | 201.1234 | 229.1183 |
| DLH    | 338.1823 | 366.1772 | DLHI    | 451.2663 | 479.2613 | DLHIS  | 538.2984 | 566.2933 |
| DLHISA | 609.3355 | 637.3304 | LH      | 223.1553 | 251.1503 | LHI    | 336.2394 | 364.2343 |
| LHIS   | 423.2714 | 451.2663 | LHISA   | 494.3085 | 522.3035 | LHISAY | 657.3719 | 685.3668 |
| HI     | 223.1553 | 251.1503 | HIS     | 310.1874 | 338.1823 | HISA   | 381.2245 | 409.2194 |
| HISAY  | 544.2878 | 572.2827 | HISAYG  | 601.3093 | 629.3042 | IS     | 173.1285 | 201.1234 |
| ISA    | 244.1656 | 272.1605 | ISAY    | 407.2289 | 435.2238 | ISAYG  | 464.2504 | 492.2453 |
| ISAYGE | 593.2930 | 621.2879 | ISAYGEG | 650.3144 | 678.3093 | SA     | 131.0815 | 159.0764 |
| SAY    | 294.1448 | 322.1397 | SAYG    | 351.1663 | 379.1612 | SAYGE  | 480.2089 | 508.2038 |
| SAYGEG | 537.2304 | 565.2253 | SAYGEGN | 651.2733 | 679.2682 | AY     | 207.1128 | 235.1077 |
| AYG    | 264.1343 | 292.1292 | AYGE    | 393.1769 | 421.1718 | AYGEG  | 450.1983 | 478.1932 |
| AYGEGN | 564.2413 | 592.2362 | AYGEGNE | 693.2838 | 721.2788 | YG     | 193.0972 | 221.0921 |
| YGE    | 322.1397 | 350.1347 | YGEG    | 379.1612 | 407.1561 | YGEGN  | 493.2041 | 521.1991 |
| YGEGNE | 622.2467 | 650.2416 | GE      | 159.0764 | 187.0713 | GEG    | 216.0979 | 244.0928 |
| GEGN   | 330.1408 | 358.1357 | GEGNE   | 459.1834 | 487.1783 | EG     | 159.0764 | 187.0713 |
| EGN    | 273.1193 | 301.1143 | EGNE    | 402.1619 | 430.1569 | GN     | 144.0768 | 172.0717 |
| GNE    | 273.1193 | 301.1143 | NE      | 216.0979 | 244.0928 |        |          |          |

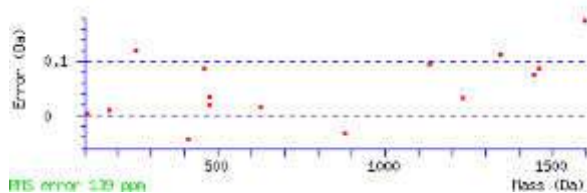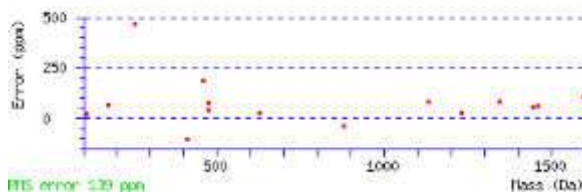

NCBI BLAST search of [AILNLSLRHDLHISAYGEGNER](#)  
 (Parameters: blastp, nr protein database, expect=20000, no filter, PAM30)  
 Other BLAST [web gateways](#)

All matches to this query

| Score | Mr(calcd) | Delta  | Sequence                                   |
|-------|-----------|--------|--------------------------------------------|
| 8.8   | 2477.1719 | 0.1768 | <a href="#">YTMGTGVGGLFMGNDSIGSILSWR</a>   |
| 8.0   | 2477.3082 | 0.0405 | <a href="#">ILGVWAFALIWTIAPMFGWNR</a>      |
| 6.3   | 2477.2775 | 0.0713 | <a href="#">AILNLSLRHDLHISAYGEGNER</a>     |
| 5.5   | 2477.2737 | 0.0751 | <a href="#">LEKTYQCPLLVYDHNPLGEVPR</a>     |
| 4.8   | 2477.2836 | 0.0652 | <a href="#">SLGNATIFNODVLDLLEKEICK</a>     |
| 4.5   | 2477.2551 | 0.0937 | <a href="#">GGSGTPGLPVIKPDPDADAKHFSSK</a>  |
| 3.3   | 2477.2914 | 0.0573 | <a href="#">GFAHATLYKTLVEGISANETLSR</a>    |
| 3.1   | 2477.3173 | 0.0314 | <a href="#">HASSVGTIGSHVMILNTGSIKNVR</a>   |
| 3.0   | 2477.3087 | 0.0400 | <a href="#">KSSAILDEYIGMIVTDANLAIPK</a>    |
| 2.5   | 2477.1881 | 0.1606 | <a href="#">SNTGVGSTPAISADSGSTAEAEILSR</a> |

Mascot: <http://www.matrixscience.com/>



**MATRIX SCIENCE Mascot Search Results**

**Peptide View Spot no 69**

MS/MS Fragmentation of **GGNNILVMCDTYTPAGEPIPTNKR**

Found in **gi|19387272** in **NCBI**nr, putative precursor chloroplastic glutamine synthetase [Oryza sativa Japonica Group]

Match to Query 234: 2617.339424 from(2618.346700,1+) intensity(0.0000) index(30)

Title: Label: B19, Spot\_Id: 219963, Peak\_List\_Id: 229168, MSMS Job\_Run\_Id: 22013, Comment:

Data file C:\Documents and Settings\Administrator\Desktop\Farah-Garima 11May 2013\ppw\_B19\_13686833300.txt

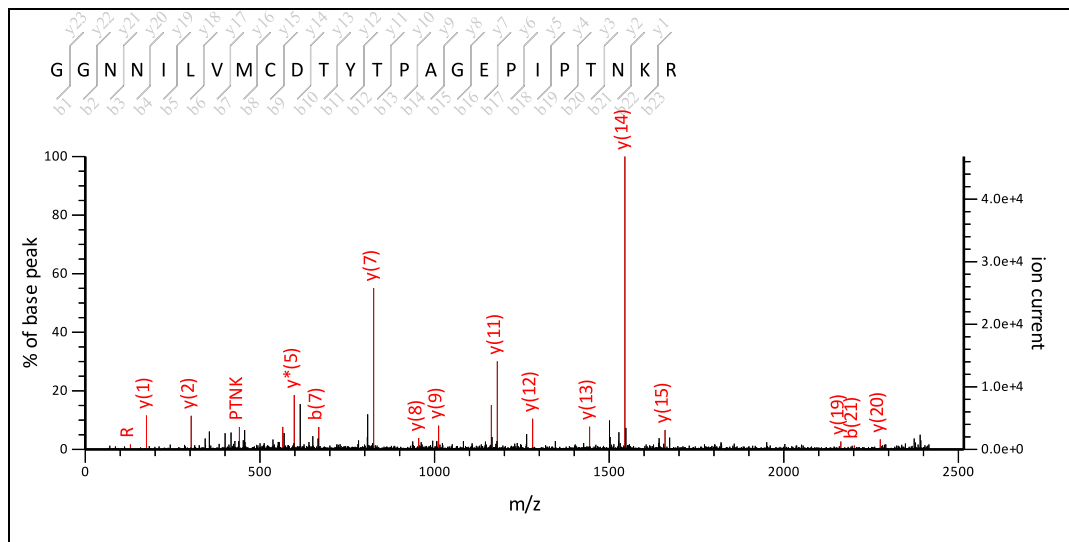

Navigation icons: Home, Back, Forward, Search, etc. Range: 0 to 2515.52

Label all possible matches  Label matches used for scoring

Monoisotopic mass of neutral peptide Mr(calc): 2617.2628

Fixed modifications: Carbamidomethyl (C) (apply to specified residues or termini only)

Ions Score: 97 Expect: 3.6e-06

Matches : 21/464 fragment ions using 24 most intense peaks [\(help\)](#)

| #  | Immon.   | a         | a*        | a <sup>0</sup> | b         | b*        | b <sup>0</sup> | d         | d'        | Seq. | v         | w         | w'        | y         | y*        |
|----|----------|-----------|-----------|----------------|-----------|-----------|----------------|-----------|-----------|------|-----------|-----------|-----------|-----------|-----------|
| 1  | 30.0338  | 30.0338   |           |                | 58.0287   |           |                | 44.0495   |           | G    |           |           |           |           |           |
| 2  | 30.0338  | 87.0553   |           |                | 115.0502  |           |                |           |           | G    |           |           |           | 2561.2487 | 2544.2221 |
| 3  | 87.0553  | 201.0982  | 184.0717  |                | 229.0931  | 212.0666  |                | 158.0924  |           | N    | 2445.1901 | 2444.1948 |           | 2504.2272 | 2487.2007 |
| 4  | 87.0553  | 315.1411  | 298.1146  |                | 343.1361  | 326.1095  |                | 272.1353  |           | N    | 2331.1472 | 2330.1519 |           | 2390.1843 | 2373.1577 |
| 5  | 86.0964  | 428.2252  | 411.1987  |                | 456.2201  | 439.1936  |                | 400.1939  | 414.2096  | I    | 2218.0631 | 2231.0835 | 2245.0992 | 2276.1414 | 2259.1148 |
| 6  | 86.0964  | 541.3093  | 524.2827  |                | 569.3042  | 552.2776  |                | 499.2623  |           | L    | 2104.9790 | 2103.9838 |           | 2163.0573 | 2146.0307 |
| 7  | 72.0808  | 640.3777  | 623.3511  |                | 668.3726  | 651.3461  |                | 626.3620  |           | V    | 2005.9106 | 2018.9310 |           | 2049.9732 | 2032.9467 |
| 8  | 104.0528 | 771.4182  | 754.3916  |                | 799.4131  | 782.3865  |                | 711.4148  |           | M    | 1874.8701 | 1873.8749 |           | 1950.9048 | 1933.8783 |
| 9  | 133.0430 | 931.4488  | 914.4223  |                | 959.4437  | 942.4172  |                | 842.4553  |           | C    | 1714.8395 | 1713.8442 |           | 1819.8643 | 1802.8378 |
| 10 | 88.0393  | 1046.4758 | 1029.4492 | 1028.4652      | 1074.4707 | 1057.4441 | 1056.4601      | 1002.4859 |           | D    | 1599.8125 | 1598.8173 |           | 1659.8337 | 1642.8071 |
| 11 | 74.0600  | 1147.5234 | 1130.4969 | 1129.5129      | 1175.5184 | 1158.4918 | 1157.5078      | 1131.5285 | 1133.5078 | T    | 1498.7649 | 1511.7853 | 1513.7645 | 1544.8067 | 1527.7802 |
| 12 | 136.0757 | 1310.5868 | 1293.5602 | 1292.5762      | 1338.5817 | 1321.5551 | 1320.5711      |           |           | Y    | 1335.7015 |           |           | 1443.7591 | 1426.7325 |
| 13 | 74.0600  | 1411.6344 | 1394.6079 | 1393.6239      | 1439.6294 | 1422.6028 | 1421.6188      | 1395.6395 | 1397.6188 | T    | 1234.6539 | 1247.6743 | 1249.6535 | 1280.6957 | 1263.6692 |
| 14 | 70.0651  | 1508.6872 | 1491.6607 | 1490.6766      | 1536.6821 | 1519.6556 | 1518.6716      | 1482.6716 |           | P    | 1137.6011 | 1136.6058 |           | 1179.6480 | 1162.6215 |
| 15 | 44.0495  | 1579.7243 | 1562.6978 | 1561.7138      | 1607.7192 | 1590.6927 | 1589.7087      |           |           | A    | 1066.5640 |           |           | 1082.5953 | 1065.5687 |
| 16 | 30.0338  | 1636.7458 | 1619.7192 | 1618.7352      | 1664.7407 | 1647.7142 | 1646.7301      |           |           | G    |           |           |           | 1011.5582 | 994.5316  |
| 17 | 102.0550 | 1765.7884 | 1748.7618 | 1747.7778      | 1793.7833 | 1776.7568 | 1775.7727      | 1707.7829 |           | E    | 880.4999  | 879.5047  |           | 954.5367  | 937.5102  |
| 18 | 70.0651  | 1862.8411 | 1845.8146 | 1844.8306      | 1890.8361 | 1873.8095 | 1872.8255      | 1836.8255 |           | P    | 783.4472  | 782.4519  |           | 825.4941  | 808.4676  |
| 19 | 86.0964  | 1975.9252 | 1958.8987 | 1957.9146      | 2003.9201 | 1986.8936 | 1985.9096      | 1947.8939 | 1961.9096 | I    | 670.3631  | 683.3835  | 697.3991  | 728.4413  | 711.4148  |
| 20 | 70.0651  | 2072.9780 | 2055.9514 | 2054.9674      | 2100.9729 | 2083.9463 | 2082.9623      | 2046.9623 |           | P    | 573.3103  | 572.3151  |           | 615.3573  | 598.3307  |
| 21 | 74.0600  | 2174.0257 | 2156.9991 | 2156.0151      | 2202.0206 | 2184.9940 | 2184.0100      | 2158.0307 | 2160.0100 | T    | 472.2627  | 485.2831  | 487.2623  | 518.3045  | 501.2780  |
| 22 | 87.0553  | 2288.0686 | 2271.0420 | 2270.0580      | 2316.0635 | 2299.0369 | 2298.0529      | 2245.0628 |           | N    | 358.2197  | 357.2245  |           | 417.2568  | 400.2303  |

|    |          |           |           |           |           |           |           |           |  |   |          |          |  |          |          |
|----|----------|-----------|-----------|-----------|-----------|-----------|-----------|-----------|--|---|----------|----------|--|----------|----------|
| 23 | 101.1073 | 2416.1635 | 2399.1370 | 2398.1530 | 2444.1585 | 2427.1319 | 2426.1479 | 2359.1057 |  | K | 230.1248 | 229.1295 |  | 303.2139 | 286.1874 |
| 24 | 129.1135 |           |           |           |           |           |           |           |  | R | 74.0237  | 73.0284  |  | 175.1190 | 158.0924 |

| Seq    | ya       | yb       | Seq     | ya       | yb       | Seq    | ya       | yb       |
|--------|----------|----------|---------|----------|----------|--------|----------|----------|
| GN     | 144.0768 | 172.0717 | GNN     | 258.1197 | 286.1146 | GNNI   | 371.2037 | 399.1987 |
| GNNIL  | 484.2878 | 512.2827 | GNNILV  | 583.3562 | 611.3511 | NN     | 201.0982 | 229.0931 |
| NNI    | 314.1823 | 342.1772 | NNIL    | 427.2663 | 455.2613 | NNILV  | 526.3348 | 554.3297 |
| NNILVM | 657.3752 | 685.3702 | NI      | 200.1394 | 228.1343 | NIL    | 313.2234 | 341.2183 |
| NILV   | 412.2918 | 440.2867 | NILVM   | 543.3323 | 571.3272 | IL     | 199.1805 | 227.1754 |
| ILV    | 298.2489 | 326.2438 | ILVM    | 429.2894 | 457.2843 | ILVMC  | 589.3200 | 617.3150 |
| LV     | 185.1648 | 213.1598 | LVM     | 316.2053 | 344.2002 | LVMC   | 476.2360 | 504.2309 |
| LVMCD  | 591.2629 | 619.2578 | LVMCDT  | 692.3106 | 720.3055 | VM     | 203.1213 | 231.1162 |
| VMC    | 363.1519 | 391.1468 | VMCD    | 478.1789 | 506.1738 | VMCDT  | 579.2265 | 607.2214 |
| MC     | 264.0835 | 292.0784 | MCD     | 379.1104 | 407.1054 | MCDT   | 480.1581 | 508.1530 |
| MCDTY  | 643.2214 | 671.2164 | CD      | 248.0700 | 276.0649 | CDT    | 349.1176 | 377.1125 |
| CDTY   | 512.1810 | 540.1759 | CDTYT   | 613.2286 | 641.2236 | DT     | 189.0870 | 217.0819 |
| DTY    | 352.1503 | 380.1452 | DTYT    | 453.1980 | 481.1929 | DTYTP  | 550.2508 | 578.2457 |
| DTYTPA | 621.2879 | 649.2828 | DTYTPAG | 678.3093 | 706.3042 | TY     | 237.1234 | 265.1183 |
| TYT    | 338.1710 | 366.1660 | TYTP    | 435.2238 | 463.2187 | TYTPA  | 506.2609 | 534.2558 |
| TYTPAG | 563.2824 | 591.2773 | TYTPAGE | 692.3250 | 720.3199 | YT     | 237.1234 | 265.1183 |
| YTP    | 334.1761 | 362.1710 | YTPA    | 405.2132 | 433.2082 | YTPAG  | 462.2347 | 490.2296 |
| YTPAGE | 591.2773 | 619.2722 | YTPAGEP | 688.3301 | 716.3250 | TP     | 171.1128 | 199.1077 |
| TPA    | 242.1499 | 270.1448 | TPAG    | 299.1714 | 327.1663 | TPAGE  | 428.2140 | 456.2089 |
| TPAGEP | 525.2667 | 553.2617 | TPAGEPI | 638.3508 | 666.3457 | PA     | 141.1022 | 169.0972 |
| PAG    | 198.1237 | 226.1186 | PAGE    | 327.1663 | 355.1612 | PAGEP  | 424.2191 | 452.2140 |
| PAGEPI | 537.3031 | 565.2980 | PAGEPIP | 634.3559 | 662.3508 | AG     | 101.0709 | 129.0659 |
| AGE    | 230.1135 | 258.1084 | AGEP    | 327.1663 | 355.1612 | AGEPI  | 440.2504 | 468.2453 |
| AGEPIP | 537.3031 | 565.2980 | AGEPIPT | 638.3508 | 666.3457 | GE     | 159.0764 | 187.0713 |
| GEP    | 256.1292 | 284.1241 | GEPI    | 369.2132 | 397.2082 | GEPIP  | 466.2660 | 494.2609 |
| GEPIPT | 567.3137 | 595.3086 | GEPIPTN | 681.3566 | 709.3515 | EP     | 199.1077 | 227.1026 |
| EPI    | 312.1918 | 340.1867 | EPIP    | 409.2445 | 437.2395 | EPIPT  | 510.2922 | 538.2871 |
| EPIPTN | 624.3352 | 652.3301 | PI      | 183.1492 | 211.1441 | PIP    | 280.2020 | 308.1969 |
| PIPT   | 381.2496 | 409.2445 | PIPTN   | 495.2926 | 523.2875 | PIPTNK | 623.3875 | 651.3824 |
| IP     | 183.1492 | 211.1441 | IPT     | 284.1969 | 312.1918 | IPTN   | 398.2398 | 426.2347 |
| IPTNK  | 526.3348 | 554.3297 | PT      | 171.1128 | 199.1077 | PTN    | 285.1557 | 313.1506 |
| PTNK   | 413.2507 | 441.2456 | TN      | 188.1030 | 216.0979 | TNK    | 316.1979 | 344.1928 |
| NK     | 215.1503 | 243.1452 |         |          |          |        |          |          |

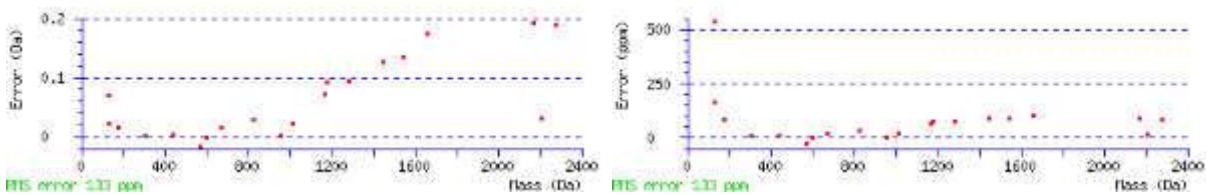

NCBI BLAST search of [GGNNILVMCDTYTPAGEPIPTNK](#)  
 (Parameters: blast, nr protein database, expect=20000, no filter, PAM30)  
 Other BLAST [web gateways](#)

All matches to this query

| Score | Mr(calc)  | Delta   | Sequence                                   |
|-------|-----------|---------|--------------------------------------------|
| 97.3  | 2617.2628 | 0.0766  | <a href="#">GGNNILVMCDTYTPAGEPIPTNK</a>    |
| 25.6  | 2617.3284 | 0.0110  | <a href="#">TSFHIIELDTYTTMDTLIAMKR</a>     |
| 15.2  | 2617.5604 | -0.2210 | <a href="#">AGLLPLGLGLALLVALSMALSAPLAR</a> |
| 14.7  | 2617.3785 | -0.0391 | <a href="#">QTYTQTLLAAVPKLGAMQGSDLPAK</a>  |
| 14.7  | 2617.4010 | -0.0616 | <a href="#">TIIVQLNESVKITCVRPYSNOR</a>     |
| 14.5  | 2617.3924 | -0.0530 | <a href="#">IEQLMLKILPEYTVGDPSLETTK</a>    |

|      |           |         |                                           |
|------|-----------|---------|-------------------------------------------|
| 13.4 | 2617.5128 | -0.1734 | <a href="#">LEIMKDSAIGTYGVLALILSLIR</a>   |
| 12.2 | 2617.3612 | -0.0218 | <a href="#">LPREATPAQHVOYINELSDLPAR</a>   |
| 11.9 | 2617.3210 | 0.0184  | <a href="#">FGGDEFVVILGGSPPOEMIAAIAOR</a> |
| 11.0 | 2617.3758 | -0.0364 | <a href="#">TAISVQDAAAHAATPGASVVPRLGR</a> |

Mascot: <http://www.matrixscience.com/>

**MATRIX SCIENCE Mascot Search Results**

**Peptide View Spot no 69**

MS/MS Fragmentation of **GGNNILVMCDTYTPAGEPIPTNKR**

Found in **gi|19387272** in **NCBI**nr, putative precursor chloroplastic glutamine synthetase [Oryza sativa Japonica Group]

Match to Query 237: 2633.335024 from(2634.342300,1+) intensity(0.0000) index(31)

Title: Label: B19, Spot\_Id: 219963, Peak\_List\_Id: 229174, MSMS Job\_Run\_Id: 22013, Comment:

Data file C:\Documents and Settings\Administrator\Desktop\Farah-Garima 11May 2013\ppw\_B19\_136868333300.txt

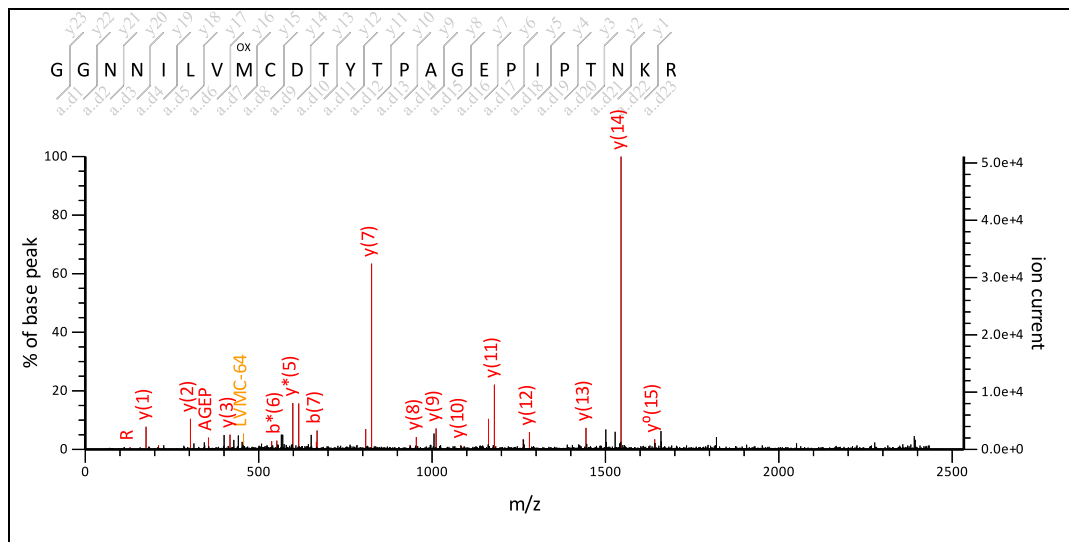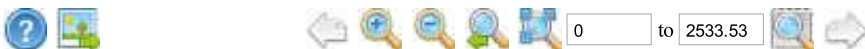

Label all possible matches  Label matches used for scoring

Monoisotopic mass of neutral peptide Mr(calc): 2633.2578  
 Fixed modifications: Carbamidomethyl (C) (apply to specified residues or termini only)  
 Variable modifications:  
 M8 : Oxidation (M), with neutral losses 0.0000 (shown in table), 63.9983  
 Ions Score: 66 Expect: 0.0043  
 Matches : 35/632 fragment ions using 48 most intense peaks ([help](#))

| #  | Immon.   | a         | a*        | a <sup>0</sup> | b               | b*              | b <sup>0</sup> | d         | d'        | Seq. | v         | w         | w'        | y                | y*               |
|----|----------|-----------|-----------|----------------|-----------------|-----------------|----------------|-----------|-----------|------|-----------|-----------|-----------|------------------|------------------|
| 1  | 30.0338  | 30.0338   |           |                | 58.0287         |                 |                | 44.0495   |           | G    |           |           |           |                  |                  |
| 2  | 30.0338  | 87.0553   |           |                | 115.0502        |                 |                |           |           | G    |           |           |           | 2577.2436        | 2560.2170        |
| 3  | 87.0553  | 201.0982  | 184.0717  |                | 229.0931        | 212.0666        |                | 158.0924  |           | N    | 2461.1850 | 2460.1898 |           | 2520.2221        | 2503.1956        |
| 4  | 87.0553  | 315.1411  | 298.1146  |                | 343.1361        | 326.1095        |                | 272.1353  |           | N    | 2347.1421 | 2346.1468 |           | 2406.1792        | 2389.1526        |
| 5  | 86.0964  | 428.2252  | 411.1987  |                | <b>456.2201</b> | 439.1936        |                | 400.1939  | 414.2096  | I    | 2234.0580 | 2247.0784 | 2261.0941 | 2292.1363        | 2275.1097        |
| 6  | 86.0964  | 541.3093  | 524.2827  |                | 569.3042        | <b>552.2776</b> |                | 499.2623  |           | L    | 2120.9740 | 2119.9787 |           | 2179.0522        | 2162.0257        |
| 7  | 72.0808  | 640.3777  | 623.3511  |                | <b>668.3726</b> | 651.3461        |                | 626.3620  |           | V    | 2021.9055 | 2034.9259 |           | 2065.9681        | 2048.9416        |
| 8  | 120.0478 | 787.4131  | 770.3865  |                | 815.4080        | 798.3815        |                | 711.4148  |           | M    | 1874.8701 | 1873.8749 |           | 1966.8997        | 1949.8732        |
| 9  | 133.0430 | 947.4437  | 930.4172  |                | 975.4386        | 958.4121        |                | 858.4502  |           | C    | 1714.8395 | 1713.8442 |           | 1819.8643        | 1802.8378        |
| 10 | 88.0393  | 1062.4707 | 1045.4441 | 1044.4601      | 1090.4656       | 1073.4390       | 1072.4550      | 1018.4808 |           | D    | 1599.8125 | 1598.8173 |           | 1659.8337        | 1642.8071        |
| 11 | 74.0600  | 1163.5184 | 1146.4918 | 1145.5078      | 1191.5133       | 1174.4867       | 1173.5027      | 1147.5234 | 1149.5027 | T    | 1498.7649 | 1511.7853 | 1513.7645 | <b>1544.8067</b> | 1527.7802        |
| 12 | 136.0757 | 1326.5817 | 1309.5551 | 1308.5711      | 1354.5766       | 1337.5501       | 1336.5660      |           |           | Y    | 1335.7015 |           |           | <b>1443.7591</b> | 1426.7325        |
| 13 | 74.0600  | 1427.6294 | 1410.6028 | 1409.6188      | 1455.6243       | 1438.5977       | 1437.6137      | 1411.6344 | 1413.6137 | T    | 1234.6539 | 1247.6743 | 1249.6535 | <b>1280.6957</b> | 1263.6692        |
| 14 | 70.0651  | 1524.6821 | 1507.6556 | 1506.6716      | 1552.6770       | 1535.6505       | 1534.6665      | 1498.6665 |           | P    | 1137.6011 | 1136.6058 |           | <b>1179.6480</b> | <b>1162.6215</b> |
| 15 | 44.0495  | 1595.7192 | 1578.6927 | 1577.7087      | 1623.7142       | 1606.6876       | 1605.7036      |           |           | A    | 1066.5640 |           |           | <b>1082.5953</b> | 1065.5687        |
| 16 | 30.0338  | 1652.7407 | 1635.7142 | 1634.7301      | 1680.7356       | 1663.7091       | 1662.7251      |           |           | G    |           |           |           | <b>1011.5582</b> | 994.5316         |
| 17 | 102.0550 | 1781.7833 | 1764.7568 | 1763.7727      | 1809.7782       | 1792.7517       | 1791.7676      | 1723.7778 |           | E    | 880.4999  | 879.5047  |           | <b>954.5367</b>  | 937.5102         |
| 18 | 70.0651  | 1878.8361 | 1861.8095 | 1860.8255      | 1906.8310       | 1889.8044       | 1888.8204      | 1852.8204 |           | P    | 783.4472  | 782.4519  |           | <b>825.4941</b>  | <b>808.4676</b>  |
| 19 | 86.0964  | 1991.9201 | 1974.8936 | 1973.9096      | 2019.9150       | 2002.8885       | 2001.9045      | 1963.8888 | 1977.9045 | I    | 670.3631  | 683.3835  | 697.3991  | 728.4413         | 711.4148         |
| 20 | 70.0651  | 2088.9729 | 2071.9463 | 2070.9623      | 2116.9678       | 2099.9413       | 2098.9572      | 2062.9572 |           | P    | 573.3103  | 572.3151  |           | <b>615.3573</b>  | <b>598.3307</b>  |
| 21 | 74.0600  | 2190.0206 | 2172.9940 | 2172.0100      | 2218.0155       | 2200.9889       | 2200.0049      | 2174.0257 | 2176.0049 | T    | 472.2627  | 485.2831  | 487.2623  | 518.3045         | 501.2780         |

|    |          |           |           |           |           |           |           |           |  |   |          |          |  |          |          |
|----|----------|-----------|-----------|-----------|-----------|-----------|-----------|-----------|--|---|----------|----------|--|----------|----------|
| 22 | 87.0553  | 2304.0635 | 2287.0369 | 2286.0529 | 2332.0584 | 2315.0319 | 2314.0478 | 2261.0577 |  | N | 358.2197 | 357.2245 |  | 417.2568 | 400.2303 |
| 23 | 101.1073 | 2432.1585 | 2415.1319 | 2414.1479 | 2460.1534 | 2443.1268 | 2442.1428 | 2375.1006 |  | K | 230.1248 | 229.1295 |  | 303.2139 | 286.1874 |
| 24 | 129.1135 |           |           |           |           |           |           |           |  | R | 74.0237  | 73.0284  |  | 175.1190 | 158.0924 |

| Seq     | ya       | yb       | Seq    | ya       | yb       | Seq    | ya       | yb       |
|---------|----------|----------|--------|----------|----------|--------|----------|----------|
| GN      | 144.0768 | 172.0717 | GNN    | 258.1197 | 286.1146 | GNNI   | 371.2037 | 399.1987 |
| GNNIL   | 484.2878 | 512.2827 | GNNILV | 583.3562 | 611.3511 | NN     | 201.0982 | 229.0931 |
| NNI     | 314.1823 | 342.1772 | NNIL   | 427.2663 | 455.2613 | NNILV  | 526.3348 | 554.3297 |
| NNILVM  | 673.3702 | 701.3651 | NI     | 200.1394 | 228.1343 | NIL    | 313.2234 | 341.2183 |
| NILV    | 412.2918 | 440.2867 | NILVM  | 559.3272 | 587.3221 | IL     | 199.1805 | 227.1754 |
| ILV     | 298.2489 | 326.2438 | ILVM   | 445.2843 | 473.2792 | ILVMC  | 605.3150 | 633.3099 |
| LV      | 185.1648 | 213.1598 | LVM    | 332.2002 | 360.1952 | LVMC   | 492.2309 | 520.2258 |
| LVMCD   | 607.2578 | 635.2527 | VM     | 219.1162 | 247.1111 | VMC    | 379.1468 | 407.1417 |
| VMCD    | 494.1738 | 522.1687 | VMCDT  | 595.2214 | 623.2164 | MC     | 280.0784 | 308.0733 |
| MCD     | 395.1054 | 423.1003 | MCDT   | 496.1530 | 524.1479 | MCDTY  | 659.2164 | 687.2113 |
| CD      | 248.0700 | 276.0649 | CDT    | 349.1176 | 377.1125 | CDTY   | 512.1810 | 540.1759 |
| CDTYT   | 613.2286 | 641.2236 | DT     | 189.0870 | 217.0819 | DTY    | 352.1503 | 380.1452 |
| DTYT    | 453.1980 | 481.1929 | DTYTP  | 550.2508 | 578.2457 | DTYTPA | 621.2879 | 649.2828 |
| DTYTPAG | 678.3093 | 706.3042 | TY     | 237.1234 | 265.1183 | TYT    | 338.1710 | 366.1660 |
| TYTP    | 435.2238 | 463.2187 | TYTPA  | 506.2609 | 534.2558 | TYTPAG | 563.2824 | 591.2773 |
| TYTPAGE | 692.3250 | 720.3199 | YT     | 237.1234 | 265.1183 | YTP    | 334.1761 | 362.1710 |
| YTPA    | 405.2132 | 433.2082 | YTPAG  | 462.2347 | 490.2296 | YTPAGE | 591.2773 | 619.2722 |
| YTPAGEP | 688.3301 | 716.3250 | TP     | 171.1128 | 199.1077 | TPA    | 242.1499 | 270.1448 |
| TPAG    | 299.1714 | 327.1663 | TPAGE  | 428.2140 | 456.2089 | TPAGEP | 525.2667 | 553.2617 |
| TPAGEPI | 638.3508 | 666.3457 | PA     | 141.1022 | 169.0972 | PAG    | 198.1237 | 226.1186 |
| PAGE    | 327.1663 | 355.1612 | PAGEP  | 424.2191 | 452.2140 | PAGEPI | 537.3031 | 565.2980 |
| PAGEPIP | 634.3559 | 662.3508 | AG     | 101.0709 | 129.0659 | AGE    | 230.1135 | 258.1084 |
| AGEP    | 327.1663 | 355.1612 | AGEPI  | 440.2504 | 468.2453 | AGEPIP | 537.3031 | 565.2980 |
| AGEPIPT | 638.3508 | 666.3457 | GE     | 159.0764 | 187.0713 | GEP    | 256.1292 | 284.1241 |
| GEPI    | 369.2132 | 397.2082 | GEPIP  | 466.2660 | 494.2609 | GEPIPT | 567.3137 | 595.3086 |
| GEPIPTN | 681.3566 | 709.3515 | EP     | 199.1077 | 227.1026 | EPI    | 312.1918 | 340.1867 |
| EPIP    | 409.2445 | 437.2395 | EPIPT  | 510.2922 | 538.2871 | EPIPTN | 624.3352 | 652.3301 |
| PI      | 183.1492 | 211.1441 | PIP    | 280.2020 | 308.1969 | PIPT   | 381.2496 | 409.2445 |
| PIPTN   | 495.2926 | 523.2875 | PIPTNK | 623.3875 | 651.3824 | IP     | 183.1492 | 211.1441 |
| IPT     | 284.1969 | 312.1918 | IPTN   | 398.2398 | 426.2347 | IPTNK  | 526.3348 | 554.3297 |
| PT      | 171.1128 | 199.1077 | PTN    | 285.1557 | 313.1506 | PTNK   | 413.2507 | 441.2456 |
| TN      | 188.1030 | 216.0979 | TNK    | 316.1979 | 344.1928 | NK     | 215.1503 | 243.1452 |

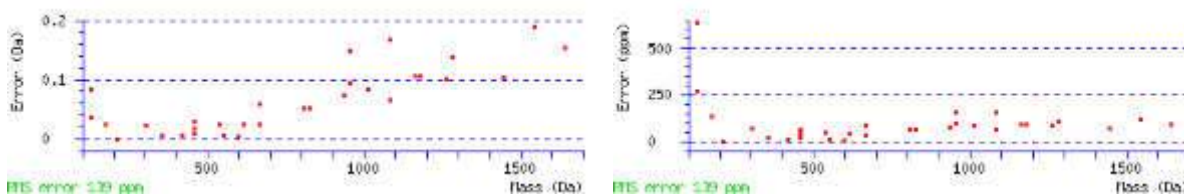

NCBI BLAST search of [GGNNILVMCDTYTPAGEPIPTNKR](#)  
 (Parameters: blastp, nr protein database, expect=20000, no filter, PAM30)

Other BLAST [web gateways](#)

All matches to this query

| Score | Mr(calc)  | Delta   | Sequence                                      |
|-------|-----------|---------|-----------------------------------------------|
| 66.3  | 2633.2578 | 0.0773  | <a href="#">GGNNILVMCDTYTPAGEPIPTNKR</a>      |
| 18.6  | 2633.3912 | -0.0561 | <a href="#">IELDISGSKFTNLSTQLLAALDER</a>      |
| 14.8  | 2633.4323 | -0.0972 | <a href="#">MAQQLLPASAAPSAPRAASVNVVLGSK</a>   |
| 14.7  | 2633.4575 | -0.1224 | <a href="#">ALGLDVVATGLAMSVGPAISALAGVPAGR</a> |
| 11.0  | 2633.3521 | -0.0171 | <a href="#">ALGLPSSVGOEARSIGODPAGVSPGGR</a>   |
| 9.8   | 2633.2863 | 0.0487  | <a href="#">GKPPKADPLLGD TAMQISTDIMMR</a>     |

|     |           |         |                                             |
|-----|-----------|---------|---------------------------------------------|
| 9.7 | 2633.3211 | 0.0139  | <a href="#">HAESFRHEPDQASLADIRPLGNR</a>     |
| 9.5 | 2633.4323 | -0.0973 | <a href="#">LPVSSIKGAIGHSLGAASAIEAAVCVR</a> |
| 8.4 | 2633.5852 | -0.2502 | <a href="#">MIVALAVAPVVLITLAIGLRGVAAMR</a>  |
| 8.2 | 2633.5052 | -0.1702 | <a href="#">KILPLFLTAMIFALVGCSNIATK</a>     |

Mascot: <http://www.matrixscience.com/>


**Mascot Search Results**
**Peptide View Spot no 69**

 MS/MS Fragmentation of **DVNWPLGWVGGYPGPGPYCAVGS DK**

 Found in **gi19387272** in **NCBI**nr, putative precursor chloroplastic glutamine synthetase [*Oryza sativa Japonica Group*]

Match to Query 240: 3035.488824 from(3036.496100,1+) intensity(0.0000) index(32)

Title: Label: B19, Spot\_Id: 219963, Peak\_List\_Id: 229184, MSMS Job\_Run\_Id: 22013, Comment:

Data file C:\Documents and Settings\Administrator\Desktop\Farah-Garima 11May 2013\ppw\_B19\_136868333300.txt

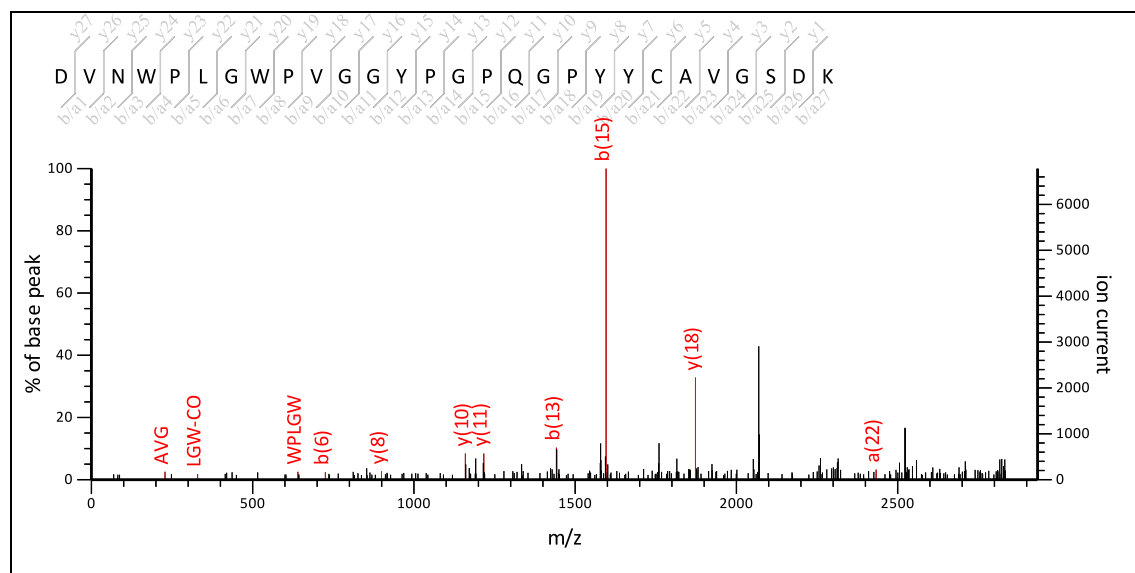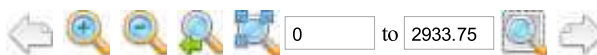
 Label all possible matches  Label matches used for scoring 

Monoisotopic mass of neutral peptide Mr(calc): 3035.3913

Fixed modifications: Carbamidomethyl (C) (apply to specified residues or termini only)

Ions Score: 11 Expect: 1.1e+03

 Matches : 13/554 fragment ions using 28 most intense peaks ([help](#))

| #  | Immon.   | a         | a*        | a <sup>0</sup> | b                | b*        | b <sup>0</sup> | d         | Seq. | v         | w         | y                | y*        | y <sup>0</sup> | #  |
|----|----------|-----------|-----------|----------------|------------------|-----------|----------------|-----------|------|-----------|-----------|------------------|-----------|----------------|----|
| 1  | 88.0393  | 88.0393   |           | 70.0287        | 116.0342         |           | 98.0237        | 44.0495   | D    |           |           |                  |           |                | 28 |
| 2  | 72.0808  | 187.1077  |           | 169.0972       | 215.1026         |           | 197.0921       | 173.0921  | V    | 2877.3090 | 2890.3294 | 2921.3716        | 2904.3450 | 2903.3610      | 27 |
| 3  | 87.0553  | 301.1506  | 284.1241  | 283.1401       | <b>329.1456</b>  | 312.1190  | 311.1350       | 258.1448  | N    | 2763.2660 | 2762.2708 | 2822.3032        | 2805.2766 | 2804.2926      | 26 |
| 4  | 159.0917 | 487.2300  | 470.2034  | 469.2194       | 515.2249         | 498.1983  | 497.2143       |           | W    | 2577.1867 |           | 2708.2602        | 2691.2337 | 2690.2497      | 25 |
| 5  | 70.0651  | 584.2827  | 567.2562  | 566.2722       | 612.2776         | 595.2511  | 594.2671       | 558.2671  | P    | 2480.1340 | 2479.1387 | 2522.1809        | 2505.1544 | 2504.1703      | 24 |
| 6  | 86.0964  | 697.3668  | 680.3402  | 679.3562       | <b>725.3617</b>  | 708.3352  | 707.3511       | 655.3198  | L    | 2367.0499 | 2366.0546 | 2425.1281        | 2408.1016 | 2407.1176      | 23 |
| 7  | 30.0338  | 754.3883  | 737.3617  | 736.3777       | 782.3832         | 765.3566  | 764.3726       |           | G    |           |           | 2312.0441        | 2295.0175 | 2294.0335      | 22 |
| 8  | 159.0917 | 940.4676  | 923.4410  | 922.4570       | 968.4625         | 951.4359  | 950.4519       |           | W    | 2123.9491 |           | 2255.0226        | 2237.9961 | 2237.0121      | 21 |
| 9  | 70.0651  | 1037.5203 | 1020.4938 | 1019.5098      | 1065.5152        | 1048.4887 | 1047.5047      | 1011.5047 | P    | 2026.8964 | 2025.9011 | 2068.9433        | 2051.9168 | 2050.9327      | 20 |
| 10 | 72.0808  | 1136.5887 | 1119.5622 | 1118.5782      | 1164.5837        | 1147.5571 | 1146.5731      | 1122.5731 | V    | 1927.8279 | 1940.8483 | 1971.8905        | 1954.8640 | 1953.8800      | 19 |
| 11 | 30.0338  | 1193.6102 | 1176.5837 | 1175.5996      | 1221.6051        | 1204.5786 | 1203.5946      |           | G    |           |           | <b>1872.8221</b> | 1855.7956 | 1854.8116      | 18 |
| 12 | 30.0338  | 1250.6317 | 1233.6051 | 1232.6211      | 1278.6266        | 1261.6000 | 1260.6160      |           | G    |           |           | 1815.8007        | 1798.7741 | 1797.7901      | 17 |
| 13 | 136.0757 | 1413.6950 | 1396.6684 | 1395.6844      | <b>1441.6899</b> | 1424.6634 | 1423.6793      |           | Y    | 1650.7217 |           | 1758.7792        | 1741.7527 | 1740.7686      | 16 |
| 14 | 70.0651  | 1510.7478 | 1493.7212 | 1492.7372      | 1538.7427        | 1521.7161 | 1520.7321      | 1484.7321 | P    | 1553.6689 | 1552.6737 | <b>1595.7159</b> | 1578.6893 | 1577.7053      | 15 |
| 15 | 30.0338  | 1567.7692 | 1550.7427 | 1549.7587      | <b>1595.7641</b> | 1578.7376 | 1577.7536      |           | G    |           |           | 1498.6631        | 1481.6366 | 1480.6525      | 14 |
| 16 | 70.0651  | 1664.8220 | 1647.7954 | 1646.8114      | 1692.8169        | 1675.7904 | 1674.8063      | 1638.8063 | P    | 1399.5947 | 1398.5994 | 1441.6416        | 1424.6151 | 1423.6311      | 13 |
| 17 | 101.0709 | 1792.8806 | 1775.8540 | 1774.8700      | 1820.8755        | 1803.8489 | 1802.8649      | 1735.8591 | Q    | 1271.5361 | 1270.5409 | 1344.5889        | 1327.5623 | 1326.5783      | 12 |
| 18 | 30.0338  | 1849.9020 | 1832.8755 | 1831.8915      | 1877.8969        | 1860.8704 | 1859.8864      |           | G    |           |           | <b>1216.5303</b> | 1199.5038 | 1198.5197      | 11 |
| 19 | 70.0651  | 1946.9548 | 1929.9282 | 1928.9442      | 1974.9497        | 1957.9232 | 1956.9391      | 1920.9391 | P    | 1117.4619 | 1116.4666 | <b>1159.5088</b> | 1142.4823 | 1141.4983      | 10 |



|    |          |           |           |           |           |           |           |           |   |          |          |           |           |           |   |
|----|----------|-----------|-----------|-----------|-----------|-----------|-----------|-----------|---|----------|----------|-----------|-----------|-----------|---|
| 20 | 136.0757 | 2110.0181 | 2092.9916 | 2092.0076 | 2138.0130 | 2120.9865 | 2120.0025 |           | Y | 954.3986 |          | 1062.4561 | 1045.4295 | 1044.4455 | 9 |
| 21 | 136.0757 | 2273.0815 | 2256.0549 | 2255.0709 | 2301.0764 | 2284.0498 | 2283.0658 |           | Y | 791.3352 |          | 899.3927  | 882.3662  | 881.3822  | 8 |
| 22 | 133.0430 | 2433.1121 | 2416.0856 | 2415.1015 | 2461.1070 | 2444.0805 | 2443.0965 | 2344.1186 | C | 631.3046 | 630.3093 | 736.3294  | 719.3029  | 718.3189  | 7 |
| 23 | 44.0495  | 2504.1492 | 2487.1227 | 2486.1387 | 2532.1441 | 2515.1176 | 2514.1336 |           | A | 560.2675 |          | 576.2988  | 559.2722  | 558.2882  | 6 |
| 24 | 72.0808  | 2603.2176 | 2586.1911 | 2585.2071 | 2631.2125 | 2614.1860 | 2613.2020 | 2589.2020 | V | 461.1991 | 474.2195 | 505.2617  | 488.2351  | 487.2511  | 5 |
| 25 | 30.0338  | 2660.2391 | 2643.2125 | 2642.2285 | 2688.2340 | 2671.2075 | 2670.2234 |           | G |          |          | 406.1932  | 389.1667  | 388.1827  | 4 |
| 26 | 60.0444  | 2747.2711 | 2730.2446 | 2729.2606 | 2775.2660 | 2758.2395 | 2757.2555 | 2731.2762 | S | 317.1456 | 316.1503 | 349.1718  | 332.1452  | 331.1612  | 3 |
| 27 | 88.0393  | 2862.2981 | 2845.2715 | 2844.2875 | 2890.2930 | 2873.2664 | 2872.2824 | 2818.3082 | D | 202.1186 | 201.1234 | 262.1397  | 245.1132  | 244.1292  | 2 |
| 28 | 101.1073 |           |           |           |           |           |           |           | K | 74.0237  | 73.0284  | 147.1128  | 130.0863  |           | 1 |

| Seq      | ya       | yb       | Seq      | ya       | yb       | Seq     | ya       | yb       |
|----------|----------|----------|----------|----------|----------|---------|----------|----------|
| VN       | 186.1237 | 214.1186 | VNW      | 372.2030 | 400.1979 | VNWP    | 469.2558 | 497.2507 |
| VNWPL    | 582.3398 | 610.3348 | VNWPLG   | 639.3613 | 667.3562 | NW      | 273.1346 | 301.1295 |
| NWP      | 370.1874 | 398.1823 | NWPL     | 483.2714 | 511.2663 | NWPLG   | 540.2929 | 568.2878 |
| WP       | 256.1444 | 284.1394 | WPL      | 369.2285 | 397.2234 | WPLG    | 426.2500 | 454.2449 |
| WPLGW    | 612.3293 | 640.3242 | PL       | 183.1492 | 211.1441 | PLG     | 240.1707 | 268.1656 |
| PLGW     | 426.2500 | 454.2449 | PLGWP    | 523.3027 | 551.2976 | PLGWPV  | 622.3711 | 650.3661 |
| PLGWVPG  | 679.3926 | 707.3875 | LG       | 143.1179 | 171.1128 | LGW     | 329.1972 | 357.1921 |
| LGWP     | 426.2500 | 454.2449 | LGWPV    | 525.3184 | 553.3133 | LGWVPG  | 582.3398 | 610.3348 |
| LGWVGG   | 639.3613 | 667.3562 | GW       | 216.1131 | 244.1081 | GWP     | 313.1659 | 341.1608 |
| GWPV     | 412.2343 | 440.2292 | GWPVG    | 469.2558 | 497.2507 | GWPVGG  | 526.2772 | 554.2722 |
| GWPVGGY  | 689.3406 | 717.3355 | WP       | 256.1444 | 284.1394 | WPV     | 355.2129 | 383.2078 |
| WPVG     | 412.2343 | 440.2292 | WPVGG    | 469.2558 | 497.2507 | WPVGGY  | 632.3191 | 660.3140 |
| PV       | 169.1335 | 197.1285 | PVG      | 226.1550 | 254.1499 | PVGG    | 283.1765 | 311.1714 |
| PVGGY    | 446.2398 | 474.2347 | PVGGYP   | 543.2926 | 571.2875 | PVGGYPG | 600.3140 | 628.3089 |
| PVGGYPGP | 697.3668 | 725.3617 | VG       | 129.1022 | 157.0972 | VGG     | 186.1237 | 214.1186 |
| VGGY     | 349.1870 | 377.1819 | VGGYP    | 446.2398 | 474.2347 | VGGYPG  | 503.2613 | 531.2562 |
| VGGYPGP  | 600.3140 | 628.3089 | GG       | 87.0553  | 115.0502 | GGY     | 250.1186 | 278.1135 |
| GGYP     | 347.1714 | 375.1663 | GGYPG    | 404.1928 | 432.1878 | GGYPGP  | 501.2456 | 529.2405 |
| GGYPGPQ  | 629.3042 | 657.2991 | GGYPGPQG | 686.3257 | 714.3206 | GY      | 193.0972 | 221.0921 |
| GYP      | 290.1499 | 318.1448 | GYPG     | 347.1714 | 375.1663 | GYPGP   | 444.2241 | 472.2191 |
| GYPGPQ   | 572.2827 | 600.2776 | GYPGPQG  | 629.3042 | 657.2991 | YP      | 233.1285 | 261.1234 |
| YPG      | 290.1499 | 318.1448 | YPGP     | 387.2027 | 415.1976 | YPGPQ   | 515.2613 | 543.2562 |
| YPGPQG   | 572.2827 | 600.2776 | YPGPQGP  | 669.3355 | 697.3304 | PG      | 127.0866 | 155.0815 |
| PGP      | 224.1394 | 252.1343 | PGPQ     | 352.1979 | 380.1928 | PGPQG   | 409.2194 | 437.2143 |
| PGPQGP   | 506.2722 | 534.2671 | PGPQGPY  | 669.3355 | 697.3304 | GP      | 127.0866 | 155.0815 |
| GPQ      | 255.1452 | 283.1401 | GPQG     | 312.1666 | 340.1615 | GPQGP   | 409.2194 | 437.2143 |
| GPQGPY   | 572.2827 | 600.2776 | PQ       | 198.1237 | 226.1186 | PQG     | 255.1452 | 283.1401 |
| PQGP     | 352.1979 | 380.1928 | PQGPY    | 515.2613 | 543.2562 | PQGPYY  | 678.3246 | 706.3195 |
| QG       | 158.0924 | 186.0873 | QGP      | 255.1452 | 283.1401 | QGPY    | 418.2085 | 446.2034 |
| QGPYY    | 581.2718 | 609.2667 | GP       | 127.0866 | 155.0815 | GPY     | 290.1499 | 318.1448 |
| GPYY     | 453.2132 | 481.2082 | GPYYC    | 613.2439 | 641.2388 | GPYYCA  | 684.2810 | 712.2759 |
| PY       | 233.1285 | 261.1234 | PYY      | 396.1918 | 424.1867 | PYYC    | 556.2224 | 584.2173 |
| PYYCA    | 627.2595 | 655.2545 | YY       | 299.1390 | 327.1339 | YYC     | 459.1697 | 487.1646 |
| YYCA     | 530.2068 | 558.2017 | YYCAV    | 629.2752 | 657.2701 | YYCAVG  | 686.2967 | 714.2916 |
| YC       | 296.1063 | 324.1013 | YCA      | 367.1435 | 395.1384 | YCAV    | 466.2119 | 494.2068 |
| YCAVG    | 523.2333 | 551.2282 | YCAVGS   | 610.2654 | 638.2603 | CA      | 204.0801 | 232.0750 |
| CAV      | 303.1485 | 331.1435 | CAVG     | 360.1700 | 388.1649 | CAVGS   | 447.2020 | 475.1969 |
| CAVGS    | 562.2290 | 590.2239 | AV       | 143.1179 | 171.1128 | AVG     | 200.1394 | 228.1343 |
| AVGS     | 287.1714 | 315.1663 | AVGS     | 402.1983 | 430.1932 | VG      | 129.1022 | 157.0972 |
| VGS      | 216.1343 | 244.1292 | VGSD     | 331.1612 | 359.1561 | GS      | 117.0659 | 145.0608 |
| GSD      | 232.0928 | 260.0877 | SD       | 175.0713 | 203.0662 |         |          |          |

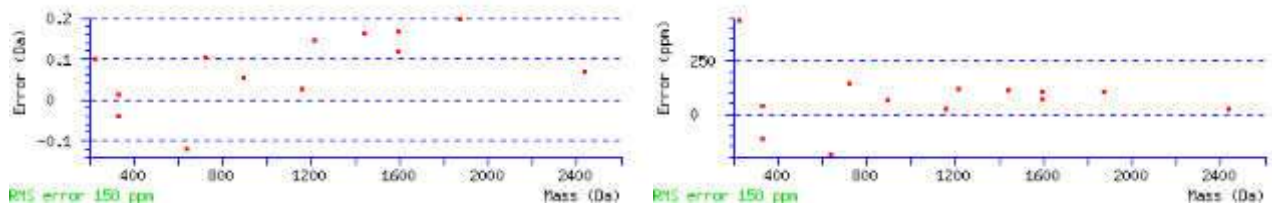

NCBI BLAST search of [DVNWPLGWPVGGYPGPOGPYYCAVGSDK](#)

(Parameters: blastp, nr protein database, expect=20000, no filter, PAM30)

Other BLAST [web gateways](#)

#### All matches to this query

| Score | Mr(calc)  | Delta  | Sequence                                     |
|-------|-----------|--------|----------------------------------------------|
| 11.3  | 3035.3913 | 0.0976 | <a href="#">DVNWPLGWPVGGYPGPOGPYYCAVGSDK</a> |

Mascot: <http://www.matrixscience.com/>



# Mascot Search Results

## Peptide View **Spot no 71**

MS/MS Fragmentation of **IVVFLNKK**

Found in **gi|6525065** in **NCBI nr**, chloroplast translational elongation factor Tu [Oryza sativa Japonica Group]

Match to Query 8: 959.596854 from(960.604130,1+) intensity(0.0000) index(3)

Title: Label: B3, Spot\_Id: 219707, Peak\_List\_Id: 225190, MSMS Job\_Run\_Id: 21768, Comment:

Data file C:\Documents and Settings\Administrator\Desktop\farah BHU\spot set plate\Farah-Garima 11May 2013\ppw\_B3\_136842116600.txt

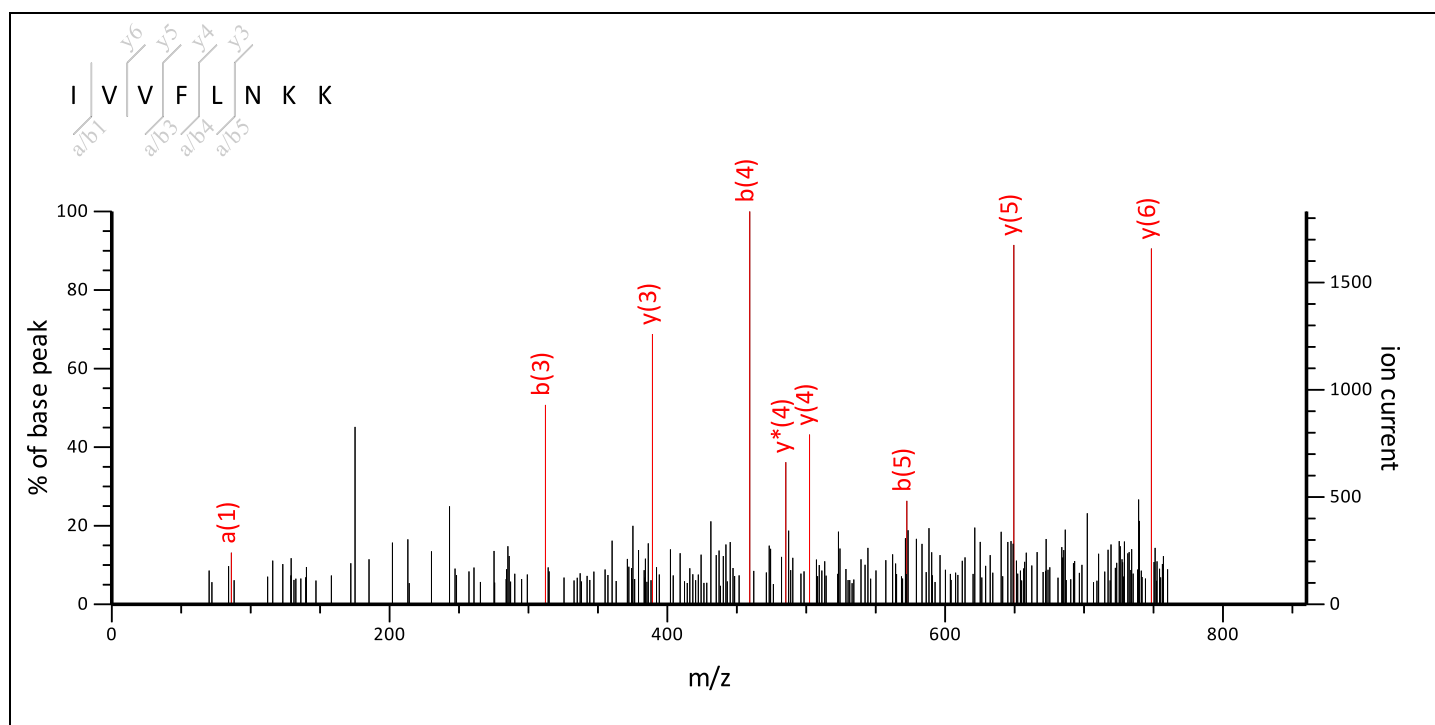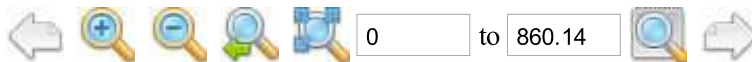

Label all possible matches  Label matches used for scoring

**Monoisotopic mass of neutral peptide Mr(calc):** 959.6168

**Fixed modifications:** Carbamidomethyl (C) (apply to specified residues or termini only)

**Ions Score:** 24 **Expect:** 5.7

**Matches:** 9/32 fragment ions using 14 most intense peaks ([help](#))

| # | a              | a*       | b               | b*       | Seq.     | y               | y*              | #        |
|---|----------------|----------|-----------------|----------|----------|-----------------|-----------------|----------|
| 1 | <b>86.0964</b> |          | 114.0913        |          | <b>I</b> |                 |                 | <b>8</b> |
| 2 | 185.1648       |          | 213.1598        |          | <b>V</b> | 847.5400        | 830.5135        | <b>7</b> |
| 3 | 284.2333       |          | <b>312.2282</b> |          | <b>V</b> | <b>748.4716</b> | 731.4450        | <b>6</b> |
| 4 | 431.3017       |          | <b>459.2966</b> |          | <b>F</b> | <b>649.4032</b> | 632.3766        | <b>5</b> |
| 5 | 544.3857       |          | <b>572.3806</b> |          | <b>L</b> | <b>502.3348</b> | <b>485.3082</b> | <b>4</b> |
| 6 | 658.4287       | 641.4021 | 686.4236        | 669.3970 | <b>N</b> | <b>389.2507</b> | 372.2241        | <b>3</b> |
| 7 | 786.5236       | 769.4971 | 814.5185        | 797.4920 | <b>K</b> | 275.2078        | 258.1812        | <b>2</b> |
| 8 |                |          |                 |          | <b>K</b> | 147.1128        | 130.0863        | <b>1</b> |

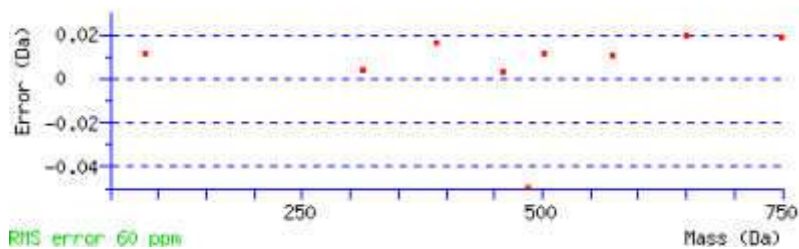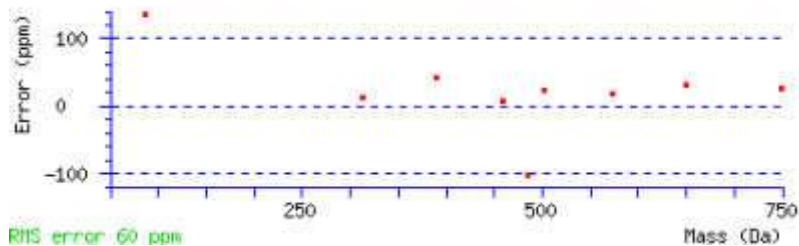

NCBI **BLAST** search of [IVVFLNKK](#)

(Parameters: blastp, nr protein database, expect=20000, no filter, PAM30)

Other BLAST [web gateways](#)

#### All matches to this query

| Score | Mr(calc) | Delta   | Sequence                 |
|-------|----------|---------|--------------------------|
| 36.9  | 959.5804 | 0.0164  | <a href="#">LVVFLVDR</a> |
| 32.1  | 959.5804 | 0.0164  | <a href="#">VIVFDLVR</a> |
| 32.1  | 959.5341 | 0.0627  | <a href="#">VLAFAFHR</a> |
| 24.2  | 959.6168 | -0.0199 | <a href="#">IVVFLNKK</a> |
| 23.8  | 959.5341 | 0.0627  | <a href="#">LQFLFHR</a>  |
| 23.8  | 959.5110 | 0.0859  | <a href="#">LTPMLVDR</a> |
| 21.8  | 959.5188 | 0.0780  | <a href="#">SSHFIKKN</a> |
| 21.6  | 959.5341 | 0.0627  | <a href="#">IGAFIFHR</a> |
| 20.1  | 959.5705 | 0.0264  | <a href="#">IFLKFHR</a>  |
| 20.1  | 959.5341 | 0.0627  | <a href="#">IFLQFHR</a>  |

Mascot: <http://www.matrixscience.com/>

# MATRIX SCIENCE Mascot Search Results

## Peptide View **Spot no 71**

### MS/MS Fragmentation of **VGDTVDIVGIR**

Found in **gi|6525065** in **NCBIInr**, chloroplast translational elongation factor Tu [*Oryza sativa* Japonica Group]

Match to Query 22: 1142.627224 from(1143.634500,1+) intensity(0.0000) index(9)

Title: Label: B3, Spot\_Id: 219707, Peak\_List\_Id: 225183, MSMS Job\_Run\_Id: 21768, Comment:

Data file C:\Documents and Settings\Administrator\Desktop\farah BHU\spot set plate\Farah-Garima 11May 2013\ppw\_B3\_136842116600.txt

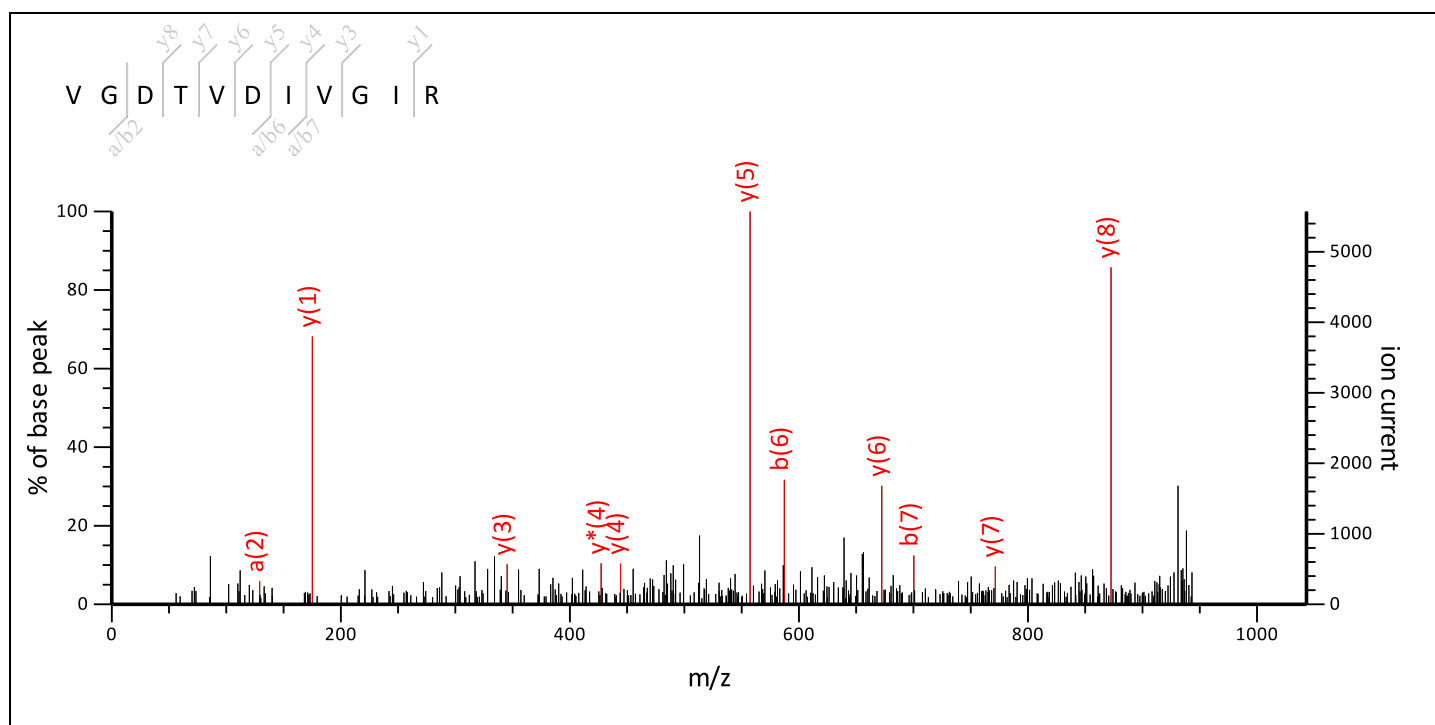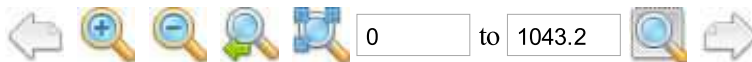

Label all possible matches  Label matches used for scoring

**Monoisotopic mass of neutral peptide Mr(calc):** 1142.6296

**Fixed modifications:** Carbamidomethyl (C) (apply to specified residues or termini only)

**Ions Score:** 37 **Expect:** 0.48

**Matches:** 15/40 fragment ions using 27 most intense peaks ([help](#))

| # | a               | b               | Seq. | y               | y*              | #  |
|---|-----------------|-----------------|------|-----------------|-----------------|----|
| 1 | 72.0808         | 100.0757        | V    |                 |                 | 11 |
| 2 | <b>129.1022</b> | 157.0972        | G    | 1044.5684       | 1027.5419       | 10 |
| 3 | 244.1292        | 272.1241        | D    | 987.5469        | 970.5204        | 9  |
| 4 | <b>345.1769</b> | 373.1718        | T    | <b>872.5200</b> | 855.4934        | 8  |
| 5 | <b>444.2453</b> | 472.2402        | V    | <b>771.4723</b> | 754.4458        | 7  |
| 6 | 559.2722        | <b>587.2671</b> | D    | <b>672.4039</b> | 655.3774        | 6  |
| 7 | <b>672.3563</b> | <b>700.3512</b> | I    | <b>557.3770</b> | 540.3504        | 5  |
| 8 | <b>771.4247</b> | 799.4196        | V    | <b>444.2929</b> | <b>427.2663</b> | 4  |

|    |          |          |   |                 |          |   |
|----|----------|----------|---|-----------------|----------|---|
| 9  | 828.4462 | 856.4411 | G | <b>345.2245</b> | 328.1979 | 3 |
| 10 | 941.5302 | 969.5251 | I | 288.2030        | 271.1765 | 2 |
| 11 |          |          | R | <b>175.1190</b> | 158.0924 | 1 |

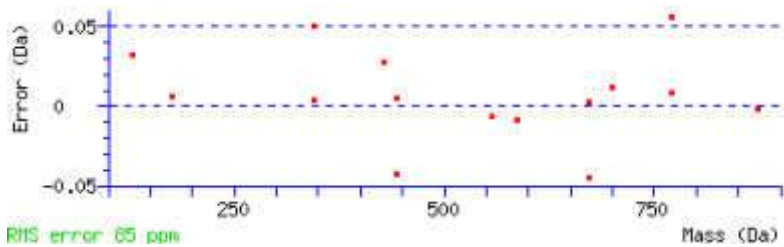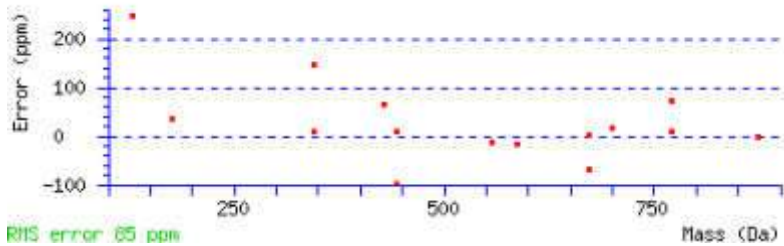

NCBI BLAST search of [VGDTV DIVGIR](#)

(Parameters: blastp, nr protein database, expect=20000, no filter, PAM30)

Other BLAST [web gateways](#)

#### All matches to this query

| Score | Mr(calc)  | Delta   | Sequence                     |
|-------|-----------|---------|------------------------------|
| 36.5  | 1142.6296 | -0.0023 | <a href="#">VGDTV DIVGIR</a> |
| 26.8  | 1142.6084 | 0.0188  | <a href="#">WADDVLVGIR</a>   |
| 24.6  | 1142.6044 | 0.0228  | <a href="#">DRTVLDPATR</a>   |
| 20.4  | 1142.6408 | -0.0135 | <a href="#">SVEGV DLLRR</a>  |
| 18.6  | 1142.6118 | 0.0155  | <a href="#">LGAMIVDPATR</a>  |
| 18.6  | 1142.6659 | -0.0387 | <a href="#">LGLSESLVGR</a>   |
| 18.6  | 1142.6746 | -0.0474 | <a href="#">LWMRLVGLR</a>    |
| 18.5  | 1142.6659 | -0.0387 | <a href="#">KISDLVDVVR</a>   |
| 18.5  | 1142.6295 | -0.0023 | <a href="#">SSPAITLTPR</a>   |
| 18.4  | 1142.6156 | 0.0116  | <a href="#">RSADGAAVGLR</a>  |

Mascot: <http://www.matrixscience.com/>

# MATRIX SCIENCE Mascot Search Results

## Peptide View **Spot no 71**

MS/MS Fragmentation of **ALENLMANPAIK**

Found in **gi|6525065** in **NCBIInr**, chloroplast translational elongation factor Tu [*Oryza sativa* Japonica Group]

Match to Query 27: 1299.653824 from(1300.661100,1+) intensity(0.0000) index(11)

Title: Label: B3, Spot\_Id: 219707, Peak\_List\_Id: 225185, MSMS Job\_Run\_Id: 21768, Comment:

Data file C:\Documents and Settings\Administrator\Desktop\farah BHU\spot set plate\Farah-Garima 11May 2013\ppw\_B3\_136842116600.txt

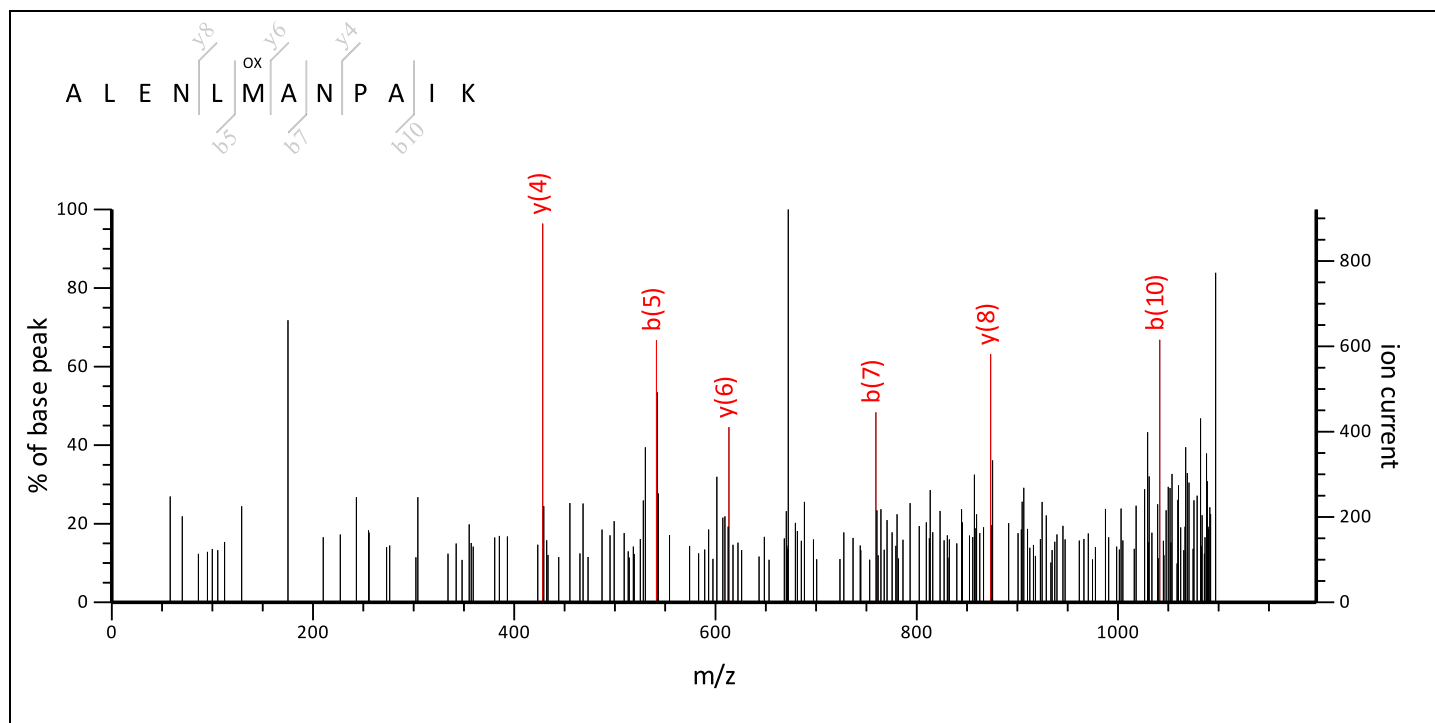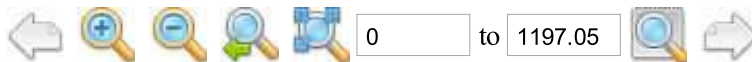

Label all possible matches  Label matches used for scoring

**Monoisotopic mass of neutral peptide Mr(calc):** 1299.6856

**Fixed modifications:** Carbamidomethyl (C) (apply to specified residues or termini only)

**Variable modifications:**

**M6** : Oxidation (M), with neutral losses 0.0000 (shown in table), 63.9983

**Ions Score:** 25 **Expect:** 6.5

**Matches** : 8/94 fragment ions using 11 most intense peaks ([help](#))

| # | a        | a*       | b               | b*       | Seq. | y               | y*        | #  |
|---|----------|----------|-----------------|----------|------|-----------------|-----------|----|
| 1 | 44.0495  |          | 72.0444         |          | A    |                 |           | 12 |
| 2 | 157.1335 |          | 185.1285        |          | L    | 1229.6558       | 1212.6293 | 11 |
| 3 | 286.1761 |          | 314.1710        |          | E    | 1116.5718       | 1099.5452 | 10 |
| 4 | 400.2191 | 383.1925 | <b>428.2140</b> | 411.1874 | N    | 987.5292        | 970.5026  | 9  |
| 5 | 513.3031 | 496.2766 | <b>541.2980</b> | 524.2715 | L    | <b>873.4863</b> | 856.4597  | 8  |
| 6 | 660.3385 | 643.3120 | 688.3334        | 671.3069 | M    | 760.4022        | 743.3756  | 7  |



|    |           |           |                  |           |   |                 |          |   |
|----|-----------|-----------|------------------|-----------|---|-----------------|----------|---|
| 7  | 731.3756  | 714.3491  | <b>759.3706</b>  | 742.3440  | A | <b>613.3668</b> | 596.3402 | 6 |
| 8  | 845.4186  | 828.3920  | <b>873.4135</b>  | 856.3869  | N | 542.3297        | 525.3031 | 5 |
| 9  | 942.4713  | 925.4448  | 970.4662         | 953.4397  | P | <b>428.2867</b> | 411.2602 | 4 |
| 10 | 1013.5084 | 996.4819  | <b>1041.5034</b> | 1024.4768 | A | 331.2340        | 314.2074 | 3 |
| 11 | 1126.5925 | 1109.5660 | 1154.5874        | 1137.5609 | I | 260.1969        | 243.1703 | 2 |
| 12 |           |           |                  |           | K | 147.1128        | 130.0863 | 1 |

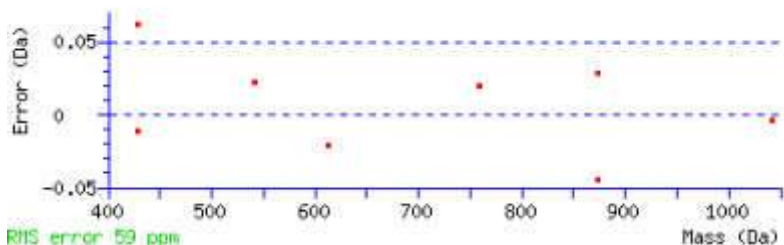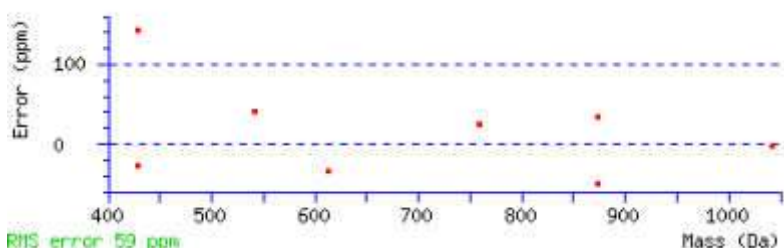

NCBI BLAST search of [ALENLMANPAIK](#)

(Parameters: blastp, nr protein database, expect=20000, no filter, PAM30)

Other BLAST [web gateways](#)

#### All matches to this query

| Score | Mr(calc)  | Delta   | Sequence                      |
|-------|-----------|---------|-------------------------------|
| 25.4  | 1299.6856 | -0.0318 | <a href="#">ALENLMANPAIK</a>  |
| 21.4  | 1299.6354 | 0.0184  | <a href="#">GAGEKVCGNGVPR</a> |
| 15.7  | 1299.6895 | -0.0357 | <a href="#">RASVAGASSPLER</a> |
| 15.5  | 1299.6782 | -0.0244 | <a href="#">LQGENSAEIIAR</a>  |
| 14.9  | 1299.6870 | -0.0332 | <a href="#">GGPGIACFIPRR</a>  |
| 14.8  | 1299.7220 | -0.0682 | <a href="#">KAIDLMQPQIK</a>   |
| 14.8  | 1299.7220 | -0.0682 | <a href="#">KALDLMQPQIK</a>   |
| 14.8  | 1299.6857 | -0.0318 | <a href="#">QALDLMQPQIK</a>   |
| 14.1  | 1299.7663 | -0.1124 | <a href="#">KLWNSLSLLAR</a>   |
| 14.1  | 1299.7048 | -0.0509 | <a href="#">NLVTNSPPFRR</a>   |

Mascot: <http://www.matrixscience.com/>

# MATRIX SCIENCE Mascot Search Results

## Peptide View **Spot no 71**

### MS/MS Fragmentation of **KYDEIDAAPEER**

Found in **gi|6525065** in **NCBIInr**, chloroplast translational elongation factor Tu [Oryza sativa Japonica Group]

Match to Query 34: 1434.649024 from(1435.656300,1+) intensity(0.0000) index(14)

Title: Label: B3, Spot\_Id: 219707, Peak\_List\_Id: 225168, MSMS Job\_Run\_Id: 21768, Comment:

Data file C:\Documents and Settings\Administrator\Desktop\farah BHU\spot set plate\Farah-Garima 11May 2013\ppw\_B3\_136842116600.txt

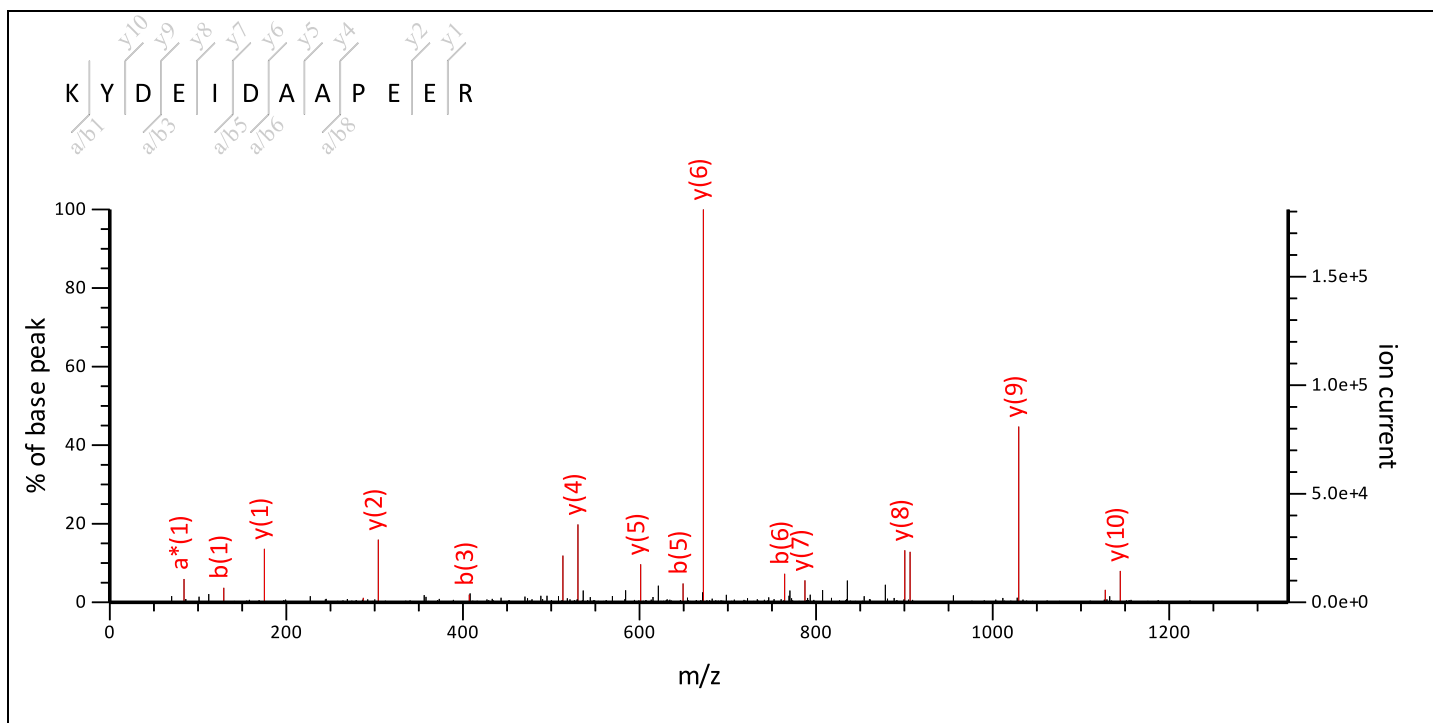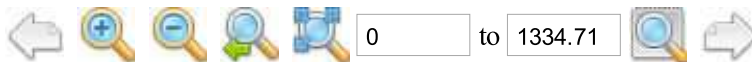

Label all possible matches  Label matches used for scoring

**Monoisotopic mass of neutral peptide Mr(calc):** 1434.6626

**Fixed modifications:** Carbamidomethyl (C) (apply to specified residues or termini only)

**Ions Score:** 76 **Expect:** 5e-05

**Matches :** 18/66 fragment ions using 24 most intense peaks ([help](#))

| # | a        | a*       | b        | b*       | Seq. | y         | y*        | #  |
|---|----------|----------|----------|----------|------|-----------|-----------|----|
| 1 | 101.1073 | 84.0808  | 129.1022 | 112.0757 | K    |           |           | 12 |
| 2 | 264.1707 | 247.1441 | 292.1656 | 275.1390 | Y    | 1307.5750 | 1290.5485 | 11 |
| 3 | 379.1976 | 362.1710 | 407.1925 | 390.1660 | D    | 1144.5117 | 1127.4851 | 10 |
| 4 | 508.2402 | 491.2136 | 536.2351 | 519.2086 | E    | 1029.4847 | 1012.4582 | 9  |
| 5 | 621.3243 | 604.2977 | 649.3192 | 632.2926 | I    | 900.4421  | 883.4156  | 8  |
| 6 | 736.3512 | 719.3246 | 764.3461 | 747.3196 | D    | 787.3581  | 770.3315  | 7  |
| 7 | 807.3883 | 790.3618 | 835.3832 | 818.3567 | A    | 672.3311  | 655.3046  | 6  |
| 8 | 878.4254 | 861.3989 | 906.4203 | 889.3938 | A    | 601.2940  | 584.2675  | 5  |

|    |           |           |           |           |   |                 |                 |   |
|----|-----------|-----------|-----------|-----------|---|-----------------|-----------------|---|
| 9  | 975.4782  | 958.4516  | 1003.4731 | 986.4466  | P | <b>530.2569</b> | <b>513.2304</b> | 4 |
| 10 | 1104.5208 | 1087.4942 | 1132.5157 | 1115.4891 | E | 433.2041        | 416.1776        | 3 |
| 11 | 1233.5634 | 1216.5368 | 1261.5583 | 1244.5317 | E | <b>304.1615</b> | <b>287.1350</b> | 2 |
| 12 |           |           |           |           | R | <b>175.1190</b> | 158.0924        | 1 |

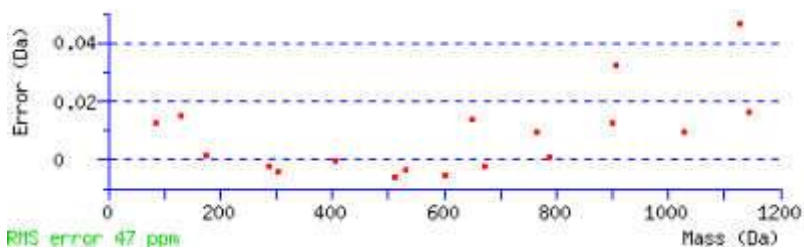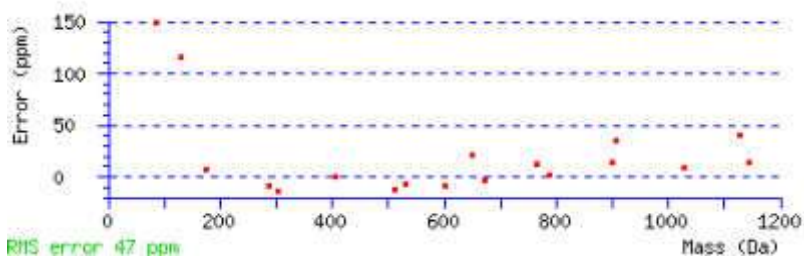

NCBI **BLAST** search of [KYDEIDAAPEER](#)

(Parameters: blastp, nr protein database, expect=20000, no filter, PAM30)

Other BLAST [web gateways](#)

#### All matches to this query

| Score | Mr(calc)  | Delta   | Sequence                      |
|-------|-----------|---------|-------------------------------|
| 75.7  | 1434.6626 | -0.0136 | <a href="#">KYDEIDAAPEER</a>  |
| 27.4  | 1434.7541 | -0.1050 | <a href="#">YMTGPTLAALIER</a> |
| 24.9  | 1434.6626 | -0.0136 | <a href="#">RYDEIDAAPEEK</a>  |
| 17.4  | 1434.6966 | -0.0475 | <a href="#">WGYEMPVDVLAR</a>  |
| 17.2  | 1434.6739 | -0.0249 | <a href="#">ENAKSAGFTPEER</a> |
| 17.0  | 1434.7354 | -0.0864 | <a href="#">QEDSIVFSLIER</a>  |
| 16.6  | 1434.6462 | 0.0028  | <a href="#">HMSYHYALQNR</a>   |
| 14.3  | 1434.6991 | -0.0500 | <a href="#">GVSYEDPSVQLNK</a> |
| 13.7  | 1434.6661 | -0.0170 | <a href="#">TMVDSSVVEEAPR</a> |
| 11.8  | 1434.6959 | -0.0469 | <a href="#">VKDEVCMGNVIR</a>  |

Mascot: <http://www.matrixscience.com/>

# MATRIX SCIENCE Mascot Search Results

## Peptide View **Spot no 71**

### MS/MS Fragmentation of **VGDTV DIVGIRETR**

Found in **gi|6525065** in **NCBI nr**, chloroplast translational elongation factor Tu [*Oryza sativa* Japonica Group]

Match to Query 40: 1528.806224 from(1529.813500,1+) intensity(0.0000) index(16)

Title: Label: B3, Spot\_Id: 219707, Peak\_List\_Id: 225172, MSMS Job\_Run\_Id: 21768, Comment:

Data file C:\Documents and Settings\Administrator\Desktop\farah BHU\spot set plate\Farah-Garima 11May 2013\ppw\_B3\_136842116600.txt

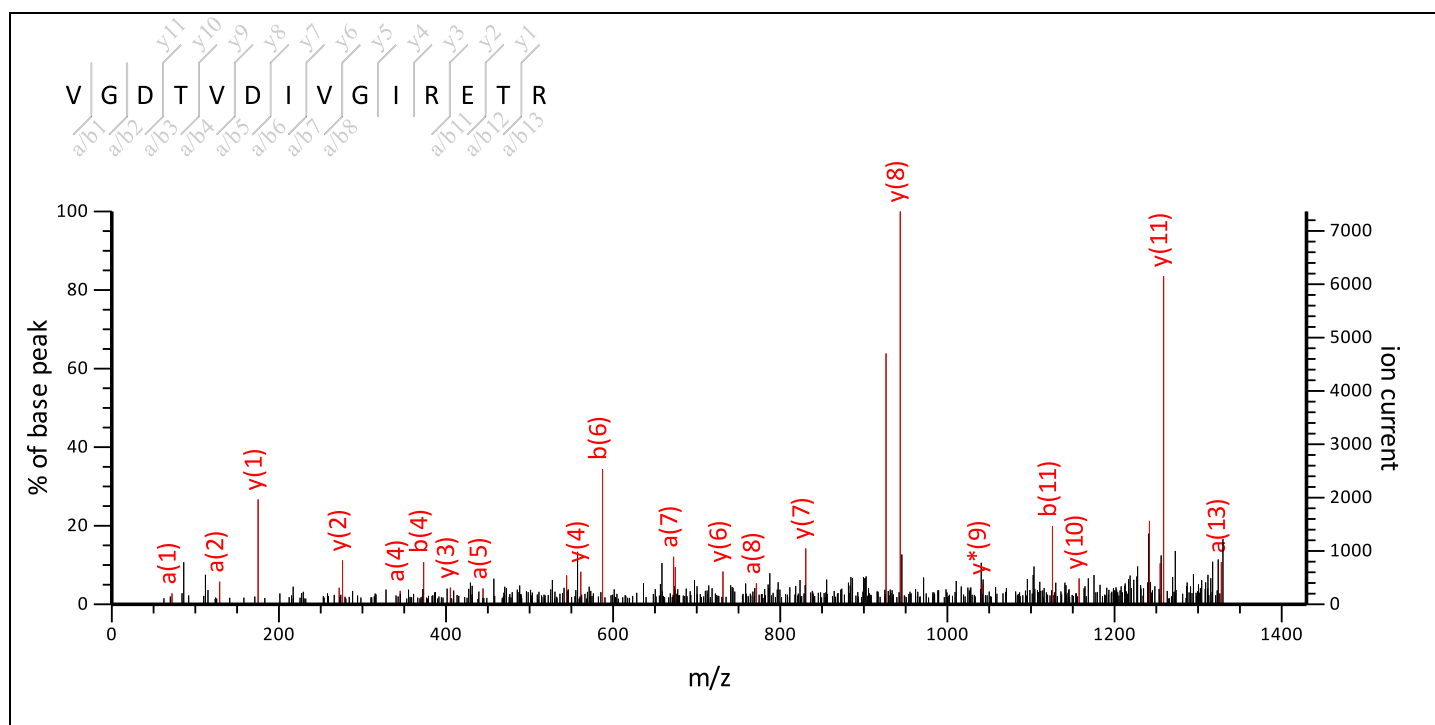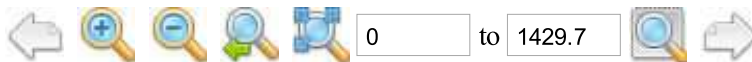

Label all possible matches  Label matches used for scoring

**Monoisotopic mass of neutral peptide Mr(calc):** 1528.8209

**Fixed modifications:** Carbamidomethyl (C) (apply to specified residues or termini only)

**Ions Score:** 45 **Expect:** 0.061

**Matches:** 26/58 fragment ions using 78 most intense peaks ([help](#))

| # | a               | a* | b               | b* | Seq.     | y                | y*               | #         |
|---|-----------------|----|-----------------|----|----------|------------------|------------------|-----------|
| 1 | <b>72.0808</b>  |    | 100.0757        |    | <b>V</b> |                  |                  | <b>14</b> |
| 2 | <b>129.1022</b> |    | 157.0972        |    | <b>G</b> | 1430.7598        | 1413.7332        | <b>13</b> |
| 3 | 244.1292        |    | <b>272.1241</b> |    | <b>D</b> | 1373.7383        | 1356.7118        | <b>12</b> |
| 4 | <b>345.1769</b> |    | <b>373.1718</b> |    | <b>T</b> | <b>1258.7114</b> | <b>1241.6848</b> | <b>11</b> |
| 5 | <b>444.2453</b> |    | 472.2402        |    | <b>V</b> | <b>1157.6637</b> | 1140.6371        | <b>10</b> |
| 6 | 559.2722        |    | <b>587.2671</b> |    | <b>D</b> | 1058.5953        | <b>1041.5687</b> | <b>9</b>  |
| 7 | <b>672.3563</b> |    | 700.3512        |    | <b>I</b> | <b>943.5683</b>  | <b>926.5418</b>  | <b>8</b>  |
| 8 | <b>771.4247</b> |    | 799.4196        |    | <b>V</b> | <b>830.4843</b>  | 813.4577         | <b>7</b>  |

|    |           |           |           |           |   |          |          |   |
|----|-----------|-----------|-----------|-----------|---|----------|----------|---|
| 9  | 828.4462  |           | 856.4411  |           | G | 731.4159 | 714.3893 | 6 |
| 10 | 941.5302  |           | 969.5251  |           | I | 674.3944 | 657.3679 | 5 |
| 11 | 1097.6313 | 1080.6048 | 1125.6263 | 1108.5997 | R | 561.3103 | 544.2838 | 4 |
| 12 | 1226.6739 | 1209.6474 | 1254.6688 | 1237.6423 | E | 405.2092 | 388.1827 | 3 |
| 13 | 1327.7216 | 1310.6951 | 1355.7165 | 1338.6900 | T | 276.1666 | 259.1401 | 2 |
| 14 |           |           |           |           | R | 175.1190 | 158.0924 | 1 |

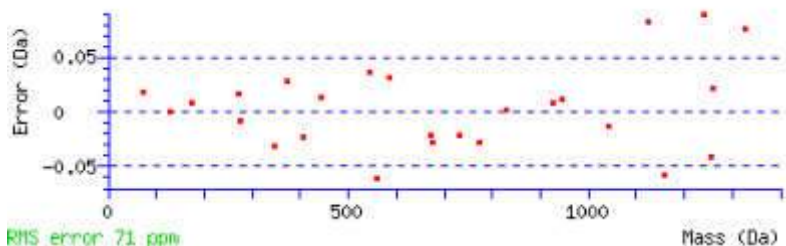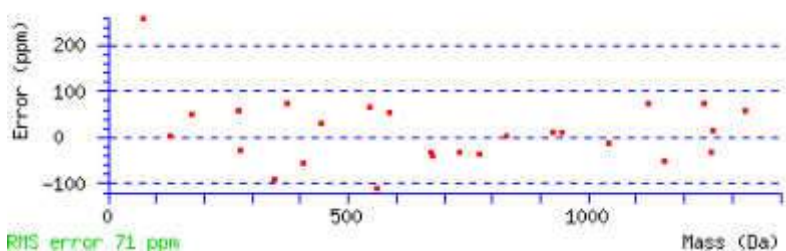

NCBI **BLAST** search of [VGDTV DIVGIRETR](#)

(Parameters: blastp, nr protein database, expect=20000, no filter, PAM30)

Other BLAST [web gateways](#)

#### All matches to this query

| Score | Mr(calc)  | Delta   | Sequence                        |
|-------|-----------|---------|---------------------------------|
| 44.8  | 1528.8209 | -0.0147 | <a href="#">VGDTV DIVGIRETR</a> |
| 27.6  | 1528.7555 | 0.0507  | <a href="#">ISAAMPVHSKDTEK</a>  |
| 23.1  | 1528.7310 | 0.0752  | <a href="#">EQWVEAISWEPR</a>    |
| 21.8  | 1528.8097 | -0.0034 | <a href="#">ISDGALVEAAILSDR</a> |
| 21.5  | 1528.7668 | 0.0394  | <a href="#">MPQAOGGTAVSLTPR</a> |
| 20.7  | 1528.7482 | 0.0581  | <a href="#">AVSSNGSPSPVTSR</a>  |
| 20.5  | 1528.8209 | -0.0147 | <a href="#">VGDTVEIVGVRETR</a>  |
| 18.8  | 1528.7555 | 0.0507  | <a href="#">EAAELAADSPMGVLR</a> |
| 17.3  | 1528.8283 | -0.0221 | <a href="#">MATIPAAITPSISR</a>  |
| 16.5  | 1528.7780 | 0.0283  | <a href="#">EMVNLLRNNSPR</a>    |

Mascot: <http://www.matrixscience.com/>

# MATRIX SCIENCE Mascot Search Results

## Peptide View **Spot no 71**

MS/MS Fragmentation of **TMDDAMAGDNVGLLLR**

Found in **gi|6525065** in **NCBI nr**, chloroplast translational elongation factor Tu [*Oryza sativa* Japonica Group]

Match to Query 45: 1722.761524 from(1723.768800,1+) intensity(0.0000) index(18)

Title: Label: B3, Spot\_Id: 219707, Peak\_List\_Id: 225171, MSMS Job\_Run\_Id: 21768, Comment:

Data file C:\Documents and Settings\Administrator\Desktop\farah BHU\spot set plate\Farah-Garima 11May 2013\ppw\_B3\_136842116600.txt

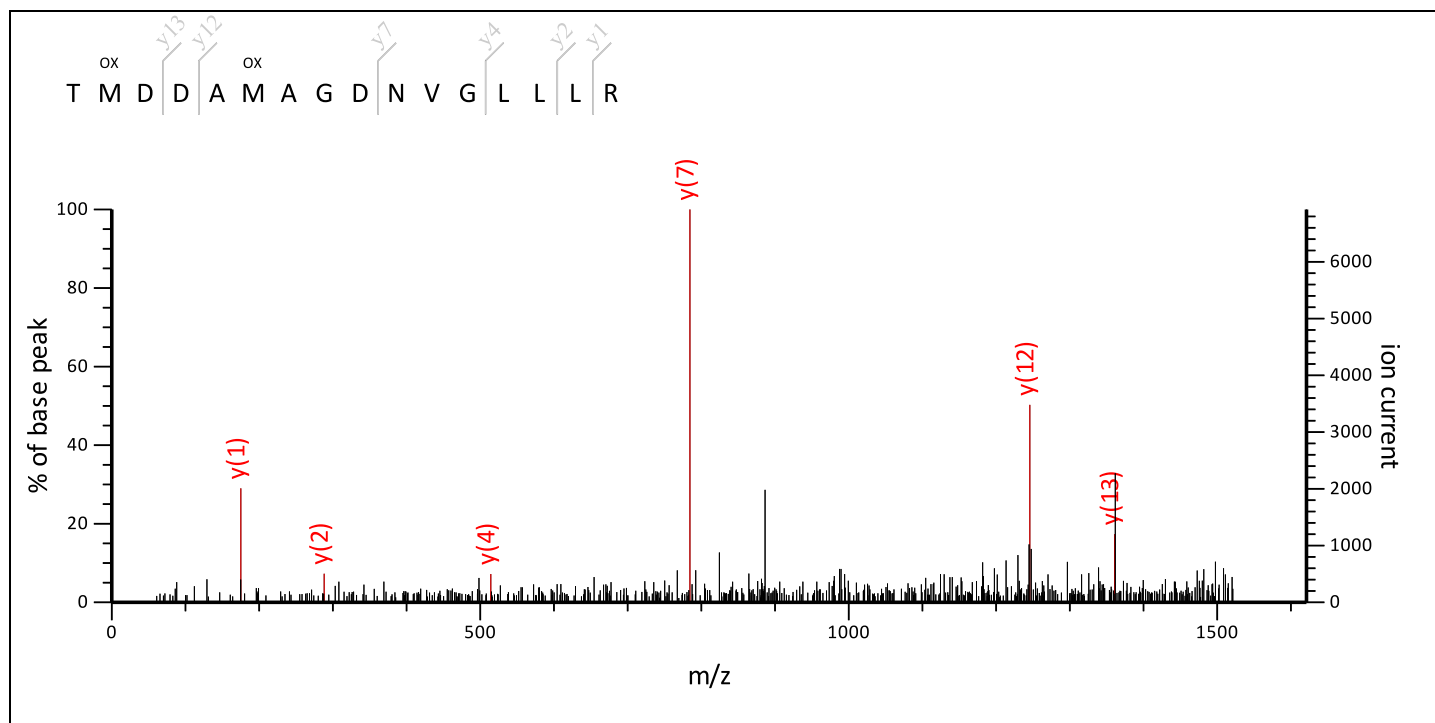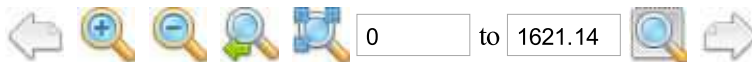

Label all possible matches  Label matches used for scoring

**Monoisotopic mass of neutral peptide Mr(calc):** 1722.7917

**Fixed modifications:** Carbamidomethyl (C) (apply to specified residues or termini only)

**Variable modifications:**

**M2** : Oxidation (M), with neutral losses 0.0000 (shown in table), 63.9983

**M6** : Oxidation (M), with neutral losses 0.0000 (shown in table), 63.9983

**Ions Score:** 25 **Expect:** 4.3

**Matches** : 7/122 fragment ions using 15 most intense peaks ([help](#))

| # | a        | a* | b        | b* | Seq. | y         | y*        | #  |
|---|----------|----|----------|----|------|-----------|-----------|----|
| 1 | 74.0600  |    | 102.0550 |    | T    |           |           | 16 |
| 2 | 221.0954 |    | 249.0904 |    | M    | 1622.7513 | 1605.7247 | 15 |
| 3 | 336.1224 |    | 364.1173 |    | D    | 1475.7159 | 1458.6893 | 14 |
| 4 | 451.1493 |    | 479.1442 |    | D    | 1360.6889 | 1343.6624 | 13 |
| 5 | 522.1864 |    | 550.1814 |    | A    | 1245.6620 | 1228.6354 | 12 |
| 6 | 669.2218 |    | 697.2168 |    | M    | 1174.6249 | 1157.5983 | 11 |

|    |           |           |           |           |   |                 |           |    |
|----|-----------|-----------|-----------|-----------|---|-----------------|-----------|----|
| 7  | 740.2590  |           | 768.2539  |           | A | 1027.5895       | 1010.5629 | 10 |
| 8  | 797.2804  |           | 825.2753  |           | G | 956.5524        | 939.5258  | 9  |
| 9  | 912.3074  |           | 940.3023  |           | D | 899.5309        | 882.5043  | 8  |
| 10 | 1026.3503 | 1009.3237 | 1054.3452 | 1037.3187 | N | <b>784.5039</b> | 767.4774  | 7  |
| 11 | 1125.4187 | 1108.3922 | 1153.4136 | 1136.3871 | V | 670.4610        | 653.4345  | 6  |
| 12 | 1182.4402 | 1165.4136 | 1210.4351 | 1193.4085 | G | 571.3926        | 554.3661  | 5  |
| 13 | 1295.5242 | 1278.4977 | 1323.5191 | 1306.4926 | L | <b>514.3711</b> | 497.3446  | 4  |
| 14 | 1408.6083 | 1391.5817 | 1436.6032 | 1419.5767 | L | 401.2871        | 384.2605  | 3  |
| 15 | 1521.6924 | 1504.6658 | 1549.6873 | 1532.6607 | L | <b>288.2030</b> | 271.1765  | 2  |
| 16 |           |           |           |           | R | <b>175.1190</b> | 158.0924  | 1  |

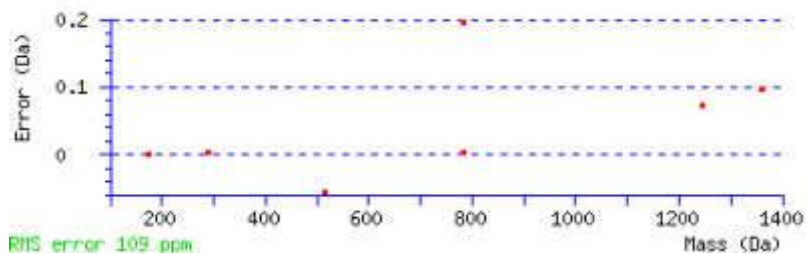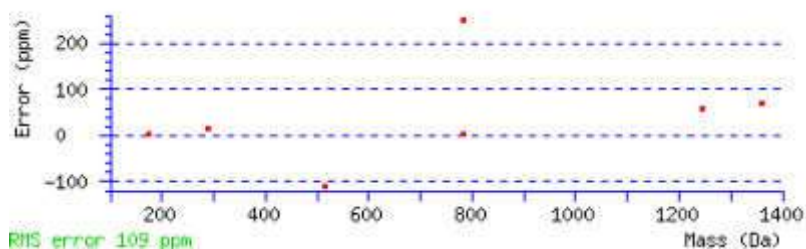

NCBI **BLAST** search of [TMDDAMAGDNVGLLLR](#)

(Parameters: blastp, nr protein database, expect=20000, no filter, PAM30)

Other BLAST [web gateways](#)

#### All matches to this query

| Score | Mr(calc)  | Delta   | Sequence                          |
|-------|-----------|---------|-----------------------------------|
| 25.2  | 1722.7917 | -0.0301 | <a href="#">TMDDAMAGDNVGLLLR</a>  |
| 10.9  | 1722.8862 | -0.1247 | <a href="#">ESFMELKTDELILR</a>    |
| 3.5   | 1722.7640 | -0.0025 | <a href="#">WIDMRELPMNCSR</a>     |
| 3.0   | 1722.8424 | -0.0809 | <a href="#">KSSSSEEAPASFVEIR</a>  |
| 2.0   | 1722.8901 | -0.1285 | <a href="#">QVITESDLTPNHTLR</a>   |
| 1.8   | 1722.7155 | 0.0460  | <a href="#">DSVIPADPNDSYCR</a>    |
| 1.7   | 1722.9264 | -0.1649 | <a href="#">KGPSSGNLPAALDVEIR</a> |
| 1.6   | 1722.8247 | -0.0631 | <a href="#">DIADNSMPNLIYVSR</a>   |
| 1.5   | 1722.7784 | -0.0169 | <a href="#">ASGFMGWTSHSASLER</a>  |
| 1.4   | 1722.9125 | -0.1510 | <a href="#">LLDHSRTVGGSQGIR</a>   |

Mascot: <http://www.matrixscience.com/>



# MATRIX SCIENCE Mascot Search Results

## Peptide View **Spot no 71**

MS/MS Fragmentation of **HYAHVDCPGHADYVK**

Found in **gi|6525065** in **NCBIInr**, chloroplast translational elongation factor Tu [Oryza sativa Japonica Group]

Match to Query 47: 1767.754124 from(1768.761400,1+) intensity(0.0000) index(19)

Title: Label: B3, Spot\_Id: 219707, Peak\_List\_Id: 225169, MSMS Job\_Run\_Id: 21768, Comment:

Data file C:\Documents and Settings\Administrator\Desktop\farah BHU\spot set plate\Farah-Garima 11May 2013\ppw\_B3\_136842116600.txt

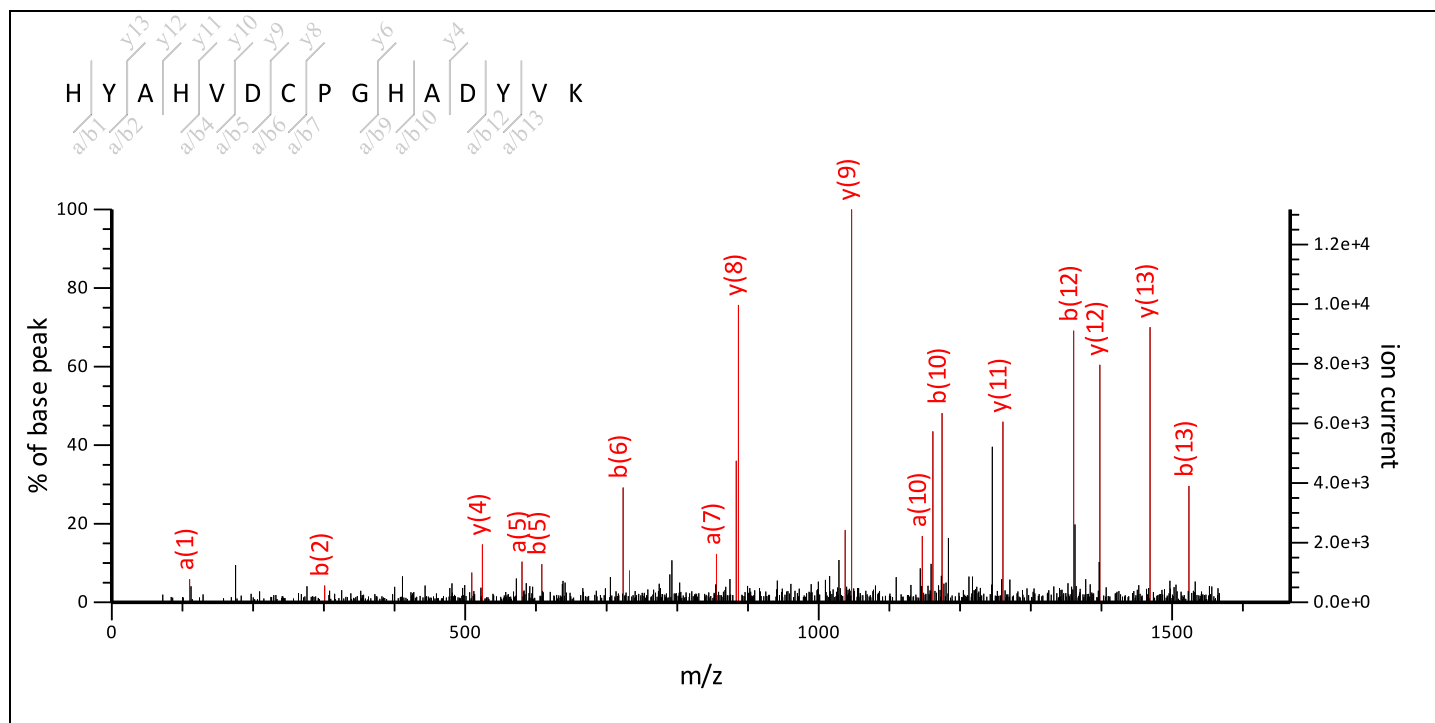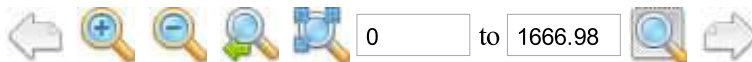

Label all possible matches  Label matches used for scoring

**Monoisotopic mass of neutral peptide Mr(calc):** 1767.7787

**Fixed modifications:** Carbamidomethyl (C) (apply to specified residues or termini only)

**Ions Score:** 73 **Expect:** 8e-05

**Matches:** 21/56 fragment ions using 30 most intense peaks ([help](#))

| # | a        | b        | Seq. | y         | y*        | #  |
|---|----------|----------|------|-----------|-----------|----|
| 1 | 110.0713 | 138.0662 | H    |           |           | 15 |
| 2 | 273.1346 | 301.1295 | Y    | 1631.7271 | 1614.7006 | 14 |
| 3 | 344.1717 | 372.1666 | A    | 1468.6638 | 1451.6372 | 13 |
| 4 | 481.2306 | 509.2255 | H    | 1397.6267 | 1380.6001 | 12 |
| 5 | 580.2990 | 608.2940 | V    | 1260.5678 | 1243.5412 | 11 |
| 6 | 695.3260 | 723.3209 | D    | 1161.4993 | 1144.4728 | 10 |
| 7 | 855.3566 | 883.3515 | C    | 1046.4724 | 1029.4458 | 9  |
| 8 | 952.4094 | 980.4043 | P    | 886.4417  | 869.4152  | 8  |

|    |                  |                  |          |                 |          |          |
|----|------------------|------------------|----------|-----------------|----------|----------|
| 9  | 1009.4309        | <b>1037.4258</b> | <b>G</b> | 789.3890        | 772.3624 | <b>7</b> |
| 10 | <b>1146.4898</b> | <b>1174.4847</b> | <b>H</b> | <b>732.3675</b> | 715.3410 | <b>6</b> |
| 11 | 1217.5269        | 1245.5218        | <b>A</b> | 595.3086        | 578.2821 | <b>5</b> |
| 12 | 1332.5538        | <b>1360.5487</b> | <b>D</b> | <b>524.2715</b> | 507.2449 | <b>4</b> |
| 13 | 1495.6172        | <b>1523.6121</b> | <b>Y</b> | 409.2445        | 392.2180 | <b>3</b> |
| 14 | 1594.6856        | 1622.6805        | <b>V</b> | 246.1812        | 229.1547 | <b>2</b> |
| 15 |                  |                  | <b>K</b> | 147.1128        | 130.0863 | <b>1</b> |

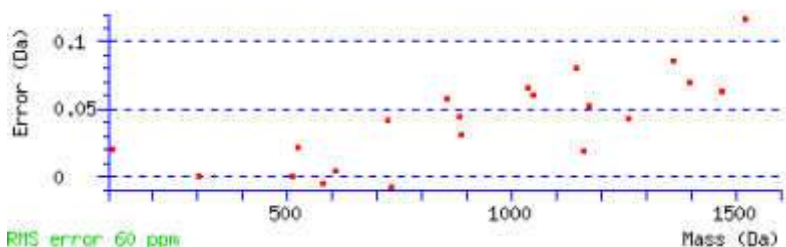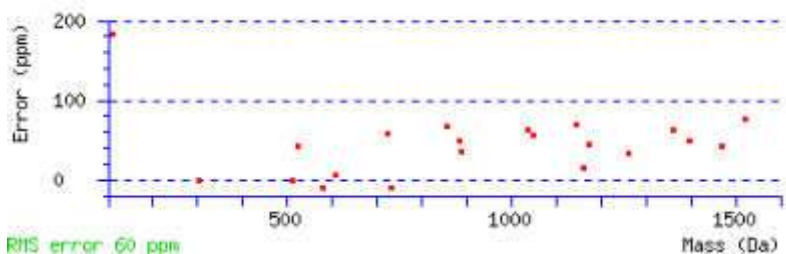

NCBI **BLAST** search of [HYAHVDCPGHADYVK](#)

(Parameters: blastp, nr protein database, expect=20000, no filter, PAM30)

Other BLAST [web gateways](#)

#### All matches to this query

| Score | Mr(calc)  | Delta   | Sequence                          |
|-------|-----------|---------|-----------------------------------|
| 72.6  | 1767.7787 | -0.0246 | <a href="#">HYAHVDCPGHADYVK</a>   |
| 9.2   | 1767.8652 | -0.1111 | <a href="#">HSVVDVANYNHSIVSAR</a> |
| 7.8   | 1767.8441 | -0.0900 | <a href="#">HINKDGPHFNEAAYR</a>   |
| 7.8   | 1767.8077 | -0.0536 | <a href="#">HINQDGPHFNEAAYR</a>   |
| 7.7   | 1767.8760 | -0.1219 | <a href="#">INTPALICHNMIEAR</a>   |
| 5.5   | 1767.8839 | -0.1297 | <a href="#">HVREHGVQYMLEVR</a>    |
| 5.2   | 1767.8944 | -0.1403 | <a href="#">NLDLVAEKYQSWFR</a>    |
| 5.2   | 1767.7291 | 0.0250  | <a href="#">EGEEGMVDQAQATMEK</a>  |
| 4.8   | 1767.8072 | -0.0531 | <a href="#">SVMEYLCEFNLAR</a>     |
| 4.8   | 1767.8219 | -0.0678 | <a href="#">HVYYVCATTGGKLCMR</a>  |

Mascot: <http://www.matrixscience.com/>

# MATRIX SCIENCE Mascot Search Results

## Peptide View Spot no 71

MS/MS Fragmentation of **GITINTATVEYETETR**

Found in **gi|6525065** in **NCBIInr**, chloroplast translational elongation factor Tu [Oryza sativa Japonica Group]

Match to Query 51: 1796.863524 from(1797.870800,1+) intensity(0.0000) index(21)

Title: Label: B3, Spot\_Id: 219707, Peak\_List\_Id: 225177, MSMS Job\_Run\_Id: 21768, Comment:

Data file C:\Documents and Settings\Administrator\Desktop\farah BHU\spot set plate\Farah-Garima 11May 2013\ppw\_B3\_136842116600.txt

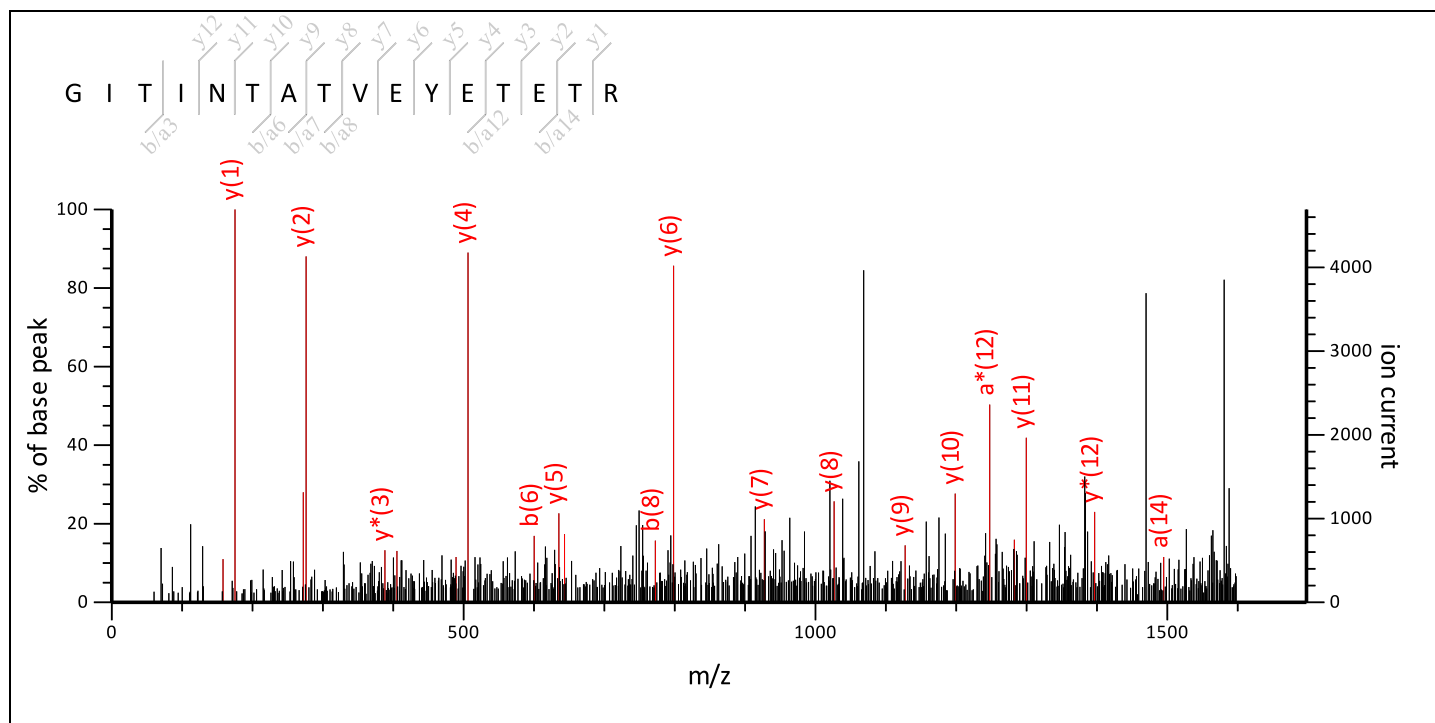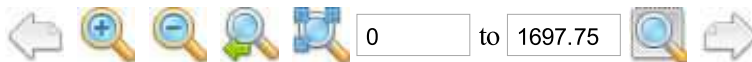

Label all possible matches  Label matches used for scoring

**Monoisotopic mass of neutral peptide Mr(calc):** 1796.8792

**Fixed modifications:** Carbamidomethyl (C) (apply to specified residues or termini only)

**Ions Score:** 44 **Expect:** 0.068

**Matches:** 22/82 fragment ions using 64 most intense peaks ([help](#))

| # | a               | a*       | b               | b*       | Seq.     | y                | y*               | #  |
|---|-----------------|----------|-----------------|----------|----------|------------------|------------------|----|
| 1 | 30.0338         |          | 58.0287         |          | <b>G</b> |                  |                  | 16 |
| 2 | 143.1179        |          | 171.1128        |          | <b>I</b> | 1740.8650        | 1723.8385        | 15 |
| 3 | 244.1656        |          | <b>272.1605</b> |          | <b>T</b> | 1627.7810        | 1610.7544        | 14 |
| 4 | 357.2496        |          | 385.2445        |          | <b>I</b> | 1526.7333        | 1509.7067        | 13 |
| 5 | 471.2926        | 454.2660 | 499.2875        | 482.2609 | <b>N</b> | 1413.6492        | <b>1396.6227</b> | 12 |
| 6 | 572.3402        | 555.3137 | <b>600.3352</b> | 583.3086 | <b>T</b> | <b>1299.6063</b> | <b>1282.5798</b> | 11 |
| 7 | <b>643.3774</b> | 626.3508 | 671.3723        | 654.3457 | <b>A</b> | <b>1198.5586</b> | 1181.5321        | 10 |
| 8 | 744.4250        | 727.3985 | <b>772.4199</b> | 755.3934 | <b>T</b> | <b>1127.5215</b> | 1110.4950        | 9  |

|    |                  |                  |           |           |   |                  |                 |   |
|----|------------------|------------------|-----------|-----------|---|------------------|-----------------|---|
| 9  | 843.4934         | 826.4669         | 871.4884  | 854.4618  | V | <b>1026.4738</b> | 1009.4473       | 8 |
| 10 | 972.5360         | 955.5095         | 1000.5310 | 983.5044  | E | <b>927.4054</b>  | 910.3789        | 7 |
| 11 | 1135.5994        | 1118.5728        | 1163.5943 | 1146.5677 | Y | <b>798.3628</b>  | 781.3363        | 6 |
| 12 | 1264.6420        | <b>1247.6154</b> | 1292.6369 | 1275.6103 | E | <b>635.2995</b>  | 618.2729        | 5 |
| 13 | 1365.6896        | 1348.6631        | 1393.6846 | 1376.6580 | T | <b>506.2569</b>  | <b>489.2304</b> | 4 |
| 14 | <b>1494.7322</b> | 1477.7057        | 1522.7271 | 1505.7006 | E | <b>405.2092</b>  | <b>388.1827</b> | 3 |
| 15 | 1595.7799        | 1578.7534        | 1623.7748 | 1606.7483 | T | <b>276.1666</b>  | 259.1401        | 2 |
| 16 |                  |                  |           |           | R | <b>175.1190</b>  | <b>158.0924</b> | 1 |

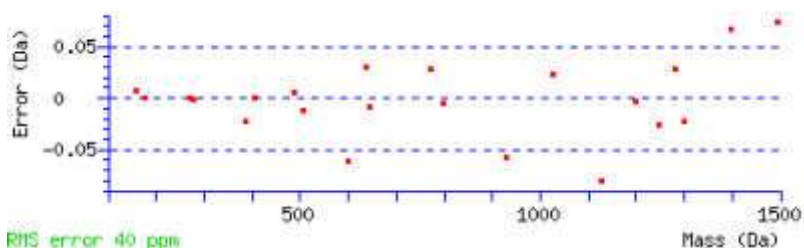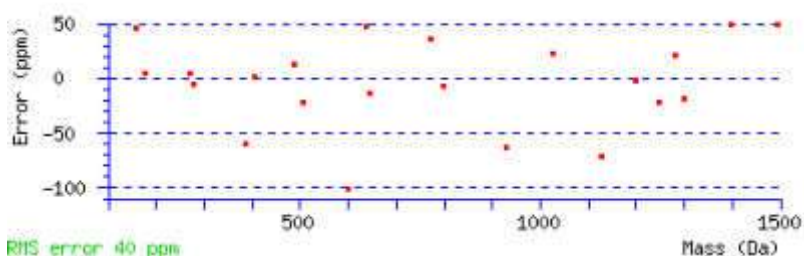

NCBI **BLAST** search of [GITINTATVEYETETR](#)

(Parameters: blastp, nr protein database, expect=20000, no filter, PAM30)

Other BLAST [web gateways](#)

#### All matches to this query

| Score | Mr(calc)  | Delta   | Sequence                          |
|-------|-----------|---------|-----------------------------------|
| 43.8  | 1796.8792 | -0.0157 | <a href="#">GITINTATVEYETETR</a>  |
| 7.7   | 1796.7119 | 0.1516  | <a href="#">SGSPMREDGETDDETR</a>  |
| 7.1   | 1796.9203 | -0.0568 | <a href="#">ISQSMASKPYTRATR</a>   |
| 4.8   | 1796.9380 | -0.0745 | <a href="#">SLSNPTSSLRISEGPR</a>  |
| 3.6   | 1796.9203 | -0.0568 | <a href="#">GVDGSGANHLGTLMSIR</a> |
| 3.5   | 1796.8776 | -0.0141 | <a href="#">KFEFMGLLCCHVLK</a>    |
| 3.4   | 1796.8549 | 0.0086  | <a href="#">RFDDALSLMENLMSR</a>   |
| 3.3   | 1796.9342 | -0.0707 | <a href="#">QFETSNKALASTLIMK</a>  |
| 3.2   | 1796.8358 | 0.0277  | <a href="#">AMVAEMESLAKDMVEK</a>  |
| 2.6   | 1796.8529 | 0.0106  | <a href="#">HFMNPRTYDLGPHGR</a>   |

Mascot: <http://www.matrixscience.com/>

# MATRIX SCIENCE Mascot Search Results

## Peptide View **Spot no 71**

MS/MS Fragmentation of **TKPHVNI GTIGHVDHGK**

Found in **gi|6525065** in **NCBI nr**, chloroplast translational elongation factor Tu [*Oryza sativa* Japonica Group]

Match to Query 53: 1808.939124 from(1809.946400,1+) intensity(0.0000) index(22)

Title: Label: B3, Spot\_Id: 219707, Peak\_List\_Id: 225174, MSMS Job\_Run\_Id: 21768, Comment:

Data file C:\Documents and Settings\Administrator\Desktop\farah BHU\spot set plate\Farah-Garima 11May 2013\ppw\_B3\_136842116600.txt

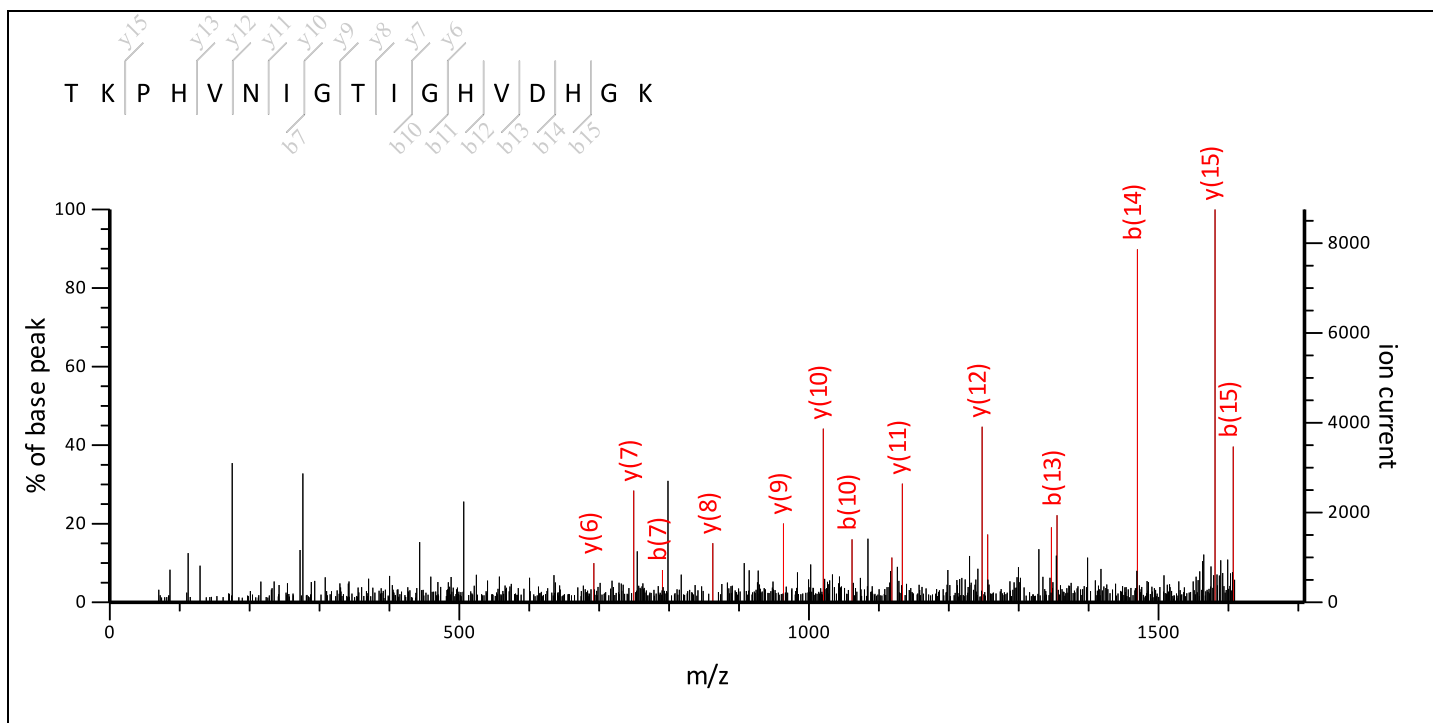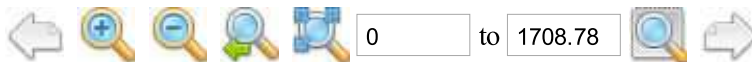

Label all possible matches  Label matches used for scoring

**Monoisotopic mass of neutral peptide Mr(calc):** 1808.9646

**Fixed modifications:** Carbamidomethyl (C) (apply to specified residues or termini only)

**Ions Score:** 42 **Expect:** 0.19

**Matches :** 16/94 fragment ions using 48 most intense peaks ([help](#))

| # | a        | a*       | b               | b*       | Seq. | y                | y*        | #  |
|---|----------|----------|-----------------|----------|------|------------------|-----------|----|
| 1 | 74.0600  |          | 102.0550        |          | T    |                  |           | 17 |
| 2 | 202.1550 | 185.1285 | 230.1499        | 213.1234 | K    | 1708.9242        | 1691.8976 | 16 |
| 3 | 299.2078 | 282.1812 | 327.2027        | 310.1761 | P    | <b>1580.8292</b> | 1563.8027 | 15 |
| 4 | 436.2667 | 419.2401 | 464.2616        | 447.2350 | H    | 1483.7764        | 1466.7499 | 14 |
| 5 | 535.3351 | 518.3085 | 563.3300        | 546.3035 | V    | <b>1346.7175</b> | 1329.6910 | 13 |
| 6 | 649.3780 | 632.3515 | 677.3729        | 660.3464 | N    | <b>1247.6491</b> | 1230.6226 | 12 |
| 7 | 762.4621 | 745.4355 | <b>790.4570</b> | 773.4304 | I    | <b>1133.6062</b> | 1116.5796 | 11 |
| 8 | 819.4835 | 802.4570 | 847.4785        | 830.4519 | G    | <b>1020.5221</b> | 1003.4956 | 10 |

|    |           |           |                  |           |   |                 |          |   |
|----|-----------|-----------|------------------|-----------|---|-----------------|----------|---|
| 9  | 920.5312  | 903.5047  | 948.5261         | 931.4996  | T | <b>963.5007</b> | 946.4741 | 9 |
| 10 | 1033.6153 | 1016.5887 | <b>1061.6102</b> | 1044.5837 | I | <b>862.4530</b> | 845.4264 | 8 |
| 11 | 1090.6368 | 1073.6102 | <b>1118.6317</b> | 1101.6051 | G | <b>749.3689</b> | 732.3424 | 7 |
| 12 | 1227.6957 | 1210.6691 | <b>1255.6906</b> | 1238.6640 | H | <b>692.3474</b> | 675.3209 | 6 |
| 13 | 1326.7641 | 1309.7375 | <b>1354.7590</b> | 1337.7324 | V | 555.2885        | 538.2620 | 5 |
| 14 | 1441.7910 | 1424.7645 | <b>1469.7859</b> | 1452.7594 | D | 456.2201        | 439.1936 | 4 |
| 15 | 1578.8499 | 1561.8234 | <b>1606.8449</b> | 1589.8183 | H | 341.1932        | 324.1666 | 3 |
| 16 | 1635.8714 | 1618.8449 | 1663.8663        | 1646.8398 | G | 204.1343        | 187.1077 | 2 |
| 17 |           |           |                  |           | K | 147.1128        | 130.0863 | 1 |

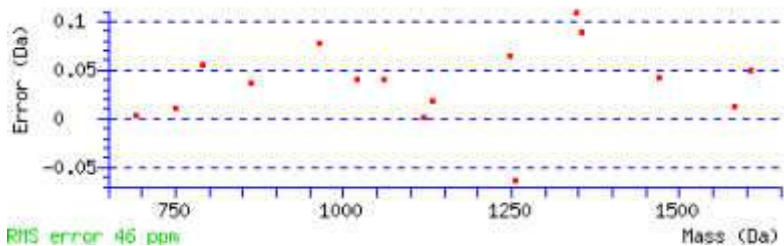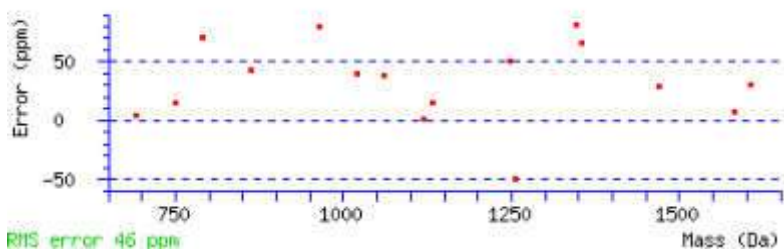

NCBI **BLAST** search of [TKPHVNIGTIGHVDHGK](#)

(Parameters: blastp, nr protein database, expect=20000, no filter, PAM30)

Other BLAST [web gateways](#)

#### All matches to this query

| Score | Mr(calc)  | Delta   | Sequence                          |
|-------|-----------|---------|-----------------------------------|
| 42.4  | 1808.9646 | -0.0255 | <a href="#">TKPHVNIGTIGHVDHGK</a> |
| 28.3  | 1809.0010 | -0.0618 | <a href="#">KKPHVSIQTIGHVDHGK</a> |
| 27.5  | 1808.9646 | -0.0255 | <a href="#">TKPHLNVTGIGHVDHGK</a> |
| 11.5  | 1808.9594 | -0.0202 | <a href="#">MATTELKSDAIFELLK</a>  |
| 7.4   | 1808.8781 | 0.0611  | <a href="#">IVYPFGIGRGCYHDR</a>   |
| 7.0   | 1808.8211 | 0.1180  | <a href="#">SLPMQVTSNSVSGDDTR</a> |
| 6.9   | 1808.8476 | 0.0916  | <a href="#">HSVSFSTTRGMLDDTR</a>  |
| 5.2   | 1808.9394 | -0.0003 | <a href="#">GSYREVQSIHRPQPR</a>   |
| 4.7   | 1809.0624 | -0.1233 | <a href="#">KHLALGNTLLNILYAR</a>  |
| 4.5   | 1808.9758 | -0.0367 | <a href="#">HNIRNISVIAHVDHGK</a>  |

Mascot: <http://www.matrixscience.com/>


**Mascot Search Results**
**Peptide View** Spot no 72
MS/MS Fragmentation of **FVIGGPHGDAGLTGR**
 Found in **gij127046** in **NCBI nr**, RecName: Full=S-adenosylmethionine synthase 2; Short=AdoMet synthase 2; AltName: Full=Methionine adenosyltransferase 2; Short=MAT 2

Match to Query 8: 1452.810224 from(1453.817500,1+) intensity(0.0000) index(3)

Title: Label: F9, Spot\_Id: 228975, Peak\_List\_Id: 257839, MSMS Job\_Run\_Id: 24938, Comment:

Data file ppw\_F9\_138985151700.txt

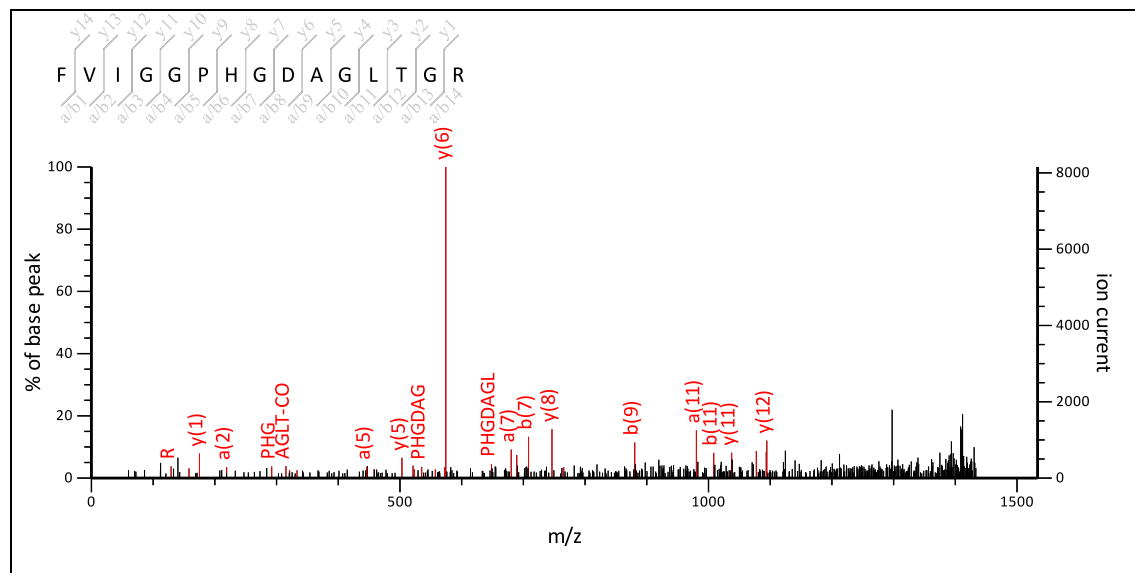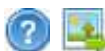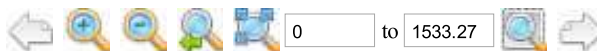
 Label all possible matches  Label matches used for scoring 

Monoisotopic mass of neutral peptide Mr(calc): 1452.7474

Fixed modifications: Carbamidomethyl (C) (apply to specified residues or termini only)

Ions Score: 46 Expect: 0.058

Matches : 37/241 fragment ions using 70 most intense peaks ([help](#))

| #  | Immon.          | a                | a <sup>0</sup> | b                | b <sup>0</sup> | d         | d <sup>t</sup> | Seq. | v         | w         | w <sup>t</sup> | y                | y <sup>*</sup>   | y <sup>0</sup>  | #  |
|----|-----------------|------------------|----------------|------------------|----------------|-----------|----------------|------|-----------|-----------|----------------|------------------|------------------|-----------------|----|
| 1  | 120.0808        | 120.0808         |                | 148.0757         |                | 44.0495   |                | F    |           |           |                |                  |                  |                 | 15 |
| 2  | 72.0808         | <b>219.1492</b>  |                | 247.1441         |                | 205.1335  |                | V    | 1262.6236 | 1275.6440 |                | 1306.6862        | 1289.6597        | 1288.6757       | 14 |
| 3  | 86.0964         | 332.2333         |                | 360.2282         |                | 304.2020  | 318.2176       | I    | 1149.5396 | 1162.5600 | 1176.5756      | 1207.6178        | 1190.5913        | 1189.6072       | 13 |
| 4  | 30.0338         | 389.2547         |                | 417.2496         |                |           |                | G    |           |           |                | <b>1094.5337</b> | <b>1077.5072</b> | 1076.5232       | 12 |
| 5  | 30.0338         | <b>446.2762</b>  |                | 474.2711         |                |           |                | G    |           |           |                | <b>1037.5123</b> | 1020.4857        | 1019.5017       | 11 |
| 6  | 70.0651         | 543.3289         |                | 571.3239         |                | 517.3133  |                | P    | 938.4439  | 937.4486  |                | <b>980.4908</b>  | 963.4643         | 962.4803        | 10 |
| 7  | 110.0713        | <b>680.3879</b>  |                | <b>708.3828</b>  |                |           |                | H    | 801.3850  |           |                | 883.4381         | 866.4115         | 865.4275        | 9  |
| 8  | 30.0338         | 737.4093         |                | <b>765.4042</b>  |                |           |                | G    |           |           |                | <b>746.3791</b>  | 729.3526         | 728.3686        | 8  |
| 9  | 88.0393         | 852.4363         | 834.4257       | <b>880.4312</b>  | 862.4206       | 808.4464  |                | D    | 629.3366  | 628.3413  |                | <b>689.3577</b>  | 672.3311         | 671.3471        | 7  |
| 10 | 44.0495         | 923.4734         | 905.4628       | 951.4683         | 933.4577       |           |                | A    | 558.2994  |           |                | <b>574.3307</b>  | <b>557.3042</b>  | 556.3202        | 6  |
| 11 | 30.0338         | <b>980.4948</b>  | 962.4843       | <b>1008.4898</b> | 990.4792       |           |                | G    |           |           |                | <b>503.2936</b>  | 486.2671         | 485.2831        | 5  |
| 12 | 86.0964         | <b>1093.5789</b> | 1075.5683      | 1121.5738        | 1103.5633      | 1051.5320 |                | L    | 388.1939  | 387.1987  |                | <b>446.2722</b>  | 429.2456         | 428.2616        | 4  |
| 13 | 74.0600         | 1194.6266        | 1176.6160      | 1222.6215        | 1204.6109      | 1178.6317 | 1180.6109      | T    | 287.1462  | 300.1666  | 302.1459       | <b>333.1881</b>  | 316.1615         | <b>315.1775</b> | 3  |
| 14 | 30.0338         | 1251.6480        | 1233.6375      | 1279.6430        | 1261.6324      |           |                | G    |           |           |                | 232.1404         | 215.1139         |                 | 2  |
| 15 | <b>129.1135</b> |                  |                |                  |                |           |                | R    | 74.0237   | 73.0284   |                | <b>175.1190</b>  | <b>158.0924</b>  |                 | 1  |

| Seq   | ya       | yb       | Seq    | ya       | yb       | Seq     | ya       | yb       |
|-------|----------|----------|--------|----------|----------|---------|----------|----------|
| VI    | 185.1648 | 213.1598 | VIG    | 242.1863 | 270.1812 | VIGG    | 299.2078 | 327.2027 |
| VIGGP | 396.2605 | 424.2554 | VIGGPH | 533.3194 | 561.3144 | VIGGPHG | 590.3409 | 618.3358 |



|          |          |          |          |          |          |          |          |          |
|----------|----------|----------|----------|----------|----------|----------|----------|----------|
| IG       | 143.1179 | 171.1128 | IGG      | 200.1394 | 228.1343 | IGGP     | 297.1921 | 325.1870 |
| IGGPH    | 434.2510 | 462.2459 | IGGPHG   | 491.2725 | 519.2674 | IGGPHGD  | 606.2994 | 634.2944 |
| IGGPHGDA | 677.3365 | 705.3315 | GG       | 87.0553  | 115.0502 | GGP      | 184.1081 | 212.1030 |
| GGPH     | 321.1670 | 349.1619 | GGPHG    | 378.1884 | 406.1833 | GGPHGD   | 493.2154 | 521.2103 |
| GGPHGDA  | 564.2525 | 592.2474 | GGPHGDAG | 621.2740 | 649.2689 | GP       | 127.0866 | 155.0815 |
| GPH      | 264.1455 | 292.1404 | GPHG     | 321.1670 | 349.1619 | GPHGD    | 436.1939 | 464.1888 |
| GPHGDA   | 507.2310 | 535.2259 | GPHGDAG  | 564.2525 | 592.2474 | GPHGDAGL | 677.3365 | 705.3315 |
| PH       | 207.1240 | 235.1190 | PHG      | 264.1455 | 292.1404 | PHGD     | 379.1724 | 407.1674 |
| PHGDA    | 450.2096 | 478.2045 | PHGDAG   | 507.2310 | 535.2259 | PHGDAGL  | 620.3151 | 648.3100 |
| HG       | 167.0927 | 195.0877 | HGD      | 282.1197 | 310.1146 | HGDA     | 353.1568 | 381.1517 |
| HGDAG    | 410.1783 | 438.1732 | HGDAGL   | 523.2623 | 551.2572 | HGDAGLT  | 624.3100 | 652.3049 |
| HGDAGLTG | 681.3315 | 709.3264 | GD       | 145.0608 | 173.0557 | GDA      | 216.0979 | 244.0928 |
| GDAG     | 273.1193 | 301.1143 | GDAGL    | 386.2034 | 414.1983 | GDAGLT   | 487.2511 | 515.2460 |
| GDAGLTG  | 544.2726 | 572.2675 | DA       | 159.0764 | 187.0713 | DAG      | 216.0979 | 244.0928 |
| DAGL     | 329.1819 | 357.1769 | DAGLT    | 430.2296 | 458.2245 | DAGLTG   | 487.2511 | 515.2460 |
| AG       | 101.0709 | 129.0659 | AGL      | 214.1550 | 242.1499 | AGLT     | 315.2027 | 343.1976 |
| AGLTG    | 372.2241 | 400.2191 | GL       | 143.1179 | 171.1128 | GLT      | 244.1656 | 272.1605 |
| GLTG     | 301.1870 | 329.1819 | LT       | 187.1441 | 215.1390 | LTG      | 244.1656 | 272.1605 |
| TG       | 131.0815 | 159.0764 |          |          |          |          |          |          |

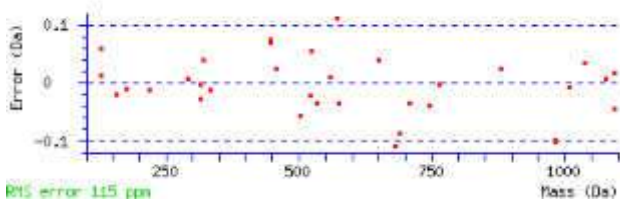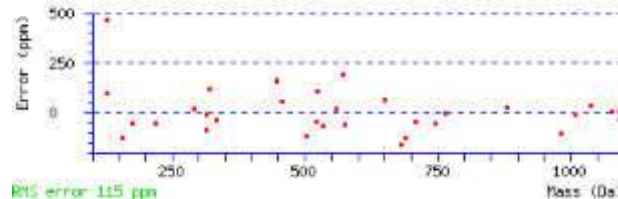

NCBI BLAST search of [FVIGGPHGDAGLTGR](#)

(Parameters: blastp, nr protein database, expect=20000, no filter, PAM30)

Other BLAST [web gateways](#)

#### All matches to this query

| Score | Mr(calc)  | Delta   | Sequence                        |
|-------|-----------|---------|---------------------------------|
| 45.6  | 1452.7474 | 0.0628  | <a href="#">FVIGGPHGDAGLTGR</a> |
| 45.6  | 1452.7474 | 0.0628  | <a href="#">FVIGGPHGDAGLTGR</a> |
| 16.8  | 1452.7586 | 0.0516  | <a href="#">GVWLGAQPAADRGR</a>  |
| 14.0  | 1452.7209 | 0.0894  | <a href="#">TSDLYKGDANTLR</a>   |
| 12.7  | 1452.7143 | 0.0959  | <a href="#">RFSSTLSAPACR</a>    |
| 12.7  | 1452.8161 | -0.0058 | <a href="#">RLLLAGQQAAAADR</a>  |
| 12.7  | 1452.7950 | 0.0153  | <a href="#">RPPYPAPTAATTR</a>   |
| 12.7  | 1452.7950 | 0.0153  | <a href="#">RPSGQQLLAAWR</a>    |
| 12.3  | 1452.7433 | 0.0669  | <a href="#">SSNAPAAPSPATARR</a> |
| 11.2  | 1452.6966 | 0.1137  | <a href="#">DRAMQLMTAFNR</a>    |

Mascot: <http://www.matrixscience.com/>


**Mascot Search Results**
**Peptide View** Spot no 73

 MS/MS Fragmentation of **FHNIYGPFGTWK**

 Found in **gi|110289082** in **NCBI**nr, NAD dependent epimerase/dehydratase family protein, expressed [Oryza sativa Japonica Group]

Match to Query 57: 1465.807224 from(1466.814500,1+) intensity(0.0000) index(18)

Title: Label: P7, Spot\_Id: 228953, Peak\_List\_Id: 257728, MSMS Job\_Run\_Id: 24933, Comment:

Data file ppw\_P7\_138985142500.txt

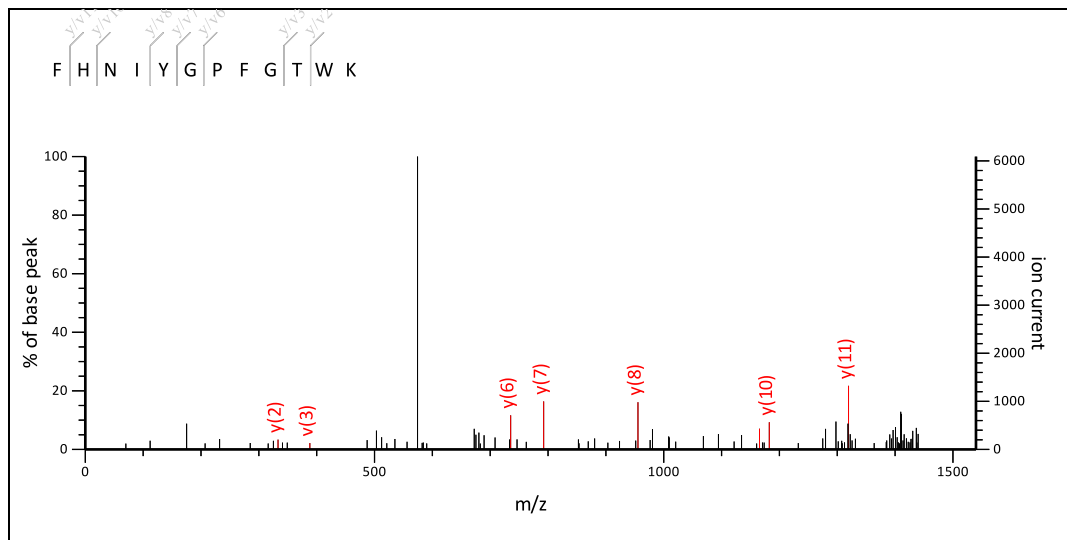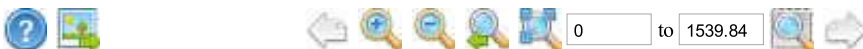
 Label all possible matches  Label matches used for scoring 

Monoisotopic mass of neutral peptide Mr(calc): 1465.7143

Fixed modifications: Carbamidomethyl (C) (apply to specified residues or termini only)

Ions Score: 33 Expect: 1.1

 Matches : 8/180 fragment ions using 14 most intense peaks ([help](#))

| #  | Immon.   | a         | a*        | a <sup>0</sup> | b         | b*        | b <sup>0</sup> | d         | d'        | Seq. | v         | w         | w'        | y         | y*        |
|----|----------|-----------|-----------|----------------|-----------|-----------|----------------|-----------|-----------|------|-----------|-----------|-----------|-----------|-----------|
| 1  | 120.0808 | 120.0808  |           |                | 148.0757  |           |                | 44.0495   |           | F    |           |           |           |           |           |
| 2  | 110.0713 | 257.1397  |           |                | 285.1346  |           |                |           |           | H    | 1237.6000 |           |           | 1319.6531 | 1302.6266 |
| 3  | 87.0553  | 371.1826  | 354.1561  |                | 399.1775  | 382.1510  |                | 328.1768  |           | N    | 1123.5571 | 1122.5619 |           | 1182.5942 | 1165.5677 |
| 4  | 86.0964  | 484.2667  | 467.2401  |                | 512.2616  | 495.2350  |                | 456.2354  | 470.2510  | I    | 1010.4730 | 1023.4934 | 1037.5091 | 1068.5513 | 1051.5247 |
| 5  | 136.0757 | 647.3300  | 630.3035  |                | 675.3249  | 658.2984  |                |           |           | Y    | 847.4097  |           |           | 955.4672  | 938.4407  |
| 6  | 30.0338  | 704.3515  | 687.3249  |                | 732.3464  | 715.3198  |                |           |           | G    |           |           |           | 792.4039  | 775.3774  |
| 7  | 70.0651  | 801.4042  | 784.3777  |                | 829.3992  | 812.3726  |                | 775.3886  |           | P    | 693.3355  | 692.3402  |           | 735.3824  | 718.3559  |
| 8  | 120.0808 | 948.4726  | 931.4461  |                | 976.4676  | 959.4410  |                |           |           | F    | 546.2671  |           |           | 638.3297  | 621.3031  |
| 9  | 30.0338  | 1005.4941 | 988.4676  |                | 1033.4890 | 1016.4625 |                |           |           | G    |           |           |           | 491.2613  | 474.2347  |
| 10 | 74.0600  | 1106.5418 | 1089.5152 | 1088.5312      | 1134.5367 | 1117.5102 | 1116.5261      | 1090.5469 | 1092.5261 | T    | 388.1979  | 401.2183  | 403.1976  | 434.2398  | 417.2132  |
| 11 | 159.0917 | 1292.6211 | 1275.5946 | 1274.6105      | 1320.6160 | 1303.5895 | 1302.6055      |           |           | W    | 202.1186  |           |           | 333.1921  | 316.1656  |
| 12 | 101.1073 |           |           |                |           |           |                |           |           | K    | 74.0237   | 73.0284   |           | 147.1128  | 130.0863  |

| Seq    | ya       | yb       | Seq    | ya       | yb       | Seq    | ya       | yb       |
|--------|----------|----------|--------|----------|----------|--------|----------|----------|
| HN     | 224.1142 | 252.1091 | HNI    | 337.1983 | 365.1932 | HNIY   | 500.2616 | 528.2565 |
| HNIYG  | 557.2831 | 585.2780 | HNIYGP | 654.3358 | 682.3307 | NI     | 200.1394 | 228.1343 |
| NIY    | 363.2027 | 391.1976 | NIYG   | 420.2241 | 448.2191 | NIYGP  | 517.2769 | 545.2718 |
| NIYGPF | 664.3453 | 692.3402 | IY     | 249.1598 | 277.1547 | IYG    | 306.1812 | 334.1761 |
| IYGP   | 403.2340 | 431.2289 | IYGP   | 550.3024 | 578.2973 | IYGPFG | 607.3239 | 635.3188 |
| YG     | 193.0972 | 221.0921 | YGP    | 290.1499 | 318.1448 | YGPFG  | 437.2183 | 465.2132 |
| YGPFG  | 494.2398 | 522.2347 | YGPFGT | 595.2875 | 623.2824 | GP     | 127.0866 | 155.0815 |
| GPF    | 274.1550 | 302.1499 | GPF    | 331.1765 | 359.1714 | GPFGT  | 432.2241 | 460.2191 |
| GPFGTW | 618.3035 | 646.2984 | PF     | 217.1335 | 245.1285 | PFG    | 274.1550 | 302.1499 |

|             |          |          |              |          |          |           |          |          |
|-------------|----------|----------|--------------|----------|----------|-----------|----------|----------|
| <b>PFGT</b> | 375.2027 | 403.1976 | <b>PFGTW</b> | 561.2820 | 589.2769 | <b>FG</b> | 177.1022 | 205.0972 |
| <b>FGT</b>  | 278.1499 | 306.1448 | <b>FGTW</b>  | 464.2292 | 492.2241 | <b>GT</b> | 131.0815 | 159.0764 |
| <b>GTW</b>  | 317.1608 | 345.1557 | <b>TW</b>    | 260.1394 | 288.1343 |           |          |          |

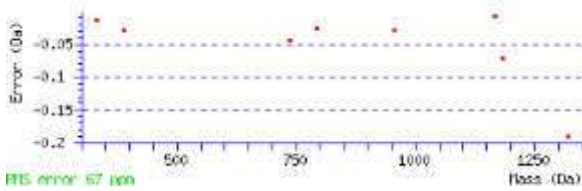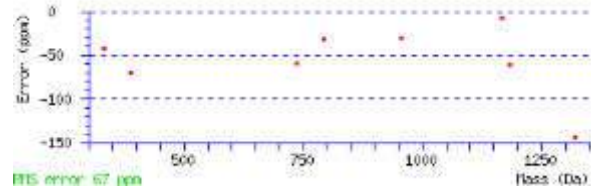

NCBI BLAST search of [FHNIYGPFGTWK](#)

(Parameters: blastp, nr protein database, expect=20000, no filter, PAM30)

Other BLAST [web gateways](#)

#### All matches to this query

| Score | Mr(calc)  | Delta   | Sequence                       |
|-------|-----------|---------|--------------------------------|
| 33.4  | 1465.7143 | 0.0929  | <a href="#">FHNIYGPFGTWK</a>   |
| 21.9  | 1465.6766 | 0.1306  | <a href="#">MTAERACGAVAGTR</a> |
| 16.5  | 1465.8188 | -0.0115 | <a href="#">AGGVCVLHVAISKR</a> |
| 14.9  | 1465.6871 | 0.1201  | <a href="#">GYLPPMDESKSAR</a>  |
| 14.6  | 1465.8001 | 0.0071  | <a href="#">TSLPLPEGROVNR</a>  |
| 13.5  | 1465.6797 | 0.1275  | <a href="#">DSLGDYNKDANVR</a>  |
| 12.9  | 1465.6983 | 0.1089  | <a href="#">EIKCAAFNAEGTR</a>  |
| 12.7  | 1465.7096 | 0.0976  | <a href="#">GINSDRAFGTCLR</a>  |
| 10.9  | 1465.8113 | -0.0041 | <a href="#">RPRLSGPEALGTGR</a> |
| 10.5  | 1465.7565 | 0.0507  | <a href="#">GVKDSLYTELWR</a>   |

Mascot: <http://www.matrixscience.com/>


**Mascot Search Results**
**Peptide View** **Spot no 73**
**MS/MS Fragmentation of ISITGAGGFISHIAR**

 Found in **gi110289082** in **NCBI**, NAD dependent epimerase/dehydratase family protein, expressed [Oryza sativa Japonica Group]

Match to Query 66: 1555.982824 from(1556.990100,1+) intensity(0.0000) index(20)

Title: Label: P7, Spot\_Id: 228953, Peak\_List\_Id: 257722, MSMS Job\_Run\_Id: 24933, Comment:

Data file ppw\_P7\_138985142500.txt

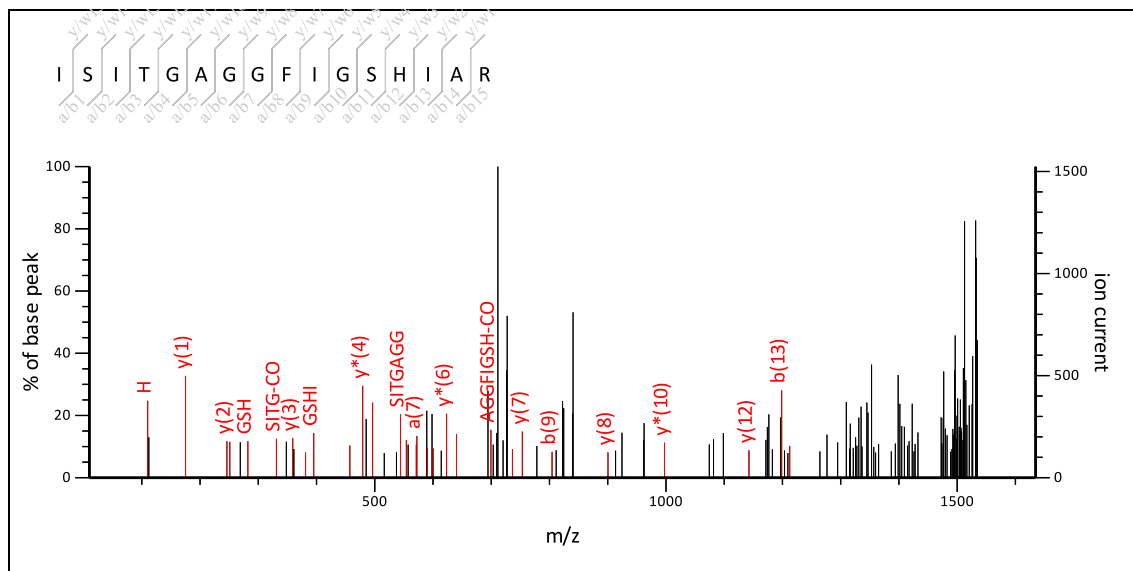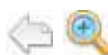

10.08 to 1634.59

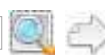
 Label all possible matches  Label matches used for scoring 

 Monoisotopic mass of neutral peptide **Mr(calc)**: 1555.8471

Fixed modifications: Carbamidomethyl (C) (apply to specified residues or termini only)

Ions Score: 15 Expect: 22

 Matches : 31/280 fragment ions using 96 most intense peaks ([help](#))

| #  | Immon.   | a         | a <sup>0</sup> | b         | b <sup>0</sup> | d         | d'        | Seq. | v         | w         | w'        | y         | y*        | y <sup>0</sup> | #  |
|----|----------|-----------|----------------|-----------|----------------|-----------|-----------|------|-----------|-----------|-----------|-----------|-----------|----------------|----|
| 1  | 86.0964  | 86.0964   |                | 114.0913  |                | 44.0495   |           | I    |           |           |           |           |           |                | 16 |
| 2  | 60.0444  | 173.1285  | 155.1179       | 201.1234  | 183.1128       | 157.1335  |           | S    | 1411.7441 | 1410.7488 |           | 1443.7703 | 1426.7437 | 1425.7597      | 15 |
| 3  | 86.0964  | 286.2125  | 268.2020       | 314.2074  | 296.1969       | 258.1812  | 272.1969  | I    | 1298.6600 | 1311.6804 | 1325.6961 | 1356.7383 | 1339.7117 | 1338.7277      | 14 |
| 4  | 74.0600  | 387.2602  | 369.2496       | 415.2551  | 397.2445       | 371.2653  | 373.2445  | T    | 1197.6123 | 1210.6327 | 1212.6120 | 1243.6542 | 1226.6276 | 1225.6436      | 13 |
| 5  | 30.0338  | 444.2817  | 426.2711       | 472.2766  | 454.2660       |           |           | G    |           |           |           | 1142.6065 | 1125.5800 | 1124.5960      | 12 |
| 6  | 44.0495  | 515.3188  | 497.3082       | 543.3137  | 525.3031       |           |           | A    | 1069.5538 |           |           | 1085.5851 | 1068.5585 | 1067.5745      | 11 |
| 7  | 30.0338  | 572.3402  | 554.3297       | 600.3352  | 582.3246       |           |           | G    |           |           |           | 1014.5479 | 997.5214  | 996.5374       | 10 |
| 8  | 30.0338  | 629.3617  | 611.3511       | 657.3566  | 639.3461       |           |           | G    |           |           |           | 957.5265  | 940.4999  | 939.5159       | 9  |
| 9  | 120.0808 | 776.4301  | 758.4196       | 804.4250  | 786.4145       |           |           | F    | 808.4424  |           |           | 900.5050  | 883.4785  | 882.4944       | 8  |
| 10 | 86.0964  | 889.5142  | 871.5036       | 917.5091  | 899.4985       | 861.4829  | 875.4985  | I    | 695.3583  | 708.3787  | 722.3944  | 753.4366  | 736.4100  | 735.4260       | 7  |
| 11 | 30.0338  | 946.5356  | 928.5251       | 974.5306  | 956.5200       |           |           | G    |           |           |           | 640.3525  | 623.3260  | 622.3420       | 6  |
| 12 | 60.0444  | 1033.5677 | 1015.5571      | 1061.5626 | 1043.5520      | 1017.5728 |           | S    | 551.3049  | 550.3096  |           | 583.3311  | 566.3045  | 565.3205       | 5  |
| 13 | 110.0713 | 1170.6266 | 1152.6160      | 1198.6215 | 1180.6109      |           |           | H    | 414.2459  |           |           | 496.2990  | 479.2725  |                | 4  |
| 14 | 86.0964  | 1283.7106 | 1265.7001      | 1311.7056 | 1293.6950      | 1255.6793 | 1269.6950 | I    | 301.1619  | 314.1823  | 328.1979  | 359.2401  | 342.2136  |                | 3  |
| 15 | 44.0495  | 1354.7478 | 1336.7372      | 1382.7427 | 1364.7321      |           |           | A    | 230.1248  |           |           | 246.1561  | 229.1295  |                | 2  |
| 16 | 129.1135 |           |                |           |                |           |           | R    | 74.0237   | 73.0284   |           | 175.1190  | 158.0924  |                | 1  |

| Seq   | ya       | yb       | Seq    | ya       | yb       | Seq     | ya       | yb       |
|-------|----------|----------|--------|----------|----------|---------|----------|----------|
| SI    | 173.1285 | 201.1234 | SIT    | 274.1761 | 302.1710 | SITG    | 331.1976 | 359.1925 |
| SITGA | 402.2347 | 430.2296 | SITGAG | 459.2562 | 487.2511 | SITGAGG | 516.2776 | 544.2726 |

|          |          |          |          |          |          |          |          |          |
|----------|----------|----------|----------|----------|----------|----------|----------|----------|
| SITGAGGF | 663.3461 | 691.3410 | IT       | 187.1441 | 215.1390 | ITG      | 244.1656 | 272.1605 |
| ITGA     | 315.2027 | 343.1976 | ITGAG    | 372.2241 | 400.2191 | ITGAGG   | 429.2456 | 457.2405 |
| ITGAGGF  | 576.3140 | 604.3089 | ITGAGGFI | 689.3981 | 717.3930 | TG       | 131.0815 | 159.0764 |
| TGA      | 202.1186 | 230.1135 | TGAG     | 259.1401 | 287.1350 | TGAGG    | 316.1615 | 344.1565 |
| TGAGGF   | 463.2300 | 491.2249 | TGAGGFI  | 576.3140 | 604.3089 | TGAGGFIG | 633.3355 | 661.3304 |
| GA       | 101.0709 | 129.0659 | GAG      | 158.0924 | 186.0873 | GAGG     | 215.1139 | 243.1088 |
| GAGGF    | 362.1823 | 390.1772 | GAGGFI   | 475.2663 | 503.2613 | GAGGFIG  | 532.2878 | 560.2827 |
| GAGGFIGS | 619.3198 | 647.3148 | AG       | 101.0709 | 129.0659 | AGG      | 158.0924 | 186.0873 |
| AGGF     | 305.1608 | 333.1557 | AGGFI    | 418.2449 | 446.2398 | AGGFIG   | 475.2663 | 503.2613 |
| AGGFIGS  | 562.2984 | 590.2933 | AGGFIGSH | 699.3573 | 727.3522 | GG       | 87.0553  | 115.0502 |
| GGF      | 234.1237 | 262.1186 | GGFI     | 347.2078 | 375.2027 | GGFIG    | 404.2292 | 432.2241 |
| GGFIGS   | 491.2613 | 519.2562 | GGFIGSH  | 628.3202 | 656.3151 | GF       | 177.1022 | 205.0972 |
| GFI      | 290.1863 | 318.1812 | GFIG     | 347.2078 | 375.2027 | GFIGS    | 434.2398 | 462.2347 |
| GFIGSH   | 571.2987 | 599.2936 | GFIGSHI  | 684.3828 | 712.3777 | FI       | 233.1648 | 261.1598 |
| FIG      | 290.1863 | 318.1812 | FIGS     | 377.2183 | 405.2132 | FIGSH    | 514.2772 | 542.2722 |
| FIGSHI   | 627.3613 | 655.3562 | FIGSHIA  | 698.3984 | 726.3933 | IG       | 143.1179 | 171.1128 |
| IGS      | 230.1499 | 258.1448 | IGSH     | 367.2088 | 395.2037 | IGSHI    | 480.2929 | 508.2878 |
| IGSHIA   | 551.3300 | 579.3249 | GS       | 117.0659 | 145.0608 | GSH      | 254.1248 | 282.1197 |
| GSHI     | 367.2088 | 395.2037 | GSHIA    | 438.2459 | 466.2409 | SH       | 197.1033 | 225.0982 |
| SHI      | 310.1874 | 338.1823 | SHIA     | 381.2245 | 409.2194 | HI       | 223.1553 | 251.1503 |
| HIA      | 294.1925 | 322.1874 | IA       | 157.1335 | 185.1285 |          |          |          |

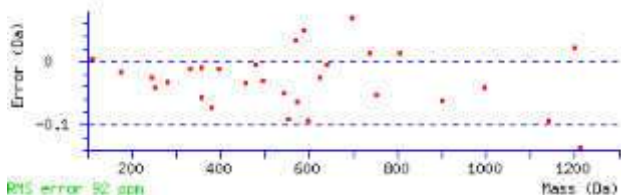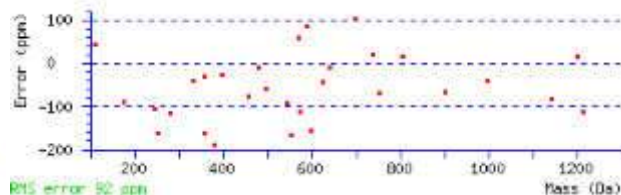

NCBI BLAST search of [ISITGAGGFIGSHIAR](#)  
 (Parameters: blastp, nr protein database, expect=20000, no filter, PAM30)  
 Other BLAST [web gateways](#)

All matches to this query

| Score | Mr(calc)  | Delta  | Sequence                         |
|-------|-----------|--------|----------------------------------|
| 15.0  | 1555.8471 | 0.1357 | <a href="#">ISITGAGGFIGSHIAR</a> |
| 13.6  | 1555.8504 | 0.1324 | <a href="#">TGSRLRIMSLPPASAR</a> |
| 6.8   | 1555.8331 | 0.1497 | <a href="#">HIPHIQITDRNGR</a>    |
| 5.3   | 1555.8430 | 0.1398 | <a href="#">SSALNAATLGVSGPRR</a> |
| 5.1   | 1555.8457 | 0.1371 | <a href="#">DSSVSIQIEIVPAAK</a>  |
| 5.0   | 1555.8947 | 0.0881 | <a href="#">VLGHDGGVPPRLLAR</a>  |
| 4.0   | 1555.8293 | 0.1535 | <a href="#">VMGLAPGLEATWRR</a>   |
| 3.2   | 1555.8471 | 0.1358 | <a href="#">TKGSLVNYTPLHAR</a>   |
| 3.2   | 1555.8293 | 0.1536 | <a href="#">MHKYSPNLLAR</a>      |
| 3.1   | 1555.8471 | 0.1357 | <a href="#">VSITGAGGFIASHIAR</a> |

Mascot: <http://www.matrixscience.com/>


**Mascot Search Results**
**Peptide View Spot no 73**
MS/MS Fragmentation of **SFTFIDECV EGVLR**Found in **gi110289082** in **NCBIInr**, NAD dependent epimerase/dehydratase family protein, expressed [Oryza sativa Japonica Group]

Match to Query 72: 1670.932624 from(1671.939900,1+) intensity(0.0000) index(23)

Title: Label: P7, Spot\_Id: 228953, Peak\_List\_Id: 257730, MSMS Job\_Run\_Id: 24933, Comment:

Data file ppw\_P7\_138985142500.txt

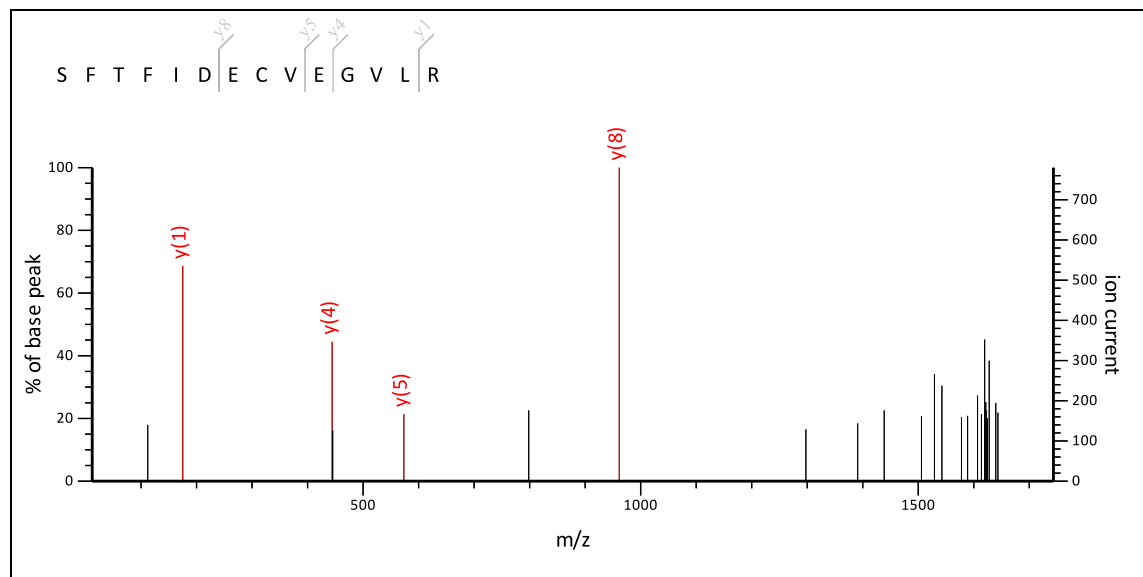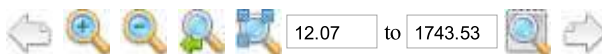Label all possible matches  Label matches used for scoring Monoisotopic mass of neutral peptide  $M_r(\text{calc})$ : 1670.7974

Fixed modifications: Carbamidomethyl (C) (apply to specified residues or termini only)

Ions Score: 15 Expect: 58

Matches : 4/219 fragment ions using 10 most intense peaks ([help](#))

| #  | Immon.   | a         | a <sup>0</sup> | b         | b <sup>0</sup> | d         | d'       | Seq. | v         | w         | w'        | y         | y*        | y <sup>0</sup> | #  |
|----|----------|-----------|----------------|-----------|----------------|-----------|----------|------|-----------|-----------|-----------|-----------|-----------|----------------|----|
| 1  | 60.0444  | 60.0444   | 42.0338        | 88.0393   | 70.0287        | 44.0495   |          | S    |           |           |           |           |           |                | 14 |
| 2  | 120.0808 | 207.1128  | 189.1022       | 235.1077  | 217.0972       |           |          | F    | 1492.7101 |           |           | 1584.7727 | 1567.7461 | 1566.7621      | 13 |
| 3  | 74.0600  | 308.1605  | 290.1499       | 336.1554  | 318.1448       | 292.1656  | 294.1448 | T    | 1391.6624 | 1404.6828 | 1406.6620 | 1437.7042 | 1420.6777 | 1419.6937      | 12 |
| 4  | 120.0808 | 455.2289  | 437.2183       | 483.2238  | 465.2132       |           |          | F    | 1244.5940 |           |           | 1336.6566 | 1319.6300 | 1318.6460      | 11 |
| 5  | 86.0964  | 568.3130  | 550.3024       | 596.3079  | 578.2973       | 540.2817  | 554.2973 | I    | 1131.5099 | 1144.5303 | 1158.5460 | 1189.5881 | 1172.5616 | 1171.5776      | 10 |
| 6  | 88.0393  | 683.3399  | 665.3293       | 711.3348  | 693.3243       | 639.3501  |          | D    | 1016.4830 | 1015.4877 |           | 1076.5041 | 1059.4775 | 1058.4935      | 9  |
| 7  | 102.0550 | 812.3825  | 794.3719       | 840.3774  | 822.3668       | 754.3770  |          | E    | 887.4404  | 886.4451  |           | 961.4771  | 944.4506  | 943.4666       | 8  |
| 8  | 133.0430 | 972.4131  | 954.4026       | 1000.4081 | 982.3975       | 883.4196  |          | C    | 727.4097  | 726.4145  |           | 832.4345  | 815.4080  | 814.4240       | 7  |
| 9  | 72.0808  | 1071.4816 | 1053.4710      | 1099.4765 | 1081.4659      | 1057.4659 |          | V    | 628.3413  | 641.3617  |           | 672.4039  | 655.3774  | 654.3933       | 6  |
| 10 | 102.0550 | 1200.5242 | 1182.5136      | 1228.5191 | 1210.5085      | 1142.5187 |          | E    | 499.2987  | 498.3035  |           | 573.3355  | 556.3089  | 555.3249       | 5  |
| 11 | 30.0338  | 1257.5456 | 1239.5351      | 1285.5405 | 1267.5300      |           |          | G    |           |           |           | 444.2929  | 427.2663  |                | 4  |
| 12 | 72.0808  | 1356.6140 | 1338.6035      | 1384.6089 | 1366.5984      | 1342.5984 |          | V    | 343.2088  | 356.2292  |           | 387.2714  | 370.2449  |                | 3  |
| 13 | 86.0964  | 1469.6981 | 1451.6875      | 1497.6930 | 1479.6824      | 1427.6511 |          | L    | 230.1248  | 229.1295  |           | 288.2030  | 271.1765  |                | 2  |
| 14 | 129.1135 |           |                |           |                |           |          | R    | 74.0237   | 73.0284   |           | 175.1190  | 158.0924  |                | 1  |

| Seq   | ya       | yb       | Seq   | ya       | yb       | Seq  | ya       | yb       |
|-------|----------|----------|-------|----------|----------|------|----------|----------|
| FT    | 221.1285 | 249.1234 | FTF   | 368.1969 | 396.1918 | FTFI | 481.2809 | 509.2758 |
| FTFID | 596.3079 | 624.3028 | TF    | 221.1285 | 249.1234 | TFI  | 334.2125 | 362.2074 |
| TFID  | 449.2395 | 477.2344 | TFIDE | 578.2821 | 606.2770 | FI   | 233.1648 | 261.1598 |

|               |          |          |               |          |          |               |          |          |
|---------------|----------|----------|---------------|----------|----------|---------------|----------|----------|
| <b>FID</b>    | 348.1918 | 376.1867 | <b>FIDE</b>   | 477.2344 | 505.2293 | <b>FIDEC</b>  | 637.2650 | 665.2599 |
| <b>ID</b>     | 201.1234 | 229.1183 | <b>IDE</b>    | 330.1660 | 358.1609 | <b>IDEC</b>   | 490.1966 | 518.1915 |
| <b>IDECV</b>  | 589.2650 | 617.2599 | <b>DE</b>     | 217.0819 | 245.0768 | <b>DEC</b>    | 377.1125 | 405.1075 |
| <b>DECV</b>   | 476.1810 | 504.1759 | <b>DECVE</b>  | 605.2236 | 633.2185 | <b>DECVEG</b> | 662.2450 | 690.2399 |
| <b>EC</b>     | 262.0856 | 290.0805 | <b>ECV</b>    | 361.1540 | 389.1489 | <b>ECVE</b>   | 490.1966 | 518.1915 |
| <b>ECVEG</b>  | 547.2181 | 575.2130 | <b>ECVEGV</b> | 646.2865 | 674.2814 | <b>CV</b>     | 232.1114 | 260.1063 |
| <b>CVE</b>    | 361.1540 | 389.1489 | <b>CVEG</b>   | 418.1755 | 446.1704 | <b>CVEGV</b>  | 517.2439 | 545.2388 |
| <b>CVEGVL</b> | 630.3280 | 658.3229 | <b>VE</b>     | 201.1234 | 229.1183 | <b>VEG</b>    | 258.1448 | 286.1397 |
| <b>VEGV</b>   | 357.2132 | 385.2082 | <b>VEGVL</b>  | 470.2973 | 498.2922 | <b>EG</b>     | 159.0764 | 187.0713 |
| <b>EGV</b>    | 258.1448 | 286.1397 | <b>EGVL</b>   | 371.2289 | 399.2238 | <b>GV</b>     | 129.1022 | 157.0972 |
| <b>GVL</b>    | 242.1863 | 270.1812 | <b>VL</b>     | 185.1648 | 213.1598 |               |          |          |

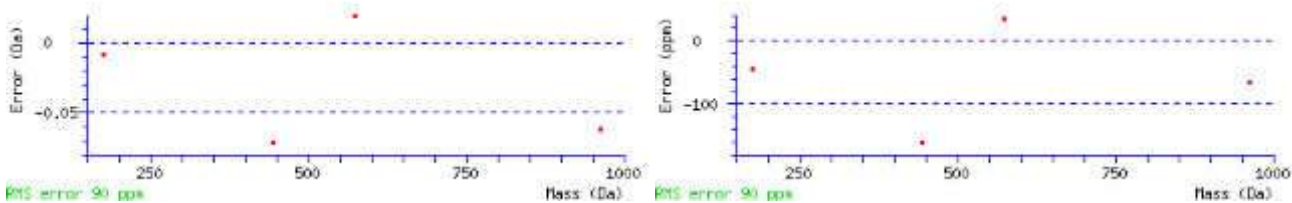

NCBI BLAST search of [SETFIDECVEGVLR](#)

(Parameters: blastp, nr protein database, expect=20000, no filter, PAM30)

Other BLAST [web gateways](#)

#### All matches to this query

| Score | Mr(calc)  | Delta   | Sequence                         |
|-------|-----------|---------|----------------------------------|
| 15.4  | 1670.7974 | 0.1352  | <a href="#">SETFIDECVEGVLR</a>   |
| 10.9  | 1670.9315 | 0.0011  | <a href="#">RAVVATLSVIGDDVTR</a> |
| 10.4  | 1670.8773 | 0.0553  | <a href="#">KPMSEPKNTITAOAR</a>  |
| 10.2  | 1670.9104 | 0.0223  | <a href="#">KFVNLPEISAAGQAAR</a> |
| 9.5   | 1670.9468 | -0.0141 | <a href="#">KSANLSSWKPLVVSER</a> |
| 9.3   | 1670.8886 | 0.0440  | <a href="#">MGOIGVLTGNAGEIRR</a> |
| 8.7   | 1670.8773 | 0.0553  | <a href="#">KPMSEPKNTITAOAR</a>  |
| 6.7   | 1670.7900 | 0.1426  | <a href="#">YSYEPASRVDEISR</a>   |
| 6.1   | 1670.9032 | 0.0294  | <a href="#">LFPSKDSVFYILSR</a>   |
| 6.1   | 1670.7835 | 0.1492  | <a href="#">MPSSYEIFQONRR</a>    |

Mascot: <http://www.matrixscience.com/>





# Mascot Search Results

## Peptide View Spot no 74

### MS/MS Fragmentation of **VYDDEV R**

Found in **gi|8918361** in **NCBIInr**, RuBisCO activase small isoform precursor [Oryza sativa]

Match to Query 2: 894.452744 from(895.460020,1+) intensity(0.0000) index(0)

Title: Label: L1, Spot\_Id: 219685, Peak\_List\_Id: 225099, MSMS Job\_Run\_Id: 21764, Comment:

Data file C:\Documents and Settings\Administrator\Desktop\farah BHU\spot set plate\Farah-Garima 11May 2013\ppw\_L1\_136842039200.txt

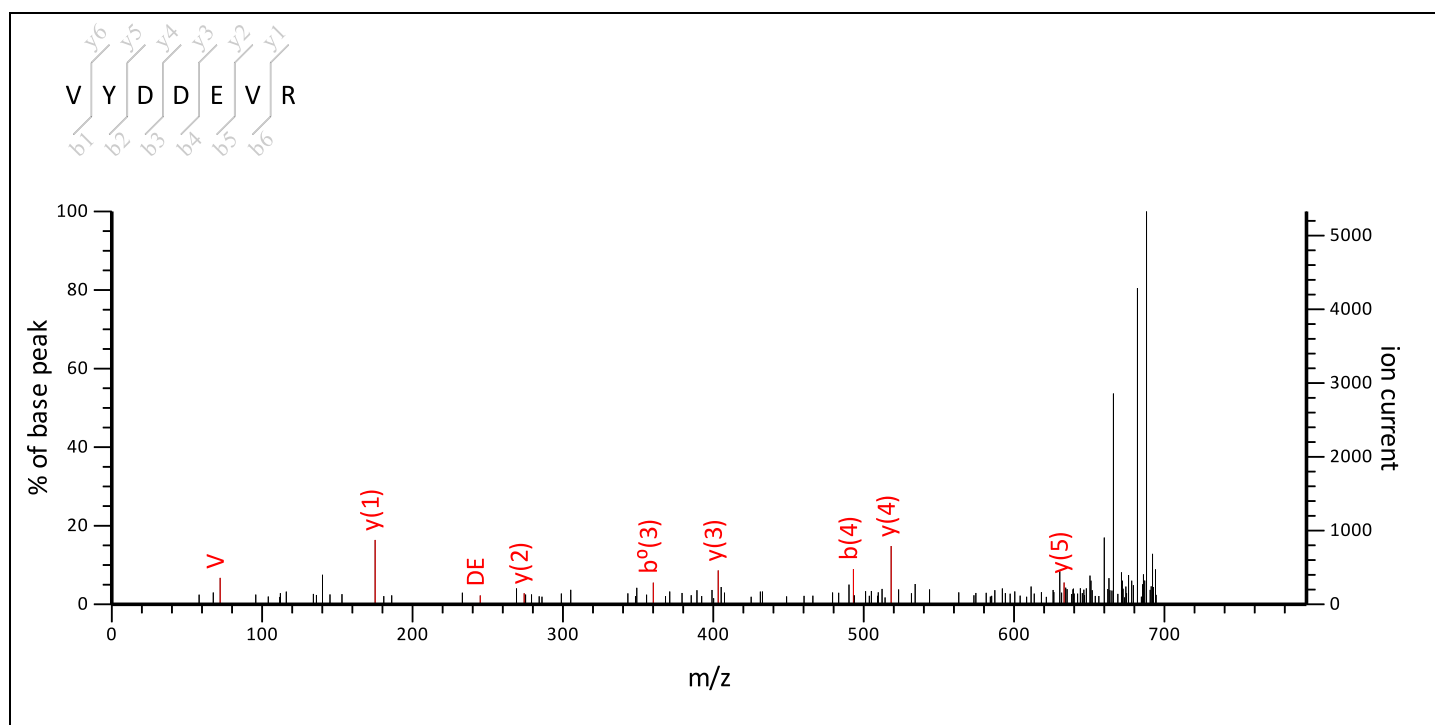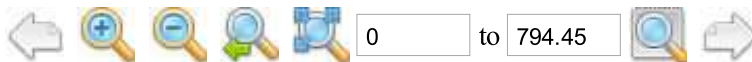

Label all possible matches  Label matches used for scoring

**Monoisotopic mass of neutral peptide Mr(calc):** 894.4083

**Fixed modifications:** Carbamidomethyl (C) (apply to specified residues or termini only)

**Ions Score:** 14 **Expect:** 88

**Matches :** 12/79 fragment ions using 28 most intense peaks ([help](#))

| # | Immon.   | a        | a <sup>0</sup> | b        | b <sup>0</sup> | d        | Seq. | v        | w        | y        | y*       | y <sup>0</sup> | # |
|---|----------|----------|----------------|----------|----------------|----------|------|----------|----------|----------|----------|----------------|---|
| 1 | 72.0808  | 72.0808  |                | 100.0757 |                | 44.0495  | V    |          |          |          |          |                | 7 |
| 2 | 136.0757 | 235.1441 |                | 263.1390 |                |          | Y    | 688.2897 |          | 796.3472 | 779.3206 | 778.3366       | 6 |
| 3 | 88.0393  | 350.1710 | 332.1605       | 378.1660 | 360.1554       | 306.1812 | D    | 573.2627 | 572.2675 | 633.2838 | 616.2573 | 615.2733       | 5 |
| 4 | 88.0393  | 465.1980 | 447.1874       | 493.1929 | 475.1823       | 421.2082 | D    | 458.2358 | 457.2405 | 518.2569 | 501.2304 | 500.2463       | 4 |
| 5 | 102.0550 | 594.2406 | 576.2300       | 622.2355 | 604.2249       | 536.2351 | E    | 329.1932 | 328.1979 | 403.2300 | 386.2034 | 385.2194       | 3 |
| 6 | 72.0808  | 693.3090 | 675.2984       | 721.3039 | 703.2933       | 679.2933 | V    | 230.1248 | 243.1452 | 274.1874 | 257.1608 |                | 2 |
| 7 | 129.1135 |          |                |          |                |          | R    | 74.0237  | 73.0284  | 175.1190 | 158.0924 |                | 1 |

| Seq          | ya       | yb       | Seq        | ya       | yb              | Seq         | ya       | yb              |
|--------------|----------|----------|------------|----------|-----------------|-------------|----------|-----------------|
| <b>YD</b>    | 251.1026 | 279.0975 | <b>YDD</b> | 366.1296 | 394.1245        | <b>YDDE</b> | 495.1722 | 523.1671        |
| <b>YDDEV</b> | 594.2406 | 622.2355 | <b>DD</b>  | 203.0662 | 231.0612        | <b>DDE</b>  | 332.1088 | <b>360.1038</b> |
| <b>DDEV</b>  | 431.1773 | 459.1722 | <b>DE</b>  | 217.0819 | <b>245.0768</b> | <b>DEV</b>  | 316.1503 | 344.1452        |
| <b>EV</b>    | 201.1234 | 229.1183 |            |          |                 |             |          |                 |

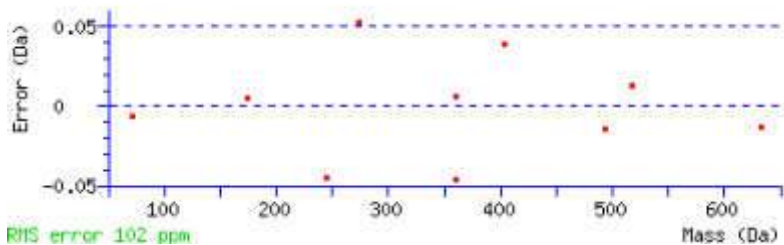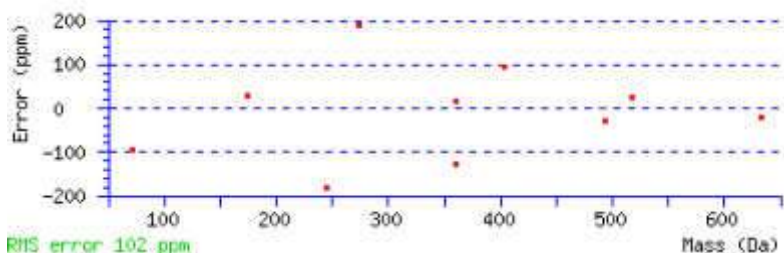

NCBI **BLAST** search of [VYDDEV](#)

(Parameters: blastp, nr protein database, expect=20000, no filter, PAM30)

Other BLAST [web gateways](#)

#### All matches to this query

| Score | Mr(calc) | Delta  | Sequence                |
|-------|----------|--------|-------------------------|
| 14.9  | 894.3905 | 0.0622 | <a href="#">YVDDMPR</a> |
| 14.0  | 894.4083 | 0.0444 | <a href="#">VYDDEV</a>  |
| 8.9   | 894.3719 | 0.0808 | <a href="#">FDDEDV</a>  |
| 7.1   | 894.4269 | 0.0258 | <a href="#">FDVMDLR</a> |
| 6.9   | 894.3719 | 0.0808 | <a href="#">DDFDLDR</a> |
| 6.9   | 894.4083 | 0.0444 | <a href="#">EFTDEV</a>  |
| 6.9   | 894.4083 | 0.0444 | <a href="#">ETFDDL</a>  |
| 6.9   | 894.4447 | 0.0081 | <a href="#">LYTDVER</a> |
| 6.9   | 894.4447 | 0.0081 | <a href="#">TYLDVER</a> |
| 6.3   | 894.4083 | 0.0444 | <a href="#">DFETEVR</a> |

Mascot: <http://www.matrixscience.com/>



# Mascot Search Results

## Peptide View **Spot no 74**

### MS/MS Fragmentation of **VYDDEV**RK

Found in **gi|8918361** in **NCBI**nr, RuBisCO activase small isoform precursor [Oryza sativa]

Match to Query 14: 1022.514624 from(1023.521900,1+) intensity(0.0000) index(5)

Title: Label: L1, Spot\_Id: 219685, Peak\_List\_Id: 225084, MSMS Job\_Run\_Id: 21764, Comment:

Data file C:\Documents and Settings\Administrator\Desktop\farah BHU\spot set plate\Farah-Garima 11May 2013\ppw\_L1\_136842039200.txt

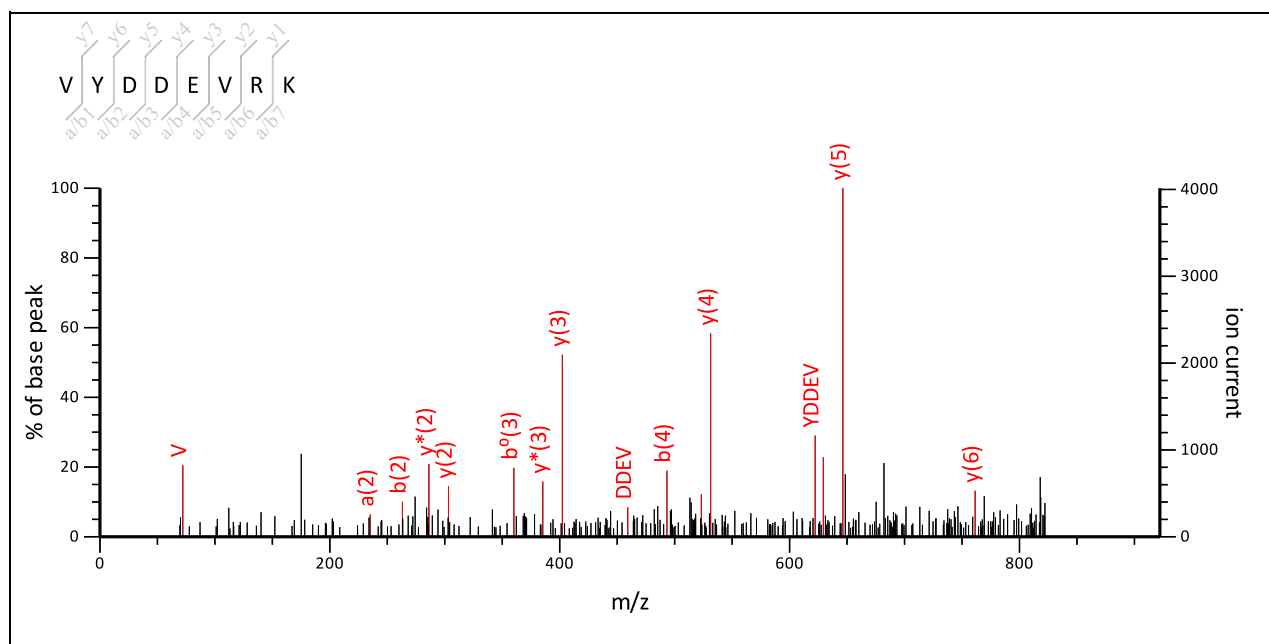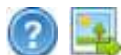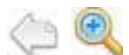

0 to 922.13

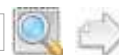

Label all possible matches  Label matches used for scoring

**Monoisotopic mass of neutral peptide Mr(calc):** 1022.5033

**Fixed modifications:** Carbamidomethyl (C) (apply to specified residues or termini only)

**Ions Score:** 31 **Expect:** 1.7

**Matches :** 21/99 fragment ions using 24 most intense peaks ([help](#))

| # | Immon.   | a        | a*       | a <sup>0</sup> | b        | b*       | b <sup>0</sup> | d        | Seq. | v        | w        | y        | y*       | y <sup>0</sup> | # |
|---|----------|----------|----------|----------------|----------|----------|----------------|----------|------|----------|----------|----------|----------|----------------|---|
| 1 | 72.0808  | 72.0808  |          |                | 100.0757 |          |                | 44.0495  | V    |          |          |          |          |                | 8 |
| 2 | 136.0757 | 235.1441 |          |                | 263.1390 |          |                |          | Y    | 816.3846 |          | 924.4421 | 907.4156 | 906.4316       | 7 |
| 3 | 88.0393  | 350.1710 |          | 332.1605       | 378.1660 |          | 360.1554       | 306.1812 | D    | 701.3577 | 700.3624 | 761.3788 | 744.3523 | 743.3682       | 6 |
| 4 | 88.0393  | 465.1980 |          | 447.1874       | 493.1929 |          | 475.1823       | 421.2082 | D    | 586.3307 | 585.3355 | 646.3519 | 629.3253 | 628.3413       | 5 |
| 5 | 102.0550 | 594.2406 |          | 576.2300       | 622.2355 |          | 604.2249       | 536.2351 | E    | 457.2881 | 456.2929 | 531.3249 | 514.2984 | 513.3144       | 4 |
| 6 | 72.0808  | 693.3090 |          | 675.2984       | 721.3039 |          | 703.2933       | 679.2933 | V    | 358.2197 | 371.2401 | 402.2823 | 385.2558 |                | 3 |
| 7 | 129.1135 | 849.4101 | 832.3836 | 831.3995       | 877.4050 | 860.3785 | 859.3945       | 764.3461 | R    | 202.1186 | 201.1234 | 303.2139 | 286.1874 |                | 2 |
| 8 | 101.1073 |          |          |                |          |          |                |          | K    | 74.0237  | 73.0284  | 147.1128 | 130.0863 |                | 1 |

| Seq   | ya       | yb       | Seq  | ya       | yb       | Seq  | ya       | yb       |
|-------|----------|----------|------|----------|----------|------|----------|----------|
| YD    | 251.1026 | 279.0975 | YDD  | 366.1296 | 394.1245 | YDDE | 495.1722 | 523.1671 |
| YDDEV | 594.2406 | 622.2355 | DD   | 203.0662 | 231.0612 | DDE  | 332.1088 | 360.1038 |
| DDEV  | 431.1773 | 459.1722 | DDEV | 587.2784 | 615.2733 | DE   | 217.0819 | 245.0768 |
| DEV   | 316.1503 | 344.1452 | DEV  | 472.2514 | 500.2463 | EV   | 201.1234 | 229.1183 |

|            |          |                 |           |          |          |  |  |  |
|------------|----------|-----------------|-----------|----------|----------|--|--|--|
| <b>EVR</b> | 357.2245 | <b>385.2194</b> | <b>VR</b> | 228.1819 | 256.1768 |  |  |  |
|------------|----------|-----------------|-----------|----------|----------|--|--|--|

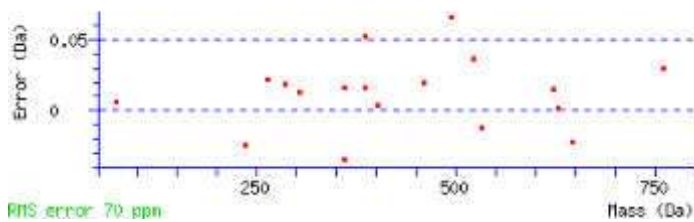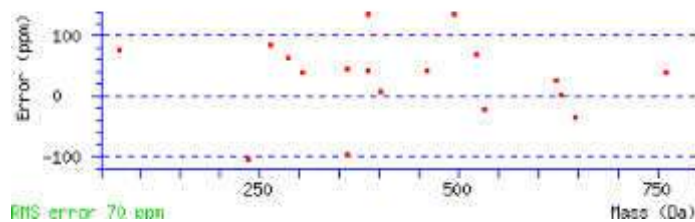

NCBI **BLAST** search of [VYDDEVK](#)

(Parameters: blastp, nr protein database, expect=20000, no filter, PAM30)

Other BLAST [web gateways](#)

#### All matches to this query

| Score | Mr(calc)  | Delta   | Sequence                  |
|-------|-----------|---------|---------------------------|
| 31.4  | 1022.5033 | 0.0114  | <a href="#">VYDDEVK</a>   |
| 19.7  | 1022.4669 | 0.0477  | <a href="#">YVDDAVEGR</a> |
| 19.7  | 1022.5185 | -0.0039 | <a href="#">VYDPFLNR</a>  |
| 19.6  | 1022.5033 | 0.0113  | <a href="#">YVDDIVGSR</a> |
| 17.9  | 1022.5873 | -0.0726 | <a href="#">LIHEEVK</a>   |
| 17.8  | 1022.5145 | 0.0001  | <a href="#">QDTGYGVK</a>  |
| 16.4  | 1022.5075 | 0.0071  | <a href="#">MMLLVVQR</a>  |
| 16.0  | 1022.4702 | 0.0444  | <a href="#">DMTEEVK</a>   |
| 15.1  | 1022.5185 | -0.0039 | <a href="#">VYPFDNLR</a>  |
| 14.5  | 1022.4637 | 0.0509  | <a href="#">ANKDMICR</a>  |

Mascot: <http://www.matrixscience.com/>



# Mascot Search Results

## Peptide View **Spot no 74**

### MS/MS Fragmentation of **EGPPEFEQPK**

Found in **gi|8918361** in **NCBI**nr, RuBisCO activase small isoform precursor [Oryza sativa]

Match to Query 25: 1156.536524 from(1157.543800,1+) intensity(0.0000) index(9)

Title: Label: L1, Spot\_Id: 219685, Peak\_List\_Id: 225091, MSMS Job\_Run\_Id: 21764, Comment:

Data file C:\Documents and Settings\Administrator\Desktop\farah BHU\spot set plate\Farah-Garima 11May 2013\ppw\_L1\_136842039200.txt

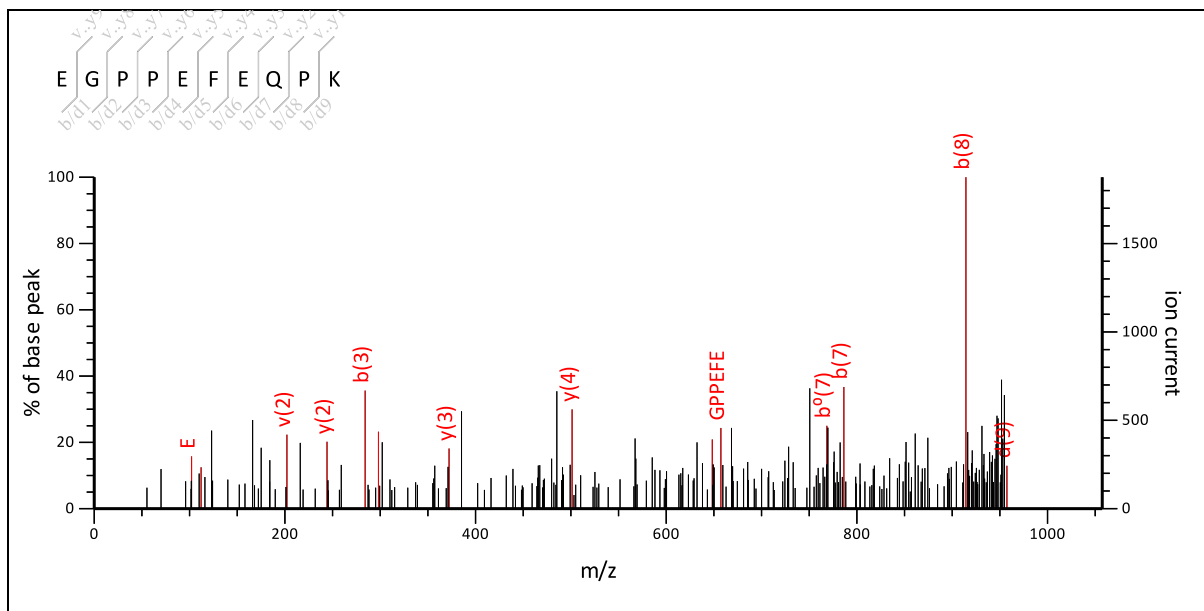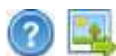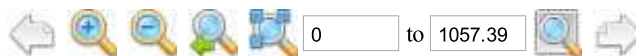

Label all possible matches  Label matches used for scoring

Monoisotopic mass of neutral peptide Mr(calc): 1156.5400

Fixed modifications: Carbamidomethyl (C) (apply to specified residues or termini only)

Ions Score: 16 Expect: 45

Matches: 18/142 fragment ions using 28 most intense peaks ([help](#))

| #  | Immon.   | a        | a*       | a <sup>0</sup> | b         | b*       | b <sup>0</sup> | d        | Seq. | v        | w        | y         | y*        | y <sup>0</sup> | #  |
|----|----------|----------|----------|----------------|-----------|----------|----------------|----------|------|----------|----------|-----------|-----------|----------------|----|
| 1  | 102.0550 | 102.0550 |          | 84.0444        | 130.0499  |          | 112.0393       | 44.0495  | E    |          |          |           |           |                | 10 |
| 2  | 30.0338  | 159.0764 |          | 141.0659       | 187.0713  |          | 169.0608       |          | G    |          |          | 1028.5047 | 1011.4782 | 1010.4942      | 9  |
| 3  | 70.0651  | 256.1292 |          | 238.1186       | 284.1241  |          | 266.1135       | 230.1135 | P    | 929.4363 | 928.4411 | 971.4833  | 954.4567  | 953.4727       | 8  |
| 4  | 70.0651  | 353.1819 |          | 335.1714       | 381.1769  |          | 363.1663       | 327.1663 | P    | 832.3836 | 831.3883 | 874.4305  | 857.4040  | 856.4199       | 7  |
| 5  | 102.0550 | 482.2245 |          | 464.2140       | 510.2195  |          | 492.2089       | 424.2191 | E    | 703.3410 | 702.3457 | 777.3777  | 760.3512  | 759.3672       | 6  |
| 6  | 120.0808 | 629.2930 |          | 611.2824       | 657.2879  |          | 639.2773       |          | F    | 556.2726 |          | 648.3352  | 631.3086  | 630.3246       | 5  |
| 7  | 102.0550 | 758.3355 |          | 740.3250       | 786.3305  |          | 768.3199       | 700.3301 | E    | 427.2300 | 426.2347 | 501.2667  | 484.2402  | 483.2562       | 4  |
| 8  | 101.0709 | 886.3941 | 869.3676 | 868.3836       | 914.3890  | 897.3625 | 896.3785       | 829.3727 | Q    | 299.1714 | 298.1761 | 372.2241  | 355.1976  |                | 3  |
| 9  | 70.0651  | 983.4469 | 966.4203 | 965.4363       | 1011.4418 | 994.4153 | 993.4312       | 957.4312 | P    | 202.1186 | 201.1234 | 244.1656  | 227.1390  |                | 2  |
| 10 | 101.1073 |          |          |                |           |          |                |          | K    | 74.0237  | 73.0284  | 147.1128  | 130.0863  |                | 1  |

| Seq   | ya       | yb       | Seq    | ya       | yb       | Seq   | ya       | yb       |
|-------|----------|----------|--------|----------|----------|-------|----------|----------|
| GP    | 127.0866 | 155.0815 | GPP    | 224.1394 | 252.1343 | GPPE  | 353.1819 | 381.1769 |
| GPPEF | 500.2504 | 528.2453 | GPPEFE | 629.2930 | 657.2879 | PP    | 167.1179 | 195.1128 |
| PPE   | 296.1605 | 324.1554 | PPEF   | 443.2289 | 471.2238 | PPEFE | 572.2715 | 600.2664 |
| PE    | 199.1077 | 227.1026 | PEF    | 346.1761 | 374.1710 | PEFE  | 475.2187 | 503.2136 |

|                       |          |          |                       |          |          |                     |          |          |
|-----------------------|----------|----------|-----------------------|----------|----------|---------------------|----------|----------|
| <a href="#">PEFEQ</a> | 603.2773 | 631.2722 | <a href="#">EF</a>    | 249.1234 | 277.1183 | <a href="#">EFE</a> | 378.1660 | 406.1609 |
| <a href="#">EFEQ</a>  | 506.2245 | 534.2195 | <a href="#">EFEQP</a> | 603.2773 | 631.2722 | <a href="#">FE</a>  | 249.1234 | 277.1183 |
| <a href="#">FEQ</a>   | 377.1819 | 405.1769 | <a href="#">FEQP</a>  | 474.2347 | 502.2296 | <a href="#">EQ</a>  | 230.1135 | 258.1084 |
| <a href="#">EQP</a>   | 327.1663 | 355.1612 | <a href="#">QP</a>    | 198.1237 | 226.1186 |                     |          |          |

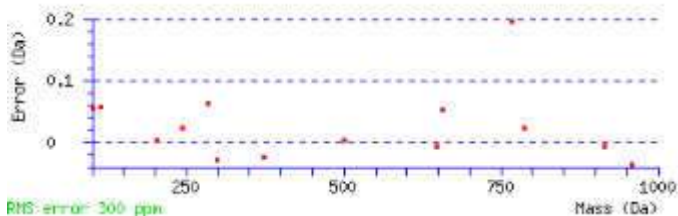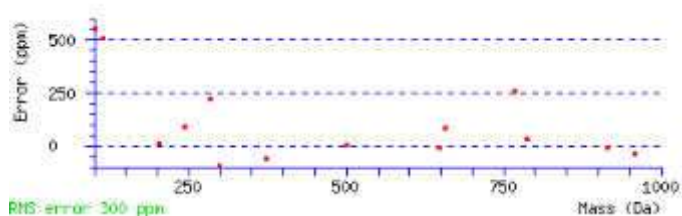

NCBI **BLAST** search of [EGPPEFEQPK](#)

(Parameters: blastp, nr protein database, expect=20000, no filter, PAM30)

Other BLAST [web gateways](#)

#### All matches to this query

| Score | Mr(calcd) | Delta   | Sequence                     |
|-------|-----------|---------|------------------------------|
| 16.2  | 1156.5400 | -0.0035 | <a href="#">EGPPEFEQPK</a>   |
| 15.1  | 1156.5910 | -0.0545 | <a href="#">SLPSCAAVQPK</a>  |
| 13.2  | 1156.6200 | -0.0835 | <a href="#">TALSKGNNQPK</a>  |
| 13.0  | 1156.5910 | -0.0545 | <a href="#">THLOSTVMPK</a>   |
| 11.9  | 1156.6063 | -0.0698 | <a href="#">IHQFMEKPK</a>    |
| 11.7  | 1156.5611 | -0.0246 | <a href="#">EEINELDAPK</a>   |
| 11.3  | 1156.5949 | -0.0583 | <a href="#">EATGAATARGPR</a> |
| 11.2  | 1156.5335 | 0.0030  | <a href="#">HAEMKDWPK</a>    |
| 11.2  | 1156.5585 | -0.0219 | <a href="#">RSQNGNOEPK</a>   |
| 11.0  | 1156.6200 | -0.0835 | <a href="#">ENKQATNKPK</a>   |

Mascot: <http://www.matrixscience.com/>


**Mascot Search Results**
**Peptide View Spot no 74**
**MS/MS Fragmentation of SFQCELVFAK**

 Found in **gi|8918361** in **NCBI**, RuBisCO activase small isoform precursor [Oryza sativa]

Match to Query 31: 1227.593924 from(1228.601200,1+) intensity(0.0000) index(12)

Title: Label: L1, Spot\_Id: 219685, Peak\_List\_Id: 225081, MSMS Job\_Run\_Id: 21764, Comment:

Data file C:\Documents and Settings\Administrator\Desktop\farah BHU\spot set plate\Farah-Garima 11May 2013\ppw\_L1\_136842039200.txt

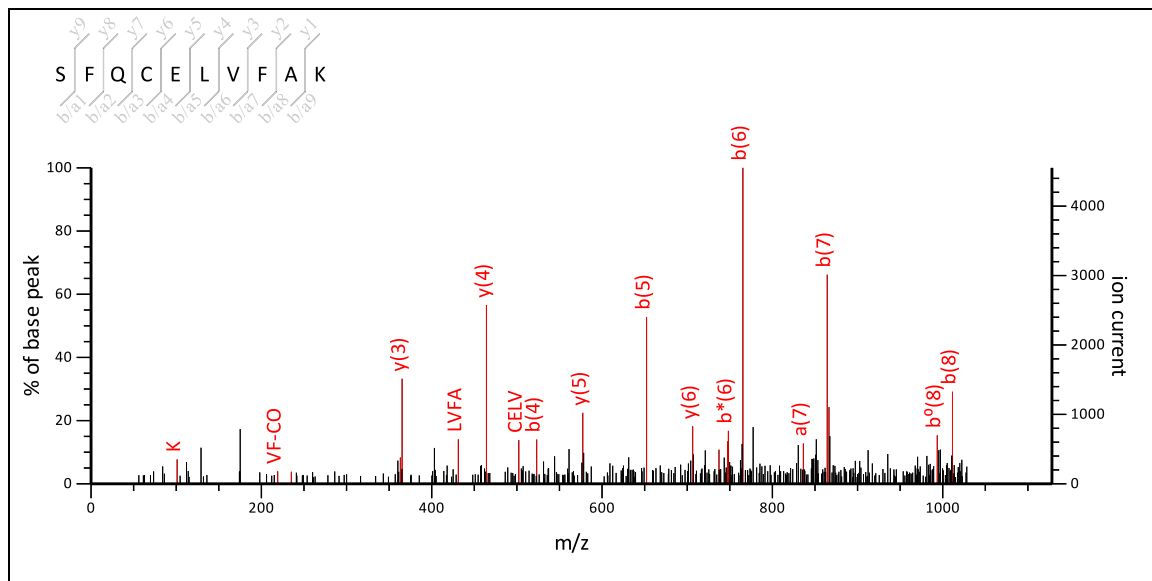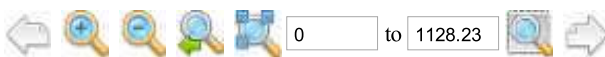
 Label all possible matches  Label matches used for scoring 
**Monoisotopic mass of neutral peptide Mr(calc):** 1227.5958

**Fixed modifications:** Carbamidomethyl (C) (apply to specified residues or termini only)

**Ions Score:** 40 **Expect:** 0.19

**Matches:** 25/148 fragment ions using 40 most intense peaks ([help](#))

| #  | Immon.          | a               | a*        | a <sup>0</sup> | b                | b*              | b <sup>0</sup>  | d        | Seq. | v         | w        | y               | y*        | y <sup>0</sup> | #  |
|----|-----------------|-----------------|-----------|----------------|------------------|-----------------|-----------------|----------|------|-----------|----------|-----------------|-----------|----------------|----|
| 1  | 60.0444         | 60.0444         |           | 42.0338        | 88.0393          |                 | 70.0287         | 44.0495  | S    |           |          |                 |           |                | 10 |
| 2  | 120.0808        | 207.1128        |           | 189.1022       | <b>235.1077</b>  |                 | 217.0972        |          | F    | 1049.5084 |          | 1141.5710       | 1124.5445 | 1123.5605      | 9  |
| 3  | <b>101.0709</b> | 335.1714        | 318.1448  | 317.1608       | <b>363.1663</b>  | 346.1397        | 345.1557        | 278.1499 | Q    | 921.4499  | 920.4546 | 994.5026        | 977.4761  | 976.4921       | 8  |
| 4  | 133.0430        | 495.2020        | 478.1755  | 477.1915       | <b>523.1969</b>  | 506.1704        | 505.1864        | 406.2085 | C    | 761.4192  | 760.4240 | <b>866.4441</b> | 849.4175  | 848.4335       | 7  |
| 5  | 102.0550        | 624.2446        | 607.2181  | 606.2341       | <b>652.2395</b>  | 635.2130        | 634.2290        | 566.2391 | E    | 632.3766  | 631.3814 | <b>706.4134</b> | 689.3869  | 688.4028       | 6  |
| 6  | 86.0964         | <b>737.3287</b> | 720.3021  | 719.3181       | <b>765.3236</b>  | <b>748.2971</b> | <b>747.3130</b> | 695.2817 | L    | 519.2926  | 518.2973 | <b>577.3708</b> | 560.3443  |                | 5  |
| 7  | 72.0808         | <b>836.3971</b> | 819.3706  | 818.3865       | <b>864.3920</b>  | 847.3655        | 846.3815        | 822.3815 | V    | 420.2241  | 433.2445 | <b>464.2867</b> | 447.2602  |                | 4  |
| 8  | 120.0808        | 983.4655        | 966.4390  | 965.4549       | <b>1011.4604</b> | 994.4339        | <b>993.4499</b> |          | F    | 273.1557  |          | <b>365.2183</b> | 348.1918  |                | 3  |
| 9  | 44.0495         | 1054.5026       | 1037.4761 | 1036.4921      | 1082.4975        | 1065.4710       | 1064.4870       |          | A    | 202.1186  |          | 218.1499        | 201.1234  |                | 2  |
| 10 | <b>101.1073</b> |                 |           |                |                  |                 |                 |          | K    | 74.0237   | 73.0284  | 147.1128        | 130.0863  |                | 1  |

| Seq    | ya       | yb              | Seq   | ya              | yb              | Seq   | ya              | yb       |
|--------|----------|-----------------|-------|-----------------|-----------------|-------|-----------------|----------|
| FQ     | 248.1394 | 276.1343        | FQC   | 408.1700        | 436.1649        | FQCE  | 537.2126        | 565.2075 |
| FQCEL  | 650.2967 | 678.2916        | QC    | 261.1016        | 289.0965        | QCE   | 390.1442        | 418.1391 |
| QCEL   | 503.2282 | 531.2232        | QCELV | 602.2967        | 630.2916        | CE    | 262.0856        | 290.0805 |
| CEL    | 375.1697 | <b>403.1646</b> | CELV  | 474.2381        | <b>502.2330</b> | CELVF | 621.3065        | 649.3014 |
| CELVFA | 692.3436 | 720.3385        | EL    | 215.1390        | 243.1339        | ELV   | 314.2074        | 342.2023 |
| ELVF   | 461.2758 | 489.2708        | ELVFA | 532.3130        | 560.3079        | LV    | 185.1648        | 213.1598 |
| LVF    | 332.2333 | 360.2282        | LVFA  | <b>403.2704</b> | <b>431.2653</b> | VF    | <b>219.1492</b> | 247.1441 |



|     |          |          |    |          |          |  |  |  |
|-----|----------|----------|----|----------|----------|--|--|--|
| VFA | 290.1863 | 318.1812 | FA | 191.1179 | 219.1128 |  |  |  |
|-----|----------|----------|----|----------|----------|--|--|--|

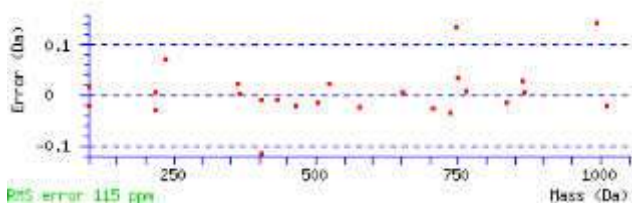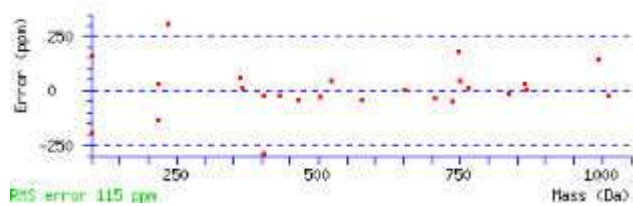

NCBI BLAST search of [SFOCELVFAK](#)

(Parameters: blastp, nr protein database, expect=20000, no filter, PAM30)

Other BLAST [web gateways](#)

#### All matches to this query

| Score | Mr(calc)  | Delta   | Sequence                    |
|-------|-----------|---------|-----------------------------|
| 40.5  | 1227.5958 | -0.0019 | <a href="#">SFOCELVFAK</a>  |
| 40.5  | 1227.5628 | 0.0311  | <a href="#">SFOCELVMAK</a>  |
| 39.0  | 1227.5628 | 0.0311  | <a href="#">SFOCELVMSK</a>  |
| 24.5  | 1227.5992 | -0.0052 | <a href="#">GCFVIKTEMK</a>  |
| 20.6  | 1227.4860 | 0.1079  | <a href="#">ECSSLTSECR</a>  |
| 19.9  | 1227.5376 | 0.0563  | <a href="#">FGCVSTMASPR</a> |
| 19.2  | 1227.6208 | -0.0268 | <a href="#">KVHPESSTSTR</a> |
| 18.7  | 1227.6248 | -0.0308 | <a href="#">HKPTSESPFAK</a> |
| 16.7  | 1227.6612 | -0.0672 | <a href="#">YTKALTTFOR</a>  |
| 15.9  | 1227.6499 | -0.0560 | <a href="#">KFSVDISYAAK</a> |

Mascot: <http://www.matrixscience.com/>


**Mascot Search Results**
**Peptide View** Spot no 74

**MS/MS Fragmentation of WVSDTGVENIGKR**

 Found in **gi8918361** in **NCBI nr**, RuBisCO activase small isoform precursor [Oryza sativa]

Match to Query 43: 1459.774424 from(1460.781700,1+) intensity(0.0000) index(16)

Title: Label: L1, Spot\_Id: 219685, Peak\_List\_Id: 225085, MSMS Job\_Run\_Id: 21764, Comment:

Data file C:\Documents and Settings\Administrator\Desktop\farah BHU\spot set plate\Farah-Garima 11May 2013\ppw\_L1\_136842039200.txt

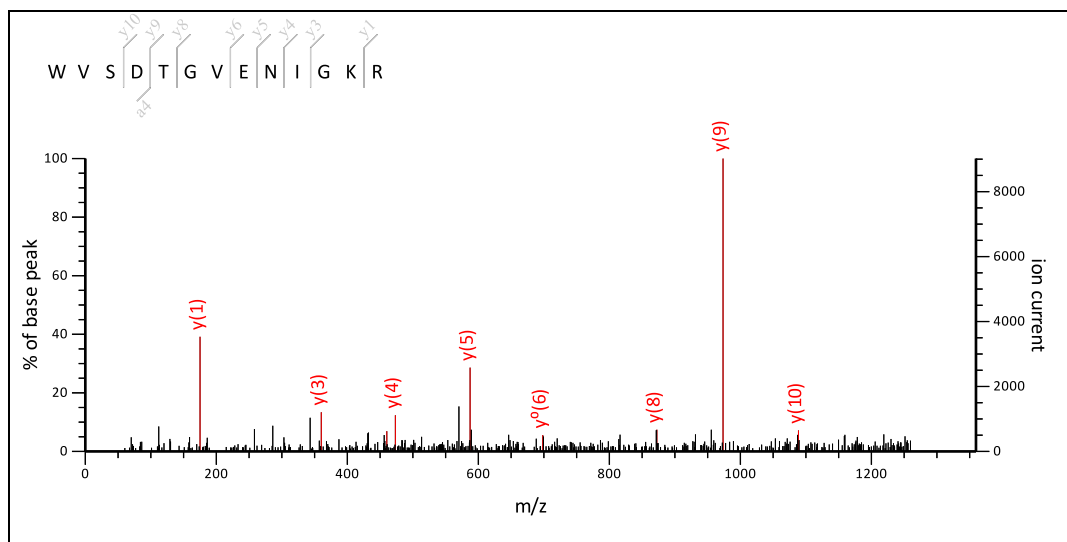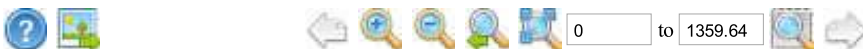
 Label all possible matches  Label matches used for scoring 

Monoisotopic mass of neutral peptide Mr(calc): 1459.7419

Fixed modifications: Carbamidomethyl (C) (apply to specified residues or termini only)

Ions Score: 55 Expect: 0.0064

 Matches : 14/217 fragment ions using 12 most intense peaks ([help](#))

| #  | Immon.   | a               | a*        | a <sup>0</sup> | b         | b*        | b <sup>0</sup> | d         | d'        | Seq. | v         | w         | w'       | y                | y*        |
|----|----------|-----------------|-----------|----------------|-----------|-----------|----------------|-----------|-----------|------|-----------|-----------|----------|------------------|-----------|
| 1  | 159.0917 | 159.0917        |           |                | 187.0866  |           |                | 44.0495   |           | W    |           |           |          |                  |           |
| 2  | 72.0808  | 258.1601        |           |                | 286.1550  |           |                | 244.1444  |           | V    | 1230.6073 | 1243.6277 |          | 1274.6699        | 1257.6434 |
| 3  | 60.0444  | 345.1921        |           | 327.1816       | 373.1870  |           | 355.1765       | 329.1972  |           | S    | 1143.5753 | 1142.5800 |          | 1175.6015        | 1158.5749 |
| 4  | 88.0393  | <b>460.2191</b> |           | 442.2085       | 488.2140  |           | 470.2034       | 416.2292  |           | D    | 1028.5483 | 1027.5531 |          | <b>1088.5695</b> | 1071.5429 |
| 5  | 74.0600  | 561.2667        |           | 543.2562       | 589.2617  |           | 571.2511       | 545.2718  | 547.2511  | T    | 927.5007  | 940.5211  | 942.5003 | <b>973.5425</b>  | 956.5160  |
| 6  | 30.0338  | 618.2882        |           | 600.2776       | 646.2831  |           | 628.2726       |           |           | G    |           |           |          | <b>872.4948</b>  | 855.4683  |
| 7  | 72.0808  | 717.3566        |           | 699.3461       | 745.3515  |           | 727.3410       | 703.3410  |           | V    | 771.4108  | 784.4312  |          | 815.4734         | 798.4468  |
| 8  | 102.0550 | 846.3992        |           | 828.3886       | 874.3941  |           | 856.3836       | 788.3937  |           | E    | 642.3682  | 641.3729  |          | 716.4050         | 699.3784  |
| 9  | 87.0553  | 960.4421        | 943.4156  | 942.4316       | 988.4371  | 971.4105  | 970.4265       | 917.4363  |           | N    | 528.3253  | 527.3300  |          | <b>587.3624</b>  | 570.3358  |
| 10 | 86.0964  | 1073.5262       | 1056.4997 | 1055.5156      | 1101.5211 | 1084.4946 | 1083.5105      | 1045.4949 | 1059.5105 | I    | 415.2412  | 428.2616  | 442.2772 | <b>473.3194</b>  | 456.2929  |
| 11 | 30.0338  | 1130.5477       | 1113.5211 | 1112.5371      | 1158.5426 | 1141.5160 | 1140.5320      |           |           | G    |           |           |          | <b>360.2354</b>  | 343.2088  |
| 12 | 101.1073 | 1258.6426       | 1241.6161 | 1240.6321      | 1286.6375 | 1269.6110 | 1268.6270      | 1201.5848 |           | K    | 230.1248  | 229.1295  |          | 303.2139         | 286.1874  |
| 13 | 129.1135 |                 |           |                |           |           |                |           |           | R    | 74.0237   | 73.0284   |          | <b>175.1190</b>  | 158.0924  |

| Seq    | ya              | yb              | Seq     | ya       | yb       | Seq      | ya              | yb       |
|--------|-----------------|-----------------|---------|----------|----------|----------|-----------------|----------|
| VS     | 159.1128        | 187.1077        | VSD     | 274.1397 | 302.1347 | VSDT     | 375.1874        | 403.1823 |
| VSDTG  | 432.2089        | <b>460.2038</b> | VSDTGV  | 531.2773 | 559.2722 | VSDTGV E | 660.3199        | 688.3148 |
| SD     | <b>175.0713</b> | 203.0662        | SDT     | 276.1190 | 304.1139 | SDTG     | 333.1405        | 361.1354 |
| SDTGV  | 432.2089        | <b>460.2038</b> | SDTGV E | 561.2515 | 589.2464 | SDTGVEN  | 675.2944        | 703.2893 |
| DT     | 189.0870        | 217.0819        | DTG     | 246.1084 | 274.1034 | DTGV     | 345.1769        | 373.1718 |
| DTGV E | 474.2195        | 502.2144        | DTGVEN  | 588.2624 | 616.2573 | TG       | 131.0815        | 159.0764 |
| TGV    | 230.1499        | 258.1448        | TGVE    | 359.1925 | 387.1874 | TGVEN    | <b>473.2354</b> | 501.2304 |
| TGVENI | 586.3195        | 614.3144        | TGVENIG | 643.3410 | 671.3359 | GV       | 129.1022        | 157.0972 |

|                        |          |          |                         |          |                 |                       |          |          |
|------------------------|----------|----------|-------------------------|----------|-----------------|-----------------------|----------|----------|
| <a href="#">GVE</a>    | 258.1448 | 286.1397 | <a href="#">GVEN</a>    | 372.1878 | 400.1827        | <a href="#">GVENI</a> | 485.2718 | 513.2667 |
| <a href="#">GVENIG</a> | 542.2933 | 570.2882 | <a href="#">GVENIGK</a> | 670.3882 | <b>698.3832</b> | <a href="#">VE</a>    | 201.1234 | 229.1183 |
| <a href="#">VEN</a>    | 315.1663 | 343.1612 | <a href="#">VENI</a>    | 428.2504 | 456.2453        | <a href="#">VENIG</a> | 485.2718 | 513.2667 |
| <a href="#">VENIGK</a> | 613.3668 | 641.3617 | <a href="#">EN</a>      | 216.0979 | 244.0928        | <a href="#">ENI</a>   | 329.1819 | 357.1769 |
| <a href="#">ENIG</a>   | 386.2034 | 414.1983 | <a href="#">ENIGK</a>   | 514.2984 | 542.2933        | <a href="#">NI</a>    | 200.1394 | 228.1343 |
| <a href="#">NIG</a>    | 257.1608 | 285.1557 | <a href="#">NIGK</a>    | 385.2558 | 413.2507        | <a href="#">IG</a>    | 143.1179 | 171.1128 |
| <a href="#">IGK</a>    | 271.2129 | 299.2078 | <a href="#">GK</a>      | 158.1288 | 186.1237        |                       |          |          |

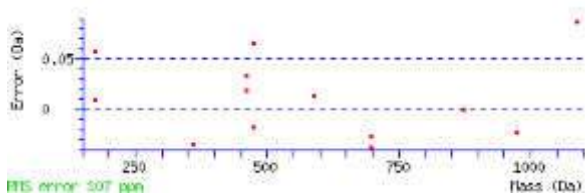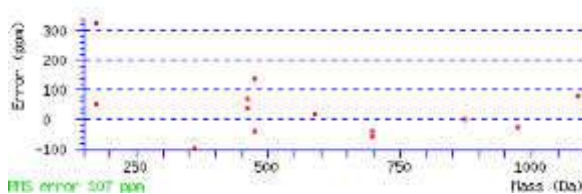

NCBI BLAST search of [WVSDTGVENIGKR](#)

(Parameters: blastp, nr protein database, expect=20000, no filter, PAM30)

Other BLAST [web gateways](#)

#### All matches to this query

| Score | Mr(calc)  | Delta   | Sequence                         |
|-------|-----------|---------|----------------------------------|
| 55.1  | 1459.7419 | 0.0325  | <a href="#">WVSDTGVENIGKR</a>    |
| 31.3  | 1459.7024 | 0.0720  | <a href="#">CLOMGAGVGVGAGAGR</a> |
| 24.8  | 1459.7089 | 0.0655  | <a href="#">ADVLAQQAGMDIGR</a>   |
| 22.0  | 1459.6950 | 0.0794  | <a href="#">AAARCGTSPSAAGAGR</a> |
| 21.6  | 1459.7453 | 0.0291  | <a href="#">QSSVAPGASSMAVLR</a>  |
| 21.1  | 1459.6903 | 0.0841  | <a href="#">GNNTDSGVDLEAIR</a>   |
| 20.0  | 1459.6652 | 0.1093  | <a href="#">TDEAGGVNOTGAGGAR</a> |
| 19.5  | 1459.7783 | -0.0039 | <a href="#">WVTSTGIENIGKR</a>    |
| 19.4  | 1459.6539 | 0.1205  | <a href="#">EENDVYSQOQOR</a>     |
| 19.3  | 1459.8035 | -0.0291 | <a href="#">LALGADGFVETLVR</a>   |

Mascot: <http://www.matrixscience.com/>

**MATRIX SCIENCE Mascot Search Results**

**Peptide View Spot no 74**

MS/MS Fragmentation of **GLAYDISDDQDITR**

Found in **gi|8918361** in **NCBInr**, RuBisCO activase small isoform precursor [Oryza sativa]

Match to Query 51: 1708.823924 from(1709.831200,1+) intensity(0.0000) index(19)

Title: Label: L1, Spot\_Id: 219685, Peak\_List\_Id: 225079, MSMS Job\_Run\_Id: 21764, Comment:

Data file C:\Documents and Settings\Administrator\Desktop\farah BHU\spot set plate\Farah-Garima 11May 2013\ppw\_L1\_136842039200.txt

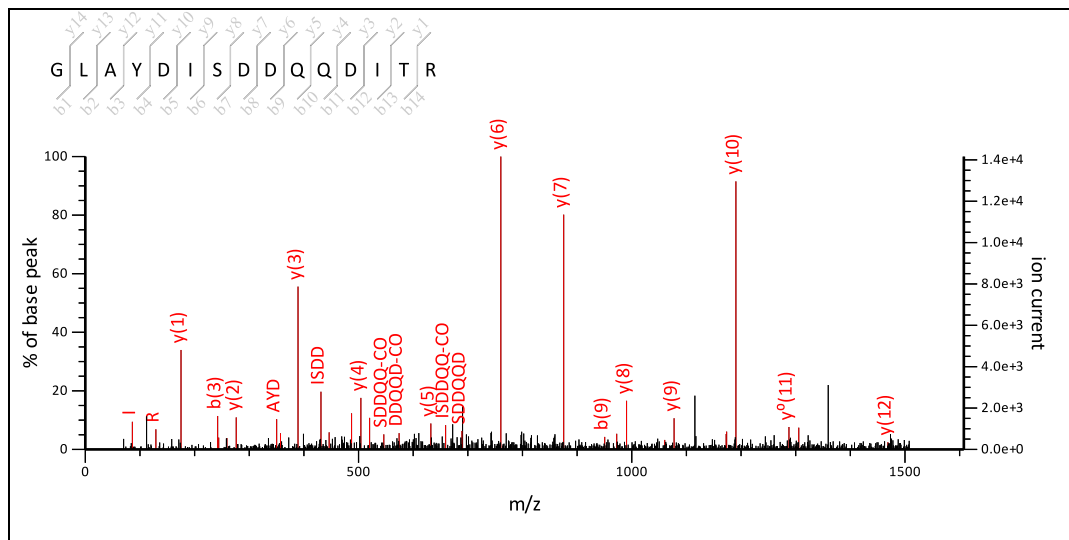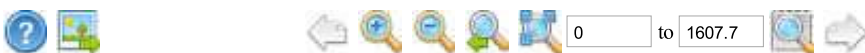

Label all possible matches  Label matches used for scoring

Monoisotopic mass of neutral peptide Mr(calc): 1708.7904

Fixed modifications: Carbamidomethyl (C) (apply to specified residues or termini only)

Ions Score: 78 Expect: 3.1e-05

Matches : 43/255 fragment ions using 60 most intense peaks [\(help\)](#)

| #  | Immon.   | a         | a*        | a <sup>0</sup> | b         | b*        | b <sup>0</sup> | d         | d'        | Seq. | v         | w         | w'        | y         | y*        |
|----|----------|-----------|-----------|----------------|-----------|-----------|----------------|-----------|-----------|------|-----------|-----------|-----------|-----------|-----------|
| 1  | 30.0338  | 30.0338   |           |                | 58.0287   |           |                | 44.0495   |           | G    |           |           |           |           |           |
| 2  | 86.0964  | 143.1179  |           |                | 171.1128  |           |                | 101.0709  |           | L    | 1594.6980 | 1593.7027 |           | 1652.7762 | 1635.7497 |
| 3  | 44.0495  | 214.1550  |           |                | 242.1499  |           |                |           |           | A    | 1523.6609 |           |           | 1539.6922 | 1522.6656 |
| 4  | 136.0757 | 377.2183  |           |                | 405.2132  |           |                |           |           | Y    | 1360.5975 |           |           | 1468.6550 | 1451.6285 |
| 5  | 88.0393  | 492.2453  |           | 474.2347       | 520.2402  |           | 502.2296       | 448.2554  |           | D    | 1245.5706 | 1244.5753 |           | 1305.5917 | 1288.5652 |
| 6  | 86.0964  | 605.3293  |           | 587.3188       | 633.3243  |           | 615.3137       | 577.2980  | 591.3137  | I    | 1132.4865 | 1145.5069 | 1159.5226 | 1190.5648 | 1173.5382 |
| 7  | 60.0444  | 692.3614  |           | 674.3508       | 720.3563  |           | 702.3457       | 676.3665  |           | S    | 1045.4545 | 1044.4592 |           | 1077.4807 | 1060.4542 |
| 8  | 88.0393  | 807.3883  |           | 789.3777       | 835.3832  |           | 817.3727       | 763.3985  |           | D    | 930.4276  | 929.4323  |           | 990.4487  | 973.4221  |
| 9  | 88.0393  | 922.4153  |           | 904.4047       | 950.4102  |           | 932.3996       | 878.4254  |           | D    | 815.4006  | 814.4054  |           | 875.4217  | 858.3952  |
| 10 | 101.0709 | 1050.4738 | 1033.4473 | 1032.4633      | 1078.4687 | 1061.4422 | 1060.4582      | 993.4524  |           | Q    | 687.3420  | 686.3468  |           | 760.3948  | 743.3682  |
| 11 | 101.0709 | 1178.5324 | 1161.5059 | 1160.5218      | 1206.5273 | 1189.5008 | 1188.5168      | 1121.5109 |           | Q    | 559.2835  | 558.2882  |           | 632.3362  | 615.3097  |
| 12 | 88.0393  | 1293.5594 | 1276.5328 | 1275.5488      | 1321.5543 | 1304.5277 | 1303.5437      | 1249.5695 |           | D    | 444.2565  | 443.2613  |           | 504.2776  | 487.2511  |
| 13 | 86.0964  | 1406.6434 | 1389.6169 | 1388.6329      | 1434.6383 | 1417.6118 | 1416.6278      | 1378.6121 | 1392.6278 | I    | 331.1724  | 344.1928  | 358.2085  | 389.2507  | 372.2241  |
| 14 | 74.0600  | 1507.6911 | 1490.6645 | 1489.6805      | 1535.6860 | 1518.6595 | 1517.6754      | 1491.6962 | 1493.6754 | T    | 230.1248  | 243.1452  | 245.1244  | 276.1666  | 259.1401  |
| 15 | 129.1135 |           |           |                |           |           |                |           |           | R    | 74.0237   | 73.0284   |           | 175.1190  | 158.0924  |

| Seq    | ya       | yb       | Seq    | ya       | yb       | Seq    | ya       | yb       |
|--------|----------|----------|--------|----------|----------|--------|----------|----------|
| LA     | 157.1335 | 185.1285 | LAY    | 320.1969 | 348.1918 | LAYD   | 435.2238 | 463.2187 |
| LAYDI  | 548.3079 | 576.3028 | LAYDIS | 635.3399 | 663.3348 | AY     | 207.1128 | 235.1077 |
| AYD    | 322.1397 | 350.1347 | AYDI   | 435.2238 | 463.2187 | AYDIS  | 522.2558 | 550.2508 |
| AYDISD | 637.2828 | 665.2777 | YD     | 251.1026 | 279.0975 | YDI    | 364.1867 | 392.1816 |
| YDIS   | 451.2187 | 479.2136 | YDISD  | 566.2457 | 594.2406 | YDISDD | 681.2726 | 709.2675 |
| DI     | 201.1234 | 229.1183 | DIS    | 288.1554 | 316.1503 | DISD   | 403.1823 | 431.1773 |

|        |          |          |        |          |          |        |          |          |
|--------|----------|----------|--------|----------|----------|--------|----------|----------|
| DISDD  | 518.2093 | 546.2042 | DISDDQ | 646.2679 | 674.2628 | IS     | 173.1285 | 201.1234 |
| ISD    | 288.1554 | 316.1503 | ISDD   | 403.1823 | 431.1773 | ISDDQ  | 531.2409 | 559.2358 |
| ISDDQQ | 659.2995 | 687.2944 | SD     | 175.0713 | 203.0662 | SDD    | 290.0983 | 318.0932 |
| SDDQ   | 418.1569 | 446.1518 | SDDQQ  | 546.2154 | 574.2103 | SDDQQD | 661.2424 | 689.2373 |
| DD     | 203.0662 | 231.0612 | DDQ    | 331.1248 | 359.1197 | DDQQ   | 459.1834 | 487.1783 |
| DDQQD  | 574.2103 | 602.2053 | DDQQDI | 687.2944 | 715.2893 | DQ     | 216.0979 | 244.0928 |
| DQQ    | 344.1565 | 372.1514 | DQQD   | 459.1834 | 487.1783 | DQQDI  | 572.2675 | 600.2624 |
| DQQDIT | 673.3151 | 701.3101 | QQ     | 229.1295 | 257.1244 | QQD    | 344.1565 | 372.1514 |
| QQDI   | 457.2405 | 485.2354 | QQDIT  | 558.2882 | 586.2831 | QD     | 216.0979 | 244.0928 |
| QDI    | 329.1819 | 357.1769 | QDIT   | 430.2296 | 458.2245 | DI     | 201.1234 | 229.1183 |
| DIT    | 302.1710 | 330.1660 | IT     | 187.1441 | 215.1390 |        |          |          |

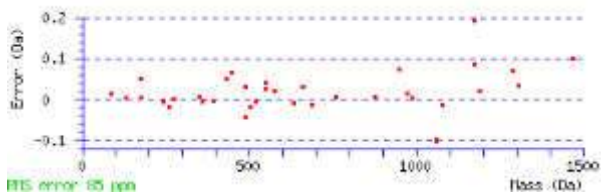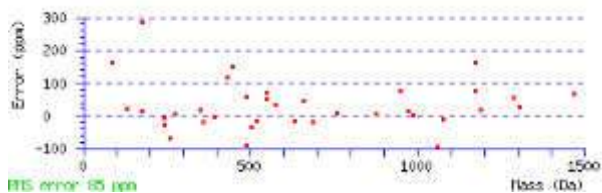

NCBI BLAST search of [GLAYDISDDQQDITR](#)

(Parameters: blastp, nr protein database, expect=20000, no filter, PAM30)

Other BLAST [web gateways](#)

#### All matches to this query

| Score | Mr(calc)  | Delta   | Sequence                           |
|-------|-----------|---------|------------------------------------|
| 77.5  | 1708.7904 | 0.0335  | <a href="#">GLAYDISDDQQDITR</a>    |
| 51.6  | 1708.7540 | 0.0699  | <a href="#">GLAFDESDDQQDITR</a>    |
| 21.9  | 1708.8897 | -0.0658 | <a href="#">AGIDKFGVPVPGDPGGAR</a> |
| 19.3  | 1708.7023 | 0.1216  | <a href="#">SSEQNLES DGEEETR</a>   |
| 18.9  | 1708.7978 | 0.0261  | <a href="#">GLSTDSLMEAGYPGAPK</a>  |
| 16.9  | 1708.8315 | -0.0076 | <a href="#">DMQVRSGQSIVNYGR</a>    |
| 16.4  | 1708.8931 | -0.0691 | <a href="#">MVRFAQVVSSLDITR</a>    |
| 15.5  | 1708.7397 | 0.0843  | <a href="#">CSLADCDDGLVDITR</a>    |
| 15.3  | 1708.8753 | -0.0514 | <a href="#">LOGMVASMSRIPTFR</a>    |
| 15.1  | 1708.9009 | -0.0770 | <a href="#">ANIHALSGAWGDKLTR</a>   |

Mascot: <http://www.matrixscience.com/>

**MATRIX SCIENCE Mascot Search Results**

**Peptide View Spot no 74**

MS/MS Fragmentation of **MCCLFINDLDAGAGR**

Found in **gi8918361** in **NCBInr**, RuBisCO activase small isoform precursor [Oryza sativa]

Match to Query 54: 1727.764324 from(1728.771600,1+) intensity(0.0000) index(20)

Title: Label: L1, Spot\_Id: 219685, Peak\_List\_Id: 225086, MSMS Job\_Run\_Id: 21764, Comment:

Data file C:\Documents and Settings\Administrator\Desktop\farah BHU\spot set plate\Farah-Garima 11May 2013\ppw\_L1\_136842039200.txt

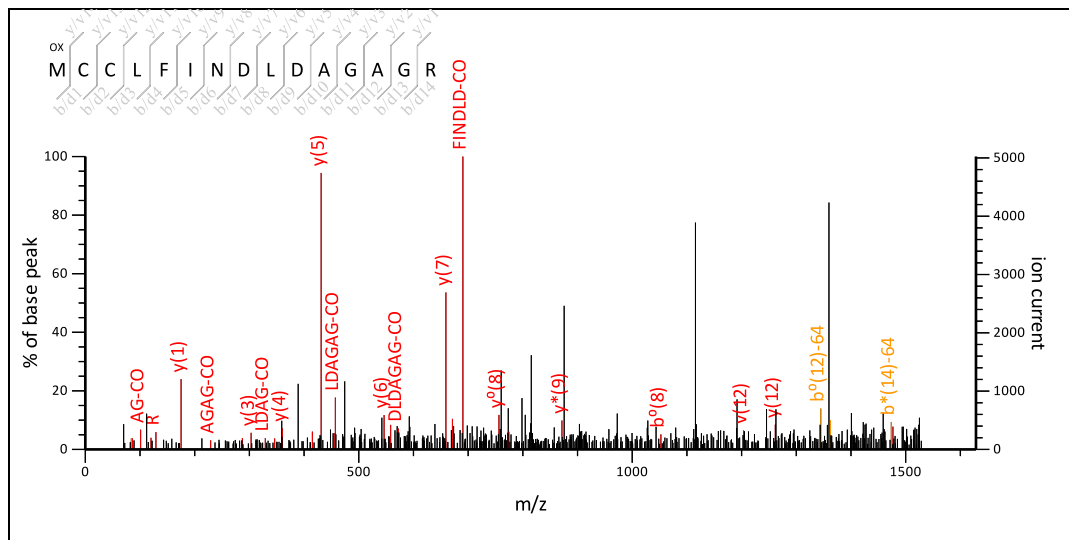

Navigation icons: Home, Back, Forward, Search, etc. Range: 0 to 1628.57

Label all possible matches  Label matches used for scoring

Monoisotopic mass of neutral peptide Mr(calc): 1727.7430  
 Fixed modifications: Carbamidomethyl (C) (apply to specified residues or termini only)  
 Variable modifications:  
 M1 : Oxidation (M), with neutral losses 63.9983(shown in table), 0.0000  
 Ions Score: 16 Expect: 39  
 Matches : 46/311 fragment ions using 105 most intense peaks ([help](#))

| #  | Immon.   | a         | a*        | a <sup>0</sup> | b         | b*        | b <sup>0</sup> | d         | d'       | Seq. | v         | w         | w'       | y         | y*        |
|----|----------|-----------|-----------|----------------|-----------|-----------|----------------|-----------|----------|------|-----------|-----------|----------|-----------|-----------|
| 1  | 56.0495  | 56.0495   |           |                | 84.0444   |           |                | 44.0495   |          | M    |           |           |          |           |           |
| 2  | 133.0430 | 216.0801  |           |                | 244.0750  |           |                | 127.0866  |          | C    | 1476.6900 | 1475.6947 |          | 1581.7148 | 1564.6883 |
| 3  | 133.0430 | 376.1108  |           |                | 404.1057  |           |                | 287.1172  |          | C    | 1316.6593 | 1315.6641 |          | 1421.6842 | 1404.6576 |
| 4  | 86.0964  | 489.1948  |           |                | 517.1898  |           |                | 447.1479  |          | L    | 1203.5753 | 1202.5800 |          | 1261.6535 | 1244.6270 |
| 5  | 120.0808 | 636.2633  |           |                | 664.2582  |           |                |           |          | F    | 1056.5069 |           |          | 1148.5695 | 1131.5429 |
| 6  | 86.0964  | 749.3473  |           |                | 777.3422  |           |                | 721.3160  | 735.3317 | I    | 943.4228  | 956.4432  | 970.4588 | 1001.5010 | 984.4745  |
| 7  | 87.0553  | 863.3902  | 846.3637  |                | 891.3852  | 874.3586  |                | 820.3844  |          | N    | 829.3799  | 828.3846  |          | 888.4170  | 871.3904  |
| 8  | 88.0393  | 978.4172  | 961.3906  | 960.4066       | 1006.4121 | 989.3856  | 988.4015       | 934.4274  |          | D    | 714.3529  | 713.3577  |          | 774.3741  | 757.3475  |
| 9  | 86.0964  | 1091.5013 | 1074.4747 | 1073.4907      | 1119.4962 | 1102.4696 | 1101.4856      | 1049.4543 |          | L    | 601.2689  | 600.2736  |          | 659.3471  | 642.3206  |
| 10 | 88.0393  | 1206.5282 | 1189.5016 | 1188.5176      | 1234.5231 | 1217.4966 | 1216.5125      | 1162.5384 |          | D    | 486.2419  | 485.2467  |          | 546.2631  | 529.2365  |
| 11 | 44.0495  | 1277.5653 | 1260.5388 | 1259.5547      | 1305.5602 | 1288.5337 | 1287.5497      |           |          | A    | 415.2048  |           |          | 431.2361  | 414.2096  |
| 12 | 30.0338  | 1334.5868 | 1317.5602 | 1316.5762      | 1362.5817 | 1345.5551 | 1344.5711      |           |          | G    |           |           |          | 360.1990  | 343.1724  |
| 13 | 44.0495  | 1405.6239 | 1388.5973 | 1387.6133      | 1433.6188 | 1416.5923 | 1415.6082      |           |          | A    | 287.1462  |           |          | 303.1775  | 286.1510  |
| 14 | 30.0338  | 1462.6453 | 1445.6188 | 1444.6348      | 1490.6403 | 1473.6137 | 1472.6297      |           |          | G    |           |           |          | 232.1404  | 215.1139  |
| 15 | 129.1135 |           |           |                |           |           |                |           |          | R    | 74.0237   | 73.0284   |          | 175.1190  | 158.0924  |

| Seq   | ya       | yb       | Seq   | ya       | yb       | Seq  | ya       | yb       |
|-------|----------|----------|-------|----------|----------|------|----------|----------|
| CC    | 293.0737 | 321.0686 | CCL   | 406.1577 | 434.1526 | CCLF | 553.2261 | 581.2211 |
| CCLFI | 666.3102 | 694.3051 | CL    | 246.1271 | 274.1220 | CLF  | 393.1955 | 421.1904 |
| CLFI  | 506.2796 | 534.2745 | CLFIN | 620.3225 | 648.3174 | LF   | 233.1648 | 261.1598 |

|                 |                 |                 |               |                 |                 |                |                 |                 |
|-----------------|-----------------|-----------------|---------------|-----------------|-----------------|----------------|-----------------|-----------------|
| <b>LFI</b>      | <b>346.2489</b> | 374.2438        | <b>LFIN</b>   | 460.2918        | 488.2867        | <b>LFIND</b>   | 575.3188        | 603.3137        |
| <b>LFINDL</b>   | 688.4028        | 716.3978        | <b>FI</b>     | 233.1648        | 261.1598        | <b>FIN</b>     | 347.2078        | 375.2027        |
| <b>FIND</b>     | 462.2347        | 490.2296        | <b>FINDL</b>  | 575.3188        | 603.3137        | <b>FINDLD</b>  | <b>690.3457</b> | 718.3406        |
| <b>IN</b>       | 200.1394        | 228.1343        | <b>IND</b>    | 315.1663        | 343.1612        | <b>INDL</b>    | 428.2504        | <b>456.2453</b> |
| <b>INDLD</b>    | 543.2773        | 571.2722        | <b>INDLDA</b> | 614.3144        | 642.3093        | <b>INDLDAG</b> | <b>671.3359</b> | 699.3308        |
| <b>ND</b>       | 202.0822        | 230.0771        | <b>NDL</b>    | 315.1663        | 343.1612        | <b>NDLD</b>    | 430.1932        | 458.1882        |
| <b>NDLDA</b>    | 501.2304        | 529.2253        | <b>NDLDAG</b> | <b>558.2518</b> | 586.2467        | <b>NDLDAGA</b> | 629.2889        | 657.2838        |
| <b>NDLDAGAG</b> | 686.3104        | 714.3053        | <b>DL</b>     | 201.1234        | <b>229.1183</b> | <b>DLD</b>     | 316.1503        | 344.1452        |
| <b>DLDA</b>     | 387.1874        | <b>415.1823</b> | <b>DLDAG</b>  | 444.2089        | 472.2038        | <b>DLDAGA</b>  | 515.2460        | 543.2409        |
| <b>DLDAGAG</b>  | <b>572.2675</b> | 600.2624        | <b>LD</b>     | 201.1234        | <b>229.1183</b> | <b>LDA</b>     | 272.1605        | 300.1554        |
| <b>LDAG</b>     | <b>329.1819</b> | 357.1769        | <b>LDAGA</b>  | 400.2191        | 428.2140        | <b>LDAGAG</b>  | <b>457.2405</b> | 485.2354        |
| <b>DA</b>       | 159.0764        | 187.0713        | <b>DAG</b>    | 216.0979        | 244.0928        | <b>DAGA</b>    | <b>287.1350</b> | 315.1299        |
| <b>DAGAG</b>    | 344.1565        | 372.1514        | <b>AG</b>     | <b>101.0709</b> | <b>129.0659</b> | <b>AGA</b>     | 172.1081        | 200.1030        |
| <b>AGAG</b>     | <b>229.1295</b> | 257.1244        | <b>GA</b>     | <b>101.0709</b> | <b>129.0659</b> | <b>GAG</b>     | 158.0924        | 186.0873        |
| <b>AG</b>       | <b>101.0709</b> | <b>129.0659</b> |               |                 |                 |                |                 |                 |

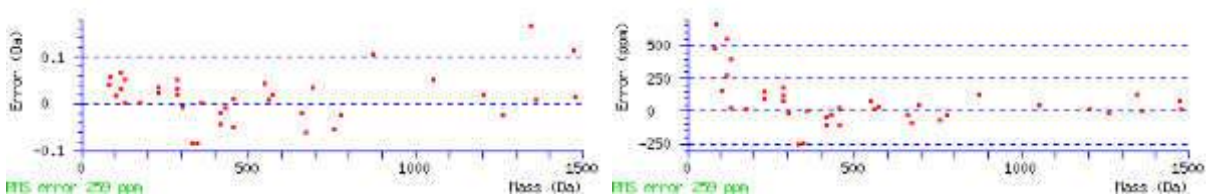

NCBI BLAST search of [MCCLFINDLDAGAGR](#)

(Parameters: blastp, nr protein database, expect=20000, no filter, PAM30)

Other BLAST [web gateways](#)

#### All matches to this query

| Score | Mr(calcd) | Delta   | Sequence                          |
|-------|-----------|---------|-----------------------------------|
| 15.8  | 1727.7430 | 0.0214  | <a href="#">MCCLFINDLDAGAGR</a>   |
| 15.8  | 1727.8261 | -0.0617 | <a href="#">QOKVNDDDAMKPPSR</a>   |
| 15.0  | 1727.9352 | -0.1709 | <a href="#">IPTMDLARLIASQGAR</a>  |
| 13.7  | 1727.8002 | -0.0359 | <a href="#">YFLVSDEESAQTSPR</a>   |
| 11.9  | 1727.8942 | -0.1298 | <a href="#">QQIDETQVIVTTPEK</a>   |
| 9.5   | 1727.8842 | -0.1199 | <a href="#">PSFVANANQOTDVLPK</a>  |
| 9.0   | 1727.9107 | -0.1464 | <a href="#">RNGFGGPAPSEPLGNIK</a> |
| 8.2   | 1727.8414 | -0.0770 | <a href="#">EPDLGGWAVGGCVKQR</a>  |
| 8.2   | 1727.9166 | -0.1523 | <a href="#">VGNVSVRDVLEGLSER</a>  |
| 8.0   | 1727.7785 | -0.0141 | <a href="#">QEVMIQYSDSGKDAGR</a>  |

Mascot: <http://www.matrixscience.com/>



**MATRIX SCIENCE Mascot Search Results**

**Peptide View Spot no 74**

MS/MS Fragmentation of **EGPPEFEQPKMTIEK**

Found in **gi8918361** in **NCBInr**, RuBisCO activase small isoform precursor [Oryza sativa]

Match to Query 58: 1774.860424 from(1775.867700,1+) intensity(0.0000) index(22)

Title: Label: L1, Spot\_Id: 219685, Peak\_List\_Id: 225087, MSMS Job\_Run\_Id: 21764, Comment:

Data file C:\Documents and Settings\Administrator\Desktop\farah BHU\spot set plate\Farah-Garima 11May 2013\ppw\_L1\_136842039200.txt

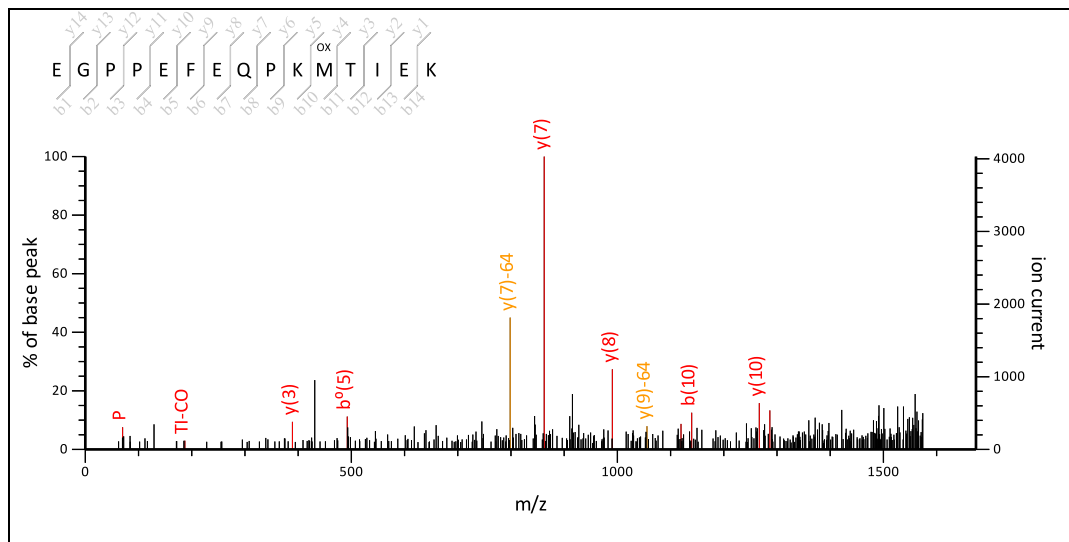

Navigation icons and search range: 0 to 1673.97

Label all possible matches  Label matches used for scoring

Monoisotopic mass of neutral peptide Mr(calc): 1774.8447

Fixed modifications: Carbamidomethyl (C) (apply to specified residues or termini only)

Variable modifications:

M11 : Oxidation (M), with neutral losses 0.0000 (shown in table), 63.9983

Ions Score: 17 Expect: 33

Matches : 15/358 fragment ions using 32 most intense peaks [\(help\)](#)

| #  | Immon.   | a         | a*        | a <sup>0</sup> | b         | b*        | b <sup>0</sup> | d         | d'        | Seq. | v         | w         | w'       | y         | y*        |
|----|----------|-----------|-----------|----------------|-----------|-----------|----------------|-----------|-----------|------|-----------|-----------|----------|-----------|-----------|
| 1  | 102.0550 | 102.0550  |           | 84.0444        | 130.0499  |           | 112.0393       | 44.0495   |           | E    |           |           |          |           |           |
| 2  | 30.0338  | 159.0764  |           | 141.0659       | 187.0713  |           | 169.0608       |           |           | G    |           |           |          | 1646.8094 | 1629.7829 |
| 3  | 70.0651  | 256.1292  |           | 238.1186       | 284.1241  |           | 266.1135       | 230.1135  |           | P    | 1547.7410 | 1546.7458 |          | 1589.7880 | 1572.7614 |
| 4  | 70.0651  | 353.1819  |           | 335.1714       | 381.1769  |           | 363.1663       | 327.1663  |           | P    | 1450.6883 | 1449.6930 |          | 1492.7352 | 1475.7087 |
| 5  | 102.0550 | 482.2245  |           | 464.2140       | 510.2195  |           | 492.2089       | 424.2191  |           | E    | 1321.6457 | 1320.6504 |          | 1395.6824 | 1378.6559 |
| 6  | 120.0808 | 629.2930  |           | 611.2824       | 657.2879  |           | 639.2773       |           |           | F    | 1174.5773 |           |          | 1266.6399 | 1249.6133 |
| 7  | 102.0550 | 758.3355  |           | 740.3250       | 786.3305  |           | 768.3199       | 700.3301  |           | E    | 1045.5347 | 1044.5394 |          | 1119.5714 | 1102.5449 |
| 8  | 101.0709 | 886.3941  | 869.3676  | 868.3836       | 914.3890  | 897.3625  | 896.3785       | 829.3727  |           | Q    | 917.4761  | 916.4808  |          | 990.5288  | 973.5023  |
| 9  | 70.0651  | 983.4469  | 966.4203  | 965.4363       | 1011.4418 | 994.4153  | 993.4312       | 957.4312  |           | P    | 820.4233  | 819.4281  |          | 862.4703  | 845.4437  |
| 10 | 101.1073 | 1111.5419 | 1094.5153 | 1093.5313      | 1139.5368 | 1122.5102 | 1121.5262      | 1054.4840 |           | K    | 692.3284  | 691.3331  |          | 765.4175  | 748.3910  |
| 11 | 120.0478 | 1258.5773 | 1241.5507 | 1240.5667      | 1286.5722 | 1269.5456 | 1268.5616      | 1182.5790 |           | M    | 545.2930  | 544.2977  |          | 637.3225  | 620.2960  |
| 12 | 74.0600  | 1359.6249 | 1342.5984 | 1341.6144      | 1387.6198 | 1370.5933 | 1369.6093      | 1343.6300 | 1345.6093 | T    | 444.2453  | 457.2657  | 459.2449 | 490.2871  | 473.2606  |
| 13 | 86.0964  | 1472.7090 | 1455.6824 | 1454.6984      | 1500.7039 | 1483.6774 | 1482.6933      | 1444.6777 | 1458.6933 | I    | 331.1612  | 344.1816  | 358.1973 | 389.2395  | 372.2129  |
| 14 | 102.0550 | 1601.7516 | 1584.7250 | 1583.7410      | 1629.7465 | 1612.7200 | 1611.7359      | 1543.7461 |           | E    | 202.1186  | 201.1234  |          | 276.1554  | 259.1288  |
| 15 | 101.1073 |           |           |                |           |           |                |           |           | K    | 74.0237   | 73.0284   |          | 147.1128  | 130.0863  |

| Seq   | ya       | yb       | Seq    | ya       | yb       | Seq   | ya       | yb       |
|-------|----------|----------|--------|----------|----------|-------|----------|----------|
| GP    | 127.0866 | 155.0815 | GPP    | 224.1394 | 252.1343 | GPPE  | 353.1819 | 381.1769 |
| GPPEF | 500.2504 | 528.2453 | GPPEFE | 629.2930 | 657.2879 | PP    | 167.1179 | 195.1128 |
| PPE   | 296.1605 | 324.1554 | PPEF   | 443.2289 | 471.2238 | PPEFE | 572.2715 | 600.2664 |

|       |          |          |        |          |          |        |          |          |
|-------|----------|----------|--------|----------|----------|--------|----------|----------|
| PE    | 199.1077 | 227.1026 | PEF    | 346.1761 | 374.1710 | PEFE   | 475.2187 | 503.2136 |
| PEFEQ | 603.2773 | 631.2722 | EF     | 249.1234 | 277.1183 | EFE    | 378.1660 | 406.1609 |
| EFEQ  | 506.2245 | 534.2195 | EFEQP  | 603.2773 | 631.2722 | FE     | 249.1234 | 277.1183 |
| FEQ   | 377.1819 | 405.1769 | FEQP   | 474.2347 | 502.2296 | FEQPK  | 602.3297 | 630.3246 |
| EQ    | 230.1135 | 258.1084 | EQP    | 327.1663 | 355.1612 | EQPK   | 455.2613 | 483.2562 |
| EQPKM | 602.2967 | 630.2916 | QP     | 198.1237 | 226.1186 | QPK    | 326.2187 | 354.2136 |
| QPKM  | 473.2541 | 501.2490 | QPKMT  | 574.3017 | 602.2967 | QPKMTI | 687.3858 | 715.3807 |
| PK    | 198.1601 | 226.1550 | PKM    | 345.1955 | 373.1904 | PKMT   | 446.2432 | 474.2381 |
| PKMTI | 559.3272 | 587.3221 | PKMTIE | 688.3698 | 716.3647 | KM     | 248.1427 | 276.1376 |
| KMT   | 349.1904 | 377.1853 | KMTI   | 462.2745 | 490.2694 | KMTIE  | 591.3171 | 619.3120 |
| MT    | 221.0954 | 249.0904 | MTI    | 334.1795 | 362.1744 | MTIE   | 463.2221 | 491.2170 |
| TI    | 187.1441 | 215.1390 | TIE    | 316.1867 | 344.1816 | IE     | 215.1390 | 243.1339 |

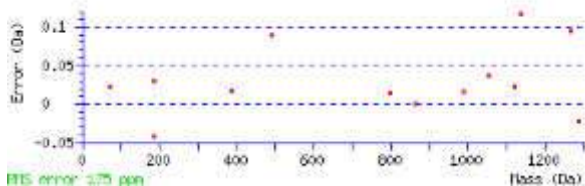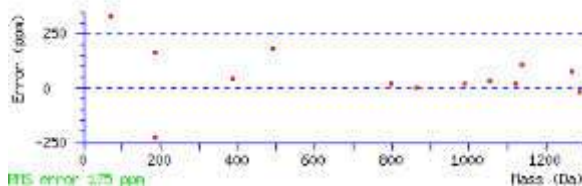

NCBI BLAST search of [EGPPEFEQPKMTIEK](#)

(Parameters: blastp, nr protein database, expect=20000, no filter, PAM30)

Other BLAST [web gateways](#)

#### All matches to this query

| Score | Mr(calc)  | Delta   | Sequence                            |
|-------|-----------|---------|-------------------------------------|
| 17.2  | 1774.8447 | 0.0157  | <a href="#">EGPPEFEQPKMTIEK</a>     |
| 6.2   | 1775.0067 | -0.1463 | <a href="#">AGIPGAAARPAGWRGVLR</a>  |
| 5.5   | 1774.8784 | -0.0180 | <a href="#">KNSTNMVAELENVHR</a>     |
| 4.8   | 1774.8355 | 0.0249  | <a href="#">OHMTHAOTRIMSFR</a>      |
| 4.8   | 1774.8771 | -0.0167 | <a href="#">MATETEYVVVAPVSNGGSK</a> |
| 4.8   | 1774.8905 | -0.0301 | <a href="#">RPHPPVAAPPMMRR</a>      |
| 4.8   | 1774.8957 | -0.0353 | <a href="#">QMDPINVETSLLLMR</a>     |
| 4.2   | 1774.9591 | -0.0987 | <a href="#">VVFINDERPOSROFR</a>     |
| 4.1   | 1774.9247 | -0.0643 | <a href="#">OMLEKVAELLASSNAR</a>    |
| 4.0   | 1774.9434 | -0.0829 | <a href="#">VIGMIPGMGKVSSAOIR</a>   |

Mascot: <http://www.matrixscience.com/>

**MATRIX SCIENCE Mascot Search Results**

**Peptide View Spot no 74**

MS/MS Fragmentation of **MGINPIMMSAGELESGNAGEPAK**

Found in **gi|8918361** in **NCBInr**, RuBisCO activase small isoform precursor [Oryza sativa]

Match to Query 62: 2351.097424 from(2352.104700,1+) intensity(0.0000) index(24)

Title: Label: L1, Spot\_Id: 219685, Peak\_List\_Id: 225097, MSMS Job\_Run\_Id: 21764, Comment:

Data file C:\Documents and Settings\Administrator\Desktop\farah BHU\spot set plate\Farah-Garima 11May 2013\ppw\_L1\_136842039200.txt

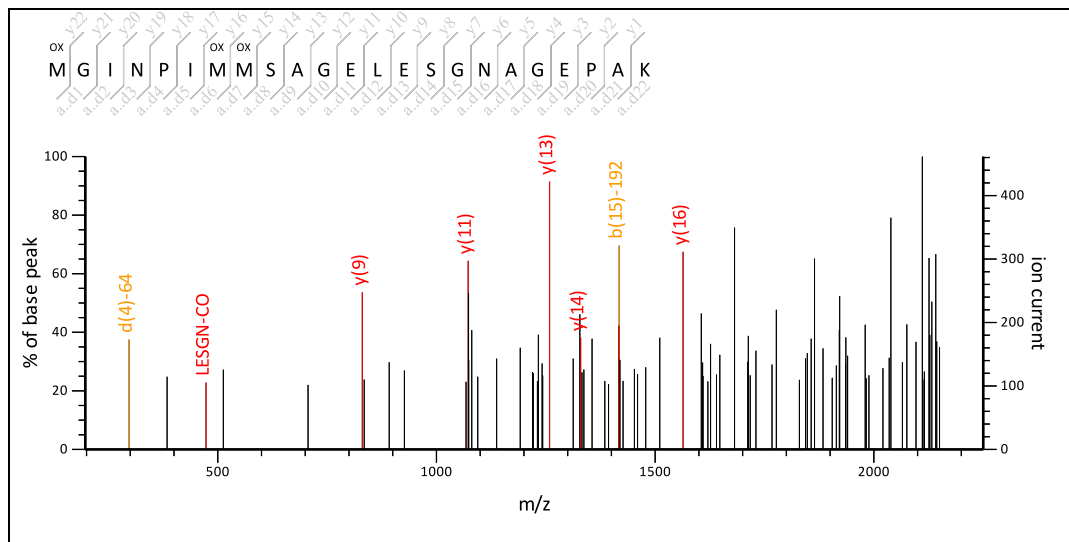

Navigation icons: Home, Back, Forward, Search, Print, Refresh. Search range: 197.22 to 2250.15.

Label all possible matches  Label matches used for scoring

Monoisotopic mass of neutral peptide Mr(calc): 2351.0443

Fixed modifications: Carbamidomethyl (C) (apply to specified residues or termini only)

Variable modifications:

M1 : Oxidation (M), with neutral losses 0.0000 (shown in table), 63.9983

M7 : Oxidation (M), with neutral losses 0.0000 (shown in table), 63.9983

M8 : Oxidation (M), with neutral losses 0.0000 (shown in table), 63.9983

Ions Score: 9 Expect: 1.6e+02

Matches : 13/653 fragment ions using 32 most intense peaks [\(help\)](#)

| #  | Immon.   | a         | a*        | a <sup>0</sup> | b         | b*        | b <sup>0</sup> | d         | d'       | Seq. | v         | w         | w'        | y         | y*        |
|----|----------|-----------|-----------|----------------|-----------|-----------|----------------|-----------|----------|------|-----------|-----------|-----------|-----------|-----------|
| 1  | 120.0478 | 120.0478  |           |                | 148.0427  |           |                | 44.0495   |          | M    |           |           |           |           |           |
| 2  | 30.0338  | 177.0692  |           |                | 205.0641  |           |                |           |          | G    |           |           |           | 2205.0162 | 2187.9897 |
| 3  | 86.0964  | 290.1533  |           |                | 318.1482  |           |                | 262.1220  | 276.1376 | I    | 2089.9165 | 2102.9369 | 2116.9525 | 2147.9947 | 2130.9682 |
| 4  | 87.0553  | 404.1962  | 387.1697  |                | 432.1911  | 415.1646  |                | 361.1904  |          | N    | 1975.8736 | 1974.8783 |           | 2034.9107 | 2017.8841 |
| 5  | 70.0651  | 501.2490  | 484.2224  |                | 529.2439  | 512.2173  |                | 475.2333  |          | P    | 1878.8208 | 1877.8256 |           | 1920.8678 | 1903.8412 |
| 6  | 86.0964  | 614.3330  | 597.3065  |                | 642.3280  | 625.3014  |                | 586.3017  | 600.3174 | I    | 1765.7367 | 1778.7571 | 1792.7728 | 1823.8150 | 1806.7884 |
| 7  | 120.0478 | 761.3684  | 744.3419  |                | 789.3634  | 772.3368  |                | 685.3702  |          | M    | 1618.7013 | 1617.7061 |           | 1710.7309 | 1693.7044 |
| 8  | 120.0478 | 908.4038  | 891.3773  |                | 936.3988  | 919.3722  |                | 832.4056  |          | M    | 1471.6659 | 1470.6707 |           | 1563.6955 | 1546.6690 |
| 9  | 60.0444  | 995.4359  | 978.4093  | 977.4253       | 1023.4308 | 1006.4042 | 1005.4202      | 979.4410  |          | S    | 1384.6339 | 1383.6387 |           | 1416.6601 | 1399.6336 |
| 10 | 44.0495  | 1066.4730 | 1049.4464 | 1048.4624      | 1094.4679 | 1077.4414 | 1076.4573      |           |          | A    | 1313.5968 |           |           | 1329.6281 | 1312.6016 |
| 11 | 30.0338  | 1123.4944 | 1106.4679 | 1105.4839      | 1151.4894 | 1134.4628 | 1133.4788      |           |          | G    |           |           |           | 1258.5910 | 1241.5644 |
| 12 | 102.0550 | 1252.5370 | 1235.5105 | 1234.5265      | 1280.5320 | 1263.5054 | 1262.5214      | 1194.5316 |          | E    | 1127.5327 | 1126.5375 |           | 1201.5695 | 1184.5430 |
| 13 | 86.0964  | 1365.6211 | 1348.5946 | 1347.6105      | 1393.6160 | 1376.5895 | 1375.6055      | 1323.5742 |          | L    | 1014.4487 | 1013.4534 |           | 1072.5269 | 1055.5004 |
| 14 | 102.0550 | 1494.6637 | 1477.6372 | 1476.6531      | 1522.6586 | 1505.6321 | 1504.6480      | 1436.6582 |          | E    | 885.4061  | 884.4108  |           | 959.4429  | 942.4163  |
| 15 | 60.0444  | 1581.6957 | 1564.6692 | 1563.6852      | 1609.6906 | 1592.6641 | 1591.6801      | 1565.7008 |          | S    | 798.3741  | 797.3788  |           | 830.4003  | 813.3737  |
| 16 | 30.0338  | 1638.7172 | 1621.6906 | 1620.7066      | 1666.7121 | 1649.6856 | 1648.7015      |           |          | G    |           |           |           | 743.3682  | 726.3417  |
| 17 | 87.0553  | 1752.7601 | 1735.7336 | 1734.7496      | 1780.7550 | 1763.7285 | 1762.7445      | 1709.7543 |          | N    | 627.3097  | 626.3144  |           | 686.3468  | 669.3202  |
| 18 | 44.0495  | 1823.7972 | 1806.7707 | 1805.7867      | 1851.7921 | 1834.7656 | 1833.7816      |           |          | A    | 556.2726  |           |           | 572.3039  | 555.2773  |
| 19 | 30.0338  | 1880.8187 | 1863.7921 | 1862.8081      | 1908.8136 | 1891.7871 | 1890.8030      |           |          | G    |           |           |           | 501.2667  | 484.2402  |
| 20 | 102.0550 | 2009.8613 | 1992.8347 | 1991.8507      | 2037.8562 | 2020.8297 | 2019.8456      | 1951.8558 |          | E    | 370.2085  | 369.2132  |           | 444.2453  | 427.2187  |

|    |          |           |           |           |           |           |           |           |  |  |   |          |          |  |          |          |
|----|----------|-----------|-----------|-----------|-----------|-----------|-----------|-----------|--|--|---|----------|----------|--|----------|----------|
| 21 | 70.0651  | 2106.9141 | 2089.8875 | 2088.9035 | 2134.9090 | 2117.8824 | 2116.8984 | 2080.8984 |  |  | P | 273.1557 | 272.1605 |  | 315.2027 | 298.1761 |
| 22 | 44.0495  | 2177.9512 | 2160.9246 | 2159.9406 | 2205.9461 | 2188.9195 | 2187.9355 |           |  |  | A | 202.1186 |          |  | 218.1499 | 201.1234 |
| 23 | 101.1073 |           |           |           |           |           |           |           |  |  | K | 74.0237  | 73.0284  |  | 147.1128 | 130.0863 |

| Seq    | ya       | yb       | Seq     | ya       | yb       | Seq      | ya       | yb       |
|--------|----------|----------|---------|----------|----------|----------|----------|----------|
| GI     | 143.1179 | 171.1128 | GIN     | 257.1608 | 285.1557 | GINP     | 354.2136 | 382.2085 |
| GINPI  | 467.2976 | 495.2926 | GINPIM  | 614.3330 | 642.3280 | IN       | 200.1394 | 228.1343 |
| INP    | 297.1921 | 325.1870 | INPI    | 410.2762 | 438.2711 | INPIM    | 557.3116 | 585.3065 |
| NP     | 184.1081 | 212.1030 | NPI     | 297.1921 | 325.1870 | NPIM     | 444.2275 | 472.2224 |
| NPIMM  | 591.2629 | 619.2578 | NPIMMS  | 678.2949 | 706.2899 | PI       | 183.1492 | 211.1441 |
| PIM    | 330.1846 | 358.1795 | PIMM    | 477.2200 | 505.2149 | PIMMS    | 564.2520 | 592.2469 |
| PIMMSA | 635.2891 | 663.2840 | PIMMSAG | 692.3106 | 720.3055 | IM       | 233.1318 | 261.1267 |
| IMM    | 380.1672 | 408.1621 | IMMS    | 467.1993 | 495.1942 | IMMSA    | 538.2364 | 566.2313 |
| IMMSAG | 595.2578 | 623.2527 | MM      | 267.0832 | 295.0781 | MMS      | 354.1152 | 382.1101 |
| MMSA   | 425.1523 | 453.1472 | MMSAG   | 482.1738 | 510.1687 | MMSAGE   | 611.2164 | 639.2113 |
| MS     | 207.0798 | 235.0747 | MSA     | 278.1169 | 306.1118 | MSAG     | 335.1384 | 363.1333 |
| MSAGE  | 464.1810 | 492.1759 | MSAGEL  | 577.2650 | 605.2599 | SA       | 131.0815 | 159.0764 |
| SAG    | 188.1030 | 216.0979 | SAGE    | 317.1456 | 345.1405 | SAGEL    | 430.2296 | 458.2245 |
| SAGELE | 559.2722 | 587.2671 | SAGELES | 646.3042 | 674.2992 | AG       | 101.0709 | 129.0659 |
| AGE    | 230.1135 | 258.1084 | AGEL    | 343.1976 | 371.1925 | AGELE    | 472.2402 | 500.2351 |
| AGELES | 559.2722 | 587.2671 | AGELESG | 616.2937 | 644.2886 | GE       | 159.0764 | 187.0713 |
| GEL    | 272.1605 | 300.1554 | GELE    | 401.2031 | 429.1980 | GELES    | 488.2351 | 516.2300 |
| GELESG | 545.2566 | 573.2515 | GELESGN | 659.2995 | 687.2944 | EL       | 215.1390 | 243.1339 |
| ELE    | 344.1816 | 372.1765 | ELES    | 431.2136 | 459.2086 | ELESG    | 488.2351 | 516.2300 |
| ELESGN | 602.2780 | 630.2729 | ELESGNA | 673.3151 | 701.3101 | LE       | 215.1390 | 243.1339 |
| LES    | 302.1710 | 330.1660 | LESG    | 359.1925 | 387.1874 | LESGN    | 473.2354 | 501.2304 |
| LESGNA | 544.2726 | 572.2675 | LESGNAG | 601.2940 | 629.2889 | ES       | 189.0870 | 217.0819 |
| ESG    | 246.1084 | 274.1034 | ESGN    | 360.1514 | 388.1463 | ESGNA    | 431.1885 | 459.1834 |
| ESGNAG | 488.2100 | 516.2049 | ESGNAGE | 617.2525 | 645.2475 | SG       | 117.0659 | 145.0608 |
| SGN    | 231.1088 | 259.1037 | SGNA    | 302.1459 | 330.1408 | SGNAG    | 359.1674 | 387.1623 |
| SGNAGE | 488.2100 | 516.2049 | SGNAGEP | 585.2627 | 613.2576 | SGNAGEPA | 656.2998 | 684.2947 |
| GN     | 144.0768 | 172.0717 | GNA     | 215.1139 | 243.1088 | GNAG     | 272.1353 | 300.1302 |
| GNAGE  | 401.1779 | 429.1728 | GNAGEP  | 498.2307 | 526.2256 | GNAGEPA  | 569.2678 | 597.2627 |
| NA     | 158.0924 | 186.0873 | NAG     | 215.1139 | 243.1088 | NAGE     | 344.1565 | 372.1514 |
| NAGEP  | 441.2092 | 469.2041 | NAGEPA  | 512.2463 | 540.2413 | AG       | 101.0709 | 129.0659 |
| AGE    | 230.1135 | 258.1084 | AGEP    | 327.1663 | 355.1612 | AGEPA    | 398.2034 | 426.1983 |
| GE     | 159.0764 | 187.0713 | GEP     | 256.1292 | 284.1241 | GEP      | 327.1663 | 355.1612 |
| EP     | 199.1077 | 227.1026 | EPA     | 270.1448 | 298.1397 | PA       | 141.1022 | 169.0972 |

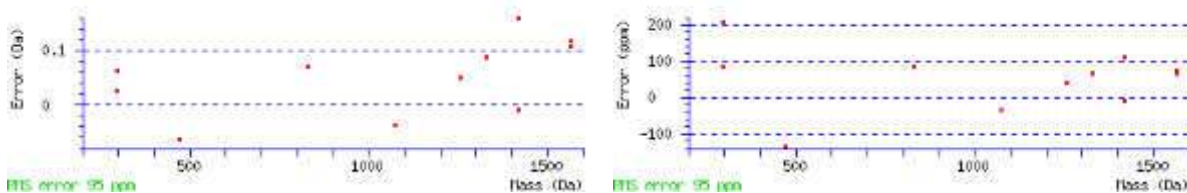

NCBI BLAST search of [MGINPIMMSAGELESGNAGEPAK](#)  
 (Parameters: blastp, nr protein database, expect=20000, no filter, PAM30)  
 Other BLAST [web gateways](#)

All matches to this query

| Score | Mr(calcd) | Delta  | Sequence                                |
|-------|-----------|--------|-----------------------------------------|
| 10.3  | 2351.0807 | 0.0168 | <a href="#">MGINLIMMSAGELESGNAGEPAK</a> |
| 8.8   | 2351.0443 | 0.0531 | <a href="#">MGINPIMMSAGELESGNAGEPAK</a> |
| 3.2   | 2351.0807 | 0.0168 | <a href="#">MGINLIMMSAGELESGNAGEPAK</a> |
| 1.8   | 2351.0807 | 0.0168 | <a href="#">MGINLIMMSAGELESGNAGEPAK</a> |

Mascot: <http://www.matrixscience.com/>



# MATRIX SCIENCE Mascot Search Results

## Peptide View **Spot no 81**

MS/MS Fragmentation of **YLTASAMFR**

Found in **gi|493725** in **NCBI**nr, beta tubulin [Oryza sativa Japonica Group]

Match to Query 3: 1058.621524 from(1059.628800,1+) intensity(0.0000) index(0)

Title: Label: E13, Spot\_Id: 216673, Peak\_List\_Id: 221751, MSMS Job\_Run\_Id: 21390, Comment:

Data file C:\Documents and Settings\Administrator\Desktop\farah BHU\Cotton leaves\RAJESH\12-1-13

raj\ppw\_E13\_136117700900.txt

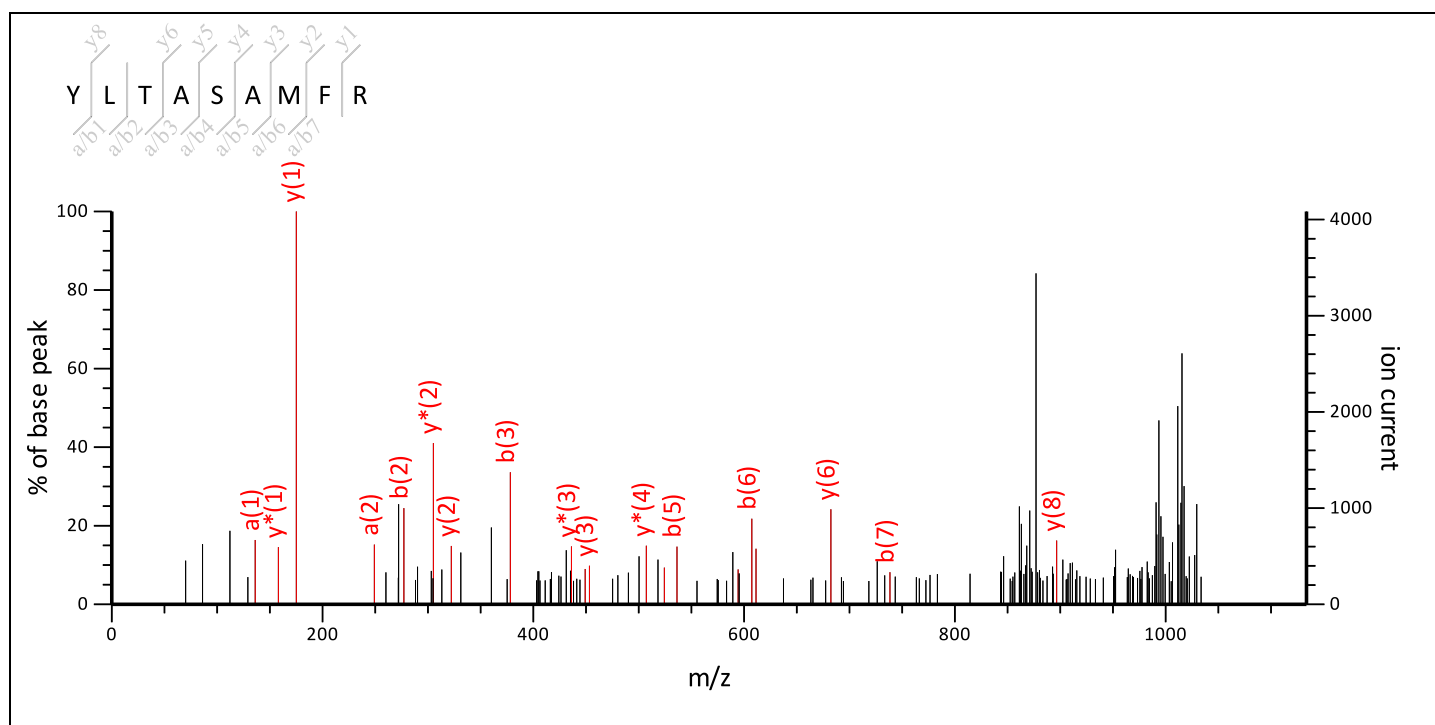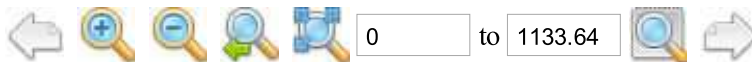

Label all possible matches  Label matches used for scoring

**Monoisotopic mass of neutral peptide Mr(calc):** 1058.5219

**Fixed modifications:** Carbamidomethyl (C) (apply to specified residues or termini only)

**Ions Score:** 29 **Expect:** 7.9

**Matches :** 20/32 fragment ions using 48 most intense peaks ([help](#))

| # | a        | b        | Seq. | y        | y*       | # |
|---|----------|----------|------|----------|----------|---|
| 1 | 136.0757 | 164.0706 | Y    |          |          | 9 |
| 2 | 249.1598 | 277.1547 | L    | 896.4659 | 879.4393 | 8 |
| 3 | 350.2074 | 378.2023 | T    | 783.3818 | 766.3552 | 7 |
| 4 | 421.2445 | 449.2395 | A    | 682.3341 | 665.3076 | 6 |
| 5 | 508.2766 | 536.2715 | S    | 611.2970 | 594.2704 | 5 |
| 6 | 579.3137 | 607.3086 | A    | 524.2650 | 507.2384 | 4 |
| 7 | 710.3542 | 738.3491 | M    | 453.2279 | 436.2013 | 3 |
| 8 | 857.4226 | 885.4175 | F    | 322.1874 | 305.1608 | 2 |

|   |  |  |   |          |          |   |
|---|--|--|---|----------|----------|---|
| 9 |  |  | R | 175.1190 | 158.0924 | 1 |
|---|--|--|---|----------|----------|---|

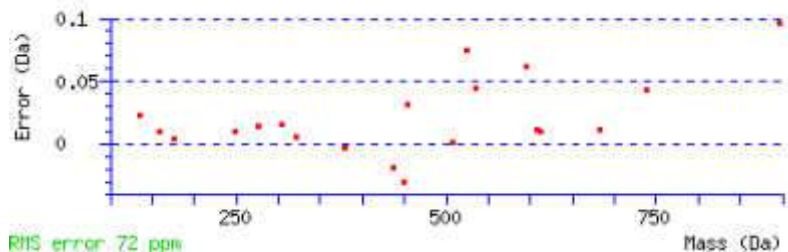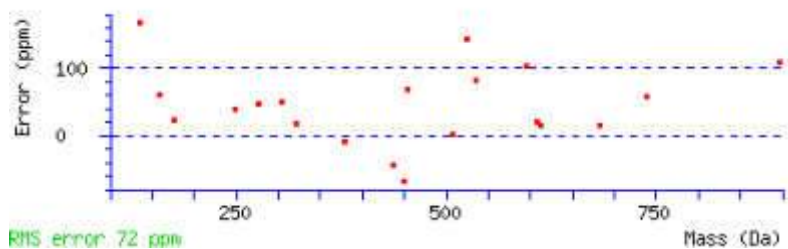

NCBI BLAST search of [YLTASAMFR](#)

(Parameters: blastp, nr protein database, expect=20000, no filter, PAM30)

Other BLAST [web gateways](#)

#### All matches to this query

| Score | Mr(calc)  | Delta   | Sequence                   |
|-------|-----------|---------|----------------------------|
| 29.1  | 1058.5219 | 0.0996  | <a href="#">YLTASAMFR</a>  |
| 9.8   | 1057.5080 | 1.1135  | <a href="#">YIETGAYGGK</a> |
| 7.9   | 1059.6223 | -1.0007 | <a href="#">AILRVSVMR</a>  |
| 7.9   | 1059.5495 | -0.9280 | <a href="#">SPIRTPSMR</a>  |
| 6.1   | 1058.5873 | 0.0343  | <a href="#">YLTSALVHR</a>  |
| 5.7   | 1058.5185 | 0.1030  | <a href="#">YDVFEVNER</a>  |
| 5.7   | 1058.5549 | 0.0666  | <a href="#">YTLVFNER</a>   |
| 5.7   | 1058.5219 | 0.0996  | <a href="#">YITMNEVR</a>   |
| 5.4   | 1059.5349 | -0.9134 | <a href="#">SPPPSEPPPR</a> |
| 5.4   | 1058.5873 | 0.0343  | <a href="#">IYTSVAHLR</a>  |

Mascot: <http://www.matrixscience.com/>



# MATRIX SCIENCE Mascot Search Results

## Peptide View **Spot no 81**

MS/MS Fragmentation of **LAVNLIPFPR**

Found in **gi|493725** in **NCBI nr**, beta tubulin [Oryza sativa Japonica Group]

Match to Query 8: 1138.786824 from(1139.794100,1+) intensity(0.0000) index(2)

Title: Label: E13, Spot\_Id: 216673, Peak\_List\_Id: 221744, MSMS Job\_Run\_Id: 21390, Comment:

Data file C:\Documents and Settings\Administrator\Desktop\farah BHU\Cotton leaves\RAJESH\12-1-13

raj\ppw\_E13\_136117700900.txt

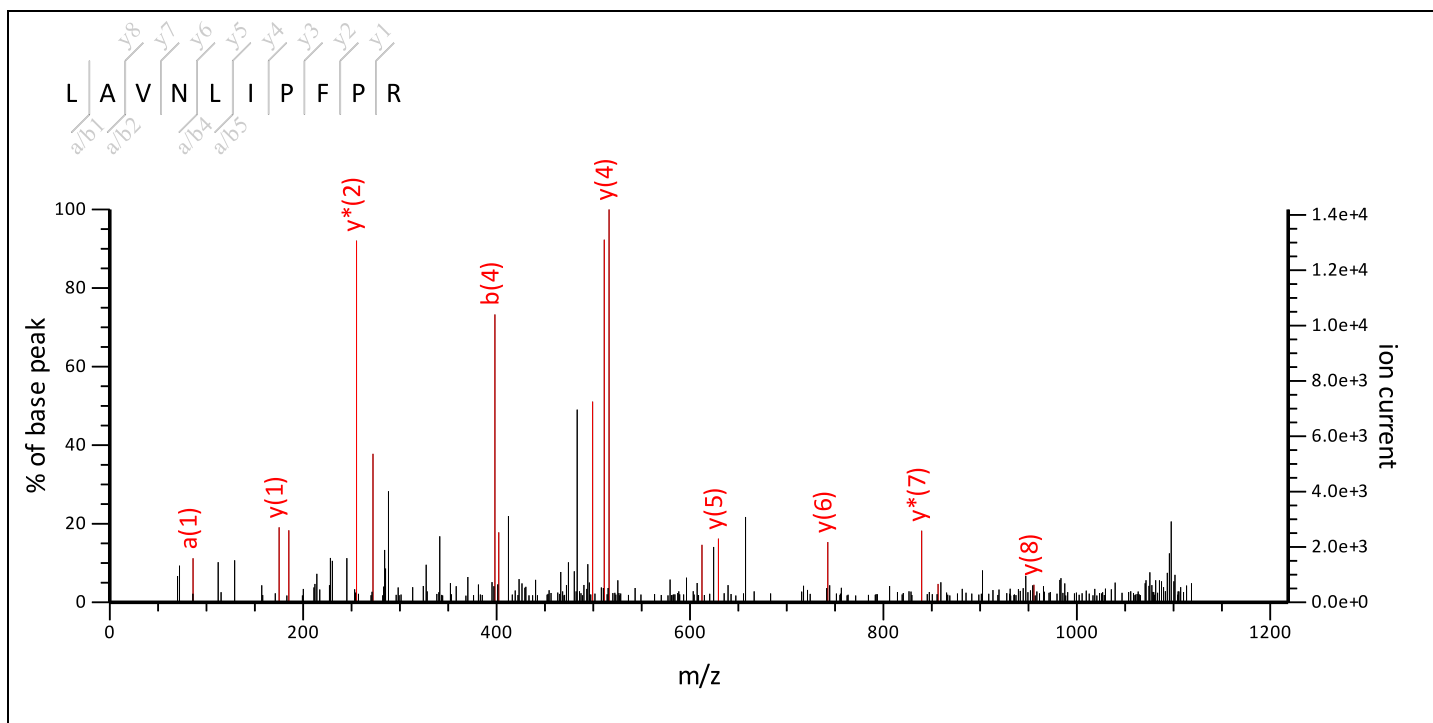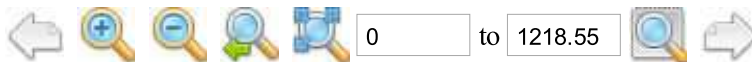

Label all possible matches  Label matches used for scoring

**Monoisotopic mass of neutral peptide Mr(calc):** 1138.6862

**Fixed modifications:** Carbamidomethyl (C) (apply to specified residues or termini only)

**Ions Score:** 37 **Expect:** 0.81

**Matches :** 16/48 fragment ions using 33 most intense peaks ([help](#))

| # | a        | a*       | b        | b*       | Seq. | y         | y*        | #  |
|---|----------|----------|----------|----------|------|-----------|-----------|----|
| 1 | 86.0964  |          | 114.0913 |          | L    |           |           | 10 |
| 2 | 157.1335 |          | 185.1285 |          | A    | 1026.6095 | 1009.5829 | 9  |
| 3 | 256.2020 |          | 284.1969 |          | V    | 955.5724  | 938.5458  | 8  |
| 4 | 370.2449 | 353.2183 | 398.2398 | 381.2132 | N    | 856.5039  | 839.4774  | 7  |
| 5 | 483.3289 | 466.3024 | 511.3239 | 494.2973 | L    | 742.4610  | 725.4345  | 6  |
| 6 | 596.4130 | 579.3865 | 624.4079 | 607.3814 | I    | 629.3770  | 612.3504  | 5  |
| 7 | 693.4658 | 676.4392 | 721.4607 | 704.4341 | P    | 516.2929  | 499.2663  | 4  |
| 8 | 840.5342 | 823.5076 | 868.5291 | 851.5026 | F    | 419.2401  | 402.2136  | 3  |

|    |          |          |          |          |   |          |          |   |
|----|----------|----------|----------|----------|---|----------|----------|---|
| 9  | 937.5870 | 920.5604 | 965.5819 | 948.5553 | P | 272.1717 | 255.1452 | 2 |
| 10 |          |          |          |          | R | 175.1190 | 158.0924 | 1 |

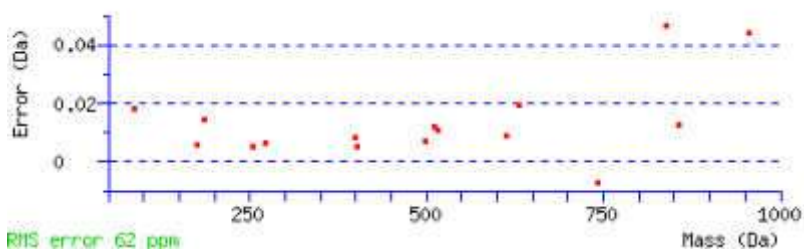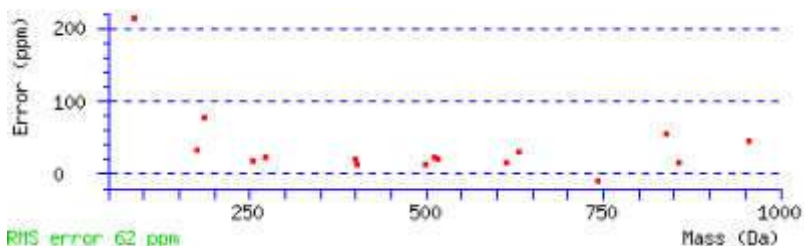

NCBI BLAST search of [LAVNLIPFPR](#)

(Parameters: blastp, nr protein database, expect=20000, no filter, PAM30)

Other BLAST [web gateways](#)

#### All matches to this query

| Score | Mr(calc)  | Delta  | Sequence                    |
|-------|-----------|--------|-----------------------------|
| 37.3  | 1138.6862 | 0.1006 | <a href="#">LAVNLIPFPR</a>  |
| 37.3  | 1138.6862 | 0.1006 | <a href="#">LAVNLIPFPR</a>  |
| 26.0  | 1138.7074 | 0.0794 | <a href="#">GVLQILLDLR</a>  |
| 23.7  | 1138.6935 | 0.0934 | <a href="#">ARGILLNGAVR</a> |
| 21.7  | 1137.6618 | 1.1250 | <a href="#">RALASSAIPPR</a> |
| 19.5  | 1138.6281 | 0.1587 | <a href="#">RSPAVLMPPR</a>  |
| 18.3  | 1137.6658 | 1.1210 | <a href="#">LVWKTAAPPR</a>  |
| 18.1  | 1137.6870 | 1.0998 | <a href="#">LVSQVLLNPR</a>  |
| 17.6  | 1137.7274 | 1.0594 | <a href="#">LAVILIPFPR</a>  |
| 16.7  | 1138.6281 | 0.1588 | <a href="#">RAADPLMLR</a>   |

Mascot: <http://www.matrixscience.com/>



# Mascot Search Results

## Peptide View **Spot no 81**

MS/MS Fragmentation of **FPGQLNSDLR**

Found in **gi|493725** in **NCBI nr**, beta tubulin [Oryza sativa Japonica Group]

Match to Query 10: 1145.690824 from(1146.698100,1+) intensity(0.0000) index(3)

Title: Label: E13, Spot\_Id: 216673, Peak\_List\_Id: 221745, MSMS Job\_Run\_Id: 21390, Comment:

Data file C:\Documents and Settings\Administrator\Desktop\farah BHU\Cotton leaves\RAJESH\12-1-13

raj\ppw\_E13\_136117700900.txt

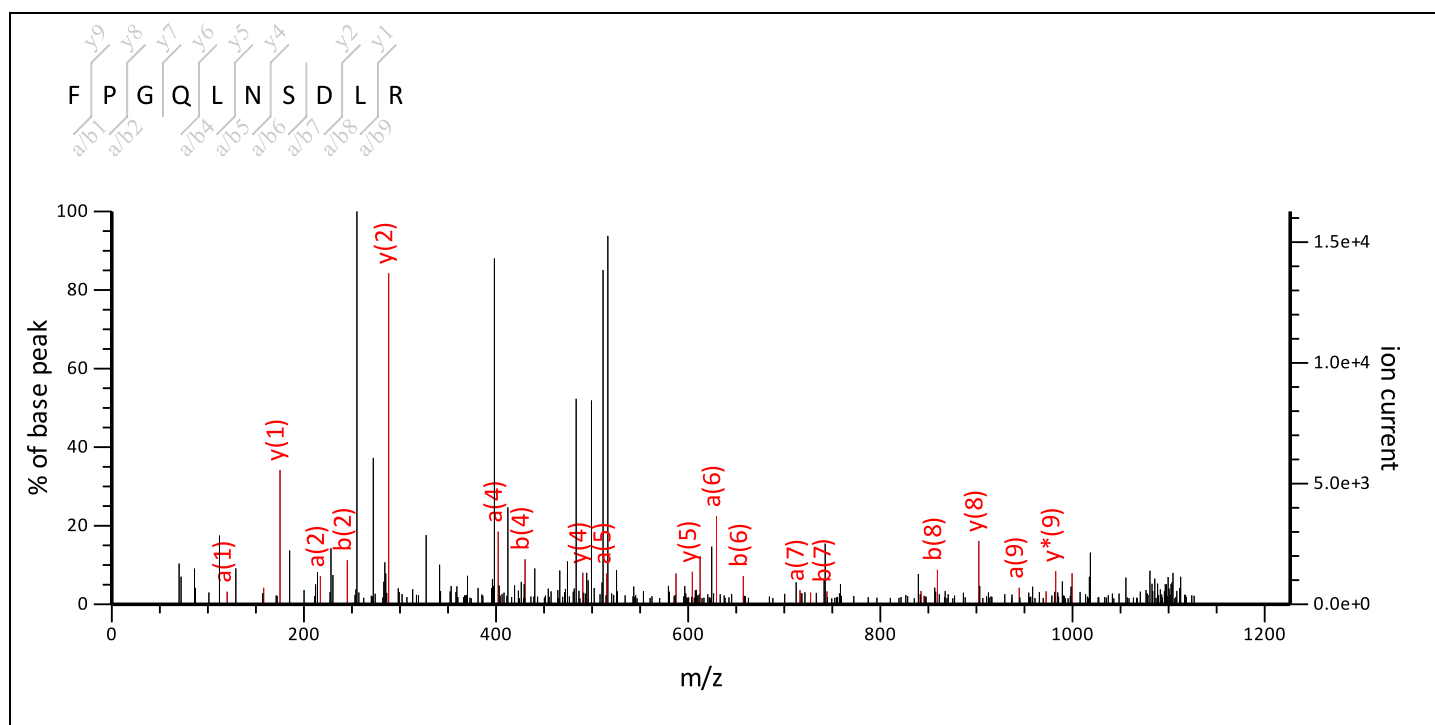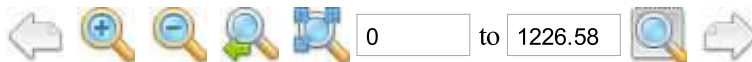

Label all possible matches  Label matches used for scoring

**Monoisotopic mass of neutral peptide Mr(calc):** 1145.5829

**Fixed modifications:** Carbamidomethyl (C) (apply to specified residues or termini only)

**Ions Score:** 18 **Expect:** 1e+02

**Matches :** 27/48 fragment ions using 110 most intense peaks ([help](#))

| # | a               | a*       | b               | b*              | Seq.     | y               | y*              | #         |
|---|-----------------|----------|-----------------|-----------------|----------|-----------------|-----------------|-----------|
| 1 | <b>120.0808</b> |          | 148.0757        |                 | <b>F</b> |                 |                 | <b>10</b> |
| 2 | <b>217.1335</b> |          | <b>245.1285</b> |                 | <b>P</b> | <b>999.5218</b> | <b>982.4952</b> | <b>9</b>  |
| 3 | 274.1550        |          | 302.1499        |                 | <b>G</b> | <b>902.4690</b> | 885.4425        | <b>8</b>  |
| 4 | <b>402.2136</b> | 385.1870 | <b>430.2085</b> | 413.1819        | <b>Q</b> | <b>845.4476</b> | 828.4210        | <b>7</b>  |
| 5 | <b>515.2976</b> | 498.2711 | 543.2926        | 526.2660        | <b>L</b> | <b>717.3890</b> | 700.3624        | <b>6</b>  |
| 6 | <b>629.3406</b> | 612.3140 | <b>657.3355</b> | 640.3089        | <b>N</b> | <b>604.3049</b> | <b>587.2784</b> | <b>5</b>  |
| 7 | <b>716.3726</b> | 699.3461 | <b>744.3675</b> | <b>727.3410</b> | <b>S</b> | <b>490.2620</b> | 473.2354        | <b>4</b>  |
| 8 | 831.3995        | 814.3730 | <b>859.3945</b> | <b>842.3679</b> | <b>D</b> | 403.2300        | 386.2034        | <b>3</b>  |

|    |          |          |          |          |   |          |          |   |
|----|----------|----------|----------|----------|---|----------|----------|---|
| 9  | 944.4836 | 927.4571 | 972.4785 | 955.4520 | L | 288.2030 | 271.1765 | 2 |
| 10 |          |          |          |          | R | 175.1190 | 158.0924 | 1 |

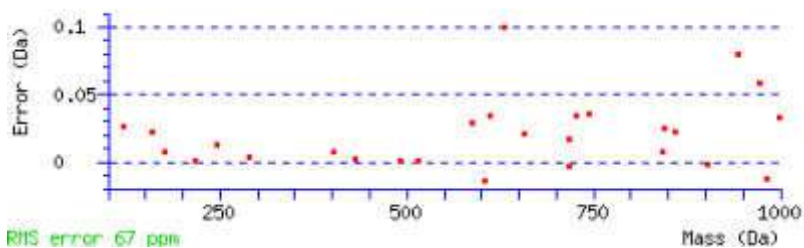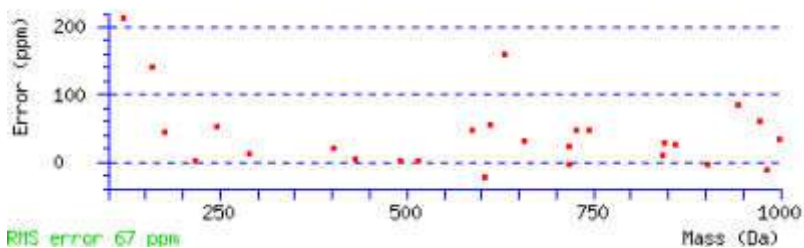

NCBI **BLAST** search of [FPGQLNSDLR](#)

(Parameters: blastp, nr protein database, expect=20000, no filter, PAM30)

Other BLAST [web gateways](#)

#### All matches to this query

| Score | Mr(calc)  | Delta   | Sequence                      |
|-------|-----------|---------|-------------------------------|
| 24.1  | 1145.5750 | 0.1158  | <a href="#">EDCLLEVL</a> R    |
| 17.9  | 1145.6193 | 0.0715  | <a href="#">FPGKLNSDL</a> R   |
| 17.9  | 1145.5829 | 0.1079  | <a href="#">FPGQLNSDL</a> R   |
| 16.8  | 1144.5611 | 1.1297  | <a href="#">LAALGGEEEE</a> K  |
| 16.1  | 1144.6386 | 1.0522  | <a href="#">AIVRAISO</a> CK   |
| 15.9  | 1144.5975 | 1.0933  | <a href="#">IAGAVVEETE</a> K  |
| 15.1  | 1145.6114 | 0.0794  | <a href="#">MGEALLVEL</a> R   |
| 14.4  | 1144.6452 | 1.0456  | <a href="#">GAVVLATAGG</a> TK |
| 13.9  | 1145.6768 | 0.0140  | <a href="#">KLLQSSTI</a> R    |
| 13.4  | 1146.5161 | -0.8253 | <a href="#">EDCLNMLP</a> R    |

Mascot: <http://www.matrixscience.com/>

# MATRIX SCIENCE Mascot Search Results

## Peptide View **Spot no 81**

MS/MS Fragmentation of **VSEQFTAMFR**

Found in **gi|493725** in **NCBI**nr, beta tubulin [Oryza sativa Japonica Group]

Match to Query 15: 1214.687224 from(1215.694500,1+) intensity(0.0000) index(5)

Title: Label: E13, Spot\_Id: 216673, Peak\_List\_Id: 221749, MSMS Job\_Run\_Id: 21390, Comment:

Data file C:\Documents and Settings\Administrator\Desktop\farah BHU\Cotton leaves\RAJESH\12-1-13

raj\ppw\_E13\_136117700900.txt

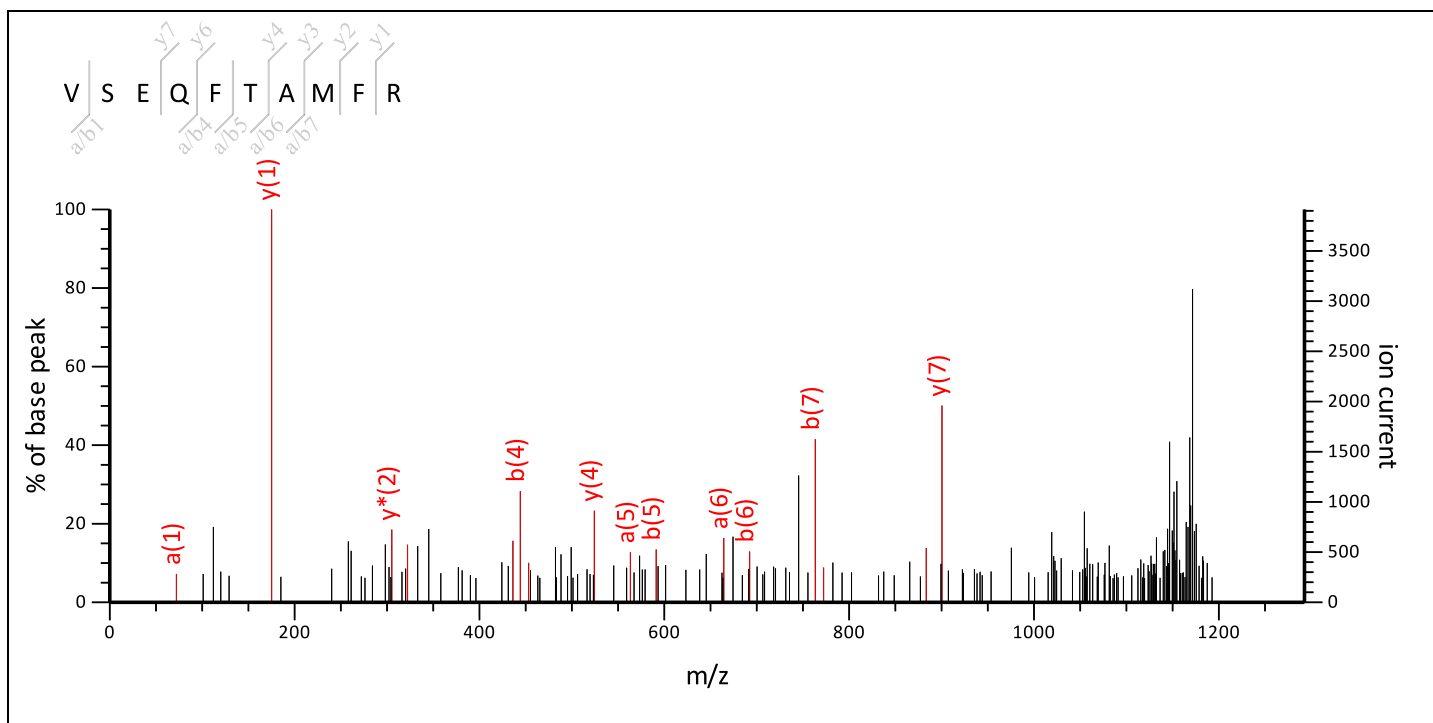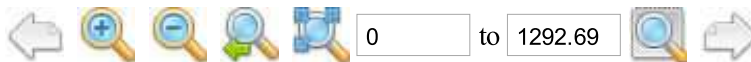

Label all possible matches  Label matches used for scoring

**Monoisotopic mass of neutral peptide Mr(calc):** 1214.5754

**Fixed modifications:** Carbamidomethyl (C) (apply to specified residues or termini only)

**Ions Score:** 18 **Expect:** 91

**Matches :** 16/48 fragment ions using 48 most intense peaks ([help](#))

| # | a               | a*       | b               | b*       | Seq. | y               | y*              | #  |
|---|-----------------|----------|-----------------|----------|------|-----------------|-----------------|----|
| 1 | <b>72.0808</b>  |          | 100.0757        |          | V    |                 |                 | 10 |
| 2 | 159.1128        |          | 187.1077        |          | S    | 1116.5143       | 1099.4877       | 9  |
| 3 | 288.1554        |          | 316.1503        |          | E    | 1029.4822       | 1012.4557       | 8  |
| 4 | 416.2140        | 399.1874 | <b>444.2089</b> | 427.1823 | Q    | <b>900.4396</b> | <b>883.4131</b> | 7  |
| 5 | <b>563.2824</b> | 546.2558 | <b>591.2773</b> | 574.2508 | F    | <b>772.3811</b> | 755.3545        | 6  |
| 6 | <b>664.3301</b> | 647.3035 | <b>692.3250</b> | 675.2984 | T    | 625.3126        | 608.2861        | 5  |
| 7 | 735.3672        | 718.3406 | <b>763.3621</b> | 746.3355 | A    | <b>524.2650</b> | 507.2384        | 4  |
| 8 | 866.4077        | 849.3811 | 894.4026        | 877.3760 | M    | <b>453.2279</b> | <b>436.2013</b> | 3  |

|    |           |          |           |           |   |                 |                 |   |
|----|-----------|----------|-----------|-----------|---|-----------------|-----------------|---|
| 9  | 1013.4761 | 996.4495 | 1041.4710 | 1024.4444 | F | <b>322.1874</b> | <b>305.1608</b> | 2 |
| 10 |           |          |           |           | R | <b>175.1190</b> | 158.0924        | 1 |

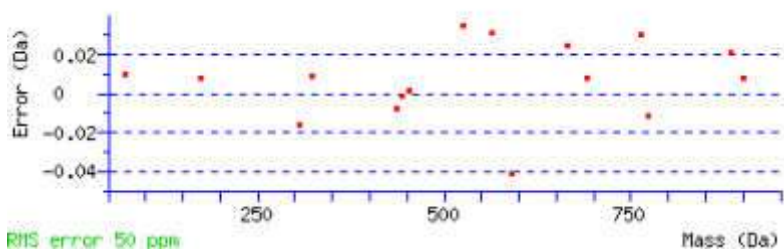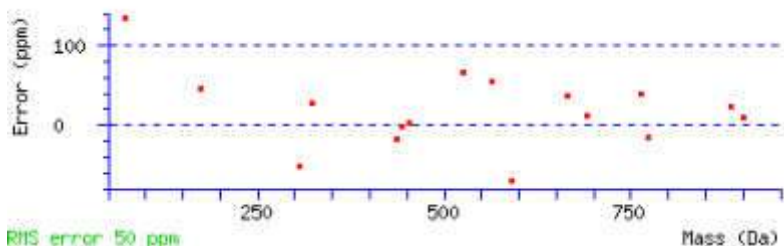

NCBI BLAST search of [VSEQFTAMFR](#)

(Parameters: blastp, nr protein database, expect=20000, no filter, PAM30)

Other BLAST [web gateways](#)

#### All matches to this query

| Score | Mr(calc)  | Delta   | Sequence                     |
|-------|-----------|---------|------------------------------|
| 20.7  | 1213.6568 | 1.0305  | <a href="#">GSIGHAFTVGIR</a> |
| 18.4  | 1214.6118 | 0.0755  | <a href="#">VSEKFTAMFR</a>   |
| 18.4  | 1214.5754 | 0.1118  | <a href="#">VSEQFTAMFR</a>   |
| 10.3  | 1213.5696 | 1.1176  | <a href="#">MGSCVGYLRR</a>   |
| 8.4   | 1215.6030 | -0.9158 | <a href="#">RESVSMTPGPR</a>  |
| 7.3   | 1213.5509 | 1.1363  | <a href="#">MANSKGSSNER</a>  |
| 7.3   | 1214.6996 | -0.0124 | <a href="#">NLHQAKVHLR</a>   |
| 7.3   | 1214.6924 | -0.0052 | <a href="#">YKLTWVHIR</a>    |
| 7.0   | 1214.6230 | 0.0642  | <a href="#">LYQMYGRLR</a>    |
| 6.8   | 1214.5390 | 0.1482  | <a href="#">GFAFEDGMGIR</a>  |

Mascot: <http://www.matrixscience.com/>



# Mascot Search Results

## Peptide View **Spot no 81**

MS/MS Fragmentation of **INVYYNEASGGR**

Found in **gi|493725** in **NCBI nr**, beta tubulin [Oryza sativa Japonica Group]

Match to Query 24: 1341.751424 from(1342.758700,1+) intensity(0.0000) index(8)

Title: Label: E13, Spot\_Id: 216673, Peak\_List\_Id: 221750, MSMS Job\_Run\_Id: 21390, Comment:

Data file C:\Documents and Settings\Administrator\Desktop\farah BHU\Cotton leaves\RAJESH\12-1-13

raj\ppw\_E13\_136117700900.txt

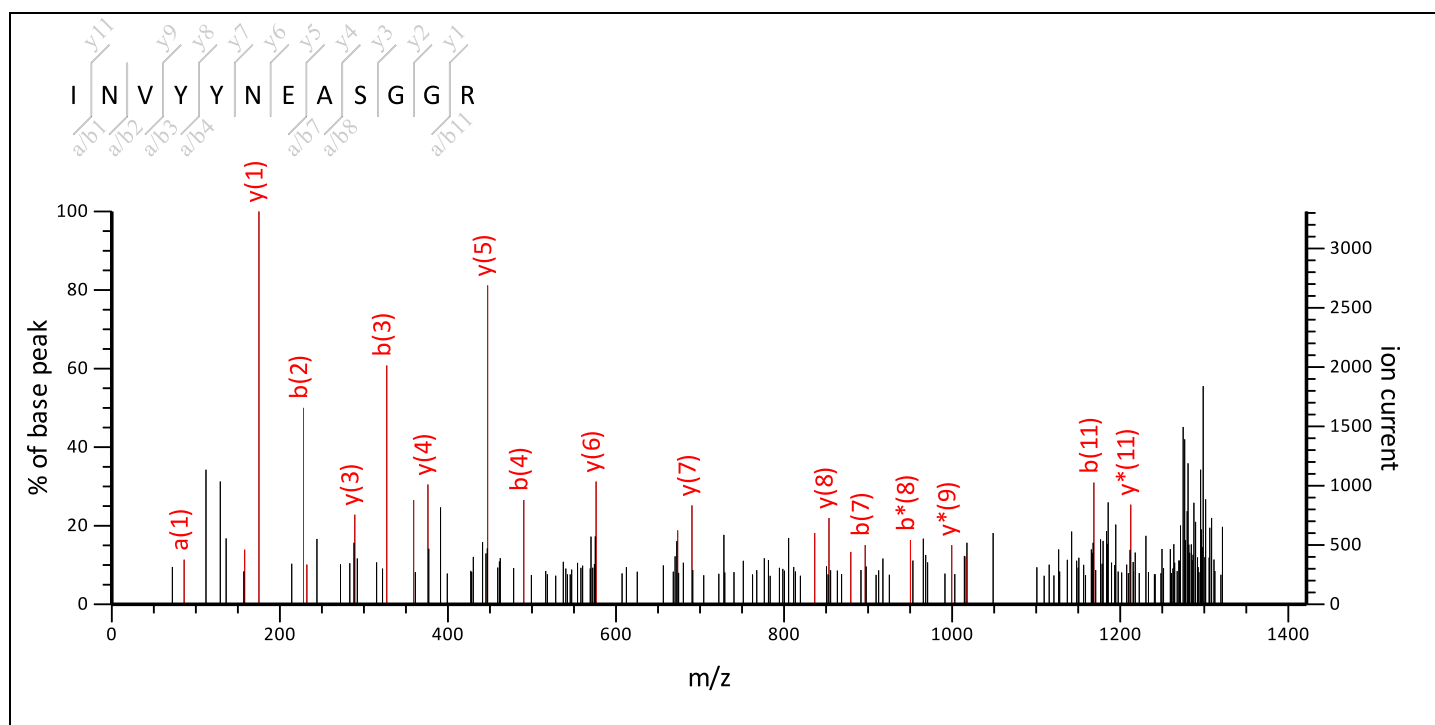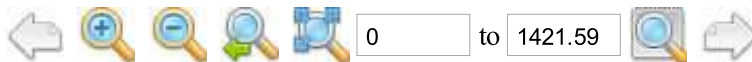

Label all possible matches  Label matches used for scoring

**Monoisotopic mass of neutral peptide Mr(calc):** 1341.6313

**Fixed modifications:** Carbamidomethyl (C) (apply to specified residues or termini only)

**Ions Score:** 35 **Expect:** 1.5

**Matches:** 23/64 fragment ions using 65 most intense peaks ([help](#))

| # | a        | a*       | b        | b*       | Seq. | y         | y*        | #  |
|---|----------|----------|----------|----------|------|-----------|-----------|----|
| 1 | 86.0964  |          | 114.0913 |          | I    |           |           | 12 |
| 2 | 200.1394 | 183.1128 | 228.1343 | 211.1077 | N    | 1229.5545 | 1212.5280 | 11 |
| 3 | 299.2078 | 282.1812 | 327.2027 | 310.1761 | V    | 1115.5116 | 1098.4851 | 10 |
| 4 | 462.2711 | 445.2445 | 490.2660 | 473.2395 | Y    | 1016.4432 | 999.4167  | 9  |
| 5 | 625.3344 | 608.3079 | 653.3293 | 636.3028 | Y    | 853.3799  | 836.3533  | 8  |
| 6 | 739.3774 | 722.3508 | 767.3723 | 750.3457 | N    | 690.3165  | 673.2900  | 7  |
| 7 | 868.4199 | 851.3934 | 896.4149 | 879.3883 | E    | 576.2736  | 559.2471  | 6  |
| 8 | 939.4571 | 922.4305 | 967.4520 | 950.4254 | A    | 447.2310  | 430.2045  | 5  |



|    |           |           |           |           |   |          |          |   |
|----|-----------|-----------|-----------|-----------|---|----------|----------|---|
| 9  | 1026.4891 | 1009.4625 | 1054.4840 | 1037.4575 | S | 376.1939 | 359.1674 | 4 |
| 10 | 1083.5105 | 1066.4840 | 1111.5055 | 1094.4789 | G | 289.1619 | 272.1353 | 3 |
| 11 | 1140.5320 | 1123.5055 | 1168.5269 | 1151.5004 | G | 232.1404 | 215.1139 | 2 |
| 12 |           |           |           |           | R | 175.1190 | 158.0924 | 1 |

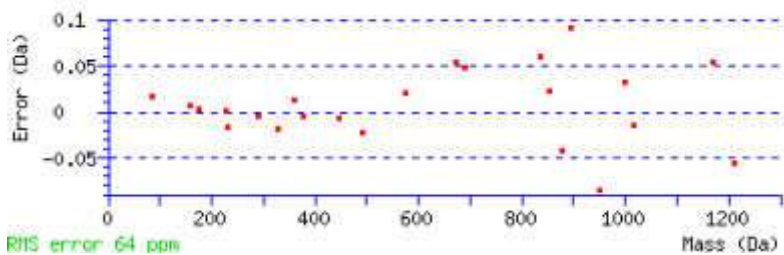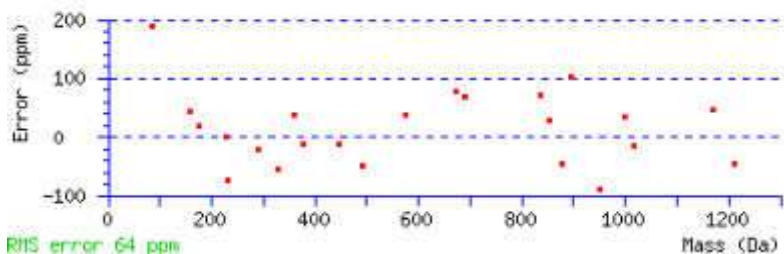

NCBI **BLAST** search of [INVYYNEASGGR](#)

(Parameters: blastp, nr protein database, expect=20000, no filter, PAM30)

Other BLAST [web gateways](#)

#### All matches to this query

| Score | Mr(calc)  | Delta   | Sequence                     |
|-------|-----------|---------|------------------------------|
| 35.5  | 1341.6313 | 0.1201  | <a href="#">INVYYNEASGGR</a> |
| 35.5  | 1341.6313 | 0.1201  | <a href="#">LNVYYNEASGGR</a> |
| 26.8  | 1342.6153 | -0.8639 | <a href="#">IDVYYNEASGGR</a> |
| 14.0  | 1342.7027 | -0.9513 | <a href="#">QVVDQIAVNAMR</a> |
| 12.6  | 1341.6499 | 0.1015  | <a href="#">QVVYMYPRDR</a>   |
| 9.6   | 1341.6612 | 0.0902  | <a href="#">KVOHCLSEWR</a>   |
| 8.9   | 1340.7776 | 0.9739  | <a href="#">QAATALLALSNR</a> |
| 8.8   | 1341.5877 | 0.1637  | <a href="#">YYYYLTGDER</a>   |
| 8.1   | 1341.7115 | 0.0399  | <a href="#">RVVDYFTALMK</a>  |
| 8.0   | 1341.5904 | 0.1610  | <a href="#">DSNASEMAKMK</a>  |

Mascot: <http://www.matrixscience.com/>

# MATRIX SCIENCE Mascot Search Results

## Peptide View **Spot no 81**

MS/MS Fragmentation of **RVSEQFTAMFR**

Found in **gi|493725** in **NCBI nr**, beta tubulin [Oryza sativa Japonica Group]

Match to Query 26: 1370.797124 from(1371.804400,1+) intensity(0.0000) index(9)

Title: Label: E13, Spot\_Id: 216673, Peak\_List\_Id: 221754, MSMS Job\_Run\_Id: 21390, Comment:

Data file C:\Documents and Settings\Administrator\Desktop\farah BHU\Cotton leaves\RAJESH\12-1-13

raj\ppw\_E13\_136117700900.txt

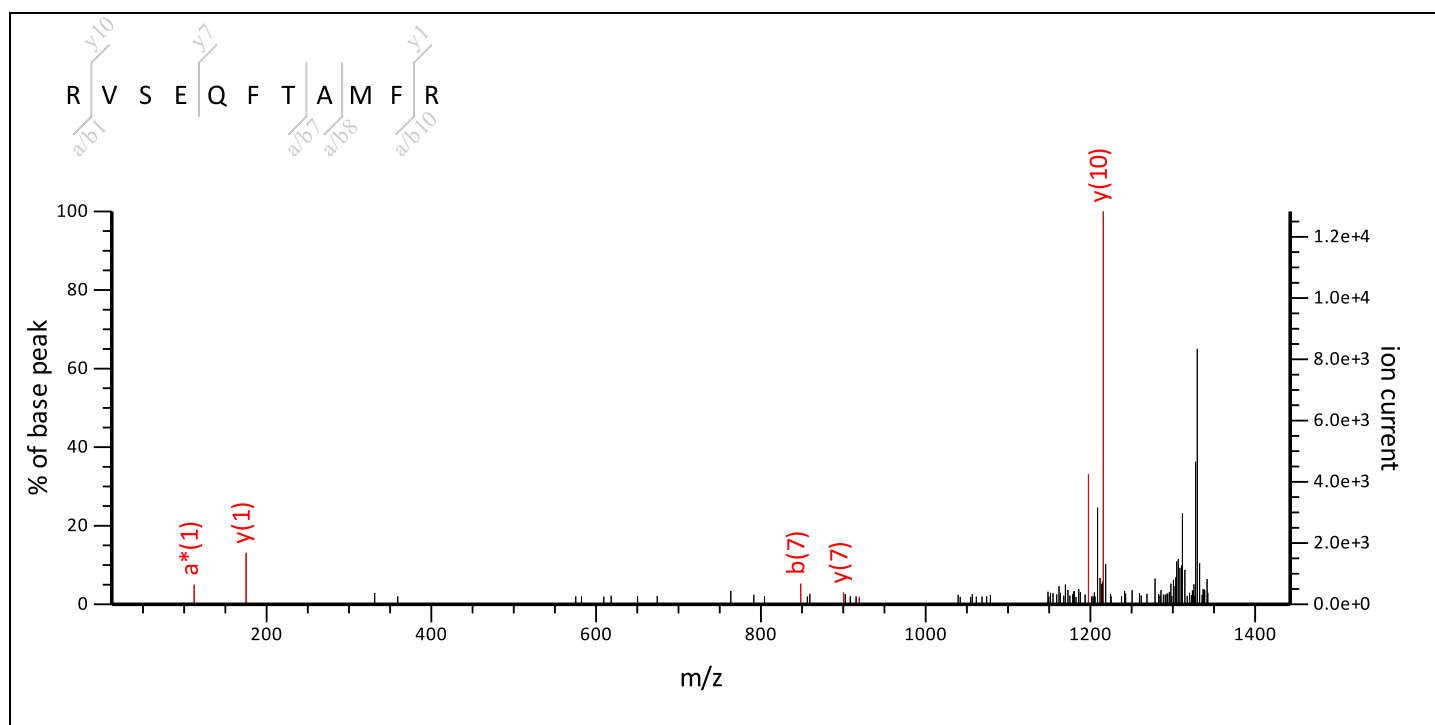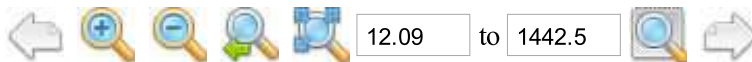

Label all possible matches  Label matches used for scoring

**Monoisotopic mass of neutral peptide Mr(calc):** 1370.6765

**Fixed modifications:** Carbamidomethyl (C) (apply to specified residues or termini only)

**Ions Score:** 7 **Expect:** 1e+03

**Matches:** 7/60 fragment ions using 22 most intense peaks ([help](#))

| # | a        | a*       | b        | b*       | Seq. | y         | y*        | #  |
|---|----------|----------|----------|----------|------|-----------|-----------|----|
| 1 | 129.1135 | 112.0869 | 157.1084 | 140.0818 | R    |           |           | 11 |
| 2 | 228.1819 | 211.1553 | 256.1768 | 239.1503 | V    | 1215.5827 | 1198.5561 | 10 |
| 3 | 315.2139 | 298.1874 | 343.2088 | 326.1823 | S    | 1116.5143 | 1099.4877 | 9  |
| 4 | 444.2565 | 427.2300 | 472.2514 | 455.2249 | E    | 1029.4822 | 1012.4557 | 8  |
| 5 | 572.3151 | 555.2885 | 600.3100 | 583.2835 | Q    | 900.4396  | 883.4131  | 7  |
| 6 | 719.3835 | 702.3569 | 747.3784 | 730.3519 | F    | 772.3811  | 755.3545  | 6  |
| 7 | 820.4312 | 803.4046 | 848.4261 | 831.3995 | T    | 625.3126  | 608.2861  | 5  |
| 8 | 891.4683 | 874.4417 | 919.4632 | 902.4367 | A    | 524.2650  | 507.2384  | 4  |

|    |           |           |                  |           |   |                 |          |   |
|----|-----------|-----------|------------------|-----------|---|-----------------|----------|---|
| 9  | 1022.5088 | 1005.4822 | 1050.5037        | 1033.4771 | M | 453.2279        | 436.2013 | 3 |
| 10 | 1169.5772 | 1152.5506 | <b>1197.5721</b> | 1180.5456 | F | 322.1874        | 305.1608 | 2 |
| 11 |           |           |                  |           | R | <b>175.1190</b> | 158.0924 | 1 |

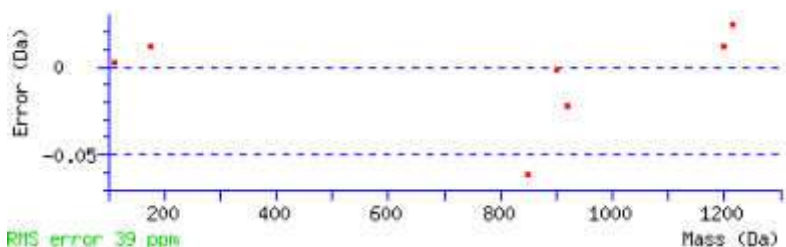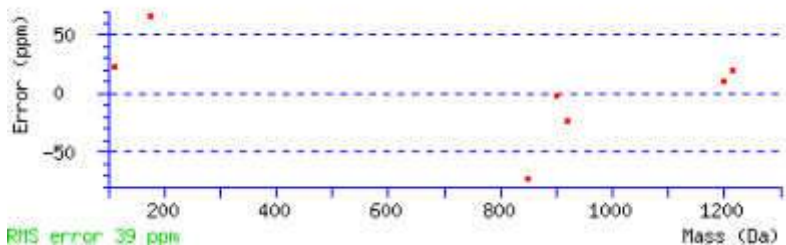

NCBI BLAST search of [RVSEQFTAMFR](#)

(Parameters: blastp, nr protein database, expect=20000, no filter, PAM30)

Other BLAST [web gateways](#)

#### All matches to this query

| Score | Mr(calc)  | Delta   | Sequence                     |
|-------|-----------|---------|------------------------------|
| 14.8  | 1370.6799 | 0.1173  | <a href="#">RMAFTMTATGIR</a> |
| 10.6  | 1370.6361 | 0.1610  | <a href="#">RSSTSVGFCTNR</a> |
| 8.3   | 1370.7168 | 0.0804  | <a href="#">VGPRPDTEGGGR</a> |
| 8.2   | 1370.7266 | 0.0705  | <a href="#">RGIIEOGLSDQR</a> |
| 8.2   | 1370.7266 | 0.0705  | <a href="#">RLLGQSVGEEQR</a> |
| 7.8   | 1370.7419 | 0.0553  | <a href="#">RHTEGTALALFR</a> |
| 7.3   | 1370.6765 | 0.1206  | <a href="#">RVSEQFTAMFR</a>  |
| 6.8   | 1370.8431 | -0.0460 | <a href="#">SSLALVMRLIIR</a> |
| 6.4   | 1370.7571 | 0.0400  | <a href="#">GVRWFQNPVLR</a>  |
| 6.4   | 1370.7419 | 0.0552  | <a href="#">VGVEPQFRNGLR</a> |

Mascot: <http://www.matrixscience.com/>

# MATRIX SCIENCE Mascot Search Results

## Peptide View **Spot no 81**

MS/MS Fragmentation of **LHFFMVGFAPLTSR**

Found in **gi|493725** in **NCBI nr**, beta tubulin [Oryza sativa Japonica Group]

Match to Query 46: 1621.986824 from(1622.994100,1+) intensity(0.0000) index(18)

Title: Label: E13, Spot\_Id: 216673, Peak\_List\_Id: 221756, MSMS Job\_Run\_Id: 21390, Comment:

Data file C:\Documents and Settings\Administrator\Desktop\farah BHU\Cotton leaves\RAJESH\12-1-13

raj\ppw\_E13\_136117700900.txt

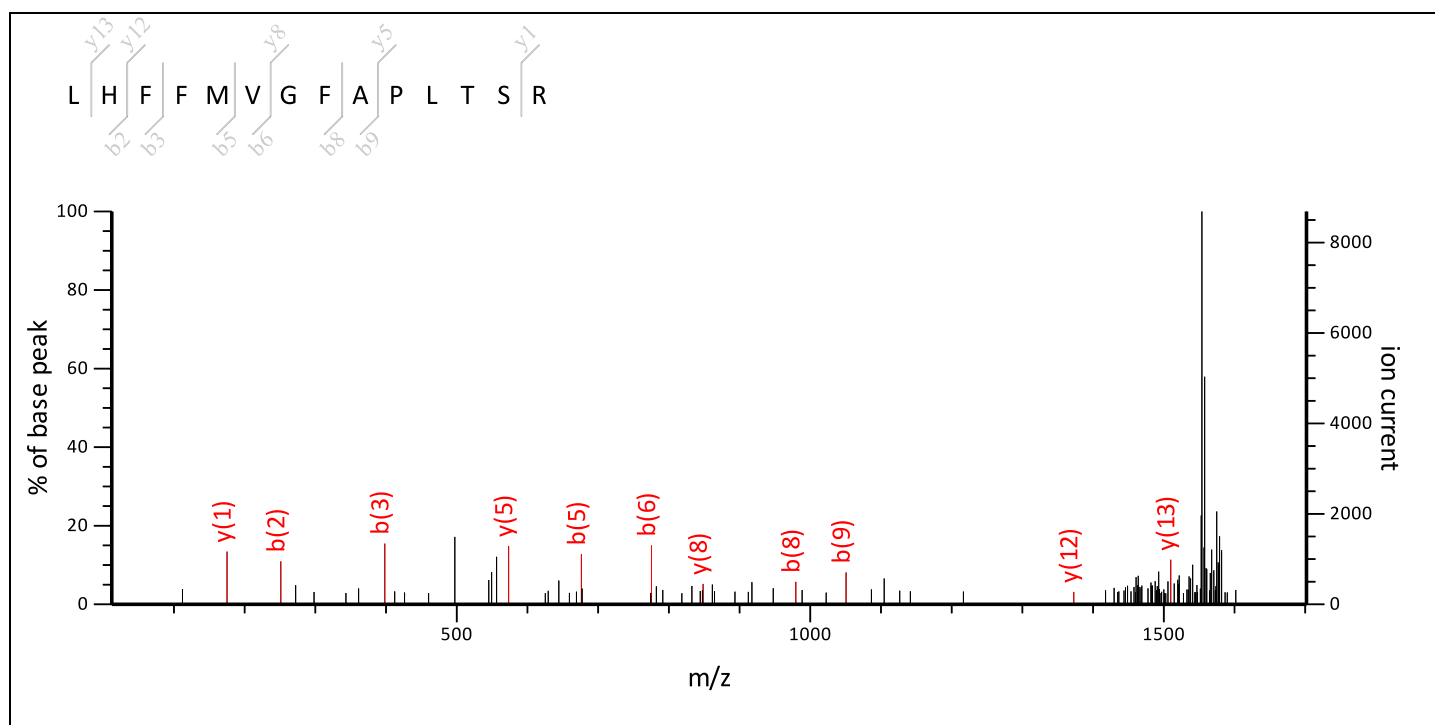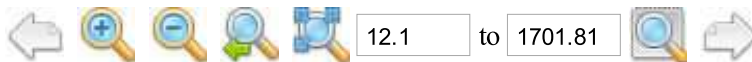

Label all possible matches  Label matches used for scoring

**Monoisotopic mass of neutral peptide Mr(calc):** 1621.8439

**Fixed modifications:** Carbamidomethyl (C) (apply to specified residues or termini only)

**Ions Score:** 45 **Expect:** 0.14

**Matches:** 11/52 fragment ions using 15 most intense peaks ([help](#))

| # | a        | b        | Seq. | y         | y*        | #  |
|---|----------|----------|------|-----------|-----------|----|
| 1 | 86.0964  | 114.0913 | L    |           |           | 14 |
| 2 | 223.1553 | 251.1503 | H    | 1509.7671 | 1492.7406 | 13 |
| 3 | 370.2238 | 398.2187 | F    | 1372.7082 | 1355.6817 | 12 |
| 4 | 517.2922 | 545.2871 | F    | 1225.6398 | 1208.6132 | 11 |
| 5 | 648.3326 | 676.3276 | M    | 1078.5714 | 1061.5448 | 10 |
| 6 | 747.4011 | 775.3960 | V    | 947.5309  | 930.5043  | 9  |
| 7 | 804.4225 | 832.4174 | G    | 848.4625  | 831.4359  | 8  |
| 8 | 951.4909 | 979.4859 | F    | 791.4410  | 774.4145  | 7  |

|    |           |                  |          |                 |          |          |
|----|-----------|------------------|----------|-----------------|----------|----------|
| 9  | 1022.5281 | <b>1050.5230</b> | <b>A</b> | 644.3726        | 627.3461 | <b>6</b> |
| 10 | 1119.5808 | 1147.5757        | <b>P</b> | <b>573.3355</b> | 556.3089 | <b>5</b> |
| 11 | 1232.6649 | 1260.6598        | <b>L</b> | 476.2827        | 459.2562 | <b>4</b> |
| 12 | 1333.7126 | 1361.7075        | <b>T</b> | 363.1987        | 346.1721 | <b>3</b> |
| 13 | 1420.7446 | 1448.7395        | <b>S</b> | 262.1510        | 245.1244 | <b>2</b> |
| 14 |           |                  | <b>R</b> | <b>175.1190</b> | 158.0924 | <b>1</b> |

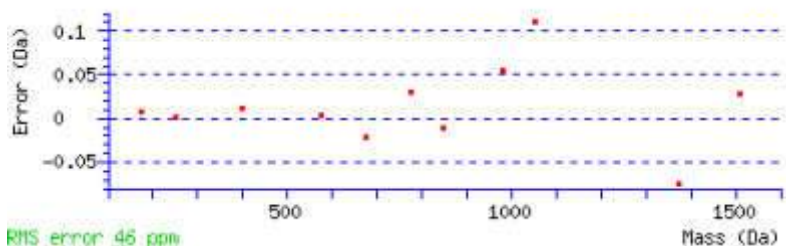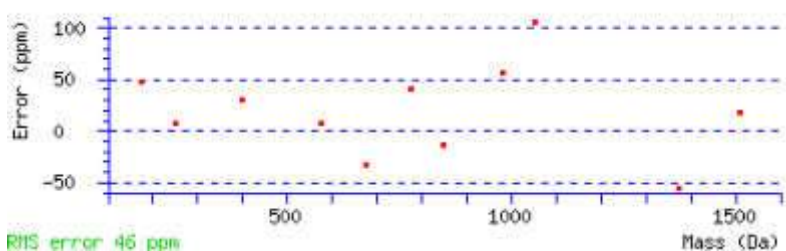

NCBI **BLAST** search of [LHFFMVGFAPLTSR](#)

(Parameters: blastp, nr protein database, expect=20000, no filter, PAM30)

Other BLAST [web gateways](#)

#### All matches to this query

| Score | Mr(calc)  | Delta   | Sequence                          |
|-------|-----------|---------|-----------------------------------|
| 44.8  | 1621.8439 | 0.1429  | <a href="#">LHFFMVGFAPLTSR</a>    |
| 11.7  | 1622.7649 | -0.7780 | <a href="#">NHGAPEVSGVSDEGLR</a>  |
| 11.3  | 1621.7518 | 0.2350  | <a href="#">LTIDGMOGNQNYPR</a>    |
| 9.9   | 1621.8075 | 0.1793  | <a href="#">LHPAMKPYEYAFR</a>     |
| 8.6   | 1621.9668 | 0.0200  | <a href="#">HLIALGFKVAVIEGR</a>   |
| 6.3   | 1621.7276 | 0.2593  | <a href="#">LHRCYMASMOGPR</a>     |
| 6.3   | 1621.7590 | 0.2278  | <a href="#">LASSNGSSAGNGGRMTR</a> |
| 6.1   | 1621.7121 | 0.2747  | <a href="#">EEKWDSSTSHFNR</a>     |
| 5.7   | 1622.8013 | -0.8144 | <a href="#">GGHSSLPPVDGSTAVSR</a> |
| 5.2   | 1621.7804 | 0.2065  | <a href="#">LLAKMMTTAGADPDR</a>   |

Mascot: <http://www.matrixscience.com/>

# MATRIX SCIENCE Mascot Search Results

## Peptide View **Spot no 81**

MS/MS Fragmentation of **AVLMDLEPGTMDSVR**

Found in **gi|493725** in **NCBIInr**, beta tubulin [Oryza sativa Japonica Group]

Match to Query 48: 1632.939624 from(1633.946900,1+) intensity(0.0000) index(19)

Title: Label: E13, Spot\_Id: 216673, Peak\_List\_Id: 221764, MSMS Job\_Run\_Id: 21390, Comment:

Data file C:\Documents and Settings\Administrator\Desktop\farah BHU\Cotton leaves\RAJESH\12-1-13

raj\ppw\_E13\_136117700900.txt

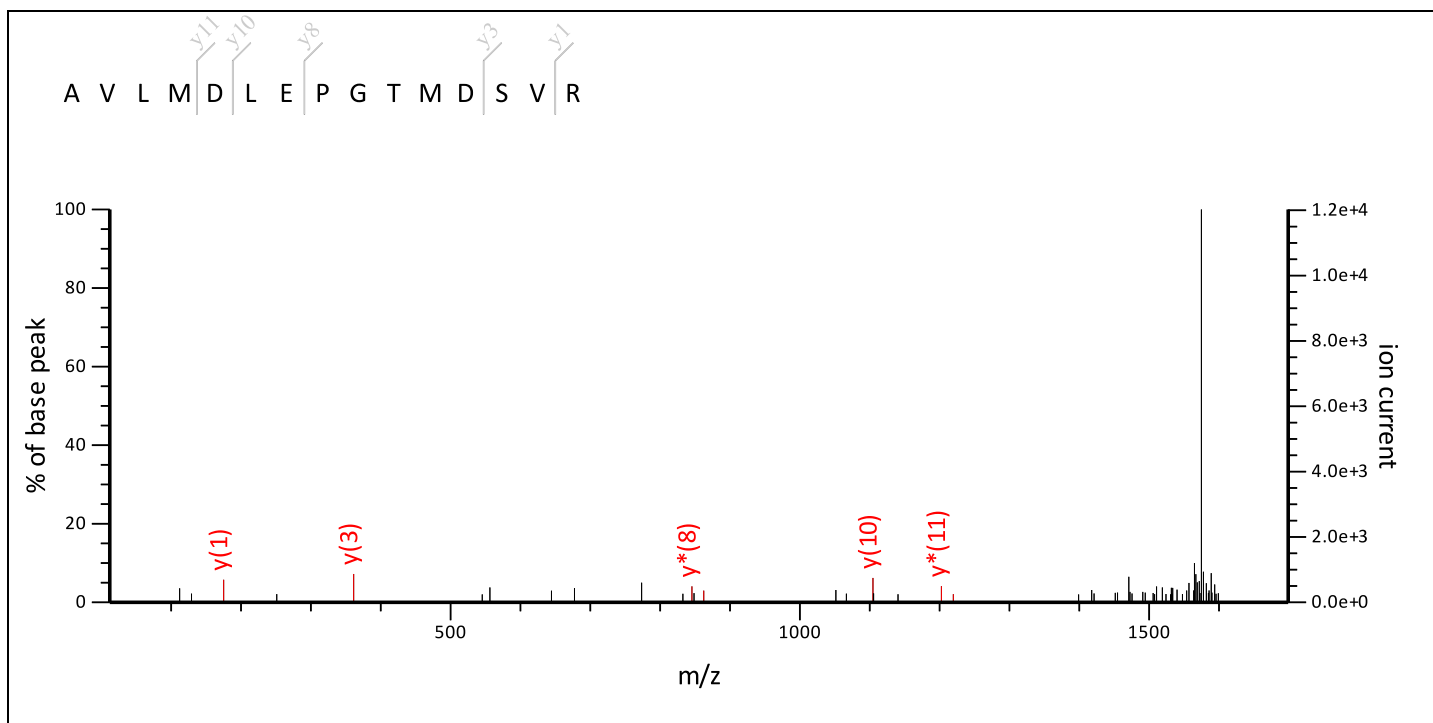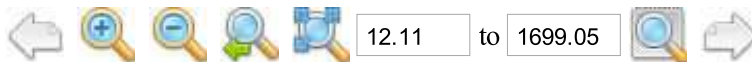

Label all possible matches  Label matches used for scoring

**Monoisotopic mass of neutral peptide Mr(calc):** 1632.7851

**Fixed modifications:** Carbamidomethyl (C) (apply to specified residues or termini only)

**Ions Score:** 11 **Expect:** 3.5e+02

**Matches :** 7/56 fragment ions using 21 most intense peaks ([help](#))

| # | a        | b        | Seq. | y                | y*               | #  |
|---|----------|----------|------|------------------|------------------|----|
| 1 | 44.0495  | 72.0444  | A    |                  |                  | 15 |
| 2 | 143.1179 | 171.1128 | V    | 1562.7553        | 1545.7287        | 14 |
| 3 | 256.2020 | 284.1969 | L    | 1463.6869        | 1446.6603        | 13 |
| 4 | 387.2424 | 415.2374 | M    | 1350.6028        | 1333.5763        | 12 |
| 5 | 502.2694 | 530.2643 | D    | <b>1219.5623</b> | <b>1202.5358</b> | 11 |
| 6 | 615.3534 | 643.3484 | L    | <b>1104.5354</b> | 1087.5088        | 10 |
| 7 | 744.3960 | 772.3910 | E    | 991.4513         | 974.4248         | 9  |
| 8 | 841.4488 | 869.4437 | P    | <b>862.4087</b>  | <b>845.3822</b>  | 8  |

|    |           |           |   |          |          |   |
|----|-----------|-----------|---|----------|----------|---|
| 9  | 898.4703  | 926.4652  | G | 765.3560 | 748.3294 | 7 |
| 10 | 999.5179  | 1027.5129 | T | 708.3345 | 691.3080 | 6 |
| 11 | 1130.5584 | 1158.5533 | M | 607.2868 | 590.2603 | 5 |
| 12 | 1245.5854 | 1273.5803 | D | 476.2463 | 459.2198 | 4 |
| 13 | 1332.6174 | 1360.6123 | S | 361.2194 | 344.1928 | 3 |
| 14 | 1431.6858 | 1459.6807 | V | 274.1874 | 257.1608 | 2 |
| 15 |           |           | R | 175.1190 | 158.0924 | 1 |

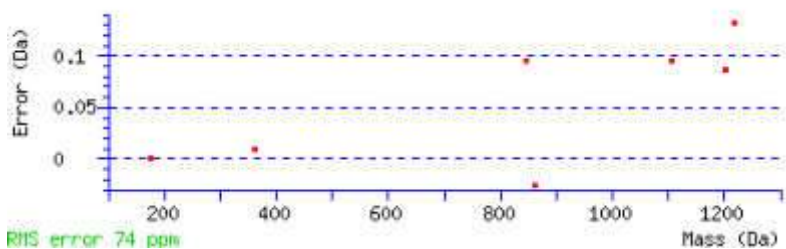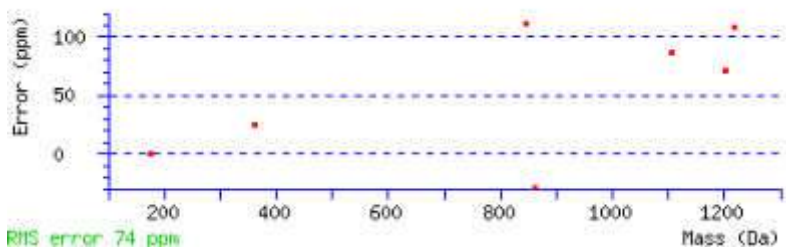

NCBI **BLAST** search of [AVLMDLEPGTMDSVR](#)

(Parameters: blastp, nr protein database, expect=20000, no filter, PAM30)

Other BLAST [web gateways](#)

#### All matches to this query

| Score | Mr(calc)  | Delta   | Sequence                        |
|-------|-----------|---------|---------------------------------|
| 11.1  | 1632.7851 | 0.1545  | <a href="#">AVLMDLEPGTMDSVR</a> |
| 11.1  | 1632.7851 | 0.1545  | <a href="#">AVLMDLEPGTMDSVR</a> |
| 11.1  | 1632.7851 | 0.1545  | <a href="#">GILMDLEPGTMDSVR</a> |
| 9.4   | 1632.6396 | 0.3000  | <a href="#">QTGDMMFVSEDGER</a>  |
| 8.0   | 1633.8069 | -0.8672 | <a href="#">VRCDMALPFGLPSR</a>  |
| 7.8   | 1633.7042 | -0.7646 | <a href="#">EKASDAAGEYGSYMR</a> |
| 6.3   | 1631.8202 | 1.1194  | <a href="#">EAVQTCVLSQRWR</a>   |
| 6.1   | 1633.8147 | -0.8751 | <a href="#">RILFGWANECVNR</a>   |
| 6.1   | 1633.7817 | -0.8421 | <a href="#">RILMGWANECVNR</a>   |
| 5.7   | 1632.7566 | 0.1830  | <a href="#">SDQELVEMFDKHR</a>   |

Mascot: <http://www.matrixscience.com/>



# MATRIX SCIENCE Mascot Search Results

## Peptide View **Spot no 82**

### MS/MS Fragmentation of **NHGMHFR**

Found in **gi|11466795** in **NCBI nr**, ribulose-1,5-bisphosphate carboxylase/oxygenase large subunit [Oryza sativa Japonica Group]

Match to Query 2: 897.475204 from(898.482480,1+) intensity(0.0000) index(0)

Title: Label: C11, Spot\_Id: 216639, Peak\_List\_Id: 221214, MSMS Job\_Run\_Id: 21345, Comment:

Data file C:\Documents and Settings\Administrator\Desktop\farah BHU\RAJESH\12-1-13 raj\ppw\_C11\_135997697400.txt

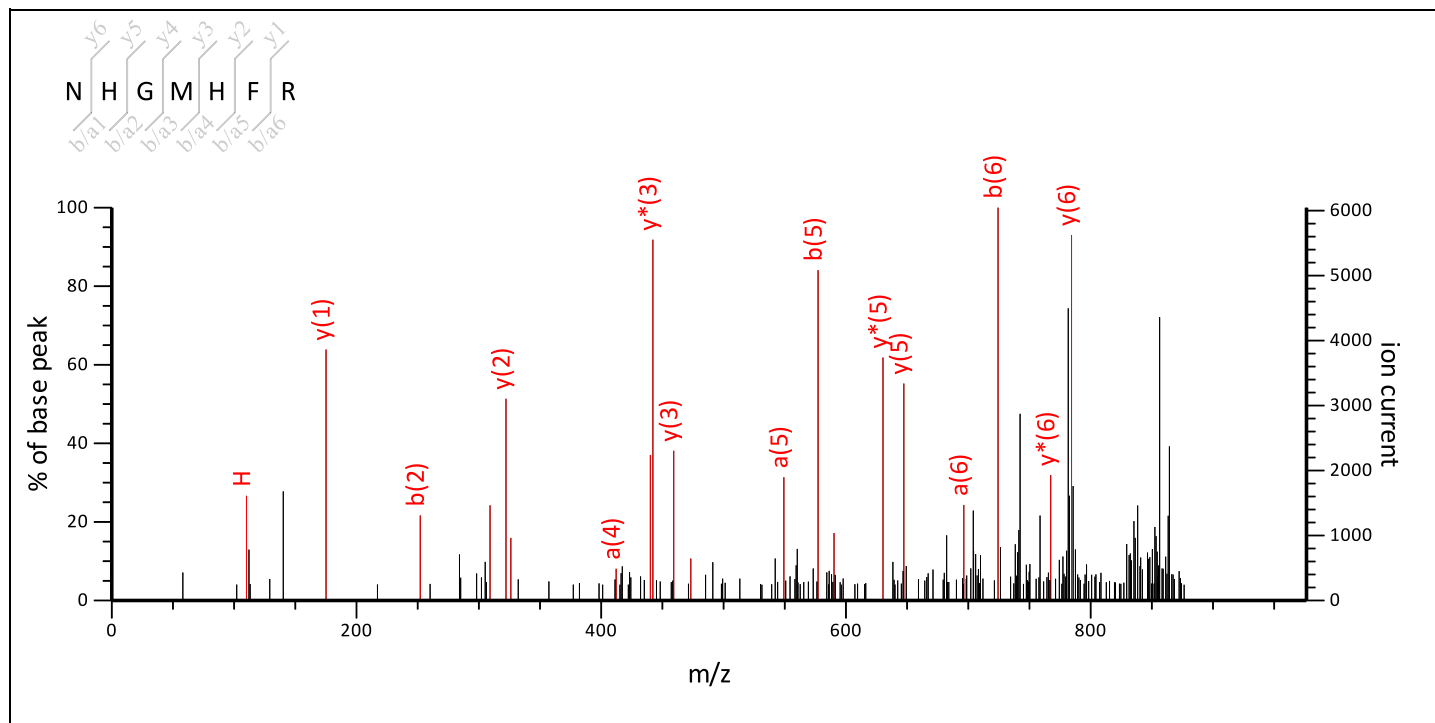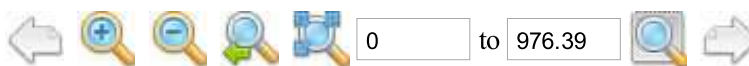

Label all possible matches  Label matches used for scoring

**Monoisotopic mass of neutral peptide Mr(calc):** 897.4028

**Fixed modifications:** Carbamidomethyl (C) (apply to specified residues or termini only)

**Ions Score:** 39 **Expect:** 0.83

**Matches:** 22/72 fragment ions using 35 most intense peaks ([help](#))

| # | Immon.   | a        | a*       | b        | b*       | d        | Seq. | v        | w        | y        | y*       | # |
|---|----------|----------|----------|----------|----------|----------|------|----------|----------|----------|----------|---|
| 1 | 87.0553  | 87.0553  | 70.0287  | 115.0502 | 98.0237  | 44.0495  | N    |          |          |          |          | 7 |
| 2 | 110.0713 | 224.1142 | 207.0877 | 252.1091 | 235.0826 |          | H    | 702.3140 |          | 784.3671 | 767.3406 | 6 |
| 3 | 30.0338  | 281.1357 | 264.1091 | 309.1306 | 292.1040 |          | G    |          |          | 647.3082 | 630.2817 | 5 |
| 4 | 104.0528 | 412.1761 | 395.1496 | 440.1711 | 423.1445 | 352.1728 | M    | 514.2521 | 513.2568 | 590.2868 | 573.2602 | 4 |
| 5 | 110.0713 | 549.2351 | 532.2085 | 577.2300 | 560.2034 |          | H    | 377.1932 |          | 459.2463 | 442.2197 | 3 |
| 6 | 120.0808 | 696.3035 | 679.2769 | 724.2984 | 707.2718 |          | F    | 230.1248 |          | 322.1874 | 305.1608 | 2 |
| 7 | 129.1135 |          |          |          |          |          | R    | 74.0237  | 73.0284  | 175.1190 | 158.0924 | 1 |

| Seq          | ya       | yb              | Seq        | ya       | yb              | Seq         | ya       | yb              |
|--------------|----------|-----------------|------------|----------|-----------------|-------------|----------|-----------------|
| <b>HG</b>    | 167.0927 | 195.0877        | <b>HGM</b> | 298.1332 | <b>326.1281</b> | <b>HGMH</b> | 435.1921 | 463.1870        |
| <b>HGMHF</b> | 582.2605 | 610.2555        | <b>GM</b>  | 161.0743 | 189.0692        | <b>GMH</b>  | 298.1332 | <b>326.1281</b> |
| <b>GMHF</b>  | 445.2016 | <b>473.1966</b> | <b>MH</b>  | 241.1118 | 269.1067        | <b>MHF</b>  | 388.1802 | 416.1751        |
| <b>HF</b>    | 257.1397 | 285.1346        |            |          |                 |             |          |                 |

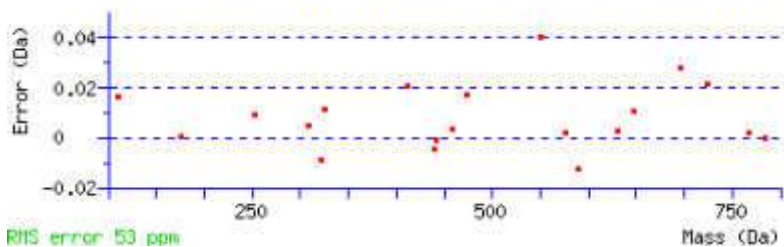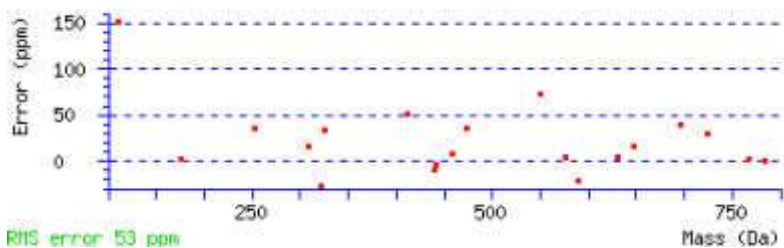

NCBI **BLAST** search of [NHGMHFR](#)

(Parameters: blastp, nr protein database, expect=20000, no filter, PAM30)

Other BLAST [web gateways](#)

#### All matches to this query

| Score | Mr(calc) | Delta   | Sequence                |
|-------|----------|---------|-------------------------|
| 38.9  | 897.4028 | 0.0724  | <a href="#">NHGMHFR</a> |
| 38.9  | 897.4028 | 0.0724  | <a href="#">NHGMHFR</a> |
| 38.9  | 897.4028 | 0.0724  | <a href="#">NHGMHFR</a> |
| 38.9  | 897.4028 | 0.0724  | <a href="#">NHGMHFR</a> |
| 38.9  | 897.4028 | 0.0724  | <a href="#">NHGMHFR</a> |
| 38.9  | 897.4028 | 0.0724  | <a href="#">NHGMHFR</a> |
| 38.9  | 897.4028 | 0.0724  | <a href="#">NHGMHFR</a> |
| 38.9  | 897.4028 | 0.0724  | <a href="#">NHGMHFR</a> |
| 38.9  | 897.3698 | 0.1054  | <a href="#">NHGMHMR</a> |
| 25.7  | 898.3868 | -0.9116 | <a href="#">DHGMHFR</a> |
| 25.7  | 898.3868 | -0.9116 | <a href="#">DHGMHFR</a> |

Mascot: <http://www.matrixscience.com/>

# MATRIX SCIENCE Mascot Search Results

## Peptide View **Spot no 82**

MS/MS Fragmentation of **ACYECLR**

Found in **gi|11466795** in **NCBI nr**, ribulose-1,5-bisphosphate carboxylase/oxygenase large subunit [Oryza sativa Japonica Group]

Match to Query 6: 970.475084 from(971.482360,1+) intensity(0.0000) index(3)

Title: Label: C11, Spot\_Id: 216639, Peak\_List\_Id: 221202, MSMS Job\_Run\_Id: 21345, Comment:

Data file C:\Documents and Settings\Administrator\Desktop\farah BHU\RAJESH\12-1-13 raj\ppw\_C11\_135997697400.txt

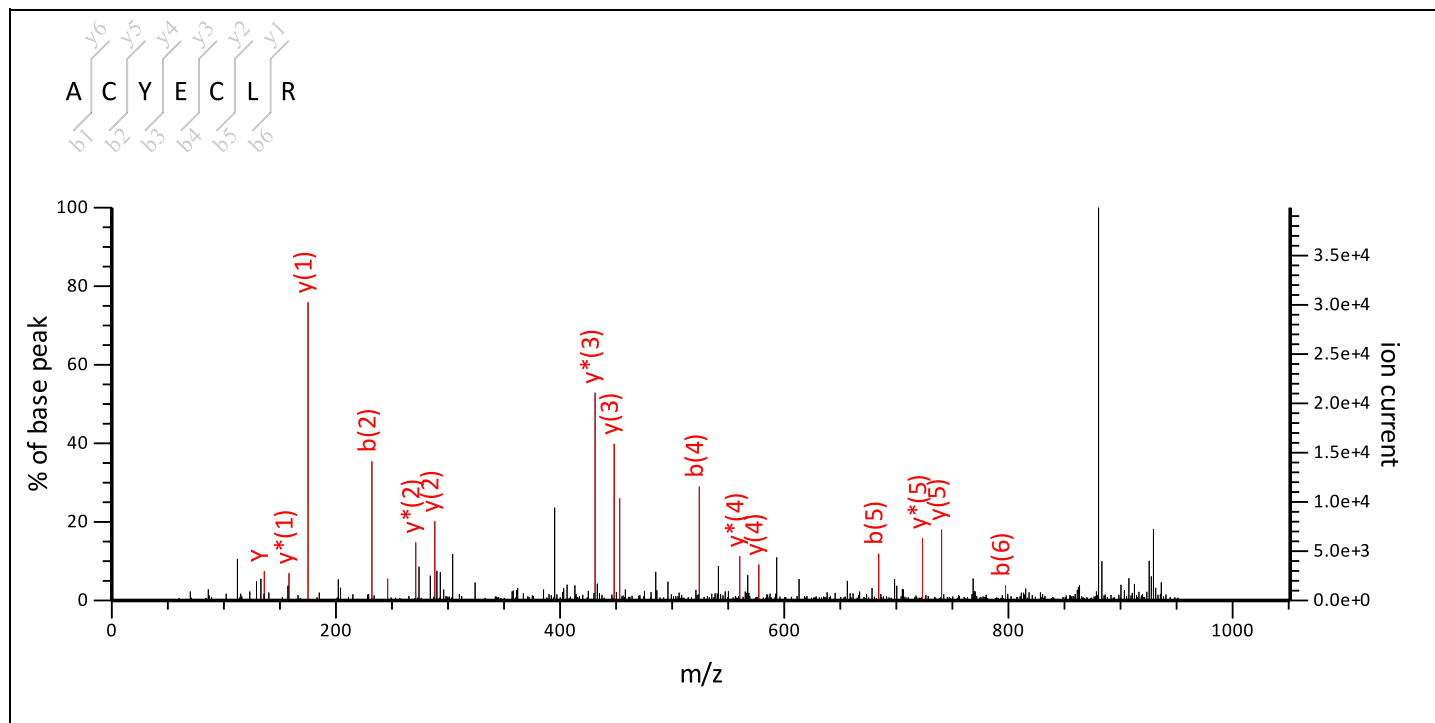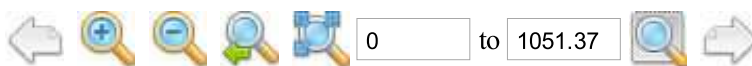

Label all possible matches  Label matches used for scoring

**Monoisotopic mass of neutral peptide Mr(calc):** 970.4001

**Fixed modifications:** Carbamidomethyl (C) (apply to specified residues or termini only)

**Ions Score:** 30 **Expect:** 6

**Matches:** 18/75 fragment ions using 27 most intense peaks ([help](#))

| # | Immon.          | a        | a <sup>0</sup> | b               | b <sup>0</sup> | d        | Seq. | v        | w        | y               | y*              | y <sup>0</sup> | # |
|---|-----------------|----------|----------------|-----------------|----------------|----------|------|----------|----------|-----------------|-----------------|----------------|---|
| 1 | 44.0495         | 44.0495  |                | 72.0444         |                | 44.0495  | A    |          |          |                 |                 |                | 7 |
| 2 | 133.0430        | 204.0801 |                | <b>232.0750</b> |                | 115.0866 | C    | 795.3454 | 794.3502 | 900.3702        | 883.3437        | 882.3597       | 6 |
| 3 | <b>136.0757</b> | 367.1435 |                | 395.1384        |                |          | Y    | 632.2821 |          | <b>740.3396</b> | <b>723.3130</b> | 722.3290       | 5 |
| 4 | 102.0550        | 496.1860 | 478.1755       | <b>524.1810</b> | 506.1704       | 438.1806 | E    | 503.2395 | 502.2442 | <b>577.2763</b> | <b>560.2497</b> | 559.2657       | 4 |
| 5 | 133.0430        | 656.2167 | 638.2061       | <b>684.2116</b> | 666.2010       | 567.2232 | C    | 343.2088 | 342.2136 | <b>448.2337</b> | <b>431.2071</b> |                | 3 |
| 6 | 86.0964         | 769.3008 | 751.2902       | <b>797.2957</b> | 779.2851       | 727.2538 | L    | 230.1248 | 229.1295 | <b>288.2030</b> | <b>271.1765</b> |                | 2 |
| 7 | 129.1135        |          |                |                 |                |          | R    | 74.0237  | 73.0284  | <b>175.1190</b> | <b>158.0924</b> |                | 1 |

| Seq   | ya       | yb       | Seq | ya       | yb       | Seq  | ya       | yb       |
|-------|----------|----------|-----|----------|----------|------|----------|----------|
| CY    | 296.1063 | 324.1013 | CYE | 425.1489 | 453.1438 | CYEC | 585.1796 | 613.1745 |
| CYECL | 698.2636 | 726.2586 | YE  | 265.1183 | 293.1132 | YEC  | 425.1489 | 453.1438 |
| YECL  | 538.2330 | 566.2279 | EC  | 262.0856 | 290.0805 | ECL  | 375.1697 | 403.1646 |
| CL    | 246.1271 | 274.1220 |     |          |          |      |          |          |

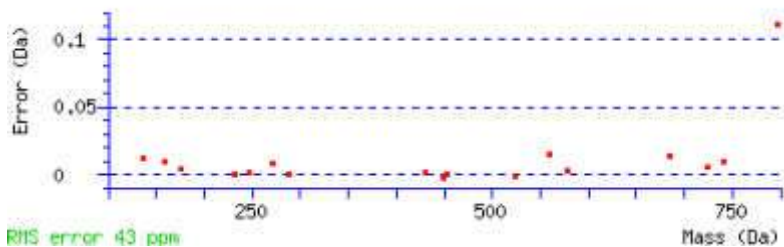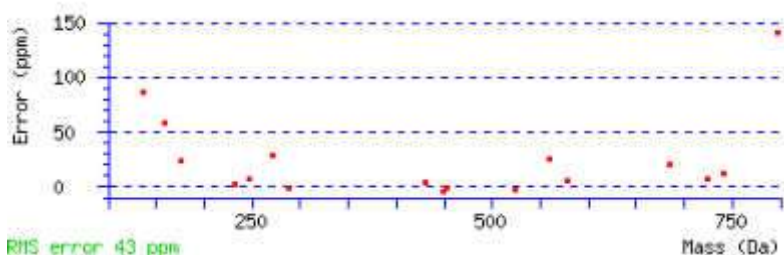

NCBI **BLAST** search of [ACYECLR](#)

(Parameters: blastp, nr protein database, expect=20000, no filter, PAM30)

Other BLAST [web gateways](#)

#### All matches to this query

| Score | Mr(calc) | Delta   | Sequence                 |
|-------|----------|---------|--------------------------|
| 30.4  | 970.4001 | 0.0750  | <a href="#">ACYECIR</a>  |
| 30.4  | 970.4001 | 0.0750  | <a href="#">ACYECLR</a>  |
| 30.4  | 970.4001 | 0.0750  | <a href="#">ACYECLR</a>  |
| 30.4  | 970.4001 | 0.0750  | <a href="#">ACYECLR</a>  |
| 30.4  | 970.4001 | 0.0750  | <a href="#">ACYECLR</a>  |
| 25.8  | 969.4412 | 1.0339  | <a href="#">MVYECLR</a>  |
| 25.4  | 970.4794 | -0.0043 | <a href="#">CVYTSTIK</a> |
| 24.5  | 970.4113 | 0.0638  | <a href="#">RMCADYR</a>  |
| 22.9  | 970.5382 | -0.0631 | <a href="#">LANPKCLR</a> |
| 20.9  | 969.5252 | 0.9499  | <a href="#">MAMLVHIR</a> |

Mascot: <http://www.matrixscience.com/>



# Mascot Search Results

## Peptide View **Spot no 82**

### MS/MS Fragmentation of **DTDILAAFR**

Found in **gi|11466795** in **NCBI**nr, ribulose-1,5-bisphosphate carboxylase/oxygenase large subunit [Oryza sativa Japonica Group]

Match to Query 9: 1020.604024 from(1021.611300,1+) intensity(0.0000) index(5)

Title: Label: C11, Spot\_Id: 216639, Peak\_List\_Id: 221223, MSMS Job\_Run\_Id: 21345, Comment:

Data file C:\Documents and Settings\Administrator\Desktop\farah BHU\RAJESH\12-1-13 raj\ppw\_C11\_135997697400.txt

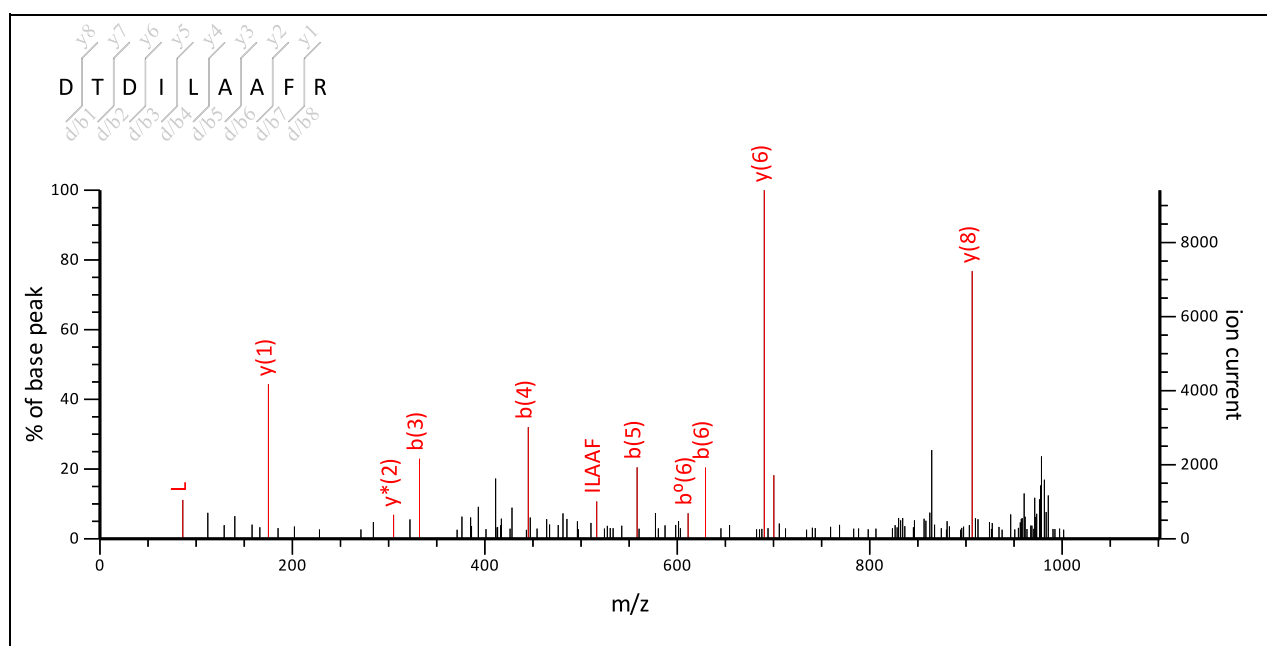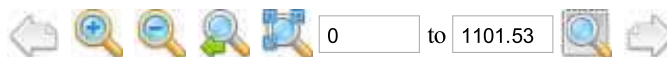

Label all possible matches  Label matches used for scoring

**Monoisotopic mass of neutral peptide Mr(calc):** 1020.5240

**Fixed modifications:** Carbamidomethyl (C) (apply to specified residues or termini only)

**Ions Score:** 33 **Expect:** 4.2

**Matches :** 14/121 fragment ions using 20 most intense peaks ([help](#))

| # | Immon.   | a        | a <sup>0</sup> | b        | b <sup>0</sup> | d        | d'       | Seq. | v        | w        | w'       | y        | y*       | y <sup>0</sup> | # |
|---|----------|----------|----------------|----------|----------------|----------|----------|------|----------|----------|----------|----------|----------|----------------|---|
| 1 | 88.0393  | 88.0393  | 70.0287        | 116.0342 | 98.0237        | 44.0495  |          | D    |          |          |          |          |          |                | 9 |
| 2 | 74.0600  | 189.0870 | 171.0764       | 217.0819 | 199.0713       | 173.0921 | 175.0713 | T    | 860.4625 | 873.4829 | 875.4621 | 906.5043 | 889.4778 | 888.4938       | 8 |
| 3 | 88.0393  | 304.1139 | 286.1034       | 332.1088 | 314.0983       | 260.1241 |          | D    | 745.4355 | 744.4403 |          | 805.4567 | 788.4301 | 787.4461       | 7 |
| 4 | 86.0964  | 417.1980 | 399.1874       | 445.1929 | 427.1823       | 389.1667 | 403.1823 | I    | 632.3515 | 645.3719 | 659.3875 | 690.4297 | 673.4032 |                | 6 |
| 5 | 86.0964  | 530.2821 | 512.2715       | 558.2770 | 540.2664       | 488.2351 |          | L    | 519.2674 | 518.2722 |          | 577.3457 | 560.3191 |                | 5 |
| 6 | 44.0495  | 601.3192 | 583.3086       | 629.3141 | 611.3035       |          |          | A    | 448.2303 |          |          | 464.2616 | 447.2350 |                | 4 |
| 7 | 44.0495  | 672.3563 | 654.3457       | 700.3512 | 682.3406       |          |          | A    | 377.1932 |          |          | 393.2245 | 376.1979 |                | 3 |
| 8 | 120.0808 | 819.4247 | 801.4141       | 847.4196 | 829.4090       |          |          | F    | 230.1248 |          |          | 322.1874 | 305.1608 |                | 2 |
| 9 | 129.1135 |          |                |          |                |          |          | R    | 74.0237  | 73.0284  |          | 175.1190 | 158.0924 |                | 1 |

| Seq   | ya       | yb       | Seq    | ya       | yb       | Seq   | ya       | yb       |
|-------|----------|----------|--------|----------|----------|-------|----------|----------|
| TD    | 189.0870 | 217.0819 | TDI    | 302.1710 | 330.1660 | TDIL  | 415.2551 | 443.2500 |
| TDILA | 486.2922 | 514.2871 | TDILAA | 557.3293 | 585.3243 | DI    | 201.1234 | 229.1183 |
| DIL   | 314.2074 | 342.2023 | DILA   | 385.2445 | 413.2395 | DILAA | 456.2817 | 484.2766 |

|                        |          |          |                       |          |                 |                     |          |          |
|------------------------|----------|----------|-----------------------|----------|-----------------|---------------------|----------|----------|
| <a href="#">DILAAF</a> | 603.3501 | 631.3450 | <a href="#">IL</a>    | 199.1805 | 227.1754        | <a href="#">ILA</a> | 270.2176 | 298.2125 |
| <a href="#">ILAA</a>   | 341.2547 | 369.2496 | <a href="#">ILAAF</a> | 488.3231 | <b>516.3180</b> | <a href="#">LA</a>  | 157.1335 | 185.1285 |
| <a href="#">LAA</a>    | 228.1707 | 256.1656 | <a href="#">LAAF</a>  | 375.2391 | 403.2340        | <a href="#">AA</a>  | 115.0866 | 143.0815 |
| <a href="#">AAF</a>    | 262.1550 | 290.1499 | <a href="#">AF</a>    | 191.1179 | 219.1128        |                     |          |          |

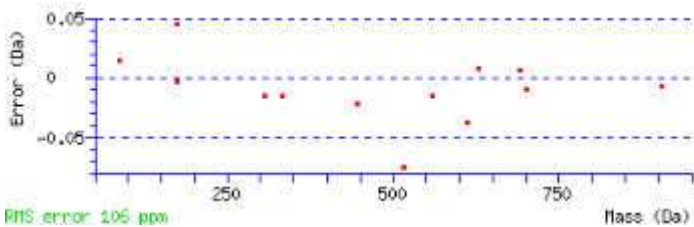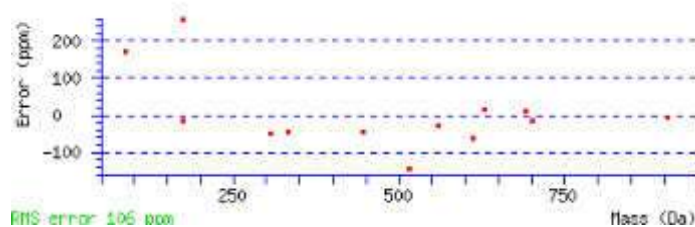

NCBI **BLAST** search of [DTDILAAFR](#)

(Parameters: blastp, nr protein database, expect=20000, no filter, PAM30)

Other BLAST [web gateways](#)

**All matches to this query**

| Score | Mr(calc)  | Delta  | Sequence                  |
|-------|-----------|--------|---------------------------|
| 33.0  | 1020.5240 | 0.0800 | <a href="#">DTDIIAAFR</a> |
| 33.0  | 1020.5240 | 0.0800 | <a href="#">DTDIIAAFR</a> |
| 33.0  | 1020.5240 | 0.0800 | <a href="#">DTDILAAFR</a> |
| 33.0  | 1020.5240 | 0.0800 | <a href="#">DTDILAAFR</a> |
| 33.0  | 1020.5240 | 0.0800 | <a href="#">DTDILAAFR</a> |
| 33.0  | 1020.5240 | 0.0800 | <a href="#">DTDILAAFR</a> |
| 33.0  | 1020.5240 | 0.0800 | <a href="#">DTDILAAFR</a> |
| 33.0  | 1020.5240 | 0.0800 | <a href="#">DTDILAAFR</a> |
| 33.0  | 1020.5240 | 0.0800 | <a href="#">DTDILAAFR</a> |
| 33.0  | 1020.5240 | 0.0800 | <a href="#">DTDILAAFR</a> |
| 33.0  | 1020.5240 | 0.0800 | <a href="#">DTDILAAFR</a> |

**Mascot:** <http://www.matrixscience.com/>

**MATRIX SCIENCE Mascot Search Results**

**Peptide View Spot no 82**

MS/MS Fragmentation of **DNGLLLHIHR**

Found in **gi|11466795** in **NCBIInr**, ribulose-1,5-bisphosphate carboxylase/oxygenase large subunit [Oryza sativa Japonica Group]

Match to Query 14: 1186.746424 from(1187.753700,1+) intensity(0.0000) index(8)

Title: Label: C11, Spot\_Id: 216639, Peak\_List\_Id: 221215, MSMS Job\_Run\_Id: 21345, Comment:

Data file C:\Documents and Settings\Administrator\Desktop\farah BHU\RAJESH\12-1-13 raj\ppw\_C11\_135997697400.txt

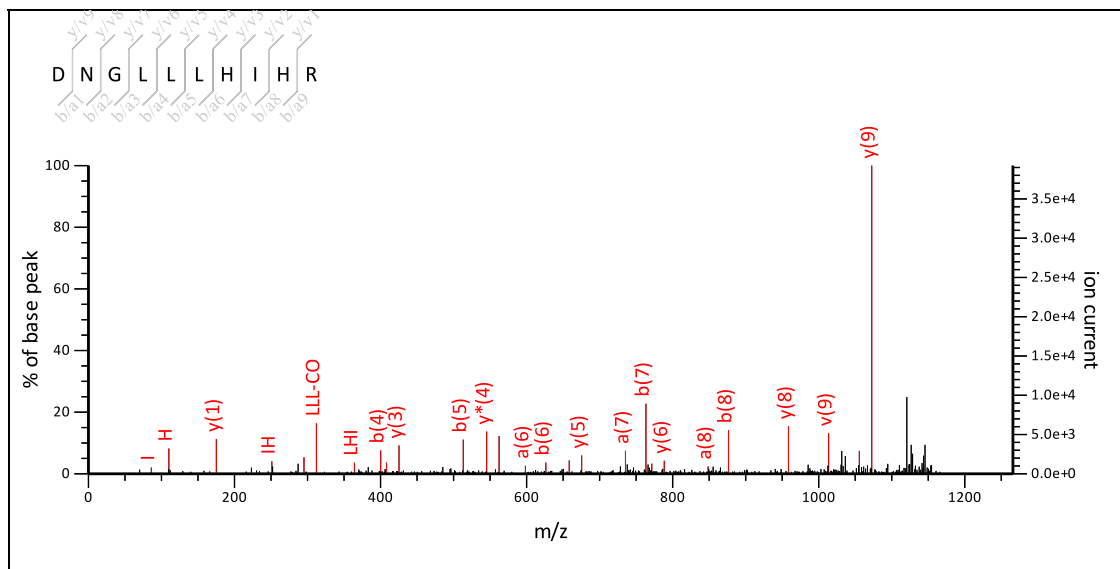

Navigation icons: ? Home Back Forward Search 0 to 1265.95

Label all possible matches  Label matches used for scoring

Monoisotopic mass of neutral peptide **Mr(calc): 1186.6571**  
 Fixed modifications: Carbamidomethyl (C) (apply to specified residues or termini only)  
 Ions Score: 75 Expect: 0.0002  
 Matches : 37/151 fragment ions using 33 most intense peaks ([help](#))

| #  | Immon.   | a        | a*       | a <sup>0</sup> | b         | b*       | b <sup>0</sup> | d        | d'       | Seq. | v         | w         | w'       | y         | y*        | #  |
|----|----------|----------|----------|----------------|-----------|----------|----------------|----------|----------|------|-----------|-----------|----------|-----------|-----------|----|
| 1  | 88.0393  | 88.0393  |          | 70.0287        | 116.0342  |          | 98.0237        | 44.0495  |          | D    |           |           |          |           |           | 10 |
| 2  | 87.0553  | 202.0822 | 185.0557 | 184.0717       | 230.0771  | 213.0506 | 212.0666       | 159.0764 |          | N    | 1013.6003 | 1012.6051 |          | 1072.6374 | 1055.6109 | 9  |
| 3  | 30.0338  | 259.1037 | 242.0771 | 241.0931       | 287.0986  | 270.0721 | 269.0880       |          |          | G    |           |           |          | 958.5945  | 941.5679  | 8  |
| 4  | 86.0964  | 372.1878 | 355.1612 | 354.1772       | 400.1827  | 383.1561 | 382.1721       | 330.1408 |          | L    | 843.4948  | 842.4995  |          | 901.5730  | 884.5465  | 7  |
| 5  | 86.0964  | 485.2718 | 468.2453 | 467.2613       | 513.2667  | 496.2402 | 495.2562       | 443.2249 |          | L    | 730.4107  | 729.4155  |          | 788.4890  | 771.4624  | 6  |
| 6  | 86.0964  | 598.3559 | 581.3293 | 580.3453       | 626.3508  | 609.3243 | 608.3402       | 556.3089 |          | L    | 617.3267  | 616.3314  |          | 675.4049  | 658.3784  | 5  |
| 7  | 110.0713 | 735.4148 | 718.3882 | 717.4042       | 763.4097  | 746.3832 | 745.3991       |          |          | H    | 480.2677  |           |          | 562.3208  | 545.2943  | 4  |
| 8  | 86.0964  | 848.4989 | 831.4723 | 830.4883       | 876.4938  | 859.4672 | 858.4832       | 820.4676 | 834.4832 | I    | 367.1837  | 380.2041  | 394.2197 | 425.2619  | 408.2354  | 3  |
| 9  | 110.0713 | 985.5578 | 968.5312 | 967.5472       | 1013.5527 | 996.5261 | 995.5421       |          |          | H    | 230.1248  |           |          | 312.1779  | 295.1513  | 2  |
| 10 | 129.1135 |          |          |                |           |          |                |          |          | R    | 74.0237   | 73.0284   |          | 175.1190  | 158.0924  | 1  |

| Seq    | ya       | yb       | Seq    | ya       | yb       | Seq    | ya       | yb       |
|--------|----------|----------|--------|----------|----------|--------|----------|----------|
| NG     | 144.0768 | 172.0717 | NGL    | 257.1608 | 285.1557 | NGLL   | 370.2449 | 398.2398 |
| NGLLL  | 483.3289 | 511.3239 | NGLLLH | 620.3879 | 648.3828 | GL     | 143.1179 | 171.1128 |
| GLL    | 256.2020 | 284.1969 | GLLL   | 369.2860 | 397.2809 | GLLLH  | 506.3449 | 534.3398 |
| GLLLHI | 619.4290 | 647.4239 | LL     | 199.1805 | 227.1754 | LLL    | 312.2646 | 340.2595 |
| LLLH   | 449.3235 | 477.3184 | LLLHI  | 562.4075 | 590.4024 | LLLHIH | 699.4664 | 727.4614 |
| LL     | 199.1805 | 227.1754 | LLH    | 336.2394 | 364.2343 | LLHI   | 449.3235 | 477.3184 |
| LLHIH  | 586.3824 | 614.3773 | LH     | 223.1553 | 251.1503 | LHI    | 336.2394 | 364.2343 |
| LHIH   | 473.2983 | 501.2932 | HI     | 223.1553 | 251.1503 | HIH    | 360.2142 | 388.2092 |



|    |          |          |  |  |  |  |  |
|----|----------|----------|--|--|--|--|--|
| IH | 223.1553 | 251.1503 |  |  |  |  |  |
|----|----------|----------|--|--|--|--|--|

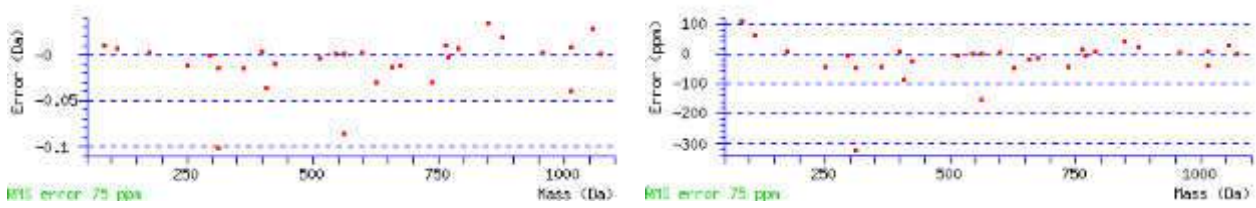

NCBI BLAST search of [DNGLLLHIHR](#)

(Parameters: blastp, nr protein database, expect=20000, no filter, PAM30)

Other BLAST [web gateways](#)

#### All matches to this query

| Score | Mr(calc)  | Delta  | Sequence                   |
|-------|-----------|--------|----------------------------|
| 75.5  | 1186.6571 | 0.0893 | <a href="#">DNGILHIHR</a>  |
| 75.5  | 1186.6571 | 0.0893 | <a href="#">DNGILLHIHR</a> |
| 75.5  | 1186.6571 | 0.0893 | <a href="#">DNGILLHIHR</a> |
| 75.5  | 1186.6571 | 0.0893 | <a href="#">DNGILLHIHR</a> |
| 75.5  | 1186.6571 | 0.0893 | <a href="#">DNGLILHIHR</a> |
| 75.5  | 1186.6571 | 0.0893 | <a href="#">DNGLILHIHR</a> |
| 75.5  | 1186.6571 | 0.0893 | <a href="#">DNGLLIHIHR</a> |
| 75.5  | 1186.6571 | 0.0893 | <a href="#">DNGLLIHIHR</a> |
| 75.5  | 1186.6571 | 0.0893 | <a href="#">DNGLLLHIHR</a> |
| 75.5  | 1186.6571 | 0.0893 | <a href="#">DNGLLLHIHR</a> |

Mascot: <http://www.matrixscience.com/>


**Mascot Search Results**
**Peptide View Spot no 82**
**MS/MS Fragmentation of FVFCAEAIYK**

 Found in **gi11466795** in **NCBINr**, ribulose-1,5-bisphosphate carboxylase/oxygenase large subunit [Oryza sativa Japonica Group]

Match to Query 16: 1246.683724 from(1247.691000,1+) intensity(0.0000) index(9)

Title: Label: C11, Spot\_Id: 216639, Peak\_List\_Id: 221211, MSMS Job\_Run\_Id: 21345, Comment:

Data file C:\Documents and Settings\Administrator\Desktop\farah BHU\RAJESH\12-1-13 raj\ppw\_C11\_135997697400.txt

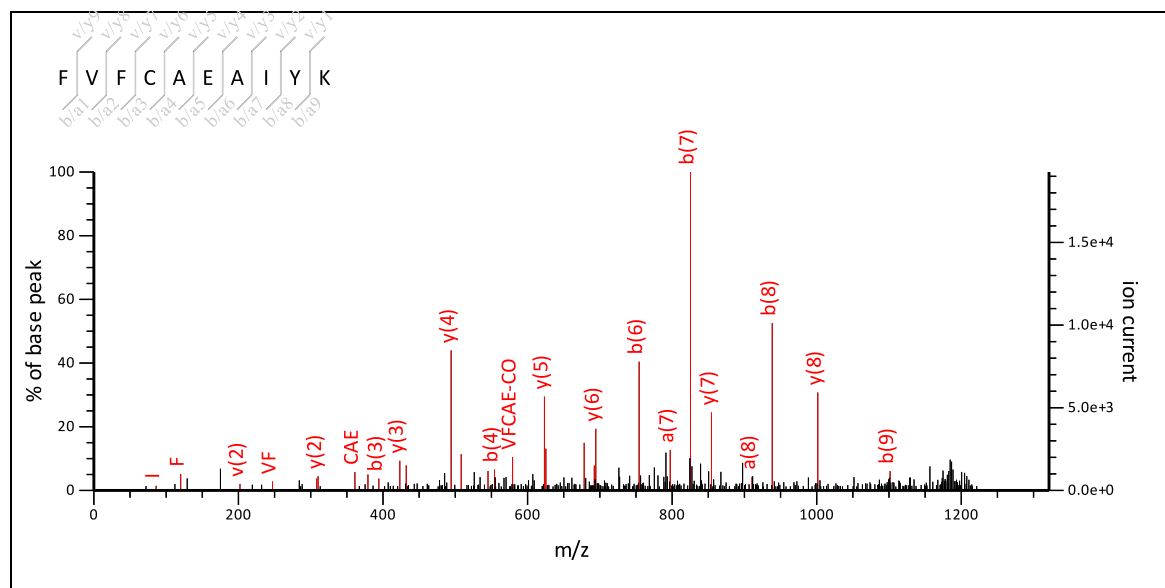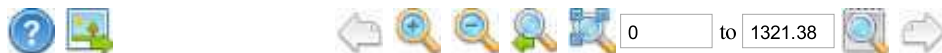
 Label all possible matches  Label matches used for scoring 
**Monoisotopic mass of neutral peptide Mr(calc):** 1246.6056

**Fixed modifications:** Carbamidomethyl (C) (apply to specified residues or termini only)

**Ions Score:** 54 **Expect:** 0.026

**Matches:** 38/129 fragment ions using 48 most intense peaks ([help](#))

| #  | Immon.   | a         | a <sup>0</sup> | b         | b <sup>0</sup> | d        | d <sup>+</sup> | Seq. | v         | w         | w <sup>+</sup> | y         | y <sup>*</sup> | y <sup>0</sup> | #  |
|----|----------|-----------|----------------|-----------|----------------|----------|----------------|------|-----------|-----------|----------------|-----------|----------------|----------------|----|
| 1  | 120.0808 | 120.0808  |                | 148.0757  |                | 44.0495  |                | F    |           |           |                |           |                |                | 10 |
| 2  | 72.0808  | 219.1492  |                | 247.1441  |                | 205.1335 |                | V    | 1056.4819 | 1069.5023 |                | 1100.5445 | 1083.5179      | 1082.5339      | 9  |
| 3  | 120.0808 | 366.2176  |                | 394.2125  |                |          |                | F    | 909.4135  |           |                | 1001.4761 | 984.4495       | 983.4655       | 8  |
| 4  | 133.0430 | 526.2483  |                | 554.2432  |                | 437.2547 |                | C    | 749.3828  | 748.3876  |                | 854.4077  | 837.3811       | 836.3971       | 7  |
| 5  | 44.0495  | 597.2854  |                | 625.2803  |                |          |                | A    | 678.3457  |           |                | 694.3770  | 677.3505       | 676.3665       | 6  |
| 6  | 102.0550 | 726.3280  | 708.3174       | 754.3229  | 736.3123       | 668.3225 |                | E    | 549.3031  | 548.3079  |                | 623.3399  | 606.3134       | 605.3293       | 5  |
| 7  | 44.0495  | 797.3651  | 779.3545       | 825.3600  | 807.3494       |          |                | A    | 478.2660  |           |                | 494.2973  | 477.2708       |                | 4  |
| 8  | 86.0964  | 910.4491  | 892.4386       | 938.4441  | 920.4335       | 882.4178 | 896.4335       | I    | 365.1819  | 378.2023  | 392.2180       | 423.2602  | 406.2336       |                | 3  |
| 9  | 136.0757 | 1073.5125 | 1055.5019      | 1101.5074 | 1083.4968      |          |                | Y    | 202.1186  |           |                | 310.1761  | 293.1496       |                | 2  |
| 10 | 101.1073 |           |                |           |                |          |                | K    | 74.0237   | 73.0284   |                | 147.1128  | 130.0863       |                | 1  |

| Seq    | ya       | yb       | Seq    | ya       | yb       | Seq    | ya       | yb       |
|--------|----------|----------|--------|----------|----------|--------|----------|----------|
| VF     | 219.1492 | 247.1441 | VFC    | 379.1798 | 407.1748 | VFCA   | 450.2170 | 478.2119 |
| VFCAE  | 579.2595 | 607.2545 | VFCAEA | 650.2967 | 678.2916 | FC     | 280.1114 | 308.1063 |
| FCA    | 351.1485 | 379.1435 | FCAE   | 480.1911 | 508.1860 | FCAEA  | 551.2282 | 579.2232 |
| FCAEAI | 664.3123 | 692.3072 | CA     | 204.0801 | 232.0750 | CAE    | 333.1227 | 361.1176 |
| CAEA   | 404.1598 | 432.1547 | CAEAI  | 517.2439 | 545.2388 | CAEAIY | 680.3072 | 708.3021 |
| AE     | 173.0921 | 201.0870 | AEA    | 244.1292 | 272.1241 | AEAI   | 357.2132 | 385.2082 |

|                       |          |          |                    |          |          |                     |          |          |
|-----------------------|----------|----------|--------------------|----------|----------|---------------------|----------|----------|
| <a href="#">AEAIY</a> | 520.2766 | 548.2715 | <a href="#">EA</a> | 173.0921 | 201.0870 | <a href="#">EAI</a> | 286.1761 | 314.1710 |
| <a href="#">EAIY</a>  | 449.2395 | 477.2344 | <a href="#">AI</a> | 157.1335 | 185.1285 | <a href="#">AIY</a> | 320.1969 | 348.1918 |
| <a href="#">IY</a>    | 249.1598 | 277.1547 |                    |          |          |                     |          |          |

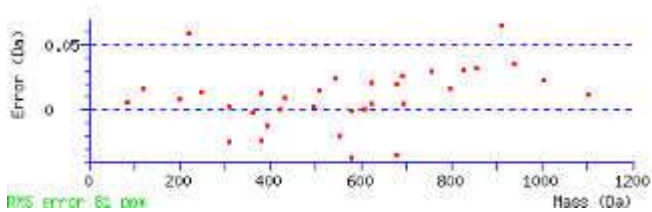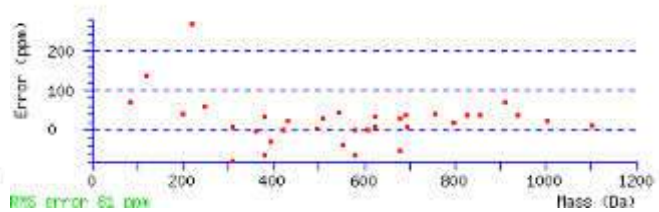

NCBI BLAST search of [FVFCAEAIYK](#)

(Parameters: blastp, nr protein database, expect=20000, no filter, PAM30)

Other BLAST [web gateways](#)

#### All matches to this query

| Score | Mr(calcd) | Delta  | Sequence                   |
|-------|-----------|--------|----------------------------|
| 53.9  | 1246.6056 | 0.0781 | <a href="#">FVFCAEAIYK</a> |
| 53.9  | 1246.6056 | 0.0781 | <a href="#">FVFCAEAIYK</a> |
| 53.9  | 1246.6056 | 0.0781 | <a href="#">FVFCAEAIYK</a> |
| 53.9  | 1246.6056 | 0.0781 | <a href="#">FVFCAEAIYK</a> |
| 53.9  | 1246.6056 | 0.0781 | <a href="#">FVFCAEAIYK</a> |
| 53.9  | 1246.6056 | 0.0781 | <a href="#">FVFCAEAIYK</a> |
| 53.9  | 1246.6056 | 0.0781 | <a href="#">FVFCAEAIYK</a> |
| 53.9  | 1246.6056 | 0.0781 | <a href="#">FVFCAEAIYK</a> |
| 53.9  | 1246.6056 | 0.0781 | <a href="#">FVFCAEALYK</a> |
| 53.9  | 1246.6056 | 0.0781 | <a href="#">FVFCAEALYK</a> |
| 53.9  | 1246.6056 | 0.0781 | <a href="#">FVFCAEALYK</a> |

Mascot: <http://www.matrixscience.com/>

**MATRIX SCIENCE Mascot Search Results**

**Peptide View Spot no 82**

MS/MS Fragmentation of **LTYYTPEYETK**

Found in **gi11466795** in **NCBI**nr, ribulose-1,5-bisphosphate carboxylase/oxygenase large subunit [Oryza sativa Japonica Group]

Match to Query 18: 1406.744524 from(1407.751800,1+) intensity(0.0000) index(11)

Title: Label: C11, Spot\_Id: 216639, Peak\_List\_Id: 221218, MSMS Job\_Run\_Id: 21345, Comment:

Data file C:\Documents and Settings\Administrator\Desktop\farah BHU\RAJESH\12-1-13 raj\ppw\_C11\_135997697400.txt

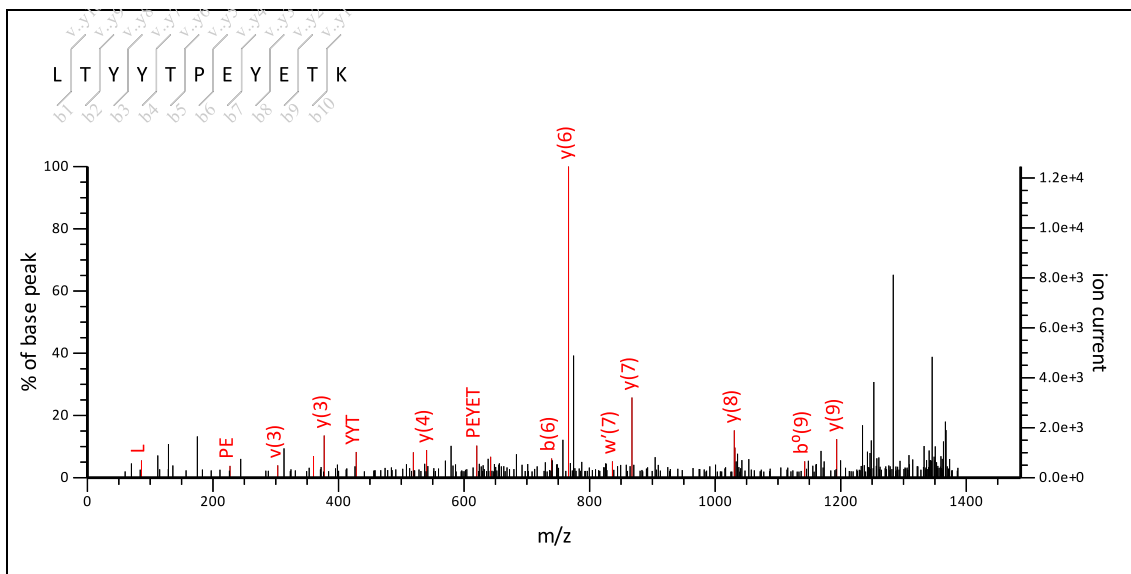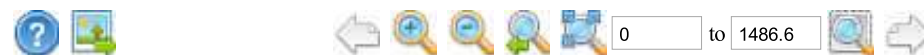

Label all possible matches  Label matches used for scoring

**Monoisotopic mass of neutral peptide Mr(calc):** 1406.6605

**Fixed modifications:** Carbamidomethyl (C) (apply to specified residues or termini only)

**Ions Score:** 20 **Expect:** 58

**Matches:** 22/161 fragment ions using 42 most intense peaks ([help](#))

| #  | Immon.   | a         | a <sup>0</sup> | b         | b <sup>0</sup> | d         | d'        | Seq. | v         | w         | w'        | y         | y*        | y <sup>0</sup> | #  |
|----|----------|-----------|----------------|-----------|----------------|-----------|-----------|------|-----------|-----------|-----------|-----------|-----------|----------------|----|
| 1  | 86.0964  | 86.0964   |                | 114.0913  |                | 44.0495   |           | L    |           |           |           |           |           |                | 11 |
| 2  | 74.0600  | 187.1441  | 169.1335       | 215.1390  | 197.1285       | 171.1492  | 173.1285  | T    | 1248.5419 | 1261.5623 | 1263.5416 | 1294.5838 | 1277.5572 | 1276.5732      | 10 |
| 3  | 136.0757 | 350.2074  | 332.1969       | 378.2023  | 360.1918       |           |           | Y    | 1085.4786 |           |           | 1193.5361 | 1176.5096 | 1175.5255      | 9  |
| 4  | 136.0757 | 513.2708  | 495.2602       | 541.2657  | 523.2551       |           |           | Y    | 922.4153  |           |           | 1030.4728 | 1013.4462 | 1012.4622      | 8  |
| 5  | 74.0600  | 614.3184  | 596.3079       | 642.3134  | 624.3028       | 598.3235  | 600.3028  | T    | 821.3676  | 834.3880  | 836.3672  | 867.4094  | 850.3829  | 849.3989       | 7  |
| 6  | 70.0651  | 711.3712  | 693.3606       | 739.3661  | 721.3556       | 685.3556  |           | P    | 724.3148  | 723.3196  |           | 766.3618  | 749.3352  | 748.3512       | 6  |
| 7  | 102.0550 | 840.4138  | 822.4032       | 868.4087  | 850.3981       | 782.4083  |           | E    | 595.2722  | 594.2770  |           | 669.3090  | 652.2824  | 651.2984       | 5  |
| 8  | 136.0757 | 1003.4771 | 985.4666       | 1031.4720 | 1013.4615      |           |           | Y    | 432.2089  |           |           | 540.2664  | 523.2399  | 522.2558       | 4  |
| 9  | 102.0550 | 1132.5197 | 1114.5092      | 1160.5146 | 1142.5041      | 1074.5142 |           | E    | 303.1663  | 302.1710  |           | 377.2031  | 360.1765  | 359.1925       | 3  |
| 10 | 74.0600  | 1233.5674 | 1215.5568      | 1261.5623 | 1243.5517      | 1217.5725 | 1219.5517 | T    | 202.1186  | 215.1390  | 217.1183  | 248.1605  | 231.1339  | 230.1499       | 2  |
| 11 | 101.1073 |           |                |           |                |           |           | K    | 74.0237   | 73.0284   |           | 147.1128  | 130.0863  |                | 1  |

| Seq   | ya       | yb       | Seq    | ya       | yb       | Seq   | ya       | yb       |
|-------|----------|----------|--------|----------|----------|-------|----------|----------|
| TY    | 237.1234 | 265.1183 | TYT    | 400.1867 | 428.1816 | TYYT  | 501.2344 | 529.2293 |
| TYTTP | 598.2871 | 626.2821 | YY     | 299.1390 | 327.1339 | YYT   | 400.1867 | 428.1816 |
| YYTP  | 497.2395 | 525.2344 | YYTPE  | 626.2821 | 654.2770 | YT    | 237.1234 | 265.1183 |
| YTP   | 334.1761 | 362.1710 | YTPE   | 463.2187 | 491.2136 | YTPEY | 626.2821 | 654.2770 |
| TP    | 171.1128 | 199.1077 | TPE    | 300.1554 | 328.1503 | TPEY  | 463.2187 | 491.2136 |
| TPEYE | 592.2613 | 620.2562 | TPEYET | 693.3090 | 721.3039 | PE    | 199.1077 | 227.1026 |

|                     |          |          |                      |          |                          |                       |          |                          |
|---------------------|----------|----------|----------------------|----------|--------------------------|-----------------------|----------|--------------------------|
| <a href="#">PEY</a> | 362.1710 | 390.1660 | <a href="#">PEYE</a> | 491.2136 | <a href="#">519.2086</a> | <a href="#">PEYET</a> | 592.2613 | <a href="#">620.2562</a> |
| <a href="#">EY</a>  | 265.1183 | 293.1132 | <a href="#">EYE</a>  | 394.1609 | 422.1558                 | <a href="#">EYET</a>  | 495.2086 | 523.2035                 |
| <a href="#">YE</a>  | 265.1183 | 293.1132 | <a href="#">YET</a>  | 366.1660 | 394.1609                 | <a href="#">ET</a>    | 203.1026 | 231.0975                 |

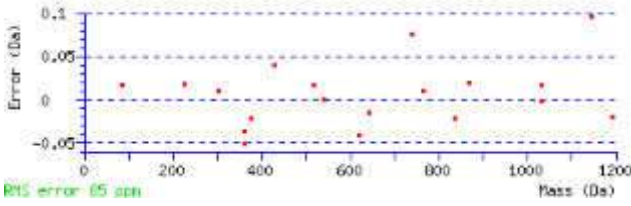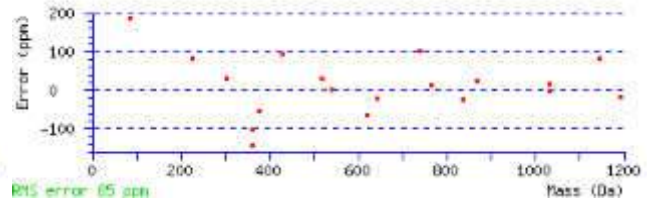

NCBI BLAST search of [LTYYTPEYETK](#)

(Parameters: blastp, nr protein database, expect=20000, no filter, PAM30)

Other BLAST [web gateways](#)

All matches to this query

| Score | Mr(calc)  | Delta  | Sequence                    |
|-------|-----------|--------|-----------------------------|
| 22.3  | 1406.1685 | 0.5760 | <a href="#">LTYYTPEYZTK</a> |
| 20.1  | 1406.6605 | 0.0840 | <a href="#">ITYYTPEYETK</a> |
| 20.1  | 1406.6605 | 0.0840 | <a href="#">ITYYTPEYETK</a> |
| 20.1  | 1406.6605 | 0.0840 | <a href="#">LTYYTPEYETK</a> |
| 20.1  | 1406.6605 | 0.0840 | <a href="#">LTYYTPEYETK</a> |
| 20.1  | 1406.6605 | 0.0840 | <a href="#">LTYYTPEYETK</a> |
| 20.1  | 1406.6605 | 0.0840 | <a href="#">LTYYTPEYETK</a> |
| 20.1  | 1406.6605 | 0.0840 | <a href="#">LTYYTPEYETK</a> |
| 20.1  | 1406.6605 | 0.0840 | <a href="#">LTYYTPEYETK</a> |
| 20.1  | 1406.6605 | 0.0840 | <a href="#">LTYYTPEYETK</a> |
| 20.1  | 1406.6605 | 0.0840 | <a href="#">LTYYTPEYETK</a> |

Mascot: <http://www.matrixscience.com/>

**MATRIX SCIENCE Mascot Search Results**

**Peptide View Spot no 82**

MS/MS Fragmentation of **LEDLRIPPTYSK**

Found in **gi|11466795** in **NCBI nr**, ribulose-1,5-bisphosphate carboxylase/oxygenase large subunit [Oryza sativa Japonica Group]

Match to Query 20: 1430.873124 from(1431.880400,1+) intensity(0.0000) index(12)

Title: Label: C11, Spot\_Id: 216639, Peak\_List\_Id: 221216, MSMS Job\_Run\_Id: 21345, Comment:

Data file C:\Documents and Settings\Administrator\Desktop\farah BHU\RAJESH\12-1-13 rajppw\_C11\_135997697400.txt

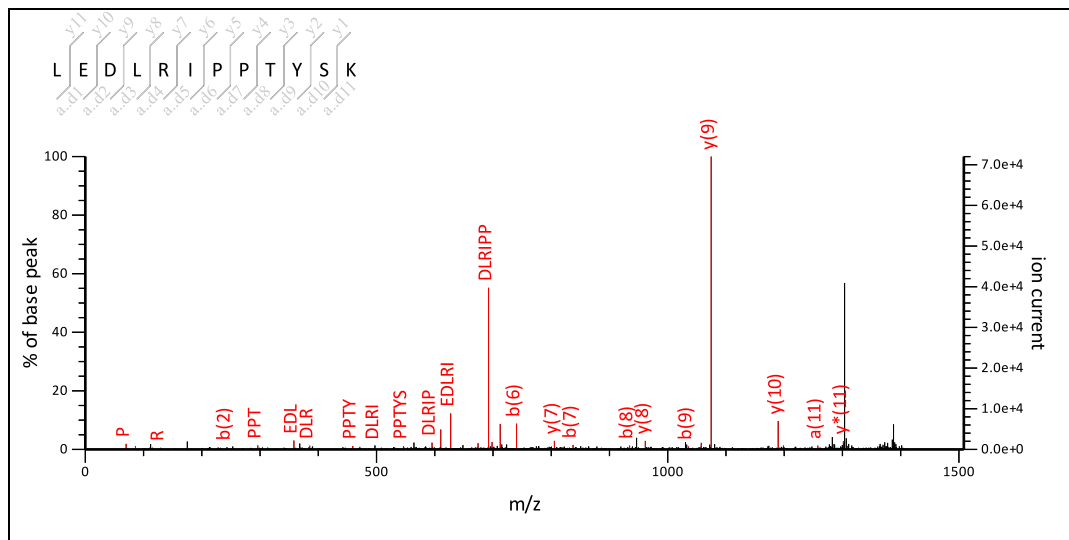

Navigation icons: Home, Back, Forward, Search, Print, Refresh. Range: 0 to 1508.44

Label all possible matches  Label matches used for scoring

Monoisotopic mass of neutral peptide Mr(calc): 1430.7769

Fixed modifications: Carbamidomethyl (C) (apply to specified residues or termini only)

Ions Score: 47 Expect: 0.12

Matches : 42/202 fragment ions using 70 most intense peaks (help)

| #  | Immon.   | a         | a*        | a <sup>0</sup> | b         | b*        | b <sup>0</sup> | d         | d'       | Seq. | v         | w         | w'       | y         | y*        |
|----|----------|-----------|-----------|----------------|-----------|-----------|----------------|-----------|----------|------|-----------|-----------|----------|-----------|-----------|
| 1  | 86.0964  | 86.0964   |           |                | 114.0913  |           |                | 44.0495   |          | L    |           |           |          |           |           |
| 2  | 102.0550 | 215.1390  |           | 197.1285       | 243.1339  |           | 225.1234       | 157.1335  |          | E    | 1244.6634 | 1243.6681 |          | 1318.7001 | 1301.6736 |
| 3  | 88.0393  | 330.1660  |           | 312.1554       | 358.1609  |           | 340.1503       | 286.1761  |          | D    | 1129.6364 | 1128.6412 |          | 1189.6576 | 1172.6310 |
| 4  | 86.0964  | 443.2500  |           | 425.2395       | 471.2449  |           | 453.2344       | 401.2031  |          | L    | 1016.5524 | 1015.5571 |          | 1074.6306 | 1057.6041 |
| 5  | 129.1135 | 599.3511  | 582.3246  | 581.3406       | 627.3461  | 610.3195  | 609.3355       | 514.2871  |          | R    | 860.4512  | 859.4560  |          | 961.5465  | 944.5200  |
| 6  | 86.0964  | 712.4352  | 695.4087  | 694.4246       | 740.4301  | 723.4036  | 722.4196       | 684.4039  | 698.4196 | I    | 747.3672  | 760.3876  | 774.4032 | 805.4454  | 788.4189  |
| 7  | 70.0651  | 809.4880  | 792.4614  | 791.4774       | 837.4829  | 820.4563  | 819.4723       | 783.4723  |          | P    | 650.3144  | 649.3192  |          | 692.3614  | 675.3348  |
| 8  | 70.0651  | 906.5407  | 889.5142  | 888.5302       | 934.5356  | 917.5091  | 916.5251       | 880.5251  |          | P    | 553.2617  | 552.2664  |          | 595.3086  | 578.2821  |
| 9  | 74.0600  | 1007.5884 | 990.5619  | 989.5778       | 1035.5833 | 1018.5568 | 1017.5728      | 991.5935  | 993.5728 | T    | 452.2140  | 465.2344  | 467.2136 | 498.2558  | 481.2293  |
| 10 | 136.0757 | 1170.6517 | 1153.6252 | 1152.6412      | 1198.6467 | 1181.6201 | 1180.6361      |           |          | Y    | 289.1506  |           |          | 397.2082  | 380.1816  |
| 11 | 60.0444  | 1257.6838 | 1240.6572 | 1239.6732      | 1285.6787 | 1268.6521 | 1267.6681      | 1241.6889 |          | S    | 202.1186  | 201.1234  |          | 234.1448  | 217.1183  |
| 12 | 101.1073 |           |           |                |           |           |                |           |          | K    | 74.0237   | 73.0284   |          | 147.1128  | 130.0863  |

| Seq    | ya       | yb       | Seq    | ya       | yb       | Seq     | ya       | yb       |
|--------|----------|----------|--------|----------|----------|---------|----------|----------|
| ED     | 217.0819 | 245.0768 | EDL    | 330.1660 | 358.1609 | EDLR    | 486.2671 | 514.2620 |
| EDLRI  | 599.3511 | 627.3461 | EDLRIP | 696.4039 | 724.3988 | DL      | 201.1234 | 229.1183 |
| DLR    | 357.2245 | 385.2194 | DLRI   | 470.3085 | 498.3035 | DLRIP   | 567.3613 | 595.3562 |
| DLRIPP | 664.4141 | 692.4090 | LR     | 242.1975 | 270.1925 | LRI     | 355.2816 | 383.2765 |
| LRIP   | 452.3344 | 480.3293 | LRIPP  | 549.3871 | 577.3820 | LRIPPT  | 650.4348 | 678.4297 |
| RI     | 242.1975 | 270.1925 | RIP    | 339.2503 | 367.2452 | RIPP    | 436.3031 | 464.2980 |
| RIPPT  | 537.3507 | 565.3457 | IP     | 183.1492 | 211.1441 | IPP     | 280.2020 | 308.1969 |
| IPPT   | 381.2496 | 409.2445 | IPPTY  | 544.3130 | 572.3079 | IPPTYYS | 631.3450 | 659.3399 |
| PP     | 167.1179 | 195.1128 | PPT    | 268.1656 | 296.1605 | PPTY    | 431.2289 | 459.2238 |

|              |          |                 |           |          |          |            |          |          |
|--------------|----------|-----------------|-----------|----------|----------|------------|----------|----------|
| <b>PPTYS</b> | 518.2609 | <b>546.2558</b> | <b>PT</b> | 171.1128 | 199.1077 | <b>PTY</b> | 334.1761 | 362.1710 |
| <b>PTYS</b>  | 421.2082 | 449.2031        | <b>TY</b> | 237.1234 | 265.1183 | <b>TYS</b> | 324.1554 | 352.1503 |
| <b>YS</b>    | 223.1077 | 251.1026        |           |          |          |            |          |          |

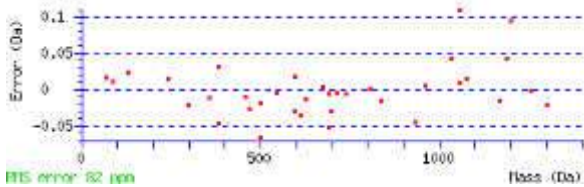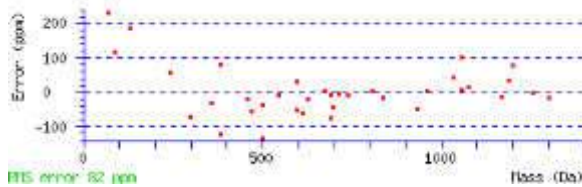

NCBI BLAST search of [LEDLRIPPTYSK](#)

(Parameters: blastp, nr protein database, expect=20000, no filter, PAM30)

Other BLAST [web gateways](#)

All matches to this query

| Score | Mr(calc)  | Delta  | Sequence                     |
|-------|-----------|--------|------------------------------|
| 46.7  | 1430.7769 | 0.0962 | <a href="#">LEDLRIPPTYSK</a> |
| 46.7  | 1430.7769 | 0.0962 | <a href="#">LEDLRIPPTYSK</a> |
| 46.7  | 1430.7769 | 0.0962 | <a href="#">LEDLRIPPTYSK</a> |
| 46.7  | 1430.7769 | 0.0962 | <a href="#">LEDLRIPPTYSK</a> |
| 46.7  | 1430.7769 | 0.0962 | <a href="#">LEDLRIPPTYSK</a> |
| 37.7  | 1430.7769 | 0.0962 | <a href="#">LEDLRIPPTYSK</a> |
| 30.5  | 1430.7374 | 0.1358 | <a href="#">EPMRLLOEMIR</a>  |
| 30.3  | 1430.7769 | 0.0962 | <a href="#">LEDLRIPPSYTK</a> |
| 30.3  | 1430.7769 | 0.0962 | <a href="#">LEDLRIPPSYTK</a> |
| 30.3  | 1430.7769 | 0.0962 | <a href="#">LEDLRIPPSYTK</a> |

Mascot: <http://www.matrixscience.com/>



**MATRIX SCIENCE Mascot Search Results**

**Peptide View Spot no 82**

MS/MS Fragmentation of **TFQPPHGIQVER**

Found in **gi|11466795** in **NCBI**nr, ribulose-1,5-bisphosphate carboxylase/oxygenase large subunit [Oryza sativa Japonica Group]

Match to Query 22: 1464.842824 from(1465.850100,1+) intensity(0.0000) index(13)

Title: Label: C11, Spot\_Id: 216639, Peak\_List\_Id: 221197, MSMS Job\_Run\_Id: 21345, Comment:

Data file C:\Documents and Settings\Administrator\Desktop\farah BHU\RAJESH\12-1-13 raj\ppw\_C11\_135997697400.txt

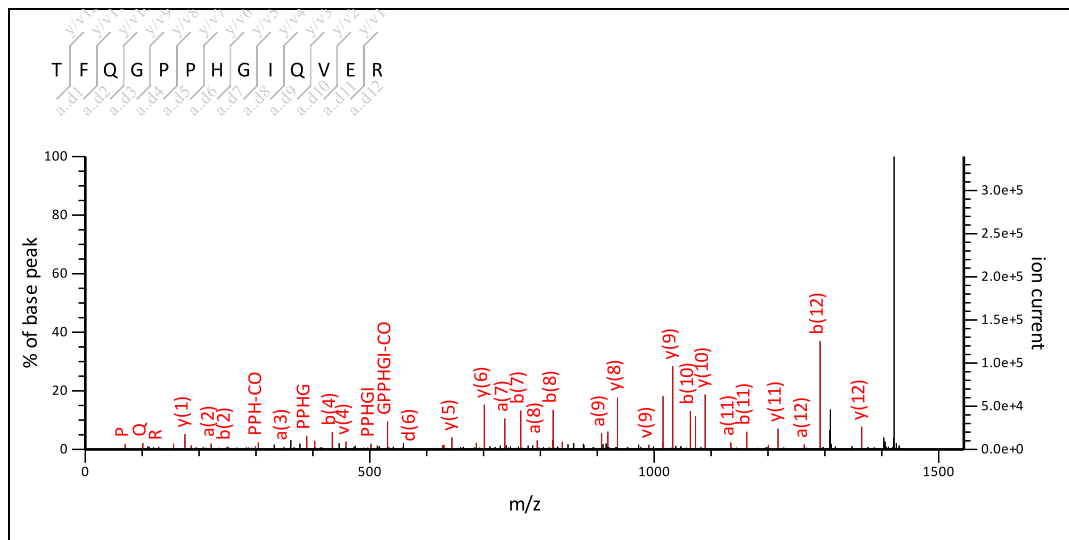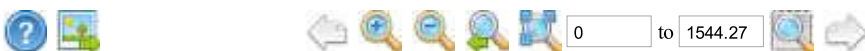

Label all possible matches  Label matches used for scoring

Monoisotopic mass of neutral peptide Mr(calc): 1464.7474

Fixed modifications: Carbamidomethyl (C) (apply to specified residues or termini only)

Ions Score: 104 Expect: 2.8e-07

Matches : 72/229 fragment ions using 70 most intense peaks [\(help\)](#)

| #  | Immon.          | a                | a*              | a <sup>0</sup> | b                | b*              | b <sup>0</sup>  | d               | d'       | Seq. | v               | w         | w'       | y                | y*               |
|----|-----------------|------------------|-----------------|----------------|------------------|-----------------|-----------------|-----------------|----------|------|-----------------|-----------|----------|------------------|------------------|
| 1  | 74.0600         | 74.0600          |                 | 56.0495        | 102.0550         |                 | 84.0444         | 44.0495         |          | T    |                 |           |          |                  |                  |
| 2  | 120.0808        | <b>221.1285</b>  |                 | 203.1179       | <b>249.1234</b>  |                 | 231.1128        |                 |          | F    | 1272.6444       |           |          | <b>1364.7070</b> | 1347.6804        |
| 3  | <b>101.0709</b> | <b>349.1870</b>  | <b>332.1605</b> | 331.1765       | 377.1819         | 360.1554        | 359.1714        | 292.1656        |          | Q    | 1144.5858       | 1143.5905 |          | <b>1217.6385</b> | <b>1200.6120</b> |
| 4  | 30.0338         | 406.2085         | <b>389.1819</b> | 388.1979       | <b>434.2034</b>  | 417.1769        | 416.1928        |                 |          | G    |                 |           |          | <b>1089.5800</b> | <b>1072.5534</b> |
| 5  | <b>70.0651</b>  | 503.2613         | 486.2347        | 485.2507       | <b>531.2562</b>  | 514.2296        | <b>513.2456</b> | 477.2456        |          | P    | <b>990.5116</b> | 989.5163  |          | <b>1032.5585</b> | <b>1015.5320</b> |
| 6  | <b>70.0651</b>  | 600.3140         | 583.2875        | 582.3035       | <b>628.3089</b>  | 611.2824        | 610.2984        | <b>574.2984</b> |          | P    | 893.4588        | 892.4635  |          | <b>935.5057</b>  | <b>918.4792</b>  |
| 7  | <b>110.0713</b> | <b>737.3729</b>  | 720.3464        | 719.3624       | <b>765.3679</b>  | 748.3413        | 747.3573        |                 |          | H    | 756.3999        |           |          | <b>838.4530</b>  | <b>821.4264</b>  |
| 8  | 30.0338         | <b>794.3944</b>  | 777.3679        | 776.3838       | <b>822.3893</b>  | 805.3628        | 804.3787        |                 |          | G    |                 |           |          | <b>701.3941</b>  | 684.3675         |
| 9  | 86.0964         | <b>907.4785</b>  | 890.4519        | 889.4679       | <b>935.4734</b>  | <b>918.4468</b> | 917.4628        | 879.4472        | 893.4628 | I    | 586.2944        | 599.3148  | 613.3304 | <b>644.3726</b>  | 627.3461         |
| 10 | <b>101.0709</b> | 1035.5370        | 1018.5105       | 1017.5265      | <b>1063.5320</b> | 1046.5054       | 1045.5214       | 978.5156        |          | Q    | <b>458.2358</b> | 457.2405  |          | <b>531.2885</b>  | 514.2620         |
| 11 | 72.0808         | <b>1134.6055</b> | 1117.5789       | 1116.5949      | <b>1162.6004</b> | 1145.5738       | 1144.5898       | 1120.5898       |          | V    | 359.1674        | 372.1878  |          | <b>403.2300</b>  | 386.2034         |
| 12 | 102.0550        | <b>1263.6480</b> | 1246.6215       | 1245.6375      | <b>1291.6430</b> | 1274.6164       | 1273.6324       | 1205.6426       |          | E    | 230.1248        | 229.1295  |          | <b>304.1615</b>  | 287.1350         |
| 13 | <b>129.1135</b> |                  |                 |                |                  |                 |                 |                 |          | R    | 74.0237         | 73.0284   |          | <b>175.1190</b>  | 158.0924         |

| Seq   | ya              | yb              | Seq    | ya              | yb              | Seq     | ya              | yb              |
|-------|-----------------|-----------------|--------|-----------------|-----------------|---------|-----------------|-----------------|
| FQ    | 248.1394        | 276.1343        | FQG    | 305.1608        | 333.1557        | FQGP    | 402.2136        | 430.2085        |
| FQPPP | 499.2663        | 527.2613        | FQPPH  | 636.3253        | 664.3202        | FQPPHG  | 693.3467        | 721.3416        |
| QG    | 158.0924        | <b>186.0873</b> | QGP    | 255.1452        | <b>283.1401</b> | QGPP    | 352.1979        | 380.1928        |
| QGPPH | 489.2568        | 517.2518        | QGPPHG | 546.2783        | <b>574.2732</b> | QGPPHGI | <b>659.3624</b> | <b>687.3573</b> |
| GP    | 127.0866        | <b>155.0815</b> | GPP    | 224.1394        | 252.1343        | GPPH    | <b>361.1983</b> | <b>389.1932</b> |
| GPPHG | 418.2197        | 446.2146        | GPPHGI | <b>531.3038</b> | <b>559.2987</b> | GPPHGIQ | <b>659.3624</b> | <b>687.3573</b> |
| PP    | 167.1179        | <b>195.1128</b> | PPH    | <b>304.1768</b> | <b>332.1717</b> | PPHG    | <b>361.1983</b> | <b>389.1932</b> |
| PPHGI | <b>474.2823</b> | <b>502.2772</b> | PPHGIQ | 602.3409        | <b>630.3358</b> | PH      | 207.1240        | 235.1190        |

|               |          |          |              |          |                 |               |          |          |
|---------------|----------|----------|--------------|----------|-----------------|---------------|----------|----------|
| <b>PHG</b>    | 264.1455 | 292.1404 | <b>PHGI</b>  | 377.2296 | 405.2245        | <b>PHGIQ</b>  | 505.2881 | 533.2831 |
| <b>PHGIQV</b> | 604.3566 | 632.3515 | <b>HG</b>    | 167.0927 | <b>195.0877</b> | <b>HGI</b>    | 280.1768 | 308.1717 |
| <b>HGIQ</b>   | 408.2354 | 436.2303 | <b>HGIQV</b> | 507.3038 | 535.2987        | <b>HGIQVE</b> | 636.3464 | 664.3413 |
| <b>GI</b>     | 143.1179 | 171.1128 | <b>GIQ</b>   | 271.1765 | <b>299.1714</b> | <b>GIQV</b>   | 370.2449 | 398.2398 |
| <b>GIQVE</b>  | 499.2875 | 527.2824 | <b>IQ</b>    | 214.1550 | 242.1499        | <b>IQV</b>    | 313.2234 | 341.2183 |
| <b>IQVE</b>   | 442.2660 | 470.2609 | <b>QV</b>    | 200.1394 | 228.1343        | <b>QVE</b>    | 329.1819 | 357.1769 |
| <b>VE</b>     | 201.1234 | 229.1183 |              |          |                 |               |          |          |

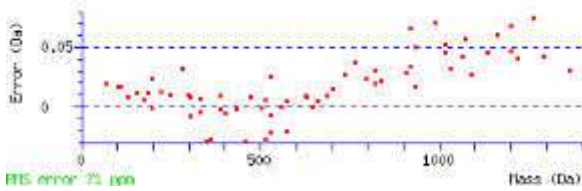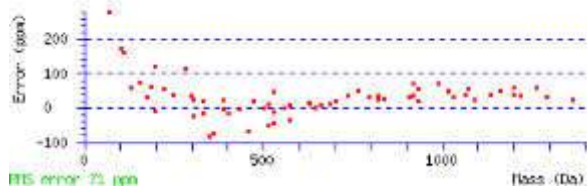

NCBI **BLAST** search of [TFOGPPHGIQVER](#)

(Parameters: blastp, nr protein database, expect=20000, no filter, PAM30)

Other BLAST [web gateways](#)

#### All matches to this query

| Score | Mr(calc)  | Delta  | Sequence                      |
|-------|-----------|--------|-------------------------------|
| 104.1 | 1464.7838 | 0.0591 | <a href="#">TFKGPPHGIQVER</a> |
| 104.1 | 1464.7838 | 0.0591 | <a href="#">TFKGPPHGIQVER</a> |
| 104.1 | 1464.7838 | 0.0591 | <a href="#">TFOGPPHGIKVER</a> |
| 104.1 | 1464.7838 | 0.0591 | <a href="#">TFOGPPHGIKVER</a> |
| 104.1 | 1464.7474 | 0.0954 | <a href="#">TFOGPPHGIQVER</a> |
| 104.1 | 1464.7474 | 0.0954 | <a href="#">TFOGPPHGIQVER</a> |
| 104.1 | 1464.7474 | 0.0954 | <a href="#">TFOGPPHGIQVER</a> |
| 104.1 | 1464.7474 | 0.0954 | <a href="#">TFOGPPHGIQVER</a> |
| 104.1 | 1464.7474 | 0.0954 | <a href="#">TFOGPPHGIQVER</a> |
| 104.1 | 1464.7474 | 0.0954 | <a href="#">TFOGPPHGIQVER</a> |

Mascot: <http://www.matrixscience.com/>

**MATRIX SCIENCE Mascot Search Results**

**Peptide View Spot no 82**

MS/MS Fragmentation of **YGRPLLGCTIKPK**

Found in **gi|11466795** in **NCBI**nr, ribulose-1,5-bisphosphate carboxylase/oxygenase large subunit [Oryza sativa Japonica Group]

Match to Query 24: 1501.935024 from(1502.942300,1+) intensity(0.0000) index(14)

Title: Label: C11, Spot\_Id: 216639, Peak\_List\_Id: 221198, MSMS Job\_Run\_Id: 21345, Comment:

Data file C:\Documents and Settings\Administrator\Desktop\farah BHU\RAJESH\12-1-13 raj\ppw\_C11\_135997697400.txt

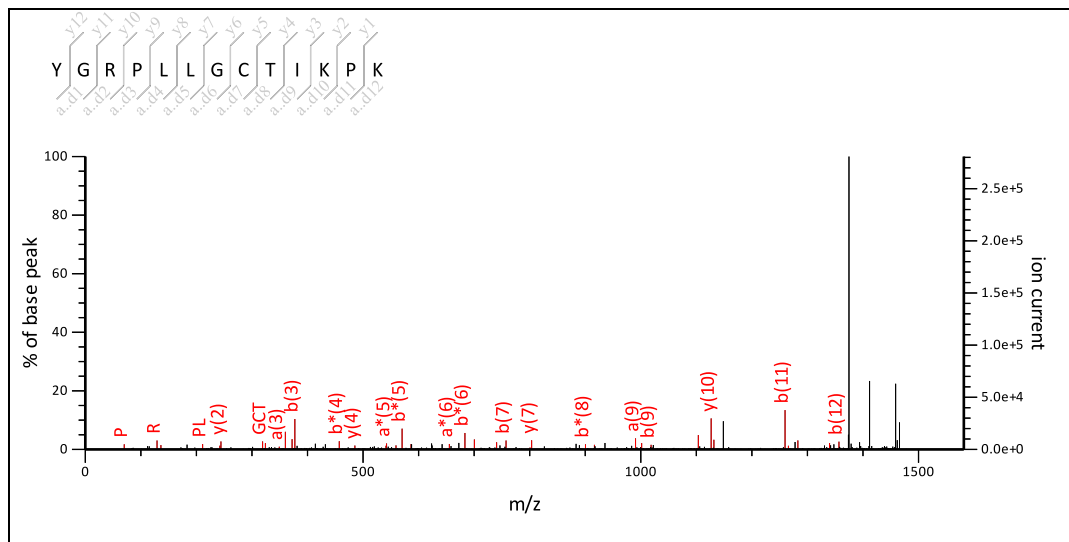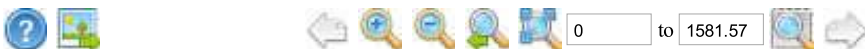

Label all possible matches  Label matches used for scoring

Monoisotopic mass of neutral peptide Mr(calc): 1501.8439

Fixed modifications: Carbamidomethyl (C) (apply to specified residues or termini only)

Ions Score: 57 Expect: 0.014

Matches : 43/211 fragment ions using 60 most intense peaks [\(help\)](#)

| #  | Immon.   | a         | a*        | a <sup>0</sup> | b         | b*        | b <sup>0</sup> | d         | d'        | Seq. | v         | w         | w'       | y         | y*        |
|----|----------|-----------|-----------|----------------|-----------|-----------|----------------|-----------|-----------|------|-----------|-----------|----------|-----------|-----------|
| 1  | 136.0757 | 136.0757  |           |                | 164.0706  |           |                | 44.0495   |           | Y    |           |           |          |           |           |
| 2  | 30.0338  | 193.0972  |           |                | 221.0921  |           |                |           |           | G    |           |           |          | 1339.7879 | 1322.7613 |
| 3  | 129.1135 | 349.1983  | 332.1717  |                | 377.1932  | 360.1666  |                | 264.1343  |           | R    | 1181.6711 | 1180.6758 |          | 1282.7664 | 1265.7398 |
| 4  | 70.0651  | 446.2510  | 429.2245  |                | 474.2459  | 457.2194  |                | 420.2354  |           | P    | 1084.6183 | 1083.6231 |          | 1126.6653 | 1109.6387 |
| 5  | 86.0964  | 559.3351  | 542.3085  |                | 587.3300  | 570.3035  |                | 517.2881  |           | L    | 971.5343  | 970.5390  |          | 1029.6125 | 1012.5860 |
| 6  | 86.0964  | 672.4192  | 655.3926  |                | 700.4141  | 683.3875  |                | 630.3722  |           | L    | 858.4502  | 857.4550  |          | 916.5285  | 899.5019  |
| 7  | 30.0338  | 729.4406  | 712.4141  |                | 757.4355  | 740.4090  |                |           |           | G    |           |           |          | 803.4444  | 786.4178  |
| 8  | 133.0430 | 889.4713  | 872.4447  |                | 917.4662  | 900.4396  |                | 800.4777  |           | C    | 641.3981  | 640.4028  |          | 746.4229  | 729.3964  |
| 9  | 74.0600  | 990.5189  | 973.4924  | 972.5084       | 1018.5139 | 1001.4873 | 1000.5033      | 974.5240  | 976.5033  | T    | 540.3504  | 553.3708  | 555.3501 | 586.3923  | 569.3657  |
| 10 | 86.0964  | 1103.6030 | 1086.5765 | 1085.5924      | 1131.5979 | 1114.5714 | 1113.5874      | 1075.5717 | 1089.5874 | I    | 427.2663  | 440.2867  | 454.3024 | 485.3446  | 468.3180  |
| 11 | 101.1073 | 1231.6980 | 1214.6714 | 1213.6874      | 1259.6929 | 1242.6663 | 1241.6823      | 1174.6401 |           | K    | 299.1714  | 298.1761  |          | 372.2605  | 355.2340  |
| 12 | 70.0651  | 1328.7507 | 1311.7242 | 1310.7402      | 1356.7457 | 1339.7191 | 1338.7351      | 1302.7351 |           | P    | 202.1186  | 201.1234  |          | 244.1656  | 227.1390  |
| 13 | 101.1073 |           |           |                |           |           |                |           |           | K    | 74.0237   | 73.0284   |          | 147.1128  | 130.0863  |

| Seq    | ya       | yb       | Seq    | ya       | yb       | Seq    | ya       | yb       |
|--------|----------|----------|--------|----------|----------|--------|----------|----------|
| GR     | 186.1349 | 214.1299 | GRP    | 283.1877 | 311.1826 | GRPL   | 396.2718 | 424.2667 |
| GRPLL  | 509.3558 | 537.3507 | GRPLL  | 566.3773 | 594.3722 | RP     | 226.1662 | 254.1612 |
| RPL    | 339.2503 | 367.2452 | RPLL   | 452.3344 | 480.3293 | RPLL   | 509.3558 | 537.3507 |
| RPLLGC | 669.3865 | 697.3814 | PL     | 183.1492 | 211.1441 | PLL    | 296.2333 | 324.2282 |
| PLLGC  | 353.2547 | 381.2496 | PLLGC  | 513.2854 | 541.2803 | PLLGCT | 614.3330 | 642.3280 |
| LL     | 199.1805 | 227.1754 | LLG    | 256.2020 | 284.1969 | LLGC   | 416.2326 | 444.2275 |
| LLGCT  | 517.2803 | 545.2752 | LLGCTI | 630.3643 | 658.3593 | LG     | 143.1179 | 171.1128 |
| LGC    | 303.1485 | 331.1435 | LGCT   | 404.1962 | 432.1911 | LGCTI  | 517.2803 | 545.2752 |

|               |          |          |              |          |                 |               |          |                 |
|---------------|----------|----------|--------------|----------|-----------------|---------------|----------|-----------------|
| <b>LGCTIK</b> | 645.3752 | 673.3702 | <b>GC</b>    | 190.0645 | 218.0594        | <b>GCT</b>    | 291.1122 | <b>319.1071</b> |
| <b>GCTI</b>   | 404.1962 | 432.1911 | <b>GCTIK</b> | 532.2912 | 560.2861        | <b>GCTIKP</b> | 629.3439 | 657.3389        |
| <b>CT</b>     | 234.0907 | 262.0856 | <b>CTI</b>   | 347.1748 | 375.1697        | <b>CTIK</b>   | 475.2697 | 503.2646        |
| <b>CTIKP</b>  | 572.3225 | 600.3174 | <b>TI</b>    | 187.1441 | 215.1390        | <b>TIK</b>    | 315.2391 | 343.2340        |
| <b>TIKP</b>   | 412.2918 | 440.2867 | <b>IK</b>    | 214.1914 | <b>242.1863</b> | <b>IKP</b>    | 311.2442 | 339.2391        |
| <b>KP</b>     | 198.1601 | 226.1550 |              |          |                 |               |          |                 |

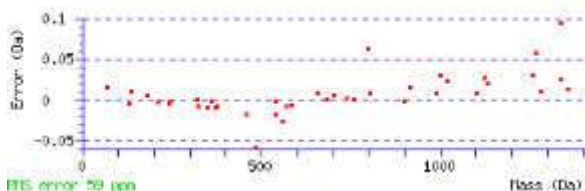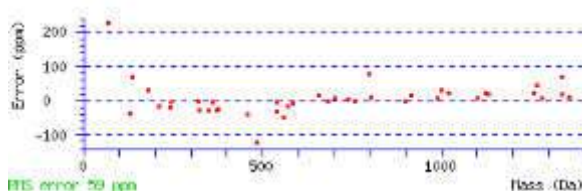

NCBI **BLAST** search of [YGRPLLGCTIKPK](#)

(Parameters: blastp, nr protein database, expect=20000, no filter, PAM30)

Other BLAST [web gateways](#)

#### All matches to this query

| Score | Mr(calc)  | Delta  | Sequence                      |
|-------|-----------|--------|-------------------------------|
| 56.7  | 1501.8439 | 0.0911 | <a href="#">YGRPILGCTIKPK</a> |
| 56.7  | 1501.8439 | 0.0911 | <a href="#">YGRPILGCTIKPK</a> |
| 56.7  | 1501.8439 | 0.0911 | <a href="#">YGRPLIGCTIKPK</a> |
| 56.7  | 1501.8439 | 0.0911 | <a href="#">YGRPLLGCTIKPK</a> |
| 56.7  | 1501.8439 | 0.0911 | <a href="#">YGRPLLGCTIKPK</a> |
| 56.7  | 1501.8439 | 0.0911 | <a href="#">YGRPLLGCTIKPK</a> |
| 56.7  | 1501.8439 | 0.0911 | <a href="#">YGRPLLGCTIKPK</a> |
| 56.7  | 1501.8439 | 0.0911 | <a href="#">YGRPLLGCTIKPK</a> |
| 56.7  | 1501.8439 | 0.0911 | <a href="#">YGRPLLGCTIKPK</a> |
| 56.7  | 1501.8439 | 0.0911 | <a href="#">YGRPLLGCTIKPK</a> |
| 56.7  | 1501.8439 | 0.0911 | <a href="#">YGRPLLGCTIKPK</a> |

Mascot: <http://www.matrixscience.com/>

**MATRIX SCIENCE Mascot Search Results**

**Peptide View Spot no 82**

MS/MS Fragmentation of **DRFVFCAEAIYK**

Found in **gi|11466795** in **NCBIInr**, ribulose-1,5-bisphosphate carboxylase/oxygenase large subunit [Oryza sativa Japonica Group]

Match to Query 25: 1517.831024 from(1518.838300,1+) intensity(0.0000) index(15)

Title: Label: C11, Spot\_Id: 216639, Peak\_List\_Id: 221222, MSMS Job\_Run\_Id: 21345, Comment:

Data file C:\Documents and Settings\Administrator\Desktop\farah BHU\RAJESH\12-1-13 raj\ppw\_C11\_135997697400.txt

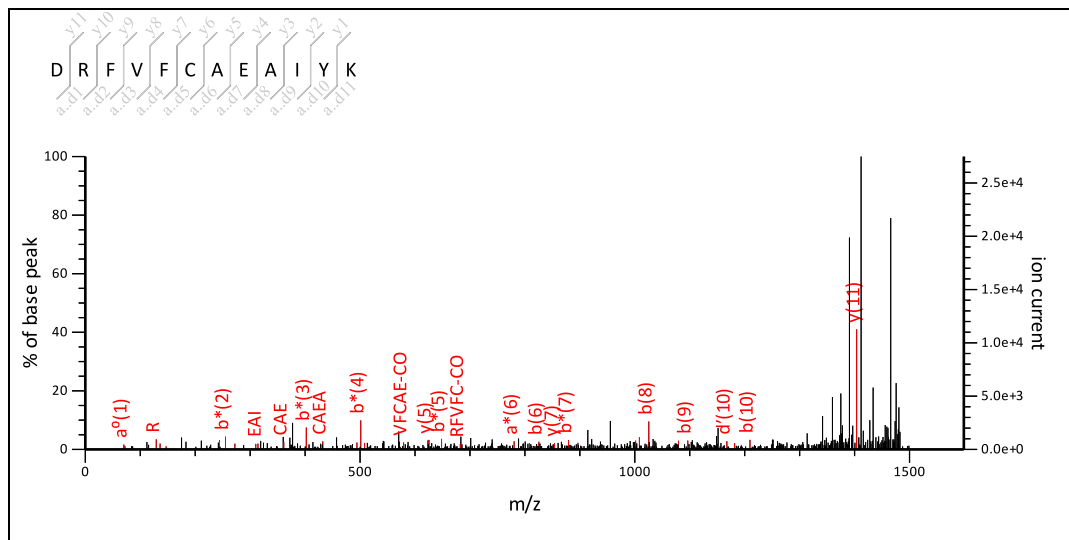

Navigation icons: Home, Back, Forward, Search, Print, Refresh. Range: 0 to 1598.83

Label all possible matches  Label matches used for scoring

Monoisotopic mass of neutral peptide Mr(calc): 1517.7337

Fixed modifications: Carbamidomethyl (C) (apply to specified residues or termini only)

Ions Score: 15 Expect: 1.8e+02

Matches : 39/194 fragment ions using 120 most intense peaks [\(help\)](#)

| #  | Immon.   | a         | a*        | a <sup>0</sup> | b         | b*        | b <sup>0</sup> | d         | d'        | Seq. | v         | w         | w'       | y         | y*        |
|----|----------|-----------|-----------|----------------|-----------|-----------|----------------|-----------|-----------|------|-----------|-----------|----------|-----------|-----------|
| 1  | 88.0393  | 88.0393   |           | 70.0287        | 116.0342  |           | 98.0237        | 44.0495   |           | D    |           |           |          |           |           |
| 2  | 129.1135 | 244.1404  | 227.1139  | 226.1299       | 272.1353  | 255.1088  | 254.1248       | 159.0764  |           | R    | 1302.6187 | 1301.6235 |          | 1403.7140 | 1386.6875 |
| 3  | 120.0808 | 391.2088  | 374.1823  | 373.1983       | 419.2037  | 402.1772  | 401.1932       |           |           | F    | 1155.5503 |           |          | 1247.6129 | 1230.5864 |
| 4  | 72.0808  | 490.2772  | 473.2507  | 472.2667       | 518.2722  | 501.2456  | 500.2616       | 476.2616  |           | V    | 1056.4819 | 1069.5023 |          | 1100.5445 | 1083.5179 |
| 5  | 120.0808 | 637.3457  | 620.3191  | 619.3351       | 665.3406  | 648.3140  | 647.3300       |           |           | F    | 909.4135  |           |          | 1001.4761 | 984.4495  |
| 6  | 133.0430 | 797.3763  | 780.3498  | 779.3657       | 825.3712  | 808.3447  | 807.3607       | 708.3828  |           | C    | 749.3828  | 748.3876  |          | 854.4077  | 837.3811  |
| 7  | 44.0495  | 868.4134  | 851.3869  | 850.4029       | 896.4083  | 879.3818  | 878.3978       |           |           | A    | 678.3457  |           |          | 694.3770  | 677.3505  |
| 8  | 102.0550 | 997.4560  | 980.4295  | 979.4454       | 1025.4509 | 1008.4244 | 1007.4404      | 939.4505  |           | E    | 549.3031  | 548.3079  |          | 623.3399  | 606.3134  |
| 9  | 44.0495  | 1068.4931 | 1051.4666 | 1050.4826      | 1096.4880 | 1079.4615 | 1078.4775      |           |           | A    | 478.2660  |           |          | 494.2973  | 477.2708  |
| 10 | 86.0964  | 1181.5772 | 1164.5506 | 1163.5666      | 1209.5721 | 1192.5456 | 1191.5615      | 1153.5459 | 1167.5615 | I    | 365.1819  | 378.2023  | 392.2180 | 423.2602  | 406.2336  |
| 11 | 136.0757 | 1344.6405 | 1327.6140 | 1326.6300      | 1372.6354 | 1355.6089 | 1354.6249      |           |           | Y    | 202.1186  |           |          | 310.1761  | 293.1496  |
| 12 | 101.1073 |           |           |                |           |           |                |           |           | K    | 74.0237   | 73.0284   |          | 147.1128  | 130.0863  |

| Seq    | ya       | yb       | Seq    | ya       | yb       | Seq    | ya       | yb       |
|--------|----------|----------|--------|----------|----------|--------|----------|----------|
| RF     | 276.1819 | 304.1768 | RFV    | 375.2503 | 403.2452 | RFVF   | 522.3187 | 550.3136 |
| RFVFC  | 682.3494 | 710.3443 | FV     | 219.1492 | 247.1441 | FVF    | 366.2176 | 394.2125 |
| FVFC   | 526.2483 | 554.2432 | FVFC   | 597.2854 | 625.2803 | VF     | 219.1492 | 247.1441 |
| VFC    | 379.1798 | 407.1748 | VFCA   | 450.2170 | 478.2119 | VFCAE  | 579.2595 | 607.2545 |
| VFCAEA | 650.2967 | 678.2916 | FC     | 280.1114 | 308.1063 | FCA    | 351.1485 | 379.1435 |
| FCAE   | 480.1911 | 508.1860 | FCAEA  | 551.2282 | 579.2232 | FCAEAI | 664.3123 | 692.3072 |
| CA     | 204.0801 | 232.0750 | CAE    | 333.1227 | 361.1176 | CAEA   | 404.1598 | 432.1547 |
| CAEAI  | 517.2439 | 545.2388 | CAEAIY | 680.3072 | 708.3021 | AE     | 173.0921 | 201.0870 |
| AEA    | 244.1292 | 272.1241 | AEAI   | 357.2132 | 385.2082 | AEAIY  | 520.2766 | 548.2715 |

|                    |          |          |                     |          |                          |                      |          |          |
|--------------------|----------|----------|---------------------|----------|--------------------------|----------------------|----------|----------|
| <a href="#">EA</a> | 173.0921 | 201.0870 | <a href="#">EAI</a> | 286.1761 | <a href="#">314.1710</a> | <a href="#">EAIY</a> | 449.2395 | 477.2344 |
| <a href="#">AI</a> | 157.1335 | 185.1285 | <a href="#">AIY</a> | 320.1969 | 348.1918                 | <a href="#">IY</a>   | 249.1598 | 277.1547 |

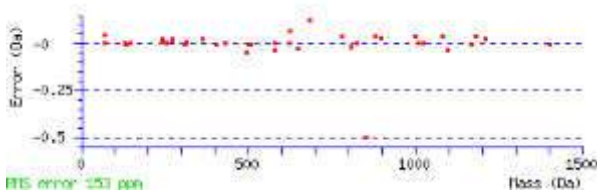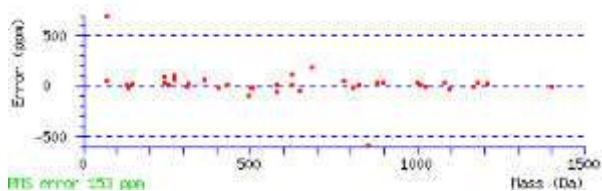

NCBI BLAST search of [DRFVFCAEAIYK](#)

(Parameters: blastp, nr protein database, expect=20000, no filter, PAM30)

Other BLAST [web gateways](#)

All matches to this query

| Score | Mr(calc)  | Delta  | Sequence                     |
|-------|-----------|--------|------------------------------|
| 15.9  | 1517.7007 | 0.1304 | <a href="#">DRFVMCAEAIYK</a> |
| 14.9  | 1517.7337 | 0.0974 | <a href="#">DRFVFCAEAIYK</a> |
| 14.9  | 1517.7337 | 0.0974 | <a href="#">DRFVFCAEAIYK</a> |
| 14.9  | 1517.7337 | 0.0974 | <a href="#">DRFVFCAEAIYK</a> |
| 14.9  | 1517.7337 | 0.0974 | <a href="#">DRFVFCAEAIYK</a> |
| 14.9  | 1517.7337 | 0.0974 | <a href="#">DRFVFCAEAIYK</a> |
| 14.9  | 1517.7337 | 0.0974 | <a href="#">DRFVFCAEAIYK</a> |
| 14.9  | 1517.7337 | 0.0974 | <a href="#">DRFVFCAEAIYK</a> |
| 14.9  | 1517.7337 | 0.0974 | <a href="#">DRFVFCAEAIYK</a> |
| 14.9  | 1517.7337 | 0.0974 | <a href="#">DRFVFCAEAIYK</a> |
| 14.9  | 1517.7337 | 0.0974 | <a href="#">DRFVFCAEAIYK</a> |
| 14.3  | 1517.7337 | 0.0974 | <a href="#">DRFVFCAEALYK</a> |

Mascot: <http://www.matrixscience.com/>

**MATRIX SCIENCE Mascot Search Results**

**Peptide View Spot no 82**

MS/MS Fragmentation of **WSPELAAACEIWK**

Found in **gi11466795** in **NCBI nr**, ribulose-1,5-bisphosphate carboxylase/oxygenase large subunit [Oryza sativa Japonica Group]

Match to Query 27: 1559.830624 from(1560.837900,1+) intensity(0.0000) index(16)

Title: Label: C11, Spot\_Id: 216639, Peak\_List\_Id: 221213, MSMS Job\_Run\_Id: 21345, Comment:

Data file C:\Documents and Settings\Administrator\Desktop\farah BHU\RAJESH\12-1-13 raj\ppw\_C11\_135997697400.txt

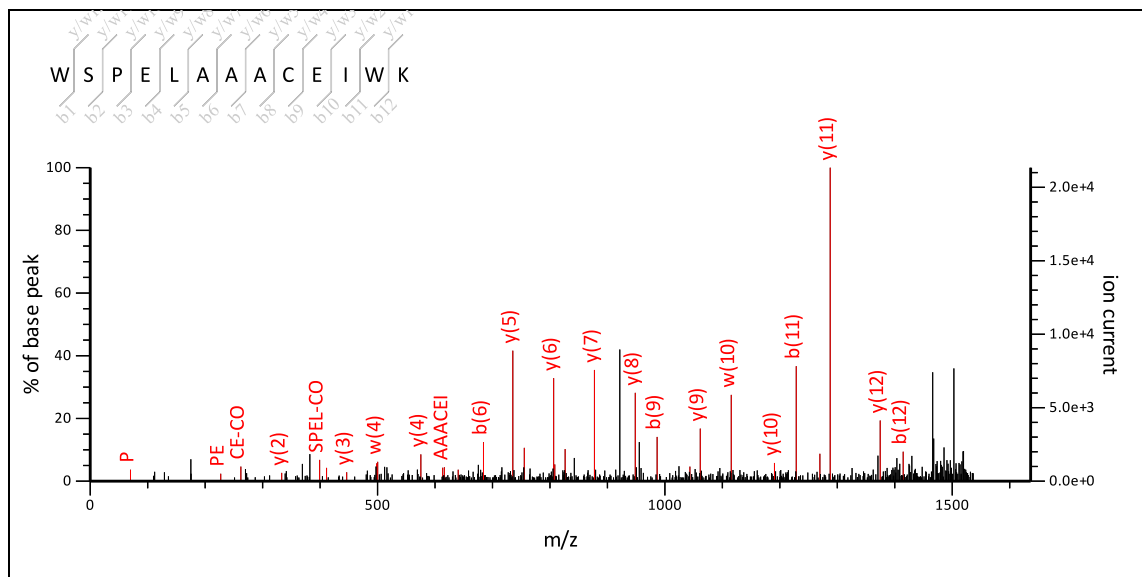

Navigation icons: ? Home Back Forward Search [0] to [1636.45] Search

Label all possible matches  Label matches used for scoring

Monoisotopic mass of neutral peptide **Mr(calc)**: 1559.7442  
**Fixed modifications**: Carbamidomethyl (C) (apply to specified residues or termini only)  
**Ions Score**: 65 **Expect**: 0.0017  
**Matches**: 37/203 fragment ions using 60 most intense peaks ([help](#))

| #  | Immon.   | a         | a <sup>0</sup> | b         | b <sup>0</sup> | d         | d'        | Seq. | v         | w         | w'       | y         | y*        | y <sup>0</sup> | #  |
|----|----------|-----------|----------------|-----------|----------------|-----------|-----------|------|-----------|-----------|----------|-----------|-----------|----------------|----|
| 1  | 159.0917 | 159.0917  |                | 187.0866  |                | 44.0495   |           | W    |           |           |          |           |           |                | 13 |
| 2  | 60.0444  | 246.1237  | 228.1131       | 274.1186  | 256.1081       | 230.1288  |           | S    | 1342.6460 | 1341.6508 |          | 1374.6722 | 1357.6457 | 1356.6616      | 12 |
| 3  | 70.0651  | 343.1765  | 325.1659       | 371.1714  | 353.1608       | 317.1608  |           | P    | 1245.5932 | 1244.5980 |          | 1287.6402 | 1270.6136 | 1269.6296      | 11 |
| 4  | 102.0550 | 472.2191  | 454.2085       | 500.2140  | 482.2034       | 414.2136  |           | E    | 1116.5506 | 1115.5554 |          | 1190.5874 | 1173.5609 | 1172.5769      | 10 |
| 5  | 86.0964  | 585.3031  | 567.2926       | 613.2980  | 595.2875       | 543.2562  |           | L    | 1003.4666 | 1002.4713 |          | 1061.5448 | 1044.5183 | 1043.5343      | 9  |
| 6  | 44.0495  | 656.3402  | 638.3297       | 684.3352  | 666.3246       |           |           | A    | 932.4295  |           |          | 948.4608  | 931.4342  | 930.4502       | 8  |
| 7  | 44.0495  | 727.3774  | 709.3668       | 755.3723  | 737.3617       |           |           | A    | 861.3924  |           |          | 877.4237  | 860.3971  | 859.4131       | 7  |
| 8  | 44.0495  | 798.4145  | 780.4039       | 826.4094  | 808.3988       |           |           | A    | 790.3552  |           |          | 806.3865  | 789.3600  | 788.3760       | 6  |
| 9  | 133.0430 | 958.4451  | 940.4345       | 986.4400  | 968.4295       | 869.4516  |           | C    | 630.3246  | 629.3293  |          | 735.3494  | 718.3229  | 717.3389       | 5  |
| 10 | 102.0550 | 1087.4877 | 1069.4771      | 1115.4826 | 1097.4721      | 1029.4822 |           | E    | 501.2820  | 500.2867  |          | 575.3188  | 558.2922  | 557.3082       | 4  |
| 11 | 86.0964  | 1200.5718 | 1182.5612      | 1228.5667 | 1210.5561      | 1172.5405 | 1186.5561 | I    | 388.1979  | 401.2183  | 415.2340 | 446.2762  | 429.2496  |                | 3  |
| 12 | 159.0917 | 1386.6511 | 1368.6405      | 1414.6460 | 1396.6354      |           |           | W    | 202.1186  |           |          | 333.1921  | 316.1656  |                | 2  |
| 13 | 101.1073 |           |                |           |                |           |           | K    | 74.0237   | 73.0284   |          | 147.1128  | 130.0863  |                | 1  |

| Seq   | ya       | yb       | Seq    | ya       | yb       | Seq     | ya       | yb       |
|-------|----------|----------|--------|----------|----------|---------|----------|----------|
| SP    | 157.0972 | 185.0921 | SPE    | 286.1397 | 314.1347 | SPEL    | 399.2238 | 427.2187 |
| SPELA | 470.2609 | 498.2558 | SPELAA | 541.2980 | 569.2930 | SPELAAA | 612.3352 | 640.3301 |
| PE    | 199.1077 | 227.1026 | PEL    | 312.1918 | 340.1867 | PELA    | 383.2289 | 411.2238 |
| PELAA | 454.2660 | 482.2609 | PELAAA | 525.3031 | 553.2980 | PELAAAC | 685.3338 | 713.3287 |



|               |                 |                 |               |          |                 |               |                 |                 |
|---------------|-----------------|-----------------|---------------|----------|-----------------|---------------|-----------------|-----------------|
| <b>EL</b>     | 215.1390        | 243.1339        | <b>ELA</b>    | 286.1761 | 314.1710        | <b>ELAA</b>   | 357.2132        | 385.2082        |
| <b>ELAAA</b>  | 428.2504        | 456.2453        | <b>ELAAAC</b> | 588.2810 | <b>616.2759</b> | <b>LA</b>     | 157.1335        | 185.1285        |
| <b>LAA</b>    | 228.1707        | 256.1656        | <b>LAAA</b>   | 299.2078 | 327.2027        | <b>LAAAC</b>  | 459.2384        | 487.2333        |
| <b>LAAACE</b> | 588.2810        | <b>616.2759</b> | <b>AA</b>     | 115.0866 | 143.0815        | <b>AAA</b>    | 186.1237        | 214.1186        |
| <b>AAAC</b>   | 346.1544        | 374.1493        | <b>AAACE</b>  | 475.1969 | 503.1919        | <b>AAACEI</b> | 588.2810        | <b>616.2759</b> |
| <b>AA</b>     | 115.0866        | 143.0815        | <b>AAC</b>    | 275.1172 | 303.1122        | <b>AAACE</b>  | 404.1598        | 432.1547        |
| <b>AAACEI</b> | 517.2439        | 545.2388        | <b>AC</b>     | 204.0801 | 232.0750        | <b>ACE</b>    | <b>333.1227</b> | 361.1176        |
| <b>ACEI</b>   | <b>446.2068</b> | 474.2017        | <b>ACEIW</b>  | 632.2861 | 660.2810        | <b>CE</b>     | <b>262.0856</b> | 290.0805        |
| <b>CEI</b>    | 375.1697        | 403.1646        | <b>CEIW</b>   | 561.2490 | 589.2439        | <b>EI</b>     | 215.1390        | 243.1339        |
| <b>EIW</b>    | 401.2183        | 429.2132        | <b>IW</b>     | 272.1757 | 300.1707        |               |                 |                 |

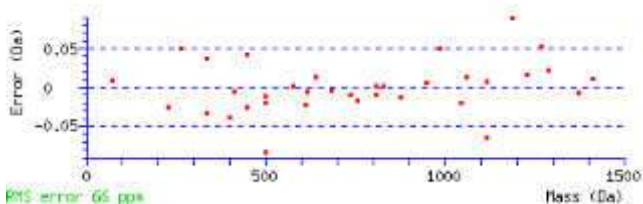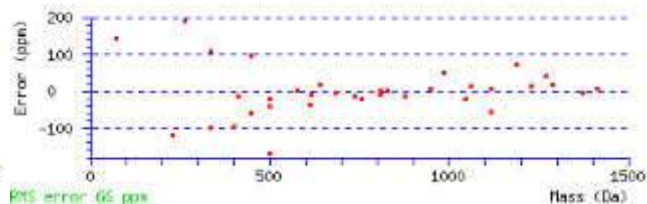

NCBI BLAST search of [WSPELAAACEIWK](#)

(Parameters: blastp, nr protein database, expect=20000, no filter, PAM30)

Other BLAST [web gateways](#)

#### All matches to this query

| Score | Mr(calc)  | Delta  | Sequence                       |
|-------|-----------|--------|--------------------------------|
| 64.7  | 1559.7442 | 0.0864 | <a href="#">WSPEIAAAACEIWK</a> |
| 64.7  | 1559.7442 | 0.0864 | <a href="#">WSPELAAACEIWK</a>  |
| 64.7  | 1559.7442 | 0.0864 | <a href="#">WSPELAAACEIWK</a>  |
| 64.7  | 1559.7442 | 0.0864 | <a href="#">WSPELAAACEIWK</a>  |
| 64.7  | 1559.7442 | 0.0864 | <a href="#">WSPELAAACEIWK</a>  |
| 64.7  | 1559.7442 | 0.0864 | <a href="#">WSPELAAACEIWK</a>  |
| 64.7  | 1559.7442 | 0.0864 | <a href="#">WSPELAAACEIWK</a>  |
| 64.7  | 1559.7442 | 0.0864 | <a href="#">WSPELAAACEIWK</a>  |
| 64.7  | 1559.7442 | 0.0864 | <a href="#">WSPELAAACEIWK</a>  |
| 64.7  | 1559.7442 | 0.0864 | <a href="#">WSPELAAACEIWK</a>  |
| 64.7  | 1559.7442 | 0.0864 | <a href="#">WSPELAAACEIWK</a>  |

Mascot: <http://www.matrixscience.com/>

**MATRIX SCIENCE Mascot Search Results**

**Peptide View Spot no 82**

MS/MS Fragmentation of **TFQGPPHGIQVERDK**

Found in **gi|11466795** in **NCBI**nr, ribulose-1,5-bisphosphate carboxylase/oxygenase large subunit [Oryza sativa Japonica Group]

Match to Query 31: 1707.967824 from(1708.975100,1+) intensity(0.0000) index(18)

Title: Label: C11, Spot\_Id: 216639, Peak\_List\_Id: 221209, MSMS Job\_Run\_Id: 21345, Comment:

Data file C:\Documents and Settings\Administrator\Desktop\farah BHU\RAJESH\12-1-13 raj\ppw\_C11\_135997697400.txt

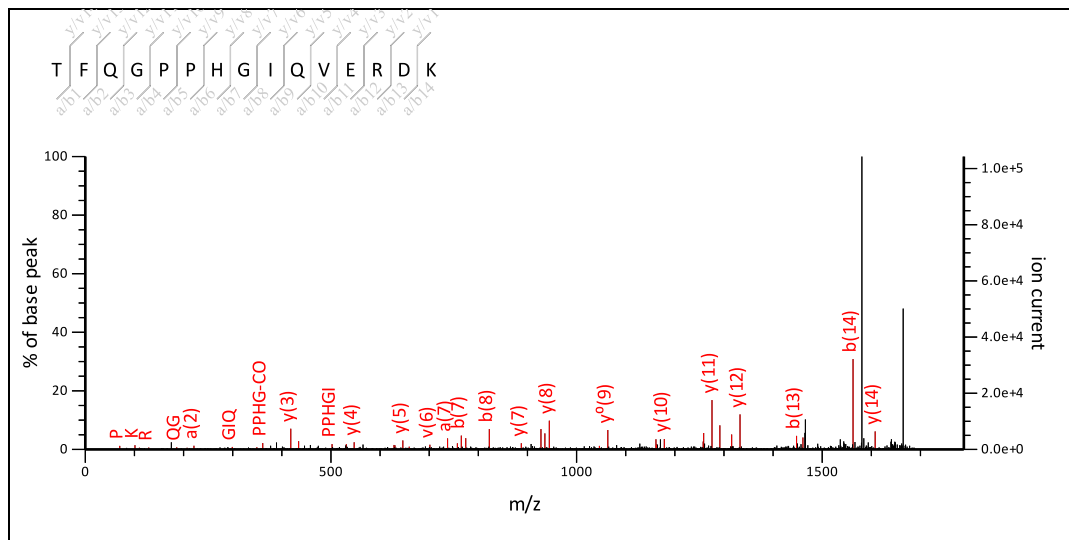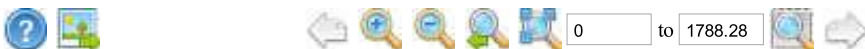

Label all possible matches  Label matches used for scoring

Monoisotopic mass of neutral peptide Mr(calc): 1707.8693

Fixed modifications: Carbamidomethyl (C) (apply to specified residues or termini only)

Ions Score: 86 Expect: 1.5e-05

Matches : 57/273 fragment ions using 68 most intense peaks [\(help\)](#)

| #  | Immon.          | a               | a*              | a <sup>0</sup> | b                | b*               | b <sup>0</sup> | d         | d'       | Seq. | v               | w         | w'       | y                | y*                    |
|----|-----------------|-----------------|-----------------|----------------|------------------|------------------|----------------|-----------|----------|------|-----------------|-----------|----------|------------------|-----------------------|
| 1  | 74.0600         | 74.0600         |                 | 56.0495        | 102.0550         |                  | 84.0444        | 44.0495   |          | T    |                 |           |          |                  |                       |
| 2  | 120.0808        | <b>221.1285</b> |                 | 203.1179       | 249.1234         |                  | 231.1128       |           |          | F    | 1515.7663       |           |          | <b>1607.8289</b> | 1590.8023 1589        |
| 3  | <b>101.0709</b> | <b>349.1870</b> | 332.1605        | 331.1765       | 377.1819         | 360.1554         | 359.1714       | 292.1656  |          | Q    | 1387.7077       | 1386.7124 |          | <b>1460.7605</b> | 1443.7339 1442        |
| 4  | 30.0338         | 406.2085        | <b>389.1819</b> | 388.1979       | <b>434.2034</b>  | 417.1769         | 416.1928       |           |          | G    |                 |           |          | <b>1332.7019</b> | <b>1315.6753</b> 1314 |
| 5  | <b>70.0651</b>  | 503.2613        | 486.2347        | 485.2507       | <b>531.2562</b>  | 514.2296         | 513.2456       | 477.2456  |          | P    | 1233.6335       | 1232.6382 |          | <b>1275.6804</b> | <b>1258.6539</b> 1257 |
| 6  | <b>70.0651</b>  | 600.3140        | 583.2875        | 582.3035       | <b>628.3089</b>  | 611.2824         | 610.2984       | 574.2984  |          | P    | 1136.5807       | 1135.5854 |          | <b>1178.6276</b> | <b>1161.6011</b> 1160 |
| 7  | <b>110.0713</b> | <b>737.3729</b> | 720.3464        | 719.3624       | <b>765.3679</b>  | 748.3413         | 747.3573       |           |          | H    | 999.5218        |           |          | 1081.5749        | 1064.5483 1063        |
| 8  | 30.0338         | 794.3944        | 777.3679        | 776.3838       | <b>822.3893</b>  | 805.3628         | 804.3787       |           |          | G    |                 |           |          | <b>944.5160</b>  | <b>927.4894</b> 926   |
| 9  | 86.0964         | 907.4785        | 890.4519        | 889.4679       | <b>935.4734</b>  | 918.4468         | 917.4628       | 879.4472  | 893.4628 | I    | 829.4163        | 842.4367  | 856.4523 | <b>887.4945</b>  | 870.4680 869          |
| 10 | <b>101.0709</b> | 1035.5370       | 1018.5105       | 1017.5265      | <b>1063.5320</b> | <b>1046.5054</b> | 1045.5214      | 978.5156  |          | Q    | <b>701.3577</b> | 700.3624  |          | <b>774.4104</b>  | <b>757.3839</b> 756   |
| 11 | 72.0808         | 1134.6055       | 1117.5789       | 1116.5949      | <b>1162.6004</b> | 1145.5738        | 1144.5898      | 1120.5898 |          | V    | 602.2893        | 615.3097  |          | <b>646.3519</b>  | 629.3253 628          |
| 12 | 102.0550        | 1263.6480       | 1246.6215       | 1245.6375      | <b>1291.6430</b> | 1274.6164        | 1273.6324      | 1205.6426 |          | E    | 473.2467        | 472.2514  |          | <b>547.2835</b>  | 530.2569 529          |
| 13 | <b>129.1135</b> | 1419.7492       | 1402.7226       | 1401.7386      | <b>1447.7441</b> | 1430.7175        | 1429.7335      | 1334.6852 |          | R    | 317.1456        | 316.1503  |          | <b>418.2409</b>  | 401.2143 400          |
| 14 | 88.0393         | 1534.7761       | 1517.7496       | 1516.7655      | <b>1562.7710</b> | 1545.7445        | 1544.7605      | 1490.7863 |          | D    | 202.1186        | 201.1234  |          | 262.1397         | 245.1132 244          |
| 15 | <b>101.1073</b> |                 |                 |                |                  |                  |                |           |          | K    | 74.0237         | 73.0284   |          | 147.1128         | 130.0863              |

| Seq   | ya              | yb              | Seq    | ya              | yb       | Seq    | ya              | yb              |
|-------|-----------------|-----------------|--------|-----------------|----------|--------|-----------------|-----------------|
| FQ    | 248.1394        | 276.1343        | FQG    | 305.1608        | 333.1557 | FQGP   | 402.2136        | 430.2085        |
| FQGP  | 499.2663        | 527.2613        | FQPPH  | 636.3253        | 664.3202 | FQPPHG | 693.3467        | 721.3416        |
| QG    | 158.0924        | <b>186.0873</b> | QGP    | 255.1452        | 283.1401 | QGPP   | 352.1979        | 380.1928        |
| QGPPH | 489.2568        | 517.2518        | QGPPHG | 546.2783        | 574.2732 | QGPPHI | <b>659.3624</b> | 687.3573        |
| GP    | 127.0866        | 155.0815        | GPP    | 224.1394        | 252.1343 | GPPH   | <b>361.1983</b> | <b>389.1932</b> |
| GPPHG | <b>418.2197</b> | 446.2146        | GPPHI  | <b>531.3038</b> | 559.2987 | GPPHIQ | <b>659.3624</b> | 687.3573        |

|        |          |          |        |          |          |        |          |          |
|--------|----------|----------|--------|----------|----------|--------|----------|----------|
| PP     | 167.1179 | 195.1128 | PPH    | 304.1768 | 332.1717 | PPHG   | 361.1983 | 389.1932 |
| PPHGI  | 474.2823 | 502.2772 | PPHGIQ | 602.3409 | 630.3358 | PH     | 207.1240 | 235.1190 |
| PHG    | 264.1455 | 292.1404 | PHGI   | 377.2296 | 405.2245 | PHGIQ  | 505.2881 | 533.2831 |
| PHGIQV | 604.3566 | 632.3515 | HG     | 167.0927 | 195.0877 | HGI    | 280.1768 | 308.1717 |
| HGIQ   | 408.2354 | 436.2303 | HGIQV  | 507.3038 | 535.2987 | HGIQVE | 636.3464 | 664.3413 |
| GI     | 143.1179 | 171.1128 | GIQ    | 271.1765 | 299.1714 | GIQV   | 370.2449 | 398.2398 |
| GIQVE  | 499.2875 | 527.2824 | GIQVER | 655.3886 | 683.3835 | IQ     | 214.1550 | 242.1499 |
| IQV    | 313.2234 | 341.2183 | IQVE   | 442.2660 | 470.2609 | IQVER  | 598.3671 | 626.3620 |
| QV     | 200.1394 | 228.1343 | QVE    | 329.1819 | 357.1769 | QVER   | 485.2831 | 513.2780 |
| QVERD  | 600.3100 | 628.3049 | VE     | 201.1234 | 229.1183 | VER    | 357.2245 | 385.2194 |
| VERD   | 472.2514 | 500.2463 | ER     | 258.1561 | 286.1510 | ERD    | 373.1830 | 401.1779 |
| RD     | 244.1404 | 272.1353 |        |          |          |        |          |          |

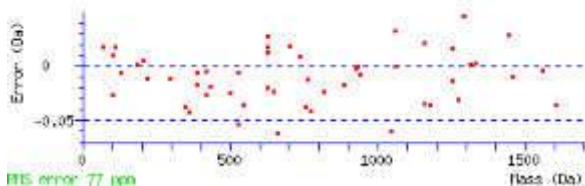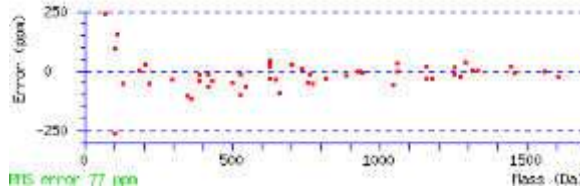

NCBI BLAST search of [TFOGPPHGIQVERDK](#)  
 (Parameters: blastp, nr protein database, expect=20000, no filter, PAM30)  
 Other BLAST [web gateways](#)

All matches to this query

| Score | Mr(calc)  | Delta  | Sequence                        |
|-------|-----------|--------|---------------------------------|
| 90.9  | 1707.8805 | 0.0873 | <a href="#">TFOGPPHGIQVERS</a>  |
| 87.4  | 1707.8363 | 0.1316 | <a href="#">TMOGPPHGIQVERDK</a> |
| 87.4  | 1707.8693 | 0.0985 | <a href="#">TFOGPPHGLOVERDK</a> |
| 87.4  | 1707.8693 | 0.0985 | <a href="#">TFOGPPHGLOVERDK</a> |
| 85.9  | 1707.8693 | 0.0985 | <a href="#">TFOGPPHGIQVERDK</a> |
| 85.9  | 1707.8693 | 0.0985 | <a href="#">TFOGPPHGIQVERDK</a> |
| 85.9  | 1707.8693 | 0.0985 | <a href="#">TFOGPPHGIQVERDK</a> |
| 85.9  | 1707.8693 | 0.0985 | <a href="#">TFOGPPHGIQVERDK</a> |
| 85.9  | 1707.8693 | 0.0985 | <a href="#">TFOGPPHGIQVERDK</a> |
| 85.9  | 1707.8693 | 0.0985 | <a href="#">TFOGPPHGIQVERDK</a> |

Mascot: <http://www.matrixscience.com/>

**MATRIX SCIENCE Mascot Search Results**

**Peptide View Spot no 82**

MS/MS Fragmentation of **SACKWSP ELAAACEIWK**

Found in **gi|11466795** in **NCBI**nr, ribulose-1,5-bisphosphate carboxylase/oxygenase large subunit [Oryza sativa Japonica Group]

Match to Query 35: 2006.040424 from(2007.047700,1+) intensity(0.0000) index(20)

Title: Label: C11, Spot\_Id: 216639, Peak\_List\_Id: 221203, MSMS Job\_Run\_Id: 21345, Comment:

Data file C:\Documents and Settings\Administrator\Desktop\farah BHU\RAJESH\12-1-13 rajppw\_C11\_135997697400.txt

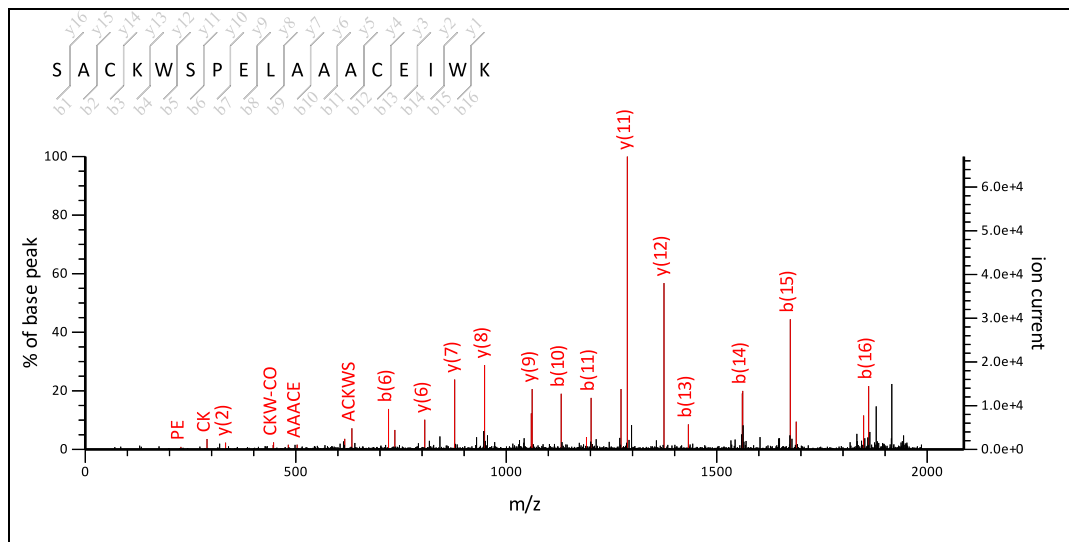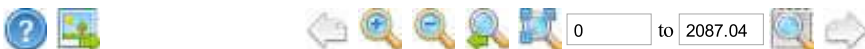

Label all possible matches  Label matches used for scoring

Monoisotopic mass of neutral peptide Mr(calc): 2005.9390

Fixed modifications: Carbamidomethyl (C) (apply to specified residues or termini only)

Ions Score: 111 Expect: 3.3e-08

Matches : 36/305 fragment ions using 40 most intense peaks [\(help\)](#)

| #  | Immon.   | a         | a*        | a <sup>0</sup> | b         | b*        | b <sup>0</sup> | d         | d'        | Seq. | v         | w         | w'       | y         | y*        |
|----|----------|-----------|-----------|----------------|-----------|-----------|----------------|-----------|-----------|------|-----------|-----------|----------|-----------|-----------|
| 1  | 60.0444  | 60.0444   |           | 42.0338        | 88.0393   |           | 70.0287        | 44.0495   |           | S    |           |           |          |           |           |
| 2  | 44.0495  | 131.0815  |           | 113.0709       | 159.0764  |           | 141.0659       |           |           | A    | 1903.8830 |           |          | 1919.9143 | 1902.8877 |
| 3  | 133.0430 | 291.1122  |           | 273.1016       | 319.1071  |           | 301.0965       | 202.1186  |           | C    | 1743.8523 | 1742.8571 |          | 1848.8771 | 1831.8506 |
| 4  | 101.1073 | 419.2071  | 402.1806  | 401.1966       | 447.2020  | 430.1755  | 429.1915       | 362.1493  |           | K    | 1615.7573 | 1614.7621 |          | 1688.8465 | 1671.8199 |
| 5  | 159.0917 | 605.2864  | 588.2599  | 587.2759       | 633.2813  | 616.2548  | 615.2708       |           |           | W    | 1429.6780 |           |          | 1560.7515 | 1543.7250 |
| 6  | 60.0444  | 692.3185  | 675.2919  | 674.3079       | 720.3134  | 703.2868  | 702.3028       | 676.3235  |           | S    | 1342.6460 | 1341.6508 |          | 1374.6722 | 1357.6457 |
| 7  | 70.0651  | 789.3712  | 772.3447  | 771.3607       | 817.3661  | 800.3396  | 799.3556       | 763.3556  |           | P    | 1245.5932 | 1244.5980 |          | 1287.6402 | 1270.6136 |
| 8  | 102.0550 | 918.4138  | 901.3873  | 900.4032       | 946.4087  | 929.3822  | 928.3982       | 860.4083  |           | E    | 1116.5506 | 1115.5554 |          | 1190.5874 | 1173.5609 |
| 9  | 86.0964  | 1031.4979 | 1014.4713 | 1013.4873      | 1059.4928 | 1042.4662 | 1041.4822      | 989.4509  |           | L    | 1003.4666 | 1002.4713 |          | 1061.5448 | 1044.5183 |
| 10 | 44.0495  | 1102.5350 | 1085.5084 | 1084.5244      | 1130.5299 | 1113.5034 | 1112.5193      |           |           | A    | 932.4295  |           |          | 948.4608  | 931.4342  |
| 11 | 44.0495  | 1173.5721 | 1156.5456 | 1155.5615      | 1201.5670 | 1184.5405 | 1183.5565      |           |           | A    | 861.3924  |           |          | 877.4237  | 860.3971  |
| 12 | 44.0495  | 1244.6092 | 1227.5827 | 1226.5987      | 1272.6041 | 1255.5776 | 1254.5936      |           |           | A    | 790.3552  |           |          | 806.3865  | 789.3600  |
| 13 | 133.0430 | 1404.6399 | 1387.6133 | 1386.6293      | 1432.6348 | 1415.6082 | 1414.6242      | 1315.6463 |           | C    | 630.3246  | 629.3293  |          | 735.3494  | 718.3229  |
| 14 | 102.0550 | 1533.6825 | 1516.6559 | 1515.6719      | 1561.6774 | 1544.6508 | 1543.6668      | 1475.6770 |           | E    | 501.2820  | 500.2867  |          | 575.3188  | 558.2922  |
| 15 | 86.0964  | 1646.7665 | 1629.7400 | 1628.7560      | 1674.7614 | 1657.7349 | 1656.7509      | 1618.7352 | 1632.7509 | I    | 388.1979  | 401.2183  | 415.2340 | 446.2762  | 429.2496  |
| 16 | 159.0917 | 1832.8458 | 1815.8193 | 1814.8353      | 1860.8408 | 1843.8142 | 1842.8302      |           |           | W    | 202.1186  |           |          | 333.1921  | 316.1656  |
| 17 | 101.1073 |           |           |                |           |           |                |           |           | K    | 74.0237   | 73.0284   |          | 147.1128  | 130.0863  |

| Seq   | ya       | yb       | Seq   | ya       | yb       | Seq   | ya       | yb       |
|-------|----------|----------|-------|----------|----------|-------|----------|----------|
| AC    | 204.0801 | 232.0750 | ACK   | 332.1751 | 360.1700 | ACKW  | 518.2544 | 546.2493 |
| ACKWS | 605.2864 | 633.2813 | CK    | 261.1380 | 289.1329 | CKW   | 447.2173 | 475.2122 |
| CKWS  | 534.2493 | 562.2442 | CKWSP | 631.3021 | 659.2970 | KW    | 287.1866 | 315.1816 |
| KWS   | 374.2187 | 402.2136 | KWSP  | 471.2714 | 499.2663 | KWSPE | 600.3140 | 628.3089 |

|        |          |          |         |          |          |        |          |          |
|--------|----------|----------|---------|----------|----------|--------|----------|----------|
| WS     | 246.1237 | 274.1186 | WSP     | 343.1765 | 371.1714 | WSPE   | 472.2191 | 500.2140 |
| WSP    | 585.3031 | 613.2980 | WSP     | 656.3402 | 684.3352 | SP     | 157.0972 | 185.0921 |
| SPE    | 286.1397 | 314.1347 | SPEL    | 399.2238 | 427.2187 | SPELA  | 470.2609 | 498.2558 |
| SPEL   | 541.2980 | 569.2930 | SPELAAA | 612.3352 | 640.3301 | PE     | 199.1077 | 227.1026 |
| PEL    | 312.1918 | 340.1867 | PELA    | 383.2289 | 411.2238 | PELAA  | 454.2660 | 482.2609 |
| PELAAA | 525.3031 | 553.2980 | PELAAAC | 685.3338 | 713.3287 | EL     | 215.1390 | 243.1339 |
| ELA    | 286.1761 | 314.1710 | ELAA    | 357.2132 | 385.2082 | ELAAA  | 428.2504 | 456.2453 |
| ELAAA  | 588.2810 | 616.2759 | LA      | 157.1335 | 185.1285 | LAA    | 228.1707 | 256.1656 |
| LAAA   | 299.2078 | 327.2027 | LAAAC   | 459.2384 | 487.2333 | LAAACE | 588.2810 | 616.2759 |
| AA     | 115.0866 | 143.0815 | AAA     | 186.1237 | 214.1186 | AAAC   | 346.1544 | 374.1493 |
| AAACE  | 475.1969 | 503.1919 | AAACEI  | 588.2810 | 616.2759 | AA     | 115.0866 | 143.0815 |
| AAC    | 275.1172 | 303.1122 | AACE    | 404.1598 | 432.1547 | AACEI  | 517.2439 | 545.2388 |
| AC     | 204.0801 | 232.0750 | ACE     | 333.1227 | 361.1176 | ACEI   | 446.2068 | 474.2017 |
| ACEI   | 632.2861 | 660.2810 | CE      | 262.0856 | 290.0805 | CEI    | 375.1697 | 403.1646 |
| CEI    | 561.2490 | 589.2439 | EI      | 215.1390 | 243.1339 | EIW    | 401.2183 | 429.2132 |
| IW     | 272.1757 | 300.1707 |         |          |          |        |          |          |

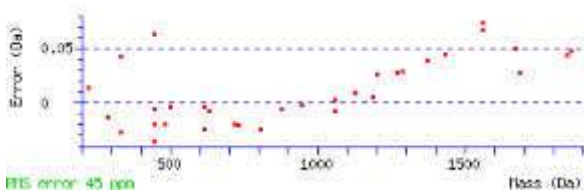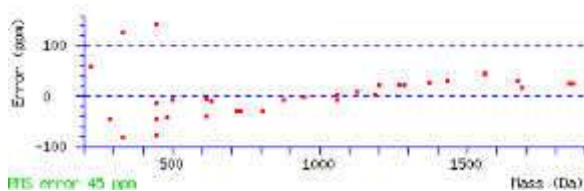

NCBI BLAST search of [SACKWSPELAAACEIWK](#)

(Parameters: blastp, nr protein database, expect=20000, no filter, PAM30)

Other BLAST [web gateways](#)

#### All matches to this query

| Score | Mr(calc)  | Delta   | Sequence                            |
|-------|-----------|---------|-------------------------------------|
| 110.6 | 2005.9390 | 0.1015  | <a href="#">SACKWSPELAAACEIWK</a>   |
| 79.8  | 2006.8866 | -0.8462 | <a href="#">SACKWSPELAAACEIWE</a>   |
| 66.8  | 2004.9615 | 1.0790  | <a href="#">ETSKWSPELAAACEIWK</a>   |
| 64.9  | 2006.8866 | -0.8462 | <a href="#">EACSWSPELAAACEIWK</a>   |
| 27.4  | 2004.9977 | 1.0428  | <a href="#">NSSRSYHIIAASESQSLR</a>  |
| 22.7  | 2007.0380 | -0.9976 | <a href="#">MVSLLLETMSVDVAITNR</a>  |
| 19.4  | 2005.0819 | 0.9585  | <a href="#">AAPFGELLKIVECLOSGR</a>  |
| 18.5  | 2005.9844 | 0.0560  | <a href="#">KDDDDLLISSGLSIWK</a>    |
| 14.6  | 2006.0334 | 0.0071  | <a href="#">OKTGASFILPASAOHGHEK</a> |
| 14.3  | 2005.9449 | 0.0956  | <a href="#">SGVGCKMEIVPETEQGSAK</a> |

Mascot: <http://www.matrixscience.com/>

**MATRIX SCIENCE Mascot Search Results**

**Peptide View Spot no 82**

MS/MS Fragmentation of **GGLDFTKDDENVNSQPFMR**

Found in **gi|11466795** in **NCBIInr**, ribulose-1,5-bisphosphate carboxylase/oxygenase large subunit [Oryza sativa Japonica Group]

Match to Query 39: 2169.091824 from(2170.099100,1+) intensity(0.0000) index(22)

Title: Label: C11, Spot\_Id: 216639, Peak\_List\_Id: 221200, MSMS Job\_Run\_Id: 21345, Comment:

Data file C:\Documents and Settings\Administrator\Desktop\farah BHU\RAJESH\12-1-13 raj\ppw\_C11\_135997697400.txt

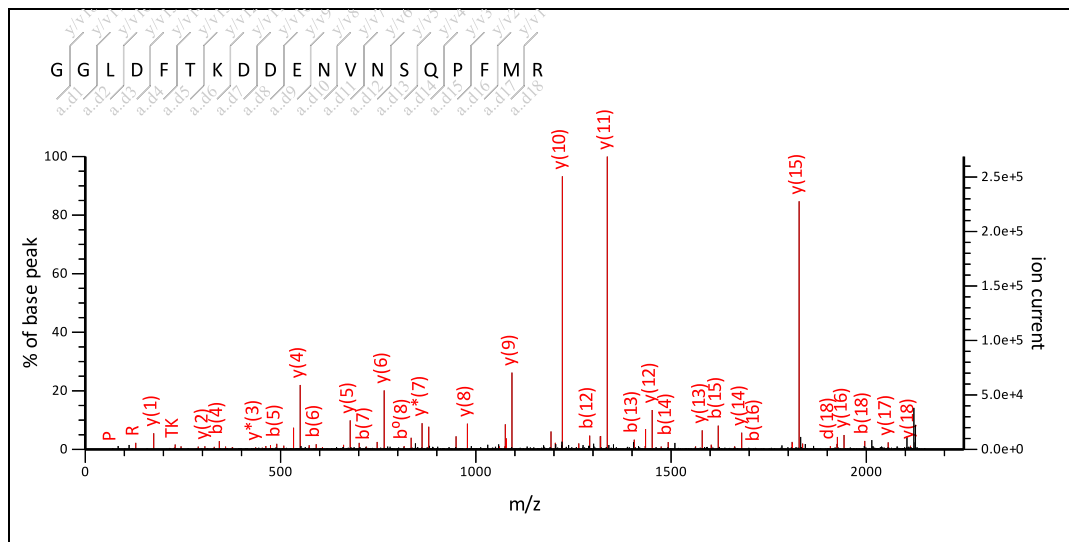

Navigation icons: Home, Back, Forward, Search, Print, etc. Range: 0 to 2249.63

Label all possible matches  Label matches used for scoring

Monoisotopic mass of neutral peptide Mr(calc): 2168.9797

Fixed modifications: Carbamidomethyl (C) (apply to specified residues or termini only)

Ions Score: 144 Expect: 2.3e-11

Matches : 87/340 fragment ions using 105 most intense peaks [\(help\)](#)

| #  | Immon.   | a         | a*        | a <sup>0</sup> | b         | b*        | b <sup>0</sup> | d         | d'       | Seq. | v         | w         | w'        | y         | y*        |
|----|----------|-----------|-----------|----------------|-----------|-----------|----------------|-----------|----------|------|-----------|-----------|-----------|-----------|-----------|
| 1  | 30.0338  | 30.0338   |           |                | 58.0287   |           |                | 44.0495   |          | G    |           |           |           |           |           |
| 2  | 30.0338  | 87.0553   |           |                | 115.0502  |           |                |           |          | G    |           |           |           | 2112.9655 | 2095.9389 |
| 3  | 86.0964  | 200.1394  |           |                | 228.1343  |           |                | 158.0924  |          | L    | 1997.8658 | 1996.8705 |           | 2055.9440 | 2038.9175 |
| 4  | 88.0393  | 315.1663  |           | 297.1557       | 343.1612  |           | 325.1506       | 271.1765  |          | D    | 1882.8388 | 1881.8436 |           | 1942.8600 | 1925.8334 |
| 5  | 120.0808 | 462.2347  |           | 444.2241       | 490.2296  |           | 472.2191       |           |          | F    | 1735.7704 |           |           | 1827.8330 | 1810.8065 |
| 6  | 74.0600  | 563.2824  |           | 545.2718       | 591.2773  |           | 573.2667       | 547.2875  | 549.2667 | T    | 1634.7227 | 1647.7431 | 1649.7224 | 1680.7646 | 1663.7381 |
| 7  | 101.1073 | 691.3774  | 674.3508  | 673.3668       | 719.3723  | 702.3457  | 701.3617       | 634.3195  |          | K    | 1506.6278 | 1505.6325 |           | 1579.7169 | 1562.6904 |
| 8  | 88.0393  | 806.4043  | 789.3777  | 788.3937       | 834.3992  | 817.3727  | 816.3886       | 762.4145  |          | D    | 1391.6008 | 1390.6056 |           | 1451.6220 | 1434.5954 |
| 9  | 88.0393  | 921.4312  | 904.4047  | 903.4207       | 949.4262  | 932.3996  | 931.4156       | 877.4414  |          | D    | 1276.5739 | 1275.5786 |           | 1336.5950 | 1319.5685 |
| 10 | 102.0550 | 1050.4738 | 1033.4473 | 1032.4633      | 1078.4687 | 1061.4422 | 1060.4582      | 992.4684  |          | E    | 1147.5313 | 1146.5361 |           | 1221.5681 | 1204.5415 |
| 11 | 87.0553  | 1164.5168 | 1147.4902 | 1146.5062      | 1192.5117 | 1175.4851 | 1174.5011      | 1121.5109 |          | N    | 1033.4884 | 1032.4931 |           | 1092.5255 | 1075.4989 |
| 12 | 72.0808  | 1263.5852 | 1246.5586 | 1245.5746      | 1291.5801 | 1274.5535 | 1273.5695      | 1249.5695 |          | V    | 934.4200  | 947.4404  |           | 978.4826  | 961.4560  |
| 13 | 87.0553  | 1377.6281 | 1360.6016 | 1359.6175      | 1405.6230 | 1388.5965 | 1387.6124      | 1334.6223 |          | N    | 820.3770  | 819.3818  |           | 879.4141  | 862.3876  |
| 14 | 60.0444  | 1464.6601 | 1447.6336 | 1446.6496      | 1492.6550 | 1475.6285 | 1474.6445      | 1448.6652 |          | S    | 733.3450  | 732.3498  |           | 765.3712  | 748.3447  |
| 15 | 101.0709 | 1592.7187 | 1575.6922 | 1574.7081      | 1620.7136 | 1603.6871 | 1602.7031      | 1535.6972 |          | Q    | 605.2864  | 604.2912  |           | 678.3392  | 661.3126  |
| 16 | 70.0651  | 1689.7715 | 1672.7449 | 1671.7609      | 1717.7664 | 1700.7398 | 1699.7558      | 1663.7558 |          | P    | 508.2337  | 507.2384  |           | 550.2806  | 533.2541  |
| 17 | 120.0808 | 1836.8399 | 1819.8133 | 1818.8293      | 1864.8348 | 1847.8082 | 1846.8242      |           |          | F    | 361.1653  |           |           | 453.2279  | 436.2013  |
| 18 | 104.0528 | 1967.8804 | 1950.8538 | 1949.8698      | 1995.8753 | 1978.8487 | 1977.8647      | 1907.8770 |          | M    | 230.1248  | 229.1295  |           | 306.1594  | 289.1329  |
| 19 | 129.1135 |           |           |                |           |           |                |           |          | R    | 74.0237   | 73.0284   |           | 175.1190  | 158.0924  |

| Seq   | ya       | yb       | Seq    | ya       | yb       | Seq  | ya       | yb       |
|-------|----------|----------|--------|----------|----------|------|----------|----------|
| GL    | 143.1179 | 171.1128 | GLD    | 258.1448 | 286.1397 | GLDF | 405.2132 | 433.2082 |
| GLDFT | 506.2609 | 534.2558 | GLDFTK | 634.3559 | 662.3508 | LD   | 201.1234 | 229.1183 |



|               |                 |                 |               |          |                 |               |          |                 |
|---------------|-----------------|-----------------|---------------|----------|-----------------|---------------|----------|-----------------|
| <b>LDLDF</b>  | 348.1918        | <b>376.1867</b> | <b>LDLDF</b>  | 449.2395 | 477.2344        | <b>LDLDF</b>  | 577.3344 | 605.3293        |
| <b>LDLDFK</b> | 692.3614        | 720.3563        | <b>DF</b>     | 235.1077 | 263.1026        | <b>DFT</b>    | 336.1554 | 364.1503        |
| <b>DFTK</b>   | 464.2504        | 492.2453        | <b>DFTKD</b>  | 579.2773 | <b>607.2722</b> | <b>DFTKDD</b> | 694.3042 | 722.2992        |
| <b>FT</b>     | 221.1285        | 249.1234        | <b>FTK</b>    | 349.2234 | <b>377.2183</b> | <b>FTKD</b>   | 464.2504 | 492.2453        |
| <b>FTKDD</b>  | 579.2773        | <b>607.2722</b> | <b>TK</b>     | 202.1550 | <b>230.1499</b> | <b>TKD</b>    | 317.1819 | 345.1769        |
| <b>TKDD</b>   | 432.2089        | 460.2038        | <b>TKDDE</b>  | 561.2515 | 589.2464        | <b>TKDDEN</b> | 675.2944 | 703.2893        |
| <b>KD</b>     | <b>216.1343</b> | 244.1292        | <b>KDD</b>    | 331.1612 | <b>359.1561</b> | <b>KDDE</b>   | 460.2038 | 488.1987        |
| <b>KDDEN</b>  | 574.2467        | 602.2416        | <b>KDDENV</b> | 673.3151 | 701.3101        | <b>DD</b>     | 203.0662 | 231.0612        |
| <b>DDE</b>    | 332.1088        | 360.1038        | <b>DDEN</b>   | 446.1518 | <b>474.1467</b> | <b>DDENV</b>  | 545.2202 | <b>573.2151</b> |
| <b>DDENVN</b> | 659.2631        | 687.2580        | <b>DE</b>     | 217.0819 | <b>245.0768</b> | <b>DEN</b>    | 331.1248 | <b>359.1197</b> |
| <b>DENV</b>   | 430.1932        | 458.1882        | <b>DENVN</b>  | 544.2362 | 572.2311        | <b>DENVNS</b> | 631.2682 | 659.2631        |
| <b>EN</b>     | <b>216.0979</b> | 244.0928        | <b>ENV</b>    | 315.1663 | <b>343.1612</b> | <b>ENVN</b>   | 429.2092 | 457.2041        |
| <b>ENVNS</b>  | 516.2413        | 544.2362        | <b>ENVNSQ</b> | 644.2998 | 672.2947        | <b>NV</b>     | 186.1237 | 214.1186        |
| <b>NVN</b>    | 300.1666        | 328.1615        | <b>NVNS</b>   | 387.1987 | 415.1936        | <b>NVNSQ</b>  | 515.2572 | 543.2522        |
| <b>NVNSQP</b> | 612.3100        | 640.3049        | <b>VN</b>     | 186.1237 | 214.1186        | <b>VNS</b>    | 273.1557 | 301.1506        |
| <b>VNSQ</b>   | 401.2143        | 429.2092        | <b>VNSQP</b>  | 498.2671 | 526.2620        | <b>VNSQPF</b> | 645.3355 | 673.3304        |
| <b>NS</b>     | 174.0873        | 202.0822        | <b>NSQ</b>    | 302.1459 | <b>330.1408</b> | <b>NSQP</b>   | 399.1987 | 427.1936        |
| <b>NSQPF</b>  | 546.2671        | 574.2620        | <b>NSQPFM</b> | 677.3076 | 705.3025        | <b>SQ</b>     | 188.1030 | <b>216.0979</b> |
| <b>SQP</b>    | 285.1557        | 313.1506        | <b>SQPF</b>   | 432.2241 | 460.2191        | <b>SQPFM</b>  | 563.2646 | <b>591.2595</b> |
| <b>QP</b>     | 198.1237        | 226.1186        | <b>QPF</b>    | 345.1921 | 373.1870        | <b>QPFM</b>   | 476.2326 | 504.2275        |
| <b>PF</b>     | 217.1335        | <b>245.1285</b> | <b>PFM</b>    | 348.1740 | <b>376.1689</b> | <b>FM</b>     | 251.1213 | 279.1162        |

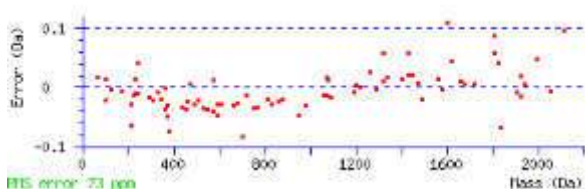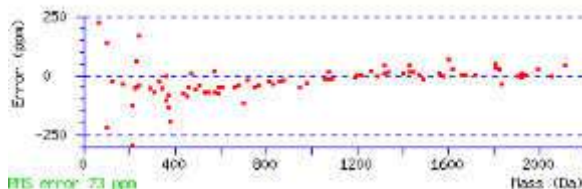

NCBI BLAST search of [GGLDFTKDDENVNSQPFMR](#)  
 (Parameters: blastp, nr protein database, expect=20000, no filter, PAM30)  
 Other BLAST [web gateways](#)

All matches to this query

| Score | Mr(calc)  | Delta  | Sequence                            |
|-------|-----------|--------|-------------------------------------|
| 144.9 | 2168.4877 | 0.6041 | <a href="#">GGLDFTKDBENVNSQPFMR</a> |
| 143.5 | 2168.9797 | 0.1121 | <a href="#">GGIDFTKDDENVNSQPFMR</a> |
| 143.5 | 2168.9797 | 0.1121 | <a href="#">GGIDFTKDDENVNSQPFMR</a> |
| 143.5 | 2169.0161 | 0.0758 | <a href="#">GGLDFTKDDENVNSKPFMR</a> |
| 143.5 | 2168.9797 | 0.1121 | <a href="#">GGLDFTKDDENVNSQPFMR</a> |
| 143.5 | 2168.9797 | 0.1121 | <a href="#">GGLDFTKDDENVNSQPFMR</a> |
| 143.5 | 2168.9797 | 0.1121 | <a href="#">GGLDFTKDDENVNSQPFMR</a> |
| 143.5 | 2168.9797 | 0.1121 | <a href="#">GGLDFTKDDENVNSQPFMR</a> |
| 143.5 | 2168.9797 | 0.1121 | <a href="#">GGLDFTKDDENVNSQPFMR</a> |
| 143.5 | 2168.9797 | 0.1121 | <a href="#">GGLDFTKDDENVNSQPFMR</a> |
| 143.5 | 2168.9797 | 0.1121 | <a href="#">GGLDFTKDDENVNSQPFMR</a> |

Mascot: <http://www.matrixscience.com/>



**MATRIX SCIENCE Mascot Search Results**

**Peptide View Spot no 82**

MS/MS Fragmentation of **GGLDFTKDDENVNSQPFMR**

Found in **gi|11466795** in **NCBI**nr, ribulose-1,5-bisphosphate carboxylase/oxygenase large subunit [Oryza sativa Japonica Group]

Match to Query 41: 2185.077224 from(2186.084500,1+) intensity(0.0000) index(23)

Title: Label: C11, Spot\_Id: 216639, Peak\_List\_Id: 221210, MSMS Job\_Run\_Id: 21345, Comment:

Data file C:\Documents and Settings\Administrator\Desktop\farah BHU\RAJESH\12-1-13 raj\ppw\_C11\_135997697400.txt

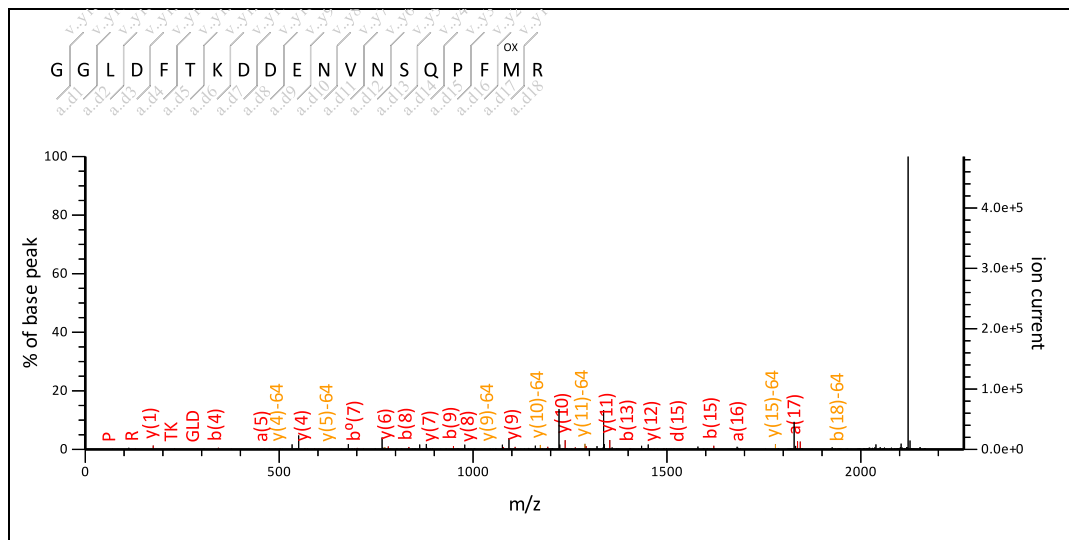

Navigation icons: Home, Back, Forward, Search, etc. Range: 0 to 2265.68

Label all possible matches  Label matches used for scoring

Monoisotopic mass of neutral peptide Mr(calc): 2184.9746  
 Fixed modifications: Carbamidomethyl (C) (apply to specified residues or termini only)  
 Variable modifications:  
 M18 : Oxidation (M), with neutral losses 63.9983(shown in table), 0.0000  
 Ions Score: 42 Expect: 0.28  
 Matches : 94/434 fragment ions using 175 most intense peaks ([help](#))

| #  | Immon.   | a         | a*        | a <sup>0</sup> | b         | b*        | b <sup>0</sup> | d         | d'       | Seq. | v         | w         | w'        | y         | y*        |
|----|----------|-----------|-----------|----------------|-----------|-----------|----------------|-----------|----------|------|-----------|-----------|-----------|-----------|-----------|
| 1  | 30.0338  | 30.0338   |           |                | 58.0287   |           |                | 44.0495   |          | G    |           |           |           |           |           |
| 2  | 30.0338  | 87.0553   |           |                | 115.0502  |           |                |           |          | G    |           |           |           | 2064.9621 | 2047.9356 |
| 3  | 86.0964  | 200.1394  |           |                | 228.1343  |           |                | 158.0924  |          | L    | 1949.8624 | 1948.8672 |           | 2007.9407 | 1990.9141 |
| 4  | 88.0393  | 315.1663  |           | 297.1557       | 343.1612  |           | 325.1506       | 271.1765  |          | D    | 1834.8355 | 1833.8402 |           | 1894.8566 | 1877.8300 |
| 5  | 120.0808 | 462.2347  |           | 444.2241       | 490.2296  |           | 472.2191       |           |          | F    | 1687.7671 |           |           | 1779.8297 | 1762.8031 |
| 6  | 74.0600  | 563.2824  |           | 545.2718       | 591.2773  |           | 573.2667       | 547.2875  | 549.2667 | T    | 1586.7194 | 1599.7398 | 1601.7190 | 1632.7612 | 1615.7347 |
| 7  | 101.1073 | 691.3774  | 674.3508  | 673.3668       | 719.3723  | 702.3457  | 701.3617       | 634.3195  |          | K    | 1458.6244 | 1457.6292 |           | 1531.7136 | 1514.6870 |
| 8  | 88.0393  | 806.4043  | 789.3777  | 788.3937       | 834.3992  | 817.3727  | 816.3886       | 762.4145  |          | D    | 1343.5975 | 1342.6022 |           | 1403.6186 | 1386.5920 |
| 9  | 88.0393  | 921.4312  | 904.4047  | 903.4207       | 949.4262  | 932.3996  | 931.4156       | 877.4414  |          | D    | 1228.5705 | 1227.5753 |           | 1288.5917 | 1271.5651 |
| 10 | 102.0550 | 1050.4738 | 1033.4473 | 1032.4633      | 1078.4687 | 1061.4422 | 1060.4582      | 992.4684  |          | E    | 1099.5279 | 1098.5327 |           | 1173.5647 | 1156.5382 |
| 11 | 87.0553  | 1164.5168 | 1147.4902 | 1146.5062      | 1192.5117 | 1175.4851 | 1174.5011      | 1121.5109 |          | N    | 985.4850  | 984.4898  |           | 1044.5221 | 1027.4956 |
| 12 | 72.0808  | 1263.5852 | 1246.5586 | 1245.5746      | 1291.5801 | 1274.5535 | 1273.5695      | 1249.5695 |          | V    | 886.4166  | 899.4370  |           | 930.4792  | 913.4526  |
| 13 | 87.0553  | 1377.6281 | 1360.6016 | 1359.6175      | 1405.6230 | 1388.5965 | 1387.6124      | 1334.6223 |          | N    | 772.3737  | 771.3784  |           | 831.4108  | 814.3842  |
| 14 | 60.0444  | 1464.6601 | 1447.6336 | 1446.6496      | 1492.6550 | 1475.6285 | 1474.6445      | 1448.6652 |          | S    | 685.3416  | 684.3464  |           | 717.3679  | 700.3413  |
| 15 | 101.0709 | 1592.7187 | 1575.6922 | 1574.7081      | 1620.7136 | 1603.6871 | 1602.7031      | 1535.6972 |          | Q    | 557.2831  | 556.2878  |           | 630.3358  | 613.3093  |
| 16 | 70.0651  | 1689.7715 | 1672.7449 | 1671.7609      | 1717.7664 | 1700.7398 | 1699.7558      | 1663.7558 |          | P    | 460.2303  | 459.2350  |           | 502.2772  | 485.2507  |
| 17 | 120.0808 | 1836.8399 | 1819.8133 | 1818.8293      | 1864.8348 | 1847.8082 | 1846.8242      |           |          | F    | 313.1619  |           |           | 405.2245  | 388.1979  |
| 18 | 56.0495  | 1919.8770 | 1902.8504 | 1901.8664      | 1947.8719 | 1930.8454 | 1929.8613      | 1907.8770 |          | M    | 230.1248  | 229.1295  |           | 258.1561  | 241.1295  |
| 19 | 129.1135 |           |           |                |           |           |                |           |          | R    | 74.0237   | 73.0284   |           | 175.1190  | 158.0924  |

| Seq | ya       | yb       | Seq | ya       | yb       | Seq  | ya       | yb       |
|-----|----------|----------|-----|----------|----------|------|----------|----------|
| GL  | 143.1179 | 171.1128 | GLD | 258.1448 | 286.1397 | GLDF | 405.2132 | 433.2082 |

|               |                 |                 |               |                 |                 |               |                 |                 |
|---------------|-----------------|-----------------|---------------|-----------------|-----------------|---------------|-----------------|-----------------|
| <b>GLDFT</b>  | 506.2609        | 534.2558        | <b>GLDFTK</b> | 634.3559        | 662.3508        | <b>LD</b>     | 201.1234        | 229.1183        |
| <b>LDF</b>    | 348.1918        | <b>376.1867</b> | <b>LDFT</b>   | 449.2395        | 477.2344        | <b>LDFTK</b>  | 577.3344        | 605.3293        |
| <b>LDFTKD</b> | 692.3614        | 720.3563        | <b>DF</b>     | 235.1077        | 263.1026        | <b>DFT</b>    | 336.1554        | <b>364.1503</b> |
| <b>DFTK</b>   | 464.2504        | 492.2453        | <b>DFTKD</b>  | 579.2773        | 607.2722        | <b>DFTKDD</b> | <b>694.3042</b> | 722.2992        |
| <b>FT</b>     | 221.1285        | 249.1234        | <b>FTK</b>    | 349.2234        | <b>377.2183</b> | <b>FTKD</b>   | 464.2504        | 492.2453        |
| <b>FTKDD</b>  | 579.2773        | 607.2722        | <b>TK</b>     | 202.1550        | <b>230.1499</b> | <b>TKD</b>    | 317.1819        | <b>345.1769</b> |
| <b>TKDD</b>   | 432.2089        | 460.2038        | <b>TKDDE</b>  | 561.2515        | <b>589.2464</b> | <b>TKDDEN</b> | 675.2944        | 703.2893        |
| <b>KD</b>     | <b>216.1343</b> | <b>244.1292</b> | <b>KDD</b>    | 331.1612        | <b>359.1561</b> | <b>KDDE</b>   | 460.2038        | 488.1987        |
| <b>KDDEN</b>  | 574.2467        | <b>602.2416</b> | <b>KDDENV</b> | 673.3151        | 701.3101        | <b>DD</b>     | 203.0662        | 231.0612        |
| <b>DDE</b>    | 332.1088        | 360.1038        | <b>DDEN</b>   | 446.1518        | <b>474.1467</b> | <b>DDENV</b>  | 545.2202        | <b>573.2151</b> |
| <b>DDENVN</b> | 659.2631        | 687.2580        | <b>DE</b>     | <b>217.0819</b> | <b>245.0768</b> | <b>DEN</b>    | 331.1248        | <b>359.1197</b> |
| <b>DENV</b>   | 430.1932        | 458.1882        | <b>DENVN</b>  | 544.2362        | 572.2311        | <b>DENVNS</b> | 631.2682        | 659.2631        |
| <b>EN</b>     | <b>216.0979</b> | <b>244.0928</b> | <b>ENV</b>    | 315.1663        | <b>343.1612</b> | <b>ENVN</b>   | 429.2092        | <b>457.2041</b> |
| <b>ENVNS</b>  | 516.2413        | 544.2362        | <b>ENVNSQ</b> | 644.2998        | 672.2947        | <b>NV</b>     | <b>186.1237</b> | 214.1186        |
| <b>NVN</b>    | 300.1666        | 328.1615        | <b>NVNS</b>   | 387.1987        | 415.1936        | <b>NVNSQ</b>  | 515.2572        | 543.2522        |
| <b>NVNSQP</b> | 612.3100        | 640.3049        | <b>VN</b>     | <b>186.1237</b> | 214.1186        | <b>VNS</b>    | 273.1557        | 301.1506        |
| <b>VNSQ</b>   | 401.2143        | 429.2092        | <b>VNSQP</b>  | 498.2671        | 526.2620        | <b>VNSQPF</b> | 645.3355        | 673.3304        |
| <b>NS</b>     | 174.0873        | 202.0822        | <b>NSQ</b>    | 302.1459        | <b>330.1408</b> | <b>NSQP</b>   | 399.1987        | 427.1936        |
| <b>NSQPF</b>  | 546.2671        | 574.2620        | <b>NSQPFM</b> | 629.3042        | 657.2991        | <b>SQ</b>     | 188.1030        | <b>216.0979</b> |
| <b>SQP</b>    | 285.1557        | 313.1506        | <b>SQPF</b>   | 432.2241        | 460.2191        | <b>SQPFM</b>  | 515.2613        | 543.2562        |
| <b>QP</b>     | 198.1237        | 226.1186        | <b>QPF</b>    | <b>345.1921</b> | 373.1870        | <b>QPFM</b>   | 428.2292        | 456.2241        |
| <b>PF</b>     | <b>217.1335</b> | <b>245.1285</b> | <b>PFM</b>    | 300.1707        | 328.1656        | <b>FM</b>     | 203.1179        | 231.1128        |

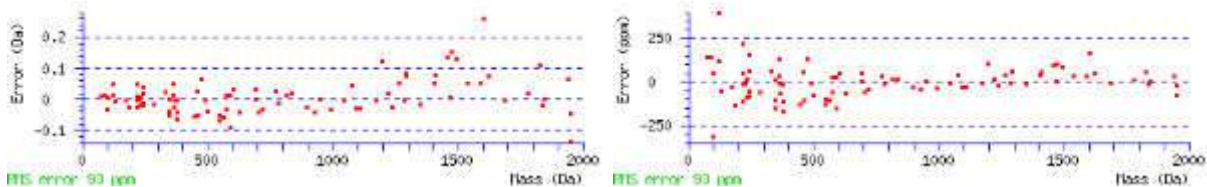

NCBI **BLAST** search of [GGLDFTKDDENVNSQPFMR](#)  
 (Parameters: blastp, nr protein database, expect=20000, no filter, PAM30)  
 Other BLAST [web gateways](#)

All matches to this query

| Score | Mr(calc)  | Delta  | Sequence                            |
|-------|-----------|--------|-------------------------------------|
| 93.7  | 2184.9382 | 0.1390 | <a href="#">GGEDETKDDENVNSQPFMR</a> |
| 93.7  | 2183.9542 | 1.1230 | <a href="#">GGQDFTKDDENVNSQPFMR</a> |
| 91.4  | 2184.9932 | 0.0840 | <a href="#">GGLMFTKDDENVNSQPFMR</a> |
| 75.7  | 2184.9746 | 0.1026 | <a href="#">GGLDYTKDDENVNSQPFMR</a> |
| 59.2  | 2184.9932 | 0.0840 | <a href="#">GGLDFTKMDENVNSQPFMR</a> |
| 49.7  | 2184.9932 | 0.0840 | <a href="#">GGLDFTKDMENVNSQPFMR</a> |
| 42.5  | 2184.9746 | 0.1026 | <a href="#">GGIDFTKDDENVNSQPFMR</a> |
| 42.5  | 2184.9746 | 0.1026 | <a href="#">GGIDFTKDDENVNSQPFMR</a> |
| 42.5  | 2185.0110 | 0.0662 | <a href="#">GGLDFTKDDENVNSKPFMR</a> |
| 42.5  | 2184.9746 | 0.1026 | <a href="#">GGLDFTKDDENVNSQPFMR</a> |

Mascot: <http://www.matrixscience.com/>

**MATRIX SCIENCE Mascot Search Results**

**Peptide View**

MS/MS Fragmentation of **LTYYP EYETK DTDILA AFR**

Found in **gi|11466795** in **NCBI**nr, ribulose-1,5-bisphosphate carboxylase/oxygenase large subunit [Oryza sativa Japonica Group]

Match to Query 46: 2409.289324 from(2410.296600,1+) intensity(0.0000) index(26)

Title: Label: C11, Spot\_Id: 216639, Peak\_List\_Id: 221199, MSMS Job\_Run\_Id: 21345, Comment:

Data file C:\Documents and Settings\Administrator\Desktop\farah BHU\RAJESH\12-1-13 raj\ppw\_C11\_135997697400.txt

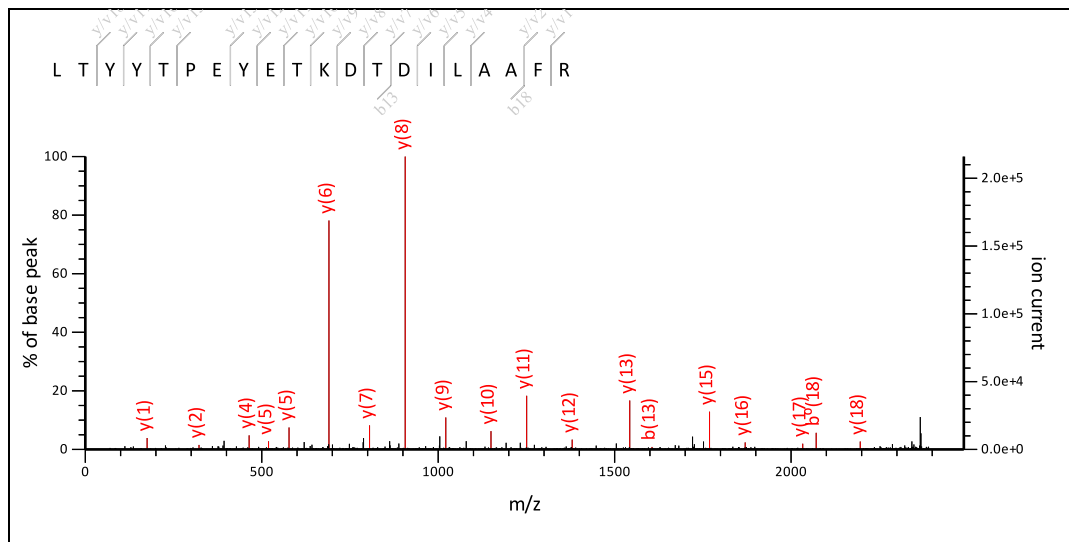

Navigation icons: Home, Back, Forward, Search, Print, etc. Range: 0 to 2489.58

Label all possible matches  Label matches used for scoring

Monoisotopic mass of neutral peptide Mr(calc): 2409.1740

Fixed modifications: Carbamidomethyl (C) (apply to specified residues or termini only)

Ions Score: 143 Expect: 1.8e-11

Matches : 21/356 fragment ions using 24 most intense peaks [\(help\)](#)

| #  | Immon.   | a         | a*        | a <sup>0</sup> | b         | b*        | b <sup>0</sup> | d         | d'        | Seq. | v         | w         | w'        | y         | y*        |
|----|----------|-----------|-----------|----------------|-----------|-----------|----------------|-----------|-----------|------|-----------|-----------|-----------|-----------|-----------|
| 1  | 86.0964  | 86.0964   |           |                | 114.0913  |           |                | 44.0495   |           | L    |           |           |           |           |           |
| 2  | 74.0600  | 187.1441  |           | 169.1335       | 215.1390  |           | 197.1285       | 171.1492  | 173.1285  | T    | 2251.0554 | 2264.0758 | 2266.0550 | 2297.0972 | 2280.0707 |
| 3  | 136.0757 | 350.2074  |           | 332.1969       | 378.2023  |           | 360.1918       |           |           | Y    | 2087.9920 |           |           | 2196.0495 | 2179.0230 |
| 4  | 136.0757 | 513.2708  |           | 495.2602       | 541.2657  |           | 523.2551       |           |           | Y    | 1924.9287 |           |           | 2032.9862 | 2015.9597 |
| 5  | 74.0600  | 614.3184  |           | 596.3079       | 642.3134  |           | 624.3028       | 598.3235  | 600.3028  | T    | 1823.8810 | 1836.9014 | 1838.8807 | 1869.9229 | 1852.8963 |
| 6  | 70.0651  | 711.3712  |           | 693.3606       | 739.3661  |           | 721.3556       | 685.3556  |           | P    | 1726.8283 | 1725.8330 |           | 1768.8752 | 1751.8487 |
| 7  | 102.0550 | 840.4138  |           | 822.4032       | 868.4087  |           | 850.3981       | 782.4083  |           | E    | 1597.7857 | 1596.7904 |           | 1671.8224 | 1654.7959 |
| 8  | 136.0757 | 1003.4771 |           | 985.4666       | 1031.4720 |           | 1013.4615      |           |           | Y    | 1434.7223 |           |           | 1542.7799 | 1525.7533 |
| 9  | 102.0550 | 1132.5197 |           | 1114.5092      | 1160.5146 |           | 1142.5041      | 1074.5142 |           | E    | 1305.6797 | 1304.6845 |           | 1379.7165 | 1362.6900 |
| 10 | 74.0600  | 1233.5674 |           | 1215.5568      | 1261.5623 |           | 1243.5517      | 1217.5725 | 1219.5517 | T    | 1204.6321 | 1217.6525 | 1219.6317 | 1250.6739 | 1233.6474 |
| 11 | 101.1073 | 1361.6624 | 1344.6358 | 1343.6518      | 1389.6573 | 1372.6307 | 1371.6467      | 1304.6045 |           | K    | 1076.5371 | 1075.5419 |           | 1149.6262 | 1132.5997 |
| 12 | 88.0393  | 1476.6893 | 1459.6628 | 1458.6787      | 1504.6842 | 1487.6577 | 1486.6737      | 1432.6995 |           | D    | 961.5102  | 960.5149  |           | 1021.5313 | 1004.5047 |
| 13 | 74.0600  | 1577.7370 | 1560.7104 | 1559.7264      | 1605.7319 | 1588.7054 | 1587.7213      | 1561.7421 | 1563.7213 | T    | 860.4625  | 873.4829  | 875.4621  | 906.5043  | 889.4778  |
| 14 | 88.0393  | 1692.7639 | 1675.7374 | 1674.7534      | 1720.7588 | 1703.7323 | 1702.7483      | 1648.7741 |           | D    | 745.4355  | 744.4403  |           | 805.4567  | 788.4301  |
| 15 | 86.0964  | 1805.8480 | 1788.8214 | 1787.8374      | 1833.8429 | 1816.8164 | 1815.8323      | 1777.8167 | 1791.8323 | I    | 632.3515  | 645.3719  | 659.3875  | 690.4297  | 673.4032  |
| 16 | 86.0964  | 1918.9321 | 1901.9055 | 1900.9215      | 1946.9270 | 1929.9004 | 1928.9164      | 1876.8851 |           | L    | 519.2674  | 518.2722  |           | 577.3457  | 560.3191  |
| 17 | 44.0495  | 1989.9692 | 1972.9426 | 1971.9586      | 2017.9641 | 2000.9375 | 1999.9535      |           |           | A    | 448.2303  |           |           | 464.2616  | 447.2350  |
| 18 | 44.0495  | 2061.0063 | 2043.9797 | 2042.9957      | 2089.0012 | 2071.9746 | 2070.9906      |           |           | A    | 377.1932  |           |           | 393.2245  | 376.1979  |
| 19 | 120.0808 | 2208.0747 | 2191.0481 | 2190.0641      | 2236.0696 | 2219.0431 | 2218.0590      |           |           | F    | 230.1248  |           |           | 322.1874  | 305.1608  |
| 20 | 129.1135 |           |           |                |           |           |                |           |           | R    | 74.0237   | 73.0284   |           | 175.1190  | 158.0924  |

| Seq | ya       | yb       | Seq | ya       | yb       | Seq | ya       | yb       |
|-----|----------|----------|-----|----------|----------|-----|----------|----------|
| TY  | 237.1234 | 265.1183 | TYT | 400.1867 | 428.1816 | TYT | 501.2344 | 529.2293 |

|                        |          |          |                         |          |          |                        |          |          |
|------------------------|----------|----------|-------------------------|----------|----------|------------------------|----------|----------|
| <a href="#">TYYP</a>   | 598.2871 | 626.2821 | <a href="#">YY</a>      | 299.1390 | 327.1339 | <a href="#">YYT</a>    | 400.1867 | 428.1816 |
| <a href="#">YYTP</a>   | 497.2395 | 525.2344 | <a href="#">YYTPE</a>   | 626.2821 | 654.2770 | <a href="#">YT</a>     | 237.1234 | 265.1183 |
| <a href="#">YTP</a>    | 334.1761 | 362.1710 | <a href="#">YTPE</a>    | 463.2187 | 491.2136 | <a href="#">YTPEY</a>  | 626.2821 | 654.2770 |
| <a href="#">TP</a>     | 171.1128 | 199.1077 | <a href="#">TPE</a>     | 300.1554 | 328.1503 | <a href="#">TPEY</a>   | 463.2187 | 491.2136 |
| <a href="#">TPEYE</a>  | 592.2613 | 620.2562 | <a href="#">TPEYET</a>  | 693.3090 | 721.3039 | <a href="#">PE</a>     | 199.1077 | 227.1026 |
| <a href="#">PEY</a>    | 362.1710 | 390.1660 | <a href="#">PEYE</a>    | 491.2136 | 519.2086 | <a href="#">PEYET</a>  | 592.2613 | 620.2562 |
| <a href="#">EY</a>     | 265.1183 | 293.1132 | <a href="#">EYE</a>     | 394.1609 | 422.1558 | <a href="#">EYET</a>   | 495.2086 | 523.2035 |
| <a href="#">EYETK</a>  | 623.3035 | 651.2984 | <a href="#">YE</a>      | 265.1183 | 293.1132 | <a href="#">YET</a>    | 366.1660 | 394.1609 |
| <a href="#">YETK</a>   | 494.2609 | 522.2558 | <a href="#">YETKD</a>   | 609.2879 | 637.2828 | <a href="#">ET</a>     | 203.1026 | 231.0975 |
| <a href="#">ETK</a>    | 331.1976 | 359.1925 | <a href="#">ETKD</a>    | 446.2245 | 474.2195 | <a href="#">ETKDT</a>  | 547.2722 | 575.2671 |
| <a href="#">ETKDTD</a> | 662.2992 | 690.2941 | <a href="#">TK</a>      | 202.1550 | 230.1499 | <a href="#">TKD</a>    | 317.1819 | 345.1769 |
| <a href="#">TKDT</a>   | 418.2296 | 446.2245 | <a href="#">TKDTD</a>   | 533.2566 | 561.2515 | <a href="#">TKDTDI</a> | 646.3406 | 674.3355 |
| <a href="#">KD</a>     | 216.1343 | 244.1292 | <a href="#">KDT</a>     | 317.1819 | 345.1769 | <a href="#">KDTD</a>   | 432.2089 | 460.2038 |
| <a href="#">KDTD</a>   | 432.2089 | 460.2038 | <a href="#">KDTD</a>    | 432.2089 | 460.2038 | <a href="#">KDTD</a>   | 432.2089 | 460.2038 |
| <a href="#">KDTDI</a>  | 545.2930 | 573.2879 | <a href="#">KDTDIL</a>  | 658.3770 | 686.3719 | <a href="#">DT</a>     | 189.0870 | 217.0819 |
| <a href="#">DTD</a>    | 304.1139 | 332.1088 | <a href="#">DTD</a>     | 304.1139 | 332.1088 | <a href="#">DTDIL</a>  | 530.2821 | 558.2770 |
| <a href="#">DTDILA</a> | 601.3192 | 629.3141 | <a href="#">DTDILAA</a> | 672.3563 | 700.3512 | <a href="#">TD</a>     | 189.0870 | 217.0819 |
| <a href="#">TDI</a>    | 302.1710 | 330.1660 | <a href="#">TDIL</a>    | 415.2551 | 443.2500 | <a href="#">TDILA</a>  | 486.2922 | 514.2871 |
| <a href="#">TDILAA</a> | 557.3293 | 585.3243 | <a href="#">DI</a>      | 201.1234 | 229.1183 | <a href="#">DIL</a>    | 314.2074 | 342.2023 |
| <a href="#">DILA</a>   | 385.2445 | 413.2395 | <a href="#">DILAA</a>   | 456.2817 | 484.2766 | <a href="#">DILAAF</a> | 603.3501 | 631.3450 |
| <a href="#">IL</a>     | 199.1805 | 227.1754 | <a href="#">ILA</a>     | 270.2176 | 298.2125 | <a href="#">ILAA</a>   | 341.2547 | 369.2496 |
| <a href="#">ILAAF</a>  | 488.3231 | 516.3180 | <a href="#">LA</a>      | 157.1335 | 185.1285 | <a href="#">LAA</a>    | 228.1707 | 256.1656 |
| <a href="#">LAAF</a>   | 375.2391 | 403.2340 | <a href="#">AA</a>      | 115.0866 | 143.0815 | <a href="#">AAF</a>    | 262.1550 | 290.1499 |
| <a href="#">AF</a>     | 191.1179 | 219.1128 |                         |          |          |                        |          |          |

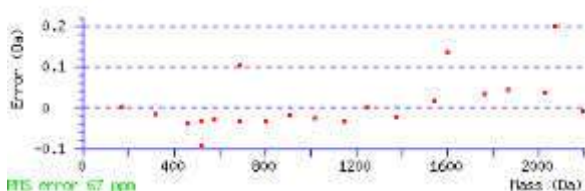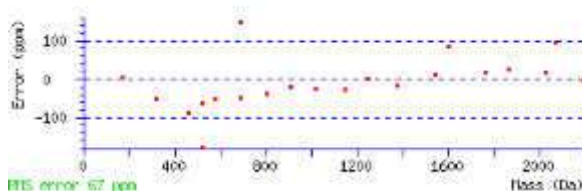

NCBI BLAST search of [LTYYPTEYETKDTDILAAFR](#)  
 (Parameters: blastp, nr protein database, expect=20000, no filter, PAM30)  
 Other BLAST [web gateways](#)

All matches to this query

| Score | Mr(calc)  | Delta  | Sequence                             |
|-------|-----------|--------|--------------------------------------|
| 142.9 | 2408.6820 | 0.6073 | <a href="#">LTYYPTEYETKDTBILAAFR</a> |
| 142.9 | 2409.1740 | 0.1153 | <a href="#">LTYYPTEYETKDTDILAAFR</a> |
| 142.9 | 2409.1740 | 0.1153 | <a href="#">LTYYPTEYETKDTDILAAFR</a> |
| 142.9 | 2408.6820 | 0.6073 | <a href="#">LTYYPTEYETKDTBILAAFR</a> |
| 142.9 | 2409.1740 | 0.1153 | <a href="#">LTYYPTEYETKDTDILAAFR</a> |
| 142.9 | 2409.1740 | 0.1153 | <a href="#">LTYYPTEYETKDTDILAAFR</a> |
| 142.9 | 2409.1740 | 0.1153 | <a href="#">LTYYPTEYETKDTDILAAFR</a> |
| 142.9 | 2409.1740 | 0.1153 | <a href="#">LTYYPTEYETKDTDILAAFR</a> |
| 142.9 | 2409.1740 | 0.1153 | <a href="#">LTYYPTEYETKDTDILAAFR</a> |
| 142.9 | 2409.1740 | 0.1153 | <a href="#">LTYYPTEYETKDTDILAAFR</a> |
| 142.9 | 2409.1740 | 0.1153 | <a href="#">LTYYPTEYETKDTDILAAFR</a> |
| 142.9 | 2409.1740 | 0.1153 | <a href="#">LTYYPTEYETKDTDILAAFR</a> |
| 142.9 | 2409.1740 | 0.1153 | <a href="#">LTYYPTEYETKDTDILAAFR</a> |
| 142.9 | 2409.1740 | 0.1153 | <a href="#">LTYYPTEYETKDTDILAAFR</a> |
| 142.9 | 2409.1740 | 0.1153 | <a href="#">LTYYPTEYETKDTDILAAFR</a> |

Mascot: <http://www.matrixscience.com/>



# Mascot Search Results

## Peptide View **Spot no 84**

MS/MS Fragmentation of **FRAPVEPY**

Found in **gi|780372** in **NCBIInr**, enolase [Oryza sativa Japonica Group]

Match to Query 18: 977.573844 from(978.581120,1+) intensity(0.0000) index(5)

Title: Label: J6, Spot\_Id: 228931, Peak\_List\_Id: 257585, MSMS Job\_Run\_Id: 24927, Comment:

Data file ppw\_J6\_138985135600.txt

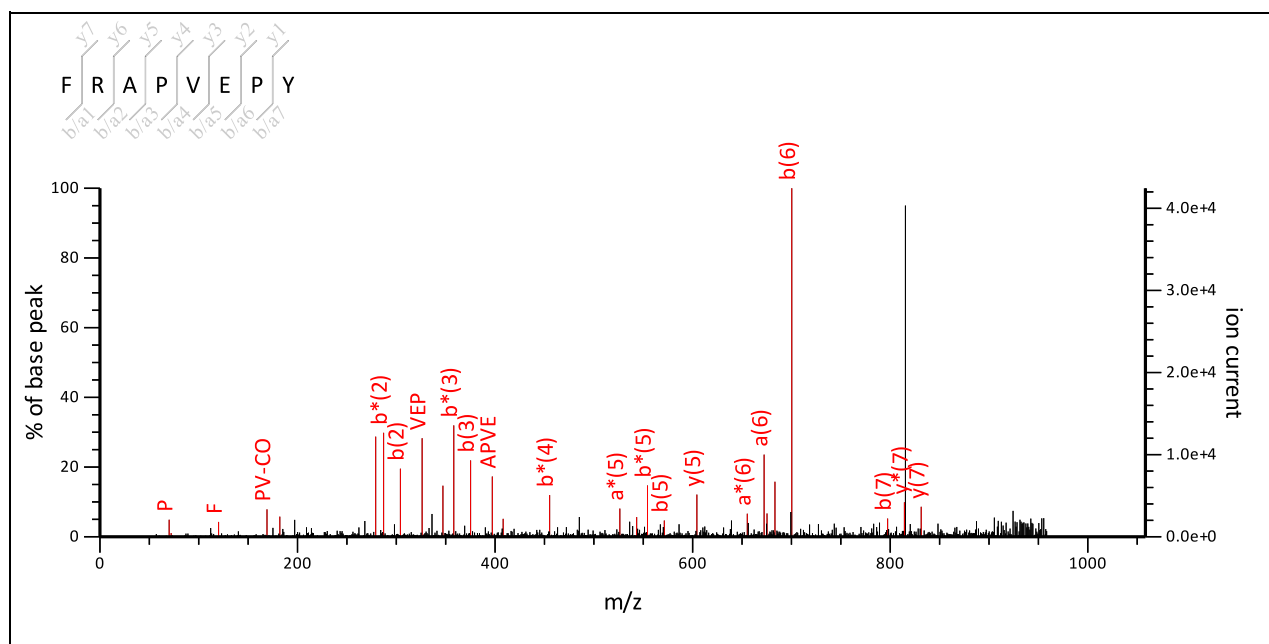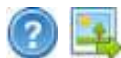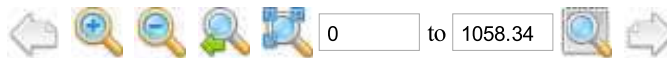

Label all possible matches  Label matches used for scoring

**Monoisotopic mass of neutral peptide Mr(calc):** 977.4971

**Fixed modifications:** Carbamidomethyl (C) (apply to specified residues or termini only)

**Ions Score:** 38 **Expect:** 0.4

**Matches:** 33/100 fragment ions using 47 most intense peaks ([help](#))

| # | Immon.   | a        | a*       | a <sup>0</sup> | b        | b*       | b <sup>0</sup> | d        | Seq. | v        | w        | y        | y*       | y <sup>0</sup> | # |
|---|----------|----------|----------|----------------|----------|----------|----------------|----------|------|----------|----------|----------|----------|----------------|---|
| 1 | 120.0808 | 120.0808 |          |                | 148.0757 |          |                | 44.0495  | F    |          |          |          |          |                | 8 |
| 2 | 129.1135 | 276.1819 | 259.1553 |                | 304.1768 | 287.1503 |                | 191.1179 | R    | 730.3406 | 729.3454 | 831.4359 | 814.4094 | 813.4254       | 7 |
| 3 | 44.0495  | 347.2190 | 330.1925 |                | 375.2139 | 358.1874 |                |          | A    | 659.3035 |          | 675.3348 |          | 657.3243       | 6 |
| 4 | 70.0651  | 444.2718 | 427.2452 |                | 472.2667 | 455.2401 |                | 418.2561 | P    | 562.2508 | 561.2555 | 604.2977 |          | 586.2871       | 5 |
| 5 | 72.0808  | 543.3402 | 526.3136 |                | 571.3351 | 554.3085 |                | 529.3245 | V    | 463.1823 | 476.2027 | 507.2449 |          | 489.2344       | 4 |
| 6 | 102.0550 | 672.3828 | 655.3562 | 654.3722       | 700.3777 | 683.3511 | 682.3671       | 614.3773 | E    | 334.1397 | 333.1445 | 408.1765 |          | 390.1660       | 3 |
| 7 | 70.0651  | 769.4355 | 752.4090 | 751.4250       | 797.4305 | 780.4039 | 779.4199       | 743.4199 | P    | 237.0870 | 236.0917 | 279.1339 |          |                | 2 |
| 8 | 136.0757 |          |          |                |          |          |                |          | Y    | 74.0237  | 73.0284  | 182.0812 |          |                | 1 |

| Seq   | ya       | yb       | Seq    | ya       | yb       | Seq   | ya       | yb       |
|-------|----------|----------|--------|----------|----------|-------|----------|----------|
| RA    | 200.1506 | 228.1455 | RAP    | 297.2034 | 325.1983 | RAPV  | 396.2718 | 424.2667 |
| RAPVE | 525.3144 | 553.3093 | RAPVEP | 622.3671 | 650.3620 | AP    | 141.1022 | 169.0972 |
| APV   | 240.1707 | 268.1656 | APVE   | 369.2132 | 397.2082 | APVEP | 466.2660 | 494.2609 |

|           |          |          |            |          |          |             |          |          |
|-----------|----------|----------|------------|----------|----------|-------------|----------|----------|
| <b>PV</b> | 169.1335 | 197.1285 | <b>PVE</b> | 298.1761 | 326.1710 | <b>PVEP</b> | 395.2289 | 423.2238 |
| <b>VE</b> | 201.1234 | 229.1183 | <b>VEP</b> | 298.1761 | 326.1710 | <b>EP</b>   | 199.1077 | 227.1026 |

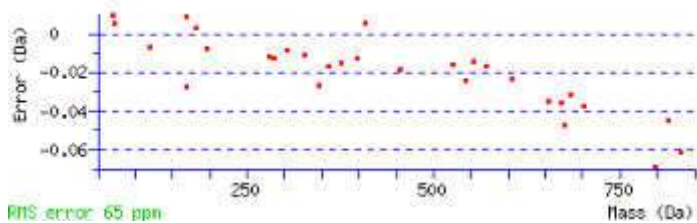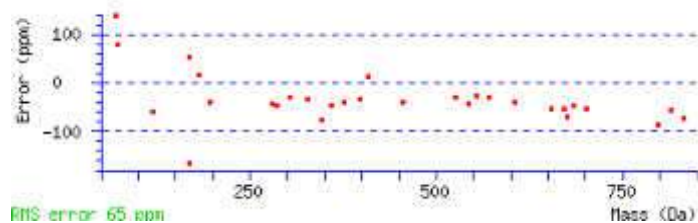

NCBI **BLAST** search of [FRAPVEPY](#)

(Parameters: blastp, nr protein database, expect=20000, no filter, PAM30)

Other BLAST [web gateways](#)

#### All matches to this query

| Score | Mr(calc) | Delta  | Sequence                  |
|-------|----------|--------|---------------------------|
| 37.8  | 977.4971 | 0.0768 | <a href="#">FRAPVEPY</a>  |
| 21.6  | 977.5004 | 0.0734 | <a href="#">FMPEVISR</a>  |
| 16.6  | 977.5334 | 0.0404 | <a href="#">YFPVLSR</a>   |
| 15.5  | 977.5182 | 0.0557 | <a href="#">NATAFVLDK</a> |
| 11.4  | 977.4818 | 0.0920 | <a href="#">YPEVDLSR</a>  |
| 11.3  | 977.5004 | 0.0734 | <a href="#">MYIVPAER</a>  |
| 10.7  | 977.5004 | 0.0734 | <a href="#">FMEPLVSR</a>  |
| 10.5  | 977.4865 | 0.0873 | <a href="#">MRAGWVSR</a>  |
| 10.4  | 977.5433 | 0.0305 | <a href="#">YDLVLDK</a>   |
| 9.8   | 977.5328 | 0.0411 | <a href="#">RASAMVLSK</a> |

Mascot: <http://www.matrixscience.com>





# Mascot Search Results

## Peptide View **Spot no 84**

MS/MS Fragmentation of **AAVPSGASTGVYEALELR**

Found in **gi780372** in **NCBIInr**, enolase [Oryza sativa Japonica Group]

Match to Query 65: 1790.074624 from(1791.081900,1+) intensity(0.0000) index(21)

Title: Label: J6, Spot\_Id: 228931, Peak\_List\_Id: 257588, MSMS Job\_Run\_Id: 24927, Comment:

Data file ppw\_J6\_138985135600.txt

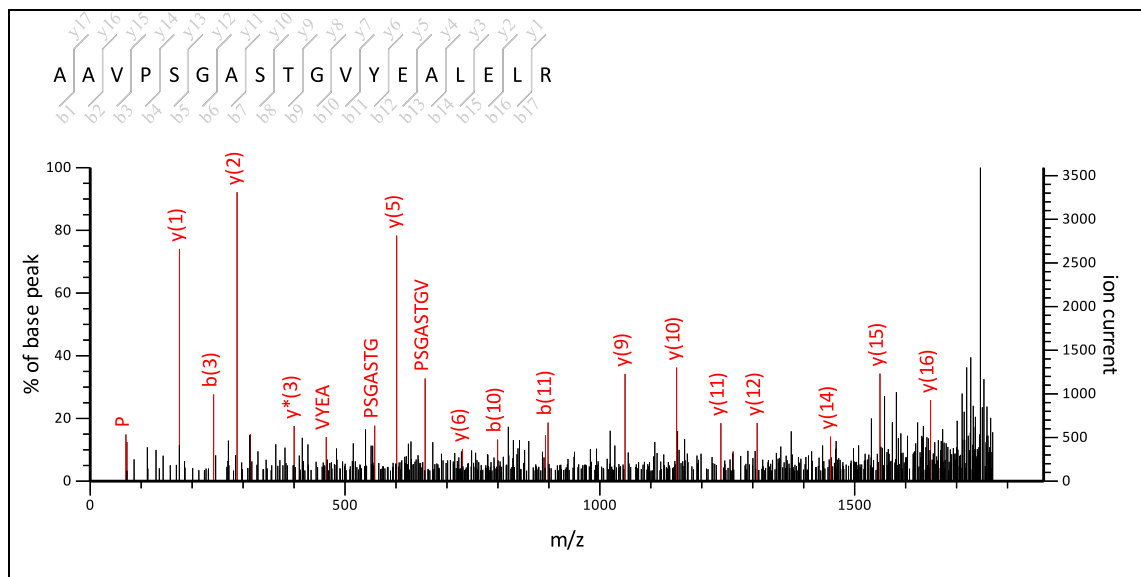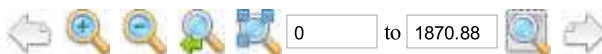

Label all possible matches  Label matches used for scoring

Monoisotopic mass of neutral peptide  $M_r(\text{calc})$ : 1789.9210

Fixed modifications: Carbamidomethyl (C) (apply to specified residues or termini only)

Ions Score: 88 Expect: 1.7e-06

Matches : 29/313 fragment ions using 35 most intense peaks ([help](#))

| #  | Immon.         | a         | a <sup>0</sup> | b                | b <sup>0</sup> | d         | d'       | Seq. | v         | w         | w'        | y                | y*              | y <sup>0</sup> | #  |
|----|----------------|-----------|----------------|------------------|----------------|-----------|----------|------|-----------|-----------|-----------|------------------|-----------------|----------------|----|
| 1  | 44.0495        | 44.0495   |                | <b>72.0444</b>   |                | 44.0495   |          | A    |           |           |           |                  |                 |                | 18 |
| 2  | 44.0495        | 115.0866  |                | 143.0815         |                |           |          | A    | 1703.8599 |           |           | 1719.8912        | 1702.8646       | 1701.8806      | 17 |
| 3  | <b>72.0808</b> | 214.1550  |                | <b>242.1499</b>  |                | 200.1394  |          | V    | 1604.7915 | 1617.8119 |           | <b>1648.8541</b> | 1631.8275       | 1630.8435      | 16 |
| 4  | <b>70.0651</b> | 311.2078  |                | 339.2027         |                | 285.1921  |          | P    | 1507.7387 | 1506.7435 |           | <b>1549.7857</b> | 1532.7591       | 1531.7751      | 15 |
| 5  | 60.0444        | 398.2398  | 380.2292       | 426.2347         | 408.2241       | 382.2449  |          | S    | 1420.7067 | 1419.7114 |           | <b>1452.7329</b> | 1435.7064       | 1434.7223      | 14 |
| 6  | 30.0338        | 455.2613  | 437.2507       | 483.2562         | 465.2456       |           |          | G    |           |           |           | 1365.7009        | 1348.6743       | 1347.6903      | 13 |
| 7  | 44.0495        | 526.2984  | 508.2878       | 554.2933         | 536.2827       |           |          | A    | 1292.6481 |           |           | <b>1308.6794</b> | 1291.6529       | 1290.6688      | 12 |
| 8  | 60.0444        | 613.3304  | 595.3198       | 641.3253         | 623.3148       | 597.3355  |          | S    | 1205.6161 | 1204.6208 |           | <b>1237.6423</b> | 1220.6157       | 1219.6317      | 11 |
| 9  | 74.0600        | 714.3781  | 696.3675       | 742.3730         | 724.3624       | 698.3832  | 700.3624 | T    | 1104.5684 | 1117.5888 | 1119.5681 | <b>1150.6103</b> | 1133.5837       | 1132.5997      | 10 |
| 10 | 30.0338        | 771.3995  | 753.3890       | <b>799.3945</b>  | 781.3839       |           |          | G    |           |           |           | <b>1049.5626</b> | 1032.5360       | 1031.5520      | 9  |
| 11 | <b>72.0808</b> | 870.4680  | 852.4574       | <b>898.4629</b>  | 880.4523       | 856.4523  |          | V    | 948.4785  | 961.4989  |           | 992.5411         | 975.5146        | 974.5306       | 8  |
| 12 | 136.0757       | 1033.5313 | 1015.5207      | 1061.5262        | 1043.5156      |           |          | Y    | 785.4152  |           |           | <b>893.4727</b>  | 876.4462        | 875.4621       | 7  |
| 13 | 102.0550       | 1162.5739 | 1144.5633      | 1190.5688        | 1172.5582      | 1104.5684 |          | E    | 656.3726  | 655.3774  |           | <b>730.4094</b>  | 713.3828        | 712.3988       | 6  |
| 14 | 44.0495        | 1233.6110 | 1215.6004      | <b>1261.6059</b> | 1243.5953      |           |          | A    | 585.3355  |           |           | <b>601.3668</b>  | 584.3402        | 583.3562       | 5  |
| 15 | 86.0964        | 1346.6951 | 1328.6845      | 1374.6900        | 1356.6794      | 1304.6481 |          | L    | 472.2514  | 471.2562  |           | 530.3297         | 513.3031        | 512.3191       | 4  |
| 16 | 102.0550       | 1475.7377 | 1457.7271      | 1503.7326        | 1485.7220      | 1417.7322 |          | E    | 343.2088  | 342.2136  |           | 417.2456         | <b>400.2191</b> | 399.2350       | 3  |
| 17 | 86.0964        | 1588.8217 | 1570.8111      | 1616.8166        | 1598.8061      | 1546.7748 |          | L    | 230.1248  | 229.1295  |           | <b>288.2030</b>  | 271.1765        |                | 2  |
| 18 | 129.1135       |           |                |                  |                |           |          | R    | 74.0237   | 73.0284   |           | <b>175.1190</b>  | 158.0924        |                | 1  |



| Seq      | ya       | yb       | Seq      | ya       | yb       | Seq      | ya       | yb       |
|----------|----------|----------|----------|----------|----------|----------|----------|----------|
| AV       | 143.1179 | 171.1128 | AVP      | 240.1707 | 268.1656 | AVPS     | 327.2027 | 355.1976 |
| AVPSG    | 384.2241 | 412.2191 | AVPSGA   | 455.2613 | 483.2562 | AVPSGAS  | 542.2933 | 570.2882 |
| AVPSGAST | 643.3410 | 671.3359 | VP       | 169.1335 | 197.1285 | VPS      | 256.1656 | 284.1605 |
| VPSG     | 313.1870 | 341.1819 | VPSGA    | 384.2241 | 412.2191 | VPSGAS   | 471.2562 | 499.2511 |
| VPSGAST  | 572.3039 | 600.2988 | VPSGASTG | 629.3253 | 657.3202 | PS       | 157.0972 | 185.0921 |
| PSG      | 214.1186 | 242.1135 | PSGA     | 285.1557 | 313.1506 | PSGAS    | 372.1878 | 400.1827 |
| PSGAST   | 473.2354 | 501.2304 | PSGASTG  | 530.2569 | 558.2518 | PSGASTGV | 629.3253 | 657.3202 |
| SG       | 117.0659 | 145.0608 | SGA      | 188.1030 | 216.0979 | SGAS     | 275.1350 | 303.1299 |
| SGAST    | 376.1827 | 404.1776 | SGASTG   | 433.2041 | 461.1991 | SGASTGV  | 532.2726 | 560.2675 |
| SGASTGVY | 695.3359 | 723.3308 | GA       | 101.0709 | 129.0659 | GAS      | 188.1030 | 216.0979 |
| GAST     | 289.1506 | 317.1456 | GASTG    | 346.1721 | 374.1670 | GASTGV   | 445.2405 | 473.2354 |
| GASTGVY  | 608.3039 | 636.2988 | AS       | 131.0815 | 159.0764 | AST      | 232.1292 | 260.1241 |
| ASTG     | 289.1506 | 317.1456 | ASTGV    | 388.2191 | 416.2140 | ASTGVY   | 551.2824 | 579.2773 |
| ASTGVYE  | 680.3250 | 708.3199 | ST       | 161.0921 | 189.0870 | STG      | 218.1135 | 246.1084 |
| STGV     | 317.1819 | 345.1769 | STGVY    | 480.2453 | 508.2402 | STGVYE   | 609.2879 | 637.2828 |
| STGVYEA  | 680.3250 | 708.3199 | TG       | 131.0815 | 159.0764 | TGV      | 230.1499 | 258.1448 |
| TGVY     | 393.2132 | 421.2082 | TGVYE    | 522.2558 | 550.2508 | TGVYEA   | 593.2930 | 621.2879 |
| GV       | 129.1022 | 157.0972 | GVY      | 292.1656 | 320.1605 | GVYE     | 421.2082 | 449.2031 |
| GVYEA    | 492.2453 | 520.2402 | GVYEAL   | 605.3293 | 633.3243 | VY       | 235.1441 | 263.1390 |
| VYE      | 364.1867 | 392.1816 | VYEA     | 435.2238 | 463.2187 | VYEAL    | 548.3079 | 576.3028 |
| VYEALE   | 677.3505 | 705.3454 | YE       | 265.1183 | 293.1132 | YEA      | 336.1554 | 364.1503 |
| YEALE    | 449.2395 | 477.2344 | YEALE    | 578.2821 | 606.2770 | YEALEL   | 691.3661 | 719.3610 |
| EA       | 173.0921 | 201.0870 | EAL      | 286.1761 | 314.1710 | EALE     | 415.2187 | 443.2136 |
| EALEL    | 528.3028 | 556.2977 | AL       | 157.1335 | 185.1285 | ALE      | 286.1761 | 314.1710 |
| ALEL     | 399.2602 | 427.2551 | LE       | 215.1390 | 243.1339 | LEL      | 328.2231 | 356.2180 |
| EL       | 215.1390 | 243.1339 |          |          |          |          |          |          |

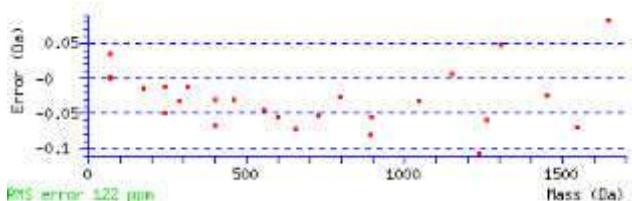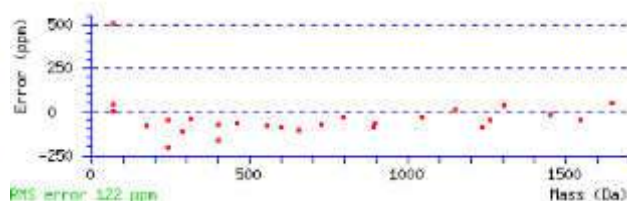

NCBI BLAST search of [AAVPSGASTGVYEALELR](#)

(Parameters: blastp, nr protein database, expect=20000, no filter, PAM30)

Other BLAST [web gateways](#)

#### All matches to this query

| Score | Mr(calc)  | Delta  | Sequence                              |
|-------|-----------|--------|---------------------------------------|
| 88.3  | 1789.9210 | 0.1536 | <a href="#">AAVPSGASTGVYEALELR</a>    |
| 56.6  | 1789.9210 | 0.1536 | <a href="#">AAVPSGASTGIYEAVELR</a>    |
| 19.9  | 1789.9071 | 0.1675 | <a href="#">EEGHVDEPVVARGAGLR</a>     |
| 14.7  | 1789.9210 | 0.1536 | <a href="#">GAVPSGASTGIYEALRL</a>     |
| 13.8  | 1789.9687 | 0.1060 | <a href="#">DSLVDVIPHTLOGQIR</a>      |
| 11.4  | 1789.9951 | 0.0795 | <a href="#">VLLHHLYSRAPSELR</a>       |
| 9.9   | 1790.0050 | 0.0696 | <a href="#">QOLLATTVPGPSAAAIR</a>     |
| 8.7   | 1789.9032 | 0.1714 | <a href="#">AAVEDSVMPAYAAALNR</a>     |
| 8.3   | 1790.0526 | 0.0220 | <a href="#">OLKLAGGPOQLQLLR</a>       |
| 8.3   | 1789.9183 | 0.1563 | <a href="#">AAAGGGSGAGRGTFLGAAVSR</a> |

Mascot: <http://www.matrixscience.com/>



**MATRIX SCIENCE Mascot Search Results**

**Peptide View Spot no 84**

MS/MS Fragmentation of **MTAEIGEQVQIVGDDLLVTNPT R**

Found in **gi780372** in **NCBI nr**, enolase [Oryza sativa Japonica Group]

Match to Query 80: 2498.474124 from(2499.481400,1+) intensity(0.0000) index(26)

Title: Label: J6, Spot\_Id: 228931, Peak\_List\_Id: 257593, MSMS Job\_Run\_Id: 24927, Comment:

Data file ppw\_J6\_138985135600.txt

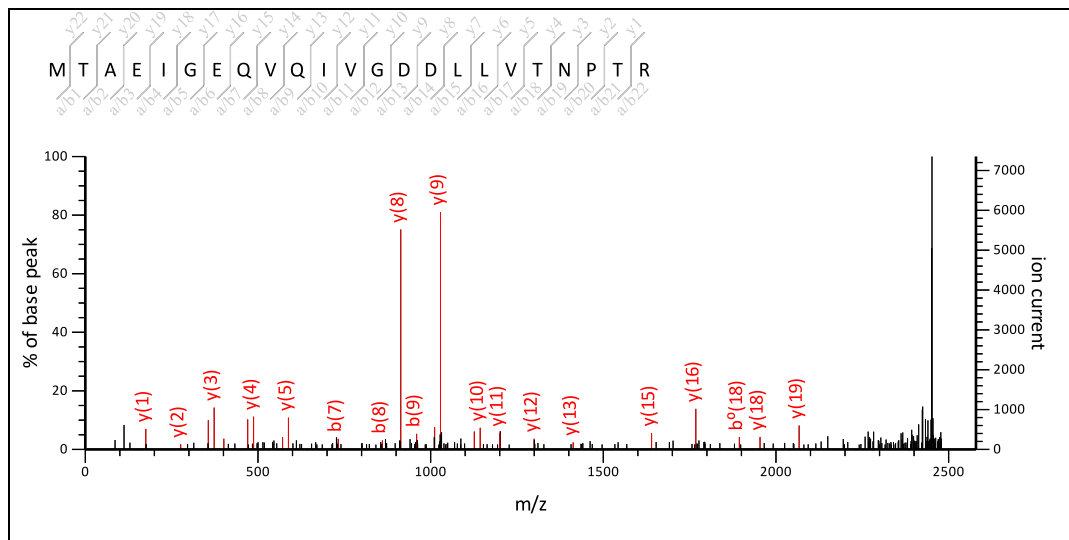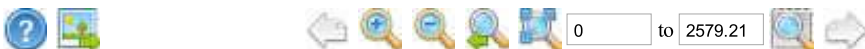

Label all possible matches  Label matches used for scoring

Monoisotopic mass of neutral peptide Mr(calc): 2498.2687

Fixed modifications: Carbamidomethyl (C) (apply to specified residues or termini only)

Ions Score: 96 Expect: 2.3e-07

Matches : 33/457 fragment ions using 47 most intense peaks [\(help\)](#)

| #  | Immon.   | a         | a*        | a <sup>0</sup> | b         | b*        | b <sup>0</sup> | d         | d'        | Seq. | v         | w         | w'        | y         | y*        |
|----|----------|-----------|-----------|----------------|-----------|-----------|----------------|-----------|-----------|------|-----------|-----------|-----------|-----------|-----------|
| 1  | 104.0528 | 104.0528  |           |                | 132.0478  |           |                | 44.0495   |           | M    |           |           |           |           |           |
| 2  | 74.0600  | 205.1005  |           | 187.0900       | 233.0954  |           | 215.0849       | 189.1056  | 191.0849  | T    | 2322.1936 | 2335.2140 | 2337.1932 | 2368.2354 | 2351.2089 |
| 3  | 44.0495  | 276.1376  |           | 258.1271       | 304.1326  |           | 286.1220       |           |           | A    | 2251.1565 |           |           | 2267.1878 | 2250.1612 |
| 4  | 102.0550 | 405.1802  |           | 387.1697       | 433.1751  |           | 415.1646       | 347.1748  |           | E    | 2122.1139 | 2121.1186 |           | 2196.1507 | 2179.1241 |
| 5  | 86.0964  | 518.2643  |           | 500.2537       | 546.2592  |           | 528.2486       | 490.2330  | 504.2486  | I    | 2009.0298 | 2022.0502 | 2036.0659 | 2067.1081 | 2050.0815 |
| 6  | 30.0338  | 575.2858  |           | 557.2752       | 603.2807  |           | 585.2701       |           |           | G    |           |           |           | 1954.0240 | 1936.9974 |
| 7  | 102.0550 | 704.3284  |           | 686.3178       | 732.3233  |           | 714.3127       | 646.3229  |           | E    | 1822.9658 | 1821.9705 |           | 1897.0025 | 1879.9760 |
| 8  | 101.0709 | 832.3869  | 815.3604  | 814.3764       | 860.3818  | 843.3553  | 842.3713       | 775.3655  |           | Q    | 1694.9072 | 1693.9119 |           | 1767.9599 | 1750.9334 |
| 9  | 72.0808  | 931.4553  | 914.4288  | 913.4448       | 959.4503  | 942.4237  | 941.4397       | 917.4397  |           | V    | 1595.8388 | 1608.8592 |           | 1639.9014 | 1622.8748 |
| 10 | 101.0709 | 1059.5139 | 1042.4874 | 1041.5034      | 1087.5088 | 1070.4823 | 1069.4983      | 1002.4925 |           | Q    | 1467.7802 | 1466.7849 |           | 1540.8329 | 1523.8064 |
| 11 | 86.0964  | 1172.5980 | 1155.5714 | 1154.5874      | 1200.5929 | 1183.5664 | 1182.5823      | 1144.5667 | 1158.5823 | I    | 1354.6961 | 1367.7165 | 1381.7322 | 1412.7744 | 1395.7478 |
| 12 | 72.0808  | 1271.6664 | 1254.6399 | 1253.6558      | 1299.6613 | 1282.6348 | 1281.6508      | 1257.6508 |           | V    | 1255.6277 | 1268.6481 |           | 1299.6903 | 1282.6638 |
| 13 | 30.0338  | 1328.6879 | 1311.6613 | 1310.6773      | 1356.6828 | 1339.6562 | 1338.6722      |           |           | G    |           |           |           | 1200.6219 | 1183.5953 |
| 14 | 88.0393  | 1443.7148 | 1426.6883 | 1425.7042      | 1471.7097 | 1454.6832 | 1453.6992      | 1399.7250 |           | D    | 1083.5793 | 1082.5841 |           | 1143.6004 | 1126.5739 |
| 15 | 88.0393  | 1558.7418 | 1541.7152 | 1540.7312      | 1586.7367 | 1569.7101 | 1568.7261      | 1514.7519 |           | D    | 968.5524  | 967.5571  |           | 1028.5735 | 1011.5469 |
| 16 | 86.0964  | 1671.8258 | 1654.7993 | 1653.8152      | 1699.8207 | 1682.7942 | 1681.8102      | 1629.7789 |           | L    | 855.4683  | 854.4730  |           | 913.5465  | 896.5200  |
| 17 | 86.0964  | 1784.9099 | 1767.8833 | 1766.8993      | 1812.9048 | 1795.8782 | 1794.8942      | 1742.8629 |           | L    | 742.3842  | 741.3890  |           | 800.4625  | 783.4359  |
| 18 | 72.0808  | 1883.9783 | 1866.9517 | 1865.9677      | 1911.9732 | 1894.9467 | 1893.9626      | 1869.9626 |           | V    | 643.3158  | 656.3362  |           | 687.3784  | 670.3519  |
| 19 | 74.0600  | 1985.0260 | 1967.9994 | 1967.0154      | 2013.0209 | 1995.9943 | 1995.0103      | 1969.0311 | 1971.0103 | T    | 542.2681  | 555.2885  | 557.2678  | 588.3100  | 571.2835  |
| 20 | 87.0553  | 2099.0689 | 2082.0423 | 2081.0583      | 2127.0638 | 2110.0373 | 2109.0532      | 2056.0631 |           | N    | 428.2252  | 427.2300  |           | 487.2623  | 470.2358  |
| 21 | 70.0651  | 2196.1217 | 2179.0951 | 2178.1111      | 2224.1166 | 2207.0900 | 2206.1060      | 2170.1060 |           | P    | 331.1724  | 330.1772  |           | 373.2194  | 356.1928  |
| 22 | 74.0600  | 2297.1693 | 2280.1428 | 2279.1588      | 2325.1643 | 2308.1377 | 2307.1537      | 2281.1744 | 2283.1537 | T    | 230.1248  | 243.1452  | 245.1244  | 276.1666  | 259.1401  |

|    |          |  |  |  |  |  |  |  |  |  |  |   |         |         |  |  |          |          |
|----|----------|--|--|--|--|--|--|--|--|--|--|---|---------|---------|--|--|----------|----------|
| 23 | 129.1135 |  |  |  |  |  |  |  |  |  |  | R | 74.0237 | 73.0284 |  |  | 175.1190 | 158.0924 |
|----|----------|--|--|--|--|--|--|--|--|--|--|---|---------|---------|--|--|----------|----------|

| Seq   | ya       | yb       | Seq    | ya       | yb       | Seq   | ya       | yb       |
|-------|----------|----------|--------|----------|----------|-------|----------|----------|
| TA    | 145.0972 | 173.0921 | TAE    | 274.1397 | 302.1347 | TAEI  | 387.2238 | 415.2187 |
| TAEIG | 444.2453 | 472.2402 | TAEIGE | 573.2879 | 601.2828 | AE    | 173.0921 | 201.0870 |
| AEI   | 286.1761 | 314.1710 | AEIG   | 343.1976 | 371.1925 | AEIGE | 472.2402 | 500.2351 |
| AEIGE | 600.2988 | 628.2937 | AEIGE  | 699.3672 | 727.3621 | EI    | 215.1390 | 243.1339 |
| EIG   | 272.1605 | 300.1554 | EIGE   | 401.2031 | 429.1980 | EIGE  | 529.2617 | 557.2566 |
| EIGE  | 628.3301 | 656.3250 | IG     | 143.1179 | 171.1128 | IGE   | 272.1605 | 300.1554 |
| IGE   | 400.2191 | 428.2140 | IGEQ   | 499.2875 | 527.2824 | IGEQ  | 627.3461 | 655.3410 |
| GE    | 159.0764 | 187.0713 | GEQ    | 287.1350 | 315.1299 | GEQ   | 386.2034 | 414.1983 |
| GEQ   | 514.2620 | 542.2569 | GEQ    | 627.3461 | 655.3410 | EQ    | 230.1135 | 258.1084 |
| EQV   | 329.1819 | 357.1769 | EQV    | 457.2405 | 485.2354 | EQV   | 570.3246 | 598.3195 |
| EQV   | 669.3930 | 697.3879 | QV     | 200.1394 | 228.1343 | QV    | 328.1979 | 356.1928 |
| QV    | 441.2820 | 469.2769 | QV     | 540.3504 | 568.3453 | QV    | 597.3719 | 625.3668 |
| VQ    | 200.1394 | 228.1343 | VQ     | 313.2234 | 341.2183 | VQ    | 412.2918 | 440.2867 |
| VQ    | 469.3133 | 497.3082 | VQ     | 584.3402 | 612.3352 | VQ    | 699.3672 | 727.3621 |
| QI    | 214.1550 | 242.1499 | QI     | 313.2234 | 341.2183 | QI    | 370.2449 | 398.2398 |
| QI    | 485.2718 | 513.2667 | QI     | 600.2988 | 628.2937 | IV    | 185.1648 | 213.1598 |
| IV    | 242.1863 | 270.1812 | IV     | 357.2132 | 385.2082 | IV    | 472.2402 | 500.2351 |
| IV    | 585.3243 | 613.3192 | IV     | 698.4083 | 726.4032 | VG    | 129.1022 | 157.0972 |
| VGD   | 244.1292 | 272.1241 | VGD    | 359.1561 | 387.1510 | VGD   | 472.2402 | 500.2351 |
| VGD   | 585.3243 | 613.3192 | VGD    | 684.3927 | 712.3876 | GD    | 145.0608 | 173.0557 |
| GDD   | 260.0877 | 288.0826 | GDD    | 373.1718 | 401.1667 | GDD   | 486.2558 | 514.2508 |
| GDD   | 585.3243 | 613.3192 | GDD    | 686.3719 | 714.3668 | DD    | 203.0662 | 231.0612 |
| DDL   | 316.1503 | 344.1452 | DDL    | 429.2344 | 457.2293 | DDL   | 528.3028 | 556.2977 |
| DDL   | 629.3505 | 657.3454 | DL     | 201.1234 | 229.1183 | DL    | 314.2074 | 342.2023 |
| DLL   | 413.2758 | 441.2708 | DLL    | 514.3235 | 542.3184 | DLL   | 628.3665 | 656.3614 |
| LL    | 199.1805 | 227.1754 | LL     | 298.2489 | 326.2438 | LL    | 399.2966 | 427.2915 |
| LL    | 513.3395 | 541.3344 | LL     | 610.3923 | 638.3872 | LV    | 185.1648 | 213.1598 |
| LVT   | 286.2125 | 314.2074 | LVT    | 400.2554 | 428.2504 | LVT   | 497.3082 | 525.3031 |
| LVT   | 598.3559 | 626.3508 | VT     | 173.1285 | 201.1234 | VT    | 287.1714 | 315.1663 |
| VTNP  | 384.2241 | 412.2191 | VTNP   | 485.2718 | 513.2667 | TN    | 188.1030 | 216.0979 |
| TNP   | 285.1557 | 313.1506 | TNP    | 386.2034 | 414.1983 | NP    | 184.1081 | 212.1030 |
| NPT   | 285.1557 | 313.1506 | PT     | 171.1128 | 199.1077 |       |          |          |

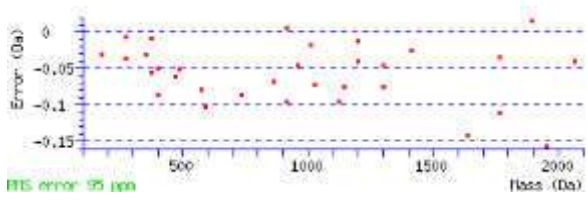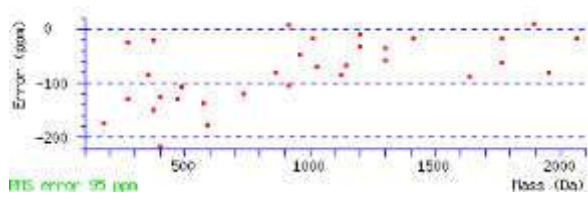

NCBI BLAST search of [MTAEIGEQVQIVGDDLLVTNPTR](#)  
 (Parameters: blastp, nr protein database, expect=20000, no filter, PAM30)  
 Other BLAST [web gateways](#)

All matches to this query

| Score | Mr(calc)  | Delta  | Sequence                                   |
|-------|-----------|--------|--------------------------------------------|
| 95.7  | 2498.2687 | 0.2055 | <a href="#">MTAEIGEQVQIVGDDLLVTNPTR</a>    |
| 8.3   | 2498.3063 | 0.1678 | <a href="#">DTAISDEKPARIMAARPPPPPPR</a>    |
| 8.0   | 2498.3493 | 0.1248 | <a href="#">QGLLERSGVFVVEGDINDAVLLR</a>    |
| 5.0   | 2498.3163 | 0.1579 | <a href="#">LSTNATASAPAATAASPGVVDVLMKR</a> |
| 1.7   | 2498.2919 | 0.1822 | <a href="#">VAMFSGSILLDIYDYFVKR</a>        |
| 0.6   | 2498.2289 | 0.2452 | <a href="#">RLAEAGYVPDVSSVLHDIGDEEK</a>    |
| 0.3   | 2498.2911 | 0.1830 | <a href="#">MRELYSSSTSSPTAALVAAGHAALR</a>  |



# MATRIX SCIENCE Mascot Search Results

## Peptide View **Spot no 85**

MS/MS Fragmentation of **IGLFGGAGVGK**

Found in **gi|3676294** in **NCBI nr**, mitochondrial ATPase beta subunit [*Nicotiana sylvestris*]

Match to Query 63: 974.560904 from(975.568180,1+) intensity(0.0000) index(3)

Title: Label: F15, Spot\_Id: 219903, Peak\_List\_Id: 228328, MSMS Job\_Run\_Id: 21987, Comment:

Data file C:\Documents and Settings\Administrator\Desktop\Farah-Garima 11May 2013\ppw\_F15\_136868277600.txt

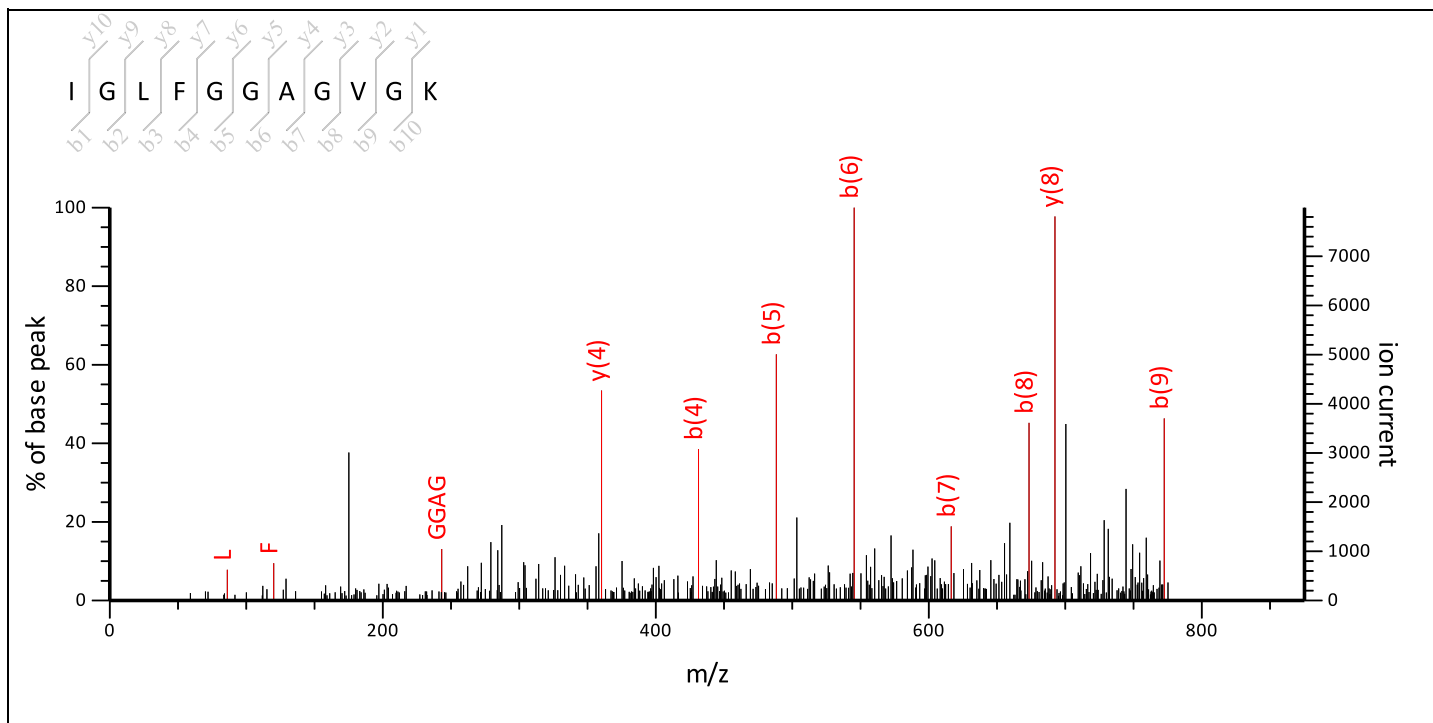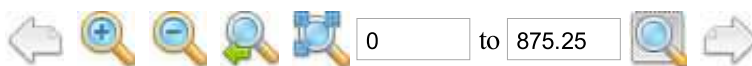

Label all possible matches  Label matches used for scoring

**Monoisotopic mass of neutral peptide Mr(calc):** 974.5549

**Fixed modifications:** Carbamidomethyl (C) (apply to specified residues or termini only)

**Ions Score:** 46 **Expect:** 1

**Matches:** 16/133 fragment ions using 16 most intense peaks ([help](#))

| # | Immon.   | a        | b        | d        | Seq. | v        | w        | y        | y*       | #  |
|---|----------|----------|----------|----------|------|----------|----------|----------|----------|----|
| 1 | 86.0964  | 86.0964  | 114.0913 | 44.0495  | I    |          |          |          |          | 11 |
| 2 | 30.0338  | 143.1179 | 171.1128 |          | G    |          |          | 862.4781 | 845.4516 | 10 |
| 3 | 86.0964  | 256.2020 | 284.1969 | 214.1550 | L    | 747.3784 | 746.3832 | 805.4567 | 788.4301 | 9  |
| 4 | 120.0808 | 403.2704 | 431.2653 |          | F    | 600.3100 |          | 692.3726 | 675.3461 | 8  |
| 5 | 30.0338  | 460.2918 | 488.2867 |          | G    |          |          | 545.3042 | 528.2776 | 7  |
| 6 | 30.0338  | 517.3133 | 545.3082 |          | G    |          |          | 488.2827 | 471.2562 | 6  |
| 7 | 44.0495  | 588.3504 | 616.3453 |          | A    | 415.2300 |          | 431.2613 | 414.2347 | 5  |
| 8 | 30.0338  | 645.3719 | 673.3668 |          | G    |          |          | 360.2241 | 343.1976 | 4  |

|    |          |          |          |          |   |          |          |          |          |   |
|----|----------|----------|----------|----------|---|----------|----------|----------|----------|---|
| 9  | 72.0808  | 744.4403 | 772.4352 | 730.4246 | V | 259.1401 | 272.1605 | 303.2027 | 286.1761 | 3 |
| 10 | 30.0338  | 801.4618 | 829.4567 |          | G |          |          | 204.1343 | 187.1077 | 2 |
| 11 | 101.1073 |          |          |          | K | 74.0237  | 73.0284  | 147.1128 | 130.0863 | 1 |

| Seq      | ya       | yb       | Seq       | ya       | yb       | Seq      | ya       | yb       |
|----------|----------|----------|-----------|----------|----------|----------|----------|----------|
| GL       | 143.1179 | 171.1128 | GLF       | 290.1863 | 318.1812 | GLFG     | 347.2078 | 375.2027 |
| GLFGG    | 404.2292 | 432.2241 | GLFGGA    | 475.2663 | 503.2613 | GLFGGAG  | 532.2878 | 560.2827 |
| GLFGGAGV | 631.3562 | 659.3511 | GLFGGAGVG | 688.3777 | 716.3726 | LF       | 233.1648 | 261.1598 |
| LFG      | 290.1863 | 318.1812 | LFGG      | 347.2078 | 375.2027 | LFGGA    | 418.2449 | 446.2398 |
| LFGGAG   | 475.2663 | 503.2613 | LFGGAGV   | 574.3348 | 602.3297 | LFGGAGVG | 631.3562 | 659.3511 |
| FG       | 177.1022 | 205.0972 | FGG       | 234.1237 | 262.1186 | FGGA     | 305.1608 | 333.1557 |
| FGGAG    | 362.1823 | 390.1772 | FGGAGV    | 461.2507 | 489.2456 | FGGAGVG  | 518.2722 | 546.2671 |
| GG       | 87.0553  | 115.0502 | GGA       | 158.0924 | 186.0873 | GGAG     | 215.1139 | 243.1088 |
| GGAGV    | 314.1823 | 342.1772 | GGAGVG    | 371.2037 | 399.1987 | GA       | 101.0709 | 129.0659 |
| GAG      | 158.0924 | 186.0873 | GAGV      | 257.1608 | 285.1557 | GAGVG    | 314.1823 | 342.1772 |
| AG       | 101.0709 | 129.0659 | AGV       | 200.1394 | 228.1343 | AGVG     | 257.1608 | 285.1557 |
| GV       | 129.1022 | 157.0972 | GVG       | 186.1237 | 214.1186 | VG       | 129.1022 | 157.0972 |

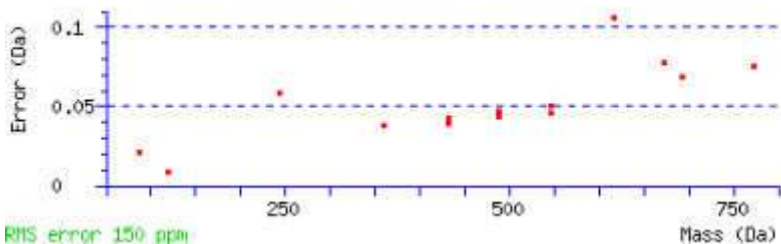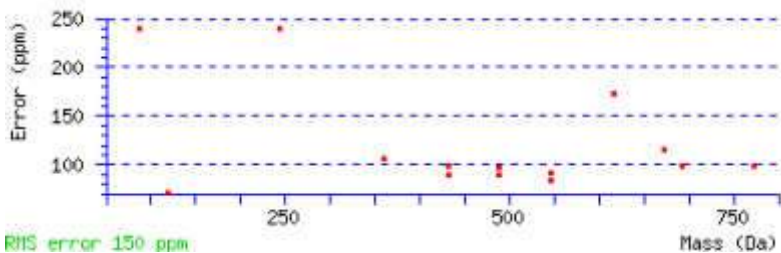

NCBI BLAST search of [IGLFGGAGVGK](#)

(Parameters: blastp, nr protein database, expect=20000, no filter, PAM30)

Other BLAST [web gateways](#)

All matches to this query

| Score | Mr(calc) | Delta  | Sequence                    |
|-------|----------|--------|-----------------------------|
| 46.9  | 974.5549 | 0.0060 | <a href="#">IAVFGGAGVGK</a> |
| 46.9  | 974.5549 | 0.0060 | <a href="#">IGIFGGAGVGK</a> |
| 46.9  | 974.5549 | 0.0060 | <a href="#">IGIFGGAGVGK</a> |
| 46.9  | 974.5219 | 0.0390 | <a href="#">IGIMGGAGVGK</a> |
| 46.9  | 974.5549 | 0.0060 | <a href="#">LGIFGGAGVGK</a> |
| 46.3  | 974.5549 | 0.0060 | <a href="#">IGLFGGAGVGK</a> |
| 46.3  | 974.5549 | 0.0060 | <a href="#">IGLFGGAGVGK</a> |



|      |          |        |                             |
|------|----------|--------|-----------------------------|
| 46.3 | 974.5549 | 0.0060 | <a href="#">IGLFGGAGVGK</a> |
| 46.3 | 974.5549 | 0.0060 | <a href="#">IGLFGGAGVGK</a> |
| 46.3 | 974.5549 | 0.0060 | <a href="#">IGLFGGAGVGK</a> |

**Mascot:** <http://www.matrixscience.com/>


**Mascot Search Results**
**Peptide View Spot no 85**
MS/MS Fragmentation of **TIAMDGTEGLVR**Found in **gi3676294** in **NCBI**nr, mitochondrial ATPase beta subunit [Nicotiana sylvestris]

Match to Query 175: 1261.664924 from(1262.672200,1+) intensity(0.0000) index(13)

Title: Label: F15, Spot\_Id: 219903, Peak\_List\_Id: 228326, MSMS Job\_Run\_Id: 21987, Comment:

Data file C:\Documents and Settings\Administrator\Desktop\Farah-Garima 11May 2013\ppw\_F15\_136868277600.txt

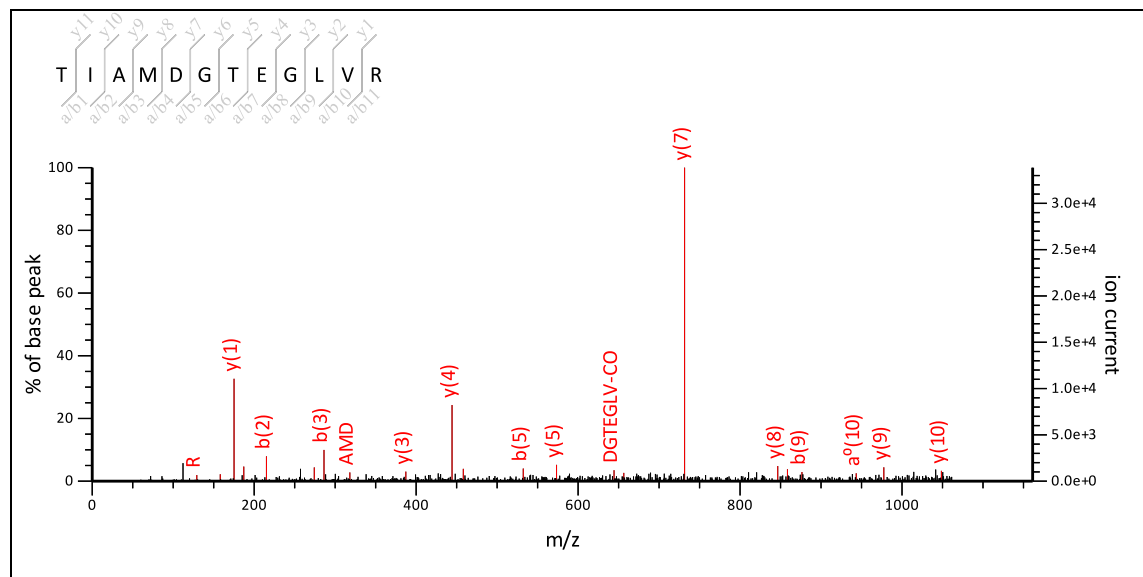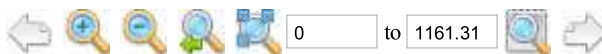Label all possible matches  Label matches used for scoring Monoisotopic mass of neutral peptide  $M_r(\text{calc})$ : 1261.6336

Fixed modifications: Carbamidomethyl (C) (apply to specified residues or termini only)

Ions Score: 72 Expect: 0.0023

Matches : 27/190 fragment ions using 31 most intense peaks ([help](#))

| #  | Immon.   | a         | a <sup>0</sup> | b         | b <sup>0</sup> | d         | d'       | Seq. | v         | w         | w'        | y         | y*        | y <sup>0</sup> | #  |
|----|----------|-----------|----------------|-----------|----------------|-----------|----------|------|-----------|-----------|-----------|-----------|-----------|----------------|----|
| 1  | 74.0600  | 74.0600   | 56.0495        | 102.0550  | 84.0444        | 44.0495   |          | T    |           |           |           |           |           |                | 12 |
| 2  | 86.0964  | 187.1441  | 169.1335       | 215.1390  | 197.1285       | 159.1128  | 173.1285 | I    | 1103.5150 | 1116.5354 | 1130.5510 | 1161.5932 | 1144.5667 | 1143.5827      | 11 |
| 3  | 44.0495  | 258.1812  | 240.1707       | 286.1761  | 268.1656       |           |          | A    | 1032.4779 |           |           | 1048.5092 | 1031.4826 | 1030.4986      | 10 |
| 4  | 104.0528 | 389.2217  | 371.2111       | 417.2166  | 399.2061       | 329.2183  |          | M    | 901.4374  | 900.4421  |           | 977.4721  | 960.4455  | 959.4615       | 9  |
| 5  | 88.0393  | 504.2486  | 486.2381       | 532.2436  | 514.2330       | 460.2588  |          | D    | 786.4104  | 785.4152  |           | 846.4316  | 829.4050  | 828.4210       | 8  |
| 6  | 30.0338  | 561.2701  | 543.2595       | 589.2650  | 571.2545       |           |          | G    |           |           |           | 731.4046  | 714.3781  | 713.3941       | 7  |
| 7  | 74.0600  | 662.3178  | 644.3072       | 690.3127  | 672.3021       | 646.3229  | 648.3021 | T    | 628.3413  | 641.3617  | 643.3410  | 674.3832  | 657.3566  | 656.3726       | 6  |
| 8  | 102.0550 | 791.3604  | 773.3498       | 819.3553  | 801.3447       | 733.3549  |          | E    | 499.2987  | 498.3035  |           | 573.3355  | 556.3089  | 555.3249       | 5  |
| 9  | 30.0338  | 848.3818  | 830.3713       | 876.3768  | 858.3662       |           |          | G    |           |           |           | 444.2929  | 427.2663  |                | 4  |
| 10 | 86.0964  | 961.4659  | 943.4553       | 989.4608  | 971.4503       | 919.4190  |          | L    | 329.1932  | 328.1979  |           | 387.2714  | 370.2449  |                | 3  |
| 11 | 72.0808  | 1060.5343 | 1042.5238      | 1088.5292 | 1070.5187      | 1046.5187 |          | V    | 230.1248  | 243.1452  |           | 274.1874  | 257.1608  |                | 2  |
| 12 | 129.1135 |           |                |           |                |           |          | R    | 74.0237   | 73.0284   |           | 175.1190  | 158.0924  |                | 1  |

| Seq   | ya       | yb       | Seq    | ya       | yb       | Seq     | ya       | yb       |
|-------|----------|----------|--------|----------|----------|---------|----------|----------|
| IA    | 157.1335 | 185.1285 | IAM    | 288.1740 | 316.1689 | IAMD    | 403.2010 | 431.1959 |
| IAMDG | 460.2224 | 488.2173 | IAMDGT | 561.2701 | 589.2650 | IAMDGTE | 690.3127 | 718.3076 |
| AM    | 175.0900 | 203.0849 | AMD    | 290.1169 | 318.1118 | AMDG    | 347.1384 | 375.1333 |
| AMDGT | 448.1860 | 476.1810 | AMDGTE | 577.2286 | 605.2236 | AMDGTEG | 634.2501 | 662.2450 |
| MD    | 219.0798 | 247.0747 | MDG    | 276.1013 | 304.0962 | MDGT    | 377.1489 | 405.1438 |

|              |          |                 |               |          |                 |                |                 |          |
|--------------|----------|-----------------|---------------|----------|-----------------|----------------|-----------------|----------|
| <b>MDGTE</b> | 506.1915 | 534.1864        | <b>MDGTEG</b> | 563.2130 | 591.2079        | <b>MDGTEGL</b> | 676.2971        | 704.2920 |
| <b>DG</b>    | 145.0608 | 173.0557        | <b>DGT</b>    | 246.1084 | <b>274.1034</b> | <b>DGTE</b>    | 375.1510        | 403.1460 |
| <b>DGTEG</b> | 432.1725 | 460.1674        | <b>DGTEGL</b> | 545.2566 | <b>573.2515</b> | <b>DGTEGLV</b> | <b>644.3250</b> | 672.3199 |
| <b>GT</b>    | 131.0815 | 159.0764        | <b>GTE</b>    | 260.1241 | 288.1190        | <b>GTEG</b>    | 317.1456        | 345.1405 |
| <b>GTEGL</b> | 430.2296 | <b>458.2245</b> | <b>GTEGLV</b> | 529.2980 | 557.2930        | <b>TE</b>      | 203.1026        | 231.0975 |
| <b>TEG</b>   | 260.1241 | 288.1190        | <b>TEGL</b>   | 373.2082 | 401.2031        | <b>TEGLV</b>   | 472.2766        | 500.2715 |
| <b>EG</b>    | 159.0764 | <b>187.0713</b> | <b>EGL</b>    | 272.1605 | 300.1554        | <b>EGLV</b>    | 371.2289        | 399.2238 |
| <b>GL</b>    | 143.1179 | 171.1128        | <b>GLV</b>    | 242.1863 | 270.1812        | <b>LV</b>      | 185.1648        | 213.1598 |

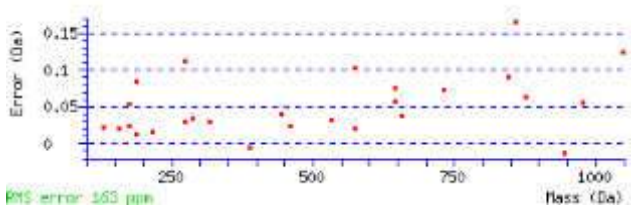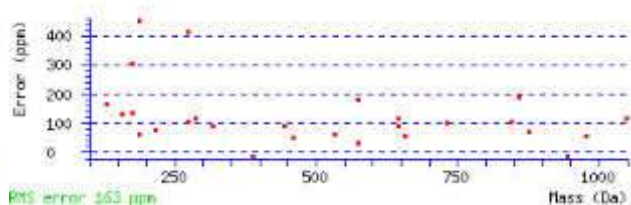

NCBI BLAST search of [TIAMDGTEGLVR](#)

(Parameters: blastp, nr protein database, expect=20000, no filter, PAM30)

Other BLAST [web gateways](#)

#### All matches to this query

| Score | Mr(calc)  | Delta   | Sequence                      |
|-------|-----------|---------|-------------------------------|
| 72.2  | 1261.6336 | 0.0313  | <a href="#">TIAMDGTEGLVR</a>  |
| 72.2  | 1261.6336 | 0.0313  | <a href="#">TIAMDGTEGLVR</a>  |
| 60.1  | 1261.6336 | 0.0313  | <a href="#">TIAMDATDGLVR</a>  |
| 43.9  | 1261.6336 | 0.0313  | <a href="#">TIAMDGTDGLIR</a>  |
| 43.1  | 1261.6336 | 0.0313  | <a href="#">AIAMEGTEGLVR</a>  |
| 43.0  | 1261.6336 | 0.0313  | <a href="#">TIAMEGTDGLVR</a>  |
| 38.7  | 1261.6159 | 0.0491  | <a href="#">VDADMAAMAVLR</a>  |
| 37.5  | 1261.7143 | -0.0493 | <a href="#">ITAIHPGEGIVR</a>  |
| 35.6  | 1261.5721 | 0.0928  | <a href="#">SVVMDGAAADGNR</a> |
| 34.5  | 1261.6667 | -0.0017 | <a href="#">GSELVDAEGIVR</a>  |

Mascot: <http://www.matrixscience.com/>



# Mascot Search Results

## Peptide View **Spot no 85**

MS/MS Fragmentation of **AHGGFSVFAGVGER**

Found in **gi3676294** in **NCBIInr**, mitochondrial ATPase beta subunit [Nicotiana sylvestris]

Match to Query 200: 1389.721024 from(1390.728300,1+) intensity(0.0000) index(17)

Title: Label: F15, Spot\_Id: 219903, Peak\_List\_Id: 228324, MSMS Job\_Run\_Id: 21987, Comment:

Data file C:\Documents and Settings\Administrator\Desktop\Farah-Garima 11May 2013\ppw\_F15\_136868277600.txt

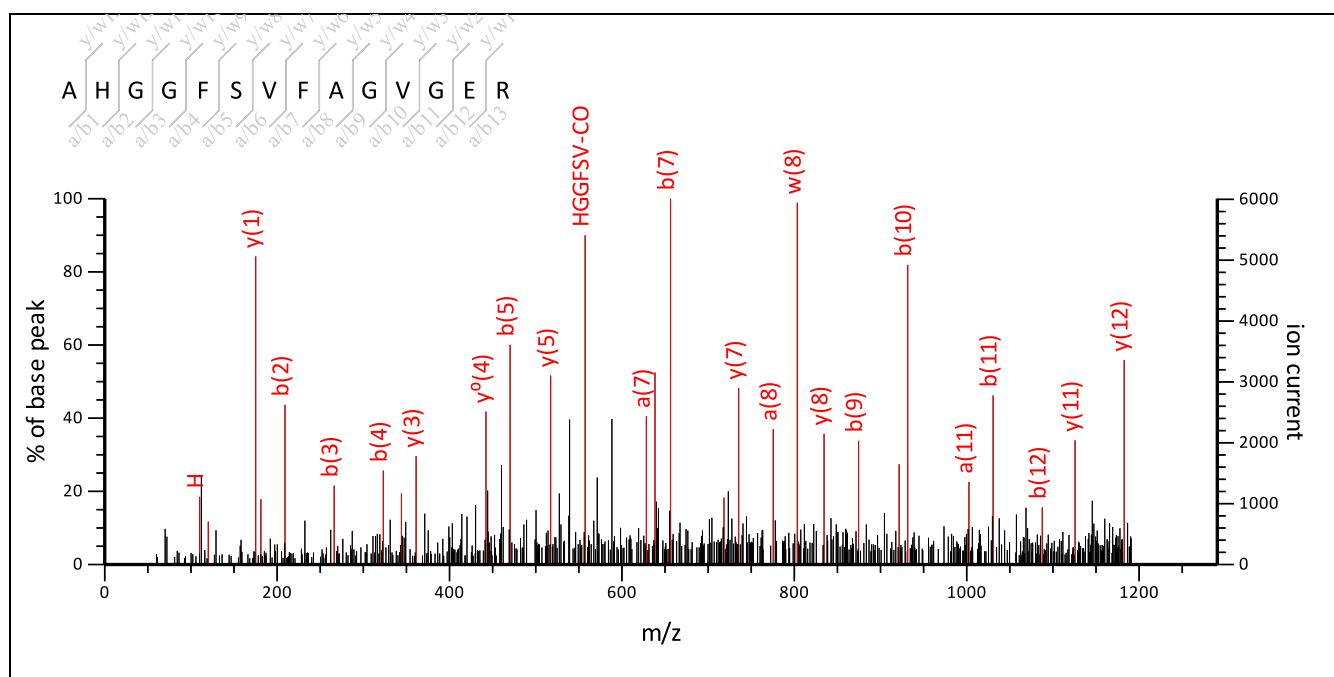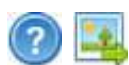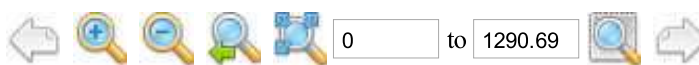

Label all possible matches  Label matches used for scoring

**Monoisotopic mass of neutral peptide Mr(calc):** 1389.6790

**Fixed modifications:** Carbamidomethyl (C) (apply to specified residues or termini only)

**Ions Score:** 101 **Expect:** 2.9e-06

**Matches :** 35/213 fragment ions using 36 most intense peaks ([help](#))

| #  | Immon.   | a         | a <sup>0</sup> | b         | b <sup>0</sup> | d        | Seq. | v         | w        | y         | y*        | y <sup>0</sup> | #  |
|----|----------|-----------|----------------|-----------|----------------|----------|------|-----------|----------|-----------|-----------|----------------|----|
| 1  | 44.0495  | 44.0495   |                | 72.0444   |                | 44.0495  | A    |           |          |           |           |                | 14 |
| 2  | 110.0713 | 181.1084  |                | 209.1033  |                |          | H    | 1237.5960 |          | 1319.6491 | 1302.6226 | 1301.6385      | 13 |
| 3  | 30.0338  | 238.1299  |                | 266.1248  |                |          | G    |           |          | 1182.5902 | 1165.5636 | 1164.5796      | 12 |
| 4  | 30.0338  | 295.1513  |                | 323.1462  |                |          | G    |           |          | 1125.5687 | 1108.5422 | 1107.5582      | 11 |
| 5  | 120.0808 | 442.2197  |                | 470.2146  |                |          | F    | 976.4847  |          | 1068.5473 | 1051.5207 | 1050.5367      | 10 |
| 6  | 60.0444  | 529.2518  | 511.2412       | 557.2467  | 539.2361       | 513.2568 | S    | 889.4526  | 888.4574 | 921.4789  | 904.4523  | 903.4683       | 9  |
| 7  | 72.0808  | 628.3202  | 610.3096       | 656.3151  | 638.3045       | 614.3045 | V    | 790.3842  | 803.4046 | 834.4468  | 817.4203  | 816.4363       | 8  |
| 8  | 120.0808 | 775.3886  | 757.3780       | 803.3835  | 785.3729       |          | F    | 643.3158  |          | 735.3784  | 718.3519  | 717.3678       | 7  |
| 9  | 44.0495  | 846.4257  | 828.4151       | 874.4206  | 856.4100       |          | A    | 572.2787  |          | 588.3100  | 571.2835  | 570.2994       | 6  |
| 10 | 30.0338  | 903.4472  | 885.4366       | 931.4421  | 913.4315       |          | G    |           |          | 517.2729  | 500.2463  | 499.2623       | 5  |
| 11 | 72.0808  | 1002.5156 | 984.5050       | 1030.5105 | 1012.4999      | 988.4999 | V    | 416.1888  | 429.2092 | 460.2514  | 443.2249  | 442.2409       | 4  |

|    |          |           |           |                  |           |           |          |          |          |                 |                 |          |          |
|----|----------|-----------|-----------|------------------|-----------|-----------|----------|----------|----------|-----------------|-----------------|----------|----------|
| 12 | 30.0338  | 1059.5370 | 1041.5265 | <b>1087.5320</b> | 1069.5214 |           | <b>G</b> |          |          | <b>361.1830</b> | <b>344.1565</b> | 343.1724 | <b>3</b> |
| 13 | 102.0550 | 1188.5796 | 1170.5691 | 1216.5745        | 1198.5640 | 1130.5742 | <b>E</b> | 230.1248 | 229.1295 | 304.1615        | 287.1350        | 286.1510 | <b>2</b> |
| 14 | 129.1135 |           |           |                  |           |           | <b>R</b> | 74.0237  | 73.0284  | <b>175.1190</b> | 158.0924        |          | <b>1</b> |

| Seq    | ya       | yb       | Seq     | ya              | yb       | Seq      | ya              | yb       |
|--------|----------|----------|---------|-----------------|----------|----------|-----------------|----------|
| HG     | 167.0927 | 195.0877 | HGG     | 224.1142        | 252.1091 | HGGF     | 371.1826        | 399.1775 |
| HGGFS  | 458.2146 | 486.2096 | HGGFSV  | <b>557.2831</b> | 585.2780 | GG       | 87.0553         | 115.0502 |
| GGF    | 234.1237 | 262.1186 | GGFS    | 321.1557        | 349.1506 | GGFSV    | 420.2241        | 448.2191 |
| GGFSVF | 567.2926 | 595.2875 | GGFSVFA | <b>638.3297</b> | 666.3246 | GGFSVFAG | 695.3511        | 723.3461 |
| GF     | 177.1022 | 205.0972 | GFS     | 264.1343        | 292.1292 | GFSV     | 363.2027        | 391.1976 |
| GFSVF  | 510.2711 | 538.2660 | GFSVFA  | 581.3082        | 609.3031 | GFSVFAG  | <b>638.3297</b> | 666.3246 |
| FS     | 207.1128 | 235.1077 | FSV     | 306.1812        | 334.1761 | FSVF     | 453.2496        | 481.2445 |
| FSVFA  | 524.2867 | 552.2817 | FSVFAG  | 581.3082        | 609.3031 | FSVFAGV  | 680.3766        | 708.3715 |
| SV     | 159.1128 | 187.1077 | SVF     | 306.1812        | 334.1761 | SVFA     | 377.2183        | 405.2132 |
| SVFAG  | 434.2398 | 462.2347 | SVFAGV  | 533.3082        | 561.3031 | SVFAGVG  | 590.3297        | 618.3246 |
| VF     | 219.1492 | 247.1441 | VFA     | 290.1863        | 318.1812 | VFAG     | 347.2078        | 375.2027 |
| VFAGV  | 446.2762 | 474.2711 | VFAGVG  | 503.2976        | 531.2926 | VFAGVGE  | 632.3402        | 660.3352 |
| FA     | 191.1179 | 219.1128 | FAG     | 248.1394        | 276.1343 | FAGV     | 347.2078        | 375.2027 |
| FAGVG  | 404.2292 | 432.2241 | FAGVGE  | 533.2718        | 561.2667 | AG       | 101.0709        | 129.0659 |
| AGV    | 200.1394 | 228.1343 | AGVG    | 257.1608        | 285.1557 | AGVGE    | 386.2034        | 414.1983 |
| GV     | 129.1022 | 157.0972 | GVG     | 186.1237        | 214.1186 | GVGE     | 315.1663        | 343.1612 |
| VG     | 129.1022 | 157.0972 | VGE     | 258.1448        | 286.1397 | GE       | 159.0764        | 187.0713 |

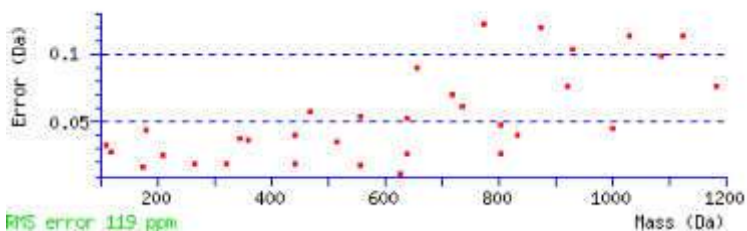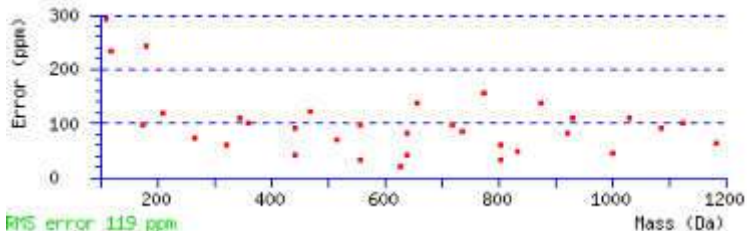

NCBI **BLAST** search of [AHGGFSVFAGVGER](#)  
 (Parameters: blastp, nr protein database, expect=20000, no filter, PAM30)  
 Other BLAST [web gateways](#)

**All matches to this query**

| Score | Mr(calc)  | Delta   | Sequence                       |
|-------|-----------|---------|--------------------------------|
| 101.0 | 1389.6790 | 0.0421  | <a href="#">AHGGFSVFAGVGER</a> |
| 85.1  | 1389.6790 | 0.0421  | <a href="#">QHGGFSVFAGVGER</a> |
| 82.5  | 1389.6790 | 0.0421  | <a href="#">AHGGYAVFAGVGER</a> |
| 45.6  | 1389.6459 | 0.0751  | <a href="#">AHGGYSVMAGVGER</a> |
| 40.6  | 1389.7405 | -0.0195 | <a href="#">AIFAGQFVDVPAR</a>  |

|      |           |         |                               |
|------|-----------|---------|-------------------------------|
| 36.9 | 1389.6922 | 0.0288  | <a href="#">ENILVSMGAVGER</a> |
| 31.6 | 1389.7075 | 0.0135  | <a href="#">MNDVPVFIVSNR</a>  |
| 31.2 | 1389.6381 | 0.0829  | <a href="#">CPADLAVMGVDAR</a> |
| 31.1 | 1389.7616 | -0.0406 | <a href="#">VITKVDFQVDAR</a>  |
| 30.8 | 1389.6790 | 0.0421  | <a href="#">GFPSAQTGQGVWR</a> |

**Mascot:** <http://www.matrixscience.com/>

**MATRIX SCIENCE Mascot Search Results**

**Peptide View Spot no 85**

**MS/MS Fragmentation of VLNTGSPITVPVGR**

Found in **gi3676294** in **NCBInr**, mitochondrial ATPase beta subunit [Nicotiana sylvestris]

Match to Query 204: 1408.845824 from(1409.853100,1+) intensity(0.0000) index(19)

Title: Label: F15, Spot\_Id: 219903, Peak\_List\_Id: 228322, MSMS Job\_Run\_Id: 21987, Comment:

Data file C:\Documents and Settings\Administrator\Desktop\Farah-Garima 11May 2013\ppw\_F15\_136868277600.txt

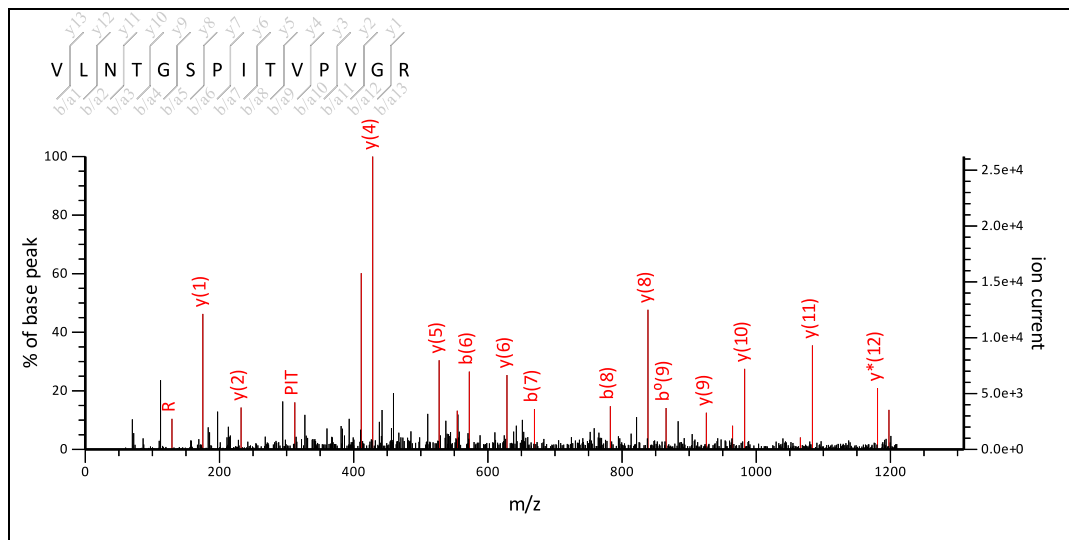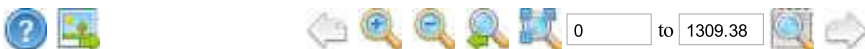

Label all possible matches  Label matches used for scoring

Monoisotopic mass of neutral peptide Mr(calc): 1408.8038

Fixed modifications: Carbamidomethyl (C) (apply to specified residues or termini only)

Ions Score: 98 Expect: 3.1e-06

Matches : 34/257 fragment ions using 24 most intense peaks (help)

| #  | Immon.   | a         | a*        | a <sup>0</sup> | b         | b*        | b <sup>0</sup> | d         | d'       | Seq. | v         | w         | w'        | y         | y*        |
|----|----------|-----------|-----------|----------------|-----------|-----------|----------------|-----------|----------|------|-----------|-----------|-----------|-----------|-----------|
| 1  | 72.0808  | 72.0808   |           |                | 100.0757  |           |                | 44.0495   |          | V    |           |           |           |           |           |
| 2  | 86.0964  | 185.1648  |           |                | 213.1598  |           |                | 143.1179  |          | L    | 1252.6644 | 1251.6692 |           | 1310.7427 | 1293.7161 |
| 3  | 87.0553  | 299.2078  | 282.1812  |                | 327.2027  | 310.1761  |                | 256.2020  |          | N    | 1138.6215 | 1137.6263 |           | 1197.6586 | 1180.6321 |
| 4  | 74.0600  | 400.2554  | 383.2289  | 382.2449       | 428.2504  | 411.2238  | 410.2398       | 384.2605  | 386.2398 | T    | 1037.5738 | 1050.5942 | 1052.5735 | 1083.6157 | 1066.5891 |
| 5  | 30.0338  | 457.2769  | 440.2504  | 439.2663       | 485.2718  | 468.2453  | 467.2613       |           |          | G    |           |           |           | 982.5680  | 965.5415  |
| 6  | 60.0444  | 544.3089  | 527.2824  | 526.2984       | 572.3039  | 555.2773  | 554.2933       | 528.3140  |          | S    | 893.5203  | 892.5251  |           | 925.5465  | 908.5200  |
| 7  | 70.0651  | 641.3617  | 624.3352  | 623.3511       | 669.3566  | 652.3301  | 651.3461       | 615.3461  |          | P    | 796.4676  | 795.4723  |           | 838.5145  | 821.4880  |
| 8  | 86.0964  | 754.4458  | 737.4192  | 736.4352       | 782.4407  | 765.4141  | 764.4301       | 726.4145  | 740.4301 | I    | 683.3835  | 696.4039  | 710.4196  | 741.4618  | 724.4352  |
| 9  | 74.0600  | 855.4934  | 838.4669  | 837.4829       | 883.4884  | 866.4618  | 865.4778       | 839.4985  | 841.4778 | T    | 582.3358  | 595.3562  | 597.3355  | 628.3777  | 611.3511  |
| 10 | 72.0808  | 954.5619  | 937.5353  | 936.5513       | 982.5568  | 965.5302  | 964.5462       | 940.5462  |          | V    | 483.2674  | 496.2878  |           | 527.3300  | 510.3035  |
| 11 | 70.0651  | 1051.6146 | 1034.5881 | 1033.6041      | 1079.6095 | 1062.5830 | 1061.5990      | 1025.5990 |          | P    | 386.2146  | 385.2194  |           | 428.2616  | 411.2350  |
| 12 | 72.0808  | 1150.6830 | 1133.6565 | 1132.6725      | 1178.6780 | 1161.6514 | 1160.6674      | 1136.6674 |          | V    | 287.1462  | 300.1666  |           | 331.2088  | 314.1823  |
| 13 | 30.0338  | 1207.7045 | 1190.6780 | 1189.6939      | 1235.6994 | 1218.6729 | 1217.6889      |           |          | G    |           |           |           | 232.1404  | 215.1139  |
| 14 | 129.1135 |           |           |                |           |           |                |           |          | R    | 74.0237   | 73.0284   |           | 175.1190  | 158.0924  |

| Seq   | ya       | yb       | Seq    | ya       | yb       | Seq     | ya       | yb       |
|-------|----------|----------|--------|----------|----------|---------|----------|----------|
| LN    | 200.1394 | 228.1343 | LNT    | 301.1870 | 329.1819 | LNTG    | 358.2085 | 386.2034 |
| LNTGS | 445.2405 | 473.2354 | LNTGSP | 542.2933 | 570.2882 | LNTGSPI | 655.3774 | 683.3723 |
| NT    | 188.1030 | 216.0979 | NTG    | 245.1244 | 273.1193 | NTGS    | 332.1565 | 360.1514 |
| NTGSP | 429.2092 | 457.2041 | NTGSPI | 542.2933 | 570.2882 | NTGSPIT | 643.3410 | 671.3359 |
| TG    | 131.0815 | 159.0764 | TGS    | 218.1135 | 246.1084 | TGSP    | 315.1663 | 343.1612 |
| TGSP  | 428.2504 | 456.2453 | TGSPIT | 529.2980 | 557.2930 | TGSPITV | 628.3665 | 656.3614 |
| GS    | 117.0659 | 145.0608 | GSP    | 214.1186 | 242.1135 | GSP     | 327.2027 | 355.1976 |



|              |                 |          |               |                 |                 |                |                 |                 |
|--------------|-----------------|----------|---------------|-----------------|-----------------|----------------|-----------------|-----------------|
| <b>GSPIT</b> | <b>428.2504</b> | 456.2453 | <b>GSPITV</b> | <b>527.3188</b> | 555.3137        | <b>GSPITVP</b> | 624.3715        | 652.3665        |
| <b>SP</b>    | 157.0972        | 185.0921 | <b>SPI</b>    | 270.1812        | 298.1761        | <b>SPIT</b>    | 371.2289        | 399.2238        |
| <b>SPITV</b> | 470.2973        | 498.2922 | <b>SPITVP</b> | 567.3501        | 595.3450        | <b>SPITVPV</b> | 666.4185        | 694.4134        |
| <b>PI</b>    | 183.1492        | 211.1441 | <b>PIT</b>    | 284.1969        | <b>312.1918</b> | <b>PITV</b>    | 383.2653        | <b>411.2602</b> |
| <b>PITVP</b> | 480.3180        | 508.3130 | <b>PITVPV</b> | 579.3865        | 607.3814        | <b>PITVPVG</b> | 636.4079        | 664.4028        |
| <b>IT</b>    | 187.1441        | 215.1390 | <b>ITV</b>    | 286.2125        | 314.2074        | <b>ITVP</b>    | 383.2653        | <b>411.2602</b> |
| <b>ITVPV</b> | 482.3337        | 510.3286 | <b>ITVPVG</b> | 539.3552        | 567.3501        | <b>TV</b>      | 173.1285        | 201.1234        |
| <b>TVP</b>   | 270.1812        | 298.1761 | <b>TVPV</b>   | 369.2496        | 397.2445        | <b>TVPVG</b>   | 426.2711        | 454.2660        |
| <b>VP</b>    | 169.1335        | 197.1285 | <b>VPV</b>    | 268.2020        | 296.1969        | <b>VPVG</b>    | 325.2234        | 353.2183        |
| <b>PV</b>    | 169.1335        | 197.1285 | <b>PVG</b>    | 226.1550        | 254.1499        | <b>VG</b>      | <b>129.1022</b> | 157.0972        |

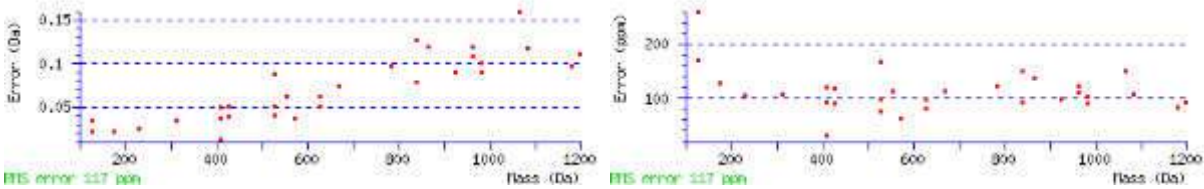

NCBI BLAST search of [VLNTGSPITVPVGR](#)  
 (Parameters: blastp, nr protein database, expect=20000, no filter, PAM30)  
 Other BLAST [web gateways](#)

All matches to this query

| Score | Mr(calc)  | Delta   | Sequence                        |
|-------|-----------|---------|---------------------------------|
| 97.7  | 1408.8038 | 0.0420  | <a href="#">VLNTGSPITVPVGR</a>  |
| 38.9  | 1408.8038 | 0.0420  | <a href="#">IAEGALTAALAVPGR</a> |
| 37.1  | 1408.7675 | 0.0784  | <a href="#">AVDTGQPITVPVGR</a>  |
| 36.5  | 1408.7463 | 0.0995  | <a href="#">GTNWLPLDALPGR</a>   |
| 34.5  | 1408.8038 | 0.0420  | <a href="#">LGEKGSPLISPGVR</a>  |
| 32.9  | 1408.7787 | 0.0672  | <a href="#">ATSAPVEARVPVGR</a>  |
| 31.8  | 1408.8402 | 0.0056  | <a href="#">RSIAGLALPLSVVN</a>  |
| 31.4  | 1408.8554 | -0.0096 | <a href="#">WLKSLQLVPGR</a>     |
| 30.7  | 1408.8263 | 0.0196  | <a href="#">TOPTATRLLRPR</a>    |
| 30.6  | 1408.8402 | 0.0056  | <a href="#">QLDALSPKVLGR</a>    |

Mascot: <http://www.matrixscience.com/>


**Mascot Search Results**
**Peptide View** **Spot no 85**
**MS/MS Fragmentation of FTQANSEVSALLGR**

 Found in **gi3676294** in **NCBInr**, mitochondrial ATPase beta subunit [Nicotiana sylvestris]

Match to Query 223: 1491.812224 from(1492.819500,1+) intensity(0.0000) index(22)

Title: Label: F15, Spot\_Id: 219903, Peak\_List\_Id: 228321, MSMS Job\_Run\_Id: 21987, Comment:

Data file C:\Documents and Settings\Administrator\Desktop\Farah-Garima 11May 2013\ppw\_F15\_136868277600.txt

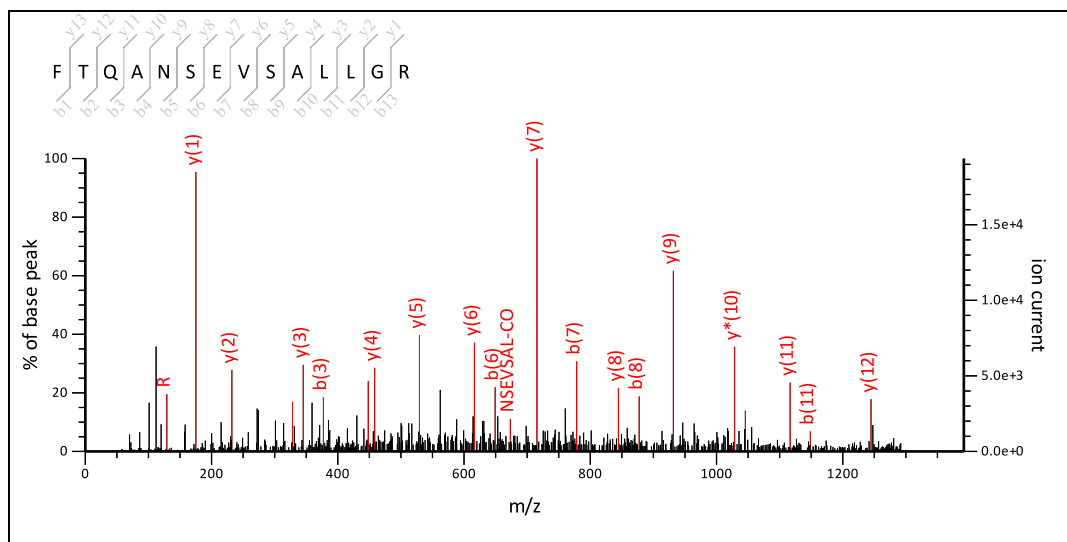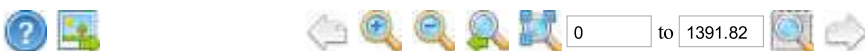
 Label all possible matches  Label matches used for scoring 

Monoisotopic mass of neutral peptide Mr(calc): 1491.7681

Fixed modifications: Carbamidomethyl (C) (apply to specified residues or termini only)

Ions Score: 123 Expect: 1.5e-08

 Matches : 23/251 fragment ions using 26 most intense peaks ([help](#))

| #  | Immon.          | a         | a*        | a <sup>0</sup> | b                | b*               | b <sup>0</sup> | d         | d'       | Seq. | v         | w         | w'        | y                | y*               |
|----|-----------------|-----------|-----------|----------------|------------------|------------------|----------------|-----------|----------|------|-----------|-----------|-----------|------------------|------------------|
| 1  | 120.0808        | 120.0808  |           |                | 148.0757         |                  |                | 44.0495   |          | F    |           |           |           |                  |                  |
| 2  | 74.0600         | 221.1285  |           | 203.1179       | 249.1234         |                  | 231.1128       | 205.1335  | 207.1128 | T    | 1299.6652 | 1312.6856 | 1314.6648 | 1345.7070        | 1328.6805        |
| 3  | 101.0709        | 349.1870  | 332.1605  | 331.1765       | <b>377.1819</b>  | 360.1554         | 359.1714       | 292.1656  |          | Q    | 1171.6066 | 1170.6113 |           | <b>1244.6593</b> | 1227.6328        |
| 4  | 44.0495         | 420.2241  | 403.1976  | 402.2136       | <b>448.2191</b>  | 431.1925         | 430.2085       |           |          | A    | 1100.5695 |           |           | <b>1116.6008</b> | 1099.5742        |
| 5  | 87.0553         | 534.2671  | 517.2405  | 516.2565       | 562.2620         | 545.2354         | 544.2514       | 491.2613  |          | N    | 986.5265  | 985.5313  |           | <b>1045.5636</b> | <b>1028.5371</b> |
| 6  | 60.0444         | 621.2991  | 604.2726  | 603.2885       | <b>649.2940</b>  | 632.2675         | 631.2835       | 605.3042  |          | S    | 899.4945  | 898.4993  |           | <b>931.5207</b>  | 914.4942         |
| 7  | 102.0550        | 750.3417  | 733.3151  | 732.3311       | <b>778.3366</b>  | 761.3101         | 760.3260       | 692.3362  |          | E    | 770.4519  | 769.4567  |           | <b>844.4887</b>  | 827.4621         |
| 8  | 72.0808         | 849.4101  | 832.3836  | 831.3995       | <b>877.4050</b>  | 860.3785         | 859.3945       | 835.3945  |          | V    | 671.3835  | 684.4039  |           | <b>715.4461</b>  | 698.4196         |
| 9  | 60.0444         | 936.4421  | 919.4156  | 918.4316       | 964.4371         | 947.4105         | 946.4265       | 920.4472  |          | S    | 584.3515  | 583.3562  |           | <b>616.3777</b>  | 599.3511         |
| 10 | 44.0495         | 1007.4792 | 990.4527  | 989.4687       | 1035.4742        | 1018.4476        | 1017.4636      |           |          | A    | 513.3144  |           |           | <b>529.3457</b>  | 512.3191         |
| 11 | 86.0964         | 1120.5633 | 1103.5368 | 1102.5527      | <b>1148.5582</b> | 1131.5317        | 1130.5477      | 1078.5164 |          | L    | 400.2303  | 399.2350  |           | <b>458.3085</b>  | 441.2820         |
| 12 | 86.0964         | 1233.6474 | 1216.6208 | 1215.6368      | 1261.6423        | <b>1244.6157</b> | 1243.6317      | 1191.6004 |          | L    | 287.1462  | 286.1510  |           | <b>345.2245</b>  | <b>328.1979</b>  |
| 13 | 30.0338         | 1290.6688 | 1273.6423 | 1272.6583      | 1318.6638        | 1301.6372        | 1300.6532      |           |          | G    |           |           |           | <b>232.1404</b>  | 215.1139         |
| 14 | <b>129.1135</b> |           |           |                |                  |                  |                |           |          | R    | 74.0237   | 73.0284   |           | <b>175.1190</b>  | 158.0924         |

| Seq    | ya       | yb       | Seq     | ya       | yb       | Seq   | ya       | yb       |
|--------|----------|----------|---------|----------|----------|-------|----------|----------|
| TQ     | 202.1186 | 230.1135 | TQA     | 273.1557 | 301.1506 | TQAN  | 387.1987 | 415.1936 |
| TQANS  | 474.2307 | 502.2256 | TQANSE  | 603.2733 | 631.2682 | QA    | 172.1081 | 200.1030 |
| QAN    | 286.1510 | 314.1459 | QANS    | 373.1830 | 401.1779 | QANSE | 502.2256 | 530.2205 |
| QANSEV | 601.2940 | 629.2889 | QANSEVS | 688.3260 | 716.3210 | AN    | 158.0924 | 186.0873 |
| ANS    | 245.1244 | 273.1193 | ANSE    | 374.1670 | 402.1619 | ANSEV | 473.2354 | 501.2304 |
| ANSEVS | 560.2675 | 588.2624 | ANSEVSA | 631.3046 | 659.2995 | NS    | 174.0873 | 202.0822 |
| NSE    | 303.1299 | 331.1248 | NSEV    | 402.1983 | 430.1932 | NSEVS | 489.2304 | 517.2253 |

|                        |          |          |                         |                          |          |                       |          |          |
|------------------------|----------|----------|-------------------------|--------------------------|----------|-----------------------|----------|----------|
| <a href="#">NSEVSA</a> | 560.2675 | 588.2624 | <a href="#">NSEVSAL</a> | <a href="#">673.3515</a> | 701.3464 | <a href="#">SE</a>    | 189.0870 | 217.0819 |
| <a href="#">SEV</a>    | 288.1554 | 316.1503 | <a href="#">SEVS</a>    | 375.1874                 | 403.1823 | <a href="#">SEVSA</a> | 446.2245 | 474.2195 |
| <a href="#">SEVSAL</a> | 559.3086 | 587.3035 | <a href="#">SEVSALL</a> | 672.3927                 | 700.3876 | <a href="#">EV</a>    | 201.1234 | 229.1183 |
| <a href="#">EVS</a>    | 288.1554 | 316.1503 | <a href="#">EVSA</a>    | 359.1925                 | 387.1874 | <a href="#">EVSAL</a> | 472.2766 | 500.2715 |
| <a href="#">EVSALL</a> | 585.3606 | 613.3556 | <a href="#">EVSALLG</a> | 642.3821                 | 670.3770 | <a href="#">VS</a>    | 159.1128 | 187.1077 |
| <a href="#">VSA</a>    | 230.1499 | 258.1448 | <a href="#">VSAL</a>    | 343.2340                 | 371.2289 | <a href="#">VSALL</a> | 456.3180 | 484.3130 |
| <a href="#">VSALLG</a> | 513.3395 | 541.3344 | <a href="#">SA</a>      | 131.0815                 | 159.0764 | <a href="#">SAL</a>   | 244.1656 | 272.1605 |
| <a href="#">SALL</a>   | 357.2496 | 385.2445 | <a href="#">SALLG</a>   | 414.2711                 | 442.2660 | <a href="#">AL</a>    | 157.1335 | 185.1285 |
| <a href="#">ALL</a>    | 270.2176 | 298.2125 | <a href="#">ALLG</a>    | 327.2391                 | 355.2340 | <a href="#">LL</a>    | 199.1805 | 227.1754 |
| <a href="#">LLG</a>    | 256.2020 | 284.1969 | <a href="#">LG</a>      | 143.1179                 | 171.1128 |                       |          |          |

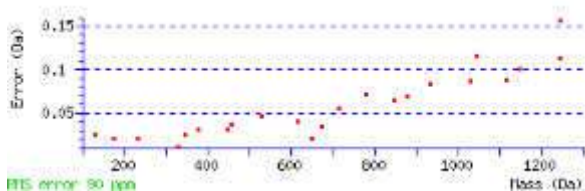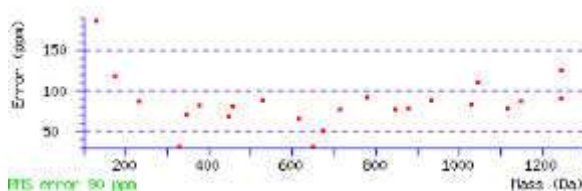

NCBI BLAST search of [FTOANSEVSALLGR](#)

(Parameters: blastp, nr protein database, expect=20000, no filter, PAM30)

Other BLAST [web gateways](#)

#### All matches to this query

| Score | Mr(calc)  | Delta   | Sequence                        |
|-------|-----------|---------|---------------------------------|
| 123.1 | 1491.7681 | 0.0441  | <a href="#">FTOANSEVSALLGR</a>  |
| 84.3  | 1491.7834 | 0.0288  | <a href="#">FTOAGSWVSALLGR</a>  |
| 48.3  | 1491.8297 | -0.0175 | <a href="#">YTLAVTEVSALLGR</a>  |
| 39.4  | 1491.6987 | 0.1135  | <a href="#">MEATAEEVDRAVR</a>   |
| 36.1  | 1491.7794 | 0.0329  | <a href="#">FTOAGSEISARLGR</a>  |
| 34.8  | 1491.7318 | 0.0805  | <a href="#">STSTAOSDWLAAVR</a>  |
| 34.7  | 1491.7529 | 0.0593  | <a href="#">ITGSGSLGATDSLGR</a> |
| 32.0  | 1491.7967 | 0.0155  | <a href="#">KTTGIDTSAAVVMK</a>  |
| 31.4  | 1491.7351 | 0.0771  | <a href="#">LAVSEAKGGSAMAER</a> |
| 31.0  | 1491.7100 | 0.1022  | <a href="#">VGETASRGMDNLAR</a>  |

Mascot: <http://www.matrixscience.com/>


**Mascot Search Results**
**Peptide View** **Spot no 85**
MS/MS Fragmentation of **CALVYQMNEPPGAR**Found in **gi|3676294** in **NCBI**nr, mitochondrial ATPase beta subunit [Nicotiana sylvestris]

Match to Query 235: 1661.814424 from(1662.821700,1+) intensity(0.0000) index(24)

Title: Label: F15, Spot\_Id: 219903, Peak\_List\_Id: 228325, MSMS Job\_Run\_Id: 21987, Comment:

Data file C:\Documents and Settings\Administrator\Desktop\Farah-Garima 11May 2013\ppw\_F15\_136868277600.txt

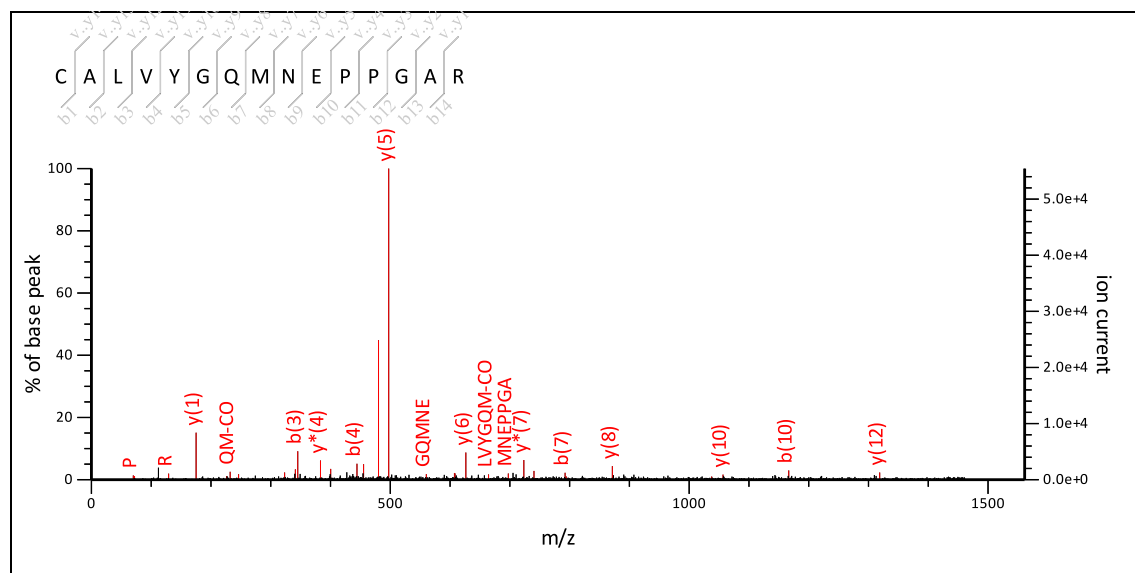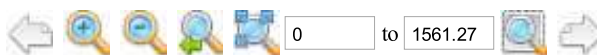Label all possible matches  Label matches used for scoring 

Monoisotopic mass of neutral peptide Mr(calc): 1661.7654

Fixed modifications: Carbamidomethyl (C) (apply to specified residues or termini only)

Ions Score: 59 Expect: 0.034

Matches : 40/237 fragment ions using 56 most intense peaks ([help](#))

| #  | Immon.   | a         | a*        | a <sup>0</sup> | b         | b*        | b <sup>0</sup> | d         | Seq. | v         | w         | y         | y*        | y <sup>0</sup> | #  |
|----|----------|-----------|-----------|----------------|-----------|-----------|----------------|-----------|------|-----------|-----------|-----------|-----------|----------------|----|
| 1  | 133.0430 | 133.0430  |           |                | 161.0379  |           |                | 44.0495   | C    |           |           |           |           |                | 15 |
| 2  | 44.0495  | 204.0801  |           |                | 232.0750  |           |                |           | A    | 1486.7107 |           | 1502.7420 | 1485.7155 | 1484.7315      | 14 |
| 3  | 86.0964  | 317.1642  |           |                | 345.1591  |           |                | 275.1172  | L    | 1373.6267 | 1372.6314 | 1431.7049 | 1414.6784 | 1413.6943      | 13 |
| 4  | 72.0808  | 416.2326  |           |                | 444.2275  |           |                | 402.2170  | V    | 1274.5582 | 1287.5786 | 1318.6208 | 1301.5943 | 1300.6103      | 12 |
| 5  | 136.0757 | 579.2959  |           |                | 607.2908  |           |                |           | Y    | 1111.4949 |           | 1219.5524 | 1202.5259 | 1201.5419      | 11 |
| 6  | 30.0338  | 636.3174  |           |                | 664.3123  |           |                |           | G    |           |           | 1056.4891 | 1039.4626 | 1038.4785      | 10 |
| 7  | 101.0709 | 764.3760  | 747.3494  |                | 792.3709  | 775.3443  |                | 707.3545  | Q    | 926.4149  | 925.4196  | 999.4676  | 982.4411  | 981.4571       | 9  |
| 8  | 104.0528 | 895.4165  | 878.3899  |                | 923.4114  | 906.3848  |                | 835.4131  | M    | 795.3744  | 794.3791  | 871.4091  | 854.3825  | 853.3985       | 8  |
| 9  | 87.0553  | 1009.4594 | 992.4328  |                | 1037.4543 | 1020.4278 |                | 966.4536  | N    | 681.3315  | 680.3362  | 740.3686  | 723.3420  | 722.3580       | 7  |
| 10 | 102.0550 | 1138.5020 | 1121.4754 | 1120.4914      | 1166.4969 | 1149.4703 | 1148.4863      | 1080.4965 | E    | 552.2889  | 551.2936  | 626.3257  | 609.2991  | 608.3151       | 6  |
| 11 | 70.0651  | 1235.5547 | 1218.5282 | 1217.5442      | 1263.5497 | 1246.5231 | 1245.5391      | 1209.5391 | P    | 455.2361  | 454.2409  | 497.2831  | 480.2565  |                | 5  |
| 12 | 70.0651  | 1332.6075 | 1315.5810 | 1314.5969      | 1360.6024 | 1343.5759 | 1342.5919      | 1306.5919 | P    | 358.1833  | 357.1881  | 400.2303  | 383.2037  |                | 4  |
| 13 | 30.0338  | 1389.6290 | 1372.6024 | 1371.6184      | 1417.6239 | 1400.5973 | 1399.6133      |           | G    |           |           | 303.1775  | 286.1510  |                | 3  |
| 14 | 44.0495  | 1460.6661 | 1443.6395 | 1442.6555      | 1488.6610 | 1471.6345 | 1470.6504      |           | A    | 230.1248  |           | 246.1561  | 229.1295  |                | 2  |
| 15 | 129.1135 |           |           |                |           |           |                |           | R    | 74.0237   | 73.0284   | 175.1190  | 158.0924  |                | 1  |

| Seq   | ya       | yb       | Seq    | ya       | yb       | Seq   | ya       | yb       |
|-------|----------|----------|--------|----------|----------|-------|----------|----------|
| AL    | 157.1335 | 185.1285 | ALV    | 256.2020 | 284.1969 | ALVY  | 419.2653 | 447.2602 |
| ALVYG | 476.2867 | 504.2817 | ALVYQG | 604.3453 | 632.3402 | LV    | 185.1648 | 213.1598 |
| LVY   | 348.2282 | 376.2231 | LVYG   | 405.2496 | 433.2445 | LVYQG | 533.3082 | 561.3031 |

|        |          |          |       |          |          |        |          |          |
|--------|----------|----------|-------|----------|----------|--------|----------|----------|
| LVIYQM | 664.3487 | 692.3436 | VY    | 235.1441 | 263.1390 | VYG    | 292.1656 | 320.1605 |
| VYQ    | 420.2241 | 448.2191 | VYQM  | 551.2646 | 579.2595 | VYQMNI | 665.3076 | 693.3025 |
| YG     | 193.0972 | 221.0921 | YQ    | 321.1557 | 349.1506 | YQM    | 452.1962 | 480.1911 |
| YQMNI  | 566.2391 | 594.2341 | YQMNI | 695.2817 | 723.2767 | GQ     | 158.0924 | 186.0873 |
| QMI    | 289.1329 | 317.1278 | QMI   | 403.1758 | 431.1707 | QMI    | 532.2184 | 560.2133 |
| QMI    | 629.2712 | 657.2661 | QMI   | 232.1114 | 260.1063 | QMI    | 346.1544 | 374.1493 |
| QMI    | 475.1969 | 503.1919 | QMI   | 572.2497 | 600.2446 | QMI    | 669.3025 | 697.2974 |
| MI     | 218.0958 | 246.0907 | MI    | 347.1384 | 375.1333 | MI     | 444.1911 | 472.1860 |
| MI     | 541.2439 | 569.2388 | MI    | 598.2654 | 626.2603 | MI     | 669.3025 | 697.2974 |
| NI     | 216.0979 | 244.0928 | NI    | 313.1506 | 341.1456 | NI     | 410.2034 | 438.1983 |
| NI     | 467.2249 | 495.2198 | NI    | 538.2620 | 566.2569 | NI     | 199.1077 | 227.1026 |
| PI     | 296.1605 | 324.1554 | PI    | 353.1819 | 381.1769 | PI     | 424.2191 | 452.2140 |
| PI     | 167.1179 | 195.1128 | PI    | 224.1394 | 252.1343 | PI     | 295.1765 | 323.1714 |
| PI     | 127.0866 | 155.0815 | PI    | 198.1237 | 226.1186 | PI     | 101.0709 | 129.0659 |

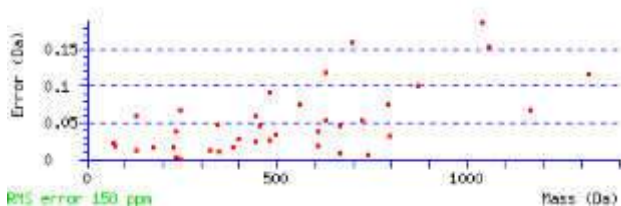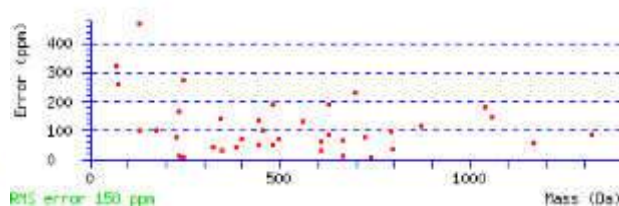

NCBI BLAST search of [CALVIYQMNEPPGAR](#)

(Parameters: blastp, nr protein database, expect=20000, no filter, PAM30)

Other BLAST [web gateways](#)

#### All matches to this query

| Score | Mr(calc)  | Delta   | Sequence                          |
|-------|-----------|---------|-----------------------------------|
| 67.3  | 1661.7654 | 0.0490  | <a href="#">ACLVIYQMNEPPGAR</a>   |
| 59.4  | 1661.7654 | 0.0490  | <a href="#">CALVIYQMNEPPGAR</a>   |
| 59.4  | 1661.7654 | 0.0490  | <a href="#">CALVIYQMNEPPGAR</a>   |
| 42.1  | 1661.7654 | 0.0490  | <a href="#">VALCYQMNEPPGAR</a>    |
| 42.1  | 1661.7654 | 0.0490  | <a href="#">VALCYQMNEPPGAR</a>    |
| 39.3  | 1661.7654 | 0.0490  | <a href="#">CSLVFGQMNEPPGAR</a>   |
| 29.6  | 1661.7654 | 0.0490  | <a href="#">CALVFGQMNEPPGAR</a>   |
| 28.9  | 1661.8737 | -0.0592 | <a href="#">OPGDGELKVIIEPAPGR</a> |
| 27.3  | 1661.8373 | -0.0229 | <a href="#">OPGDGELNIIIEPAPGR</a> |
| 26.1  | 1661.9213 | -0.1068 | <a href="#">OPKGSQLLAAAPSPAAR</a> |

Mascot: <http://www.matrixscience.com/>

**MATRIX SCIENCE Mascot Search Results**

**Peptide View Spot no 85**

MS/MS Fragmentation of **CALVYQMNEPPGAR**

Found in **gi3676294** in **NCBI**nr, mitochondrial ATPase beta subunit [Nicotiana sylvestris]

Match to Query 238: 1677.802324 from(1678.809600,1+) intensity(0.0000) index(25)

Title: Label: F15, Spot\_Id: 219903, Peak\_List\_Id: 228336, MSMS Job\_Run\_Id: 21987, Comment:

Data file C:\Documents and Settings\Administrator\Desktop\Farah-Garima 11May 2013\ppw\_F15\_136868277600.txt

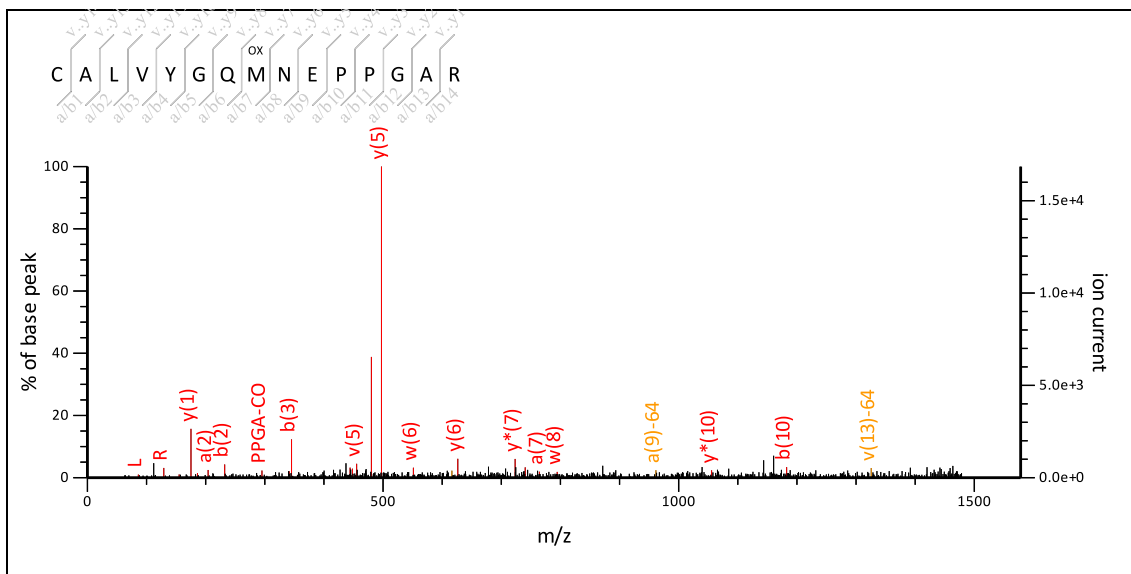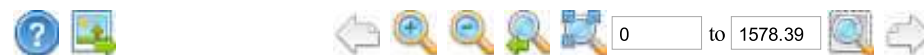

Label all possible matches  Label matches used for scoring

**Monoisotopic mass of neutral peptide Mr(calc):** 1677.7603

**Fixed modifications:** Carbamidomethyl (C) (apply to specified residues or termini only)

**Variable modifications:**

**M8** : Oxidation (M), with neutral losses 0.0000 (shown in table), 63.9983

**Ions Score:** 13 **Expect:** 1.3e+03

**Matches** : 29/340 fragment ions using 60 most intense peaks ([help](#))

| #  | Immon.          | a               | a*        | a <sup>0</sup> | b                | b*        | b <sup>0</sup> | d         | Seq. | v               | w               | y               | y*               | y <sup>0</sup> | #  |
|----|-----------------|-----------------|-----------|----------------|------------------|-----------|----------------|-----------|------|-----------------|-----------------|-----------------|------------------|----------------|----|
| 1  | 133.0430        | 133.0430        |           |                | 161.0379         |           |                | 44.0495   | C    |                 |                 |                 |                  |                | 15 |
| 2  | 44.0495         | <b>204.0801</b> |           |                | <b>232.0750</b>  |           |                |           | A    | 1502.7056       |                 | 1518.7369       | 1501.7104        | 1500.7264      | 14 |
| 3  | <b>86.0964</b>  | 317.1642        |           |                | <b>345.1591</b>  |           |                | 275.1172  | L    | 1389.6216       | 1388.6263       | 1447.6998       | 1430.6733        | 1429.6893      | 13 |
| 4  | 72.0808         | 416.2326        |           |                | <b>444.2275</b>  |           |                | 402.2170  | V    | 1290.5532       | 1303.5736       | 1334.6158       | 1317.5892        | 1316.6052      | 12 |
| 5  | 136.0757        | 579.2959        |           |                | 607.2908         |           |                |           | Y    | 1127.4898       |                 | 1235.5473       | 1218.5208        | 1217.5368      | 11 |
| 6  | 30.0338         | 636.3174        |           |                | 664.3123         |           |                |           | G    |                 |                 | 1072.4840       | <b>1055.4575</b> | 1054.4735      | 10 |
| 7  | 101.0709        | <b>764.3760</b> | 747.3494  |                | 792.3709         | 775.3443  |                | 707.3545  | Q    | 942.4098        | 941.4145        | 1015.4626       | 998.4360         | 997.4520       | 9  |
| 8  | 120.0478        | 911.4114        | 894.3848  |                | 939.4063         | 922.3797  |                | 835.4131  | M    | 795.3744        | <b>794.3791</b> | 887.4040        | 870.3774         | 869.3934       | 8  |
| 9  | 87.0553         | 1025.4543       | 1008.4278 |                | 1053.4492        | 1036.4227 |                | 982.4485  | N    | 681.3315        | 680.3362        | <b>740.3686</b> | <b>723.3420</b>  | 722.3580       | 7  |
| 10 | 102.0550        | 1154.4969       | 1137.4703 | 1136.4863      | <b>1182.4918</b> | 1165.4653 | 1164.4812      | 1096.4914 | E    | 552.2889        | <b>551.2936</b> | <b>626.3257</b> | 609.2991         | 608.3151       | 6  |
| 11 | 70.0651         | 1251.5497       | 1234.5231 | 1233.5391      | 1279.5446        | 1262.5180 | 1261.5340      | 1225.5340 | P    | <b>455.2361</b> | 454.2409        | <b>497.2831</b> | <b>480.2565</b>  |                | 5  |
| 12 | 70.0651         | 1348.6024       | 1331.5759 | 1330.5919      | 1376.5973        | 1359.5708 | 1358.5868      | 1322.5868 | P    | 358.1833        | 357.1881        | 400.2303        | 383.2037         |                | 4  |
| 13 | 30.0338         | 1405.6239       | 1388.5973 | 1387.6133      | 1433.6188        | 1416.5923 | 1415.6082      |           | G    |                 |                 | 303.1775        | 286.1510         |                | 3  |
| 14 | 44.0495         | 1476.6610       | 1459.6345 | 1458.6504      | 1504.6559        | 1487.6294 | 1486.6453      |           | A    | 230.1248        |                 | 246.1561        | 229.1295         |                | 2  |
| 15 | <b>129.1135</b> |                 |           |                |                  |           |                |           | R    | 74.0237         | 73.0284         | <b>175.1190</b> | 158.0924         |                | 1  |

| Seq | ya | yb | Seq | ya | yb | Seq | ya | yb |
|-----|----|----|-----|----|----|-----|----|----|
|     |    |    |     |    |    |     |    |    |

|        |          |          |         |          |          |        |          |          |
|--------|----------|----------|---------|----------|----------|--------|----------|----------|
| AL     | 157.1335 | 185.1285 | ALV     | 256.2020 | 284.1969 | ALVY   | 419.2653 | 447.2602 |
| ALVYG  | 476.2867 | 504.2817 | ALVYGQ  | 604.3453 | 632.3402 | LV     | 185.1648 | 213.1598 |
| LVY    | 348.2282 | 376.2231 | LVYG    | 405.2496 | 433.2445 | LVYGQ  | 533.3082 | 561.3031 |
| LVYGM  | 680.3436 | 708.3385 | VY      | 235.1441 | 263.1390 | VYG    | 292.1656 | 320.1605 |
| VYGQ   | 420.2241 | 448.2191 | VYGM    | 567.2595 | 595.2545 | VYGMN  | 681.3025 | 709.2974 |
| YG     | 193.0972 | 221.0921 | YGQ     | 321.1557 | 349.1506 | YGM    | 468.1911 | 496.1860 |
| YGMN   | 582.2341 | 610.2290 | GQ      | 158.0924 | 186.0873 | GQM    | 305.1278 | 333.1227 |
| GQM    | 419.1707 | 447.1656 | GQMNE   | 548.2133 | 576.2082 | GQMNEP | 645.2661 | 673.2610 |
| QM     | 248.1063 | 276.1013 | QMN     | 362.1493 | 390.1442 | QMNE   | 491.1919 | 519.1868 |
| QMNEP  | 588.2446 | 616.2395 | QMNEPP  | 685.2974 | 713.2923 | MN     | 234.0907 | 262.0856 |
| MNE    | 363.1333 | 391.1282 | MNEP    | 460.1860 | 488.1810 | MNEPP  | 557.2388 | 585.2337 |
| MNEPPG | 614.2603 | 642.2552 | MNEPPGA | 685.2974 | 713.2923 | NE     | 216.0979 | 244.0928 |
| NEP    | 313.1506 | 341.1456 | NEPP    | 410.2034 | 438.1983 | NEPPG  | 467.2249 | 495.2198 |
| NEPPGA | 538.2620 | 566.2569 | EP      | 199.1077 | 227.1026 | EPP    | 296.1605 | 324.1554 |
| EPPG   | 353.1819 | 381.1769 | EPPGA   | 424.2191 | 452.2140 | PP     | 167.1179 | 195.1128 |
| PPG    | 224.1394 | 252.1343 | PPGA    | 295.1765 | 323.1714 | PG     | 127.0866 | 155.0815 |
| PGA    | 198.1237 | 226.1186 | GA      | 101.0709 | 129.0659 |        |          |          |

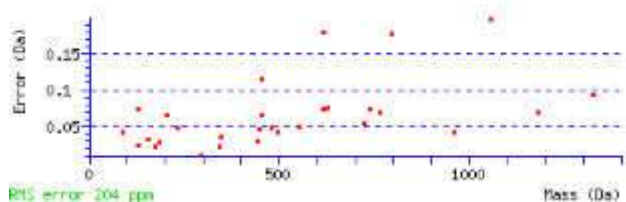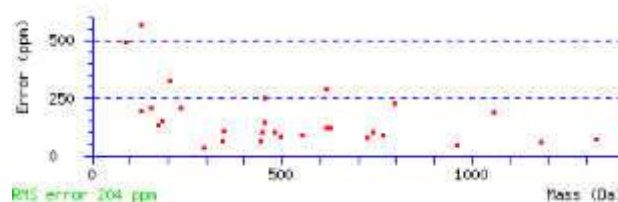

NCBI BLAST search of [CALVYGMNEPPGAR](#)

(Parameters: blastp, nr protein database, expect=20000, no filter, PAM30)

Other BLAST [web gateways](#)

#### All matches to this query

| Score | Mr(calc)  | Delta   | Sequence                         |
|-------|-----------|---------|----------------------------------|
| 15.3  | 1677.8951 | -0.0927 | <a href="#">AAERPEPGIPTAKWR</a>  |
| 14.8  | 1677.8760 | -0.0737 | <a href="#">TTMFSSDLPLPKIGR</a>  |
| 14.3  | 1677.8694 | -0.0671 | <a href="#">MAAQKAQFPALMAR</a>   |
| 14.3  | 1677.9678 | -0.1655 | <a href="#">QALKLPYAALLHQR</a>   |
| 14.2  | 1677.8911 | -0.0887 | <a href="#">TNALPERATVTVNHR</a>  |
| 14.1  | 1677.7087 | 0.0936  | <a href="#">SMPSSSSEPTVHGGR</a>  |
| 13.7  | 1677.9050 | -0.1026 | <a href="#">TATAVPLPEDPAKNVR</a> |
| 13.5  | 1677.7603 | 0.0420  | <a href="#">ACLVYGMNEPPGAR</a>   |
| 13.5  | 1677.7603 | 0.0420  | <a href="#">CALVYGMNEPPGAR</a>   |
| 13.5  | 1677.7603 | 0.0420  | <a href="#">CALVYGMNEPPGAR</a>   |

Mascot: <http://www.matrixscience.com/>



**MATRIX SCIENCE Mascot Search Results**

**Peptide View Spot no 85**

MS/MS Fragmentation of **QISELGIYPVDPLDSTSR**

Found in **gi3676294** in **NCBI nr**, mitochondrial ATPase beta subunit [Nicotiana sylvestris]

Match to Query 260: 2060.106524 from(2061.113800,1+) intensity(0.0000) index(31)

Title: Label: F15, Spot\_Id: 219903, Peak\_List\_Id: 228327, MSMS Job\_Run\_Id: 21987, Comment:

Data file C:\Documents and Settings\Administrator\Desktop\Farah-Garima 11May 2013\ppw\_F15\_136868277600.txt

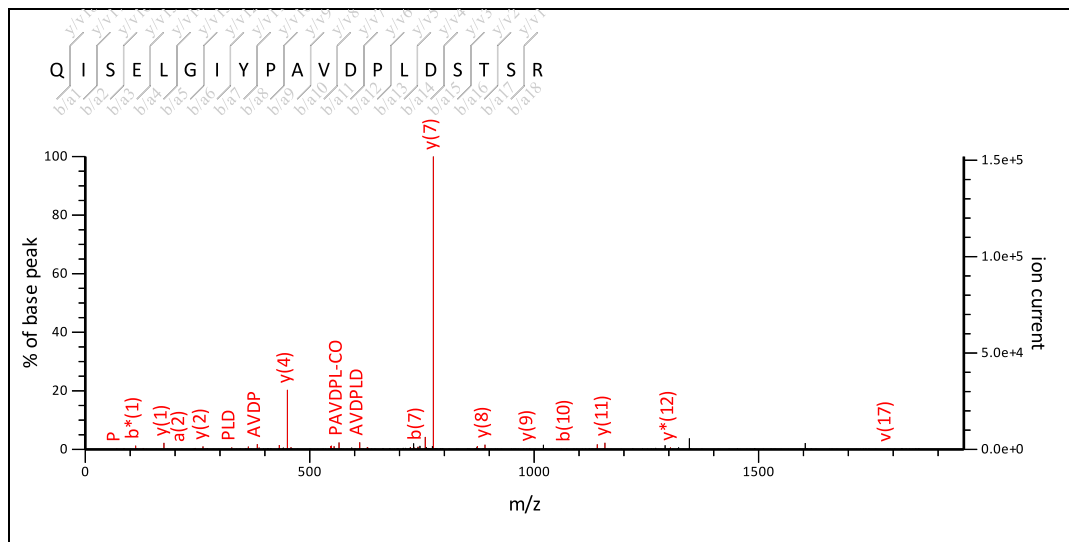

Navigation icons: Home, Back, Forward, Search, etc. Search range: 0 to 1957.3

Label all possible matches  Label matches used for scoring

Monoisotopic mass of neutral peptide Mr(calc): 2060.0426

Fixed modifications: Carbamidomethyl (C) (apply to specified residues or termini only)

Ions Score: 53 Expect: 0.11

Matches : 58/375 fragment ions using 92 most intense peaks [\(help\)](#)

| #  | Immon.   | a         | a*        | a <sup>0</sup> | b         | b*        | b <sup>0</sup> | d         | d'        | Seq. | v         | w         | w'        | y         | y*        |
|----|----------|-----------|-----------|----------------|-----------|-----------|----------------|-----------|-----------|------|-----------|-----------|-----------|-----------|-----------|
| 1  | 101.0709 | 101.0709  | 84.0444   |                | 129.0659  | 112.0393  |                | 44.0495   |           | Q    |           |           |           |           |           |
| 2  | 86.0964  | 214.1550  | 197.1285  |                | 242.1499  | 225.1234  |                | 186.1237  | 200.1394  | I    | 1874.9130 | 1887.9335 | 1901.9491 | 1932.9913 | 1915.9648 |
| 3  | 60.0444  | 301.1870  | 284.1605  | 283.1765       | 329.1819  | 312.1554  | 311.1714       | 285.1921  |           | S    | 1787.8810 | 1786.8858 |           | 1819.9072 | 1802.8807 |
| 4  | 102.0550 | 430.2296  | 413.2031  | 412.2191       | 458.2245  | 441.1980  | 440.2140       | 372.2241  |           | E    | 1658.8384 | 1657.8432 |           | 1732.8752 | 1715.8487 |
| 5  | 86.0964  | 543.3137  | 526.2871  | 525.3031       | 571.3086  | 554.2821  | 553.2980       | 501.2667  |           | L    | 1545.7544 | 1544.7591 |           | 1603.8326 | 1586.8061 |
| 6  | 30.0338  | 600.3352  | 583.3086  | 582.3246       | 628.3301  | 611.3035  | 610.3195       |           |           | G    |           |           |           | 1490.7486 | 1473.7220 |
| 7  | 86.0964  | 713.4192  | 696.3927  | 695.4087       | 741.4141  | 724.3876  | 723.4036       | 685.3879  | 699.4036  | I    | 1375.6488 | 1388.6692 | 1402.6849 | 1433.7271 | 1416.7005 |
| 8  | 136.0757 | 876.4825  | 859.4560  | 858.4720       | 904.4775  | 887.4509  | 886.4669       |           |           | Y    | 1212.5855 |           |           | 1320.6430 | 1303.6165 |
| 9  | 70.0651  | 973.5353  | 956.5088  | 955.5247       | 1001.5302 | 984.5037  | 983.5197       | 947.5197  |           | P    | 1115.5327 | 1114.5375 |           | 1157.5797 | 1140.5531 |
| 10 | 44.0495  | 1044.5724 | 1027.5459 | 1026.5619      | 1072.5673 | 1055.5408 | 1054.5568      |           |           | A    | 1044.4956 |           |           | 1060.5269 | 1043.5004 |
| 11 | 72.0808  | 1143.6408 | 1126.6143 | 1125.6303      | 1171.6358 | 1154.6092 | 1153.6252      | 1129.6252 |           | V    | 945.4272  | 958.4476  |           | 989.4898  | 972.4633  |
| 12 | 88.0393  | 1258.6678 | 1241.6412 | 1240.6572      | 1286.6627 | 1269.6361 | 1268.6521      | 1214.6780 |           | D    | 830.4003  | 829.4050  |           | 890.4214  | 873.3949  |
| 13 | 70.0651  | 1355.7205 | 1338.6940 | 1337.7100      | 1383.7155 | 1366.6889 | 1365.7049      | 1329.7049 |           | P    | 733.3475  | 732.3523  |           | 775.3945  | 758.3679  |
| 14 | 86.0964  | 1468.8046 | 1451.7781 | 1450.7940      | 1496.7995 | 1479.7730 | 1478.7890      | 1426.7577 |           | L    | 620.2634  | 619.2682  |           | 678.3417  | 661.3151  |
| 15 | 88.0393  | 1583.8316 | 1566.8050 | 1565.8210      | 1611.8265 | 1594.7999 | 1593.8159      | 1539.8417 |           | D    | 505.2365  | 504.2413  |           | 565.2576  | 548.2311  |
| 16 | 60.0444  | 1670.8636 | 1653.8370 | 1652.8530      | 1698.8585 | 1681.8319 | 1680.8479      | 1654.8687 |           | S    | 418.2045  | 417.2092  |           | 450.2307  | 433.2041  |
| 17 | 74.0600  | 1771.9113 | 1754.8847 | 1753.9007      | 1799.9062 | 1782.8796 | 1781.8956      | 1755.9163 | 1757.8956 | T    | 317.1568  | 330.1772  | 332.1565  | 363.1987  | 346.1721  |
| 18 | 60.0444  | 1858.9433 | 1841.9167 | 1840.9327      | 1886.9382 | 1869.9117 | 1868.9276      | 1842.9484 |           | S    | 230.1248  | 229.1295  |           | 262.1510  | 245.1244  |
| 19 | 129.1135 |           |           |                |           |           |                |           |           | R    | 74.0237   | 73.0284   |           | 175.1190  | 158.0924  |

| Seq   | ya       | yb       | Seq    | ya       | yb       | Seq  | ya       | yb       |
|-------|----------|----------|--------|----------|----------|------|----------|----------|
| IS    | 173.1285 | 201.1234 | ISE    | 302.1710 | 330.1660 | ISEL | 415.2551 | 443.2500 |
| ISELG | 472.2766 | 500.2715 | ISELGI | 585.3606 | 613.3556 | SE   | 189.0870 | 217.0819 |

|                         |                          |                          |                        |                          |                          |                         |                          |                          |
|-------------------------|--------------------------|--------------------------|------------------------|--------------------------|--------------------------|-------------------------|--------------------------|--------------------------|
| <a href="#">SEL</a>     | 302.1710                 | 330.1660                 | <a href="#">SELG</a>   | 359.1925                 | <a href="#">387.1874</a> | <a href="#">SELGI</a>   | 472.2766                 | 500.2715                 |
| <a href="#">SELGIY</a>  | 635.3399                 | 663.3348                 | <a href="#">EL</a>     | 215.1390                 | 243.1339                 | <a href="#">ELG</a>     | <a href="#">272.1605</a> | 300.1554                 |
| <a href="#">ELGI</a>    | 385.2445                 | 413.2395                 | <a href="#">ELGIY</a>  | <a href="#">548.3079</a> | 576.3028                 | <a href="#">ELGIYP</a>  | 645.3606                 | 673.3556                 |
| <a href="#">LG</a>      | 143.1179                 | 171.1128                 | <a href="#">LGI</a>    | 256.2020                 | 284.1969                 | <a href="#">LGIY</a>    | 419.2653                 | 447.2602                 |
| <a href="#">LGIYP</a>   | 516.3180                 | 544.3130                 | <a href="#">LGIYPA</a> | 587.3552                 | 615.3501                 | <a href="#">LGIYPAV</a> | 686.4236                 | 714.4185                 |
| <a href="#">GI</a>      | 143.1179                 | 171.1128                 | <a href="#">GIY</a>    | 306.1812                 | 334.1761                 | <a href="#">GIYP</a>    | 403.2340                 | 431.2289                 |
| <a href="#">GIYPA</a>   | 474.2711                 | 502.2660                 | <a href="#">GIYPAV</a> | 573.3395                 | 601.3344                 | <a href="#">GIYPAVD</a> | 688.3665                 | 716.3614                 |
| <a href="#">IY</a>      | 249.1598                 | 277.1547                 | <a href="#">IYP</a>    | 346.2125                 | 374.2074                 | <a href="#">IYPA</a>    | 417.2496                 | 445.2445                 |
| <a href="#">IYPAV</a>   | 516.3180                 | 544.3130                 | <a href="#">IYPAVD</a> | 631.3450                 | 659.3399                 | <a href="#">YP</a>      | 233.1285                 | 261.1234                 |
| <a href="#">YPA</a>     | 304.1656                 | 332.1605                 | <a href="#">YPAV</a>   | 403.2340                 | 431.2289                 | <a href="#">YPAVD</a>   | 518.2609                 | <a href="#">546.2558</a> |
| <a href="#">YPAVDP</a>  | 615.3137                 | 643.3086                 | <a href="#">PA</a>     | 141.1022                 | 169.0972                 | <a href="#">PAV</a>     | 240.1707                 | <a href="#">268.1656</a> |
| <a href="#">PAVD</a>    | 355.1976                 | <a href="#">383.1925</a> | <a href="#">PAVDP</a>  | 452.2504                 | 480.2453                 | <a href="#">PAVDPL</a>  | <a href="#">565.3344</a> | <a href="#">593.3293</a> |
| <a href="#">PAVDPLD</a> | 680.3614                 | 708.3563                 | <a href="#">AV</a>     | 143.1179                 | 171.1128                 | <a href="#">AVD</a>     | 258.1448                 | 286.1397                 |
| <a href="#">AVDP</a>    | 355.1976                 | <a href="#">383.1925</a> | <a href="#">AVDPL</a>  | 468.2817                 | 496.2766                 | <a href="#">AVDPLD</a>  | 583.3086                 | <a href="#">611.3035</a> |
| <a href="#">AVDPLDS</a> | 670.3406                 | 698.3355                 | <a href="#">VD</a>     | 187.1077                 | 215.1026                 | <a href="#">VDP</a>     | 284.1605                 | 312.1554                 |
| <a href="#">VDPL</a>    | 397.2445                 | 425.2395                 | <a href="#">VDPLD</a>  | 512.2715                 | 540.2664                 | <a href="#">VDPLDS</a>  | 599.3035                 | 627.2984                 |
| <a href="#">DP</a>      | 185.0921                 | 213.0870                 | <a href="#">DPL</a>    | 298.1761                 | <a href="#">326.1710</a> | <a href="#">DPLD</a>    | 413.2031                 | 441.1980                 |
| <a href="#">DPLDS</a>   | 500.2351                 | 528.2300                 | <a href="#">DPLDST</a> | 601.2828                 | <a href="#">629.2777</a> | <a href="#">DPLDSTS</a> | 688.3148                 | 716.3097                 |
| <a href="#">PL</a>      | 183.1492                 | 211.1441                 | <a href="#">PLD</a>    | 298.1761                 | <a href="#">326.1710</a> | <a href="#">PLDS</a>    | 385.2082                 | 413.2031                 |
| <a href="#">PLDST</a>   | 486.2558                 | 514.2508                 | <a href="#">PLDSTS</a> | 573.2879                 | 601.2828                 | <a href="#">LD</a>      | 201.1234                 | 229.1183                 |
| <a href="#">LDS</a>     | 288.1554                 | 316.1503                 | <a href="#">LDST</a>   | 389.2031                 | 417.1980                 | <a href="#">LDSTS</a>   | 476.2351                 | 504.2300                 |
| <a href="#">DS</a>      | <a href="#">175.0713</a> | 203.0662                 | <a href="#">DST</a>    | 276.1190                 | 304.1139                 | <a href="#">DSTS</a>    | <a href="#">363.1510</a> | 391.1460                 |
| <a href="#">ST</a>      | 161.0921                 | 189.0870                 | <a href="#">STS</a>    | 248.1241                 | 276.1190                 | <a href="#">TS</a>      | 161.0921                 | 189.0870                 |

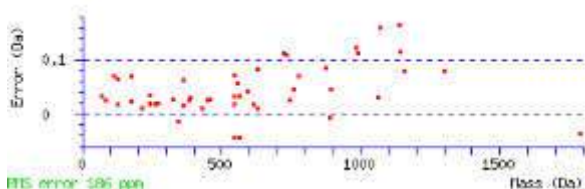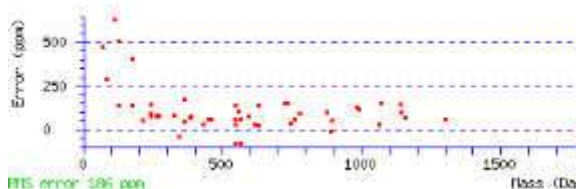

NCBI **BLAST** search of [QISELGIYPAVDPLDSTSR](#)  
 (Parameters: blastp, nr protein database, expect=20000, no filter, PAM30)  
 Other BLAST [web gateways](#)

All matches to this query

| Score | Mr(calc)  | Delta  | Sequence                             |
|-------|-----------|--------|--------------------------------------|
| 53.3  | 2060.0790 | 0.0276 | <a href="#">KISELGIYPAVDPLDSTSR</a>  |
| 53.3  | 2060.0426 | 0.0639 | <a href="#">QISELGIYPAVDPLDSTSR</a>  |
| 38.8  | 2060.0426 | 0.0640 | <a href="#">QISELGIYPAVDPLESSSR</a>  |
| 26.9  | 2060.0208 | 0.0857 | <a href="#">LINLMDGDIIVDSQAGLGSR</a> |
| 26.1  | 2060.0426 | 0.0639 | <a href="#">QIAELGIYPSVDPLDSTSR</a>  |
| 16.7  | 2060.0902 | 0.0163 | <a href="#">ISDGVHIALEPDGTLASPR</a>  |
| 13.0  | 2060.0724 | 0.0341 | <a href="#">IDAIYDRAALIALPDOMR</a>   |
| 12.9  | 2060.0071 | 0.0994 | <a href="#">MTNPPVFDVPALLEQMSR</a>   |
| 12.7  | 2060.0224 | 0.0842 | <a href="#">FLPFNKGGVDMFMSILGR</a>   |
| 12.7  | 2060.0579 | 0.0486 | <a href="#">DTSGPLVDGFLAISWVDLR</a>  |

Mascot: <http://www.matrixscience.com/>

**MATRIX SCIENCE Mascot Search Results**

**Peptide View Spot no 85**

MS/MS Fragmentation of **EAPAFVEQATEQQIIVTGIK**

Found in **gi3676294** in **NCBI nr**, mitochondrial ATPase beta subunit [Nicotiana sylvestris]

Match to Query 263: 2171.210724 from(2172.218000,1+) intensity(0.0000) index(32)

Title: Label: F15, Spot\_Id: 219903, Peak\_List\_Id: 228335, MSMS Job\_Run\_Id: 21987, Comment:

Data file C:\Documents and Settings\Administrator\Desktop\Farah-Garima 11May 2013\ppw\_F15\_136868277600.txt

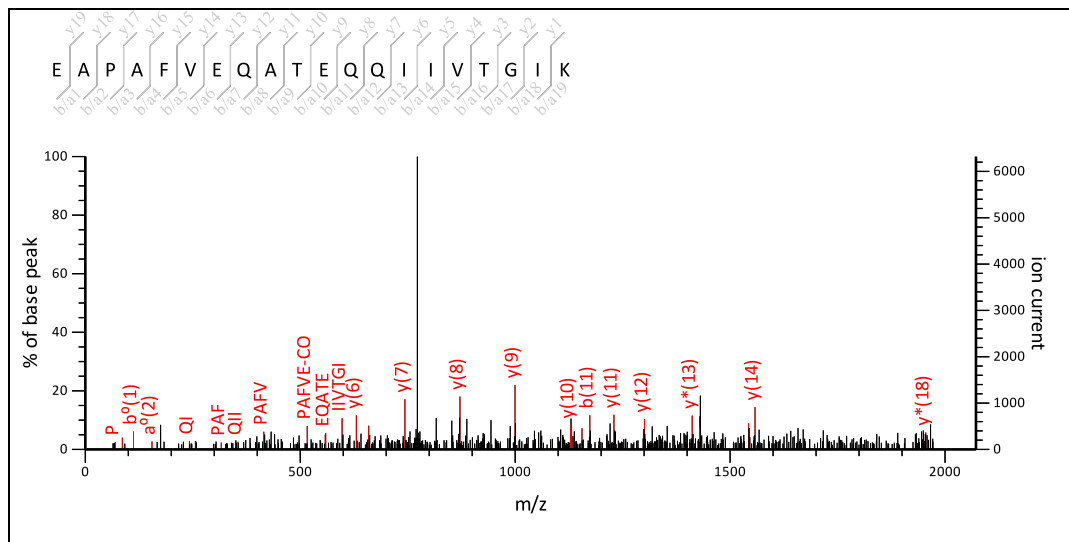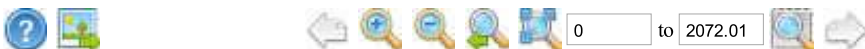

Label all possible matches  Label matches used for scoring

Monoisotopic mass of neutral peptide Mr(calc): 2171.1474

Fixed modifications: Carbamidomethyl (C) (apply to specified residues or termini only)

Ions Score: 30 Expect: 23

Matches : 38/379 fragment ions using 79 most intense peaks [\(help\)](#)

| #  | Immon.   | a         | a*        | a <sup>0</sup> | b         | b*        | b <sup>0</sup> | d         | d'        | Seq. | v         | w         | w'        | y         | y*        |
|----|----------|-----------|-----------|----------------|-----------|-----------|----------------|-----------|-----------|------|-----------|-----------|-----------|-----------|-----------|
| 1  | 102.0550 | 102.0550  |           | 84.0444        | 130.0499  |           | 112.0393       | 44.0495   |           | E    |           |           |           |           |           |
| 2  | 44.0495  | 173.0921  |           | 155.0815       | 201.0870  |           | 183.0764       |           |           | A    | 2027.0808 |           |           | 2043.1121 | 2026.0855 |
| 3  | 70.0651  | 270.1448  |           | 252.1343       | 298.1397  |           | 280.1292       | 244.1292  |           | P    | 1930.0280 | 1929.0328 |           | 1972.0750 | 1955.0484 |
| 4  | 44.0495  | 341.1819  |           | 323.1714       | 369.1769  |           | 351.1663       |           |           | A    | 1858.9909 |           |           | 1875.0222 | 1857.9957 |
| 5  | 120.0808 | 488.2504  |           | 470.2398       | 516.2453  |           | 498.2347       |           |           | F    | 1711.9225 |           |           | 1803.9851 | 1786.9585 |
| 6  | 72.0808  | 587.3188  |           | 569.3082       | 615.3137  |           | 597.3031       | 573.3031  |           | V    | 1612.8541 | 1625.8745 |           | 1656.9167 | 1639.8901 |
| 7  | 102.0550 | 716.3614  |           | 698.3508       | 744.3563  |           | 726.3457       | 658.3559  |           | E    | 1483.8115 | 1482.8162 |           | 1557.8483 | 1540.8217 |
| 8  | 101.0709 | 844.4199  | 827.3934  | 826.4094       | 872.4149  | 855.3883  | 854.4043       | 787.3985  |           | Q    | 1355.7529 | 1354.7577 |           | 1428.8057 | 1411.7791 |
| 9  | 44.0495  | 915.4571  | 898.4305  | 897.4465       | 943.4520  | 926.4254  | 925.4414       |           |           | A    | 1284.7158 |           |           | 1300.7471 | 1283.7205 |
| 10 | 74.0600  | 1016.5047 | 999.4782  | 998.4942       | 1044.4997 | 1027.4731 | 1026.4891      | 1000.5098 | 1002.4891 | T    | 1183.6681 | 1196.6885 | 1198.6678 | 1229.7100 | 1212.6834 |
| 11 | 102.0550 | 1145.5473 | 1128.5208 | 1127.5368      | 1173.5422 | 1156.5157 | 1155.5317      | 1087.5419 |           | E    | 1054.6255 | 1053.6303 |           | 1128.6623 | 1111.6358 |
| 12 | 101.0709 | 1273.6059 | 1256.5794 | 1255.5953      | 1301.6008 | 1284.5743 | 1283.5903      | 1216.5844 |           | Q    | 926.5669  | 925.5717  |           | 999.6197  | 982.5932  |
| 13 | 101.0709 | 1401.6645 | 1384.6379 | 1383.6539      | 1429.6594 | 1412.6329 | 1411.6488      | 1344.6430 |           | Q    | 798.5084  | 797.5131  |           | 871.5611  | 854.5346  |
| 14 | 86.0964  | 1514.7486 | 1497.7220 | 1496.7380      | 1542.7435 | 1525.7169 | 1524.7329      | 1486.7173 | 1500.7329 | I    | 685.4243  | 698.4447  | 712.4604  | 743.5026  | 726.4760  |
| 15 | 86.0964  | 1627.8326 | 1610.8061 | 1609.8220      | 1655.8275 | 1638.8010 | 1637.8170      | 1599.8013 | 1613.8170 | I    | 572.3402  | 585.3606  | 599.3763  | 630.4185  | 613.3919  |
| 16 | 72.0808  | 1726.9010 | 1709.8745 | 1708.8905      | 1754.8959 | 1737.8694 | 1736.8854      | 1712.8854 |           | V    | 473.2718  | 486.2922  |           | 517.3344  | 500.3079  |
| 17 | 74.0600  | 1827.9487 | 1810.9222 | 1809.9381      | 1855.9436 | 1838.9171 | 1837.9331      | 1811.9538 | 1813.9331 | T    | 372.2241  | 385.2445  | 387.2238  | 418.2660  | 401.2395  |
| 18 | 30.0338  | 1884.9702 | 1867.9436 | 1866.9596      | 1912.9651 | 1895.9385 | 1894.9545      |           |           | G    |           |           |           | 317.2183  | 300.1918  |
| 19 | 86.0964  | 1998.0542 | 1981.0277 | 1980.0437      | 2026.0492 | 2009.0226 | 2008.0386      | 1970.0229 | 1984.0386 | I    | 202.1186  | 215.1390  | 229.1547  | 260.1969  | 243.1703  |
| 20 | 101.1073 |           |           |                |           |           |                |           |           | K    | 74.0237   | 73.0284   |           | 147.1128  | 130.0863  |

| Seq | ya       | yb       | Seq | ya       | yb       | Seq  | ya       | yb       |
|-----|----------|----------|-----|----------|----------|------|----------|----------|
| AP  | 141.1022 | 169.0972 | APA | 212.1394 | 240.1343 | APAF | 359.2078 | 387.2027 |

|         |          |          |        |          |          |        |          |          |
|---------|----------|----------|--------|----------|----------|--------|----------|----------|
| APAFV   | 458.2762 | 486.2711 | APAFVE | 587.3188 | 615.3137 | PA     | 141.1022 | 169.0972 |
| PAF     | 288.1707 | 316.1656 | PAFV   | 387.2391 | 415.2340 | PAFVE  | 516.2817 | 544.2766 |
| PAFVEQ  | 644.3402 | 672.3352 | AF     | 191.1179 | 219.1128 | AFV    | 290.1863 | 318.1812 |
| AFVE    | 419.2289 | 447.2238 | AFVEQ  | 547.2875 | 575.2824 | AFVEQA | 618.3246 | 646.3195 |
| FV      | 219.1492 | 247.1441 | FVE    | 348.1918 | 376.1867 | FVEQ   | 476.2504 | 504.2453 |
| FVEQA   | 547.2875 | 575.2824 | FVEQAT | 648.3352 | 676.3301 | VE     | 201.1234 | 229.1183 |
| VEQ     | 329.1819 | 357.1769 | VEQA   | 400.2191 | 428.2140 | VEQAT  | 501.2667 | 529.2617 |
| VEQATE  | 630.3093 | 658.3042 | EQ     | 230.1135 | 258.1084 | EQA    | 301.1506 | 329.1456 |
| EQAT    | 402.1983 | 430.1932 | EQATE  | 531.2409 | 559.2358 | EQATEQ | 659.2995 | 687.2944 |
| QA      | 172.1081 | 200.1030 | QAT    | 273.1557 | 301.1506 | QATE   | 402.1983 | 430.1932 |
| QATEQ   | 530.2569 | 558.2518 | QATEQQ | 658.3155 | 686.3104 | AT     | 145.0972 | 173.0921 |
| ATE     | 274.1397 | 302.1347 | ATEQ   | 402.1983 | 430.1932 | ATEQQ  | 530.2569 | 558.2518 |
| ATEQQI  | 643.3410 | 671.3359 | TE     | 203.1026 | 231.0975 | TEQ    | 331.1612 | 359.1561 |
| TEQQ    | 459.2198 | 487.2147 | TEQQI  | 572.3039 | 600.2988 | TEQQII | 685.3879 | 713.3828 |
| EQ      | 230.1135 | 258.1084 | EQQ    | 358.1721 | 386.1670 | EQQI   | 471.2562 | 499.2511 |
| EQQII   | 584.3402 | 612.3352 | EQQIV  | 683.4087 | 711.4036 | QQ     | 229.1295 | 257.1244 |
| QQI     | 342.2136 | 370.2085 | QQII   | 455.2976 | 483.2926 | QQIIV  | 554.3661 | 582.3610 |
| QQIIVT  | 655.4137 | 683.4087 | QI     | 214.1550 | 242.1499 | QII    | 327.2391 | 355.2340 |
| QIIV    | 426.3075 | 454.3024 | QIIVT  | 527.3552 | 555.3501 | QIIVTG | 584.3766 | 612.3715 |
| QIIVTGI | 697.4607 | 725.4556 | II     | 199.1805 | 227.1754 | IIV    | 298.2489 | 326.2438 |
| IIVT    | 399.2966 | 427.2915 | IIVTG  | 456.3180 | 484.3130 | IIVTGI | 569.4021 | 597.3970 |
| IV      | 185.1648 | 213.1598 | IVT    | 286.2125 | 314.2074 | IVTG   | 343.2340 | 371.2289 |
| IVTGI   | 456.3180 | 484.3130 | VT     | 173.1285 | 201.1234 | VTG    | 230.1499 | 258.1448 |
| VTGI    | 343.2340 | 371.2289 | TG     | 131.0815 | 159.0764 | TGI    | 244.1656 | 272.1605 |
| GI      | 143.1179 | 171.1128 |        |          |          |        |          |          |

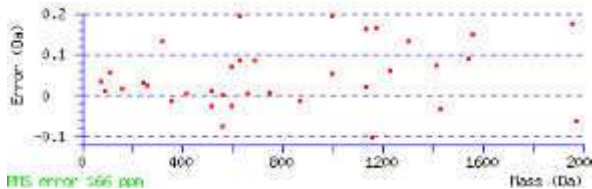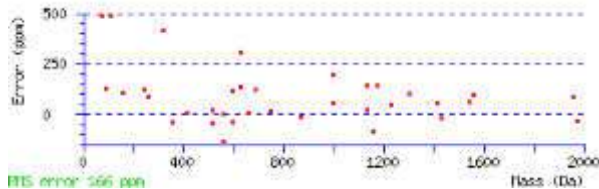

NCBI BLAST search of [EAPAFVEQATEQQIIVTGIK](#)  
 (Parameters: blastp, nr protein database, expect=20000, no filter, PAM30)  
 Other BLAST [web gateways](#)

All matches to this query

| Score | Mr(calcd) | Delta   | Sequence                              |
|-------|-----------|---------|---------------------------------------|
| 29.6  | 2171.1474 | 0.0633  | <a href="#">EAPAFVEQATEQQIIVTGIK</a>  |
| 29.6  | 2171.1474 | 0.0633  | <a href="#">EAPAFVEQATEQQILVTGIK</a>  |
| 18.6  | 2171.2752 | -0.0644 | <a href="#">LMALAAVHIEPTLSLITNVR</a>  |
| 16.2  | 2171.2413 | -0.0305 | <a href="#">QLKSTLENIISTIEILOK</a>    |
| 15.7  | 2171.1004 | 0.1103  | <a href="#">MTAAQODNALQVTGLALEAR</a>  |
| 15.6  | 2171.1474 | 0.0633  | <a href="#">EAPAFVEQETAQQILVTGIK</a>  |
| 15.4  | 2171.2170 | -0.0063 | <a href="#">ICKTSIMLIHAGALGNLIDR</a>  |
| 14.9  | 2171.0970 | 0.1137  | <a href="#">EWLSSQAELOEQIVARER</a>    |
| 13.0  | 2171.1223 | 0.0885  | <a href="#">IPSAVGYOPTLGTDLGGLOER</a> |
| 12.8  | 2171.1182 | 0.0925  | <a href="#">DSTGRLLTVLNDDINQLER</a>   |

Mascot: <http://www.matrixscience.com/>

**MATRIX SCIENCE Mascot Search Results**

**Peptide View Spot no 85**

MS/MS Fragmentation of **IPSAVGYQPTLATDLGGLQER**

Found in **gi3676294** in **NCBI nr**, mitochondrial ATPase beta subunit [Nicotiana sylvestris]

Match to Query 265: 2185.212424 from(2186.219700,1+) intensity(0.0000) index(33)

Title: Label: F15, Spot\_Id: 219903, Peak\_List\_Id: 228323, MSMS Job\_Run\_Id: 21987, Comment:

Data file C:\Documents and Settings\Administrator\Desktop\Farah-Garima 11May 2013\ppw\_F15\_136868277600.txt

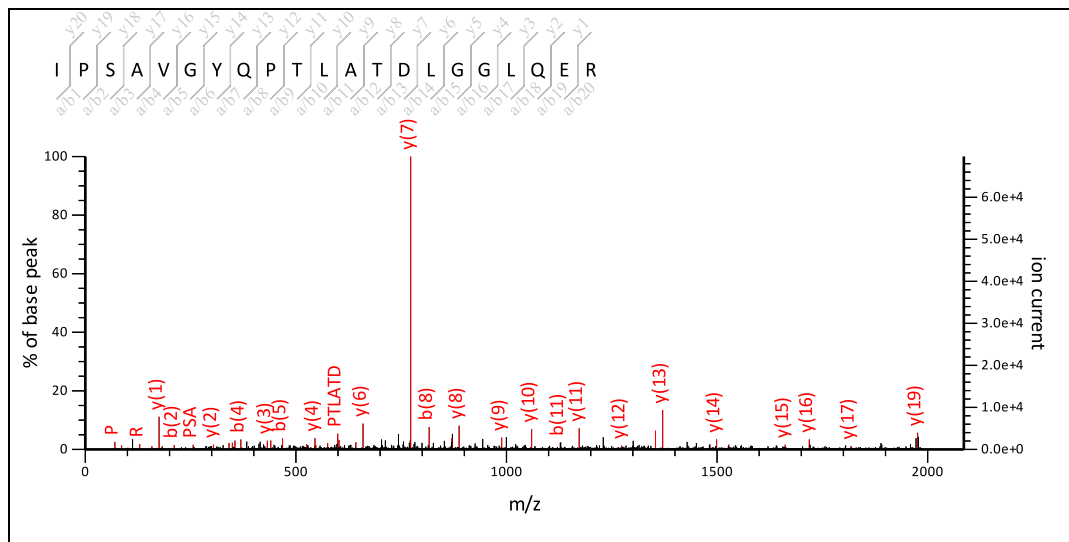

Navigation icons: Home, Back, Forward, Search, Print, etc. Range: 0 to 2085.93

Label all possible matches  Label matches used for scoring

Monoisotopic mass of neutral peptide Mr(calc): 2185.1379

Fixed modifications: Carbamidomethyl (C) (apply to specified residues or termini only)

Ions Score: 125 Expect: 6.1e-09

Matches : 56/405 fragment ions using 80 most intense peaks (help)

| #  | Immon.   | a         | a*        | a <sup>0</sup> | b         | b*        | b <sup>0</sup> | d         | d'        | Seq. | v         | w         | w'        | y         | y*        |
|----|----------|-----------|-----------|----------------|-----------|-----------|----------------|-----------|-----------|------|-----------|-----------|-----------|-----------|-----------|
| 1  | 86.0964  | 86.0964   |           |                | 114.0913  |           |                | 44.0495   |           | I    |           |           |           |           |           |
| 2  | 70.0651  | 183.1492  |           |                | 211.1441  |           |                | 157.1335  |           | P    | 2031.0142 | 2030.0189 |           | 2073.0611 | 2056.0346 |
| 3  | 60.0444  | 270.1812  |           | 252.1707       | 298.1761  |           | 280.1656       | 254.1863  |           | S    | 1943.9821 | 1942.9869 |           | 1976.0083 | 1958.9818 |
| 4  | 44.0495  | 341.2183  |           | 323.2078       | 369.2132  |           | 351.2027       |           |           | A    | 1872.9450 |           |           | 1888.9763 | 1871.9498 |
| 5  | 72.0808  | 440.2867  |           | 422.2762       | 468.2817  |           | 450.2711       | 426.2711  |           | V    | 1773.8766 | 1786.8970 |           | 1817.9392 | 1800.9127 |
| 6  | 30.0338  | 497.3082  |           | 479.2976       | 525.3031  |           | 507.2926       |           |           | G    |           |           |           | 1718.8708 | 1701.8442 |
| 7  | 136.0757 | 660.3715  |           | 642.3610       | 688.3665  |           | 670.3559       |           |           | Y    | 1553.7918 |           |           | 1661.8493 | 1644.8228 |
| 8  | 101.0709 | 788.4301  | 771.4036  | 770.4196       | 816.4250  | 799.3985  | 798.4145       | 731.4087  |           | Q    | 1425.7332 | 1424.7380 |           | 1498.7860 | 1481.7595 |
| 9  | 70.0651  | 885.4829  | 868.4563  | 867.4723       | 913.4778  | 896.4512  | 895.4672       | 859.4672  |           | P    | 1328.6805 | 1327.6852 |           | 1370.7274 | 1353.7009 |
| 10 | 74.0600  | 986.5306  | 969.5040  | 968.5200       | 1014.5255 | 997.4989  | 996.5149       | 970.5356  | 972.5149  | T    | 1227.6328 | 1240.6532 | 1242.6325 | 1273.6747 | 1256.6481 |
| 11 | 86.0964  | 1099.6146 | 1082.5881 | 1081.6041      | 1127.6095 | 1110.5830 | 1109.5990      | 1057.5677 |           | L    | 1114.5487 | 1113.5535 |           | 1172.6270 | 1155.6004 |
| 12 | 44.0495  | 1170.6517 | 1153.6252 | 1152.6412      | 1198.6467 | 1181.6201 | 1180.6361      |           |           | A    | 1043.5116 |           |           | 1059.5429 | 1042.5164 |
| 13 | 74.0600  | 1271.6994 | 1254.6729 | 1253.6889      | 1299.6943 | 1282.6678 | 1281.6838      | 1255.7045 | 1257.6838 | T    | 942.4639  | 955.4843  | 957.4636  | 988.5058  | 971.4793  |
| 14 | 88.0393  | 1386.7264 | 1369.6998 | 1368.7158      | 1414.7213 | 1397.6947 | 1396.7107      | 1342.7365 |           | D    | 827.4370  | 826.4417  |           | 887.4581  | 870.4316  |
| 15 | 86.0964  | 1499.8104 | 1482.7839 | 1481.7999      | 1527.8053 | 1510.7788 | 1509.7948      | 1457.7635 |           | L    | 714.3529  | 713.3577  |           | 772.4312  | 755.4046  |
| 16 | 30.0338  | 1556.8319 | 1539.8053 | 1538.8213      | 1584.8268 | 1567.8003 | 1566.8162      |           |           | G    |           |           |           | 659.3471  | 642.3206  |
| 17 | 30.0338  | 1613.8534 | 1596.8268 | 1595.8428      | 1641.8483 | 1624.8217 | 1623.8377      |           |           | G    |           |           |           | 602.3257  | 585.2991  |
| 18 | 86.0964  | 1726.9374 | 1709.9109 | 1708.9268      | 1754.9323 | 1737.9058 | 1736.9218      | 1684.8905 |           | L    | 487.2259  | 486.2307  |           | 545.3042  | 528.2776  |
| 19 | 101.0709 | 1854.9960 | 1837.9694 | 1836.9854      | 1882.9909 | 1865.9644 | 1864.9803      | 1797.9745 |           | Q    | 359.1674  | 358.1721  |           | 432.2201  | 415.1936  |
| 20 | 102.0550 | 1984.0386 | 1967.0120 | 1966.0280      | 2012.0335 | 1995.0070 | 1994.0229      | 1926.0331 |           | E    | 230.1248  | 229.1295  |           | 304.1615  | 287.1350  |
| 21 | 129.1135 |           |           |                |           |           |                |           |           | R    | 74.0237   | 73.0284   |           | 175.1190  | 158.0924  |

| Seq | ya | yb | Seq | ya | yb | Seq | ya | yb |
|-----|----|----|-----|----|----|-----|----|----|
|-----|----|----|-----|----|----|-----|----|----|



|        |          |          |        |          |          |         |          |          |
|--------|----------|----------|--------|----------|----------|---------|----------|----------|
| PS     | 157.0972 | 185.0921 | PSA    | 228.1343 | 256.1292 | PSAV    | 327.2027 | 355.1976 |
| PSAVG  | 384.2241 | 412.2191 | PSAVGY | 547.2875 | 575.2824 | PSAVGYQ | 675.3461 | 703.3410 |
| SA     | 131.0815 | 159.0764 | SAV    | 230.1499 | 258.1448 | SAVG    | 287.1714 | 315.1663 |
| SAVGY  | 450.2347 | 478.2296 | SAVGYQ | 578.2933 | 606.2882 | SAVGYQP | 675.3461 | 703.3410 |
| AV     | 143.1179 | 171.1128 | AVG    | 200.1394 | 228.1343 | AVGY    | 363.2027 | 391.1976 |
| AVGYQ  | 491.2613 | 519.2562 | AVGYQP | 588.3140 | 616.3089 | AVGYQPT | 689.3617 | 717.3566 |
| VG     | 129.1022 | 157.0972 | VGY    | 292.1656 | 320.1605 | VGYQ    | 420.2241 | 448.2191 |
| VGYP   | 517.2769 | 545.2718 | VGYP   | 618.3246 | 646.3195 | GY      | 193.0972 | 221.0921 |
| GYQ    | 321.1557 | 349.1506 | GYQP   | 418.2085 | 446.2034 | GYQPT   | 519.2562 | 547.2511 |
| GYQPTL | 632.3402 | 660.3352 | YQ     | 264.1343 | 292.1292 | YQP     | 361.1870 | 389.1819 |
| YQPT   | 462.2347 | 490.2296 | YQPTL  | 575.3188 | 603.3137 | YQPTLA  | 646.3559 | 674.3508 |
| QP     | 198.1237 | 226.1186 | QPT    | 299.1714 | 327.1663 | QPTL    | 412.2554 | 440.2504 |
| QPTLA  | 483.2926 | 511.2875 | QPTLAT | 584.3402 | 612.3352 | QPTLATD | 699.3672 | 727.3621 |
| PT     | 171.1128 | 199.1077 | PTL    | 284.1969 | 312.1918 | PTLA    | 355.2340 | 383.2289 |
| PTLAT  | 456.2817 | 484.2766 | PTLATD | 571.3086 | 599.3035 | PTLATDL | 684.3927 | 712.3876 |
| TL     | 187.1441 | 215.1390 | TLA    | 258.1812 | 286.1761 | TLAT    | 359.2289 | 387.2238 |
| TLATD  | 474.2558 | 502.2508 | TLATDL | 587.3399 | 615.3348 | TLATDLG | 644.3614 | 672.3563 |
| LA     | 157.1335 | 185.1285 | LAT    | 258.1812 | 286.1761 | LATD    | 373.2082 | 401.2031 |
| LATDL  | 486.2922 | 514.2871 | LATDLG | 543.3137 | 571.3086 | LATDLGG | 600.3352 | 628.3301 |
| AT     | 145.0972 | 173.0921 | ATD    | 260.1241 | 288.1190 | ATDL    | 373.2082 | 401.2031 |
| ATDLG  | 430.2296 | 458.2245 | ATDLGG | 487.2511 | 515.2460 | ATDLGGL | 600.3352 | 628.3301 |
| TD     | 189.0870 | 217.0819 | TDL    | 302.1710 | 330.1660 | TDLG    | 359.1925 | 387.1874 |
| TDLGG  | 416.2140 | 444.2089 | TDLGGL | 529.2980 | 557.2930 | TDLGGLQ | 657.3566 | 685.3515 |
| DL     | 201.1234 | 229.1183 | DLG    | 258.1448 | 286.1397 | DLGG    | 315.1663 | 343.1612 |
| DLGGL  | 428.2504 | 456.2453 | DLGGLQ | 556.3089 | 584.3039 | DLGGLQE | 685.3515 | 713.3464 |
| LG     | 143.1179 | 171.1128 | LGG    | 200.1394 | 228.1343 | LGGL    | 313.2234 | 341.2183 |
| LGGLQ  | 441.2820 | 469.2769 | LGGLQE | 570.3246 | 598.3195 | GG      | 87.0553  | 115.0502 |
| GGL    | 200.1394 | 228.1343 | GGLQ   | 328.1979 | 356.1928 | GGLQE   | 457.2405 | 485.2354 |
| GL     | 143.1179 | 171.1128 | GLQ    | 271.1765 | 299.1714 | GLQE    | 400.2191 | 428.2140 |
| LQ     | 214.1550 | 242.1499 | LQE    | 343.1976 | 371.1925 | QE      | 230.1135 | 258.1084 |

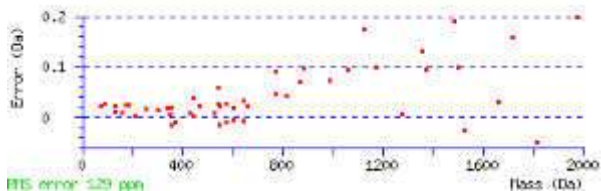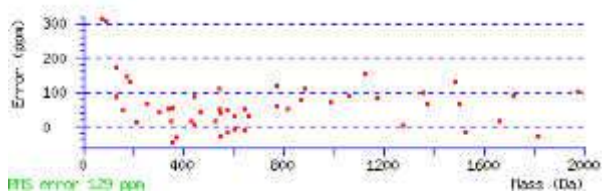

NCBI BLAST search of [IPSAVGYOPTLATDLGGLOER](#)  
 (Parameters: blastp, nr protein database, expect=20000, no filter, PAM30)  
 Other BLAST [web gateways](#)

All matches to this query

| Score | Mr(calcd) | Delta   | Sequence                                |
|-------|-----------|---------|-----------------------------------------|
| 125.4 | 2185.1379 | 0.0745  | <a href="#">IPSAVGYOPTLATDLGGLOER</a>   |
| 95.5  | 2185.1379 | 0.0745  | <a href="#">IPSAVGYOPTLATDVGALQER</a>   |
| 68.4  | 2185.1379 | 0.0745  | <a href="#">IPSAVGYOPTLASDLGALQER</a>   |
| 23.3  | 2185.0909 | 0.1215  | <a href="#">QLAAMOGDVEQQVARLOER</a>     |
| 21.0  | 2185.2219 | -0.0095 | <a href="#">VLLAAQLAIGFTTAVDGRVDR</a>   |
| 15.9  | 2185.0610 | 0.1514  | <a href="#">ESAGRADEEEILNQVEQLR</a>     |
| 15.0  | 2185.1895 | 0.0229  | <a href="#">IPTAYIKTFQPPAGIQVER</a>     |
| 14.3  | 2185.2219 | -0.0095 | <a href="#">VALIAFTGSVAGGLAVOKAAADR</a> |
| 14.3  | 2185.1967 | 0.0157  | <a href="#">APSLPHQAIDLNAKVASIGOR</a>   |
| 14.2  | 2185.1855 | 0.0269  | <a href="#">KLVHIPQALLEGDDAPGAVSR</a>   |



# Mascot Search Results

## Peptide View **Spot no 87**

### MS/MS Fragmentation of **LSIFETGIK**

Found in **gi|11466794** in **NCBI**nr, ATP synthase CF1 beta subunit [Oryza sativa Japonica Group]

Match to Query 3: 1006.647224 from(1007.654500,1+) intensity(0.0000) index(1)

Title: Label: D11, Spot\_Id: 216640, Peak\_List\_Id: 221245, MSMS Job\_Run\_Id: 21346, Comment:

Data file C:\Documents and Settings\Administrator\Desktop\farah BHU\RAJESH\12-1-13 raj\ppw\_D11\_135997699500.txt

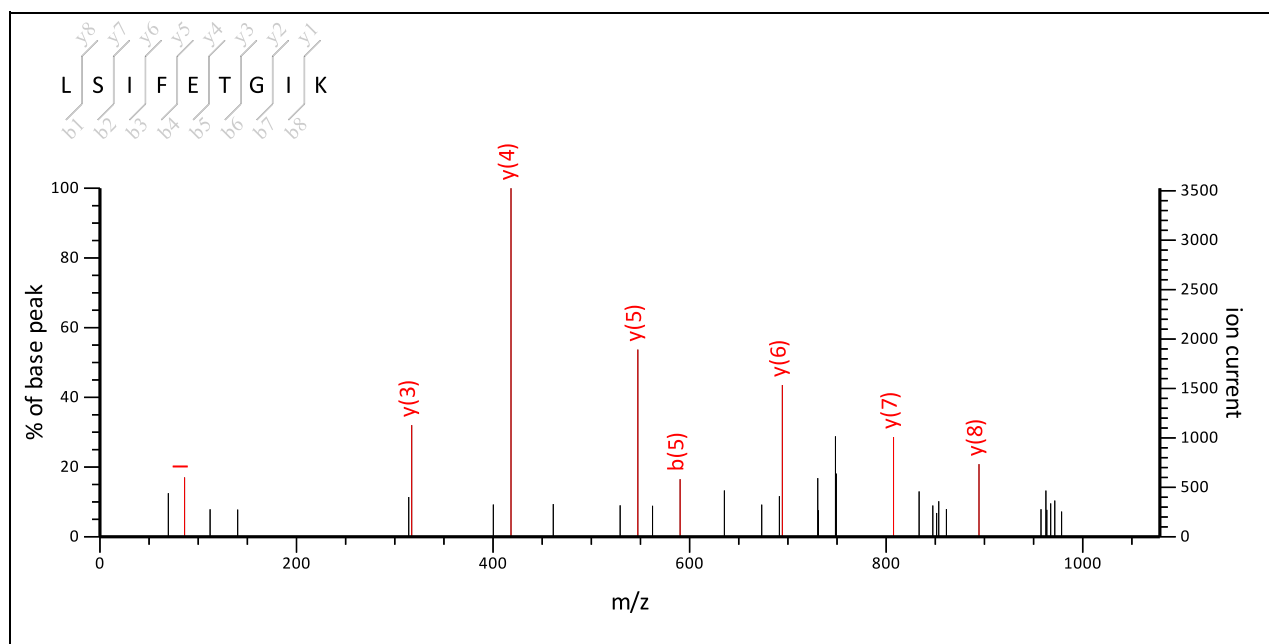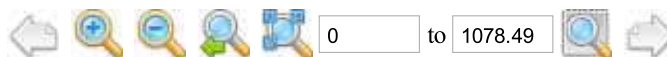

Label all possible matches  Label matches used for scoring

**Monoisotopic mass of neutral peptide Mr(calc):** 1006.5699

**Fixed modifications:** Carbamidomethyl (C) (apply to specified residues or termini only)

**Ions Score:** 53 **Expect:** 0.03

**Matches :** 11/125 fragment ions using 9 most intense peaks ([help](#))

| # | Immon.   | a        | a <sup>0</sup> | b        | b <sup>0</sup> | d        | d'       | Seq. | v        | w        | w'       | y        | y*       | y <sup>0</sup> | # |
|---|----------|----------|----------------|----------|----------------|----------|----------|------|----------|----------|----------|----------|----------|----------------|---|
| 1 | 86.0964  | 86.0964  |                | 114.0913 |                | 44.0495  |          | L    |          |          |          |          |          |                | 9 |
| 2 | 60.0444  | 173.1285 | 155.1179       | 201.1234 | 183.1128       | 157.1335 |          | S    | 862.4669 | 861.4716 |          | 894.4931 | 877.4666 | 876.4825       | 8 |
| 3 | 86.0964  | 286.2125 | 268.2020       | 314.2074 | 296.1969       | 258.1812 | 272.1969 | I    | 749.3828 | 762.4032 | 776.4189 | 807.4611 | 790.4345 | 789.4505       | 7 |
| 4 | 120.0808 | 433.2809 | 415.2704       | 461.2758 | 443.2653       |          |          | F    | 602.3144 |          |          | 694.3770 | 677.3505 | 676.3665       | 6 |
| 5 | 102.0550 | 562.3235 | 544.3130       | 590.3184 | 572.3079       | 504.3180 |          | E    | 473.2718 | 472.2766 |          | 547.3086 | 530.2821 | 529.2980       | 5 |
| 6 | 74.0600  | 663.3712 | 645.3606       | 691.3661 | 673.3556       | 647.3763 | 649.3556 | T    | 372.2241 | 385.2445 | 387.2238 | 418.2660 | 401.2395 | 400.2554       | 4 |
| 7 | 30.0338  | 720.3927 | 702.3821       | 748.3876 | 730.3770       |          |          | G    |          |          |          | 317.2183 | 300.1918 |                | 3 |
| 8 | 86.0964  | 833.4767 | 815.4662       | 861.4716 | 843.4611       | 805.4454 | 819.4611 | I    | 202.1186 | 215.1390 | 229.1547 | 260.1969 | 243.1703 |                | 2 |
| 9 | 101.1073 |          |                |          |                |          |          | K    | 74.0237  | 73.0284  |          | 147.1128 | 130.0863 |                | 1 |

| Seq   | ya       | yb       | Seq    | ya       | yb       | Seq   | ya       | yb       |
|-------|----------|----------|--------|----------|----------|-------|----------|----------|
| SI    | 173.1285 | 201.1234 | SIF    | 320.1969 | 348.1918 | SIFE  | 449.2395 | 477.2344 |
| SIFET | 550.2871 | 578.2821 | SIFETG | 607.3086 | 635.3035 | IF    | 233.1648 | 261.1598 |
| IFE   | 362.2074 | 390.2023 | IFET   | 463.2551 | 491.2500 | IFETG | 520.2766 | 548.2715 |



|               |          |          |              |          |          |            |          |          |
|---------------|----------|----------|--------------|----------|----------|------------|----------|----------|
| <b>IFETGI</b> | 633.3606 | 661.3556 | <b>FE</b>    | 249.1234 | 277.1183 | <b>FET</b> | 350.1710 | 378.1660 |
| <b>FETG</b>   | 407.1925 | 435.1874 | <b>FETGI</b> | 520.2766 | 548.2715 | <b>ET</b>  | 203.1026 | 231.0975 |
| <b>ETG</b>    | 260.1241 | 288.1190 | <b>ETGI</b>  | 373.2082 | 401.2031 | <b>TG</b>  | 131.0815 | 159.0764 |
| <b>TGI</b>    | 244.1656 | 272.1605 | <b>GI</b>    | 143.1179 | 171.1128 |            |          |          |

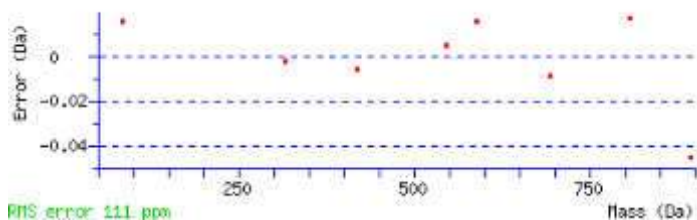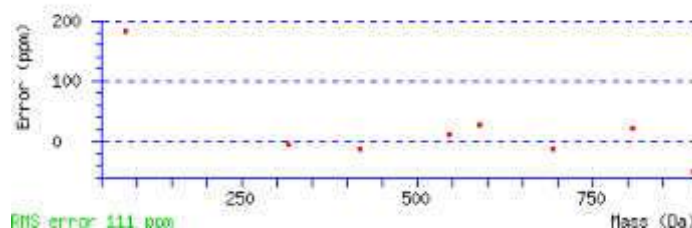

NCBI **BLAST** search of [LSIFETGIK](#)

(Parameters: blastp, nr protein database, expect=20000, no filter, PAM30)

Other BLAST [web gateways](#)

#### All matches to this query

| Score | Mr(calc)  | Delta  | Sequence                  |
|-------|-----------|--------|---------------------------|
| 53.5  | 1006.5699 | 0.0773 | <a href="#">LSIFETGIK</a> |
| 53.5  | 1006.5699 | 0.0773 | <a href="#">LSIFETGIK</a> |
| 53.5  | 1006.5699 | 0.0773 | <a href="#">LSIFETGIK</a> |
| 53.5  | 1006.5699 | 0.0773 | <a href="#">LSIFETGIK</a> |
| 53.5  | 1006.5699 | 0.0773 | <a href="#">LSIFETGIK</a> |
| 53.5  | 1006.5699 | 0.0773 | <a href="#">LSIFETGIK</a> |
| 53.5  | 1006.5699 | 0.0773 | <a href="#">LSIFETGIK</a> |
| 53.5  | 1006.5699 | 0.0773 | <a href="#">LSIFETGLK</a> |
| 53.5  | 1006.5699 | 0.0773 | <a href="#">LSIFETGLK</a> |
| 53.5  | 1006.5369 | 0.1104 | <a href="#">LSIMETGIK</a> |

Mascot: <http://www.matrixscience.com>

# MATRIX SCIENCE Mascot Search Results

## Peptide View **Spot no 87**

MS/MS Fragmentation of **VVDLLAPYR**

Found in **gi|11466794** in **NCBI**nr, ATP synthase CF1 beta subunit [Oryza sativa Japonica Group]

Match to Query 5: 1044.673224 from(1045.680500,1+) intensity(0.0000) index(2)

Title: Label: D11, Spot\_Id: 216640, Peak\_List\_Id: 221238, MSMS Job\_Run\_Id: 21346, Comment:

Data file C:\Documents and Settings\Administrator\Desktop\farah BHU\RAJESH\12-1-13 raj\ppw\_D11\_135997699500.txt

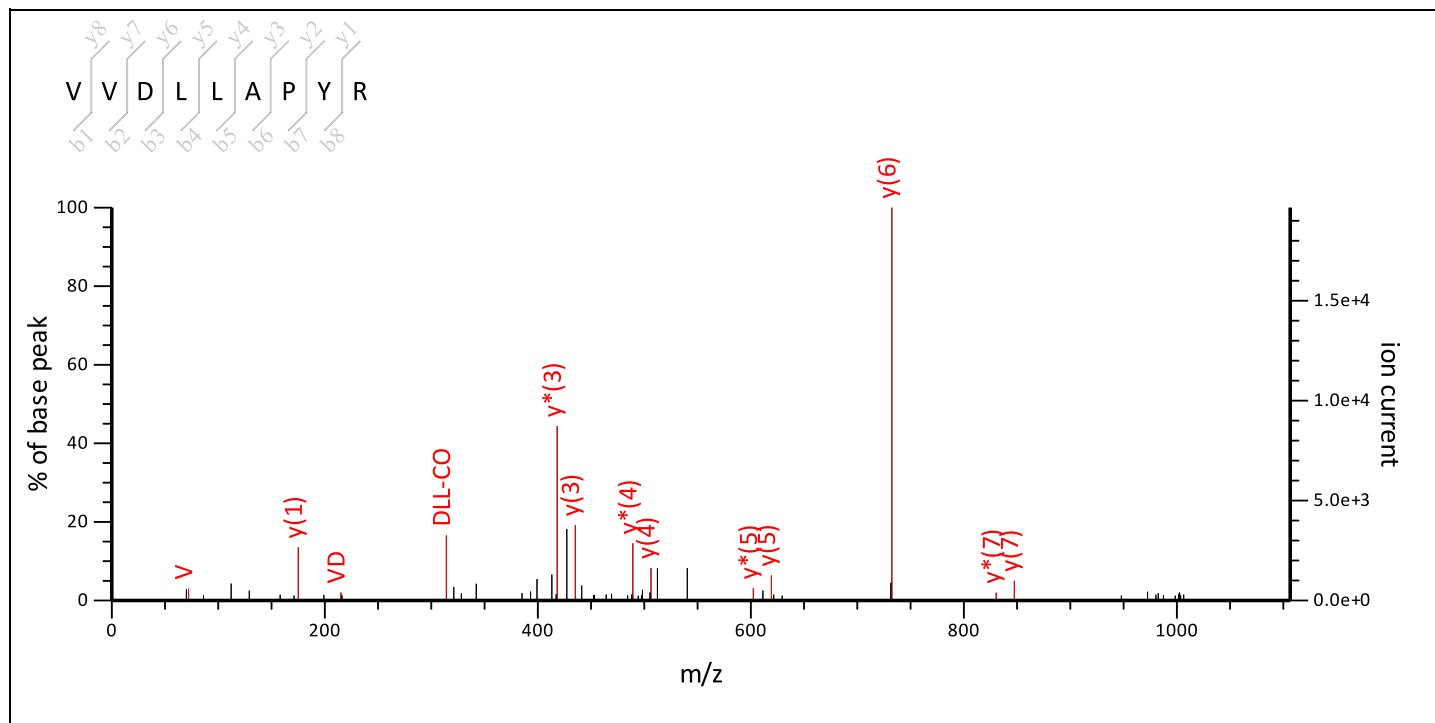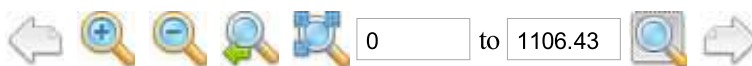

Label all possible matches  Label matches used for scoring

**Monoisotopic mass of neutral peptide Mr(calc):** 1044.5968

**Fixed modifications:** Carbamidomethyl (C) (apply to specified residues or termini only)

**Ions Score:** 48 **Expect:** 0.11

**Matches :** 17/115 fragment ions using 19 most intense peaks ([help](#))

| # | Immon.   | a        | a <sup>0</sup> | b        | b <sup>0</sup> | d        | Seq. | v        | w        | y        | y*       | y <sup>0</sup> | # |
|---|----------|----------|----------------|----------|----------------|----------|------|----------|----------|----------|----------|----------------|---|
| 1 | 72.0808  | 72.0808  |                | 100.0757 |                | 44.0495  | V    |          |          |          |          |                | 9 |
| 2 | 72.0808  | 171.1492 |                | 199.1441 |                | 157.1335 | V    | 902.4730 | 915.4934 | 946.5356 | 929.5091 | 928.5251       | 8 |
| 3 | 88.0393  | 286.1761 | 268.1656       | 314.1710 | 296.1605       | 242.1863 | D    | 787.4461 | 786.4509 | 847.4672 | 830.4407 | 829.4567       | 7 |
| 4 | 86.0964  | 399.2602 | 381.2496       | 427.2551 | 409.2445       | 357.2132 | L    | 674.3620 | 673.3668 | 732.4403 | 715.4137 |                | 6 |
| 5 | 86.0964  | 512.3443 | 494.3337       | 540.3392 | 522.3286       | 470.2973 | L    | 561.2780 | 560.2827 | 619.3562 | 602.3297 |                | 5 |
| 6 | 44.0495  | 583.3814 | 565.3708       | 611.3763 | 593.3657       |          | A    | 490.2409 |          | 506.2722 | 489.2456 |                | 4 |
| 7 | 70.0651  | 680.4341 | 662.4236       | 708.4291 | 690.4185       | 654.4185 | P    | 393.1881 | 392.1928 | 435.2350 | 418.2085 |                | 3 |
| 8 | 136.0757 | 843.4975 | 825.4869       | 871.4924 | 853.4818       |          | Y    | 230.1248 |          | 338.1823 | 321.1557 |                | 2 |

|   |          |  |  |  |  |   |         |         |          |          |   |
|---|----------|--|--|--|--|---|---------|---------|----------|----------|---|
| 9 | 129.1135 |  |  |  |  | R | 74.0237 | 73.0284 | 175.1190 | 158.0924 | 1 |
|---|----------|--|--|--|--|---|---------|---------|----------|----------|---|

| Seq    | ya       | yb       | Seq    | ya       | yb       | Seq   | ya       | yb       |
|--------|----------|----------|--------|----------|----------|-------|----------|----------|
| VD     | 187.1077 | 215.1026 | VDL    | 300.1918 | 328.1867 | VDLL  | 413.2758 | 441.2708 |
| VDLLA  | 484.3130 | 512.3079 | VDLLAP | 581.3657 | 609.3606 | DL    | 201.1234 | 229.1183 |
| DLL    | 314.2074 | 342.2023 | DLLA   | 385.2445 | 413.2395 | DLLAP | 482.2973 | 510.2922 |
| DLLAPY | 645.3606 | 673.3556 | LL     | 199.1805 | 227.1754 | LLA   | 270.2176 | 298.2125 |
| LLAP   | 367.2704 | 395.2653 | LLAPY  | 530.3337 | 558.3286 | LA    | 157.1335 | 185.1285 |
| LAP    | 254.1863 | 282.1812 | LAPY   | 417.2496 | 445.2445 | AP    | 141.1022 | 169.0972 |
| APY    | 304.1656 | 332.1605 | PY     | 233.1285 | 261.1234 |       |          |          |

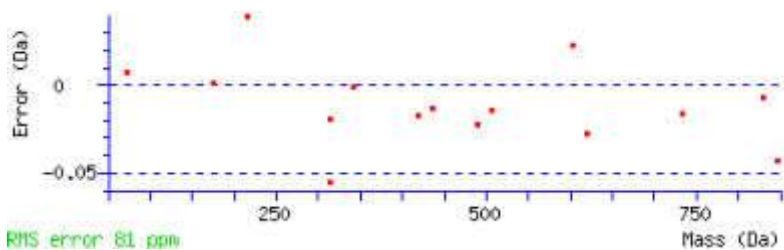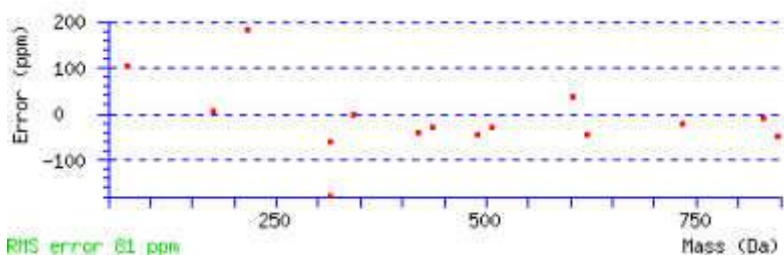

NCBI **BLAST** search of [VVDLLAPYR](#)

(Parameters: blastp, nr protein database, expect=20000, no filter, PAM30)

Other BLAST [web gateways](#)

#### All matches to this query

| Score | Mr(calc)  | Delta  | Sequence                  |
|-------|-----------|--------|---------------------------|
| 48.0  | 1044.1048 | 0.5685 | <a href="#">VVBLAPYR</a>  |
| 48.0  | 1044.5968 | 0.0765 | <a href="#">VVDILAPYR</a> |
| 48.0  | 1044.5968 | 0.0765 | <a href="#">VVDLIAPYR</a> |
| 48.0  | 1044.5968 | 0.0765 | <a href="#">VVDLLAPYR</a> |
| 48.0  | 1044.5968 | 0.0765 | <a href="#">VVDLLAPYR</a> |
| 48.0  | 1044.5968 | 0.0765 | <a href="#">VVDLLAPYR</a> |
| 48.0  | 1044.5968 | 0.0765 | <a href="#">VVDLLAPYR</a> |
| 48.0  | 1044.5968 | 0.0765 | <a href="#">VVDLLAPYR</a> |
| 48.0  | 1044.5968 | 0.0765 | <a href="#">VVDLLAPYR</a> |
| 48.0  | 1044.5968 | 0.0765 | <a href="#">VVDLLAPYR</a> |

Mascot: <http://www.matrixscience.com/>


**Mascot Search Results**
**Peptide View Spot no 87**
**MS/MS Fragmentation of SAPAFIELDTK**

 Found in **gi11466794** in **NCBI nr**, ATP synthase CF1 beta subunit [Oryza sativa Japonica Group]

Match to Query 6: 1190.709524 from(1191.716800,1+) intensity(0.0000) index(3)

Title: Label: D11, Spot\_Id: 216640, Peak\_List\_Id: 221243, MSMS Job\_Run\_Id: 21346, Comment:

Data file C:\Documents and Settings\Administrator\Desktop\farah BHU\RAJESH\12-1-13 raj\ppw\_D11\_135997699500.txt

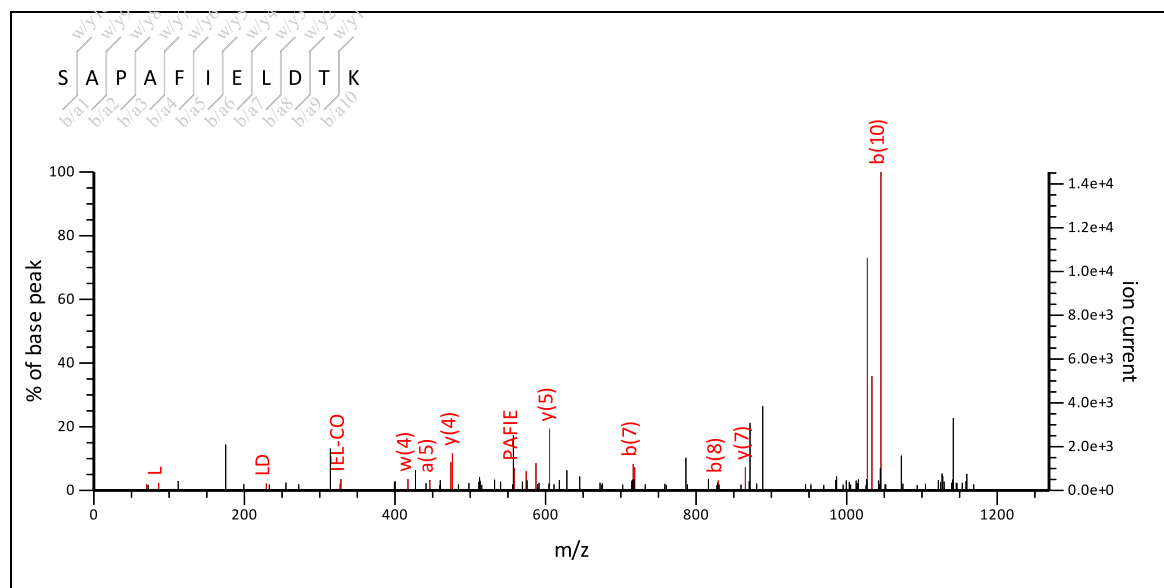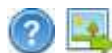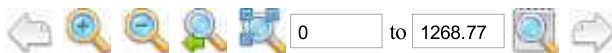
 Label all possible matches  Label matches used for scoring 

Monoisotopic mass of neutral peptide Mr(calc): 1190.6183

Fixed modifications: Carbamidomethyl (C) (apply to specified residues or termini only)

Ions Score: 27 Expect: 11

 Matches : 23/167 fragment ions using 44 most intense peaks ([help](#))

| #  | Immon.   | a         | a <sup>0</sup> | b         | b <sup>0</sup> | d         | d'        | Seq. | v         | w        | w'       | y         | y*        | y <sup>0</sup> | #  |
|----|----------|-----------|----------------|-----------|----------------|-----------|-----------|------|-----------|----------|----------|-----------|-----------|----------------|----|
| 1  | 60.0444  | 60.0444   | 42.0338        | 88.0393   | 70.0287        | 44.0495   |           | S    |           |          |          |           |           |                | 11 |
| 2  | 44.0495  | 131.0815  | 113.0709       | 159.0764  | 141.0659       |           |           | A    | 1088.5623 |          |          | 1104.5936 | 1087.5670 | 1086.5830      | 10 |
| 3  | 70.0651  | 228.1343  | 210.1237       | 256.1292  | 238.1186       | 202.1186  |           | P    | 991.5095  | 990.5142 |          | 1033.5564 | 1016.5299 | 1015.5459      | 9  |
| 4  | 44.0495  | 299.1714  | 281.1608       | 327.1663  | 309.1557       |           |           | A    | 920.4724  |          |          | 936.5037  | 919.4771  | 918.4931       | 8  |
| 5  | 120.0808 | 446.2398  | 428.2292       | 474.2347  | 456.2241       |           |           | F    | 773.4040  |          |          | 865.4666  | 848.4400  | 847.4560       | 7  |
| 6  | 86.0964  | 559.3239  | 541.3133       | 587.3188  | 569.3082       | 531.2926  | 545.3082  | I    | 660.3199  | 673.3403 | 687.3559 | 718.3981  | 701.3716  | 700.3876       | 6  |
| 7  | 102.0550 | 688.3665  | 670.3559       | 716.3614  | 698.3508       | 630.3610  |           | E    | 531.2773  | 530.2821 |          | 605.3141  | 588.2875  | 587.3035       | 5  |
| 8  | 86.0964  | 801.4505  | 783.4400       | 829.4454  | 811.4349       | 759.4036  |           | L    | 418.1932  | 417.1980 |          | 476.2715  | 459.2449  | 458.2609       | 4  |
| 9  | 88.0393  | 916.4775  | 898.4669       | 944.4724  | 926.4618       | 872.4876  |           | D    | 303.1663  | 302.1710 |          | 363.1874  | 346.1609  | 345.1769       | 3  |
| 10 | 74.0600  | 1017.5251 | 999.5146       | 1045.5201 | 1027.5095      | 1001.5302 | 1003.5095 | T    | 202.1186  | 215.1390 | 217.1183 | 248.1605  | 231.1339  | 230.1499       | 2  |
| 11 | 101.1073 |           |                |           |                |           |           | K    | 74.0237   | 73.0284  |          | 147.1128  | 130.0863  |                | 1  |

| Seq    | ya       | yb       | Seq    | ya       | yb       | Seq    | ya       | yb       |
|--------|----------|----------|--------|----------|----------|--------|----------|----------|
| AP     | 141.1022 | 169.0972 | APA    | 212.1394 | 240.1343 | APAF   | 359.2078 | 387.2027 |
| APAFI  | 472.2918 | 500.2867 | APAFIE | 601.3344 | 629.3293 | PA     | 141.1022 | 169.0972 |
| PAF    | 288.1707 | 316.1656 | PAFI   | 401.2547 | 429.2496 | PAFIE  | 530.2973 | 558.2922 |
| PAFIEL | 643.3814 | 671.3763 | AF     | 191.1179 | 219.1128 | AFI    | 304.2020 | 332.1969 |
| AFIE   | 433.2445 | 461.2395 | AFIEL  | 546.3286 | 574.3235 | AFIELD | 661.3556 | 689.3505 |

|              |                 |                 |               |          |          |              |          |          |
|--------------|-----------------|-----------------|---------------|----------|----------|--------------|----------|----------|
| <b>FI</b>    | 233.1648        | 261.1598        | <b>FIE</b>    | 362.2074 | 390.2023 | <b>FIEL</b>  | 475.2915 | 503.2864 |
| <b>FIELD</b> | 590.3184        | 618.3134        | <b>FIELDT</b> | 691.3661 | 719.3610 | <b>IE</b>    | 215.1390 | 243.1339 |
| <b>IEL</b>   | <b>328.2231</b> | 356.2180        | <b>IELD</b>   | 443.2500 | 471.2449 | <b>IELDT</b> | 544.2977 | 572.2926 |
| <b>EL</b>    | 215.1390        | 243.1339        | <b>ELD</b>    | 330.1660 | 358.1609 | <b>ELDT</b>  | 431.2136 | 459.2086 |
| <b>LD</b>    | 201.1234        | <b>229.1183</b> | <b>LDT</b>    | 302.1710 | 330.1660 | <b>DT</b>    | 189.0870 | 217.0819 |

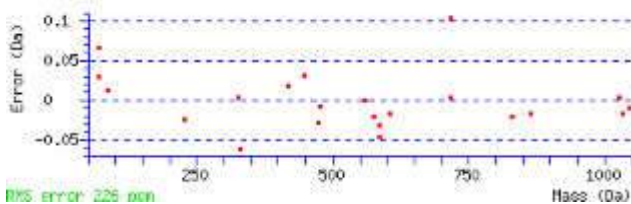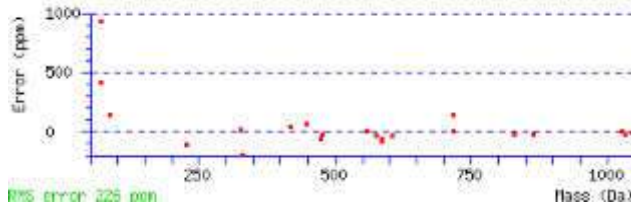

NCBI BLAST search of [SAPAFIELDTK](#)

(Parameters: blastp, nr protein database, expect=20000, no filter, PAM30)

Other BLAST [web gateways](#)

#### All matches to this query

| Score | Mr(calc)  | Delta  | Sequence                     |
|-------|-----------|--------|------------------------------|
| 27.3  | 1190.6183 | 0.0912 | <a href="#">SAPAFIELDTK</a>  |
| 27.3  | 1190.6183 | 0.0912 | <a href="#">SAPAFIELDTK</a>  |
| 27.3  | 1190.6183 | 0.0912 | <a href="#">SAPAFIELDTK</a>  |
| 27.1  | 1190.5931 | 0.1164 | <a href="#">SAPAFIQNDTK</a>  |
| 26.6  | 1190.5462 | 0.1633 | <a href="#">MVGGDAGQERR</a>  |
| 23.9  | 1189.6740 | 1.0355 | <a href="#">VVQKMIETVK</a>   |
| 23.3  | 1190.5779 | 0.1316 | <a href="#">ATAESPASTQTK</a> |
| 22.0  | 1189.6190 | 1.0905 | <a href="#">LLSGLSSEEAK</a>  |
| 20.7  | 1190.6030 | 0.1065 | <a href="#">GTTESEIVDK</a>   |
| 20.4  | 1189.6343 | 1.0752 | <a href="#">AAPSFIQLDTK</a>  |

Mascot: <http://www.matrixscience.com/>


**Mascot Search Results**
**Peptide View Spot no 87**
**MS/MS Fragmentation of VVDLLAPYRR**

 Found in **gi11466794** in **NCBIInr**, ATP synthase CF1 beta subunit [Oryza sativa Japonica Group]

Match to Query 8: 1200.762624 from(1201.769900,1+) intensity(0.0000) index(4)

Title: Label: D11, Spot\_Id: 216640, Peak\_List\_Id: 221234, MSMS Job\_Run\_Id: 21346, Comment:

Data file C:\Documents and Settings\Administrator\Desktop\farah BHU\RAJESH\12-1-13 raj\ppw\_D11\_135997699500.txt

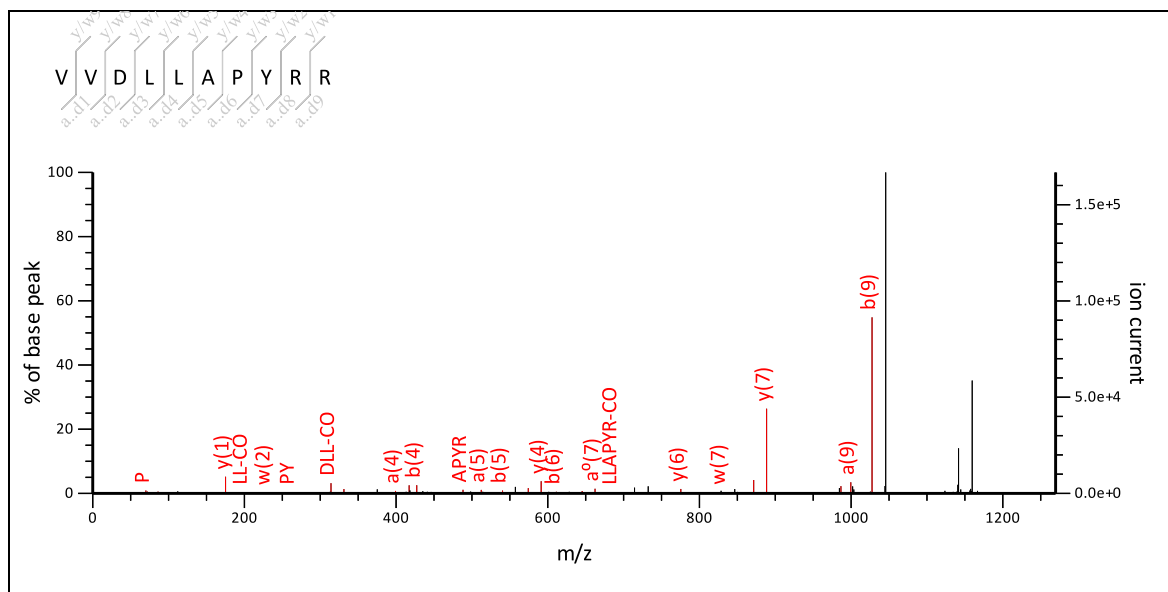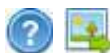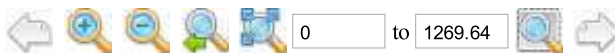
 Label all possible matches  Label matches used for scoring 

Monoisotopic mass of neutral peptide Mr(calc): 1200.6979

Fixed modifications: Carbamidomethyl (C) (apply to specified residues or termini only)

Ions Score: 37 Expect: 1.1

 Matches : 44/136 fragment ions using 55 most intense peaks ([help](#))

| #  | Immon.   | a        | a*       | a <sup>0</sup> | b         | b*        | b <sup>0</sup> | d        | Seq. | v         | w         | y         | y*        | y <sup>0</sup> | #  |
|----|----------|----------|----------|----------------|-----------|-----------|----------------|----------|------|-----------|-----------|-----------|-----------|----------------|----|
| 1  | 72.0808  | 72.0808  |          |                | 100.0757  |           |                | 44.0495  | V    |           |           |           |           |                | 10 |
| 2  | 72.0808  | 171.1492 |          |                | 199.1441  |           |                | 157.1335 | V    | 1058.5742 | 1071.5946 | 1102.6368 | 1085.6102 | 1084.6262      | 9  |
| 3  | 88.0393  | 286.1761 |          | 268.1656       | 314.1710  |           | 296.1605       | 242.1863 | D    | 943.5472  | 942.5520  | 1003.5683 | 986.5418  | 985.5578       | 8  |
| 4  | 86.0964  | 399.2602 |          | 381.2496       | 427.2551  |           | 409.2445       | 357.2132 | L    | 830.4631  | 829.4679  | 888.5414  | 871.5148  |                | 7  |
| 5  | 86.0964  | 512.3443 |          | 494.3337       | 540.3392  |           | 522.3286       | 470.2973 | L    | 717.3791  | 716.3838  | 775.4573  | 758.4308  |                | 6  |
| 6  | 44.0495  | 583.3814 |          | 565.3708       | 611.3763  |           | 593.3657       |          | A    | 646.3420  |           | 662.3733  | 645.3467  |                | 5  |
| 7  | 70.0651  | 680.4341 |          | 662.4236       | 708.4291  |           | 690.4185       | 654.4185 | P    | 549.2892  | 548.2940  | 591.3362  | 574.3096  |                | 4  |
| 8  | 136.0757 | 843.4975 |          | 825.4869       | 871.4924  |           | 853.4818       |          | Y    | 386.2259  |           | 494.2834  | 477.2568  |                | 3  |
| 9  | 129.1135 | 999.5986 | 982.5720 | 981.5880       | 1027.5935 | 1010.5669 | 1009.5829      | 914.5346 | R    | 230.1248  | 229.1295  | 331.2201  | 314.1935  |                | 2  |
| 10 | 129.1135 |          |          |                |           |           |                |          | R    | 74.0237   | 73.0284   | 175.1190  | 158.0924  |                | 1  |

| Seq    | ya       | yb       | Seq    | ya       | yb       | Seq    | ya       | yb       |
|--------|----------|----------|--------|----------|----------|--------|----------|----------|
| VD     | 187.1077 | 215.1026 | VDL    | 300.1918 | 328.1867 | VDLL   | 413.2758 | 441.2708 |
| VDLLA  | 484.3130 | 512.3079 | VDLLAP | 581.3657 | 609.3606 | DL     | 201.1234 | 229.1183 |
| DLL    | 314.2074 | 342.2023 | DLLA   | 385.2445 | 413.2395 | DLLAP  | 482.2973 | 510.2922 |
| DLLAPY | 645.3606 | 673.3556 | LL     | 199.1805 | 227.1754 | LLA    | 270.2176 | 298.2125 |
| LLAP   | 367.2704 | 395.2653 | LLAPY  | 530.3337 | 558.3286 | LLAPYR | 686.4348 | 714.4297 |
| LA     | 157.1335 | 185.1285 | LAP    | 254.1863 | 282.1812 | LAPY   | 417.2496 | 445.2445 |

|       |          |          |    |          |          |     |          |          |
|-------|----------|----------|----|----------|----------|-----|----------|----------|
| LAPYR | 573.3507 | 601.3457 | AP | 141.1022 | 169.0972 | APY | 304.1656 | 332.1605 |
| APYR  | 460.2667 | 488.2616 | PY | 233.1285 | 261.1234 | PYR | 389.2296 | 417.2245 |
| YR    | 292.1768 | 320.1717 |    |          |          |     |          |          |

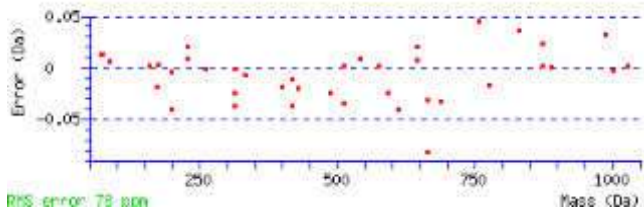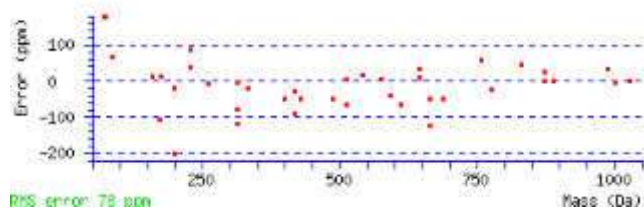

NCBI BLAST search of [VVDLLAPYRR](#)

(Parameters: blastp, nr protein database, expect=20000, no filter, PAM30)

Other BLAST [web gateways](#)

#### All matches to this query

| Score | Mr(calc)  | Delta  | Sequence                   |
|-------|-----------|--------|----------------------------|
| 40.7  | 1200.2059 | 0.5568 | <a href="#">VVBLAPYRR</a>  |
| 38.3  | 1200.6979 | 0.0647 | <a href="#">VVDLIAPYRR</a> |
| 37.4  | 1200.6979 | 0.0647 | <a href="#">VVDLLAPYRR</a> |
| 37.4  | 1200.6979 | 0.0647 | <a href="#">VVDLLAPYRR</a> |
| 37.4  | 1200.6979 | 0.0647 | <a href="#">VVDLLAPYRR</a> |
| 37.4  | 1200.6979 | 0.0647 | <a href="#">VVDLLAPYRR</a> |
| 37.4  | 1200.6979 | 0.0647 | <a href="#">VVDLLAPYRR</a> |
| 37.4  | 1200.6979 | 0.0647 | <a href="#">VVDLLAPYRR</a> |
| 37.4  | 1200.6979 | 0.0647 | <a href="#">VVDLLAPYRR</a> |
| 37.4  | 1200.6979 | 0.0647 | <a href="#">VVDLLAPYRR</a> |
| 37.4  | 1200.6979 | 0.0647 | <a href="#">VVDLLAPYRR</a> |

Mascot: <http://www.matrixscience.com/>





# Mascot Search Results

## Peptide View **Spot no 87**

MS/MS Fragmentation of **AHGGVSVFGGVGER**

Found in **gi|11466794** in **NCBI**nr, ATP synthase CF1 beta subunit [Oryza sativa Japonica Group]

Match to Query 10: 1327.745924 from(1328.753200,1+) intensity(0.0000) index(5)

Title: Label: D11, Spot\_Id: 216640, Peak\_List\_Id: 221228, MSMS Job\_Run\_Id: 21346, Comment:

Data file C:\Documents and Settings\Administrator\Desktop\farah BHU\RAJESH12-1-13 raj\ppw\_D11\_135997699500.txt

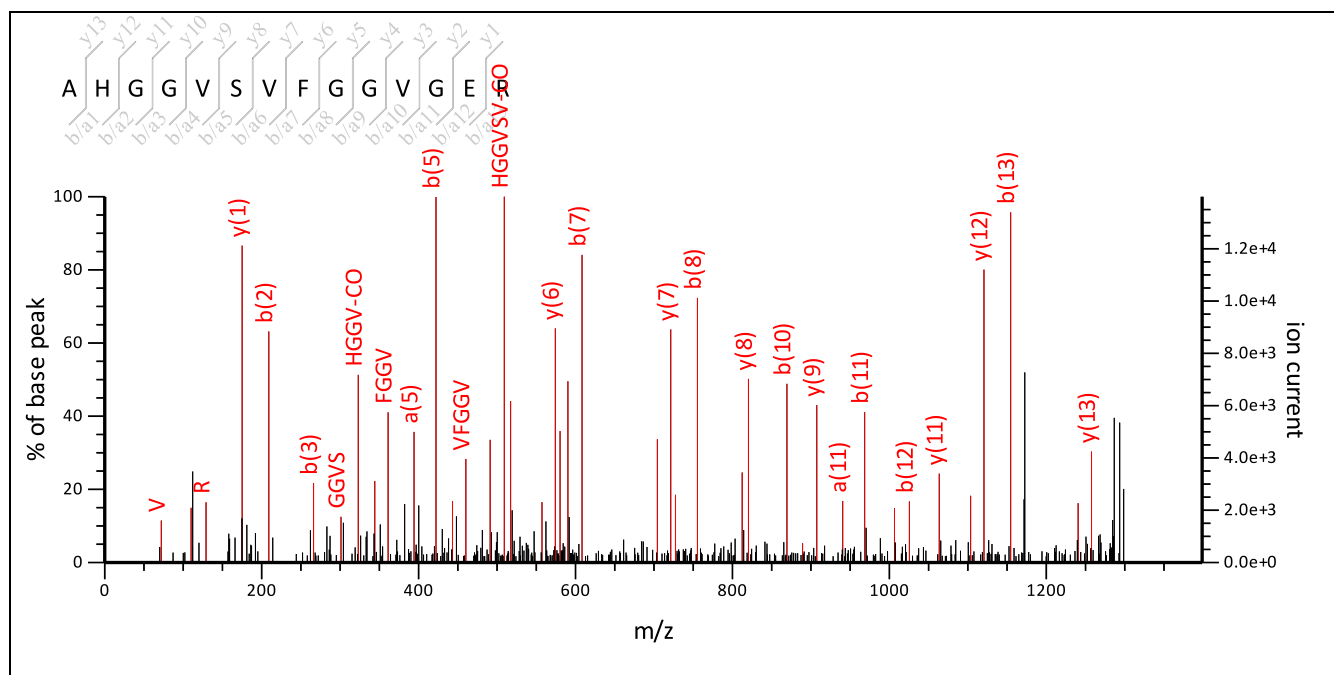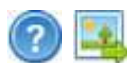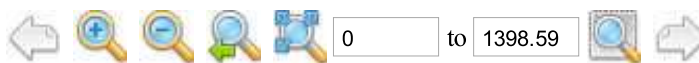

Label all possible matches  Label matches used for scoring

**Monoisotopic mass of neutral peptide Mr(calc):** 1327.6633

**Fixed modifications:** Carbamidomethyl (C) (apply to specified residues or termini only)

**Ions Score:** 128 **Expect:** 8.9e-10

**Matches :** 53/220 fragment ions using 52 most intense peaks ([help](#))

| #  | Immon.   | a        | a <sup>0</sup> | b        | b <sup>0</sup> | d        | Seq. | v         | w        | y         | y*        | y <sup>0</sup> | #  |
|----|----------|----------|----------------|----------|----------------|----------|------|-----------|----------|-----------|-----------|----------------|----|
| 1  | 44.0495  | 44.0495  |                | 72.0444  |                | 44.0495  | A    |           |          |           |           |                | 14 |
| 2  | 110.0713 | 181.1084 |                | 209.1033 |                |          | H    | 1175.5804 |          | 1257.6335 | 1240.6069 | 1239.6229      | 13 |
| 3  | 30.0338  | 238.1299 |                | 266.1248 |                |          | G    |           |          | 1120.5745 | 1103.5480 | 1102.5640      | 12 |
| 4  | 30.0338  | 295.1513 |                | 323.1462 |                |          | G    |           |          | 1063.5531 | 1046.5265 | 1045.5425      | 11 |
| 5  | 72.0808  | 394.2197 |                | 422.2146 |                | 380.2041 | V    | 962.4690  | 975.4894 | 1006.5316 | 989.5051  | 988.5211       | 10 |
| 6  | 60.0444  | 481.2518 | 463.2412       | 509.2467 | 491.2361       | 465.2568 | S    | 875.4370  | 874.4417 | 907.4632  | 890.4367  | 889.4526       | 9  |
| 7  | 72.0808  | 580.3202 | 562.3096       | 608.3151 | 590.3045       | 566.3045 | V    | 776.3686  | 789.3890 | 820.4312  | 803.4046  | 802.4206       | 8  |
| 8  | 120.0808 | 727.3886 | 709.3780       | 755.3835 | 737.3729       |          | F    | 629.3002  |          | 721.3628  | 704.3362  | 703.3522       | 7  |
| 9  | 30.0338  | 784.4100 | 766.3995       | 812.4050 | 794.3944       |          | G    |           |          | 574.2944  | 557.2678  | 556.2838       | 6  |
| 10 | 30.0338  | 841.4315 | 823.4209       | 869.4264 | 851.4159       |          | G    |           |          | 517.2729  | 500.2463  | 499.2623       | 5  |
| 11 | 72.0808  | 940.4999 | 922.4894       | 968.4948 | 950.4843       | 926.4843 | V    | 416.1888  | 429.2092 | 460.2514  | 443.2249  | 442.2409       | 4  |

|    |                 |           |           |                  |           |           |   |          |          |                 |                 |          |   |
|----|-----------------|-----------|-----------|------------------|-----------|-----------|---|----------|----------|-----------------|-----------------|----------|---|
| 12 | 30.0338         | 997.5214  | 979.5108  | <b>1025.5163</b> | 1007.5057 |           | G |          |          | <b>361.1830</b> | <b>344.1565</b> | 343.1724 | 3 |
| 13 | 102.0550        | 1126.5640 | 1108.5534 | <b>1154.5589</b> | 1136.5483 | 1068.5585 | E | 230.1248 | 229.1295 | 304.1615        | 287.1350        | 286.1510 | 2 |
| 14 | <b>129.1135</b> |           |           |                  |           |           | R | 74.0237  | 73.0284  | <b>175.1190</b> | 158.0924        |          | 1 |

| Seq      | ya              | yb              | Seq      | ya              | yb              | Seq      | ya              | yb              |
|----------|-----------------|-----------------|----------|-----------------|-----------------|----------|-----------------|-----------------|
| HG       | 167.0927        | 195.0877        | HGG      | 224.1142        | 252.1091        | HGGV     | <b>323.1826</b> | 351.1775        |
| HGGVS    | 410.2146        | 438.2096        | HGGVSV   | <b>509.2831</b> | 537.2780        | HGGVSVF  | 656.3515        | 684.3464        |
| GG       | 87.0553         | 115.0502        | GGV      | 186.1237        | 214.1186        | GGVS     | 273.1557        | <b>301.1506</b> |
| GGVSV    | 372.2241        | 400.2191        | GGVSVF   | 519.2926        | 547.2875        | GGVSVFG  | 576.3140        | 604.3089        |
| GGVSVFVG | 633.3355        | 661.3304        | GV       | <b>129.1022</b> | 157.0972        | GVS      | 216.1343        | 244.1292        |
| GVS      | 315.2027        | 343.1976        | GVSF     | 462.2711        | 490.2660        | GVSFVG   | 519.2926        | 547.2875        |
| GVSFVG   | 576.3140        | 604.3089        | GVSFVGGV | 675.3824        | 703.3774        | VS       | 159.1128        | 187.1077        |
| VSV      | 258.1812        | 286.1761        | VSVF     | 405.2496        | 433.2445        | VSVFVG   | 462.2711        | 490.2660        |
| VSVFVG   | 519.2926        | 547.2875        | VSVFVGGV | 618.3610        | 646.3559        | VSVFVGGV | 675.3824        | 703.3774        |
| SV       | 159.1128        | 187.1077        | SVF      | 306.1812        | 334.1761        | SVFVG    | 363.2027        | 391.1976        |
| SVFVG    | 420.2241        | 448.2191        | SVFVGGV  | 519.2926        | 547.2875        | SVFVGGV  | 576.3140        | 604.3089        |
| VF       | 219.1492        | 247.1441        | VFG      | 276.1707        | 304.1656        | VFGG     | 333.1921        | <b>361.1870</b> |
| VFGG     | 432.2605        | <b>460.2554</b> | VFGGV    | 489.2820        | <b>517.2769</b> | VFGGVGE  | 618.3246        | 646.3195        |
| FG       | 177.1022        | 205.0972        | FGG      | 234.1237        | 262.1186        | FGGV     | 333.1921        | <b>361.1870</b> |
| FGGV     | 390.2136        | 418.2085        | FGGVGE   | 519.2562        | 547.2511        | GG       | 87.0553         | 115.0502        |
| GGV      | 186.1237        | 214.1186        | GGVG     | 243.1452        | 271.1401        | GGVGE    | 372.1878        | 400.1827        |
| GV       | <b>129.1022</b> | 157.0972        | GVG      | 186.1237        | 214.1186        | GVGE     | 315.1663        | 343.1612        |
| VG       | <b>129.1022</b> | 157.0972        | VGE      | 258.1448        | 286.1397        | GE       | 159.0764        | 187.0713        |

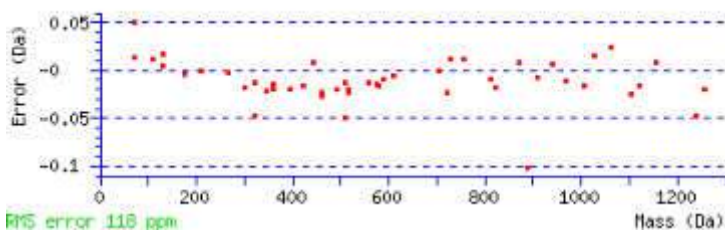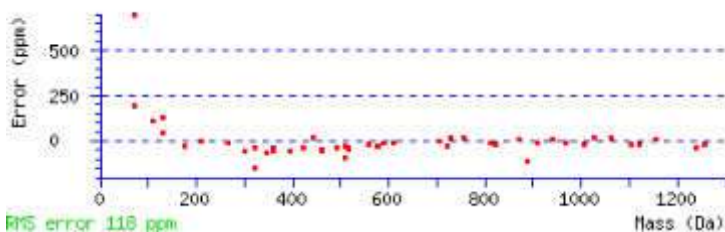

NCBI BLAST search of [AHGGVSVFGGVGER](#)  
 (Parameters: blastp, nr protein database, expect=20000, no filter, PAM30)  
 Other BLAST [web gateways](#)

All matches to this query

| Score | Mr(calc)  | Delta  | Sequence                       |
|-------|-----------|--------|--------------------------------|
| 127.9 | 1327.6633 | 0.0826 | <a href="#">AHGGVSVFGGVGER</a> |
| 127.9 | 1327.6633 | 0.0826 | <a href="#">AHGGVSVFGGVGER</a> |
| 127.9 | 1327.6633 | 0.0826 | <a href="#">AHGGVSVFGGVGER</a> |
| 127.9 | 1327.6633 | 0.0826 | <a href="#">AHGGVSVFGGVGER</a> |

|       |           |        |                                |
|-------|-----------|--------|--------------------------------|
| 127.9 | 1327.6633 | 0.0826 | <a href="#">AHGGVSVFGGVGER</a> |
| 127.9 | 1327.6633 | 0.0826 | <a href="#">AHGGVSVFGGVGER</a> |
| 127.9 | 1327.6633 | 0.0826 | <a href="#">AHGGVSVFGGVGER</a> |
| 127.9 | 1327.6633 | 0.0826 | <a href="#">AHGGVSVFGGVGER</a> |
| 127.9 | 1327.6633 | 0.0826 | <a href="#">AHGGVSVFGGVGER</a> |
| 127.9 | 1327.6633 | 0.0826 | <a href="#">AHGGVSVFGGVGER</a> |

**Mascot:** <http://www.matrixscience.com/>

**MATRIX SCIENCE Mascot Search Results**

**Peptide View Spot no 87**

MS/MS Fragmentation of **IVGNEHYETAQR**

Found in **gi|11466794** in **NCBIInr**, ATP synthase CF1 beta subunit [Oryza sativa Japonica Group]

Match to Query 12: 1415.766024 from(1416.773300,1+) intensity(0.0000) index(6)

Title: Label: D11, Spot\_Id: 216640, Peak\_List\_Id: 221230, MSMS Job\_Run\_Id: 21346, Comment:

Data file C:\Documents and Settings\Administrator\Desktop\farah BHU\RAJESH\12-1-13 raj\ppw\_D11\_135997699500.txt

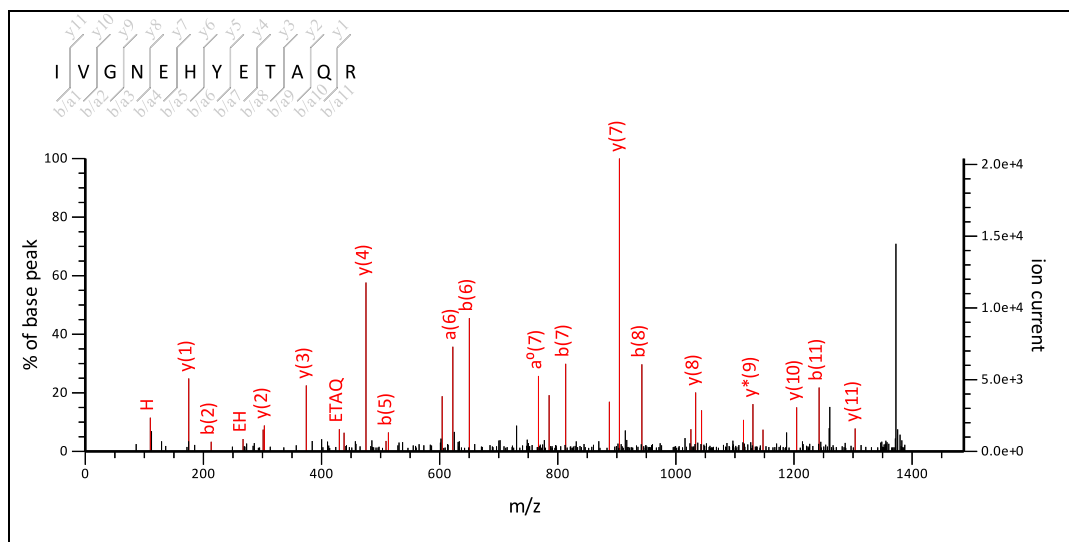

Navigation icons: Home, Back, Forward, Search, Print, etc. Range: 0 to 1487.61

Label all possible matches  Label matches used for scoring

Monoisotopic mass of neutral peptide Mr(calc): 1415.6793

Fixed modifications: Carbamidomethyl (C) (apply to specified residues or termini only)

Ions Score: 95 Expect: 1.7e-06

Matches : 40/181 fragment ions using 41 most intense peaks [\(help\)](#)

| #  | Immon.          | a               | a*        | a <sup>0</sup>  | b                | b*        | b <sup>0</sup>   | d         | d'        | Seq. | v         | w         | w'       | y                | y*               |
|----|-----------------|-----------------|-----------|-----------------|------------------|-----------|------------------|-----------|-----------|------|-----------|-----------|----------|------------------|------------------|
| 1  | 86.0964         | 86.0964         |           |                 | 114.0913         |           |                  | 44.0495   |           | I    |           |           |          |                  |                  |
| 2  | 72.0808         | 185.1648        |           |                 | <b>213.1598</b>  |           |                  | 171.1492  |           | V    | 1259.5400 | 1272.5604 |          | <b>1303.6026</b> | 1286.5760        |
| 3  | 30.0338         | 242.1863        |           |                 | 270.1812         |           |                  |           |           | G    |           |           |          | <b>1204.5341</b> | 1187.5076        |
| 4  | 87.0553         | 356.2292        | 339.2027  |                 | 384.2241         | 367.1976  |                  | 313.2234  |           | N    | 1088.4756 | 1087.4803 |          | <b>1147.5127</b> | <b>1130.4861</b> |
| 5  | 102.0550        | 485.2718        | 468.2453  | 467.2613        | <b>513.2667</b>  | 496.2402  | 495.2562         | 427.2663  |           | E    | 959.4330  | 958.4377  |          | <b>1033.4697</b> | 1016.4432        |
| 6  | <b>110.0713</b> | <b>622.3307</b> | 605.3042  | <b>604.3202</b> | <b>650.3256</b>  | 633.2991  | 632.3151         |           |           | H    | 822.3741  |           |          | <b>904.4272</b>  | <b>887.4006</b>  |
| 7  | 136.0757        | <b>785.3941</b> | 768.3675  | <b>767.3835</b> | <b>813.3890</b>  | 796.3624  | 795.3784         |           |           | Y    | 659.3107  |           |          | <b>767.3682</b>  | 750.3417         |
| 8  | 102.0550        | 914.4367        | 897.4101  | 896.4261        | <b>942.4316</b>  | 925.4050  | 924.4210         | 856.4312  |           | E    | 530.2681  | 529.2729  |          | <b>604.3049</b>  | 587.2784         |
| 9  | 74.0600         | 1015.4843       | 998.4578  | 997.4738        | <b>1043.4793</b> | 1026.4527 | <b>1025.4687</b> | 999.4894  | 1001.4687 | T    | 429.2205  | 442.2409  | 444.2201 | <b>475.2623</b>  | 458.2358         |
| 10 | 44.0495         | 1086.5214       | 1069.4949 | 1068.5109       | <b>1114.5164</b> | 1097.4898 | 1096.5058        |           |           | A    | 358.1833  |           |          | <b>374.2146</b>  | 357.1881         |
| 11 | 101.0709        | 1214.5800       | 1197.5535 | 1196.5695       | <b>1242.5749</b> | 1225.5484 | 1224.5644        | 1157.5586 |           | Q    | 230.1248  | 229.1295  |          | <b>303.1775</b>  | 286.1510         |
| 12 | 129.1135        |                 |           |                 |                  |           |                  |           |           | R    | 74.0237   | 73.0284   |          | <b>175.1190</b>  | 158.0924         |

| Seq    | ya              | yb              | Seq     | ya       | yb              | Seq   | ya              | yb              |
|--------|-----------------|-----------------|---------|----------|-----------------|-------|-----------------|-----------------|
| VG     | 129.1022        | 157.0972        | VG N    | 243.1452 | 271.1401        | VG NE | 372.1878        | 400.1827        |
| VG NEH | <b>509.2467</b> | <b>537.2416</b> | VG NEHY | 672.3100 | 700.3049        | GN    | 144.0768        | 172.0717        |
| GNE    | <b>273.1193</b> | <b>301.1143</b> | GNEH    | 410.1783 | <b>438.1732</b> | GNEHY | 573.2416        | 601.2365        |
| NE     | 216.0979        | 244.0928        | NEH     | 353.1568 | 381.1517        | NEHY  | 516.2201        | 544.2150        |
| NEHYE  | 645.2627        | 673.2576        | EH      | 239.1139 | <b>267.1088</b> | EHY   | 402.1772        | <b>430.1721</b> |
| EHYE   | 531.2198        | 559.2147        | EHYET   | 632.2675 | 660.2624        | HY    | <b>273.1346</b> | <b>301.1295</b> |
| HYE    | 402.1772        | <b>430.1721</b> | HYET    | 503.2249 | 531.2198        | HYETA | 574.2620        | 602.2569        |
| YE     | 265.1183        | 293.1132        | YET     | 366.1660 | 394.1609        | YETA  | 437.2031        | 465.1980        |
| YETAQ  | 565.2617        | 593.2566        | ET      | 203.1026 | 231.0975        | ETA   | 274.1397        | 302.1347        |

|                      |          |                          |                    |          |          |                     |                          |                          |
|----------------------|----------|--------------------------|--------------------|----------|----------|---------------------|--------------------------|--------------------------|
| <a href="#">ETAQ</a> | 402.1983 | <a href="#">430.1932</a> | <a href="#">TA</a> | 145.0972 | 173.0921 | <a href="#">TAQ</a> | <a href="#">273.1557</a> | <a href="#">301.1506</a> |
| <a href="#">AQ</a>   | 172.1081 | 200.1030                 |                    |          |          |                     |                          |                          |

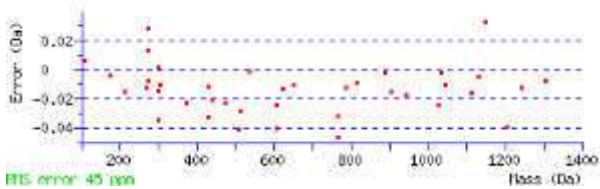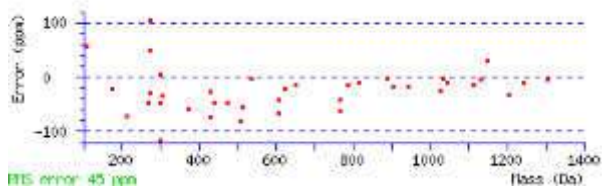

NCBI BLAST search of [IVGNEHYETAQR](#)

(Parameters: blastp, nr protein database, expect=20000, no filter, PAM30)

Other BLAST [web gateways](#)

All matches to this query

| Score | Mr(calc)  | Delta   | Sequence                     |
|-------|-----------|---------|------------------------------|
| 95.3  | 1415.6793 | 0.0867  | <a href="#">IVGNEHYETAQR</a> |
| 95.3  | 1415.6793 | 0.0867  | <a href="#">IVGNEHYETAQR</a> |
| 78.0  | 1415.7157 | 0.0503  | <a href="#">IVGDKHYETAQR</a> |
| 78.0  | 1415.7157 | 0.0503  | <a href="#">IVGDKHYETAQR</a> |
| 78.0  | 1415.6793 | 0.0867  | <a href="#">IVGDOHYETAQR</a> |
| 78.0  | 1415.6793 | 0.0867  | <a href="#">IVGENHYETAQR</a> |
| 78.0  | 1415.6793 | 0.0867  | <a href="#">IVGENHYETAQR</a> |
| 78.0  | 1415.7157 | 0.0503  | <a href="#">IVGKDHYETAQR</a> |
| 78.0  | 1415.7157 | 0.0503  | <a href="#">IVGKDHYETAQR</a> |
| 39.4  | 1416.6633 | -0.8973 | <a href="#">IVGDEHYETAQR</a> |

Mascot: <http://www.matrixscience.com/>


**Mascot Search Results**
**Peptide View Spot no 87**
MS/MS Fragmentation of **FVQAGSEVSALLGR**Found in **gi11466794** in **NCBIInr**, ATP synthase CF1 beta subunit [Oryza sativa Japonica Group]

Match to Query 14: 1432.848424 from(1433.855700,1+) intensity(0.0000) index(7)

Title: Label: D11, Spot\_Id: 216640, Peak\_List\_Id: 221233, MSMS Job\_Run\_Id: 21346, Comment:

Data file C:\Documents and Settings\Administrator\Desktop\farah BHU\RAJESH\12-1-13 raj\ppw\_D11\_135997699500.txt

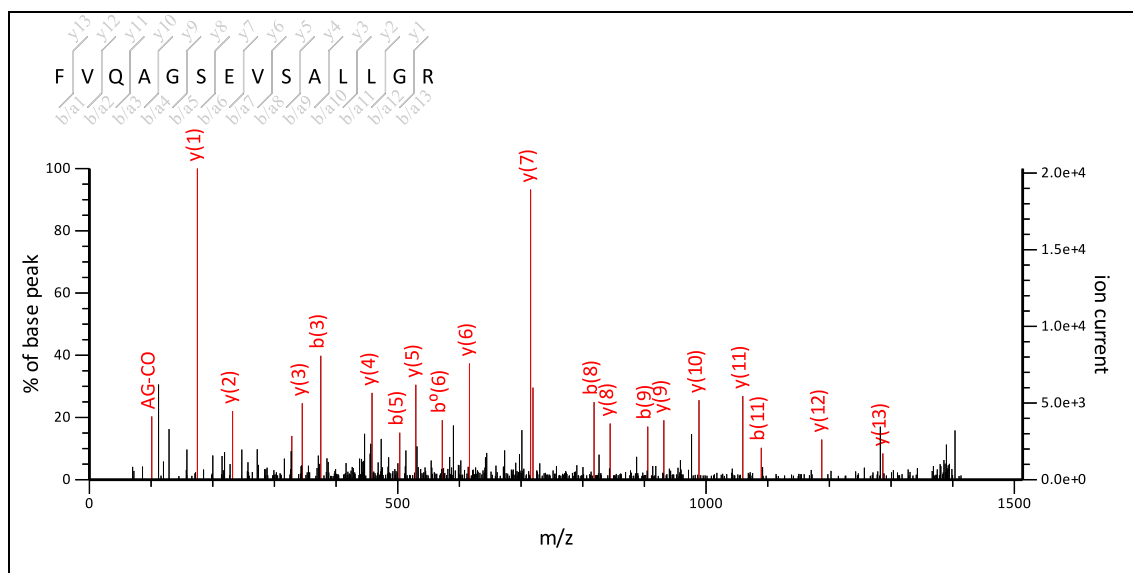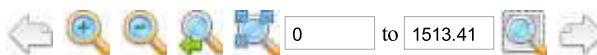Label all possible matches  Label matches used for scoring 

Monoisotopic mass of neutral peptide Mr(calc): 1432.7674

Fixed modifications: Carbamidomethyl (C) (apply to specified residues or termini only)

Ions Score: 131 Expect: 4.9e-10

Matches : 34/243 fragment ions using 28 most intense peaks ([help](#))

| #  | Immon.   | a         | a*        | a <sup>0</sup> | b         | b*        | b <sup>0</sup> | d         | Seq. | v         | w         | y         | y*        | y <sup>0</sup> | #  |
|----|----------|-----------|-----------|----------------|-----------|-----------|----------------|-----------|------|-----------|-----------|-----------|-----------|----------------|----|
| 1  | 120.0808 | 120.0808  |           |                | 148.0757  |           |                | 44.0495   | F    |           |           |           |           |                | 14 |
| 2  | 72.0808  | 219.1492  |           |                | 247.1441  |           |                | 205.1335  | V    | 1242.6437 | 1255.6641 | 1286.7063 | 1269.6797 | 1268.6957      | 13 |
| 3  | 101.0709 | 347.2078  | 330.1812  |                | 375.2027  | 358.1761  |                | 290.1863  | Q    | 1114.5851 | 1113.5899 | 1187.6379 | 1170.6113 | 1169.6273      | 12 |
| 4  | 44.0495  | 418.2449  | 401.2183  |                | 446.2398  | 429.2132  |                |           | A    | 1043.5480 |           | 1059.5793 | 1042.5527 | 1041.5687      | 11 |
| 5  | 30.0338  | 475.2663  | 458.2398  |                | 503.2613  | 486.2347  |                |           | G    |           |           | 988.5422  | 971.5156  | 970.5316       | 10 |
| 6  | 60.0444  | 562.2984  | 545.2718  | 544.2878       | 590.2933  | 573.2667  | 572.2827       | 546.3035  | S    | 899.4945  | 898.4993  | 931.5207  | 914.4942  | 913.5102       | 9  |
| 7  | 102.0550 | 691.3410  | 674.3144  | 673.3304       | 719.3359  | 702.3093  | 701.3253       | 633.3355  | E    | 770.4519  | 769.4567  | 844.4887  | 827.4621  | 826.4781       | 8  |
| 8  | 72.0808  | 790.4094  | 773.3828  | 772.3988       | 818.4043  | 801.3777  | 800.3937       | 776.3937  | V    | 671.3835  | 684.4039  | 715.4461  | 698.4196  | 697.4355       | 7  |
| 9  | 60.0444  | 877.4414  | 860.4149  | 859.4308       | 905.4363  | 888.4098  | 887.4258       | 861.4465  | S    | 584.3515  | 583.3562  | 616.3777  | 599.3511  | 598.3671       | 6  |
| 10 | 44.0495  | 948.4785  | 931.4520  | 930.4680       | 976.4734  | 959.4469  | 958.4629       |           | A    | 513.3144  |           | 529.3457  | 512.3191  |                | 5  |
| 11 | 86.0964  | 1061.5626 | 1044.5360 | 1043.5520      | 1089.5575 | 1072.5310 | 1071.5469      | 1019.5156 | L    | 400.2303  | 399.2350  | 458.3085  | 441.2820  |                | 4  |
| 12 | 86.0964  | 1174.6466 | 1157.6201 | 1156.6361      | 1202.6416 | 1185.6150 | 1184.6310      | 1132.5997 | L    | 287.1462  | 286.1510  | 345.2245  | 328.1979  |                | 3  |
| 13 | 30.0338  | 1231.6681 | 1214.6416 | 1213.6575      | 1259.6630 | 1242.6365 | 1241.6525      |           | G    |           |           | 232.1404  | 215.1139  |                | 2  |
| 14 | 129.1135 |           |           |                |           |           |                |           | R    | 74.0237   | 73.0284   | 175.1190  | 158.0924  |                | 1  |

| Seq   | ya       | yb       | Seq    | ya       | yb       | Seq     | ya       | yb       |
|-------|----------|----------|--------|----------|----------|---------|----------|----------|
| VQ    | 200.1394 | 228.1343 | VQA    | 271.1765 | 299.1714 | VQAG    | 328.1979 | 356.1928 |
| VQAGS | 415.2300 | 443.2249 | VQAGSE | 544.2726 | 572.2675 | VQAGSEV | 643.3410 | 671.3359 |
| QA    | 172.1081 | 200.1030 | QAG    | 229.1295 | 257.1244 | QAGS    | 316.1615 | 344.1565 |
| QAGSE | 445.2041 | 473.1991 | QAGSEV | 544.2726 | 572.2675 | QAGSEVS | 631.3046 | 659.2995 |

|                          |                          |                          |                        |                          |                          |                         |                          |                          |
|--------------------------|--------------------------|--------------------------|------------------------|--------------------------|--------------------------|-------------------------|--------------------------|--------------------------|
| <a href="#">AG</a>       | <a href="#">101.0709</a> | <a href="#">129.0659</a> | <a href="#">AGS</a>    | <a href="#">188.1030</a> | <a href="#">216.0979</a> | <a href="#">AGSE</a>    | <a href="#">317.1456</a> | <a href="#">345.1405</a> |
| <a href="#">AGSEV</a>    | <a href="#">416.2140</a> | <a href="#">444.2089</a> | <a href="#">AGSEVS</a> | <a href="#">503.2460</a> | <a href="#">531.2409</a> | <a href="#">AGSEVSA</a> | <a href="#">574.2831</a> | <a href="#">602.2780</a> |
| <a href="#">AGSEVSAL</a> | <a href="#">687.3672</a> | <a href="#">715.3621</a> | <a href="#">GS</a>     | <a href="#">117.0659</a> | <a href="#">145.0608</a> | <a href="#">GSE</a>     | <a href="#">246.1084</a> | <a href="#">274.1034</a> |
| <a href="#">GSEV</a>     | <a href="#">345.1769</a> | <a href="#">373.1718</a> | <a href="#">GSEVS</a>  | <a href="#">432.2089</a> | <a href="#">460.2038</a> | <a href="#">GSEVSA</a>  | <a href="#">503.2460</a> | <a href="#">531.2409</a> |
| <a href="#">GSEVSAL</a>  | <a href="#">616.3301</a> | <a href="#">644.3250</a> | <a href="#">SE</a>     | <a href="#">189.0870</a> | <a href="#">217.0819</a> | <a href="#">SEV</a>     | <a href="#">288.1554</a> | <a href="#">316.1503</a> |
| <a href="#">SEVS</a>     | <a href="#">375.1874</a> | <a href="#">403.1823</a> | <a href="#">SEVSA</a>  | <a href="#">446.2245</a> | <a href="#">474.2195</a> | <a href="#">SEVSAL</a>  | <a href="#">559.3086</a> | <a href="#">587.3035</a> |
| <a href="#">SEVSALL</a>  | <a href="#">672.3927</a> | <a href="#">700.3876</a> | <a href="#">EV</a>     | <a href="#">201.1234</a> | <a href="#">229.1183</a> | <a href="#">EVS</a>     | <a href="#">288.1554</a> | <a href="#">316.1503</a> |
| <a href="#">EVSA</a>     | <a href="#">359.1925</a> | <a href="#">387.1874</a> | <a href="#">EVSAL</a>  | <a href="#">472.2766</a> | <a href="#">500.2715</a> | <a href="#">EVSALL</a>  | <a href="#">585.3606</a> | <a href="#">613.3556</a> |
| <a href="#">EVSALLG</a>  | <a href="#">642.3821</a> | <a href="#">670.3770</a> | <a href="#">VS</a>     | <a href="#">159.1128</a> | <a href="#">187.1077</a> | <a href="#">VSA</a>     | <a href="#">230.1499</a> | <a href="#">258.1448</a> |
| <a href="#">VSAL</a>     | <a href="#">343.2340</a> | <a href="#">371.2289</a> | <a href="#">VSALL</a>  | <a href="#">456.3180</a> | <a href="#">484.3130</a> | <a href="#">VSALLG</a>  | <a href="#">513.3395</a> | <a href="#">541.3344</a> |
| <a href="#">SA</a>       | <a href="#">131.0815</a> | <a href="#">159.0764</a> | <a href="#">SAL</a>    | <a href="#">244.1656</a> | <a href="#">272.1605</a> | <a href="#">SALL</a>    | <a href="#">357.2496</a> | <a href="#">385.2445</a> |
| <a href="#">SALLG</a>    | <a href="#">414.2711</a> | <a href="#">442.2660</a> | <a href="#">AL</a>     | <a href="#">157.1335</a> | <a href="#">185.1285</a> | <a href="#">ALL</a>     | <a href="#">270.2176</a> | <a href="#">298.2125</a> |
| <a href="#">ALLG</a>     | <a href="#">327.2391</a> | <a href="#">355.2340</a> | <a href="#">LL</a>     | <a href="#">199.1805</a> | <a href="#">227.1754</a> | <a href="#">LLG</a>     | <a href="#">256.2020</a> | <a href="#">284.1969</a> |
| <a href="#">LG</a>       | <a href="#">143.1179</a> | <a href="#">171.1128</a> |                        |                          |                          |                         |                          |                          |

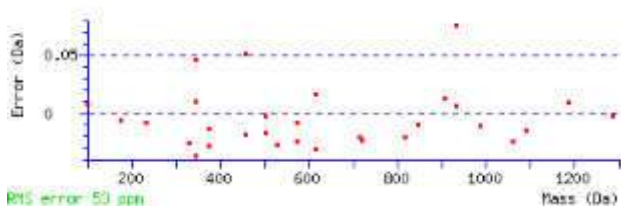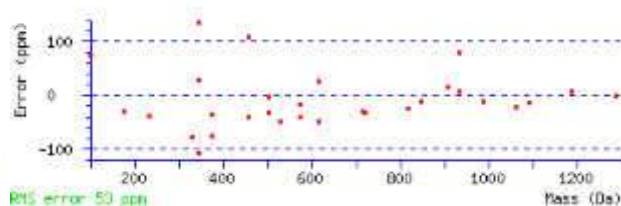

NCBI BLAST search of [FVOAGSEVSALLGR](#)  
 (Parameters: blastp, nr protein database, expect=20000, no filter, PAM30)  
 Other BLAST [web gateways](#)

All matches to this query

| Score | Mr(calc)  | Delta  | Sequence                       |
|-------|-----------|--------|--------------------------------|
| 130.8 | 1432.7674 | 0.0810 | <a href="#">FVOAGSEVSAILGR</a> |
| 130.8 | 1432.7674 | 0.0810 | <a href="#">FVOAGSEVSALIGR</a> |
| 130.8 | 1432.7674 | 0.0810 | <a href="#">FVOAGSEVSALLGR</a> |
| 130.8 | 1432.7674 | 0.0810 | <a href="#">FVOAGSEVSALLGR</a> |
| 130.8 | 1432.7674 | 0.0810 | <a href="#">FVOAGSEVSALLGR</a> |
| 130.8 | 1432.7674 | 0.0810 | <a href="#">FVOAGSEVSALLGR</a> |
| 130.8 | 1432.7674 | 0.0810 | <a href="#">FVOAGSEVSALLGR</a> |
| 130.8 | 1432.7674 | 0.0810 | <a href="#">FVOAGSEVSALLGR</a> |
| 130.8 | 1432.7674 | 0.0810 | <a href="#">FVOAGSEVSALLGR</a> |
| 130.8 | 1432.7674 | 0.0810 | <a href="#">FVOAGSEVSALLGR</a> |
| 130.8 | 1432.7674 | 0.0810 | <a href="#">FVOAGSEVSALLGR</a> |

Mascot: <http://www.matrixscience.com/>



**MATRIX SCIENCE Mascot Search Results**

**Peptide View Spot no 87**

MS/MS Fragmentation of **VGLTALTMAEYFR**

Found in **gi11466794** in **NCBI**nr, ATP synthase CF1 beta subunit [Oryza sativa Japonica Group]

Match to Query 16: 1470.840124 from(1471.847400,1+) intensity(0.0000) index(8)

Title: Label: D11, Spot\_Id: 216640, Peak\_List\_Id: 221227, MSMS Job\_Run\_Id: 21346, Comment:

Data file C:\Documents and Settings\Administrator\Desktop\farah BHU\RAJESH\12-1-13 raj\ppw\_D11\_135997699500.txt

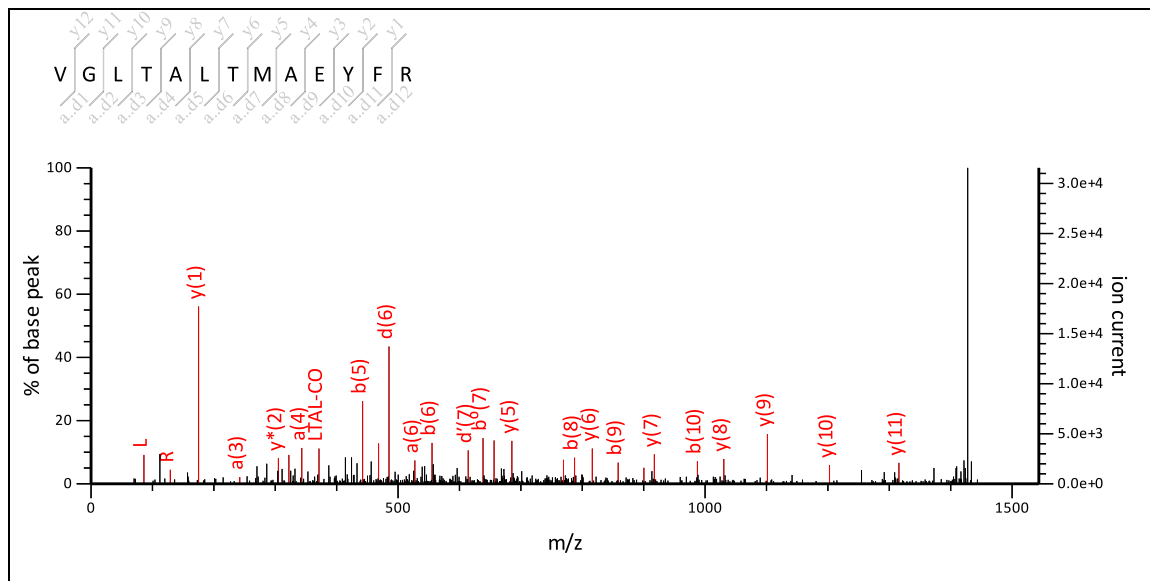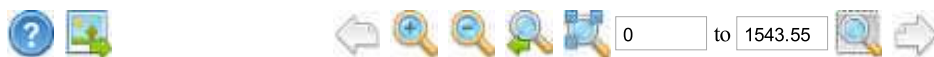

Label all possible matches  Label matches used for scoring

Monoisotopic mass of neutral peptide Mr(calc): 1470.7541

Fixed modifications: Carbamidomethyl (C) (apply to specified residues or termini only)

Ions Score: 88 Expect: 9.3e-06

Matches : 36/198 fragment ions using 42 most intense peaks ([help](#))

| #  | Immon.          | a               | a <sup>0</sup> | b               | b <sup>0</sup>  | d               | d'              | Seq. | v         | w         | w'        | y                | y*              | y <sup>0</sup> | #  |
|----|-----------------|-----------------|----------------|-----------------|-----------------|-----------------|-----------------|------|-----------|-----------|-----------|------------------|-----------------|----------------|----|
| 1  | 72.0808         | 72.0808         |                | 100.0757        |                 | 44.0495         |                 | V    |           |           |           |                  |                 |                | 13 |
| 2  | 30.0338         | <b>129.1022</b> |                | 157.0972        |                 |                 |                 | G    |           |           |           | 1372.6930        | 1355.6664       | 1354.6824      | 12 |
| 3  | <b>86.0964</b>  | <b>242.1863</b> |                | 270.1812        |                 | 200.1394        |                 | L    | 1257.5932 | 1256.5980 |           | <b>1315.6715</b> | 1298.6449       | 1297.6609      | 11 |
| 4  | 74.0600         | <b>343.2340</b> | 325.2234       | <b>371.2289</b> | 353.2183        | 327.2391        | 329.2183        | T    | 1156.5456 | 1169.5660 | 1171.5452 | <b>1202.5874</b> | 1185.5609       | 1184.5769      | 10 |
| 5  | 44.0495         | 414.2711        | 396.2605       | <b>442.2660</b> | 424.2554        |                 |                 | A    | 1085.5084 |           |           | <b>1101.5397</b> | 1084.5132       | 1083.5292      | 9  |
| 6  | <b>86.0964</b>  | <b>527.3552</b> | 509.3446       | <b>555.3501</b> | 537.3395        | <b>485.3082</b> |                 | L    | 972.4244  | 971.4291  |           | <b>1030.5026</b> | 1013.4761       | 1012.4921      | 8  |
| 7  | 74.0600         | 628.4028        | 610.3923       | <b>656.3978</b> | <b>638.3872</b> | 612.4079        | <b>614.3872</b> | T    | 871.3767  | 884.3971  | 886.3764  | <b>917.4186</b>  | <b>900.3920</b> | 899.4080       | 7  |
| 8  | 104.0528        | 759.4433        | 741.4328       | <b>787.4382</b> | <b>769.4277</b> | 699.4400        |                 | M    | 740.3362  | 739.3410  |           | <b>816.3709</b>  | 799.3443        | 798.3603       | 6  |
| 9  | 44.0495         | 830.4804        | 812.4699       | <b>858.4754</b> | 840.4648        |                 |                 | A    | 669.2991  |           |           | <b>685.3304</b>  | 668.3039        | 667.3198       | 5  |
| 10 | 102.0550        | 959.5230        | 941.5125       | <b>987.5179</b> | 969.5074        | 901.5176        |                 | E    | 540.2565  | 539.2613  |           | <b>614.2933</b>  | 597.2667        | 596.2827       | 4  |
| 11 | 136.0757        | 1122.5864       | 1104.5758      | 1150.5813       | 1132.5707       |                 |                 | Y    | 377.1932  |           |           | <b>485.2507</b>  | <b>468.2241</b> |                | 3  |
| 12 | 120.0808        | 1269.6548       | 1251.6442      | 1297.6497       | 1279.6391       |                 |                 | F    | 230.1248  |           |           | <b>322.1874</b>  | <b>305.1608</b> |                | 2  |
| 13 | <b>129.1135</b> |                 |                |                 |                 |                 |                 | R    | 74.0237   | 73.0284   |           | <b>175.1190</b>  | 158.0924        |                | 1  |

| Seq   | ya       | yb       | Seq    | ya       | yb       | Seq     | ya              | yb              |
|-------|----------|----------|--------|----------|----------|---------|-----------------|-----------------|
| GL    | 143.1179 | 171.1128 | GLT    | 244.1656 | 272.1605 | GLTA    | 315.2027        | <b>343.1976</b> |
| GLTAL | 428.2867 | 456.2817 | GLTALT | 529.3344 | 557.3293 | GLTALTM | 660.3749        | 688.3698        |
| LT    | 187.1441 | 215.1390 | LTA    | 258.1812 | 286.1761 | LTAL    | <b>371.2653</b> | 399.2602        |
| LTALT | 472.3130 | 500.3079 | LTALTM | 603.3534 | 631.3484 | LTALTMA | 674.3906        | 702.3855        |

|               |          |          |               |          |          |                |          |          |
|---------------|----------|----------|---------------|----------|----------|----------------|----------|----------|
| <b>TA</b>     | 145.0972 | 173.0921 | <b>TAL</b>    | 258.1812 | 286.1761 | <b>TALT</b>    | 359.2289 | 387.2238 |
| <b>TALTM</b>  | 490.2694 | 518.2643 | <b>TALTMA</b> | 561.3065 | 589.3014 | <b>TALTMAE</b> | 690.3491 | 718.3440 |
| <b>AL</b>     | 157.1335 | 185.1285 | <b>ALT</b>    | 258.1812 | 286.1761 | <b>ALTM</b>    | 389.2217 | 417.2166 |
| <b>ALTMA</b>  | 460.2588 | 488.2537 | <b>ALTMAE</b> | 589.3014 | 617.2963 | <b>LT</b>      | 187.1441 | 215.1390 |
| <b>LTM</b>    | 318.1846 | 346.1795 | <b>LTMA</b>   | 389.2217 | 417.2166 | <b>LTMAE</b>   | 518.2643 | 546.2592 |
| <b>LTMAEY</b> | 681.3276 | 709.3225 | <b>TM</b>     | 205.1005 | 233.0954 | <b>TMA</b>     | 276.1376 | 304.1326 |
| <b>TMAE</b>   | 405.1802 | 433.1751 | <b>TMAEY</b>  | 568.2436 | 596.2385 | <b>MA</b>      | 175.0900 | 203.0849 |
| <b>MAE</b>    | 304.1326 | 332.1275 | <b>MAEY</b>   | 467.1959 | 495.1908 | <b>MAEYF</b>   | 614.2643 | 642.2592 |
| <b>AE</b>     | 173.0921 | 201.0870 | <b>AEY</b>    | 336.1554 | 364.1503 | <b>AEYF</b>    | 483.2238 | 511.2187 |
| <b>EY</b>     | 265.1183 | 293.1132 | <b>EYF</b>    | 412.1867 | 440.1816 | <b>YF</b>      | 283.1441 | 311.1390 |

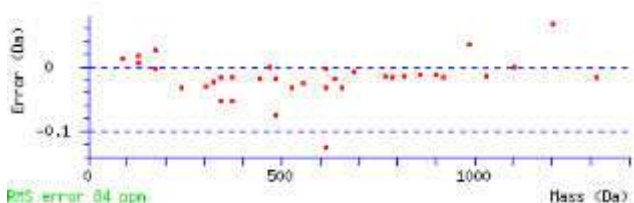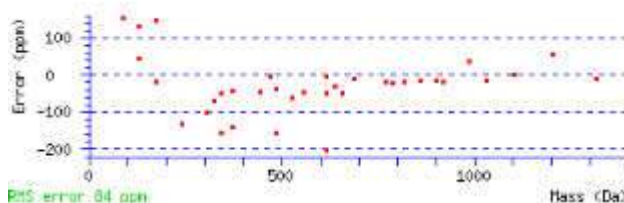

NCBI BLAST search of [VGLTALTMAEYFR](#)

(Parameters: blastp, nr protein database, expect=20000, no filter, PAM30)

Other BLAST [web gateways](#)

All matches to this query

| Score | Mr(calc)  | Delta  | Sequence                      |
|-------|-----------|--------|-------------------------------|
| 88.0  | 1470.7541 | 0.0861 | <a href="#">VGLTALTMAEYFR</a> |
| 88.0  | 1470.7541 | 0.0861 | <a href="#">VGLTALTMAEYFR</a> |
| 88.0  | 1470.7541 | 0.0861 | <a href="#">VGLTALTMAEYFR</a> |
| 88.0  | 1470.7541 | 0.0861 | <a href="#">VGLTALTMAEYFR</a> |
| 88.0  | 1470.7541 | 0.0861 | <a href="#">VGLTALTMAEYFR</a> |
| 88.0  | 1470.7541 | 0.0861 | <a href="#">VGLTALTMAEYFR</a> |
| 88.0  | 1470.7541 | 0.0861 | <a href="#">VGLTALTMAEYFR</a> |
| 88.0  | 1470.7541 | 0.0861 | <a href="#">VGLTALTMAEYFR</a> |
| 88.0  | 1470.7541 | 0.0861 | <a href="#">VGLTALTMAEYFR</a> |
| 88.0  | 1470.7541 | 0.0861 | <a href="#">VGLTALTMAEYFR</a> |
| 88.0  | 1470.7541 | 0.0861 | <a href="#">VGLTALTMAEYFR</a> |

Mascot: <http://www.matrixscience.com/>


**Mascot Search Results**
**Peptide View Spot no 87**
MS/MS Fragmentation of **TREGNDLYMEMK**Found in **gi11466794** in **NCBInr**, ATP synthase CF1 beta subunit [Oryza sativa Japonica Group]

Match to Query 18: 1485.767524 from(1486.774800,1+) intensity(0.0000) index(9)

Title: Label: D11, Spot\_Id: 216640, Peak\_List\_Id: 221236, MSMS Job\_Run\_Id: 21346, Comment:

Data file C:\Documents and Settings\Administrator\Desktop\farah BHU\RAJESH\12-1-13 raj\ppw\_D11\_135997699500.txt

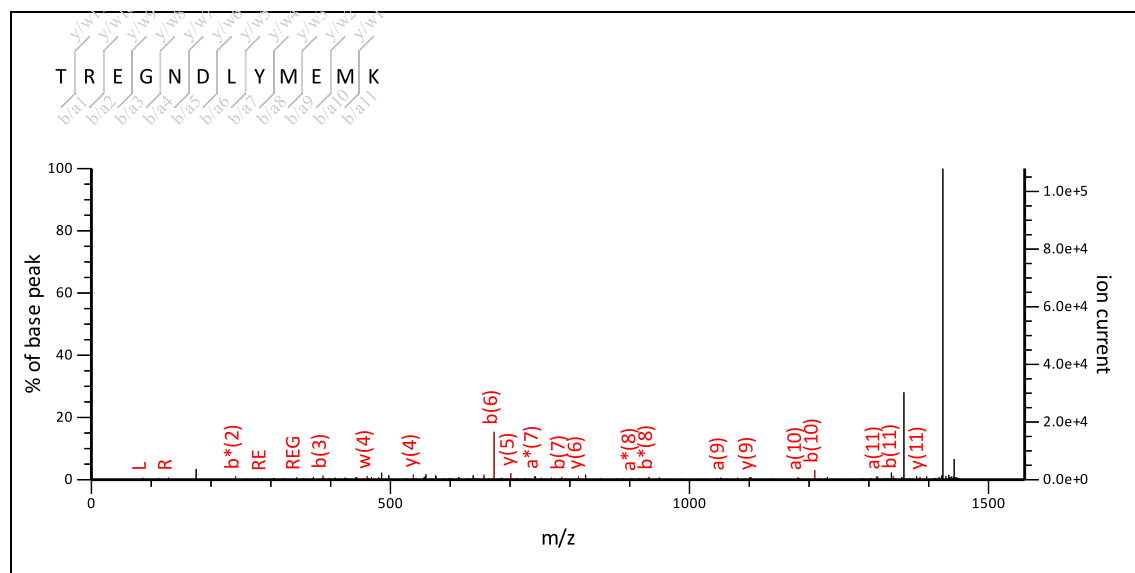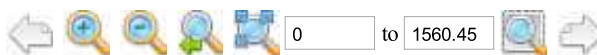Label all possible matches  Label matches used for scoring 

Monoisotopic mass of neutral peptide Mr(calc): 1485.6592

Fixed modifications: Carbamidomethyl (C) (apply to specified residues or termini only)

Ions Score: 42 Expect: 0.41

Matches : 47/201 fragment ions using 95 most intense peaks ([help](#))

| #  | Immon.   | a         | a*        | a <sup>0</sup> | b         | b*        | b <sup>0</sup> | d         | Seq. | v         | w         | y         | y*        | y <sup>0</sup> | #  |
|----|----------|-----------|-----------|----------------|-----------|-----------|----------------|-----------|------|-----------|-----------|-----------|-----------|----------------|----|
| 1  | 74.0600  | 74.0600   |           | 56.0495        | 102.0550  |           | 84.0444        | 44.0495   | T    |           |           |           |           |                | 12 |
| 2  | 129.1135 | 230.1612  | 213.1346  | 212.1506       | 258.1561  | 241.1295  | 240.1455       | 145.0972  | R    | 1284.5235 | 1283.5283 | 1385.6188 | 1368.5922 | 1367.6082      | 11 |
| 3  | 102.0550 | 359.2037  | 342.1772  | 341.1932       | 387.1987  | 370.1721  | 369.1881       | 301.1983  | E    | 1155.4809 | 1154.4857 | 1229.5177 | 1212.4911 | 1211.5071      | 10 |
| 4  | 30.0338  | 416.2252  | 399.1987  | 398.2146       | 444.2201  | 427.1936  | 426.2096       |           | G    |           |           | 1100.4751 | 1083.4485 | 1082.4645      | 9  |
| 5  | 87.0553  | 530.2681  | 513.2416  | 512.2576       | 558.2631  | 541.2365  | 540.2525       | 487.2623  | N    | 984.4165  | 983.4213  | 1043.4536 | 1026.4271 | 1025.4431      | 8  |
| 6  | 88.0393  | 645.2951  | 628.2685  | 627.2845       | 673.2900  | 656.2634  | 655.2794       | 601.3052  | D    | 869.3896  | 868.3943  | 929.4107  | 912.3842  | 911.4001       | 7  |
| 7  | 86.0964  | 758.3791  | 741.3526  | 740.3686       | 786.3741  | 769.3475  | 768.3635       | 716.3322  | L    | 756.3055  | 755.3103  | 814.3838  | 797.3572  | 796.3732       | 6  |
| 8  | 136.0757 | 921.4425  | 904.4159  | 903.4319       | 949.4374  | 932.4108  | 931.4268       |           | Y    | 593.2422  |           | 701.2997  | 684.2731  | 683.2891       | 5  |
| 9  | 104.0528 | 1052.4830 | 1035.4564 | 1034.4724      | 1080.4779 | 1063.4513 | 1062.4673      | 992.4796  | M    | 462.2017  | 461.2064  | 538.2364  | 521.2098  | 520.2258       | 4  |
| 10 | 102.0550 | 1181.5255 | 1164.4990 | 1163.5150      | 1209.5205 | 1192.4939 | 1191.5099      | 1123.5201 | E    | 333.1591  | 332.1639  | 407.1959  | 390.1693  | 389.1853       | 3  |
| 11 | 104.0528 | 1312.5660 | 1295.5395 | 1294.5555      | 1340.5609 | 1323.5344 | 1322.5504      | 1252.5627 | M    | 202.1186  | 201.1234  | 278.1533  | 261.1267  |                | 2  |
| 12 | 101.1073 |           |           |                |           |           |                |           | K    | 74.0237   | 73.0284   | 147.1128  | 130.0863  |                | 1  |

| Seq    | ya       | yb       | Seq    | ya       | yb       | Seq    | ya       | yb       |
|--------|----------|----------|--------|----------|----------|--------|----------|----------|
| RE     | 258.1561 | 286.1510 | REG    | 315.1775 | 343.1724 | REGN   | 429.2205 | 457.2154 |
| REGND  | 544.2474 | 572.2423 | REGNDL | 657.3315 | 685.3264 | EG     | 159.0764 | 187.0713 |
| EGN    | 273.1193 | 301.1143 | EGND   | 388.1463 | 416.1412 | EGNDL  | 501.2304 | 529.2253 |
| EGNDLY | 664.2937 | 692.2886 | GN     | 144.0768 | 172.0717 | GND    | 259.1037 | 287.0986 |
| GNDL   | 372.1878 | 400.1827 | GNDLY  | 535.2511 | 563.2460 | GNDLYM | 666.2916 | 694.2865 |
| ND     | 202.0822 | 230.0771 | NDL    | 315.1663 | 343.1612 | NDLY   | 478.2296 | 506.2245 |

|              |          |          |              |          |          |              |          |          |
|--------------|----------|----------|--------------|----------|----------|--------------|----------|----------|
| <b>NDLYM</b> | 609.2701 | 637.2650 | <b>DL</b>    | 201.1234 | 229.1183 | <b>DLY</b>   | 364.1867 | 392.1816 |
| <b>DLYM</b>  | 495.2272 | 523.2221 | <b>DLYME</b> | 624.2698 | 652.2647 | <b>LY</b>    | 249.1598 | 277.1547 |
| <b>LYM</b>   | 380.2002 | 408.1952 | <b>LYME</b>  | 509.2428 | 537.2377 | <b>LYMEM</b> | 640.2833 | 668.2782 |
| <b>YM</b>    | 267.1162 | 295.1111 | <b>YME</b>   | 396.1588 | 424.1537 | <b>YMEM</b>  | 527.1993 | 555.1942 |
| <b>ME</b>    | 233.0954 | 261.0904 | <b>MEM</b>   | 364.1359 | 392.1308 | <b>EM</b>    | 233.0954 | 261.0904 |

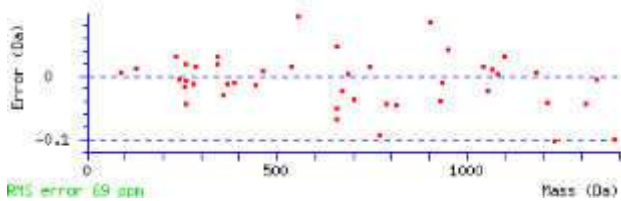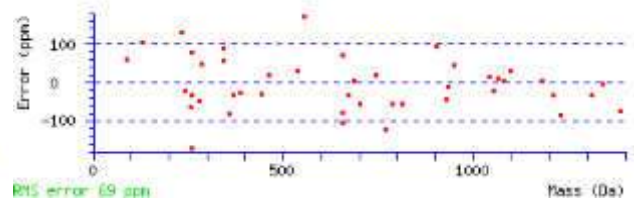

NCBI BLAST search of [TREGNDLYMEMK](#)

(Parameters: blastp, nr protein database, expect=20000, no filter, PAM30)

Other BLAST [web gateways](#)

#### All matches to this query

| Score | Mr(calc)  | Delta  | Sequence                     |
|-------|-----------|--------|------------------------------|
| 41.7  | 1485.6592 | 0.1084 | <a href="#">TREGNDLYMEMK</a> |
| 41.7  | 1485.6592 | 0.1084 | <a href="#">TREGNDLYMEMK</a> |
| 41.7  | 1485.6592 | 0.1084 | <a href="#">TREGNDLYMEMK</a> |
| 41.7  | 1485.6592 | 0.1084 | <a href="#">TREGNDLYMEMK</a> |
| 41.7  | 1485.6592 | 0.1084 | <a href="#">TREGNDLYMEMK</a> |
| 41.7  | 1485.6592 | 0.1084 | <a href="#">TREGNDLYMEMK</a> |
| 41.7  | 1485.6592 | 0.1084 | <a href="#">TREGNDLYMEMK</a> |
| 41.7  | 1485.6592 | 0.1084 | <a href="#">TREGNDLYMEMK</a> |
| 41.7  | 1485.6592 | 0.1084 | <a href="#">TREGNDLYMEMK</a> |
| 41.7  | 1485.6592 | 0.1084 | <a href="#">TREGNDLYMEMK</a> |
| 35.4  | 1485.6262 | 0.1414 | <a href="#">TREGNDLMMEMK</a> |

Mascot: <http://www.matrixscience.com/>

**MATRIX SCIENCE Mascot Search Results**

**Peptide View Spot no 87**

MS/MS Fragmentation of **VALVYQMNEPPGAR**

Found in **gi11466794** in **NCBI**nr, ATP synthase CF1 beta subunit [Oryza sativa Japonica Group]

Match to Query 20: 1600.889724 from(1601.897000,1+) intensity(0.0000) index(10)

Title: Label: D11, Spot\_Id: 216640, Peak\_List\_Id: 221229, MSMS Job\_Run\_Id: 21346, Comment:

Data file C:\Documents and Settings\Administrator\Desktop\farah BHU\RAJESH\12-1-13 raj\ppw\_D11\_135997699500.txt

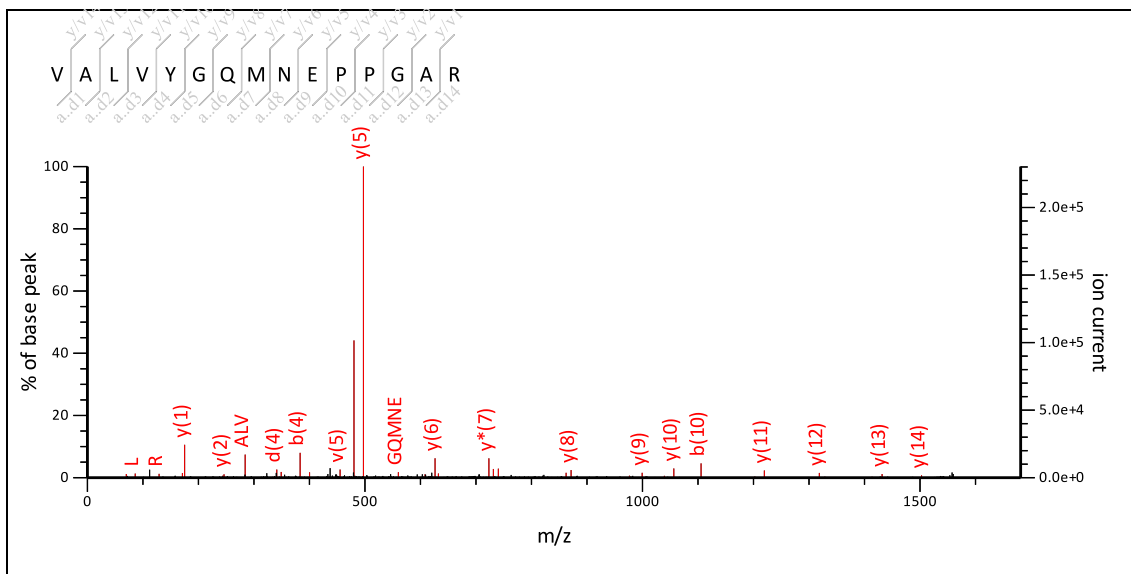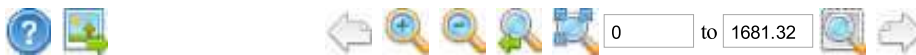

Label all possible matches  Label matches used for scoring

Monoisotopic mass of neutral peptide Mr(calc): 1600.8031

Fixed modifications: Carbamidomethyl (C) (apply to specified residues or termini only)

Ions Score: 100 Expect: 5.6e-07

Matches : 48/237 fragment ions using 61 most intense peaks [\(help\)](#)

| #  | Immon.   | a         | a*        | a <sup>0</sup> | b         | b*        | b <sup>0</sup> | d         | Seq. | v         | w         | y         | y*        | y <sup>0</sup> | #  |
|----|----------|-----------|-----------|----------------|-----------|-----------|----------------|-----------|------|-----------|-----------|-----------|-----------|----------------|----|
| 1  | 72.0808  | 72.0808   |           |                | 100.0757  |           |                | 44.0495   | V    |           |           |           |           |                | 15 |
| 2  | 44.0495  | 143.1179  |           |                | 171.1128  |           |                |           | A    | 1486.7107 |           | 1502.7420 | 1485.7155 | 1484.7315      | 14 |
| 3  | 86.0964  | 256.2020  |           |                | 284.1969  |           |                | 214.1550  | L    | 1373.6267 | 1372.6314 | 1431.7049 | 1414.6784 | 1413.6943      | 13 |
| 4  | 72.0808  | 355.2704  |           |                | 383.2653  |           |                | 341.2547  | V    | 1274.5582 | 1287.5786 | 1318.6208 | 1301.5943 | 1300.6103      | 12 |
| 5  | 136.0757 | 518.3337  |           |                | 546.3286  |           |                |           | Y    | 1111.4949 |           | 1219.5524 | 1202.5259 | 1201.5419      | 11 |
| 6  | 30.0338  | 575.3552  |           |                | 603.3501  |           |                |           | G    |           |           | 1056.4891 | 1039.4626 | 1038.4785      | 10 |
| 7  | 101.0709 | 703.4137  | 686.3872  |                | 731.4087  | 714.3821  |                | 646.3923  | Q    | 926.4149  | 925.4196  | 999.4676  | 982.4411  | 981.4571       | 9  |
| 8  | 104.0528 | 834.4542  | 817.4277  |                | 862.4491  | 845.4226  |                | 774.4509  | M    | 795.3744  | 794.3791  | 871.4091  | 854.3825  | 853.3985       | 8  |
| 9  | 87.0553  | 948.4972  | 931.4706  |                | 976.4921  | 959.4655  |                | 905.4913  | N    | 681.3315  | 680.3362  | 740.3686  | 723.3420  | 722.3580       | 7  |
| 10 | 102.0550 | 1077.5397 | 1060.5132 | 1059.5292      | 1105.5347 | 1088.5081 | 1087.5241      | 1019.5343 | E    | 552.2889  | 551.2936  | 626.3257  | 609.2991  | 608.3151       | 6  |
| 11 | 70.0651  | 1174.5925 | 1157.5660 | 1156.5819      | 1202.5874 | 1185.5609 | 1184.5769      | 1148.5769 | P    | 455.2361  | 454.2409  | 497.2831  | 480.2565  |                | 5  |
| 12 | 70.0651  | 1271.6453 | 1254.6187 | 1253.6347      | 1299.6402 | 1282.6136 | 1281.6296      | 1245.6296 | P    | 358.1833  | 357.1881  | 400.2303  | 383.2037  |                | 4  |
| 13 | 30.0338  | 1328.6667 | 1311.6402 | 1310.6562      | 1356.6617 | 1339.6351 | 1338.6511      |           | G    |           |           | 303.1775  | 286.1510  |                | 3  |
| 14 | 44.0495  | 1399.7038 | 1382.6773 | 1381.6933      | 1427.6988 | 1410.6722 | 1409.6882      |           | A    | 230.1248  |           | 246.1561  | 229.1295  |                | 2  |
| 15 | 129.1135 |           |           |                |           |           |                |           | R    | 74.0237   | 73.0284   | 175.1190  | 158.0924  |                | 1  |

| Seq   | ya       | yb       | Seq    | ya       | yb       | Seq   | ya       | yb       |
|-------|----------|----------|--------|----------|----------|-------|----------|----------|
| AL    | 157.1335 | 185.1285 | ALV    | 256.2020 | 284.1969 | ALVY  | 419.2653 | 447.2602 |
| ALVYG | 476.2867 | 504.2817 | ALVYQG | 604.3453 | 632.3402 | LV    | 185.1648 | 213.1598 |
| LVY   | 348.2282 | 376.2231 | LVYG   | 405.2496 | 433.2445 | LVYQG | 533.3082 | 561.3031 |

|                       |          |                          |                        |          |                          |                         |          |                          |
|-----------------------|----------|--------------------------|------------------------|----------|--------------------------|-------------------------|----------|--------------------------|
| <a href="#">LVYGM</a> | 664.3487 | 692.3436                 | <a href="#">VY</a>     | 235.1441 | 263.1390                 | <a href="#">VYG</a>     | 292.1656 | 320.1605                 |
| <a href="#">VYQ</a>   | 420.2241 | 448.2191                 | <a href="#">VYGM</a>   | 551.2646 | 579.2595                 | <a href="#">VYGMN</a>   | 665.3076 | 693.3025                 |
| <a href="#">YG</a>    | 193.0972 | 221.0921                 | <a href="#">YQ</a>     | 321.1557 | <a href="#">349.1506</a> | <a href="#">YGM</a>     | 452.1962 | <a href="#">480.1911</a> |
| <a href="#">YGMN</a>  | 566.2391 | 594.2341                 | <a href="#">YGMNE</a>  | 695.2817 | 723.2767                 | <a href="#">GQ</a>      | 158.0924 | 186.0873                 |
| <a href="#">GM</a>    | 289.1329 | 317.1278                 | <a href="#">GMN</a>    | 403.1758 | 431.1707                 | <a href="#">GMNE</a>    | 532.2184 | <a href="#">560.2133</a> |
| <a href="#">GMNEP</a> | 629.2712 | 657.2661                 | <a href="#">QM</a>     | 232.1114 | 260.1063                 | <a href="#">QMN</a>     | 346.1544 | 374.1493                 |
| <a href="#">QMNE</a>  | 475.1969 | 503.1919                 | <a href="#">QMNEP</a>  | 572.2497 | 600.2446                 | <a href="#">QMNEPP</a>  | 669.3025 | 697.2974                 |
| <a href="#">MN</a>    | 218.0958 | <a href="#">246.0907</a> | <a href="#">MNE</a>    | 347.1384 | 375.1333                 | <a href="#">MNEP</a>    | 444.1911 | 472.1860                 |
| <a href="#">MNEPP</a> | 541.2439 | 569.2388                 | <a href="#">MNEPPG</a> | 598.2654 | <a href="#">626.2603</a> | <a href="#">MNEPPGA</a> | 669.3025 | 697.2974                 |
| <a href="#">NE</a>    | 216.0979 | <a href="#">244.0928</a> | <a href="#">NEP</a>    | 313.1506 | <a href="#">341.1456</a> | <a href="#">NEPP</a>    | 410.2034 | 438.1983                 |
| <a href="#">NEPPG</a> | 467.2249 | 495.2198                 | <a href="#">NEPPGA</a> | 538.2620 | 566.2569                 | <a href="#">EP</a>      | 199.1077 | 227.1026                 |
| <a href="#">EPP</a>   | 296.1605 | 324.1554                 | <a href="#">EPPG</a>   | 353.1819 | 381.1769                 | <a href="#">EPPGA</a>   | 424.2191 | 452.2140                 |
| <a href="#">PP</a>    | 167.1179 | 195.1128                 | <a href="#">PPG</a>    | 224.1394 | 252.1343                 | <a href="#">PPGA</a>    | 295.1765 | 323.1714                 |
| <a href="#">PG</a>    | 127.0866 | 155.0815                 | <a href="#">PGA</a>    | 198.1237 | 226.1186                 | <a href="#">GA</a>      | 101.0709 | <a href="#">129.0659</a> |

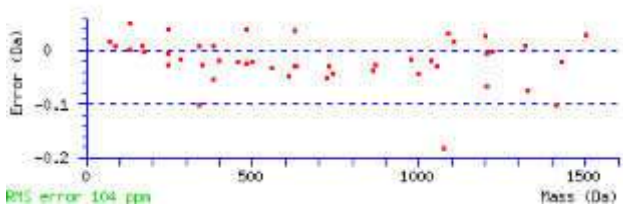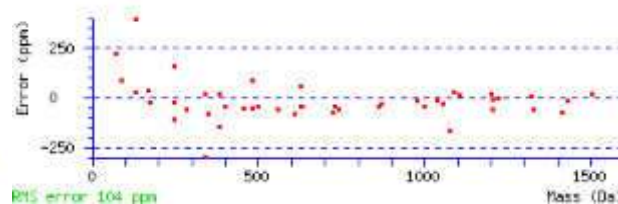

NCBI BLAST search of [VALVYGMNEPPGAR](#)

(Parameters: blastp, nr protein database, expect=20000, no filter, PAM30)

Other BLAST [web gateways](#)

#### All matches to this query

| Score | Mr(calc)  | Delta  | Sequence                        |
|-------|-----------|--------|---------------------------------|
| 99.6  | 1600.8031 | 0.0866 | <a href="#">VAIVYGMNEPPGAR</a>  |
| 99.6  | 1600.8031 | 0.0866 | <a href="#">VAIVYGMNEPPGAR</a>  |
| 99.6  | 1600.8395 | 0.0502 | <a href="#">VALVYGKMNEPPGAR</a> |
| 99.6  | 1600.8031 | 0.0866 | <a href="#">VALVYGMNEPPGAR</a>  |
| 99.6  | 1600.8031 | 0.0866 | <a href="#">VALVYGMNEPPGAR</a>  |
| 99.6  | 1600.8031 | 0.0866 | <a href="#">VALVYGMNEPPGAR</a>  |
| 99.6  | 1600.8031 | 0.0866 | <a href="#">VALVYGMNEPPGAR</a>  |
| 99.6  | 1600.8031 | 0.0866 | <a href="#">VALVYGMNEPPGAR</a>  |
| 99.6  | 1600.8031 | 0.0866 | <a href="#">VALVYGMNEPPGAR</a>  |
| 99.6  | 1600.8031 | 0.0866 | <a href="#">VALVYGMNEPPGAR</a>  |
| 99.6  | 1600.8031 | 0.0866 | <a href="#">VALVYGMNEPPGAR</a>  |

Mascot: <http://www.matrixscience.com/>



**MATRIX SCIENCE Mascot Search Results**

**Peptide View Spot no 87**

MS/MS Fragmentation of **QINVTCEVQQLGNNR**

Found in **gi|11466794** in **NCBIInr**, ATP synthase CF1 beta subunit [Oryza sativa Japonica Group]

Match to Query 23: 1885.043724 from(1886.051000,1+) intensity(0.0000) index(12)

Title: Label: D11, Spot\_Id: 216640, Peak\_List\_Id: 221231, MSMS Job\_Run\_Id: 21346, Comment:

Data file C:\Documents and Settings\Administrator\Desktop\farah BHU\RAJESH\12-1-13 raj\ppw\_D11\_135997699500.txt

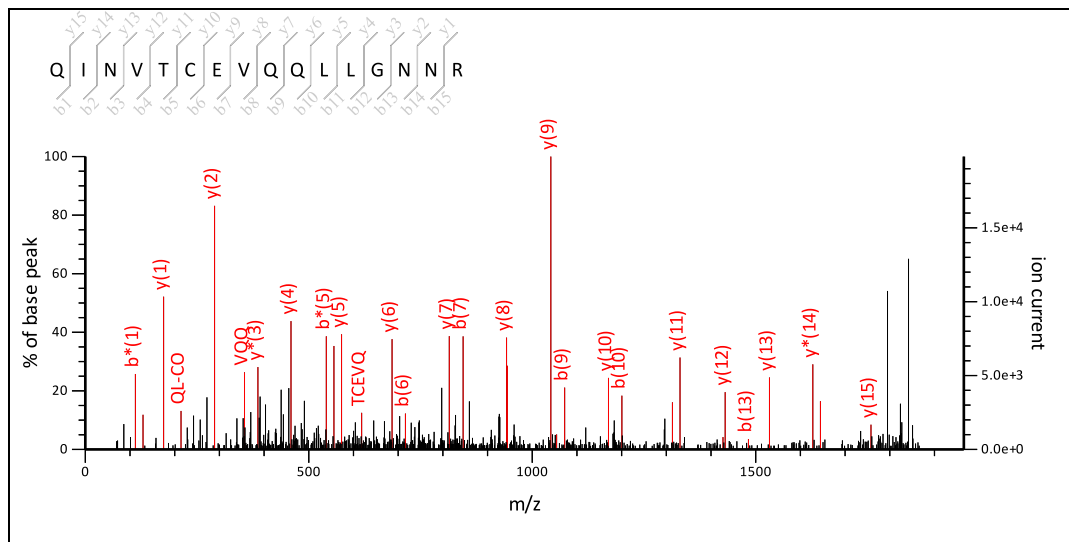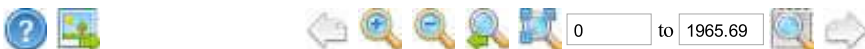

Label all possible matches  Label matches used for scoring

Monoisotopic mass of neutral peptide Mr(calc): 1884.9476

Fixed modifications: Carbamidomethyl (C) (apply to specified residues or termini only)

Ions Score: 143 Expect: 1.9e-11

Matches : 38/282 fragment ions using 36 most intense peaks [\(help\)](#)

| #  | Immon.   | a         | a*        | a <sup>0</sup> | b         | b*        | b <sup>0</sup> | d         | d'       | Seq. | v         | w         | w'        | y         | y*        |
|----|----------|-----------|-----------|----------------|-----------|-----------|----------------|-----------|----------|------|-----------|-----------|-----------|-----------|-----------|
| 1  | 101.0709 | 101.0709  | 84.0444   |                | 129.0659  | 112.0393  |                | 44.0495   |          | Q    |           |           |           |           |           |
| 2  | 86.0964  | 214.1550  | 197.1285  |                | 242.1499  | 225.1234  |                | 186.1237  | 200.1394 | I    | 1699.8180 | 1712.8384 | 1726.8541 | 1757.8963 | 1740.8697 |
| 3  | 87.0553  | 328.1979  | 311.1714  |                | 356.1928  | 339.1663  |                | 285.1921  |          | N    | 1585.7751 | 1584.7799 |           | 1644.8122 | 1627.7857 |
| 4  | 72.0808  | 427.2663  | 410.2398  |                | 455.2613  | 438.2347  |                | 413.2507  |          | V    | 1486.7067 | 1499.7271 |           | 1530.7693 | 1513.7428 |
| 5  | 74.0600  | 528.3140  | 511.2875  | 510.3035       | 556.3089  | 539.2824  | 538.2984       | 512.3191  | 514.2984 | T    | 1385.6590 | 1398.6794 | 1400.6587 | 1431.7009 | 1414.6743 |
| 6  | 133.0430 | 688.3447  | 671.3181  | 670.3341       | 716.3396  | 699.3130  | 698.3290       | 599.3511  |          | C    | 1225.6284 | 1224.6331 |           | 1330.6532 | 1313.6267 |
| 7  | 102.0550 | 817.3873  | 800.3607  | 799.3767       | 845.3822  | 828.3556  | 827.3716       | 759.3818  |          | E    | 1096.5858 | 1095.5905 |           | 1170.6226 | 1153.5960 |
| 8  | 72.0808  | 916.4557  | 899.4291  | 898.4451       | 944.4506  | 927.4240  | 926.4400       | 902.4400  |          | V    | 997.5174  | 1010.5378 |           | 1041.5800 | 1024.5534 |
| 9  | 101.0709 | 1044.5143 | 1027.4877 | 1026.5037      | 1072.5092 | 1055.4826 | 1054.4986      | 987.4928  |          | Q    | 869.4588  | 868.4635  |           | 942.5116  | 925.4850  |
| 10 | 101.0709 | 1172.5728 | 1155.5463 | 1154.5623      | 1200.5678 | 1183.5412 | 1182.5572      | 1115.5514 |          | Q    | 741.4002  | 740.4050  |           | 814.4530  | 797.4264  |
| 11 | 86.0964  | 1285.6569 | 1268.6304 | 1267.6463      | 1313.6518 | 1296.6253 | 1295.6412      | 1243.6099 |          | L    | 628.3161  | 627.3209  |           | 686.3944  | 669.3678  |
| 12 | 86.0964  | 1398.7410 | 1381.7144 | 1380.7304      | 1426.7359 | 1409.7093 | 1408.7253      | 1356.6940 |          | L    | 515.2321  | 514.2368  |           | 573.3103  | 556.2838  |
| 13 | 30.0338  | 1455.7624 | 1438.7359 | 1437.7519      | 1483.7573 | 1466.7308 | 1465.7468      |           |          | G    |           |           |           | 460.2263  | 443.1997  |
| 14 | 87.0553  | 1569.8054 | 1552.7788 | 1551.7948      | 1597.8003 | 1580.7737 | 1579.7897      | 1526.7995 |          | N    | 344.1677  | 343.1724  |           | 403.2048  | 386.1783  |
| 15 | 87.0553  | 1683.8483 | 1666.8217 | 1665.8377      | 1711.8432 | 1694.8166 | 1693.8326      | 1640.8425 |          | N    | 230.1248  | 229.1295  |           | 289.1619  | 272.1353  |
| 16 | 129.1135 |           |           |                |           |           |                |           |          | R    | 74.0237   | 73.0284   |           | 175.1190  | 158.0924  |

| Seq    | ya       | yb       | Seq    | ya       | yb       | Seq   | ya       | yb       |
|--------|----------|----------|--------|----------|----------|-------|----------|----------|
| IN     | 200.1394 | 228.1343 | INV    | 299.2078 | 327.2027 | INVT  | 400.2554 | 428.2504 |
| INVTC  | 560.2861 | 588.2810 | INVTCE | 689.3287 | 717.3236 | NV    | 186.1237 | 214.1186 |
| NVT    | 287.1714 | 315.1663 | NVTC   | 447.2020 | 475.1969 | NVTCE | 576.2446 | 604.2395 |
| NVTCEV | 675.3130 | 703.3080 | VT     | 173.1285 | 201.1234 | VTC   | 333.1591 | 361.1540 |
| VTC    | 462.2017 | 490.1966 | VTC    | 561.2701 | 589.2650 | VTC   | 689.3287 | 717.3236 |



|        |          |          |        |          |          |        |          |          |
|--------|----------|----------|--------|----------|----------|--------|----------|----------|
| TC     | 234.0907 | 262.0856 | TCE    | 363.1333 | 391.1282 | TCEV   | 462.2017 | 490.1966 |
| TCEVQ  | 590.2603 | 618.2552 | CE     | 262.0856 | 290.0805 | CEV    | 361.1540 | 389.1489 |
| CEVQ   | 489.2126 | 517.2075 | CEVQQ  | 617.2712 | 645.2661 | EV     | 201.1234 | 229.1183 |
| EVQ    | 329.1819 | 357.1769 | EVQQ   | 457.2405 | 485.2354 | EVQQL  | 570.3246 | 598.3195 |
| EVQQLL | 683.4087 | 711.4036 | VQ     | 200.1394 | 228.1343 | VQQ    | 328.1979 | 356.1928 |
| VQQL   | 441.2820 | 469.2769 | VQQLL  | 554.3661 | 582.3610 | VQQLLG | 611.3875 | 639.3824 |
| QQ     | 229.1295 | 257.1244 | QQL    | 342.2136 | 370.2085 | QQLL   | 455.2976 | 483.2926 |
| QQLLG  | 512.3191 | 540.3140 | QQLLGN | 626.3620 | 654.3570 | QL     | 214.1550 | 242.1499 |
| QLL    | 327.2391 | 355.2340 | QLLG   | 384.2605 | 412.2554 | QLLGN  | 498.3035 | 526.2984 |
| QLLGNN | 612.3464 | 640.3413 | LL     | 199.1805 | 227.1754 | LLG    | 256.2020 | 284.1969 |
| LLGN   | 370.2449 | 398.2398 | LLGNN  | 484.2878 | 512.2827 | LG     | 143.1179 | 171.1128 |
| LGN    | 257.1608 | 285.1557 | LGNN   | 371.2037 | 399.1987 | GN     | 144.0768 | 172.0717 |
| GNN    | 258.1197 | 286.1146 | NN     | 201.0982 | 229.0931 |        |          |          |

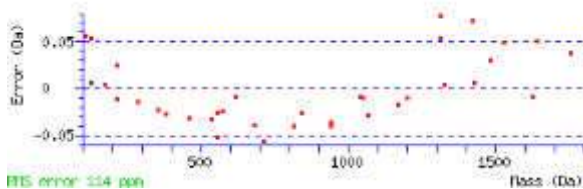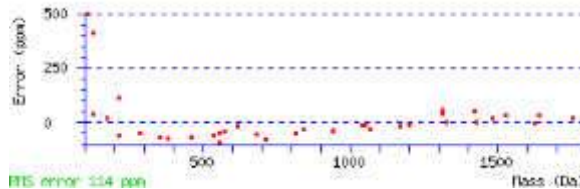

NCBI BLAST search of [QINVTCEVOQLLGNRR](#)

(Parameters: blastp, nr protein database, expect=20000, no filter, PAM30)

Other BLAST [web gateways](#)

#### All matches to this query

| Score | Mr(calc)  | Delta   | Sequence                            |
|-------|-----------|---------|-------------------------------------|
| 143.3 | 1884.9840 | 0.0598  | <a href="#">KINVTCEVOQLLGNRR</a>    |
| 143.3 | 1884.9476 | 0.0961  | <a href="#">QINVTCEVOQLLGNRR</a>    |
| 122.8 | 1885.9316 | -0.8879 | <a href="#">EINVTCEVOQLLGNRR</a>    |
| 30.0  | 1884.8927 | 0.1510  | <a href="#">AGLNSILOFDCEVYEK</a>    |
| 24.2  | 1885.9105 | -0.8667 | <a href="#">EGPTFSNIVQEMHKNR</a>    |
| 24.1  | 1886.0448 | -1.0010 | <a href="#">RISGMTLAIVEAPYIPR</a>   |
| 19.0  | 1885.9996 | -0.9559 | <a href="#">AISEEVESVKOLDAOLK</a>   |
| 17.8  | 1885.0673 | -0.0236 | <a href="#">IVGPISFRVDSGIAVDLK</a>  |
| 17.3  | 1883.9701 | 1.0736  | <a href="#">KOLEQGLEGGTAVGD LNR</a> |
| 16.1  | 1884.9905 | 0.0533  | <a href="#">IQANGLTSGGAEELLKER</a>  |

Mascot: <http://www.matrixscience.com/>

**MATRIX SCIENCE Mascot Search Results**

**Peptide View Spot no 87**

MS/MS Fragmentation of **GIYPAVDPLDSTSTMLQPR**

Found in **gi|11466794** in **NCBIInr**, ATP synthase CF1 beta subunit [Oryza sativa Japonica Group]

Match to Query 27: 2060.121624 from(2061.128900,1+) intensity(0.0000) index(14)

Title: Label: D11, Spot\_Id: 216640, Peak\_List\_Id: 221232, MSMS Job\_Run\_Id: 21346, Comment:

Data file C:\Documents and Settings\Administrator\Desktop\farah BHU\RAJESH\12-1-13 rajppw\_D11\_135997699500.txt

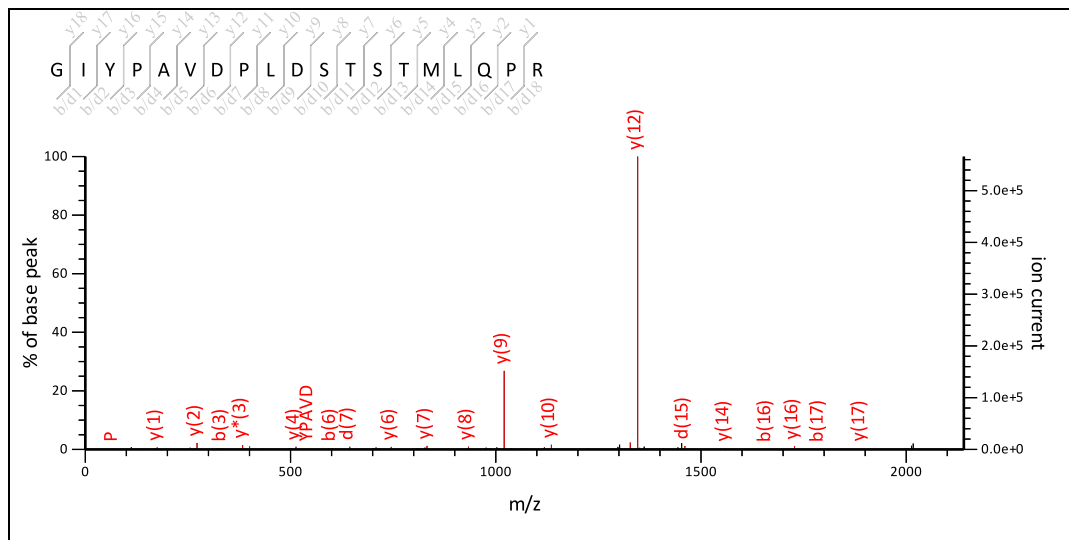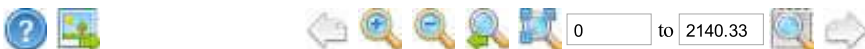

Label all possible matches  Label matches used for scoring

Monoisotopic mass of neutral peptide Mr(calc): 2060.0248

Fixed modifications: Carbamidomethyl (C) (apply to specified residues or termini only)

Ions Score: 152 Expect: 2.5e-12

Matches : 40/333 fragment ions using 40 most intense peaks [\(help\)](#)

| #  | Immon.         | a         | a*        | a <sup>0</sup> | b                | b*        | b <sup>0</sup>   | d                | d'        | Seq. | v         | w         | w'        | y                | y*               |
|----|----------------|-----------|-----------|----------------|------------------|-----------|------------------|------------------|-----------|------|-----------|-----------|-----------|------------------|------------------|
| 1  | 30.0338        | 30.0338   |           |                | 58.0287          |           |                  | 44.0495          |           | G    |           |           |           |                  |                  |
| 2  | 86.0964        | 143.1179  |           |                | 171.1128         |           |                  | 115.0866         | 129.1022  | I    | 1945.9324 | 1958.9528 | 1972.9685 | 2004.0107        | 1986.9841        |
| 3  | 136.0757       | 306.1812  |           |                | <b>334.1761</b>  |           |                  |                  |           | Y    | 1782.8691 |           |           | <b>1890.9266</b> | 1873.9000        |
| 4  | <b>70.0651</b> | 403.2340  |           |                | 431.2289         |           |                  | 377.2183         |           | P    | 1685.8163 | 1684.8211 |           | <b>1727.8633</b> | <b>1710.8367</b> |
| 5  | 44.0495        | 474.2711  |           |                | 502.2660         |           |                  |                  |           | A    | 1614.7792 |           |           | <b>1630.8105</b> | 1613.7840        |
| 6  | 72.0808        | 573.3395  |           |                | <b>601.3344</b>  |           |                  | 559.3239         |           | V    | 1515.7108 | 1528.7312 |           | <b>1559.7734</b> | 1542.7468        |
| 7  | 88.0393        | 688.3665  |           | 670.3559       | 716.3614         |           | 698.3508         | <b>644.3766</b>  |           | D    | 1400.6838 | 1399.6886 |           | <b>1460.7050</b> | 1443.6784        |
| 8  | <b>70.0651</b> | 785.4192  |           | 767.4087       | 813.4141         |           | 795.4036         | 759.4036         |           | P    | 1303.6311 | 1302.6358 |           | <b>1345.6780</b> | 1328.6515        |
| 9  | 86.0964        | 898.5033  |           | 880.4927       | <b>926.4982</b>  |           | 908.4876         | 856.4563         |           | L    | 1190.5470 | 1189.5518 |           | 1248.6253        | 1231.5987        |
| 10 | 88.0393        | 1013.5302 |           | 995.5197       | 1041.5251        |           | 1023.5146        | 969.5404         |           | D    | 1075.5201 | 1074.5248 |           | <b>1135.5412</b> | <b>1118.5147</b> |
| 11 | 60.0444        | 1100.5623 |           | 1082.5517      | 1128.5572        |           | 1110.5466        | 1084.5673        |           | S    | 988.4880  | 987.4928  |           | <b>1020.5143</b> | 1003.4877        |
| 12 | 74.0600        | 1201.6099 |           | 1183.5994      | 1229.6048        |           | 1211.5943        | 1185.6150        | 1187.5943 | T    | 887.4404  | 900.4608  | 902.4400  | <b>933.4822</b>  | 916.4557         |
| 13 | 60.0444        | 1288.6420 |           | 1270.6314      | 1316.6369        |           | 1298.6263        | 1272.6470        |           | S    | 800.4083  | 799.4131  |           | <b>832.4345</b>  | 815.4080         |
| 14 | 74.0600        | 1389.6896 |           | 1371.6791      | 1417.6846        |           | 1399.6740        | 1373.6947        | 1375.6740 | T    | 699.3607  | 712.3811  | 714.3603  | <b>745.4025</b>  | 728.3760         |
| 15 | 104.0528       | 1520.7301 |           | 1502.7196      | <b>1548.7250</b> |           | 1530.7145        | <b>1460.7268</b> |           | M    | 568.3202  | 567.3249  |           | <b>644.3548</b>  | 627.3283         |
| 16 | 86.0964        | 1633.8142 |           | 1615.8036      | <b>1661.8091</b> |           | 1643.7985        | 1591.7672        |           | L    | 455.2361  | 454.2409  |           | <b>513.3144</b>  | 496.2878         |
| 17 | 101.0709       | 1761.8728 | 1744.8462 | 1743.8622      | <b>1789.8677</b> | 1772.8411 | <b>1771.8571</b> | 1704.8513        |           | Q    | 327.1775  | 326.1823  |           | <b>400.2303</b>  | <b>383.2037</b>  |
| 18 | <b>70.0651</b> | 1858.9255 | 1841.8990 | 1840.9150      | 1886.9204        | 1869.8939 | 1868.9099        | 1832.9099        |           | P    | 230.1248  | 229.1295  |           | <b>272.1717</b>  | <b>255.1452</b>  |
| 19 | 129.1135       |           |           |                |                  |           |                  |                  |           | R    | 74.0237   | 73.0284   |           | <b>175.1190</b>  | 158.0924         |

| Seq   | ya       | yb       | Seq    | ya       | yb       | Seq  | ya       | yb       |
|-------|----------|----------|--------|----------|----------|------|----------|----------|
| IY    | 249.1598 | 277.1547 | IYP    | 346.2125 | 374.2074 | IYPA | 417.2496 | 445.2445 |
| IYPAV | 516.3180 | 544.3130 | IYPAVD | 631.3450 | 659.3399 | YP   | 233.1285 | 261.1234 |

|         |          |          |        |          |          |         |          |          |
|---------|----------|----------|--------|----------|----------|---------|----------|----------|
| YPA     | 304.1656 | 332.1605 | YPAV   | 403.2340 | 431.2289 | YPAVD   | 518.2609 | 546.2558 |
| YPAVDP  | 615.3137 | 643.3086 | PA     | 141.1022 | 169.0972 | PAV     | 240.1707 | 268.1656 |
| PAVD    | 355.1976 | 383.1925 | PAVDP  | 452.2504 | 480.2453 | PAVDPL  | 565.3344 | 593.3293 |
| PAVDPLD | 680.3614 | 708.3563 | AV     | 143.1179 | 171.1128 | AVD     | 258.1448 | 286.1397 |
| AVDP    | 355.1976 | 383.1925 | AVDPL  | 468.2817 | 496.2766 | AVDPLD  | 583.3086 | 611.3035 |
| AVDPLDS | 670.3406 | 698.3355 | VD     | 187.1077 | 215.1026 | VDP     | 284.1605 | 312.1554 |
| VDPL    | 397.2445 | 425.2395 | VDPLD  | 512.2715 | 540.2664 | VDPLDS  | 599.3035 | 627.2984 |
| DP      | 185.0921 | 213.0870 | DPL    | 298.1761 | 326.1710 | DPLD    | 413.2031 | 441.1980 |
| DPLDS   | 500.2351 | 528.2300 | DPLDST | 601.2828 | 629.2777 | DPLDSTS | 688.3148 | 716.3097 |
| PL      | 183.1492 | 211.1441 | PLD    | 298.1761 | 326.1710 | PLDS    | 385.2082 | 413.2031 |
| PLDST   | 486.2558 | 514.2508 | PLDSTS | 573.2879 | 601.2828 | PLDSTST | 674.3355 | 702.3305 |
| LD      | 201.1234 | 229.1183 | LDS    | 288.1554 | 316.1503 | LDST    | 389.2031 | 417.1980 |
| LDSTS   | 476.2351 | 504.2300 | LDSTST | 577.2828 | 605.2777 | DS      | 175.0713 | 203.0662 |
| DST     | 276.1190 | 304.1139 | DSTS   | 363.1510 | 391.1460 | DSTST   | 464.1987 | 492.1936 |
| DSTSTM  | 595.2392 | 623.2341 | ST     | 161.0921 | 189.0870 | STS     | 248.1241 | 276.1190 |
| STST    | 349.1718 | 377.1667 | STSTM  | 480.2123 | 508.2072 | STSTML  | 593.2963 | 621.2912 |
| TS      | 161.0921 | 189.0870 | TST    | 262.1397 | 290.1347 | TSTM    | 393.1802 | 421.1751 |
| TSTML   | 506.2643 | 534.2592 | TSTMLQ | 634.3229 | 662.3178 | ST      | 161.0921 | 189.0870 |
| STM     | 292.1326 | 320.1275 | STML   | 405.2166 | 433.2115 | STMLQ   | 533.2752 | 561.2701 |
| STMLQP  | 630.3280 | 658.3229 | TM     | 205.1005 | 233.0954 | TML     | 318.1846 | 346.1795 |
| TMLQ    | 446.2432 | 474.2381 | TMLQP  | 543.2959 | 571.2908 | ML      | 217.1369 | 245.1318 |
| MLQ     | 345.1955 | 373.1904 | MLQP   | 442.2483 | 470.2432 | LQ      | 214.1550 | 242.1499 |
| LQP     | 311.2078 | 339.2027 | QP     | 198.1237 | 226.1186 |         |          |          |

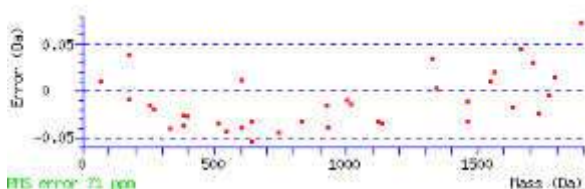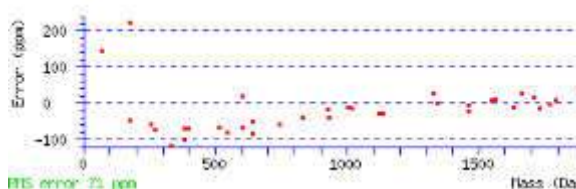

NCBI BLAST search of [GIYPAVDPLDSTSTMLOPR](#)  
 (Parameters: blastp, nr protein database, expect=20000, no filter, PAM30)  
 Other BLAST [web gateways](#)

All matches to this query

| Score | Mr(calc)  | Delta  | Sequence                            |
|-------|-----------|--------|-------------------------------------|
| 151.7 | 2060.0248 | 0.0968 | <a href="#">GIYPAVDPLDSTSTMLOPR</a> |
| 151.7 | 2060.0612 | 0.0604 | <a href="#">GIYPAVDPLDSTSTMLOPR</a> |
| 151.7 | 2060.0248 | 0.0968 | <a href="#">GIYPAVDPLDSTSTMLOPR</a> |
| 151.7 | 2060.0248 | 0.0968 | <a href="#">GIYPAVDPLDSTSTMLOPR</a> |
| 151.7 | 2060.0248 | 0.0968 | <a href="#">GIYPAVDPLDSTSTMLOPR</a> |
| 151.7 | 2060.0248 | 0.0968 | <a href="#">GIYPAVDPLDSTSTMLOPR</a> |
| 151.7 | 2060.0248 | 0.0968 | <a href="#">GIYPAVDPLDSTSTMLOPR</a> |
| 151.7 | 2060.0248 | 0.0968 | <a href="#">GIYPAVDPLDSTSTMLOPR</a> |
| 151.7 | 2060.0248 | 0.0968 | <a href="#">GIYPAVDPLDSTSTMLOPR</a> |
| 151.7 | 2060.0248 | 0.0968 | <a href="#">GIYPAVDPLDSTSTMLOPR</a> |
| 151.7 | 2060.0248 | 0.0968 | <a href="#">GIYPAVDPLDSTSTMLOPR</a> |

Mascot: <http://www.matrixscience.com/>

**MATRIX SCIENCE Mascot Search Results**

**Peptide View Spot no 87**

MS/MS Fragmentation of **GIYPAVDPLDSTSTMLQPR**

Found in **gi|11466794** in **NCBIInr**, ATP synthase CF1 beta subunit [Oryza sativa Japonica Group]

Match to Query 29: 2076.112824 from(2077.120100,1+) intensity(0.0000) index(15)

Title: Label: D11, Spot\_Id: 216640, Peak\_List\_Id: 221241, MSMS Job\_Run\_Id: 21346, Comment:

Data file C:\Documents and Settings\Administrator\Desktop\farah BHU\RAJESH\12-1-13 raj\ppw\_D11\_135997699500.txt

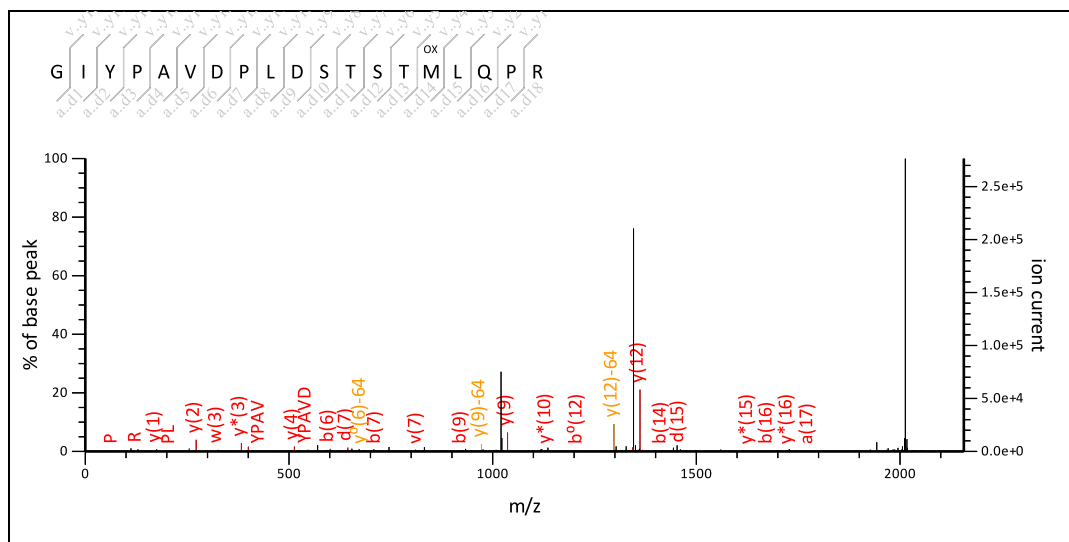

Navigation icons: Home, Back, Forward, Search, Print, etc. Range: 0 to 2156.66

Label all possible matches  Label matches used for scoring

Monoisotopic mass of neutral peptide Mr(calc): 2076.0198  
 Fixed modifications: Carbamidomethyl (C) (apply to specified residues or termini only)  
 Variable modifications:  
 M15 : Oxidation (M), with neutral losses 0.0000 (shown in table), 63.9983  
 Ions Score: 36 Expect: 0.88  
 Matches : 90/459 fragment ions using 199 most intense peaks ([help](#))

| #  | Immon.   | a         | a*        | a <sup>0</sup> | b         | b*        | b <sup>0</sup> | d         | d'        | Seq.     | v         | w         | w'        | y         | y*        |
|----|----------|-----------|-----------|----------------|-----------|-----------|----------------|-----------|-----------|----------|-----------|-----------|-----------|-----------|-----------|
| 1  | 30.0338  | 30.0338   |           |                | 58.0287   |           |                | 44.0495   |           | <b>G</b> |           |           |           |           |           |
| 2  | 86.0964  | 143.1179  |           |                | 171.1128  |           |                | 115.0866  | 129.1022  | <b>I</b> | 1961.9273 | 1974.9477 | 1988.9634 | 2020.0056 | 2002.9790 |
| 3  | 136.0757 | 306.1812  |           |                | 334.1761  |           |                |           |           | <b>Y</b> | 1798.8640 |           |           | 1906.9215 | 1889.8950 |
| 4  | 70.0651  | 403.2340  |           |                | 431.2289  |           |                | 377.2183  |           | <b>P</b> | 1701.8112 | 1700.8160 |           | 1743.8582 | 1726.8316 |
| 5  | 44.0495  | 474.2711  |           |                | 502.2660  |           |                |           |           | <b>A</b> | 1630.7741 |           |           | 1646.8054 | 1629.7789 |
| 6  | 72.0808  | 573.3395  |           |                | 601.3344  |           |                | 559.3239  |           | <b>V</b> | 1531.7057 | 1544.7261 |           | 1575.7683 | 1558.7418 |
| 7  | 88.0393  | 688.3665  |           | 670.3559       | 716.3614  |           | 698.3508       | 644.3766  |           | <b>D</b> | 1416.6788 | 1415.6835 |           | 1476.6999 | 1459.6733 |
| 8  | 70.0651  | 785.4192  |           | 767.4087       | 813.4141  |           | 795.4036       | 759.4036  |           | <b>P</b> | 1319.6260 | 1318.6307 |           | 1361.6729 | 1344.6464 |
| 9  | 86.0964  | 898.5033  |           | 880.4927       | 926.4982  |           | 908.4876       | 856.4563  |           | <b>L</b> | 1206.5419 | 1205.5467 |           | 1264.6202 | 1247.5936 |
| 10 | 88.0393  | 1013.5302 |           | 995.5197       | 1041.5251 |           | 1023.5146      | 969.5404  |           | <b>D</b> | 1091.5150 | 1090.5197 |           | 1151.5361 | 1134.5096 |
| 11 | 60.0444  | 1100.5623 |           | 1082.5517      | 1128.5572 |           | 1110.5466      | 1084.5673 |           | <b>S</b> | 1004.4830 | 1003.4877 |           | 1036.5092 | 1019.4826 |
| 12 | 74.0600  | 1201.6099 |           | 1183.5994      | 1229.6048 |           | 1211.5943      | 1185.6150 | 1187.5943 | <b>T</b> | 903.4353  | 916.4557  | 918.4349  | 949.4771  | 932.4506  |
| 13 | 60.0444  | 1288.6420 |           | 1270.6314      | 1316.6369 |           | 1298.6263      | 1272.6470 |           | <b>S</b> | 816.4033  | 815.4080  |           | 848.4295  | 831.4029  |
| 14 | 74.0600  | 1389.6896 |           | 1371.6791      | 1417.6846 |           | 1399.6740      | 1373.6947 | 1375.6740 | <b>T</b> | 715.3556  | 728.3760  | 730.3552  | 761.3974  | 744.3709  |
| 15 | 120.0478 | 1536.7250 |           | 1518.7145      | 1564.7200 |           | 1546.7094      | 1460.7268 |           | <b>M</b> | 568.3202  | 567.3249  |           | 660.3498  | 643.3232  |
| 16 | 86.0964  | 1649.8091 |           | 1631.7985      | 1677.8040 |           | 1659.7935      | 1607.7622 |           | <b>L</b> | 455.2361  | 454.2409  |           | 513.3144  | 496.2878  |
| 17 | 101.0709 | 1777.8677 | 1760.8411 | 1759.8571      | 1805.8626 | 1788.8360 | 1787.8520      | 1720.8462 |           | <b>Q</b> | 327.1775  | 326.1823  |           | 400.2303  | 383.2037  |
| 18 | 70.0651  | 1874.9204 | 1857.8939 | 1856.9099      | 1902.9154 | 1885.8888 | 1884.9048      | 1848.9048 |           | <b>P</b> | 230.1248  | 229.1295  |           | 272.1717  | 255.1452  |
| 19 | 129.1135 |           |           |                |           |           |                |           |           | <b>R</b> | 74.0237   | 73.0284   |           | 175.1190  | 158.0924  |

| Seq     | ya       | yb       | Seq    | ya       | yb       | Seq     | ya       | yb       |
|---------|----------|----------|--------|----------|----------|---------|----------|----------|
| IY      | 249.1598 | 277.1547 | IYP    | 346.2125 | 374.2074 | IYPA    | 417.2496 | 445.2445 |
| IYPAV   | 516.3180 | 544.3130 | IYPAVD | 631.3450 | 659.3399 | YP      | 233.1285 | 261.1234 |
| YPA     | 304.1656 | 332.1605 | YPAV   | 403.2340 | 431.2289 | YPAVD   | 518.2609 | 546.2558 |
| YPAVDP  | 615.3137 | 643.3086 | PA     | 141.1022 | 169.0972 | PAV     | 240.1707 | 268.1656 |
| PAVD    | 355.1976 | 383.1925 | PAVDP  | 452.2504 | 480.2453 | PAVDPL  | 565.3344 | 593.3293 |
| PAVDPLD | 680.3614 | 708.3563 | AV     | 143.1179 | 171.1128 | AVD     | 258.1448 | 286.1397 |
| AVDP    | 355.1976 | 383.1925 | AVDPL  | 468.2817 | 496.2766 | AVDPLD  | 583.3086 | 611.3035 |
| AVDPLDS | 670.3406 | 698.3355 | VD     | 187.1077 | 215.1026 | VDP     | 284.1605 | 312.1554 |
| VDPL    | 397.2445 | 425.2395 | VDPLD  | 512.2715 | 540.2664 | VDPLDS  | 599.3035 | 627.2984 |
| DP      | 185.0921 | 213.0870 | DPL    | 298.1761 | 326.1710 | DPLD    | 413.2031 | 441.1980 |
| DPLDS   | 500.2351 | 528.2300 | DPLDST | 601.2828 | 629.2777 | DPLDSTS | 688.3148 | 716.3097 |
| PL      | 183.1492 | 211.1441 | PLD    | 298.1761 | 326.1710 | PLDS    | 385.2082 | 413.2031 |
| PLDST   | 486.2558 | 514.2508 | PLDSTS | 573.2879 | 601.2828 | PLDSTST | 674.3355 | 702.3305 |
| LD      | 201.1234 | 229.1183 | LDS    | 288.1554 | 316.1503 | LDST    | 389.2031 | 417.1980 |
| LDSTS   | 476.2351 | 504.2300 | LDSTST | 577.2828 | 605.2777 | DS      | 175.0713 | 203.0662 |
| DST     | 276.1190 | 304.1139 | DSTS   | 363.1510 | 391.1460 | DSTST   | 464.1987 | 492.1936 |
| DSTSTM  | 611.2341 | 639.2290 | ST     | 161.0921 | 189.0870 | STS     | 248.1241 | 276.1190 |
| STST    | 349.1718 | 377.1667 | STSTM  | 496.2072 | 524.2021 | STSTML  | 609.2912 | 637.2862 |
| TS      | 161.0921 | 189.0870 | TST    | 262.1397 | 290.1347 | TSTM    | 409.1751 | 437.1701 |
| TSTML   | 522.2592 | 550.2541 | TSTMLQ | 650.3178 | 678.3127 | ST      | 161.0921 | 189.0870 |
| STM     | 308.1275 | 336.1224 | STML   | 421.2115 | 449.2064 | STMLQ   | 549.2701 | 577.2650 |
| STMLQP  | 646.3229 | 674.3178 | TM     | 221.0954 | 249.0904 | TML     | 334.1795 | 362.1744 |
| TMLQ    | 462.2381 | 490.2330 | TMLQP  | 559.2908 | 587.2858 | ML      | 233.1318 | 261.1267 |
| MLQ     | 361.1904 | 389.1853 | MLQP   | 458.2432 | 486.2381 | LQ      | 214.1550 | 242.1499 |
| LQP     | 311.2078 | 339.2027 | QP     | 198.1237 | 226.1186 |         |          |          |

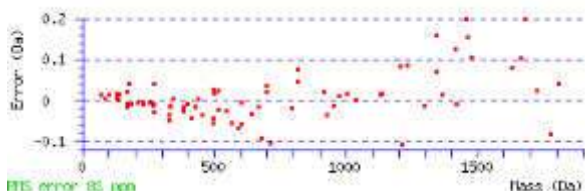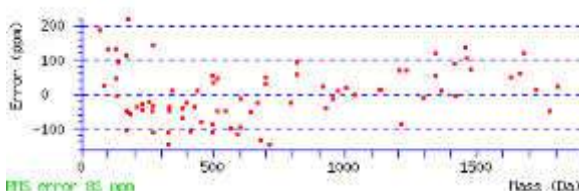

NCBI BLAST search of [GIYPAVDPLDSTSTMLQPR](#)

(Parameters: blastp, nr protein database, expect=20000, no filter, PAM30)

Other BLAST [web gateways](#)

#### All matches to this query

| Score | Mr(calcd) | Delta  | Sequence                            |
|-------|-----------|--------|-------------------------------------|
| 79.3  | 2075.9834 | 0.1295 | <a href="#">GEYPAVDPLDSTSTMLQPR</a> |
| 79.3  | 2075.0357 | 1.0771 | <a href="#">GKYPAVDPLDSTSTMLQPR</a> |
| 79.3  | 2074.9994 | 1.1135 | <a href="#">GOYPAVDPLDSTSTMLQPR</a> |
| 64.6  | 2076.0198 | 0.0931 | <a href="#">GIYPSVDPLDSTSTMLQPR</a> |
| 53.3  | 2074.9993 | 1.1135 | <a href="#">GIYPANDPLDSTSTMLQPR</a> |
| 53.3  | 2075.9834 | 0.1295 | <a href="#">GIYPADDPLDSTSTMLQPR</a> |
| 51.2  | 2076.0384 | 0.0744 | <a href="#">GIYPAVMPLDSTSTMLQPR</a> |
| 40.2  | 2076.0384 | 0.0744 | <a href="#">GIYPAVDPLMSTSTMLQPR</a> |
| 36.3  | 2076.0561 | 0.0567 | <a href="#">GIYPAVDPLDSTSTMLKPR</a> |
| 36.3  | 2076.0198 | 0.0931 | <a href="#">GIYPAVDPLDSTSTMLQPR</a> |

Mascot: <http://www.matrixscience.com/>

**MATRIX SCIENCE Mascot Search Results**

**Peptide View Spot no 87**

MS/MS Fragmentation of **GMEVIDTGAPLSVPVGGATLGR**

Found in **gi11466794** in **NCBI**nr, ATP synthase CF1 beta subunit [Oryza sativa Japonica Group]

Match to Query 31: 2096.196324 from(2097.203600,1+) intensity(0.0000) index(16)

Title: Label: D11, Spot\_Id: 216640, Peak\_List\_Id: 221226, MSMS Job\_Run\_Id: 21346, Comment:

Data file C:\Documents and Settings\Administrator\Desktop\farah BHU\RAJESH\12-1-13 raj\ppw\_D11\_135997699500.txt

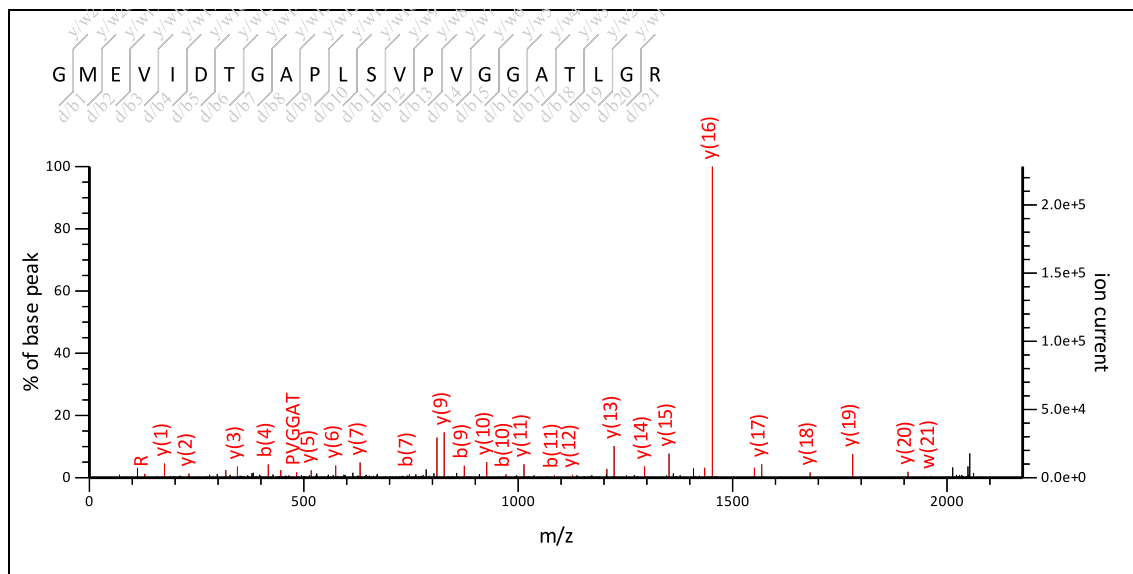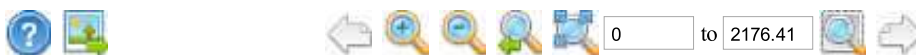

Label all possible matches  Label matches used for scoring

**Monoisotopic mass of neutral peptide Mr(calc):** 2096.0936

**Fixed modifications:** Carbamidomethyl (C) (apply to specified residues or termini only)

**Ions Score:** 185 **Expect:** 1.5e-15

**Matches :** 38/423 fragment ions using 42 most intense peaks ([help](#))

| #  | Immon.   | a         | a <sup>0</sup> | b         | b <sup>0</sup> | d         | d'        | Seq. | v         | w         | w'        | y         | y*        | y <sup>0</sup> | #  |
|----|----------|-----------|----------------|-----------|----------------|-----------|-----------|------|-----------|-----------|-----------|-----------|-----------|----------------|----|
| 1  | 30.0338  | 30.0338   |                | 58.0287   |                | 44.0495   |           | G    |           |           |           |           |           |                | 22 |
| 2  | 104.0528 | 161.0743  |                | 189.0692  |                | 101.0709  |           | M    | 1964.0447 | 1963.0495 |           | 2040.0794 | 2023.0529 | 2022.0688      | 21 |
| 3  | 102.0550 | 290.1169  | 272.1063       | 318.1118  | 300.1013       | 232.1114  |           | E    | 1835.0021 | 1834.0069 |           | 1909.0389 | 1892.0124 | 1891.0284      | 20 |
| 4  | 72.0808  | 389.1853  | 371.1748       | 417.1802  | 399.1697       | 375.1697  |           | V    | 1735.9337 | 1748.9541 |           | 1779.9963 | 1762.9698 | 1761.9858      | 19 |
| 5  | 86.0964  | 502.2694  | 484.2588       | 530.2643  | 512.2537       | 474.2381  | 488.2537  | I    | 1622.8497 | 1635.8701 | 1649.8857 | 1680.9279 | 1663.9014 | 1662.9173      | 18 |
| 6  | 88.0393  | 617.2963  | 599.2858       | 645.2912  | 627.2807       | 573.3065  |           | D    | 1507.8227 | 1506.8275 |           | 1567.8438 | 1550.8173 | 1549.8333      | 17 |
| 7  | 74.0600  | 718.3440  | 700.3334       | 746.3389  | 728.3284       | 702.3491  | 704.3284  | T    | 1406.7750 | 1419.7954 | 1421.7747 | 1452.8169 | 1435.7904 | 1434.8063      | 16 |
| 8  | 30.0338  | 775.3655  | 757.3549       | 803.3604  | 785.3498       |           |           | G    |           |           |           | 1351.7692 | 1334.7427 | 1333.7587      | 15 |
| 9  | 44.0495  | 846.4026  | 828.3920       | 874.3975  | 856.3869       |           |           | A    | 1278.7165 |           |           | 1294.7478 | 1277.7212 | 1276.7372      | 14 |
| 10 | 70.0651  | 943.4553  | 925.4448       | 971.4503  | 953.4397       | 917.4397  |           | P    | 1181.6637 | 1180.6685 |           | 1223.7106 | 1206.6841 | 1205.7001      | 13 |
| 11 | 86.0964  | 1056.5394 | 1038.5288      | 1084.5343 | 1066.5238      | 1014.4925 |           | L    | 1068.5796 | 1067.5844 |           | 1126.6579 | 1109.6313 | 1108.6473      | 12 |
| 12 | 60.0444  | 1143.5714 | 1125.5609      | 1171.5664 | 1153.5558      | 1127.5765 |           | S    | 981.5476  | 980.5524  |           | 1013.5738 | 996.5473  | 995.5633       | 11 |
| 13 | 72.0808  | 1242.6399 | 1224.6293      | 1270.6348 | 1252.6242      | 1228.6242 |           | V    | 882.4792  | 895.4996  |           | 926.5418  | 909.5152  | 908.5312       | 10 |
| 14 | 70.0651  | 1339.6926 | 1321.6821      | 1367.6875 | 1349.6770      | 1313.6770 |           | P    | 785.4264  | 784.4312  |           | 827.4734  | 810.4468  | 809.4628       | 9  |
| 15 | 72.0808  | 1438.7610 | 1420.7505      | 1466.7559 | 1448.7454      | 1424.7454 |           | V    | 686.3580  | 699.3784  |           | 730.4206  | 713.3941  | 712.4100       | 8  |
| 16 | 30.0338  | 1495.7825 | 1477.7719      | 1523.7774 | 1505.7668      |           |           | G    |           |           |           | 631.3522  | 614.3257  | 613.3416       | 7  |
| 17 | 30.0338  | 1552.8040 | 1534.7934      | 1580.7989 | 1562.7883      |           |           | G    |           |           |           | 574.3307  | 557.3042  | 556.3202       | 6  |
| 18 | 44.0495  | 1623.8411 | 1605.8305      | 1651.8360 | 1633.8254      |           |           | A    | 501.2780  |           |           | 517.3093  | 500.2827  | 499.2987       | 5  |
| 19 | 74.0600  | 1724.8888 | 1706.8782      | 1752.8837 | 1734.8731      | 1708.8938 | 1710.8731 | T    | 400.2303  | 413.2507  | 415.2300  | 446.2722  | 429.2456  | 428.2616       | 4  |



|    |          |           |           |           |           |           |  |   |          |          |  |          |          |  |   |
|----|----------|-----------|-----------|-----------|-----------|-----------|--|---|----------|----------|--|----------|----------|--|---|
| 20 | 86.0964  | 1837.9728 | 1819.9622 | 1865.9677 | 1847.9572 | 1795.9259 |  | L | 287.1462 | 286.1510 |  | 345.2245 | 328.1979 |  | 3 |
| 21 | 30.0338  | 1894.9943 | 1876.9837 | 1922.9892 | 1904.9786 |           |  | G |          |          |  | 232.1404 | 215.1139 |  | 2 |
| 22 | 129.1135 |           |           |           |           |           |  | R | 74.0237  | 73.0284  |  | 175.1190 | 158.0924 |  | 1 |

| Seq      | ya       | yb       | Seq      | ya       | yb       | Seq      | ya       | yb       |
|----------|----------|----------|----------|----------|----------|----------|----------|----------|
| ME       | 233.0954 | 261.0904 | MEV      | 332.1639 | 360.1588 | MEVI     | 445.2479 | 473.2428 |
| MEVID    | 560.2749 | 588.2698 | MEVIDT   | 661.3225 | 689.3175 | EV       | 201.1234 | 229.1183 |
| EVI      | 314.2074 | 342.2023 | EVID     | 429.2344 | 457.2293 | EVIDT    | 530.2821 | 558.2770 |
| EVIDTG   | 587.3035 | 615.2984 | EVIDTGA  | 658.3406 | 686.3355 | VI       | 185.1648 | 213.1598 |
| VID      | 300.1918 | 328.1867 | VIDT     | 401.2395 | 429.2344 | VIDTG    | 458.2609 | 486.2558 |
| VIDTGA   | 529.2980 | 557.2930 | VIDTGAP  | 626.3508 | 654.3457 | ID       | 201.1234 | 229.1183 |
| IDT      | 302.1710 | 330.1660 | IDTG     | 359.1925 | 387.1874 | IDTGA    | 430.2296 | 458.2245 |
| IDTGAP   | 527.2824 | 555.2773 | IDTGAPL  | 640.3665 | 668.3614 | DT       | 189.0870 | 217.0819 |
| DTG      | 246.1084 | 274.1034 | DTGA     | 317.1456 | 345.1405 | DTGAP    | 414.1983 | 442.1932 |
| DTGAPL   | 527.2824 | 555.2773 | DTGAPLS  | 614.3144 | 642.3093 | TG       | 131.0815 | 159.0764 |
| TGA      | 202.1186 | 230.1135 | TGAP     | 299.1714 | 327.1663 | TGAPL    | 412.2554 | 440.2504 |
| TGAPLS   | 499.2875 | 527.2824 | TGAPLSV  | 598.3559 | 626.3508 | TGAPLSVP | 695.4087 | 723.4036 |
| GA       | 101.0709 | 129.0659 | GAP      | 198.1237 | 226.1186 | GAPL     | 311.2078 | 339.2027 |
| GAPLS    | 398.2398 | 426.2347 | GAPLSV   | 497.3082 | 525.3031 | GAPLSVP  | 594.3610 | 622.3559 |
| GAPLSVPV | 693.4294 | 721.4243 | AP       | 141.1022 | 169.0972 | APL      | 254.1863 | 282.1812 |
| APLS     | 341.2183 | 369.2132 | APLSV    | 440.2867 | 468.2817 | APLSVP   | 537.3395 | 565.3344 |
| APLSVPV  | 636.4079 | 664.4028 | APLSVPVG | 693.4294 | 721.4243 | PL       | 183.1492 | 211.1441 |
| PLS      | 270.1812 | 298.1761 | PLSV     | 369.2496 | 397.2445 | PLSVP    | 466.3024 | 494.2973 |
| PLSVPV   | 565.3708 | 593.3657 | PLSVPVG  | 622.3923 | 650.3872 | PLSVPVGG | 679.4137 | 707.4087 |
| LS       | 173.1285 | 201.1234 | LSV      | 272.1969 | 300.1918 | LSVP     | 369.2496 | 397.2445 |
| LSVPV    | 468.3180 | 496.3130 | LSVPVG   | 525.3395 | 553.3344 | LSVPVGG  | 582.3610 | 610.3559 |
| LSVPVGG  | 653.3981 | 681.3930 | SV       | 159.1128 | 187.1077 | SVP      | 256.1656 | 284.1605 |
| SVPV     | 355.2340 | 383.2289 | SVPVG    | 412.2554 | 440.2504 | SVPVGG   | 469.2769 | 497.2718 |
| SVPVGG   | 540.3140 | 568.3089 | SVPVGGAT | 641.3617 | 669.3566 | VP       | 169.1335 | 197.1285 |
| VPV      | 268.2020 | 296.1969 | VPVG     | 325.2234 | 353.2183 | VPVGG    | 382.2449 | 410.2398 |
| VPVGG    | 453.2820 | 481.2769 | VPVGGAT  | 554.3297 | 582.3246 | VPVGGATL | 667.4137 | 695.4087 |
| PV       | 169.1335 | 197.1285 | PVG      | 226.1550 | 254.1499 | PVGG     | 283.1765 | 311.1714 |
| PVGG     | 354.2136 | 382.2085 | PVGGAT   | 455.2613 | 483.2562 | PVGGATL  | 568.3453 | 596.3402 |
| PVGGATL  | 625.3668 | 653.3617 | VG       | 129.1022 | 157.0972 | VGG      | 186.1237 | 214.1186 |
| VGGA     | 257.1608 | 285.1557 | VGGAT    | 358.2085 | 386.2034 | VGGATL   | 471.2926 | 499.2875 |
| VGGATL   | 528.3140 | 556.3089 | GG       | 87.0553  | 115.0502 | GGA      | 158.0924 | 186.0873 |
| GGAT     | 259.1401 | 287.1350 | GGATL    | 372.2241 | 400.2191 | GGATLG   | 429.2456 | 457.2405 |
| GA       | 101.0709 | 129.0659 | GAT      | 202.1186 | 230.1135 | GATL     | 315.2027 | 343.1976 |
| GATLG    | 372.2241 | 400.2191 | AT       | 145.0972 | 173.0921 | ATL      | 258.1812 | 286.1761 |
| ATLG     | 315.2027 | 343.1976 | TL       | 187.1441 | 215.1390 | TLG      | 244.1656 | 272.1605 |
| LG       | 143.1179 | 171.1128 |          |          |          |          |          |          |

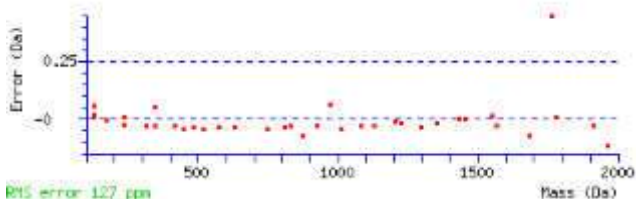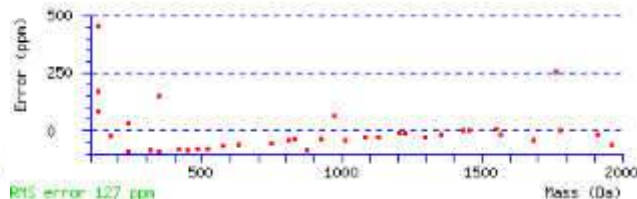

NCBI BLAST search of [GMEVIDTGAPLSVPVGGATLGR](#)  
 (Parameters: blastp, nr protein database, expect=20000, no filter, PAM30)  
 Other BLAST [web gateways](#)

All matches to this query



| Score | Mr(calc)  | Delta  | Sequence                               |
|-------|-----------|--------|----------------------------------------|
| 185.0 | 2096.0936 | 0.1027 | <a href="#">GMEVIDTGAPISVPVGGATLGR</a> |
| 185.0 | 2096.0936 | 0.1027 | <a href="#">GMEVIDTGAPISVPVGGATLGR</a> |
| 185.0 | 2096.0936 | 0.1027 | <a href="#">GMEVIDTGAPISVPVGGATLGR</a> |
| 185.0 | 2096.0936 | 0.1027 | <a href="#">GMEVIDTGAPISVPVGGATLGR</a> |
| 185.0 | 2096.0936 | 0.1027 | <a href="#">GMEVIDTGAPLSVPVGGATIGR</a> |
| 185.0 | 2096.0936 | 0.1027 | <a href="#">GMEVIDTGAPLSVPVGGATLGR</a> |
| 185.0 | 2096.0936 | 0.1027 | <a href="#">GMEVIDTGAPLSVPVGGATLGR</a> |
| 185.0 | 2096.0936 | 0.1027 | <a href="#">GMEVIDTGAPLSVPVGGATLGR</a> |
| 185.0 | 2096.0936 | 0.1027 | <a href="#">GMEVIDTGAPLSVPVGGATLGR</a> |
| 185.0 | 2096.0936 | 0.1027 | <a href="#">GMEVIDTGAPLSVPVGGATLGR</a> |

Mascot: <http://www.matrixscience.com/>

**MATRIX SCIENCE Mascot Search Results**

**Peptide View Spot no 87**

MS/MS Fragmentation of **GMEVIDTGAPLSVPVGGATLGR**

Found in **gi11466794** in **NCBI**nr, ATP synthase CF1 beta subunit [Oryza sativa Japonica Group]

Match to Query 33: 2112.183924 from(2113.191200,1+) intensity(0.0000) index(17)

Title: Label: D11, Spot\_Id: 216640, Peak\_List\_Id: 221239, MSMS Job\_Run\_Id: 21346, Comment:

Data file C:\Documents and Settings\Administrator\Desktop\farah BHU\RAJESH\12-1-13 raj\ppw\_D11\_135997699500.txt

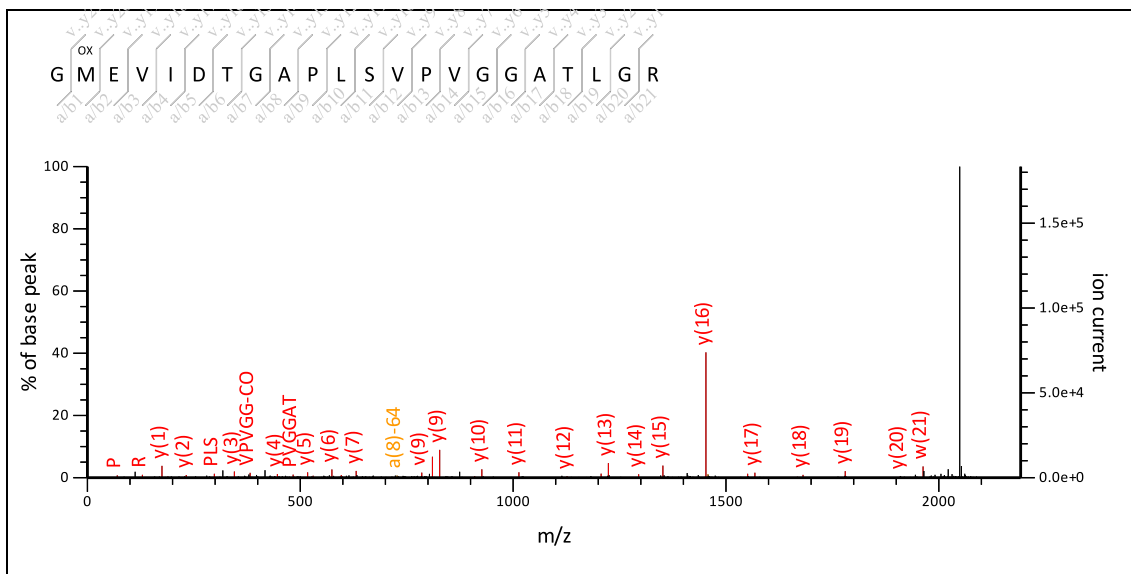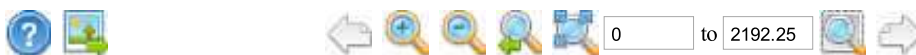

Label all possible matches  Label matches used for scoring

**Monoisotopic mass of neutral peptide Mr(calc):** 2112.0885

**Fixed modifications:** Carbamidomethyl (C) (apply to specified residues or termini only)

**Variable modifications:**

**M2** : Oxidation (M), with neutral losses 0.0000 (shown in table), 63.9983

**Ions Score:** 141 **Expect:** 2.7e-11

**Matches** : 43/529 fragment ions using 63 most intense peaks ([help](#))

| #  | Immon.   | a         | a <sup>0</sup> | b         | b <sup>0</sup> | d         | d'       | Seq. | v         | w         | w'        | y         | y*        | y <sup>0</sup> | #  |
|----|----------|-----------|----------------|-----------|----------------|-----------|----------|------|-----------|-----------|-----------|-----------|-----------|----------------|----|
| 1  | 30.0338  | 30.0338   |                | 58.0287   |                | 44.0495   |          | G    |           |           |           |           |           |                | 22 |
| 2  | 120.0478 | 177.0692  |                | 205.0641  |                | 101.0709  |          | M    | 1964.0447 | 1963.0495 |           | 2056.0743 | 2039.0478 | 2038.0638      | 21 |
| 3  | 102.0550 | 306.1118  | 288.1013       | 334.1067  | 316.0962       | 248.1063  |          | E    | 1835.0021 | 1834.0069 |           | 1909.0389 | 1892.0124 | 1891.0284      | 20 |
| 4  | 72.0808  | 405.1802  | 387.1697       | 433.1751  | 415.1646       | 391.1646  |          | V    | 1735.9337 | 1748.9541 |           | 1779.9963 | 1762.9698 | 1761.9858      | 19 |
| 5  | 86.0964  | 518.2643  | 500.2537       | 546.2592  | 528.2486       | 490.2330  | 504.2486 | I    | 1622.8497 | 1635.8701 | 1649.8857 | 1680.9279 | 1663.9014 | 1662.9173      | 18 |
| 6  | 88.0393  | 633.2912  | 615.2807       | 661.2862  | 643.2756       | 589.3014  |          | D    | 1507.8227 | 1506.8275 |           | 1567.8438 | 1550.8173 | 1549.8333      | 17 |
| 7  | 74.0600  | 734.3389  | 716.3284       | 762.3338  | 744.3233       | 718.3440  | 720.3233 | T    | 1406.7750 | 1419.7954 | 1421.7747 | 1452.8169 | 1435.7904 | 1434.8063      | 16 |
| 8  | 30.0338  | 791.3604  | 773.3498       | 819.3553  | 801.3447       |           |          | G    |           |           |           | 1351.7692 | 1334.7427 | 1333.7587      | 15 |
| 9  | 44.0495  | 862.3975  | 844.3869       | 890.3924  | 872.3818       |           |          | A    | 1278.7165 |           |           | 1294.7478 | 1277.7212 | 1276.7372      | 14 |
| 10 | 70.0651  | 959.4503  | 941.4397       | 987.4452  | 969.4346       | 933.4346  |          | P    | 1181.6637 | 1180.6684 |           | 1223.7106 | 1206.6841 | 1205.7001      | 13 |
| 11 | 86.0964  | 1072.5343 | 1054.5238      | 1100.5292 | 1082.5187      | 1030.4874 |          | L    | 1068.5796 | 1067.5844 |           | 1126.6579 | 1109.6313 | 1108.6473      | 12 |
| 12 | 60.0444  | 1159.5664 | 1141.5558      | 1187.5613 | 1169.5507      | 1143.5714 |          | S    | 981.5476  | 980.5524  |           | 1013.5738 | 996.5473  | 995.5633       | 11 |
| 13 | 72.0808  | 1258.6348 | 1240.6242      | 1286.6297 | 1268.6191      | 1244.6191 |          | V    | 882.4792  | 895.4996  |           | 926.5418  | 909.5152  | 908.5312       | 10 |
| 14 | 70.0651  | 1355.6875 | 1337.6770      | 1383.6824 | 1365.6719      | 1329.6719 |          | P    | 785.4264  | 784.4312  |           | 827.4734  | 810.4468  | 809.4628       | 9  |
| 15 | 72.0808  | 1454.7559 | 1436.7454      | 1482.7509 | 1464.7403      | 1440.7403 |          | V    | 686.3580  | 699.3784  |           | 730.4206  | 713.3941  | 712.4100       | 8  |
| 16 | 30.0338  | 1511.7774 | 1493.7668      | 1539.7723 | 1521.7618      |           |          | G    |           |           |           | 631.3522  | 614.3257  | 613.3416       | 7  |
| 17 | 30.0338  | 1568.7989 | 1550.7883      | 1596.7938 | 1578.7832      |           |          | G    |           |           |           | 574.3307  | 557.3042  | 556.3202       | 6  |

|    |          |           |           |           |           |           |           |   |          |          |          |          |          |          |   |
|----|----------|-----------|-----------|-----------|-----------|-----------|-----------|---|----------|----------|----------|----------|----------|----------|---|
| 18 | 44.0495  | 1639.8360 | 1621.8254 | 1667.8309 | 1649.8203 |           |           | A | 501.2780 |          |          | 517.3093 | 500.2827 | 499.2987 | 5 |
| 19 | 74.0600  | 1740.8837 | 1722.8731 | 1768.8786 | 1750.8680 | 1724.8888 | 1726.8680 | T | 400.2303 | 413.2507 | 415.2300 | 446.2722 | 429.2456 | 428.2616 | 4 |
| 20 | 86.0964  | 1853.9677 | 1835.9572 | 1881.9626 | 1863.9521 | 1811.9208 |           | L | 287.1462 | 286.1510 |          | 345.2245 | 328.1979 |          | 3 |
| 21 | 30.0338  | 1910.9892 | 1892.9786 | 1938.9841 | 1920.9735 |           |           | G |          |          |          | 232.1404 | 215.1139 |          | 2 |
| 22 | 129.1135 |           |           |           |           |           |           | R | 74.0237  | 73.0284  |          | 175.1190 | 158.0924 |          | 1 |

| Seq      | ya       | yb       | Seq      | ya       | yb       | Seq      | ya       | yb       |
|----------|----------|----------|----------|----------|----------|----------|----------|----------|
| ME       | 249.0904 | 277.0853 | MEV      | 348.1588 | 376.1537 | MEVI     | 461.2428 | 489.2377 |
| MEVID    | 576.2698 | 604.2647 | MEVIDT   | 677.3175 | 705.3124 | EV       | 201.1234 | 229.1183 |
| EVI      | 314.2074 | 342.2023 | EVID     | 429.2344 | 457.2293 | EVIDT    | 530.2821 | 558.2770 |
| EVIDTG   | 587.3035 | 615.2984 | EVIDTGA  | 658.3406 | 686.3355 | VI       | 185.1648 | 213.1598 |
| VID      | 300.1918 | 328.1867 | VIDT     | 401.2395 | 429.2344 | VIDTG    | 458.2609 | 486.2558 |
| VIDTGA   | 529.2980 | 557.2930 | VIDTGAP  | 626.3508 | 654.3457 | ID       | 201.1234 | 229.1183 |
| IDT      | 302.1710 | 330.1660 | IDTG     | 359.1925 | 387.1874 | IDTGA    | 430.2296 | 458.2245 |
| IDTGAP   | 527.2824 | 555.2773 | IDTGAPL  | 640.3665 | 668.3614 | DT       | 189.0870 | 217.0819 |
| DTG      | 246.1084 | 274.1034 | DTGA     | 317.1456 | 345.1405 | DTGAP    | 414.1983 | 442.1932 |
| DTGAPL   | 527.2824 | 555.2773 | DTGAPLS  | 614.3144 | 642.3093 | TG       | 131.0815 | 159.0764 |
| TGA      | 202.1186 | 230.1135 | TGAP     | 299.1714 | 327.1663 | TGAPL    | 412.2554 | 440.2504 |
| TGAPLS   | 499.2875 | 527.2824 | TGAPLSV  | 598.3559 | 626.3508 | TGAPLSVP | 695.4087 | 723.4036 |
| GA       | 101.0709 | 129.0659 | GAP      | 198.1237 | 226.1186 | GAPL     | 311.2078 | 339.2027 |
| GAPLS    | 398.2398 | 426.2347 | GAPLSV   | 497.3082 | 525.3031 | GAPLSVP  | 594.3610 | 622.3559 |
| GAPLSVPV | 693.4294 | 721.4243 | AP       | 141.1022 | 169.0972 | APL      | 254.1863 | 282.1812 |
| APLS     | 341.2183 | 369.2132 | APLSV    | 440.2867 | 468.2817 | APLSVP   | 537.3395 | 565.3344 |
| APLSVPV  | 636.4079 | 664.4028 | APLSVPVG | 693.4294 | 721.4243 | PL       | 183.1492 | 211.1441 |
| PLS      | 270.1812 | 298.1761 | PLSV     | 369.2496 | 397.2445 | PLSVP    | 466.3024 | 494.2973 |
| PLSVPV   | 565.3708 | 593.3657 | PLSVPVG  | 622.3923 | 650.3872 | PLSVPVGG | 679.4137 | 707.4087 |
| LS       | 173.1285 | 201.1234 | LSV      | 272.1969 | 300.1918 | LSVP     | 369.2496 | 397.2445 |
| LSVPV    | 468.3180 | 496.3130 | LSVPVG   | 525.3395 | 553.3344 | LSVPVGG  | 582.3610 | 610.3559 |
| LSVPVGGA | 653.3981 | 681.3930 | SV       | 159.1128 | 187.1077 | SVP      | 256.1656 | 284.1605 |
| SVPV     | 355.2340 | 383.2289 | SVPVG    | 412.2554 | 440.2504 | SVPVGG   | 469.2769 | 497.2718 |
| SVPVGGA  | 540.3140 | 568.3089 | SVPVGGAT | 641.3617 | 669.3566 | VP       | 169.1335 | 197.1285 |
| VPV      | 268.2020 | 296.1969 | VPVG     | 325.2234 | 353.2183 | VPVGG    | 382.2449 | 410.2398 |
| VPVGGA   | 453.2820 | 481.2769 | VPVGGAT  | 554.3297 | 582.3246 | VPVGGATL | 667.4137 | 695.4087 |
| PV       | 169.1335 | 197.1285 | PVG      | 226.1550 | 254.1499 | PVGG     | 283.1765 | 311.1714 |
| PVGGA    | 354.2136 | 382.2085 | PVGGAT   | 455.2613 | 483.2562 | PVGGATL  | 568.3453 | 596.3402 |
| PVGGATLG | 625.3668 | 653.3617 | VG       | 129.1022 | 157.0972 | VGG      | 186.1237 | 214.1186 |
| VGGA     | 257.1608 | 285.1557 | VGGAT    | 358.2085 | 386.2034 | VGGATL   | 471.2926 | 499.2875 |
| VGGATLG  | 528.3140 | 556.3089 | GG       | 87.0553  | 115.0502 | GGA      | 158.0924 | 186.0873 |
| GGAT     | 259.1401 | 287.1350 | GGATL    | 372.2241 | 400.2191 | GGATLG   | 429.2456 | 457.2405 |
| GA       | 101.0709 | 129.0659 | GAT      | 202.1186 | 230.1135 | GATL     | 315.2027 | 343.1976 |
| GATLG    | 372.2241 | 400.2191 | AT       | 145.0972 | 173.0921 | ATL      | 258.1812 | 286.1761 |
| ATLG     | 315.2027 | 343.1976 | TL       | 187.1441 | 215.1390 | TLG      | 244.1656 | 272.1605 |
| LG       | 143.1179 | 171.1128 |          |          |          |          |          |          |

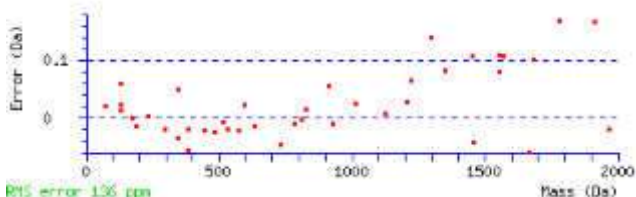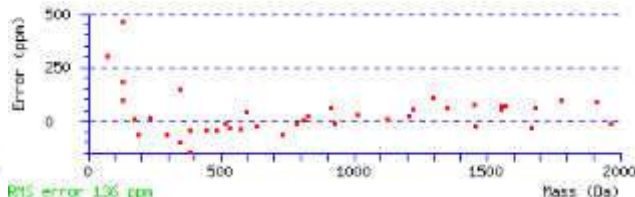

NCBI BLAST search of [GMEVIDTGAPLSVPVGGATLGR](#)  
 (Parameters: blastp, nr protein database, expect=20000, no filter, PAM30)  
 Other BLAST [web gateways](#)

## All matches to this query

| Score | Mr(calc)  | Delta  | Sequence                               |
|-------|-----------|--------|----------------------------------------|
| 141.1 | 2112.0885 | 0.0954 | <a href="#">GMEVIDTGAPISVPVGGATLGR</a> |
| 141.1 | 2112.0885 | 0.0954 | <a href="#">GMEVIDTGAPISVPVGGATLGR</a> |
| 141.1 | 2112.0885 | 0.0954 | <a href="#">GMEVIDTGAPISVPVGGATLGR</a> |
| 141.1 | 2112.0885 | 0.0954 | <a href="#">GMEVIDTGAPISVPVGGATLGR</a> |
| 141.1 | 2112.0885 | 0.0954 | <a href="#">GMEVIDTGAPLSVPVGGATLGR</a> |
| 141.1 | 2112.0885 | 0.0954 | <a href="#">GMEVIDTGAPLSVPVGGATLGR</a> |
| 141.1 | 2112.0885 | 0.0954 | <a href="#">GMEVIDTGAPLSVPVGGATLGR</a> |
| 141.1 | 2112.0885 | 0.0954 | <a href="#">GMEVIDTGAPLSVPVGGATLGR</a> |
| 141.1 | 2112.0885 | 0.0954 | <a href="#">GMEVIDTGAPLSVPVGGATLGR</a> |
| 141.1 | 2112.0885 | 0.0954 | <a href="#">GMEVIDTGAPLSVPVGGATLGR</a> |
| 141.1 | 2112.0885 | 0.0954 | <a href="#">GMEVIDTGAPLSVPVGGATLGR</a> |

Mascot: <http://www.matrixscience.com/>

**MATRIX SCIENCE Mascot Search Results**

**Peptide View Spot no 87**

MS/MS Fragmentation of **DTDGKQINVTCEVQQLLGNRR**

Found in **gi|11466794** in **NCBIInr**, ATP synthase CF1 beta subunit [Oryza sativa Japonica Group]

Match to Query 39: 2401.280124 from(2402.287400,1+) intensity(0.0000) index(19)

Title: Label: D11, Spot\_Id: 216640, Peak\_List\_Id: 221235, MSMS Job\_Run\_Id: 21346, Comment:

Data file C:\Documents and Settings\Administrator\Desktop\farah BHU\RAJESH\12-1-13 raj\ppw\_D11\_135997699500.txt

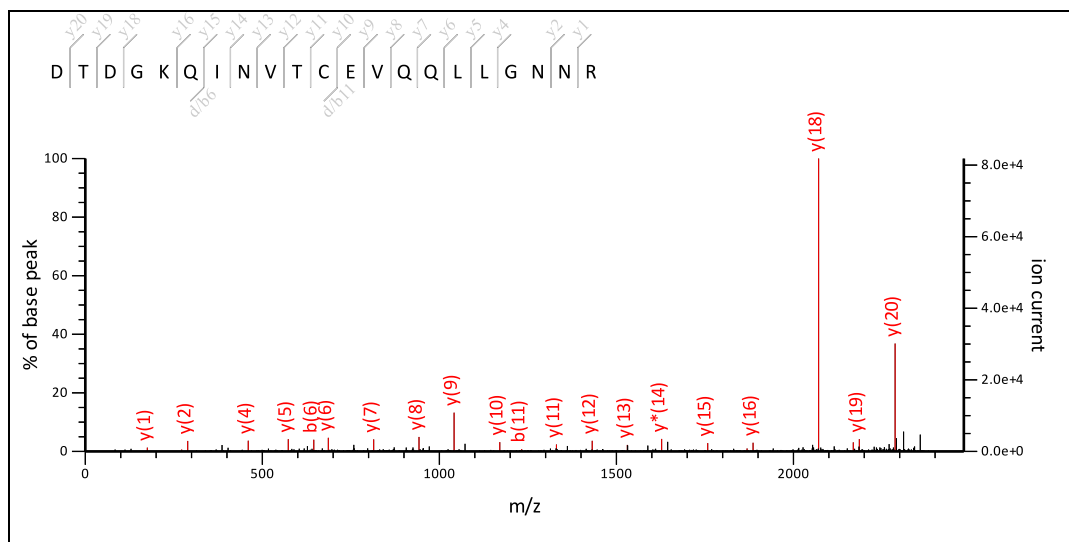

Navigation icons: Home, Back, Forward, Search, Print, Refresh. Search range: 0 to 2481.19

Label all possible matches  Label matches used for scoring

Monoisotopic mass of neutral peptide Mr(calc): 2401.1656

Fixed modifications: Carbamidomethyl (C) (apply to specified residues or termini only)

Ions Score: 196 Expect: 8.1e-17

Matches : 25/395 fragment ions using 23 most intense peaks [\(help\)](#)

| #  | Immon.   | a         | a*        | a <sup>0</sup> | b         | b*        | b <sup>0</sup> | d         | d'        | Seq. | v         | w         | w'        | y         | y*        |
|----|----------|-----------|-----------|----------------|-----------|-----------|----------------|-----------|-----------|------|-----------|-----------|-----------|-----------|-----------|
| 1  | 88.0393  | 88.0393   |           | 70.0287        | 116.0342  |           | 98.0237        | 44.0495   |           | D    |           |           |           |           |           |
| 2  | 74.0600  | 189.0870  |           | 171.0764       | 217.0819  |           | 199.0713       | 173.0921  | 175.0713  | T    | 2241.1041 | 2254.1245 | 2256.1037 | 2287.1459 | 2270.1194 |
| 3  | 88.0393  | 304.1139  |           | 286.1034       | 332.1088  |           | 314.0983       | 260.1241  |           | D    | 2126.0771 | 2125.0819 |           | 2186.0982 | 2169.0717 |
| 4  | 30.0338  | 361.1354  |           | 343.1248       | 389.1303  |           | 371.1197       |           |           | G    |           |           |           | 2071.0713 | 2054.0447 |
| 5  | 101.1073 | 489.2304  | 472.2038  | 471.2198       | 517.2253  | 500.1987  | 499.2147       | 432.1725  |           | K    | 1940.9607 | 1939.9654 |           | 2014.0498 | 1997.0233 |
| 6  | 101.0709 | 617.2889  | 600.2624  | 599.2784       | 645.2838  | 628.2573  | 627.2733       | 560.2675  |           | Q    | 1812.9021 | 1811.9069 |           | 1885.9549 | 1868.9283 |
| 7  | 86.0964  | 730.3730  | 713.3464  | 712.3624       | 758.3679  | 741.3414  | 740.3573       | 702.3417  | 716.3573  | I    | 1699.8180 | 1712.8384 | 1726.8541 | 1757.8963 | 1740.8697 |
| 8  | 87.0553  | 844.4159  | 827.3894  | 826.4054       | 872.4108  | 855.3843  | 854.4003       | 801.4101  |           | N    | 1585.7751 | 1584.7799 |           | 1644.8122 | 1627.7857 |
| 9  | 72.0808  | 943.4843  | 926.4578  | 925.4738       | 971.4793  | 954.4527  | 953.4687       | 929.4687  |           | V    | 1486.7067 | 1499.7271 |           | 1530.7693 | 1513.7428 |
| 10 | 74.0600  | 1044.5320 | 1027.5055 | 1026.5214      | 1072.5269 | 1055.5004 | 1054.5164      | 1028.5371 | 1030.5164 | T    | 1385.6590 | 1398.6794 | 1400.6587 | 1431.7009 | 1414.6743 |
| 11 | 133.0430 | 1204.5627 | 1187.5361 | 1186.5521      | 1232.5576 | 1215.5310 | 1214.5470      | 1115.5691 |           | C    | 1225.6284 | 1224.6331 |           | 1330.6532 | 1313.6267 |
| 12 | 102.0550 | 1333.6053 | 1316.5787 | 1315.5947      | 1361.6002 | 1344.5736 | 1343.5896      | 1275.5998 |           | E    | 1096.5858 | 1095.5905 |           | 1170.6226 | 1153.5960 |
| 13 | 72.0808  | 1432.6737 | 1415.6471 | 1414.6631      | 1460.6686 | 1443.6420 | 1442.6580      | 1418.6580 |           | V    | 997.5174  | 1010.5378 |           | 1041.5800 | 1024.5534 |
| 14 | 101.0709 | 1560.7322 | 1543.7057 | 1542.7217      | 1588.7272 | 1571.7006 | 1570.7166      | 1503.7108 |           | Q    | 869.4588  | 868.4635  |           | 942.5116  | 925.4850  |
| 15 | 101.0709 | 1688.7908 | 1671.7643 | 1670.7803      | 1716.7857 | 1699.7592 | 1698.7752      | 1631.7694 |           | Q    | 741.4002  | 740.4050  |           | 814.4530  | 797.4264  |
| 16 | 86.0964  | 1801.8749 | 1784.8483 | 1783.8643      | 1829.8698 | 1812.8433 | 1811.8592      | 1759.8279 |           | L    | 628.3161  | 627.3209  |           | 686.3944  | 669.3678  |
| 17 | 86.0964  | 1914.9590 | 1897.9324 | 1896.9484      | 1942.9539 | 1925.9273 | 1924.9433      | 1872.9120 |           | L    | 515.2321  | 514.2368  |           | 573.3103  | 556.2838  |
| 18 | 30.0338  | 1971.9804 | 1954.9539 | 1953.9699      | 1999.9753 | 1982.9488 | 1981.9648      |           |           | G    |           |           |           | 460.2263  | 443.1997  |
| 19 | 87.0553  | 2086.0233 | 2068.9968 | 2068.0128      | 2114.0183 | 2096.9917 | 2096.0077      | 2043.0175 |           | N    | 344.1677  | 343.1724  |           | 403.2048  | 386.1783  |
| 20 | 87.0553  | 2200.0663 | 2183.0397 | 2182.0557      | 2228.0612 | 2211.0346 | 2210.0506      | 2157.0605 |           | N    | 230.1248  | 229.1295  |           | 289.1619  | 272.1353  |
| 21 | 129.1135 |           |           |                |           |           |                |           |           | R    | 74.0237   | 73.0284   |           | 175.1190  | 158.0924  |

| Seq | ya | yb | Seq | ya | yb | Seq | ya | yb |
|-----|----|----|-----|----|----|-----|----|----|
|     |    |    |     |    |    |     |    |    |

|               |          |          |               |          |          |               |          |          |
|---------------|----------|----------|---------------|----------|----------|---------------|----------|----------|
| <b>TD</b>     | 189.0870 | 217.0819 | <b>TDG</b>    | 246.1084 | 274.1034 | <b>TDGK</b>   | 374.2034 | 402.1983 |
| <b>TDGKQ</b>  | 502.2620 | 530.2569 | <b>TDGKQI</b> | 615.3461 | 643.3410 | <b>DG</b>     | 145.0608 | 173.0557 |
| <b>DGK</b>    | 273.1557 | 301.1506 | <b>DGKQ</b>   | 401.2143 | 429.2092 | <b>DGKQI</b>  | 514.2984 | 542.2933 |
| <b>DGKQIN</b> | 628.3413 | 656.3362 | <b>GK</b>     | 158.1288 | 186.1237 | <b>GKQ</b>    | 286.1874 | 314.1823 |
| <b>GKQI</b>   | 399.2714 | 427.2663 | <b>GKQIN</b>  | 513.3144 | 541.3093 | <b>GKQINV</b> | 612.3828 | 640.3777 |
| <b>KQ</b>     | 229.1659 | 257.1608 | <b>KQI</b>    | 342.2500 | 370.2449 | <b>KQIN</b>   | 456.2929 | 484.2878 |
| <b>KQINV</b>  | 555.3613 | 583.3562 | <b>KQINVT</b> | 656.4090 | 684.4039 | <b>QI</b>     | 214.1550 | 242.1499 |
| <b>QIN</b>    | 328.1979 | 356.1928 | <b>QINV</b>   | 427.2663 | 455.2613 | <b>QINVT</b>  | 528.3140 | 556.3089 |
| <b>QINVTC</b> | 688.3447 | 716.3396 | <b>IN</b>     | 200.1394 | 228.1343 | <b>INV</b>    | 299.2078 | 327.2027 |
| <b>INVT</b>   | 400.2554 | 428.2504 | <b>INVTC</b>  | 560.2861 | 588.2810 | <b>INVTCE</b> | 689.3287 | 717.3236 |
| <b>NV</b>     | 186.1237 | 214.1186 | <b>NVT</b>    | 287.1714 | 315.1663 | <b>NVTC</b>   | 447.2020 | 475.1969 |
| <b>NVTCE</b>  | 576.2446 | 604.2395 | <b>NVTCEV</b> | 675.3130 | 703.3080 | <b>VT</b>     | 173.1285 | 201.1234 |
| <b>VTC</b>    | 333.1591 | 361.1540 | <b>VTCE</b>   | 462.2017 | 490.1966 | <b>VTCEV</b>  | 561.2701 | 589.2650 |
| <b>VTCEVQ</b> | 689.3287 | 717.3236 | <b>TC</b>     | 234.0907 | 262.0856 | <b>TCE</b>    | 363.1333 | 391.1282 |
| <b>TCEV</b>   | 462.2017 | 490.1966 | <b>TCEVQ</b>  | 590.2603 | 618.2552 | <b>CE</b>     | 262.0856 | 290.0805 |
| <b>CEV</b>    | 361.1540 | 389.1489 | <b>CEVQ</b>   | 489.2126 | 517.2075 | <b>CEVQQ</b>  | 617.2712 | 645.2661 |
| <b>EV</b>     | 201.1234 | 229.1183 | <b>EVQ</b>    | 329.1819 | 357.1769 | <b>EVQQ</b>   | 457.2405 | 485.2354 |
| <b>EVQQL</b>  | 570.3246 | 598.3195 | <b>EVQQLL</b> | 683.4087 | 711.4036 | <b>VQ</b>     | 200.1394 | 228.1343 |
| <b>VQQ</b>    | 328.1979 | 356.1928 | <b>VQQL</b>   | 441.2820 | 469.2769 | <b>VQQLL</b>  | 554.3661 | 582.3610 |
| <b>VQQLLG</b> | 611.3875 | 639.3824 | <b>QQ</b>     | 229.1295 | 257.1244 | <b>QQL</b>    | 342.2136 | 370.2085 |
| <b>QQLL</b>   | 455.2976 | 483.2926 | <b>QQLLG</b>  | 512.3191 | 540.3140 | <b>QQLLGN</b> | 626.3620 | 654.3570 |
| <b>QL</b>     | 214.1550 | 242.1499 | <b>QLL</b>    | 327.2391 | 355.2340 | <b>QLLG</b>   | 384.2605 | 412.2554 |
| <b>QLLGN</b>  | 498.3035 | 526.2984 | <b>QLLGNL</b> | 612.3464 | 640.3413 | <b>LL</b>     | 199.1805 | 227.1754 |
| <b>LLG</b>    | 256.2020 | 284.1969 | <b>LLGN</b>   | 370.2449 | 398.2398 | <b>LLGNN</b>  | 484.2878 | 512.2827 |
| <b>LG</b>     | 143.1179 | 171.1128 | <b>LGN</b>    | 257.1608 | 285.1557 | <b>LGNN</b>   | 371.2037 | 399.1987 |
| <b>GN</b>     | 144.0768 | 172.0717 | <b>GNN</b>    | 258.1197 | 286.1146 | <b>NN</b>     | 201.0982 | 229.0931 |

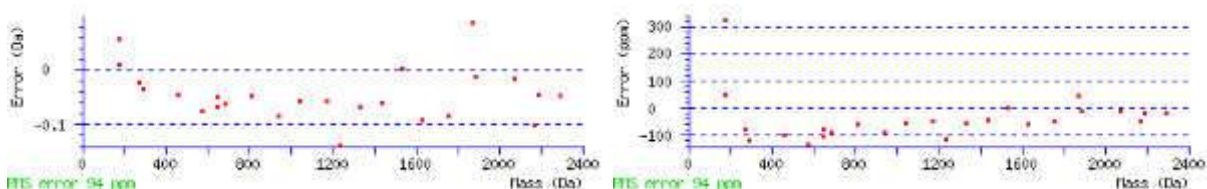

NCBI BLAST search of [DTDGKQINVTCEVQQLLGNRR](#)  
 (Parameters: blastp, nr protein database, expect=20000, no filter, PAM30)  
 Other BLAST [web gateways](#)

All matches to this query

| Score | Mr(calc)  | Delta   | Sequence                              |
|-------|-----------|---------|---------------------------------------|
| 195.6 | 2401.1656 | 0.1145  | <a href="#">DTDGKQINVTCEVQQLLGNRR</a> |
| 195.6 | 2401.1292 | 0.1509  | <a href="#">DTDGQOINVTCEVQQLLGNRR</a> |
| 195.6 | 2401.1292 | 0.1509  | <a href="#">DTDGQOINVTCEVQQLLGNRR</a> |
| 149.7 | 2401.1543 | 0.1258  | <a href="#">DTLGEEINVTCEVQQLLGNRR</a> |
| 149.7 | 2401.1292 | 0.1509  | <a href="#">DTNGOEINVTCEVQQLLGNRR</a> |
| 146.3 | 2401.1842 | 0.0959  | <a href="#">MTVGOQINVTCEVQQLLGNRR</a> |
| 141.4 | 2400.1452 | 1.1349  | <a href="#">DTNGQOINVTCEVQQLLGNRR</a> |
| 126.0 | 2401.1292 | 0.1509  | <a href="#">DNTGOEINVTCEVQQLLGNRR</a> |
| 124.4 | 2402.1132 | -0.8331 | <a href="#">DTDGEQINVTCEVQQLLGNRR</a> |
| 121.6 | 2401.1478 | 0.1323  | <a href="#">DIAGQCINVTCEVQQLLGNRR</a> |

Mascot: <http://www.matrixscience.com/>



**MATRIX SCIENCE Mascot Search Results**

**Peptide View Spot no 87**

MS/MS Fragmentation of **IFNVLGEPVDNLGPVDTSATFPPIHR**

Found in **gi|11466794** in **NCBIInr**, ATP synthase CF1 beta subunit [Oryza sativa Japonica Group]

Match to Query 41: 2707.533024 from(2708.540300,1+) intensity(0.0000) index(20)

Title: Label: D11, Spot\_Id: 216640, Peak\_List\_Id: 221225, MSMS Job\_Run\_Id: 21346, Comment:

Data file C:\Documents and Settings\Administrator\Desktop\farah BHU\RAJESH\12-1-13 raj\ppw\_D11\_135997699500.txt

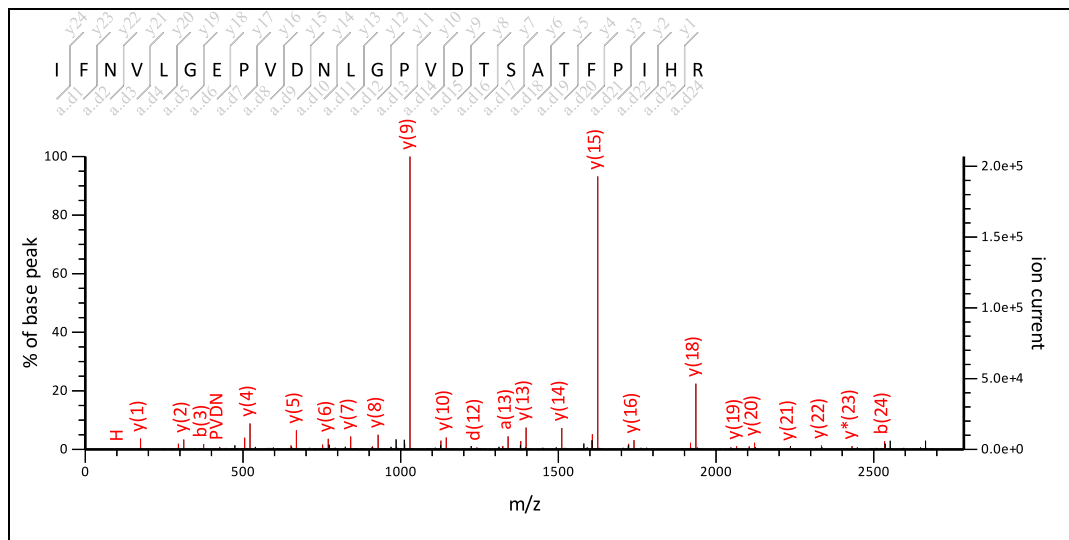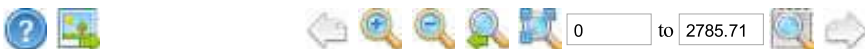

Label all possible matches  Label matches used for scoring

Monoisotopic mass of neutral peptide Mr(calc): 2707.3970

Fixed modifications: Carbamidomethyl (C) (apply to specified residues or termini only)

Ions Score: 177 Expect: 4.4e-15

Matches : 52/505 fragment ions using 54 most intense peaks [\(help\)](#)

| #  | Immon.   | a         | a*        | a <sup>0</sup> | b         | b*        | b <sup>0</sup> | d         | d'        | Seq. | v         | w         | w'       | y         | y*        |
|----|----------|-----------|-----------|----------------|-----------|-----------|----------------|-----------|-----------|------|-----------|-----------|----------|-----------|-----------|
| 1  | 86.0964  | 86.0964   |           |                | 114.0913  |           |                | 44.0495   |           | I    |           |           |          |           |           |
| 2  | 120.0808 | 233.1648  |           |                | 261.1598  |           |                |           |           | F    | 2503.2576 |           |          | 2595.3202 | 2578.2936 |
| 3  | 87.0553  | 347.2078  | 330.1812  |                | 375.2027  | 358.1761  |                | 304.2020  |           | N    | 2389.2147 | 2388.2194 |          | 2448.2518 | 2431.2252 |
| 4  | 72.0808  | 446.2762  | 429.2496  |                | 474.2711  | 457.2445  |                | 432.2605  |           | V    | 2290.1462 | 2303.1666 |          | 2334.2088 | 2317.1823 |
| 5  | 86.0964  | 559.3602  | 542.3337  |                | 587.3552  | 570.3286  |                | 517.3133  |           | L    | 2177.0622 | 2176.0669 |          | 2235.1404 | 2218.1139 |
| 6  | 30.0338  | 616.3817  | 599.3552  |                | 644.3766  | 627.3501  |                |           |           | G    |           |           |          | 2122.0564 | 2105.0298 |
| 7  | 102.0550 | 745.4243  | 728.3978  | 727.4137       | 773.4192  | 756.3927  | 755.4087       | 687.4188  |           | E    | 1990.9981 | 1990.0029 |          | 2065.0349 | 2048.0083 |
| 8  | 70.0651  | 842.4771  | 825.4505  | 824.4665       | 870.4720  | 853.4454  | 852.4614       | 816.4614  |           | P    | 1893.9454 | 1892.9501 |          | 1935.9923 | 1918.9658 |
| 9  | 72.0808  | 941.5455  | 924.5189  | 923.5349       | 969.5404  | 952.5138  | 951.5298       | 927.5298  |           | V    | 1794.8769 | 1807.8973 |          | 1838.9395 | 1821.9130 |
| 10 | 88.0393  | 1056.5724 | 1039.5459 | 1038.5619      | 1084.5673 | 1067.5408 | 1066.5568      | 1012.5826 |           | D    | 1679.8500 | 1678.8547 |          | 1739.8711 | 1722.8446 |
| 11 | 87.0553  | 1170.6153 | 1153.5888 | 1152.6048      | 1198.6103 | 1181.5837 | 1180.5997      | 1127.6095 |           | N    | 1565.8071 | 1564.8118 |          | 1624.8442 | 1607.8176 |
| 12 | 86.0964  | 1283.6994 | 1266.6729 | 1265.6888      | 1311.6943 | 1294.6678 | 1293.6838      | 1241.6525 |           | L    | 1452.7230 | 1451.7278 |          | 1510.8013 | 1493.7747 |
| 13 | 30.0338  | 1340.7209 | 1323.6943 | 1322.7103      | 1368.7158 | 1351.6892 | 1350.7052      |           |           | G    |           |           |          | 1397.7172 | 1380.6906 |
| 14 | 70.0651  | 1437.7736 | 1420.7471 | 1419.7631      | 1465.7686 | 1448.7420 | 1447.7580      | 1411.7580 |           | P    | 1298.6488 | 1297.6535 |          | 1340.6957 | 1323.6692 |
| 15 | 72.0808  | 1536.8421 | 1519.8155 | 1518.8315      | 1564.8370 | 1547.8104 | 1546.8264      | 1522.8264 |           | V    | 1199.5804 | 1212.6008 |          | 1243.6430 | 1226.6164 |
| 16 | 88.0393  | 1651.8690 | 1634.8424 | 1633.8584      | 1679.8639 | 1662.8374 | 1661.8533      | 1607.8792 |           | D    | 1084.5534 | 1083.5582 |          | 1144.5745 | 1127.5480 |
| 17 | 74.0600  | 1752.9167 | 1735.8901 | 1734.9061      | 1780.9116 | 1763.8850 | 1762.9010      | 1736.9218 | 1738.9010 | T    | 983.5057  | 996.5261  | 998.5054 | 1029.5476 | 1012.5211 |
| 18 | 60.0444  | 1839.9487 | 1822.9222 | 1821.9381      | 1867.9436 | 1850.9171 | 1849.9331      | 1823.9538 |           | S    | 896.4737  | 895.4785  |          | 928.4999  | 911.4734  |
| 19 | 44.0495  | 1910.9858 | 1893.9593 | 1892.9753      | 1938.9807 | 1921.9542 | 1920.9702      |           |           | A    | 825.4366  |           |          | 841.4679  | 824.4413  |
| 20 | 74.0600  | 2012.0335 | 1995.0069 | 1994.0229      | 2040.0284 | 2023.0019 | 2022.0178      | 1996.0386 | 1998.0178 | T    | 724.3889  | 737.4093  | 739.3886 | 770.4308  | 753.4042  |
| 21 | 120.0808 | 2159.1019 | 2142.0754 | 2141.0913      | 2187.0968 | 2170.0703 | 2169.0863      |           |           | F    | 577.3205  |           |          | 669.3831  | 652.3566  |
| 22 | 70.0651  | 2256.1547 | 2239.1281 | 2238.1441      | 2284.1496 | 2267.1230 | 2266.1390      | 2230.1390 |           | P    | 480.2677  | 479.2725  |          | 522.3147  | 505.2881  |
| 23 | 86.0964  | 2369.2387 | 2352.2122 | 2351.2282      | 2397.2337 | 2380.2071 | 2379.2231      | 2341.2074 | 2355.2231 | I    | 367.1837  | 380.2041  | 394.2197 | 425.2619  | 408.2354  |



|    |          |           |           |           |           |           |           |  |  |   |          |         |  |          |          |
|----|----------|-----------|-----------|-----------|-----------|-----------|-----------|--|--|---|----------|---------|--|----------|----------|
| 24 | 110.0713 | 2506.2977 | 2489.2711 | 2488.2871 | 2534.2926 | 2517.2660 | 2516.2820 |  |  | H | 230.1248 |         |  | 312.1779 | 295.1513 |
| 25 | 129.1135 |           |           |           |           |           |           |  |  | R | 74.0237  | 73.0284 |  | 175.1190 | 158.0924 |

| Seq    | ya       | yb       | Seq     | ya       | yb       | Seq     | ya       | yb       |
|--------|----------|----------|---------|----------|----------|---------|----------|----------|
| FN     | 234.1237 | 262.1186 | FNV     | 333.1921 | 361.1870 | FNVL    | 446.2762 | 474.2711 |
| FNVLG  | 503.2976 | 531.2926 | FNVLGE  | 632.3402 | 660.3352 | NV      | 186.1237 | 214.1186 |
| NVL    | 299.2078 | 327.2027 | NVLG    | 356.2292 | 384.2241 | NVLGE   | 485.2718 | 513.2667 |
| NVLGEP | 582.3246 | 610.3195 | NVLGEPV | 681.3930 | 709.3879 | VL      | 185.1648 | 213.1598 |
| VLG    | 242.1863 | 270.1812 | VLGE    | 371.2289 | 399.2238 | VLGEP   | 468.2817 | 496.2766 |
| VLGEPV | 567.3501 | 595.3450 | VLGEPVD | 682.3770 | 710.3719 | LG      | 143.1179 | 171.1128 |
| LGE    | 272.1605 | 300.1554 | LGEP    | 369.2132 | 397.2082 | LGEPV   | 468.2817 | 496.2766 |
| LGEPVD | 583.3086 | 611.3035 | LGEPVDN | 697.3515 | 725.3464 | GE      | 159.0764 | 187.0713 |
| GEP    | 256.1292 | 284.1241 | GEPV    | 355.1976 | 383.1925 | GEPVD   | 470.2245 | 498.2195 |
| GEPVDN | 584.2675 | 612.2624 | GEPVDNL | 697.3515 | 725.3464 | EP      | 199.1077 | 227.1026 |
| EPV    | 298.1761 | 326.1710 | EPVD    | 413.2031 | 441.1980 | EPVDN   | 527.2460 | 555.2409 |
| EPVDNL | 640.3301 | 668.3250 | EPVDNLG | 697.3515 | 725.3464 | PV      | 169.1335 | 197.1285 |
| PVD    | 284.1605 | 312.1554 | PVDN    | 398.2034 | 426.1983 | PVDNL   | 511.2875 | 539.2824 |
| PVDNLG | 568.3089 | 596.3039 | PVDNLGP | 665.3617 | 693.3566 | VD      | 187.1077 | 215.1026 |
| VDN    | 301.1506 | 329.1456 | VDNL    | 414.2347 | 442.2296 | VDNLG   | 471.2562 | 499.2511 |
| VDNLGP | 568.3089 | 596.3039 | VDNLGPV | 667.3774 | 695.3723 | DN      | 202.0822 | 230.0771 |
| DNL    | 315.1663 | 343.1612 | DNLG    | 372.1878 | 400.1827 | DNLGP   | 469.2405 | 497.2354 |
| DNLGPV | 568.3089 | 596.3039 | DNLGPVD | 683.3359 | 711.3308 | NL      | 200.1394 | 228.1343 |
| NLG    | 257.1608 | 285.1557 | NLGP    | 354.2136 | 382.2085 | NLGPV   | 453.2820 | 481.2769 |
| NLGPVD | 568.3089 | 596.3039 | NLGPVDT | 669.3566 | 697.3515 | LG      | 143.1179 | 171.1128 |
| LGP    | 240.1707 | 268.1656 | LGPV    | 339.2391 | 367.2340 | LGPVD   | 454.2660 | 482.2609 |
| LGPVDT | 555.3137 | 583.3086 | LGPVDTs | 642.3457 | 670.3406 | GP      | 127.0866 | 155.0815 |
| GPV    | 226.1550 | 254.1499 | GPVD    | 341.1819 | 369.1769 | GPVDT   | 442.2296 | 470.2245 |
| GPVDTs | 529.2617 | 557.2566 | GPVDTsA | 600.2988 | 628.2937 | PV      | 169.1335 | 197.1285 |
| PVD    | 284.1605 | 312.1554 | PVDT    | 385.2082 | 413.2031 | PVDTs   | 472.2402 | 500.2351 |
| PVDTsA | 543.2773 | 571.2722 | PVDTsAT | 644.3250 | 672.3199 | VD      | 187.1077 | 215.1026 |
| VDT    | 288.1554 | 316.1503 | VDTS    | 375.1874 | 403.1823 | VDTSA   | 446.2245 | 474.2195 |
| VDTSAT | 547.2722 | 575.2671 | VDTSATF | 694.3406 | 722.3355 | DT      | 189.0870 | 217.0819 |
| DTS    | 276.1190 | 304.1139 | DTSAT   | 347.1561 | 375.1510 | DTSAT   | 448.2038 | 476.1987 |
| DTSATF | 595.2722 | 623.2671 | DTSATFP | 692.3250 | 720.3199 | TS      | 161.0921 | 189.0870 |
| TSA    | 232.1292 | 260.1241 | TSAT    | 333.1769 | 361.1718 | TSATF   | 480.2453 | 508.2402 |
| TSATFP | 577.2980 | 605.2930 | TSATFPI | 690.3821 | 718.3770 | SA      | 131.0815 | 159.0764 |
| SAT    | 232.1292 | 260.1241 | SATF    | 379.1976 | 407.1925 | SATFP   | 476.2504 | 504.2453 |
| SATFPI | 589.3344 | 617.3293 | AT      | 145.0972 | 173.0921 | ATF     | 292.1656 | 320.1605 |
| ATFP   | 389.2183 | 417.2132 | ATEFPI  | 502.3024 | 530.2973 | ATEFPIH | 639.3613 | 667.3562 |
| TF     | 221.1285 | 249.1234 | TFP     | 318.1812 | 346.1761 | TFPI    | 431.2653 | 459.2602 |
| TFPIH  | 568.3242 | 596.3191 | FP      | 217.1335 | 245.1285 | FPI     | 330.2176 | 358.2125 |
| FPIH   | 467.2765 | 495.2714 | PI      | 183.1492 | 211.1441 | PIH     | 320.2081 | 348.2030 |
| IH     | 223.1553 | 251.1503 |         |          |          |         |          |          |

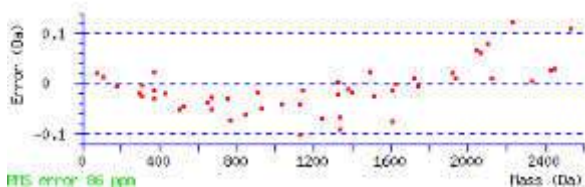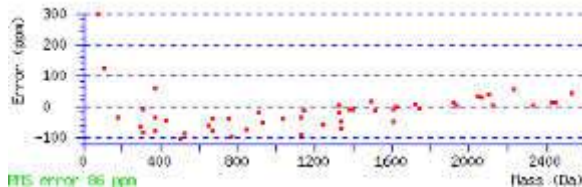

NCBI BLAST search of [IFNVLGEPVDNLGPVDTsATFPIH](#)  
 (Parameters: blastp, nr protein database, expect=20000, no filter, PAM30)  
 Other BLAST [web gateways](#)

All matches to this query

| Score | Mr(calc) | Delta | Sequence |
|-------|----------|-------|----------|
|       |          |       |          |

|       |           |         |                                            |
|-------|-----------|---------|--------------------------------------------|
| 177.0 | 2707.3970 | 0.1360  | <a href="#">IFENVLGEVDNLGPVDTSATFPIHR</a>  |
| 160.7 | 2707.3970 | 0.1360  | <a href="#">IFENVLGEVDNLGPVDTGTFPIHR</a>   |
| 159.1 | 2707.3970 | 0.1361  | <a href="#">IFENVLGEVDNLGPVESSATFPIHR</a>  |
| 158.0 | 2708.3559 | -0.8228 | <a href="#">NFENVLGEVDNLGPVDTGTFPIHR</a>   |
| 144.1 | 2707.3640 | 0.1691  | <a href="#">IFENVLGEVDNLGPVDTSTMSPPIHR</a> |
| 143.6 | 2707.3970 | 0.1360  | <a href="#">IFENVLGEVDNLGPVESGTFPIHR</a>   |
| 142.7 | 2708.3558 | -0.8228 | <a href="#">NFENVLGEVDNLGPVDASTTFPIHR</a>  |
| 142.7 | 2707.3970 | 0.1360  | <a href="#">IFENVIGEPVDNLGPVDASTTFPIHR</a> |
| 142.7 | 2707.3970 | 0.1360  | <a href="#">IFENVLGEVDNLGPVDASTTFPIHR</a>  |
| 142.7 | 2707.3970 | 0.1360  | <a href="#">IFENVLGEVDNLGPVDASTTFPIHR</a>  |

Mascot: <http://www.matrixscience.com/>

**MATRIX SCIENCE Mascot Search Results**

**Peptide View Spot no 90**

MS/MS Fragmentation of **LANAVGVTLGPR**

Found in **gi|115488160** in **NCBI nr**, Os12g0277500 [Oryza sativa Japonica Group]

Match to Query 41: 1166.729224 from(1167.736500,1+) intensity(0.0000) index(14)

Title: Label: D12, Spot\_Id: 219853, Peak\_List\_Id: 227214, MSMS Job\_Run\_Id: 21955, Comment:

Data file C:\Documents and Settings\Administrator\Desktop\Farah-Garima 11May 2013\ppw\_D12\_136868220000.txt

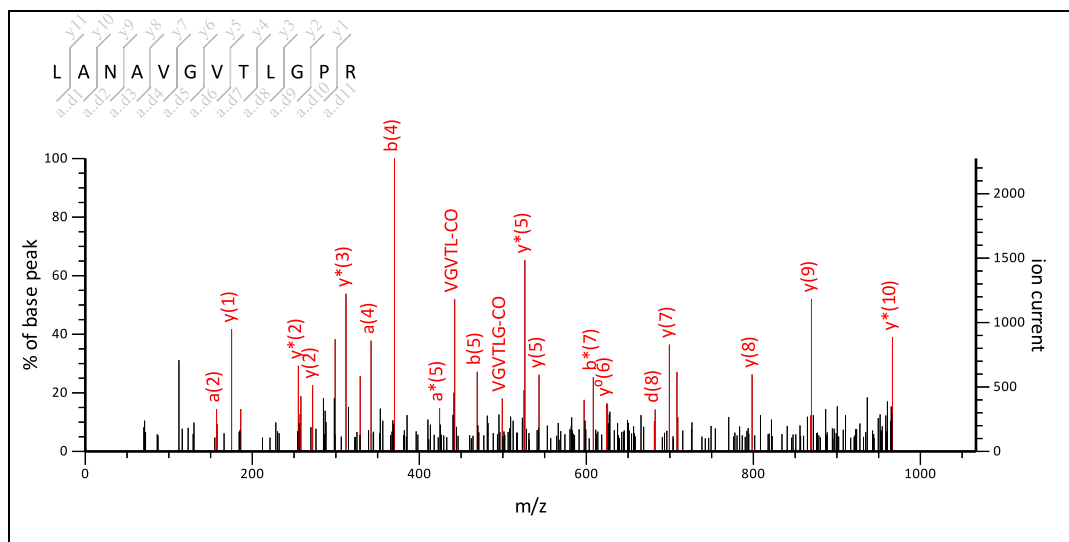

Navigation icons: Home, Back, Forward, Search, and a search range input from 0 to 1066.56.

Label all possible matches  Label matches used for scoring

Monoisotopic mass of neutral peptide Mr(calc): 1166.6772

Fixed modifications: Carbamidomethyl (C) (apply to specified residues or termini only)

Ions Score: 61 Expect: 0.011

Matches : 52/196 fragment ions using 45 most intense peaks [\(help\)](#)

| #  | Immon.   | a               | a*              | a <sup>0</sup> | b               | b*              | b <sup>0</sup>  | d               | d'       | Seq. | v         | w        | w'       | y               | y*              | y <sup>0</sup>  | #  |
|----|----------|-----------------|-----------------|----------------|-----------------|-----------------|-----------------|-----------------|----------|------|-----------|----------|----------|-----------------|-----------------|-----------------|----|
| 1  | 86.0964  | 86.0964         |                 |                | 114.0913        |                 |                 | 44.0495         |          | L    |           |          |          |                 |                 |                 | 12 |
| 2  | 44.0495  | <b>157.1335</b> |                 |                | 185.1285        |                 |                 |                 |          | A    | 1038.5691 |          |          | 1054.6004       | 1037.5738       | 1036.5898       | 11 |
| 3  | 87.0553  | 271.1765        | 254.1499        |                | <b>299.1714</b> | 282.1448        |                 | 228.1707        |          | N    | 924.5261  | 923.5309 |          | 983.5633        | <b>966.5367</b> | 965.5527        | 10 |
| 4  | 44.0495  | <b>342.2136</b> | 325.1870        |                | <b>370.2085</b> | 353.1819        |                 |                 |          | A    | 853.4890  |          |          | <b>869.5203</b> | 852.4938        | 851.5098        | 9  |
| 5  | 72.0808  | <b>441.2820</b> | <b>424.2554</b> |                | <b>469.2769</b> | 452.2504        |                 | 427.2663        |          | V    | 754.4206  | 767.4410 |          | <b>798.4832</b> | 781.4567        | 780.4727        | 8  |
| 6  | 30.0338  | 498.3035        | 481.2769        |                | <b>526.2984</b> | 509.2718        |                 |                 |          | G    |           |          |          | <b>699.4148</b> | <b>682.3883</b> | <b>681.4042</b> | 7  |
| 7  | 72.0808  | <b>597.3719</b> | 580.3453        |                | <b>625.3668</b> | <b>608.3402</b> |                 | 583.3562        |          | V    | 598.3307  | 611.3511 |          | 642.3933        | <b>625.3668</b> | <b>624.3828</b> | 6  |
| 8  | 74.0600  | 698.4196        | <b>681.3930</b> | 680.4090       | 726.4145        | <b>709.3879</b> | <b>708.4039</b> | <b>682.4246</b> | 684.4039 | T    | 497.2831  | 510.3035 | 512.2827 | <b>543.3249</b> | <b>526.2984</b> | <b>525.3144</b> | 5  |
| 9  | 86.0964  | 811.5036        | 794.4771        | 793.4931       | 839.4985        | 822.4720        | 821.4880        | 769.4567        |          | L    | 384.1990  | 383.2037 |          | <b>442.2772</b> | 425.2507        |                 | 4  |
| 10 | 30.0338  | <b>868.5251</b> | 851.4985        | 850.5145       | 896.5200        | 879.4934        | 878.5094        |                 |          | G    |           |          |          | <b>329.1932</b> | <b>312.1666</b> |                 | 3  |
| 11 | 70.0651  | 965.5778        | 948.5513        | 947.5673       | 993.5728        | 976.5462        | 975.5622        | 939.5622        |          | P    | 230.1248  | 229.1295 |          | <b>272.1717</b> | <b>255.1452</b> |                 | 2  |
| 12 | 129.1135 |                 |                 |                |                 |                 |                 |                 |          | R    | 74.0237   | 73.0284  |          | <b>175.1190</b> | <b>158.0924</b> |                 | 1  |

| Seq     | ya              | yb              | Seq      | ya              | yb              | Seq      | ya              | yb              |
|---------|-----------------|-----------------|----------|-----------------|-----------------|----------|-----------------|-----------------|
| AN      | 158.0924        | 186.0873        | ANA      | 229.1295        | 257.1244        | ANAV     | 328.1979        | 356.1928        |
| ANAVG   | 385.2194        | 413.2143        | ANAVGV   | 484.2878        | 512.2827        | ANAVGVT  | 585.3355        | 613.3304        |
| ANAVGVT | 698.4196        | 726.4145        | NA       | 158.0924        | 186.0873        | NAV      | 257.1608        | 285.1557        |
| NAVG    | 314.1823        | <b>342.1772</b> | NAVG     | 413.2507        | <b>441.2456</b> | NAVGVT   | 514.2984        | 542.2933        |
| NAVGVT  | 627.3824        | 655.3774        | NAVGVTLG | 684.4039        | 712.3988        | AV       | 143.1179        | 171.1128        |
| AVG     | 200.1394        | 228.1343        | AVG      | <b>299.2078</b> | 327.2027        | AVGVT    | 400.2554        | 428.2504        |
| AVGVT   | 513.3395        | 541.3344        | AVGVTLG  | 570.3610        | 598.3559        | AVGVTLGP | 667.4137        | 695.4087        |
| VG      | 129.1022        | <b>157.0972</b> | VG       | 228.1707        | 256.1656        | VGVT     | <b>329.2183</b> | 357.2132        |
| VGVT    | <b>442.3024</b> | 470.2973        | VGVTLG   | <b>499.3239</b> | 527.3188        | VGVTLGP  | 596.3766        | <b>624.3715</b> |

|              |          |                 |               |          |                 |              |          |          |
|--------------|----------|-----------------|---------------|----------|-----------------|--------------|----------|----------|
| <b>GV</b>    | 129.1022 | <b>157.0972</b> | <b>GVT</b>    | 230.1499 | <b>258.1448</b> | <b>GVTL</b>  | 343.2340 | 371.2289 |
| <b>GVTLG</b> | 400.2554 | 428.2504        | <b>GVTLGP</b> | 497.3082 | <b>525.3031</b> | <b>VT</b>    | 173.1285 | 201.1234 |
| <b>VTL</b>   | 286.2125 | 314.2074        | <b>VTLG</b>   | 343.2340 | 371.2289        | <b>VTLGP</b> | 440.2867 | 468.2817 |
| <b>TL</b>    | 187.1441 | 215.1390        | <b>TLG</b>    | 244.1656 | <b>272.1605</b> | <b>TLGP</b>  | 341.2183 | 369.2132 |
| <b>LG</b>    | 143.1179 | 171.1128        | <b>LGP</b>    | 240.1707 | 268.1656        | <b>GP</b>    | 127.0866 | 155.0815 |

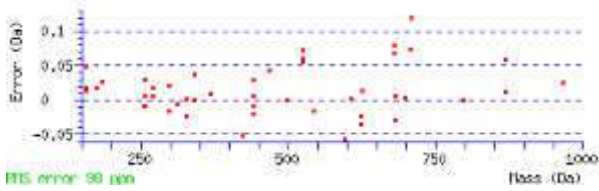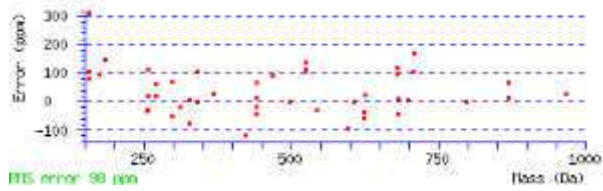

NCBI **BLAST** search of [LANAVGVTLGPR](#)

(Parameters: blastp, nr protein database, expect=20000, no filter, PAM30)

Other BLAST [web gateways](#)

#### All matches to this query

| Score | M <sub>r</sub> (calc) | Delta  | Sequence                       |
|-------|-----------------------|--------|--------------------------------|
| 60.9  | 1166.6772             | 0.0521 | <a href="#">LANAVGVTLGPR</a>   |
| 42.9  | 1166.6771             | 0.0521 | <a href="#">AKVAVEQLGPR</a>    |
| 42.8  | 1166.6519             | 0.0773 | <a href="#">AAIAAAAREAAPR</a>  |
| 39.5  | 1166.6408             | 0.0884 | <a href="#">VGGAGVIAVPDGR</a>  |
| 38.2  | 1166.6884             | 0.0408 | <a href="#">VRAAAGTVVAPR</a>   |
| 37.1  | 1166.6884             | 0.0408 | <a href="#">TRIAVQGIGPR</a>    |
| 36.2  | 1166.6884             | 0.0409 | <a href="#">VNAIAPVARTR</a>    |
| 35.4  | 1166.6771             | 0.0521 | <a href="#">GAQIVKELGPR</a>    |
| 34.6  | 1166.6520             | 0.0772 | <a href="#">AARVAAEAGVPR</a>   |
| 33.5  | 1166.6520             | 0.0772 | <a href="#">VGAAAFAEARGLPR</a> |

Mascot: <http://www.matrixscience.com/>

**MATRIX SCIENCE Mascot Search Results**

**Peptide View Spot no 90**

MS/MS Fragmentation of **GYISPQFVTNLEK**

Found in **gi|115488160** in **NCBItr**, Os12g0277500 [Oryza sativa Japonica Group]

Match to Query 56: 1494.815124 from(1495.822400,1+) intensity(0.0000) index(18)

Title: Label: D12, Spot\_Id: 219853, Peak\_List\_Id: 227229, MSMS Job\_Run\_Id: 21955, Comment:

Data file C:\Documents and Settings\Administrator\Desktop\Farah-Garima 11May 2013\ppw\_D12\_136868220000.txt

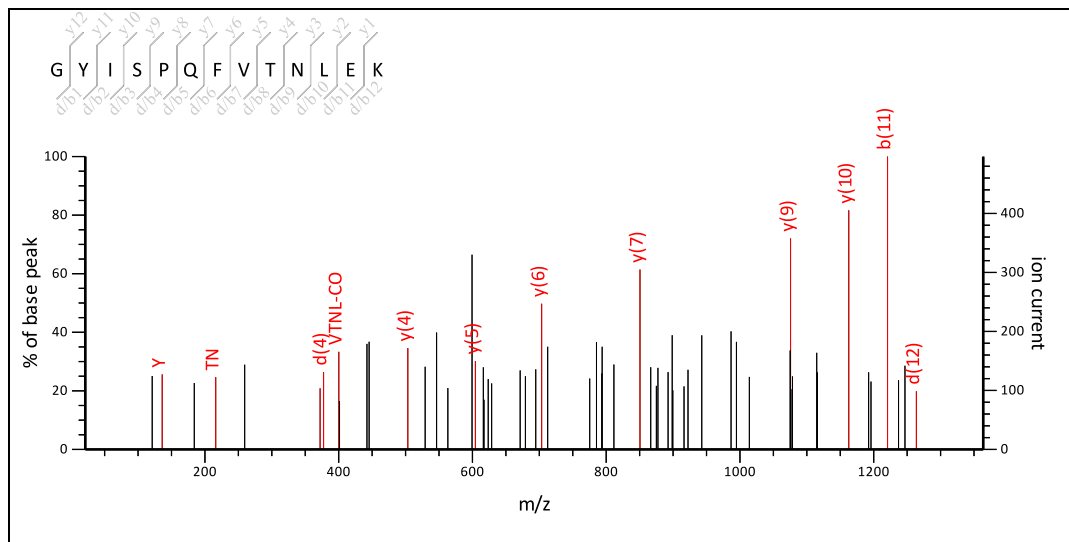

Navigation icons: Home, Back, Forward, Search, Print, Refresh. Search range: 21.14 to 1363.82

Label all possible matches  Label matches used for scoring

Monoisotopic mass of neutral peptide Mr(calc): 1494.7718

Fixed modifications: Carbamidomethyl (C) (apply to specified residues or termini only)

Ions Score: 19 Expect: 3.5e+02

Matches : 14/216 fragment ions using 34 most intense peaks [\(help\)](#)

| #  | Immon.   | a         | a*        | a <sup>0</sup> | b         | b*        | b <sup>0</sup> | d         | d'       | Seq. | v         | w         | w'        | y         | y*        |
|----|----------|-----------|-----------|----------------|-----------|-----------|----------------|-----------|----------|------|-----------|-----------|-----------|-----------|-----------|
| 1  | 30.0338  | 30.0338   |           |                | 58.0287   |           |                | 44.0495   |          | G    |           |           |           |           |           |
| 2  | 136.0757 | 193.0972  |           |                | 221.0921  |           |                |           |          | Y    | 1330.7001 |           |           | 1438.7577 | 1421.7311 |
| 3  | 86.0964  | 306.1812  |           |                | 334.1761  |           |                | 278.1499  | 292.1656 | I    | 1217.6161 | 1230.6365 | 1244.6521 | 1275.6943 | 1258.6678 |
| 4  | 60.0444  | 393.2132  |           | 375.2027       | 421.2082  |           | 403.1976       | 377.2183  |          | S    | 1130.5841 | 1129.5888 |           | 1162.6103 | 1145.5837 |
| 5  | 70.0651  | 490.2660  |           | 472.2554       | 518.2609  |           | 500.2504       | 464.2504  |          | P    | 1033.5313 | 1032.5360 |           | 1075.5782 | 1058.5517 |
| 6  | 101.0709 | 618.3246  | 601.2980  | 600.3140       | 646.3195  | 629.2930  | 628.3089       | 561.3031  |          | Q    | 905.4727  | 904.4775  |           | 978.5255  | 961.4989  |
| 7  | 120.0808 | 765.3930  | 748.3665  | 747.3824       | 793.3879  | 776.3614  | 775.3774       |           |          | F    | 758.4043  |           |           | 850.4669  | 833.4403  |
| 8  | 72.0808  | 864.4614  | 847.4349  | 846.4509       | 892.4563  | 875.4298  | 874.4458       | 850.4458  |          | V    | 659.3359  | 672.3563  |           | 703.3985  | 686.3719  |
| 9  | 74.0600  | 965.5091  | 948.4825  | 947.4985       | 993.5040  | 976.4775  | 975.4934       | 949.5142  | 951.4934 | T    | 558.2882  | 571.3086  | 573.2879  | 604.3301  | 587.3035  |
| 10 | 87.0553  | 1079.5520 | 1062.5255 | 1061.5415      | 1107.5469 | 1090.5204 | 1089.5364      | 1036.5462 |          | N    | 444.2453  | 443.2500  |           | 503.2824  | 486.2558  |
| 11 | 86.0964  | 1192.6361 | 1175.6095 | 1174.6255      | 1220.6310 | 1203.6045 | 1202.6204      | 1150.5891 |          | L    | 331.1612  | 330.1660  |           | 389.2395  | 372.2129  |
| 12 | 102.0550 | 1321.6787 | 1304.6521 | 1303.6681      | 1349.6736 | 1332.6470 | 1331.6630      | 1263.6732 |          | E    | 202.1186  | 201.1234  |           | 276.1554  | 259.1288  |
| 13 | 101.1073 |           |           |                |           |           |                |           |          | K    | 74.0237   | 73.0284   |           | 147.1128  | 130.0863  |

| Seq    | ya       | yb       | Seq    | ya       | yb       | Seq    | ya       | yb       |
|--------|----------|----------|--------|----------|----------|--------|----------|----------|
| YI     | 249.1598 | 277.1547 | YIS    | 336.1918 | 364.1867 | YISP   | 433.2445 | 461.2395 |
| YISPQ  | 561.3031 | 589.2980 | IS     | 173.1285 | 201.1234 | ISP    | 270.1812 | 298.1761 |
| ISPQ   | 398.2398 | 426.2347 | ISPQF  | 545.3082 | 573.3031 | ISPQFV | 644.3766 | 672.3715 |
| SP     | 157.0972 | 185.0921 | SPQ    | 285.1557 | 313.1506 | SPQF   | 432.2241 | 460.2191 |
| SPQFV  | 531.2926 | 559.2875 | SPQFVT | 632.3402 | 660.3352 | PQ     | 198.1237 | 226.1186 |
| PQF    | 345.1921 | 373.1870 | PQFV   | 444.2605 | 472.2554 | PQFVT  | 545.3082 | 573.3031 |
| PQFVTN | 659.3511 | 687.3461 | QF     | 248.1394 | 276.1343 | QFV    | 347.2078 | 375.2027 |
| QFVT   | 448.2554 | 476.2504 | QFVTN  | 562.2984 | 590.2933 | QFVTNL | 675.3824 | 703.3774 |

|                       |          |          |                        |          |          |                       |          |          |
|-----------------------|----------|----------|------------------------|----------|----------|-----------------------|----------|----------|
| <a href="#">FV</a>    | 219.1492 | 247.1441 | <a href="#">FVT</a>    | 320.1969 | 348.1918 | <a href="#">FVTN</a>  | 434.2398 | 462.2347 |
| <a href="#">FVTNL</a> | 547.3239 | 575.3188 | <a href="#">FVTNLE</a> | 676.3665 | 704.3614 | <a href="#">VT</a>    | 173.1285 | 201.1234 |
| <a href="#">VTN</a>   | 287.1714 | 315.1663 | <a href="#">VTNL</a>   | 400.2554 | 428.2504 | <a href="#">VTNLE</a> | 529.2980 | 557.2930 |
| <a href="#">TN</a>    | 188.1030 | 216.0979 | <a href="#">TNL</a>    | 301.1870 | 329.1819 | <a href="#">TNLE</a>  | 430.2296 | 458.2245 |
| <a href="#">NL</a>    | 200.1394 | 228.1343 | <a href="#">NLE</a>    | 329.1819 | 357.1769 | <a href="#">LE</a>    | 215.1390 | 243.1339 |

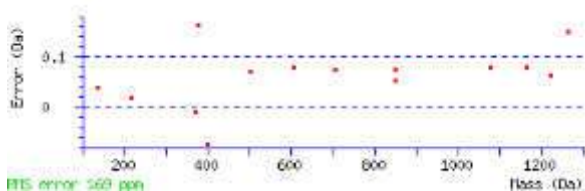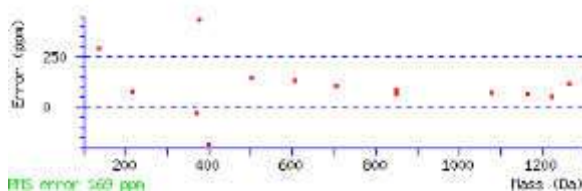

NCBI **BLAST** search of [GYISPOFVTNLEK](#)

(Parameters: blastp, nr protein database, expect=20000, no filter, PAM30)

Other BLAST [web gateways](#)

#### All matches to this query

| Score | Mr(calc)  | Delta   | Sequence                       |
|-------|-----------|---------|--------------------------------|
| 19.2  | 1494.7718 | 0.0433  | <a href="#">GYISPOFVTNLEK</a>  |
| 18.4  | 1494.7718 | 0.0433  | <a href="#">FOPEKYVLNTEK</a>   |
| 10.2  | 1494.8770 | -0.0618 | <a href="#">GGDVISRVIPLLEK</a> |
| 9.1   | 1494.7718 | 0.0433  | <a href="#">YVAPENGGLLAYTK</a> |
| 8.4   | 1494.7235 | 0.0916  | <a href="#">SKALESDEVMAATK</a> |
| 8.4   | 1494.7790 | 0.0361  | <a href="#">TLASEPPPGQNKTR</a> |
| 8.3   | 1494.7712 | 0.0439  | <a href="#">MTSTLRRTQDLK</a>   |
| 7.9   | 1494.7653 | 0.0498  | <a href="#">SLGYPGAMKWLTR</a>  |
| 7.6   | 1494.7565 | 0.0586  | <a href="#">QSTEKEVLAYAEK</a>  |
| 7.1   | 1494.7534 | 0.0617  | <a href="#">IMRNAMAITLTEK</a>  |

Mascot: <http://www.matrixscience.com/>

**MATRIX SCIENCE Mascot Search Results**

**Peptide View Spot no 90**

MS/MS Fragmentation of **AIELYDPMENAGAALIR**

Found in **gi|115488160** in **NCBI nr**, Os12g0277500 [Oryza sativa Japonica Group]

Match to Query 63: 1846.017124 from(1847.024400,1+) intensity(0.0000) index(21)

Title: Label: D12, Spot\_Id: 219853, Peak\_List\_Id: 227218, MSMS Job\_Run\_Id: 21955, Comment:

Data file C:\Documents and Settings\Administrator\Desktop\Farah-Garima 11May 2013\ppw\_D12\_136868220000.txt

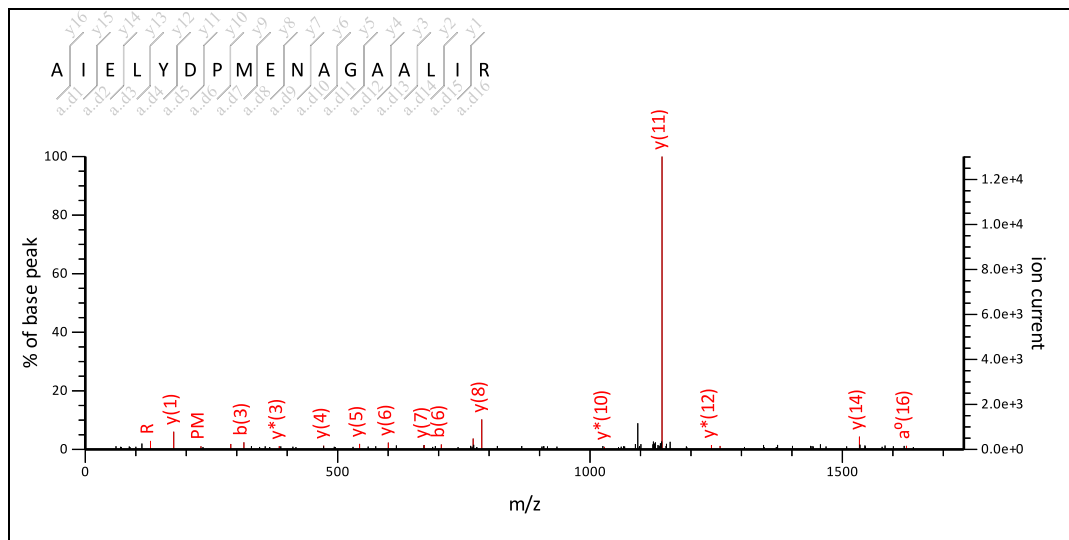

Navigation icons: Home, Back, Forward, Search, Print, etc. Range: 0 to 1740.62

Label all possible matches  Label matches used for scoring

Monoisotopic mass of neutral peptide Mr(calc): 1845.9294

Fixed modifications: Carbamidomethyl (C) (apply to specified residues or termini only)

Ions Score: 65 Expect: 0.0073

Matches: 28/293 fragment ions using 32 most intense peaks [\(help\)](#)

| #  | Immon.   | a         | a*        | a <sup>0</sup> | b         | b*        | b <sup>0</sup> | d         | d'        | Seq. | v         | w         | w'        | y         | y*        |
|----|----------|-----------|-----------|----------------|-----------|-----------|----------------|-----------|-----------|------|-----------|-----------|-----------|-----------|-----------|
| 1  | 44.0495  | 44.0495   |           |                | 72.0444   |           |                | 44.0495   |           | A    |           |           |           |           |           |
| 2  | 86.0964  | 157.1335  |           |                | 185.1285  |           |                | 129.1022  | 143.1179  | I    | 1717.8214 | 1730.8418 | 1744.8574 | 1775.8996 | 1758.8731 |
| 3  | 102.0550 | 286.1761  |           | 268.1656       | 314.1710  |           | 296.1605       | 228.1707  |           | E    | 1588.7788 | 1587.7836 |           | 1662.8156 | 1645.7890 |
| 4  | 86.0964  | 399.2602  |           | 381.2496       | 427.2551  |           | 409.2445       | 357.2132  |           | L    | 1475.6947 | 1474.6995 |           | 1533.7730 | 1516.7464 |
| 5  | 136.0757 | 562.3235  |           | 544.3130       | 590.3184  |           | 572.3079       |           |           | Y    | 1312.6314 |           |           | 1420.6889 | 1403.6624 |
| 6  | 88.0393  | 677.3505  |           | 659.3399       | 705.3454  |           | 687.3348       | 633.3606  |           | D    | 1197.6045 | 1196.6092 |           | 1257.6256 | 1240.5990 |
| 7  | 70.0651  | 774.4032  |           | 756.3927       | 802.3981  |           | 784.3876       | 748.3876  |           | P    | 1100.5517 | 1099.5565 |           | 1142.5987 | 1125.5721 |
| 8  | 104.0528 | 905.4437  |           | 887.4332       | 933.4386  |           | 915.4281       | 845.4403  |           | M    | 969.5112  | 968.5160  |           | 1045.5459 | 1028.5193 |
| 9  | 102.0550 | 1034.4863 |           | 1016.4757      | 1062.4812 |           | 1044.4707      | 976.4808  |           | E    | 840.4686  | 839.4734  |           | 914.5054  | 897.4789  |
| 10 | 87.0553  | 1148.5292 | 1131.5027 | 1130.5187      | 1176.5242 | 1159.4976 | 1158.5136      | 1105.5234 |           | N    | 726.4257  | 725.4305  |           | 785.4628  | 768.4363  |
| 11 | 44.0495  | 1219.5664 | 1202.5398 | 1201.5558      | 1247.5613 | 1230.5347 | 1229.5507      |           |           | A    | 655.3886  |           |           | 671.4199  | 654.3933  |
| 12 | 30.0338  | 1276.5878 | 1259.5613 | 1258.5772      | 1304.5827 | 1287.5562 | 1286.5722      |           |           | G    |           |           |           | 600.3828  | 583.3562  |
| 13 | 44.0495  | 1347.6249 | 1330.5984 | 1329.6144      | 1375.6198 | 1358.5933 | 1357.6093      |           |           | A    | 527.3300  |           |           | 543.3613  | 526.3348  |
| 14 | 44.0495  | 1418.6620 | 1401.6355 | 1400.6515      | 1446.6570 | 1429.6304 | 1428.6464      |           |           | A    | 456.2929  |           |           | 472.3242  | 455.2976  |
| 15 | 86.0964  | 1531.7461 | 1514.7196 | 1513.7355      | 1559.7410 | 1542.7145 | 1541.7305      | 1489.6992 |           | L    | 343.2088  | 342.2136  |           | 401.2871  | 384.2605  |
| 16 | 86.0964  | 1644.8302 | 1627.8036 | 1626.8196      | 1672.8251 | 1655.7985 | 1654.8145      | 1616.7989 | 1630.8145 | I    | 230.1248  | 243.1452  | 257.1608  | 288.2030  | 271.1765  |
| 17 | 129.1135 |           |           |                |           |           |                |           |           | R    | 74.0237   | 73.0284   |           | 175.1190  | 158.0924  |

| Seq   | ya       | yb       | Seq   | ya       | yb       | Seq   | ya       | yb       |
|-------|----------|----------|-------|----------|----------|-------|----------|----------|
| IE    | 215.1390 | 243.1339 | IEL   | 328.2231 | 356.2180 | IELY  | 491.2864 | 519.2813 |
| IELYD | 606.3134 | 634.3083 | EL    | 215.1390 | 243.1339 | ELY   | 378.2023 | 406.1973 |
| ELYD  | 493.2293 | 521.2242 | ELYDP | 590.2821 | 618.2770 | LY    | 249.1598 | 277.1547 |
| LYD   | 364.1867 | 392.1816 | LYDP  | 461.2395 | 489.2344 | LYDPM | 592.2799 | 620.2749 |



|                |          |          |              |          |          |               |          |          |
|----------------|----------|----------|--------------|----------|----------|---------------|----------|----------|
| <b>YD</b>      | 251.1026 | 279.0975 | <b>YDP</b>   | 348.1554 | 376.1503 | <b>YDPM</b>   | 479.1959 | 507.1908 |
| <b>YDPM</b>    | 608.2385 | 636.2334 | <b>DP</b>    | 185.0921 | 213.0870 | <b>DPM</b>    | 316.1326 | 344.1275 |
| <b>DPME</b>    | 445.1751 | 473.1701 | <b>DPMEN</b> | 559.2181 | 587.2130 | <b>DPMENA</b> | 630.2552 | 658.2501 |
| <b>DPMENAG</b> | 687.2767 | 715.2716 | <b>PM</b>    | 201.1056 | 229.1005 | <b>PME</b>    | 330.1482 | 358.1431 |
| <b>PMEN</b>    | 444.1911 | 472.1860 | <b>PMENA</b> | 515.2282 | 543.2232 | <b>PMENAG</b> | 572.2497 | 600.2446 |
| <b>PMENAGA</b> | 643.2868 | 671.2817 | <b>ME</b>    | 233.0954 | 261.0904 | <b>MEN</b>    | 347.1384 | 375.1333 |
| <b>MENA</b>    | 418.1755 | 446.1704 | <b>MENAG</b> | 475.1969 | 503.1919 | <b>MENAGA</b> | 546.2341 | 574.2290 |
| <b>MENAGAA</b> | 617.2712 | 645.2661 | <b>EN</b>    | 216.0979 | 244.0928 | <b>ENA</b>    | 287.1350 | 315.1299 |
| <b>ENAG</b>    | 344.1565 | 372.1514 | <b>ENAGA</b> | 415.1936 | 443.1885 | <b>ENAGAA</b> | 486.2307 | 514.2256 |
| <b>ENAGAAL</b> | 599.3148 | 627.3097 | <b>NA</b>    | 158.0924 | 186.0873 | <b>NAG</b>    | 215.1139 | 243.1088 |
| <b>NAGA</b>    | 286.1510 | 314.1459 | <b>NAGAA</b> | 357.1881 | 385.1830 | <b>NAGAAL</b> | 470.2722 | 498.2671 |
| <b>NAGAALI</b> | 583.3562 | 611.3511 | <b>AG</b>    | 101.0709 | 129.0659 | <b>AGA</b>    | 172.1081 | 200.1030 |
| <b>AGAA</b>    | 243.1452 | 271.1401 | <b>AGAAL</b> | 356.2292 | 384.2241 | <b>AGAALI</b> | 469.3133 | 497.3082 |
| <b>GA</b>      | 101.0709 | 129.0659 | <b>GAA</b>   | 172.1081 | 200.1030 | <b>GAAL</b>   | 285.1921 | 313.1870 |
| <b>GAALI</b>   | 398.2762 | 426.2711 | <b>AA</b>    | 115.0866 | 143.0815 | <b>AAL</b>    | 228.1707 | 256.1656 |
| <b>AALI</b>    | 341.2547 | 369.2496 | <b>AL</b>    | 157.1335 | 185.1285 | <b>ALI</b>    | 270.2176 | 298.2125 |
| <b>LI</b>      | 199.1805 | 227.1754 |              |          |          |               |          |          |

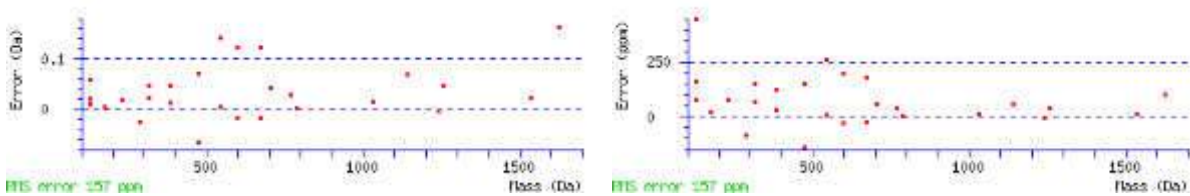

NCBI BLAST search of [AIELYDPMENAGAALIR](#)

(Parameters: blastp, nr protein database, expect=20000, no filter, PAM30)

Other BLAST [web gateways](#)

#### All matches to this query

| Score | Mr(calc)  | Delta  | Sequence                            |
|-------|-----------|--------|-------------------------------------|
| 65.4  | 1845.9294 | 0.0877 | <a href="#">AIELYDPMENAGAALIR</a>   |
| 28.4  | 1845.9155 | 0.1016 | <a href="#">CIVINAPAFRDNTEAR</a>    |
| 28.3  | 1845.8890 | 0.1281 | <a href="#">RMEASLDNENAKPDLK</a>    |
| 24.8  | 1845.9230 | 0.0942 | <a href="#">LDAPEMCPVFAGRVIR</a>    |
| 24.2  | 1846.0101 | 0.0071 | <a href="#">QAIYTAAF AAPAGAALLR</a> |
| 19.6  | 1845.9149 | 0.1023 | <a href="#">AELLYDVIDKSDFYR</a>     |
| 19.2  | 1845.8969 | 0.1202 | <a href="#">RWISEIENGTATEAR</a>     |
| 17.7  | 1845.8527 | 0.1644 | <a href="#">DVNMGGDTPVSAALQER</a>   |
| 17.4  | 1845.8817 | 0.1354 | <a href="#">VTLGGDGAEDARATTAADR</a> |
| 17.2  | 1845.8832 | 0.1339 | <a href="#">GFDCGPANALLDAWALR</a>   |

Mascot: <http://www.matrixscience.com/>

**MATRIX SCIENCE Mascot Search Results**

**Peptide View Spot no 90**

MS/MS Fragmentation of **AIELYDPMENAGAALIR**

Found in **gi|115488160** in **NCBI nr**, Os12g0277500 [Oryza sativa Japonica Group]

Match to Query 65: 1862.005224 from(1863.012500,1+) intensity(0.0000) index(22)

Title: Label: D12, Spot\_Id: 219853, Peak\_List\_Id: 227217, MSMS Job\_Run\_Id: 21955, Comment:

Data file C:\Documents and Settings\Administrator\Desktop\Farah-Garima 11May 2013\ppw\_D12\_136868220000.txt

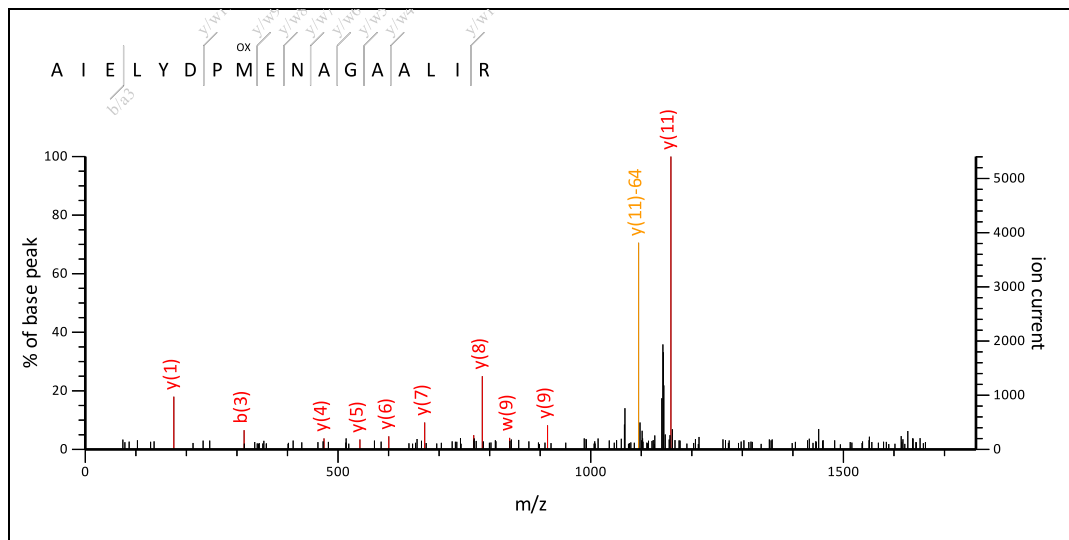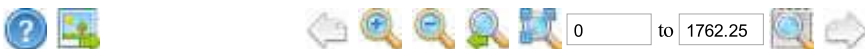

Label all possible matches  Label matches used for scoring

Monoisotopic mass of neutral peptide Mr(calc): 1861.9243

Fixed modifications: Carbamidomethyl (C) (apply to specified residues or termini only)

Variable modifications:

M8 : Oxidation (M), with neutral losses 0.0000 (shown in table), 63.9983

Ions Score: 33 Expect: 13

Matches : 14/419 fragment ions using 32 most intense peaks (help)

| #  | Immon.   | a         | a*        | a <sup>0</sup> | b         | b*        | b <sup>0</sup> | d         | d'        | Seq. | v         | w         | w'        | y         | y*        |
|----|----------|-----------|-----------|----------------|-----------|-----------|----------------|-----------|-----------|------|-----------|-----------|-----------|-----------|-----------|
| 1  | 44.0495  | 44.0495   |           |                | 72.0444   |           |                | 44.0495   |           | A    |           |           |           |           |           |
| 2  | 86.0964  | 157.1335  |           |                | 185.1285  |           |                | 129.1022  | 143.1179  | I    | 1733.8163 | 1746.8367 | 1760.8524 | 1791.8946 | 1774.8680 |
| 3  | 102.0550 | 286.1761  |           | 268.1656       | 314.1710  |           | 296.1605       | 228.1707  |           | E    | 1604.7737 | 1603.7785 |           | 1678.8105 | 1661.7839 |
| 4  | 86.0964  | 399.2602  |           | 381.2496       | 427.2551  |           | 409.2445       | 357.2132  |           | L    | 1491.6897 | 1490.6944 |           | 1549.7679 | 1532.7414 |
| 5  | 136.0757 | 562.3235  |           | 544.3130       | 590.3184  |           | 572.3079       |           |           | Y    | 1328.6263 |           |           | 1436.6838 | 1419.6573 |
| 6  | 88.0393  | 677.3505  |           | 659.3399       | 705.3454  |           | 687.3348       | 633.3606  |           | D    | 1213.5994 | 1212.6041 |           | 1273.6205 | 1256.5940 |
| 7  | 70.0651  | 774.4032  |           | 756.3927       | 802.3981  |           | 784.3876       | 748.3876  |           | P    | 1116.5466 | 1115.5514 |           | 1158.5936 | 1141.5670 |
| 8  | 120.0478 | 921.4386  |           | 903.4281       | 949.4335  |           | 931.4230       | 845.4403  |           | M    | 969.5112  | 968.5160  |           | 1061.5408 | 1044.5143 |
| 9  | 102.0550 | 1050.4812 |           | 1032.4707      | 1078.4761 |           | 1060.4656      | 992.4757  |           | E    | 840.4686  | 839.4734  |           | 914.5054  | 897.4789  |
| 10 | 87.0553  | 1164.5242 | 1147.4976 | 1146.5136      | 1192.5191 | 1175.4925 | 1174.5085      | 1121.5183 |           | N    | 726.4257  | 725.4305  |           | 785.4628  | 768.4363  |
| 11 | 44.0495  | 1235.5613 | 1218.5347 | 1217.5507      | 1263.5562 | 1246.5296 | 1245.5456      |           |           | A    | 655.3886  |           |           | 671.4199  | 654.3933  |
| 12 | 30.0338  | 1292.5827 | 1275.5562 | 1274.5722      | 1320.5776 | 1303.5511 | 1302.5671      |           |           | G    |           |           |           | 600.3828  | 583.3562  |
| 13 | 44.0495  | 1363.6198 | 1346.5933 | 1345.6093      | 1391.6148 | 1374.5882 | 1373.6042      |           |           | A    | 527.3300  |           |           | 543.3613  | 526.3348  |
| 14 | 44.0495  | 1434.6570 | 1417.6304 | 1416.6464      | 1462.6519 | 1445.6253 | 1444.6413      |           |           | A    | 456.2929  |           |           | 472.3242  | 455.2976  |
| 15 | 86.0964  | 1547.7410 | 1530.7145 | 1529.7305      | 1575.7359 | 1558.7094 | 1557.7254      | 1505.6941 |           | L    | 343.2088  | 342.2136  |           | 401.2871  | 384.2605  |
| 16 | 86.0964  | 1660.8251 | 1643.7985 | 1642.8145      | 1688.8200 | 1671.7935 | 1670.8094      | 1632.7938 | 1646.8094 | I    | 230.1248  | 243.1452  | 257.1608  | 288.2030  | 271.1765  |
| 17 | 129.1135 |           |           |                |           |           |                |           |           | R    | 74.0237   | 73.0284   |           | 175.1190  | 158.0924  |

| Seq | ya       | yb       | Seq | ya       | yb       | Seq  | ya       | yb       |
|-----|----------|----------|-----|----------|----------|------|----------|----------|
| IE  | 215.1390 | 243.1339 | IEL | 328.2231 | 356.2180 | IELY | 491.2864 | 519.2813 |

|                       |          |          |                        |          |          |                         |          |          |
|-----------------------|----------|----------|------------------------|----------|----------|-------------------------|----------|----------|
| <a href="#">IELYD</a> | 606.3134 | 634.3083 | <a href="#">EL</a>     | 215.1390 | 243.1339 | <a href="#">ELY</a>     | 378.2023 | 406.1973 |
| <a href="#">ELYD</a>  | 493.2293 | 521.2242 | <a href="#">ELYDP</a>  | 590.2821 | 618.2770 | <a href="#">LY</a>      | 249.1598 | 277.1547 |
| <a href="#">LYD</a>   | 364.1867 | 392.1816 | <a href="#">LYDP</a>   | 461.2395 | 489.2344 | <a href="#">LYDPM</a>   | 608.2749 | 636.2698 |
| <a href="#">YD</a>    | 251.1026 | 279.0975 | <a href="#">YDP</a>    | 348.1554 | 376.1503 | <a href="#">YDPM</a>    | 495.1908 | 523.1857 |
| <a href="#">YDPME</a> | 624.2334 | 652.2283 | <a href="#">DP</a>     | 185.0921 | 213.0870 | <a href="#">DPM</a>     | 332.1275 | 360.1224 |
| <a href="#">DPME</a>  | 461.1701 | 489.1650 | <a href="#">DPMEN</a>  | 575.2130 | 603.2079 | <a href="#">DPMENA</a>  | 646.2501 | 674.2450 |
| <a href="#">PM</a>    | 217.1005 | 245.0954 | <a href="#">PME</a>    | 346.1431 | 374.1380 | <a href="#">PMEN</a>    | 460.1860 | 488.1810 |
| <a href="#">PMENA</a> | 531.2232 | 559.2181 | <a href="#">PMENAG</a> | 588.2446 | 616.2395 | <a href="#">PMENAGA</a> | 659.2817 | 687.2767 |
| <a href="#">ME</a>    | 249.0904 | 277.0853 | <a href="#">MEN</a>    | 363.1333 | 391.1282 | <a href="#">MENA</a>    | 434.1704 | 462.1653 |
| <a href="#">MENAG</a> | 491.1919 | 519.1868 | <a href="#">MENAGA</a> | 562.2290 | 590.2239 | <a href="#">MENAGAA</a> | 633.2661 | 661.2610 |
| <a href="#">EN</a>    | 216.0979 | 244.0928 | <a href="#">ENA</a>    | 287.1350 | 315.1299 | <a href="#">ENAG</a>    | 344.1565 | 372.1514 |
| <a href="#">ENAGA</a> | 415.1936 | 443.1885 | <a href="#">ENAGAA</a> | 486.2307 | 514.2256 | <a href="#">ENAGAAL</a> | 599.3148 | 627.3097 |
| <a href="#">NA</a>    | 158.0924 | 186.0873 | <a href="#">NAG</a>    | 215.1139 | 243.1088 | <a href="#">NAGA</a>    | 286.1510 | 314.1459 |
| <a href="#">NAGAA</a> | 357.1881 | 385.1830 | <a href="#">NAGAAL</a> | 470.2722 | 498.2671 | <a href="#">NAGAALI</a> | 583.3562 | 611.3511 |
| <a href="#">AG</a>    | 101.0709 | 129.0659 | <a href="#">AGA</a>    | 172.1081 | 200.1030 | <a href="#">AGAA</a>    | 243.1452 | 271.1401 |
| <a href="#">AGAAL</a> | 356.2292 | 384.2241 | <a href="#">AGAALI</a> | 469.3133 | 497.3082 | <a href="#">GA</a>      | 101.0709 | 129.0659 |
| <a href="#">GAA</a>   | 172.1081 | 200.1030 | <a href="#">GAAL</a>   | 285.1921 | 313.1870 | <a href="#">GAALI</a>   | 398.2762 | 426.2711 |
| <a href="#">AA</a>    | 115.0866 | 143.0815 | <a href="#">AAL</a>    | 228.1707 | 256.1656 | <a href="#">AALI</a>    | 341.2547 | 369.2496 |
| <a href="#">AL</a>    | 157.1335 | 185.1285 | <a href="#">ALI</a>    | 270.2176 | 298.2125 | <a href="#">LI</a>      | 199.1805 | 227.1754 |

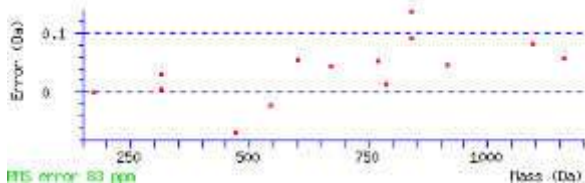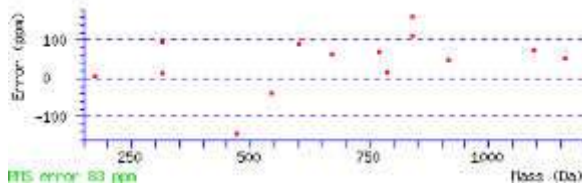

NCBI BLAST search of [AIELYDPMENAGAALIR](#)  
 (Parameters: blastp, nr protein database, expect=20000, no filter, PAM30)  
 Other BLAST [web gateways](#)

All matches to this query

| Score | M <sub>r</sub> (calc) | Delta   | Sequence                             |
|-------|-----------------------|---------|--------------------------------------|
| 33.0  | 1861.9243             | 0.0809  | <a href="#">AIELYDPMENAGAALIR</a>    |
| 15.5  | 1862.0737             | -0.0685 | <a href="#">GAGIIRVDIEPAGAALIAR</a>  |
| 14.2  | 1862.0513             | -0.0460 | <a href="#">VLAEAPAPVTEALEALIR</a>   |
| 13.7  | 1862.0196             | -0.0144 | <a href="#">SOMAAALLTHPAAGAVVVR</a>  |
| 13.4  | 1861.9871             | 0.0181  | <a href="#">SGGPAGGERPGTAPAGRVLK</a> |
| 11.8  | 1861.9356             | 0.0696  | <a href="#">GAKTALENEMPVNGFLR</a>    |
| 11.4  | 1862.0951             | -0.0898 | <a href="#">SSLASIIFILAIIVGMAK</a>   |
| 10.2  | 1862.0486             | -0.0434 | <a href="#">LSGQNAGAAALPAVTLRPR</a>  |
| 10.0  | 1861.8961             | 0.1091  | <a href="#">MMKVSONATSVTHCR</a>      |
| 9.9   | 1861.9641             | 0.0411  | <a href="#">DSAILLTVIMLSACSPR</a>    |

Mascot: <http://www.matrixscience.com/>

**MATRIX SCIENCE Mascot Search Results**

**Peptide View Spot no 90**

MS/MS Fragmentation of **DLGLLVENATEEQ LGTAR**

Found in **gi|115488160** in **NCBI nr**, Os12g0277500 [Oryza sativa Japonica Group]

Match to Query 67: 1928.089624 from(1929.096900,1+) intensity(0.0000) index(23)

Title: Label: D12, Spot\_Id: 219853, Peak\_List\_Id: 227213, MSMS Job\_Run\_Id: 21955, Comment:

Data file C:\Documents and Settings\Administrator\Desktop\Farah-Garima 11May 2013\ppw\_D12\_136868220000.txt

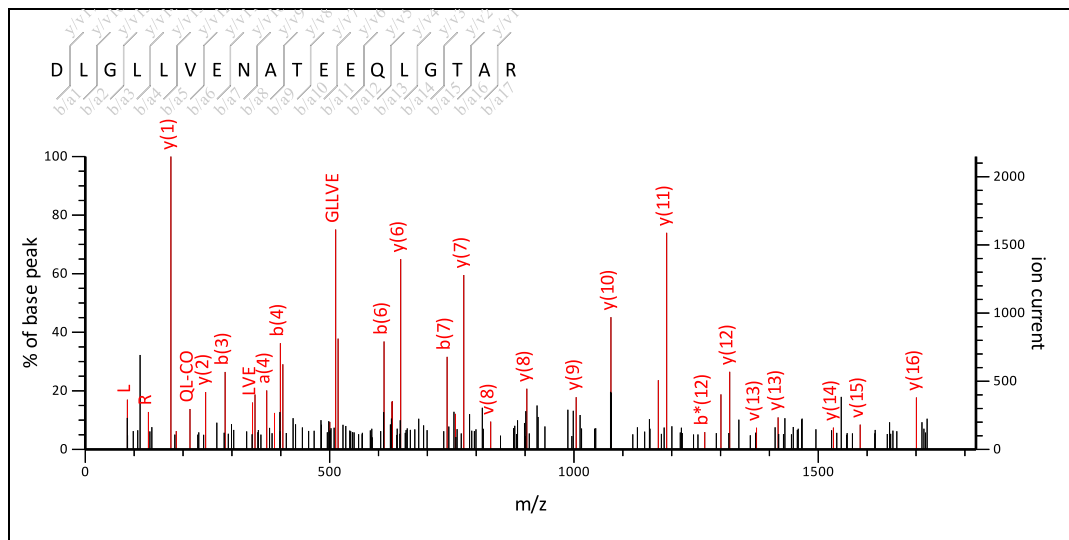

Navigation icons: Home, Back, Forward, Search, Print, Refresh. Search range: 0 to 1822.72.

Label all possible matches  Label matches used for scoring

Monoisotopic mass of neutral peptide Mr(calc): 1927.9851

Fixed modifications: Carbamidomethyl (C) (apply to specified residues or termini only)

Ions Score: 103 Expect: 1e-06

Matches : 48/332 fragment ions using 68 most intense peaks ([help](#))

| #  | Immon.   | a         | a*        | a <sup>0</sup> | b         | b*        | b <sup>0</sup> | d         | d'        | Seq. | v         | w         | w'       | y         | y*        |
|----|----------|-----------|-----------|----------------|-----------|-----------|----------------|-----------|-----------|------|-----------|-----------|----------|-----------|-----------|
| 1  | 88.0393  | 88.0393   |           | 70.0287        | 116.0342  |           | 98.0237        | 44.0495   |           | D    |           |           |          |           |           |
| 2  | 86.0964  | 201.1234  |           | 183.1128       | 229.1183  |           | 211.1077       | 159.0764  |           | L    | 1755.8872 | 1754.8919 |          | 1813.9654 | 1796.9389 |
| 3  | 30.0338  | 258.1448  |           | 240.1343       | 286.1397  |           | 268.1292       |           |           | G    |           |           |          | 1700.8814 | 1683.8548 |
| 4  | 86.0964  | 371.2289  |           | 353.2183       | 399.2238  |           | 381.2132       | 329.1819  |           | L    | 1585.7816 | 1584.7864 |          | 1643.8599 | 1626.8333 |
| 5  | 86.0964  | 484.3130  |           | 466.3024       | 512.3079  |           | 494.2973       | 442.2660  |           | L    | 1472.6976 | 1471.7023 |          | 1530.7758 | 1513.7493 |
| 6  | 72.0808  | 583.3814  |           | 565.3708       | 611.3763  |           | 593.3657       | 569.3657  |           | V    | 1373.6292 | 1386.6496 |          | 1417.6918 | 1400.6652 |
| 7  | 102.0550 | 712.4240  |           | 694.4134       | 740.4189  |           | 722.4083       | 654.4185  |           | E    | 1244.5866 | 1243.5913 |          | 1318.6233 | 1301.5968 |
| 8  | 87.0553  | 826.4669  | 809.4403  | 808.4563       | 854.4618  | 837.4353  | 836.4512       | 783.4611  |           | N    | 1130.5436 | 1129.5484 |          | 1189.5808 | 1172.5542 |
| 9  | 44.0495  | 897.5040  | 880.4775  | 879.4934       | 925.4989  | 908.4724  | 907.4884       |           |           | A    | 1059.5065 |           |          | 1075.5378 | 1058.5113 |
| 10 | 74.0600  | 998.5517  | 981.5251  | 980.5411       | 1026.5466 | 1009.5201 | 1008.5360      | 982.5568  | 984.5360  | T    | 958.4589  | 971.4793  | 973.4585 | 1004.5007 | 987.4742  |
| 11 | 102.0550 | 1127.5943 | 1110.5677 | 1109.5837      | 1155.5892 | 1138.5626 | 1137.5786      | 1069.5888 |           | E    | 829.4163  | 828.4210  |          | 903.4530  | 886.4265  |
| 12 | 102.0550 | 1256.6369 | 1239.6103 | 1238.6263      | 1284.6318 | 1267.6052 | 1266.6212      | 1198.6314 |           | E    | 700.3737  | 699.3784  |          | 774.4104  | 757.3839  |
| 13 | 101.0709 | 1384.6955 | 1367.6689 | 1366.6849      | 1412.6904 | 1395.6638 | 1394.6798      | 1327.6740 |           | Q    | 572.3151  | 571.3198  |          | 645.3679  | 628.3413  |
| 14 | 86.0964  | 1497.7795 | 1480.7530 | 1479.7689      | 1525.7744 | 1508.7479 | 1507.7639      | 1455.7326 |           | L    | 459.2310  | 458.2358  |          | 517.3093  | 500.2827  |
| 15 | 30.0338  | 1554.8010 | 1537.7744 | 1536.7904      | 1582.7959 | 1565.7693 | 1564.7853      |           |           | G    |           |           |          | 404.2252  | 387.1987  |
| 16 | 74.0600  | 1655.8487 | 1638.8221 | 1637.8381      | 1683.8436 | 1666.8170 | 1665.8330      | 1639.8537 | 1641.8330 | T    | 301.1619  | 314.1823  | 316.1615 | 347.2037  | 330.1772  |
| 17 | 44.0495  | 1726.8858 | 1709.8592 | 1708.8752      | 1754.8807 | 1737.8541 | 1736.8701      |           |           | A    | 230.1248  |           |          | 246.1561  | 229.1295  |
| 18 | 129.1135 |           |           |                |           |           |                |           |           | R    | 74.0237   | 73.0284   |          | 175.1190  | 158.0924  |

| Seq   | ya       | yb       | Seq    | ya       | yb       | Seq   | ya       | yb       |
|-------|----------|----------|--------|----------|----------|-------|----------|----------|
| LG    | 143.1179 | 171.1128 | LGL    | 256.2020 | 284.1969 | LGLL  | 369.2860 | 397.2809 |
| LGLLV | 468.3544 | 496.3493 | LGLLVE | 597.3970 | 625.3919 | GL    | 143.1179 | 171.1128 |
| GLL   | 256.2020 | 284.1969 | GLLV   | 355.2704 | 383.2653 | GLLVE | 484.3130 | 512.3079 |

|        |          |          |         |          |          |        |          |          |
|--------|----------|----------|---------|----------|----------|--------|----------|----------|
| GLLVEN | 598.3559 | 626.3508 | GLLVENA | 669.3930 | 697.3879 | LL     | 199.1805 | 227.1754 |
| LLV    | 298.2489 | 326.2438 | LLVE    | 427.2915 | 455.2864 | LLVEN  | 541.3344 | 569.3293 |
| LLVENA | 612.3715 | 640.3665 | LV      | 185.1648 | 213.1598 | LVE    | 314.2074 | 342.2023 |
| LVEN   | 428.2504 | 456.2453 | LVENA   | 499.2875 | 527.2824 | LVENAT | 600.3352 | 628.3301 |
| VE     | 201.1234 | 229.1183 | VEN     | 315.1663 | 343.1612 | VENA   | 386.2034 | 414.1983 |
| VENAT  | 487.2511 | 515.2460 | VENATE  | 616.2937 | 644.2886 | EN     | 216.0979 | 244.0928 |
| ENA    | 287.1350 | 315.1299 | ENAT    | 388.1827 | 416.1776 | ENATE  | 517.2253 | 545.2202 |
| ENATEE | 646.2679 | 674.2628 | NA      | 158.0924 | 186.0873 | NAT    | 259.1401 | 287.1350 |
| NATE   | 388.1827 | 416.1776 | NATEE   | 517.2253 | 545.2202 | NATEEQ | 645.2838 | 673.2788 |
| AT     | 145.0972 | 173.0921 | ATE     | 274.1397 | 302.1347 | ATEE   | 403.1823 | 431.1773 |
| ATEEQ  | 531.2409 | 559.2358 | ATEEQL  | 644.3250 | 672.3199 | TE     | 203.1026 | 231.0975 |
| TEE    | 332.1452 | 360.1401 | TEEQ    | 460.2038 | 488.1987 | TEEQL  | 573.2879 | 601.2828 |
| TEEQLG | 630.3093 | 658.3042 | EE      | 231.0975 | 259.0925 | EEQ    | 359.1561 | 387.1510 |
| EEQL   | 472.2402 | 500.2351 | EEQLG   | 529.2617 | 557.2566 | EEQLGT | 630.3093 | 658.3042 |
| EQ     | 230.1135 | 258.1084 | EQL     | 343.1976 | 371.1925 | EQLG   | 400.2191 | 428.2140 |
| EQLGT  | 501.2667 | 529.2617 | EQLGTA  | 572.3039 | 600.2988 | QL     | 214.1550 | 242.1499 |
| QLG    | 271.1765 | 299.1714 | QLGT    | 372.2241 | 400.2191 | QLGTA  | 443.2613 | 471.2562 |
| LG     | 143.1179 | 171.1128 | LGT     | 244.1656 | 272.1605 | LGTA   | 315.2027 | 343.1976 |
| GT     | 131.0815 | 159.0764 | GTA     | 202.1186 | 230.1135 | TA     | 145.0972 | 173.0921 |

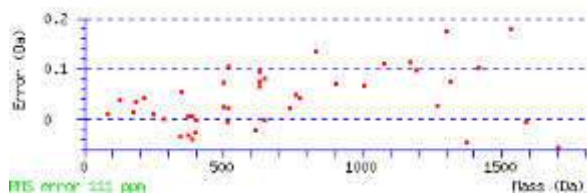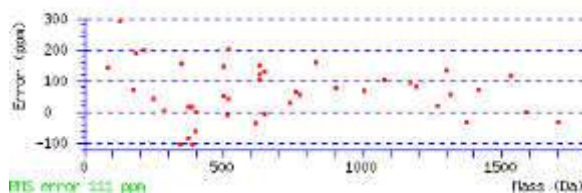

NCBI BLAST search of [DLGLLVENATEEQGTAR](#)

(Parameters: blastp, nr protein database, expect=20000, no filter, PAM30)

Other BLAST [web gateways](#)

#### All matches to this query

| Score | Mr(calcd) | Delta  | Sequence                            |
|-------|-----------|--------|-------------------------------------|
| 103.2 | 1927.9851 | 0.1046 | <a href="#">DLGLLVENATEEQGTAR</a>   |
| 42.6  | 1927.9673 | 0.1223 | <a href="#">DILAVVVCVVGEEGANVR</a>  |
| 29.5  | 1928.0367 | 0.0529 | <a href="#">DIGIHDYLRELOPDR</a>     |
| 26.1  | 1928.0513 | 0.0383 | <a href="#">QGVLMKNOGSLPLSTAR</a>   |
| 25.1  | 1927.9599 | 0.1297 | <a href="#">ILGNNVNTLSEDEOAGVR</a>  |
| 24.7  | 1927.9673 | 0.1223 | <a href="#">AIVDLDTNTVLMDSLHR</a>   |
| 24.2  | 1928.0149 | 0.0747 | <a href="#">ATLIVEDNEANMLAR</a>     |
| 23.7  | 1927.9309 | 0.1587 | <a href="#">LAVDLPADLSCDLGGDAAR</a> |
| 22.9  | 1927.9262 | 0.1634 | <a href="#">DTEIETITATNEVYTK</a>    |
| 22.9  | 1927.9309 | 0.1587 | <a href="#">AAMGYTGSASIEELQTKR</a>  |

Mascot: <http://www.matrixscience.com/>

**MATRIX SCIENCE Mascot Search Results**

**Peptide View Spot no 90**

MS/MS Fragmentation of **ELSETDSIYDTEKLAER**

Found in **gi|115488160** in **NCBI nr**, Os12g0277500 [Oryza sativa Japonica Group]

Match to Query 69: 1998.051924 from(1999.059200,1+) intensity(0.0000) index(24)

Title: Label: D12, Spot\_Id: 219853, Peak\_List\_Id: 227219, MSMS Job\_Run\_Id: 21955, Comment:

Data file C:\Documents and Settings\Administrator\Desktop\Farah-Garima 11May 2013\ppw\_D12\_136868220000.txt

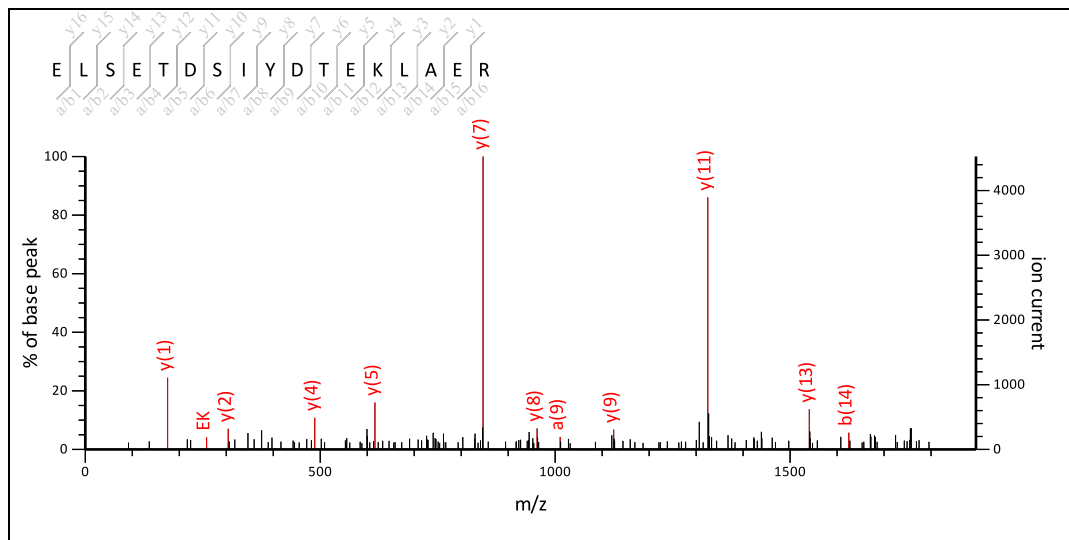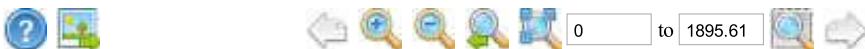

Label all possible matches  Label matches used for scoring

Monoisotopic mass of neutral peptide Mr(calc): 1997.9429

Fixed modifications: Carbamidomethyl (C) (apply to specified residues or termini only)

Ions Score: 58 Expect: 0.042

Matches : 14/300 fragment ions using 18 most intense peaks [\(help\)](#)

| #  | Immon.   | a         | a*        | a <sup>0</sup> | b         | b*        | b <sup>0</sup> | d         | d'        | Seq. | v         | w         | w'        | y         | y*        |
|----|----------|-----------|-----------|----------------|-----------|-----------|----------------|-----------|-----------|------|-----------|-----------|-----------|-----------|-----------|
| 1  | 102.0550 | 102.0550  |           | 84.0444        | 130.0499  |           | 112.0393       | 44.0495   |           | E    |           |           |           |           |           |
| 2  | 86.0964  | 215.1390  |           | 197.1285       | 243.1339  |           | 225.1234       | 173.0921  |           | L    | 1811.8294 | 1810.8341 |           | 1869.9076 | 1852.8811 |
| 3  | 60.0444  | 302.1710  |           | 284.1605       | 330.1660  |           | 312.1554       | 286.1761  |           | S    | 1724.7974 | 1723.8021 |           | 1756.8236 | 1739.7970 |
| 4  | 102.0550 | 431.2136  |           | 413.2031       | 459.2086  |           | 441.1980       | 373.2082  |           | E    | 1595.7548 | 1594.7595 |           | 1669.7915 | 1652.7650 |
| 5  | 74.0600  | 532.2613  |           | 514.2508       | 560.2562  |           | 542.2457       | 516.2664  | 518.2457  | T    | 1494.7071 | 1507.7275 | 1509.7067 | 1540.7489 | 1523.7224 |
| 6  | 88.0393  | 647.2883  |           | 629.2777       | 675.2832  |           | 657.2726       | 603.2984  |           | D    | 1379.6801 | 1378.6849 |           | 1439.7013 | 1422.6747 |
| 7  | 60.0444  | 734.3203  |           | 716.3097       | 762.3152  |           | 744.3046       | 718.3254  |           | S    | 1292.6481 | 1291.6529 |           | 1324.6743 | 1307.6478 |
| 8  | 86.0964  | 847.4044  |           | 829.3938       | 875.3993  |           | 857.3887       | 819.3731  | 833.3887  | I    | 1179.5640 | 1192.5844 | 1206.6001 | 1237.6423 | 1220.6157 |
| 9  | 136.0757 | 1010.4677 |           | 992.4571       | 1038.4626 |           | 1020.4520      |           |           | Y    | 1016.5007 |           |           | 1124.5582 | 1107.5317 |
| 10 | 88.0393  | 1125.4946 |           | 1107.4841      | 1153.4895 |           | 1135.4790      | 1081.5048 |           | D    | 901.4738  | 900.4785  |           | 961.4949  | 944.4684  |
| 11 | 74.0600  | 1226.5423 |           | 1208.5317      | 1254.5372 |           | 1236.5267      | 1210.5474 | 1212.5267 | T    | 800.4261  | 813.4465  | 815.4258  | 846.4680  | 829.4414  |
| 12 | 102.0550 | 1355.5849 |           | 1337.5743      | 1383.5798 |           | 1365.5692      | 1297.5794 |           | E    | 671.3835  | 670.3883  |           | 745.4203  | 728.3937  |
| 13 | 101.1073 | 1483.6799 | 1466.6533 | 1465.6693      | 1511.6748 | 1494.6482 | 1493.6642      | 1426.6220 |           | K    | 543.2885  | 542.2933  |           | 616.3777  | 599.3511  |
| 14 | 86.0964  | 1596.7639 | 1579.7374 | 1578.7534      | 1624.7588 | 1607.7323 | 1606.7483      | 1554.7170 |           | L    | 430.2045  | 429.2092  |           | 488.2827  | 471.2562  |
| 15 | 44.0495  | 1667.8010 | 1650.7745 | 1649.7905      | 1695.7960 | 1678.7694 | 1677.7854      |           |           | A    | 359.1674  |           |           | 375.1987  | 358.1721  |
| 16 | 102.0550 | 1796.8436 | 1779.8171 | 1778.8331      | 1824.8385 | 1807.8120 | 1806.8280      | 1738.8382 |           | E    | 230.1248  | 229.1295  |           | 304.1615  | 287.1350  |
| 17 | 129.1135 |           |           |                |           |           |                |           |           | R    | 74.0237   | 73.0284   |           | 175.1190  | 158.0924  |

| Seq    | ya       | yb       | Seq    | ya       | yb       | Seq   | ya       | yb       |
|--------|----------|----------|--------|----------|----------|-------|----------|----------|
| LS     | 173.1285 | 201.1234 | LSE    | 302.1710 | 330.1660 | LSET  | 403.2187 | 431.2136 |
| LSETD  | 518.2457 | 546.2406 | LSETDS | 605.2777 | 633.2726 | SE    | 189.0870 | 217.0819 |
| SET    | 290.1347 | 318.1296 | SETD   | 405.1616 | 433.1565 | SETDS | 492.1936 | 520.1885 |
| SETDSI | 605.2777 | 633.2726 | ET     | 203.1026 | 231.0975 | ETD   | 318.1296 | 346.1245 |



|        |          |          |        |          |          |        |          |          |
|--------|----------|----------|--------|----------|----------|--------|----------|----------|
| ETDS   | 405.1616 | 433.1565 | ETDSI  | 518.2457 | 546.2406 | ETDSIY | 681.3090 | 709.3039 |
| TD     | 189.0870 | 217.0819 | TDS    | 276.1190 | 304.1139 | TDSI   | 389.2031 | 417.1980 |
| TDSIY  | 552.2664 | 580.2613 | TDSIYD | 667.2933 | 695.2883 | DS     | 175.0713 | 203.0662 |
| DSI    | 288.1554 | 316.1503 | DSIY   | 451.2187 | 479.2136 | DSIYD  | 566.2457 | 594.2406 |
| DSIYDT | 667.2933 | 695.2883 | SI     | 173.1285 | 201.1234 | SIY    | 336.1918 | 364.1867 |
| SIYD   | 451.2187 | 479.2136 | SIYDT  | 552.2664 | 580.2613 | SIYDTE | 681.3090 | 709.3039 |
| IY     | 249.1598 | 277.1547 | IYD    | 364.1867 | 392.1816 | IYDT   | 465.2344 | 493.2293 |
| IYDTE  | 594.2770 | 622.2719 | YD     | 251.1026 | 279.0975 | YDT    | 352.1503 | 380.1452 |
| YDTE   | 481.1929 | 509.1878 | YDTEK  | 609.2879 | 637.2828 | DT     | 189.0870 | 217.0819 |
| DTE    | 318.1296 | 346.1245 | DTEK   | 446.2245 | 474.2195 | DTEKL  | 559.3086 | 587.3035 |
| DTEKLA | 630.3457 | 658.3406 | TE     | 203.1026 | 231.0975 | TEK    | 331.1976 | 359.1925 |
| TEKL   | 444.2817 | 472.2766 | TEKLA  | 515.3188 | 543.3137 | TEKLAE | 644.3614 | 672.3563 |
| EK     | 230.1499 | 258.1448 | EKL    | 343.2340 | 371.2289 | EKLA   | 414.2711 | 442.2660 |
| EKLAE  | 543.3137 | 571.3086 | KL     | 214.1914 | 242.1863 | KLA    | 285.2285 | 313.2234 |
| KLAE   | 414.2711 | 442.2660 | LA     | 157.1335 | 185.1285 | LAE    | 286.1761 | 314.1710 |
| AE     | 173.0921 | 201.0870 |        |          |          |        |          |          |

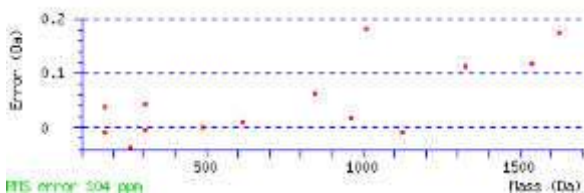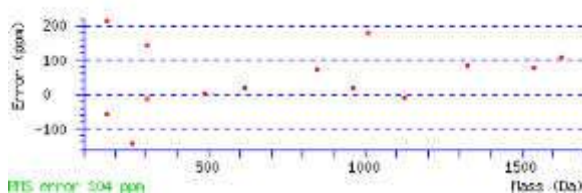

NCBI BLAST search of [ELSETDSIYDTEKLAER](#)

(Parameters: blastp, nr protein database, expect=20000, no filter, PAM30)

Other BLAST [web gateways](#)

#### All matches to this query

| Score | Mr(calc)  | Delta   | Sequence                            |
|-------|-----------|---------|-------------------------------------|
| 57.7  | 1997.9429 | 0.1090  | <a href="#">ELSETDSIYDTEKLAER</a>   |
| 28.5  | 1998.0786 | -0.0266 | <a href="#">KLDIQLFPPTEQIAER</a>    |
| 22.1  | 1997.8744 | 0.1775  | <a href="#">IEMILDCPTDDKMTER</a>    |
| 21.1  | 1998.1837 | -0.1318 | <a href="#">IQSLTIRLLDLVTGTLR</a>   |
| 20.0  | 1998.0105 | 0.0414  | <a href="#">SAHIWISSRDMVQLAER</a>   |
| 18.7  | 1997.8836 | 0.1683  | <a href="#">GLCOGQWHADLNTMPDR</a>   |
| 17.1  | 1997.8791 | 0.1728  | <a href="#">CVACVAKNADNMIETMR</a>   |
| 17.0  | 1998.0323 | 0.0197  | <a href="#">LOEOPWOGAIFAAAALER</a>  |
| 16.9  | 1998.0647 | -0.0127 | <a href="#">AQATALRVAGVDWATIAER</a> |
| 16.9  | 1998.0316 | 0.0203  | <a href="#">LAARAPACNLDLLSDAATR</a> |

Mascot: <http://www.matrixscience.com/>



**MATRIX SCIENCE Mascot Search Results**

**Peptide View Spot no 90**

MS/MS Fragmentation of **ALVAPASLIAHNAGVEGEVVVEK**

Found in **gi|115488160** in **NCBI**, Os12g0277500 [Oryza sativa Japonica Group]

Match to Query 72: 2272.367024 from(2273.374300,1+) intensity(0.0000) index(25)

Title: Label: D12, Spot\_Id: 219853, Peak\_List\_Id: 227230, MSMS Job\_Run\_Id: 21955, Comment:

Data file C:\Documents and Settings\Administrator\Desktop\Farah-Garima 11May 2013\ppw\_D12\_136868220000.txt

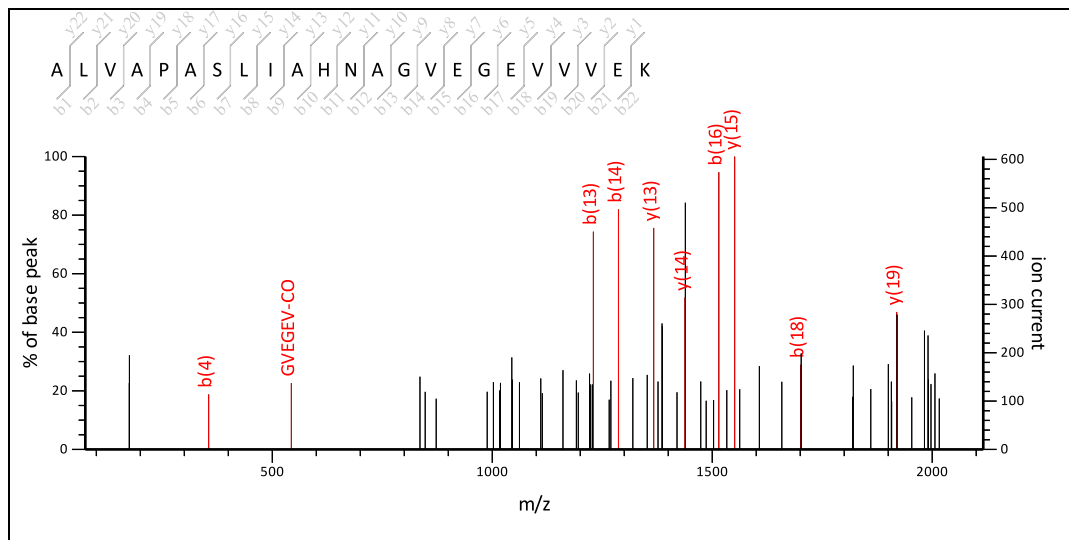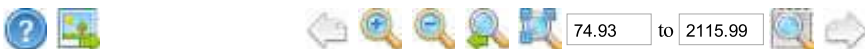

Label all possible matches  Label matches used for scoring

Monoisotopic mass of neutral peptide Mr(calc): 2272.2427

Fixed modifications: Carbamidomethyl (C) (apply to specified residues or termini only)

Ions Score: 18 Expect: 1.8e+02

Matches : 12/444 fragment ions using 28 most intense peaks (help)

| #  | Immon.   | a         | a*        | a <sup>0</sup> | b                | b*        | b <sup>0</sup> | d         | d'       | Seq. | v         | w         | w'        | y                | y*        |
|----|----------|-----------|-----------|----------------|------------------|-----------|----------------|-----------|----------|------|-----------|-----------|-----------|------------------|-----------|
| 1  | 44.0495  | 44.0495   |           |                | 72.0444          |           |                | 44.0495   |          | A    |           |           |           |                  |           |
| 2  | 86.0964  | 157.1335  |           |                | 185.1285         |           |                | 115.0866  |          | L    | 2144.1346 | 2143.1394 |           | 2202.2129        | 2185.1863 |
| 3  | 72.0808  | 256.2020  |           |                | 284.1969         |           |                | 242.1863  |          | V    | 2045.0662 | 2058.0866 |           | 2089.1288        | 2072.1022 |
| 4  | 44.0495  | 327.2391  |           |                | <b>355.2340</b>  |           |                |           |          | A    | 1974.0291 |           |           | 1990.0604        | 1973.0338 |
| 5  | 70.0651  | 424.2918  |           |                | 452.2867         |           |                | 398.2762  |          | P    | 1876.9763 | 1875.9811 |           | <b>1919.0233</b> | 1901.9967 |
| 6  | 44.0495  | 495.3289  |           |                | 523.3239         |           |                |           |          | A    | 1805.9392 |           |           | 1821.9705        | 1804.9440 |
| 7  | 60.0444  | 582.3610  |           | 564.3504       | 610.3559         |           | 592.3453       | 566.3661  |          | S    | 1718.9072 | 1717.9119 |           | 1750.9334        | 1733.9068 |
| 8  | 86.0964  | 695.4450  |           | 677.4345       | 723.4400         |           | 705.4294       | 653.3981  |          | L    | 1605.8231 | 1604.8279 |           | 1663.9014        | 1646.8748 |
| 9  | 86.0964  | 808.5291  |           | 790.5185       | 836.5240         |           | 818.5135       | 780.4978  | 794.5135 | I    | 1492.7390 | 1505.7594 | 1519.7751 | <b>1550.8173</b> | 1533.7907 |
| 10 | 44.0495  | 879.5662  |           | 861.5557       | 907.5611         |           | 889.5506       |           |          | A    | 1421.7019 |           |           | <b>1437.7332</b> | 1420.7067 |
| 11 | 110.0713 | 1016.6251 |           | 998.6146       | 1044.6200        |           | 1026.6095      |           |          | H    | 1284.6430 |           |           | <b>1366.6961</b> | 1349.6696 |
| 12 | 87.0553  | 1130.6681 | 1113.6415 | 1112.6575      | 1158.6630        | 1141.6364 | 1140.6524      | 1087.6622 |          | N    | 1170.6001 | 1169.6048 |           | <b>1229.6372</b> | 1212.6107 |
| 13 | 44.0495  | 1201.7052 | 1184.6786 | 1183.6946      | <b>1229.7001</b> | 1212.6735 | 1211.6895      |           |          | A    | 1099.5630 |           |           | 1115.5943        | 1098.5677 |
| 14 | 30.0338  | 1258.7266 | 1241.7001 | 1240.7161      | <b>1286.7215</b> | 1269.6950 | 1268.7110      |           |          | G    |           |           |           | 1044.5572        | 1027.5306 |
| 15 | 72.0808  | 1357.7950 | 1340.7685 | 1339.7845      | 1385.7900        | 1368.7634 | 1367.7794      | 1343.7794 |          | V    | 943.4731  | 956.4935  |           | 987.5357         | 970.5092  |
| 16 | 102.0550 | 1486.8376 | 1469.8111 | 1468.8271      | <b>1514.8326</b> | 1497.8060 | 1496.8220      | 1428.8322 |          | E    | 814.4305  | 813.4353  |           | 888.4673         | 871.4407  |
| 17 | 30.0338  | 1543.8591 | 1526.8326 | 1525.8485      | 1571.8540        | 1554.8275 | 1553.8435      |           |          | G    |           |           |           | 759.4247         | 742.3981  |
| 18 | 102.0550 | 1672.9017 | 1655.8751 | 1654.8911      | <b>1700.8966</b> | 1683.8701 | 1682.8860      | 1614.8962 |          | E    | 628.3665  | 627.3712  |           | 702.4032         | 685.3767  |
| 19 | 72.0808  | 1771.9701 | 1754.9436 | 1753.9595      | 1799.9650        | 1782.9385 | 1781.9545      | 1757.9545 |          | V    | 529.2980  | 542.3184  |           | 573.3606         | 556.3341  |
| 20 | 72.0808  | 1871.0385 | 1854.0120 | 1853.0280      | 1899.0334        | 1882.0069 | 1881.0229      | 1857.0229 |          | V    | 430.2296  | 443.2500  |           | 474.2922         | 457.2657  |
| 21 | 72.0808  | 1970.1069 | 1953.0804 | 1952.0964      | 1998.1019        | 1981.0753 | 1980.0913      | 1956.0913 |          | V    | 331.1612  | 344.1816  |           | 375.2238         | 358.1973  |
| 22 | 102.0550 | 2099.1495 | 2082.1230 | 2081.1390      | 2127.1444        | 2110.1179 | 2109.1339      | 2041.1441 |          | E    | 202.1186  | 201.1234  |           | 276.1554         | 259.1288  |
| 23 | 101.1073 |           |           |                |                  |           |                |           |          | K    | 74.0237   | 73.0284   |           | 147.1128         | 130.0863  |

| Seq      | ya       | yb       | Seq    | ya       | yb       | Seq     | ya       | yb       |
|----------|----------|----------|--------|----------|----------|---------|----------|----------|
| LV       | 185.1648 | 213.1598 | LVA    | 256.2020 | 284.1969 | LVAP    | 353.2547 | 381.2496 |
| LVAPA    | 424.2918 | 452.2867 | LVAPAS | 511.3239 | 539.3188 | LVAPASL | 624.4079 | 652.4028 |
| VA       | 143.1179 | 171.1128 | VAP    | 240.1707 | 268.1656 | VAPA    | 311.2078 | 339.2027 |
| VAPAS    | 398.2398 | 426.2347 | VAPASL | 511.3239 | 539.3188 | VAPASLI | 624.4079 | 652.4028 |
| VAPASLIA | 695.4450 | 723.4400 | AP     | 141.1022 | 169.0972 | APA     | 212.1394 | 240.1343 |
| APAS     | 299.1714 | 327.1663 | APASL  | 412.2554 | 440.2504 | APASLI  | 525.3395 | 553.3344 |
| APASLIA  | 596.3766 | 624.3715 | PA     | 141.1022 | 169.0972 | PAS     | 228.1343 | 256.1292 |
| PASL     | 341.2183 | 369.2132 | PASLI  | 454.3024 | 482.2973 | PASLIA  | 525.3395 | 553.3344 |
| PASLIAH  | 662.3984 | 690.3933 | AS     | 131.0815 | 159.0764 | ASL     | 244.1656 | 272.1605 |
| ASLI     | 357.2496 | 385.2445 | ASLIA  | 428.2867 | 456.2817 | ASLIAH  | 565.3457 | 593.3406 |
| ASLIAHN  | 679.3886 | 707.3835 | SL     | 173.1285 | 201.1234 | SLI     | 286.2125 | 314.2074 |
| SLIA     | 357.2496 | 385.2445 | SLIAH  | 494.3085 | 522.3035 | SLIAHN  | 608.3515 | 636.3464 |
| SLIAHNA  | 679.3886 | 707.3835 | LI     | 199.1805 | 227.1754 | LIA     | 270.2176 | 298.2125 |
| LIAH     | 407.2765 | 435.2714 | LIAHN  | 521.3194 | 549.3144 | LIAHNA  | 592.3566 | 620.3515 |
| LIAHNAG  | 649.3780 | 677.3729 | IA     | 157.1335 | 185.1285 | IAH     | 294.1925 | 322.1874 |
| IAHN     | 408.2354 | 436.2303 | IAHNA  | 479.2725 | 507.2674 | IAHNAG  | 536.2940 | 564.2889 |
| IAHNAGV  | 635.3624 | 663.3573 | AH     | 181.1084 | 209.1033 | AHN     | 295.1513 | 323.1462 |
| AHNA     | 366.1884 | 394.1833 | AHNAG  | 423.2099 | 451.2048 | AHNAGV  | 522.2783 | 550.2732 |
| AHNAGVE  | 651.3209 | 679.3158 | HN     | 224.1142 | 252.1091 | HNA     | 295.1513 | 323.1462 |
| HNAG     | 352.1728 | 380.1677 | HNAGV  | 451.2412 | 479.2361 | HNAGVE  | 580.2838 | 608.2787 |
| HNAGVEG  | 637.3052 | 665.3002 | NA     | 158.0924 | 186.0873 | NAG     | 215.1139 | 243.1088 |
| NAGV     | 314.1823 | 342.1772 | NAGVE  | 443.2249 | 471.2198 | NAGVEG  | 500.2463 | 528.2413 |
| NAGVEGE  | 629.2889 | 657.2838 | AG     | 101.0709 | 129.0659 | AGV     | 200.1394 | 228.1343 |
| AGVE     | 329.1819 | 357.1769 | AGVEG  | 386.2034 | 414.1983 | AGVEGE  | 515.2460 | 543.2409 |
| AGVEGEV  | 614.3144 | 642.3093 | GV     | 129.1022 | 157.0972 | GVE     | 258.1448 | 286.1397 |
| GVEG     | 315.1663 | 343.1612 | GVEGE  | 444.2089 | 472.2038 | GVEGEV  | 543.2773 | 571.2722 |
| GVEGEVV  | 642.3457 | 670.3406 | VE     | 201.1234 | 229.1183 | VEG     | 258.1448 | 286.1397 |
| VEGE     | 387.1874 | 415.1823 | VEGEV  | 486.2558 | 514.2508 | VEGEVV  | 585.3243 | 613.3192 |
| VEGEVVV  | 684.3927 | 712.3876 | EG     | 159.0764 | 187.0713 | EGE     | 288.1190 | 316.1139 |
| EGEV     | 387.1874 | 415.1823 | EGEVV  | 486.2558 | 514.2508 | EGEVVV  | 585.3243 | 613.3192 |
| GE       | 159.0764 | 187.0713 | GEV    | 258.1448 | 286.1397 | GEVV    | 357.2132 | 385.2082 |
| GEVVV    | 456.2817 | 484.2766 | GEVVVE | 585.3243 | 613.3192 | EV      | 201.1234 | 229.1183 |
| EVV      | 300.1918 | 328.1867 | EVVV   | 399.2602 | 427.2551 | EVVVE   | 528.3028 | 556.2977 |
| VV       | 171.1492 | 199.1441 | VVV    | 270.2176 | 298.2125 | VVVE    | 399.2602 | 427.2551 |
| VV       | 171.1492 | 199.1441 | VVE    | 300.1918 | 328.1867 | VE      | 201.1234 | 229.1183 |

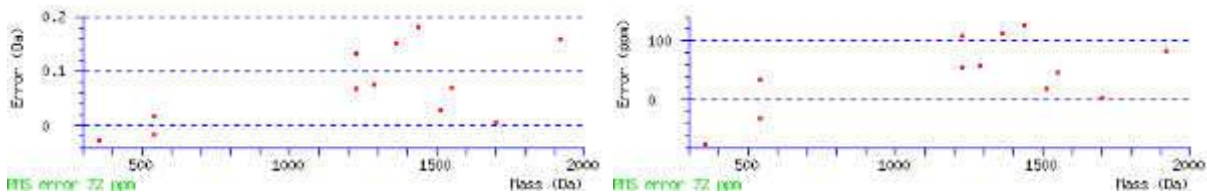

NCBI BLAST search of [ALVAPASLIAHNAGVEGEVVVEK](#)  
 (Parameters: blastp, nr protein database, expect=20000, no filter, PAM30)  
 Other BLAST [web gateways](#)

All matches to this query

| Score | Mr(calc)  | Delta   | Sequence                                |
|-------|-----------|---------|-----------------------------------------|
| 17.8  | 2272.2427 | 0.1243  | <a href="#">ALVAPASLIAHNAGVEGEVVVEK</a> |
| 10.0  | 2272.2501 | 0.1169  | <a href="#">LDLVMVILFKGIPLGSTDGER</a>   |
| 9.6   | 2272.3810 | -0.0140 | <a href="#">LLOVGVLAVLYVGLVLFSSII</a>   |
| 9.6   | 2272.1786 | 0.1884  | <a href="#">GRWLLPTYLEAERPADMVR</a>     |
| 9.3   | 2272.2215 | 0.1455  | <a href="#">SYIANIPDAVLALPKOEFER</a>    |
| 7.8   | 2272.2290 | 0.1381  | <a href="#">QAQFLALAVTYFLSVLMVSR</a>    |

|     |           |        |                                        |
|-----|-----------|--------|----------------------------------------|
| 7.7 | 2272.3195 | 0.0476 | <a href="#">ILQALDYAAAFLVYVALDYR</a>   |
| 7.7 | 2272.2144 | 0.1527 | <a href="#">IVAASVFFYDFLVTVPSEIR</a>   |
| 6.8 | 2272.1569 | 0.2102 | <a href="#">GMPELHGLIPALGSLMDRGHR</a>  |
| 6.4 | 2272.1825 | 0.1845 | <a href="#">TASGGGGGFVPKPVDEHHLVRR</a> |

Mascot: <http://www.matrixscience.com/>



# Mascot Search Results

## Peptide View **Spot no 92**

### MS/MS Fragmentation of **RALSYP LK**

Found in **gi|15231255** in **NCBI**nr, TCP-1/cpn60 chaperonin family protein [Arabidopsis thaliana]

Match to Query 45: 946.585864 from(947.593140,1+) intensity(0.0000) index(5)

Title: Label: E15, Spot\_Id: 219902, Peak\_List\_Id: 228294, MSMS Job\_Run\_Id: 21986, Comment:

Data file C:\Documents and Settings\Administrator\Desktop\Farah-Garima 11May 2013\ppw\_E15\_136868276000.txt

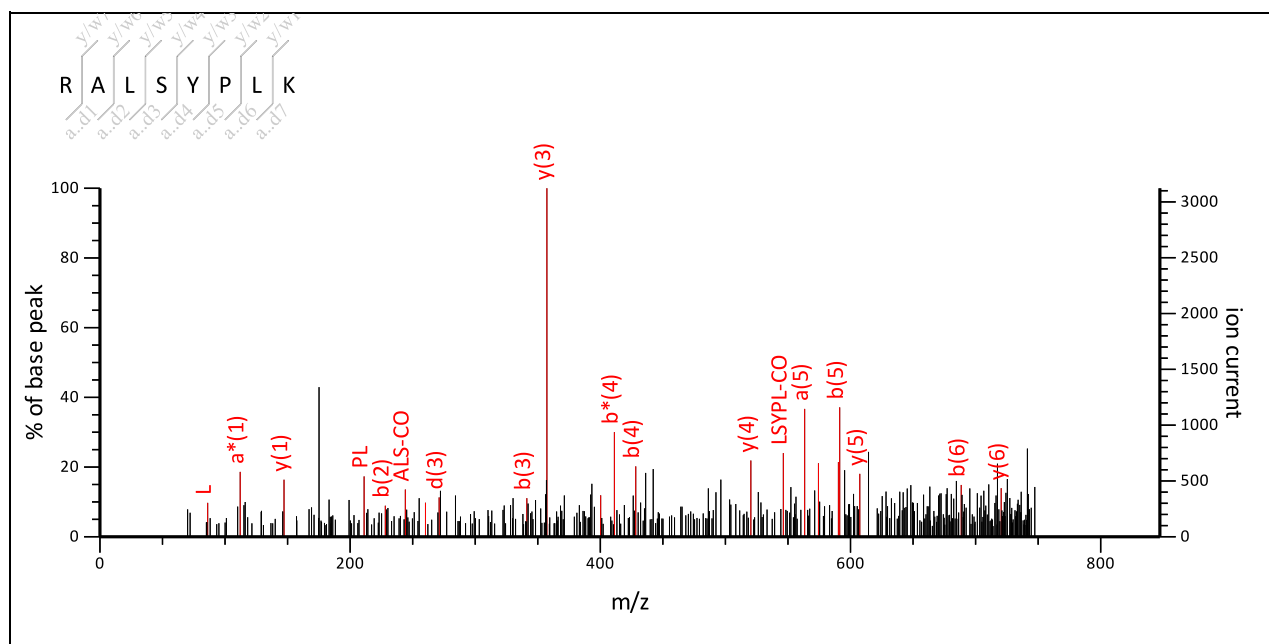

0 to 847.31



Label all possible matches  Label matches used for scoring

**Monoisotopic mass of neutral peptide Mr(calc):** 946.5600

**Fixed modifications:** Carbamidomethyl (C) (apply to specified residues or termini only)

**Ions Score:** 26 **Expect:** 61

**Matches :** 30/108 fragment ions using 56 most intense peaks ([help](#))

| # | Immon.   | a        | a*       | a <sup>0</sup> | b        | b*       | b <sup>0</sup> | d        | Seq. | v        | w        | y        | y*       | y <sup>0</sup> | # |
|---|----------|----------|----------|----------------|----------|----------|----------------|----------|------|----------|----------|----------|----------|----------------|---|
| 1 | 129.1135 | 129.1135 | 112.0869 |                | 157.1084 | 140.0818 |                | 44.0495  | R    |          |          |          |          |                | 8 |
| 2 | 44.0495  | 200.1506 | 183.1240 |                | 228.1455 | 211.1190 |                |          | A    | 775.4349 |          | 791.4662 | 774.4396 | 773.4556       | 7 |
| 3 | 86.0964  | 313.2346 | 296.2081 |                | 341.2296 | 324.2030 |                | 271.1877 | L    | 662.3508 | 661.3556 | 720.4291 | 703.4025 | 702.4185       | 6 |
| 4 | 60.0444  | 400.2667 | 383.2401 | 382.2561       | 428.2616 | 411.2350 | 410.2510       | 384.2718 | S    | 575.3188 | 574.3235 | 607.3450 | 590.3184 | 589.3344       | 5 |
| 5 | 136.0757 | 563.3300 | 546.3035 | 545.3194       | 591.3249 | 574.2984 | 573.3144       |          | Y    | 412.2554 |          | 520.3130 | 503.2864 |                | 4 |
| 6 | 70.0651  | 660.3828 | 643.3562 | 642.3722       | 688.3777 | 671.3511 | 670.3671       | 634.3671 | P    | 315.2027 | 314.2074 | 357.2496 | 340.2231 |                | 3 |
| 7 | 86.0964  | 773.4668 | 756.4403 | 755.4563       | 801.4618 | 784.4352 | 783.4512       | 731.4199 | L    | 202.1186 | 201.1234 | 260.1969 | 243.1703 |                | 2 |
| 8 | 101.1073 |          |          |                |          |          |                |          | K    | 74.0237  | 73.0284  | 147.1128 | 130.0863 |                | 1 |

| Seq   | ya       | yb       | Seq     | ya       | yb       | Seq   | ya       | yb       |
|-------|----------|----------|---------|----------|----------|-------|----------|----------|
| AL    | 157.1335 | 185.1285 | ALS     | 244.1656 | 272.1605 | ALSY  | 407.2289 | 435.2238 |
| ALSYP | 504.2817 | 532.2766 | ALSYP L | 617.3657 | 645.3606 | LS    | 173.1285 | 201.1234 |
| LSY   | 336.1918 | 364.1867 | LSYP    | 433.2445 | 461.2395 | LSYPL | 546.3286 | 574.3235 |
| SY    | 223.1077 | 251.1026 | SYPL    | 320.1605 | 348.1554 | SYPL  | 433.2445 | 461.2395 |

|    |          |          |     |          |          |    |          |          |
|----|----------|----------|-----|----------|----------|----|----------|----------|
| YP | 233.1285 | 261.1234 | YPL | 346.2125 | 374.2074 | PL | 183.1492 | 211.1441 |
|----|----------|----------|-----|----------|----------|----|----------|----------|

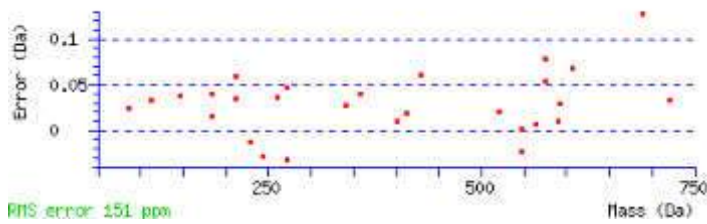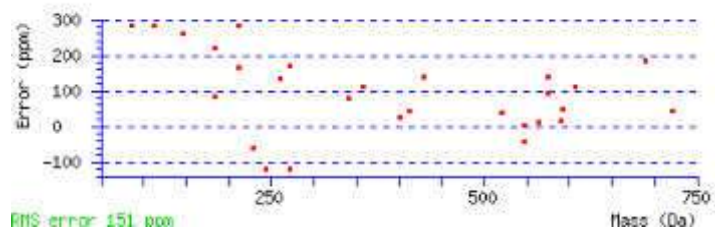

NCBI **BLAST** search of [RALSYPK](#)

(Parameters: blastp, nr protein database, expect=20000, no filter, PAM30)

Other BLAST [web gateways](#)

#### All matches to this query

| Score | Mr(calc) | Delta  | Sequence                  |
|-------|----------|--------|---------------------------|
| 27.0  | 946.5487 | 0.0371 | <a href="#">KLDAYLPK</a>  |
| 27.0  | 946.5124 | 0.0735 | <a href="#">QLDAYIPK</a>  |
| 26.7  | 946.4946 | 0.0913 | <a href="#">QMPAYIPK</a>  |
| 26.4  | 946.5487 | 0.0371 | <a href="#">DLKYALPK</a>  |
| 26.0  | 946.5600 | 0.0259 | <a href="#">RALSYPK</a>   |
| 26.0  | 946.5600 | 0.0259 | <a href="#">RALSYPK</a>   |
| 25.5  | 946.5236 | 0.0623 | <a href="#">REAAYLPK</a>  |
| 25.3  | 946.5236 | 0.0623 | <a href="#">NGGKAYLPK</a> |
| 25.1  | 946.5851 | 0.0007 | <a href="#">KVLSYLPK</a>  |
| 25.1  | 946.5487 | 0.0371 | <a href="#">INISYIPK</a>  |

Mascot: <http://www.matrixscience.com/>


**Mascot Search Results**
**Peptide View Spot no 92**
MS/MS Fragmentation of **IVNDGVTVAR**Found in **gi15231255** in **NCBI**nr, TCP-1/cpn60 chaperonin family protein [Arabidopsis thaliana]

Match to Query 97: 1042.616524 from(1043.623800,1+) intensity(0.0000) index(9)

Title: Label: E15, Spot\_Id: 219902, Peak\_List\_Id: 228297, MSMS Job\_Run\_Id: 21986, Comment:

Data file C:\Documents and Settings\Administrator\Desktop\Farah-Garima 11May 2013\ppw\_E15\_136868276000.txt

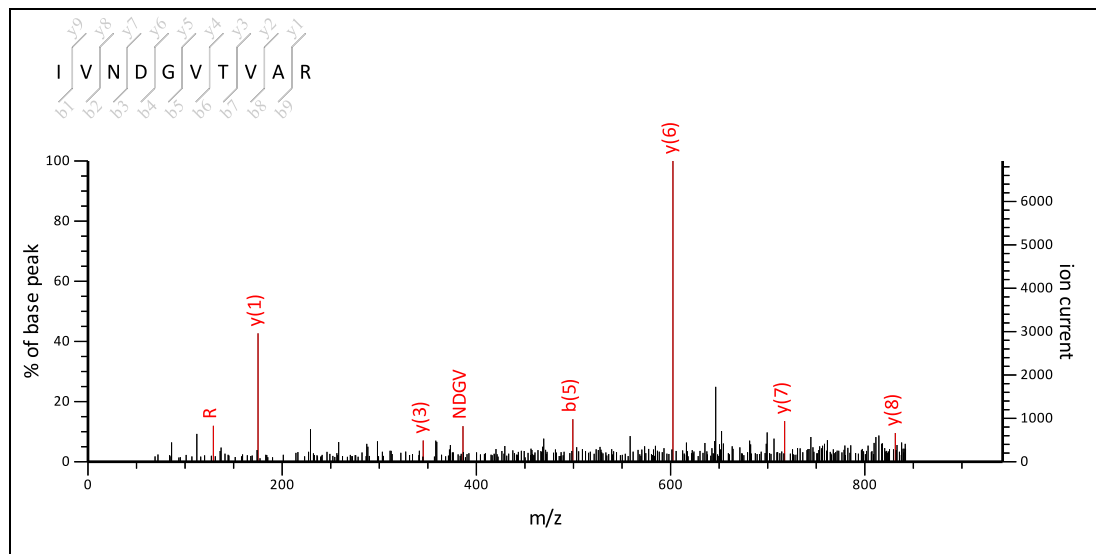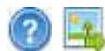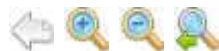

0 to 941.95

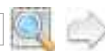Label all possible matches  Label matches used for scoring 

Monoisotopic mass of neutral peptide Mr(calc): 1042.5771

Fixed modifications: Carbamidomethyl (C) (apply to specified residues or termini only)

Ions Score: 49 Expect: 0.44

Matches : 11/156 fragment ions using 8 most intense peaks ([help](#))

| #  | Immon.   | a        | a*       | a <sup>0</sup> | b        | b*       | b <sup>0</sup> | d        | d'       | Seq. | v        | w        | w'       | y        | y*       | y <sup>0</sup> | #  |
|----|----------|----------|----------|----------------|----------|----------|----------------|----------|----------|------|----------|----------|----------|----------|----------|----------------|----|
| 1  | 86.0964  | 86.0964  |          |                | 114.0913 |          |                | 44.0495  |          | I    |          |          |          |          |          |                | 10 |
| 2  | 72.0808  | 185.1648 |          |                | 213.1598 |          |                | 171.1492 |          | V    | 886.4377 | 899.4581 |          | 930.5003 | 913.4738 | 912.4898       | 9  |
| 3  | 87.0553  | 299.2078 | 282.1812 |                | 327.2027 | 310.1761 |                | 256.2020 |          | N    | 772.3948 | 771.3995 |          | 831.4319 | 814.4054 | 813.4213       | 8  |
| 4  | 88.0393  | 414.2347 | 397.2082 | 396.2241       | 442.2296 | 425.2031 | 424.2191       | 370.2449 |          | D    | 657.3679 | 656.3726 |          | 717.3890 | 700.3624 | 699.3784       | 7  |
| 5  | 30.0338  | 471.2562 | 454.2296 | 453.2456       | 499.2511 | 482.2245 | 481.2405       |          |          | G    |          |          |          | 602.3620 | 585.3355 | 584.3515       | 6  |
| 6  | 72.0808  | 570.3246 | 553.2980 | 552.3140       | 598.3195 | 581.2930 | 580.3089       | 556.3089 |          | V    | 501.2780 | 514.2984 |          | 545.3406 | 528.3140 | 527.3300       | 5  |
| 7  | 74.0600  | 671.3723 | 654.3457 | 653.3617       | 699.3672 | 682.3406 | 681.3566       | 655.3774 | 657.3566 | T    | 400.2303 | 413.2507 | 415.2300 | 446.2722 | 429.2456 | 428.2616       | 4  |
| 8  | 72.0808  | 770.4407 | 753.4141 | 752.4301       | 798.4356 | 781.4090 | 780.4250       | 756.4250 |          | V    | 301.1619 | 314.1823 |          | 345.2245 | 328.1979 |                | 3  |
| 9  | 44.0495  | 841.4778 | 824.4512 | 823.4672       | 869.4727 | 852.4462 | 851.4621       |          |          | A    | 230.1248 |          |          | 246.1561 | 229.1295 |                | 2  |
| 10 | 129.1135 |          |          |                |          |          |                |          |          | R    | 74.0237  | 73.0284  |          | 175.1190 | 158.0924 |                | 1  |

| Seq   | ya       | yb       | Seq    | ya       | yb       | Seq     | ya       | yb       |
|-------|----------|----------|--------|----------|----------|---------|----------|----------|
| VN    | 186.1237 | 214.1186 | VND    | 301.1506 | 329.1456 | VNDG    | 358.1721 | 386.1670 |
| VNDGV | 457.2405 | 485.2354 | VNDGVT | 558.2882 | 586.2831 | VNDGVTV | 657.3566 | 685.3515 |
| ND    | 202.0822 | 230.0771 | NDG    | 259.1037 | 287.0986 | NDGV    | 358.1721 | 386.1670 |
| NDGVT | 459.2198 | 487.2147 | NDGVTV | 558.2882 | 586.2831 | NDGVTVA | 629.3253 | 657.3202 |
| DG    | 145.0608 | 173.0557 | DGV    | 244.1292 | 272.1241 | DGVT    | 345.1769 | 373.1718 |
| DGVTV | 444.2453 | 472.2402 | DGVTVA | 515.2824 | 543.2773 | GV      | 129.1022 | 157.0972 |
| GVT   | 230.1499 | 258.1448 | GVTV   | 329.2183 | 357.2132 | GVTVA   | 400.2554 | 428.2504 |
| VT    | 173.1285 | 201.1234 | VTV    | 272.1969 | 300.1918 | VTVA    | 343.2340 | 371.2289 |
| TV    | 173.1285 | 201.1234 | TVA    | 244.1656 | 272.1605 | VA      | 143.1179 | 171.1128 |

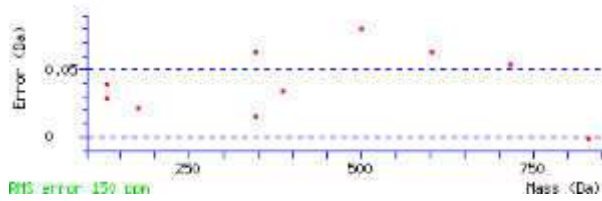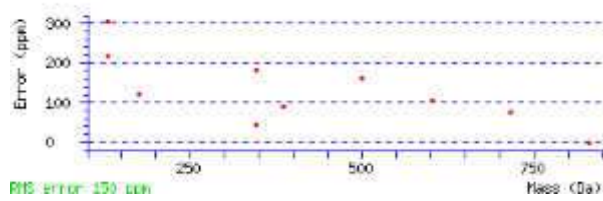

NCBI **BLAST** search of [IVNDGVTVAR](#)

(Parameters: blastp, nr protein database, expect=20000, no filter, PAM30)

Other BLAST [web gateways](#)

**All matches to this query**

| Score | Mr(calcd) | Delta  | Sequence                   |
|-------|-----------|--------|----------------------------|
| 48.9  | 1042.5771 | 0.0394 | <a href="#">IVNDGVTVAR</a> |
| 32.2  | 1042.5407 | 0.0758 | <a href="#">VLNADGELGR</a> |
| 31.8  | 1042.5883 | 0.0282 | <a href="#">IVNDGTRLR</a>  |
| 31.8  | 1042.5407 | 0.0758 | <a href="#">LVNDGLEQR</a>  |
| 31.8  | 1042.5407 | 0.0758 | <a href="#">LVNDINAER</a>  |
| 31.8  | 1042.5883 | 0.0282 | <a href="#">VLNDAISR</a>   |
| 31.8  | 1042.5883 | 0.0282 | <a href="#">VLNDALSRR</a>  |
| 31.7  | 1042.5771 | 0.0394 | <a href="#">LVASAOEGLR</a> |
| 31.7  | 1042.5771 | 0.0394 | <a href="#">LVSAAEQGR</a>  |
| 31.7  | 1042.6135 | 0.0030 | <a href="#">LVTKQEIGR</a>  |

Mascot: <http://www.matrixscience.com/>




**Mascot Search Results**
**Peptide View** Spot no 92
MS/MS Fragmentation of **LADLVGVTLGPK**Found in **gi15231255** in **NCBI nr**, TCP-1/cpn60 chaperonin family protein [Arabidopsis thaliana]

Match to Query 157: 1181.733724 from(1182.741000,1+) intensity(0.0000) index(13)

Title: Label: E15, Spot\_Id: 219902, Peak\_List\_Id: 228292, MSMS Job\_Run\_Id: 21986, Comment:

Data file C:\Documents and Settings\Administrator\Desktop\Farah-Garima 11May 2013\ppw\_E15\_136868276000.txt

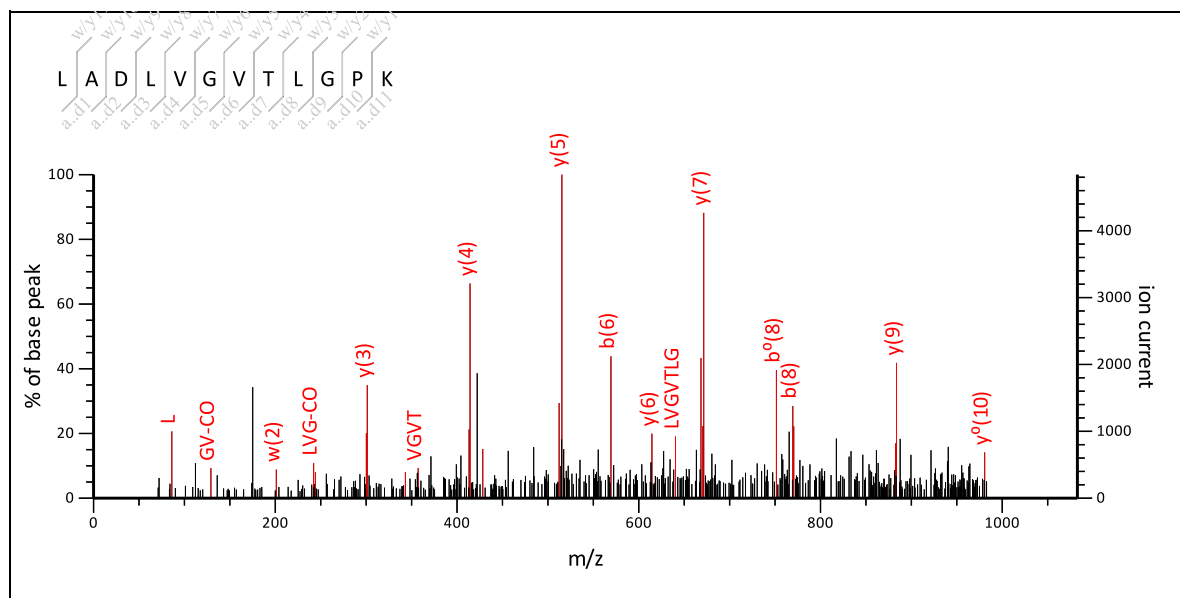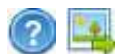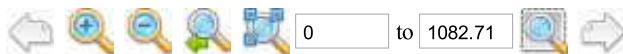Label all possible matches  Label matches used for scoring 

Monoisotopic mass of neutral peptide Mr(calc): 1181.7020

Fixed modifications: Carbamidomethyl (C) (apply to specified residues or termini only)

Ions Score: 55 Expect: 0.049

Matches : 40/186 fragment ions using 40 most intense peaks ([help](#))

| #  | Immon.   | a         | a <sup>0</sup> | b         | b <sup>0</sup> | d        | d'       | Seq. | v         | w        | w'       | y         | y*        | y <sup>0</sup> | #  |
|----|----------|-----------|----------------|-----------|----------------|----------|----------|------|-----------|----------|----------|-----------|-----------|----------------|----|
| 1  | 86.0964  | 86.0964   |                | 114.0913  |                | 44.0495  |          | L    |           |          |          |           |           |                | 12 |
| 2  | 44.0495  | 157.1335  |                | 185.1285  |                |          |          | A    | 1053.5939 |          |          | 1069.6252 | 1052.5986 | 1051.6146      | 11 |
| 3  | 88.0393  | 272.1605  | 254.1499       | 300.1554  | 282.1448       | 228.1707 |          | D    | 938.5669  | 937.5717 |          | 998.5881  | 981.5615  | 980.5775       | 10 |
| 4  | 86.0964  | 385.2445  | 367.2340       | 413.2395  | 395.2289       | 343.1976 |          | L    | 825.4829  | 824.4876 |          | 883.5611  | 866.5346  | 865.5506       | 9  |
| 5  | 72.0808  | 484.3130  | 466.3024       | 512.3079  | 494.2973       | 470.2973 |          | V    | 726.4145  | 739.4349 |          | 770.4771  | 753.4505  | 752.4665       | 8  |
| 6  | 30.0338  | 541.3344  | 523.3239       | 569.3293  | 551.3188       |          |          | G    |           |          |          | 671.4087  | 654.3821  | 653.3981       | 7  |
| 7  | 72.0808  | 640.4028  | 622.3923       | 668.3978  | 650.3872       | 626.3872 |          | V    | 570.3246  | 583.3450 |          | 614.3872  | 597.3606  | 596.3766       | 6  |
| 8  | 74.0600  | 741.4505  | 723.4400       | 769.4454  | 751.4349       | 725.4556 | 727.4349 | T    | 469.2769  | 482.2973 | 484.2766 | 515.3188  | 498.2922  | 497.3082       | 5  |
| 9  | 86.0964  | 854.5346  | 836.5240       | 882.5295  | 864.5189       | 812.4876 |          | L    | 356.1928  | 355.1976 |          | 414.2711  | 397.2445  |                | 4  |
| 10 | 30.0338  | 911.5560  | 893.5455       | 939.5510  | 921.5404       |          |          | G    |           |          |          | 301.1870  | 284.1605  |                | 3  |
| 11 | 70.0651  | 1008.6088 | 990.5982       | 1036.6037 | 1018.5932      | 982.5932 |          | P    | 202.1186  | 201.1234 |          | 244.1656  | 227.1390  |                | 2  |
| 12 | 101.1073 |           |                |           |                |          |          | K    | 74.0237   | 73.0284  |          | 147.1128  | 130.0863  |                | 1  |

| Seq   | ya       | yb       | Seq     | ya       | yb       | Seq     | ya       | yb       |
|-------|----------|----------|---------|----------|----------|---------|----------|----------|
| AD    | 159.0764 | 187.0713 | ADL     | 272.1605 | 300.1554 | ADLV    | 371.2289 | 399.2238 |
| ADLVG | 428.2504 | 456.2453 | ADLVGV  | 527.3188 | 555.3137 | ADLVGVT | 628.3665 | 656.3614 |
| DL    | 201.1234 | 229.1183 | DLV     | 300.1918 | 328.1867 | DLVG    | 357.2132 | 385.2082 |
| DLVGV | 456.2817 | 484.2766 | DLVGVTL | 557.3293 | 585.3243 | DLVGVTL | 670.4134 | 698.4083 |

|              |          |          |               |          |          |                |          |          |
|--------------|----------|----------|---------------|----------|----------|----------------|----------|----------|
| <b>LV</b>    | 185.1648 | 213.1598 | <b>LVG</b>    | 242.1863 | 270.1812 | <b>LVG</b>     | 341.2547 | 369.2496 |
| <b>LVGVT</b> | 442.3024 | 470.2973 | <b>LVGVTL</b> | 555.3865 | 583.3814 | <b>LVGVTLG</b> | 612.4079 | 640.4028 |
| <b>VG</b>    | 129.1022 | 157.0972 | <b>VG</b>     | 228.1707 | 256.1656 | <b>VGVT</b>    | 329.2183 | 357.2132 |
| <b>VGVTL</b> | 442.3024 | 470.2973 | <b>VGVTLG</b> | 499.3239 | 527.3188 | <b>VGVTLGP</b> | 596.3766 | 624.3715 |
| <b>GV</b>    | 129.1022 | 157.0972 | <b>GVT</b>    | 230.1499 | 258.1448 | <b>GVTL</b>    | 343.2340 | 371.2289 |
| <b>GVTLG</b> | 400.2554 | 428.2504 | <b>GVTLGP</b> | 497.3082 | 525.3031 | <b>VT</b>      | 173.1285 | 201.1234 |
| <b>VTL</b>   | 286.2125 | 314.2074 | <b>VTLG</b>   | 343.2340 | 371.2289 | <b>VTLGP</b>   | 440.2867 | 468.2817 |
| <b>TL</b>    | 187.1441 | 215.1390 | <b>TLG</b>    | 244.1656 | 272.1605 | <b>TLGP</b>    | 341.2183 | 369.2132 |
| <b>LG</b>    | 143.1179 | 171.1128 | <b>LGP</b>    | 240.1707 | 268.1656 | <b>GP</b>      | 127.0866 | 155.0815 |

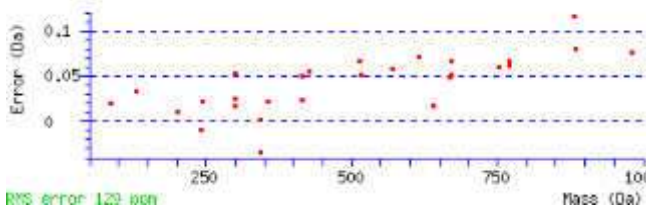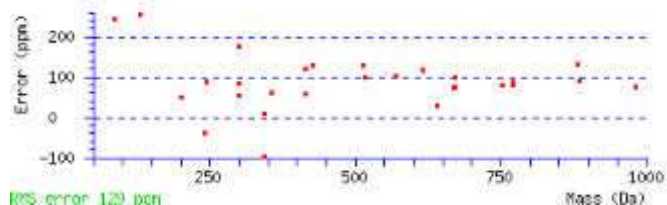

NCBI **BLAST** search of [LADLVGVTLGPK](#)

(Parameters: blastp, nr protein database, expect=20000, no filter, PAM30)

Other BLAST [web gateways](#)

#### All matches to this query

| Score | Mr(calc)  | Delta  | Sequence                     |
|-------|-----------|--------|------------------------------|
| 54.7  | 1181.7020 | 0.0317 | <a href="#">LADLVGVTLGPK</a> |
| 46.5  | 1181.7244 | 0.0093 | <a href="#">LVATASRVLPR</a>  |
| 45.2  | 1181.7244 | 0.0093 | <a href="#">LSQLTRPVIR</a>   |
| 45.1  | 1181.6768 | 0.0569 | <a href="#">QITAEVGLVLR</a>  |
| 44.1  | 1181.6768 | 0.0569 | <a href="#">VGLDVLSINPR</a>  |
| 43.9  | 1181.7132 | 0.0205 | <a href="#">IASGLTGVPPIR</a> |
| 43.4  | 1181.6404 | 0.0933 | <a href="#">LDVAGLVENPR</a>  |
| 38.1  | 1181.6880 | 0.0457 | <a href="#">DLVQSVRIPIR</a>  |
| 37.9  | 1181.6517 | 0.0821 | <a href="#">AVISATRDPPR</a>  |
| 37.9  | 1181.6516 | 0.0821 | <a href="#">IANDERLVPR</a>   |

Mascot: <http://www.matrixscience.com/>

**MATRIX SCIENCE Mascot Search Results**

**Peptide View Spot no 92**

MS/MS Fragmentation of **IAALKAPGFGER**

Found in **gji15231255** in **NCBI**nr, TCP-1/cpn60 chaperonin family protein [Arabidopsis thaliana]

Match to Query 179: 1228.734624 from(1229.741900,1+) intensity(0.0000) index(15)

Title: Label: E15, Spot\_Id: 219902, Peak\_List\_Id: 228286, MSMS Job\_Run\_Id: 21986, Comment:

Data file C:\Documents and Settings\Administrator\Desktop\Farah-Garima 11May 2013\ppw\_E15\_136868276000.txt

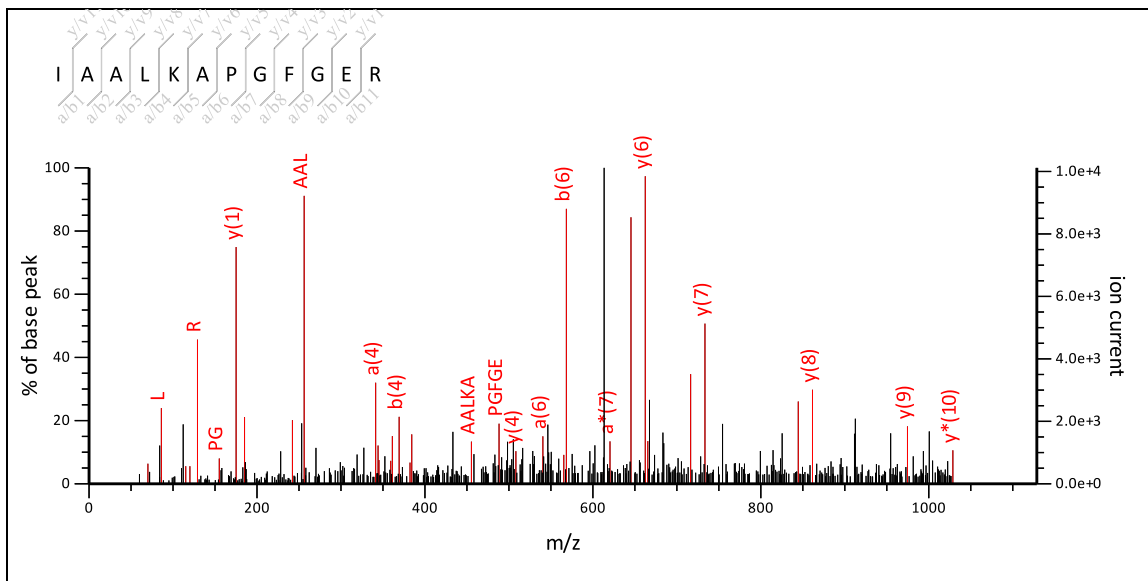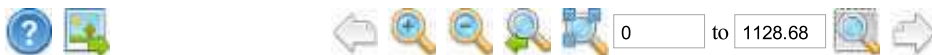

Label all possible matches  Label matches used for scoring

**Monoisotopic mass of neutral peptide Mr(calc):** 1228.6928

**Fixed modifications:** Carbamidomethyl (C) (apply to specified residues or termini only)

**Ions Score:** 35 **Expect:** 8.8

**Matches :** 42/179 fragment ions using 80 most intense peaks ([help](#))

| #  | Immon.   | a         | a*        | a <sup>0</sup> | b         | b*        | b <sup>0</sup> | d        | Seq. | v         | w        | y         | y*        | y <sup>0</sup> | #  |
|----|----------|-----------|-----------|----------------|-----------|-----------|----------------|----------|------|-----------|----------|-----------|-----------|----------------|----|
| 1  | 86.0964  | 86.0964   |           |                | 114.0913  |           |                | 44.0495  | I    |           |          |           |           |                | 12 |
| 2  | 44.0495  | 157.1335  |           |                | 185.1285  |           |                |          | A    | 1100.5847 |          | 1116.6160 | 1099.5895 | 1098.6055      | 11 |
| 3  | 44.0495  | 228.1707  |           |                | 256.1656  |           |                |          | A    | 1029.5476 |          | 1045.5789 | 1028.5524 | 1027.5683      | 10 |
| 4  | 86.0964  | 341.2547  |           |                | 369.2496  |           |                | 299.2078 | L    | 916.4635  | 915.4683 | 974.5418  | 957.5152  | 956.5312       | 9  |
| 5  | 101.1073 | 469.3497  | 452.3231  |                | 497.3446  | 480.3180  |                | 412.2918 | K    | 788.3686  | 787.3733 | 861.4577  | 844.4312  | 843.4472       | 8  |
| 6  | 44.0495  | 540.3868  | 523.3602  |                | 568.3817  | 551.3552  |                |          | A    | 717.3315  |          | 733.3628  | 716.3362  | 715.3522       | 7  |
| 7  | 70.0651  | 637.4396  | 620.4130  |                | 665.4345  | 648.4079  |                | 611.4239 | P    | 620.2787  | 619.2835 | 662.3257  | 645.2991  | 644.3151       | 6  |
| 8  | 30.0338  | 694.4610  | 677.4345  |                | 722.4559  | 705.4294  |                |          | G    |           |          | 565.2729  | 548.2463  | 547.2623       | 5  |
| 9  | 120.0808 | 841.5294  | 824.5029  |                | 869.5244  | 852.4978  |                |          | F    | 416.1888  |          | 508.2514  | 491.2249  | 490.2409       | 4  |
| 10 | 30.0338  | 898.5509  | 881.5244  |                | 926.5458  | 909.5193  |                |          | G    |           |          | 361.1830  | 344.1565  | 343.1724       | 3  |
| 11 | 102.0550 | 1027.5935 | 1010.5669 | 1009.5829      | 1055.5884 | 1038.5619 | 1037.5778      | 969.5880 | E    | 230.1248  | 229.1295 | 304.1615  | 287.1350  | 286.1510       | 2  |
| 12 | 129.1135 |           |           |                |           |           |                |          | R    | 74.0237   | 73.0284  | 175.1190  | 158.0924  |                | 1  |

| Seq   | ya       | yb       | Seq    | ya       | yb       | Seq     | ya       | yb       |
|-------|----------|----------|--------|----------|----------|---------|----------|----------|
| AA    | 115.0866 | 143.0815 | AAL    | 228.1707 | 256.1656 | AALK    | 356.2656 | 384.2605 |
| AALKA | 427.3027 | 455.2976 | AALKAP | 524.3555 | 552.3504 | AALKAPG | 581.3770 | 609.3719 |
| AL    | 157.1335 | 185.1285 | ALK    | 285.2285 | 313.2234 | ALKA    | 356.2656 | 384.2605 |
| ALKAP | 453.3184 | 481.3133 | ALKAPG | 510.3398 | 538.3348 | ALKAPGF | 657.4083 | 685.4032 |
| LK    | 214.1914 | 242.1863 | LKA    | 285.2285 | 313.2234 | LKAP    | 382.2813 | 410.2762 |

|       |          |          |        |          |          |         |          |          |
|-------|----------|----------|--------|----------|----------|---------|----------|----------|
| LKAPG | 439.3027 | 467.2976 | LKAPGF | 586.3711 | 614.3661 | LKAPGFG | 643.3926 | 671.3875 |
| KA    | 172.1444 | 200.1394 | KAP    | 269.1972 | 297.1921 | KAPG    | 326.2187 | 354.2136 |
| KAPGF | 473.2871 | 501.2820 | KAPGFG | 530.3085 | 558.3035 | KAPGFGE | 659.3511 | 687.3461 |
| AP    | 141.1022 | 169.0972 | APG    | 198.1237 | 226.1186 | APGF    | 345.1921 | 373.1870 |
| APGFG | 402.2136 | 430.2085 | APGFGE | 531.2562 | 559.2511 | PG      | 127.0866 | 155.0815 |
| PGF   | 274.1550 | 302.1499 | PGFG   | 331.1765 | 359.1714 | PGFGE   | 460.2191 | 488.2140 |
| GF    | 177.1022 | 205.0972 | GFG    | 234.1237 | 262.1186 | GFGE    | 363.1663 | 391.1612 |
| FG    | 177.1022 | 205.0972 | FGE    | 306.1448 | 334.1397 | GE      | 159.0764 | 187.0713 |

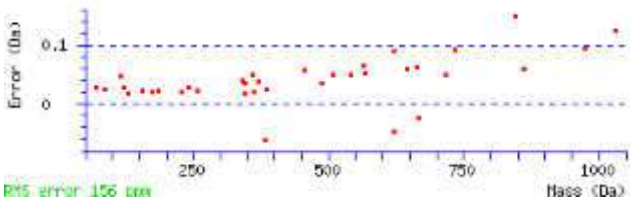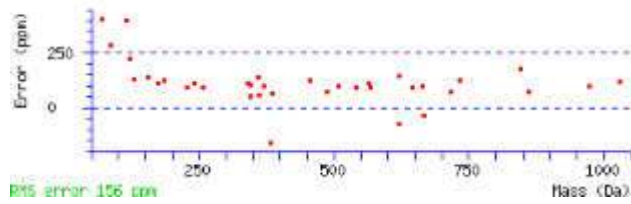

NCBI BLAST search of [IAALKAPGFGER](#)  
 (Parameters: blastp, nr protein database, expect=20000, no filter, PAM30)  
 Other BLAST [web gateways](#)

All matches to this query

| Score | Mr(calc)  | Delta  | Sequence                      |
|-------|-----------|--------|-------------------------------|
| 36.6  | 1228.6928 | 0.0418 | <a href="#">GPTAKIPFAATR</a>  |
| 35.8  | 1228.6928 | 0.0418 | <a href="#">IAAIKAPGFGER</a>  |
| 35.4  | 1228.6775 | 0.0571 | <a href="#">AGIVNIVSATER</a>  |
| 35.0  | 1228.6928 | 0.0418 | <a href="#">IAALKAPGFGER</a>  |
| 34.6  | 1228.6663 | 0.0683 | <a href="#">VGLVNIGEEATK</a>  |
| 32.1  | 1228.6775 | 0.0571 | <a href="#">ALALAGASTLDAR</a> |
| 31.3  | 1228.7325 | 0.0021 | <a href="#">IAAIKIGMLGSR</a>  |
| 29.8  | 1228.6775 | 0.0571 | <a href="#">LAAQLAESGITR</a>  |
| 29.7  | 1228.6710 | 0.0636 | <a href="#">TGPAGLIGRMTR</a>  |
| 29.6  | 1228.6775 | 0.0571 | <a href="#">ALAKALDADSVR</a>  |

Mascot: <http://www.matrixscience.com/>


**Mascot Search Results**
**Peptide View** Spot no 92
MS/MS Fragmentation of **GYISPYFVTDSEK**Found in **gi15231255** in **NCBI**nr, TCP-1/cpn60 chaperonin family protein [Arabidopsis thaliana]

Match to Query 256: 1504.756124 from(1505.763400,1+) intensity(0.0000) index(24)

Title: Label: E15, Spot\_Id: 219902, Peak\_List\_Id: 228296, MSMS Job\_Run\_Id: 21986, Comment:

Data file C:\Documents and Settings\Administrator\Desktop\Farah-Garima 11May 2013\ppw\_E15\_13686276000.txt

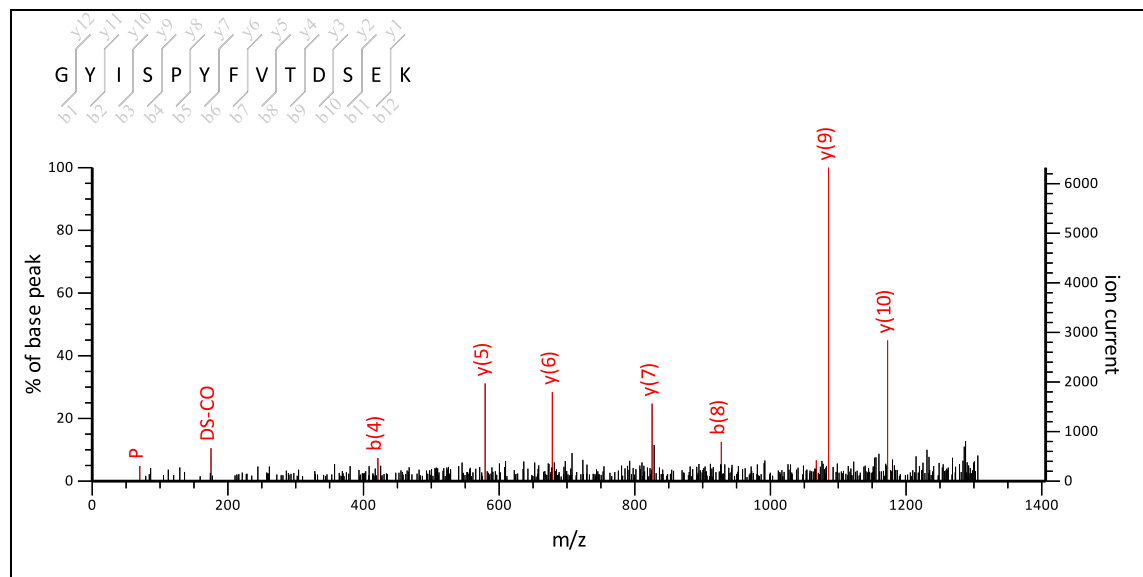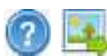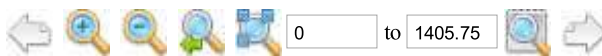Label all possible matches  Label matches used for scoring Monoisotopic mass of neutral peptide  $M_r(\text{calc})$ : 1504.7086

Fixed modifications: Carbamidomethyl (C) (apply to specified residues or termini only)

Ions Score: 33 Expect: 15

Matches : 10/199 fragment ions using 13 most intense peaks ([help](#))

| #  | Immon.         | a         | a <sup>0</sup> | b               | b <sup>0</sup> | d         | d'       | Seq. | v         | w         | w'        | y                | y*        | y <sup>0</sup>   | #  |
|----|----------------|-----------|----------------|-----------------|----------------|-----------|----------|------|-----------|-----------|-----------|------------------|-----------|------------------|----|
| 1  | 30.0338        | 30.0338   |                | 58.0287         |                | 44.0495   |          | G    |           |           |           |                  |           |                  | 13 |
| 2  | 136.0757       | 193.0972  |                | 221.0921        |                |           |          | Y    | 1340.6369 |           |           | 1448.6944        | 1431.6678 | 1430.6838        | 12 |
| 3  | 86.0964        | 306.1812  |                | 334.1761        |                | 278.1499  | 292.1656 | I    | 1227.5528 | 1240.5732 | 1254.5889 | 1285.6311        | 1268.6045 | 1267.6205        | 11 |
| 4  | 60.0444        | 393.2132  | 375.2027       | <b>421.2082</b> | 403.1976       | 377.2183  |          | S    | 1140.5208 | 1139.5255 |           | <b>1172.5470</b> | 1155.5204 | 1154.5364        | 10 |
| 5  | <b>70.0651</b> | 490.2660  | 472.2554       | 518.2609        | 500.2504       | 464.2504  |          | P    | 1043.4680 | 1042.4728 |           | <b>1085.5150</b> | 1068.4884 | <b>1067.5044</b> | 9  |
| 6  | 136.0757       | 653.3293  | 635.3188       | 681.3243        | 663.3137       |           |          | Y    | 880.4047  |           |           | 988.4622         | 971.4357  | 970.4516         | 8  |
| 7  | 120.0808       | 800.3978  | 782.3872       | 828.3927        | 810.3821       |           |          | F    | 733.3363  |           |           | <b>825.3989</b>  | 808.3723  | 807.3883         | 7  |
| 8  | 72.0808        | 899.4662  | 881.4556       | <b>927.4611</b> | 909.4505       | 885.4505  |          | V    | 634.2679  | 647.2883  |           | <b>678.3305</b>  | 661.3039  | 660.3199         | 6  |
| 9  | 74.0600        | 1000.5138 | 982.5033       | 1028.5088       | 1010.4982      | 984.5189  | 986.4982 | T    | 533.2202  | 546.2406  | 548.2198  | <b>579.2620</b>  | 562.2355  | 561.2515         | 5  |
| 10 | 88.0393        | 1115.5408 | 1097.5302      | 1143.5357       | 1125.5251      | 1071.5510 |          | D    | 418.1932  | 417.1980  |           | 478.2144         | 461.1878  | 460.2038         | 4  |
| 11 | 60.0444        | 1202.5728 | 1184.5623      | 1230.5677       | 1212.5572      | 1186.5779 |          | S    | 331.1612  | 330.1660  |           | 363.1874         | 346.1609  | 345.1769         | 3  |
| 12 | 102.0550       | 1331.6154 | 1313.6048      | 1359.6103       | 1341.5998      | 1273.6099 |          | E    | 202.1186  | 201.1234  |           | 276.1554         | 259.1288  | 258.1448         | 2  |
| 13 | 101.1073       |           |                |                 |                |           |          | K    | 74.0237   | 73.0284   |           | 147.1128         | 130.0863  |                  | 1  |

| Seq   | ya       | yb       | Seq   | ya       | yb       | Seq    | ya       | yb       |
|-------|----------|----------|-------|----------|----------|--------|----------|----------|
| YI    | 249.1598 | 277.1547 | YIS   | 336.1918 | 364.1867 | YISP   | 433.2445 | 461.2395 |
| YISPY | 596.3079 | 624.3028 | IS    | 173.1285 | 201.1234 | ISP    | 270.1812 | 298.1761 |
| ISPY  | 433.2445 | 461.2395 | ISPYF | 580.3130 | 608.3079 | ISPYFV | 679.3814 | 707.3763 |
| SP    | 157.0972 | 185.0921 | SPY   | 320.1605 | 348.1554 | SPYF   | 467.2289 | 495.2238 |

|               |          |          |               |          |          |               |          |          |
|---------------|----------|----------|---------------|----------|----------|---------------|----------|----------|
| <b>SPYFV</b>  | 566.2973 | 594.2922 | <b>SPYFVT</b> | 667.3450 | 695.3399 | <b>PY</b>     | 233.1285 | 261.1234 |
| <b>PYF</b>    | 380.1969 | 408.1918 | <b>PYFV</b>   | 479.2653 | 507.2602 | <b>PYFVT</b>  | 580.3130 | 608.3079 |
| <b>PYFVTD</b> | 695.3399 | 723.3348 | <b>YF</b>     | 283.1441 | 311.1390 | <b>YFV</b>    | 382.2125 | 410.2074 |
| <b>YFVT</b>   | 483.2602 | 511.2551 | <b>YFVTD</b>  | 598.2871 | 626.2821 | <b>YFVTDS</b> | 685.3192 | 713.3141 |
| <b>FV</b>     | 219.1492 | 247.1441 | <b>FVT</b>    | 320.1969 | 348.1918 | <b>FVTD</b>   | 435.2238 | 463.2187 |
| <b>FVTDS</b>  | 522.2558 | 550.2508 | <b>FVTDSE</b> | 651.2984 | 679.2933 | <b>VT</b>     | 173.1285 | 201.1234 |
| <b>VTD</b>    | 288.1554 | 316.1503 | <b>VTDS</b>   | 375.1874 | 403.1823 | <b>VTDSE</b>  | 504.2300 | 532.2249 |
| <b>TD</b>     | 189.0870 | 217.0819 | <b>TDS</b>    | 276.1190 | 304.1139 | <b>TDSE</b>   | 405.1616 | 433.1565 |
| <b>DS</b>     | 175.0713 | 203.0662 | <b>DSE</b>    | 304.1139 | 332.1088 | <b>SE</b>     | 189.0870 | 217.0819 |

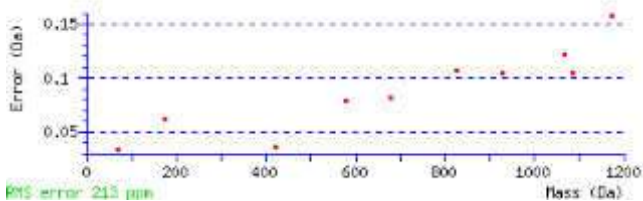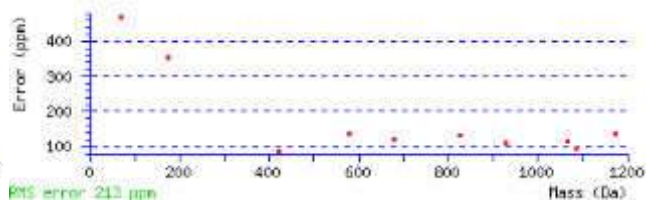

NCBI **BLAST** search of [GYISPYFVTDSEK](#)

(Parameters: blastp, nr protein database, expect=20000, no filter, PAM30)

Other BLAST [web gateways](#)

#### All matches to this query

| Score | Mr(calc)  | Delta  | Sequence                       |
|-------|-----------|--------|--------------------------------|
| 33.5  | 1504.7086 | 0.0475 | <a href="#">GYISPYFVTDTDK</a>  |
| 33.5  | 1504.6756 | 0.0806 | <a href="#">GYISPYMVTDTDK</a>  |
| 33.5  | 1504.7086 | 0.0475 | <a href="#">GYLSPYFVTDTDK</a>  |
| 33.5  | 1504.6756 | 0.0806 | <a href="#">GYLSPYMVTDTDK</a>  |
| 33.5  | 1504.7086 | 0.0476 | <a href="#">GYISPYFVTDSEK</a>  |
| 33.5  | 1504.6756 | 0.0806 | <a href="#">GYISPYMVTDSEK</a>  |
| 33.5  | 1504.7086 | 0.0476 | <a href="#">GYLSPYFVTDSEK</a>  |
| 33.5  | 1504.6756 | 0.0806 | <a href="#">GYLSPYMVSDTEK</a>  |
| 33.5  | 1504.6756 | 0.0806 | <a href="#">GYLSPYMVTDSEK</a>  |
| 32.9  | 1504.7191 | 0.0370 | <a href="#">SMDSSADPLNVTLR</a> |

Mascot: <http://www.matrixscience.com/>

**MATRIX SCIENCE Mascot Search Results**

**Peptide View Spot no 92**

**MS/MS Fragmentation of EVELEDPVENIGAK**

Found in **gi|15231255** in **NCBIInr**, TCP-1/cpn60 chaperonin family protein [Arabidopsis thaliana]

Match to Query 262: 1540.817724 from(1541.825000,1+) intensity(0.0000) index(25)

Title: Label: E15, Spot\_Id: 219902, Peak\_List\_Id: 228309, MSMS Job\_Run\_Id: 21986, Comment:

Data file C:\Documents and Settings\Administrator\Desktop\Farah-Garima 11May 2013\ppw\_E15\_136868276000.txt

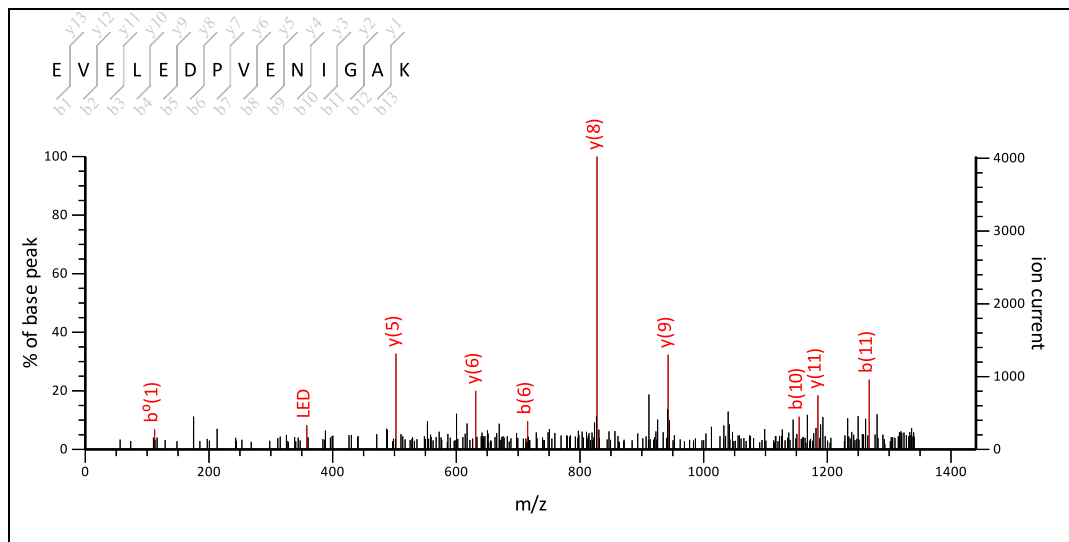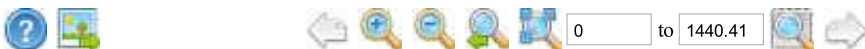

Label all possible matches  Label matches used for scoring

Monoisotopic mass of neutral peptide Mr(calc): 1540.7620

Fixed modifications: Carbamidomethyl (C) (apply to specified residues or termini only)

Ions Score: 39 Expect: 3.6

Matches : 11/237 fragment ions using 13 most intense peaks [\(help\)](#)

| #  | Immon.   | a         | a*        | a <sup>0</sup> | b                | b*        | b <sup>0</sup> | d         | d'        | Seq. | v         | w         | w'       | y                | y*        |
|----|----------|-----------|-----------|----------------|------------------|-----------|----------------|-----------|-----------|------|-----------|-----------|----------|------------------|-----------|
| 1  | 102.0550 | 102.0550  |           | 84.0444        | 130.0499         |           | 112.0393       | 44.0495   |           | E    |           |           |          |                  |           |
| 2  | 72.0808  | 201.1234  |           | 183.1128       | 229.1183         |           | 211.1077       | 187.1077  |           | V    | 1368.6642 | 1381.6846 |          | 1412.7268        | 1395.7002 |
| 3  | 102.0550 | 330.1660  |           | 312.1554       | <b>358.1609</b>  |           | 340.1503       | 272.1605  |           | E    | 1239.6216 | 1238.6263 |          | 1313.6583        | 1296.6318 |
| 4  | 86.0964  | 443.2500  |           | 425.2395       | 471.2449         |           | 453.2344       | 401.2031  |           | L    | 1126.5375 | 1125.5422 |          | <b>1184.6157</b> | 1167.5892 |
| 5  | 102.0550 | 572.2926  |           | 554.2821       | 600.2875         |           | 582.2770       | 514.2871  |           | E    | 997.4949  | 996.4997  |          | 1071.5317        | 1054.5051 |
| 6  | 88.0393  | 687.3196  |           | 669.3090       | <b>715.3145</b>  |           | 697.3039       | 643.3297  |           | D    | 882.4680  | 881.4727  |          | <b>942.4891</b>  | 925.4625  |
| 7  | 70.0651  | 784.3723  |           | 766.3618       | 812.3672         |           | 794.3567       | 758.3567  |           | P    | 785.4152  | 784.4199  |          | <b>827.4621</b>  | 810.4356  |
| 8  | 72.0808  | 883.4407  |           | 865.4302       | 911.4357         |           | 893.4251       | 869.4251  |           | V    | 686.3468  | 699.3672  |          | 730.4094         | 713.3828  |
| 9  | 102.0550 | 1012.4833 |           | 994.4728       | 1040.4782        |           | 1022.4677      | 954.4779  |           | E    | 557.3042  | 556.3089  |          | <b>631.3410</b>  | 614.3144  |
| 10 | 87.0553  | 1126.5263 | 1109.4997 | 1108.5157      | <b>1154.5212</b> | 1137.4946 | 1136.5106      | 1083.5204 |           | N    | 443.2613  | 442.2660  |          | <b>502.2984</b>  | 485.2718  |
| 11 | 86.0964  | 1239.6103 | 1222.5838 | 1221.5998      | <b>1267.6052</b> | 1250.5787 | 1249.5947      | 1211.5790 | 1225.5947 | I    | 330.1772  | 343.1976  | 357.2132 | 388.2554         | 371.2289  |
| 12 | 30.0338  | 1296.6318 | 1279.6052 | 1278.6212      | 1324.6267        | 1307.6002 | 1306.6161      |           |           | G    |           |           |          | 275.1714         | 258.1448  |
| 13 | 44.0495  | 1367.6689 | 1350.6424 | 1349.6583      | 1395.6638        | 1378.6373 | 1377.6533      |           |           | A    | 202.1186  |           |          | 218.1499         | 201.1234  |
| 14 | 101.1073 |           |           |                |                  |           |                |           |           | K    | 74.0237   | 73.0284   |          | 147.1128         | 130.0863  |

| Seq    | ya       | yb       | Seq    | ya       | yb       | Seq    | ya       | yb              |
|--------|----------|----------|--------|----------|----------|--------|----------|-----------------|
| VE     | 201.1234 | 229.1183 | VEL    | 314.2074 | 342.2023 | VELE   | 443.2500 | 471.2449        |
| VELED  | 558.2770 | 586.2719 | VELEDP | 655.3297 | 683.3246 | EL     | 215.1390 | 243.1339        |
| ELE    | 344.1816 | 372.1765 | ELED   | 459.2086 | 487.2035 | ELEDP  | 556.2613 | 584.2562        |
| ELEDPV | 655.3297 | 683.3246 | LE     | 215.1390 | 243.1339 | LED    | 330.1660 | <b>358.1609</b> |
| LEDP   | 427.2187 | 455.2136 | LEDPV  | 526.2871 | 554.2821 | LEDPVE | 655.3297 | 683.3246        |
| ED     | 217.0819 | 245.0768 | EDP    | 314.1347 | 342.1296 | EDPV   | 413.2031 | 441.1980        |
| EDPVE  | 542.2457 | 570.2406 | EDPVEN | 656.2886 | 684.2835 | DP     | 185.0921 | 213.0870        |



|        |          |          |         |          |          |       |          |          |
|--------|----------|----------|---------|----------|----------|-------|----------|----------|
| DPV    | 284.1605 | 312.1554 | DPVE    | 413.2031 | 441.1980 | DPVEN | 527.2460 | 555.2409 |
| DPVENI | 640.3301 | 668.3250 | DPVENIG | 697.3515 | 725.3464 | PV    | 169.1335 | 197.1285 |
| PVE    | 298.1761 | 326.1710 | PVEN    | 412.2191 | 440.2140 | PVENI | 525.3031 | 553.2980 |
| PVENIG | 582.3246 | 610.3195 | PVENIGA | 653.3617 | 681.3566 | VE    | 201.1234 | 229.1183 |
| VEN    | 315.1663 | 343.1612 | VENI    | 428.2504 | 456.2453 | VENIG | 485.2718 | 513.2667 |
| VENIGA | 556.3089 | 584.3039 | EN      | 216.0979 | 244.0928 | ENI   | 329.1819 | 357.1769 |
| ENIG   | 386.2034 | 414.1983 | ENIGA   | 457.2405 | 485.2354 | NI    | 200.1394 | 228.1343 |
| NIG    | 257.1608 | 285.1557 | NIGA    | 328.1979 | 356.1928 | IG    | 143.1179 | 171.1128 |
| IGA    | 214.1550 | 242.1499 | GA      | 101.0709 | 129.0659 |       |          |          |

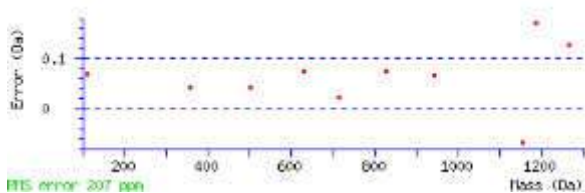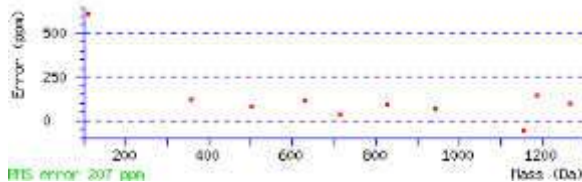

NCBI BLAST search of [EVELEDPVENIGAK](#)

(Parameters: blastp, nr protein database, expect=20000, no filter, PAM30)

Other BLAST [web gateways](#)

#### All matches to this query

| Score | Mr(calc)  | Delta   | Sequence                         |
|-------|-----------|---------|----------------------------------|
| 39.3  | 1540.7620 | 0.0557  | <a href="#">EVELEDPVENIGAK</a>   |
| 28.2  | 1540.8322 | -0.0144 | <a href="#">ETSGQAGTPIVLRGR</a>  |
| 26.8  | 1540.8865 | -0.0687 | <a href="#">EPLYLVVPETLLR</a>    |
| 22.4  | 1540.7621 | 0.0557  | <a href="#">EDLLEDAGVDPAGLK</a>  |
| 21.9  | 1540.8474 | -0.0297 | <a href="#">VSTSKFPVVPNRGR</a>   |
| 21.8  | 1540.7409 | 0.0768  | <a href="#">FSYSDDPINDLKK</a>    |
| 20.1  | 1540.8322 | -0.0144 | <a href="#">SGIDAVGOVDLGVRR</a>  |
| 20.0  | 1540.7845 | 0.0332  | <a href="#">GTAGTDPDGILQAGLR</a> |
| 19.0  | 1540.7998 | 0.0179  | <a href="#">WGEQVDPVKSQIR</a>    |
| 17.9  | 1540.8685 | -0.0508 | <a href="#">GLGSDATLVLINGRR</a>  |

Mascot: <http://www.matrixscience.com/>


**Mascot Search Results**
**Peptide View Spot no 92**

 MS/MS Fragmentation of **AAVEEGIVVGGGCTLLR**

 Found in **gi15231255** in **NCBI**nr, TCP-1/cpn60 chaperonin family protein [Arabidopsis thaliana]

Match to Query 275: 1699.963424 from(1700.970700,1+) intensity(0.0000) index(27)

Title: Label: E15, Spot\_Id: 219902, Peak\_List\_Id: 228285, MSMS Job\_Run\_Id: 21986, Comment:

Data file C:\Documents and Settings\Administrator\Desktop\Farah-Garima 11May 2013\ppw\_E15\_136868276000.txt

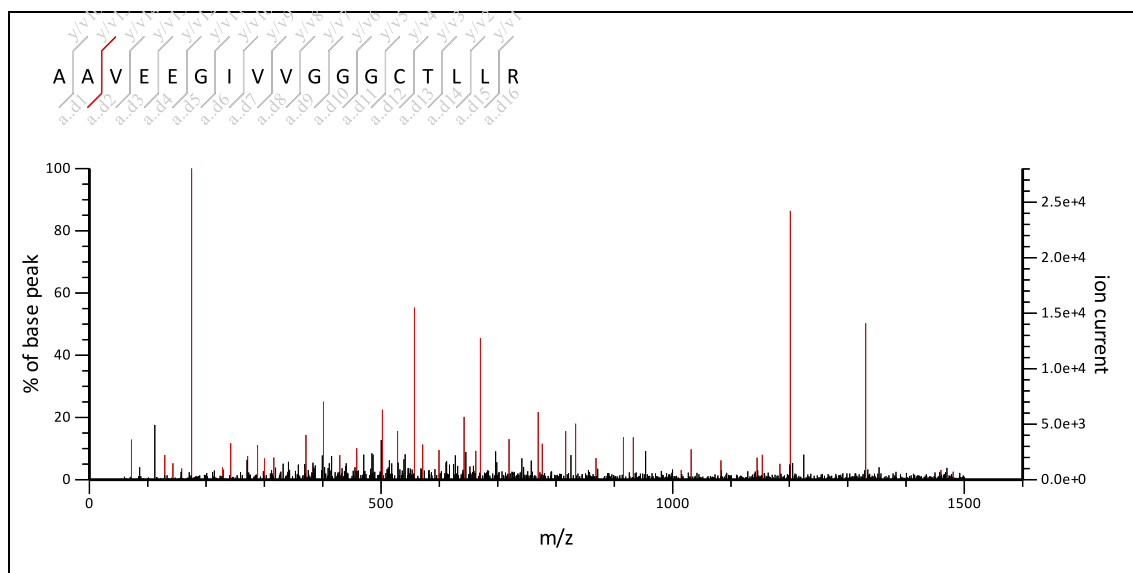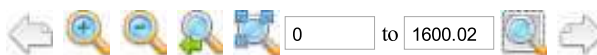
 Label all possible matches  Label matches used for scoring 

Monoisotopic mass of neutral peptide Mr(calc): 1699.8927

Fixed modifications: Carbamidomethyl (C) (apply to specified residues or termini only)

Ions Score: 111 Expect: 2.1e-07

 Matches : 66/298 fragment ions using 60 most intense peaks ([help](#))

| #  | Immon.   | a         | a <sup>0</sup> | b         | b <sup>0</sup> | d         | d'        | Seq. | v         | w         | w'        | y         | y*        | y <sup>0</sup> | #  |
|----|----------|-----------|----------------|-----------|----------------|-----------|-----------|------|-----------|-----------|-----------|-----------|-----------|----------------|----|
| 1  | 44.0495  | 44.0495   |                | 72.0444   |                | 44.0495   |           | A    |           |           |           |           |           |                | 17 |
| 2  | 44.0495  | 115.0866  |                | 143.0815  |                |           |           | A    | 1613.8316 |           |           | 1629.8629 | 1612.8363 | 1611.8523      | 16 |
| 3  | 72.0808  | 214.1550  |                | 242.1499  |                | 200.1394  |           | V    | 1514.7632 | 1527.7836 |           | 1558.8258 | 1541.7992 | 1540.8152      | 15 |
| 4  | 102.0550 | 343.1976  | 325.1870       | 371.1925  | 353.1819       | 285.1921  |           | E    | 1385.7206 | 1384.7253 |           | 1459.7573 | 1442.7308 | 1441.7468      | 14 |
| 5  | 102.0550 | 472.2402  | 454.2296       | 500.2351  | 482.2245       | 414.2347  |           | E    | 1256.6780 | 1255.6827 |           | 1330.7147 | 1313.6882 | 1312.7042      | 13 |
| 6  | 30.0338  | 529.2617  | 511.2511       | 557.2566  | 539.2460       |           |           | G    |           |           |           | 1201.6722 | 1184.6456 | 1183.6616      | 12 |
| 7  | 86.0964  | 642.3457  | 624.3352       | 670.3406  | 652.3301       | 614.3144  | 628.3301  | I    | 1086.5724 | 1099.5928 | 1113.6085 | 1144.6507 | 1127.6241 | 1126.6401      | 11 |
| 8  | 72.0808  | 741.4141  | 723.4036       | 769.4090  | 751.3985       | 727.3985  |           | V    | 987.5040  | 1000.5244 |           | 1031.5666 | 1014.5401 | 1013.5561      | 10 |
| 9  | 72.0808  | 840.4825  | 822.4720       | 868.4775  | 850.4669       | 826.4669  |           | V    | 888.4356  | 901.4560  |           | 932.4982  | 915.4717  | 914.4876       | 9  |
| 10 | 30.0338  | 897.5040  | 879.4934       | 925.4989  | 907.4884       |           |           | G    |           |           |           | 833.4298  | 816.4033  | 815.4192       | 8  |
| 11 | 30.0338  | 954.5255  | 936.5149       | 982.5204  | 964.5098       |           |           | G    |           |           |           | 776.4083  | 759.3818  | 758.3978       | 7  |
| 12 | 30.0338  | 1011.5469 | 993.5364       | 1039.5419 | 1021.5313      |           |           | G    |           |           |           | 719.3869  | 702.3603  | 701.3763       | 6  |
| 13 | 133.0430 | 1171.5776 | 1153.5670      | 1199.5725 | 1181.5619      | 1082.5841 |           | C    | 557.3406  | 556.3453  |           | 662.3654  | 645.3389  | 644.3548       | 5  |
| 14 | 74.0600  | 1272.6253 | 1254.6147      | 1300.6202 | 1282.6096      | 1256.6304 | 1258.6096 | T    | 456.2929  | 469.3133  | 471.2926  | 502.3348  | 485.3082  | 484.3242       | 4  |
| 15 | 86.0964  | 1385.7093 | 1367.6988      | 1413.7042 | 1395.6937      | 1343.6624 |           | L    | 343.2088  | 342.2136  |           | 401.2871  | 384.2605  |                | 3  |
| 16 | 86.0964  | 1498.7934 | 1480.7828      | 1526.7883 | 1508.7777      | 1456.7464 |           | L    | 230.1248  | 229.1295  |           | 288.2030  | 271.1765  |                | 2  |
| 17 | 129.1135 |           |                |           |                |           |           | R    | 74.0237   | 73.0284   |           | 175.1190  | 158.0924  |                | 1  |

| Seq | ya       | yb       | Seq | ya       | yb       | Seq  | ya       | yb       |
|-----|----------|----------|-----|----------|----------|------|----------|----------|
| AV  | 143.1179 | 171.1128 | AVE | 272.1605 | 300.1554 | AVEE | 401.2031 | 429.1980 |

|                 |                 |                 |                 |                 |                 |                |                 |                 |
|-----------------|-----------------|-----------------|-----------------|-----------------|-----------------|----------------|-----------------|-----------------|
| <b>AVEEG</b>    | <b>458.2245</b> | 486.2195        | <b>AVEEGI</b>   | <b>571.3086</b> | <b>599.3035</b> | <b>AVEEGIV</b> | <b>670.3770</b> | 698.3719        |
| <b>VE</b>       | 201.1234        | 229.1183        | <b>VEE</b>      | 330.1660        | 358.1609        | <b>VEEG</b>    | 387.1874        | 415.1823        |
| <b>VEEGI</b>    | <b>500.2715</b> | <b>528.2664</b> | <b>VEEGIV</b>   | <b>599.3399</b> | 627.3348        | <b>VEEGIVV</b> | 698.4083        | 726.4032        |
| <b>EE</b>       | 231.0975        | 259.0925        | <b>EEG</b>      | <b>288.1190</b> | <b>316.1139</b> | <b>EEGI</b>    | <b>401.2031</b> | <b>429.1980</b> |
| <b>EEGIV</b>    | <b>500.2715</b> | <b>528.2664</b> | <b>EEGIVV</b>   | <b>599.3399</b> | 627.3348        | <b>EEGIVVG</b> | 656.3614        | 684.3563        |
| <b>EG</b>       | 159.0764        | 187.0713        | <b>EGI</b>      | 272.1605        | <b>300.1554</b> | <b>EGIV</b>    | <b>371.2289</b> | <b>399.2238</b> |
| <b>EGIVV</b>    | 470.2973        | 498.2922        | <b>EGIVVG</b>   | 527.3188        | 555.3137        | <b>EGIVVGG</b> | 584.3402        | 612.3352        |
| <b>EGIVVGGG</b> | 641.3617        | 669.3566        | <b>GI</b>       | <b>143.1179</b> | 171.1128        | <b>GIV</b>     | <b>242.1863</b> | 270.1812        |
| <b>GIVV</b>     | 341.2547        | 369.2496        | <b>GIVVG</b>    | 398.2762        | 426.2711        | <b>GIVVGG</b>  | 455.2976        | 483.2926        |
| <b>GIVVGGG</b>  | 512.3191        | 540.3140        | <b>GIVVGGGC</b> | 672.3498        | 700.3447        | <b>IV</b>      | 185.1648        | 213.1598        |
| <b>IVV</b>      | 284.2333        | 312.2282        | <b>IVVG</b>     | 341.2547        | 369.2496        | <b>IVVGG</b>   | 398.2762        | 426.2711        |
| <b>IVVGGG</b>   | 455.2976        | 483.2926        | <b>IVVGGGC</b>  | 615.3283        | 643.3232        | <b>VV</b>      | 171.1492        | 199.1441        |
| <b>VVG</b>      | <b>228.1707</b> | 256.1656        | <b>VVGG</b>     | 285.1921        | 313.1870        | <b>VVGGG</b>   | 342.2136        | 370.2085        |
| <b>VVGGGC</b>   | <b>502.2442</b> | 530.2391        | <b>VVGGGCT</b>  | 603.2919        | 631.2868        | <b>VG</b>      | <b>129.1022</b> | 157.0972        |
| <b>VGG</b>      | 186.1237        | 214.1186        | <b>VGGG</b>     | 243.1452        | <b>271.1401</b> | <b>VGGGC</b>   | 403.1758        | 431.1707        |
| <b>VGGGCT</b>   | 504.2235        | 532.2184        | <b>VGGGCTL</b>  | 617.3076        | 645.3025        | <b>GG</b>      | 87.0553         | 115.0502        |
| <b>GGG</b>      | 144.0768        | 172.0717        | <b>GGGC</b>     | 304.1074        | 332.1023        | <b>GGGCT</b>   | 405.1551        | 433.1500        |
| <b>GGGCTL</b>   | 518.2391        | 546.2341        | <b>GGGCTLL</b>  | 631.3232        | 659.3181        | <b>GG</b>      | 87.0553         | 115.0502        |
| <b>GGC</b>      | 247.0859        | 275.0809        | <b>GGCT</b>     | 348.1336        | 376.1285        | <b>GGCTL</b>   | 461.2177        | 489.2126        |
| <b>GGCTLL</b>   | 574.3017        | 602.2967        | <b>GC</b>       | 190.0645        | 218.0594        | <b>GCT</b>     | 291.1122        | 319.1071        |
| <b>GCTL</b>     | 404.1962        | 432.1911        | <b>GCTLL</b>    | 517.2803        | 545.2752        | <b>CT</b>      | 234.0907        | 262.0856        |
| <b>CTL</b>      | 347.1748        | 375.1697        | <b>CTLL</b>     | 460.2588        | 488.2537        | <b>TL</b>      | 187.1441        | 215.1390        |
| <b>TLL</b>      | <b>300.2282</b> | 328.2231        | <b>LL</b>       | 199.1805        | 227.1754        |                |                 |                 |

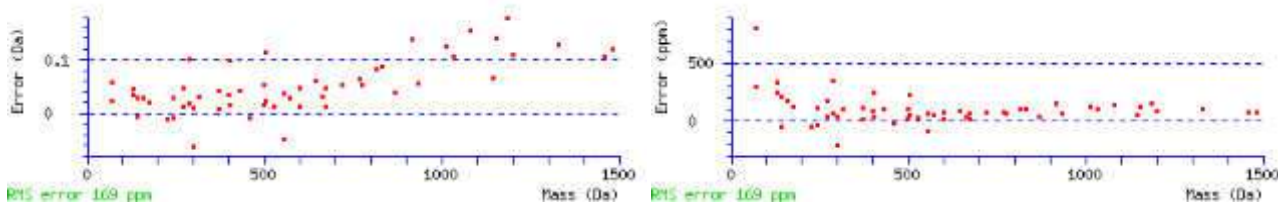

NCBI BLAST search of [AAVEEGIVVGGGCTLLR](#)  
 (Parameters: blastp, nr protein database, expect=20000, no filter, PAM30)  
 Other BLAST [web gateways](#)

All matches to this query

| Score | Mr(calc)  | Delta  | Sequence                          |
|-------|-----------|--------|-----------------------------------|
| 110.7 | 1699.8927 | 0.0707 | <a href="#">AAVEEGIVVGGGCTLIR</a> |
| 110.7 | 1699.8927 | 0.0707 | <a href="#">AAVEEGIVVGGGCTLLR</a> |
| 74.7  | 1699.8927 | 0.0707 | <a href="#">AAVEEGVIVGGGCTLLR</a> |
| 57.2  | 1699.8927 | 0.0707 | <a href="#">AAVEEGIVLGGCSLLR</a>  |
| 38.9  | 1699.9356 | 0.0278 | <a href="#">GLLDTGIVDISTLLR</a>   |
| 36.3  | 1699.9046 | 0.0589 | <a href="#">EAFEGPVDLRLIR</a>     |
| 33.8  | 1699.9178 | 0.0456 | <a href="#">AAVEEVIGVLLGMOAGK</a> |
| 33.5  | 1699.9145 | 0.0490 | <a href="#">SSLIRPDDFIPIAEK</a>   |
| 33.2  | 1699.9551 | 0.0083 | <a href="#">LLAMVVAAGMVMLPLR</a>  |
| 32.4  | 1699.9356 | 0.0278 | <a href="#">AGLSIDLTDSDVLLR</a>   |

Mascot: <http://www.matrixscience.com/>

# MATRIX SCIENCE Mascot Search Results

## Peptide View **Spot no 96**

MS/MS Fragmentation of **ACYECLR**

Found in **gi|11466795** in **NCBI nr**, ribulose-1,5-bisphosphate carboxylase/oxygenase large subunit [Oryza sativa Japonica Group]

Match to Query 2: 970.467514 from(971.474790,1+) intensity(0.0000) index(0)

Title: Label: E11, Spot\_Id: 216641, Peak\_List\_Id: 221252, MSMS Job\_Run\_Id: 21347, Comment:

Data file C:\Documents and Settings\Administrator\Desktop\farah BHU\RAJESH\12-1-13 raj\ppw\_E11\_135997701000.txt

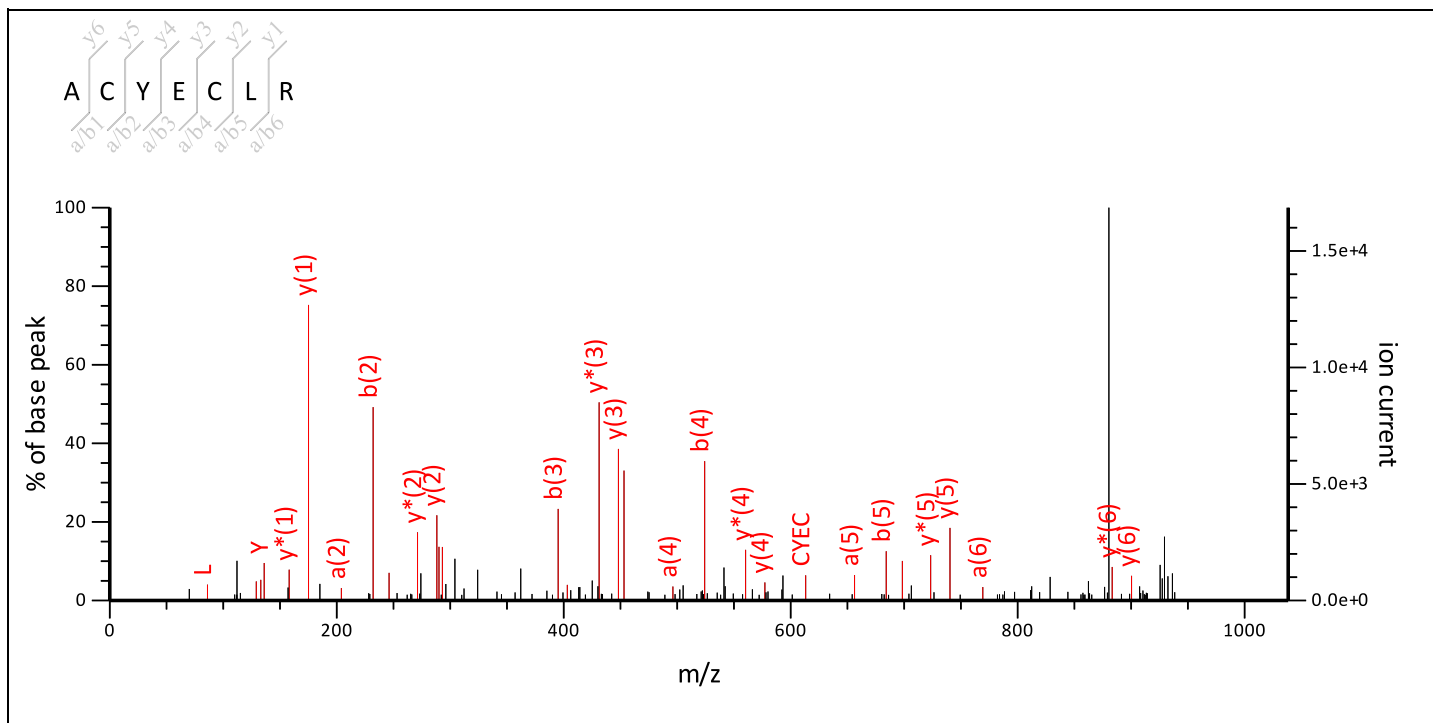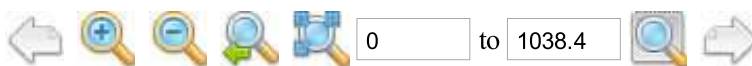

Label all possible matches  Label matches used for scoring

**Monoisotopic mass of neutral peptide Mr(calc):** 970.4001

**Fixed modifications:** Carbamidomethyl (C) (apply to specified residues or termini only)

**Ions Score:** 36 **Expect:** 1.7

**Matches :** 35/75 fragment ions using 54 most intense peaks ([help](#))

| # | Immon.   | a               | a <sup>0</sup> | b               | b <sup>0</sup> | d        | Seq. | v        | w        | y               | y*              | y <sup>0</sup> | # |
|---|----------|-----------------|----------------|-----------------|----------------|----------|------|----------|----------|-----------------|-----------------|----------------|---|
| 1 | 44.0495  | 44.0495         |                | 72.0444         |                | 44.0495  | A    |          |          |                 |                 |                | 7 |
| 2 | 133.0430 | <b>204.0801</b> |                | <b>232.0750</b> |                | 115.0866 | C    | 795.3454 | 794.3502 | <b>900.3702</b> | <b>883.3437</b> | 882.3597       | 6 |
| 3 | 136.0757 | 367.1435        |                | <b>395.1384</b> |                |          | Y    | 632.2821 |          | <b>740.3396</b> | <b>723.3130</b> | 722.3290       | 5 |
| 4 | 102.0550 | <b>496.1860</b> | 478.1755       | <b>524.1810</b> | 506.1704       | 438.1806 | E    | 503.2395 | 502.2442 | <b>577.2763</b> | <b>560.2497</b> | 559.2657       | 4 |
| 5 | 133.0430 | <b>656.2167</b> | 638.2061       | <b>684.2116</b> | 666.2010       | 567.2232 | C    | 343.2088 | 342.2136 | <b>448.2337</b> | <b>431.2071</b> |                | 3 |
| 6 | 86.0964  | <b>769.3008</b> | 751.2902       | 797.2957        | 779.2851       | 727.2538 | L    | 230.1248 | 229.1295 | <b>288.2030</b> | <b>271.1765</b> |                | 2 |
| 7 | 129.1135 |                 |                |                 |                |          | R    | 74.0237  | 73.0284  | <b>175.1190</b> | <b>158.0924</b> |                | 1 |

| Seq   | ya       | yb       | Seq | ya       | yb       | Seq  | ya       | yb       |
|-------|----------|----------|-----|----------|----------|------|----------|----------|
| CY    | 296.1063 | 324.1013 | CYE | 425.1489 | 453.1438 | CYEC | 585.1796 | 613.1745 |
| CYECL | 698.2636 | 726.2586 | YE  | 265.1183 | 293.1132 | YEC  | 425.1489 | 453.1438 |
| YECL  | 538.2330 | 566.2279 | EC  | 262.0856 | 290.0805 | ECL  | 375.1697 | 403.1646 |
| CL    | 246.1271 | 274.1220 |     |          |          |      |          |          |

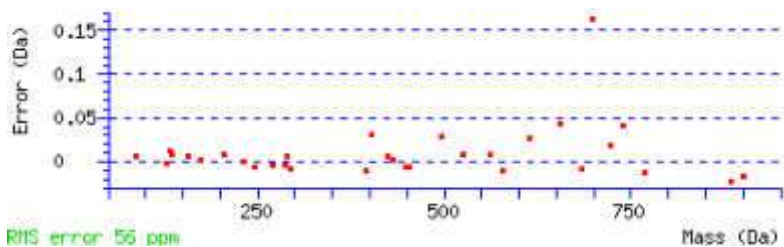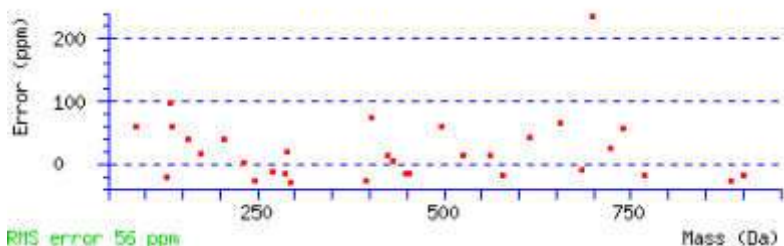

NCBI **BLAST** search of [ACYECLR](#)

(Parameters: blastp, nr protein database, expect=20000, no filter, PAM30)

Other BLAST [web gateways](#)

#### All matches to this query

| Score | Mr(calc) | Delta   | Sequence                   |
|-------|----------|---------|----------------------------|
| 35.9  | 970.4001 | 0.0675  | <a href="#">ACYECIR</a>    |
| 35.9  | 970.4001 | 0.0675  | <a href="#">ACYECLR</a>    |
| 35.9  | 970.4001 | 0.0675  | <a href="#">ACYECLR</a>    |
| 35.9  | 970.4001 | 0.0675  | <a href="#">ACYECLR</a>    |
| 35.9  | 970.4001 | 0.0675  | <a href="#">ACYECLR</a>    |
| 29.5  | 970.4807 | -0.0132 | <a href="#">ACFAPHLR</a>   |
| 22.4  | 970.4364 | 0.0311  | <a href="#">CVYMNIR</a>    |
| 22.4  | 969.4412 | 1.0263  | <a href="#">MVYECLR</a>    |
| 20.6  | 970.5382 | -0.0707 | <a href="#">LANPKCLR</a>   |
| 19.2  | 969.5243 | 0.9432  | <a href="#">AAATPAAELR</a> |

Mascot: <http://www.matrixscience.com/>



# Mascot Search Results

## Peptide View **Spot no 96**

MS/MS Fragmentation of **ALRLEDLR**

Found in **gi|11466795** in **NCBI**nr, ribulose-1,5-bisphosphate carboxylase/oxygenase large subunit [Oryza sativa Japonica Group]

Match to Query 4: 984.639634 from(985.646910,1+) intensity(0.0000) index(1)

Title: Label: E11, Spot\_Id: 216641, Peak\_List\_Id: 221259, MSMS Job\_Run\_Id: 21347, Comment:

Data file C:\Documents and Settings\Administrator\Desktop\farah BHU\RAJESH\12-1-13 raj\ppw\_E11\_135997701000.txt

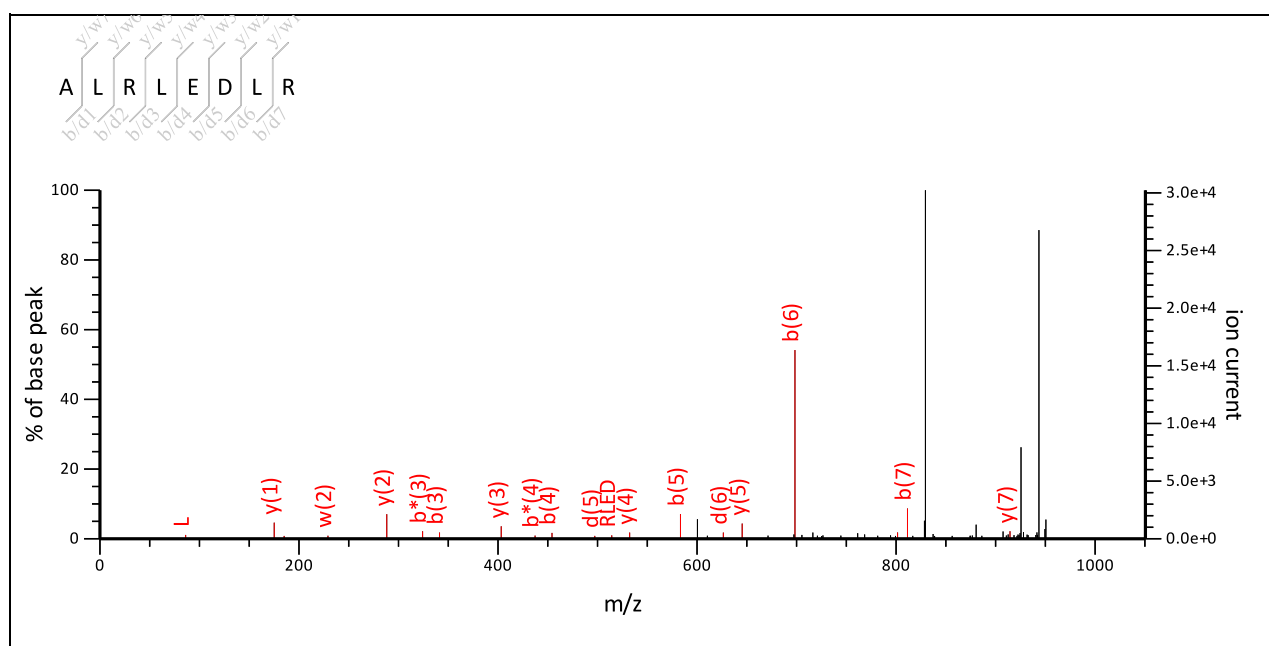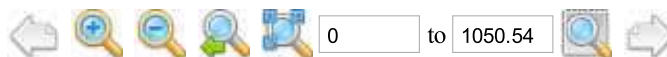

0 to 1050.54

Label all possible matches  Label matches used for scoring

**Monoisotopic mass of neutral peptide Mr(calc):** 984.5716

**Fixed modifications:** Carbamidomethyl (C) (apply to specified residues or termini only)

**Ions Score:** 49 **Expect:** 0.092

**Matches :** 24/106 fragment ions using 34 most intense peaks ([help](#))

| # | Immon.         | a        | a*       | a <sup>0</sup> | b               | b*              | b <sup>0</sup> | d               | Seq.     | v        | w               | y               | y*       | y <sup>0</sup>  | #        |
|---|----------------|----------|----------|----------------|-----------------|-----------------|----------------|-----------------|----------|----------|-----------------|-----------------|----------|-----------------|----------|
| 1 | 44.0495        | 44.0495  |          |                | 72.0444         |                 |                | 44.0495         | <b>A</b> |          |                 |                 |          |                 | <b>8</b> |
| 2 | <b>86.0964</b> | 157.1335 |          |                | <b>185.1285</b> |                 |                | 115.0866        | <b>L</b> | 856.4635 | 855.4683        | <b>914.5418</b> | 897.5152 | 896.5312        | <b>7</b> |
| 3 | 129.1135       | 313.2346 | 296.2081 |                | <b>341.2296</b> | <b>324.2030</b> |                | 228.1707        | <b>R</b> | 700.3624 | 699.3672        | <b>801.4577</b> | 784.4312 | 783.4472        | <b>6</b> |
| 4 | <b>86.0964</b> | 426.3187 | 409.2922 |                | <b>454.3136</b> | <b>437.2871</b> |                | 384.2718        | <b>L</b> | 587.2784 | 586.2831        | <b>645.3566</b> | 628.3301 | 627.3461        | <b>5</b> |
| 5 | 102.0550       | 555.3613 | 538.3348 | 537.3507       | <b>583.3562</b> | 566.3297        | 565.3457       | <b>497.3558</b> | <b>E</b> | 458.2358 | 457.2405        | <b>532.2726</b> | 515.2460 | <b>514.2620</b> | <b>4</b> |
| 6 | 88.0393        | 670.3883 | 653.3617 | 652.3777       | <b>698.3832</b> | 681.3566        | 680.3726       | <b>626.3984</b> | <b>D</b> | 343.2088 | 342.2136        | <b>403.2300</b> | 386.2034 | 385.2194        | <b>3</b> |
| 7 | <b>86.0964</b> | 783.4723 | 766.4458 | 765.4617       | <b>811.4672</b> | 794.4407        | 793.4567       | 741.4254        | <b>L</b> | 230.1248 | <b>229.1295</b> | <b>288.2030</b> | 271.1765 |                 | <b>2</b> |
| 8 | 129.1135       |          |          |                |                 |                 |                |                 | <b>R</b> | 74.0237  | 73.0284         | <b>175.1190</b> | 158.0924 |                 | <b>1</b> |

| Seq          | ya       | yb              | Seq          | ya       | yb       | Seq         | ya       | yb       |
|--------------|----------|-----------------|--------------|----------|----------|-------------|----------|----------|
| <b>LR</b>    | 242.1975 | 270.1925        | <b>LRL</b>   | 355.2816 | 383.2765 | <b>LRLE</b> | 484.3242 | 512.3191 |
| <b>LRLED</b> | 599.3511 | 627.3461        | <b>RL</b>    | 242.1975 | 270.1925 | <b>RLE</b>  | 371.2401 | 399.2350 |
| <b>RLED</b>  | 486.2671 | <b>514.2620</b> | <b>RLEDL</b> | 599.3511 | 627.3461 | <b>LE</b>   | 215.1390 | 243.1339 |
| <b>LED</b>   | 330.1660 | 358.1609        | <b>LEDL</b>  | 443.2500 | 471.2449 | <b>ED</b>   | 217.0819 | 245.0768 |

|            |          |          |           |          |                 |  |  |  |
|------------|----------|----------|-----------|----------|-----------------|--|--|--|
| <b>EDL</b> | 330.1660 | 358.1609 | <b>DL</b> | 201.1234 | <b>229.1183</b> |  |  |  |
|------------|----------|----------|-----------|----------|-----------------|--|--|--|

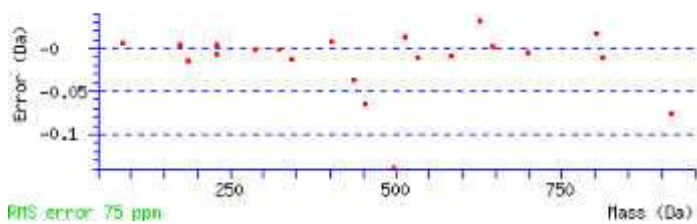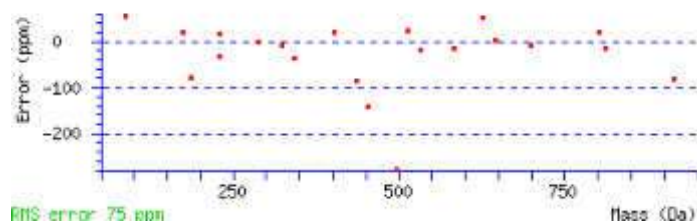

NCBI **BLAST** search of [ALRLEDLR](#)

(Parameters: blastp, nr protein database, expect=20000, no filter, PAM30)

Other BLAST [web gateways](#)

#### All matches to this query

| Score | Mr(calc) | Delta  | Sequence                 |
|-------|----------|--------|--------------------------|
| 50.9  | 984.5716 | 0.0680 | <a href="#">ALRIEDLR</a> |
| 50.9  | 984.5716 | 0.0680 | <a href="#">ALRIEDLR</a> |
| 50.7  | 984.0796 | 0.5600 | <a href="#">ALRLEBLR</a> |
| 50.7  | 984.0796 | 0.5600 | <a href="#">ALRLEBLR</a> |
| 49.1  | 984.5716 | 0.0680 | <a href="#">AIRLEDLR</a> |
| 49.1  | 984.5716 | 0.0680 | <a href="#">AIRLEDLR</a> |
| 49.1  | 984.5716 | 0.0680 | <a href="#">ALRLEDIR</a> |
| 49.1  | 984.5716 | 0.0680 | <a href="#">ALRLEDIR</a> |
| 49.1  | 984.5716 | 0.0680 | <a href="#">ALRLEDLR</a> |
| 49.1  | 984.5716 | 0.0680 | <a href="#">ALRLEDLR</a> |

Mascot: <http://www.matrixscience.com/>




**Mascot Search Results**
**Peptide View Spot no 96**
**MS/MS Fragmentation of FVFCAEAIYK**

 Found in **gi11466795** in **NCBI nr**, ribulose-1,5-bisphosphate carboxylase/oxygenase large subunit [Oryza sativa Japonica Group]

Match to Query 9: 1246.668124 from(1247.675400,1+) intensity(0.0000) index(4)

Title: Label: E11, Spot\_Id: 216641, Peak\_List\_Id: 221255, MSMS Job\_Run\_Id: 21347, Comment:

Data file C:\Documents and Settings\Administrator\Desktop\farah BHU\RAJESH\12-1-13 raj\ppw\_E11\_135997701000.txt

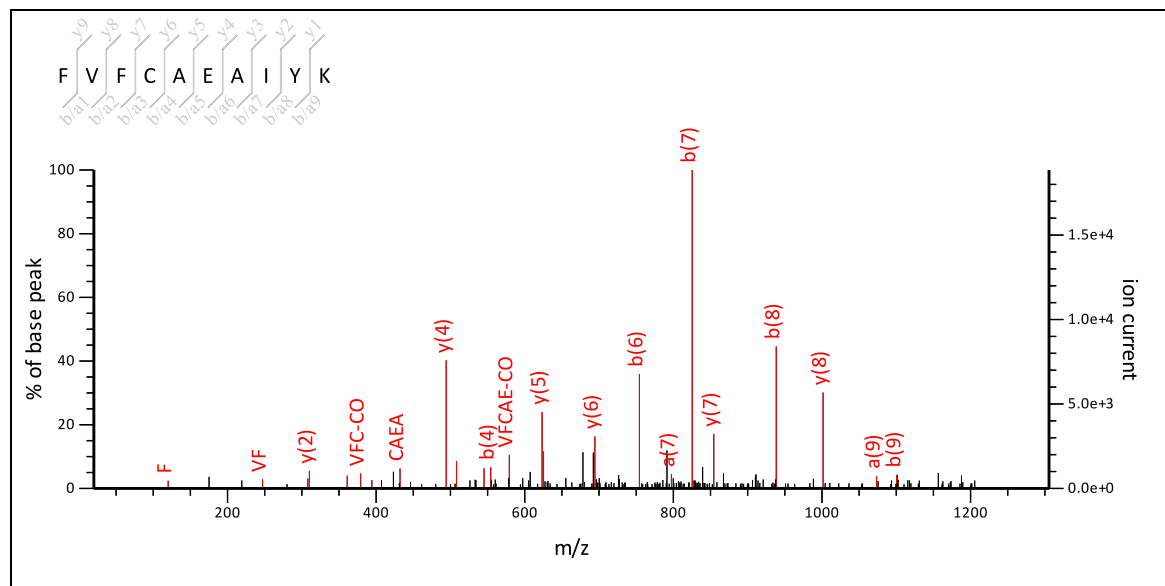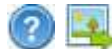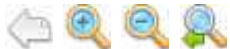

20.1 to 1305.58

 Label all possible matches  Label matches used for scoring 

Monoisotopic mass of neutral peptide Mr(calc): 1246.6056

Fixed modifications: Carbamidomethyl (C) (apply to specified residues or termini only)

Ions Score: 68 Expect: 0.0011

 Matches : 32/129 fragment ions using 33 most intense peaks ([help](#))

| #  | Immon.   | a         | a <sup>0</sup> | b         | b <sup>0</sup> | d        | d <sup>+</sup> | Seq. | v         | w         | w <sup>+</sup> | y         | y <sup>*</sup> | y <sup>0</sup> | #  |
|----|----------|-----------|----------------|-----------|----------------|----------|----------------|------|-----------|-----------|----------------|-----------|----------------|----------------|----|
| 1  | 120.0808 | 120.0808  |                | 148.0757  |                | 44.0495  |                | F    |           |           |                |           |                |                | 10 |
| 2  | 72.0808  | 219.1492  |                | 247.1441  |                | 205.1335 |                | V    | 1056.4819 | 1069.5023 |                | 1100.5445 | 1083.5179      | 1082.5339      | 9  |
| 3  | 120.0808 | 366.2176  |                | 394.2125  |                |          |                | F    | 909.4135  |           |                | 1001.4761 | 984.4495       | 983.4655       | 8  |
| 4  | 133.0430 | 526.2483  |                | 554.2432  |                | 437.2547 |                | C    | 749.3828  | 748.3876  |                | 854.4077  | 837.3811       | 836.3971       | 7  |
| 5  | 44.0495  | 597.2854  |                | 625.2803  |                |          |                | A    | 678.3457  |           |                | 694.3770  | 677.3505       | 676.3665       | 6  |
| 6  | 102.0550 | 726.3280  | 708.3174       | 754.3229  | 736.3123       | 668.3225 |                | E    | 549.3031  | 548.3079  |                | 623.3399  | 606.3134       | 605.3293       | 5  |
| 7  | 44.0495  | 797.3651  | 779.3545       | 825.3600  | 807.3494       |          |                | A    | 478.2660  |           |                | 494.2973  | 477.2708       |                | 4  |
| 8  | 86.0964  | 910.4491  | 892.4386       | 938.4441  | 920.4335       | 882.4178 | 896.4335       | I    | 365.1819  | 378.2023  | 392.2180       | 423.2602  | 406.2336       |                | 3  |
| 9  | 136.0757 | 1073.5125 | 1055.5019      | 1101.5074 | 1083.4968      |          |                | Y    | 202.1186  |           |                | 310.1761  | 293.1496       |                | 2  |
| 10 | 101.1073 |           |                |           |                |          |                | K    | 74.0237   | 73.0284   |                | 147.1128  | 130.0863       |                | 1  |

| Seq    | ya       | yb       | Seq    | ya       | yb       | Seq    | ya       | yb       |
|--------|----------|----------|--------|----------|----------|--------|----------|----------|
| VF     | 219.1492 | 247.1441 | VFC    | 379.1798 | 407.1748 | VFCA   | 450.2170 | 478.2119 |
| VFCAE  | 579.2595 | 607.2545 | VFCAEA | 650.2967 | 678.2916 | FC     | 280.1114 | 308.1063 |
| FCA    | 351.1485 | 379.1435 | FCAE   | 480.1911 | 508.1860 | FCAEA  | 551.2282 | 579.2232 |
| FCAEAI | 664.3123 | 692.3072 | CA     | 204.0801 | 232.0750 | CAE    | 333.1227 | 361.1176 |
| CAEA   | 404.1598 | 432.1547 | CAEAI  | 517.2439 | 545.2388 | CAEAIY | 680.3072 | 708.3021 |
| AE     | 173.0921 | 201.0870 | AEA    | 244.1292 | 272.1241 | AEAI   | 357.2132 | 385.2082 |

|              |          |          |           |          |          |            |          |          |
|--------------|----------|----------|-----------|----------|----------|------------|----------|----------|
| <b>AEAIY</b> | 520.2766 | 548.2715 | <b>EA</b> | 173.0921 | 201.0870 | <b>EAI</b> | 286.1761 | 314.1710 |
| <b>EAIY</b>  | 449.2395 | 477.2344 | <b>AI</b> | 157.1335 | 185.1285 | <b>AIY</b> | 320.1969 | 348.1918 |
| <b>IY</b>    | 249.1598 | 277.1547 |           |          |          |            |          |          |

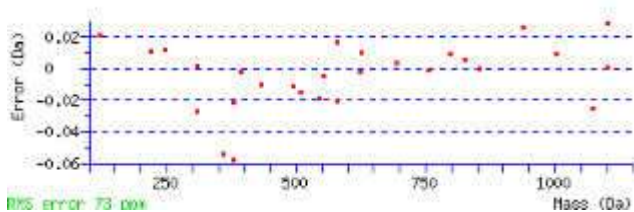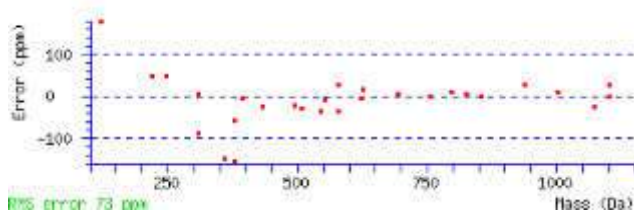

NCBI BLAST search of [FVFCAEAIYK](#)

(Parameters: blastp, nr protein database, expect=20000, no filter, PAM30)

Other BLAST [web gateways](#)

**All matches to this query**

| Score | Mr(calcd) | Delta  | Sequence                   |
|-------|-----------|--------|----------------------------|
| 67.5  | 1246.6056 | 0.0625 | <a href="#">FVFCAEAIYK</a> |
| 67.5  | 1246.6056 | 0.0625 | <a href="#">FVFCAEAIYK</a> |
| 67.5  | 1246.6056 | 0.0625 | <a href="#">FVFCAEAIYK</a> |
| 67.5  | 1246.6056 | 0.0625 | <a href="#">FVFCAEAIYK</a> |
| 67.5  | 1246.6056 | 0.0625 | <a href="#">FVFCAEAIYK</a> |
| 67.5  | 1246.6056 | 0.0625 | <a href="#">FVFCAEAIYK</a> |
| 67.5  | 1246.6056 | 0.0625 | <a href="#">FVFCAEAIYK</a> |
| 67.5  | 1246.6056 | 0.0625 | <a href="#">FVFCAEAIYK</a> |
| 67.5  | 1246.6056 | 0.0625 | <a href="#">FVFCAEALYK</a> |
| 67.5  | 1246.6056 | 0.0625 | <a href="#">FVFCAEALYK</a> |
| 67.5  | 1246.6056 | 0.0625 | <a href="#">FVFCAEALYK</a> |

Mascot: <http://www.matrixscience.com/>

**MATRIX SCIENCE Mascot Search Results**

**Peptide View Spot no 96**

MS/MS Fragmentation of **TFQPPHGIQVER**

Found in **gi|11466795** in **NCBI**nr, ribulose-1,5-bisphosphate carboxylase/oxygenase large subunit [Oryza sativa Japonica Group]

Match to Query 11: 1464.832324 from(1465.839600,1+) intensity(0.0000) index(5)

Title: Label: E11, Spot\_Id: 216641, Peak\_List\_Id: 221246, MSMS Job\_Run\_Id: 21347, Comment:

Data file C:\Documents and Settings\Administrator\Desktop\farah BHU\RAJESH\12-1-13 raj\ppw\_E11\_135997701000.txt

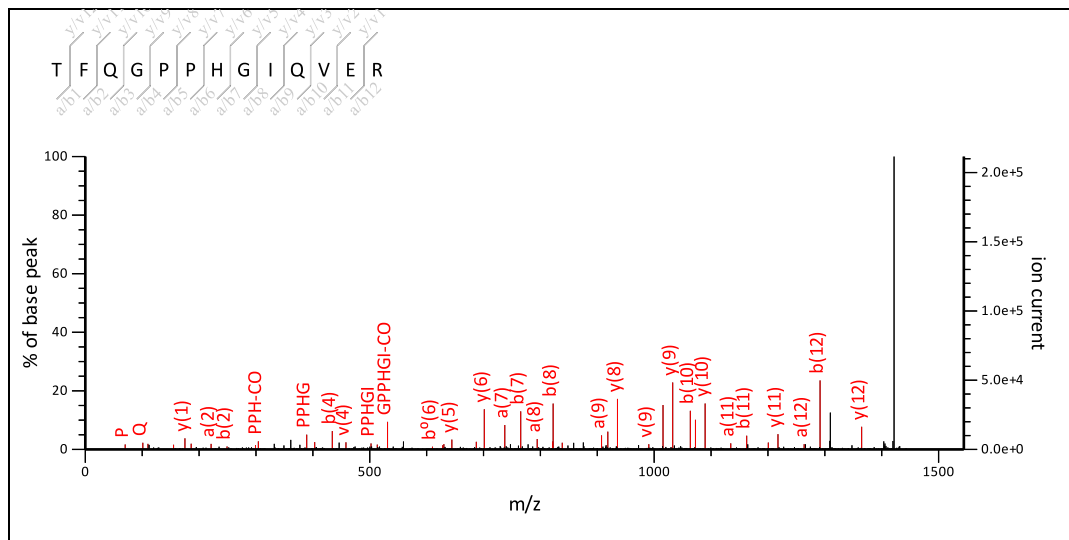

Navigation icons: Home, Back, Forward, Search, Print, Refresh, Stop. Range: 0 to 1544.37

Label all possible matches  Label matches used for scoring

Monoisotopic mass of neutral peptide Mr(calc): 1464.7474

Fixed modifications: Carbamidomethyl (C) (apply to specified residues or termini only)

Ions Score: 117 Expect: 1.5e-08

Matches : 61/229 fragment ions using 56 most intense peaks [\(help\)](#)

| #  | Immon.          | a                | a*              | a <sup>0</sup> | b                | b*              | b <sup>0</sup>  | d         | d'       | Seq. | v               | w         | w'       | y                | y*               |
|----|-----------------|------------------|-----------------|----------------|------------------|-----------------|-----------------|-----------|----------|------|-----------------|-----------|----------|------------------|------------------|
| 1  | 74.0600         | 74.0600          |                 | 56.0495        | 102.0550         |                 | 84.0444         | 44.0495   |          | T    |                 |           |          |                  |                  |
| 2  | 120.0808        | <b>221.1285</b>  |                 | 203.1179       | <b>249.1234</b>  |                 | 231.1128        |           |          | F    | 1272.6444       |           |          | <b>1364.7070</b> | 1347.6804        |
| 3  | <b>101.0709</b> | 349.1870         | <b>332.1605</b> | 331.1765       | 377.1819         | 360.1554        | 359.1714        | 292.1656  |          | Q    | 1144.5858       | 1143.5905 |          | <b>1217.6385</b> | <b>1200.6120</b> |
| 4  | 30.0338         | 406.2085         | <b>389.1819</b> | 388.1979       | <b>434.2034</b>  | 417.1769        | 416.1928        |           |          | G    |                 |           |          | <b>1089.5800</b> | <b>1072.5534</b> |
| 5  | <b>70.0651</b>  | 503.2613         | 486.2347        | 485.2507       | <b>531.2562</b>  | 514.2296        | <b>513.2456</b> | 477.2456  |          | P    | <b>990.5116</b> | 989.5163  |          | <b>1032.5585</b> | <b>1015.5320</b> |
| 6  | <b>70.0651</b>  | 600.3140         | 583.2875        | 582.3035       | <b>628.3089</b>  | 611.2824        | <b>610.2984</b> | 574.2984  |          | P    | 893.4588        | 892.4635  |          | <b>935.5057</b>  | <b>918.4792</b>  |
| 7  | <b>110.0713</b> | <b>737.3729</b>  | 720.3464        | 719.3624       | <b>765.3679</b>  | 748.3413        | 747.3573        |           |          | H    | 756.3999        |           |          | <b>838.4530</b>  | <b>821.4264</b>  |
| 8  | 30.0338         | <b>794.3944</b>  | 777.3679        | 776.3838       | <b>822.3893</b>  | 805.3628        | 804.3787        |           |          | G    |                 |           |          | <b>701.3941</b>  | 684.3675         |
| 9  | 86.0964         | <b>907.4785</b>  | 890.4519        | 889.4679       | <b>935.4734</b>  | <b>918.4468</b> | 917.4628        | 879.4472  | 893.4628 | I    | 586.2944        | 599.3148  | 613.3304 | <b>644.3726</b>  | 627.3461         |
| 10 | <b>101.0709</b> | 1035.5370        | 1018.5105       | 1017.5265      | <b>1063.5320</b> | 1046.5054       | 1045.5214       | 978.5156  |          | Q    | <b>458.2358</b> | 457.2405  |          | <b>531.2885</b>  | 514.2620         |
| 11 | 72.0808         | <b>1134.6055</b> | 1117.5789       | 1116.5949      | <b>1162.6004</b> | 1145.5738       | 1144.5898       | 1120.5898 |          | V    | 359.1674        | 372.1878  |          | <b>403.2300</b>  | 386.2034         |
| 12 | 102.0550        | <b>1263.6480</b> | 1246.6215       | 1245.6375      | <b>1291.6430</b> | 1274.6164       | 1273.6324       | 1205.6426 |          | E    | 230.1248        | 229.1295  |          | <b>304.1615</b>  | 287.1350         |
| 13 | 129.1135        |                  |                 |                |                  |                 |                 |           |          | R    | 74.0237         | 73.0284   |          | <b>175.1190</b>  | 158.0924         |

| Seq   | ya       | yb              | Seq    | ya              | yb              | Seq     | ya              | yb              |
|-------|----------|-----------------|--------|-----------------|-----------------|---------|-----------------|-----------------|
| FQ    | 248.1394 | 276.1343        | FQG    | 305.1608        | 333.1557        | FQGP    | 402.2136        | 430.2085        |
| FQPPP | 499.2663 | 527.2613        | FQPPH  | 636.3253        | 664.3202        | FQPPHG  | 693.3467        | 721.3416        |
| QG    | 158.0924 | <b>186.0873</b> | QGP    | 255.1452        | 283.1401        | QGPP    | 352.1979        | 380.1928        |
| QPPH  | 489.2568 | 517.2518        | QPPHG  | 546.2783        | 574.2732        | QPPHGI  | 659.3624        | <b>687.3573</b> |
| GP    | 127.0866 | <b>155.0815</b> | GPP    | 224.1394        | 252.1343        | GPPH    | <b>361.1983</b> | <b>389.1932</b> |
| GPPHG | 418.2197 | 446.2146        | GPPHGI | <b>531.3038</b> | <b>559.2987</b> | GPPHGIQ | 659.3624        | <b>687.3573</b> |
| PP    | 167.1179 | 195.1128        | PPH    | <b>304.1768</b> | <b>332.1717</b> | PPHG    | <b>361.1983</b> | <b>389.1932</b> |
| PPHGI | 474.2823 | <b>502.2772</b> | PPHGIQ | 602.3409        | <b>630.3358</b> | PH      | 207.1240        | 235.1190        |

|               |          |          |              |          |                 |               |          |          |
|---------------|----------|----------|--------------|----------|-----------------|---------------|----------|----------|
| <b>PHG</b>    | 264.1455 | 292.1404 | <b>PHGI</b>  | 377.2296 | 405.2245        | <b>PHGIQ</b>  | 505.2881 | 533.2831 |
| <b>PHGIQV</b> | 604.3566 | 632.3515 | <b>HG</b>    | 167.0927 | 195.0877        | <b>HGI</b>    | 280.1768 | 308.1717 |
| <b>HGIQ</b>   | 408.2354 | 436.2303 | <b>HGIQV</b> | 507.3038 | 535.2987        | <b>HGIQVE</b> | 636.3464 | 664.3413 |
| <b>GI</b>     | 143.1179 | 171.1128 | <b>GIQ</b>   | 271.1765 | <b>299.1714</b> | <b>GIQV</b>   | 370.2449 | 398.2398 |
| <b>GIQVE</b>  | 499.2875 | 527.2824 | <b>IQ</b>    | 214.1550 | 242.1499        | <b>IQV</b>    | 313.2234 | 341.2183 |
| <b>IQVE</b>   | 442.2660 | 470.2609 | <b>QV</b>    | 200.1394 | 228.1343        | <b>QVE</b>    | 329.1819 | 357.1769 |
| <b>VE</b>     | 201.1234 | 229.1183 |              |          |                 |               |          |          |

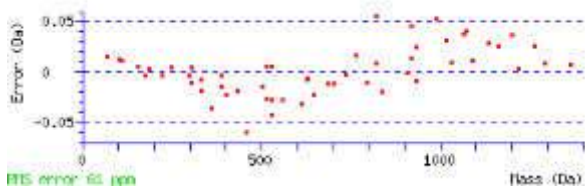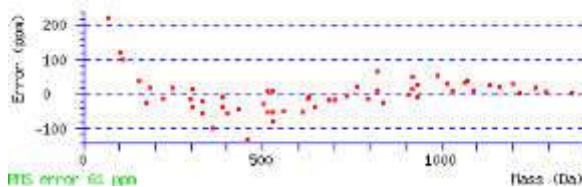

NCBI **BLAST** search of [TFOGPPHGIOVER](#)

(Parameters: blastp, nr protein database, expect=20000, no filter, PAM30)

Other BLAST [web gateways](#)

#### All matches to this query

| Score | Mr(calc)  | Delta  | Sequence                      |
|-------|-----------|--------|-------------------------------|
| 116.9 | 1464.7838 | 0.0486 | <a href="#">TFKGPPHGIOVER</a> |
| 116.9 | 1464.7838 | 0.0486 | <a href="#">TFKGPPHGIOVER</a> |
| 116.9 | 1464.7838 | 0.0486 | <a href="#">TFOGPPHGIKVER</a> |
| 116.9 | 1464.7838 | 0.0486 | <a href="#">TFOGPPHGIKVER</a> |
| 116.9 | 1464.7474 | 0.0849 | <a href="#">TFOGPPHGIOVER</a> |
| 116.9 | 1464.7474 | 0.0849 | <a href="#">TFOGPPHGIOVER</a> |
| 116.9 | 1464.7474 | 0.0849 | <a href="#">TFOGPPHGIOVER</a> |
| 116.9 | 1464.7474 | 0.0849 | <a href="#">TFOGPPHGIOVER</a> |
| 116.9 | 1464.7474 | 0.0849 | <a href="#">TFOGPPHGIOVER</a> |
| 116.9 | 1464.7474 | 0.0849 | <a href="#">TFOGPPHGIOVER</a> |

Mascot: <http://www.matrixscience.com/>

**MATRIX SCIENCE Mascot Search Results**

**Peptide View Spot no 96**

**MS/MS Fragmentation of YGRPLLGCTIKPK**

Found in **gi|11466795** in **NCBI**nr, ribulose-1,5-bisphosphate carboxylase/oxygenase large subunit [Oryza sativa Japonica Group]

Match to Query 13: 1501.927124 from(1502.934400,1+) intensity(0.0000) index(6)

Title: Label: E11, Spot\_Id: 216641, Peak\_List\_Id: 221250, MSMS Job\_Run\_Id: 21347, Comment:

Data file C:\Documents and Settings\Administrator\Desktop\farah BHU\RAJESH\12-1-13 rajppw\_E11\_135997701000.txt

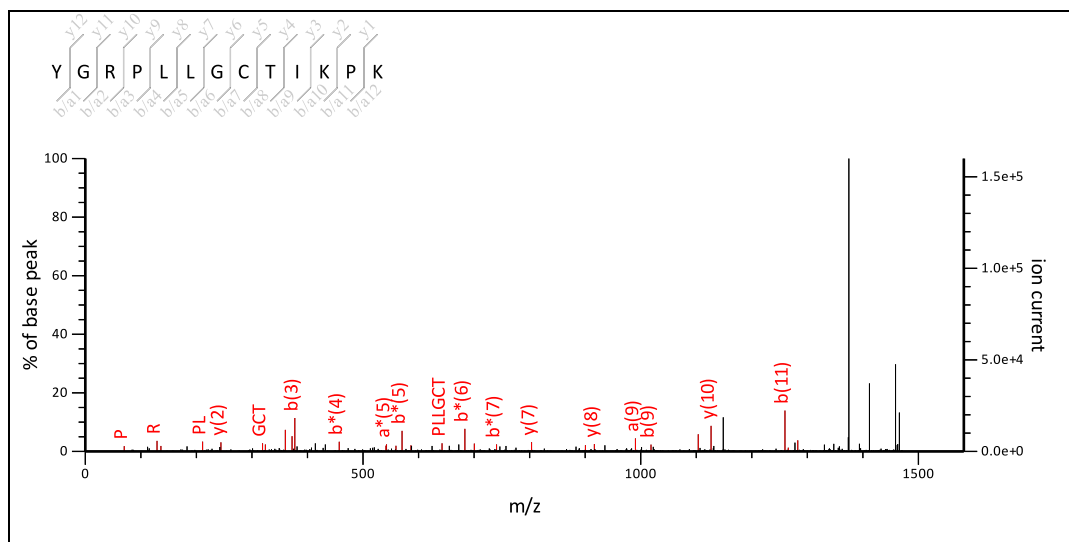

Navigation icons: Home, Back, Forward, Search, Print, etc.

0 to 1581.78

Label all possible matches  Label matches used for scoring

Monoisotopic mass of neutral peptide Mr(calc): 1501.8439

Fixed modifications: Carbamidomethyl (C) (apply to specified residues or termini only)

Ions Score: 40 Expect: 0.61

Matches : 33/211 fragment ions using 44 most intense peaks (help)

| #  | Immon.   | a         | a*        | a <sup>0</sup> | b         | b*        | b <sup>0</sup> | d         | d'        | Seq. | v         | w         | w'       | y         | y*        |
|----|----------|-----------|-----------|----------------|-----------|-----------|----------------|-----------|-----------|------|-----------|-----------|----------|-----------|-----------|
| 1  | 136.0757 | 136.0757  |           |                | 164.0706  |           |                | 44.0495   |           | Y    |           |           |          |           |           |
| 2  | 30.0338  | 193.0972  |           |                | 221.0921  |           |                |           |           | G    |           |           |          | 1339.7879 | 1322.7613 |
| 3  | 129.1135 | 349.1983  | 332.1717  |                | 377.1932  | 360.1666  |                | 264.1343  |           | R    | 1181.6711 | 1180.6758 |          | 1282.7664 | 1265.7398 |
| 4  | 70.0651  | 446.2510  | 429.2245  |                | 474.2459  | 457.2194  |                | 420.2354  |           | P    | 1084.6183 | 1083.6231 |          | 1126.6653 | 1109.6387 |
| 5  | 86.0964  | 559.3351  | 542.3085  |                | 587.3300  | 570.3035  |                | 517.2881  |           | L    | 971.5343  | 970.5390  |          | 1029.6125 | 1012.5860 |
| 6  | 86.0964  | 672.4192  | 655.3926  |                | 700.4141  | 683.3875  |                | 630.3722  |           | L    | 858.4502  | 857.4550  |          | 916.5285  | 899.5019  |
| 7  | 30.0338  | 729.4406  | 712.4141  |                | 757.4355  | 740.4090  |                |           |           | G    |           |           |          | 803.4444  | 786.4178  |
| 8  | 133.0430 | 889.4713  | 872.4447  |                | 917.4662  | 900.4396  |                | 800.4777  |           | C    | 641.3981  | 640.4028  |          | 746.4229  | 729.3964  |
| 9  | 74.0600  | 990.5189  | 973.4924  | 972.5084       | 1018.5139 | 1001.4873 | 1000.5033      | 974.5240  | 976.5033  | T    | 540.3504  | 553.3708  | 555.3501 | 586.3923  | 569.3657  |
| 10 | 86.0964  | 1103.6030 | 1086.5765 | 1085.5924      | 1131.5979 | 1114.5714 | 1113.5874      | 1075.5717 | 1089.5874 | I    | 427.2663  | 440.2867  | 454.3024 | 485.3446  | 468.3180  |
| 11 | 101.1073 | 1231.6980 | 1214.6714 | 1213.6874      | 1259.6929 | 1242.6663 | 1241.6823      | 1174.6401 |           | K    | 299.1714  | 298.1761  |          | 372.2605  | 355.2340  |
| 12 | 70.0651  | 1328.7507 | 1311.7242 | 1310.7402      | 1356.7457 | 1339.7191 | 1338.7351      | 1302.7351 |           | P    | 202.1186  | 201.1234  |          | 244.1656  | 227.1390  |
| 13 | 101.1073 |           |           |                |           |           |                |           |           | K    | 74.0237   | 73.0284   |          | 147.1128  | 130.0863  |

| Seq    | ya       | yb       | Seq    | ya       | yb       | Seq    | ya       | yb       |
|--------|----------|----------|--------|----------|----------|--------|----------|----------|
| GR     | 186.1349 | 214.1299 | GRP    | 283.1877 | 311.1826 | GRPL   | 396.2718 | 424.2667 |
| GRPLL  | 509.3558 | 537.3507 | GRPLLG | 566.3773 | 594.3722 | RP     | 226.1662 | 254.1612 |
| RPL    | 339.2503 | 367.2452 | RPLL   | 452.3344 | 480.3293 | RPLLG  | 509.3558 | 537.3507 |
| RPLLGC | 669.3865 | 697.3814 | PL     | 183.1492 | 211.1441 | PLL    | 296.2333 | 324.2282 |
| PLLG   | 353.2547 | 381.2496 | PLLGC  | 513.2854 | 541.2803 | PLLGCT | 614.3330 | 642.3280 |
| LL     | 199.1805 | 227.1754 | LLG    | 256.2020 | 284.1969 | LLGC   | 416.2326 | 444.2275 |
| LLGCT  | 517.2803 | 545.2752 | LLGCTI | 630.3643 | 658.3593 | LG     | 143.1179 | 171.1128 |
| LGC    | 303.1485 | 331.1435 | LGCT   | 404.1962 | 432.1911 | LGCTI  | 517.2803 | 545.2752 |

|               |          |          |              |          |          |               |          |                 |
|---------------|----------|----------|--------------|----------|----------|---------------|----------|-----------------|
| <b>LGCTIK</b> | 645.3752 | 673.3702 | <b>GC</b>    | 190.0645 | 218.0594 | <b>GCT</b>    | 291.1122 | <b>319.1071</b> |
| <b>GCTI</b>   | 404.1962 | 432.1911 | <b>GCTIK</b> | 532.2912 | 560.2861 | <b>GCTIKP</b> | 629.3439 | 657.3389        |
| <b>CT</b>     | 234.0907 | 262.0856 | <b>CTI</b>   | 347.1748 | 375.1697 | <b>CTIK</b>   | 475.2697 | 503.2646        |
| <b>CTIKP</b>  | 572.3225 | 600.3174 | <b>TI</b>    | 187.1441 | 215.1390 | <b>TIK</b>    | 315.2391 | 343.2340        |
| <b>TIKP</b>   | 412.2918 | 440.2867 | <b>IK</b>    | 214.1914 | 242.1863 | <b>IKP</b>    | 311.2442 | 339.2391        |
| <b>KP</b>     | 198.1601 | 226.1550 |              |          |          |               |          |                 |

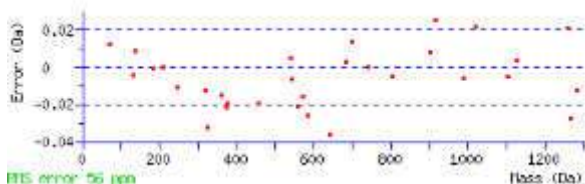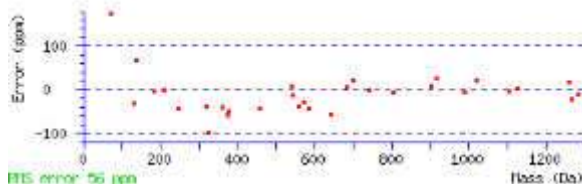

NCBI **BLAST** search of [YGRPLLGCTIKPK](#)

(Parameters: blastp, nr protein database, expect=20000, no filter, PAM30)

Other BLAST [web gateways](#)

#### All matches to this query

| Score | Mr(calc)  | Delta  | Sequence                      |
|-------|-----------|--------|-------------------------------|
| 40.4  | 1501.8439 | 0.0832 | <a href="#">YGRPILGCTIKPK</a> |
| 40.4  | 1501.8439 | 0.0832 | <a href="#">YGRPILGCTIKPK</a> |
| 40.4  | 1501.8439 | 0.0832 | <a href="#">YGRPLIGCTIKPK</a> |
| 40.4  | 1501.8439 | 0.0832 | <a href="#">YGRPLLGCTIKPK</a> |
| 40.4  | 1501.8439 | 0.0832 | <a href="#">YGRPLIGCTIKPK</a> |
| 40.4  | 1501.8439 | 0.0832 | <a href="#">YGRPLLGCTIKPK</a> |
| 40.4  | 1501.8439 | 0.0832 | <a href="#">YGRPLLGCTIKPK</a> |
| 40.4  | 1501.8439 | 0.0832 | <a href="#">YGRPLLGCTIKPK</a> |
| 40.4  | 1501.8439 | 0.0832 | <a href="#">YGRPLLGCTIKPK</a> |
| 40.4  | 1501.8439 | 0.0832 | <a href="#">YGRPLLGCTIKPK</a> |
| 40.4  | 1501.8439 | 0.0832 | <a href="#">YGRPLLGCTIKPK</a> |

Mascot: <http://www.matrixscience.com/>

**MATRIX SCIENCE Mascot Search Results**

**Peptide View Spot no 96**

MS/MS Fragmentation of **DRFVFCAEAIYK**

Found in **gi|11466795** in **NCBIInr**, ribulose-1,5-bisphosphate carboxylase/oxygenase large subunit [Oryza sativa Japonica Group]

Match to Query 15: 1517.823824 from(1518.831100,1+) intensity(0.0000) index(7)

Title: Label: E11, Spot\_Id: 216641, Peak\_List\_Id: 221258, MSMS Job\_Run\_Id: 21347, Comment:

Data file C:\Documents and Settings\Administrator\Desktop\farah BHU\RAJESH\12-1-13 rajppw\_E11\_135997701000.txt

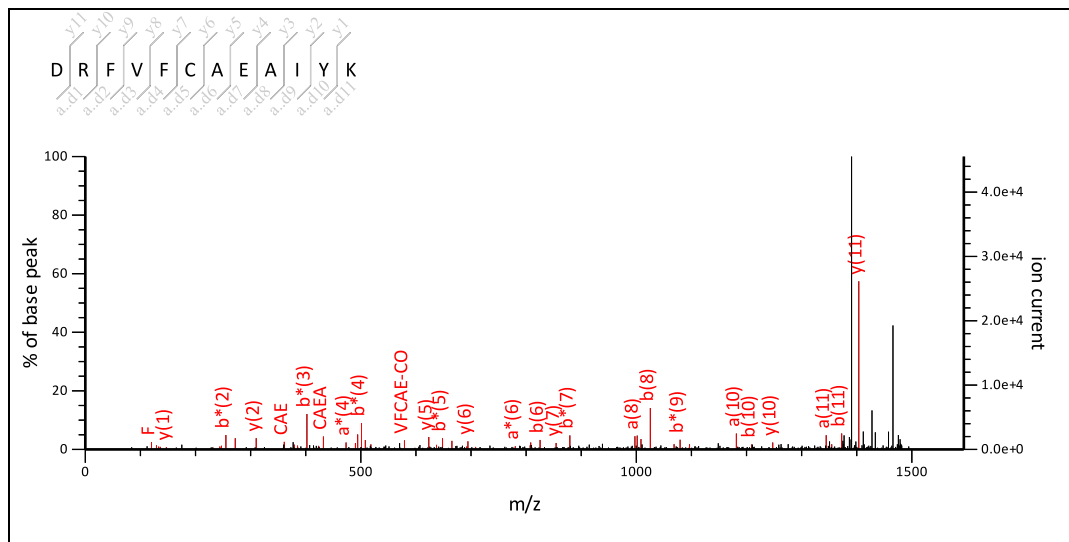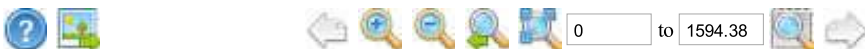

Label all possible matches  Label matches used for scoring

Monoisotopic mass of neutral peptide Mr(calc): 1517.7337

Fixed modifications: Carbamidomethyl (C) (apply to specified residues or termini only)

Ions Score: 51 Expect: 0.042

Matches : 59/194 fragment ions using 99 most intense peaks (help)

| #  | Immon.   | a         | a*        | a <sup>0</sup> | b         | b*        | b <sup>0</sup> | d         | d'        | Seq. | v         | w         | w'       | y         | y*        |
|----|----------|-----------|-----------|----------------|-----------|-----------|----------------|-----------|-----------|------|-----------|-----------|----------|-----------|-----------|
| 1  | 88.0393  | 88.0393   |           | 70.0287        | 116.0342  |           | 98.0237        | 44.0495   |           | D    |           |           |          |           |           |
| 2  | 129.1135 | 244.1404  | 227.1139  | 226.1299       | 272.1353  | 255.1088  | 254.1248       | 159.0764  |           | R    | 1302.6187 | 1301.6235 |          | 1403.7140 | 1386.6875 |
| 3  | 120.0808 | 391.2088  | 374.1823  | 373.1983       | 419.2037  | 402.1772  | 401.1932       |           |           | F    | 1155.5503 |           |          | 1247.6129 | 1230.5864 |
| 4  | 72.0808  | 490.2772  | 473.2507  | 472.2667       | 518.2722  | 501.2456  | 500.2616       | 476.2616  |           | V    | 1056.4819 | 1069.5023 |          | 1100.5445 | 1083.5179 |
| 5  | 120.0808 | 637.3457  | 620.3191  | 619.3351       | 665.3406  | 648.3140  | 647.3300       |           |           | F    | 909.4135  |           |          | 1001.4761 | 984.4495  |
| 6  | 133.0430 | 797.3763  | 780.3498  | 779.3657       | 825.3712  | 808.3447  | 807.3607       | 708.3828  |           | C    | 749.3828  | 748.3876  |          | 854.4077  | 837.3811  |
| 7  | 44.0495  | 868.4134  | 851.3869  | 850.4029       | 896.4083  | 879.3818  | 878.3978       |           |           | A    | 678.3457  |           |          | 694.3770  | 677.3505  |
| 8  | 102.0550 | 997.4560  | 980.4295  | 979.4454       | 1025.4509 | 1008.4244 | 1007.4404      | 939.4505  |           | E    | 549.3031  | 548.3079  |          | 623.3399  | 606.3134  |
| 9  | 44.0495  | 1068.4931 | 1051.4666 | 1050.4826      | 1096.4880 | 1079.4615 | 1078.4775      |           |           | A    | 478.2660  |           |          | 494.2973  | 477.2708  |
| 10 | 86.0964  | 1181.5772 | 1164.5506 | 1163.5666      | 1209.5721 | 1192.5456 | 1191.5615      | 1153.5459 | 1167.5615 | I    | 365.1819  | 378.2023  | 392.2180 | 423.2602  | 406.2336  |
| 11 | 136.0757 | 1344.6405 | 1327.6140 | 1326.6300      | 1372.6354 | 1355.6089 | 1354.6249      |           |           | Y    | 202.1186  |           |          | 310.1761  | 293.1496  |
| 12 | 101.1073 |           |           |                |           |           |                |           |           | K    | 74.0237   | 73.0284   |          | 147.1128  | 130.0863  |

| Seq    | ya       | yb       | Seq    | ya       | yb       | Seq    | ya       | yb       |
|--------|----------|----------|--------|----------|----------|--------|----------|----------|
| RF     | 276.1819 | 304.1768 | RFV    | 375.2503 | 403.2452 | RFVF   | 522.3187 | 550.3136 |
| RFVFC  | 682.3494 | 710.3443 | FV     | 219.1492 | 247.1441 | FVF    | 366.2176 | 394.2125 |
| FVFC   | 526.2483 | 554.2432 | FVFC   | 597.2854 | 625.2803 | VF     | 219.1492 | 247.1441 |
| VFC    | 379.1798 | 407.1748 | VFCA   | 450.2170 | 478.2119 | VFCAE  | 579.2595 | 607.2545 |
| VFCAEA | 650.2967 | 678.2916 | FC     | 280.1114 | 308.1063 | FCA    | 351.1485 | 379.1435 |
| FCAE   | 480.1911 | 508.1860 | FCAEA  | 551.2282 | 579.2232 | FCAEAI | 664.3123 | 692.3072 |
| CA     | 204.0801 | 232.0750 | CAE    | 333.1227 | 361.1176 | CAEA   | 404.1598 | 432.1547 |
| CAEAI  | 517.2439 | 545.2388 | CAEAIY | 680.3072 | 708.3021 | AE     | 173.0921 | 201.0870 |
| AEA    | 244.1292 | 272.1241 | AEAI   | 357.2132 | 385.2082 | AEAIY  | 520.2766 | 548.2715 |



|                    |          |          |                     |          |          |                      |          |          |
|--------------------|----------|----------|---------------------|----------|----------|----------------------|----------|----------|
| <a href="#">EA</a> | 173.0921 | 201.0870 | <a href="#">EAI</a> | 286.1761 | 314.1710 | <a href="#">EAIY</a> | 449.2395 | 477.2344 |
| <a href="#">AI</a> | 157.1335 | 185.1285 | <a href="#">AIY</a> | 320.1969 | 348.1918 | <a href="#">IY</a>   | 249.1598 | 277.1547 |

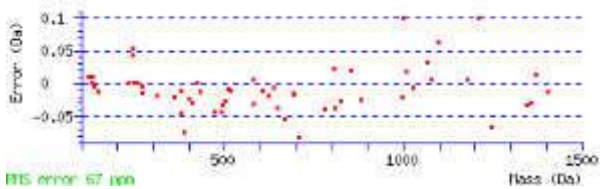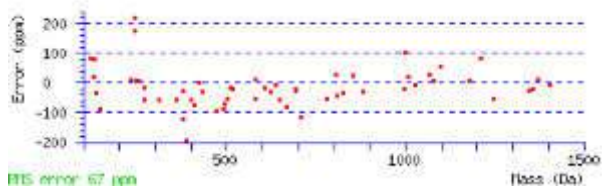

NCBI BLAST search of [DRFVFCAEAIYK](#)  
 (Parameters: blastp, nr protein database, expect=20000, no filter, PAM30)  
 Other BLAST [web gateways](#)

All matches to this query

| Score | Mr(calc)  | Delta  | Sequence                     |
|-------|-----------|--------|------------------------------|
| 52.6  | 1517.7007 | 0.1232 | <a href="#">DRFVMCAEAIYK</a> |
| 52.6  | 1517.7007 | 0.1232 | <a href="#">DRMVFCAEALYK</a> |
| 51.1  | 1517.7337 | 0.0902 | <a href="#">DRFVFCAEAIYK</a> |
| 51.1  | 1517.7337 | 0.0902 | <a href="#">DRFVFCAEAIYK</a> |
| 51.1  | 1517.7337 | 0.0902 | <a href="#">DRFVFCAEAIYK</a> |
| 51.1  | 1517.7337 | 0.0902 | <a href="#">DRFVFCAEAIYK</a> |
| 51.1  | 1517.7337 | 0.0902 | <a href="#">DRFVFCAEAIYK</a> |
| 51.1  | 1517.7337 | 0.0902 | <a href="#">DRFVFCAEAIYK</a> |
| 51.1  | 1517.7337 | 0.0902 | <a href="#">DRFVFCAEAIYK</a> |
| 51.1  | 1517.7337 | 0.0902 | <a href="#">DRFVFCAEAIYK</a> |
| 51.1  | 1517.7337 | 0.0902 | <a href="#">DRFVFCAEAIYK</a> |

Mascot: <http://www.matrixscience.com/>


**Mascot Search Results**
**Peptide View Spot no 96**
MS/MS Fragmentation of **WSPELAAACEIWK**Found in **gi11466795** in **NCBI nr**, ribulose-1,5-bisphosphate carboxylase/oxygenase large subunit [Oryza sativa Japonica Group]

Match to Query 17: 1559.808024 from(1560.815300,1+) intensity(0.0000) index(8)

Title: Label: E11, Spot\_Id: 216641, Peak\_List\_Id: 221257, MSMS Job\_Run\_Id: 21347, Comment:

Data file C:\Documents and Settings\Administrator\Desktop\farah BHU\RAJESH\12-1-13 raj\ppw\_E11\_135997701000.txt

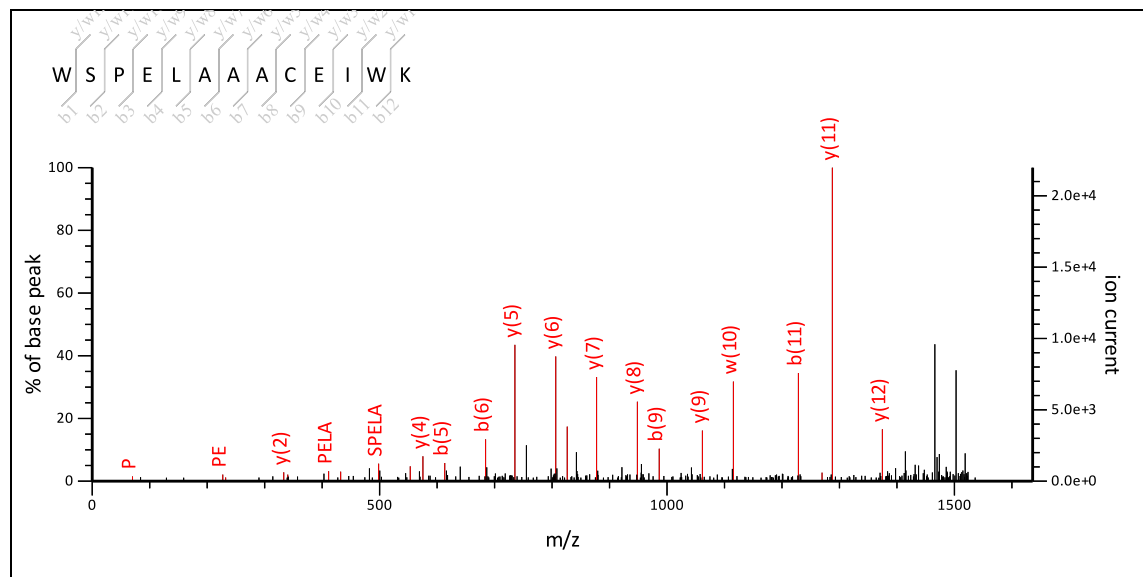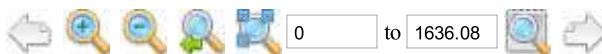Label all possible matches  Label matches used for scoring Monoisotopic mass of neutral peptide  $M_r(\text{calc})$ : 1559.7442

Fixed modifications: Carbamidomethyl (C) (apply to specified residues or termini only)

Ions Score: 74 Expect: 0.00022

Matches : 26/203 fragment ions using 30 most intense peaks ([help](#))

| #  | Immon.   | a         | a <sup>0</sup> | b         | b <sup>0</sup> | d         | d'        | Seq. | v         | w         | w'       | y         | y*        | y <sup>0</sup> | #  |
|----|----------|-----------|----------------|-----------|----------------|-----------|-----------|------|-----------|-----------|----------|-----------|-----------|----------------|----|
| 1  | 159.0917 | 159.0917  |                | 187.0866  |                | 44.0495   |           | W    |           |           |          |           |           |                | 13 |
| 2  | 60.0444  | 246.1237  | 228.1131       | 274.1186  | 256.1081       | 230.1288  |           | S    | 1342.6460 | 1341.6508 |          | 1374.6722 | 1357.6457 | 1356.6616      | 12 |
| 3  | 70.0651  | 343.1765  | 325.1659       | 371.1714  | 353.1608       | 317.1608  |           | P    | 1245.5932 | 1244.5980 |          | 1287.6402 | 1270.6136 | 1269.6296      | 11 |
| 4  | 102.0550 | 472.2191  | 454.2085       | 500.2140  | 482.2034       | 414.2136  |           | E    | 1116.5506 | 1115.5554 |          | 1190.5874 | 1173.5609 | 1172.5769      | 10 |
| 5  | 86.0964  | 585.3031  | 567.2926       | 613.2980  | 595.2875       | 543.2562  |           | L    | 1003.4666 | 1002.4713 |          | 1061.5448 | 1044.5183 | 1043.5343      | 9  |
| 6  | 44.0495  | 656.3402  | 638.3297       | 684.3352  | 666.3246       |           |           | A    | 932.4295  |           |          | 948.4608  | 931.4342  | 930.4502       | 8  |
| 7  | 44.0495  | 727.3774  | 709.3668       | 755.3723  | 737.3617       |           |           | A    | 861.3924  |           |          | 877.4237  | 860.3971  | 859.4131       | 7  |
| 8  | 44.0495  | 798.4145  | 780.4039       | 826.4094  | 808.3988       |           |           | A    | 790.3552  |           |          | 806.3865  | 789.3600  | 788.3760       | 6  |
| 9  | 133.0430 | 958.4451  | 940.4345       | 986.4400  | 968.4295       | 869.4516  |           | C    | 630.3246  | 629.3293  |          | 735.3494  | 718.3229  | 717.3389       | 5  |
| 10 | 102.0550 | 1087.4877 | 1069.4771      | 1115.4826 | 1097.4721      | 1029.4822 |           | E    | 501.2820  | 500.2867  |          | 575.3188  | 558.2922  | 557.3082       | 4  |
| 11 | 86.0964  | 1200.5718 | 1182.5612      | 1228.5667 | 1210.5561      | 1172.5405 | 1186.5561 | I    | 388.1979  | 401.2183  | 415.2340 | 446.2762  | 429.2496  |                | 3  |
| 12 | 159.0917 | 1386.6511 | 1368.6405      | 1414.6460 | 1396.6354      |           |           | W    | 202.1186  |           |          | 333.1921  | 316.1656  |                | 2  |
| 13 | 101.1073 |           |                |           |                |           |           | K    | 74.0237   | 73.0284   |          | 147.1128  | 130.0863  |                | 1  |

| Seq   | ya       | yb       | Seq    | ya       | yb       | Seq     | ya       | yb       |
|-------|----------|----------|--------|----------|----------|---------|----------|----------|
| SP    | 157.0972 | 185.0921 | SPE    | 286.1397 | 314.1347 | SPEL    | 399.2238 | 427.2187 |
| SPELA | 470.2609 | 498.2558 | SPELAA | 541.2980 | 569.2930 | SPELAAA | 612.3352 | 640.3301 |
| PE    | 199.1077 | 227.1026 | PEL    | 312.1918 | 340.1867 | PELA    | 383.2289 | 411.2238 |
| PELAA | 454.2660 | 482.2609 | PELAAA | 525.3031 | 553.2980 | PELAAAC | 685.3338 | 713.3287 |

|               |          |          |               |          |                 |               |                 |                 |
|---------------|----------|----------|---------------|----------|-----------------|---------------|-----------------|-----------------|
| <b>EL</b>     | 215.1390 | 243.1339 | <b>ELA</b>    | 286.1761 | 314.1710        | <b>ELAA</b>   | 357.2132        | 385.2082        |
| <b>ELAAA</b>  | 428.2504 | 456.2453 | <b>ELAAAC</b> | 588.2810 | 616.2759        | <b>LA</b>     | 157.1335        | 185.1285        |
| <b>LAA</b>    | 228.1707 | 256.1656 | <b>LAAA</b>   | 299.2078 | 327.2027        | <b>LAAAC</b>  | 459.2384        | 487.2333        |
| <b>LAAACE</b> | 588.2810 | 616.2759 | <b>AA</b>     | 115.0866 | 143.0815        | <b>AAA</b>    | 186.1237        | 214.1186        |
| <b>AAAC</b>   | 346.1544 | 374.1493 | <b>AAACE</b>  | 475.1969 | 503.1919        | <b>AAACEI</b> | 588.2810        | 616.2759        |
| <b>AA</b>     | 115.0866 | 143.0815 | <b>AAC</b>    | 275.1172 | 303.1122        | <b>AACE</b>   | 404.1598        | <b>432.1547</b> |
| <b>AACEI</b>  | 517.2439 | 545.2388 | <b>AC</b>     | 204.0801 | <b>232.0750</b> | <b>ACE</b>    | <b>333.1227</b> | 361.1176        |
| <b>ACEI</b>   | 446.2068 | 474.2017 | <b>ACEIW</b>  | 632.2861 | 660.2810        | <b>CE</b>     | 262.0856        | 290.0805        |
| <b>CEI</b>    | 375.1697 | 403.1646 | <b>CEIW</b>   | 561.2490 | 589.2439        | <b>EI</b>     | 215.1390        | 243.1339        |
| <b>EIW</b>    | 401.2183 | 429.2132 | <b>IW</b>     | 272.1757 | 300.1707        |               |                 |                 |

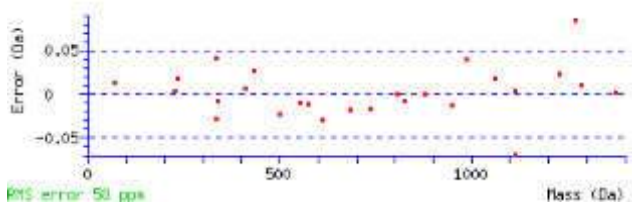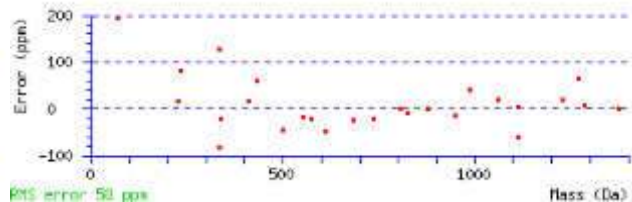

NCBI BLAST search of [WSPELAAACEIWK](#)

(Parameters: blastp, nr protein database, expect=20000, no filter, PAM30)

Other BLAST [web gateways](#)

#### All matches to this query

| Score | Mr(calc)  | Delta  | Sequence                       |
|-------|-----------|--------|--------------------------------|
| 73.7  | 1559.7442 | 0.0638 | <a href="#">WSPEIAAAACEIWK</a> |
| 73.7  | 1559.7442 | 0.0638 | <a href="#">WSPELAAACEIWK</a>  |
| 73.7  | 1559.7442 | 0.0638 | <a href="#">WSPELAAACEIWK</a>  |
| 73.7  | 1559.7442 | 0.0638 | <a href="#">WSPELAAACEIWK</a>  |
| 73.7  | 1559.7442 | 0.0638 | <a href="#">WSPELAAACEIWK</a>  |
| 73.7  | 1559.7442 | 0.0638 | <a href="#">WSPELAAACEIWK</a>  |
| 73.7  | 1559.7442 | 0.0638 | <a href="#">WSPELAAACEIWK</a>  |
| 73.7  | 1559.7442 | 0.0638 | <a href="#">WSPELAAACEIWK</a>  |
| 73.7  | 1559.7442 | 0.0638 | <a href="#">WSPELAAACEIWK</a>  |
| 73.7  | 1559.7442 | 0.0638 | <a href="#">WSPELAAACEIWK</a>  |
| 73.7  | 1559.7442 | 0.0638 | <a href="#">WSPELAAACEIWK</a>  |

Mascot: <http://www.matrixscience.com/>

**MATRIX SCIENCE Mascot Search Results**

**Peptide View Spot no 96**

MS/MS Fragmentation of **SACKWSPELAAACEIWK**

Found in **gi|11466795** in **NCBI**nr, ribulose-1,5-bisphosphate carboxylase/oxygenase large subunit [Oryza sativa Japonica Group]

Match to Query 20: 2006.005524 from(2007.012800,1+) intensity(0.0000) index(10)

Title: Label: E11, Spot\_Id: 216641, Peak\_List\_Id: 221262, MSMS Job\_Run\_Id: 21347, Comment:

Data file C:\Documents and Settings\Administrator\Desktop\farah BHU\RAJESH\12-1-13 rajppw\_E11\_135997701000.txt

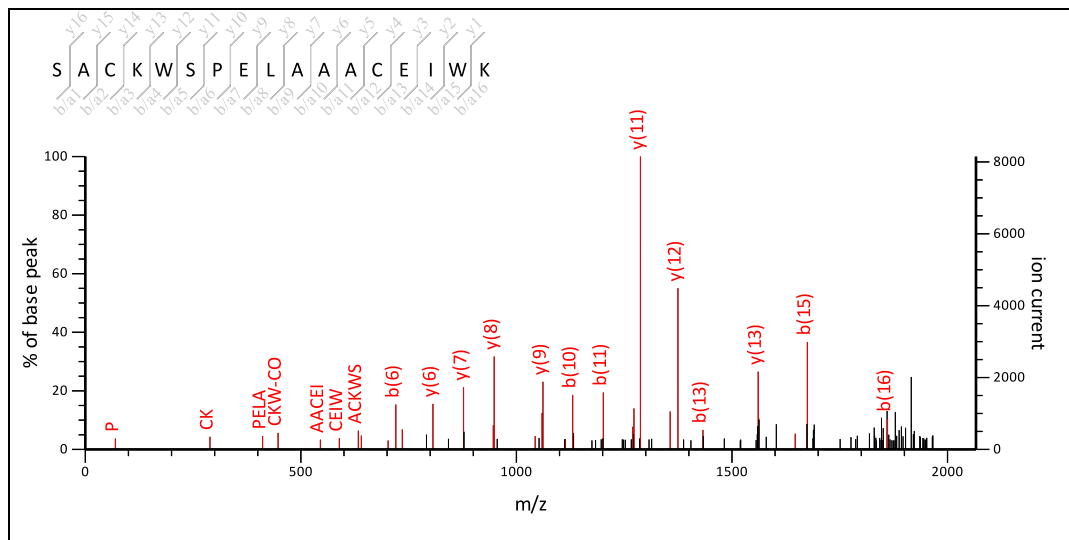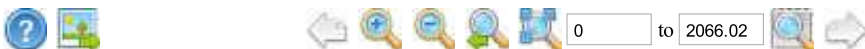

Label all possible matches  Label matches used for scoring

Monoisotopic mass of neutral peptide Mr(calc): 2005.9390

Fixed modifications: Carbamidomethyl (C) (apply to specified residues or termini only)

Ions Score: 84 Expect: 1.5e-05

Matches : 35/305 fragment ions using 47 most intense peaks [\(help\)](#)

| #  | Immon.   | a         | a*        | a <sup>0</sup> | b         | b*        | b <sup>0</sup> | d         | d'        | Seq. | v         | w         | w'       | y         | y*        |
|----|----------|-----------|-----------|----------------|-----------|-----------|----------------|-----------|-----------|------|-----------|-----------|----------|-----------|-----------|
| 1  | 60.0444  | 60.0444   |           | 42.0338        | 88.0393   |           | 70.0287        | 44.0495   |           | S    |           |           |          |           |           |
| 2  | 44.0495  | 131.0815  |           | 113.0709       | 159.0764  |           | 141.0659       |           |           | A    | 1903.8830 |           |          | 1919.9143 | 1902.8877 |
| 3  | 133.0430 | 291.1122  |           | 273.1016       | 319.1071  |           | 301.0965       | 202.1186  |           | C    | 1743.8523 | 1742.8571 |          | 1848.8771 | 1831.8506 |
| 4  | 101.1073 | 419.2071  | 402.1806  | 401.1966       | 447.2020  | 430.1755  | 429.1915       | 362.1493  |           | K    | 1615.7573 | 1614.7621 |          | 1688.8465 | 1671.8199 |
| 5  | 159.0917 | 605.2864  | 588.2599  | 587.2759       | 633.2813  | 616.2548  | 615.2708       |           |           | W    | 1429.6780 |           |          | 1560.7515 | 1543.7250 |
| 6  | 60.0444  | 692.3185  | 675.2919  | 674.3079       | 720.3134  | 703.2868  | 702.3028       | 676.3235  |           | S    | 1342.6460 | 1341.6508 |          | 1374.6722 | 1357.6457 |
| 7  | 70.0651  | 789.3712  | 772.3447  | 771.3607       | 817.3661  | 800.3396  | 799.3556       | 763.3556  |           | P    | 1245.5932 | 1244.5980 |          | 1287.6402 | 1270.6136 |
| 8  | 102.0550 | 918.4138  | 901.3873  | 900.4032       | 946.4087  | 929.3822  | 928.3982       | 860.4083  |           | E    | 1116.5506 | 1115.5554 |          | 1190.5874 | 1173.5609 |
| 9  | 86.0964  | 1031.4979 | 1014.4713 | 1013.4873      | 1059.4928 | 1042.4662 | 1041.4822      | 989.4509  |           | L    | 1003.4666 | 1002.4713 |          | 1061.5448 | 1044.5183 |
| 10 | 44.0495  | 1102.5350 | 1085.5084 | 1084.5244      | 1130.5299 | 1113.5034 | 1112.5193      |           |           | A    | 932.4295  |           |          | 948.4608  | 931.4342  |
| 11 | 44.0495  | 1173.5721 | 1156.5456 | 1155.5615      | 1201.5670 | 1184.5405 | 1183.5565      |           |           | A    | 861.3924  |           |          | 877.4237  | 860.3971  |
| 12 | 44.0495  | 1244.6092 | 1227.5827 | 1226.5987      | 1272.6041 | 1255.5776 | 1254.5936      |           |           | A    | 790.3552  |           |          | 806.3865  | 789.3600  |
| 13 | 133.0430 | 1404.6399 | 1387.6133 | 1386.6293      | 1432.6348 | 1415.6082 | 1414.6242      | 1315.6463 |           | C    | 630.3246  | 629.3293  |          | 735.3494  | 718.3229  |
| 14 | 102.0550 | 1533.6825 | 1516.6559 | 1515.6719      | 1561.6774 | 1544.6508 | 1543.6668      | 1475.6770 |           | E    | 501.2820  | 500.2867  |          | 575.3188  | 558.2922  |
| 15 | 86.0964  | 1646.7665 | 1629.7400 | 1628.7560      | 1674.7614 | 1657.7349 | 1656.7509      | 1618.7352 | 1632.7509 | I    | 388.1979  | 401.2183  | 415.2340 | 446.2762  | 429.2496  |
| 16 | 159.0917 | 1832.8458 | 1815.8193 | 1814.8353      | 1860.8408 | 1843.8142 | 1842.8302      |           |           | W    | 202.1186  |           |          | 333.1921  | 316.1656  |
| 17 | 101.1073 |           |           |                |           |           |                |           |           | K    | 74.0237   | 73.0284   |          | 147.1128  | 130.0863  |

| Seq   | ya       | yb       | Seq   | ya       | yb       | Seq   | ya       | yb       |
|-------|----------|----------|-------|----------|----------|-------|----------|----------|
| AC    | 204.0801 | 232.0750 | ACK   | 332.1751 | 360.1700 | ACKW  | 518.2544 | 546.2493 |
| ACKWS | 605.2864 | 633.2813 | CK    | 261.1380 | 289.1329 | CKW   | 447.2173 | 475.2122 |
| CKWS  | 534.2493 | 562.2442 | CKWSP | 631.3021 | 659.2970 | KW    | 287.1866 | 315.1816 |
| KWS   | 374.2187 | 402.2136 | KWSP  | 471.2714 | 499.2663 | KWSPE | 600.3140 | 628.3089 |

|        |          |          |         |          |          |        |          |          |
|--------|----------|----------|---------|----------|----------|--------|----------|----------|
| WS     | 246.1237 | 274.1186 | WSP     | 343.1765 | 371.1714 | WSPE   | 472.2191 | 500.2140 |
| WSP    | 585.3031 | 613.2980 | WSPELA  | 656.3402 | 684.3352 | SP     | 157.0972 | 185.0921 |
| SPE    | 286.1397 | 314.1347 | SPEL    | 399.2238 | 427.2187 | SPELA  | 470.2609 | 498.2558 |
| SPELAA | 541.2980 | 569.2930 | SPELAAA | 612.3352 | 640.3301 | PE     | 199.1077 | 227.1026 |
| PEL    | 312.1918 | 340.1867 | PELA    | 383.2289 | 411.2238 | PELAA  | 454.2660 | 482.2609 |
| PELAAA | 525.3031 | 553.2980 | PELAAAC | 685.3338 | 713.3287 | EL     | 215.1390 | 243.1339 |
| ELA    | 286.1761 | 314.1710 | ELAA    | 357.2132 | 385.2082 | ELAAA  | 428.2504 | 456.2453 |
| ELAAAC | 588.2810 | 616.2759 | LA      | 157.1335 | 185.1285 | LAA    | 228.1707 | 256.1656 |
| LAAA   | 299.2078 | 327.2027 | LAAAC   | 459.2384 | 487.2333 | LAAACE | 588.2810 | 616.2759 |
| AA     | 115.0866 | 143.0815 | AAA     | 186.1237 | 214.1186 | AAAC   | 346.1544 | 374.1493 |
| AAACE  | 475.1969 | 503.1919 | AAACEI  | 588.2810 | 616.2759 | AA     | 115.0866 | 143.0815 |
| AAC    | 275.1172 | 303.1122 | AACE    | 404.1598 | 432.1547 | AACEI  | 517.2439 | 545.2388 |
| AC     | 204.0801 | 232.0750 | ACE     | 333.1227 | 361.1176 | ACEI   | 446.2068 | 474.2017 |
| ACEIW  | 632.2861 | 660.2810 | CE      | 262.0856 | 290.0805 | CEI    | 375.1697 | 403.1646 |
| CEIW   | 561.2490 | 589.2439 | EI      | 215.1390 | 243.1339 | EIW    | 401.2183 | 429.2132 |
| IW     | 272.1757 | 300.1707 |         |          |          |        |          |          |

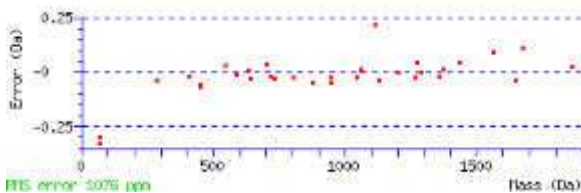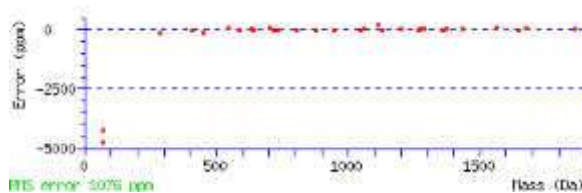

NCBI BLAST search of [SACKWSPELAAACEIWK](#)

(Parameters: blastp, nr protein database, expect=20000, no filter, PAM30)

Other BLAST [web gateways](#)

#### All matches to this query

| Score | Mr(calc)  | Delta   | Sequence                                  |
|-------|-----------|---------|-------------------------------------------|
| 84.1  | 2005.9390 | 0.0666  | <a href="#">SACKWSPELAAACEIWK</a>         |
| 62.1  | 2006.8866 | -0.8811 | <a href="#">SACKWSPELAAACEIWE</a>         |
| 41.2  | 2006.8866 | -0.8811 | <a href="#">EACSWSPELAAACEIWK</a>         |
| 36.8  | 2004.9615 | 1.0441  | <a href="#">ETSKWSPELAAACEIWK</a>         |
| 15.7  | 2006.0334 | -0.0278 | <a href="#">OKTGASFILPASAOHGHEK</a>       |
| 14.8  | 2006.1452 | -0.1397 | <a href="#">TKIVFSSNALLSIPEFLK</a>        |
| 14.4  | 2005.9487 | 0.0569  | <a href="#">MAAAANSSASAAGAGGGSAAAAGLK</a> |
| 11.6  | 2005.9449 | 0.0607  | <a href="#">SGVGCKMEIVPETEQSAK</a>        |
| 11.4  | 2004.9977 | 1.0079  | <a href="#">NSSRSYHIIAASESQSLR</a>        |
| 11.2  | 2005.9390 | 0.0665  | <a href="#">MDLVGTSNVKAWMGYFR</a>         |

Mascot: <http://www.matrixscience.com/>

**MATRIX SCIENCE Mascot Search Results**

**Peptide View Spot no 96**

MS/MS Fragmentation of **GGLDFTKDDENVNSQPFMR**

Found in **gi|11466795** in **NCBIInr**, ribulose-1,5-bisphosphate carboxylase/oxygenase large subunit [Oryza sativa Japonica Group]

Match to Query 24: 2169.069124 from(2170.076400,1+) intensity(0.0000) index(12)

Title: Label: E11, Spot\_Id: 216641, Peak\_List\_Id: 221248, MSMS Job\_Run\_Id: 21347, Comment:

Data file C:\Documents and Settings\Administrator\Desktop\farah BHU\RAJESH\12-1-13 raj\ppw\_E11\_135997701000.txt

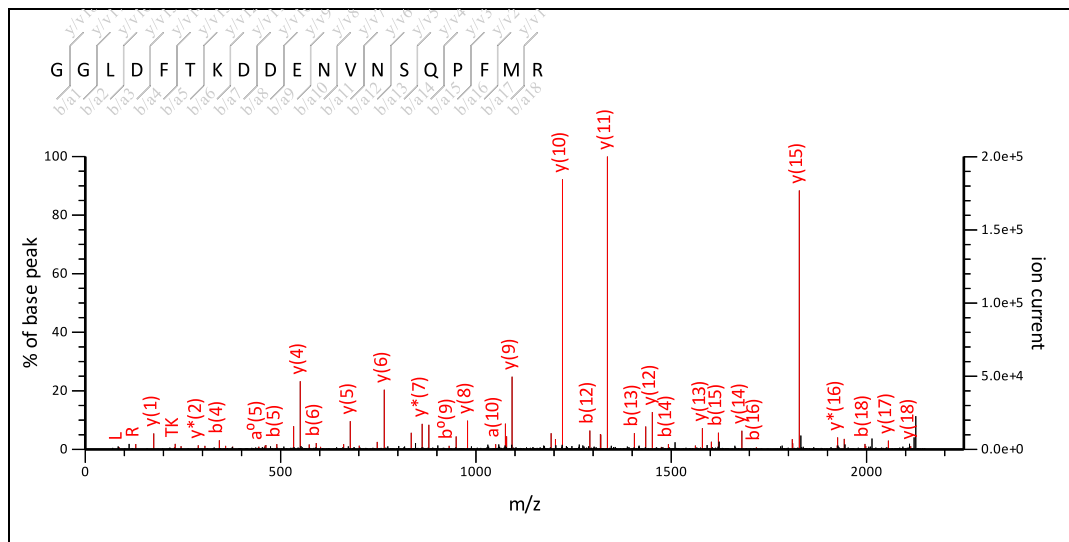

Navigation icons: Home, Back, Forward, Search, etc. Range: 0 to 2249

Label all possible matches  Label matches used for scoring

Monoisotopic mass of neutral peptide Mr(calc): 2168.9797

Fixed modifications: Carbamidomethyl (C) (apply to specified residues or termini only)

Ions Score: 138 Expect: 8e-11

Matches : 72/340 fragment ions using 84 most intense peaks [\(help\)](#)

| #  | Immon.   | a         | a*        | a <sup>0</sup> | b         | b*        | b <sup>0</sup> | d         | d'       | Seq. | v         | w         | w'        | y         | y*        |
|----|----------|-----------|-----------|----------------|-----------|-----------|----------------|-----------|----------|------|-----------|-----------|-----------|-----------|-----------|
| 1  | 30.0338  | 30.0338   |           |                | 58.0287   |           |                | 44.0495   |          | G    |           |           |           |           |           |
| 2  | 30.0338  | 87.0553   |           |                | 115.0502  |           |                |           |          | G    |           |           |           | 2112.9655 | 2095.9389 |
| 3  | 86.0964  | 200.1394  |           |                | 228.1343  |           |                | 158.0924  |          | L    | 1997.8658 | 1996.8705 |           | 2055.9440 | 2038.9175 |
| 4  | 88.0393  | 315.1663  |           | 297.1557       | 343.1612  |           | 325.1506       | 271.1765  |          | D    | 1882.8388 | 1881.8436 |           | 1942.8600 | 1925.8334 |
| 5  | 120.0808 | 462.2347  |           | 444.2241       | 490.2296  |           | 472.2191       |           |          | F    | 1735.7704 |           |           | 1827.8330 | 1810.8065 |
| 6  | 74.0600  | 563.2824  |           | 545.2718       | 591.2773  |           | 573.2667       | 547.2875  | 549.2667 | T    | 1634.7227 | 1647.7431 | 1649.7224 | 1680.7646 | 1663.7381 |
| 7  | 101.1073 | 691.3774  | 674.3508  | 673.3668       | 719.3723  | 702.3457  | 701.3617       | 634.3195  |          | K    | 1506.6278 | 1505.6325 |           | 1579.7169 | 1562.6904 |
| 8  | 88.0393  | 806.4043  | 789.3777  | 788.3937       | 834.3992  | 817.3727  | 816.3886       | 762.4145  |          | D    | 1391.6008 | 1390.6056 |           | 1451.6220 | 1434.5954 |
| 9  | 88.0393  | 921.4312  | 904.4047  | 903.4207       | 949.4262  | 932.3996  | 931.4156       | 877.4414  |          | D    | 1276.5739 | 1275.5786 |           | 1336.5950 | 1319.5685 |
| 10 | 102.0550 | 1050.4738 | 1033.4473 | 1032.4633      | 1078.4687 | 1061.4422 | 1060.4582      | 992.4684  |          | E    | 1147.5313 | 1146.5361 |           | 1221.5681 | 1204.5415 |
| 11 | 87.0553  | 1164.5168 | 1147.4902 | 1146.5062      | 1192.5117 | 1175.4851 | 1174.5011      | 1121.5109 |          | N    | 1033.4884 | 1032.4931 |           | 1092.5255 | 1075.4989 |
| 12 | 72.0808  | 1263.5852 | 1246.5586 | 1245.5746      | 1291.5801 | 1274.5535 | 1273.5695      | 1249.5695 |          | V    | 934.4200  | 947.4404  |           | 978.4826  | 961.4560  |
| 13 | 87.0553  | 1377.6281 | 1360.6016 | 1359.6175      | 1405.6230 | 1388.5965 | 1387.6124      | 1334.6223 |          | N    | 820.3770  | 819.3818  |           | 879.4141  | 862.3876  |
| 14 | 60.0444  | 1464.6601 | 1447.6336 | 1446.6496      | 1492.6550 | 1475.6285 | 1474.6445      | 1448.6652 |          | S    | 733.3450  | 732.3498  |           | 765.3712  | 748.3447  |
| 15 | 101.0709 | 1592.7187 | 1575.6922 | 1574.7081      | 1620.7136 | 1603.6871 | 1602.7031      | 1535.6972 |          | Q    | 605.2864  | 604.2912  |           | 678.3392  | 661.3126  |
| 16 | 70.0651  | 1689.7715 | 1672.7449 | 1671.7609      | 1717.7664 | 1700.7398 | 1699.7558      | 1663.7558 |          | P    | 508.2337  | 507.2384  |           | 550.2806  | 533.2541  |
| 17 | 120.0808 | 1836.8399 | 1819.8133 | 1818.8293      | 1864.8348 | 1847.8082 | 1846.8242      |           |          | F    | 361.1653  |           |           | 453.2279  | 436.2013  |
| 18 | 104.0528 | 1967.8804 | 1950.8538 | 1949.8698      | 1995.8753 | 1978.8487 | 1977.8647      | 1907.8770 |          | M    | 230.1248  | 229.1295  |           | 306.1594  | 289.1329  |
| 19 | 129.1135 |           |           |                |           |           |                |           |          | R    | 74.0237   | 73.0284   |           | 175.1190  | 158.0924  |

| Seq   | ya       | yb       | Seq    | ya       | yb       | Seq  | ya       | yb       |
|-------|----------|----------|--------|----------|----------|------|----------|----------|
| GL    | 143.1179 | 171.1128 | GLD    | 258.1448 | 286.1397 | GLDF | 405.2132 | 433.2082 |
| GLDFT | 506.2609 | 534.2558 | GLDFTK | 634.3559 | 662.3508 | LD   | 201.1234 | 229.1183 |



|               |          |                 |               |          |                 |               |                 |                 |
|---------------|----------|-----------------|---------------|----------|-----------------|---------------|-----------------|-----------------|
| <b>LDL</b>    | 348.1918 | 376.1867        | <b>LDFT</b>   | 449.2395 | 477.2344        | <b>LDFTK</b>  | 577.3344        | 605.3293        |
| <b>LDFTKD</b> | 692.3614 | 720.3563        | <b>DF</b>     | 235.1077 | 263.1026        | <b>DFT</b>    | 336.1554        | 364.1503        |
| <b>DFTK</b>   | 464.2504 | 492.2453        | <b>DFTKD</b>  | 579.2773 | 607.2722        | <b>DFTKDD</b> | 694.3042        | 722.2992        |
| <b>FT</b>     | 221.1285 | 249.1234        | <b>FTK</b>    | 349.2234 | <b>377.2183</b> | <b>FTKD</b>   | 464.2504        | 492.2453        |
| <b>FTKDD</b>  | 579.2773 | 607.2722        | <b>TK</b>     | 202.1550 | <b>230.1499</b> | <b>TKD</b>    | 317.1819        | 345.1769        |
| <b>TKDD</b>   | 432.2089 | <b>460.2038</b> | <b>TKDDE</b>  | 561.2515 | 589.2464        | <b>TKDDEN</b> | 675.2944        | 703.2893        |
| <b>KD</b>     | 216.1343 | 244.1292        | <b>KDD</b>    | 331.1612 | <b>359.1561</b> | <b>KDDE</b>   | <b>460.2038</b> | 488.1987        |
| <b>KDDEN</b>  | 574.2467 | <b>602.2416</b> | <b>KDDENV</b> | 673.3151 | 701.3101        | <b>DD</b>     | 203.0662        | 231.0612        |
| <b>DDE</b>    | 332.1088 | 360.1038        | <b>DDEN</b>   | 446.1518 | 474.1467        | <b>DDENV</b>  | 545.2202        | <b>573.2151</b> |
| <b>DDENVN</b> | 659.2631 | 687.2580        | <b>DE</b>     | 217.0819 | <b>245.0768</b> | <b>DEN</b>    | 331.1248        | <b>359.1197</b> |
| <b>DENV</b>   | 430.1932 | 458.1882        | <b>DENVN</b>  | 544.2362 | 572.2311        | <b>DENVNS</b> | 631.2682        | 659.2631        |
| <b>EN</b>     | 216.0979 | 244.0928        | <b>ENV</b>    | 315.1663 | <b>343.1612</b> | <b>ENVN</b>   | 429.2092        | 457.2041        |
| <b>ENVNS</b>  | 516.2413 | 544.2362        | <b>ENVNSQ</b> | 644.2998 | 672.2947        | <b>NV</b>     | 186.1237        | 214.1186        |
| <b>NVN</b>    | 300.1666 | 328.1615        | <b>NVNS</b>   | 387.1987 | 415.1936        | <b>NVNSQ</b>  | 515.2572        | 543.2522        |
| <b>NVNSQP</b> | 612.3100 | 640.3049        | <b>VN</b>     | 186.1237 | 214.1186        | <b>VNS</b>    | 273.1557        | 301.1506        |
| <b>VNSQ</b>   | 401.2143 | 429.2092        | <b>VNSQP</b>  | 498.2671 | 526.2620        | <b>VNSQPF</b> | 645.3355        | 673.3304        |
| <b>NS</b>     | 174.0873 | 202.0822        | <b>NSQ</b>    | 302.1459 | 330.1408        | <b>NSQP</b>   | 399.1987        | 427.1936        |
| <b>NSQPF</b>  | 546.2671 | 574.2620        | <b>NSQPFM</b> | 677.3076 | 705.3025        | <b>SQ</b>     | 188.1030        | 216.0979        |
| <b>SQP</b>    | 285.1557 | 313.1506        | <b>SQPF</b>   | 432.2241 | <b>460.2191</b> | <b>SQPFM</b>  | 563.2646        | <b>591.2595</b> |
| <b>QP</b>     | 198.1237 | 226.1186        | <b>QPF</b>    | 345.1921 | 373.1870        | <b>QPFM</b>   | 476.2326        | 504.2275        |
| <b>PF</b>     | 217.1335 | <b>245.1285</b> | <b>PFM</b>    | 348.1740 | 376.1689        | <b>FM</b>     | 251.1213        | 279.1162        |

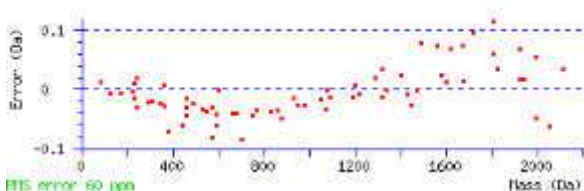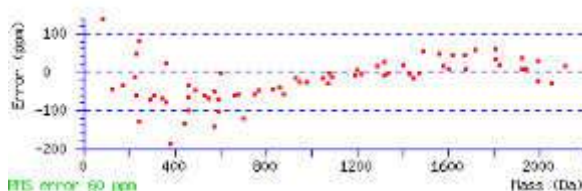

NCBI BLAST search of [GGLDFTKDDENVNSQPFMR](#)

(Parameters: blastp, nr protein database, expect=20000, no filter, PAM30)

Other BLAST [web gateways](#)

All matches to this query

| Score | Mr(calc)  | Delta  | Sequence                            |
|-------|-----------|--------|-------------------------------------|
| 138.1 | 2168.9797 | 0.0894 | <a href="#">GGLDFTKDDENVNSQPFMR</a> |
| 138.1 | 2168.9797 | 0.0894 | <a href="#">GGLDFTKDDENVNSQPFMR</a> |
| 138.1 | 2169.0161 | 0.0531 | <a href="#">GGLDFTKDDENVNSKPFMR</a> |
| 138.1 | 2168.9797 | 0.0894 | <a href="#">GGLDFTKDDENVNSQPFMR</a> |
| 138.1 | 2168.9797 | 0.0894 | <a href="#">GGLDFTKDDENVNSQPFMR</a> |
| 138.1 | 2168.9797 | 0.0894 | <a href="#">GGLDFTKDDENVNSQPFMR</a> |
| 138.1 | 2168.9797 | 0.0894 | <a href="#">GGLDFTKDDENVNSQPFMR</a> |
| 138.1 | 2168.9797 | 0.0894 | <a href="#">GGLDFTKDDENVNSQPFMR</a> |
| 138.1 | 2168.9797 | 0.0894 | <a href="#">GGLDFTKDDENVNSQPFMR</a> |
| 138.1 | 2168.9797 | 0.0894 | <a href="#">GGLDFTKDDENVNSQPFMR</a> |

Mascot: <http://www.matrixscience.com/>



**MATRIX SCIENCE Mascot Search Results**

**Peptide View**

MS/MS Fragmentation of **LTYYTPEYETKDTDILAAFR**

Found in **gi|11466795** in **NCBI**nr, ribulose-1,5-bisphosphate carboxylase/oxygenase large subunit [Oryza sativa Japonica Group]

Match to Query 28: 2409.267424 from(2410.274700,1+) intensity(0.0000) index(14)

Title: Label: E11, Spot\_Id: 216641, Peak\_List\_Id: 221247, MSMS Job\_Run\_Id: 21347, Comment:

Data file C:\Documents and Settings\Administrator\Desktop\farah BHU\RAJESH\12-1-13 raj\ppw\_E11\_135997701000.txt

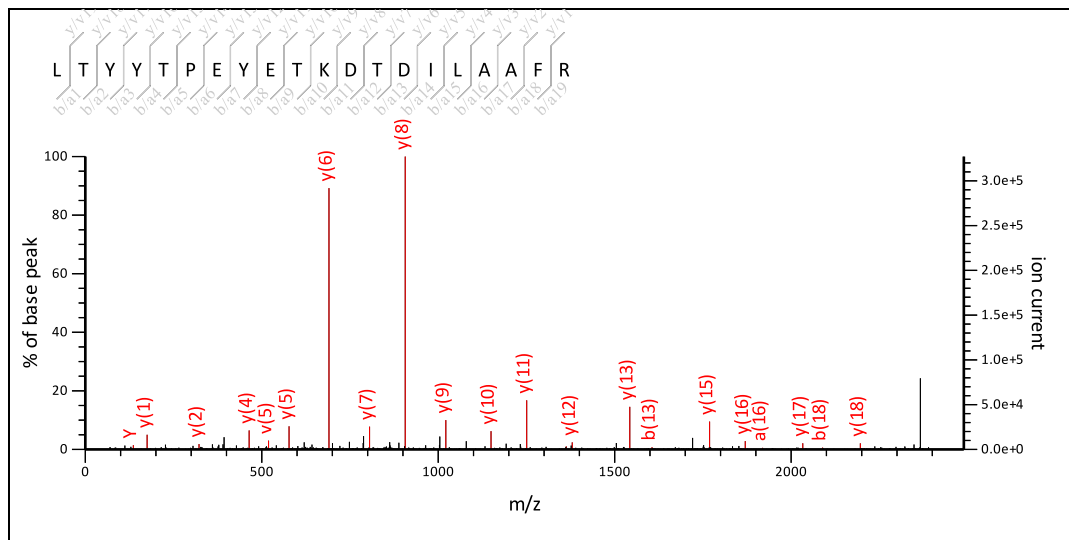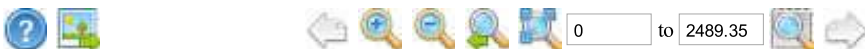

Label all possible matches  Label matches used for scoring

Monoisotopic mass of neutral peptide Mr(calc): 2409.1740

Fixed modifications: Carbamidomethyl (C) (apply to specified residues or termini only)

Ions Score: 162 Expect: 2.5e-13

Matches : 26/356 fragment ions using 24 most intense peaks [\(help\)](#)

| #  | Immon.          | a                | a*        | a <sup>0</sup> | b                | b*        | b <sup>0</sup> | d         | d'        | Seq. | v               | w         | w'        | y                | y*               |
|----|-----------------|------------------|-----------|----------------|------------------|-----------|----------------|-----------|-----------|------|-----------------|-----------|-----------|------------------|------------------|
| 1  | 86.0964         | 86.0964          |           |                | 114.0913         |           |                | 44.0495   |           | L    |                 |           |           |                  |                  |
| 2  | 74.0600         | 187.1441         |           | 169.1335       | 215.1390         |           | 197.1285       | 171.1492  | 173.1285  | T    | 2251.0554       | 2264.0758 | 2266.0550 | 2297.0972        | 2280.0707        |
| 3  | <b>136.0757</b> | 350.2074         |           | 332.1969       | 378.2023         |           | 360.1918       |           |           | Y    | 2087.9920       |           |           | <b>2196.0495</b> | 2179.0230        |
| 4  | <b>136.0757</b> | 513.2708         |           | 495.2602       | 541.2657         |           | 523.2551       |           |           | Y    | 1924.9287       |           |           | <b>2032.9862</b> | 2015.9597        |
| 5  | 74.0600         | 614.3184         |           | 596.3079       | 642.3134         |           | 624.3028       | 598.3235  | 600.3028  | T    | 1823.8810       | 1836.9014 | 1838.8807 | <b>1869.9229</b> | 1852.8963        |
| 6  | 70.0651         | 711.3712         |           | 693.3606       | 739.3661         |           | 721.3556       | 685.3556  |           | P    | 1726.8283       | 1725.8330 |           | <b>1768.8752</b> | 1751.8487        |
| 7  | 102.0550        | 840.4138         |           | 822.4032       | 868.4087         |           | 850.3981       | 782.4083  |           | E    | 1597.7857       | 1596.7904 |           | 1671.8224        | 1654.7959        |
| 8  | <b>136.0757</b> | 1003.4771        |           | 985.4666       | 1031.4720        |           | 1013.4615      |           |           | Y    | 1434.7223       |           |           | <b>1542.7799</b> | 1525.7533        |
| 9  | 102.0550        | 1132.5197        |           | 1114.5092      | 1160.5146        |           | 1142.5041      | 1074.5142 |           | E    | 1305.6797       | 1304.6845 |           | <b>1379.7165</b> | <b>1362.6900</b> |
| 10 | 74.0600         | 1233.5674        |           | 1215.5568      | 1261.5623        |           | 1243.5517      | 1217.5725 | 1219.5517 | T    | 1204.6321       | 1217.6525 | 1219.6317 | <b>1250.6739</b> | 1233.6474        |
| 11 | 101.1073        | 1361.6624        | 1344.6358 | 1343.6518      | 1389.6573        | 1372.6307 | 1371.6467      | 1304.6045 |           | K    | 1076.5371       | 1075.5419 |           | <b>1149.6262</b> | 1132.5997        |
| 12 | 88.0393         | 1476.6893        | 1459.6628 | 1458.6787      | 1504.6842        | 1487.6577 | 1486.6737      | 1432.6995 |           | D    | 961.5102        | 960.5149  |           | <b>1021.5313</b> | 1004.5047        |
| 13 | 74.0600         | 1577.7370        | 1560.7104 | 1559.7264      | <b>1605.7319</b> | 1588.7054 | 1587.7213      | 1561.7421 | 1563.7213 | T    | 860.4625        | 873.4829  | 875.4621  | <b>906.5043</b>  | 889.4778         |
| 14 | 88.0393         | 1692.7639        | 1675.7374 | 1674.7534      | 1720.7588        | 1703.7323 | 1702.7483      | 1648.7741 |           | D    | 745.4355        | 744.4403  |           | <b>805.4567</b>  | 788.4301         |
| 15 | 86.0964         | 1805.8480        | 1788.8214 | 1787.8374      | 1833.8429        | 1816.8164 | 1815.8323      | 1777.8167 | 1791.8323 | I    | 632.3515        | 645.3719  | 659.3875  | <b>690.4297</b>  | 673.4032         |
| 16 | 86.0964         | <b>1918.9321</b> | 1901.9055 | 1900.9215      | 1946.9270        | 1929.9004 | 1928.9164      | 1876.8851 |           | L    | <b>519.2674</b> | 518.2722  |           | <b>577.3457</b>  | 560.3191         |
| 17 | 44.0495         | 1989.9692        | 1972.9426 | 1971.9586      | 2017.9641        | 2000.9375 | 1999.9535      |           |           | A    | 448.2303        |           |           | <b>464.2616</b>  | 447.2350         |
| 18 | 44.0495         | 2061.0063        | 2043.9797 | 2042.9957      | <b>2089.0012</b> | 2071.9746 | 2070.9906      |           |           | A    | 377.1932        |           |           | 393.2245         | 376.1979         |
| 19 | 120.0808        | 2208.0747        | 2191.0481 | 2190.0641      | 2236.0696        | 2219.0431 | 2218.0590      |           |           | F    | 230.1248        |           |           | <b>322.1874</b>  | 305.1608         |
| 20 | 129.1135        |                  |           |                |                  |           |                |           |           | R    | 74.0237         | 73.0284   |           | <b>175.1190</b>  | 158.0924         |

| Seq | ya       | yb       | Seq | ya       | yb       | Seq | ya       | yb       |
|-----|----------|----------|-----|----------|----------|-----|----------|----------|
| TY  | 237.1234 | 265.1183 | TYT | 400.1867 | 428.1816 | TYT | 501.2344 | 529.2293 |

|        |          |          |         |          |          |        |          |          |
|--------|----------|----------|---------|----------|----------|--------|----------|----------|
| TYYP   | 598.2871 | 626.2821 | YY      | 299.1390 | 327.1339 | YYT    | 400.1867 | 428.1816 |
| YYTP   | 497.2395 | 525.2344 | YYTPE   | 626.2821 | 654.2770 | YT     | 237.1234 | 265.1183 |
| YTP    | 334.1761 | 362.1710 | YTPE    | 463.2187 | 491.2136 | YTPEY  | 626.2821 | 654.2770 |
| TP     | 171.1128 | 199.1077 | TPE     | 300.1554 | 328.1503 | TPEY   | 463.2187 | 491.2136 |
| TPEYE  | 592.2613 | 620.2562 | TPEYET  | 693.3090 | 721.3039 | PE     | 199.1077 | 227.1026 |
| PEY    | 362.1710 | 390.1660 | PEYE    | 491.2136 | 519.2086 | PEYET  | 592.2613 | 620.2562 |
| EY     | 265.1183 | 293.1132 | EYE     | 394.1609 | 422.1558 | EYET   | 495.2086 | 523.2035 |
| EYETK  | 623.3035 | 651.2984 | YE      | 265.1183 | 293.1132 | YET    | 366.1660 | 394.1609 |
| YETK   | 494.2609 | 522.2558 | YETKD   | 609.2879 | 637.2828 | ET     | 203.1026 | 231.0975 |
| ETK    | 331.1976 | 359.1925 | ETKD    | 446.2245 | 474.2195 | ETKDT  | 547.2722 | 575.2671 |
| ETKDTD | 662.2992 | 690.2941 | TK      | 202.1550 | 230.1499 | TKD    | 317.1819 | 345.1769 |
| TKDT   | 418.2296 | 446.2245 | TKDTD   | 533.2566 | 561.2515 | TKDTDI | 646.3406 | 674.3355 |
| KD     | 216.1343 | 244.1292 | KDT     | 317.1819 | 345.1769 | KDTD   | 432.2089 | 460.2038 |
| KDTDI  | 545.2930 | 573.2879 | KDTDIL  | 658.3770 | 686.3719 | DT     | 189.0870 | 217.0819 |
| DTD    | 304.1139 | 332.1088 | DTDIL   | 417.1980 | 445.1929 | DTDIL  | 530.2821 | 558.2770 |
| DTDILA | 601.3192 | 629.3141 | DTDILAA | 672.3563 | 700.3512 | TD     | 189.0870 | 217.0819 |
| TDI    | 302.1710 | 330.1660 | TDIL    | 415.2551 | 443.2500 | TDILA  | 486.2922 | 514.2871 |
| TDILAA | 557.3293 | 585.3243 | DI      | 201.1234 | 229.1183 | DIL    | 314.2074 | 342.2023 |
| DILA   | 385.2445 | 413.2395 | DILAA   | 456.2817 | 484.2766 | DILAAF | 603.3501 | 631.3450 |
| IL     | 199.1805 | 227.1754 | ILA     | 270.2176 | 298.2125 | ILAA   | 341.2547 | 369.2496 |
| ILAAF  | 488.3231 | 516.3180 | LA      | 157.1335 | 185.1285 | LAA    | 228.1707 | 256.1656 |
| LAAF   | 375.2391 | 403.2340 | AA      | 115.0866 | 143.0815 | AAF    | 262.1550 | 290.1499 |
| AF     | 191.1179 | 219.1128 |         |          |          |        |          |          |

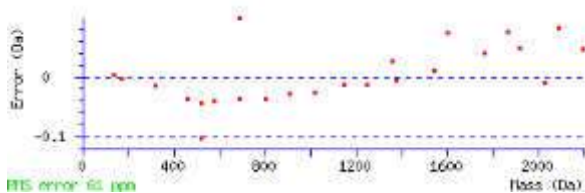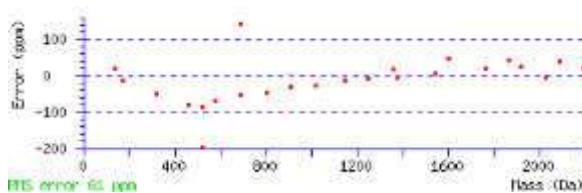

NCBI BLAST search of [LTYYPTEYETKDTDILAAFR](#)  
 (Parameters: blastp, nr protein database, expect=20000, no filter, PAM30)  
 Other BLAST [web gateways](#)

All matches to this query

| Score | Mr(calc)  | Delta  | Sequence                             |
|-------|-----------|--------|--------------------------------------|
| 161.7 | 2408.6820 | 0.5854 | <a href="#">LTYYPTEYETKDTBILAAFR</a> |
| 161.7 | 2409.1740 | 0.0934 | <a href="#">LTYYPTEYETKDTDILAAFR</a> |
| 161.7 | 2409.1740 | 0.0934 | <a href="#">LTYYPTEYETKDTDILAAFR</a> |
| 161.7 | 2408.6820 | 0.5854 | <a href="#">LTYYPTEYETKDTBILAAFR</a> |
| 161.7 | 2409.1740 | 0.0934 | <a href="#">LTYYPTEYETKDTDILAAFR</a> |
| 161.7 | 2409.1740 | 0.0934 | <a href="#">LTYYPTEYETKDTDILAAFR</a> |
| 161.7 | 2409.1740 | 0.0934 | <a href="#">LTYYPTEYETKDTDILAAFR</a> |
| 161.7 | 2409.1740 | 0.0934 | <a href="#">LTYYPTEYETKDTDILAAFR</a> |
| 161.7 | 2409.1740 | 0.0934 | <a href="#">LTYYPTEYETKDTDILAAFR</a> |
| 161.7 | 2409.1740 | 0.0934 | <a href="#">LTYYPTEYETKDTDILAAFR</a> |
| 161.7 | 2409.1740 | 0.0934 | <a href="#">LTYYPTEYETKDTDILAAFR</a> |
| 161.7 | 2409.1740 | 0.0934 | <a href="#">LTYYPTEYETKDTDILAAFR</a> |

Mascot: <http://www.matrixscience.com/>

**MATRIX SCIENCE Mascot Search Results**

**Peptide View Spot no 96**

MS/MS Fragmentation of **VTPQPGVPPEEAGAAVAESSTGTWTTVWTDGLTSLDR**

Found in **gi|11466795** in **NCBI**nr, ribulose-1,5-bisphosphate carboxylase/oxygenase large subunit [Oryza sativa Japonica Group]

Match to Query 36: 3854.980224 from(3855.987500,1+) intensity(0.0000) index(17)

Title: Label: E11, Spot\_Id: 216641, Peak\_List\_Id: 221253, MSMS Job\_Run\_Id: 21347, Comment:

Data file C:\Documents and Settings\Administrator\Desktop\farah BHU\RAJESH\12-1-13 rajppw\_E11\_135997701000.txt

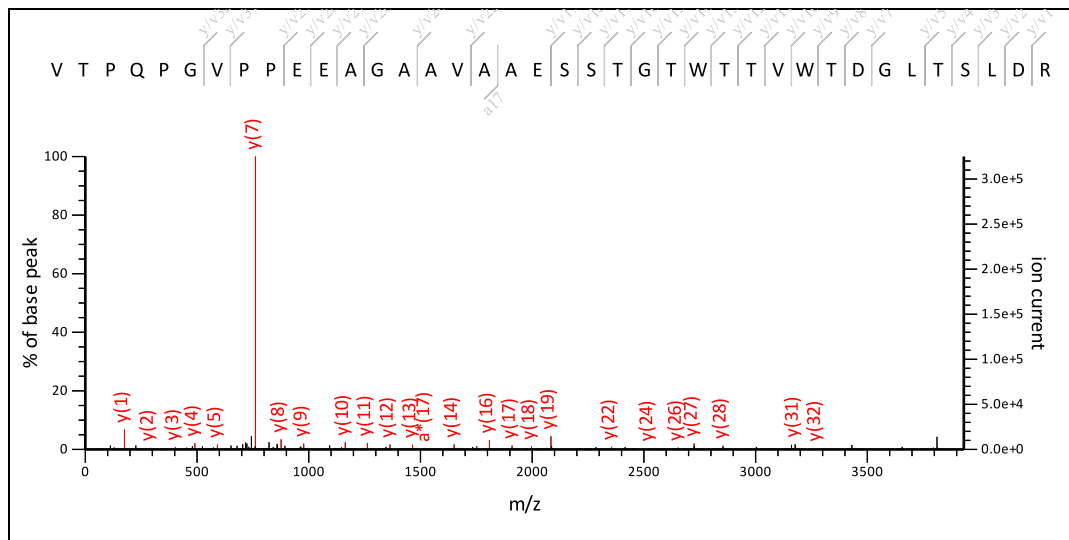

Navigation icons: Home, Back, Forward, Search, Print, Refresh. Search range: 0 to 3931.96.

Label all possible matches  Label matches used for scoring

Monoisotopic mass of neutral peptide Mr(calc): 3853.8647

Fixed modifications: Carbamidomethyl (C) (apply to specified residues or termini only)

Ions Score: 208 Expect: 3.6e-18

Matches : 31/837 fragment ions using 38 most intense peaks [\(help\)](#)

| #  | Immon.   | a         | a*        | a <sup>0</sup> | b         | b*        | b <sup>0</sup> | d         | d'        | Seq. | v         | w         | w'        | y         | y*        |
|----|----------|-----------|-----------|----------------|-----------|-----------|----------------|-----------|-----------|------|-----------|-----------|-----------|-----------|-----------|
| 1  | 72.0808  | 72.0808   |           |                | 100.0757  |           |                | 44.0495   |           | V    |           |           |           |           |           |
| 2  | 74.0600  | 173.1285  |           | 155.1179       | 201.1234  |           | 183.1128       | 157.1335  | 159.1128  | T    | 3709.7616 | 3722.7820 | 3724.7613 | 3755.8035 | 3738.7770 |
| 3  | 70.0651  | 270.1812  |           | 252.1707       | 298.1761  |           | 280.1656       | 244.1656  |           | P    | 3612.7089 | 3611.7136 |           | 3654.7558 | 3637.7293 |
| 4  | 101.0709 | 398.2398  | 381.2132  | 380.2292       | 426.2347  | 409.2082  | 408.2241       | 341.2183  |           | Q    | 3484.6503 | 3483.6551 |           | 3557.7031 | 3540.6765 |
| 5  | 70.0651  | 495.2926  | 478.2660  | 477.2820       | 523.2875  | 506.2609  | 505.2769       | 469.2769  |           | P    | 3387.5975 | 3386.6023 |           | 3429.6445 | 3412.6179 |
| 6  | 30.0338  | 552.3140  | 535.2875  | 534.3035       | 580.3089  | 563.2824  | 562.2984       |           |           | G    |           |           |           | 3332.5917 | 3315.5652 |
| 7  | 72.0808  | 651.3824  | 634.3559  | 633.3719       | 679.3774  | 662.3508  | 661.3668       | 637.3668  |           | V    | 3231.5077 | 3244.5281 |           | 3275.5703 | 3258.5437 |
| 8  | 70.0651  | 748.4352  | 731.4087  | 730.4246       | 776.4301  | 759.4036  | 758.4196       | 722.4196  |           | P    | 3134.4549 | 3133.4596 |           | 3176.5018 | 3159.4753 |
| 9  | 70.0651  | 845.4880  | 828.4614  | 827.4774       | 873.4829  | 856.4563  | 855.4723       | 819.4723  |           | P    | 3037.4021 | 3036.4069 |           | 3079.4491 | 3062.4225 |
| 10 | 102.0550 | 974.5306  | 957.5040  | 956.5200       | 1002.5255 | 985.4989  | 984.5149       | 916.5251  |           | E    | 2908.3595 | 2907.3643 |           | 2982.3963 | 2965.3698 |
| 11 | 102.0550 | 1103.5732 | 1086.5466 | 1085.5626      | 1131.5681 | 1114.5415 | 1113.5575      | 1045.5677 |           | E    | 2779.3169 | 2778.3217 |           | 2853.3537 | 2836.3272 |
| 12 | 44.0495  | 1174.6103 | 1157.5837 | 1156.5997      | 1202.6052 | 1185.5786 | 1184.5946      |           |           | A    | 2708.2798 |           |           | 2724.3111 | 2707.2846 |
| 13 | 30.0338  | 1231.6317 | 1214.6052 | 1213.6212      | 1259.6266 | 1242.6001 | 1241.6161      |           |           | G    |           |           |           | 2653.2740 | 2636.2475 |
| 14 | 44.0495  | 1302.6688 | 1285.6423 | 1284.6583      | 1330.6638 | 1313.6372 | 1312.6532      |           |           | A    | 2580.2213 |           |           | 2596.2526 | 2579.2260 |
| 15 | 44.0495  | 1373.7060 | 1356.6794 | 1355.6954      | 1401.7009 | 1384.6743 | 1383.6903      |           |           | A    | 2509.1841 |           |           | 2525.2154 | 2508.1889 |
| 16 | 72.0808  | 1472.7744 | 1455.7478 | 1454.7638      | 1500.7693 | 1483.7427 | 1482.7587      | 1458.7587 |           | V    | 2410.1157 | 2423.1361 |           | 2454.1783 | 2437.1518 |
| 17 | 44.0495  | 1543.8115 | 1526.7849 | 1525.8009      | 1571.8064 | 1554.7799 | 1553.7958      |           |           | A    | 2339.0786 |           |           | 2355.1099 | 2338.0834 |
| 18 | 44.0495  | 1614.8486 | 1597.8221 | 1596.8380      | 1642.8435 | 1625.8170 | 1624.8329      |           |           | A    | 2268.0415 |           |           | 2284.0728 | 2267.0462 |
| 19 | 102.0550 | 1743.8912 | 1726.8646 | 1725.8806      | 1771.8861 | 1754.8596 | 1753.8755      | 1685.8857 |           | E    | 2138.9989 | 2138.0037 |           | 2213.0357 | 2196.0091 |
| 20 | 60.0444  | 1830.9232 | 1813.8967 | 1812.9127      | 1858.9181 | 1841.8916 | 1840.9076      | 1814.9283 |           | S    | 2051.9669 | 2050.9716 |           | 2083.9931 | 2066.9665 |
| 21 | 60.0444  | 1917.9552 | 1900.9287 | 1899.9447      | 1945.9502 | 1928.9236 | 1927.9396      | 1901.9603 |           | S    | 1964.9348 | 1963.9396 |           | 1996.9611 | 1979.9345 |
| 22 | 74.0600  | 2019.0029 | 2001.9764 | 2000.9924      | 2046.9978 | 2029.9713 | 2028.9873      | 2003.0080 | 2004.9873 | T    | 1863.8872 | 1876.9076 | 1878.8868 | 1909.9290 | 1892.9025 |

|    |          |           |           |           |           |           |           |           |           |          |           |           |           |  |  |  |  |  |          |  |  |  |  |  |  |  |  |  |                  |                  |                 |          |   |
|----|----------|-----------|-----------|-----------|-----------|-----------|-----------|-----------|-----------|----------|-----------|-----------|-----------|--|--|--|--|--|----------|--|--|--|--|--|--|--|--|--|------------------|------------------|-----------------|----------|---|
| 23 | 30.0338  | 2076.0244 | 2058.9978 | 2058.0138 | 2104.0193 | 2086.9928 | 2086.0087 |           |           |          |           |           |           |  |  |  |  |  | <b>G</b> |  |  |  |  |  |  |  |  |  | <b>1808.8814</b> | 1791.8548        | 17              |          |   |
| 24 | 74.0600  | 2177.0721 | 2160.0455 | 2159.0615 | 2205.0670 | 2188.0404 | 2187.0564 | 2161.0772 | 2163.0564 | <b>T</b> | 1705.8180 | 1718.8384 | 1720.8177 |  |  |  |  |  |          |  |  |  |  |  |  |  |  |  | <b>1751.8599</b> | 1734.8333        | 17              |          |   |
| 25 | 159.0917 | 2363.1514 | 2346.1248 | 2345.1408 | 2391.1463 | 2374.1197 | 2373.1357 |           |           |          | <b>W</b>  | 1519.7387 |           |  |  |  |  |  |          |  |  |  |  |  |  |  |  |  |                  | <b>1650.8122</b> | 1633.7857       | 16       |   |
| 26 | 74.0600  | 2464.1991 | 2447.1725 | 2446.1885 | 2492.1940 | 2475.1674 | 2474.1834 | 2448.2041 | 2450.1834 | <b>T</b> | 1418.6910 | 1431.7114 | 1433.6907 |  |  |  |  |  |          |  |  |  |  |  |  |  |  |  |                  | <b>1464.7329</b> | 1447.7064       | 14       |   |
| 27 | 74.0600  | 2565.2467 | 2548.2202 | 2547.2362 | 2593.2417 | 2576.2151 | 2575.2311 | 2549.2518 | 2551.2311 | <b>T</b> | 1317.6434 | 1330.6638 | 1332.6430 |  |  |  |  |  |          |  |  |  |  |  |  |  |  |  |                  | <b>1363.6852</b> | 1346.6587       | 13       |   |
| 28 | 72.0808  | 2664.3152 | 2647.2886 | 2646.3046 | 2692.3101 | 2675.2835 | 2674.2995 | 2650.2995 |           |          | <b>V</b>  | 1218.5749 | 1231.5953 |  |  |  |  |  |          |  |  |  |  |  |  |  |  |  |                  | <b>1262.6375</b> | 1245.6110       | 12       |   |
| 29 | 159.0917 | 2850.3945 | 2833.3679 | 2832.3839 | 2878.3894 | 2861.3628 | 2860.3788 |           |           |          | <b>W</b>  | 1032.4956 |           |  |  |  |  |  |          |  |  |  |  |  |  |  |  |  |                  | <b>1163.5691</b> | 1146.5426       | 11       |   |
| 30 | 74.0600  | 2951.4421 | 2934.4156 | 2933.4316 | 2979.4371 | 2962.4105 | 2961.4265 | 2935.4472 | 2937.4265 | <b>T</b> | 931.4480  | 944.4684  | 946.4476  |  |  |  |  |  |          |  |  |  |  |  |  |  |  |  |                  | <b>977.4898</b>  | 960.4633        | 9        |   |
| 31 | 88.0393  | 3066.4691 | 3049.4425 | 3048.4585 | 3094.4640 | 3077.4375 | 3076.4534 | 3022.4793 |           |          | <b>D</b>  | 816.4210  | 815.4258  |  |  |  |  |  |          |  |  |  |  |  |  |  |  |  |                  | <b>876.4421</b>  | 859.4156        | 8        |   |
| 32 | 30.0338  | 3123.4906 | 3106.4640 | 3105.4800 | 3151.4855 | 3134.4589 | 3133.4749 |           |           |          | <b>G</b>  |           |           |  |  |  |  |  |          |  |  |  |  |  |  |  |  |  |                  |                  | <b>761.4152</b> | 744.3886 | 7 |
| 33 | 86.0964  | 3236.5746 | 3219.5481 | 3218.5641 | 3264.5695 | 3247.5430 | 3246.5590 | 3194.5277 |           |          | <b>L</b>  | 646.3155  | 645.3202  |  |  |  |  |  |          |  |  |  |  |  |  |  |  |  |                  |                  | 704.3937        | 687.3672 | 6 |
| 34 | 74.0600  | 3337.6223 | 3320.5957 | 3319.6117 | 3365.6172 | 3348.5907 | 3347.6066 | 3321.6274 | 3323.6066 | <b>T</b> | 545.2678  | 558.2882  | 560.2675  |  |  |  |  |  |          |  |  |  |  |  |  |  |  |  |                  | <b>591.3097</b>  | 574.2831        | 5        |   |
| 35 | 60.0444  | 3424.6543 | 3407.6278 | 3406.6438 | 3452.6492 | 3435.6227 | 3434.6387 | 3408.6594 |           |          | <b>S</b>  | 458.2358  | 457.2405  |  |  |  |  |  |          |  |  |  |  |  |  |  |  |  |                  |                  | <b>490.2620</b> | 473.2354 | 4 |
| 36 | 86.0964  | 3537.7384 | 3520.7118 | 3519.7278 | 3565.7333 | 3548.7068 | 3547.7227 | 3495.6914 |           |          | <b>L</b>  | 345.1517  | 344.1565  |  |  |  |  |  |          |  |  |  |  |  |  |  |  |  |                  |                  | <b>403.2300</b> | 386.2034 | 3 |
| 37 | 88.0393  | 3652.7653 | 3635.7388 | 3634.7548 | 3680.7602 | 3663.7337 | 3662.7497 | 3608.7755 |           |          | <b>D</b>  | 230.1248  | 229.1295  |  |  |  |  |  |          |  |  |  |  |  |  |  |  |  |                  |                  | <b>290.1459</b> | 273.1193 | 2 |
| 38 | 129.1135 |           |           |           |           |           |           |           |           |          | <b>R</b>  | 74.0237   | 73.0284   |  |  |  |  |  |          |  |  |  |  |  |  |  |  |  |                  |                  | <b>175.1190</b> | 158.0924 | 1 |

| Seq      | ya       | yb       | Seq      | ya       | yb       | Seq      | ya       | yb       |
|----------|----------|----------|----------|----------|----------|----------|----------|----------|
| TP       | 171.1128 | 199.1077 | TPQ      | 299.1714 | 327.1663 | TPQP     | 396.2241 | 424.2191 |
| TPQPG    | 453.2456 | 481.2405 | TPQPGV   | 552.3140 | 580.3089 | TPQPGVP  | 649.3668 | 677.3617 |
| PQ       | 198.1237 | 226.1186 | PQP      | 295.1765 | 323.1714 | PQPG     | 352.1979 | 380.1928 |
| PQPGV    | 451.2663 | 479.2613 | PQPGVP   | 548.3191 | 576.3140 | PQPGVPP  | 645.3719 | 673.3668 |
| QP       | 198.1237 | 226.1186 | QPG      | 255.1452 | 283.1401 | QPGV     | 354.2136 | 382.2085 |
| QPGVP    | 451.2663 | 479.2613 | QPGVPP   | 548.3191 | 576.3140 | QPGVPPE  | 677.3617 | 705.3566 |
| PG       | 127.0866 | 155.0815 | PGV      | 226.1550 | 254.1499 | PGVP     | 323.2078 | 351.2027 |
| PGVPP    | 420.2605 | 448.2554 | PGVPPE   | 549.3031 | 577.2980 | PGVPPEE  | 678.3457 | 706.3406 |
| GV       | 129.1022 | 157.0972 | GVP      | 226.1550 | 254.1499 | GVPP     | 323.2078 | 351.2027 |
| GVPEE    | 452.2504 | 480.2453 | GVPEE    | 581.2930 | 609.2879 | GVPEEA   | 652.3301 | 680.3250 |
| VP       | 169.1335 | 197.1285 | VPP      | 266.1863 | 294.1812 | VPPE     | 395.2289 | 423.2238 |
| VPPEE    | 524.2715 | 552.2664 | VPPEEA   | 595.3086 | 623.3035 | VPPEEAG  | 652.3301 | 680.3250 |
| PP       | 167.1179 | 195.1128 | PPE      | 296.1605 | 324.1554 | PPEE     | 425.2031 | 453.1980 |
| PPEEA    | 496.2402 | 524.2351 | PPEEAG   | 553.2617 | 581.2566 | PPEEAGA  | 624.2988 | 652.2937 |
| PPEEAGAA | 695.3359 | 723.3308 | PE       | 199.1077 | 227.1026 | PEE      | 328.1503 | 356.1452 |
| PEEA     | 399.1874 | 427.1823 | PEEAG    | 456.2089 | 484.2038 | PEEAGA   | 527.2460 | 555.2409 |
| PEEAGAA  | 598.2831 | 626.2780 | PEEAGAAV | 697.3515 | 725.3464 | EE       | 231.0975 | 259.0925 |
| EEA      | 302.1347 | 330.1296 | EEAG     | 359.1561 | 387.1510 | EEAGA    | 430.1932 | 458.1882 |
| EEAGAA   | 501.2304 | 529.2253 | EEAGAAV  | 600.2988 | 628.2937 | EEAGAAVA | 671.3359 | 699.3308 |
| EA       | 173.0921 | 201.0870 | EAG      | 230.1135 | 258.1084 | EAGA     | 301.1506 | 329.1456 |
| EAGAA    | 372.1878 | 400.1827 | EAGAAV   | 471.2562 | 499.2511 | EAGAAVA  | 542.2933 | 570.2882 |
| EAGAAVA  | 613.3304 | 641.3253 | AG       | 101.0709 | 129.0659 | AGA      | 172.1081 | 200.1030 |
| AGAA     | 243.1452 | 271.1401 | AGAAV    | 342.2136 | 370.2085 | AGAAVA   | 413.2507 | 441.2456 |
| AGAAVA   | 484.2878 | 512.2827 | AGAAVAE  | 613.3304 | 641.3253 | GA       | 101.0709 | 129.0659 |
| GAA      | 172.1081 | 200.1030 | GAAV     | 271.1765 | 299.1714 | GAAVA    | 342.2136 | 370.2085 |
| GAAVAA   | 413.2507 | 441.2456 | GAAVAAE  | 542.2933 | 570.2882 | GAAVAAES | 629.3253 | 657.3202 |
| AA       | 115.0866 | 143.0815 | AAV      | 214.1550 | 242.1499 | AAVA     | 285.1921 | 313.1870 |
| AAVAA    | 356.2292 | 384.2241 | AAVAE    | 485.2718 | 513.2667 | AAVAEES  | 572.3039 | 600.2988 |
| AAVAAESS | 659.3359 | 687.3308 | AV       | 143.1179 | 171.1128 | AVA      | 214.1550 | 242.1499 |
| AVAA     | 285.1921 | 313.1870 | AVAE     | 414.2347 | 442.2296 | AVAEES   | 501.2667 | 529.2617 |
| AVAEES   | 588.2988 | 616.2937 | AVAEESST | 689.3464 | 717.3414 | VA       | 143.1179 | 171.1128 |
| VAA      | 214.1550 | 242.1499 | VAAE     | 343.1976 | 371.1925 | VAAES    | 430.2296 | 458.2245 |
| VAAESS   | 517.2617 | 545.2566 | VAAESST  | 618.3093 | 646.3042 | VAAESSTG | 675.3308 | 703.3257 |
| AA       | 115.0866 | 143.0815 | AAE      | 244.1292 | 272.1241 | AAES     | 331.1612 | 359.1561 |
| AAESS    | 418.1932 | 446.1882 | AAESST   | 519.2409 | 547.2358 | AAESSTG  | 576.2624 | 604.2573 |
| AAESSTGT | 677.3101 | 705.3050 | AE       | 173.0921 | 201.0870 | AES      | 260.1241 | 288.1190 |
| AESS     | 347.1561 | 375.1510 | AESST    | 448.2038 | 476.1987 | AESSTG   | 505.2253 | 533.2202 |
| AESSTGT  | 606.2729 | 634.2679 | ES       | 189.0870 | 217.0819 | ESS      | 276.1190 | 304.1139 |

|         |          |          |        |          |          |         |          |          |
|---------|----------|----------|--------|----------|----------|---------|----------|----------|
| ESST    | 377.1667 | 405.1616 | ESSTG  | 434.1882 | 462.1831 | ESSTGT  | 535.2358 | 563.2307 |
| SS      | 147.0764 | 175.0713 | SST    | 248.1241 | 276.1190 | SSTG    | 305.1456 | 333.1405 |
| SSTGT   | 406.1932 | 434.1882 | SSTGTW | 592.2726 | 620.2675 | SSTGTWT | 693.3202 | 721.3151 |
| ST      | 161.0921 | 189.0870 | STG    | 218.1135 | 246.1084 | STGT    | 319.1612 | 347.1561 |
| STGTW   | 505.2405 | 533.2354 | STGTWT | 606.2882 | 634.2831 | TG      | 131.0815 | 159.0764 |
| TGT     | 232.1292 | 260.1241 | TGTW   | 418.2085 | 446.2034 | TGTWT   | 519.2562 | 547.2511 |
| TGTWTT  | 620.3039 | 648.2988 | GT     | 131.0815 | 159.0764 | GTW     | 317.1608 | 345.1557 |
| GTWT    | 418.2085 | 446.2034 | GTWTT  | 519.2562 | 547.2511 | GTWTTV  | 618.3246 | 646.3195 |
| TW      | 260.1394 | 288.1343 | TWT    | 361.1870 | 389.1819 | TWTT    | 462.2347 | 490.2296 |
| TWTTV   | 561.3031 | 589.2980 | WT     | 260.1394 | 288.1343 | WTT     | 361.1870 | 389.1819 |
| WTTV    | 460.2554 | 488.2504 | WTTVW  | 646.3348 | 674.3297 | TT      | 175.1077 | 203.1026 |
| TTV     | 274.1761 | 302.1710 | TTVW   | 460.2554 | 488.2504 | TTVWT   | 561.3031 | 589.2980 |
| TTVWTD  | 676.3301 | 704.3250 | TV     | 173.1285 | 201.1234 | TVW     | 359.2078 | 387.2027 |
| TVWT    | 460.2554 | 488.2504 | TVWTD  | 575.2824 | 603.2773 | TVWTDG  | 632.3039 | 660.2988 |
| VW      | 258.1601 | 286.1550 | VWT    | 359.2078 | 387.2027 | VWTD    | 474.2347 | 502.2296 |
| VWTDG   | 531.2562 | 559.2511 | VWTDGL | 644.3402 | 672.3352 | WT      | 260.1394 | 288.1343 |
| WTD     | 375.1663 | 403.1612 | WTDG   | 432.1878 | 460.1827 | WTDGL   | 545.2718 | 573.2667 |
| WTDGLT  | 646.3195 | 674.3144 | TD     | 189.0870 | 217.0819 | TDG     | 246.1084 | 274.1034 |
| TDGL    | 359.1925 | 387.1874 | TDGLT  | 460.2402 | 488.2351 | TDGLTS  | 547.2722 | 575.2671 |
| TDGLTSL | 660.3563 | 688.3512 | DG     | 145.0608 | 173.0557 | DGL     | 258.1448 | 286.1397 |
| DGLT    | 359.1925 | 387.1874 | DGLTS  | 446.2245 | 474.2195 | DGLTSL  | 559.3086 | 587.3035 |
| DGLTSLD | 674.3355 | 702.3305 | GL     | 143.1179 | 171.1128 | GLT     | 244.1656 | 272.1605 |
| GLTS    | 331.1976 | 359.1925 | GLTSL  | 444.2817 | 472.2766 | GLTSLD  | 559.3086 | 587.3035 |
| LT      | 187.1441 | 215.1390 | LTS    | 274.1761 | 302.1710 | LTSL    | 387.2602 | 415.2551 |
| LTSLD   | 502.2871 | 530.2821 | TS     | 161.0921 | 189.0870 | TSL     | 274.1761 | 302.1710 |
| TSLD    | 389.2031 | 417.1980 | SL     | 173.1285 | 201.1234 | SLD     | 288.1554 | 316.1503 |
| LD      | 201.1234 | 229.1183 |        |          |          |         |          |          |

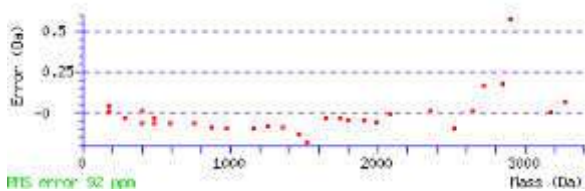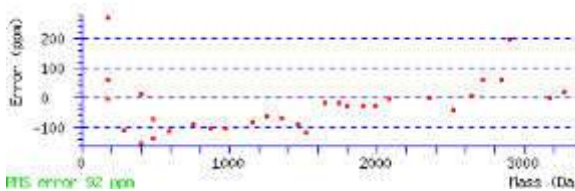

NCBI BLAST search of [VTPEPGVPPEEAGA AVAAESSTGTWTTVWTDGLTSLDR](#)

(Parameters: blastp, nr protein database, expect=20000, no filter, PAM30)

Other BLAST [web gateways](#)

All matches to this query

| Score | Mr(calc)  | Delta   | Sequence                                                |
|-------|-----------|---------|---------------------------------------------------------|
| 229.8 | 3854.8487 | 0.1315  | <a href="#">VTPEPGVPPEEAGA AVAAESSTGTWTTVWTDGLTSLDR</a> |
| 229.8 | 3854.8487 | 0.1315  | <a href="#">VTPEPGVPPEEAGA AVAAESSTGTWTTVWTDGLTSLDR</a> |
| 216.9 | 3854.9075 | 0.0727  | <a href="#">VTPEPGVPAREAGA AVAAESSTGTWTTVWTDGLTSLDR</a> |
| 208.1 | 3854.8309 | 0.1493  | <a href="#">MTPPPGVPPEEAGA AVAAESSTGTWTTVWTDGLTSLDR</a> |
| 208.1 | 3855.8439 | -0.8637 | <a href="#">ITPEPGVPPEEAGA AVAAESSTGTWTTVWTDGLTSLDR</a> |
| 208.1 | 3853.9011 | 1.0792  | <a href="#">VTPKPGVPPEEAGA AVAAESSTGTWTTVWTDGLTSLDR</a> |
| 208.1 | 3853.8647 | 1.1155  | <a href="#">VTPEPGVPPEEAGA AVAAESSTGTWTTVWTDGITSIDR</a> |
| 208.1 | 3853.8647 | 1.1155  | <a href="#">VTPEPGVPPEEAGA AVAAESSTGTWTTVWTDGITSIDR</a> |
| 208.1 | 3853.8647 | 1.1155  | <a href="#">VTPEPGVPPEEAGA AVAAESSTGTWTTVWTDGLTSLDR</a> |
| 208.1 | 3853.8647 | 1.1155  | <a href="#">VTPEPGVPPEEAGA AVAAESSTGTWTTVWTDGLTSLDR</a> |

Mascot: <http://www.matrixscience.com/>





# Mascot Search Results

## Peptide View **Spot no 97**

### MS/MS Fragmentation of **QMSLLLR**

Found in **gi|11466784** in **NCBI**nr, ATP synthase CF1 alpha subunit [Oryza sativa Japonica Group]

Match to Query 5: 859.545454 from(860.552730,1+) intensity(0.0000) index(0)

Title: Label: I11, Spot\_Id: 216645, Peak\_List\_Id: 221405, MSMS Job\_Run\_Id: 21364, Comment:

Data file C:\Documents and Settings\Administrator\Desktop\farah BHU\Akansha BHU\RAJESH\12-1-13 raj\ppw\_I11\_136074508400.txt

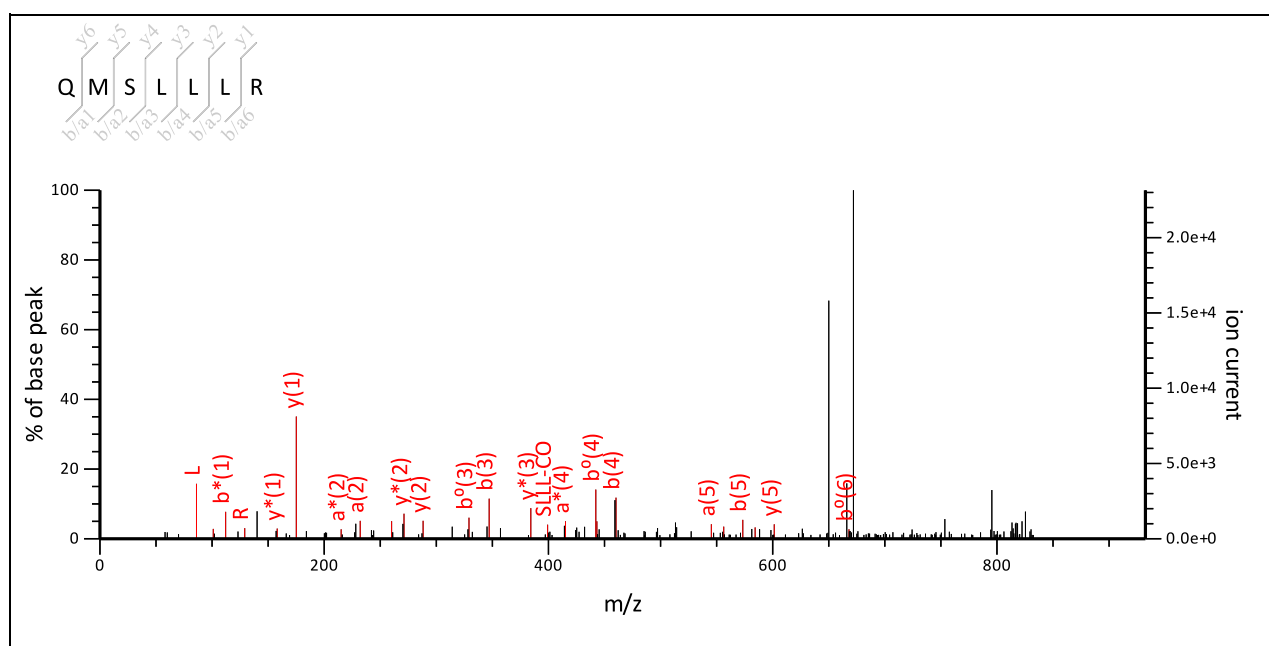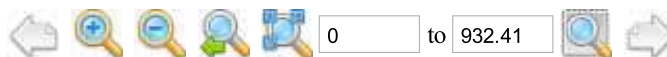

Label all possible matches  Label matches used for scoring

Monoisotopic mass of neutral peptide Mr(calc): 859.4949

Fixed modifications: Carbamidomethyl (C) (apply to specified residues or termini only)

Ions Score: 28 Expect: 12

Matches : 29/91 fragment ions using 40 most intense peaks ([help](#))

| # | Immon.         | a               | a*              | a <sup>0</sup> | b               | b*              | b <sup>0</sup>  | d        | Seq.     | v        | w        | y               | y*              | y <sup>0</sup> | # |
|---|----------------|-----------------|-----------------|----------------|-----------------|-----------------|-----------------|----------|----------|----------|----------|-----------------|-----------------|----------------|---|
| 1 | 101.0709       | <b>101.0709</b> | 84.0444         |                | <b>129.0659</b> | 112.0393        |                 | 44.0495  | <b>Q</b> |          |          |                 |                 |                | 7 |
| 2 | 104.0528       | <b>232.1114</b> | <b>215.0849</b> |                | <b>260.1063</b> | 243.0798        |                 | 172.1081 | <b>M</b> | 656.4090 | 655.4137 | 732.4437        | 715.4171        | 714.4331       | 6 |
| 3 | 60.0444        | 319.1435        | 302.1169        | 301.1329       | <b>347.1384</b> | 330.1118        | <b>329.1278</b> | 303.1485 | <b>S</b> | 569.3770 | 568.3817 | <b>601.4032</b> | <b>584.3766</b> | 583.3926       | 5 |
| 4 | <b>86.0964</b> | 432.2275        | <b>415.2010</b> | 414.2170       | <b>460.2224</b> | <b>443.1959</b> | <b>442.2119</b> | 390.1806 | <b>L</b> | 456.2929 | 455.2976 | 514.3711        | 497.3446        |                | 4 |
| 5 | <b>86.0964</b> | <b>545.3116</b> | 528.2850        | 527.3010       | <b>573.3065</b> | <b>556.2799</b> | 555.2959        | 503.2646 | <b>L</b> | 343.2088 | 342.2136 | 401.2871        | <b>384.2605</b> |                | 3 |
| 6 | <b>86.0964</b> | 658.3956        | 641.3691        | 640.3851       | 686.3906        | 669.3640        | <b>668.3800</b> | 616.3487 | <b>L</b> | 230.1248 | 229.1295 | <b>288.2030</b> | <b>271.1765</b> |                | 2 |
| 7 | 129.1135       |                 |                 |                |                 |                 |                 |          | <b>R</b> | 74.0237  | 73.0284  | <b>175.1190</b> | <b>158.0924</b> |                | 1 |

| Seq          | ya              | yb       | Seq        | ya       | yb       | Seq         | ya       | yb       |
|--------------|-----------------|----------|------------|----------|----------|-------------|----------|----------|
| <b>MS</b>    | 191.0849        | 219.0798 | <b>MSL</b> | 304.1689 | 332.1639 | <b>MSLL</b> | 417.2530 | 445.2479 |
| <b>MSLLL</b> | 530.3371        | 558.3320 | <b>SL</b>  | 173.1285 | 201.1234 | <b>SLL</b>  | 286.2125 | 314.2074 |
| <b>SLLL</b>  | <b>399.2966</b> | 427.2915 | <b>LL</b>  | 199.1805 | 227.1754 | <b>LLL</b>  | 312.2646 | 340.2595 |
| <b>LL</b>    | 199.1805        | 227.1754 |            |          |          |             |          |          |

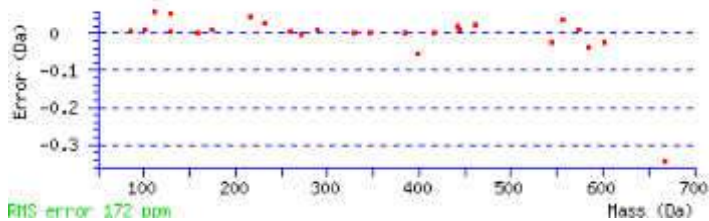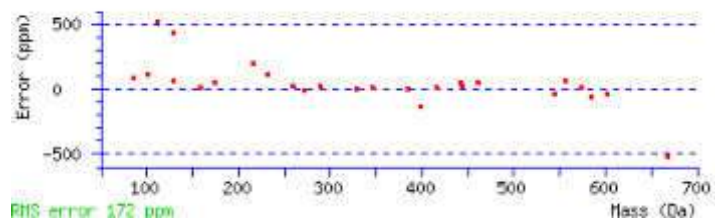

NCBI **BLAST** search of [QMSLLLR](#)

(Parameters: blastp, nr protein database, expect=20000, no filter, PAM30)

Other BLAST [web gateways](#)

#### All matches to this query

| Score | Mr(calc) | Delta   | Sequence                  |
|-------|----------|---------|---------------------------|
| 40.8  | 859.4586 | 0.0869  | <a href="#">MGVLIDGR</a>  |
| 30.2  | 859.4222 | 0.1233  | <a href="#">GMPDLATR</a>  |
| 28.4  | 859.4949 | 0.0505  | <a href="#">QMSLILR</a>   |
| 28.4  | 859.4949 | 0.0505  | <a href="#">QMSLLLR</a>   |
| 24.7  | 858.4923 | 1.0532  | <a href="#">ASKLLDGR</a>  |
| 22.6  | 858.4811 | 1.0644  | <a href="#">LEGGLAATK</a> |
| 22.5  | 859.4586 | 0.0869  | <a href="#">GIVMIDGR</a>  |
| 22.3  | 859.4586 | 0.0869  | <a href="#">AVVMLDGR</a>  |
| 22.3  | 860.4352 | -0.8897 | <a href="#">GDKTIDGR</a>  |
| 22.3  | 859.4399 | 0.1055  | <a href="#">IGETLDGR</a>  |

Mascot: <http://www.matrixscience.com/>




**Mascot Search Results**
**Peptide View** **Spot no 97**
MS/MS Fragmentation of **VVQVGDGIAR**Found in **gi11466784** in **NCBI**nr, ATP synthase CF1 alpha subunit [Oryza sativa Japonica Group]

Match to Query 14: 1012.631024 from(1013.638300,1+) intensity(0.0000) index(3)

Title: Label: I11, Spot\_Id: 216645, Peak\_List\_Id: 221421, MSMS Job\_Run\_Id: 21364, Comment:

Data file C:\Documents and Settings\Administrator\Desktop\farah BHU\Akansha BHU\RAJESH\12-1-13 raj\ppw\_I11\_136074508400.txt

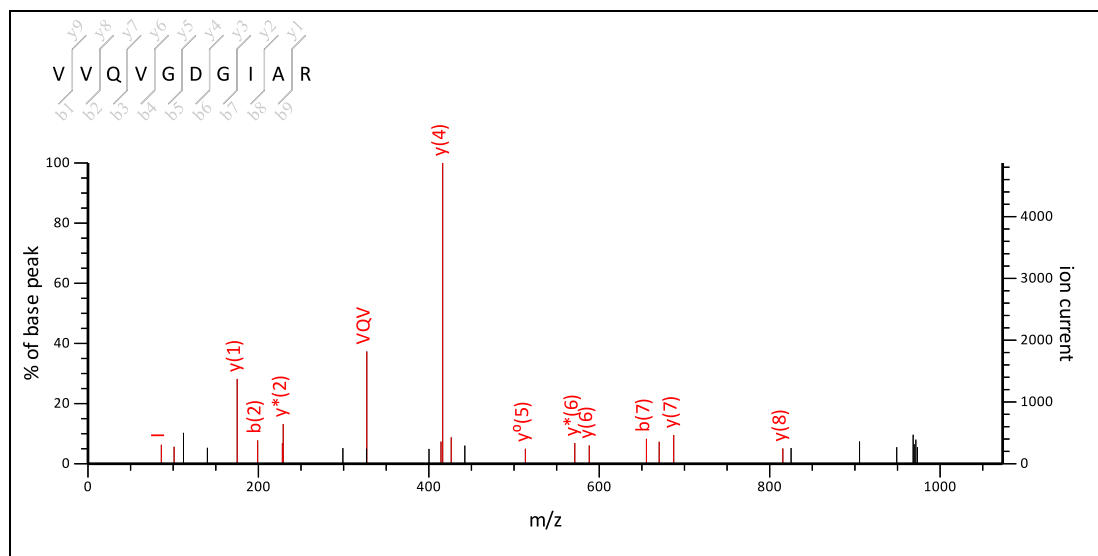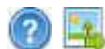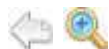

0 to 1073.36

Label all possible matches  Label matches used for scoring 

Monoisotopic mass of neutral peptide Mr(calc): 1012.5666

Fixed modifications: Carbamidomethyl (C) (apply to specified residues or termini only)

Ions Score: 40 Expect: 0.54

Matches : 24/148 fragment ions using 26 most intense peaks ([help](#))

| #  | Immon.   | a        | a*       | a <sup>0</sup> | b        | b*       | b <sup>0</sup> | d        | d'       | Seq. | v        | w        | w'       | y        | y*       | y <sup>0</sup> | #  |
|----|----------|----------|----------|----------------|----------|----------|----------------|----------|----------|------|----------|----------|----------|----------|----------|----------------|----|
| 1  | 72.0808  | 72.0808  |          |                | 100.0757 |          |                | 44.0495  |          | V    |          |          |          |          |          |                | 10 |
| 2  | 72.0808  | 171.1492 |          |                | 199.1441 |          |                | 157.1335 |          | V    | 870.4428 | 883.4632 |          | 914.5054 | 897.4789 | 896.4948       | 9  |
| 3  | 101.0709 | 299.2078 | 282.1812 |                | 327.2027 | 310.1761 |                | 242.1863 |          | Q    | 742.3842 | 741.3890 |          | 815.4370 | 798.4104 | 797.4264       | 8  |
| 4  | 72.0808  | 398.2762 | 381.2496 |                | 426.2711 | 409.2445 |                | 384.2605 |          | V    | 643.3158 | 656.3362 |          | 687.3784 | 670.3519 | 669.3679       | 7  |
| 5  | 30.0338  | 455.2976 | 438.2711 |                | 483.2926 | 466.2660 |                |          |          | G    |          |          |          | 588.3100 | 571.2835 | 570.2994       | 6  |
| 6  | 88.0393  | 570.3246 | 553.2980 | 552.3140       | 598.3195 | 581.2930 | 580.3089       | 526.3348 |          | D    | 471.2674 | 470.2722 |          | 531.2885 | 514.2620 | 513.2780       | 5  |
| 7  | 30.0338  | 627.3461 | 610.3195 | 609.3355       | 655.3410 | 638.3144 | 637.3304       |          |          | G    |          |          |          | 416.2616 | 399.2350 |                | 4  |
| 8  | 86.0964  | 740.4301 | 723.4036 | 722.4196       | 768.4250 | 751.3985 | 750.4145       | 712.3988 | 726.4145 | I    | 301.1619 | 314.1823 | 328.1979 | 359.2401 | 342.2136 |                | 3  |
| 9  | 44.0495  | 811.4672 | 794.4407 | 793.4567       | 839.4621 | 822.4356 | 821.4516       |          |          | A    | 230.1248 |          |          | 246.1561 | 229.1295 |                | 2  |
| 10 | 129.1135 |          |          |                |          |          |                |          |          | R    | 74.0237  | 73.0284  |          | 175.1190 | 158.0924 |                | 1  |

| Seq   | ya       | yb       | Seq    | ya       | yb       | Seq     | ya       | yb       |
|-------|----------|----------|--------|----------|----------|---------|----------|----------|
| VQ    | 200.1394 | 228.1343 | VQV    | 299.2078 | 327.2027 | VQVG    | 356.2292 | 384.2241 |
| VQVGD | 471.2562 | 499.2511 | VQVGDG | 528.2776 | 556.2726 | VQVGDGI | 641.3617 | 669.3566 |
| QV    | 200.1394 | 228.1343 | QVG    | 257.1608 | 285.1557 | QVGD    | 372.1878 | 400.1827 |
| QVGDG | 429.2092 | 457.2041 | QVGDGI | 542.2933 | 570.2882 | QVGDGIA | 613.3304 | 641.3253 |
| VG    | 129.1022 | 157.0972 | VGD    | 244.1292 | 272.1241 | VGDG    | 301.1506 | 329.1456 |
| VGDGI | 414.2347 | 442.2296 | VGDGIA | 485.2718 | 513.2667 | GD      | 145.0608 | 173.0557 |
| GDG   | 202.0822 | 230.0771 | GDGI   | 315.1663 | 343.1612 | GDGIA   | 386.2034 | 414.1983 |
| DG    | 145.0608 | 173.0557 | DGI    | 258.1448 | 286.1397 | DGIA    | 329.1819 | 357.1769 |
| GI    | 143.1179 | 171.1128 | GIA    | 214.1550 | 242.1499 | IA      | 157.1335 | 185.1285 |

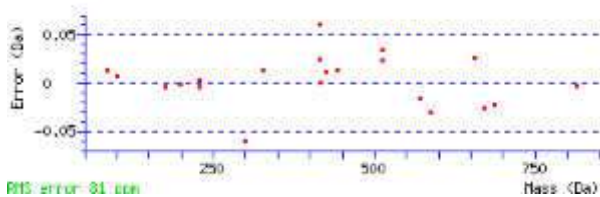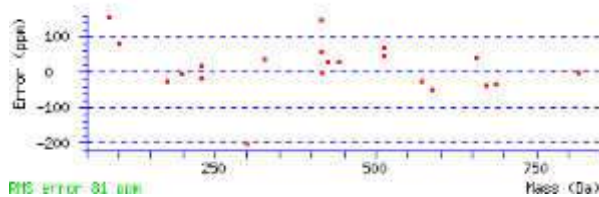

NCBI **BLAST** search of [VVQVGDGIAR](#)

(Parameters: blastp, nr protein database, expect=20000, no filter, PAM30)

Other BLAST [web gateways](#)

**All matches to this query**

| Score | Mr(calcd) | Delta   | Sequence                    |
|-------|-----------|---------|-----------------------------|
| 40.3  | 1012.5666 | 0.0645  | <a href="#">VVQVGDGIAR</a>  |
| 32.8  | 1012.5666 | 0.0645  | <a href="#">VQVVTAGSPR</a>  |
| 25.6  | 1012.6393 | -0.0083 | <a href="#">LGGVVTKIAR</a>  |
| 24.6  | 1012.5777 | 0.0533  | <a href="#">RAVDAAAAIR</a>  |
| 22.6  | 1012.5665 | 0.0645  | <a href="#">NIVVSAPSAR</a>  |
| 22.4  | 1012.5665 | 0.0645  | <a href="#">LAAASVAAPSR</a> |
| 21.6  | 1013.5730 | -0.9420 | <a href="#">AAGQVRGLSR</a>  |
| 21.4  | 1013.5869 | -0.9559 | <a href="#">LLVSGEVAAR</a>  |
| 21.4  | 1013.6022 | -0.9712 | <a href="#">ILGAFPLQR</a>   |
| 21.2  | 1012.5778 | 0.0532  | <a href="#">VVQRDAVAR</a>   |

Mascot: <http://www.matrixscience.com/>


**Mascot Search Results**
**Peptide View Spot no 97**
**MS/MS Fragmentation of IAQIPVSEAYLGR**

 Found in **gi|11466784** in **NCBIInr**, ATP synthase CF1 alpha subunit [Oryza sativa Japonica Group]

Match to Query 40: 1415.861624 from(1416.868900,1+) intensity(0.0000) index(9)

Title: Label: I11, Spot\_Id: 216645, Peak\_List\_Id: 221389, MSMS Job\_Run\_Id: 21364, Comment:

Data file C:\Documents and Settings\Administrator\Desktop\farah BHU\Akansha BHU\RAJESH\12-1-13 raj\ppw\_I11\_136074508400.txt

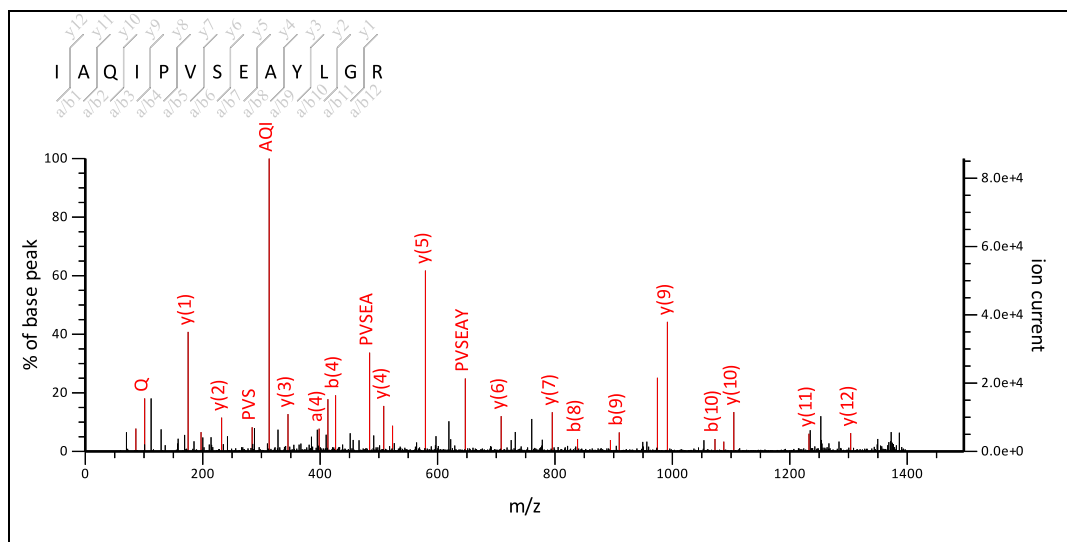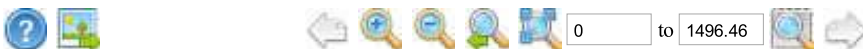
 Label all possible matches  Label matches used for scoring 

Monoisotopic mass of neutral peptide Mr(calc): 1415.7772

Fixed modifications: Carbamidomethyl (C) (apply to specified residues or termini only)

Ions Score: 106 Expect: 1.4e-07

 Matches : 33/212 fragment ions using 42 most intense peaks ([help](#))

| #  | Immon.   | a         | a*        | a <sup>0</sup> | b         | b*        | b <sup>0</sup> | d         | d'       | Seq. | v         | w         | w'        | y         | y*        |
|----|----------|-----------|-----------|----------------|-----------|-----------|----------------|-----------|----------|------|-----------|-----------|-----------|-----------|-----------|
| 1  | 86.0964  | 86.0964   |           |                | 114.0913  |           |                | 44.0495   |          | I    |           |           |           |           |           |
| 2  | 44.0495  | 157.1335  |           |                | 185.1285  |           |                |           |          | A    | 1287.6692 |           |           | 1303.7005 | 1286.6739 |
| 3  | 101.0709 | 285.1921  | 268.1656  |                | 313.1870  | 296.1605  |                | 228.1707  |          | Q    | 1159.6106 | 1158.6154 |           | 1232.6634 | 1215.6368 |
| 4  | 86.0964  | 398.2762  | 381.2496  |                | 426.2711  | 409.2445  |                | 370.2449  | 384.2605 | I    | 1046.5265 | 1059.5469 | 1073.5626 | 1104.6048 | 1087.5782 |
| 5  | 70.0651  | 495.3289  | 478.3024  |                | 523.3239  | 506.2973  |                | 469.3133  |          | P    | 949.4738  | 948.4785  |           | 991.5207  | 974.4942  |
| 6  | 72.0808  | 594.3974  | 577.3708  |                | 622.3923  | 605.3657  |                | 580.3817  |          | V    | 850.4054  | 863.4258  |           | 894.4680  | 877.4414  |
| 7  | 60.0444  | 681.4294  | 664.4028  | 663.4188       | 709.4243  | 692.3978  | 691.4137       | 665.4345  |          | S    | 763.3733  | 762.3781  |           | 795.3995  | 778.3730  |
| 8  | 102.0550 | 810.4720  | 793.4454  | 792.4614       | 838.4669  | 821.4403  | 820.4563       | 752.4665  |          | E    | 634.3307  | 633.3355  |           | 708.3675  | 691.3410  |
| 9  | 44.0495  | 881.5091  | 864.4825  | 863.4985       | 909.5040  | 892.4775  | 891.4934       |           |          | A    | 563.2936  |           |           | 579.3249  | 562.2984  |
| 10 | 136.0757 | 1044.5724 | 1027.5459 | 1026.5619      | 1072.5673 | 1055.5408 | 1054.5568      |           |          | Y    | 400.2303  |           |           | 508.2878  | 491.2613  |
| 11 | 86.0964  | 1157.6565 | 1140.6299 | 1139.6459      | 1185.6514 | 1168.6249 | 1167.6408      | 1115.6095 |          | L    | 287.1462  | 286.1510  |           | 345.2245  | 328.1979  |
| 12 | 30.0338  | 1214.6780 | 1197.6514 | 1196.6674      | 1242.6729 | 1225.6463 | 1224.6623      |           |          | G    |           |           |           | 232.1404  | 215.1139  |
| 13 | 129.1135 |           |           |                |           |           |                |           |          | R    | 74.0237   | 73.0284   |           | 175.1190  | 158.0924  |

| Seq    | ya       | yb       | Seq    | ya       | yb       | Seq     | ya       | yb       |
|--------|----------|----------|--------|----------|----------|---------|----------|----------|
| AQ     | 172.1081 | 200.1030 | AQI    | 285.1921 | 313.1870 | AQIP    | 382.2449 | 410.2398 |
| AQIPV  | 481.3133 | 509.3082 | AQIPVS | 568.3453 | 596.3402 | AQIPVSE | 697.3879 | 725.3828 |
| QI     | 214.1550 | 242.1499 | QIP    | 311.2078 | 339.2027 | QIPV    | 410.2762 | 438.2711 |
| QIPVS  | 497.3082 | 525.3031 | QIPVSE | 626.3508 | 654.3457 | QIPVSEA | 697.3879 | 725.3828 |
| IP     | 183.1492 | 211.1441 | IPV    | 282.2176 | 310.2125 | IPVS    | 369.2496 | 397.2445 |
| IPVSE  | 498.2922 | 526.2871 | IPVSEA | 569.3293 | 597.3243 | PV      | 169.1335 | 197.1285 |
| PVS    | 256.1656 | 284.1605 | PVSE   | 385.2082 | 413.2031 | PVSEA   | 456.2453 | 484.2402 |
| PVSEAY | 619.3086 | 647.3035 | VS     | 159.1128 | 187.1077 | VSE     | 288.1554 | 316.1503 |

|                         |          |          |                       |          |          |                        |          |          |
|-------------------------|----------|----------|-----------------------|----------|----------|------------------------|----------|----------|
| <a href="#">VSEA</a>    | 359.1925 | 387.1874 | <a href="#">VSEAY</a> | 522.2558 | 550.2508 | <a href="#">VSEAYL</a> | 635.3399 | 663.3348 |
| <a href="#">VSEAYLG</a> | 692.3614 | 720.3563 | <a href="#">SE</a>    | 189.0870 | 217.0819 | <a href="#">SEA</a>    | 260.1241 | 288.1190 |
| <a href="#">SEAY</a>    | 423.1874 | 451.1823 | <a href="#">SEAYL</a> | 536.2715 | 564.2664 | <a href="#">SEAYLG</a> | 593.2930 | 621.2879 |
| <a href="#">EA</a>      | 173.0921 | 201.0870 | <a href="#">EAY</a>   | 336.1554 | 364.1503 | <a href="#">EAYL</a>   | 449.2395 | 477.2344 |
| <a href="#">EAYLG</a>   | 506.2609 | 534.2558 | <a href="#">AY</a>    | 207.1128 | 235.1077 | <a href="#">AYL</a>    | 320.1969 | 348.1918 |
| <a href="#">AYLG</a>    | 377.2183 | 405.2132 | <a href="#">YL</a>    | 249.1598 | 277.1547 | <a href="#">YLG</a>    | 306.1812 | 334.1761 |
| <a href="#">LG</a>      | 143.1179 | 171.1128 |                       |          |          |                        |          |          |

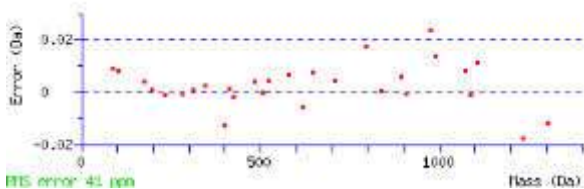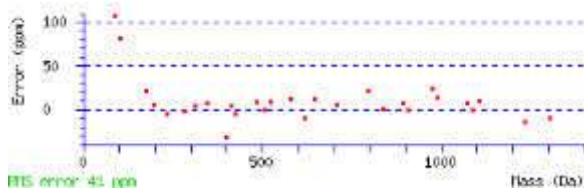

NCBI BLAST search of [IAQIPVSEAYLGR](#)

(Parameters: blastp, nr protein database, expect=20000, no filter, PAM30)

Other BLAST [web gateways](#)

#### All matches to this query

| Score | Mr(calc)  | Delta   | Sequence                       |
|-------|-----------|---------|--------------------------------|
| 105.8 | 1415.7772 | 0.0844  | <a href="#">IAQIPVSEAYLGR</a>  |
| 103.6 | 1415.7772 | 0.0844  | <a href="#">LAQIPVSEAYLGR</a>  |
| 85.2  | 1415.7773 | 0.0844  | <a href="#">IAQIPVSEFLGR</a>   |
| 56.4  | 1415.7772 | 0.0844  | <a href="#">IAQIPGESYIGR</a>   |
| 22.9  | 1415.7368 | 0.1248  | <a href="#">IAGALOADSEASRK</a> |
| 20.7  | 1415.8136 | 0.0480  | <a href="#">LLAQELLOYGRLR</a>  |
| 20.2  | 1416.7473 | -0.8857 | <a href="#">NPTNHQIELVPR</a>   |
| 20.1  | 1415.8500 | 0.0116  | <a href="#">KIAVALAEILYGR</a>  |
| 17.9  | 1415.7885 | 0.0731  | <a href="#">RGADPVLSYIAVR</a>  |
| 17.8  | 1415.7343 | 0.1273  | <a href="#">IKALHLYDCOR</a>    |

Mascot: <http://www.matrixscience.com/>



# Mascot Search Results

## Peptide View **Spot no 97**

MS/MS Fragmentation of **EAYPGDVFLHSR**Found in **gi11466784** in **NCBIInr**, ATP synthase CF1 alpha subunit [Oryza sativa Japonica Group]

Match to Query 52: 1552.821724 from(1553.829000,1+) intensity(0.0000) index(14)

Title: Label: I11, Spot\_Id: 216645, Peak\_List\_Id: 221390, MSMS Job\_Run\_Id: 21364, Comment:

Data file C:\Documents and Settings\Administrator\Desktop\farah BHU\Akansha BHU\RAJESH\12-1-13 raj\ppw\_I11\_136074508400.txt

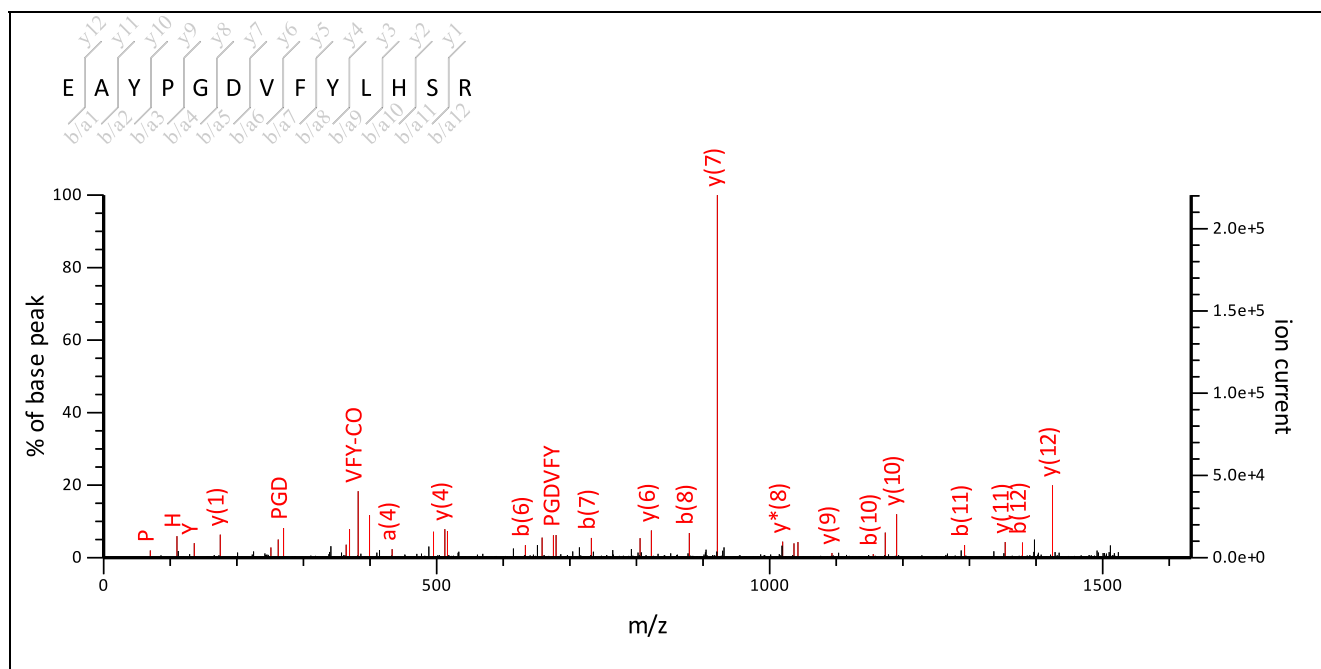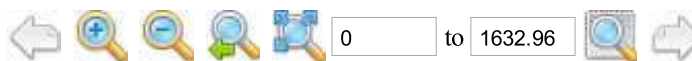
 Label all possible matches  Label matches used for scoring 

Monoisotopic mass of neutral peptide Mr(calc): 1552.7310

Fixed modifications: Carbamidomethyl (C) (apply to specified residues or termini only)

Ions Score: 112 Expect: 3.4e-08

Matches : 42/195 fragment ions using 45 most intense peaks ([help](#))

| #  | Immon.   | a         | a <sup>0</sup> | b         | b <sup>0</sup> | d         | Seq. | v         | w         | y         | y*        | y <sup>0</sup> | #  |
|----|----------|-----------|----------------|-----------|----------------|-----------|------|-----------|-----------|-----------|-----------|----------------|----|
| 1  | 102.0550 | 102.0550  | 84.0444        | 130.0499  | 112.0393       | 44.0495   | E    |           |           |           |           |                | 13 |
| 2  | 44.0495  | 173.0921  | 155.0815       | 201.0870  | 183.0764       |           | A    | 1408.6644 |           | 1424.6957 | 1407.6692 | 1406.6852      | 12 |
| 3  | 136.0757 | 336.1554  | 318.1448       | 364.1503  | 346.1397       |           | Y    | 1245.6011 |           | 1353.6586 | 1336.6321 | 1335.6480      | 11 |
| 4  | 70.0651  | 433.2082  | 415.1976       | 461.2031  | 443.1925       | 407.1925  | P    | 1148.5483 | 1147.5531 | 1190.5953 | 1173.5687 | 1172.5847      | 10 |
| 5  | 30.0338  | 490.2296  | 472.2191       | 518.2245  | 500.2140       |           | G    |           |           | 1093.5425 | 1076.5160 | 1075.5320      | 9  |
| 6  | 88.0393  | 605.2566  | 587.2460       | 633.2515  | 615.2409       | 561.2667  | D    | 976.4999  | 975.5047  | 1036.5211 | 1019.4945 | 1018.5105      | 8  |
| 7  | 72.0808  | 704.3250  | 686.3144       | 732.3199  | 714.3093       | 690.3093  | V    | 877.4315  | 890.4519  | 921.4941  | 904.4676  | 903.4835       | 7  |
| 8  | 120.0808 | 851.3934  | 833.3828       | 879.3883  | 861.3777       |           | F    | 730.3631  |           | 822.4257  | 805.3991  | 804.4151       | 6  |
| 9  | 136.0757 | 1014.4567 | 996.4462       | 1042.4516 | 1024.4411      |           | Y    | 567.2998  |           | 675.3573  | 658.3307  | 657.3467       | 5  |
| 10 | 86.0964  | 1127.5408 | 1109.5302      | 1155.5357 | 1137.5251      | 1085.4938 | L    | 454.2157  | 453.2205  | 512.2940  | 495.2674  | 494.2834       | 4  |
| 11 | 110.0713 | 1264.5997 | 1246.5891      | 1292.5946 | 1274.5841      |           | H    | 317.1568  |           | 399.2099  | 382.1833  | 381.1993       | 3  |
| 12 | 60.0444  | 1351.6317 | 1333.6212      | 1379.6266 | 1361.6161      | 1335.6368 | S    | 230.1248  | 229.1295  | 262.1510  | 245.1244  | 244.1404       | 2  |

|    |          |  |  |  |  |   |         |         |          |          |  |   |
|----|----------|--|--|--|--|---|---------|---------|----------|----------|--|---|
| 13 | 129.1135 |  |  |  |  | R | 74.0237 | 73.0284 | 175.1190 | 158.0924 |  | 1 |
|----|----------|--|--|--|--|---|---------|---------|----------|----------|--|---|

| Seq    | ya       | yb       | Seq    | ya       | yb       | Seq    | ya       | yb       |
|--------|----------|----------|--------|----------|----------|--------|----------|----------|
| AY     | 207.1128 | 235.1077 | AYP    | 304.1656 | 332.1605 | AYPG   | 361.1870 | 389.1819 |
| AYPGD  | 476.2140 | 504.2089 | AYPGDV | 575.2824 | 603.2773 | YP     | 233.1285 | 261.1234 |
| YPG    | 290.1499 | 318.1448 | YPGD   | 405.1769 | 433.1718 | YPGDV  | 504.2453 | 532.2402 |
| YPGDVF | 651.3137 | 679.3086 | PG     | 127.0866 | 155.0815 | PGD    | 242.1135 | 270.1084 |
| PGDV   | 341.1819 | 369.1769 | PGDVF  | 488.2504 | 516.2453 | PGDVFY | 651.3137 | 679.3086 |
| GD     | 145.0608 | 173.0557 | GDV    | 244.1292 | 272.1241 | GDVF   | 391.1976 | 419.1925 |
| GDVFY  | 554.2609 | 582.2558 | GDVFL  | 667.3450 | 695.3399 | DV     | 187.1077 | 215.1026 |
| DVF    | 334.1761 | 362.1710 | DVFY   | 497.2395 | 525.2344 | DVFL   | 610.3235 | 638.3184 |
| VF     | 219.1492 | 247.1441 | VFY    | 382.2125 | 410.2074 | VFL    | 495.2966 | 523.2915 |
| VFLH   | 632.3555 | 660.3504 | FY     | 283.1441 | 311.1390 | FYL    | 396.2282 | 424.2231 |
| FYLH   | 533.2871 | 561.2820 | FYLHS  | 620.3191 | 648.3140 | YL     | 249.1598 | 277.1547 |
| YLH    | 386.2187 | 414.2136 | YLHS   | 473.2507 | 501.2456 | LH     | 223.1553 | 251.1503 |
| LHS    | 310.1874 | 338.1823 | HS     | 197.1033 | 225.0982 |        |          |          |

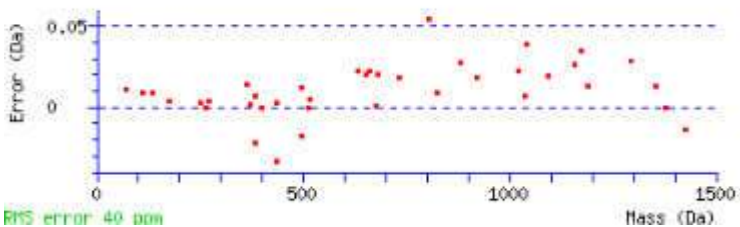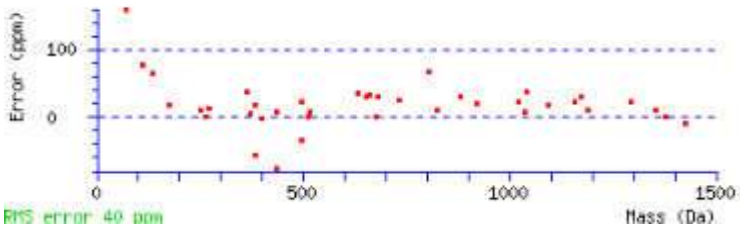

NCBI **BLAST** search of [EAYPGDVFYLHSR](#)

(Parameters: blastp, nr protein database, expect=20000, no filter, PAM30)

Other BLAST [web gateways](#)

#### All matches to this query

| Score | Mr(calc)  | Delta   | Sequence                       |
|-------|-----------|---------|--------------------------------|
| 111.8 | 1552.7310 | 0.0907  | <a href="#">EAYPGDVFYIHSR</a>  |
| 111.8 | 1552.7310 | 0.0907  | <a href="#">EAYPGDVFYLHSR</a>  |
| 19.7  | 1552.7998 | 0.0219  | <a href="#">LRVYTVQDAAFDR</a>  |
| 17.3  | 1552.7191 | 0.1026  | <a href="#">LSYPEDLGMQASSR</a> |
| 17.1  | 1552.8725 | -0.0508 | <a href="#">LRPRYFSISSSLK</a>  |
| 15.7  | 1552.7369 | 0.0848  | <a href="#">EAYSDSQLIEKDR</a>  |
| 15.3  | 1552.8249 | -0.0032 | <a href="#">EFSLVGRNIYIDK</a>  |
| 15.2  | 1552.8144 | 0.0073  | <a href="#">EGMDISVRHLLQR</a>  |
| 15.1  | 1552.7555 | 0.0662  | <a href="#">ISPLYSAEGTCLSR</a> |
| 14.5  | 1552.7609 | 0.0608  | <a href="#">FLREWMLYHSR</a>    |





**MATRIX SCIENCE Mascot Search Results**

**Peptide View Spot no 97**

MS/MS Fragmentation of **GQDVICVYVAIGQR**

Found in **gi|11466784** in **NCBIInr**, ATP synthase CF1 alpha subunit [Oryza sativa Japonica Group]

Match to Query 55: 1576.897524 from(1577.904800,1+) intensity(0.0000) index(15)

Title: Label: I11, Spot\_Id: 216645, Peak\_List\_Id: 221403, MSMS Job\_Run\_Id: 21364, Comment:

Data file C:\Documents and Settings\Administrator\Desktop\farah BHU\Akansha BHU\RAJESH\12-1-13 raj\ppw\_I11\_136074508400.txt

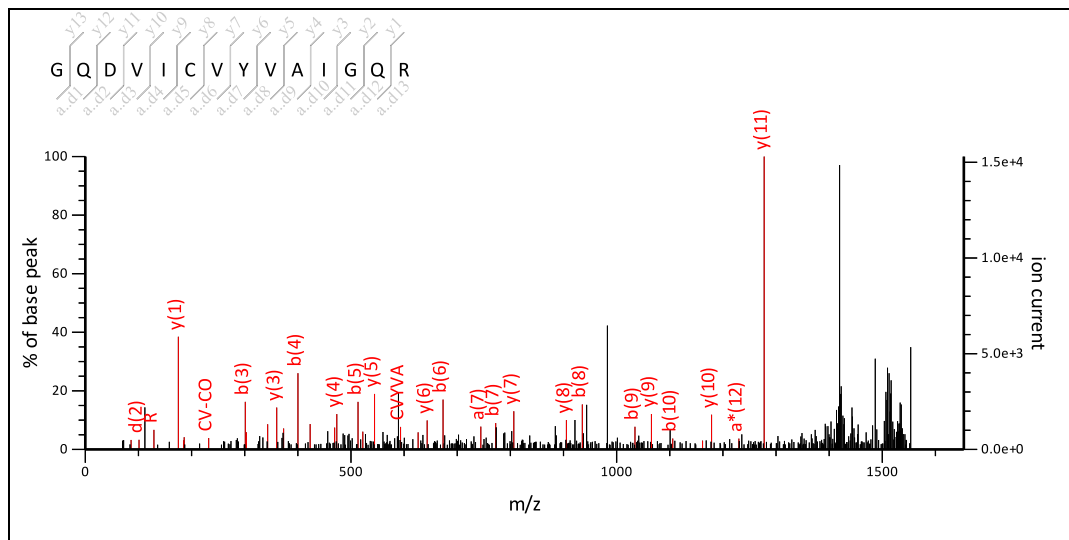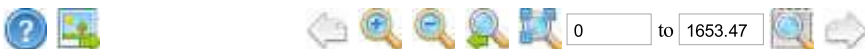

Label all possible matches  Label matches used for scoring

Monoisotopic mass of neutral peptide Mr(calc): 1576.8032

Fixed modifications: Carbamidomethyl (C) (apply to specified residues or termini only)

Ions Score: 66 Expect: 0.0012

Matches : 43/233 fragment ions using 60 most intense peaks [\(help\)](#)

| #  | Immon.   | a         | a*        | a <sup>0</sup> | b         | b*        | b <sup>0</sup> | d         | d'        | Seq. | v         | w         | w'        | y         | y*        |
|----|----------|-----------|-----------|----------------|-----------|-----------|----------------|-----------|-----------|------|-----------|-----------|-----------|-----------|-----------|
| 1  | 30.0338  | 30.0338   |           |                | 58.0287   |           |                | 44.0495   |           | G    |           |           |           |           |           |
| 2  | 101.0709 | 158.0924  | 141.0659  |                | 186.0873  | 169.0608  |                | 101.0709  |           | Q    | 1447.7362 | 1446.7410 |           | 1520.7890 | 1503.7624 |
| 3  | 88.0393  | 273.1193  | 256.0928  | 255.1088       | 301.1143  | 284.0877  | 283.1037       | 229.1295  |           | D    | 1332.7093 | 1331.7140 |           | 1392.7304 | 1375.7038 |
| 4  | 72.0808  | 372.1878  | 355.1612  | 354.1772       | 400.1827  | 383.1561  | 382.1721       | 358.1721  |           | V    | 1233.6409 | 1246.6613 |           | 1277.7035 | 1260.6769 |
| 5  | 86.0964  | 485.2718  | 468.2453  | 467.2613       | 513.2667  | 496.2402  | 495.2562       | 457.2405  | 471.2562  | I    | 1120.5568 | 1133.5772 | 1147.5928 | 1178.6350 | 1161.6085 |
| 6  | 133.0430 | 645.3025  | 628.2759  | 627.2919       | 673.2974  | 656.2708  | 655.2868       | 556.3089  |           | C    | 960.5261  | 959.5309  |           | 1065.5510 | 1048.5244 |
| 7  | 72.0808  | 744.3709  | 727.3443  | 726.3603       | 772.3658  | 755.3393  | 754.3552       | 730.3552  |           | V    | 861.4577  | 874.4781  |           | 905.5203  | 888.4938  |
| 8  | 136.0757 | 907.4342  | 890.4077  | 889.4237       | 935.4291  | 918.4026  | 917.4186       |           |           | Y    | 698.3944  |           |           | 806.4519  | 789.4254  |
| 9  | 72.0808  | 1006.5026 | 989.4761  | 988.4921       | 1034.4975 | 1017.4710 | 1016.4870      | 992.4870  |           | V    | 599.3260  | 612.3464  |           | 643.3886  | 626.3620  |
| 10 | 44.0495  | 1077.5397 | 1060.5132 | 1059.5292      | 1105.5347 | 1088.5081 | 1087.5241      |           |           | A    | 528.2889  |           |           | 544.3202  | 527.2936  |
| 11 | 86.0964  | 1190.6238 | 1173.5973 | 1172.6132      | 1218.6187 | 1201.5922 | 1200.6082      | 1162.5925 | 1176.6082 | I    | 415.2048  | 428.2252  | 442.2409  | 473.2831  | 456.2565  |
| 12 | 30.0338  | 1247.6453 | 1230.6187 | 1229.6347      | 1275.6402 | 1258.6136 | 1257.6296      |           |           | G    |           |           |           | 360.1990  | 343.1724  |
| 13 | 101.0709 | 1375.7038 | 1358.6773 | 1357.6933      | 1403.6988 | 1386.6722 | 1385.6882      | 1318.6824 |           | Q    | 230.1248  | 229.1295  |           | 303.1775  | 286.1510  |
| 14 | 129.1135 |           |           |                |           |           |                |           |           | R    | 74.0237   | 73.0284   |           | 175.1190  | 158.0924  |

| Seq   | ya       | yb       | Seq    | ya       | yb       | Seq    | ya       | yb       |
|-------|----------|----------|--------|----------|----------|--------|----------|----------|
| QD    | 216.0979 | 244.0928 | QDV    | 315.1663 | 343.1612 | QDVI   | 428.2504 | 456.2453 |
| QDVIC | 588.2810 | 616.2759 | QDVICV | 687.3494 | 715.3443 | DV     | 187.1077 | 215.1026 |
| DVI   | 300.1918 | 328.1867 | DVIC   | 460.2224 | 488.2173 | DVICV  | 559.2908 | 587.2858 |
| VI    | 185.1648 | 213.1598 | VIC    | 345.1955 | 373.1904 | VICV   | 444.2639 | 472.2588 |
| VICVY | 607.3272 | 635.3221 | IC     | 246.1271 | 274.1220 | ICV    | 345.1955 | 373.1904 |
| ICVY  | 508.2588 | 536.2537 | ICVYV  | 607.3272 | 635.3221 | ICVYVA | 678.3643 | 706.3593 |
| CV    | 232.1114 | 260.1063 | CVY    | 395.1748 | 423.1697 | CVYV   | 494.2432 | 522.2381 |

|                        |          |                          |                        |          |                          |                        |          |          |
|------------------------|----------|--------------------------|------------------------|----------|--------------------------|------------------------|----------|----------|
| <a href="#">CVYYA</a>  | 565.2803 | <a href="#">593.2752</a> | <a href="#">CVYYAI</a> | 678.3643 | 706.3593                 | <a href="#">VY</a>     | 235.1441 | 263.1390 |
| <a href="#">VYV</a>    | 334.2125 | 362.2074                 | <a href="#">VYVA</a>   | 405.2496 | 433.2445                 | <a href="#">VYVAI</a>  | 518.3337 | 546.3286 |
| <a href="#">VYVAIG</a> | 575.3552 | 603.3501                 | <a href="#">YV</a>     | 235.1441 | 263.1390                 | <a href="#">YVA</a>    | 306.1812 | 334.1761 |
| <a href="#">YVAI</a>   | 419.2653 | 447.2602                 | <a href="#">YVAIG</a>  | 476.2867 | 504.2817                 | <a href="#">YVAIGQ</a> | 604.3453 | 632.3402 |
| <a href="#">VA</a>     | 143.1179 | 171.1128                 | <a href="#">VAI</a>    | 256.2020 | 284.1969                 | <a href="#">VAIG</a>   | 313.2234 | 341.2183 |
| <a href="#">VAIGQ</a>  | 441.2820 | <a href="#">469.2769</a> | <a href="#">AI</a>     | 157.1335 | <a href="#">185.1285</a> | <a href="#">AIG</a>    | 214.1550 | 242.1499 |
| <a href="#">AIGQ</a>   | 342.2136 | 370.2085                 | <a href="#">IG</a>     | 143.1179 | 171.1128                 | <a href="#">IGQ</a>    | 271.1765 | 299.1714 |
| <a href="#">GQ</a>     | 158.0924 | <a href="#">186.0873</a> |                        |          |                          |                        |          |          |

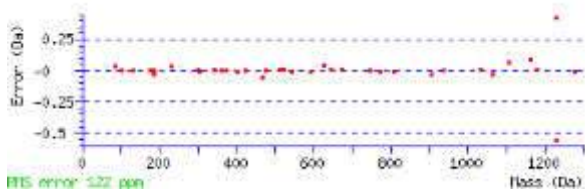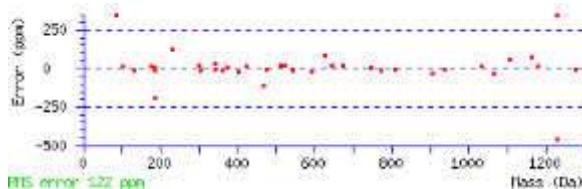

NCBI BLAST search of [GODVICVYVAIGQR](#)

(Parameters: blastp, nr protein database, expect=20000, no filter, PAM30)

Other BLAST [web gateways](#)

#### All matches to this query

| Score | Mr(calc)  | Delta   | Sequence                         |
|-------|-----------|---------|----------------------------------|
| 65.8  | 1576.8032 | 0.0943  | <a href="#">GODVICVYVAIGQR</a>   |
| 65.8  | 1576.8032 | 0.0944  | <a href="#">GENVICVYVAIGQR</a>   |
| 53.8  | 1575.8192 | 1.0784  | <a href="#">GONVICVYVAIGQR</a>   |
| 20.0  | 1577.7169 | -0.8193 | <a href="#">GAGDSLAEAAOSSSAK</a> |
| 17.6  | 1577.6926 | -0.7951 | <a href="#">VNDVICTMSGSHSR</a>   |
| 17.0  | 1576.9413 | -0.0438 | <a href="#">QHLVLITATKLOGR</a>   |
| 16.7  | 1575.8290 | 1.0685  | <a href="#">DLMTTALAATTAKPR</a>  |
| 16.0  | 1575.7059 | 1.1916  | <a href="#">QMSDASGRAASDOPR</a>  |
| 15.0  | 1576.7733 | 0.1243  | <a href="#">ASAAVYPASEDELVR</a>  |
| 14.2  | 1576.8243 | 0.0732  | <a href="#">QTGLSGSSAIVIAAMR</a> |

Mascot: <http://www.matrixscience.com/>

**MATRIX SCIENCE Mascot Search Results**

**Peptide View Spot no 97**

MS/MS Fragmentation of **HTLIIYDDL SKQAQAYR**

Found in **gi|11466784** in **NCBIInr**, ATP synthase CF1 alpha subunit [Oryza sativa Japonica Group]

Match to Query 69: 2034.170424 from(2035.177700,1+) intensity(0.0000) index(19)

Title: Label: II1, Spot\_Id: 216645, Peak\_List\_Id: 221401, MSMS Job\_Run\_Id: 21364, Comment:

Data file C:\Documents and Settings\Administrator\Desktop\farah BHU\Akansha BHU\RAJESH\12-1-13 raj\ppw\_II1\_136074508400.txt

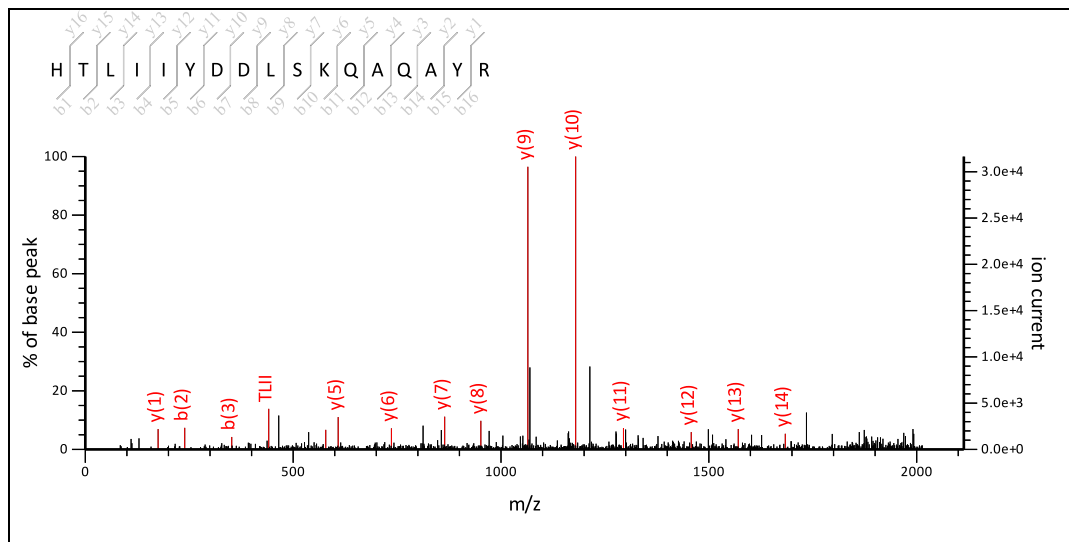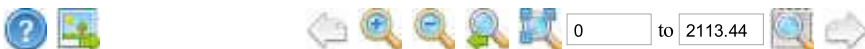

Label all possible matches  Label matches used for scoring

Monoisotopic mass of neutral peptide Mr(calc): 2034.0534

Fixed modifications: Carbamidomethyl (C) (apply to specified residues or termini only)

Ions Score: 90 Expect: 3.8e-06

Matches : 15/292 fragment ions using 20 most intense peaks [\(help\)](#)

| #  | Immon.   | a         | a*        | a <sup>0</sup> | b               | b*        | b <sup>0</sup> | d         | d'       | Seq. | v         | w         | w'        | y                | y*        |
|----|----------|-----------|-----------|----------------|-----------------|-----------|----------------|-----------|----------|------|-----------|-----------|-----------|------------------|-----------|
| 1  | 110.0713 | 110.0713  |           |                | 138.0662        |           |                | 44.0495   |          | H    |           |           |           |                  |           |
| 2  | 74.0600  | 211.1190  |           | 193.1084       | <b>239.1139</b> |           | 221.1033       | 195.1240  | 197.1033 | T    | 1851.9599 | 1864.9803 | 1866.9596 | 1898.0018        | 1880.9753 |
| 3  | 86.0964  | 324.2030  |           | 306.1925       | <b>352.1979</b> |           | 334.1874       | 282.1561  |          | L    | 1738.8759 | 1737.8806 |           | 1796.9541        | 1779.9276 |
| 4  | 86.0964  | 437.2871  |           | 419.2765       | 465.2820        |           | 447.2714       | 409.2558  | 423.2714 | I    | 1625.7918 | 1638.8122 | 1652.8279 | <b>1683.8701</b> | 1666.8435 |
| 5  | 86.0964  | 550.3711  |           | 532.3606       | <b>578.3661</b> |           | 560.3555       | 522.3398  | 536.3555 | I    | 1512.7077 | 1525.7281 | 1539.7438 | <b>1570.7860</b> | 1553.7594 |
| 6  | 136.0757 | 713.4345  |           | 695.4239       | 741.4294        |           | 723.4188       |           |          | Y    | 1349.6444 |           |           | <b>1457.7019</b> | 1440.6754 |
| 7  | 88.0393  | 828.4614  |           | 810.4509       | 856.4563        |           | 838.4458       | 784.4716  |          | D    | 1234.6175 | 1233.6222 |           | <b>1294.6386</b> | 1277.6121 |
| 8  | 88.0393  | 943.4884  |           | 925.4778       | 971.4833        |           | 953.4727       | 899.4985  |          | D    | 1119.5905 | 1118.5953 |           | <b>1179.6117</b> | 1162.5851 |
| 9  | 86.0964  | 1056.5724 |           | 1038.5619      | 1084.5673       |           | 1066.5568      | 1014.5255 |          | L    | 1006.5065 | 1005.5112 |           | <b>1064.5847</b> | 1047.5582 |
| 10 | 60.0444  | 1143.6045 |           | 1125.5939      | 1171.5994       |           | 1153.5888      | 1127.6095 |          | S    | 919.4744  | 918.4792  |           | <b>951.5007</b>  | 934.4741  |
| 11 | 101.1073 | 1271.6994 | 1254.6729 | 1253.6888      | 1299.6943       | 1282.6678 | 1281.6838      | 1214.6416 |          | K    | 791.3795  | 790.3842  |           | <b>864.4686</b>  | 847.4421  |
| 12 | 101.0709 | 1399.7580 | 1382.7314 | 1381.7474      | 1427.7529       | 1410.7264 | 1409.7423      | 1342.7365 |          | Q    | 663.3209  | 662.3257  |           | <b>736.3737</b>  | 719.3471  |
| 13 | 44.0495  | 1470.7951 | 1453.7686 | 1452.7845      | 1498.7900       | 1481.7635 | 1480.7795      |           |          | A    | 592.2838  |           |           | <b>608.3151</b>  | 591.2885  |
| 14 | 101.0709 | 1598.8537 | 1581.8271 | 1580.8431      | 1626.8486       | 1609.8220 | 1608.8380      | 1541.8322 |          | Q    | 464.2252  | 463.2300  |           | 537.2780         | 520.2514  |
| 15 | 44.0495  | 1669.8908 | 1652.8642 | 1651.8802      | 1697.8857       | 1680.8592 | 1679.8751      |           |          | A    | 393.1881  |           |           | 409.2194         | 392.1928  |
| 16 | 136.0757 | 1832.9541 | 1815.9276 | 1814.9436      | 1860.9490       | 1843.9225 | 1842.9385      |           |          | Y    | 230.1248  |           |           | 338.1823         | 321.1557  |
| 17 | 129.1135 |           |           |                |                 |           |                |           |          | R    | 74.0237   | 73.0284   |           | <b>175.1190</b>  | 158.0924  |

| Seq   | ya       | yb       | Seq    | ya       | yb       | Seq  | ya       | yb              |
|-------|----------|----------|--------|----------|----------|------|----------|-----------------|
| TL    | 187.1441 | 215.1390 | TLI    | 300.2282 | 328.2231 | TLII | 413.3122 | <b>441.3071</b> |
| TLIIY | 576.3756 | 604.3705 | TLIIYD | 691.4025 | 719.3974 | LI   | 199.1805 | 227.1754        |
| LII   | 312.2646 | 340.2595 | LIY    | 475.3279 | 503.3228 | LIYD | 590.3548 | 618.3497        |
| II    | 199.1805 | 227.1754 | IY     | 362.2438 | 390.2387 | IYD  | 477.2708 | 505.2657        |

|        |          |          |        |          |          |         |          |          |
|--------|----------|----------|--------|----------|----------|---------|----------|----------|
| IYDD   | 592.2977 | 620.2926 | IY     | 249.1598 | 277.1547 | IYD     | 364.1867 | 392.1816 |
| IYDD   | 479.2136 | 507.2086 | IYDDL  | 592.2977 | 620.2926 | IYDDLS  | 679.3297 | 707.3246 |
| YD     | 251.1026 | 279.0975 | YDD    | 366.1296 | 394.1245 | YDDL    | 479.2136 | 507.2086 |
| YDDLS  | 566.2457 | 594.2406 | YDDLK  | 694.3406 | 722.3355 | DD      | 203.0662 | 231.0612 |
| DDL    | 316.1503 | 344.1452 | DDLK   | 403.1823 | 431.1773 | DDLK    | 531.2773 | 559.2722 |
| DDLKQ  | 659.3359 | 687.3308 | DL     | 201.1234 | 229.1183 | DLS     | 288.1554 | 316.1503 |
| DLSK   | 416.2504 | 444.2453 | DLSKQ  | 544.3089 | 572.3039 | DLSKQA  | 615.3461 | 643.3410 |
| LS     | 173.1285 | 201.1234 | LSK    | 301.2234 | 329.2183 | LSKQ    | 429.2820 | 457.2769 |
| LSKQA  | 500.3191 | 528.3140 | LSKQAQ | 628.3777 | 656.3726 | LSKQAQA | 699.4148 | 727.4097 |
| SK     | 188.1394 | 216.1343 | SKQ    | 316.1979 | 344.1928 | SKQA    | 387.2350 | 415.2300 |
| SKQAQ  | 515.2936 | 543.2885 | SKQAQA | 586.3307 | 614.3257 | KQ      | 229.1659 | 257.1608 |
| KQA    | 300.2030 | 328.1979 | KQAQ   | 428.2616 | 456.2565 | KQAQA   | 499.2987 | 527.2936 |
| KQAQAY | 662.3620 | 690.3570 | QA     | 172.1081 | 200.1030 | QAQ     | 300.1666 | 328.1615 |
| QAQA   | 371.2037 | 399.1987 | QAQAY  | 534.2671 | 562.2620 | AQ      | 172.1081 | 200.1030 |
| AQA    | 243.1452 | 271.1401 | AQAY   | 406.2085 | 434.2034 | QA      | 172.1081 | 200.1030 |
| QAY    | 335.1714 | 363.1663 | AY     | 207.1128 | 235.1077 |         |          |          |

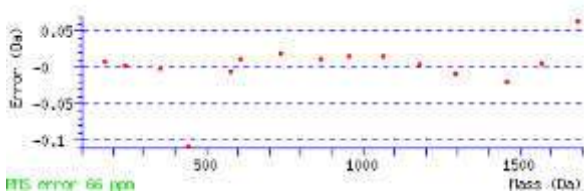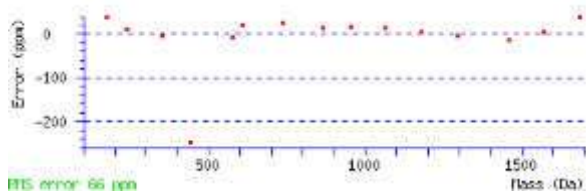

NCBI BLAST search of [HTLIYDDLKQQAQAYR](#)

(Parameters: blastp, nr protein database, expect=20000, no filter, PAM30)

Other BLAST [web gateways](#)

#### All matches to this query

| Score | Mr(calc)  | Delta   | Sequence                              |
|-------|-----------|---------|---------------------------------------|
| 89.9  | 2034.0534 | 0.1170  | <a href="#">HTLIYDDLKQQAQAYR</a>      |
| 13.3  | 2034.0534 | 0.1170  | <a href="#">HTLVIYDDLTKQAQAYR</a>     |
| 9.9   | 2033.0694 | 1.1010  | <a href="#">GSFYATDLDLVLHTRGIR</a>    |
| 9.7   | 2033.9768 | 0.1936  | <a href="#">LVFMGGGSYSFDLEDLLR</a>    |
| 8.9   | 2033.9906 | 0.1799  | <a href="#">TYSLPSSVNDQTPDLELR</a>    |
| 7.8   | 2033.0518 | 1.1186  | <a href="#">ASMKLAPFFFGPYLIMGK</a>    |
| 7.2   | 2035.0051 | -0.8346 | <a href="#">EHFDLSOPAFLOIAEYK</a>     |
| 6.6   | 2033.0438 | 1.1267  | <a href="#">YMPTLATAGLPAGMLAAAAAR</a> |
| 6.6   | 2034.0357 | 0.1347  | <a href="#">VGEFKPPTPSGRMDFTLR</a>    |
| 6.4   | 2033.0188 | 1.1516  | <a href="#">ASMKLAPMFFGPYLIMGK</a>    |

Mascot: <http://www.matrixscience.com/>


**Mascot Search Results**
**Peptide View Spot no 97**

 MS/MS Fragmentation of **IIGLGEIMSGELVEFAEGTR**

 Found in **gi11466784** in **NCBI**nr, ATP synthase CF1 alpha subunit [Oryza sativa Japonica Group]

Match to Query 78: 2120.200724 from(2121.208000,1+) intensity(0.0000) index(21)

Title: Label: I11, Spot\_Id: 216645, Peak\_List\_Id: 221395, MSMS Job\_Run\_Id: 21364, Comment:

Data file C:\Documents and Settings\Administrator\Desktop\farah BHU\Akansha BHU\RAJESH\12-1-13 raj\ppw\_I11\_136074508400.txt

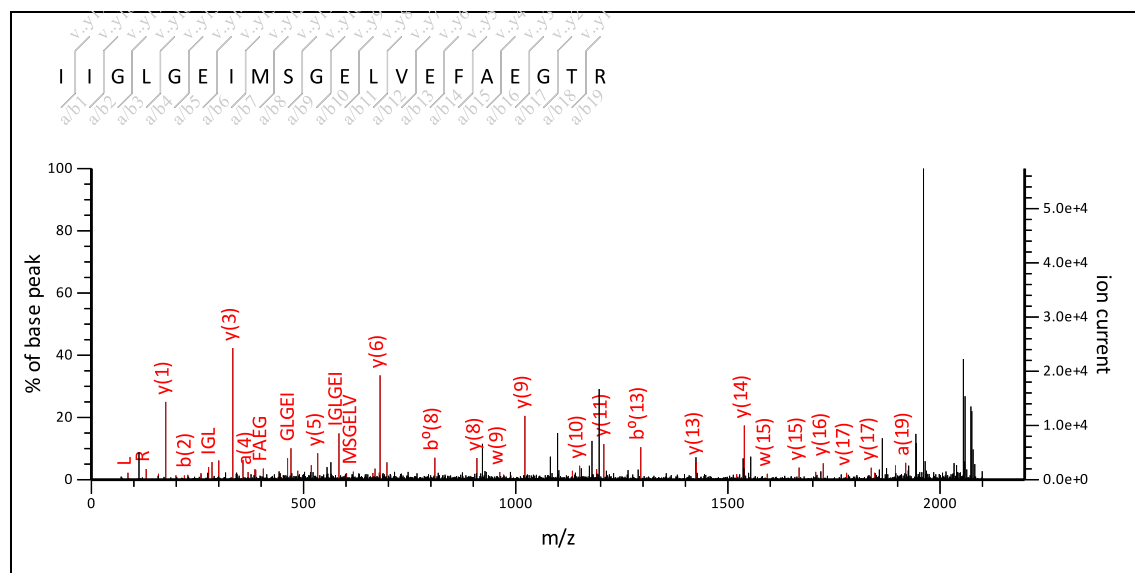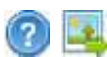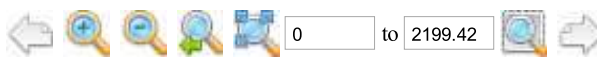
 Label all possible matches  Label matches used for scoring 

Monoisotopic mass of neutral peptide Mr(calc): 2120.0823

Fixed modifications: Carbamidomethyl (C) (apply to specified residues or termini only)

Ions Score: 107 Expect: 6.2e-08

 Matches : 81/345 fragment ions using 126 most intense peaks ([help](#))

| #  | Immon.   | a         | a <sup>0</sup> | b         | b <sup>0</sup> | d         | d'        | Seq. | v         | w         | w'        | y         | y*        | y <sup>0</sup> | #  |
|----|----------|-----------|----------------|-----------|----------------|-----------|-----------|------|-----------|-----------|-----------|-----------|-----------|----------------|----|
| 1  | 86.0964  | 86.0964   |                | 114.0913  |                | 44.0495   |           | I    |           |           |           |           |           |                | 20 |
| 2  | 86.0964  | 199.1805  |                | 227.1754  |                | 171.1492  | 185.1648  | I    | 1949.9273 | 1962.9477 | 1976.9634 | 2008.0056 | 1990.9790 | 1989.9950      | 19 |
| 3  | 30.0338  | 256.2020  |                | 284.1969  |                |           |           | G    |           |           |           | 1894.9215 | 1877.8950 | 1876.9109      | 18 |
| 4  | 86.0964  | 369.2860  |                | 397.2809  |                | 327.2391  |           | L    | 1779.8218 | 1778.8265 |           | 1837.9000 | 1820.8735 | 1819.8895      | 17 |
| 5  | 30.0338  | 426.3075  |                | 454.3024  |                |           |           | G    |           |           |           | 1724.8160 | 1707.7894 | 1706.8054      | 16 |
| 6  | 102.0550 | 555.3501  | 537.3395       | 583.3450  | 565.3344       | 497.3446  |           | E    | 1593.7577 | 1592.7625 |           | 1667.7945 | 1650.7680 | 1649.7839      | 15 |
| 7  | 86.0964  | 668.4341  | 650.4236       | 696.4291  | 678.4185       | 640.4028  | 654.4185  | I    | 1480.6737 | 1493.6941 | 1507.7097 | 1538.7519 | 1521.7254 | 1520.7414      | 14 |
| 8  | 104.0528 | 799.4746  | 781.4641       | 827.4695  | 809.4590       | 739.4713  |           | M    | 1349.6332 | 1348.6379 |           | 1425.6679 | 1408.6413 | 1407.6573      | 13 |
| 9  | 60.0444  | 886.5067  | 868.4961       | 914.5016  | 896.4910       | 870.5117  |           | S    | 1262.6012 | 1261.6059 |           | 1294.6274 | 1277.6008 | 1276.6168      | 12 |
| 10 | 30.0338  | 943.5281  | 925.5176       | 971.5230  | 953.5125       |           |           | G    |           |           |           | 1207.5953 | 1190.5688 | 1189.5848      | 11 |
| 11 | 102.0550 | 1072.5707 | 1054.5601      | 1100.5656 | 1082.5551      | 1014.5652 |           | E    | 1076.5371 | 1075.5419 |           | 1150.5739 | 1133.5473 | 1132.5633      | 10 |
| 12 | 86.0964  | 1185.6548 | 1167.6442      | 1213.6497 | 1195.6391      | 1143.6078 |           | L    | 963.4530  | 962.4578  |           | 1021.5313 | 1004.5047 | 1003.5207      | 9  |
| 13 | 72.0808  | 1284.7232 | 1266.7126      | 1312.7181 | 1294.7075      | 1270.7075 |           | V    | 864.3846  | 877.4050  |           | 908.4472  | 891.4207  | 890.4367       | 8  |
| 14 | 102.0550 | 1413.7658 | 1395.7552      | 1441.7607 | 1423.7501      | 1355.7603 |           | E    | 735.3420  | 734.3468  |           | 809.3788  | 792.3523  | 791.3682       | 7  |
| 15 | 120.0808 | 1560.8342 | 1542.8236      | 1588.8291 | 1570.8185      |           |           | F    | 588.2736  |           |           | 680.3362  | 663.3097  | 662.3257       | 6  |
| 16 | 44.0495  | 1631.8713 | 1613.8607      | 1659.8662 | 1641.8557      |           |           | A    | 517.2365  |           |           | 533.2678  | 516.2413  | 515.2572       | 5  |
| 17 | 102.0550 | 1760.9139 | 1742.9033      | 1788.9088 | 1770.8983      | 1702.9084 |           | E    | 388.1939  | 387.1987  |           | 462.2307  | 445.2041  | 444.2201       | 4  |
| 18 | 30.0338  | 1817.9354 | 1799.9248      | 1845.9303 | 1827.9197      |           |           | G    |           |           |           | 333.1881  | 316.1615  | 315.1775       | 3  |
| 19 | 74.0600  | 1918.9830 | 1900.9725      | 1946.9780 | 1928.9674      | 1902.9881 | 1904.9674 | T    | 230.1248  | 243.1452  | 245.1244  | 276.1666  | 259.1401  | 258.1561       | 2  |

|    |          |  |  |  |  |   |         |         |          |          |   |
|----|----------|--|--|--|--|---|---------|---------|----------|----------|---|
| 20 | 129.1135 |  |  |  |  | R | 74.0237 | 73.0284 | 175.1190 | 158.0924 | 1 |
|----|----------|--|--|--|--|---|---------|---------|----------|----------|---|

| Seq    | ya       | yb       | Seq    | ya       | yb       | Seq     | ya       | yb       |
|--------|----------|----------|--------|----------|----------|---------|----------|----------|
| IG     | 143.1179 | 171.1128 | IGL    | 256.2020 | 284.1969 | IGLG    | 313.2234 | 341.2183 |
| IGLGE  | 442.2660 | 470.2609 | IGLGEI | 555.3501 | 583.3450 | IGLGEIM | 686.3906 | 714.3855 |
| GL     | 143.1179 | 171.1128 | GLG    | 200.1394 | 228.1343 | GLGE    | 329.1819 | 357.1769 |
| GLGEI  | 442.2660 | 470.2609 | GLGEIM | 573.3065 | 601.3014 | GLGEIMS | 660.3385 | 688.3334 |
| LG     | 143.1179 | 171.1128 | LGE    | 272.1605 | 300.1554 | LGEI    | 385.2445 | 413.2395 |
| LGEIM  | 516.2850 | 544.2799 | LGEIMS | 603.3171 | 631.3120 | LGEIMSG | 660.3385 | 688.3334 |
| GE     | 159.0764 | 187.0713 | GEI    | 272.1605 | 300.1554 | GEIM    | 403.2010 | 431.1959 |
| GEIMS  | 490.2330 | 518.2279 | GEIMSG | 547.2545 | 575.2494 | GEIMSGE | 676.2971 | 704.2920 |
| EI     | 215.1390 | 243.1339 | EIM    | 346.1795 | 374.1744 | EIMS    | 433.2115 | 461.2064 |
| EIMSG  | 490.2330 | 518.2279 | EIMSGE | 619.2756 | 647.2705 | IM      | 217.1369 | 245.1318 |
| IMS    | 304.1689 | 332.1639 | IMSG   | 361.1904 | 389.1853 | IMSGE   | 490.2330 | 518.2279 |
| IMSGEL | 603.3171 | 631.3120 | MS     | 191.0849 | 219.0798 | MSG     | 248.1063 | 276.1013 |
| MSGEL  | 377.1489 | 405.1438 | MSGEL  | 490.2330 | 518.2279 | MSGELV  | 589.3014 | 617.2963 |
| SG     | 117.0659 | 145.0608 | SGE    | 246.1084 | 274.1034 | SGEL    | 359.1925 | 387.1874 |
| SGELV  | 458.2609 | 486.2558 | SGELVE | 587.3035 | 615.2984 | GE      | 159.0764 | 187.0713 |
| GEL    | 272.1605 | 300.1554 | GELV   | 371.2289 | 399.2238 | GELVE   | 500.2715 | 528.2664 |
| GELVEF | 647.3399 | 675.3348 | EL     | 215.1390 | 243.1339 | ELV     | 314.2074 | 342.2023 |
| ELVE   | 443.2500 | 471.2449 | ELVEF  | 590.3184 | 618.3134 | ELVEFA  | 661.3556 | 689.3505 |
| LV     | 185.1648 | 213.1598 | LVE    | 314.2074 | 342.2023 | LVEF    | 461.2758 | 489.2708 |
| LVEFA  | 532.3130 | 560.3079 | LVEFAE | 661.3556 | 689.3505 | VE      | 201.1234 | 229.1183 |
| VEF    | 348.1918 | 376.1867 | VEFA   | 419.2289 | 447.2238 | VEFAE   | 548.2715 | 576.2664 |
| VEFAEG | 605.2930 | 633.2879 | EF     | 249.1234 | 277.1183 | EFA     | 320.1605 | 348.1554 |
| EFAE   | 449.2031 | 477.1980 | EFAEG  | 506.2245 | 534.2195 | EFAEGT  | 607.2722 | 635.2671 |
| FA     | 191.1179 | 219.1128 | FAE    | 320.1605 | 348.1554 | FAEG    | 377.1819 | 405.1769 |
| FAEGT  | 478.2296 | 506.2245 | AE     | 173.0921 | 201.0870 | AEG     | 230.1135 | 258.1084 |
| AEGT   | 331.1612 | 359.1561 | EG     | 159.0764 | 187.0713 | EGT     | 260.1241 | 288.1190 |
| GT     | 131.0815 | 159.0764 |        |          |          |         |          |          |

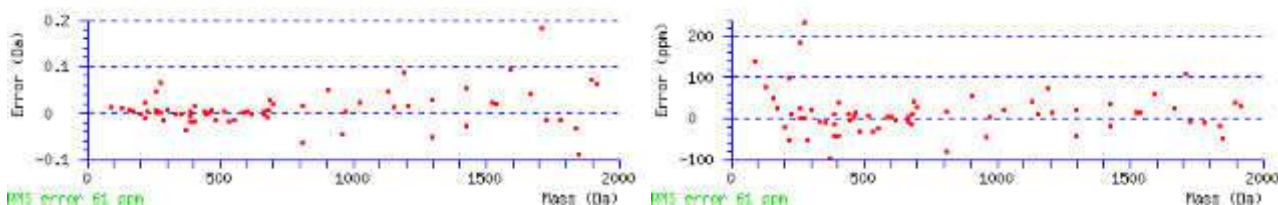

NCBI BLAST search of [IIGLGEIMSGELVEFAEGTR](#)  
 (Parameters: blastp, nr protein database, expect=20000, no filter, PAM30)  
 Other BLAST [web gateways](#)

All matches to this query

| Score | Mr(calc)  | Delta   | Sequence                             |
|-------|-----------|---------|--------------------------------------|
| 107.1 | 2120.0823 | 0.1184  | <a href="#">IIGLGEIMSGELVEFAEGTR</a> |
| 57.8  | 2119.0983 | 1.1024  | <a href="#">IIGLGOIMSGELVEFAEGTR</a> |
| 28.2  | 2119.1347 | 1.0660  | <a href="#">IIGLGEIMSGELVKFAEGTR</a> |
| 28.2  | 2119.0983 | 1.1024  | <a href="#">IIGLGEIMSGELVQFAEGTR</a> |
| 11.1  | 2119.1473 | 1.0534  | <a href="#">SWHRAGVLLLGAQSCLPVR</a>  |
| 10.9  | 2121.0717 | -0.8710 | <a href="#">WMHELNEFKQVIESLDSK</a>   |
| 10.8  | 2121.0875 | -0.8868 | <a href="#">LLDSGMEKLVDDTSTLLSGK</a> |
| 10.7  | 2120.0969 | 0.1038  | <a href="#">CLLTLLMSTAAIPGGESRK</a>  |
| 10.6  | 2121.2045 | -1.0038 | <a href="#">AGEVLIPTIDDTLPIALRK</a>  |

|      |           |        |                                       |
|------|-----------|--------|---------------------------------------|
| 10.3 | 2120.0175 | 0.1833 | <a href="#">TAPSGPWSATSGLDPISSESR</a> |
|------|-----------|--------|---------------------------------------|

|                                                                                          |
|------------------------------------------------------------------------------------------|
| <b>Mascot:</b> <a href="http://www.matrixscience.com/">http://www.matrixscience.com/</a> |
|------------------------------------------------------------------------------------------|




**Mascot Search Results**
**Peptide View Spot no 97**
MS/MS Fragmentation of **IIGLGEIMSGELVEFAEGTR**Found in **gi11466784** in **NCBI**nr, ATP synthase CF1 alpha subunit [Oryza sativa Japonica Group]

Match to Query 80: 2136.190724 from(2137.198000,1+) intensity(0.0000) index(22)

Title: Label: I11, Spot\_Id: 216645, Peak\_List\_Id: 221413, MSMS Job\_Run\_Id: 21364, Comment:

Data file C:\Documents and Settings\Administrator\Desktop\farah BHU\Akansha BHU\RAJESH\12-1-13 raj\ppw\_I11\_136074508400.txt

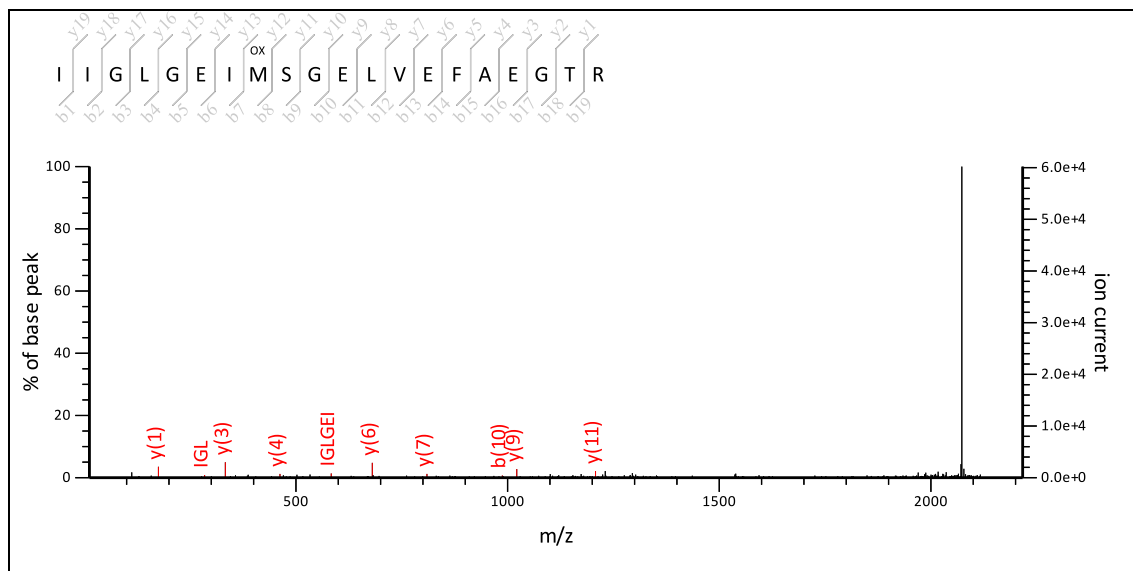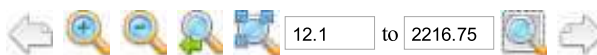Label all possible matches  Label matches used for scoring Monoisotopic mass of neutral peptide  $M_r(\text{calc})$ : 2136.0773

Fixed modifications: Carbamidomethyl (C) (apply to specified residues or termini only)

Variable modifications:

M8 : Oxidation (M), with neutral losses 0.0000 (shown in table), 63.9983

Ions Score: 37 Expect: 0.6

Matches : 15/473 fragment ions using 21 most intense peaks ([help](#))

| #  | Immon.   | a         | a <sup>0</sup> | b               | b <sup>0</sup> | d         | d'       | Seq. | v         | w         | w'        | y                | y*        | y <sup>0</sup> | #  |
|----|----------|-----------|----------------|-----------------|----------------|-----------|----------|------|-----------|-----------|-----------|------------------|-----------|----------------|----|
| 1  | 86.0964  | 86.0964   |                | 114.0913        |                | 44.0495   |          | I    |           |           |           |                  |           |                | 20 |
| 2  | 86.0964  | 199.1805  |                | 227.1754        |                | 171.1492  | 185.1648 | I    | 1965.9222 | 1978.9426 | 1992.9583 | 2024.0005        | 2006.9739 | 2005.9899      | 19 |
| 3  | 30.0338  | 256.2020  |                | <b>284.1969</b> |                |           |          | G    |           |           |           | 1910.9164        | 1893.8899 | 1892.9059      | 18 |
| 4  | 86.0964  | 369.2860  |                | 397.2809        |                | 327.2391  |          | L    | 1795.8167 | 1794.8215 |           | 1853.8950        | 1836.8684 | 1835.8844      | 17 |
| 5  | 30.0338  | 426.3075  |                | 454.3024        |                |           |          | G    |           |           |           | 1740.8109        | 1723.7843 | 1722.8003      | 16 |
| 6  | 102.0550 | 555.3501  | 537.3395       | <b>583.3450</b> | 565.3344       | 497.3446  |          | E    | 1609.7527 | 1608.7574 |           | 1683.7894        | 1666.7629 | 1665.7789      | 15 |
| 7  | 86.0964  | 668.4341  | 650.4236       | 696.4291        | 678.4185       | 640.4028  | 654.4185 | I    | 1496.6686 | 1509.6890 | 1523.7046 | 1554.7468        | 1537.7203 | 1536.7363      | 14 |
| 8  | 120.0478 | 815.4695  | 797.4590       | 843.4645        | 825.4539       | 739.4713  |          | M    | 1349.6332 | 1348.6379 |           | 1441.6628        | 1424.6362 | 1423.6522      | 13 |
| 9  | 60.0444  | 902.5016  | 884.4910       | 930.4965        | 912.4859       | 886.5067  |          | S    | 1262.6012 | 1261.6059 |           | 1294.6274        | 1277.6008 | 1276.6168      | 12 |
| 10 | 30.0338  | 959.5230  | 941.5125       | <b>987.5179</b> | 969.5074       |           |          | G    |           |           |           | <b>1207.5953</b> | 1190.5688 | 1189.5848      | 11 |
| 11 | 102.0550 | 1088.5656 | 1070.5551      | 1116.5605       | 1098.5500      | 1030.5601 |          | E    | 1076.5371 | 1075.5419 |           | 1150.5739        | 1133.5473 | 1132.5633      | 10 |
| 12 | 86.0964  | 1201.6497 | 1183.6391      | 1229.6446       | 1211.6340      | 1159.6027 |          | L    | 963.4530  | 962.4578  |           | <b>1021.5313</b> | 1004.5047 | 1003.5207      | 9  |
| 13 | 72.0808  | 1300.7181 | 1282.7075      | 1328.7130       | 1310.7025      | 1286.7025 |          | V    | 864.3846  | 877.4050  |           | 908.4472         | 891.4207  | 890.4367       | 8  |
| 14 | 102.0550 | 1429.7607 | 1411.7501      | 1457.7556       | 1439.7450      | 1371.7552 |          | E    | 735.3420  | 734.3468  |           | <b>809.3788</b>  | 792.3523  | 791.3682       | 7  |
| 15 | 120.0808 | 1576.8291 | 1558.8185      | 1604.8240       | 1586.8135      |           |          | F    | 588.2736  |           |           | <b>680.3362</b>  | 663.3097  | 662.3257       | 6  |
| 16 | 44.0495  | 1647.8662 | 1629.8557      | 1675.8611       | 1657.8506      |           |          | A    | 517.2365  |           |           | 533.2678         | 516.2413  | 515.2572       | 5  |
| 17 | 102.0550 | 1776.9088 | 1758.8983      | 1804.9037       | 1786.8932      | 1718.9033 |          | E    | 388.1939  | 387.1987  |           | <b>462.2307</b>  | 445.2041  | 444.2201       | 4  |

|    |          |           |           |           |           |           |           |   |          |          |          |          |          |          |          |          |   |
|----|----------|-----------|-----------|-----------|-----------|-----------|-----------|---|----------|----------|----------|----------|----------|----------|----------|----------|---|
| 18 | 30.0338  | 1833.9303 | 1815.9197 | 1861.9252 | 1843.9146 |           |           |   | G        |          |          |          |          | 333.1881 | 316.1615 | 315.1775 | 3 |
| 19 | 74.0600  | 1934.9780 | 1916.9674 | 1962.9729 | 1944.9623 | 1918.9830 | 1920.9623 | T | 230.1248 | 243.1452 | 245.1244 | 276.1666 | 259.1401 | 258.1561 |          |          | 2 |
| 20 | 129.1135 |           |           |           |           |           |           | R | 74.0237  | 73.0284  |          | 175.1190 | 158.0924 |          |          |          | 1 |

| Seq    | ya       | yb       | Seq     | ya       | yb       | Seq    | ya       | yb       |
|--------|----------|----------|---------|----------|----------|--------|----------|----------|
| IG     | 143.1179 | 171.1128 | IGL     | 256.2020 | 284.1969 | IGLG   | 313.2234 | 341.2183 |
| IGLGE  | 442.2660 | 470.2609 | IGLGEI  | 555.3501 | 583.3450 | GL     | 143.1179 | 171.1128 |
| GLG    | 200.1394 | 228.1343 | GLGE    | 329.1819 | 357.1769 | GLGEI  | 442.2660 | 470.2609 |
| GLGEIM | 589.3014 | 617.2963 | GLGEIMS | 676.3334 | 704.3284 | LG     | 143.1179 | 171.1128 |
| LGE    | 272.1605 | 300.1554 | LGEI    | 385.2445 | 413.2395 | LGEIM  | 532.2799 | 560.2749 |
| LGEIMS | 619.3120 | 647.3069 | LGEIMSG | 676.3334 | 704.3284 | GE     | 159.0764 | 187.0713 |
| GEI    | 272.1605 | 300.1554 | GEIM    | 419.1959 | 447.1908 | GEIMS  | 506.2279 | 534.2228 |
| GEIMSG | 563.2494 | 591.2443 | GEIMSGE | 692.2920 | 720.2869 | EI     | 215.1390 | 243.1339 |
| EIM    | 362.1744 | 390.1693 | EIMS    | 449.2064 | 477.2014 | EIMSG  | 506.2279 | 534.2228 |
| EIMSGE | 635.2705 | 663.2654 | IM      | 233.1318 | 261.1267 | IMS    | 320.1639 | 348.1588 |
| IMSG   | 377.1853 | 405.1802 | IMSGE   | 506.2279 | 534.2228 | IMSGEL | 619.3120 | 647.3069 |
| MS     | 207.0798 | 235.0747 | MSG     | 264.1013 | 292.0962 | MSGE   | 393.1438 | 421.1388 |
| MSGEL  | 506.2279 | 534.2228 | MSGELV  | 605.2963 | 633.2912 | SG     | 117.0659 | 145.0608 |
| SGE    | 246.1084 | 274.1034 | SGEL    | 359.1925 | 387.1874 | SGELV  | 458.2609 | 486.2558 |
| SGELVE | 587.3035 | 615.2984 | GE      | 159.0764 | 187.0713 | GEL    | 272.1605 | 300.1554 |
| GELV   | 371.2289 | 399.2238 | GELVE   | 500.2715 | 528.2664 | GELVEF | 647.3399 | 675.3348 |
| EL     | 215.1390 | 243.1339 | ELV     | 314.2074 | 342.2023 | ELVE   | 443.2500 | 471.2449 |
| ELVEF  | 590.3184 | 618.3134 | ELVEFA  | 661.3556 | 689.3505 | LV     | 185.1648 | 213.1598 |
| LVE    | 314.2074 | 342.2023 | LVEF    | 461.2758 | 489.2708 | LVEFA  | 532.3130 | 560.3079 |
| LVEFAE | 661.3556 | 689.3505 | VE      | 201.1234 | 229.1183 | VEF    | 348.1918 | 376.1867 |
| VEFA   | 419.2289 | 447.2238 | VEFAE   | 548.2715 | 576.2664 | VEFAEG | 605.2930 | 633.2879 |
| EF     | 249.1234 | 277.1183 | EFA     | 320.1605 | 348.1554 | EFAE   | 449.2031 | 477.1980 |
| EFAEG  | 506.2245 | 534.2195 | EFAEGT  | 607.2722 | 635.2671 | FA     | 191.1179 | 219.1128 |
| FAE    | 320.1605 | 348.1554 | FAEG    | 377.1819 | 405.1769 | FAEGT  | 478.2296 | 506.2245 |
| AE     | 173.0921 | 201.0870 | AEG     | 230.1135 | 258.1084 | AEGT   | 331.1612 | 359.1561 |
| EG     | 159.0764 | 187.0713 | EGT     | 260.1241 | 288.1190 | GT     | 131.0815 | 159.0764 |

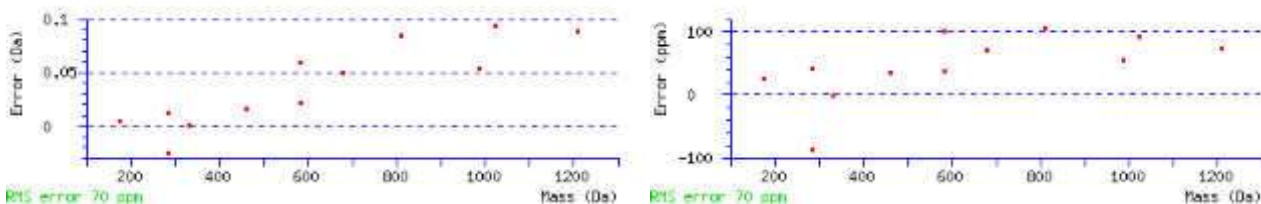

NCBI BLAST search of [IIGLGEIMSGELVEFAEGTR](#)  
 (Parameters: blastp, nr protein database, expect=20000, no filter, PAM30)  
 Other BLAST [web gateways](#)

All matches to this query

| Score | Mr(calc)  | Delta   | Sequence                             |
|-------|-----------|---------|--------------------------------------|
| 37.3  | 2136.0773 | 0.1135  | <a href="#">IIGLGEIMSGELVEFAEGTR</a> |
| 27.2  | 2135.0932 | 1.0975  | <a href="#">IIGLGOIMSGELVEFAEGTR</a> |
| 11.4  | 2136.2307 | -0.0399 | <a href="#">LATLALILVLVSFHSPEAR</a>  |
| 9.5   | 2136.0898 | 0.1009  | <a href="#">SHGRVVVNASVESWLPMR</a>   |
| 9.2   | 2136.0198 | 0.1709  | <a href="#">KDLFTGTYMPSTELTGGER</a>  |
| 9.1   | 2135.9793 | 0.2114  | <a href="#">SNYAFSMLTGRGSEASISDK</a> |
| 8.8   | 2137.1354 | -0.9447 | <a href="#">GPWKNPVLEMIQVVNLR</a>    |
| 8.0   | 2135.0854 | 1.1054  | <a href="#">VIRGSFFANGWLWSWGR</a>    |
| 7.7   | 2136.0496 | 0.1411  | <a href="#">QLIGPAMYEGLMGDGPIGR</a>  |

|     |           |        |                                      |
|-----|-----------|--------|--------------------------------------|
| 7.7 | 2136.0125 | 0.1782 | <a href="#">SLMMPGSPSEAGLSRSLMNR</a> |
|-----|-----------|--------|--------------------------------------|

|                                                                                          |
|------------------------------------------------------------------------------------------|
| <b>Mascot:</b> <a href="http://www.matrixscience.com/">http://www.matrixscience.com/</a> |
|------------------------------------------------------------------------------------------|

**MATRIX SCIENCE Mascot Search Results**

**Peptide View Spot no 97**

MS/MS Fragmentation of **VINALAKPIDGRGEIVASESR**

Found in **gi|11466784** in **NCBI**nr, ATP synthase CF1 alpha subunit [Oryza sativa Japonica Group]

Match to Query 88: 2194.327924 from(2195.335200,1+) intensity(0.0000) index(24)

Title: Label: I11, Spot\_Id: 216645, Peak\_List\_Id: 221393, MSMS Job\_Run\_Id: 21364, Comment:

Data file C:\Documents and Settings\Administrator\Desktop\farah BHU\Akansha BHU\RAJESH\12-1-13 raj\ppw\_I11\_136074508400.txt

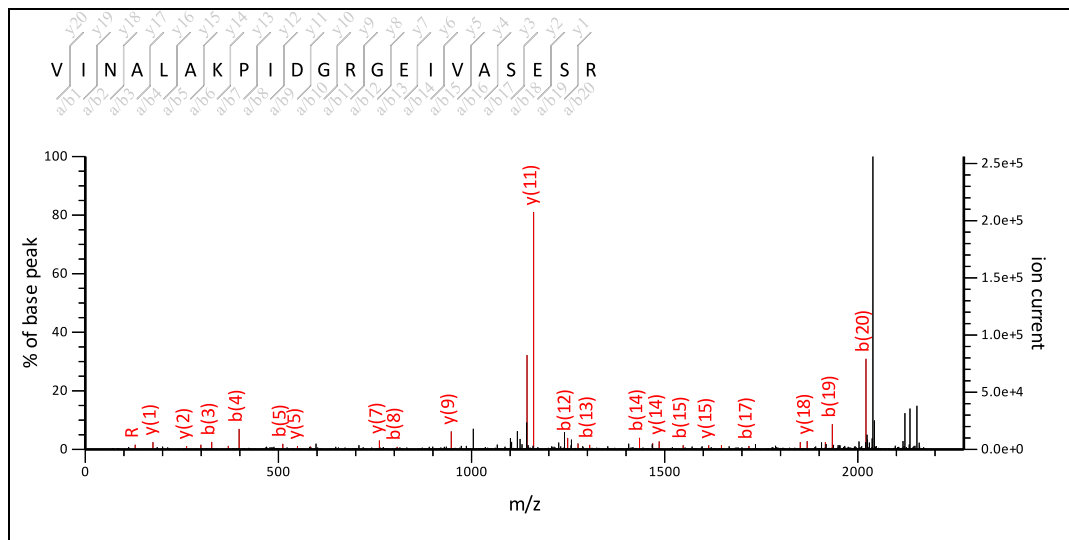

Navigation icons: Home, Back, Forward, Search, Print, Refresh. Search range: 0 to 2274.56

Label all possible matches  Label matches used for scoring

Monoisotopic mass of neutral peptide Mr(calc): 2194.2069

Fixed modifications: Carbamidomethyl (C) (apply to specified residues or termini only)

Ions Score: 98 Expect: 4.2e-07

Matches : 37/406 fragment ions using 44 most intense peaks [\(help\)](#)

| #  | Immon.   | a         | a*        | a <sup>0</sup> | b         | b*        | b <sup>0</sup> | d         | d'        | Seq. | v         | w         | w'        | y         | y*        |
|----|----------|-----------|-----------|----------------|-----------|-----------|----------------|-----------|-----------|------|-----------|-----------|-----------|-----------|-----------|
| 1  | 72.0808  | 72.0808   |           |                | 100.0757  |           |                | 44.0495   |           | V    |           |           |           |           |           |
| 2  | 86.0964  | 185.1648  |           |                | 213.1598  |           |                | 157.1335  | 171.1492  | I    | 2038.0676 | 2051.0880 | 2065.1036 | 2096.1458 | 2079.1193 |
| 3  | 87.0553  | 299.2078  | 282.1812  |                | 327.2027  | 310.1761  |                | 256.2020  |           | N    | 1924.0247 | 1923.0294 |           | 1983.0618 | 1966.0352 |
| 4  | 44.0495  | 370.2449  | 353.2183  |                | 398.2398  | 381.2132  |                |           |           | A    | 1852.9876 |           |           | 1869.0189 | 1851.9923 |
| 5  | 86.0964  | 483.3289  | 466.3024  |                | 511.3239  | 494.2973  |                | 441.2820  |           | L    | 1739.9035 | 1738.9082 |           | 1797.9817 | 1780.9552 |
| 6  | 44.0495  | 554.3661  | 537.3395  |                | 582.3610  | 565.3344  |                |           |           | A    | 1668.8664 |           |           | 1684.8977 | 1667.8711 |
| 7  | 101.1073 | 682.4610  | 665.4345  |                | 710.4559  | 693.4294  |                | 625.4032  |           | K    | 1540.7714 | 1539.7762 |           | 1613.8606 | 1596.8340 |
| 8  | 70.0651  | 779.5138  | 762.4872  |                | 807.5087  | 790.4822  |                | 753.4981  |           | P    | 1443.7186 | 1442.7234 |           | 1485.7656 | 1468.7390 |
| 9  | 86.0964  | 892.5978  | 875.5713  |                | 920.5928  | 903.5662  |                | 864.5665  | 878.5822  | I    | 1330.6346 | 1343.6550 | 1357.6706 | 1388.7128 | 1371.6863 |
| 10 | 88.0393  | 1007.6248 | 990.5982  | 989.6142       | 1035.6197 | 1018.5932 | 1017.6091      | 963.6350  |           | D    | 1215.6076 | 1214.6124 |           | 1275.6288 | 1258.6022 |
| 11 | 30.0338  | 1064.6463 | 1047.6197 | 1046.6357      | 1092.6412 | 1075.6146 | 1074.6306      |           |           | G    |           |           |           | 1160.6018 | 1143.5753 |
| 12 | 129.1135 | 1220.7474 | 1203.7208 | 1202.7368      | 1248.7423 | 1231.7157 | 1230.7317      | 1135.6834 |           | R    | 1002.4851 | 1001.4898 |           | 1103.5804 | 1086.5538 |
| 13 | 30.0338  | 1277.7688 | 1260.7423 | 1259.7583      | 1305.7637 | 1288.7372 | 1287.7532      |           |           | G    |           |           |           | 947.4793  | 930.4527  |
| 14 | 102.0550 | 1406.8114 | 1389.7849 | 1388.8009      | 1434.8063 | 1417.7798 | 1416.7958      | 1348.8059 |           | E    | 816.4210  | 815.4258  |           | 890.4578  | 873.4312  |
| 15 | 86.0964  | 1519.8955 | 1502.8689 | 1501.8849      | 1547.8904 | 1530.8639 | 1529.8798      | 1491.8642 | 1505.8798 | I    | 703.3369  | 716.3573  | 730.3730  | 761.4152  | 744.3886  |
| 16 | 72.0808  | 1618.9639 | 1601.9374 | 1600.9533      | 1646.9588 | 1629.9323 | 1628.9483      | 1604.9483 |           | V    | 604.2685  | 617.2889  |           | 648.3311  | 631.3046  |
| 17 | 44.0495  | 1690.0010 | 1672.9745 | 1671.9905      | 1717.9959 | 1700.9694 | 1699.9854      |           |           | A    | 533.2314  |           |           | 549.2627  | 532.2362  |
| 18 | 60.0444  | 1777.0330 | 1760.0065 | 1759.0225      | 1805.0280 | 1788.0014 | 1787.0174      | 1761.0381 |           | S    | 446.1994  | 445.2041  |           | 478.2256  | 461.1991  |
| 19 | 102.0550 | 1906.0756 | 1889.0491 | 1888.0651      | 1934.0706 | 1917.0440 | 1916.0600      | 1848.0702 |           | E    | 317.1568  | 316.1615  |           | 391.1936  | 374.1670  |
| 20 | 60.0444  | 1993.1077 | 1976.0811 | 1975.0971      | 2021.1026 | 2004.0760 | 2003.0920      | 1977.1128 |           | S    | 230.1248  | 229.1295  |           | 262.1510  | 245.1244  |
| 21 | 129.1135 |           |           |                |           |           |                |           |           | R    | 74.0237   | 73.0284   |           | 175.1190  | 158.0924  |

| Seq | ya | yb | Seq | ya | yb | Seq | ya | yb |
|-----|----|----|-----|----|----|-----|----|----|
|-----|----|----|-----|----|----|-----|----|----|

|         |          |          |         |          |          |         |          |          |
|---------|----------|----------|---------|----------|----------|---------|----------|----------|
| IN      | 200.1394 | 228.1343 | INA     | 271.1765 | 299.1714 | INAL    | 384.2605 | 412.2554 |
| INALA   | 455.2976 | 483.2926 | INALAK  | 583.3926 | 611.3875 | INALAKP | 680.4454 | 708.4403 |
| NA      | 158.0924 | 186.0873 | NAL     | 271.1765 | 299.1714 | NALA    | 342.2136 | 370.2085 |
| NALAK   | 470.3085 | 498.3035 | NALAKP  | 567.3613 | 595.3562 | NALAKPI | 680.4454 | 708.4403 |
| AL      | 157.1335 | 185.1285 | ALA     | 228.1707 | 256.1656 | ALAK    | 356.2656 | 384.2605 |
| ALAKP   | 453.3184 | 481.3133 | ALAKPI  | 566.4024 | 594.3974 | ALAKPID | 681.4294 | 709.4243 |
| LA      | 157.1335 | 185.1285 | LAK     | 285.2285 | 313.2234 | LAKP    | 382.2813 | 410.2762 |
| LAKPI   | 495.3653 | 523.3602 | LAKPID  | 610.3923 | 638.3872 | LAKPIDG | 667.4137 | 695.4087 |
| AK      | 172.1444 | 200.1394 | AKP     | 269.1972 | 297.1921 | AKPI    | 382.2813 | 410.2762 |
| AKPID   | 497.3082 | 525.3031 | AKPIDG  | 554.3297 | 582.3246 | KP      | 198.1601 | 226.1550 |
| KPI     | 311.2442 | 339.2391 | KPID    | 426.2711 | 454.2660 | KPIDG   | 483.2926 | 511.2875 |
| KPIDGR  | 639.3937 | 667.3886 | KPIDGRG | 696.4151 | 724.4100 | PI      | 183.1492 | 211.1441 |
| PID     | 298.1761 | 326.1710 | PIDG    | 355.1976 | 383.1925 | PIDGR   | 511.2987 | 539.2936 |
| PIDGRG  | 568.3202 | 596.3151 | PIDGRGE | 697.3628 | 725.3577 | ID      | 201.1234 | 229.1183 |
| IDG     | 258.1448 | 286.1397 | IDGR    | 414.2459 | 442.2409 | IDGRG   | 471.2674 | 499.2623 |
| IDGRGE  | 600.3100 | 628.3049 | DG      | 145.0608 | 173.0557 | DGR     | 301.1619 | 329.1568 |
| DGRG    | 358.1833 | 386.1783 | DGRGE   | 487.2259 | 515.2209 | DGRGEI  | 600.3100 | 628.3049 |
| DGRGEIV | 699.3784 | 727.3733 | GR      | 186.1349 | 214.1299 | GRG     | 243.1564 | 271.1513 |
| GRGE    | 372.1990 | 400.1939 | GRGEI   | 485.2831 | 513.2780 | GRGEIV  | 584.3515 | 612.3464 |
| GRGEIVA | 655.3886 | 683.3835 | RG      | 186.1349 | 214.1299 | RGE     | 315.1775 | 343.1724 |
| RGEI    | 428.2616 | 456.2565 | RGEIV   | 527.3300 | 555.3249 | RGEIVA  | 598.3671 | 626.3620 |
| RGEIVAS | 685.3991 | 713.3941 | GE      | 159.0764 | 187.0713 | GEI     | 272.1605 | 300.1554 |
| GEIV    | 371.2289 | 399.2238 | GEIVA   | 442.2660 | 470.2609 | GEIVAS  | 529.2980 | 557.2930 |
| GEIVASE | 658.3406 | 686.3355 | EI      | 215.1390 | 243.1339 | EIV     | 314.2074 | 342.2023 |
| EIVA    | 385.2445 | 413.2395 | EIVAS   | 472.2766 | 500.2715 | EIVASE  | 601.3192 | 629.3141 |
| EIVASES | 688.3512 | 716.3461 | IV      | 185.1648 | 213.1598 | IVA     | 256.2020 | 284.1969 |
| IVAS    | 343.2340 | 371.2289 | IVASE   | 472.2766 | 500.2715 | IVASES  | 559.3086 | 587.3035 |
| VA      | 143.1179 | 171.1128 | VAS     | 230.1499 | 258.1448 | VASE    | 359.1925 | 387.1874 |
| VASES   | 446.2245 | 474.2195 | AS      | 131.0815 | 159.0764 | ASE     | 260.1241 | 288.1190 |
| ASES    | 347.1561 | 375.1510 | SE      | 189.0870 | 217.0819 | SES     | 276.1190 | 304.1139 |
| ES      | 189.0870 | 217.0819 |         |          |          |         |          |          |

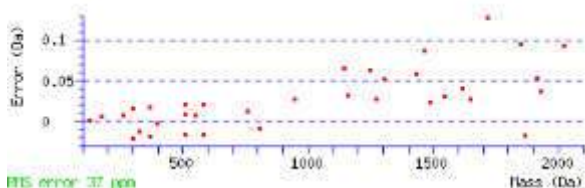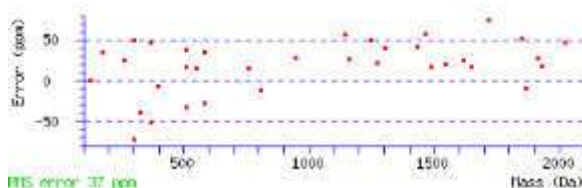

NCBI BLAST search of [VINALAKPIDGRGEIVASESR](#)  
 (Parameters: blastp, nr protein database, expect=20000, no filter, PAM30)  
 Other BLAST [web gateways](#)

All matches to this query

| Score | Mr(calcd) | Delta   | Sequence                                 |
|-------|-----------|---------|------------------------------------------|
| 97.9  | 2194.2069 | 0.1210  | <a href="#">VINALAKPIDGRGEIVASESR</a>    |
| 16.6  | 2194.0807 | 0.2472  | <a href="#">SFADRAVLSLQSNPGWGFDK</a>     |
| 14.9  | 2194.0993 | 0.2286  | <a href="#">TWMNWPNIPTPALQLPGSR</a>      |
| 12.7  | 2194.2223 | 0.1056  | <a href="#">LSRGTVEVVPSGHPVVVTSSR</a>    |
| 11.9  | 2194.1706 | 0.1574  | <a href="#">VINALGKPIDGRGEIPSSSR</a>     |
| 11.8  | 2194.0484 | 0.2796  | <a href="#">LFHAIFVVOGDEHASSDFK</a>      |
| 11.6  | 2194.2011 | 0.1269  | <a href="#">LHINGIAOGLLYLHNYSR</a>       |
| 10.2  | 2194.0350 | 0.2930  | <a href="#">YGAGLTNLGSDGDASNGTSSLSSK</a> |
| 10.2  | 2194.1899 | 0.1381  | <a href="#">RYVYLLPVLALDPSAHPDR</a>      |
| 9.0   | 2194.9491 | -0.6211 | <a href="#">AFDAMQAWDGVGGGHATYDAR</a>    |

Mascot: <http://www.matrixscience.com/>

**MATRIX SCIENCE Mascot Search Results**

**Peptide View Spot no 97**

MS/MS Fragmentation of **SVYEPLQTGLIAIDSMIPIGR**

Found in **gi|11466784** in **NCBIInr**, ATP synthase CF1 alpha subunit [Oryza sativa Japonica Group]

Match to Query 90: 2272.342124 from(2273.349400,1+) intensity(0.0000) index(25)

Title: Label: I11, Spot\_Id: 216645, Peak\_List\_Id: 221394, MSMS Job\_Run\_Id: 21364, Comment:

Data file C:\Documents and Settings\Administrator\Desktop\farah BHU\Akansha BHU\RAJESH\12-1-13 raj\ppw\_I11\_136074508400.txt

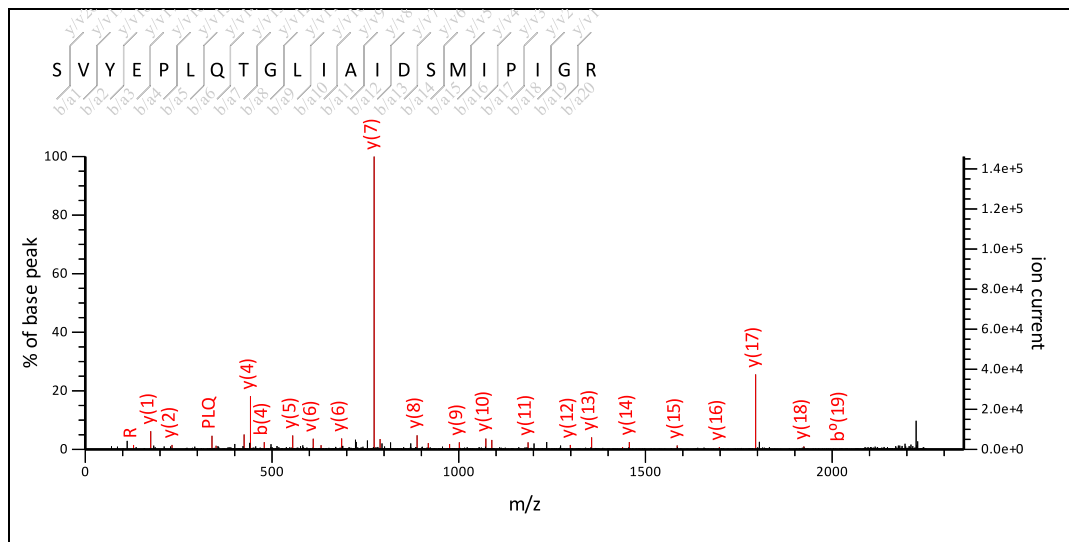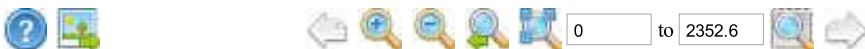

Label all possible matches  Label matches used for scoring

Monoisotopic mass of neutral peptide Mr(calc): 2272.2137

Fixed modifications: Carbamidomethyl (C) (apply to specified residues or termini only)

Ions Score: 144 Expect: 1e-11

Matches : 37/409 fragment ions using 44 most intense peaks [\(help\)](#)

| #  | Immon.          | a               | a*        | a <sup>0</sup> | b                | b*        | b <sup>0</sup>   | d         | d'        | Seq. | v               | w         | w'        | y                | y*              |
|----|-----------------|-----------------|-----------|----------------|------------------|-----------|------------------|-----------|-----------|------|-----------------|-----------|-----------|------------------|-----------------|
| 1  | 60.0444         | 60.0444         |           | 42.0338        | 88.0393          |           | 70.0287          | 44.0495   |           | S    |                 |           |           |                  |                 |
| 2  | 72.0808         | 159.1128        |           | 141.1022       | 187.1077         |           | 169.0972         | 145.0972  |           | V    | 2142.1264       | 2155.1468 |           | 2186.1890        | 2169.1624       |
| 3  | 136.0757        | 322.1761        |           | 304.1656       | <b>350.1710</b>  |           | 332.1605         |           |           | Y    | 1979.0630       |           |           | 2087.1205        | 2070.0940       |
| 4  | 102.0550        | 451.2187        |           | 433.2082       | <b>479.2136</b>  |           | 461.2031         | 393.2132  |           | E    | 1850.0204       | 1849.0252 |           | <b>1924.0572</b> | 1907.0307       |
| 5  | 70.0651         | 548.2715        |           | 530.2609       | 576.2664         |           | 558.2558         | 522.2558  |           | P    | 1752.9677       | 1751.9724 |           | <b>1795.0146</b> | 1777.9881       |
| 6  | 86.0964         | 661.3556        |           | 643.3450       | 689.3505         |           | 671.3399         | 619.3086  |           | L    | 1639.8836       | 1638.8884 |           | <b>1697.9619</b> | 1680.9353       |
| 7  | 101.0709        | <b>789.4141</b> | 772.3876  | 771.4036       | 817.4090         | 800.3825  | 799.3985         | 732.3927  |           | Q    | 1511.8250       | 1510.8298 |           | <b>1584.8778</b> | 1567.8512       |
| 8  | 74.0600         | 890.4618        | 873.4353  | 872.4512       | <b>918.4567</b>  | 901.4302  | 900.4462         | 874.4669  | 876.4462  | T    | 1410.7773       | 1423.7977 | 1425.7770 | <b>1456.8192</b> | 1439.7927       |
| 9  | 30.0338         | 947.4833        | 930.4567  | 929.4727       | <b>975.4782</b>  | 958.4516  | 957.4676         |           |           | G    |                 |           |           | <b>1355.7715</b> | 1338.7450       |
| 10 | 86.0964         | 1060.5673       | 1043.5408 | 1042.5568      | <b>1088.5623</b> | 1071.5357 | 1070.5517        | 1018.5204 |           | L    | 1240.6718       | 1239.6766 |           | <b>1298.7501</b> | 1281.7235       |
| 11 | 86.0964         | 1173.6514       | 1156.6249 | 1155.6408      | 1201.6463        | 1184.6198 | 1183.6358        | 1145.6201 | 1159.6358 | I    | 1127.5878       | 1140.6082 | 1154.6238 | <b>1185.6660</b> | 1168.6395       |
| 12 | 44.0495         | 1244.6885       | 1227.6620 | 1226.6780      | 1272.6834        | 1255.6569 | 1254.6729        |           |           | A    | 1056.5506       |           |           | <b>1072.5819</b> | 1055.5554       |
| 13 | 86.0964         | 1357.7726       | 1340.7460 | 1339.7620      | 1385.7675        | 1368.7409 | 1367.7569        | 1329.7413 | 1343.7569 | I    | 943.4666        | 956.4870  | 970.5026  | <b>1001.5448</b> | 984.5183        |
| 14 | 88.0393         | 1472.7995       | 1455.7730 | 1454.7890      | 1500.7944        | 1483.7679 | <b>1482.7839</b> | 1428.8097 |           | D    | 828.4396        | 827.4444  |           | <b>888.4608</b>  | 871.4342        |
| 15 | 60.0444         | 1559.8316       | 1542.8050 | 1541.8210      | 1587.8265        | 1570.7999 | 1569.8159        | 1543.8366 |           | S    | 741.4076        | 740.4124  |           | <b>773.4338</b>  | 756.4073        |
| 16 | 104.0528        | 1690.8720       | 1673.8455 | 1672.8615      | 1718.8670        | 1701.8404 | 1700.8564        | 1630.8687 |           | M    | <b>610.3671</b> | 609.3719  |           | <b>686.4018</b>  | 669.3752        |
| 17 | 86.0964         | 1803.9561       | 1786.9296 | 1785.9455      | 1831.9510        | 1814.9245 | 1813.9404        | 1775.9248 | 1789.9405 | I    | 497.2831        | 510.3035  | 524.3191  | <b>555.3613</b>  | 538.3348        |
| 18 | 70.0651         | 1901.0089       | 1883.9823 | 1882.9983      | 1929.0038        | 1911.9772 | 1910.9932        | 1874.9932 |           | P    | 400.2303        | 399.2350  |           | <b>442.2772</b>  | <b>425.2507</b> |
| 19 | 86.0964         | 2014.0929       | 1997.0664 | 1996.0824      | 2042.0878        | 2025.0613 | <b>2024.0773</b> | 1986.0616 | 2000.0773 | I    | 287.1462        | 300.1666  | 314.1823  | 345.2245         | 328.1979        |
| 20 | 30.0338         | 2071.1144       | 2054.0878 | 2053.1038      | 2099.1093        | 2082.0828 | 2081.0987        |           |           | G    |                 |           |           | <b>232.1404</b>  | 215.1139        |
| 21 | <b>129.1135</b> |                 |           |                |                  |           |                  |           |           | R    | 74.0237         | 73.0284   |           | <b>175.1190</b>  | 158.0924        |

| Seq | ya | yb | Seq | ya | yb | Seq | ya | yb |
|-----|----|----|-----|----|----|-----|----|----|
|     |    |    |     |    |    |     |    |    |



|         |          |          |        |          |          |         |          |          |
|---------|----------|----------|--------|----------|----------|---------|----------|----------|
| VY      | 235.1441 | 263.1390 | VYE    | 364.1867 | 392.1816 | VYEP    | 461.2395 | 489.2344 |
| VYEPL   | 574.3235 | 602.3184 | YE     | 265.1183 | 293.1132 | YEP     | 362.1710 | 390.1660 |
| YEPL    | 475.2551 | 503.2500 | YEPLQ  | 603.3137 | 631.3086 | EP      | 199.1077 | 227.1026 |
| EPL     | 312.1918 | 340.1867 | EPLQ   | 440.2504 | 468.2453 | EPLQT   | 541.2980 | 569.2930 |
| EPLQTG  | 598.3195 | 626.3144 | PL     | 183.1492 | 211.1441 | PLQ     | 311.2078 | 339.2027 |
| PLQT    | 412.2554 | 440.2504 | PLQTG  | 469.2769 | 497.2718 | PLQTGL  | 582.3610 | 610.3559 |
| PLQTGLI | 695.4450 | 723.4400 | LQ     | 214.1550 | 242.1499 | LQT     | 315.2027 | 343.1976 |
| LQTG    | 372.2241 | 400.2191 | LQTGL  | 485.3082 | 513.3031 | LQTGLI  | 598.3923 | 626.3872 |
| LQTGLIA | 669.4294 | 697.4243 | QT     | 202.1186 | 230.1135 | QTG     | 259.1401 | 287.1350 |
| QTGL    | 372.2241 | 400.2191 | QTGLI  | 485.3082 | 513.3031 | QTGLIA  | 556.3453 | 584.3402 |
| QTGLIAI | 669.4294 | 697.4243 | TG     | 131.0815 | 159.0764 | TGL     | 244.1656 | 272.1605 |
| TGLI    | 357.2496 | 385.2445 | TGLIA  | 428.2867 | 456.2817 | TGLIAI  | 541.3708 | 569.3657 |
| TGLIAID | 656.3978 | 684.3927 | GL     | 143.1179 | 171.1128 | GLI     | 256.2020 | 284.1969 |
| GLIA    | 327.2391 | 355.2340 | GLIAI  | 440.3231 | 468.3180 | GLIAID  | 555.3501 | 583.3450 |
| GLIAIDS | 642.3821 | 670.3770 | LI     | 199.1805 | 227.1754 | LIA     | 270.2176 | 298.2125 |
| LIAI    | 383.3017 | 411.2966 | LIAD   | 498.3286 | 526.3235 | LIAIDS  | 585.3606 | 613.3556 |
| IA      | 157.1335 | 185.1285 | IAI    | 270.2176 | 298.2125 | IAID    | 385.2445 | 413.2395 |
| IAIDS   | 472.2766 | 500.2715 | IAIDSM | 603.3171 | 631.3120 | AI      | 157.1335 | 185.1285 |
| AID     | 272.1605 | 300.1554 | AIDS   | 359.1925 | 387.1874 | AIDSM   | 490.2330 | 518.2279 |
| AIDSMI  | 603.3171 | 631.3120 | ID     | 201.1234 | 229.1183 | IDS     | 288.1554 | 316.1503 |
| IDSM    | 419.1959 | 447.1908 | IDSMI  | 532.2799 | 560.2749 | IDSMIP  | 629.3327 | 657.3276 |
| DS      | 175.0713 | 203.0662 | DSM    | 306.1118 | 334.1067 | DSMI    | 419.1959 | 447.1908 |
| DSMIP   | 516.2486 | 544.2436 | DSMIPI | 629.3327 | 657.3276 | DSMIPIG | 686.3542 | 714.3491 |
| SM      | 191.0849 | 219.0798 | SMI    | 304.1689 | 332.1639 | SMIP    | 401.2217 | 429.2166 |
| SMIPI   | 514.3058 | 542.3007 | SMIPIG | 571.3272 | 599.3221 | MI      | 217.1369 | 245.1318 |
| MIP     | 314.1897 | 342.1846 | MIPI   | 427.2737 | 455.2687 | MIPIG   | 484.2952 | 512.2901 |
| IP      | 183.1492 | 211.1441 | IPI    | 296.2333 | 324.2282 | IPIG    | 353.2547 | 381.2496 |
| PI      | 183.1492 | 211.1441 | PIG    | 240.1707 | 268.1656 | IG      | 143.1179 | 171.1128 |

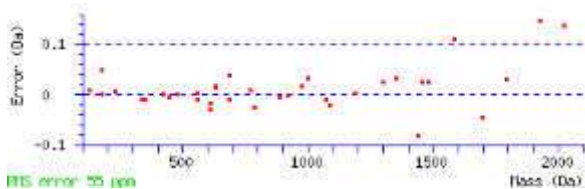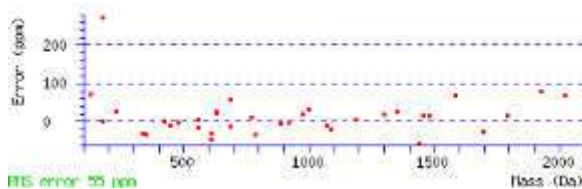

NCBI BLAST search of [SVYEPIQTGLIAIDSMIPIGR](#)  
 (Parameters: blastp, nr protein database, expect=20000, no filter, PAM30)  
 Other BLAST [web gateways](#)

All matches to this query

| Score | Mr(calcd) | Delta  | Sequence                              |
|-------|-----------|--------|---------------------------------------|
| 144.3 | 2272.2137 | 0.1284 | <a href="#">SVYEPIQTGLIAIDSMIPIGR</a> |
| 144.3 | 2272.2137 | 0.1284 | <a href="#">SVYEPIQTGLIAIDSMIPIGR</a> |
| 144.3 | 2272.2137 | 0.1284 | <a href="#">SVYEPIQTGLIAIDSMIPIGR</a> |
| 144.3 | 2272.2137 | 0.1284 | <a href="#">SVYEPIQTGLIAIDSMIPIGR</a> |
| 131.1 | 2272.2137 | 0.1284 | <a href="#">SVYEPIQTGLIAIDSMIPIGR</a> |
| 131.1 | 2272.2137 | 0.1284 | <a href="#">SVYEPIQTGLIAIDSMIPIGR</a> |
| 94.2  | 2272.2137 | 0.1284 | <a href="#">SVYEPIQTGLIAIDSMIPIGR</a> |
| 18.1  | 2272.1919 | 0.1502 | <a href="#">LMAKDLILSAIMSLAETHSGR</a> |
| 17.7  | 2272.2137 | 0.1284 | <a href="#">SVYEPIQTGLIAIDSMIPIGR</a> |
| 17.7  | 2272.1807 | 0.1614 | <a href="#">SVMEPIQTGLIAIDSMIPIGR</a> |

Mascot: <http://www.matrixscience.com/>



**MATRIX SCIENCE Mascot Search Results**

**Peptide View Spot no 97**

MS/MS Fragmentation of **SVYEPLQTGLIAIDSMIPIGR**

Found in **gi|11466784** in **NCBIInr**, ATP synthase CF1 alpha subunit [Oryza sativa Japonica Group]

Match to Query 92: 2288.339424 from(2289.346700,1+) intensity(0.0000) index(26)

Title: Label: I11, Spot\_Id: 216645, Peak\_List\_Id: 221407, MSMS Job\_Run\_Id: 21364, Comment:

Data file C:\Documents and Settings\Administrator\Desktop\farah BHU\Akansha BHU\RAJESH\12-1-13 raj\ppw\_I11\_136074508400.txt

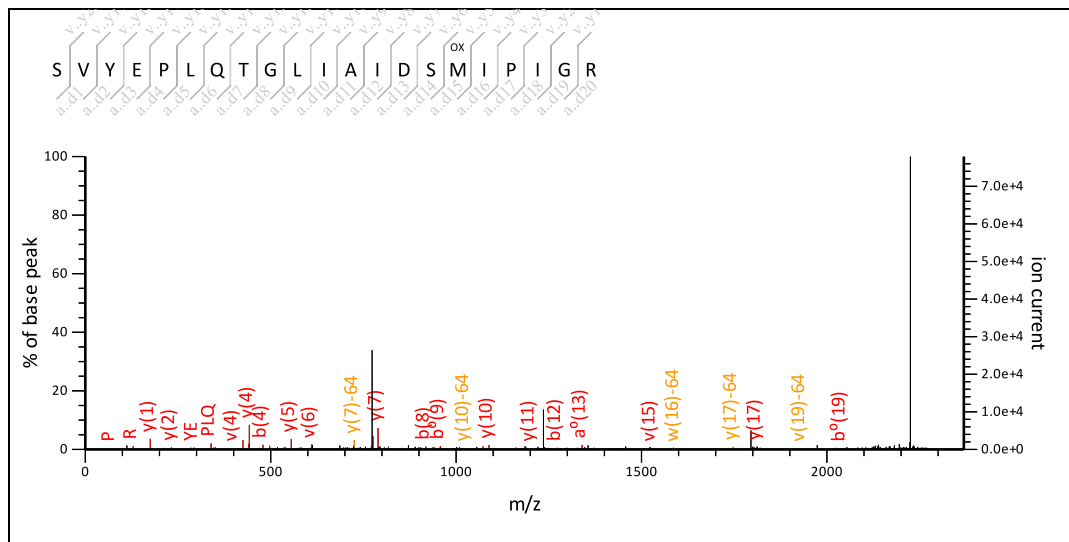

Navigation icons: Home, Back, Forward, Search, Print, etc. Range: 0 to 2369.31

Label all possible matches  Label matches used for scoring

Monoisotopic mass of neutral peptide Mr(calc): 2288.2086

Fixed modifications: Carbamidomethyl (C) (apply to specified residues or termini only)

Variable modifications:

M16 : Oxidation (M), with neutral losses 0.0000 (shown in table), 63.9983

Ions Score: 41 Expect: 0.19

Matches : 86/553 fragment ions using 143 most intense peaks [\(help\)](#)

| #  | Immon.   | a         | a*        | a <sup>0</sup> | b         | b*        | b <sup>0</sup> | d         | d'        | Seq. | v         | w         | w'        | y         | y*        |
|----|----------|-----------|-----------|----------------|-----------|-----------|----------------|-----------|-----------|------|-----------|-----------|-----------|-----------|-----------|
| 1  | 60.0444  | 60.0444   |           | 42.0338        | 88.0393   |           | 70.0287        | 44.0495   |           | S    |           |           |           |           |           |
| 2  | 72.0808  | 159.1128  |           | 141.1022       | 187.1077  |           | 169.0972       | 145.0972  |           | V    | 2158.1213 | 2171.1417 |           | 2202.1839 | 2185.1573 |
| 3  | 136.0757 | 322.1761  |           | 304.1656       | 350.1710  |           | 332.1605       |           |           | Y    | 1995.0579 |           |           | 2103.1155 | 2086.0889 |
| 4  | 102.0550 | 451.2187  |           | 433.2082       | 479.2136  |           | 461.2031       | 393.2132  |           | E    | 1866.0153 | 1865.0201 |           | 1940.0521 | 1923.0256 |
| 5  | 70.0651  | 548.2715  |           | 530.2609       | 576.2664  |           | 558.2558       | 522.2558  |           | P    | 1768.9626 | 1767.9673 |           | 1811.0095 | 1793.9830 |
| 6  | 86.0964  | 661.3556  |           | 643.3450       | 689.3505  |           | 671.3399       | 619.3086  |           | L    | 1655.8785 | 1654.8833 |           | 1713.9568 | 1696.9302 |
| 7  | 101.0709 | 789.4141  | 772.3876  | 771.4036       | 817.4090  | 800.3825  | 799.3985       | 732.3927  |           | Q    | 1527.8199 | 1526.8247 |           | 1600.8727 | 1583.8462 |
| 8  | 74.0600  | 890.4618  | 873.4353  | 872.4512       | 918.4567  | 901.4302  | 900.4462       | 874.4669  | 876.4462  | T    | 1426.7723 | 1439.7927 | 1441.7719 | 1472.8141 | 1455.7876 |
| 9  | 30.0338  | 947.4833  | 930.4567  | 929.4727       | 975.4782  | 958.4516  | 957.4676       |           |           | G    |           |           |           | 1371.7664 | 1354.7399 |
| 10 | 86.0964  | 1060.5673 | 1043.5408 | 1042.5568      | 1088.5623 | 1071.5357 | 1070.5517      | 1018.5204 |           | L    | 1256.6667 | 1255.6715 |           | 1314.7450 | 1297.7184 |
| 11 | 86.0964  | 1173.6514 | 1156.6249 | 1155.6408      | 1201.6463 | 1184.6198 | 1183.6358      | 1145.6201 | 1159.6358 | I    | 1143.5827 | 1156.6031 | 1170.6187 | 1201.6609 | 1184.6344 |
| 12 | 44.0495  | 1244.6885 | 1227.6620 | 1226.6780      | 1272.6834 | 1255.6569 | 1254.6729      |           |           | A    | 1072.5456 |           |           | 1088.5769 | 1071.5503 |
| 13 | 86.0964  | 1357.7726 | 1340.7460 | 1339.7620      | 1385.7675 | 1368.7409 | 1367.7569      | 1329.7413 | 1343.7569 | I    | 959.4615  | 972.4819  | 986.4975  | 1017.5397 | 1000.5132 |
| 14 | 88.0393  | 1472.7995 | 1455.7730 | 1454.7890      | 1500.7944 | 1483.7679 | 1482.7839      | 1428.8097 |           | D    | 844.4345  | 843.4393  |           | 904.4557  | 887.4291  |
| 15 | 60.0444  | 1559.8316 | 1542.8050 | 1541.8210      | 1587.8265 | 1570.7999 | 1569.8159      | 1543.8366 |           | S    | 757.4025  | 756.4073  |           | 789.4287  | 772.4022  |
| 16 | 120.0478 | 1706.8670 | 1689.8404 | 1688.8564      | 1734.8619 | 1717.8353 | 1716.8513      | 1630.8687 |           | M    | 610.3671  | 609.3719  |           | 702.3967  | 685.3702  |
| 17 | 86.0964  | 1819.9510 | 1802.9245 | 1801.9404      | 1847.9459 | 1830.9194 | 1829.9354      | 1791.9197 | 1805.9354 | I    | 497.2831  | 510.3035  | 524.3191  | 555.3613  | 538.3348  |
| 18 | 70.0651  | 1917.0038 | 1899.9772 | 1898.9932      | 1944.9987 | 1927.9721 | 1926.9881      | 1890.9881 |           | P    | 400.2303  | 399.2350  |           | 442.2772  | 425.2507  |
| 19 | 86.0964  | 2030.0878 | 2013.0613 | 2012.0773      | 2058.0828 | 2041.0562 | 2040.0722      | 2002.0565 | 2016.0722 | I    | 287.1462  | 300.1666  | 314.1823  | 345.2245  | 328.1979  |
| 20 | 30.0338  | 2087.1093 | 2070.0828 | 2069.0987      | 2115.1042 | 2098.0777 | 2097.0937      |           |           | G    |           |           |           | 232.1404  | 215.1139  |

|    |          |  |  |  |  |  |   |         |         |          |          |
|----|----------|--|--|--|--|--|---|---------|---------|----------|----------|
| 21 | 129.1135 |  |  |  |  |  | R | 74.0237 | 73.0284 | 175.1190 | 158.0924 |
|----|----------|--|--|--|--|--|---|---------|---------|----------|----------|

| Seq     | ya       | yb       | Seq    | ya       | yb       | Seq    | ya       | yb       |
|---------|----------|----------|--------|----------|----------|--------|----------|----------|
| VY      | 235.1441 | 263.1390 | VYE    | 364.1867 | 392.1816 | VYEP   | 461.2395 | 489.2344 |
| VYEPL   | 574.3235 | 602.3184 | YE     | 265.1183 | 293.1132 | YEP    | 362.1710 | 390.1660 |
| YEPL    | 475.2551 | 503.2500 | YEPLQ  | 603.3137 | 631.3086 | EP     | 199.1077 | 227.1026 |
| EPL     | 312.1918 | 340.1867 | EPLQ   | 440.2504 | 468.2453 | EPLQT  | 541.2980 | 569.2930 |
| EPLQTG  | 598.3195 | 626.3144 | PL     | 183.1492 | 211.1441 | PLQ    | 311.2078 | 339.2027 |
| PLQT    | 412.2554 | 440.2504 | PLQTG  | 469.2769 | 497.2718 | PLQTGL | 582.3610 | 610.3559 |
| PLQTGLI | 695.4450 | 723.4400 | LQ     | 214.1550 | 242.1499 | LQT    | 315.2027 | 343.1976 |
| LQTG    | 372.2241 | 400.2191 | LQTGL  | 485.3082 | 513.3031 | LQTGLI | 598.3923 | 626.3872 |
| LQTGLIA | 669.4294 | 697.4243 | QT     | 202.1186 | 230.1135 | QTG    | 259.1401 | 287.1350 |
| QTGL    | 372.2241 | 400.2191 | QTGLI  | 485.3082 | 513.3031 | QTGLIA | 556.3453 | 584.3402 |
| QTGLIAI | 669.4294 | 697.4243 | TG     | 131.0815 | 159.0764 | TGL    | 244.1656 | 272.1605 |
| TGLI    | 357.2496 | 385.2445 | TGLIA  | 428.2867 | 456.2817 | TGLIAI | 541.3708 | 569.3657 |
| TGLIAID | 656.3978 | 684.3927 | GL     | 143.1179 | 171.1128 | GLI    | 256.2020 | 284.1969 |
| GLIA    | 327.2391 | 355.2340 | GLIAI  | 440.3231 | 468.3180 | GLIAID | 555.3501 | 583.3450 |
| GLIAIDS | 642.3821 | 670.3770 | LI     | 199.1805 | 227.1754 | LIA    | 270.2176 | 298.2125 |
| LIAI    | 383.3017 | 411.2966 | LIAID  | 498.3286 | 526.3235 | LIAIDS | 585.3606 | 613.3556 |
| IA      | 157.1335 | 185.1285 | IAI    | 270.2176 | 298.2125 | IAID   | 385.2445 | 413.2395 |
| IAIDS   | 472.2766 | 500.2715 | IAIDSM | 619.3120 | 647.3069 | AI     | 157.1335 | 185.1285 |
| AID     | 272.1605 | 300.1554 | AIDS   | 359.1925 | 387.1874 | AIDSM  | 506.2279 | 534.2228 |
| AIDSMI  | 619.3120 | 647.3069 | ID     | 201.1234 | 229.1183 | IDS    | 288.1554 | 316.1503 |
| IDSM    | 435.1908 | 463.1857 | IDSMI  | 548.2749 | 576.2698 | IDSMIP | 645.3276 | 673.3225 |
| DS      | 175.0713 | 203.0662 | DSM    | 322.1067 | 350.1016 | DSMI   | 435.1908 | 463.1857 |
| DSMIP   | 532.2436 | 560.2385 | DSMIPI | 645.3276 | 673.3225 | SM     | 207.0798 | 235.0747 |
| SMI     | 320.1639 | 348.1588 | SMIP   | 417.2166 | 445.2115 | SMIPI  | 530.3007 | 558.2956 |
| SMIPIG  | 587.3221 | 615.3171 | MI     | 233.1318 | 261.1267 | MIP    | 330.1846 | 358.1795 |
| MIPI    | 443.2687 | 471.2636 | MIPIG  | 500.2901 | 528.2850 | IP     | 183.1492 | 211.1441 |
| IPI     | 296.2333 | 324.2282 | IPIG   | 353.2547 | 381.2496 | PI     | 183.1492 | 211.1441 |
| PIG     | 240.1707 | 268.1656 | IG     | 143.1179 | 171.1128 |        |          |          |

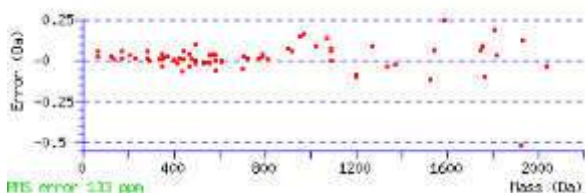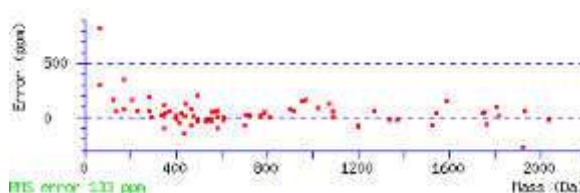

NCBI BLAST search of [SVYEPIQTGLIAIDSMIPIGR](#)  
 (Parameters: blastp, nr protein database, expect=20000, no filter, PAM30)  
 Other BLAST [web gateways](#)

All matches to this query

| Score | Mr(calc)  | Delta  | Sequence                              |
|-------|-----------|--------|---------------------------------------|
| 41.5  | 2288.2086 | 0.1308 | <a href="#">SVYEPIQTGLIAIDSMIPIGR</a> |
| 41.5  | 2288.2086 | 0.1308 | <a href="#">SVYEPIQTGLIAIDSMIPIGR</a> |
| 41.5  | 2288.2086 | 0.1308 | <a href="#">SVYEPIQTGLIAIDSMIPIGR</a> |
| 41.5  | 2288.2086 | 0.1308 | <a href="#">SVYEPIQTGLIAIDSMIPIGR</a> |
| 39.1  | 2288.2086 | 0.1308 | <a href="#">SVYEPIQTGLISIDAMIPIGR</a> |
| 13.6  | 2288.1206 | 0.2189 | <a href="#">ENDIELSTTPLSPSEKQCIK</a>  |
| 10.8  | 2287.3007 | 1.0387 | <a href="#">TMLSVLSSPALVSGLMVVRAK</a> |
| 8.7   | 2288.1042 | 0.2352 | <a href="#">RGVEPDVVYTYTALMDGHCLR</a> |
| 7.7   | 2288.1273 | 0.2121 | <a href="#">SADAVLVFMHQHPATHWGR</a>   |
| 7.7   | 2288.1518 | 0.1876 | <a href="#">LGFGLDTHVCTSLVLANCRR</a>  |

Mascot: <http://www.matrixscience.com/>

**MATRIX SCIENCE Mascot Search Results**

**Peptide View Spot no 97**

MS/MS Fragmentation of **QSQANPLPVEEQIATIIYIGTR**

Found in **gi|11466784** in **NCBIInr**, ATP synthase CF1 alpha subunit [Oryza sativa Japonica Group]

Match to Query 97: 2327.341824 from(2328.349100,1+) intensity(0.0000) index(28)

Title: Label: I11, Spot\_Id: 216645, Peak\_List\_Id: 221391, MSMS Job\_Run\_Id: 21364, Comment:

Data file C:\Documents and Settings\Administrator\Desktop\farah BHU\Akansha BHU\RAJESH\12-1-13 raj\ppw\_I11\_136074508400.txt

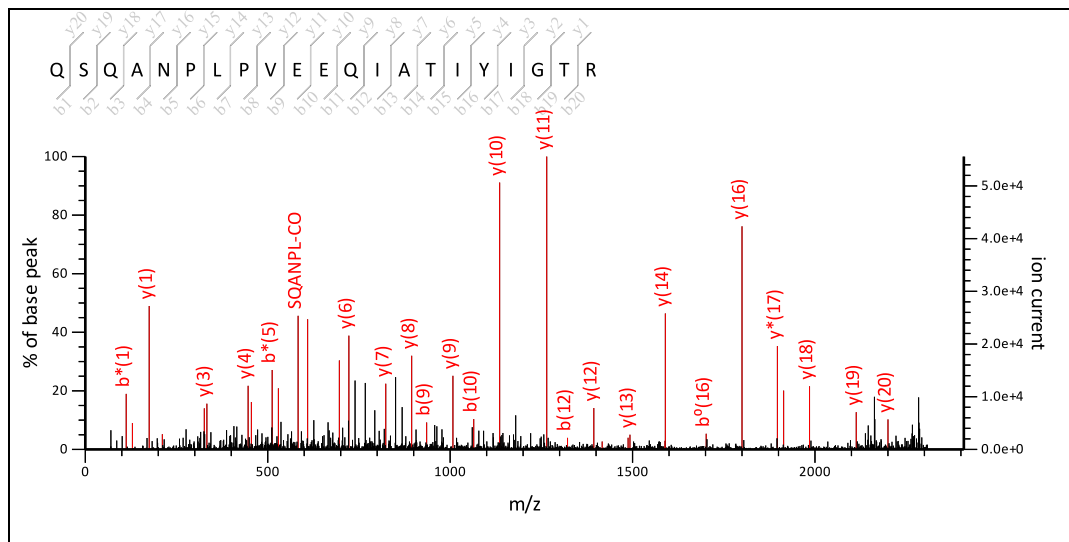

Navigation icons: Home, Back, Forward, Search, Print, Refresh. Range: 0 to 2408.04

Label all possible matches  Label matches used for scoring

Monoisotopic mass of neutral peptide Mr(calc): 2327.2121

Fixed modifications: Carbamidomethyl (C) (apply to specified residues or termini only)

Ions Score: 167 Expect: 5.1e-14

Matches : 43/423 fragment ions using 46 most intense peaks [\(help\)](#)

| #  | Immon.   | a         | a*        | a <sup>0</sup> | b         | b*        | b <sup>0</sup> | d         | d'        | Seq. | v         | w         | w'       | y         | y*        |
|----|----------|-----------|-----------|----------------|-----------|-----------|----------------|-----------|-----------|------|-----------|-----------|----------|-----------|-----------|
| 1  | 101.0709 | 101.0709  | 84.0444   |                | 129.0659  | 112.0393  |                | 44.0495   |           | Q    |           |           |          |           |           |
| 2  | 60.0444  | 188.1030  | 171.0764  | 170.0924       | 216.0979  | 199.0713  | 198.0873       | 172.1081  |           | S    | 2168.1346 | 2167.1394 |          | 2200.1608 | 2183.1343 |
| 3  | 101.0709 | 316.1615  | 299.1350  | 298.1510       | 344.1565  | 327.1299  | 326.1459       | 259.1401  |           | Q    | 2040.0760 | 2039.0808 |          | 2113.1288 | 2096.1022 |
| 4  | 44.0495  | 387.1987  | 370.1721  | 369.1881       | 415.1936  | 398.1670  | 397.1830       |           |           | A    | 1969.0389 |           |          | 1985.0702 | 1968.0437 |
| 5  | 87.0553  | 501.2416  | 484.2150  | 483.2310       | 529.2365  | 512.2100  | 511.2259       | 458.2358  |           | N    | 1854.9960 | 1854.0007 |          | 1914.0331 | 1897.0066 |
| 6  | 70.0651  | 598.2944  | 581.2678  | 580.2838       | 626.2893  | 609.2627  | 608.2787       | 572.2787  |           | P    | 1757.9432 | 1756.9480 |          | 1799.9902 | 1782.9636 |
| 7  | 86.0964  | 711.3784  | 694.3519  | 693.3678       | 739.3733  | 722.3468  | 721.3628       | 669.3315  |           | L    | 1644.8592 | 1643.8639 |          | 1702.9374 | 1685.9109 |
| 8  | 70.0651  | 808.4312  | 791.4046  | 790.4206       | 836.4261  | 819.3995  | 818.4155       | 782.4155  |           | P    | 1547.8064 | 1546.8112 |          | 1589.8534 | 1572.8268 |
| 9  | 72.0808  | 907.4996  | 890.4730  | 889.4890       | 935.4945  | 918.4680  | 917.4839       | 893.4839  |           | V    | 1448.7380 | 1461.7584 |          | 1492.8006 | 1475.7740 |
| 10 | 102.0550 | 1036.5422 | 1019.5156 | 1018.5316      | 1064.5371 | 1047.5106 | 1046.5265      | 978.5367  |           | E    | 1319.6954 | 1318.7001 |          | 1393.7322 | 1376.7056 |
| 11 | 102.0550 | 1165.5848 | 1148.5582 | 1147.5742      | 1193.5797 | 1176.5531 | 1175.5691      | 1107.5793 |           | E    | 1190.6528 | 1189.6576 |          | 1264.6896 | 1247.6630 |
| 12 | 101.0709 | 1293.6434 | 1276.6168 | 1275.6328      | 1321.6383 | 1304.6117 | 1303.6277      | 1236.6219 |           | Q    | 1062.5942 | 1061.5990 |          | 1135.6470 | 1118.6204 |
| 13 | 86.0964  | 1406.7274 | 1389.7009 | 1388.7169      | 1434.7223 | 1417.6958 | 1416.7118      | 1378.6961 | 1392.7118 | I    | 949.5102  | 962.5306  | 976.5462 | 1007.5884 | 990.5619  |
| 14 | 44.0495  | 1477.7645 | 1460.7380 | 1459.7540      | 1505.7594 | 1488.7329 | 1487.7489      |           |           | A    | 878.4730  |           |          | 894.5043  | 877.4778  |
| 15 | 74.0600  | 1578.8122 | 1561.7857 | 1560.8016      | 1606.8071 | 1589.7806 | 1588.7966      | 1562.8173 | 1564.7966 | T    | 777.4254  | 790.4458  | 792.4250 | 823.4672  | 806.4407  |
| 16 | 86.0964  | 1691.8963 | 1674.8697 | 1673.8857      | 1719.8912 | 1702.8646 | 1701.8806      | 1663.8650 | 1677.8806 | I    | 664.3413  | 677.3617  | 691.3774 | 722.4196  | 705.3930  |
| 17 | 136.0757 | 1854.9596 | 1837.9331 | 1836.9490      | 1882.9545 | 1865.9280 | 1864.9440      |           |           | Y    | 501.2780  |           |          | 609.3355  | 592.3089  |
| 18 | 86.0964  | 1968.0437 | 1951.0171 | 1950.0331      | 1996.0386 | 1979.0120 | 1978.0280      | 1940.0124 | 1954.0280 | I    | 388.1939  | 401.2143  | 415.2300 | 446.2722  | 429.2456  |
| 19 | 30.0338  | 2025.0651 | 2008.0386 | 2007.0546      | 2053.0600 | 2036.0335 | 2035.0495      |           |           | G    |           |           |          | 333.1881  | 316.1615  |
| 20 | 74.0600  | 2126.1128 | 2109.0863 | 2108.1022      | 2154.1077 | 2137.0812 | 2136.0972      | 2110.1179 | 2112.0972 | T    | 230.1248  | 243.1452  | 245.1244 | 276.1666  | 259.1401  |
| 21 | 129.1135 |           |           |                |           |           |                |           |           | R    | 74.0237   | 73.0284   |          | 175.1190  | 158.0924  |

| Seq | ya | yb | Seq | ya | yb | Seq | ya | yb |
|-----|----|----|-----|----|----|-----|----|----|
|     |    |    |     |    |    |     |    |    |

|         |          |          |         |          |          |          |          |          |
|---------|----------|----------|---------|----------|----------|----------|----------|----------|
| SQ      | 188.1030 | 216.0979 | SQA     | 259.1401 | 287.1350 | SQAN     | 373.1830 | 401.1779 |
| SQANP   | 470.2358 | 498.2307 | SQANPL  | 583.3198 | 611.3148 | SQANPLP  | 680.3726 | 708.3675 |
| QA      | 172.1081 | 200.1030 | QAN     | 286.1510 | 314.1459 | QANP     | 383.2037 | 411.1987 |
| QANPL   | 496.2878 | 524.2827 | QANPLP  | 593.3406 | 621.3355 | QANPLPV  | 692.4090 | 720.4039 |
| AN      | 158.0924 | 186.0873 | ANP     | 255.1452 | 283.1401 | ANPL     | 368.2292 | 396.2241 |
| ANPLP   | 465.2820 | 493.2769 | ANPLPV  | 564.3504 | 592.3453 | ANPLPVE  | 693.3930 | 721.3879 |
| NP      | 184.1081 | 212.1030 | NPL     | 297.1921 | 325.1870 | NPLP     | 394.2449 | 422.2398 |
| NPLPV   | 493.3133 | 521.3082 | NPLPVE  | 622.3559 | 650.3508 | PL       | 183.1492 | 211.1441 |
| PLP     | 280.2020 | 308.1969 | PLPV    | 379.2704 | 407.2653 | PLPVE    | 508.3130 | 536.3079 |
| PLPVEE  | 637.3556 | 665.3505 | LP      | 183.1492 | 211.1441 | LPV      | 282.2176 | 310.2125 |
| LPVE    | 411.2602 | 439.2551 | LPVEE   | 540.3028 | 568.2977 | LPVEEQ   | 668.3614 | 696.3563 |
| PV      | 169.1335 | 197.1285 | PVE     | 298.1761 | 326.1710 | PVEE     | 427.2187 | 455.2136 |
| PVEEQ   | 555.2773 | 583.2722 | PVEEQI  | 668.3614 | 696.3563 | VE       | 201.1234 | 229.1183 |
| VEE     | 330.1660 | 358.1609 | VEEQ    | 458.2245 | 486.2195 | VEEQI    | 571.3086 | 599.3035 |
| VEEQIA  | 642.3457 | 670.3406 | EE      | 231.0975 | 259.0925 | EEQ      | 359.1561 | 387.1510 |
| EEQI    | 472.2402 | 500.2351 | EEQIA   | 543.2773 | 571.2722 | EEQIAT   | 644.3250 | 672.3199 |
| EQ      | 230.1135 | 258.1084 | EQI     | 343.1976 | 371.1925 | EQIA     | 414.2347 | 442.2296 |
| EQIAT   | 515.2824 | 543.2773 | EQIATI  | 628.3665 | 656.3614 | QI       | 214.1550 | 242.1499 |
| QIA     | 285.1921 | 313.1870 | QIAT    | 386.2398 | 414.2347 | QIATI    | 499.3239 | 527.3188 |
| QIATIIY | 662.3872 | 690.3821 | IA      | 157.1335 | 185.1285 | IAT      | 258.1812 | 286.1761 |
| IATI    | 371.2653 | 399.2602 | IATIIY  | 534.3286 | 562.3235 | IATIIYI  | 647.4127 | 675.4076 |
| AT      | 145.0972 | 173.0921 | ATI     | 258.1812 | 286.1761 | ATIIY    | 421.2445 | 449.2395 |
| ATIIYI  | 534.3286 | 562.3235 | ATIIYIG | 591.3501 | 619.3450 | ATIIYIGT | 692.3978 | 720.3927 |
| TI      | 187.1441 | 215.1390 | TIY     | 350.2074 | 378.2023 | TIYI     | 463.2915 | 491.2864 |
| TIYIG   | 520.3130 | 548.3079 | TIYIGT  | 621.3606 | 649.3556 | IY       | 249.1598 | 277.1547 |
| IYI     | 362.2438 | 390.2387 | IYIG    | 419.2653 | 447.2602 | IYIGT    | 520.3130 | 548.3079 |
| YI      | 249.1598 | 277.1547 | YIG     | 306.1812 | 334.1761 | YIGT     | 407.2289 | 435.2238 |
| IG      | 143.1179 | 171.1128 | IGT     | 244.1656 | 272.1605 | GT       | 131.0815 | 159.0764 |

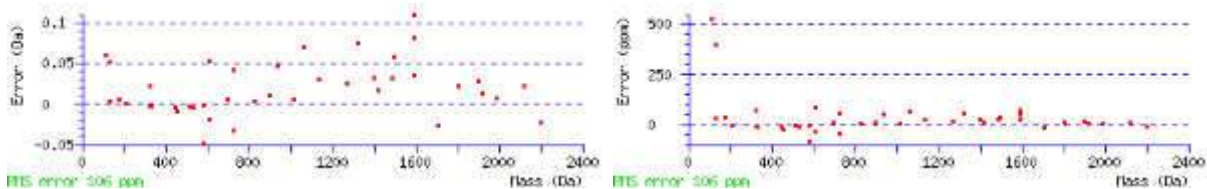

NCBI BLAST search of [QSQANPLPVEEQIATIIYIGTR](#)  
 (Parameters: blastp, nr protein database, expect=20000, no filter, PAM30)  
 Other BLAST [web gateways](#)

All matches to this query

| Score | Mr(calcd) | Delta   | Sequence                               |
|-------|-----------|---------|----------------------------------------|
| 167.3 | 2327.2121 | 0.1297  | <a href="#">QSQANPLPVEEQIATIIYIGTR</a> |
| 17.5  | 2326.2218 | 1.1201  | <a href="#">TGTMSLFPLLMAGIVSIAYWR</a>  |
| 17.2  | 2327.2155 | 0.1263  | <a href="#">MTTVSTLTALAGETALRSSFVR</a> |
| 16.4  | 2327.1427 | 0.1991  | <a href="#">TLENSHPDLKELDVSTNMLR</a>   |
| 13.7  | 2327.2824 | 0.0594  | <a href="#">QFMFGVKPTTLALHSITIPAR</a>  |
| 13.6  | 2326.1448 | 1.1970  | <a href="#">ROLNAALDVMNAATTGDGTHVR</a> |
| 12.8  | 2328.2226 | -0.8808 | <a href="#">AGNRIPGLSIVIDEATWDFVR</a>  |
| 11.1  | 2327.0899 | 0.2519  | <a href="#">MYAOEGGMRLVSHPIAAHDGR</a>  |
| 10.8  | 2326.1917 | 1.1501  | <a href="#">QEDLVYQSVSGPRTLHLASR</a>   |
| 9.4   | 2326.1917 | 1.1501  | <a href="#">QEDVILYQSVSGPRTLHLASR</a>  |

Mascot: <http://www.matrixscience.com/>

**MATRIX SCIENCE Mascot Search Results**

**Peptide View Spot no 97**

MS/MS Fragmentation of **TFTEAEILLKEAIQELER**

Found in **gi|11466784** in **NCBIInr**, ATP synthase CF1 alpha subunit [Oryza sativa Japonica Group]

Match to Query 99: 2389.375824 from(2390.383100,1+) intensity(0.0000) index(29)

Title: Label: I11, Spot\_Id: 216645, Peak\_List\_Id: 221397, MSMS Job\_Run\_Id: 21364, Comment:

Data file C:\Documents and Settings\Administrator\Desktop\farah BHU\Akansha BHU\RAJESH\12-1-13 raj\ppw\_I11\_136074508400.txt

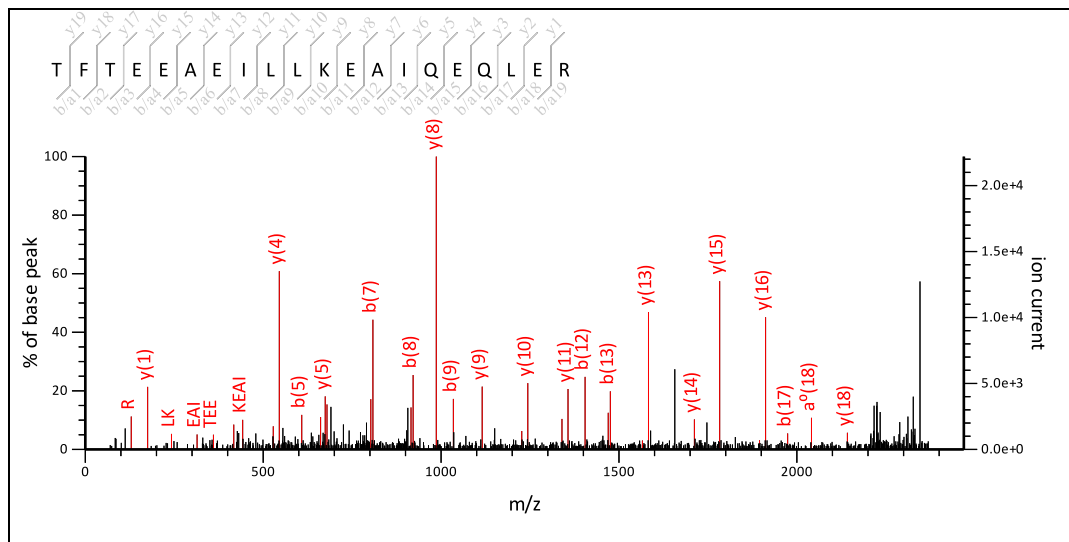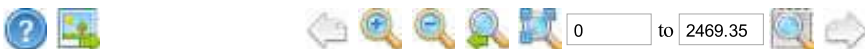

Label all possible matches  Label matches used for scoring

Monoisotopic mass of neutral peptide Mr(calc): 2389.2376

Fixed modifications: Carbamidomethyl (C) (apply to specified residues or termini only)

Ions Score: 152 Expect: 1.5e-12

Matches : 45/373 fragment ions using 46 most intense peaks (help)

| #  | Immon.          | a         | a*        | a <sup>0</sup>   | b                | b*        | b <sup>0</sup>  | d         | d'        | Seq. | v         | w         | w'        | y                | y*               |
|----|-----------------|-----------|-----------|------------------|------------------|-----------|-----------------|-----------|-----------|------|-----------|-----------|-----------|------------------|------------------|
| 1  | 74.0600         | 74.0600   |           | 56.0495          | 102.0550         |           | 84.0444         | 44.0495   |           | T    |           |           |           |                  |                  |
| 2  | 120.0808        | 221.1285  |           | 203.1179         | 249.1234         |           | 231.1128        |           |           | F    | 2197.1347 |           |           | 2289.1973        | 2272.1707        |
| 3  | 74.0600         | 322.1761  |           | 304.1656         | 350.1710         |           | 332.1605        | 306.1812  | 308.1605  | T    | 2096.0870 | 2109.1074 | 2111.0867 | <b>2142.1289</b> | 2125.1023        |
| 4  | 102.0550        | 451.2187  |           | 433.2082         | 479.2136         |           | 461.2031        | 393.2132  |           | E    | 1967.0444 | 1966.0491 |           | <b>2041.0812</b> | 2024.0546        |
| 5  | 102.0550        | 580.2613  |           | 562.2508         | <b>608.2562</b>  |           | 590.2457        | 522.2558  |           | E    | 1838.0018 | 1837.0066 |           | <b>1912.0386</b> | <b>1895.0120</b> |
| 6  | 44.0495         | 651.2984  |           | 633.2879         | <b>679.2933</b>  |           | <b>661.2828</b> |           |           | A    | 1766.9647 |           |           | <b>1782.9960</b> | 1765.9694        |
| 7  | 102.0550        | 780.3410  |           | 762.3305         | <b>808.3359</b>  |           | 790.3254        | 722.3355  |           | E    | 1637.9221 | 1636.9268 |           | <b>1711.9589</b> | 1694.9323        |
| 8  | 86.0964         | 893.4251  |           | 875.4145         | <b>921.4200</b>  |           | 903.4094        | 865.3938  | 879.4094  | I    | 1524.8380 | 1537.8584 | 1551.8741 | <b>1582.9163</b> | <b>1565.8897</b> |
| 9  | 86.0964         | 1006.5092 |           | 988.4986         | <b>1034.5041</b> |           | 1016.4935       | 964.4622  |           | L    | 1411.7540 | 1410.7587 |           | <b>1469.8322</b> | 1452.8057        |
| 10 | 86.0964         | 1119.5932 |           | 1101.5827        | 1147.5881        |           | 1129.5776       | 1077.5463 |           | L    | 1298.6699 | 1297.6747 |           | <b>1356.7482</b> | <b>1339.7216</b> |
| 11 | 101.1073        | 1247.6882 | 1230.6616 | 1229.6776        | 1275.6831        | 1258.6565 | 1257.6725       | 1190.6303 |           | K    | 1170.5749 | 1169.5797 |           | <b>1243.6641</b> | <b>1226.6375</b> |
| 12 | 102.0550        | 1376.7308 | 1359.7042 | 1358.7202        | <b>1404.7257</b> | 1387.6991 | 1386.7151       | 1318.7253 |           | E    | 1041.5324 | 1040.5371 |           | <b>1115.5691</b> | 1098.5426        |
| 13 | 44.0495         | 1447.7679 | 1430.7413 | 1429.7573        | <b>1475.7628</b> | 1458.7363 | 1457.7522       |           |           | A    | 970.4952  |           |           | <b>986.5265</b>  | 969.5000         |
| 14 | 86.0964         | 1560.8520 | 1543.8254 | 1542.8414        | 1588.8469        | 1571.8203 | 1570.8363       | 1532.8207 | 1546.8363 | I    | 857.4112  | 870.4316  | 884.4472  | <b>915.4894</b>  | 898.4629         |
| 15 | 101.0709        | 1688.9105 | 1671.8840 | 1670.9000        | 1716.9054        | 1699.8789 | 1698.8949       | 1631.8891 |           | Q    | 729.3526  | 728.3573  |           | <b>802.4054</b>  | 785.3788         |
| 16 | 102.0550        | 1817.9531 | 1800.9266 | 1799.9426        | 1845.9480        | 1828.9215 | 1827.9375       | 1759.9476 |           | E    | 600.3100  | 599.3148  |           | <b>674.3468</b>  | 657.3202         |
| 17 | 101.0709        | 1946.0117 | 1928.9852 | 1928.0011        | <b>1974.0066</b> | 1956.9801 | 1955.9961       | 1888.9902 |           | Q    | 472.2514  | 471.2562  |           | <b>545.3042</b>  | <b>528.2776</b>  |
| 18 | 86.0964         | 2059.0958 | 2042.0692 | <b>2041.0852</b> | 2087.0907        | 2070.0641 | 2069.0801       | 2017.0488 |           | L    | 359.1674  | 358.1721  |           | <b>417.2456</b>  | 400.2191         |
| 19 | 102.0550        | 2188.1384 | 2171.1118 | 2170.1278        | 2216.1333        | 2199.1067 | 2198.1227       | 2130.1329 |           | E    | 230.1248  | 229.1295  |           | 304.1615         | 287.1350         |
| 20 | <b>129.1135</b> |           |           |                  |                  |           |                 |           |           | R    | 74.0237   | 73.0284   |           | <b>175.1190</b>  | 158.0924         |

| Seq | ya       | yb       | Seq | ya       | yb       | Seq  | ya       | yb       |
|-----|----------|----------|-----|----------|----------|------|----------|----------|
| FT  | 221.1285 | 249.1234 | FTE | 350.1710 | 378.1660 | FTEE | 479.2136 | 507.2086 |



|               |                 |                 |               |                 |                 |               |          |                 |
|---------------|-----------------|-----------------|---------------|-----------------|-----------------|---------------|----------|-----------------|
| <b>FTEEA</b>  | 550.2508        | 578.2457        | <b>FTEEA</b>  | <b>679.2933</b> | 707.2883        | <b>TE</b>     | 203.1026 | 231.0975        |
| <b>TEE</b>    | 332.1452        | <b>360.1401</b> | <b>TEEA</b>   | 403.1823        | 431.1773        | <b>TEEA</b>   | 532.2249 | 560.2198        |
| <b>TEEA</b>   | 645.3090        | 673.3039        | <b>EE</b>     | 231.0975        | 259.0925        | <b>EEA</b>    | 302.1347 | 330.1296        |
| <b>EEAE</b>   | 431.1773        | 459.1722        | <b>EEAEI</b>  | 544.2613        | 572.2562        | <b>EEAEIL</b> | 657.3454 | 685.3403        |
| <b>EA</b>     | 173.0921        | 201.0870        | <b>EAE</b>    | 302.1347        | 330.1296        | <b>EAEI</b>   | 415.2187 | 443.2136        |
| <b>EAEIL</b>  | <b>528.3028</b> | 556.2977        | <b>EAEILL</b> | 641.3869        | 669.3818        | <b>AE</b>     | 173.0921 | 201.0870        |
| <b>AEI</b>    | 286.1761        | <b>314.1710</b> | <b>AEIL</b>   | 399.2602        | 427.2551        | <b>AEILL</b>  | 512.3443 | 540.3392        |
| <b>AEILLK</b> | 640.4392        | 668.4341        | <b>EI</b>     | 215.1390        | 243.1339        | <b>EIL</b>    | 328.2231 | 356.2180        |
| <b>EILL</b>   | 441.3071        | 469.3021        | <b>EILLK</b>  | 569.4021        | 597.3970        | <b>EILLKE</b> | 698.4447 | 726.4396        |
| <b>IL</b>     | 199.1805        | 227.1754        | <b>ILL</b>    | 312.2646        | 340.2595        | <b>ILLK</b>   | 440.3595 | 468.3544        |
| <b>ILLKE</b>  | 569.4021        | 597.3970        | <b>ILLKEA</b> | 640.4392        | 668.4341        | <b>LL</b>     | 199.1805 | 227.1754        |
| <b>LLK</b>    | 327.2755        | 355.2704        | <b>LLKE</b>   | 456.3180        | 484.3130        | <b>LLKEA</b>  | 527.3552 | 555.3501        |
| <b>LLKEA</b>  | 640.4392        | 668.4341        | <b>LK</b>     | 214.1914        | <b>242.1863</b> | <b>LKE</b>    | 343.2340 | 371.2289        |
| <b>LKEA</b>   | 414.2711        | <b>442.2660</b> | <b>LKEAI</b>  | 527.3552        | 555.3501        | <b>LKEAIQ</b> | 655.4137 | 683.4087        |
| <b>KE</b>     | 230.1499        | 258.1448        | <b>KEA</b>    | 301.1870        | 329.1819        | <b>KEAI</b>   | 414.2711 | <b>442.2660</b> |
| <b>KEAIQ</b>  | 542.3297        | 570.3246        | <b>KEAIQE</b> | 671.3723        | 699.3672        | <b>EA</b>     | 173.0921 | 201.0870        |
| <b>EAI</b>    | 286.1761        | <b>314.1710</b> | <b>EAIQ</b>   | 414.2347        | <b>442.2296</b> | <b>EAIQE</b>  | 543.2773 | 571.2722        |
| <b>EAIQE</b>  | 671.3359        | 699.3308        | <b>AI</b>     | 157.1335        | 185.1285        | <b>AIQ</b>    | 285.1921 | 313.1870        |
| <b>AIQE</b>   | 414.2347        | <b>442.2296</b> | <b>AIQE</b>   | 542.2933        | 570.2882        | <b>AIQEQL</b> | 655.3774 | 683.3723        |
| <b>IQ</b>     | 214.1550        | <b>242.1499</b> | <b>IQE</b>    | 343.1976        | 371.1925        | <b>IQEQL</b>  | 471.2562 | 499.2511        |
| <b>IQEQL</b>  | 584.3402        | 612.3352        | <b>QE</b>     | 230.1135        | 258.1084        | <b>QEQL</b>   | 358.1721 | 386.1670        |
| <b>QEQL</b>   | 471.2562        | 499.2511        | <b>QEQL</b>   | 600.2988        | 628.2937        | <b>EQ</b>     | 230.1135 | 258.1084        |
| <b>EQL</b>    | 343.1976        | 371.1925        | <b>EQLE</b>   | 472.2402        | 500.2351        | <b>QL</b>     | 214.1550 | <b>242.1499</b> |
| <b>QLE</b>    | 343.1976        | 371.1925        | <b>LE</b>     | 215.1390        | 243.1339        |               |          |                 |

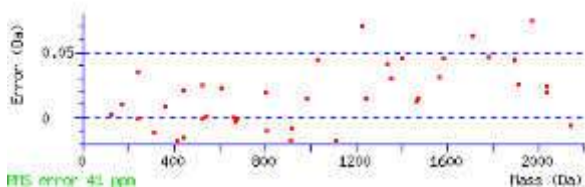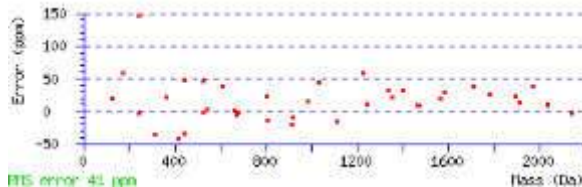

NCBI BLAST search of [TFTEEAELLKEAIOEQLER](#)  
 (Parameters: blastp, nr protein database, expect=20000, no filter, PAM30)  
 Other BLAST [web gateways](#)

All matches to this query

| Score | Mr(calc)  | Delta   | Sequence                               |
|-------|-----------|---------|----------------------------------------|
| 152.3 | 2389.2376 | 0.1382  | <a href="#">TFTEEAELLKEAIOEQIER</a>    |
| 152.3 | 2389.2376 | 0.1382  | <a href="#">TFTEEAELLKEAIOEQLER</a>    |
| 93.3  | 2388.2536 | 1.1222  | <a href="#">TFTEQAELLKEAIOEQLER</a>    |
| 59.0  | 2390.1965 | -0.8206 | <a href="#">TFTEEAENLLKEAIOEQIER</a>   |
| 22.2  | 2390.1675 | -0.7917 | <a href="#">ALCEKDSLPEAVALLDEFENK</a>  |
| 17.3  | 2389.1597 | 0.2161  | <a href="#">NLNHESIIRYCTSWIDVNR</a>    |
| 14.4  | 2390.0696 | -0.6938 | <a href="#">DNGTAEMVTDEGAIYFTKDAAR</a> |
| 13.7  | 2388.9621 | 0.4138  | <a href="#">GDDMYMETSDDLIRHMOER</a>    |
| 13.6  | 2390.2515 | -0.8757 | <a href="#">GFNPESGLLVLDKSLITMSR</a>   |
| 11.8  | 2390.2151 | -0.8393 | <a href="#">IVVSOAELLMEGNANPSTFNK</a>  |

Mascot: <http://www.matrixscience.com/>

**MATRIX SCIENCE Mascot Search Results**

**Peptide View Spot no 97**

MS/MS Fragmentation of **RSVYEPLQTLIAIDSMIPIGR**

Found in **gi|11466784** in **NCBI**nr, ATP synthase CF1 alpha subunit [Oryza sativa Japonica Group]

Match to Query 103: 2428.453424 from(2429.460700,1+) intensity(0.0000) index(31)

Title: Label: I11, Spot\_Id: 216645, Peak\_List\_Id: 221402, MSMS Job\_Run\_Id: 21364, Comment:

Data file C:\Documents and Settings\Administrator\Desktop\farah BHU\Akansha BHU\RAJESH\12-1-13 raj\ppw\_I11\_136074508400.txt

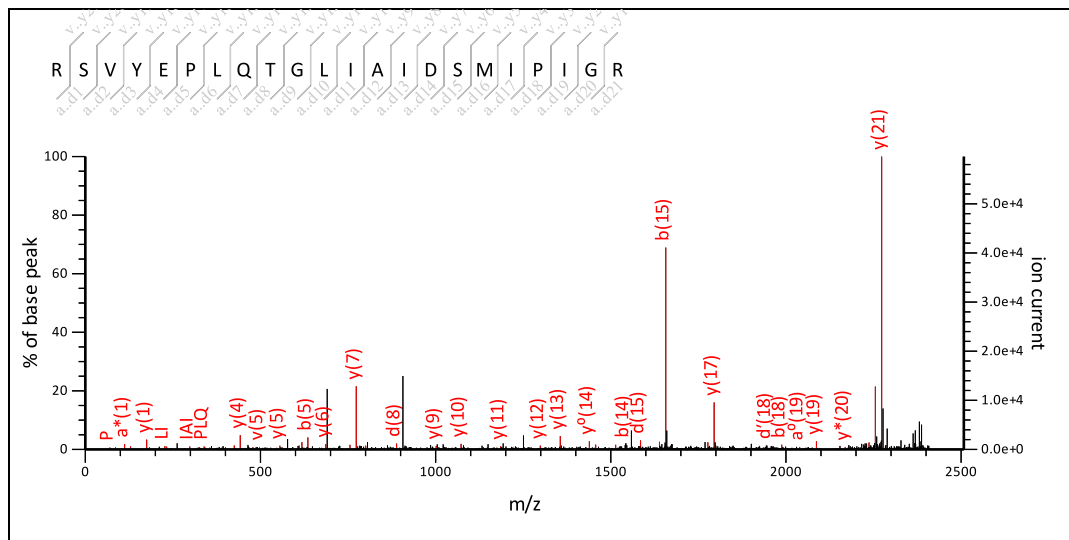

Navigation icons: Home, Back, Forward, Search, etc. Range: 0 to 2507.8

Label all possible matches  Label matches used for scoring

Monoisotopic mass of neutral peptide Mr(calc): 2428.3148

Fixed modifications: Carbamidomethyl (C) (apply to specified residues or termini only)

Ions Score: 100 Expect: 2.4e-07

Matches : 69/442 fragment ions using 96 most intense peaks [\(help\)](#)

| #  | Immon.   | a         | a*        | a <sup>0</sup> | b         | b*        | b <sup>0</sup> | d         | d'        | Seq. | v         | w         | w'        | y         | y*        |
|----|----------|-----------|-----------|----------------|-----------|-----------|----------------|-----------|-----------|------|-----------|-----------|-----------|-----------|-----------|
| 1  | 129.1135 | 129.1135  | 112.0869  |                | 157.1084  | 140.0818  |                | 44.0495   |           | R    |           |           |           |           |           |
| 2  | 60.0444  | 216.1455  | 199.1190  | 198.1349       | 244.1404  | 227.1139  | 226.1298       | 200.1506  |           | S    | 2241.1948 | 2240.1995 |           | 2273.2210 | 2256.1944 |
| 3  | 72.0808  | 315.2139  | 298.1874  | 297.2033       | 343.2088  | 326.1823  | 325.1983       | 301.1983  |           | V    | 2142.1264 | 2155.1468 |           | 2186.1890 | 2169.1624 |
| 4  | 136.0757 | 478.2772  | 461.2507  | 460.2667       | 506.2722  | 489.2456  | 488.2616       |           |           | Y    | 1979.0630 |           |           | 2087.1205 | 2070.0940 |
| 5  | 102.0550 | 607.3198  | 590.2933  | 589.3093       | 635.3148  | 618.2882  | 617.3042       | 549.3144  |           | E    | 1850.0204 | 1849.0252 |           | 1924.0572 | 1907.0307 |
| 6  | 70.0651  | 704.3726  | 687.3461  | 686.3620       | 732.3675  | 715.3410  | 714.3570       | 678.3570  |           | P    | 1752.9677 | 1751.9724 |           | 1795.0146 | 1777.9881 |
| 7  | 86.0964  | 817.4567  | 800.4301  | 799.4461       | 845.4516  | 828.4250  | 827.4410       | 775.4097  |           | L    | 1639.8836 | 1638.8884 |           | 1697.9619 | 1680.9353 |
| 8  | 101.0709 | 945.5152  | 928.4887  | 927.5047       | 973.5102  | 956.4836  | 955.4996       | 888.4938  |           | Q    | 1511.8250 | 1510.8298 |           | 1584.8778 | 1567.8512 |
| 9  | 74.0600  | 1046.5629 | 1029.5364 | 1028.5524      | 1074.5578 | 1057.5313 | 1056.5473      | 1030.5680 | 1032.5473 | T    | 1410.7773 | 1423.7977 | 1425.7770 | 1456.8192 | 1439.7927 |
| 10 | 30.0338  | 1103.5844 | 1086.5578 | 1085.5738      | 1131.5793 | 1114.5528 | 1113.5687      |           |           | G    |           |           |           | 1355.7715 | 1338.7450 |
| 11 | 86.0964  | 1216.6684 | 1199.6419 | 1198.6579      | 1244.6634 | 1227.6368 | 1226.6528      | 1174.6215 |           | L    | 1240.6718 | 1239.6766 |           | 1298.7501 | 1281.7235 |
| 12 | 86.0964  | 1329.7525 | 1312.7260 | 1311.7419      | 1357.7474 | 1340.7209 | 1339.7369      | 1301.7212 | 1315.7369 | I    | 1127.5878 | 1140.6082 | 1154.6238 | 1185.6660 | 1168.6395 |
| 13 | 44.0495  | 1400.7896 | 1383.7631 | 1382.7791      | 1428.7845 | 1411.7580 | 1410.7740      |           |           | A    | 1056.5506 |           |           | 1072.5819 | 1055.5554 |
| 14 | 86.0964  | 1513.8737 | 1496.8471 | 1495.8631      | 1541.8686 | 1524.8421 | 1523.8580      | 1485.8424 | 1499.8580 | I    | 943.4666  | 956.4870  | 970.5026  | 1001.5448 | 984.5183  |
| 15 | 88.0393  | 1628.9006 | 1611.8741 | 1610.8901      | 1656.8955 | 1639.8690 | 1638.8850      | 1584.9108 |           | D    | 828.4396  | 827.4444  |           | 888.4608  | 871.4342  |
| 16 | 60.0444  | 1715.9327 | 1698.9061 | 1697.9221      | 1743.9276 | 1726.9010 | 1725.9170      | 1699.9377 |           | S    | 741.4076  | 740.4124  |           | 773.4338  | 756.4073  |
| 17 | 104.0528 | 1846.9731 | 1829.9466 | 1828.9626      | 1874.9681 | 1857.9415 | 1856.9575      | 1786.9698 |           | M    | 610.3671  | 609.3719  |           | 686.4018  | 669.3752  |
| 18 | 86.0964  | 1960.0572 | 1943.0307 | 1942.0466      | 1988.0521 | 1971.0256 | 1970.0416      | 1932.0259 | 1946.0416 | I    | 497.2831  | 510.3035  | 524.3191  | 555.3613  | 538.3348  |
| 19 | 70.0651  | 2057.1100 | 2040.0834 | 2039.0994      | 2085.1049 | 2068.0783 | 2067.0943      | 2031.0943 |           | P    | 400.2303  | 399.2350  |           | 442.2772  | 425.2507  |
| 20 | 86.0964  | 2170.1940 | 2153.1675 | 2152.1835      | 2198.1890 | 2181.1624 | 2180.1784      | 2142.1627 | 2156.1784 | I    | 287.1462  | 300.1666  | 314.1823  | 345.2245  | 328.1979  |
| 21 | 30.0338  | 2227.2155 | 2210.1890 | 2209.2049      | 2255.2104 | 2238.1839 | 2237.1999      |           |           | G    |           |           |           | 232.1404  | 215.1139  |
| 22 | 129.1135 |           |           |                |           |           |                |           |           | R    | 74.0237   | 73.0284   |           | 175.1190  | 158.0924  |



| Seq    | ya       | yb       | Seq     | ya       | yb       | Seq     | ya       | yb       |
|--------|----------|----------|---------|----------|----------|---------|----------|----------|
| SV     | 159.1128 | 187.1077 | SVY     | 322.1761 | 350.1710 | SVYE    | 451.2187 | 479.2136 |
| SVYEP  | 548.2715 | 576.2664 | SVYEPL  | 661.3556 | 689.3505 | VY      | 235.1441 | 263.1390 |
| VYE    | 364.1867 | 392.1816 | VYEP    | 461.2395 | 489.2344 | VYEPL   | 574.3235 | 602.3184 |
| YE     | 265.1183 | 293.1132 | YEP     | 362.1710 | 390.1660 | YEPL    | 475.2551 | 503.2500 |
| YEPLQ  | 603.3137 | 631.3086 | EP      | 199.1077 | 227.1026 | EPL     | 312.1918 | 340.1867 |
| EPLQ   | 440.2504 | 468.2453 | EPLQT   | 541.2980 | 569.2930 | EPLQTG  | 598.3195 | 626.3144 |
| PL     | 183.1492 | 211.1441 | PLQ     | 311.2078 | 339.2027 | PLQT    | 412.2554 | 440.2504 |
| PLQTG  | 469.2769 | 497.2718 | PLQTGL  | 582.3610 | 610.3559 | PLQTGLI | 695.4450 | 723.4400 |
| LQ     | 214.1550 | 242.1499 | LQT     | 315.2027 | 343.1976 | LQTG    | 372.2241 | 400.2191 |
| LQTGL  | 485.3082 | 513.3031 | LQTGLI  | 598.3923 | 626.3872 | LQTGLIA | 669.4294 | 697.4243 |
| QT     | 202.1186 | 230.1135 | QTG     | 259.1401 | 287.1350 | QTGL    | 372.2241 | 400.2191 |
| QTGLI  | 485.3082 | 513.3031 | QTGLIA  | 556.3453 | 584.3402 | QTGLIAI | 669.4294 | 697.4243 |
| TG     | 131.0815 | 159.0764 | TGL     | 244.1656 | 272.1605 | TGLI    | 357.2496 | 385.2445 |
| TGLIA  | 428.2867 | 456.2817 | TGLIAI  | 541.3708 | 569.3657 | TGLIAID | 656.3978 | 684.3927 |
| GL     | 143.1179 | 171.1128 | GLI     | 256.2020 | 284.1969 | GLIA    | 327.2391 | 355.2340 |
| GLIAI  | 440.3231 | 468.3180 | GLIAID  | 555.3501 | 583.3450 | GLIAIDS | 642.3821 | 670.3770 |
| LI     | 199.1805 | 227.1754 | LIA     | 270.2176 | 298.2125 | LIAI    | 383.3017 | 411.2966 |
| LIAID  | 498.3286 | 526.3235 | LIAIDS  | 585.3606 | 613.3556 | IA      | 157.1335 | 185.1285 |
| IAI    | 270.2176 | 298.2125 | IAID    | 385.2445 | 413.2395 | IAIDS   | 472.2766 | 500.2715 |
| IAIDSM | 603.3171 | 631.3120 | AI      | 157.1335 | 185.1285 | AID     | 272.1605 | 300.1554 |
| AIDS   | 359.1925 | 387.1874 | AIDSM   | 490.2330 | 518.2279 | AIDSMI  | 603.3171 | 631.3120 |
| ID     | 201.1234 | 229.1183 | IDS     | 288.1554 | 316.1503 | IDSM    | 419.1959 | 447.1908 |
| IDSMI  | 532.2799 | 560.2749 | IDSMIP  | 629.3327 | 657.3276 | DS      | 175.0713 | 203.0662 |
| DSM    | 306.1118 | 334.1067 | DSMI    | 419.1959 | 447.1908 | DSMIP   | 516.2486 | 544.2436 |
| DSMIPI | 629.3327 | 657.3276 | DSMIPIG | 686.3542 | 714.3491 | SM      | 191.0849 | 219.0798 |
| SMI    | 304.1689 | 332.1639 | SMIP    | 401.2217 | 429.2166 | SMIPI   | 514.3058 | 542.3007 |
| SMIPIG | 571.3272 | 599.3221 | MI      | 217.1369 | 245.1318 | MIP     | 314.1897 | 342.1846 |
| MIPI   | 427.2737 | 455.2687 | MIPIG   | 484.2952 | 512.2901 | IP      | 183.1492 | 211.1441 |
| IPI    | 296.2333 | 324.2282 | IPIG    | 353.2547 | 381.2496 | PI      | 183.1492 | 211.1441 |
| PIG    | 240.1707 | 268.1656 | IG      | 143.1179 | 171.1128 |         |          |          |

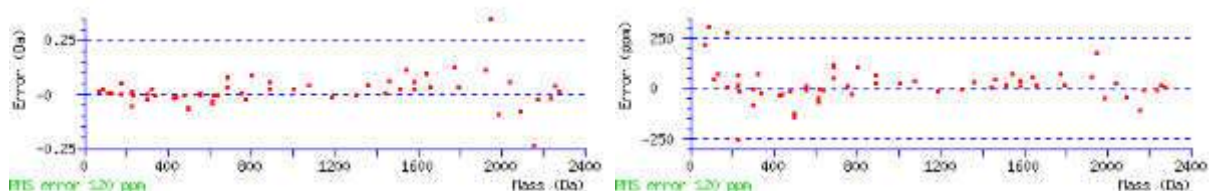

NCBI BLAST search of [RSVYEPIQTGLIAIDSMIPIGR](#)  
 (Parameters: blastp, nr protein database, expect=20000, no filter, PAM30)  
 Other BLAST [web gateways](#)

All matches to this query

| Score | Mr(calcd) | Delta   | Sequence                               |
|-------|-----------|---------|----------------------------------------|
| 100.4 | 2428.3148 | 0.1386  | <a href="#">RSVYEPIQTGLIAIDSMIPIGR</a> |
| 100.4 | 2428.3148 | 0.1386  | <a href="#">RSVYEPIQTGLIAIDSMIPIGR</a> |
| 100.4 | 2428.3148 | 0.1386  | <a href="#">RSVYEPIQTGLIAIDSMIPIGR</a> |
| 100.4 | 2428.3148 | 0.1386  | <a href="#">RSVYEPIQTGLIAIDSMIPIGR</a> |
| 88.6  | 2428.3148 | 0.1386  | <a href="#">RSVYEPIQTGLIAIDSMIPIGR</a> |
| 88.6  | 2428.3148 | 0.1386  | <a href="#">RSVYEPIQTGLIAIDSMIPIGR</a> |
| 65.3  | 2428.3148 | 0.1386  | <a href="#">RSVYEPIQTGLIAIDSMIPIGR</a> |
| 44.8  | 2428.1257 | 0.3278  | <a href="#">MTYYTPNYETKDTDILAAFR</a>   |
| 34.5  | 2429.1097 | -0.6563 | <a href="#">MTYYTPDYETKDTDILAAFR</a>   |
| 34.5  | 2429.1097 | -0.6563 | <a href="#">MTYYTPDYETKDTDILAAFR</a>   |

# MATRIX SCIENCE Mascot Search Results

## Peptide View **Spot no 101**

### MS/MS Fragmentation of **FLEYLDKDR**

Found in **gi|75114857** in **NCBI**nr, RecName: Full=ATP-dependent zinc metalloprotease FTSH 2, chloroplastic; Short=OsFTSH2; Flags: Precursor

Match to Query 16: 1197.624024 from(1198.631300,1+) intensity(0.0000) index(6)

Title: Label: H1, Spot\_Id: 219681, Peak\_List\_Id: 224997, MSMS Job\_Run\_Id: 21760, Comment:

Data file C:\Documents and Settings\Administrator\Desktop\farah BHU\spot set plate\Farah-Garima 11May 2013\ppw\_H1\_136842035700.txt

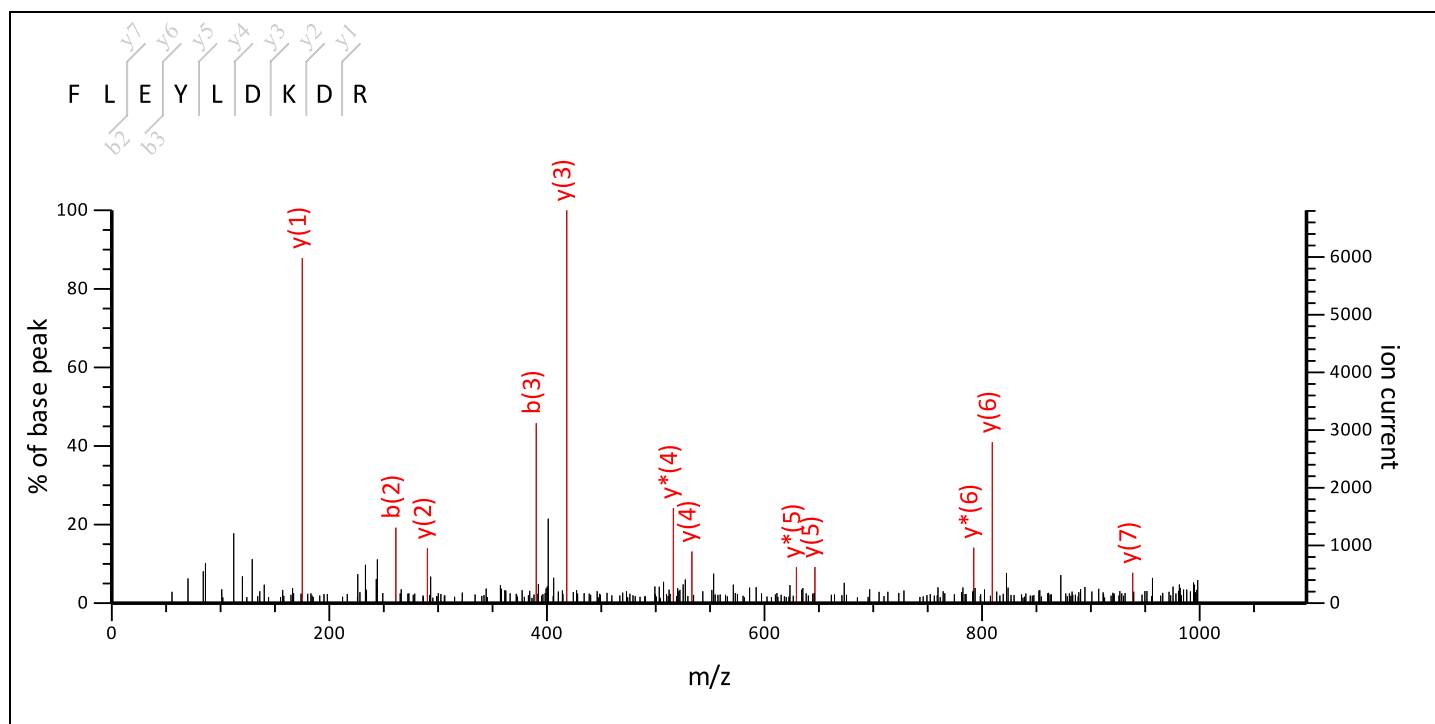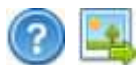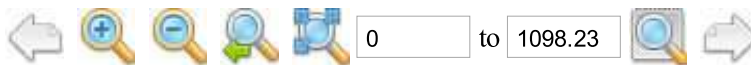

Label all possible matches  Label matches used for scoring

**Monoisotopic mass of neutral peptide Mr(calc):** 1197.6030

**Fixed modifications:** Carbamidomethyl (C) (apply to specified residues or termini only)

**Ions Score:** 50 **Expect:** 0.022

**Matches :** 12/36 fragment ions using 20 most intense peaks ([help](#))

| # | a        | a*       | b               | b*       | Seq. | y               | y*              | # |
|---|----------|----------|-----------------|----------|------|-----------------|-----------------|---|
| 1 | 120.0808 |          | 148.0757        |          | F    |                 |                 | 9 |
| 2 | 233.1648 |          | <b>261.1598</b> |          | L    | 1051.5419       | 1034.5153       | 8 |
| 3 | 362.2074 |          | <b>390.2023</b> |          | E    | <b>938.4578</b> | 921.4312        | 7 |
| 4 | 525.2708 |          | 553.2657        |          | Y    | <b>809.4152</b> | <b>792.3886</b> | 6 |
| 5 | 638.3548 |          | 666.3497        |          | L    | <b>646.3519</b> | <b>629.3253</b> | 5 |
| 6 | 753.3818 |          | 781.3767        |          | D    | <b>533.2678</b> | <b>516.2413</b> | 4 |
| 7 | 881.4767 | 864.4502 | 909.4716        | 892.4451 | K    | <b>418.2409</b> | 401.2143        | 3 |

|   |          |          |           |           |   |                 |          |   |
|---|----------|----------|-----------|-----------|---|-----------------|----------|---|
| 8 | 996.5037 | 979.4771 | 1024.4986 | 1007.4720 | D | <b>290.1459</b> | 273.1193 | 2 |
| 9 |          |          |           |           | R | <b>175.1190</b> | 158.0924 | 1 |

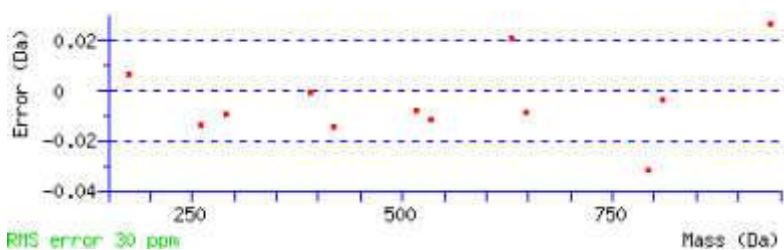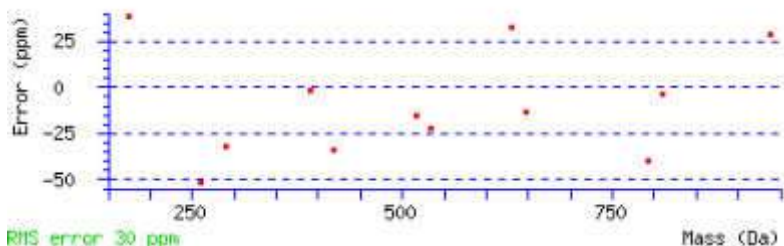

NCBI **BLAST** search of [FLEYLDKDR](#)

(Parameters: blastp, nr protein database, expect=20000, no filter, PAM30)

Other BLAST [web gateways](#)

#### All matches to this query

| Score | Mr(calc)  | Delta  | Sequence                   |
|-------|-----------|--------|----------------------------|
| 50.1  | 1197.6030 | 0.0211 | <a href="#">FLEYLDKDR</a>  |
| 22.8  | 1197.6030 | 0.0211 | <a href="#">LFELYKDDR</a>  |
| 22.0  | 1197.5302 | 0.0938 | <a href="#">IFEDFEAGDR</a> |
| 22.0  | 1197.5302 | 0.0938 | <a href="#">LFEDFEAGDR</a> |
| 20.2  | 1197.6030 | 0.0211 | <a href="#">LEFIYDAATR</a> |
| 18.2  | 1197.5818 | 0.0422 | <a href="#">LFEYGGYPPR</a> |
| 18.2  | 1197.5448 | 0.0792 | <a href="#">MEEYSRDLR</a>  |
| 17.6  | 1197.5812 | 0.0428 | <a href="#">MLASNLYTNR</a> |
| 13.6  | 1197.5886 | 0.0354 | <a href="#">MLEIYVCVR</a>  |
| 13.5  | 1197.6104 | 0.0137 | <a href="#">MIEYLVTWK</a>  |

Mascot: <http://www.matrixscience.com/>

# MATRIX SCIENCE Mascot Search Results

## Peptide View **Spot no 101**

### MS/MS Fragmentation of **LSDEAYEIALSQIR**

Found in **gi|75114857** in **NCBI nr**, RecName: Full=ATP-dependent zinc metalloprotease FTSH 2, chloroplastic; Short=OsFTSH2;  
Flags: Precursor

Match to Query 20: 1606.863224 from(1607.870500,1+) intensity(0.0000) index(8)

Title: Label: H1, Spot\_Id: 219681, Peak\_List\_Id: 225000, MSMS Job\_Run\_Id: 21760, Comment:

Data file C:\Documents and Settings\Administrator\Desktop\farah BHU\spot set plate\Farah-Garima 11May 2013\ppw\_H1\_136842035700.txt

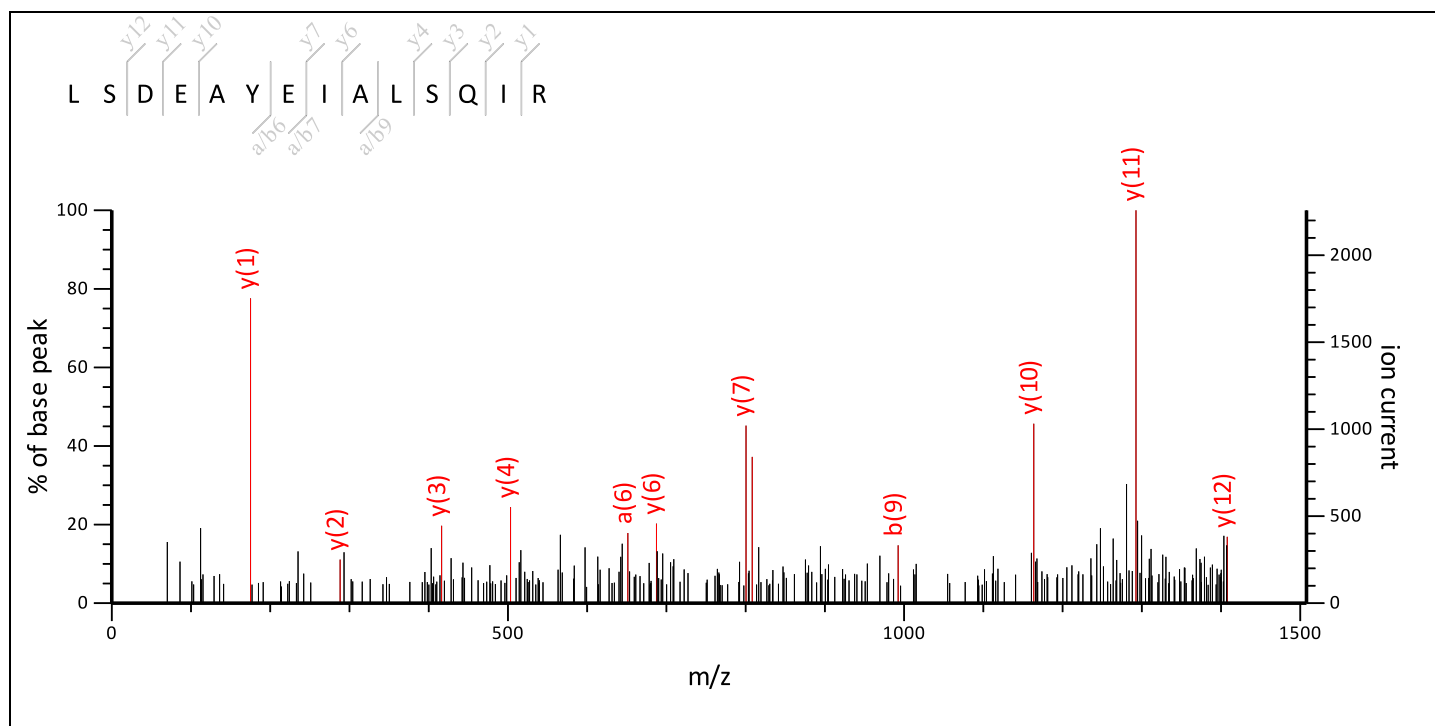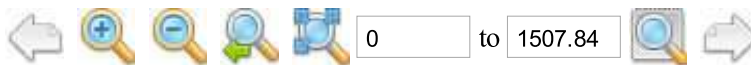

Label all possible matches  Label matches used for scoring

**Monoisotopic mass of neutral peptide Mr(calc):** 1606.8202

**Fixed modifications:** Carbamidomethyl (C) (apply to specified residues or termini only)

**Ions Score:** 48 **Expect:** 0.028

**Matches:** 14/56 fragment ions using 28 most intense peaks ([help](#))

| # | a               | a* | b               | b* | Seq. | y                | y*        | #  |
|---|-----------------|----|-----------------|----|------|------------------|-----------|----|
| 1 | 86.0964         |    | 114.0913        |    | L    |                  |           | 14 |
| 2 | 173.1285        |    | 201.1234        |    | S    | 1494.7435        | 1477.7169 | 13 |
| 3 | <b>288.1554</b> |    | 316.1503        |    | D    | <b>1407.7114</b> | 1390.6849 | 12 |
| 4 | 417.1980        |    | 445.1929        |    | E    | <b>1292.6845</b> | 1275.6579 | 11 |
| 5 | 488.2351        |    | 516.2300        |    | A    | <b>1163.6419</b> | 1146.6154 | 10 |
| 6 | <b>651.2984</b> |    | 679.2933        |    | Y    | 1092.6048        | 1075.5782 | 9  |
| 7 | 780.3410        |    | <b>808.3359</b> |    | E    | 929.5415         | 912.5149  | 8  |

|    |                  |           |                 |           |   |                 |          |   |
|----|------------------|-----------|-----------------|-----------|---|-----------------|----------|---|
| 8  | 893.4251         |           | 921.4200        |           | I | <b>800.4989</b> | 783.4723 | 7 |
| 9  | 964.4622         |           | <b>992.4571</b> |           | A | <b>687.4148</b> | 670.3883 | 6 |
| 10 | 1077.5463        |           | 1105.5412       |           | L | 616.3777        | 599.3511 | 5 |
| 11 | 1164.5783        |           | 1192.5732       |           | S | <b>503.2936</b> | 486.2671 | 4 |
| 12 | <b>1292.6369</b> | 1275.6103 | 1320.6318       | 1303.6052 | Q | <b>416.2616</b> | 399.2350 | 3 |
| 13 | 1405.7209        | 1388.6944 | 1433.7159       | 1416.6893 | I | <b>288.2030</b> | 271.1765 | 2 |
| 14 |                  |           |                 |           | R | <b>175.1190</b> | 158.0924 | 1 |

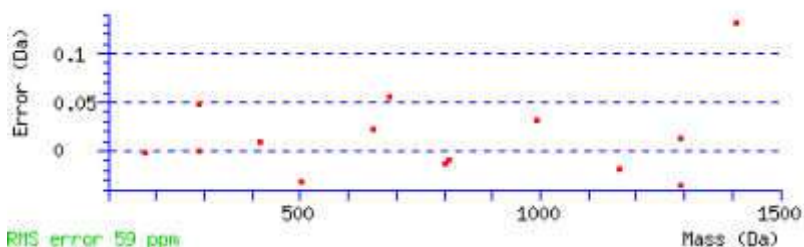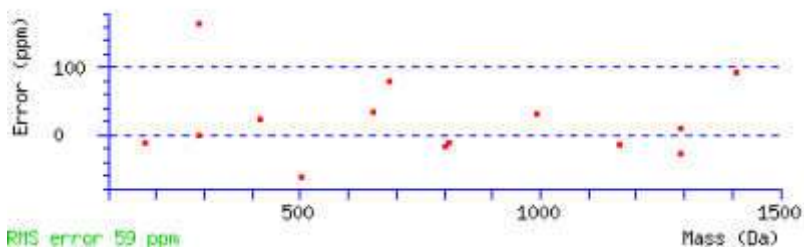

NCBI **BLAST** search of [LSDEAYEIALSQIR](#)

(Parameters: blastp, nr protein database, expect=20000, no filter, PAM30)

Other BLAST [web gateways](#)

#### All matches to this query

| Score | Mr(calc)  | Delta   | Sequence                         |
|-------|-----------|---------|----------------------------------|
| 47.9  | 1606.8202 | 0.0430  | <a href="#">LSDEAYEIALSQIR</a>   |
| 20.5  | 1606.8177 | 0.0455  | <a href="#">SMAYYVINYSKLR</a>    |
| 11.2  | 1606.8865 | -0.0232 | <a href="#">MAFLNNTALSKLR</a>    |
| 9.3   | 1606.8539 | 0.0093  | <a href="#">QAVADHANNLASKIR</a>  |
| 8.2   | 1606.9671 | -0.1039 | <a href="#">LVDIVVFLHRQIR</a>    |
| 8.0   | 1606.8250 | 0.0383  | <a href="#">LSDRGYVMVNGQIR</a>   |
| 7.9   | 1606.8791 | -0.0158 | <a href="#">EAGDASAILPPRAIAR</a> |
| 7.8   | 1606.7813 | 0.0819  | <a href="#">ISDYMYRFLDLR</a>     |
| 7.2   | 1606.7621 | 0.1012  | <a href="#">LSDDGAVETRMELR</a>   |
| 6.7   | 1606.9195 | -0.0563 | <a href="#">LLEFPSLIAQHALR</a>   |

Mascot: <http://www.matrixscience.com/>

# MATRIX SCIENCE Mascot Search Results

## Peptide View **Spot no 101**

MS/MS Fragmentation of **AQGGLGGPNGPGFPLGFGQSR**

Found in **gi|75114857** in **NCBI nr**, RecName: Full=ATP-dependent zinc metalloprotease FTSH 2, chloroplastic; Short=OsFTSH2;  
Flags: Precursor

Match to Query 22: 1970.016724 from(1971.024000,1+) intensity(0.0000) index(9)

Title: Label: H1, Spot\_Id: 219681, Peak\_List\_Id: 224998, MSMS Job\_Run\_Id: 21760, Comment:

Data file C:\Documents and Settings\Administrator\Desktop\farah BHU\spot set plate\Farah-Garima 11May 2013\ppw\_H1\_136842035700.txt

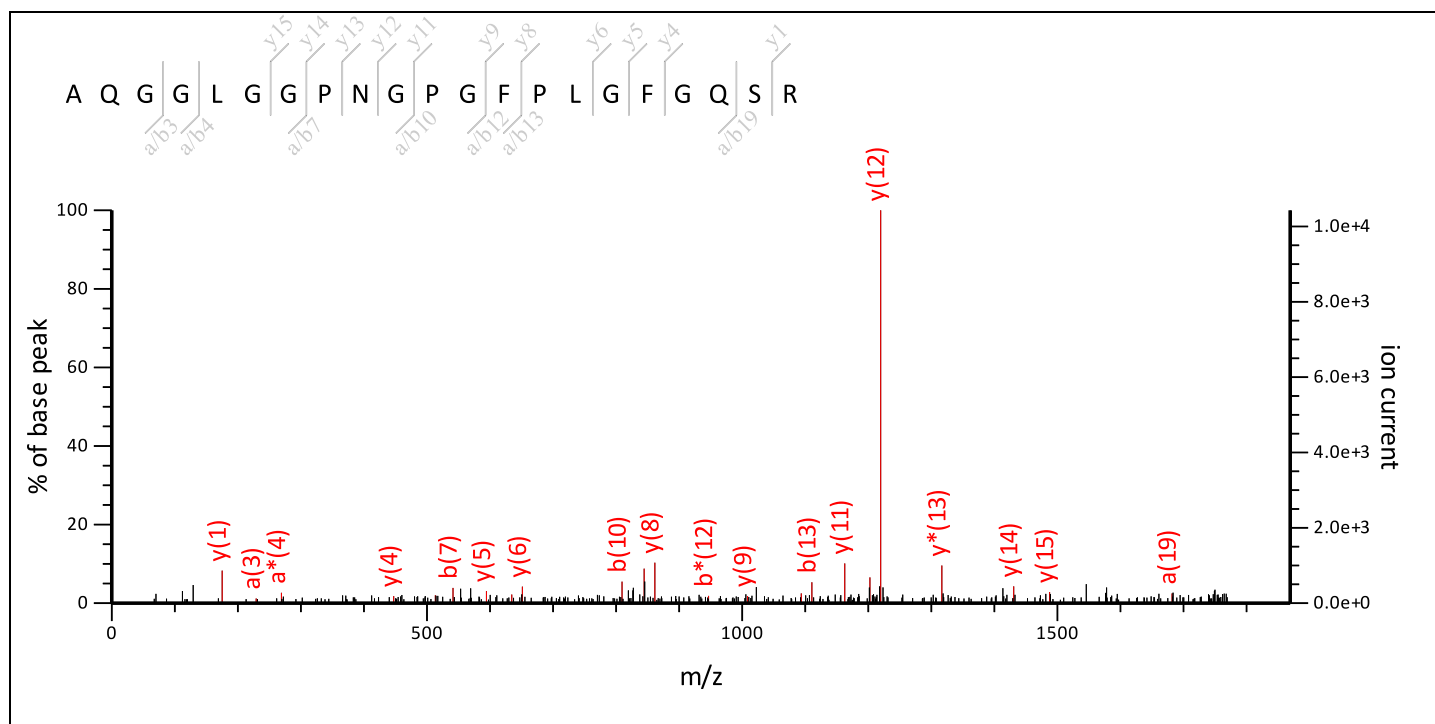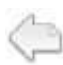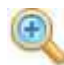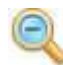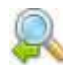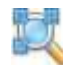

0 to 1869.23

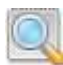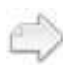

Label all possible matches  Label matches used for scoring

**Monoisotopic mass of neutral peptide Mr(calc):** 1969.9759

**Fixed modifications:** Carbamidomethyl (C) (apply to specified residues or termini only)

**Ions Score:** 22 **Expect:** 9.4

**Matches :** 25/118 fragment ions using 87 most intense peaks ([help](#))

| # | a               | a*              | b               | b*       | Seq. | y                | y*        | #  |
|---|-----------------|-----------------|-----------------|----------|------|------------------|-----------|----|
| 1 | 44.0495         |                 | 72.0444         |          | A    |                  |           | 21 |
| 2 | 172.1081        | 155.0815        | 200.1030        | 183.0764 | Q    | 1899.9460        | 1882.9195 | 20 |
| 3 | <b>229.1295</b> | 212.1030        | 257.1244        | 240.0979 | G    | 1771.8874        | 1754.8609 | 19 |
| 4 | 286.1510        | <b>269.1244</b> | 314.1459        | 297.1193 | G    | 1714.8660        | 1697.8394 | 18 |
| 5 | 399.2350        | 382.2085        | 427.2300        | 410.2034 | L    | 1657.8445        | 1640.8180 | 17 |
| 6 | 456.2565        | 439.2300        | 484.2514        | 467.2249 | G    | 1544.7605        | 1527.7339 | 16 |
| 7 | <b>513.2780</b> | 496.2514        | <b>541.2729</b> | 524.2463 | G    | <b>1487.7390</b> | 1470.7124 | 15 |

|    |                  |                  |                  |                  |   |                  |                  |    |
|----|------------------|------------------|------------------|------------------|---|------------------|------------------|----|
| 8  | 610.3307         | 593.3042         | 638.3257         | 621.2991         | P | <b>1430.7175</b> | 1413.6910        | 14 |
| 9  | 724.3737         | 707.3471         | 752.3686         | 735.3420         | N | 1333.6648        | <b>1316.6382</b> | 13 |
| 10 | 781.3951         | 764.3686         | <b>809.3900</b>  | 792.3635         | G | <b>1219.6218</b> | <b>1202.5953</b> | 12 |
| 11 | 878.4479         | <b>861.4213</b>  | 906.4428         | 889.4163         | P | <b>1162.6004</b> | 1145.5738        | 11 |
| 12 | 935.4694         | 918.4428         | 963.4643         | <b>946.4377</b>  | G | 1065.5476        | 1048.5211        | 10 |
| 13 | 1082.5378        | 1065.5112        | <b>1110.5327</b> | <b>1093.5061</b> | F | <b>1008.5261</b> | 991.4996         | 9  |
| 14 | 1179.5905        | <b>1162.5640</b> | 1207.5854        | 1190.5589        | P | <b>861.4577</b>  | <b>844.4312</b>  | 8  |
| 15 | 1292.6746        | 1275.6480        | 1320.6695        | 1303.6430        | L | 764.4050         | 747.3784         | 7  |
| 16 | 1349.6961        | 1332.6695        | 1377.6910        | 1360.6644        | G | <b>651.3209</b>  | <b>634.2944</b>  | 6  |
| 17 | 1496.7645        | 1479.7379        | 1524.7594        | 1507.7328        | F | <b>594.2994</b>  | 577.2729         | 5  |
| 18 | 1553.7859        | 1536.7594        | 1581.7809        | 1564.7543        | G | <b>447.2310</b>  | 430.2045         | 4  |
| 19 | <b>1681.8445</b> | 1664.8180        | 1709.8394        | 1692.8129        | Q | 390.2096         | 373.1830         | 3  |
| 20 | 1768.8765        | 1751.8500        | 1796.8715        | 1779.8449        | S | 262.1510         | 245.1244         | 2  |
| 21 |                  |                  |                  |                  | R | <b>175.1190</b>  | 158.0924         | 1  |

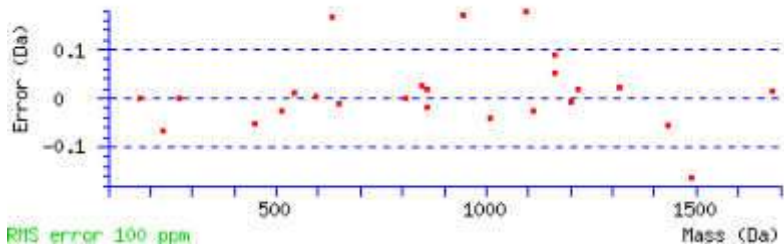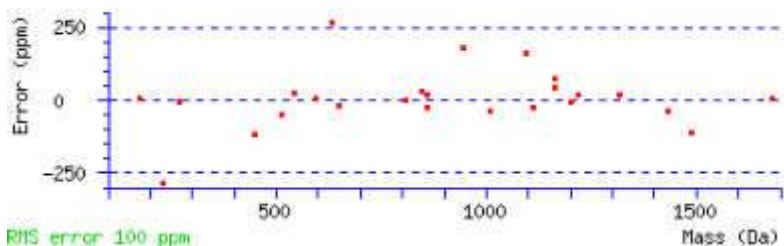

NCBI BLAST search of [AQQGLGGPNGPGFPLGFGQSR](#)

(Parameters: blastp, nr protein database, expect=20000, no filter, PAM30)

Other BLAST [web gateways](#)

#### All matches to this query

| Score | Mr(calc)  | Delta   | Sequence                              |
|-------|-----------|---------|---------------------------------------|
| 22.4  | 1969.9759 | 0.0408  | <a href="#">AQQGLGGPNGPGFPLGFGQSR</a> |
| 4.7   | 1970.1676 | -0.1509 | <a href="#">KILALPTRPQTLISLYR</a>     |
| 4.7   | 1970.0044 | 0.0123  | <a href="#">LSYLGPGGLTARTASFGMR</a>   |
| 4.5   | 1969.9350 | 0.0818  | <a href="#">RLGMGTNMYPSSLLGDR</a>     |
| 4.5   | 1969.9350 | 0.0818  | <a href="#">RLGMGTNMYPSSLLGDR</a>     |
| 4.5   | 1970.0334 | -0.0167 | <a href="#">GANPNVVIGAIVGGPDHLDR</a>  |
| 4.3   | 1969.9455 | 0.0712  | <a href="#">MIGTDAFQETPIVEFTR</a>     |
| 4.1   | 1969.9970 | 0.0197  | <a href="#">QIGGQTHQVAAKVDEYAR</a>    |
| 1.2   | 1969.8622 | 0.1545  | <a href="#">EVMVYGGGGGAMERGAER</a>    |



|     |           |        |                                   |
|-----|-----------|--------|-----------------------------------|
| 0.9 | 1969.9567 | 0.0600 | <a href="#">IELPADLGNEWPSMDKR</a> |
|-----|-----------|--------|-----------------------------------|

|                                                                                          |
|------------------------------------------------------------------------------------------|
| <b>Mascot:</b> <a href="http://www.matrixscience.com/">http://www.matrixscience.com/</a> |
|------------------------------------------------------------------------------------------|


**Mascot Search Results**
**Peptide View**      **Spot no 102**
**MS/MS Fragmentation of SKFESLVNSLIER**

 Found in **gi|115448989** in **NCBI nr**, Os02g0774300 [Oryza sativa Japonica Group]

Match to Query 7: 1520.957424 from(1521.964700,1+) intensity(0.0000) index(2)

Title: Label: J5, Spot\_Id: 228915, Peak\_List\_Id: 257482, MSMS Job\_Run\_Id: 24918, Comment:

Data file ppw\_J5\_138985127800.txt

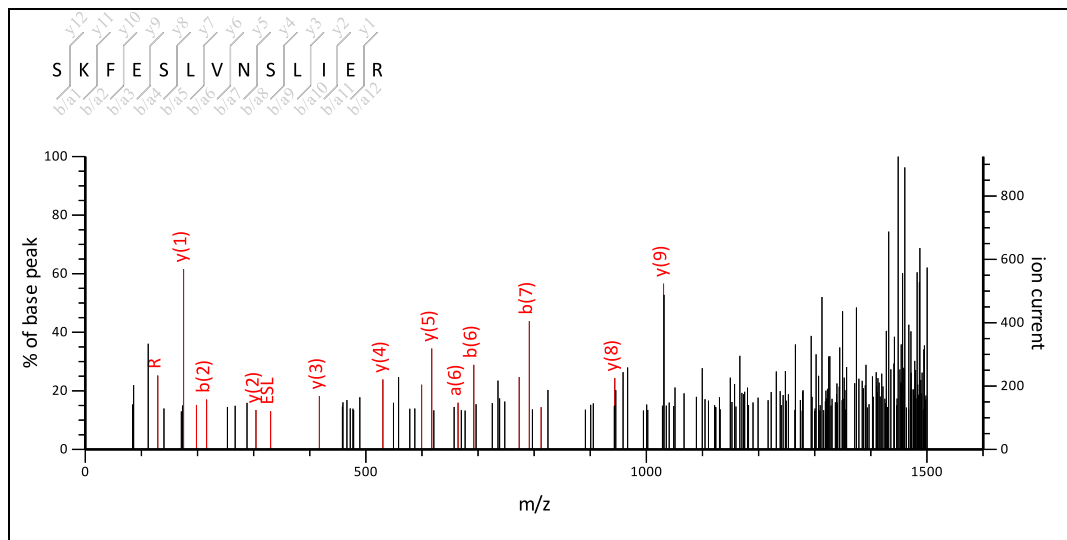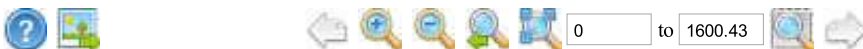
 Label all possible matches       Label matches used for scoring 
**Monoisotopic mass of neutral peptide Mr(calc):** 1520.8198

**Fixed modifications:** Carbamidomethyl (C) (apply to specified residues or termini only)

**Ions Score:** 23      **Expect:** 3

**Matches:** 17/234 fragment ions using 45 most intense peaks ([help](#))

| #  | Immon.          | a               | a*        | a <sup>0</sup> | b               | b*        | b <sup>0</sup>  | d         | d'        | Seq. | v         | w         | w'       | y                | y*        |
|----|-----------------|-----------------|-----------|----------------|-----------------|-----------|-----------------|-----------|-----------|------|-----------|-----------|----------|------------------|-----------|
| 1  | 60.0444         | 60.0444         |           | 42.0338        | 88.0393         |           | 70.0287         | 44.0495   |           | S    |           |           |          |                  |           |
| 2  | 101.1073        | 188.1394        | 171.1128  | 170.1288       | <b>216.1343</b> | 199.1077  | <b>198.1237</b> | 131.0815  |           | K    | 1361.7060 | 1360.7107 |          | 1434.7951        | 1417.7686 |
| 3  | 120.0808        | 335.2078        | 318.1812  | 317.1972       | 363.2027        | 346.1761  | 345.1921        |           |           | F    | 1214.6375 |           |          | 1306.7001        | 1289.6736 |
| 4  | 102.0550        | 464.2504        | 447.2238  | 446.2398       | 492.2453        | 475.2187  | 474.2347        | 406.2449  |           | E    | 1085.5949 | 1084.5997 |          | 1159.6317        | 1142.6052 |
| 5  | 60.0444         | 551.2824        | 534.2558  | 533.2718       | 579.2773        | 562.2508  | 561.2667        | 535.2875  |           | S    | 998.5629  | 997.5677  |          | <b>1030.5891</b> | 1013.5626 |
| 6  | 86.0964         | <b>664.3665</b> | 647.3399  | 646.3559       | <b>692.3614</b> | 675.3348  | 674.3508        | 622.3195  |           | L    | 885.4789  | 884.4836  |          | <b>943.5571</b>  | 926.5306  |
| 7  | 72.0808         | 763.4349        | 746.4083  | 745.4243       | <b>791.4298</b> | 774.4032  | <b>773.4192</b> | 749.4192  |           | V    | 786.4104  | 799.4308  |          | 830.4730         | 813.4465  |
| 8  | 87.0553         | 877.4778        | 860.4512  | 859.4672       | 905.4727        | 888.4462  | 887.4621        | 834.4720  |           | N    | 672.3675  | 671.3723  |          | 731.4046         | 714.3781  |
| 9  | 60.0444         | 964.5098        | 947.4833  | 946.4993       | 992.5047        | 975.4782  | 974.4942        | 948.5149  |           | S    | 585.3355  | 584.3402  |          | <b>617.3617</b>  | 600.3352  |
| 10 | 86.0964         | 1077.5939       | 1060.5673 | 1059.5833      | 1105.5888       | 1088.5622 | 1087.5782       | 1035.5469 |           | L    | 472.2514  | 471.2562  |          | <b>530.3297</b>  | 513.3031  |
| 11 | 86.0964         | 1190.6779       | 1173.6514 | 1172.6674      | 1218.6729       | 1201.6463 | 1200.6623       | 1162.6466 | 1176.6623 | I    | 359.1674  | 372.1878  | 386.2034 | <b>417.2456</b>  | 400.2191  |
| 12 | 102.0550        | 1319.7205       | 1302.6940 | 1301.7100      | 1347.7155       | 1330.6889 | 1329.7049       | 1261.7151 |           | E    | 230.1248  | 229.1295  |          | <b>304.1615</b>  | 287.1350  |
| 13 | <b>129.1135</b> |                 |           |                |                 |           |                 |           |           | R    | 74.0237   | 73.0284   |          | <b>175.1190</b>  | 158.0924  |

| Seq    | ya       | yb       | Seq    | ya       | yb       | Seq     | ya       | yb              |
|--------|----------|----------|--------|----------|----------|---------|----------|-----------------|
| KF     | 248.1757 | 276.1707 | KFE    | 377.2183 | 405.2132 | KFES    | 464.2504 | 492.2453        |
| KFESL  | 577.3344 | 605.3293 | KFESLV | 676.4028 | 704.3978 | FE      | 249.1234 | 277.1183        |
| FES    | 336.1554 | 364.1503 | FESL   | 449.2395 | 477.2344 | FESLV   | 548.3079 | 576.3028        |
| FESLVN | 662.3508 | 690.3457 | ES     | 189.0870 | 217.0819 | ESL     | 302.1710 | <b>330.1660</b> |
| ESLV   | 401.2395 | 429.2344 | ESLVN  | 515.2824 | 543.2773 | ESLVNS  | 602.3144 | 630.3093        |
| SL     | 173.1285 | 201.1234 | SLV    | 272.1969 | 300.1918 | SLVN    | 386.2398 | 414.2347        |
| SLVNS  | 473.2718 | 501.2667 | SLVNSL | 586.3559 | 614.3508 | SLVNSLI | 699.4399 | 727.4349        |

|                        |          |          |                        |          |          |                       |          |          |
|------------------------|----------|----------|------------------------|----------|----------|-----------------------|----------|----------|
| <a href="#">LV</a>     | 185.1648 | 213.1598 | <a href="#">LVN</a>    | 299.2078 | 327.2027 | <a href="#">LVNS</a>  | 386.2398 | 414.2347 |
| <a href="#">LVNSL</a>  | 499.3239 | 527.3188 | <a href="#">LVNSLI</a> | 612.4079 | 640.4028 | <a href="#">VN</a>    | 186.1237 | 214.1186 |
| <a href="#">VNS</a>    | 273.1557 | 301.1506 | <a href="#">VNSL</a>   | 386.2398 | 414.2347 | <a href="#">VNSLI</a> | 499.3239 | 527.3188 |
| <a href="#">VNSLIE</a> | 628.3665 | 656.3614 | <a href="#">NS</a>     | 174.0873 | 202.0822 | <a href="#">NSL</a>   | 287.1714 | 315.1663 |
| <a href="#">NSLI</a>   | 400.2554 | 428.2504 | <a href="#">NSLIE</a>  | 529.2980 | 557.2930 | <a href="#">SL</a>    | 173.1285 | 201.1234 |
| <a href="#">SLI</a>    | 286.2125 | 314.2074 | <a href="#">SLIE</a>   | 415.2551 | 443.2500 | <a href="#">LI</a>    | 199.1805 | 227.1754 |
| <a href="#">LIE</a>    | 328.2231 | 356.2180 | <a href="#">IE</a>     | 215.1390 | 243.1339 |                       |          |          |

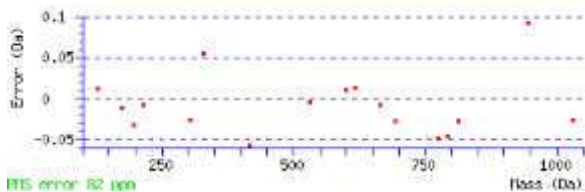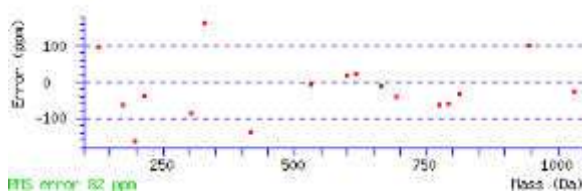

NCBI BLAST search of [SKFESLVNSLIER](#)

(Parameters: blastp, nr protein database, expect=20000, no filter, PAM30)

Other BLAST [web gateways](#)

#### All matches to this query

| Score | Mr(calc)  | Delta  | Sequence                        |
|-------|-----------|--------|---------------------------------|
| 23.2  | 1520.8198 | 0.1376 | <a href="#">SKFESLVNSLIER</a>   |
| 17.6  | 1520.8674 | 0.0900 | <a href="#">KOVSLEDIIHIR</a>    |
| 15.0  | 1520.8198 | 0.1376 | <a href="#">SKFESLVNSLIER</a>   |
| 13.4  | 1520.8463 | 0.1111 | <a href="#">AGQVAKAFGAYGILR</a> |
| 9.2   | 1520.8311 | 0.1264 | <a href="#">ORTLATAYSLIER</a>   |
| 7.7   | 1520.8423 | 0.1151 | <a href="#">QLNLARSAGPPELR</a>  |
| 6.5   | 1520.8133 | 0.1441 | <a href="#">LAMELSRLSQAFR</a>   |
| 5.0   | 1520.8059 | 0.1515 | <a href="#">NIOISHDPSKVQR</a>   |
| 4.9   | 1520.8385 | 0.1190 | <a href="#">SPCSSLVVKIYLR</a>   |
| 3.9   | 1520.9039 | 0.0536 | <a href="#">GLOGVVPKVLNEIR</a>  |

Mascot: <http://www.matrixscience.com/>


**Mascot Search Results**
**Peptide View**      **Spot no 102**
MS/MS Fragmentation of **TPPSVVAFNQKGER**Found in **gi|115448989** in **NCBI nr**, Os02g0774300 [Oryza sativa Japonica Group]

Match to Query 9: 1532.939124 from(1533.946400,1+) intensity(0.0000) index(3)

Title: Label: J5, Spot\_Id: 228915, Peak\_List\_Id: 257483, MSMS Job\_Run\_Id: 24918, Comment:

Data file ppw\_J5\_138985127800.txt

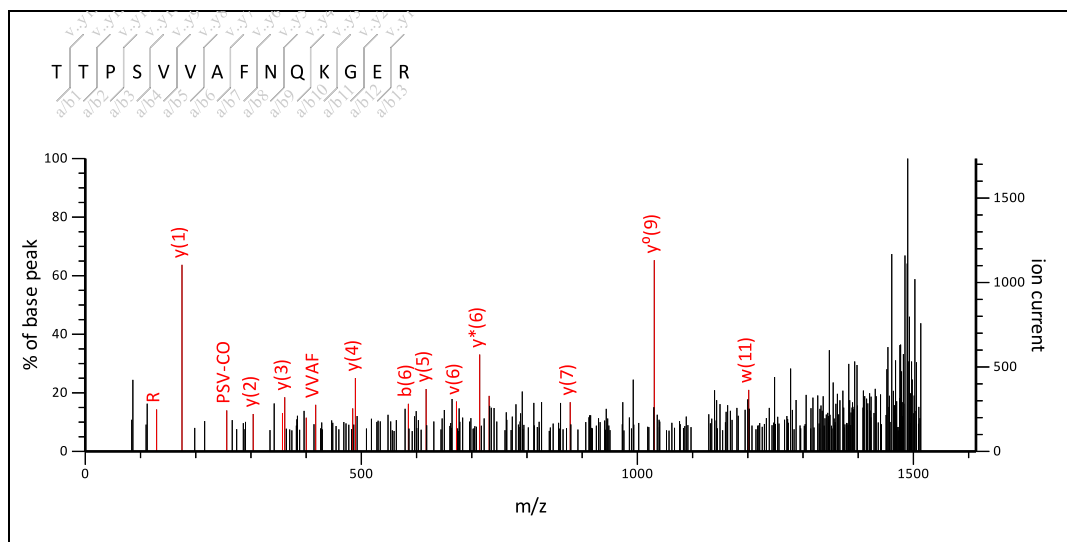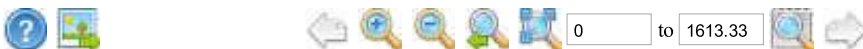Label all possible matches  Label matches used for scoring 

Monoisotopic mass of neutral peptide Mr(calc): 1532.7947

Fixed modifications: Carbamidomethyl (C) (apply to specified residues or termini only)

Ions Score: 15 Expect: 30

Matches: 20/239 fragment ions using 60 most intense peaks ([help](#))

| #  | Immon.   | a         | a*        | a <sup>0</sup> | b         | b*        | b <sup>0</sup> | d         | d'       | Seq. | v         | w         | w'        | y         | y*        |
|----|----------|-----------|-----------|----------------|-----------|-----------|----------------|-----------|----------|------|-----------|-----------|-----------|-----------|-----------|
| 1  | 74.0600  | 74.0600   |           | 56.0495        | 102.0550  |           | 84.0444        | 44.0495   |          | T    |           |           |           |           |           |
| 2  | 74.0600  | 175.1077  |           | 157.0972       | 203.1026  |           | 185.0921       | 159.1128  | 161.0921 | T    | 1386.7124 | 1399.7328 | 1401.7121 | 1432.7543 | 1415.7278 |
| 3  | 70.0651  | 272.1605  |           | 254.1499       | 300.1554  |           | 282.1448       | 246.1448  |          | P    | 1289.6597 | 1288.6644 |           | 1331.7066 | 1314.6801 |
| 4  | 60.0444  | 359.1925  |           | 341.1819       | 387.1874  |           | 369.1769       | 343.1976  |          | S    | 1202.6276 | 1201.6324 |           | 1234.6539 | 1217.6273 |
| 5  | 72.0808  | 458.2609  |           | 440.2504       | 486.2558  |           | 468.2453       | 444.2453  |          | V    | 1103.5592 | 1116.5796 |           | 1147.6218 | 1130.5953 |
| 6  | 72.0808  | 557.3293  |           | 539.3188       | 585.3243  |           | 567.3137       | 543.3137  |          | V    | 1004.4908 | 1017.5112 |           | 1048.5534 | 1031.5269 |
| 7  | 44.0495  | 628.3665  |           | 610.3559       | 656.3614  |           | 638.3508       |           |          | A    | 933.4537  |           |           | 949.4850  | 932.4585  |
| 8  | 120.0808 | 775.4349  |           | 757.4243       | 803.4298  |           | 785.4192       |           |          | F    | 786.3853  |           |           | 878.4479  | 861.4213  |
| 9  | 87.0553  | 889.4778  | 872.4512  | 871.4672       | 917.4727  | 900.4462  | 899.4621       | 846.4720  |          | N    | 672.3424  | 671.3471  |           | 731.3795  | 714.3529  |
| 10 | 101.0709 | 1017.5364 | 1000.5098 | 999.5258       | 1045.5313 | 1028.5047 | 1027.5207      | 960.5149  |          | Q    | 544.2838  | 543.2885  |           | 617.3366  | 600.3100  |
| 11 | 101.1073 | 1145.6313 | 1128.6048 | 1127.6208      | 1173.6263 | 1156.5997 | 1155.6157      | 1088.5735 |          | K    | 416.1888  | 415.1936  |           | 489.2780  | 472.2514  |
| 12 | 30.0338  | 1202.6528 | 1185.6263 | 1184.6422      | 1230.6477 | 1213.6212 | 1212.6371      |           |          | G    |           |           |           | 361.1830  | 344.1565  |
| 13 | 102.0550 | 1331.6954 | 1314.6688 | 1313.6848      | 1359.6903 | 1342.6638 | 1341.6797      | 1273.6899 |          | E    | 230.1248  | 229.1295  |           | 304.1615  | 287.1350  |
| 14 | 129.1135 |           |           |                |           |           |                |           |          | R    | 74.0237   | 73.0284   |           | 175.1190  | 158.0924  |

| Seq   | ya       | yb       | Seq    | ya       | yb       | Seq     | ya       | yb       |
|-------|----------|----------|--------|----------|----------|---------|----------|----------|
| TP    | 171.1128 | 199.1077 | TPS    | 258.1448 | 286.1397 | TPSV    | 357.2132 | 385.2082 |
| TPSVV | 456.2817 | 484.2766 | TPSVVA | 527.3188 | 555.3137 | TPSVVAF | 674.3872 | 702.3821 |
| PS    | 157.0972 | 185.0921 | PSV    | 256.1656 | 284.1605 | PSVV    | 355.2340 | 383.2289 |
| PSVVA | 426.2711 | 454.2660 | PSVVAF | 573.3395 | 601.3344 | PSVVAFN | 687.3824 | 715.3774 |
| SV    | 159.1128 | 187.1077 | SVV    | 258.1812 | 286.1761 | SVVA    | 329.2183 | 357.2132 |
| SVVAF | 476.2867 | 504.2817 | SVVAFN | 590.3297 | 618.3246 | VV      | 171.1492 | 199.1441 |

|        |          |          |        |          |          |        |          |          |
|--------|----------|----------|--------|----------|----------|--------|----------|----------|
| VVA    | 242.1863 | 270.1812 | VVAF   | 389.2547 | 417.2496 | VVAFN  | 503.2976 | 531.2926 |
| VVAFNQ | 631.3562 | 659.3511 | VA     | 143.1179 | 171.1128 | VAF    | 290.1863 | 318.1812 |
| VAFN   | 404.2292 | 432.2241 | VAFNQ  | 532.2878 | 560.2827 | VAFNQK | 660.3828 | 688.3777 |
| AF     | 191.1179 | 219.1128 | AFN    | 305.1608 | 333.1557 | AFNQ   | 433.2194 | 461.2143 |
| AFNQK  | 561.3144 | 589.3093 | AFNQKG | 618.3358 | 646.3307 | FN     | 234.1237 | 262.1186 |
| FNQ    | 362.1823 | 390.1772 | FNQK   | 490.2772 | 518.2722 | FNQKG  | 547.2987 | 575.2936 |
| FNQKGE | 676.3413 | 704.3362 | NQ     | 215.1139 | 243.1088 | NQK    | 343.2088 | 371.2037 |
| NQKG   | 400.2303 | 428.2252 | NQKGE  | 529.2729 | 557.2678 | QK     | 229.1659 | 257.1608 |
| QKG    | 286.1874 | 314.1823 | QKGE   | 415.2300 | 443.2249 | KG     | 158.1288 | 186.1237 |
| KGE    | 287.1714 | 315.1663 | GE     | 159.0764 | 187.0713 |        |          |          |

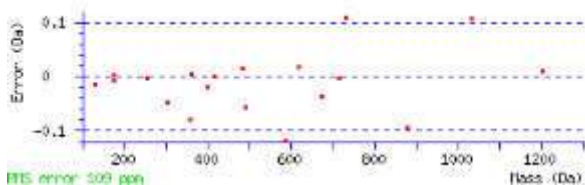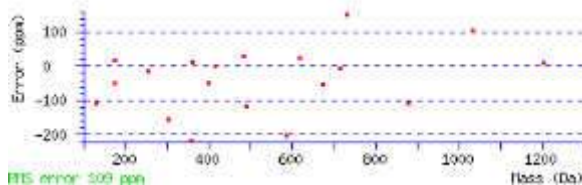

NCBI BLAST search of [TTPSVVAFNOKGER](#)

(Parameters: blastp, nr protein database, expect=20000, no filter, PAM30)

Other BLAST [web gateways](#)

#### All matches to this query

| Score | Mr(calc)  | Delta  | Sequence                        |
|-------|-----------|--------|---------------------------------|
| 15.5  | 1532.8423 | 0.0968 | <a href="#">VSINESRLQNLNR</a>   |
| 15.2  | 1532.7947 | 0.1444 | <a href="#">TTPSVVAFNOKGER</a>  |
| 8.4   | 1532.7947 | 0.1444 | <a href="#">VSFGLSVEQAAAAQR</a> |
| 8.3   | 1532.7868 | 0.1523 | <a href="#">KAGVELLDMGSLER</a>  |
| 7.0   | 1532.8602 | 0.0789 | <a href="#">SVIFPIFEALER</a>    |
| 6.3   | 1532.8351 | 0.1040 | <a href="#">VSLFODILGLSWR</a>   |
| 6.2   | 1532.8306 | 0.1085 | <a href="#">KSMVVADVIPVMTK</a>  |
| 5.9   | 1532.8055 | 0.1337 | <a href="#">VSEAVLLMGLCVSR</a>  |
| 5.0   | 1532.7981 | 0.1410 | <a href="#">GMSSVLLNNSVGOAR</a> |
| 4.8   | 1532.8133 | 0.1258 | <a href="#">AGGFRLRGVMDLER</a>  |

Mascot: <http://www.matrixscience.com/>


**Mascot Search Results**
**Peptide View** Spot no 102
MS/MS Fragmentation of **AVITVPAYFNDAQR**Found in **gi|115448989** in **NCBItr**, Os02g0774300 [Oryza sativa Japonica Group]

Match to Query 11: 1563.948424 from(1564.955700,1+) intensity(0.0000) index(4)

Title: Label: J5, Spot\_Id: 228915, Peak\_List\_Id: 257481, MSMS Job\_Run\_Id: 24918, Comment:

Data file ppw\_J5\_138985127800.txt

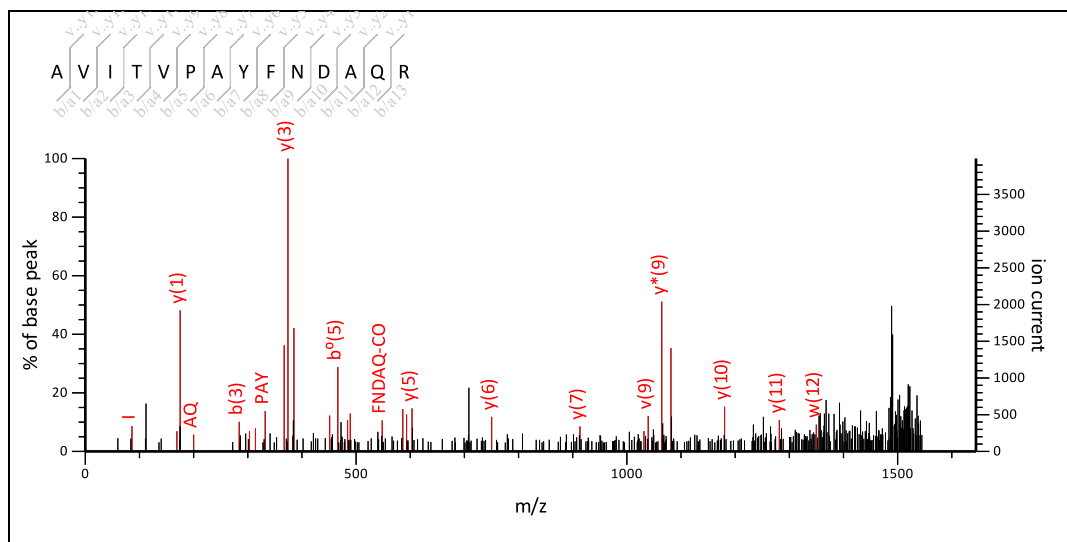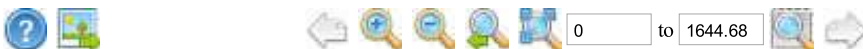Label all possible matches  Label matches used for scoring 

Monoisotopic mass of neutral peptide Mr(calc): 1563.8045

Fixed modifications: Carbamidomethyl (C) (apply to specified residues or termini only)

Ions Score: 50 Expect: 0.013

Matches : 31/226 fragment ions using 60 most intense peaks ([help](#))

| #  | Immon.   | a         | a*        | a <sup>0</sup> | b         | b*        | b <sup>0</sup> | d         | d'       | Seq. | v         | w         | w'        | y         | y*        |
|----|----------|-----------|-----------|----------------|-----------|-----------|----------------|-----------|----------|------|-----------|-----------|-----------|-----------|-----------|
| 1  | 44.0495  | 44.0495   |           |                | 72.0444   |           |                | 44.0495   |          | A    |           |           |           |           |           |
| 2  | 72.0808  | 143.1179  |           |                | 171.1128  |           |                | 129.1022  |          | V    | 1449.7121 | 1462.7325 |           | 1493.7747 | 1476.7482 |
| 3  | 86.0964  | 256.2020  |           |                | 284.1969  |           |                | 228.1707  | 242.1863 | I    | 1336.6280 | 1349.6484 | 1363.6641 | 1394.7063 | 1377.6797 |
| 4  | 74.0600  | 357.2496  |           | 339.2391       | 385.2445  |           | 367.2340       | 341.2547  | 343.2340 | T    | 1235.5804 | 1248.6008 | 1250.5800 | 1281.6222 | 1264.5957 |
| 5  | 72.0808  | 456.3180  |           | 438.3075       | 484.3130  |           | 466.3024       | 442.3024  |          | V    | 1136.5119 | 1149.5324 |           | 1180.5745 | 1163.5480 |
| 6  | 70.0651  | 553.3708  |           | 535.3602       | 581.3657  |           | 563.3552       | 527.3552  |          | P    | 1039.4592 | 1038.4639 |           | 1081.5061 | 1064.4796 |
| 7  | 44.0495  | 624.4079  |           | 606.3974       | 652.4028  |           | 634.3923       |           |          | A    | 968.4221  |           |           | 984.4534  | 967.4268  |
| 8  | 136.0757 | 787.4713  |           | 769.4607       | 815.4662  |           | 797.4556       |           |          | Y    | 805.3587  |           |           | 913.4163  | 896.3897  |
| 9  | 120.0808 | 934.5397  |           | 916.5291       | 962.5346  |           | 944.5240       |           |          | F    | 658.2903  |           |           | 750.3529  | 733.3264  |
| 10 | 87.0553  | 1048.5826 | 1031.5560 | 1030.5720      | 1076.5775 | 1059.5510 | 1058.5669      | 1005.5768 |          | N    | 544.2474  | 543.2522  |           | 603.2845  | 586.2580  |
| 11 | 88.0393  | 1163.6095 | 1146.5830 | 1145.5990      | 1191.6045 | 1174.5779 | 1173.5939      | 1119.6197 |          | D    | 429.2205  | 428.2252  |           | 489.2416  | 472.2150  |
| 12 | 44.0495  | 1234.6467 | 1217.6201 | 1216.6361      | 1262.6416 | 1245.6150 | 1244.6310      |           |          | A    | 358.1833  |           |           | 374.2146  | 357.1881  |
| 13 | 101.0709 | 1362.7052 | 1345.6787 | 1344.6947      | 1390.7001 | 1373.6736 | 1372.6896      | 1305.6838 |          | Q    | 230.1248  | 229.1295  |           | 303.1775  | 286.1510  |
| 14 | 129.1135 |           |           |                |           |           |                |           |          | R    | 74.0237   | 73.0284   |           | 175.1190  | 158.0924  |

| Seq    | ya       | yb       | Seq    | ya       | yb       | Seq    | ya       | yb       |
|--------|----------|----------|--------|----------|----------|--------|----------|----------|
| VI     | 185.1648 | 213.1598 | VIT    | 286.2125 | 314.2074 | VITV   | 385.2809 | 413.2758 |
| VITVP  | 482.3337 | 510.3286 | VITVPA | 553.3708 | 581.3657 | IT     | 187.1441 | 215.1390 |
| ITV    | 286.2125 | 314.2074 | ITVP   | 383.2653 | 411.2602 | ITVPA  | 454.3024 | 482.2973 |
| ITVPAY | 617.3657 | 645.3606 | TV     | 173.1285 | 201.1234 | TVP    | 270.1812 | 298.1761 |
| TVPA   | 341.2183 | 369.2132 | TVPAY  | 504.2817 | 532.2766 | TVPAYF | 651.3501 | 679.3450 |
| VP     | 169.1335 | 197.1285 | VPA    | 240.1707 | 268.1656 | VPAY   | 403.2340 | 431.2289 |

|               |          |                 |               |                 |                 |               |          |                 |
|---------------|----------|-----------------|---------------|-----------------|-----------------|---------------|----------|-----------------|
| <b>VPAYF</b>  | 550.3024 | 578.2973        | <b>VPAYFN</b> | 664.3453        | 692.3402        | <b>PA</b>     | 141.1022 | <b>169.0972</b> |
| <b>PAY</b>    | 304.1656 | <b>332.1605</b> | <b>PAYF</b>   | <b>451.2340</b> | 479.2289        | <b>PAYFN</b>  | 565.2769 | <b>593.2718</b> |
| <b>PAYFND</b> | 680.3039 | 708.2988        | <b>AY</b>     | 207.1128        | 235.1077        | <b>AYF</b>    | 354.1812 | 382.1761        |
| <b>AYFN</b>   | 468.2241 | 496.2191        | <b>AYFND</b>  | 583.2511        | 611.2460        | <b>AYFNDA</b> | 654.2882 | 682.2831        |
| <b>YF</b>     | 283.1441 | 311.1390        | <b>YFN</b>    | 397.1870        | 425.1819        | <b>YFND</b>   | 512.2140 | 540.2089        |
| <b>YFNDA</b>  | 583.2511 | 611.2460        | <b>FN</b>     | 234.1237        | 262.1186        | <b>FND</b>    | 349.1506 | 377.1456        |
| <b>FNDA</b>   | 420.1878 | 448.1827        | <b>FNDAQ</b>  | <b>548.2463</b> | 576.2413        | <b>ND</b>     | 202.0822 | 230.0771        |
| <b>NDA</b>    | 273.1193 | 301.1143        | <b>NDAQ</b>   | 401.1779        | 429.1728        | <b>DA</b>     | 159.0764 | 187.0713        |
| <b>DAQ</b>    | 287.1350 | 315.1299        | <b>AQ</b>     | 172.1081        | <b>200.1030</b> |               |          |                 |

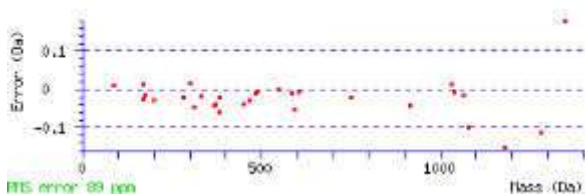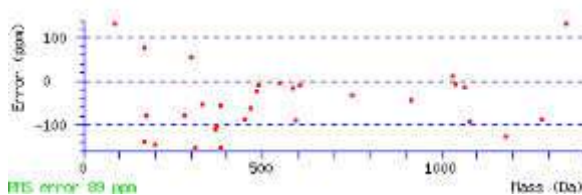

NCBI BLAST search of [AVITVPAYFNDAQR](#)

(Parameters: blastp, nr protein database, expect=20000, no filter, PAM30)

Other BLAST [web gateways](#)

#### All matches to this query

| Score | Mr(calc)  | Delta  | Sequence                         |
|-------|-----------|--------|----------------------------------|
| 49.5  | 1563.8045 | 0.1439 | <a href="#">AVITVPAYFNDAQR</a>   |
| 8.0   | 1563.7926 | 0.1558 | <a href="#">MLSTISSASGGISLPR</a> |
| 6.2   | 1563.8117 | 0.1367 | <a href="#">KSVPASSSAPHNVOR</a>  |
| 4.9   | 1563.8005 | 0.1479 | <a href="#">IDIAASSDREVTNR</a>   |
| 4.5   | 1563.8521 | 0.0963 | <a href="#">IEAAVHVWNLKER</a>    |
| 4.0   | 1563.8113 | 0.1372 | <a href="#">SIMAEALVTIMGKGR</a>  |
| 3.7   | 1563.8153 | 0.1332 | <a href="#">LAEAMLLFEKMPR</a>    |
| 3.2   | 1563.7927 | 0.1558 | <a href="#">ATAASGDIVVSSTMVR</a> |
| 3.2   | 1563.8620 | 0.0864 | <a href="#">ATGSIKSLVYSPSVR</a>  |
| 3.1   | 1563.8555 | 0.0929 | <a href="#">VTALVNTSVAFMRR</a>   |

Mascot: <http://www.matrixscience.com/>



**MATRIX SCIENCE Mascot Search Results**

**Peptide View Spot no 102**

MS/MS Fragmentation of **QAVTNPQNTFFGTR**

Found in **gi|115448989** in **NCBI**nr, Os02g0774300 [Oryza sativa Japonica Group]

Match to Query 15: 1708.022024 from(1709.029300,1+) intensity(0.0000) index(6)

Title: Label: J5, Spot\_Id: 228915, Peak\_List\_Id: 257485, MSMS Job\_Run\_Id: 24918, Comment:

Data file ppw\_J5\_138985127800.txt

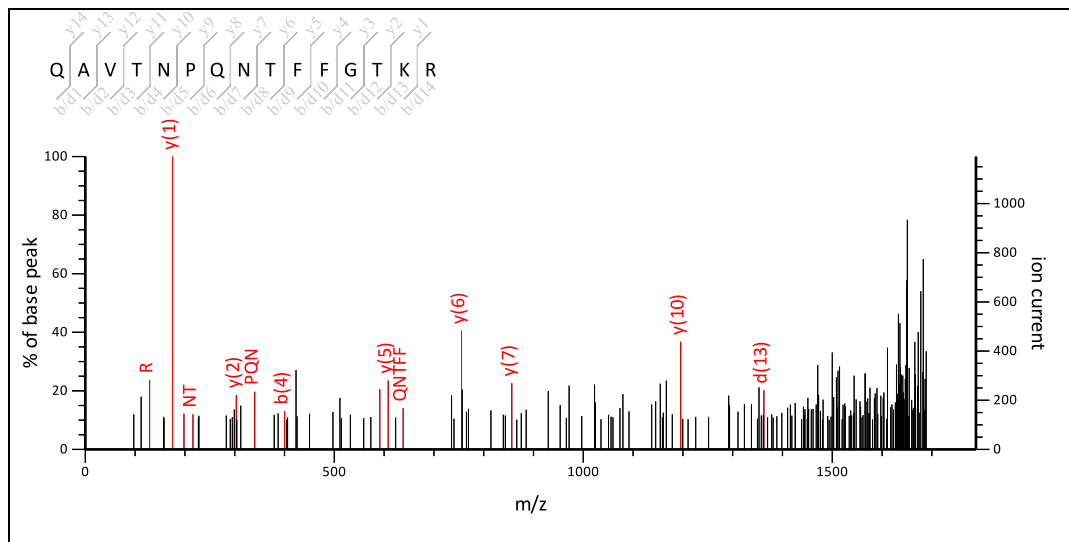

Navigation icons: Home, Back, Forward, Search, Zoom, and a range input field from 0 to 1788.57.

Label all possible matches  Label matches used for scoring

Monoisotopic mass of neutral peptide Mr(calc): 1707.8693

Fixed modifications: Carbamidomethyl (C) (apply to specified residues or termini only)

Ions Score: 19 Expect: 37

Matches : 17/270 fragment ions using 32 most intense peaks [\(help\)](#)

| #  | Immon.   | a         | a*        | a <sup>0</sup> | b         | b*        | b <sup>0</sup> | d         | d'        | Seq. | v         | w         | w'        | y         | y*        |
|----|----------|-----------|-----------|----------------|-----------|-----------|----------------|-----------|-----------|------|-----------|-----------|-----------|-----------|-----------|
| 1  | 101.0709 | 101.0709  | 84.0444   |                | 129.0659  | 112.0393  |                | 44.0495   |           | Q    |           |           |           |           |           |
| 2  | 44.0495  | 172.1081  | 155.0815  |                | 200.1030  | 183.0764  |                |           |           | A    | 1564.7867 |           |           | 1580.8180 | 1563.7914 |
| 3  | 72.0808  | 271.1765  | 254.1499  |                | 299.1714  | 282.1448  |                | 257.1608  |           | V    | 1465.7183 | 1478.7387 |           | 1509.7809 | 1492.7543 |
| 4  | 74.0600  | 372.2241  | 355.1976  | 354.2136       | 400.2191  | 383.1925  | 382.2085       | 356.2292  | 358.2085  | T    | 1364.6706 | 1377.6910 | 1379.6702 | 1410.7124 | 1393.6859 |
| 5  | 87.0553  | 486.2671  | 469.2405  | 468.2565       | 514.2620  | 497.2354  | 496.2514       | 443.2613  |           | N    | 1250.6276 | 1249.6324 |           | 1309.6648 | 1292.6382 |
| 6  | 70.0651  | 583.3198  | 566.2933  | 565.3093       | 611.3148  | 594.2882  | 593.3042       | 557.3042  |           | P    | 1153.5749 | 1152.5796 |           | 1195.6218 | 1178.5953 |
| 7  | 101.0709 | 711.3784  | 694.3519  | 693.3679       | 739.3733  | 722.3468  | 721.3628       | 654.3570  |           | Q    | 1025.5163 | 1024.5211 |           | 1098.5691 | 1081.5425 |
| 8  | 87.0553  | 825.4213  | 808.3948  | 807.4108       | 853.4163  | 836.3897  | 835.4057       | 782.4155  |           | N    | 911.4734  | 910.4781  |           | 970.5105  | 953.4839  |
| 9  | 74.0600  | 926.4690  | 909.4425  | 908.4585       | 954.4639  | 937.4374  | 936.4534       | 910.4741  | 912.4534  | T    | 810.4257  | 823.4461  | 825.4254  | 856.4676  | 839.4410  |
| 10 | 120.0808 | 1073.5374 | 1056.5109 | 1055.5269      | 1101.5324 | 1084.5058 | 1083.5218      |           |           | F    | 663.3573  |           |           | 755.4199  | 738.3933  |
| 11 | 120.0808 | 1220.6058 | 1203.5793 | 1202.5953      | 1248.6008 | 1231.5742 | 1230.5902      |           |           | F    | 516.2889  |           |           | 608.3515  | 591.3249  |
| 12 | 30.0338  | 1277.6273 | 1260.6008 | 1259.6167      | 1305.6222 | 1288.5957 | 1287.6117      |           |           | G    |           |           |           | 461.2831  | 444.2565  |
| 13 | 74.0600  | 1378.6750 | 1361.6484 | 1360.6644      | 1406.6699 | 1389.6434 | 1388.6593      | 1362.6801 | 1364.6593 | T    | 358.2197  | 371.2401  | 373.2194  | 404.2616  | 387.2350  |
| 14 | 101.1073 | 1506.7700 | 1489.7434 | 1488.7594      | 1534.7649 | 1517.7383 | 1516.7543      | 1449.7121 |           | K    | 230.1248  | 229.1295  |           | 303.2139  | 286.1874  |
| 15 | 129.1135 |           |           |                |           |           |                |           |           | R    | 74.0237   | 73.0284   |           | 175.1190  | 158.0924  |

| Seq   | ya       | yb       | Seq    | ya       | yb       | Seq     | ya       | yb       |
|-------|----------|----------|--------|----------|----------|---------|----------|----------|
| AV    | 143.1179 | 171.1128 | AVT    | 244.1656 | 272.1605 | AVTN    | 358.2085 | 386.2034 |
| AVTNP | 455.2613 | 483.2562 | AVTNPQ | 583.3198 | 611.3148 | AVTNPQN | 697.3628 | 725.3577 |
| VT    | 173.1285 | 201.1234 | VTN    | 287.1714 | 315.1663 | VTNP    | 384.2241 | 412.2191 |
| VTNPQ | 512.2827 | 540.2776 | VTNPQN | 626.3257 | 654.3206 | TN      | 188.1030 | 216.0979 |
| TNP   | 285.1557 | 313.1506 | TNPQ   | 413.2143 | 441.2092 | TNPQN   | 527.2572 | 555.2522 |

|        |          |          |        |          |          |        |          |          |
|--------|----------|----------|--------|----------|----------|--------|----------|----------|
| TNPQNT | 628.3049 | 656.2998 | NP     | 184.1081 | 212.1030 | NPQ    | 312.1666 | 340.1615 |
| NPQN   | 426.2096 | 454.2045 | NPQNT  | 527.2572 | 555.2522 | NPQNTF | 674.3257 | 702.3206 |
| PQ     | 198.1237 | 226.1186 | PQN    | 312.1666 | 340.1615 | PQNT   | 413.2143 | 441.2092 |
| PQNTF  | 560.2827 | 588.2776 | QN     | 215.1139 | 243.1088 | QNT    | 316.1615 | 344.1565 |
| QNTF   | 463.2300 | 491.2249 | QNTFF  | 610.2984 | 638.2933 | QNTFFG | 667.3198 | 695.3148 |
| NT     | 188.1030 | 216.0979 | NTF    | 335.1714 | 363.1663 | NTFF   | 482.2398 | 510.2347 |
| NTFFG  | 539.2613 | 567.2562 | NTFFGT | 640.3089 | 668.3039 | TF     | 221.1285 | 249.1234 |
| TF     | 368.1969 | 396.1918 | TFFG   | 425.2183 | 453.2132 | TFFGT  | 526.2660 | 554.2609 |
| TFFGTK | 654.3610 | 682.3559 | FF     | 267.1492 | 295.1441 | FFG    | 324.1707 | 352.1656 |
| FFGT   | 425.2183 | 453.2132 | FFGTK  | 553.3133 | 581.3082 | FG     | 177.1022 | 205.0972 |
| FGT    | 278.1499 | 306.1448 | FGTK   | 406.2449 | 434.2398 | GT     | 131.0815 | 159.0764 |
| GTK    | 259.1765 | 287.1714 | TK     | 202.1550 | 230.1499 |        |          |          |

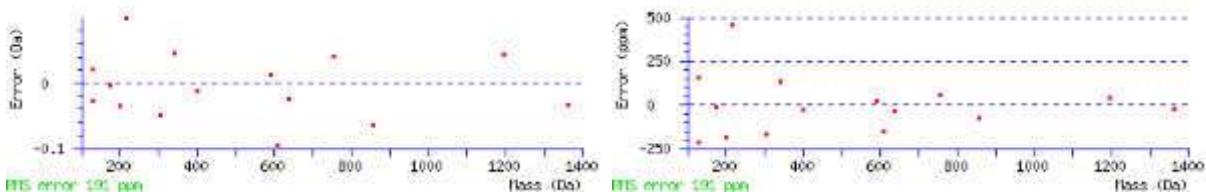

NCBI BLAST search of [QAVTNPONTFFGTR](#)

(Parameters: blastp, nr protein database, expect=20000, no filter, PAM30)

Other BLAST [web gateways](#)

#### All matches to this query

| Score | Mr(calc)  | Delta  | Sequence                           |
|-------|-----------|--------|------------------------------------|
| 18.9  | 1707.8693 | 0.1527 | <a href="#">QAVTNPONTFFGTR</a>     |
| 11.5  | 1707.9189 | 0.1031 | <a href="#">QSSLAIMASSLTLKR</a>    |
| 5.7   | 1707.9090 | 0.1130 | <a href="#">TVKSLNSMPGATPHR</a>    |
| 5.7   | 1707.8904 | 0.1316 | <a href="#">GSQVYPGAKAVEEGPAGR</a> |
| 5.5   | 1707.9229 | 0.0991 | <a href="#">ILIMOGEEITKVYR</a>     |
| 5.1   | 1707.8726 | 0.1494 | <a href="#">LCGPTGTIOAAAGAPAPR</a> |
| 4.5   | 1707.8540 | 0.1681 | <a href="#">EEORDSKPIPEPQR</a>     |
| 4.4   | 1707.9056 | 0.1164 | <a href="#">SRIWLGSYSTAVAAAR</a>   |
| 4.1   | 1707.9169 | 0.1052 | <a href="#">ISRPGLRVYSNYQR</a>     |
| 3.6   | 1707.8766 | 0.1454 | <a href="#">GWLFESMLNTNLLQR</a>    |

Mascot: <http://www.matrixscience.com/>

**MATRIX SCIENCE Mascot Search Results**

**Peptide View Spot no 102**

MS/MS Fragmentation of **SQVFSTAADNQTVGIR**

Found in **gi|115448989** in **NCBINr**, Os02g0774300 [Oryza sativa Japonica Group]

Match to Query 17: 1821.065524 from(1822.072800,1+) intensity(0.0000) index(7)

Title: Label: J5, Spot\_Id: 228915, Peak\_List\_Id: 257484, MSMS Job\_Run\_Id: 24918, Comment:

Data file ppw\_J5\_138985127800.txt

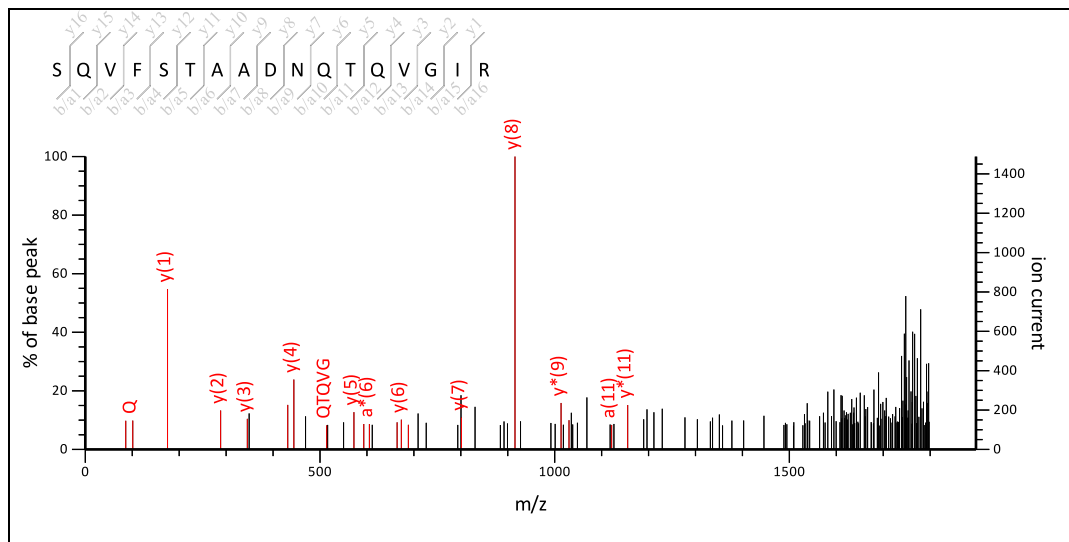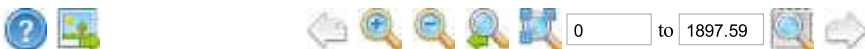

Label all possible matches  Label matches used for scoring

Monoisotopic mass of neutral peptide Mr(calc): 1820.9017

Fixed modifications: Carbamidomethyl (C) (apply to specified residues or termini only)

Ions Score: 25 Expect: 7.8

Matches : 24/326 fragment ions using 62 most intense peaks [\(help\)](#)

| #  | Immon.   | a         | a*        | a <sup>0</sup> | b         | b*        | b <sup>0</sup> | d         | d'        | Seq. | v         | w         | w'        | y         | y*        |
|----|----------|-----------|-----------|----------------|-----------|-----------|----------------|-----------|-----------|------|-----------|-----------|-----------|-----------|-----------|
| 1  | 60.0444  | 60.0444   |           | 42.0338        | 88.0393   |           | 70.0287        | 44.0495   |           | S    |           |           |           |           |           |
| 2  | 101.0709 | 188.1030  | 171.0764  | 170.0924       | 216.0979  | 199.0713  | 198.0873       | 131.0815  |           | Q    | 1661.8242 | 1660.8289 |           | 1734.8769 | 1717.8504 |
| 3  | 72.0808  | 287.1714  | 270.1448  | 269.1608       | 315.1663  | 298.1397  | 297.1557       | 273.1557  |           | V    | 1562.7558 | 1575.7762 |           | 1606.8184 | 1589.7918 |
| 4  | 120.0808 | 434.2398  | 417.2132  | 416.2292       | 462.2347  | 445.2082  | 444.2241       |           |           | F    | 1415.6873 |           |           | 1507.7499 | 1490.7234 |
| 5  | 60.0444  | 521.2718  | 504.2453  | 503.2613       | 549.2667  | 532.2402  | 531.2562       | 505.2769  |           | S    | 1328.6553 | 1327.6601 |           | 1360.6815 | 1343.6550 |
| 6  | 74.0600  | 622.3195  | 605.2930  | 604.3089       | 650.3144  | 633.2879  | 632.3039       | 606.3246  | 608.3039  | T    | 1227.6076 | 1240.6280 | 1242.6073 | 1273.6495 | 1256.6230 |
| 7  | 44.0495  | 693.3566  | 676.3301  | 675.3461       | 721.3515  | 704.3250  | 703.3410       |           |           | A    | 1156.5705 |           |           | 1172.6018 | 1155.5753 |
| 8  | 44.0495  | 764.3937  | 747.3672  | 746.3832       | 792.3886  | 775.3621  | 774.3781       |           |           | A    | 1085.5334 |           |           | 1101.5647 | 1084.5382 |
| 9  | 88.0393  | 879.4207  | 862.3941  | 861.4101       | 907.4156  | 890.3890  | 889.4050       | 835.4308  |           | D    | 970.5065  | 969.5112  |           | 1030.5276 | 1013.5010 |
| 10 | 87.0553  | 993.4636  | 976.4371  | 975.4530       | 1021.4585 | 1004.4320 | 1003.4479      | 950.4578  |           | N    | 856.4635  | 855.4683  |           | 915.5007  | 898.4741  |
| 11 | 101.0709 | 1121.5222 | 1104.4956 | 1103.5116      | 1149.5171 | 1132.4905 | 1131.5065      | 1064.5007 |           | Q    | 728.4050  | 727.4097  |           | 801.4577  | 784.4312  |
| 12 | 74.0600  | 1222.5699 | 1205.5433 | 1204.5593      | 1250.5648 | 1233.5382 | 1232.5542      | 1206.5749 | 1208.5542 | T    | 627.3573  | 640.3777  | 642.3570  | 673.3992  | 656.3726  |
| 13 | 101.0709 | 1350.6284 | 1333.6019 | 1332.6179      | 1378.6234 | 1361.5968 | 1360.6128      | 1293.6070 |           | Q    | 499.2987  | 498.3035  |           | 572.3515  | 555.3249  |
| 14 | 72.0808  | 1449.6968 | 1432.6703 | 1431.6863      | 1477.6918 | 1460.6652 | 1459.6812      | 1435.6812 |           | V    | 400.2303  | 413.2507  |           | 444.2929  | 427.2663  |
| 15 | 30.0338  | 1506.7183 | 1489.6918 | 1488.7077      | 1534.7132 | 1517.6867 | 1516.7027      |           |           | G    |           |           |           | 345.2245  | 328.1979  |
| 16 | 86.0964  | 1619.8024 | 1602.7758 | 1601.7918      | 1647.7973 | 1630.7707 | 1629.7867      | 1591.7711 | 1605.7867 | I    | 230.1248  | 243.1452  | 257.1608  | 288.2030  | 271.1765  |
| 17 | 129.1135 |           |           |                |           |           |                |           |           | R    | 74.0237   | 73.0284   |           | 175.1190  | 158.0924  |

| Seq   | ya       | yb       | Seq    | ya       | yb       | Seq     | ya       | yb       |
|-------|----------|----------|--------|----------|----------|---------|----------|----------|
| QV    | 200.1394 | 228.1343 | QVF    | 347.2078 | 375.2027 | QVFS    | 434.2398 | 462.2347 |
| QVFST | 535.2875 | 563.2824 | QVFSTA | 606.3246 | 634.3195 | QVFSTAA | 677.3617 | 705.3566 |
| VF    | 219.1492 | 247.1441 | VFS    | 306.1812 | 334.1761 | VFST    | 407.2289 | 435.2238 |

|               |          |          |               |          |          |                |          |          |
|---------------|----------|----------|---------------|----------|----------|----------------|----------|----------|
| <b>VFSTA</b>  | 478.2660 | 506.2609 | <b>VFSTAA</b> | 549.3031 | 577.2980 | <b>VFSTAAD</b> | 664.3301 | 692.3250 |
| <b>FS</b>     | 207.1128 | 235.1077 | <b>FST</b>    | 308.1605 | 336.1554 | <b>FSTA</b>    | 379.1976 | 407.1925 |
| <b>FSTAA</b>  | 450.2347 | 478.2296 | <b>FSTAAD</b> | 565.2617 | 593.2566 | <b>FSTAADN</b> | 679.3046 | 707.2995 |
| <b>ST</b>     | 161.0921 | 189.0870 | <b>STA</b>    | 232.1292 | 260.1241 | <b>STAA</b>    | 303.1663 | 331.1612 |
| <b>STAAD</b>  | 418.1932 | 446.1882 | <b>STAADN</b> | 532.2362 | 560.2311 | <b>STAADNQ</b> | 660.2947 | 688.2897 |
| <b>TA</b>     | 145.0972 | 173.0921 | <b>TAA</b>    | 216.1343 | 244.1292 | <b>TAAD</b>    | 331.1612 | 359.1561 |
| <b>TAADN</b>  | 445.2041 | 473.1991 | <b>TAADNQ</b> | 573.2627 | 601.2576 | <b>TAADNQT</b> | 674.3104 | 702.3053 |
| <b>AA</b>     | 115.0866 | 143.0815 | <b>AAD</b>    | 230.1135 | 258.1084 | <b>AADN</b>    | 344.1565 | 372.1514 |
| <b>AADNQ</b>  | 472.2150 | 500.2100 | <b>AADNQT</b> | 573.2627 | 601.2576 | <b>AD</b>      | 159.0764 | 187.0713 |
| <b>ADN</b>    | 273.1193 | 301.1143 | <b>ADNQ</b>   | 401.1779 | 429.1728 | <b>ADNQT</b>   | 502.2256 | 530.2205 |
| <b>ADNQQT</b> | 630.2842 | 658.2791 | <b>DN</b>     | 202.0822 | 230.0771 | <b>DNQ</b>     | 330.1408 | 358.1357 |
| <b>DNQT</b>   | 431.1885 | 459.1834 | <b>DNQQT</b>  | 559.2471 | 587.2420 | <b>DNQQTQV</b> | 658.3155 | 686.3104 |
| <b>NQ</b>     | 215.1139 | 243.1088 | <b>NQT</b>    | 316.1615 | 344.1565 | <b>NQTQ</b>    | 444.2201 | 472.2150 |
| <b>NQTQV</b>  | 543.2885 | 571.2835 | <b>NQTQVG</b> | 600.3100 | 628.3049 | <b>QT</b>      | 202.1186 | 230.1135 |
| <b>QTQ</b>    | 330.1772 | 358.1721 | <b>QTQV</b>   | 429.2456 | 457.2405 | <b>QTQVG</b>   | 486.2671 | 514.2620 |
| <b>QTQVGI</b> | 599.3511 | 627.3461 | <b>TQ</b>     | 202.1186 | 230.1135 | <b>TQV</b>     | 301.1870 | 329.1819 |
| <b>TQVG</b>   | 358.2085 | 386.2034 | <b>TQVGI</b>  | 471.2926 | 499.2875 | <b>QV</b>      | 200.1394 | 228.1343 |
| <b>QVG</b>    | 257.1608 | 285.1557 | <b>QVGI</b>   | 370.2449 | 398.2398 | <b>VG</b>      | 129.1022 | 157.0972 |
| <b>VGI</b>    | 242.1863 | 270.1812 | <b>GI</b>     | 143.1179 | 171.1128 |                |          |          |

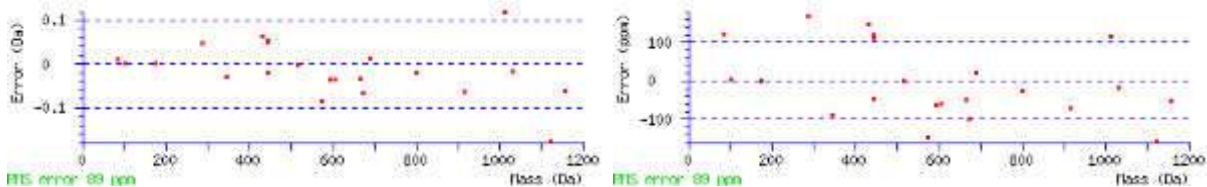

NCBI BLAST search of [SOVFSTAADNQTOVGIR](#)  
 (Parameters: blastp, nr protein database, expect=20000, no filter, PAM30)  
 Other BLAST [web gateways](#)

All matches to this query

| Score | Mr(cale)  | Delta  | Sequence                          |
|-------|-----------|--------|-----------------------------------|
| 24.5  | 1820.9017 | 0.1638 | <a href="#">SOVFSTAADNQTOVGIR</a> |
| 11.6  | 1820.9322 | 0.1333 | <a href="#">AWWSQTFDIAATRLR</a>   |
| 9.6   | 1820.8945 | 0.1710 | <a href="#">GLGFPAEDLEVSGFDLR</a> |
| 8.8   | 1820.9930 | 0.0725 | <a href="#">MIRAYTQSAATLNLLR</a>  |
| 8.0   | 1820.9454 | 0.1201 | <a href="#">EGLAPINLVIETEMHR</a>  |
| 7.1   | 1820.9421 | 0.1235 | <a href="#">WEDYSLINKGSIQLR</a>   |
| 6.6   | 1820.9376 | 0.1279 | <a href="#">KVLMDDSMVLGDTIR</a>   |
| 6.1   | 1820.8913 | 0.1742 | <a href="#">ALRLMEEMPYPKPDGR</a>  |
| 6.0   | 1820.9706 | 0.0949 | <a href="#">ITMYPALTELOEKIR</a>   |
| 5.9   | 1821.0182 | 0.0473 | <a href="#">VKGTMNLNSTVLVQLR</a>  |

Mascot: <http://www.matrixscience.com/>



# Mascot Search Results

## Peptide View Spot no 104

### MS/MS Fragmentation of **IAGLEVLR**

Found in **gi|6746592** in **NCBI**nr, heat shock protein 70 [Arabidopsis thaliana]

Match to Query 2: 869.582934 from(870.590210,1+) intensity(0.0000) index(0)

Title: Label: F1, Spot\_Id: 219679, Peak\_List\_Id: 224947, MSMS Job\_Run\_Id: 21758, Comment:

Data file C:\Documents and Settings\Administrator\Desktop\farah BHU\spot set plate\Farah-Garima 11May 2013\ppw\_F1\_136842030500.txt

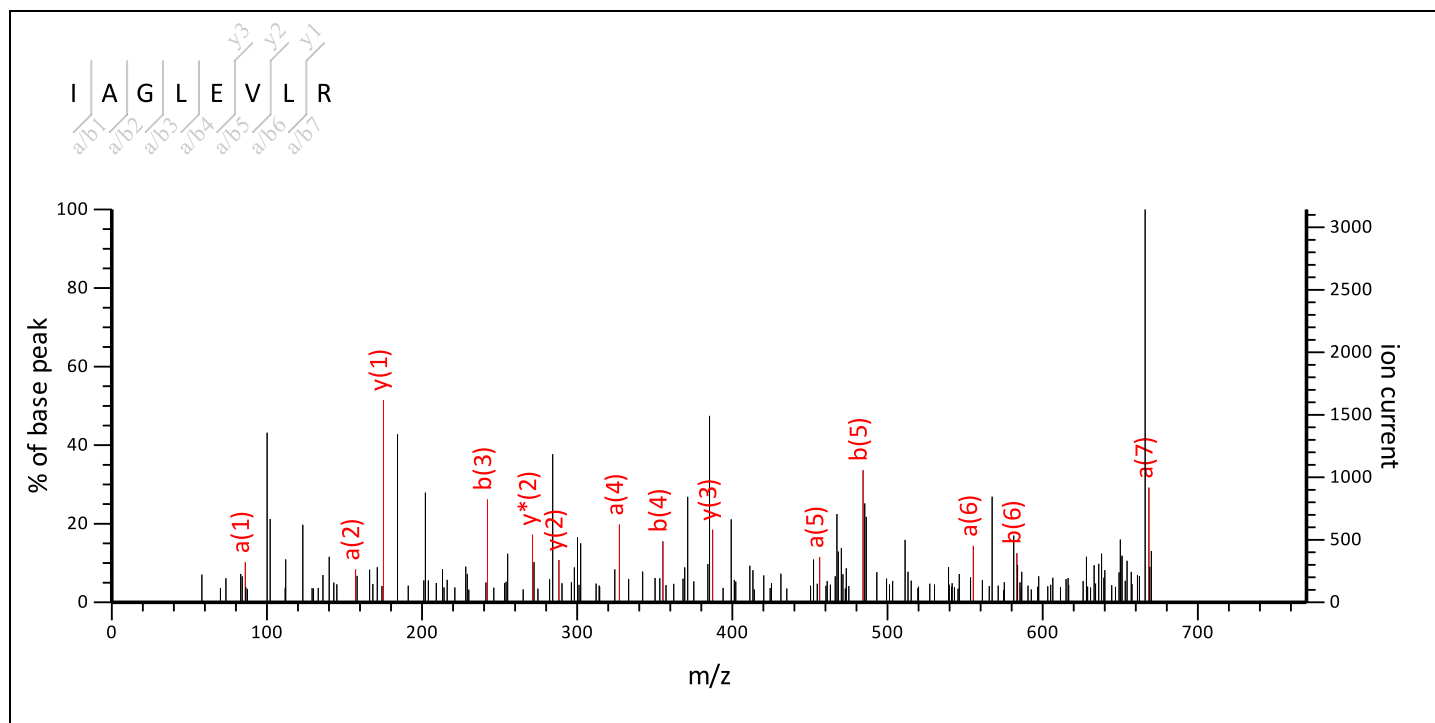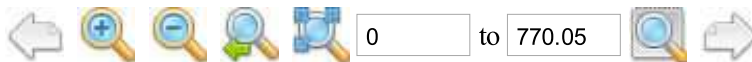

Label all possible matches  Label matches used for scoring

**Monoisotopic mass of neutral peptide Mr(calc):** 869.5334

**Fixed modifications:** Carbamidomethyl (C) (apply to specified residues or termini only)

**Ions Score:** 20 **Expect:** 7.1

**Matches:** 14/28 fragment ions using 48 most intense peaks ([help](#))

| # | a               | b               | Seq.     | y               | y*              | #        |
|---|-----------------|-----------------|----------|-----------------|-----------------|----------|
| 1 | <b>86.0964</b>  | 114.0913        | <b>I</b> |                 |                 | <b>8</b> |
| 2 | <b>157.1335</b> | 185.1285        | <b>A</b> | 757.4567        | 740.4301        | <b>7</b> |
| 3 | 214.1550        | <b>242.1499</b> | <b>G</b> | 686.4196        | 669.3930        | <b>6</b> |
| 4 | <b>327.2391</b> | <b>355.2340</b> | <b>L</b> | 629.3981        | 612.3715        | <b>5</b> |
| 5 | <b>456.2817</b> | <b>484.2766</b> | <b>E</b> | 516.3140        | 499.2875        | <b>4</b> |
| 6 | <b>555.3501</b> | <b>583.3450</b> | <b>V</b> | <b>387.2714</b> | 370.2449        | <b>3</b> |
| 7 | <b>668.4341</b> | 696.4291        | <b>L</b> | <b>288.2030</b> | <b>271.1765</b> | <b>2</b> |
| 8 |                 |                 | <b>R</b> | <b>175.1190</b> | 158.0924        | <b>1</b> |

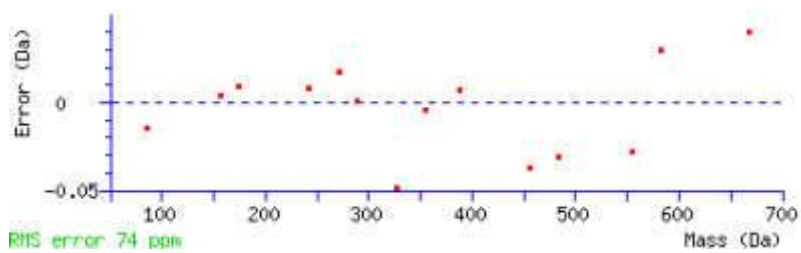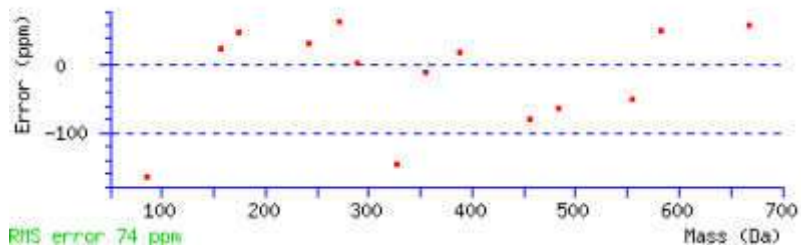

NCBI **BLAST** search of [IAGLEVLR](#)

(Parameters: blastp, nr protein database, expect=20000, no filter, PAM30)

Other BLAST [web gateways](#)

#### All matches to this query

| Score | Mr(calc) | Delta  | Sequence                   |
|-------|----------|--------|----------------------------|
| 25.1  | 869.5083 | 0.0747 | <a href="#">EIRLPSR</a>    |
| 25.1  | 869.5083 | 0.0747 | <a href="#">ELRLPSR</a>    |
| 25.1  | 869.5083 | 0.0747 | <a href="#">ERILPSR</a>    |
| 25.1  | 869.5083 | 0.0747 | <a href="#">ERLIPSR</a>    |
| 22.6  | 869.5083 | 0.0746 | <a href="#">IQGNAVLR</a>   |
| 20.2  | 869.5334 | 0.0495 | <a href="#">IAGLEVLR</a>   |
| 19.3  | 869.5334 | 0.0495 | <a href="#">VALDALLR</a>   |
| 19.1  | 869.5195 | 0.0634 | <a href="#">RGGGGVVLRL</a> |
| 19.0  | 869.5335 | 0.0495 | <a href="#">TVVVSPILR</a>  |
| 18.2  | 869.5157 | 0.0673 | <a href="#">LAMAVPLRL</a>  |

Mascot: <http://www.matrixscience.com/>



# Mascot Search Results

## Peptide View Spot no 104

### MS/MS Fragmentation of **DIDEVILVGGSTR**

Found in **gi|6746592** in **NCBI nr**, heat shock protein 70 [Arabidopsis thaliana]

Match to Query 82: 1372.761024 from(1373.768300,1+) intensity(0.0000) index(16)

Title: Label: F1, Spot\_Id: 219679, Peak\_List\_Id: 224942, MSMS Job\_Run\_Id: 21758, Comment:

Data file C:\Documents and Settings\Administrator\Desktop\farah BHU\spot set plate\Farah-Garima 11May 2013\ppw\_F1\_136842030500.txt

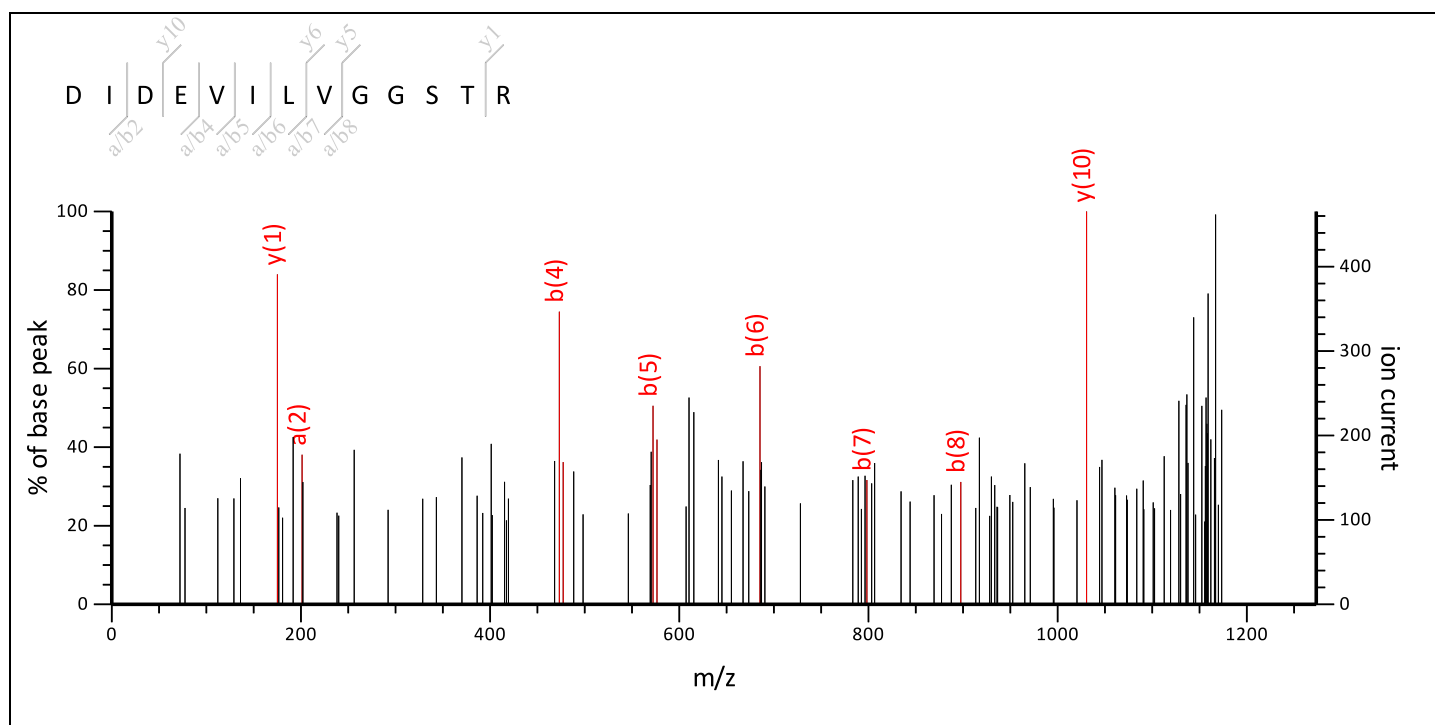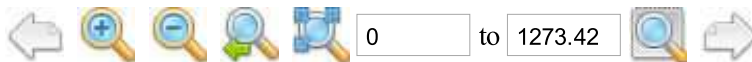

Label all possible matches  Label matches used for scoring

**Monoisotopic mass of neutral peptide Mr(calc):** 1372.7198

**Fixed modifications:** Carbamidomethyl (C) (apply to specified residues or termini only)

**Ions Score:** 6 **Expect:** 4.5e+02

**Matches:** 10/48 fragment ions using 45 most intense peaks ([help](#))

| # | a               | b               | Seq.     | y                | y*        | #         |
|---|-----------------|-----------------|----------|------------------|-----------|-----------|
| 1 | 88.0393         | 116.0342        | <b>D</b> |                  |           | <b>13</b> |
| 2 | <b>201.1234</b> | 229.1183        | <b>I</b> | 1258.7001        | 1241.6736 | <b>12</b> |
| 3 | 316.1503        | 344.1452        | <b>D</b> | 1145.6161        | 1128.5895 | <b>11</b> |
| 4 | 445.1929        | <b>473.1878</b> | <b>E</b> | <b>1030.5891</b> | 1013.5626 | <b>10</b> |
| 5 | 544.2613        | <b>572.2562</b> | <b>V</b> | 901.5465         | 884.5200  | <b>9</b>  |
| 6 | 657.3454        | <b>685.3403</b> | <b>I</b> | 802.4781         | 785.4516  | <b>8</b>  |
| 7 | 770.4294        | <b>798.4244</b> | <b>L</b> | 689.3941         | 672.3675  | <b>7</b>  |
| 8 | 869.4979        | <b>897.4928</b> | <b>V</b> | <b>576.3100</b>  | 559.2835  | <b>6</b>  |



|    |           |           |   |                 |          |   |
|----|-----------|-----------|---|-----------------|----------|---|
| 9  | 926.5193  | 954.5142  | G | <b>477.2416</b> | 460.2150 | 5 |
| 10 | 983.5408  | 1011.5357 | G | 420.2201        | 403.1936 | 4 |
| 11 | 1070.5728 | 1098.5677 | S | 363.1987        | 346.1721 | 3 |
| 12 | 1171.6205 | 1199.6154 | T | 276.1666        | 259.1401 | 2 |
| 13 |           |           | R | <b>175.1190</b> | 158.0924 | 1 |

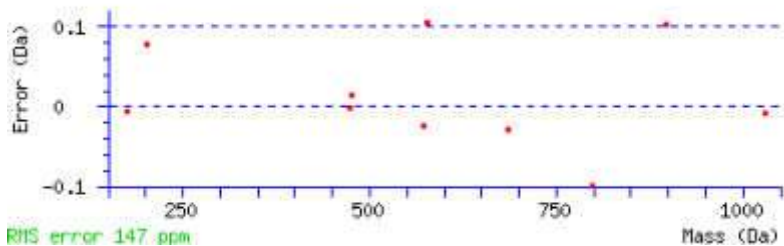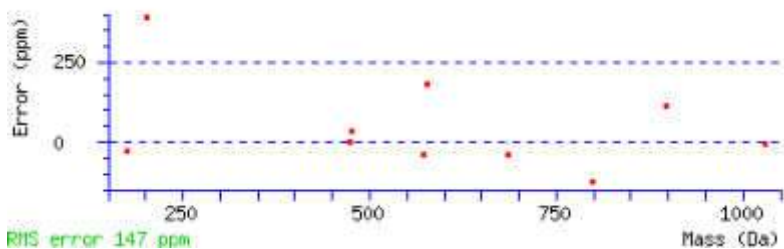

NCBI **BLAST** search of [DIDEVILVGGSTR](#)

(Parameters: blastp, nr protein database, expect=20000, no filter, PAM30)

Other BLAST [web gateways](#)

#### All matches to this query

| Score | Mr(calc)  | Delta   | Sequence                      |
|-------|-----------|---------|-------------------------------|
| 9.7   | 1372.7133 | 0.0478  | <a href="#">VLNASEVGMALNR</a> |
| 6.5   | 1372.6834 | 0.0776  | <a href="#">AESIEELEAQVR</a>  |
| 6.3   | 1372.7198 | 0.0412  | <a href="#">DIDEVILVGGSTR</a> |
| 6.3   | 1372.7198 | 0.0412  | <a href="#">DIDEVILVGGSTR</a> |
| 6.3   | 1372.7198 | 0.0412  | <a href="#">DLDEVILVGGSTR</a> |
| 5.9   | 1372.7463 | 0.0147  | <a href="#">QYANVLDKPLGR</a>  |
| 3.6   | 1372.7350 | 0.0260  | <a href="#">ETLEIFAPLANR</a>  |
| 2.8   | 1372.6371 | 0.1239  | <a href="#">QSKESFGGYTNR</a>  |
| 2.5   | 1372.7939 | -0.0329 | <a href="#">AGYLRLVGGIAR</a>  |
| 2.5   | 1372.7939 | -0.0329 | <a href="#">LGRQLVFSNLAR</a>  |

Mascot: <http://www.matrixscience.com/>



# Mascot Search Results

## Peptide View **Spot no 104**

MS/MS Fragmentation of **QFAAEEISAQVLR**

Found in **gi|6746592** in **NCBI nr**, heat shock protein 70 [Arabidopsis thaliana]

Match to Query 90: 1460.814724 from(1461.822000,1+) intensity(0.0000) index(19)

Title: Label: F1, Spot\_Id: 219679, Peak\_List\_Id: 224932, MSMS Job\_Run\_Id: 21758, Comment:

Data file C:\Documents and Settings\Administrator\Desktop\farah BHU\spot set plate\Farah-Garima 11May 2013\ppw\_F1\_136842030500.txt

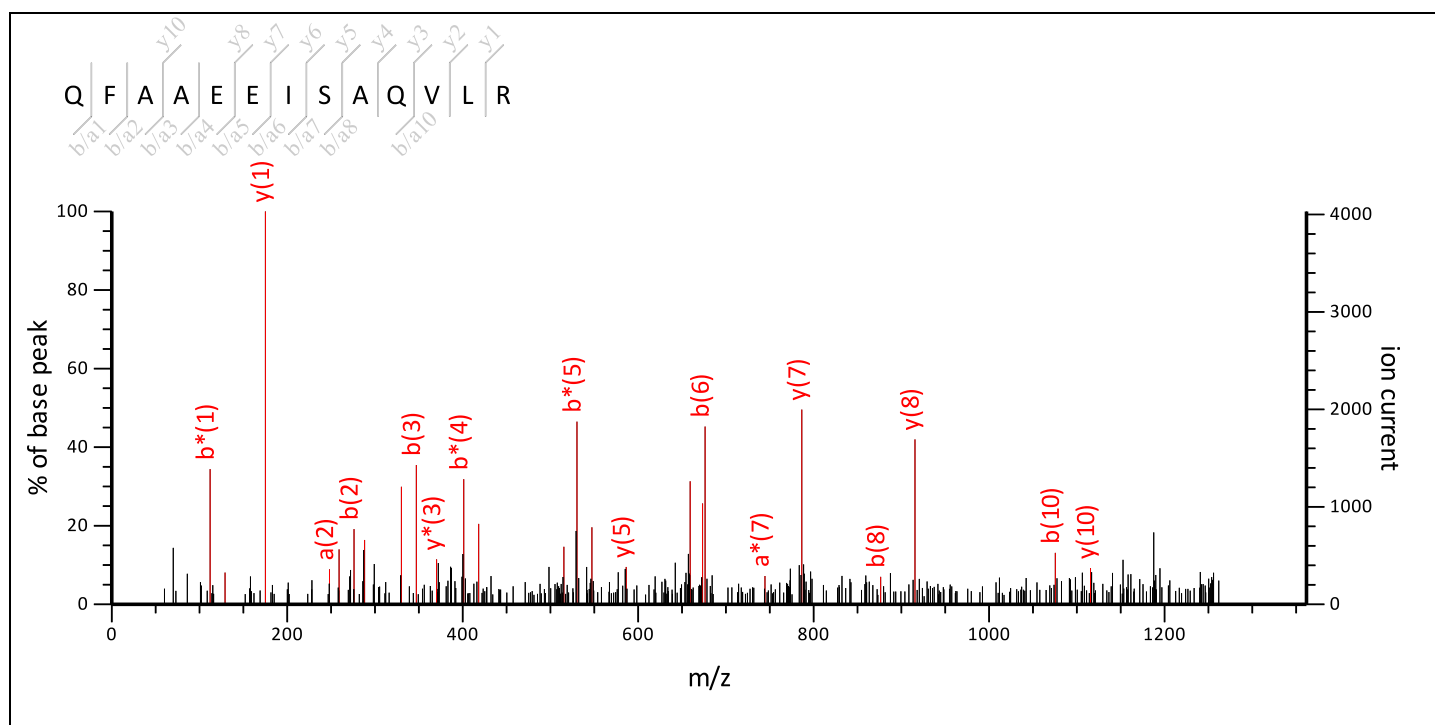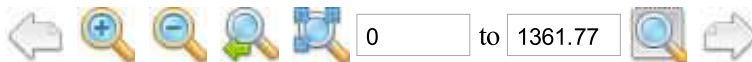

Label all possible matches  Label matches used for scoring

**Monoisotopic mass of neutral peptide Mr(calc):** 1460.7623

**Fixed modifications:** Carbamidomethyl (C) (apply to specified residues or termini only)

**Ions Score:** 54 **Expect:** 0.0072

**Matches :** 25/72 fragment ions using 49 most intense peaks ([help](#))

| # | a               | a*              | b               | b*              | Seq. | y                | y*        | #  |
|---|-----------------|-----------------|-----------------|-----------------|------|------------------|-----------|----|
| 1 | 101.0709        | 84.0444         | <b>129.0659</b> | <b>112.0393</b> | Q    |                  |           | 13 |
| 2 | <b>248.1394</b> | 231.1128        | <b>276.1343</b> | <b>259.1077</b> | F    | 1333.7110        | 1316.6845 | 12 |
| 3 | 319.1765        | 302.1499        | <b>347.1714</b> | <b>330.1448</b> | A    | 1186.6426        | 1169.6161 | 11 |
| 4 | 390.2136        | 373.1870        | <b>418.2085</b> | <b>401.1819</b> | A    | <b>1115.6055</b> | 1098.5790 | 10 |
| 5 | 519.2562        | 502.2296        | <b>547.2511</b> | <b>530.2245</b> | E    | 1044.5684        | 1027.5419 | 9  |
| 6 | 648.2988        | 631.2722        | <b>676.2937</b> | <b>659.2671</b> | E    | <b>915.5258</b>  | 898.4993  | 8  |
| 7 | 761.3828        | <b>744.3563</b> | 789.3777        | 772.3512        | I    | <b>786.4832</b>  | 769.4567  | 7  |
| 8 | 848.4149        | 831.3883        | <b>876.4098</b> | 859.3832        | S    | <b>673.3991</b>  | 656.3726  | 6  |

|    |           |           |                  |           |   |                 |                 |   |
|----|-----------|-----------|------------------|-----------|---|-----------------|-----------------|---|
| 9  | 919.4520  | 902.4254  | 947.4469         | 930.4203  | A | <b>586.3671</b> | 569.3406        | 5 |
| 10 | 1047.5106 | 1030.4840 | <b>1075.5055</b> | 1058.4789 | Q | <b>515.3300</b> | 498.3035        | 4 |
| 11 | 1146.5790 | 1129.5524 | 1174.5739        | 1157.5473 | V | 387.2714        | <b>370.2449</b> | 3 |
| 12 | 1259.6630 | 1242.6365 | 1287.6579        | 1270.6314 | L | <b>288.2030</b> | 271.1765        | 2 |
| 13 |           |           |                  |           | R | <b>175.1190</b> | 158.0924        | 1 |

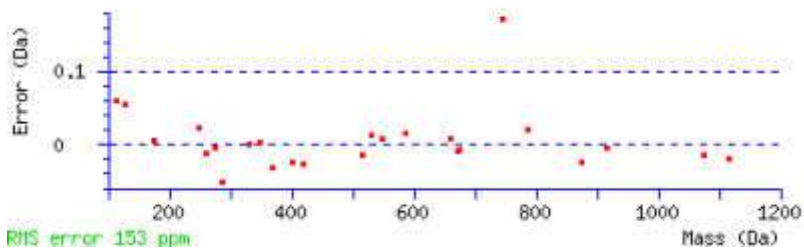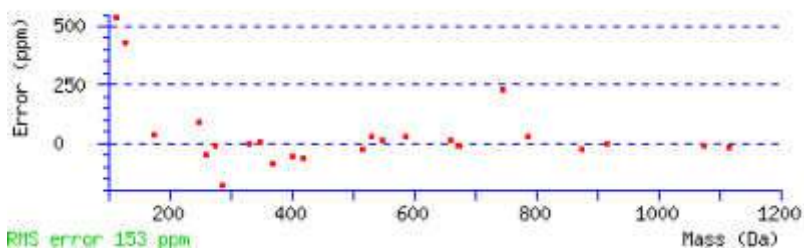

NCBI **BLAST** search of [QFAAEEISAQVLR](#)

(Parameters: blastp, nr protein database, expect=20000, no filter, PAM30)

Other BLAST [web gateways](#)

#### All matches to this query

| Score | Mr(calc)  | Delta   | Sequence                       |
|-------|-----------|---------|--------------------------------|
| 54.3  | 1460.7623 | 0.0524  | <a href="#">QFAAEEISAQVLR</a>  |
| 36.8  | 1460.7194 | 0.0953  | <a href="#">EAWCEVLRATAR</a>   |
| 29.7  | 1460.8351 | -0.0204 | <a href="#">KFAAEQISSLVLR</a>  |
| 23.7  | 1460.7405 | 0.0742  | <a href="#">MOSEEALVRAATR</a>  |
| 15.2  | 1460.7848 | 0.0299  | <a href="#">QVIPHTGGSKANPR</a> |
| 13.0  | 1460.7293 | 0.0854  | <a href="#">IDGDMKEAGQLLR</a>  |
| 11.9  | 1460.8095 | 0.0053  | <a href="#">LSLDLIMMAVLAR</a>  |
| 11.6  | 1460.7293 | 0.0854  | <a href="#">MSAINGVIEEKDR</a>  |
| 10.5  | 1460.7657 | 0.0490  | <a href="#">SLGEPISMTKQVR</a>  |
| 10.3  | 1460.6929 | 0.1218  | <a href="#">ESCIGQQEILER</a>   |

Mascot: <http://www.matrixscience.com/>

# MATRIX SCIENCE Mascot Search Results

## Peptide View Spot no 104

### MS/MS Fragmentation of **AVITVPAYFNDSQR**

Found in **gi|6746592** in **NCBI nr**, heat shock protein 70 [Arabidopsis thaliana]

Match to Query 99: 1579.854624 from(1580.861900,1+) intensity(0.0000) index(21)

Title: Label: F1, Spot\_Id: 219679, Peak\_List\_Id: 224931, MSMS Job\_Run\_Id: 21758, Comment:

Data file C:\Documents and Settings\Administrator\Desktop\farah BHU\spot set plate\Farah-Garima 11May 2013\ppw\_F1\_136842030500.txt

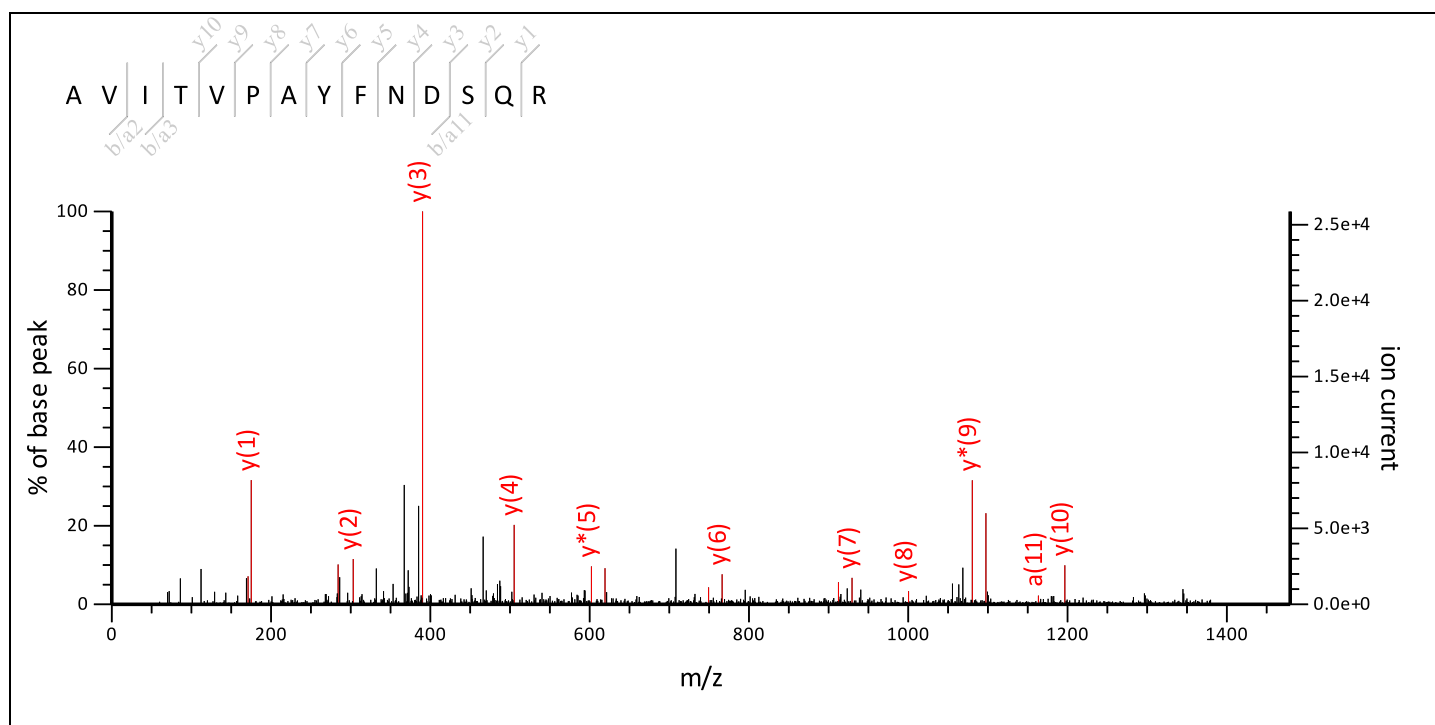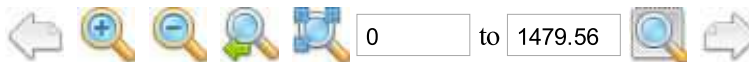

Label all possible matches  Label matches used for scoring

**Monoisotopic mass of neutral peptide Mr(calc):** 1579.7995

**Fixed modifications:** Carbamidomethyl (C) (apply to specified residues or termini only)

**Ions Score:** 70 **Expect:** 0.00018

**Matches:** 17/60 fragment ions using 28 most intense peaks ([help](#))

| # | a        | a* | b               | b* | Seq. | y                | y*               | #  |
|---|----------|----|-----------------|----|------|------------------|------------------|----|
| 1 | 44.0495  |    | 72.0444         |    | A    |                  |                  | 14 |
| 2 | 143.1179 |    | <b>171.1128</b> |    | V    | 1509.7696        | 1492.7431        | 13 |
| 3 | 256.2020 |    | <b>284.1969</b> |    | I    | 1410.7012        | 1393.6747        | 12 |
| 4 | 357.2496 |    | 385.2445        |    | T    | 1297.6171        | 1280.5906        | 11 |
| 5 | 456.3180 |    | 484.3130        |    | V    | <b>1196.5695</b> | 1179.5429        | 10 |
| 6 | 553.3708 |    | 581.3657        |    | P    | <b>1097.5010</b> | <b>1080.4745</b> | 9  |
| 7 | 624.4079 |    | 652.4028        |    | A    | <b>1000.4483</b> | 983.4217         | 8  |
| 8 | 787.4713 |    | 815.4662        |    | Y    | <b>929.4112</b>  | <b>912.3846</b>  | 7  |

|    |           |           |           |           |   |          |          |   |
|----|-----------|-----------|-----------|-----------|---|----------|----------|---|
| 9  | 934.5397  |           | 962.5346  |           | F | 766.3478 | 749.3213 | 6 |
| 10 | 1048.5826 | 1031.5560 | 1076.5775 | 1059.5510 | N | 619.2794 | 602.2529 | 5 |
| 11 | 1163.6095 | 1146.5830 | 1191.6045 | 1174.5779 | D | 505.2365 | 488.2100 | 4 |
| 12 | 1250.6416 | 1233.6150 | 1278.6365 | 1261.6099 | S | 390.2096 | 373.1830 | 3 |
| 13 | 1378.7001 | 1361.6736 | 1406.6951 | 1389.6685 | Q | 303.1775 | 286.1510 | 2 |
| 14 |           |           |           |           | R | 175.1190 | 158.0924 | 1 |

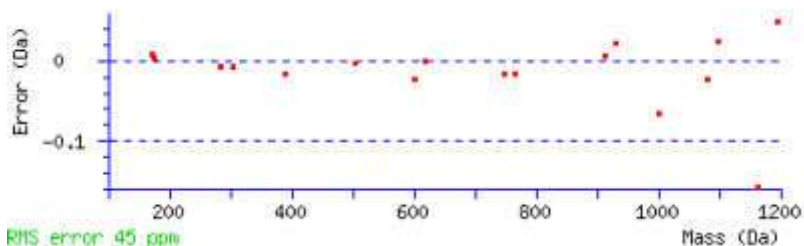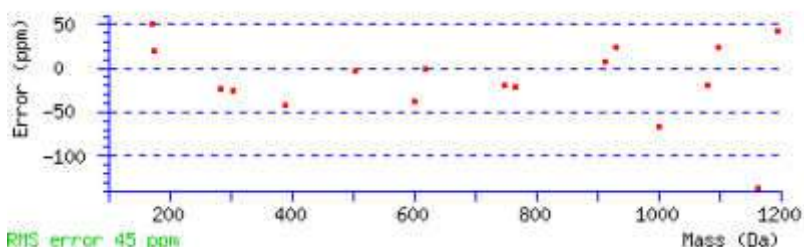

NCBI **BLAST** search of [AVITVPAYFNDSQR](#)

(Parameters: blastp, nr protein database, expect=20000, no filter, PAM30)

Other BLAST [web gateways](#)

#### All matches to this query

| Score | Mr(calc)  | Delta   | Sequence                         |
|-------|-----------|---------|----------------------------------|
| 70.1  | 1579.7995 | 0.0552  | <a href="#">AVITVPAYFNDSQR</a>   |
| 11.7  | 1579.8392 | 0.0154  | <a href="#">GITMTVGVAVFDSKR</a>  |
| 11.7  | 1579.7413 | 0.1133  | <a href="#">MGVLDGAERFDSQR</a>   |
| 11.3  | 1579.7671 | 0.0876  | <a href="#">IIYFDYINDAKR</a>     |
| 11.1  | 1579.9297 | -0.0751 | <a href="#">AVLTVPAGLGELTALR</a> |
| 9.9   | 1579.7399 | 0.1147  | <a href="#">SSKSDEIENSLPMK</a>   |
| 9.9   | 1579.8028 | 0.0518  | <a href="#">KVLDMFDNLVSQR</a>    |
| 9.7   | 1579.8206 | 0.0340  | <a href="#">VTPSSSSLGVFESKR</a>  |
| 9.5   | 1579.8318 | 0.0228  | <a href="#">VNHSDVVEVVLQSR</a>   |
| 9.3   | 1579.7876 | 0.0671  | <a href="#">MAKSGGVSSASSSLPK</a> |

Mascot: <http://www.matrixscience.com/>



# Mascot Search Results

## Peptide View Spot no 108

### MS/MS Fragmentation of **APFDLFDTR**

Found in **gi|39104468** in **NCBI**nr, heat shock protein 90 [Oryza sativa Japonica Group]

Match to Query 39: 1080.553724 from(1081.561000,1+) intensity(0.0000) index(13)

Title: Label: C2, Spot\_Id: 219692, Peak\_List\_Id: 224833, MSMS Job\_Run\_Id: 21755, Comment:

Data file C:\Documents and Settings\Administrator\Desktop\farah BHU\spot set plate\Farah-Garima 11May 2013\ppw\_C2\_136842094000.txt

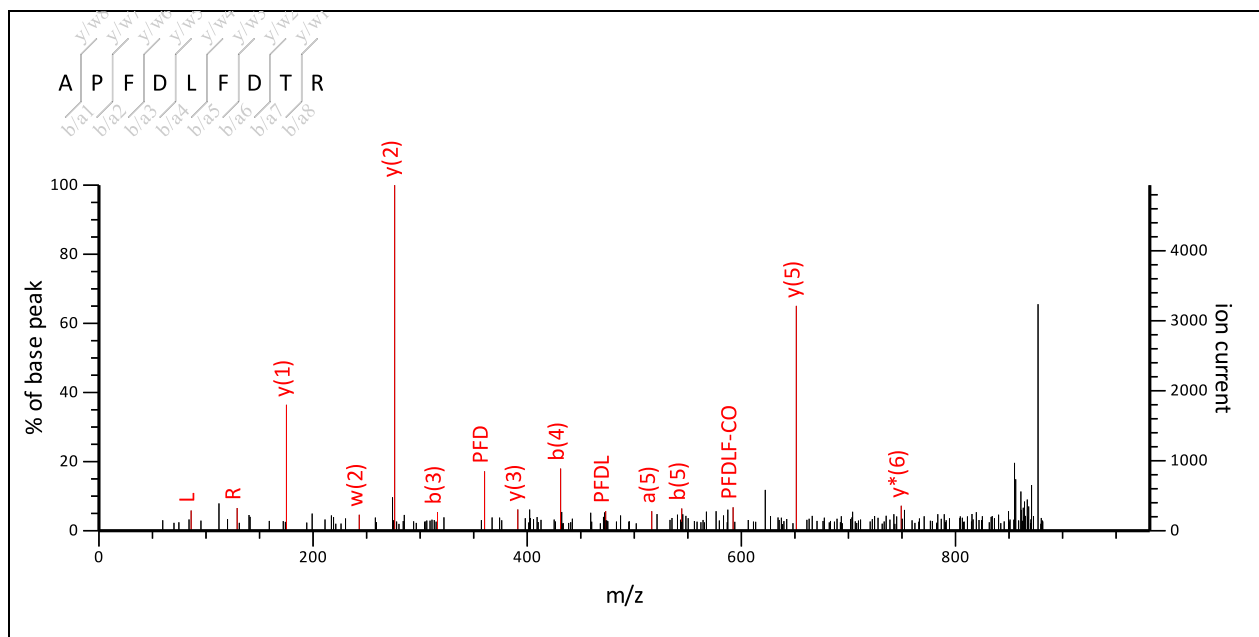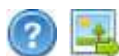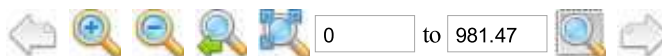

Label all possible matches  Label matches used for scoring

**Monoisotopic mass of neutral peptide Mr(calc):** 1080.5240

**Fixed modifications:** Carbamidomethyl (C) (apply to specified residues or termini only)

**Ions Score:** 21 **Expect:** 16

**Matches:** 17/116 fragment ions using 27 most intense peaks ([help](#))

| # | Immon.          | a               | a <sup>0</sup> | b               | b <sup>0</sup> | d        | d'       | Seq.     | v        | w               | w'       | y               | y*              | y <sup>0</sup> | #        |
|---|-----------------|-----------------|----------------|-----------------|----------------|----------|----------|----------|----------|-----------------|----------|-----------------|-----------------|----------------|----------|
| 1 | 44.0495         | 44.0495         |                | 72.0444         |                | 44.0495  |          | <b>A</b> |          |                 |          |                 |                 |                | <b>9</b> |
| 2 | 70.0651         | 141.1022        |                | 169.0972        |                | 115.0866 |          | <b>P</b> | 968.4472 | 967.4520        |          | 1010.4942       | 993.4676        | 992.4836       | <b>8</b> |
| 3 | 120.0808        | 288.1707        |                | <b>316.1656</b> |                |          |          | <b>F</b> | 821.3788 |                 |          | 913.4414        | 896.4149        | 895.4308       | <b>7</b> |
| 4 | 88.0393         | 403.1976        | 385.1870       | <b>431.1925</b> | 413.1819       | 359.2078 |          | <b>D</b> | 706.3519 | 705.3566        |          | 766.3730        | <b>749.3464</b> | 748.3624       | <b>6</b> |
| 5 | <b>86.0964</b>  | <b>516.2817</b> | 498.2711       | <b>544.2766</b> | 526.2660       | 474.2347 |          | <b>L</b> | 593.2678 | <b>592.2726</b> |          | <b>651.3461</b> | 634.3195        | 633.3355       | <b>5</b> |
| 6 | 120.0808        | 663.3501        | 645.3395       | 691.3450        | 673.3344       |          |          | <b>F</b> | 446.1994 |                 |          | 538.2620        | 521.2354        | 520.2514       | <b>4</b> |
| 7 | 88.0393         | 778.3770        | 760.3665       | 806.3719        | 788.3614       | 734.3872 |          | <b>D</b> | 331.1724 | 330.1772        |          | <b>391.1936</b> | 374.1670        | 373.1830       | <b>3</b> |
| 8 | 74.0600         | 879.4247        | 861.4141       | 907.4196        | 889.4090       | 863.4298 | 865.4090 | <b>T</b> | 230.1248 | <b>243.1452</b> | 245.1244 | <b>276.1666</b> | 259.1401        | 258.1561       | <b>2</b> |
| 9 | <b>129.1135</b> |                 |                |                 |                |          |          | <b>R</b> | 74.0237  | 73.0284         |          | <b>175.1190</b> | 158.0924        |                | <b>1</b> |

| Seq          | ya              | yb       | Seq          | ya       | yb              | Seq         | ya       | yb              |
|--------------|-----------------|----------|--------------|----------|-----------------|-------------|----------|-----------------|
| <b>PF</b>    | 217.1335        | 245.1285 | <b>PFD</b>   | 332.1605 | <b>360.1554</b> | <b>PFDL</b> | 445.2445 | <b>473.2395</b> |
| <b>PFDLF</b> | <b>592.3130</b> | 620.3079 | <b>FD</b>    | 235.1077 | 263.1026        | <b>FDL</b>  | 348.1918 | 376.1867        |
| <b>FDLF</b>  | 495.2602        | 523.2551 | <b>FDLFD</b> | 610.2871 | 638.2821        | <b>DL</b>   | 201.1234 | 229.1183        |

|            |          |          |             |          |          |              |          |                 |
|------------|----------|----------|-------------|----------|----------|--------------|----------|-----------------|
| <b>DLF</b> | 348.1918 | 376.1867 | <b>DLFD</b> | 463.2187 | 491.2136 | <b>DLFDT</b> | 564.2664 | <b>592.2613</b> |
| <b>LF</b>  | 233.1648 | 261.1598 | <b>LFD</b>  | 348.1918 | 376.1867 | <b>LFDT</b>  | 449.2395 | 477.2344        |
| <b>FD</b>  | 235.1077 | 263.1026 | <b>FDT</b>  | 336.1554 | 364.1503 | <b>DT</b>    | 189.0870 | 217.0819        |

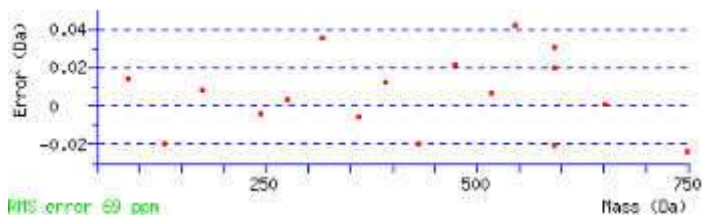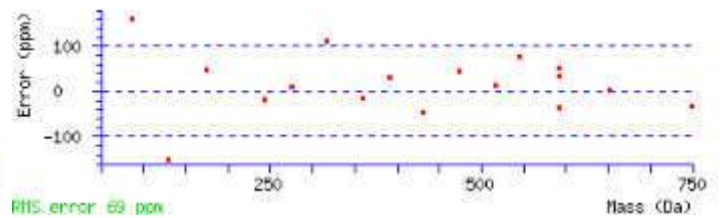

NCBI **BLAST** search of [APFDLFDTR](#)

(Parameters: blastp, nr protein database, expect=20000, no filter, PAM30)

Other BLAST [web gateways](#)

#### All matches to this query

| Score | Mr(calc)  | Delta   | Sequence                    |
|-------|-----------|---------|-----------------------------|
| 21.0  | 1080.5240 | 0.0297  | <a href="#">APFDLFDTR</a>   |
| 15.0  | 1080.5386 | 0.0151  | <a href="#">LLGFCTGGTR</a>  |
| 15.0  | 1080.5096 | 0.0441  | <a href="#">LMWIDMTR</a>    |
| 15.0  | 1080.5386 | 0.0151  | <a href="#">MATYALQQR</a>   |
| 14.7  | 1080.5234 | 0.0304  | <a href="#">MAVAATGSTTR</a> |
| 13.8  | 1080.4870 | 0.0668  | <a href="#">ETSINMNTR</a>   |
| 13.7  | 1080.5056 | 0.0481  | <a href="#">DMKMIQQR</a>    |
| 13.7  | 1080.5200 | 0.0337  | <a href="#">EDTSSLQQR</a>   |
| 12.6  | 1080.6403 | -0.0866 | <a href="#">QALKPAIQGR</a>  |
| 12.0  | 1080.5274 | 0.0263  | <a href="#">GLMLYPDTR</a>   |

Mascot: <http://www.matrixscience.com/>



**MATRIX SCIENCE Mascot Search Results**

**Peptide View Spot no 108**

MS/MS Fragmentation of **RAPFDLFDTR**

Found in **gi39104468** in **NCBI nr**, heat shock protein 90 [Oryza sativa Japonica Group]

Match to Query 55: 1236.646424 from(1237.653700,1+) intensity(0.0000) index(17)

Title: Label: C2, Spot\_Id: 219692, Peak\_List\_Id: 224827, MSMS Job\_Run\_Id: 21755, Comment:

Data file C:\Documents and Settings\Administrator\Desktop\farah BHU\spot set plate\Farah-Garima 11May 2013\ppw\_C2\_136842094000.txt

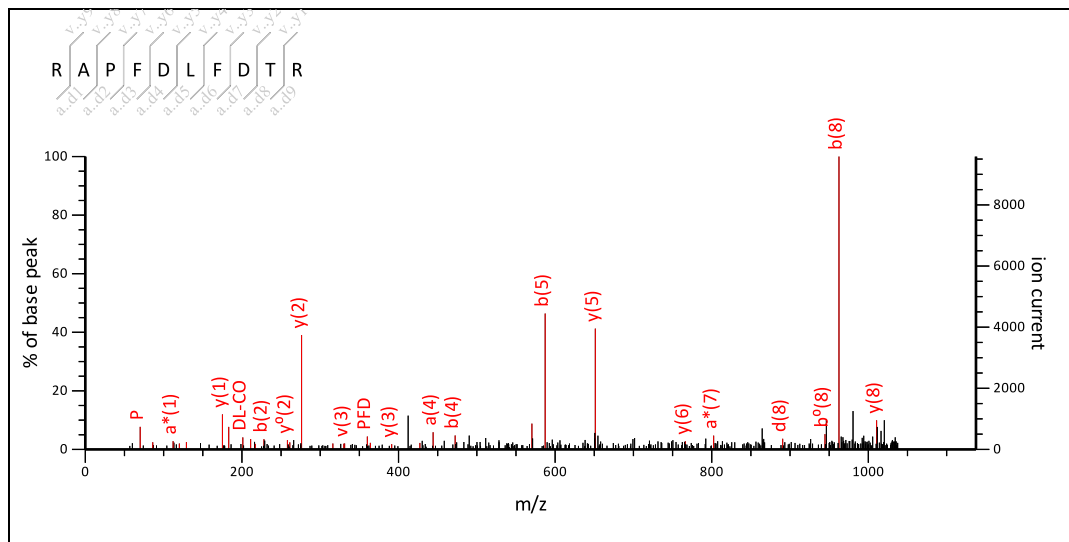

Navigation icons: Home, Back, Forward, Search, Print, etc. Range: 0 to 1137.47

Label all possible matches  Label matches used for scoring

Monoisotopic mass of neutral peptide Mr(calc): 1236.6251

Fixed modifications: Carbamidomethyl (C) (apply to specified residues or termini only)

Ions Score: 19 Expect: 27

Matches : 37/151 fragment ions using 80 most intense peaks (help)

| #  | Immon.   | a         | a*        | a <sup>0</sup> | b         | b*        | b <sup>0</sup> | d         | d'        | Seq. | v         | w        | w'       | y         | y*        |
|----|----------|-----------|-----------|----------------|-----------|-----------|----------------|-----------|-----------|------|-----------|----------|----------|-----------|-----------|
| 1  | 129.1135 | 129.1135  | 112.0869  |                | 157.1084  | 140.0818  |                | 44.0495   |           | R    |           |          |          |           |           |
| 2  | 44.0495  | 200.1506  | 183.1240  |                | 228.1455  | 211.1190  |                |           |           | A    | 1065.5000 |          |          | 1081.5313 | 1064.5047 |
| 3  | 70.0651  | 297.2034  | 280.1768  |                | 325.1983  | 308.1717  |                | 271.1877  |           | P    | 968.4472  | 967.4520 |          | 1010.4942 | 993.4676  |
| 4  | 120.0808 | 444.2718  | 427.2452  |                | 472.2667  | 455.2401  |                |           |           | F    | 821.3788  |          |          | 913.4414  | 896.4149  |
| 5  | 88.0393  | 559.2987  | 542.2722  | 541.2881       | 587.2936  | 570.2671  | 569.2831       | 515.3089  |           | D    | 706.3519  | 705.3566 |          | 766.3730  | 749.3464  |
| 6  | 86.0964  | 672.3828  | 655.3562  | 654.3722       | 700.3777  | 683.3511  | 682.3671       | 630.3358  |           | L    | 593.2678  | 592.2726 |          | 651.3461  | 634.3195  |
| 7  | 120.0808 | 819.4512  | 802.4246  | 801.4406       | 847.4461  | 830.4196  | 829.4355       |           |           | F    | 446.1994  |          |          | 538.2620  | 521.2354  |
| 8  | 88.0393  | 934.4781  | 917.4516  | 916.4676       | 962.4730  | 945.4465  | 944.4625       | 890.4883  |           | D    | 331.1724  | 330.1772 |          | 391.1936  | 374.1670  |
| 9  | 74.0600  | 1035.5258 | 1018.4993 | 1017.5152      | 1063.5207 | 1046.4942 | 1045.5102      | 1019.5309 | 1021.5102 | T    | 230.1248  | 243.1452 | 245.1244 | 276.1666  | 259.1401  |
| 10 | 129.1135 |           |           |                |           |           |                |           |           | R    | 74.0237   | 73.0284  |          | 175.1190  | 158.0924  |

| Seq   | ya       | yb       | Seq    | ya       | yb       | Seq   | ya       | yb       |
|-------|----------|----------|--------|----------|----------|-------|----------|----------|
| AP    | 141.1022 | 169.0972 | APF    | 288.1707 | 316.1656 | APFD  | 403.1976 | 431.1925 |
| APFDL | 516.2817 | 544.2766 | APFDLF | 663.3501 | 691.3450 | PF    | 217.1335 | 245.1285 |
| PFD   | 332.1605 | 360.1554 | PFDL   | 445.2445 | 473.2395 | PFDLF | 592.3130 | 620.3079 |
| FD    | 235.1077 | 263.1026 | FDL    | 348.1918 | 376.1867 | FDLF  | 495.2602 | 523.2551 |
| FDLFD | 610.2871 | 638.2821 | DL     | 201.1234 | 229.1183 | DLF   | 348.1918 | 376.1867 |
| DLFD  | 463.2187 | 491.2136 | DLFDT  | 564.2664 | 592.2613 | LF    | 233.1648 | 261.1598 |
| LFD   | 348.1918 | 376.1867 | LFDT   | 449.2395 | 477.2344 | FD    | 235.1077 | 263.1026 |
| FDT   | 336.1554 | 364.1503 | DT     | 189.0870 | 217.0819 |       |          |          |

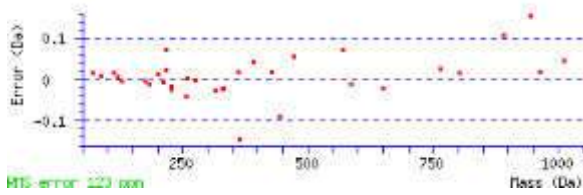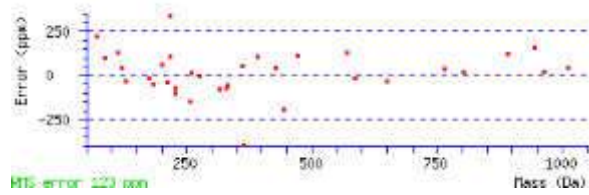

NCBI **BLAST** search of [RAPFDLFDTR](#)

(Parameters: blastp, nr protein database, expect=20000, no filter, PAM30)

Other BLAST [web gateways](#)

**All matches to this query**

| Score | Mr(calc)  | Delta   | Sequence                       |
|-------|-----------|---------|--------------------------------|
| 27.9  | 1236.6132 | 0.0332  | <a href="#">SMGSGVGGEK ITR</a> |
| 19.5  | 1236.6251 | 0.0213  | <a href="#">RAPFDLFDTR</a>     |
| 17.2  | 1236.6067 | 0.0397  | <a href="#">MSTRKPTCTR</a>     |
| 16.2  | 1236.5907 | 0.0557  | <a href="#">KVTEEDMLEK</a>     |
| 16.0  | 1236.7190 | -0.0726 | <a href="#">KVLVPPSGPSTR</a>   |
| 16.0  | 1236.6132 | 0.0332  | <a href="#">SMGSVGGEK ITR</a>  |
| 16.0  | 1236.5470 | 0.0995  | <a href="#">SSTATADAEQEK</a>   |
| 15.7  | 1236.5366 | 0.1098  | <a href="#">NLPMDLMDEK</a>     |
| 15.4  | 1236.5622 | 0.0842  | <a href="#">NNTGLDEFAEK</a>    |
| 15.2  | 1236.7303 | -0.0838 | <a href="#">VGV RAPATPLTR</a>  |

Mascot: <http://www.matrixscience.com/>


**Mascot Search Results**
**Peptide View**      **Spot no 108**
**MS/MS Fragmentation of SDLVNNLGTIAR**

 Found in **gi39104468** in **NCBIInr**, heat shock protein 90 [Oryza sativa Japonica Group]

Match to Query 60: 1271.722724 from(1272.730000,1+) intensity(0.0000) index(18)

Title: Label: C2, Spot\_Id: 219692, Peak\_List\_Id: 224835, MSMS Job\_Run\_Id: 21755, Comment:

Data file C:\Documents and Settings\Administrator\Desktop\farah BHU\spot set plate\Farah-Garima 11May 2013\ppw\_C2\_136842094000.txt

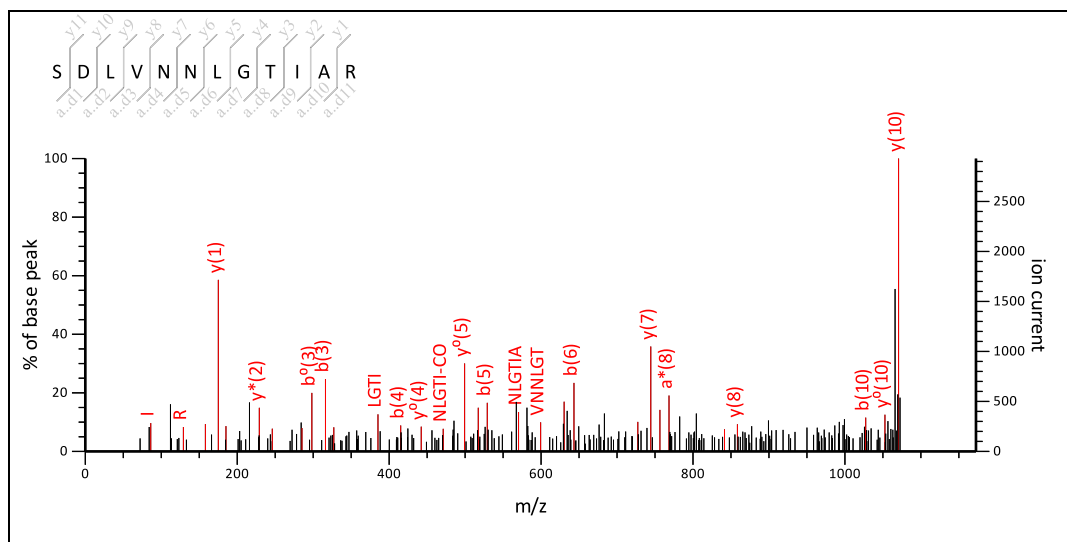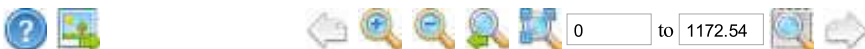
 Label all possible matches     Label matches used for scoring 
**Monoisotopic mass of neutral peptide Mr(calc):** 1271.6834

**Fixed modifications:** Carbamidomethyl (C) (apply to specified residues or termini only)

**Ions Score:** 39    **Expect:** 0.22

**Matches:** 43/207 fragment ions using 51 most intense peaks ([help](#))

| #  | Immon.          | a                | a*              | a <sup>0</sup>   | b                | b*        | b <sup>0</sup>  | d               | d'       | Seq. | v         | w         | w'       | y                | y*              | y            |
|----|-----------------|------------------|-----------------|------------------|------------------|-----------|-----------------|-----------------|----------|------|-----------|-----------|----------|------------------|-----------------|--------------|
| 1  | 60.0444         | 60.0444          |                 | 42.0338          | 88.0393          |           | 70.0287         | 44.0495         |          | S    |           |           |          |                  |                 |              |
| 2  | 88.0393         | <b>175.0713</b>  |                 | 157.0608         | 203.0662         |           | <b>185.0557</b> | 131.0815        |          | D    | 1125.6375 | 1124.6422 |          | 1185.6586        | 1168.6321       | 1167.        |
| 3  | <b>86.0964</b>  | 288.1554         |                 | 270.1448         | <b>316.1503</b>  |           | <b>298.1397</b> | <b>246.1084</b> |          | L    | 1012.5534 | 1011.5582 |          | <b>1070.6317</b> | 1053.6051       | <b>1052.</b> |
| 4  | 72.0808         | 387.2238         |                 | 369.2132         | <b>415.2187</b>  |           | 397.2082        | 373.2082        |          | V    | 913.4850  | 926.5054  |          | 957.5476         | 940.5211        | 939.         |
| 5  | 87.0553         | 501.2667         | 484.2402        | 483.2562         | <b>529.2617</b>  | 512.2351  | 511.2511        | 458.2609        |          | N    | 799.4421  | 798.4468  |          | <b>858.4792</b>  | <b>841.4526</b> | 840.         |
| 6  | 87.0553         | 615.3097         | 598.2831        | 597.2991         | <b>643.3046</b>  | 626.2780  | 625.2940        | 572.3039        |          | N    | 685.3992  | 684.4039  |          | <b>744.4363</b>  | <b>727.4097</b> | 726.         |
| 7  | <b>86.0964</b>  | 728.3937         | 711.3672        | 710.3832         | <b>756.3886</b>  | 739.3621  | 738.3781        | 686.3468        |          | L    | 572.3151  | 571.3198  |          | <b>630.3933</b>  | 613.3668        | 612.         |
| 8  | 30.0338         | 785.4152         | <b>768.3886</b> | 767.4046         | 813.4101         | 796.3836  | 795.3995        |                 |          | G    |           |           |          | <b>517.3093</b>  | 500.2827        | <b>499.</b>  |
| 9  | 74.0600         | 886.4629         | 869.4363        | 868.4523         | 914.4578         | 897.4312  | 896.4472        | 870.4680        | 872.4472 | T    | 414.2459  | 427.2663  | 429.2456 | 460.2878         | 443.2613        | <b>442.</b>  |
| 10 | <b>86.0964</b>  | 999.5469         | 982.5204        | 981.5364         | <b>1027.5419</b> | 1010.5153 | 1009.5313       | 971.5156        | 985.5313 | I    | 301.1619  | 314.1823  | 328.1979 | 359.2401         | 342.2136        |              |
| 11 | 44.0495         | <b>1070.5840</b> | 1053.5575       | <b>1052.5735</b> | 1098.5790        | 1081.5524 | 1080.5684       |                 |          | A    | 230.1248  |           |          | <b>246.1561</b>  | <b>229.1295</b> |              |
| 12 | <b>129.1135</b> |                  |                 |                  |                  |           |                 |                 |          | R    | 74.0237   | 73.0284   |          | <b>175.1190</b>  | <b>158.0924</b> |              |

| Seq   | ya              | yb              | Seq    | ya       | yb              | Seq     | ya       | yb              |
|-------|-----------------|-----------------|--------|----------|-----------------|---------|----------|-----------------|
| DL    | 201.1234        | <b>229.1183</b> | DLV    | 300.1918 | 328.1867        | DLVN    | 414.2347 | <b>442.2296</b> |
| DLVNN | 528.2776        | 556.2726        | DLVNNL | 641.3617 | 669.3566        | DLVNNLG | 698.3832 | 726.3781        |
| LV    | <b>185.1648</b> | 213.1598        | LVN    | 299.2078 | <b>327.2027</b> | LVNN    | 413.2507 | 441.2456        |
| LVNNL | 526.3348        | 554.3297        | LVNNLG | 583.3562 | 611.3511        | LVNNLGT | 684.4039 | 712.3988        |
| VN    | 186.1237        | 214.1186        | VNN    | 300.1666 | 328.1615        | VNNL    | 413.2507 | 441.2456        |
| VNNLG | 470.2722        | 498.2671        | VNNLGT | 571.3198 | <b>599.3148</b> | VNNLGTI | 684.4039 | 712.3988        |
| NN    | 201.0982        | <b>229.0931</b> | NNL    | 314.1823 | 342.1772        | NNLG    | 371.2037 | 399.1987        |
| NNLGT | 472.2514        | 500.2463        | NNLGTI | 585.3355 | 613.3304        | NNLGTIA | 656.3726 | 684.3675        |
| NL    | 200.1394        | 228.1343        | NLG    | 257.1608 | <b>285.1557</b> | NLGT    | 358.2085 | 386.2034        |

|              |          |          |               |          |          |              |          |          |
|--------------|----------|----------|---------------|----------|----------|--------------|----------|----------|
| <b>NLGTI</b> | 471.2926 | 499.2875 | <b>NLGTIA</b> | 542.3297 | 570.3246 | <b>LG</b>    | 143.1179 | 171.1128 |
| <b>LGT</b>   | 244.1656 | 272.1605 | <b>LGTI</b>   | 357.2496 | 385.2445 | <b>LGTIA</b> | 428.2867 | 456.2817 |
| <b>GT</b>    | 131.0815 | 159.0764 | <b>GTI</b>    | 244.1656 | 272.1605 | <b>GTIA</b>  | 315.2027 | 343.1976 |
| <b>TI</b>    | 187.1441 | 215.1390 | <b>TIA</b>    | 258.1812 | 286.1761 | <b>IA</b>    | 157.1335 | 185.1285 |

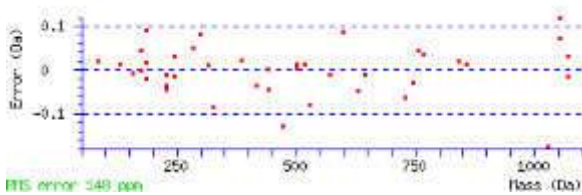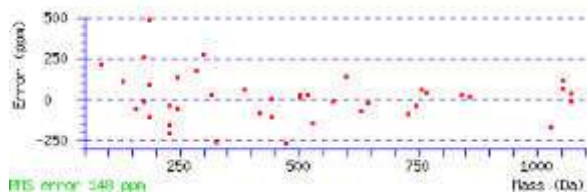

NCBI BLAST search of [SDLVNNLGTIAR](#)

(Parameters: blastp, nr protein database, expect=20000, no filter, PAM30)

Other BLAST [web gateways](#)

#### All matches to this query

| Score | Mr(calc)  | Delta  | Sequence                      |
|-------|-----------|--------|-------------------------------|
| 39.1  | 1271.6834 | 0.0394 | <a href="#">SDLVNNLGTIAR</a>  |
| 30.3  | 1271.6834 | 0.0394 | <a href="#">SDLVNNLATIGR</a>  |
| 28.2  | 1271.6470 | 0.0758 | <a href="#">QLIDSNTPAASR</a>  |
| 26.2  | 1271.7020 | 0.0207 | <a href="#">VSIAVGMPKGSAR</a> |
| 24.5  | 1271.7085 | 0.0142 | <a href="#">ITLPETLIGTAR</a>  |
| 21.7  | 1271.6833 | 0.0394 | <a href="#">ITPLAEANTKAR</a>  |
| 21.5  | 1271.6292 | 0.0935 | <a href="#">MADPGASVNIAR</a>  |
| 20.4  | 1271.6833 | 0.0394 | <a href="#">IAAATAAEFAKAR</a> |
| 19.9  | 1271.7197 | 0.0030 | <a href="#">LAAEVSSQIKAR</a>  |
| 18.4  | 1271.6833 | 0.0394 | <a href="#">IVAEELERSAR</a>   |

Mascot: <http://www.matrixscience.com/>

**MATRIX SCIENCE Mascot Search Results**

**Peptide View Spot no 108**

MS/MS Fragmentation of **GIVDSEDLPLNISR**

Found in **gi39104468** in **NCBI**nr, heat shock protein 90 [Oryza sativa Japonica Group]

Match to Query 80: 1526.843524 from(1527.850800,1+) intensity(0.0000) index(25)

Title: Label: C2, Spot\_Id: 219692, Peak\_List\_Id: 224828, MSMS Job\_Run\_Id: 21755, Comment:

Data file C:\Documents and Settings\Administrator\Desktop\farah BHU\spot set plate\Farah-Garima 11May 2013\ppw\_C2\_136842094000.txt

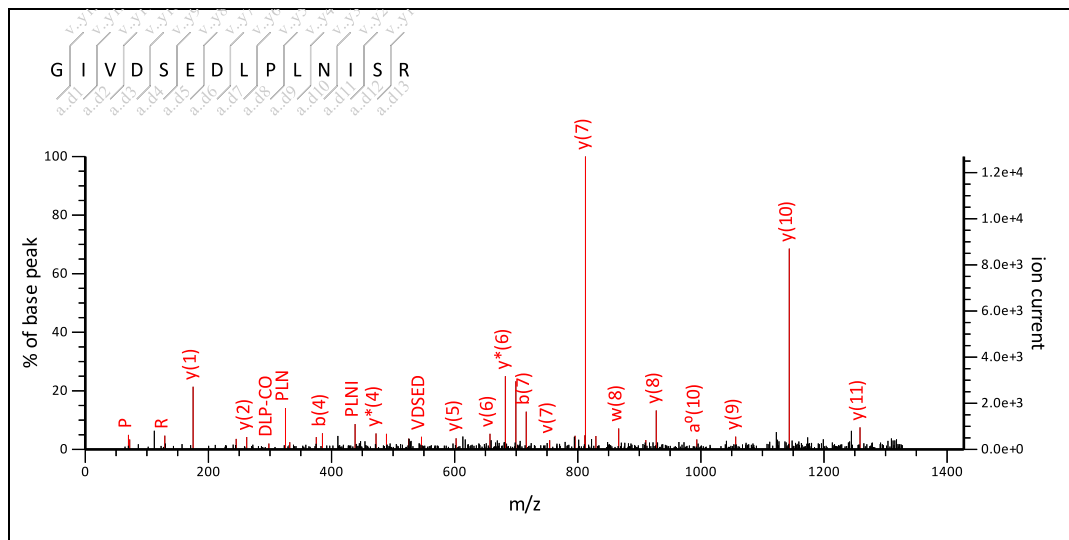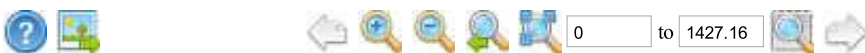

Label all possible matches  Label matches used for scoring

Monoisotopic mass of neutral peptide Mr(calc): 1526.7940

Fixed modifications: Carbamidomethyl (C) (apply to specified residues or termini only)

Ions Score: 81 Expect: 1.3e-05

Matches : 44/237 fragment ions using 52 most intense peaks [\(help\)](#)

| #  | Immon.   | a         | a*        | a <sup>0</sup> | b         | b*        | b <sup>0</sup> | d         | d'        | Seq.     | v         | w         | w'        | y         | y*        |
|----|----------|-----------|-----------|----------------|-----------|-----------|----------------|-----------|-----------|----------|-----------|-----------|-----------|-----------|-----------|
| 1  | 30.0338  | 30.0338   |           |                | 58.0287   |           |                | 44.0495   |           | <b>G</b> |           |           |           |           |           |
| 2  | 86.0964  | 143.1179  |           |                | 171.1128  |           |                | 115.0866  | 129.1022  | <b>I</b> | 1412.7016 | 1425.7220 | 1439.7376 | 1470.7798 | 1453.7533 |
| 3  | 72.0808  | 242.1863  |           |                | 270.1812  |           |                | 228.1707  |           | <b>V</b> | 1313.6332 | 1326.6536 |           | 1357.6958 | 1340.6692 |
| 4  | 88.0393  | 357.2132  |           | 339.2027       | 385.2082  |           | 367.1976       | 313.2234  |           | <b>D</b> | 1198.6062 | 1197.6110 |           | 1258.6274 | 1241.6008 |
| 5  | 60.0444  | 444.2453  |           | 426.2347       | 472.2402  |           | 454.2296       | 428.2504  |           | <b>S</b> | 1111.5742 | 1110.5790 |           | 1143.6004 | 1126.5739 |
| 6  | 102.0550 | 573.2879  |           | 555.2773       | 601.2828  |           | 583.2722       | 515.2824  |           | <b>E</b> | 982.5316  | 981.5364  |           | 1056.5684 | 1039.5419 |
| 7  | 88.0393  | 688.3148  |           | 670.3042       | 716.3097  |           | 698.2992       | 644.3250  |           | <b>D</b> | 867.5047  | 866.5094  |           | 927.5258  | 910.4993  |
| 8  | 86.0964  | 801.3989  |           | 783.3883       | 829.3938  |           | 811.3832       | 759.3519  |           | <b>L</b> | 754.4206  | 753.4254  |           | 812.4989  | 795.4723  |
| 9  | 70.0651  | 898.4516  |           | 880.4411       | 926.4466  |           | 908.4360       | 872.4360  |           | <b>P</b> | 657.3678  | 656.3726  |           | 699.4148  | 682.3882  |
| 10 | 86.0964  | 1011.5357 |           | 993.5251       | 1039.5306 |           | 1021.5201      | 969.4888  |           | <b>L</b> | 544.2838  | 543.2885  |           | 602.3620  | 585.3355  |
| 11 | 87.0553  | 1125.5786 | 1108.5521 | 1107.5681      | 1153.5735 | 1136.5470 | 1135.5630      | 1082.5728 |           | <b>N</b> | 430.2409  | 429.2456  |           | 489.2780  | 472.2514  |
| 12 | 86.0964  | 1238.6627 | 1221.6361 | 1220.6521      | 1266.6576 | 1249.6311 | 1248.6470      | 1210.6314 | 1224.6470 | <b>I</b> | 317.1568  | 330.1772  | 344.1928  | 375.2350  | 358.2085  |
| 13 | 60.0444  | 1325.6947 | 1308.6682 | 1307.6842      | 1353.6896 | 1336.6631 | 1335.6791      | 1309.6998 |           | <b>S</b> | 230.1248  | 229.1295  |           | 262.1510  | 245.1244  |
| 14 | 129.1135 |           |           |                |           |           |                |           |           | <b>R</b> | 74.0237   | 73.0284   |           | 175.1190  | 158.0924  |

| Seq           | ya       | yb       | Seq           | ya       | yb       | Seq            | ya       | yb       |
|---------------|----------|----------|---------------|----------|----------|----------------|----------|----------|
| <b>IV</b>     | 185.1648 | 213.1598 | <b>IVD</b>    | 300.1918 | 328.1867 | <b>IVDS</b>    | 387.2238 | 415.2187 |
| <b>IVDSE</b>  | 516.2664 | 544.2613 | <b>IVDSED</b> | 631.2933 | 659.2883 | <b>VD</b>      | 187.1077 | 215.1026 |
| <b>VDS</b>    | 274.1397 | 302.1347 | <b>VDSE</b>   | 403.1823 | 431.1773 | <b>VDSED</b>   | 518.2093 | 546.2042 |
| <b>VDSEDL</b> | 631.2933 | 659.2883 | <b>DS</b>     | 175.0713 | 203.0662 | <b>DSE</b>     | 304.1139 | 332.1088 |
| <b>DSED</b>   | 419.1409 | 447.1358 | <b>DSEDL</b>  | 532.2249 | 560.2198 | <b>DSEDLPL</b> | 629.2777 | 657.2726 |
| <b>SE</b>     | 189.0870 | 217.0819 | <b>SED</b>    | 304.1139 | 332.1088 | <b>SEDL</b>    | 417.1980 | 445.1929 |
| <b>SEDLPL</b> | 514.2508 | 542.2457 | <b>SEDLPL</b> | 627.3348 | 655.3297 | <b>ED</b>      | 217.0819 | 245.0768 |

|                        |          |                 |                        |                 |                 |                        |                 |                 |
|------------------------|----------|-----------------|------------------------|-----------------|-----------------|------------------------|-----------------|-----------------|
| <a href="#">EDL</a>    | 330.1660 | 358.1609        | <a href="#">EDLP</a>   | 427.2187        | 455.2136        | <a href="#">EDLPL</a>  | 540.3028        | 568.2977        |
| <a href="#">EDLPLN</a> | 654.3457 | <b>682.3406</b> | <a href="#">DL</a>     | 201.1234        | 229.1183        | <a href="#">DLP</a>    | <b>298.1761</b> | 326.1710        |
| <a href="#">DLPL</a>   | 411.2602 | 439.2551        | <a href="#">DLPLN</a>  | <b>525.3031</b> | 553.2980        | <a href="#">DLPLNI</a> | 638.3872        | 666.3821        |
| <a href="#">LP</a>     | 183.1492 | 211.1441        | <a href="#">LPL</a>    | 296.2333        | 324.2282        | <a href="#">LPLN</a>   | <b>410.2762</b> | <b>438.2711</b> |
| <a href="#">LPLNI</a>  | 523.3602 | 551.3552        | <a href="#">LPLNIS</a> | 610.3923        | 638.3872        | <a href="#">PL</a>     | 183.1492        | 211.1441        |
| <a href="#">PLN</a>    | 297.1921 | <b>325.1870</b> | <a href="#">PLNI</a>   | <b>410.2762</b> | <b>438.2711</b> | <a href="#">PLNIS</a>  | 497.3082        | <b>525.3031</b> |
| <a href="#">LN</a>     | 200.1394 | 228.1343        | <a href="#">LNI</a>    | 313.2234        | 341.2183        | <a href="#">LNIS</a>   | 400.2554        | 428.2504        |
| <a href="#">NI</a>     | 200.1394 | 228.1343        | <a href="#">NIS</a>    | 287.1714        | 315.1663        | <a href="#">IS</a>     | 173.1285        | 201.1234        |

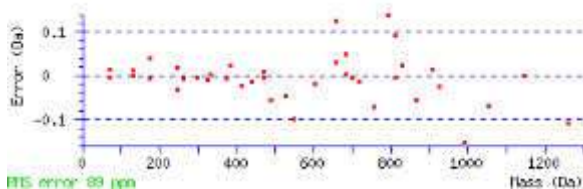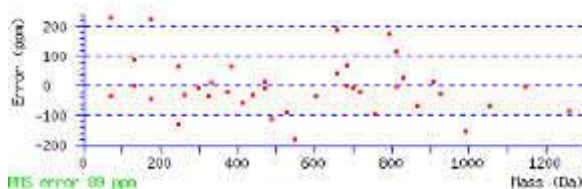

NCBI BLAST search of [GIVDSEDLPLNISR](#)

(Parameters: blastp, nr protein database, expect=20000, no filter, PAM30)

Other BLAST [web gateways](#)

#### All matches to this query

| Score | Mr(calc)  | Delta   | Sequence                       |
|-------|-----------|---------|--------------------------------|
| 81.2  | 1526.7940 | 0.0495  | <a href="#">GIVDSEDLPLNISR</a> |
| 25.5  | 1526.8052 | 0.0383  | <a href="#">DRISNLPDELISR</a>  |
| 22.8  | 1526.8973 | -0.0538 | <a href="#">FVPKVQLPFSPLR</a>  |
| 21.3  | 1526.8239 | 0.0196  | <a href="#">QMALQQLVAGSPLR</a> |
| 19.8  | 1526.8205 | 0.0230  | <a href="#">NPFNENLPVKISR</a>  |
| 15.6  | 1526.8165 | 0.0270  | <a href="#">RNSAGETLSVQIPR</a> |
| 15.3  | 1526.8165 | 0.0271  | <a href="#">IRAAESALNLEOGR</a> |
| 15.0  | 1526.7664 | 0.0772  | <a href="#">AVVDSNMVHHYK</a>   |
| 14.1  | 1526.7073 | 0.1362  | <a href="#">NRNDTSTYSNISR</a>  |
| 13.7  | 1526.7913 | 0.0522  | <a href="#">TVSSPRNSSSPRPR</a> |

Mascot: <http://www.matrixscience.com/>

**MATRIX SCIENCE Mascot Search Results**

**Peptide View Spot no 108**

MS/MS Fragmentation of **SGDELTSLKDYVTR**

Found in **gi39104468** in **NCBIInr**, heat shock protein 90 [Oryza sativa Japonica Group]

Match to Query 88: 1582.835724 from(1583.843000,1+) intensity(0.0000) index(28)

Title: Label: C2, Spot\_Id: 219692, Peak\_List\_Id: 224832, MSMS Job\_Run\_Id: 21755, Comment:

Data file C:\Documents and Settings\Administrator\Desktop\farah BHU\spot set plate\Farah-Garima 11May 2013\ppw\_C2\_136842094000.txt

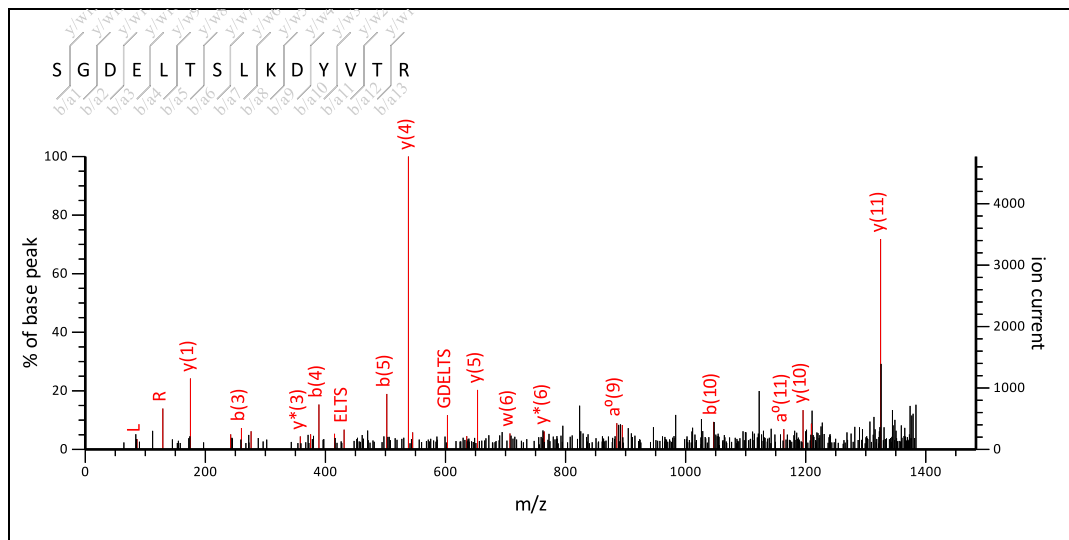

Navigation icons: Home, Back, Forward, Search, Print, etc. Range: 0 to 1483.7

Label all possible matches  Label matches used for scoring

Monoisotopic mass of neutral peptide Mr(calc): 1582.7839

Fixed modifications: Carbamidomethyl (C) (apply to specified residues or termini only)

Ions Score: 35 Expect: 0.6

Matches : 33/240 fragment ions using 56 most intense peaks (help)

| #  | Immon.          | a         | a*        | a <sup>0</sup>   | b                | b*        | b <sup>0</sup>  | d         | d'        | Seq. | v         | w               | w'        | y                | y*              |
|----|-----------------|-----------|-----------|------------------|------------------|-----------|-----------------|-----------|-----------|------|-----------|-----------------|-----------|------------------|-----------------|
| 1  | 60.0444         | 60.0444   |           | 42.0338          | 88.0393          |           | 70.0287         | 44.0495   |           | S    |           |                 |           |                  |                 |
| 2  | 30.0338         | 117.0659  |           | 99.0553          | 145.0608         |           | 127.0502        |           |           | G    |           |                 |           | 1496.7591        | 1479.7326       |
| 3  | 88.0393         | 232.0928  |           | 214.0822         | <b>260.0877</b>  |           | <b>242.0771</b> | 188.1030  |           | D    | 1379.7165 | 1378.7213       |           | 1439.7377        | 1422.7111       |
| 4  | 102.0550        | 361.1354  |           | 343.1248         | <b>389.1303</b>  |           | 371.1197        | 303.1299  |           | E    | 1250.6739 | 1249.6787       |           | <b>1324.7107</b> | 1307.6842       |
| 5  | <b>86.0964</b>  | 474.2195  |           | 456.2089         | <b>502.2144</b>  |           | 484.2038        | 432.1725  |           | L    | 1137.5899 | 1136.5946       |           | <b>1195.6681</b> | 1178.6416       |
| 6  | 74.0600         | 575.2671  |           | 557.2566         | <b>603.2620</b>  |           | 585.2515        | 559.2722  | 561.2515  | T    | 1036.5422 | 1049.5626       | 1051.5419 | 1082.5841        | 1065.5575       |
| 7  | 60.0444         | 662.2992  |           | 644.2886         | 690.2941         |           | 672.2835        | 646.3042  |           | S    | 949.5102  | 948.5149        |           | 981.5364         | 964.5098        |
| 8  | <b>86.0964</b>  | 775.3832  |           | 757.3727         | 803.3781         |           | 785.3676        | 733.3363  |           | L    | 836.4261  | 835.4308        |           | <b>894.5043</b>  | 877.4778        |
| 9  | 101.1073        | 903.4782  | 886.4516  | <b>885.4676</b>  | 931.4731         | 914.4466  | 913.4625        | 846.4203  |           | K    | 708.3311  | <b>707.3359</b> |           | 781.4203         | <b>764.3937</b> |
| 10 | 88.0393         | 1018.5051 | 1001.4786 | 1000.4946        | <b>1046.5000</b> | 1029.4735 | 1028.4895       | 974.5153  |           | D    | 593.3042  | 592.3089        |           | <b>653.3253</b>  | 636.2988        |
| 11 | 136.0757        | 1181.5685 | 1164.5419 | <b>1163.5579</b> | <b>1209.5634</b> | 1192.5368 | 1191.5528       |           |           | Y    | 430.2409  |                 |           | <b>538.2984</b>  | 521.2718        |
| 12 | 72.0808         | 1280.6369 | 1263.6103 | 1262.6263        | 1308.6318        | 1291.6052 | 1290.6212       | 1266.6212 |           | V    | 331.1724  | 344.1928        |           | <b>375.2350</b>  | <b>358.2085</b> |
| 13 | 74.0600         | 1381.6846 | 1364.6580 | 1363.6740        | 1409.6795        | 1392.6529 | 1391.6689       | 1365.6896 | 1367.6689 | T    | 230.1248  | 243.1452        | 245.1244  | <b>276.1666</b>  | 259.1401        |
| 14 | <b>129.1135</b> |           |           |                  |                  |           |                 |           |           | R    | 74.0237   | 73.0284         |           | <b>175.1190</b>  | 158.0924        |

| Seq    | ya       | yb              | Seq    | ya       | yb              | Seq     | ya              | yb              |
|--------|----------|-----------------|--------|----------|-----------------|---------|-----------------|-----------------|
| GD     | 145.0608 | 173.0557        | GDE    | 274.1034 | 302.0983        | GDEL    | 387.1874        | <b>415.1823</b> |
| GDELT  | 488.2351 | 516.2300        | GDELTS | 575.2671 | <b>603.2620</b> | GDELTSL | 688.3512        | 716.3461        |
| DE     | 217.0819 | 245.0768        | DEL    | 330.1660 | <b>358.1609</b> | DELT    | <b>431.2136</b> | 459.2086        |
| DELTS  | 518.2457 | 546.2406        | DELTSL | 631.3297 | 659.3246        | EL      | 215.1390        | 243.1339        |
| ELT    | 316.1867 | 344.1816        | ELTS   | 403.2187 | <b>431.2136</b> | ELTSL   | 516.3028        | 544.2977        |
| ELTSLK | 644.3978 | 672.3927        | LT     | 187.1441 | 215.1390        | LTS     | 274.1761        | 302.1710        |
| LTSL   | 387.2602 | <b>415.2551</b> | LTSLK  | 515.3552 | 543.3501        | LTSLKD  | 630.3821        | 658.3770        |



|        |          |          |        |          |          |        |          |          |
|--------|----------|----------|--------|----------|----------|--------|----------|----------|
| TS     | 161.0921 | 189.0870 | TSL    | 274.1761 | 302.1710 | TSLK   | 402.2711 | 430.2660 |
| TSLKD  | 517.2980 | 545.2930 | TSLKDY | 680.3614 | 708.3563 | SL     | 173.1285 | 201.1234 |
| SLK    | 301.2234 | 329.2183 | SLKD   | 416.2504 | 444.2453 | SLKDY  | 579.3137 | 607.3086 |
| SLKDYV | 678.3821 | 706.3770 | LK     | 214.1914 | 242.1863 | LKD    | 329.2183 | 357.2132 |
| LKDY   | 492.2817 | 520.2766 | LKDYV  | 591.3501 | 619.3450 | LKDYVT | 692.3978 | 720.3927 |
| KD     | 216.1343 | 244.1292 | KDY    | 379.1976 | 407.1925 | KDYV   | 478.2660 | 506.2609 |
| KDYVT  | 579.3137 | 607.3086 | DY     | 251.1026 | 279.0975 | DYV    | 350.1710 | 378.1660 |
| DYVT   | 451.2187 | 479.2136 | YV     | 235.1441 | 263.1390 | YVT    | 336.1918 | 364.1867 |
| VT     | 173.1285 | 201.1234 |        |          |          |        |          |          |

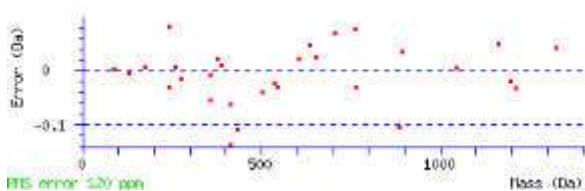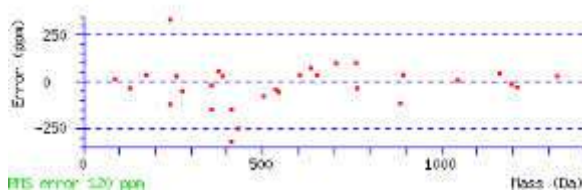

NCBI BLAST search of [SGDELTSLKDYVTR](#)

(Parameters: blastp, nr protein database, expect=20000, no filter, PAM30)

Other BLAST [web gateways](#)

#### All matches to this query

| Score | Mr(calc)  | Delta   | Sequence                         |
|-------|-----------|---------|----------------------------------|
| 34.5  | 1582.7839 | 0.0519  | <a href="#">SGDELTSLKDYVTR</a>   |
| 24.6  | 1582.7839 | 0.0519  | <a href="#">SGEDLTSLKDYVTR</a>   |
| 23.6  | 1582.9658 | -0.1300 | <a href="#">SITSILKPLEILTR</a>   |
| 18.5  | 1582.7773 | 0.0584  | <a href="#">KLHMPATTSPDDVR</a>   |
| 15.4  | 1582.8468 | -0.0110 | <a href="#">SLTAHFSPPTGTR</a>    |
| 14.7  | 1582.7369 | 0.0988  | <a href="#">TSSLSSSGGGCTAORK</a> |
| 14.2  | 1582.6900 | 0.1458  | <a href="#">DGSESWVEVOYER</a>    |
| 13.2  | 1582.8243 | 0.0114  | <a href="#">DTSLLOPGTFYLTG</a>   |
| 12.8  | 1582.8905 | -0.0548 | <a href="#">KLOFGMVYVLTLR</a>    |
| 12.7  | 1582.6901 | 0.1456  | <a href="#">MEVLMNERMNER</a>     |

Mascot: <http://www.matrixscience.com/>

**MATRIX SCIENCE Mascot Search Results**

**Peptide View Spot no 108**

MS/MS Fragmentation of **KPEEITKEEYAAFYK**

Found in **gi39104468** in **NCBI**nr, heat shock protein 90 [Oryza sativa Japonica Group]

Match to Query 94: 1844.956424 from(1845.963700,1+) intensity(0.0000) index(31)

Title: Label: C2, Spot\_Id: 219692, Peak\_List\_Id: 224829, MSMS Job\_Run\_Id: 21755, Comment:

Data file C:\Documents and Settings\Administrator\Desktop\farah BHU\spot set plate\Farah-Garima 11May 2013\ppw\_C2\_136842094000.txt

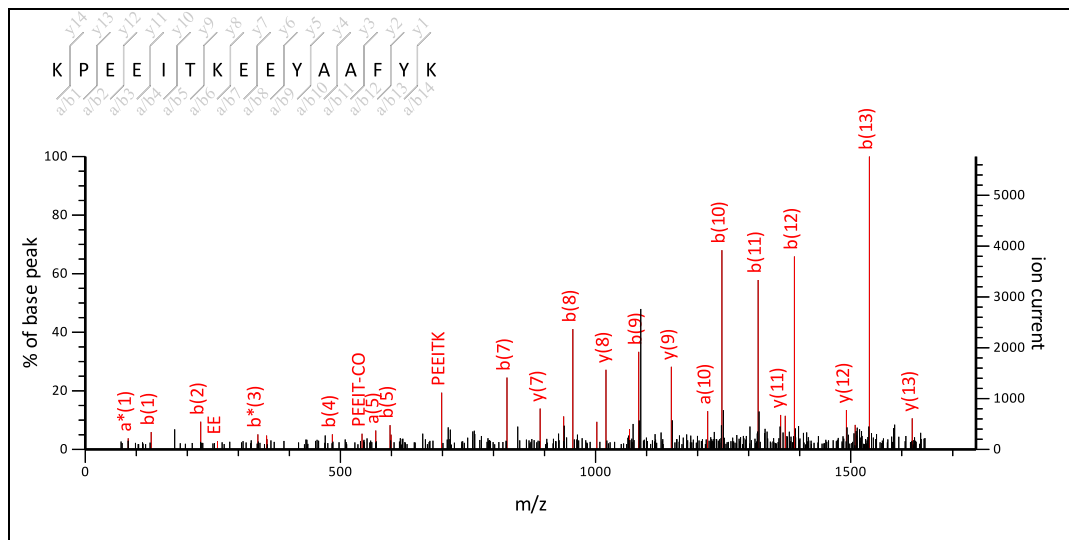

Navigation icons: Home, Back, Forward, Search, Print, etc. Range: 0 to 1745.61

Label all possible matches  Label matches used for scoring

Monoisotopic mass of neutral peptide Mr(calc): 1844.9196

Fixed modifications: Carbamidomethyl (C) (apply to specified residues or termini only)

Ions Score: 103 Expect: 1.1e-07

Matches : 35/257 fragment ions using 48 most intense peaks (help)

| #  | Immon.   | a         | a*        | a <sup>0</sup> | b         | b*        | b <sup>0</sup> | d        | d'       | Seq. | v         | w         | w'        | y         | y*        |
|----|----------|-----------|-----------|----------------|-----------|-----------|----------------|----------|----------|------|-----------|-----------|-----------|-----------|-----------|
| 1  | 101.1073 | 101.1073  | 84.0808   |                | 129.1022  | 112.0757  |                | 44.0495  |          | K    |           |           |           |           |           |
| 2  | 70.0651  | 198.1601  | 181.1335  |                | 226.1550  | 209.1285  |                | 172.1444 |          | P    | 1675.7850 | 1674.7897 |           | 1717.8319 | 1700.8054 |
| 3  | 102.0550 | 327.2027  | 310.1761  | 309.1921       | 355.1976  | 338.1710  | 337.1870       | 269.1972 |          | E    | 1546.7424 | 1545.7472 |           | 1620.7792 | 1603.7526 |
| 4  | 102.0550 | 456.2453  | 439.2187  | 438.2347       | 484.2402  | 467.2136  | 466.2296       | 398.2398 |          | E    | 1417.6998 | 1416.7046 |           | 1491.7366 | 1474.7100 |
| 5  | 86.0964  | 569.3293  | 552.3028  | 551.3188       | 597.3243  | 580.2977  | 579.3137       | 541.2980 | 555.3137 | I    | 1304.6157 | 1317.6361 | 1331.6518 | 1362.6940 | 1345.6674 |
| 6  | 74.0600  | 670.3770  | 653.3505  | 652.3665       | 698.3719  | 681.3454  | 680.3614       | 654.3821 | 656.3614 | T    | 1203.5681 | 1216.5885 | 1218.5677 | 1249.6099 | 1232.5834 |
| 7  | 101.1073 | 798.4720  | 781.4454  | 780.4614       | 826.4669  | 809.4403  | 808.4563       | 741.4141 |          | K    | 1075.4731 | 1074.4779 |           | 1148.5623 | 1131.5357 |
| 8  | 102.0550 | 927.5146  | 910.4880  | 909.5040       | 955.5095  | 938.4829  | 937.4989       | 869.5091 |          | E    | 946.4305  | 945.4353  |           | 1020.4673 | 1003.4407 |
| 9  | 102.0550 | 1056.5572 | 1039.5306 | 1038.5466      | 1084.5521 | 1067.5255 | 1066.5415      | 998.5517 |          | E    | 817.3879  | 816.3927  |           | 891.4247  | 874.3981  |
| 10 | 136.0757 | 1219.6205 | 1202.5939 | 1201.6099      | 1247.6154 | 1230.5889 | 1229.6048      |          |          | Y    | 654.3246  |           |           | 762.3821  | 745.3556  |
| 11 | 44.0495  | 1290.6576 | 1273.6311 | 1272.6470      | 1318.6525 | 1301.6260 | 1300.6420      |          |          | A    | 583.2875  |           |           | 599.3188  | 582.2922  |
| 12 | 44.0495  | 1361.6947 | 1344.6682 | 1343.6842      | 1389.6896 | 1372.6631 | 1371.6791      |          |          | A    | 512.2504  |           |           | 528.2817  | 511.2551  |
| 13 | 120.0808 | 1508.7631 | 1491.7366 | 1490.7526      | 1536.7581 | 1519.7315 | 1518.7475      |          |          | F    | 365.1819  |           |           | 457.2445  | 440.2180  |
| 14 | 136.0757 | 1671.8265 | 1654.7999 | 1653.8159      | 1699.8214 | 1682.7948 | 1681.8108      |          |          | Y    | 202.1186  |           |           | 310.1761  | 293.1496  |
| 15 | 101.1073 |           |           |                |           |           |                |          |          | K    | 74.0237   | 73.0284   |           | 147.1128  | 130.0863  |

| Seq   | ya       | yb       | Seq    | ya       | yb       | Seq   | ya       | yb       |
|-------|----------|----------|--------|----------|----------|-------|----------|----------|
| PE    | 199.1077 | 227.1026 | PEE    | 328.1503 | 356.1452 | PEEI  | 441.2344 | 469.2293 |
| PEEIT | 542.2821 | 570.2770 | PEEITK | 670.3770 | 698.3719 | EE    | 231.0975 | 259.0925 |
| E EI  | 344.1816 | 372.1765 | EEIT   | 445.2293 | 473.2242 | EEITK | 573.3243 | 601.3192 |
| EI    | 215.1390 | 243.1339 | EIT    | 316.1867 | 344.1816 | EITK  | 444.2817 | 472.2766 |
| EITKE | 573.3243 | 601.3192 | IT     | 187.1441 | 215.1390 | ITK   | 315.2391 | 343.2340 |
| ITKE  | 444.2817 | 472.2766 | ITKEE  | 573.3243 | 601.3192 | TK    | 202.1550 | 230.1499 |

|               |          |                 |               |          |          |               |          |          |
|---------------|----------|-----------------|---------------|----------|----------|---------------|----------|----------|
| <b>TKE</b>    | 331.1976 | 359.1925        | <b>TKEE</b>   | 460.2402 | 488.2351 | <b>TKEEY</b>  | 623.3035 | 651.2984 |
| <b>TKEEYA</b> | 694.3406 | 722.3355        | <b>KE</b>     | 230.1499 | 258.1448 | <b>KEE</b>    | 359.1925 | 387.1874 |
| <b>KEEY</b>   | 522.2558 | 550.2508        | <b>KEEYA</b>  | 593.2930 | 621.2879 | <b>KEEYAA</b> | 664.3301 | 692.3250 |
| <b>EE</b>     | 231.0975 | <b>259.0925</b> | <b>EEY</b>    | 394.1609 | 422.1558 | <b>EEYA</b>   | 465.1980 | 493.1929 |
| <b>EEYAA</b>  | 536.2351 | 564.2300        | <b>EEYAAF</b> | 683.3035 | 711.2984 | <b>EY</b>     | 265.1183 | 293.1132 |
| <b>EYA</b>    | 336.1554 | 364.1503        | <b>EYAA</b>   | 407.1925 | 435.1874 | <b>EYAAF</b>  | 554.2609 | 582.2558 |
| <b>YA</b>     | 207.1128 | 235.1077        | <b>YAA</b>    | 278.1499 | 306.1448 | <b>YAAF</b>   | 425.2183 | 453.2132 |
| <b>YAAFY</b>  | 588.2817 | 616.2766        | <b>AA</b>     | 115.0866 | 143.0815 | <b>AAF</b>    | 262.1550 | 290.1499 |
| <b>AAFY</b>   | 425.2183 | 453.2132        | <b>AF</b>     | 191.1179 | 219.1128 | <b>AFY</b>    | 354.1812 | 382.1761 |
| <b>FY</b>     | 283.1441 | 311.1390        |               |          |          |               |          |          |

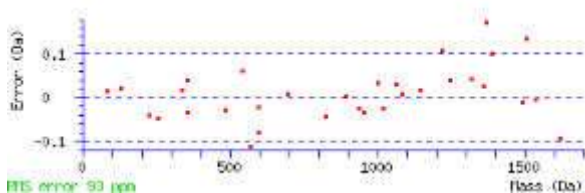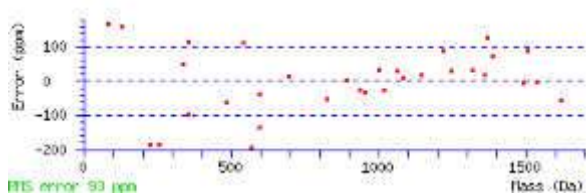

NCBI BLAST search of [KPEEITKEEYAAFYK](#)

(Parameters: blastp, nr protein database, expect=20000, no filter, PAM30)

Other BLAST [web gateways](#)

#### All matches to this query

| Score | Mr(calc)  | Delta   | Sequence                           |
|-------|-----------|---------|------------------------------------|
| 103.1 | 1844.9196 | 0.0369  | <a href="#">KPEEITKEEYAAFYK</a>    |
| 19.3  | 1844.8580 | 0.0984  | <a href="#">NPEEITRDEYAAFYK</a>    |
| 11.9  | 1844.9818 | -0.0254 | <a href="#">VMLPAVAKAGQIEEAFR</a>  |
| 11.5  | 1844.8913 | 0.0651  | <a href="#">MFLEKPOPPSMPNSAR</a>   |
| 9.8   | 1844.9025 | 0.0539  | <a href="#">KPSSAASLFGRMAMGFR</a>  |
| 8.6   | 1845.0546 | -0.0982 | <a href="#">KPIMFVGGAGVGKTQLVK</a> |
| 8.5   | 1844.8767 | 0.0797  | <a href="#">QYVEAGDWKAAVAMYK</a>   |
| 8.5   | 1844.9917 | -0.0353 | <a href="#">RLILTQEEMEEVVLK</a>    |
| 8.2   | 1844.9169 | 0.0395  | <a href="#">LVPFASTWAOQANEGAR</a>  |
| 8.1   | 1845.0294 | -0.0730 | <a href="#">KLELMVLDNHLHVR</a>     |

Mascot: <http://www.matrixscience.com/>

**MATRIX SCIENCE Mascot Search Results**

**Peptide View Spot no 108**

MS/MS Fragmentation of **MKEGQSEIYYITGESK**

Found in **gi39104468** in **NCBI**nr, heat shock protein 90 [Oryza sativa Japonica Group]

Match to Query 96: 1877.903324 from(1878.910600,1+) intensity(0.0000) index(32)

Title: Label: C2, Spot\_Id: 219692, Peak\_List\_Id: 224847, MSMS Job\_Run\_Id: 21755, Comment:

Data file C:\Documents and Settings\Administrator\Desktop\farah BHU\spot set plate\Farah-Garima 11May 2013\ppw\_C2\_136842094000.txt

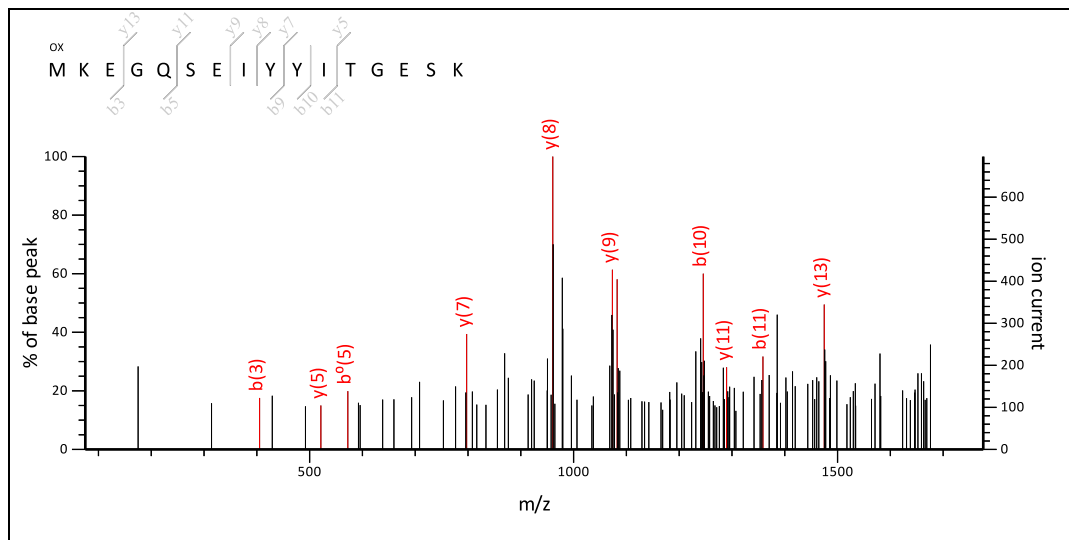

Navigation icons: Home, Back, Forward, Search, Print, Refresh. Search range: 75.12 to 1775.99.

Label all possible matches  Label matches used for scoring

Monoisotopic mass of neutral peptide Mr(calc): 1877.8717

Fixed modifications: Carbamidomethyl (C) (apply to specified residues or termini only)

Variable modifications:

M1 : Oxidation (M), with neutral losses 0.0000 (shown in table), 63.9983

Ions Score: 17 Expect: 32

Matches : 11/385 fragment ions using 29 most intense peaks [\(help\)](#)

| #  | Immon.   | a         | a*        | a <sup>0</sup> | b                | b*        | b <sup>0</sup>  | d         | d'        | Seq. | v         | w         | w'        | y                | y*        |
|----|----------|-----------|-----------|----------------|------------------|-----------|-----------------|-----------|-----------|------|-----------|-----------|-----------|------------------|-----------|
| 1  | 120.0478 | 120.0478  |           |                | 148.0427         |           |                 | 44.0495   |           | M    |           |           |           |                  |           |
| 2  | 101.1073 | 248.1427  | 231.1162  |                | 276.1376         | 259.1111  |                 | 191.0849  |           | K    | 1658.7544 | 1657.7592 |           | 1731.8436        | 1714.8170 |
| 3  | 102.0550 | 377.1853  | 360.1588  | 359.1748       | <b>405.1802</b>  | 388.1537  | 387.1697        | 319.1798  |           | E    | 1529.7118 | 1528.7166 |           | 1603.7486        | 1586.7221 |
| 4  | 30.0338  | 434.2068  | 417.1802  | 416.1962       | 462.2017         | 445.1751  | 444.1911        |           |           | G    |           |           |           | <b>1474.7060</b> | 1457.6795 |
| 5  | 101.0709 | 562.2654  | 545.2388  | 544.2548       | 590.2603         | 573.2337  | <b>572.2497</b> | 505.2439  |           | Q    | 1344.6318 | 1343.6365 |           | 1417.6846        | 1400.6580 |
| 6  | 60.0444  | 649.2974  | 632.2708  | 631.2868       | 677.2923         | 660.2658  | 659.2817        | 633.3025  |           | S    | 1257.5998 | 1256.6045 |           | <b>1289.6260</b> | 1272.5994 |
| 7  | 102.0550 | 778.3400  | 761.3134  | 760.3294       | 806.3349         | 789.3083  | 788.3243        | 720.3345  |           | E    | 1128.5572 | 1127.5619 |           | 1202.5939        | 1185.5674 |
| 8  | 86.0964  | 891.4240  | 874.3975  | 873.4135       | 919.4190         | 902.3924  | 901.4084        | 863.3927  | 877.4084  | I    | 1015.4731 | 1028.4935 | 1042.5092 | <b>1073.5514</b> | 1056.5248 |
| 9  | 136.0757 | 1054.4874 | 1037.4608 | 1036.4768      | <b>1082.4823</b> | 1065.4557 | 1064.4717       |           |           | Y    | 852.4098  |           |           | <b>960.4673</b>  | 943.4407  |
| 10 | 136.0757 | 1217.5507 | 1200.5242 | 1199.5401      | <b>1245.5456</b> | 1228.5191 | 1227.5351       |           |           | Y    | 689.3464  |           |           | <b>797.4040</b>  | 780.3774  |
| 11 | 86.0964  | 1330.6348 | 1313.6082 | 1312.6242      | <b>1358.6297</b> | 1341.6031 | 1340.6191       | 1302.6035 | 1316.6191 | I    | 576.2624  | 589.2828  | 603.2984  | 634.3406         | 617.3141  |
| 12 | 74.0600  | 1431.6824 | 1414.6559 | 1413.6719      | 1459.6774        | 1442.6508 | 1441.6668       | 1415.6875 | 1417.6668 | T    | 475.2147  | 488.2351  | 490.2144  | <b>521.2566</b>  | 504.2300  |
| 13 | 30.0338  | 1488.7039 | 1471.6774 | 1470.6933      | 1516.6988        | 1499.6723 | 1498.6883       |           |           | G    |           |           |           | 420.2089         | 403.1823  |
| 14 | 102.0550 | 1617.7465 | 1600.7200 | 1599.7359      | 1645.7414        | 1628.7149 | 1627.7309       | 1559.7410 |           | E    | 289.1506  | 288.1554  |           | 363.1874         | 346.1609  |
| 15 | 60.0444  | 1704.7785 | 1687.7520 | 1686.7680      | 1732.7734        | 1715.7469 | 1714.7629       | 1688.7836 |           | S    | 202.1186  | 201.1234  |           | 234.1448         | 217.1183  |
| 16 | 101.1073 |           |           |                |                  |           |                 |           |           | K    | 74.0237   | 73.0284   |           | 147.1128         | 130.0863  |

| Seq   | ya       | yb       | Seq    | ya       | yb       | Seq  | ya       | yb       |
|-------|----------|----------|--------|----------|----------|------|----------|----------|
| KE    | 230.1499 | 258.1448 | KEG    | 287.1714 | 315.1663 | KEGQ | 415.2300 | 443.2249 |
| KEGQS | 502.2620 | 530.2569 | KEGQSE | 631.3046 | 659.2995 | EG   | 159.0764 | 187.0713 |

|        |          |          |        |          |          |        |          |          |
|--------|----------|----------|--------|----------|----------|--------|----------|----------|
| EGQ    | 287.1350 | 315.1299 | EGQS   | 374.1670 | 402.1619 | EGQSE  | 503.2096 | 531.2045 |
| EGQSEI | 616.2937 | 644.2886 | GQ     | 158.0924 | 186.0873 | GQS    | 245.1244 | 273.1193 |
| GQSE   | 374.1670 | 402.1619 | GQSEI  | 487.2511 | 515.2460 | GQSEIY | 650.3144 | 678.3093 |
| QS     | 188.1030 | 216.0979 | QSE    | 317.1456 | 345.1405 | QSEI   | 430.2296 | 458.2245 |
| QSEIY  | 593.2930 | 621.2879 | SE     | 189.0870 | 217.0819 | SEI    | 302.1710 | 330.1660 |
| SEIY   | 465.2344 | 493.2293 | SEIYY  | 628.2977 | 656.2926 | EI     | 215.1390 | 243.1339 |
| EIY    | 378.2023 | 406.1973 | EIYY   | 541.2657 | 569.2606 | EIYYI  | 654.3497 | 682.3447 |
| IY     | 249.1598 | 277.1547 | IYY    | 412.2231 | 440.2180 | IYYI   | 525.3071 | 553.3021 |
| IYYIT  | 626.3548 | 654.3497 | IYYITG | 683.3763 | 711.3712 | YY     | 299.1390 | 327.1339 |
| YYI    | 412.2231 | 440.2180 | YYIT   | 513.2708 | 541.2657 | YYITG  | 570.2922 | 598.2871 |
| YYITGE | 699.3348 | 727.3297 | YI     | 249.1598 | 277.1547 | YIT    | 350.2074 | 378.2023 |
| YITG   | 407.2289 | 435.2238 | YITGE  | 536.2715 | 564.2664 | YITGES | 623.3035 | 651.2984 |
| IT     | 187.1441 | 215.1390 | ITG    | 244.1656 | 272.1605 | ITGE   | 373.2082 | 401.2031 |
| ITGES  | 460.2402 | 488.2351 | TG     | 131.0815 | 159.0764 | TGE    | 260.1241 | 288.1190 |
| TGES   | 347.1561 | 375.1510 | GE     | 159.0764 | 187.0713 | GES    | 246.1084 | 274.1034 |
| ES     | 189.0870 | 217.0819 |        |          |          |        |          |          |

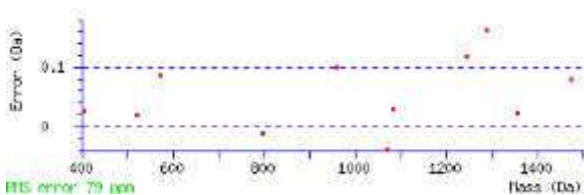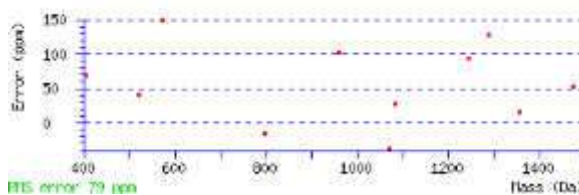

NCBI BLAST search of [MKEGQSEIYYITGESK](#)

(Parameters: blastp, nr protein database, expect=20000, no filter, PAM30)

Other BLAST [web gateways](#)

#### All matches to this query

| Score | Mr(calc)  | Delta   | Sequence                           |
|-------|-----------|---------|------------------------------------|
| 17.2  | 1877.8717 | 0.0317  | <a href="#">MKEGQSEIYYITGESK</a>   |
| 17.2  | 1877.8717 | 0.0317  | <a href="#">MKEGQSEIYYITGESK</a>   |
| 17.2  | 1877.8353 | 0.0680  | <a href="#">MOEGQSEIYYITGESK</a>   |
| 15.4  | 1878.0251 | -0.1217 | <a href="#">ILFFIGDLEVASAEAKR</a>  |
| 7.3   | 1878.0615 | -0.1581 | <a href="#">SSVLALILRFYDPISGK</a>  |
| 6.4   | 1877.8764 | 0.0269  | <a href="#">HGFEAEEMVKVMYSNR</a>   |
| 6.4   | 1877.8248 | 0.0786  | <a href="#">DCAGDDDAVAAGIICSLR</a> |
| 6.4   | 1877.8877 | 0.0157  | <a href="#">GKVHVATCPHGTTCEPK</a>  |
| 5.2   | 1877.9339 | -0.0306 | <a href="#">SSMAKVCDLAQVIGVR</a>   |
| 4.9   | 1877.9345 | -0.0312 | <a href="#">VYEELNALMPFSPNVR</a>   |

Mascot: <http://www.matrixscience.com/>



# Mascot Search Results

## Peptide View Spot no 110

MS/MS Fragmentation of **LDEMIVFR**

Found in **gi|18423214** in **NCBI**nr, ATP-dependent Clp protease ATP-binding subunit ClpC [Arabidopsis thaliana]

Match to Query 88: 1021.553424 from(1022.560700,1+) intensity(0.0000) index(3)

Title: Label: C9, Spot\_Id: 219804, Peak\_List\_Id: 226663, MSMS Job\_Run\_Id: 21852, Comment:

Data file C:\Documents and Settings\Administrator\Desktop\Farah-Garima 11May 2013\ppw\_C9\_136859938300.txt

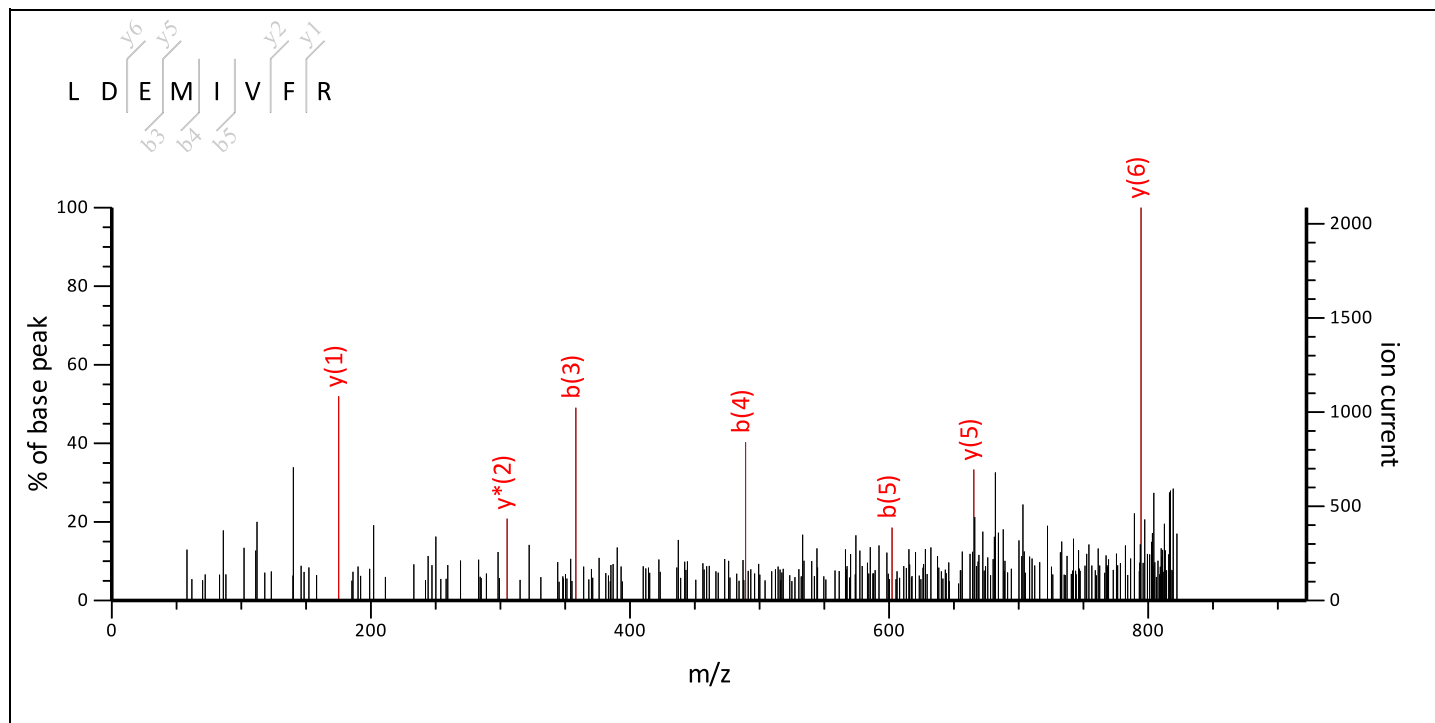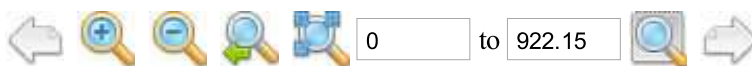

Label all possible matches  Label matches used for scoring

**Monoisotopic mass of neutral peptide Mr(calc):** 1021.5266

**Fixed modifications:** Carbamidomethyl (C) (apply to specified residues or termini only)

**Ions Score:** 29 **Expect:** 48

**Matches :** 7/28 fragment ions using 8 most intense peaks ([help](#))

| # | a        | b               | Seq. | y               | y*              | # |
|---|----------|-----------------|------|-----------------|-----------------|---|
| 1 | 86.0964  | 114.0913        | L    |                 |                 | 8 |
| 2 | 201.1234 | 229.1183        | D    | 909.4499        | 892.4233        | 7 |
| 3 | 330.1660 | <b>358.1609</b> | E    | <b>794.4229</b> | 777.3964        | 6 |
| 4 | 461.2064 | <b>489.2014</b> | M    | <b>665.3803</b> | 648.3538        | 5 |
| 5 | 574.2905 | <b>602.2854</b> | I    | 534.3398        | 517.3133        | 4 |
| 6 | 673.3589 | 701.3538        | V    | 421.2558        | 404.2292        | 3 |
| 7 | 820.4273 | 848.4223        | F    | 322.1874        | <b>305.1608</b> | 2 |
| 8 |          |                 | R    | <b>175.1190</b> | 158.0924        | 1 |

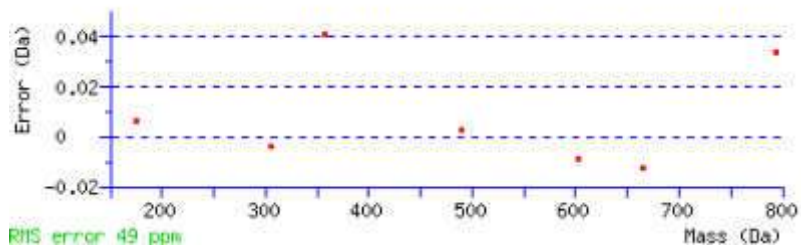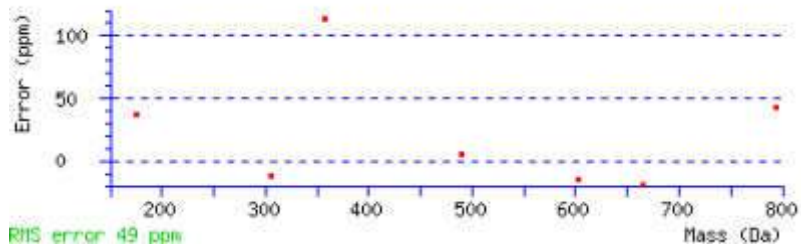

NCBI BLAST search of [LDEMIVFR](#)

(Parameters: blastp, nr protein database, expect=20000, no filter, PAM30)

Other BLAST [web gateways](#)

#### All matches to this query

| Score | Mr(calc)  | Delta  | Sequence                 |
|-------|-----------|--------|--------------------------|
| 28.9  | 1021.5266 | 0.0268 | <a href="#">IDEMLVFR</a> |
| 28.9  | 1021.5266 | 0.0268 | <a href="#">LDEMIVFR</a> |
| 25.8  | 1021.4539 | 0.0996 | <a href="#">DLEMPDFR</a> |
| 23.3  | 1021.4716 | 0.0818 | <a href="#">EVEDIDFR</a> |
| 17.6  | 1021.4936 | 0.0598 | <a href="#">DLELMVMR</a> |
| 17.6  | 1021.4716 | 0.0818 | <a href="#">EVEDEVER</a> |
| 17.6  | 1021.4903 | 0.0632 | <a href="#">EVEMPVFR</a> |
| 17.6  | 1021.5055 | 0.0479 | <a href="#">MPEPFVFR</a> |
| 17.6  | 1021.4685 | 0.0850 | <a href="#">NNELMVMR</a> |
| 17.6  | 1021.4903 | 0.0632 | <a href="#">VEEMPVFR</a> |

Mascot: <http://www.matrixscience.com/>





# Mascot Search Results

## Peptide View Spot no 110

MS/MS Fragmentation of **LAEEGKLDPVVGR**

Found in **gi|18423214** in **NCBI nr**, ATP-dependent Clp protease ATP-binding subunit ClpC [Arabidopsis thaliana]

Match to Query 197: 1381.789724 from(1382.797000,1+) intensity(0.0000) index(15)

Title: Label: C9, Spot\_Id: 219804, Peak\_List\_Id: 226664, MSMS Job\_Run\_Id: 21852, Comment:

Data file C:\Documents and Settings\Administrator\Desktop\Farah-Garima 11May 2013\ppw\_C9\_136859938300.txt

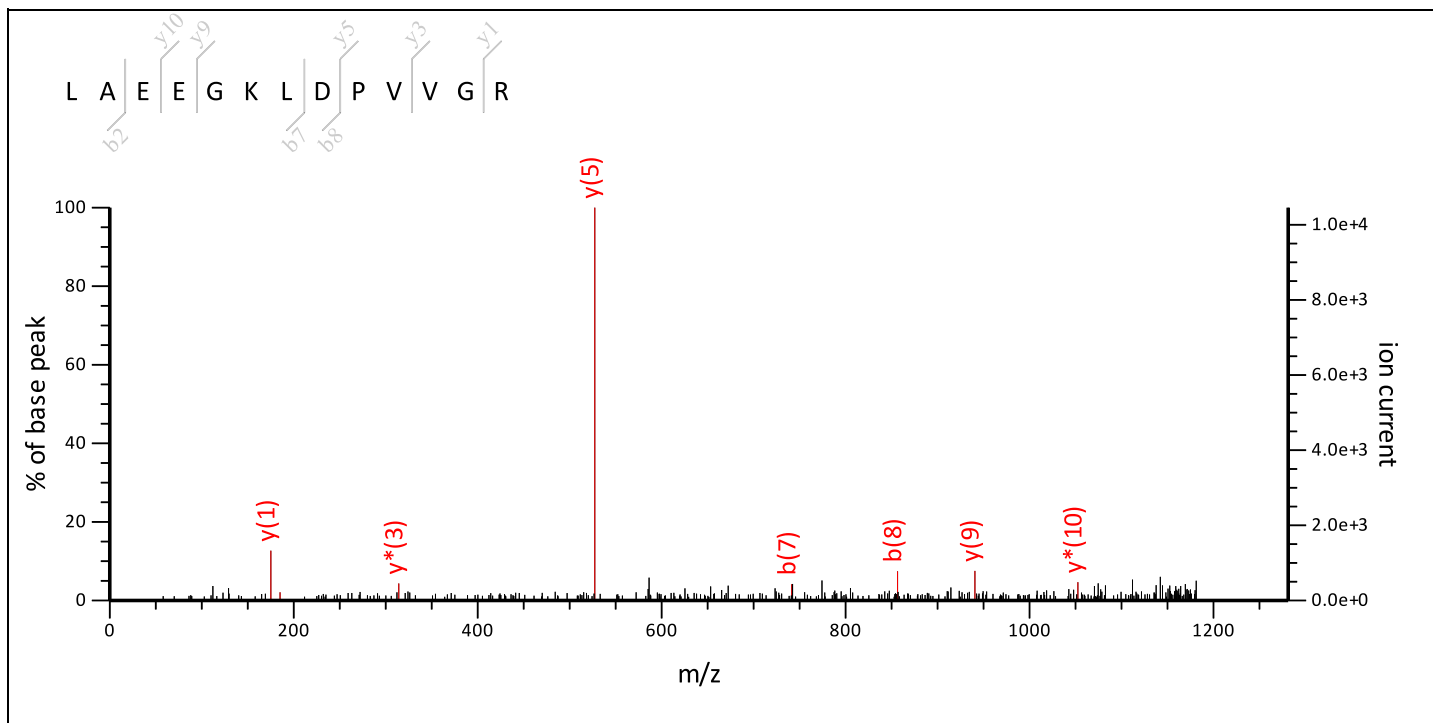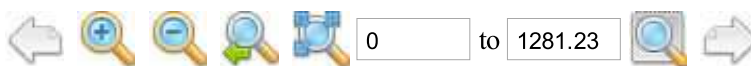

Label all possible matches  Label matches used for scoring

**Monoisotopic mass of neutral peptide Mr(calc):** 1381.7565

**Fixed modifications:** Carbamidomethyl (C) (apply to specified residues or termini only)

**Ions Score:** 18 **Expect:** 4.3e+02

**Matches :** 10/62 fragment ions using 24 most intense peaks ([help](#))

| # | a        | a*       | b               | b*       | Seq. | y               | y*               | #  |
|---|----------|----------|-----------------|----------|------|-----------------|------------------|----|
| 1 | 86.0964  |          | 114.0913        |          | L    |                 |                  | 13 |
| 2 | 157.1335 |          | <b>185.1285</b> |          | A    | 1269.6797       | 1252.6532        | 12 |
| 3 | 286.1761 |          | <b>314.1710</b> |          | E    | 1198.6426       | 1181.6161        | 11 |
| 4 | 415.2187 |          | 443.2136        |          | E    | 1069.6000       | <b>1052.5735</b> | 10 |
| 5 | 472.2402 |          | 500.2351        |          | G    | <b>940.5574</b> | 923.5309         | 9  |
| 6 | 600.3352 | 583.3086 | 628.3301        | 611.3035 | K    | 883.5360        | 866.5094         | 8  |
| 7 | 713.4192 | 696.3927 | <b>741.4141</b> | 724.3876 | L    | 755.4410        | 738.4145         | 7  |
| 8 | 828.4462 | 811.4196 | <b>856.4411</b> | 839.4145 | D    | 642.3570        | 625.3304         | 6  |

|    |           |           |                  |           |   |                 |                 |   |
|----|-----------|-----------|------------------|-----------|---|-----------------|-----------------|---|
| 9  | 925.4989  | 908.4724  | 953.4938         | 936.4673  | P | <b>527.3300</b> | 510.3035        | 5 |
| 10 | 1024.5673 | 1007.5408 | <b>1052.5623</b> | 1035.5357 | V | 430.2772        | 413.2507        | 4 |
| 11 | 1123.6358 | 1106.6092 | 1151.6307        | 1134.6041 | V | 331.2088        | <b>314.1823</b> | 3 |
| 12 | 1180.6572 | 1163.6307 | 1208.6521        | 1191.6256 | G | 232.1404        | 215.1139        | 2 |
| 13 |           |           |                  |           | R | <b>175.1190</b> | 158.0924        | 1 |

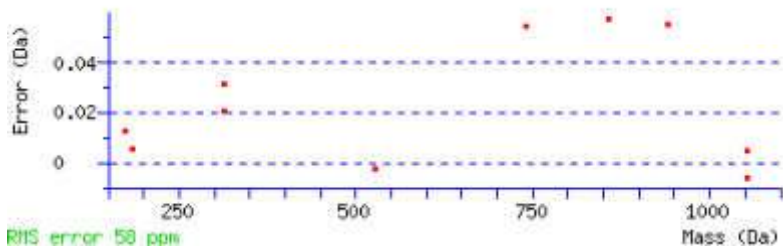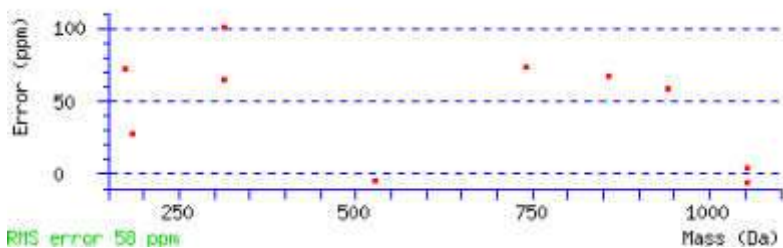

NCBI BLAST search of [LAEEGKLDPVVGR](#)

(Parameters: blastp, nr protein database, expect=20000, no filter, PAM30)

Other BLAST [web gateways](#)

#### All matches to this query

| Score | Mr(calc)  | Delta   | Sequence                        |
|-------|-----------|---------|---------------------------------|
| 18.0  | 1381.7354 | 0.0543  | <a href="#">ISPKTNGVTYFR</a>    |
| 17.9  | 1381.7565 | 0.0332  | <a href="#">LAEEGKLDPVVGR</a>   |
| 17.9  | 1381.7215 | 0.0683  | <a href="#">LAPSASNRQPWR</a>    |
| 17.4  | 1381.7426 | 0.0471  | <a href="#">IGTALANRGPEAGR</a>  |
| 15.8  | 1381.7426 | 0.0471  | <a href="#">NEAVLNRPOVSR</a>    |
| 15.8  | 1381.7466 | 0.0431  | <a href="#">SIAAALNRTFYR</a>    |
| 15.3  | 1381.7062 | 0.0835  | <a href="#">AGSITPNRPAADGR</a>  |
| 14.9  | 1381.7790 | 0.0107  | <a href="#">AVIDAGGGRVLGAAR</a> |
| 13.9  | 1381.8154 | -0.0256 | <a href="#">SVKIVSRPVNQR</a>    |
| 13.9  | 1381.7677 | 0.0220  | <a href="#">QKGEQTALAIAPR</a>   |

Mascot: <http://www.matrixscience.com/>



# Mascot Search Results

## Peptide View Spot no 110

MS/MS Fragmentation of **GSGFVAVEIPFTR**

Found in **gi|18423214** in **NCBI nr**, ATP-dependent Clp protease ATP-binding subunit ClpC [Arabidopsis thaliana]

Match to Query 213: 1475.807424 from(1476.814700,1+) intensity(0.0000) index(18)

Title: Label: C9, Spot\_Id: 219804, Peak\_List\_Id: 226647, MSMS Job\_Run\_Id: 21852, Comment:

Data file C:\Documents and Settings\Administrator\Desktop\Farah-Garima 11May 2013\ppw\_C9\_136859938300.txt

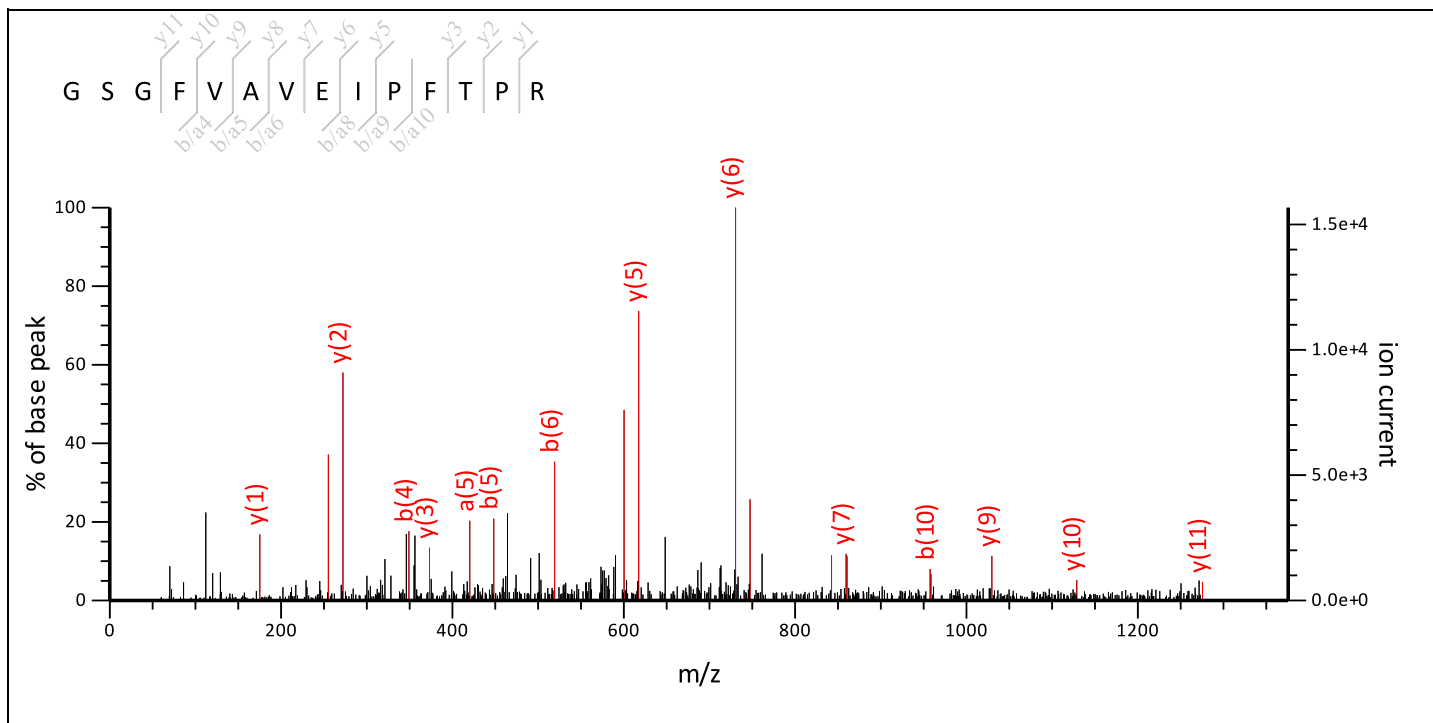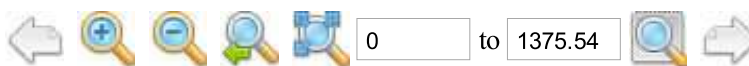

Label all possible matches  Label matches used for scoring

**Monoisotopic mass of neutral peptide Mr(calc):** 1475.7773

**Fixed modifications:** Carbamidomethyl (C) (apply to specified residues or termini only)

**Ions Score:** 62 **Expect:** 0.02

**Matches :** 20/52 fragment ions using 39 most intense peaks ([help](#))

| # | a               | b               | Seq. | y                | y*              | #  |
|---|-----------------|-----------------|------|------------------|-----------------|----|
| 1 | 30.0338         | 58.0287         | G    |                  |                 | 14 |
| 2 | 117.0659        | 145.0608        | S    | 1419.7631        | 1402.7365       | 13 |
| 3 | 174.0873        | 202.0822        | G    | 1332.7311        | 1315.7045       | 12 |
| 4 | 321.1557        | <b>349.1506</b> | F    | <b>1275.7096</b> | 1258.6830       | 11 |
| 5 | <b>420.2241</b> | <b>448.2191</b> | V    | <b>1128.6412</b> | 1111.6146       | 10 |
| 6 | 491.2613        | <b>519.2562</b> | A    | <b>1029.5728</b> | 1012.5462       | 9  |
| 7 | 590.3297        | 618.3246        | V    | <b>958.5356</b>  | 941.5091        | 8  |
| 8 | 719.3723        | <b>747.3672</b> | E    | <b>859.4672</b>  | <b>842.4407</b> | 7  |

|    |           |           |   |          |          |   |
|----|-----------|-----------|---|----------|----------|---|
| 9  | 832.4563  | 860.4512  | I | 730.4246 | 713.3981 | 6 |
| 10 | 929.5091  | 957.5040  | P | 617.3406 | 600.3140 | 5 |
| 11 | 1076.5775 | 1104.5724 | F | 520.2878 | 503.2613 | 4 |
| 12 | 1177.6252 | 1205.6201 | T | 373.2194 | 356.1928 | 3 |
| 13 | 1274.6780 | 1302.6729 | P | 272.1717 | 255.1452 | 2 |
| 14 |           |           | R | 175.1190 | 158.0924 | 1 |

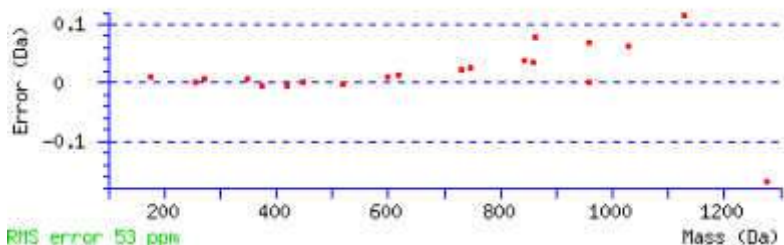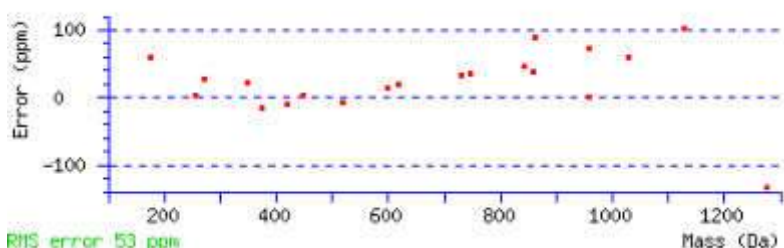

NCBI BLAST search of [GSGFVAVEIPFTPR](#)

(Parameters: blastp, nr protein database, expect=20000, no filter, PAM30)

Other BLAST [web gateways](#)

#### All matches to this query

| Score | Mr(calc)  | Delta  | Sequence                        |
|-------|-----------|--------|---------------------------------|
| 62.1  | 1475.7773 | 0.0301 | <a href="#">GSGFVAVEIPFTPR</a>  |
| 41.0  | 1475.7409 | 0.0665 | <a href="#">GSGFTP AEIPFTPR</a> |
| 17.2  | 1475.7766 | 0.0308 | <a href="#">RAGVSMELLSEIR</a>   |
| 16.8  | 1475.7224 | 0.0850 | <a href="#">RVMETLEQMAPR</a>    |
| 16.7  | 1475.7845 | 0.0230 | <a href="#">QNSSVTLRTEFAPR</a>  |
| 16.2  | 1475.7256 | 0.0818 | <a href="#">FLEEVELEQGQR</a>    |
| 15.2  | 1475.7265 | 0.0810 | <a href="#">MKFPPLPETMNR</a>    |
| 15.2  | 1475.6926 | 0.1148 | <a href="#">EMLQDLIDTENR</a>    |
| 15.1  | 1475.7038 | 0.1036 | <a href="#">NSMVQPKTSSEPR</a>   |
| 14.9  | 1475.7620 | 0.0454 | <a href="#">VEYQPLVSLSEGR</a>   |

Mascot: <http://www.matrixscience.com/>



# Mascot Search Results

## Peptide View Spot no 110

MS/MS Fragmentation of **RPYTVVLFDEIEK**

Found in **gi|18423214** in **NCBI nr**, ATP-dependent Clp protease ATP-binding subunit ClpC [Arabidopsis thaliana]

Match to Query 236: 1607.891724 from(1608.899000,1+) intensity(0.0000) index(22)

Title: Label: C9, Spot\_Id: 219804, Peak\_List\_Id: 226658, MSMS Job\_Run\_Id: 21852, Comment:

Data file C:\Documents and Settings\Administrator\Desktop\Farah-Garima 11May 2013\ppw\_C9\_136859938300.txt

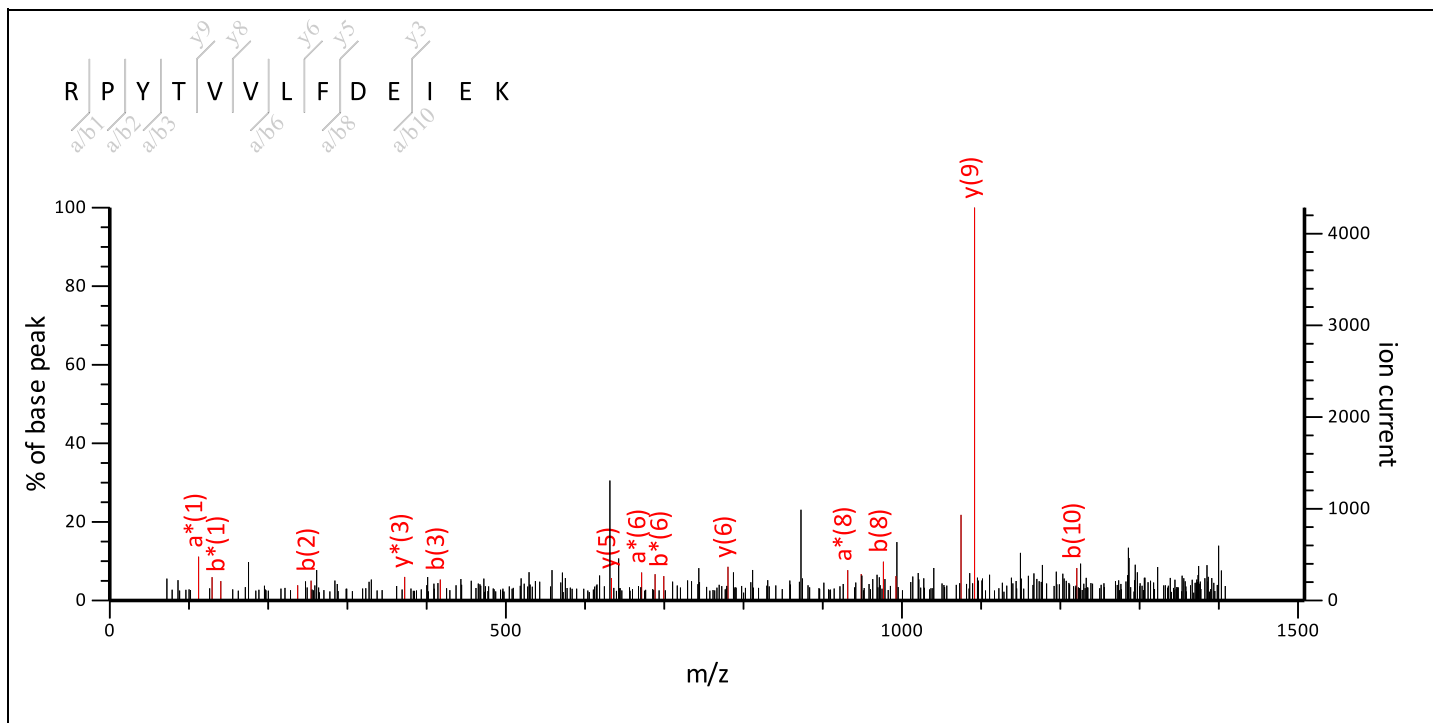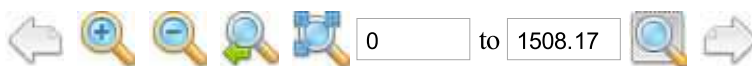

Label all possible matches  Label matches used for scoring

**Monoisotopic mass of neutral peptide Mr(calc):** 1607.8559

**Fixed modifications:** Carbamidomethyl (C) (apply to specified residues or termini only)

**Ions Score:** 7 **Expect:** 5.9e+03

**Matches:** 22/72 fragment ions using 70 most intense peaks ([help](#))

| # | a        | a*       | b        | b*       | Seq. | y         | y*        | #  |
|---|----------|----------|----------|----------|------|-----------|-----------|----|
| 1 | 129.1135 | 112.0869 | 157.1084 | 140.0818 | R    |           |           | 13 |
| 2 | 226.1662 | 209.1397 | 254.1612 | 237.1346 | P    | 1452.7621 | 1435.7355 | 12 |
| 3 | 389.2296 | 372.2030 | 417.2245 | 400.1979 | Y    | 1355.7093 | 1338.6828 | 11 |
| 4 | 490.2772 | 473.2507 | 518.2722 | 501.2456 | T    | 1192.6460 | 1175.6194 | 10 |
| 5 | 589.3457 | 572.3191 | 617.3406 | 600.3140 | V    | 1091.5983 | 1074.5718 | 9  |
| 6 | 688.4141 | 671.3875 | 716.4090 | 699.3824 | V    | 992.5299  | 975.5033  | 8  |
| 7 | 801.4981 | 784.4716 | 829.4931 | 812.4665 | L    | 893.4615  | 876.4349  | 7  |
| 8 | 948.5666 | 931.5400 | 976.5615 | 959.5349 | F    | 780.3774  | 763.3509  | 6  |

|    |           |           |                  |                  |   |                 |                 |   |
|----|-----------|-----------|------------------|------------------|---|-----------------|-----------------|---|
| 9  | 1063.5935 | 1046.5669 | <b>1091.5884</b> | <b>1074.5619</b> | D | <b>633.3090</b> | 616.2824        | 5 |
| 10 | 1192.6361 | 1175.6095 | <b>1220.6310</b> | 1203.6045        | E | 518.2821        | 501.2555        | 4 |
| 11 | 1305.7201 | 1288.6936 | 1333.7151        | 1316.6885        | I | 389.2395        | <b>372.2129</b> | 3 |
| 12 | 1434.7627 | 1417.7362 | 1462.7577        | 1445.7311        | E | 276.1554        | 259.1288        | 2 |
| 13 |           |           |                  |                  | K | 147.1128        | 130.0863        | 1 |

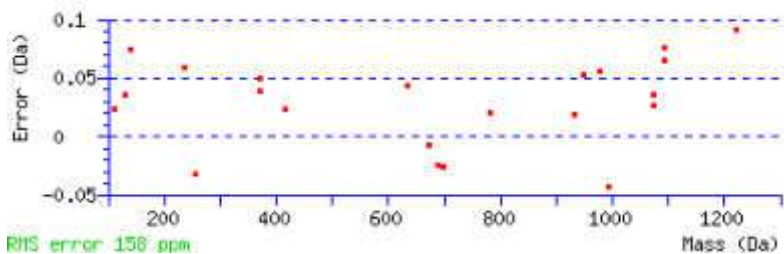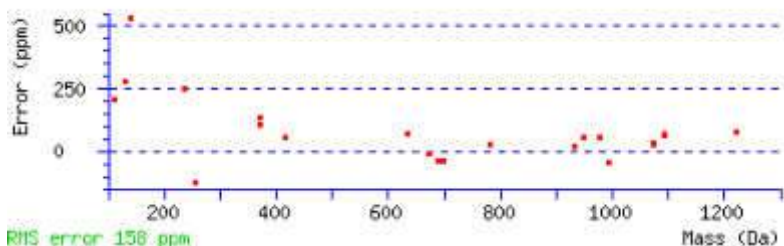

NCBI **BLAST** search of [RPYTVVLFDEIEK](#)

(Parameters: blastp, nr protein database, expect=20000, no filter, PAM30)

Other BLAST [web gateways](#)

#### All matches to this query

| Score | Mr(calc)  | Delta  | Sequence                        |
|-------|-----------|--------|---------------------------------|
| 13.6  | 1607.8090 | 0.0828 | <a href="#">ARGSADLSAFMPLTR</a> |
| 11.1  | 1607.7348 | 0.1569 | <a href="#">IDTLKEEMDEAGNK</a>  |
| 11.1  | 1607.7348 | 0.1569 | <a href="#">IESLKEEMDEAGNK</a>  |
| 9.8   | 1607.7804 | 0.1113 | <a href="#">AGRWAEAHPDETLR</a>  |
| 7.8   | 1607.8341 | 0.0576 | <a href="#">SELPMRTYIETLR</a>   |
| 7.3   | 1607.8090 | 0.0827 | <a href="#">ATIMTGQYGQINGVR</a> |
| 6.9   | 1607.8559 | 0.0358 | <a href="#">RPYSVILFDEIEK</a>   |
| 6.9   | 1607.8229 | 0.0689 | <a href="#">RPYSVILMDEIEK</a>   |
| 6.9   | 1607.8559 | 0.0358 | <a href="#">RPYSVLLFDEIEK</a>   |
| 6.9   | 1607.8559 | 0.0358 | <a href="#">RPYTVVLFDEIEK</a>   |

Mascot: <http://www.matrixscience.com/>



# Mascot Search Results

## Peptide View Spot no 110

MS/MS Fragmentation of **ALAAYYFGSEEAMIR**

Found in **gi|18423214** in **NCBI**nr, ATP-dependent Clp protease ATP-binding subunit ClpC [Arabidopsis thaliana]

Match to Query 242: 1690.842624 from(1691.849900,1+) intensity(0.0000) index(23)

Title: Label: C9, Spot\_Id: 219804, Peak\_List\_Id: 226649, MSMS Job\_Run\_Id: 21852, Comment:

Data file C:\Documents and Settings\Administrator\Desktop\Farah-Garima 11May 2013\ppw\_C9\_136859938300.txt

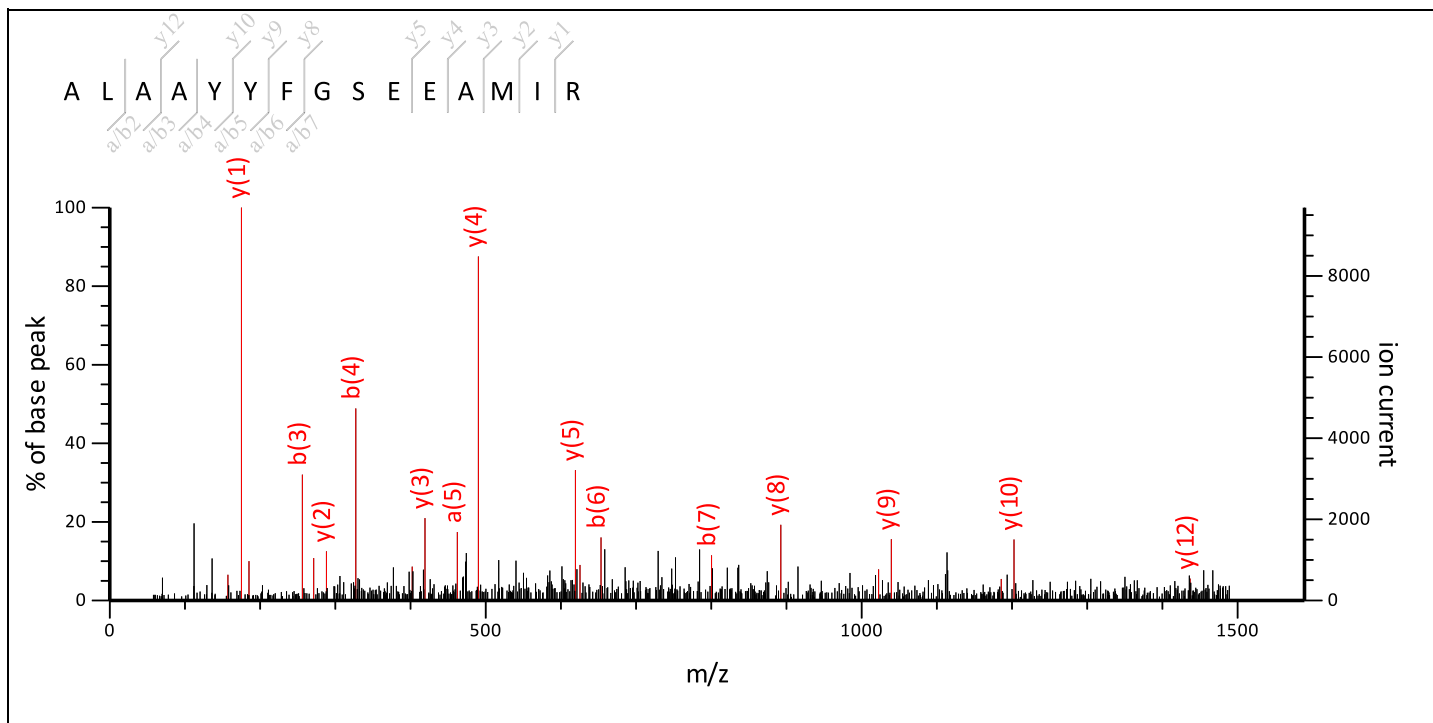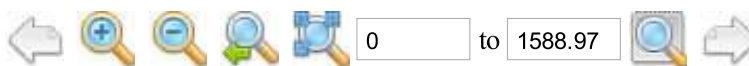

Label all possible matches  Label matches used for scoring

**Monoisotopic mass of neutral peptide Mr(calc):** 1690.8024

**Fixed modifications:** Carbamidomethyl (C) (apply to specified residues or termini only)

**Ions Score:** 47 **Expect:** 0.71

**Matches:** 23/56 fragment ions using 45 most intense peaks ([help](#))

| # | a        | b        | Seq. | y         | y*        | #  |
|---|----------|----------|------|-----------|-----------|----|
| 1 | 44.0495  | 72.0444  | A    |           |           | 15 |
| 2 | 157.1335 | 185.1285 | L    | 1620.7727 | 1603.7461 | 14 |
| 3 | 228.1707 | 256.1656 | A    | 1507.6886 | 1490.6620 | 13 |
| 4 | 299.2078 | 327.2027 | A    | 1436.6515 | 1419.6249 | 12 |
| 5 | 462.2711 | 490.2660 | Y    | 1365.6144 | 1348.5878 | 11 |
| 6 | 625.3344 | 653.3293 | Y    | 1202.5510 | 1185.5245 | 10 |
| 7 | 772.4028 | 800.3978 | F    | 1039.4877 | 1022.4612 | 9  |
| 8 | 829.4243 | 857.4192 | G    | 892.4193  | 875.3927  | 8  |



|    |           |                  |   |                 |                 |   |
|----|-----------|------------------|---|-----------------|-----------------|---|
| 9  | 916.4563  | 944.4512         | S | 835.3978        | 818.3713        | 7 |
| 10 | 1045.4989 | 1073.4938        | E | 748.3658        | 731.3393        | 6 |
| 11 | 1174.5415 | <b>1202.5364</b> | E | <b>619.3232</b> | 602.2967        | 5 |
| 12 | 1245.5786 | 1273.5735        | A | <b>490.2806</b> | 473.2541        | 4 |
| 13 | 1376.6191 | 1404.6140        | M | <b>419.2435</b> | <b>402.2170</b> | 3 |
| 14 | 1489.7032 | 1517.6981        | I | <b>288.2030</b> | <b>271.1765</b> | 2 |
| 15 |           |                  | R | <b>175.1190</b> | 158.0924        | 1 |

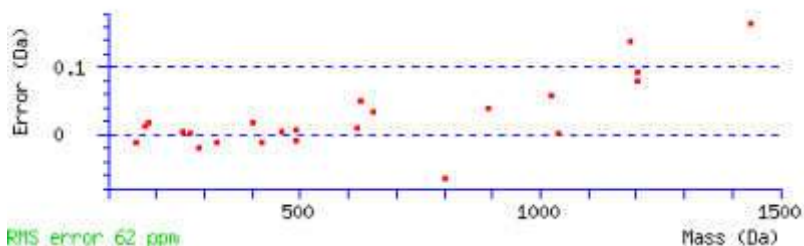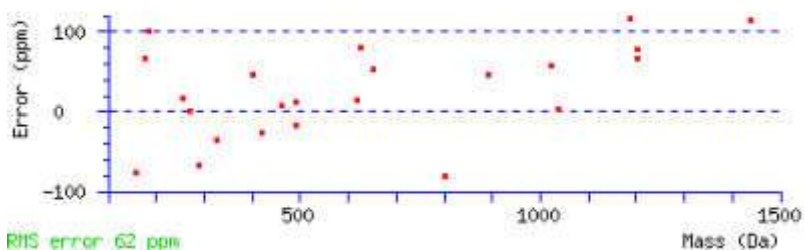

NCBI **BLAST** search of [ALAAYYFGSEEAMIR](#)

(Parameters: blastp, nr protein database, expect=20000, no filter, PAM30)

Other BLAST [web gateways](#)

#### All matches to this query

| Score | Mr(calc)  | Delta   | Sequence                         |
|-------|-----------|---------|----------------------------------|
| 46.5  | 1690.8024 | 0.0402  | <a href="#">ALAAYYFGSEEAMIR</a>  |
| 31.4  | 1690.8025 | 0.0402  | <a href="#">ALASYFFGSEEAMIR</a>  |
| 29.2  | 1690.8025 | 0.0402  | <a href="#">SLAAYFFGSEEAMIR</a>  |
| 16.0  | 1690.7001 | 0.1426  | <a href="#">MNYLDMLCESIDR</a>    |
| 14.4  | 1690.9770 | -0.1344 | <a href="#">SPAVLGKFYLAGSLLR</a> |
| 13.6  | 1690.7984 | 0.0442  | <a href="#">RVAYTSETMYEGIR</a>   |
| 12.9  | 1690.8092 | 0.0334  | <a href="#">KLLMSFMSTMDSLR</a>   |
| 12.9  | 1690.8092 | 0.0334  | <a href="#">KLLMSFMSTMDSLR</a>   |
| 12.8  | 1690.9406 | -0.0980 | <a href="#">VGYVAAPAALTVEFRK</a> |
| 12.5  | 1690.8613 | -0.0187 | <a href="#">YNLVYNHPKGS MIR</a>  |

Mascot: <http://www.matrixscience.com/>



# Mascot Search Results

## Peptide View Spot no 110

### MS/MS Fragmentation of **FLPDKAIDLIDEAGSR**

Found in **gi|18423214** in **NCBI**nr, ATP-dependent Clp protease ATP-binding subunit ClpC [Arabidopsis thaliana]

Match to Query 250: 1758.953624 from(1759.960900,1+) intensity(0.0000) index(24)

Title: Label: C9, Spot\_Id: 219804, Peak\_List\_Id: 226653, MSMS Job\_Run\_Id: 21852, Comment:

Data file C:\Documents and Settings\Administrator\Desktop\Farah-Garima 11May 2013\ppw\_C9\_136859938300.txt

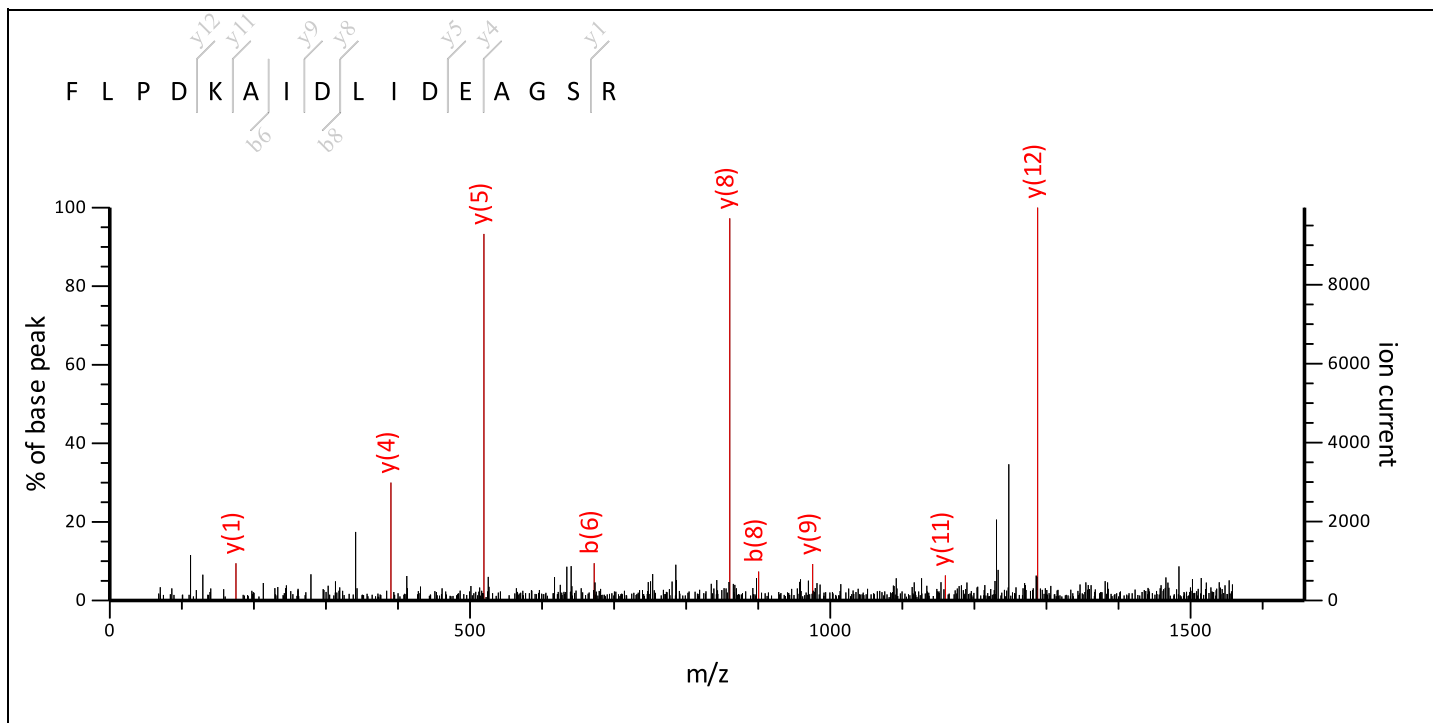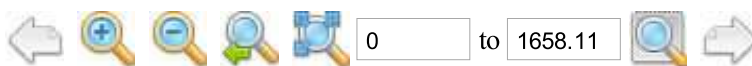

Label all possible matches  Label matches used for scoring

**Monoisotopic mass of neutral peptide Mr(calc):** 1758.9152

**Fixed modifications:** Carbamidomethyl (C) (apply to specified residues or termini only)

**Ions Score:** 45 **Expect:** 0.91

**Matches :** 9/82 fragment ions using 15 most intense peaks ([help](#))

| # | a        | a*       | b               | b*       | Seq. | y                | y*        | #  |
|---|----------|----------|-----------------|----------|------|------------------|-----------|----|
| 1 | 120.0808 |          | 148.0757        |          | F    |                  |           | 16 |
| 2 | 233.1648 |          | 261.1598        |          | L    | 1612.8541        | 1595.8275 | 15 |
| 3 | 330.2176 |          | 358.2125        |          | P    | 1499.7700        | 1482.7435 | 14 |
| 4 | 445.2445 |          | 473.2395        |          | D    | 1402.7172        | 1385.6907 | 13 |
| 5 | 573.3395 | 556.3130 | 601.3344        | 584.3079 | K    | <b>1287.6903</b> | 1270.6638 | 12 |
| 6 | 644.3766 | 627.3501 | <b>672.3715</b> | 655.3450 | A    | <b>1159.5953</b> | 1142.5688 | 11 |
| 7 | 757.4607 | 740.4341 | 785.4556        | 768.4291 | I    | 1088.5582        | 1071.5317 | 10 |
| 8 | 872.4876 | 855.4611 | <b>900.4825</b> | 883.4560 | D    | <b>975.4742</b>  | 958.4476  | 9  |

|    |           |           |           |           |   |                 |          |   |
|----|-----------|-----------|-----------|-----------|---|-----------------|----------|---|
| 9  | 985.5717  | 968.5451  | 1013.5666 | 996.5401  | L | <b>860.4472</b> | 843.4207 | 8 |
| 10 | 1098.6558 | 1081.6292 | 1126.6507 | 1109.6241 | I | 747.3632        | 730.3366 | 7 |
| 11 | 1213.6827 | 1196.6562 | 1241.6776 | 1224.6511 | D | 634.2791        | 617.2525 | 6 |
| 12 | 1342.7253 | 1325.6987 | 1370.7202 | 1353.6937 | E | <b>519.2522</b> | 502.2256 | 5 |
| 13 | 1413.7624 | 1396.7359 | 1441.7573 | 1424.7308 | A | <b>390.2096</b> | 373.1830 | 4 |
| 14 | 1470.7839 | 1453.7573 | 1498.7788 | 1481.7522 | G | 319.1724        | 302.1459 | 3 |
| 15 | 1557.8159 | 1540.7894 | 1585.8108 | 1568.7843 | S | 262.1510        | 245.1244 | 2 |
| 16 |           |           |           |           | R | <b>175.1190</b> | 158.0924 | 1 |

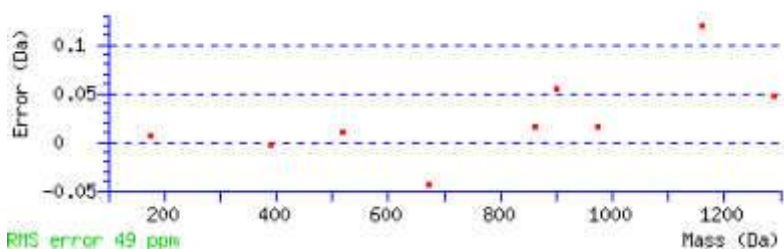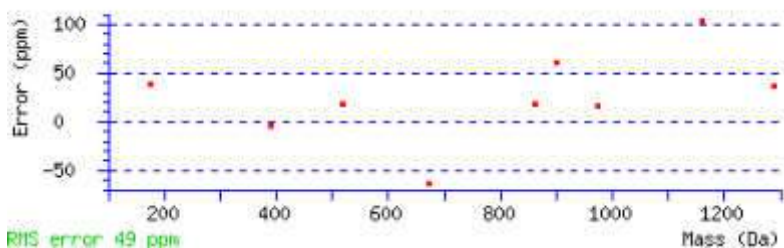

NCBI BLAST search of [FLPDKAIDLIDEAGSR](#)

(Parameters: blastp, nr protein database, expect=20000, no filter, PAM30)

Other BLAST [web gateways](#)

#### All matches to this query

| Score | Mr(calc)  | Delta  | Sequence                         |
|-------|-----------|--------|----------------------------------|
| 44.8  | 1758.9152 | 0.0384 | <a href="#">FLPDKAIDIIDEAGSR</a> |
| 44.8  | 1758.9152 | 0.0384 | <a href="#">FLPDKAIDLIDEAGSR</a> |
| 44.8  | 1758.9152 | 0.0384 | <a href="#">FLPDKAIDLIDEGSAR</a> |
| 44.8  | 1758.9152 | 0.0384 | <a href="#">FLPDKAIDLLDEAGSR</a> |
| 20.4  | 1758.9152 | 0.0384 | <a href="#">FLPDKAIDLVDEAASR</a> |
| 20.4  | 1758.9152 | 0.0384 | <a href="#">FLPDKAIDLVDEASAR</a> |
| 20.4  | 1758.9152 | 0.0384 | <a href="#">FLPDKAIDLVDESAAR</a> |
| 20.4  | 1758.9152 | 0.0384 | <a href="#">FLPDKAIDVIDEASAR</a> |
| 20.4  | 1758.8822 | 0.0715 | <a href="#">MLPDKAIDLVDEAASR</a> |
| 17.3  | 1758.8114 | 0.1422 | <a href="#">FELEHFGDYQRYR</a>    |

Mascot: <http://www.matrixscience.com/>



# Mascot Search Results

Peptide View

Spot no 110

MS/MS Fragmentation of **GELQCIGATTLDEYRK**Found in **gi|18423214** in **NCBI**nr, ATP-dependent Clp protease ATP-binding subunit ClpC [Arabidopsis thaliana]

Match to Query 263: 1852.939724 from(1853.947000,1+) intensity(0.0000) index(25)

Title: Label: C9, Spot\_Id: 219804, Peak\_List\_Id: 226651, MSMS Job\_Run\_Id: 21852, Comment:

Data file C:\Documents and Settings\Administrator\Desktop\Farah-Garima 11May 2013\ppw\_C9\_136859938300.txt

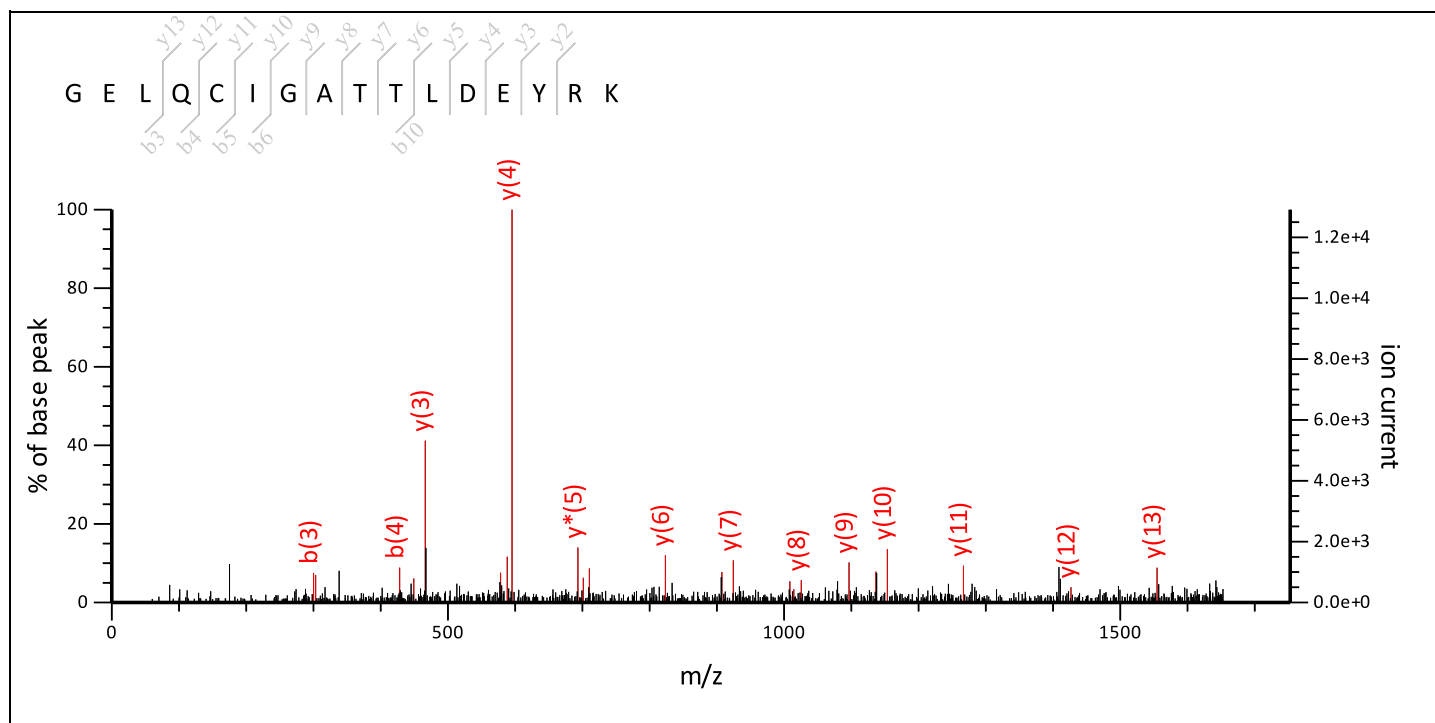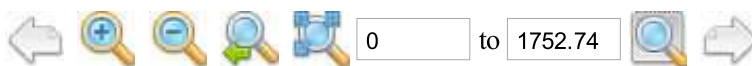Label all possible matches  Label matches used for scoring 

Monoisotopic mass of neutral peptide Mr(calc): 1852.8989

Fixed modifications: Carbamidomethyl (C) (apply to specified residues or termini only)

Ions Score: 72 Expect: 0.0019

Matches : 23/84 fragment ions using 48 most intense peaks ([help](#))

| # | a        | a*       | b        | b*       | Seq. | y         | y*        | #  |
|---|----------|----------|----------|----------|------|-----------|-----------|----|
| 1 | 30.0338  |          | 58.0287  |          | G    |           |           | 16 |
| 2 | 159.0764 |          | 187.0713 |          | E    | 1796.8847 | 1779.8582 | 15 |
| 3 | 272.1605 |          | 300.1554 |          | L    | 1667.8421 | 1650.8156 | 14 |
| 4 | 400.2191 | 383.1925 | 428.2140 | 411.1874 | Q    | 1554.7581 | 1537.7315 | 13 |
| 5 | 560.2497 | 543.2232 | 588.2446 | 571.2181 | C    | 1426.6995 | 1409.6729 | 12 |
| 6 | 673.3338 | 656.3072 | 701.3287 | 684.3021 | I    | 1266.6688 | 1249.6423 | 11 |
| 7 | 730.3552 | 713.3287 | 758.3502 | 741.3236 | G    | 1153.5848 | 1136.5582 | 10 |
| 8 | 801.3924 | 784.3658 | 829.3873 | 812.3607 | A    | 1096.5633 | 1079.5368 | 9  |

|    |           |           |           |           |   |           |           |   |
|----|-----------|-----------|-----------|-----------|---|-----------|-----------|---|
| 9  | 902.4400  | 885.4135  | 930.4349  | 913.4084  | T | 1025.5262 | 1008.4997 | 8 |
| 10 | 1003.4877 | 986.4612  | 1031.4826 | 1014.4561 | T | 924.4785  | 907.4520  | 7 |
| 11 | 1116.5718 | 1099.5452 | 1144.5667 | 1127.5401 | L | 823.4308  | 806.4043  | 6 |
| 12 | 1231.5987 | 1214.5722 | 1259.5936 | 1242.5671 | D | 710.3468  | 693.3202  | 5 |
| 13 | 1360.6413 | 1343.6148 | 1388.6362 | 1371.6097 | E | 595.3198  | 578.2933  | 4 |
| 14 | 1523.7046 | 1506.6781 | 1551.6996 | 1534.6730 | Y | 466.2772  | 449.2507  | 3 |
| 15 | 1679.8057 | 1662.7792 | 1707.8007 | 1690.7741 | R | 303.2139  | 286.1874  | 2 |
| 16 |           |           |           |           | K | 147.1128  | 130.0863  | 1 |

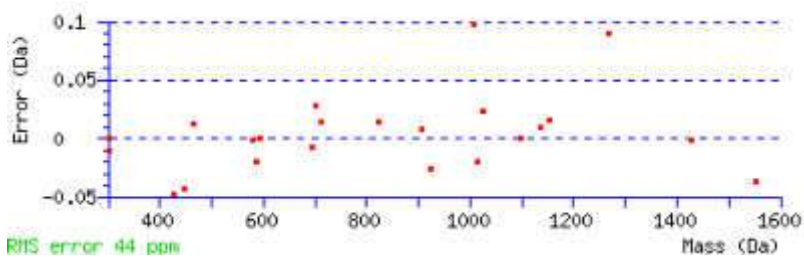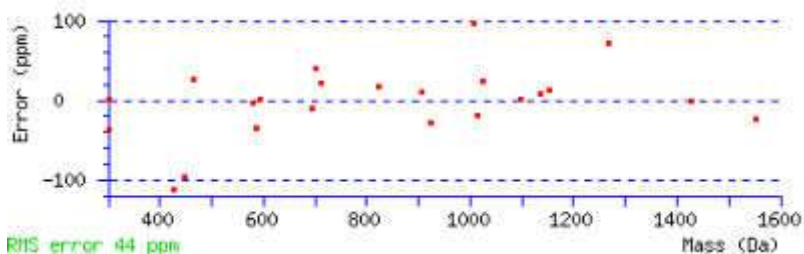

NCBI BLAST search of [GELQCIGATTLDEYRK](#)

(Parameters: blastp, nr protein database, expect=20000, no filter, PAM30)

Other BLAST [web gateways](#)

#### All matches to this query

| Score | Mr(calc)  | Delta  | Sequence                          |
|-------|-----------|--------|-----------------------------------|
| 84.7  | 1852.8989 | 0.0408 | <a href="#">GELQCLGATTLDEYKR</a>  |
| 71.7  | 1852.8989 | 0.0408 | <a href="#">GEIQCIGATTIDEYRK</a>  |
| 71.7  | 1852.8989 | 0.0408 | <a href="#">GEIQCIGATTLDEYRK</a>  |
| 71.7  | 1852.8989 | 0.0408 | <a href="#">GELQCIGATTIDEYRK</a>  |
| 71.7  | 1852.8989 | 0.0408 | <a href="#">GELQCIGATTLDEYRK</a>  |
| 71.7  | 1852.8989 | 0.0408 | <a href="#">GELQCLGATTIDEYRK</a>  |
| 71.7  | 1852.8989 | 0.0408 | <a href="#">GELQCLGATTLDEYRK</a>  |
| 66.5  | 1852.8737 | 0.0660 | <a href="#">GELQCIGATTNNEYRK</a>  |
| 57.8  | 1852.8989 | 0.0408 | <a href="#">GELQCLGATTVEEYRK</a>  |
| 23.4  | 1852.8228 | 0.1169 | <a href="#">GVGGIDSWGSDVEEQYR</a> |

Mascot: <http://www.matrixscience.com/>



# Mascot Search Results

## Peptide View Spot no 110

MS/MS Fragmentation of **NPNRPIASFIFSGPTGVGK**

Found in **gi|18423214** in **NCBI nr**, ATP-dependent Clp protease ATP-binding subunit ClpC [Arabidopsis thaliana]

Match to Query 274: 1958.077924 from(1959.085200,1+) intensity(0.0000) index(27)

Title: Label: C9, Spot\_Id: 219804, Peak\_List\_Id: 226648, MSMS Job\_Run\_Id: 21852, Comment:

Data file C:\Documents and Settings\Administrator\Desktop\Farah-Garima 11May 2013\ppw\_C9\_136859938300.txt

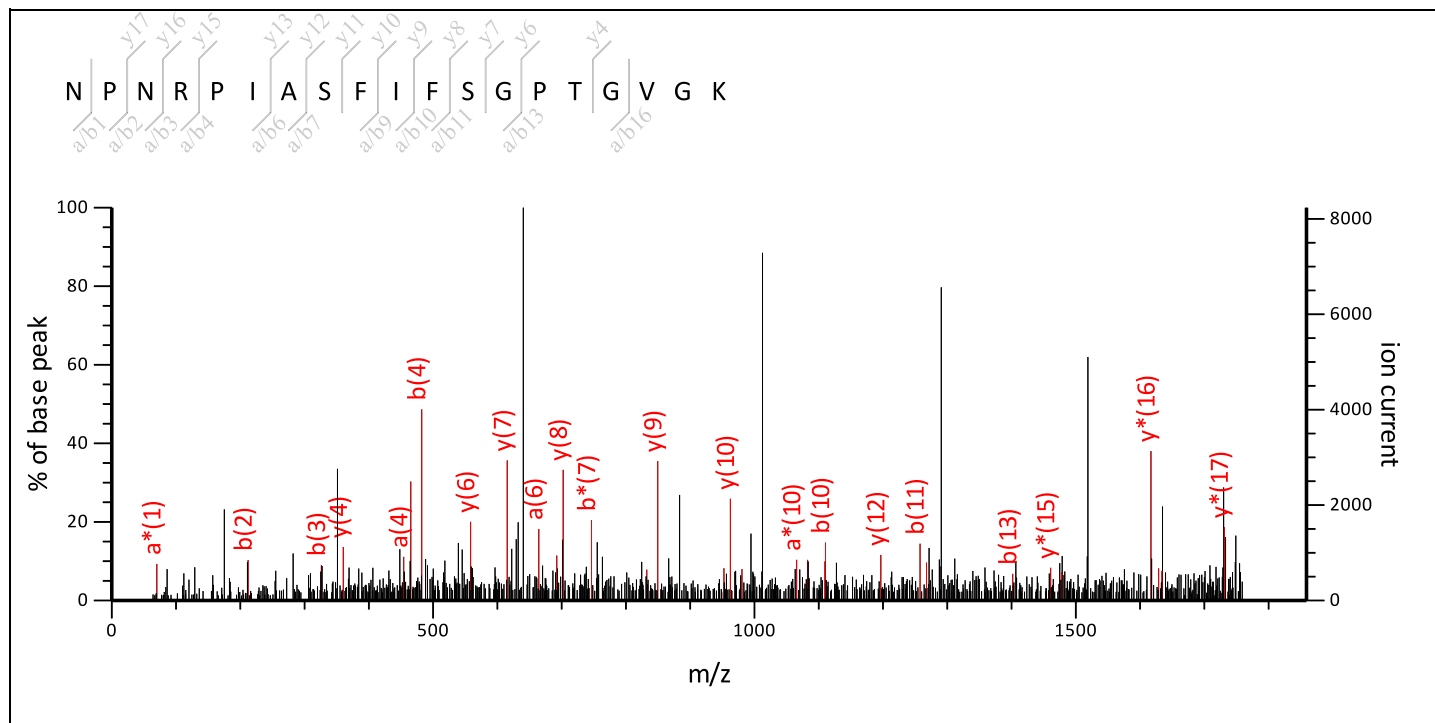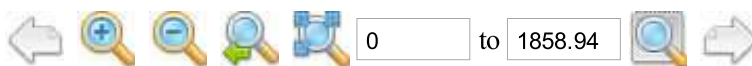

Label all possible matches  Label matches used for scoring

**Monoisotopic mass of neutral peptide Mr(calc):** 1958.0374

**Fixed modifications:** Carbamidomethyl (C) (apply to specified residues or termini only)

**Ions Score:** 31 **Expect:** 21

**Matches :** 32/108 fragment ions using 102 most intense peaks ([help](#))

| # | a        | a*       | b        | b*       | Seq. | y         | y*        | #  |
|---|----------|----------|----------|----------|------|-----------|-----------|----|
| 1 | 87.0553  | 70.0287  | 115.0502 | 98.0237  | N    |           |           | 19 |
| 2 | 184.1081 | 167.0815 | 212.1030 | 195.0764 | P    | 1845.0017 | 1827.9752 | 18 |
| 3 | 298.1510 | 281.1244 | 326.1459 | 309.1193 | N    | 1747.9490 | 1730.9224 | 17 |
| 4 | 454.2521 | 437.2255 | 482.2470 | 465.2205 | R    | 1633.9061 | 1616.8795 | 16 |
| 5 | 551.3049 | 534.2783 | 579.2998 | 562.2732 | P    | 1477.8049 | 1460.7784 | 15 |
| 6 | 664.3889 | 647.3624 | 692.3838 | 675.3573 | I    | 1380.7522 | 1363.7256 | 14 |
| 7 | 735.4260 | 718.3995 | 763.4209 | 746.3944 | A    | 1267.6681 | 1250.6416 | 13 |
| 8 | 822.4581 | 805.4315 | 850.4530 | 833.4264 | S    | 1196.6310 | 1179.6045 | 12 |

|    |           |           |           |           |   |           |           |    |
|----|-----------|-----------|-----------|-----------|---|-----------|-----------|----|
| 9  | 969.5265  | 952.4999  | 997.5214  | 980.4948  | F | 1109.5990 | 1092.5724 | 11 |
| 10 | 1082.6105 | 1065.5840 | 1110.6055 | 1093.5789 | I | 962.5306  | 945.5040  | 10 |
| 11 | 1229.6790 | 1212.6524 | 1257.6739 | 1240.6473 | F | 849.4465  | 832.4199  | 9  |
| 12 | 1316.7110 | 1299.6844 | 1344.7059 | 1327.6793 | S | 702.3781  | 685.3515  | 8  |
| 13 | 1373.7324 | 1356.7059 | 1401.7274 | 1384.7008 | G | 615.3461  | 598.3195  | 7  |
| 14 | 1470.7852 | 1453.7587 | 1498.7801 | 1481.7536 | P | 558.3246  | 541.2980  | 6  |
| 15 | 1571.8329 | 1554.8063 | 1599.8278 | 1582.8013 | T | 461.2718  | 444.2453  | 5  |
| 16 | 1628.8544 | 1611.8278 | 1656.8493 | 1639.8227 | G | 360.2241  | 343.1976  | 4  |
| 17 | 1727.9228 | 1710.8962 | 1755.9177 | 1738.8911 | V | 303.2027  | 286.1761  | 3  |
| 18 | 1784.9442 | 1767.9177 | 1812.9391 | 1795.9126 | G | 204.1343  | 187.1077  | 2  |
| 19 |           |           |           |           | K | 147.1128  | 130.0863  | 1  |

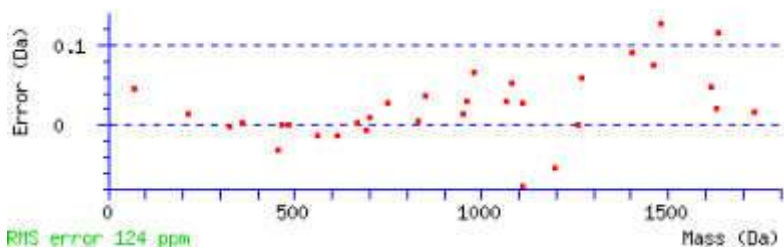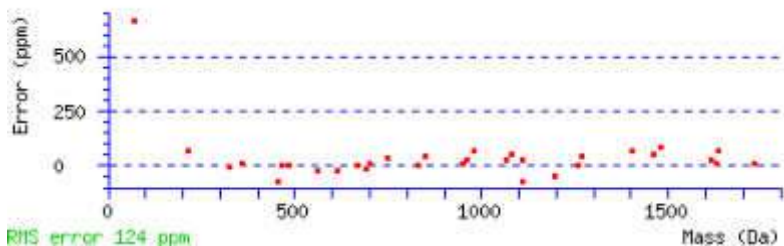

NCBI **BLAST** search of [NPNRPIASFIFSGPTGVGK](#)

(Parameters: blastp, nr protein database, expect=20000, no filter, PAM30)

Other BLAST [web gateways](#)

#### All matches to this query

| Score | Mr(calc)  | Delta  | Sequence                            |
|-------|-----------|--------|-------------------------------------|
| 30.5  | 1958.0374 | 0.0405 | <a href="#">NPNRPIASFIFSGPTGVGK</a> |
| 30.5  | 1958.0374 | 0.0405 | <a href="#">NPNRPIASFIFSGPTGVGK</a> |
| 14.2  | 1957.9001 | 0.1778 | <a href="#">FHYKICFNMPDIAMR</a>     |
| 12.8  | 1957.9646 | 0.1133 | <a href="#">TQIENYDFVFGQSRVR</a>    |
| 10.6  | 1958.0594 | 0.0186 | <a href="#">AGTLRVAAMPAMAIGFLPR</a> |
| 10.6  | 1958.0594 | 0.0186 | <a href="#">AGTLRVAAMPAMAIGFLPR</a> |
| 9.8   | 1957.9785 | 0.0994 | <a href="#">TQLDVVYQEFLVYADR</a>    |
| 9.5   | 1957.9381 | 0.1398 | <a href="#">GATIYAELAGEGNSLSSYR</a> |
| 8.6   | 1957.8873 | 0.1906 | <a href="#">TISANMAPDEFTQKSMR</a>   |
| 8.4   | 1957.9857 | 0.0922 | <a href="#">DNLTEEEQRVLALWSR</a>    |

Mascot: <http://www.matrixscience.com/>





# Mascot Search Results

## Peptide View Spot no 110

MS/MS Fragmentation of **QLGHNYIGSEHLLGLLR**

Found in **gi|18423214** in **NCBI nr**, ATP-dependent Clp protease ATP-binding subunit ClpC [Arabidopsis thaliana]

Match to Query 280: 2032.161224 from(2033.168500,1+) intensity(0.0000) index(29)

Title: Label: C9, Spot\_Id: 219804, Peak\_List\_Id: 226666, MSMS Job\_Run\_Id: 21852, Comment:

Data file C:\Documents and Settings\Administrator\Desktop\Farah-Garima 11May 2013\ppw\_C9\_136859938300.txt

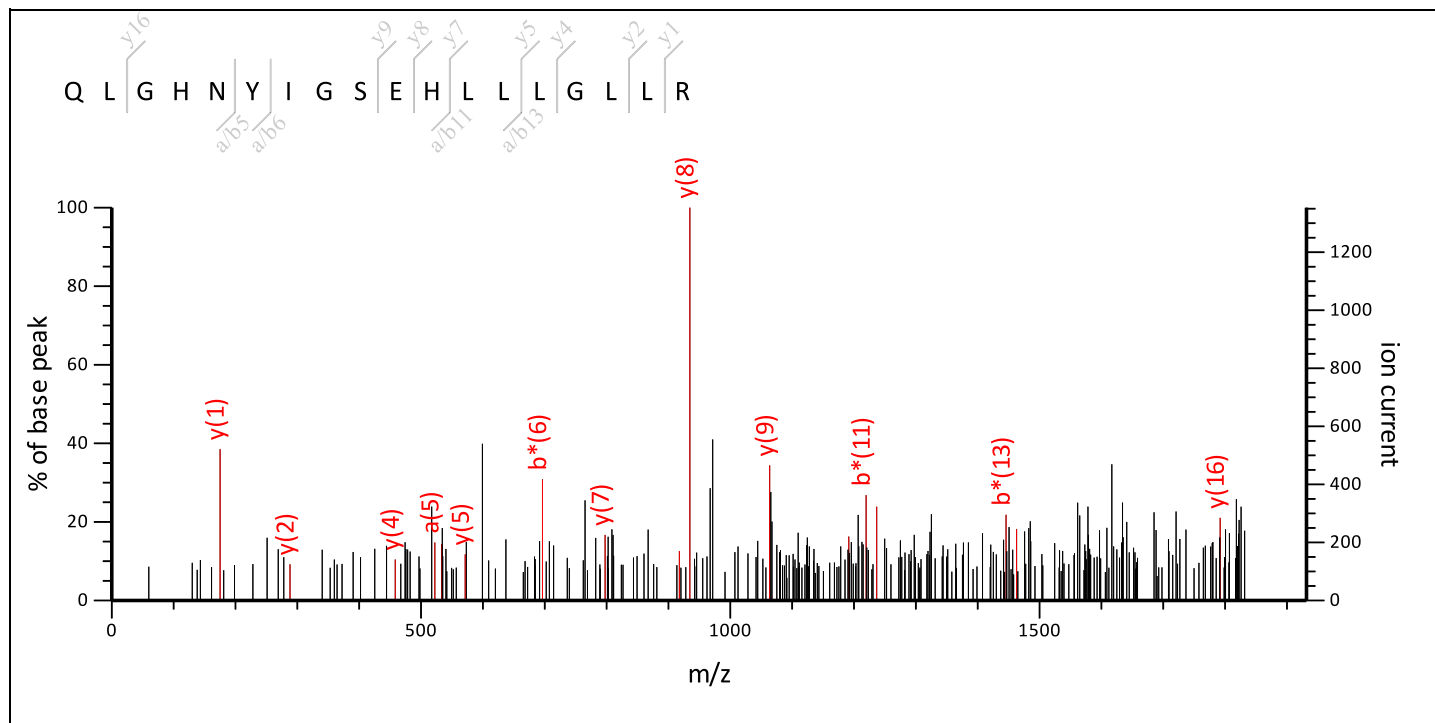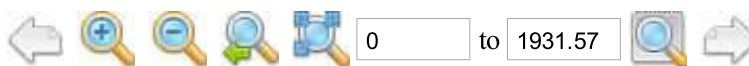

Label all possible matches  Label matches used for scoring

**Monoisotopic mass of neutral peptide Mr(calc):** 2032.1218

**Fixed modifications:** Carbamidomethyl (C) (apply to specified residues or termini only)

**Ions Score:** 5 **Expect:** 6.8e+03

**Matches:** 17/102 fragment ions using 89 most intense peaks ([help](#))

| # | a               | a*       | b        | b*              | Seq. | y                | y*        | #  |
|---|-----------------|----------|----------|-----------------|------|------------------|-----------|----|
| 1 | 101.0709        | 84.0444  | 129.0659 | 112.0393        | Q    |                  |           | 18 |
| 2 | 214.1550        | 197.1285 | 242.1499 | 225.1234        | L    | 1905.0705        | 1888.0439 | 17 |
| 3 | 271.1765        | 254.1499 | 299.1714 | 282.1448        | G    | <b>1791.9864</b> | 1774.9599 | 16 |
| 4 | 408.2354        | 391.2088 | 436.2303 | 419.2037        | H    | 1734.9650        | 1717.9384 | 15 |
| 5 | <b>522.2783</b> | 505.2518 | 550.2732 | <b>533.2467</b> | N    | 1597.9061        | 1580.8795 | 14 |
| 6 | 685.3416        | 668.3151 | 713.3365 | <b>696.3100</b> | Y    | 1483.8631        | 1466.8366 | 13 |
| 7 | 798.4257        | 781.3991 | 826.4206 | 809.3941        | I    | 1320.7998        | 1303.7732 | 12 |
| 8 | 855.4472        | 838.4206 | 883.4421 | 866.4155        | G    | 1207.7157        | 1190.6892 | 11 |

|    |           |                  |                  |                  |   |                  |                 |    |
|----|-----------|------------------|------------------|------------------|---|------------------|-----------------|----|
| 9  | 942.4792  | 925.4526         | 970.4741         | 953.4476         | S | 1150.6943        | 1133.6677       | 10 |
| 10 | 1071.5218 | 1054.4952        | 1099.5167        | 1082.4902        | E | <b>1063.6622</b> | 1046.6357       | 9  |
| 11 | 1208.5807 | <b>1191.5541</b> | <b>1236.5756</b> | <b>1219.5491</b> | H | <b>934.6196</b>  | <b>917.5931</b> | 8  |
| 12 | 1321.6648 | 1304.6382        | 1349.6597        | 1332.6331        | L | <b>797.5607</b>  | 780.5342        | 7  |
| 13 | 1434.7488 | 1417.7223        | <b>1462.7437</b> | <b>1445.7172</b> | L | 684.4767         | 667.4501        | 6  |
| 14 | 1547.8329 | 1530.8063        | 1575.8278        | 1558.8013        | L | <b>571.3926</b>  | 554.3661        | 5  |
| 15 | 1604.8544 | 1587.8278        | 1632.8493        | 1615.8227        | G | <b>458.3085</b>  | 441.2820        | 4  |
| 16 | 1717.9384 | 1700.9119        | 1745.9333        | 1728.9068        | L | 401.2871         | 384.2605        | 3  |
| 17 | 1831.0225 | 1813.9959        | 1859.0174        | 1841.9908        | L | <b>288.2030</b>  | 271.1765        | 2  |
| 18 |           |                  |                  |                  | R | <b>175.1190</b>  | 158.0924        | 1  |

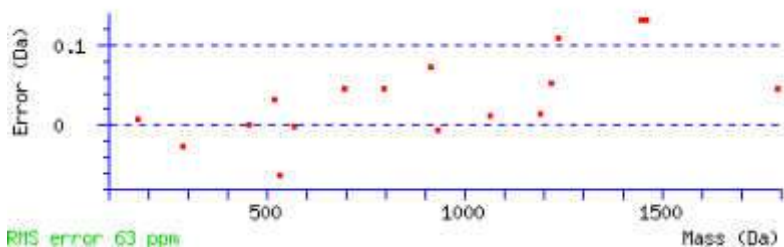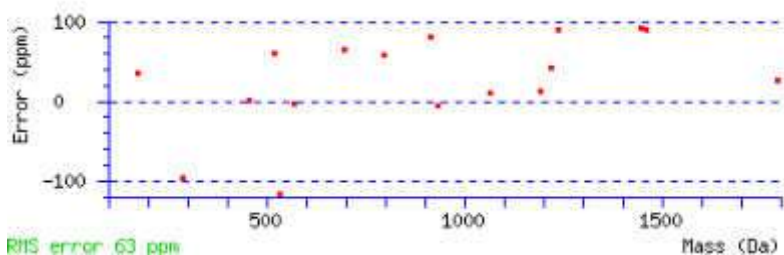

NCBI **BLAST** search of [QLGHNYIGSEHLLLGLLR](#)

(Parameters: blastp, nr protein database, expect=20000, no filter, PAM30)

Other BLAST [web gateways](#)

#### All matches to this query

| Score | Mr(calc)  | Delta  | Sequence                             |
|-------|-----------|--------|--------------------------------------|
| 4.6   | 2032.1582 | 0.0031 | <a href="#">KLGHNYPVTEHILLGLIR</a>   |
| 4.6   | 2032.1218 | 0.0395 | <a href="#">QLGHNYIGSEHLLLGLLR</a>   |
| 4.6   | 2032.1218 | 0.0394 | <a href="#">QLGHNYVGTETLLLGLIR</a>   |
| 4.0   | 2032.0313 | 0.1300 | <a href="#">FYMSATPRNHVPTAAVVR</a>   |
| 2.0   | 2032.1470 | 0.0143 | <a href="#">GIFVLQIRIGDLVGYIDVR</a>  |
| 0.7   | 2032.0888 | 0.0724 | <a href="#">VMGLPLPRISDLAHGADVR</a>  |
| 0.6   | 2032.0663 | 0.0949 | <a href="#">AVFVSMPDLSPLLTAVNR</a>   |
| 0.4   | 2031.9644 | 0.1969 | <a href="#">AAQNTLSSPTQMLNSSPGGR</a> |
| 0.3   | 2031.9585 | 0.2027 | <a href="#">NTPMHIYAGNGNFVGDGIR</a>  |
| 0.1   | 2032.0272 | 0.1340 | <a href="#">LAQCPGPHTSATAPERLR</a>   |

Mascot: <http://www.matrixscience.com/>



# Mascot Search Results

## Peptide View Spot no 110

MS/MS Fragmentation of **LIGSPPGYVGYTEGGQLTEAVR**

Found in **gi|18423214** in **NCBI**nr, ATP-dependent Clp protease ATP-binding subunit ClpC [Arabidopsis thaliana]

Match to Query 295: 2263.184624 from(2264.191900,1+) intensity(0.0000) index(32)

Title: Label: C9, Spot\_Id: 219804, Peak\_List\_Id: 226650, MSMS Job\_Run\_Id: 21852, Comment:

Data file C:\Documents and Settings\Administrator\Desktop\Farah-Garima 11May 2013\ppw\_C9\_136859938300.txt

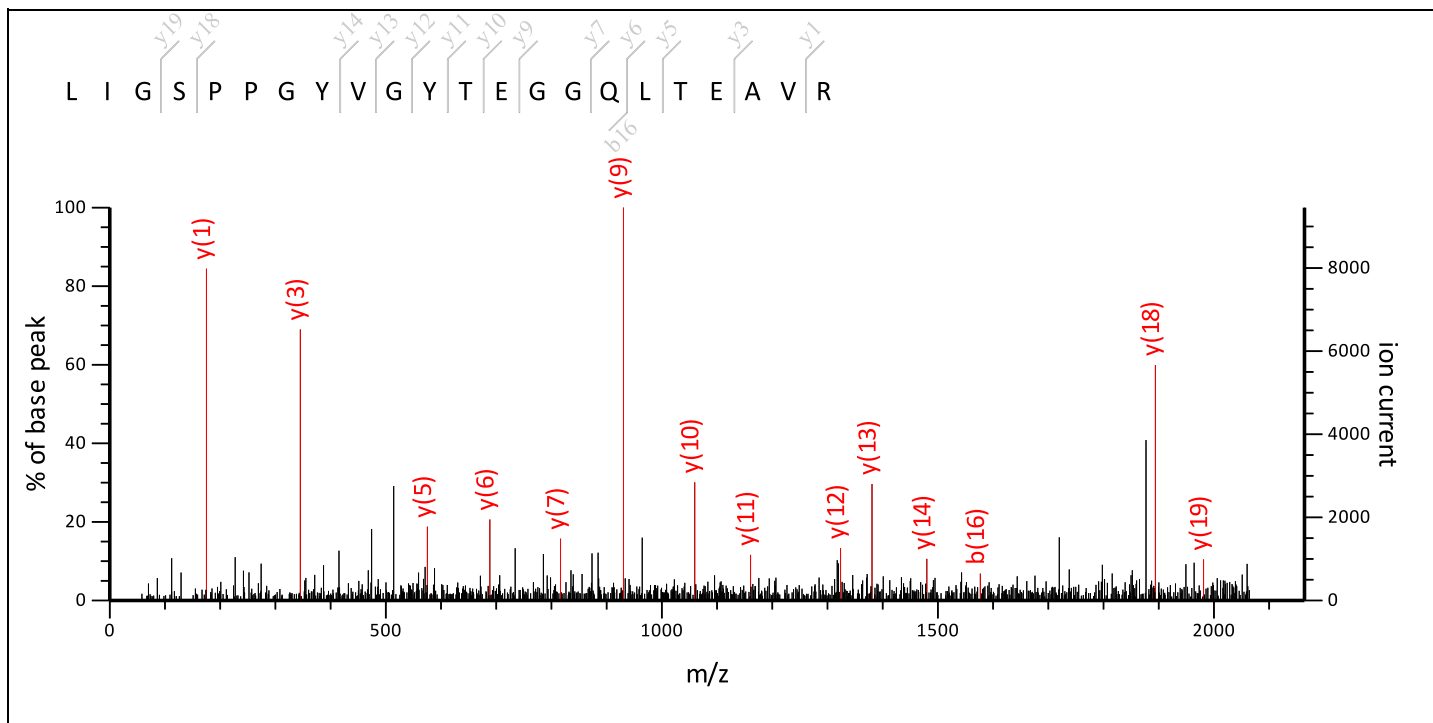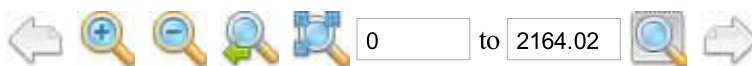

Label all possible matches  Label matches used for scoring

**Monoisotopic mass of neutral peptide Mr(calc):** 2263.1485

**Fixed modifications:** Carbamidomethyl (C) (apply to specified residues or termini only)

**Ions Score:** 98 **Expect:** 3.7e-06

**Matches :** 14/96 fragment ions using 21 most intense peaks ([help](#))

| # | a        | a* | b        | b* | Seq. | y                | y*        | #  |
|---|----------|----|----------|----|------|------------------|-----------|----|
| 1 | 86.0964  |    | 114.0913 |    | L    |                  |           | 22 |
| 2 | 199.1805 |    | 227.1754 |    | I    | 2151.0717        | 2134.0451 | 21 |
| 3 | 256.2020 |    | 284.1969 |    | G    | 2037.9876        | 2020.9611 | 20 |
| 4 | 343.2340 |    | 371.2289 |    | S    | <b>1980.9662</b> | 1963.9396 | 19 |
| 5 | 440.2867 |    | 468.2817 |    | P    | <b>1893.9341</b> | 1876.9076 | 18 |
| 6 | 537.3395 |    | 565.3344 |    | P    | 1796.8814        | 1779.8548 | 17 |
| 7 | 594.3610 |    | 622.3559 |    | G    | 1699.8286        | 1682.8020 | 16 |
| 8 | 757.4243 |    | 785.4192 |    | Y    | 1642.8071        | 1625.7806 | 15 |

|    |           |           |                  |           |   |                  |           |          |   |
|----|-----------|-----------|------------------|-----------|---|------------------|-----------|----------|---|
| 9  | 856.4927  |           | 884.4876         |           | V | <b>1479.7438</b> | 1462.7173 | 14       |   |
| 10 | 913.5142  |           | 941.5091         |           | G | <b>1380.6754</b> | 1363.6488 | 13       |   |
| 11 | 1076.5775 |           | 1104.5724        |           | Y | <b>1323.6539</b> | 1306.6274 | 12       |   |
| 12 | 1177.6252 |           | 1205.6201        |           | T | <b>1160.5906</b> | 1143.5640 | 11       |   |
| 13 | 1306.6678 |           | 1334.6627        |           | E | <b>1059.5429</b> | 1042.5164 | 10       |   |
| 14 | 1363.6892 |           | 1391.6842        |           | G | <b>930.5003</b>  | 913.4738  | 9        |   |
| 15 | 1420.7107 |           | 1448.7056        |           | G |                  | 873.4789  | 856.4523 | 8 |
| 16 | 1548.7693 | 1531.7427 | <b>1576.7642</b> | 1559.7377 | Q | <b>816.4574</b>  | 799.4308  | 7        |   |
| 17 | 1661.8534 | 1644.8268 | 1689.8483        | 1672.8217 | L | <b>688.3988</b>  | 671.3723  | 6        |   |
| 18 | 1762.9010 | 1745.8745 | 1790.8959        | 1773.8694 | T | <b>575.3148</b>  | 558.2882  | 5        |   |
| 19 | 1891.9436 | 1874.9171 | 1919.9385        | 1902.9120 | E |                  | 474.2671  | 457.2405 | 4 |
| 20 | 1962.9807 | 1945.9542 | 1990.9757        | 1973.9491 | A | <b>345.2245</b>  | 328.1979  | 3        |   |
| 21 | 2062.0492 | 2045.0226 | 2090.0441        | 2073.0175 | V |                  | 274.1874  | 257.1608 | 2 |
| 22 |           |           |                  |           | R | <b>175.1190</b>  | 158.0924  | 1        |   |

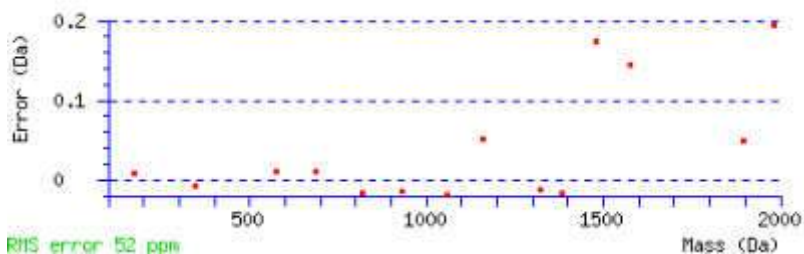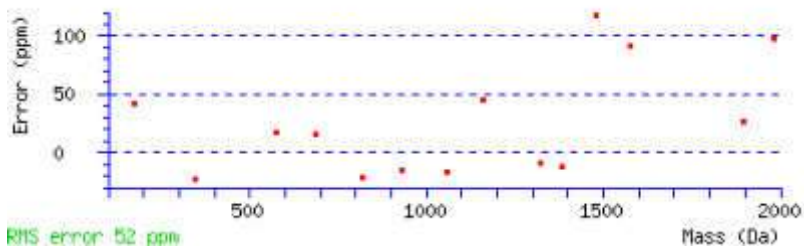

NCBI **BLAST** search of [LIGSPPGYVGYTEGGQLTEAVR](#)

(Parameters: blastp, nr protein database, expect=20000, no filter, PAM30)

Other BLAST [web gateways](#)

#### All matches to this query

| Score | Mr(calc)  | Delta  | Sequence                               |
|-------|-----------|--------|----------------------------------------|
| 97.9  | 2263.1485 | 0.0362 | <a href="#">LIGSPPGYVGYTEGGQLTEAVR</a> |
| 58.0  | 2263.1121 | 0.0725 | <a href="#">LIGSPPGYVGYDDGGQLTEAVR</a> |
| 58.0  | 2263.1485 | 0.0362 | <a href="#">LIGSPPGYIGYSEGGQLTEAVR</a> |
| 33.5  | 2263.1484 | 0.0362 | <a href="#">LIGAAPGYIGYEEGGQLTEAVR</a> |
| 33.5  | 2263.1597 | 0.0249 | <a href="#">LIGAPPGYIGHEEGGQLTEAVR</a> |
| 33.5  | 2263.1485 | 0.0362 | <a href="#">LIGTAPGFVGYEEGGQLTEAVR</a> |
| 23.1  | 2263.1121 | 0.0725 | <a href="#">LVGSPPGYVGYDEGGQLTEAVR</a> |
| 16.6  | 2263.1484 | 0.0362 | <a href="#">LIGAPAGYIGYDEAGQLTEAVR</a> |
| 16.6  | 2263.1484 | 0.0362 | <a href="#">LIGAPAGYVGYEEAGQLTEAVR</a> |

|      |           |        |                                        |
|------|-----------|--------|----------------------------------------|
| 16.6 | 2263.1597 | 0.0249 | <a href="#">LIGAPPGYVGHEEAGQLTEAVR</a> |
|------|-----------|--------|----------------------------------------|

|                                                                                          |
|------------------------------------------------------------------------------------------|
| <b>Mascot:</b> <a href="http://www.matrixscience.com/">http://www.matrixscience.com/</a> |
|------------------------------------------------------------------------------------------|



# Mascot Search Results

## Peptide View Spot no 110

MS/MS Fragmentation of **YTDESLVAAAQLSYQYISDR**

Found in **gi|18423214** in **NCBI nr**, ATP-dependent Clp protease ATP-binding subunit ClpC [Arabidopsis thaliana]

Match to Query 300: 2292.128924 from(2293.136200,1+) intensity(0.0000) index(33)

Title: Label: C9, Spot\_Id: 219804, Peak\_List\_Id: 226656, MSMS Job\_Run\_Id: 21852, Comment:

Data file C:\Documents and Settings\Administrator\Desktop\Farah-Garima 11May 2013\ppw\_C9\_136859938300.txt

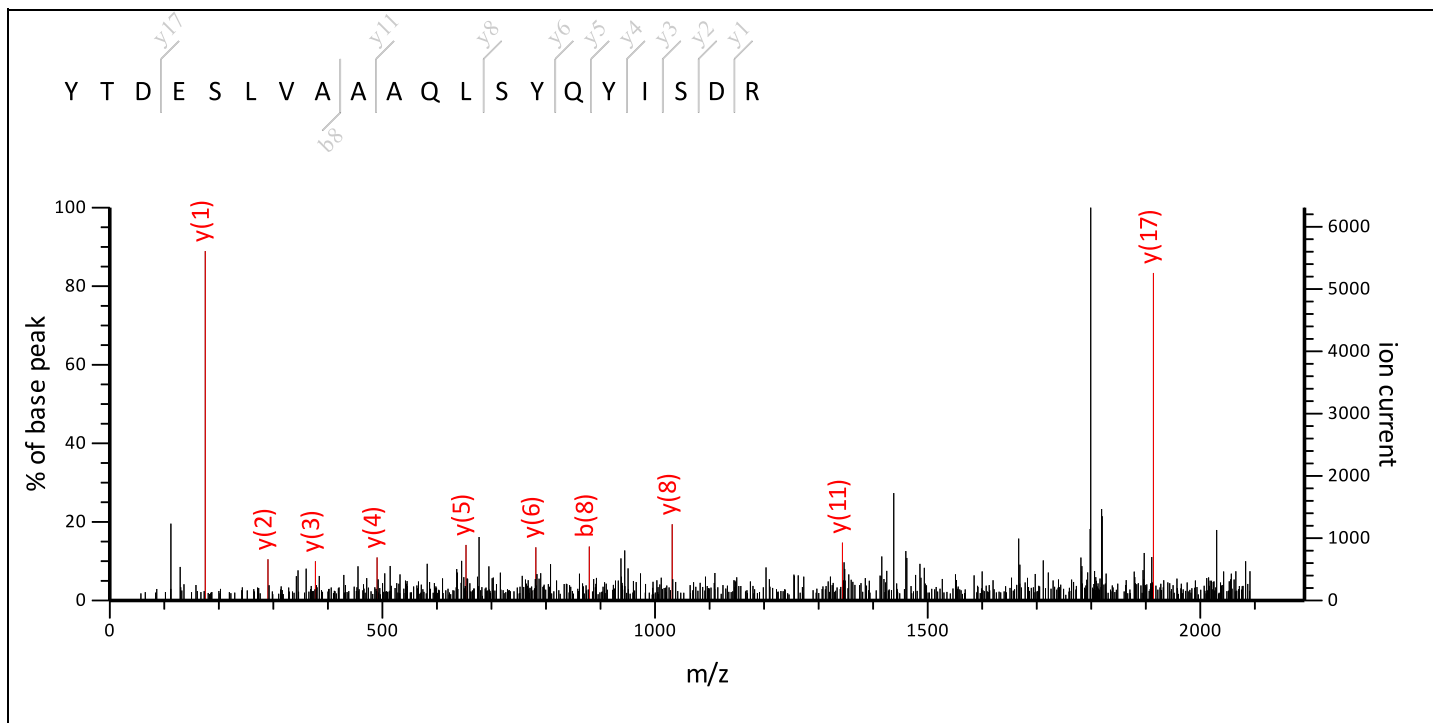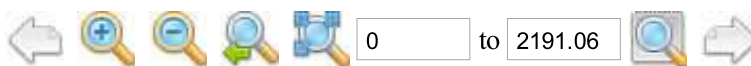

Label all possible matches  Label matches used for scoring

**Monoisotopic mass of neutral peptide Mr(calc):** 2292.0910

**Fixed modifications:** Carbamidomethyl (C) (apply to specified residues or termini only)

**Ions Score:** 43 **Expect:** 1.2

**Matches :** 10/94 fragment ions using 21 most intense peaks ([help](#))

| # | a        | a* | b               | b* | Seq. | y                | y*        | #  |
|---|----------|----|-----------------|----|------|------------------|-----------|----|
| 1 | 136.0757 |    | 164.0706        |    | Y    |                  |           | 20 |
| 2 | 237.1234 |    | 265.1183        |    | T    | 2130.0350        | 2113.0084 | 19 |
| 3 | 352.1503 |    | 380.1452        |    | D    | 2028.9873        | 2011.9607 | 18 |
| 4 | 481.1929 |    | 509.1878        |    | E    | <b>1913.9603</b> | 1896.9338 | 17 |
| 5 | 568.2249 |    | 596.2198        |    | S    | 1784.9177        | 1767.8912 | 16 |
| 6 | 681.3090 |    | 709.3039        |    | L    | 1697.8857        | 1680.8592 | 15 |
| 7 | 780.3774 |    | 808.3723        |    | V    | 1584.8016        | 1567.7751 | 14 |
| 8 | 851.4145 |    | <b>879.4094</b> |    | A    | 1485.7332        | 1468.7067 | 13 |

|    |           |           |           |           |   |                  |           |    |
|----|-----------|-----------|-----------|-----------|---|------------------|-----------|----|
| 9  | 922.4516  |           | 950.4466  |           | A | 1414.6961        | 1397.6696 | 12 |
| 10 | 993.4888  |           | 1021.4837 |           | A | <b>1343.6590</b> | 1326.6325 | 11 |
| 11 | 1121.5473 | 1104.5208 | 1149.5422 | 1132.5157 | Q | 1272.6219        | 1255.5953 | 10 |
| 12 | 1234.6314 | 1217.6048 | 1262.6263 | 1245.5998 | L | 1144.5633        | 1127.5368 | 9  |
| 13 | 1321.6634 | 1304.6369 | 1349.6583 | 1332.6318 | S | <b>1031.4793</b> | 1014.4527 | 8  |
| 14 | 1484.7268 | 1467.7002 | 1512.7217 | 1495.6951 | Y | 944.4472         | 927.4207  | 7  |
| 15 | 1612.7853 | 1595.7588 | 1640.7802 | 1623.7537 | Q | <b>781.3839</b>  | 764.3573  | 6  |
| 16 | 1775.8487 | 1758.8221 | 1803.8436 | 1786.8170 | Y | <b>653.3253</b>  | 636.2988  | 5  |
| 17 | 1888.9327 | 1871.9062 | 1916.9276 | 1899.9011 | I | <b>490.2620</b>  | 473.2354  | 4  |
| 18 | 1975.9648 | 1958.9382 | 2003.9597 | 1986.9331 | S | <b>377.1779</b>  | 360.1514  | 3  |
| 19 | 2090.9917 | 2073.9651 | 2118.9866 | 2101.9601 | D | <b>290.1459</b>  | 273.1193  | 2  |
| 20 |           |           |           |           | R | <b>175.1190</b>  | 158.0924  | 1  |

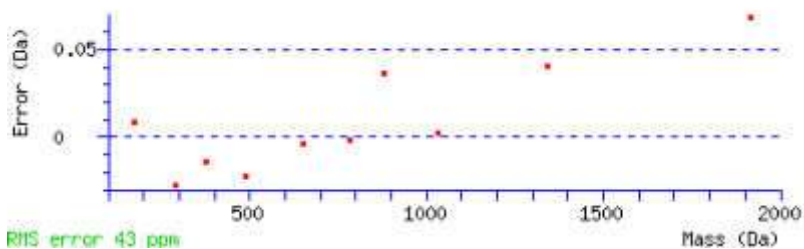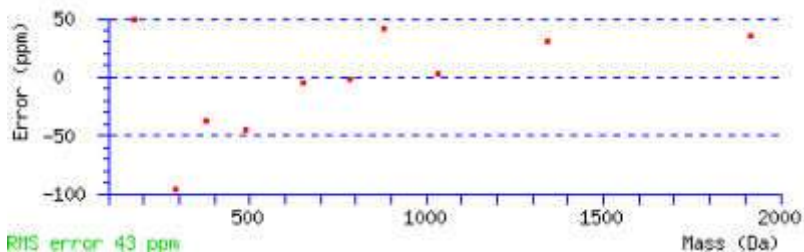

NCBI **BLAST** search of [YTDESLVAAAQLSYQYISDR](#)

(Parameters: blastp, nr protein database, expect=20000, no filter, PAM30)

Other BLAST [web gateways](#)

#### All matches to this query

| Score | Mr(calc)  | Delta   | Sequence                                |
|-------|-----------|---------|-----------------------------------------|
| 58.5  | 2292.1274 | 0.0016  | <a href="#">YTDDSLIAAAKLSYQYISDR</a>    |
| 58.5  | 2292.0910 | 0.0380  | <a href="#">YTDDSLIAAAQLSYQYISDR</a>    |
| 56.0  | 2292.1274 | 0.0016  | <a href="#">YTDDALISAAKLSYQYISDR</a>    |
| 42.7  | 2292.0910 | 0.0380  | <a href="#">YTDEALVSAAQLSYQYISDR</a>    |
| 42.7  | 2292.0910 | 0.0380  | <a href="#">YTDESLVAAAQLSYQYISDR</a>    |
| 12.1  | 2292.0830 | 0.0460  | <a href="#">VDR TISAIENVDTDSGATASDR</a> |
| 11.9  | 2292.1249 | 0.0041  | <a href="#">FYDPIQALNTMFAKYISDR</a>     |
| 10.3  | 2292.0991 | 0.0299  | <a href="#">QNVINIDHTYSVEAMMKAGR</a>    |
| 9.0   | 2292.2161 | -0.0872 | <a href="#">VHPPVPPPPTAAPRTTNMQIR</a>   |
| 8.6   | 2292.1168 | 0.0121  | <a href="#">EVSIVPROAQGLSMQEYADR</a>    |







# Mascot Search Results

## Peptide View Spot no 112

### MS/MS Fragmentation of **NPYWFR**

Found in **gi|28190676** in **NCBI nr**, putative transketolase [Oryza sativa Japonica Group]

Match to Query 41: 995.498884 from(996.506160,1+) intensity(0.0000) index(4)

Title: Label: E1, Spot\_Id: 219678, Peak\_List\_Id: 224896, MSMS Job\_Run\_Id: 21757, Comment:

Data file C:\Documents and Settings\Administrator\Desktop\farah BHU\spot set plate\Farah-Garima 11May 2013\ppw\_E1\_136842029000.txt

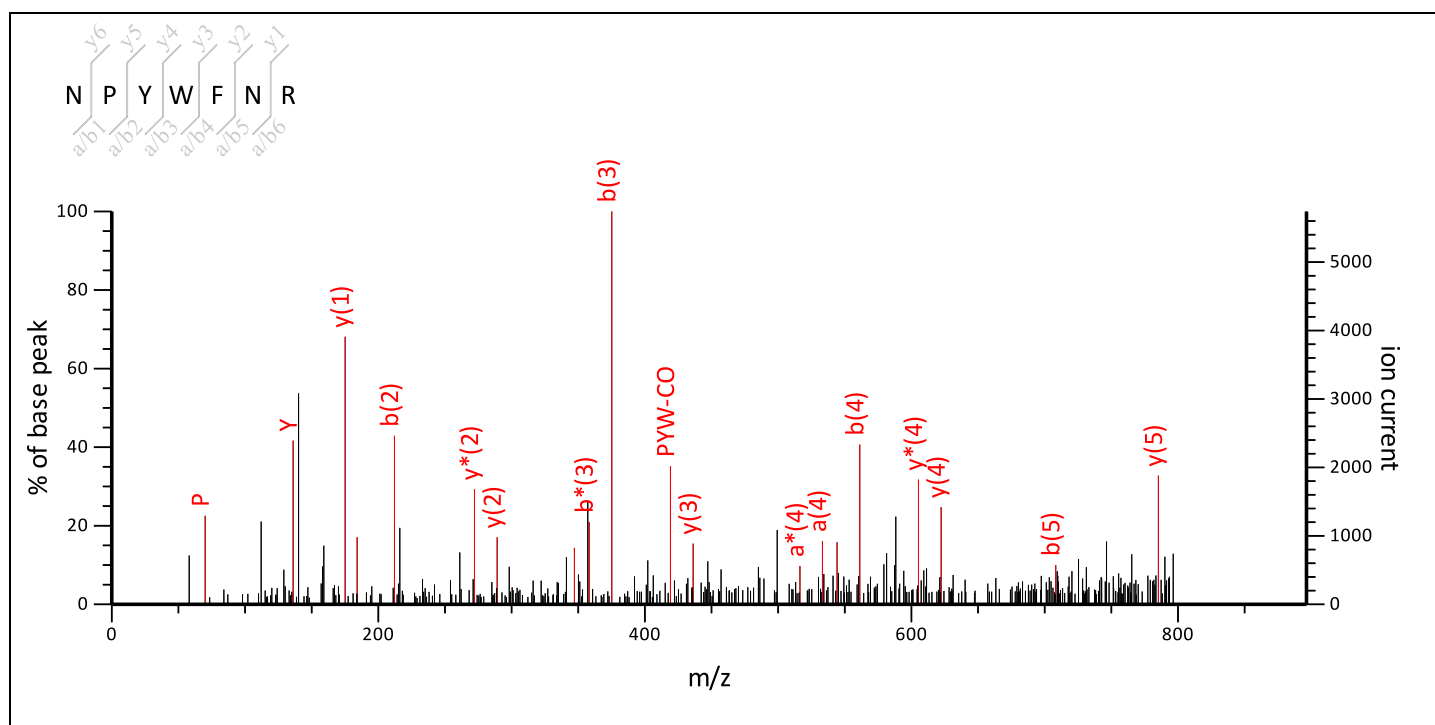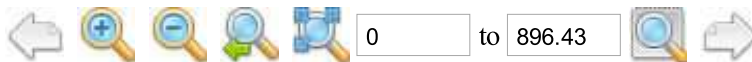

Label all possible matches  Label matches used for scoring

**Monoisotopic mass of neutral peptide Mr(calc):** 995.4613

**Fixed modifications:** Carbamidomethyl (C) (apply to specified residues or termini only)

**Ions Score:** 29 **Expect:** 2.2

**Matches:** 22/74 fragment ions using 32 most intense peaks ([help](#))

| # | Immon.   | a        | a*       | b        | b*       | d        | Seq. | v        | w        | y        | y*       | # |
|---|----------|----------|----------|----------|----------|----------|------|----------|----------|----------|----------|---|
| 1 | 87.0553  | 87.0553  | 70.0287  | 115.0502 | 98.0237  | 44.0495  | N    |          |          |          |          | 7 |
| 2 | 70.0651  | 184.1081 | 167.0815 | 212.1030 | 195.0764 | 158.0924 | P    | 840.3787 | 839.3835 | 882.4257 | 865.3992 | 6 |
| 3 | 136.0757 | 347.1714 | 330.1448 | 375.1663 | 358.1397 |          | Y    | 677.3154 |          | 785.3729 | 768.3464 | 5 |
| 4 | 159.0917 | 533.2507 | 516.2241 | 561.2456 | 544.2191 |          | W    | 491.2361 |          | 622.3096 | 605.2831 | 4 |
| 5 | 120.0808 | 680.3191 | 663.2926 | 708.3140 | 691.2875 |          | F    | 344.1677 |          | 436.2303 | 419.2037 | 3 |
| 6 | 87.0553  | 794.3620 | 777.3355 | 822.3569 | 805.3304 | 751.3562 | N    | 230.1248 | 229.1295 | 289.1619 | 272.1353 | 2 |
| 7 | 129.1135 |          |          |          |          |          | R    | 74.0237  | 73.0284  | 175.1190 | 158.0924 | 1 |

| Seq   | ya       | yb       | Seq | ya       | yb       | Seq  | ya       | yb       |
|-------|----------|----------|-----|----------|----------|------|----------|----------|
| PY    | 233.1285 | 261.1234 | PYW | 419.2078 | 447.2027 | PYWF | 566.2762 | 594.2711 |
| PYWFN | 680.3191 | 708.3140 | YW  | 322.1550 | 350.1499 | YWF  | 469.2234 | 497.2183 |
| YWFN  | 583.2663 | 611.2613 | WF  | 306.1601 | 334.1550 | WFN  | 420.2030 | 448.1979 |
| FN    | 234.1237 | 262.1186 |     |          |          |      |          |          |

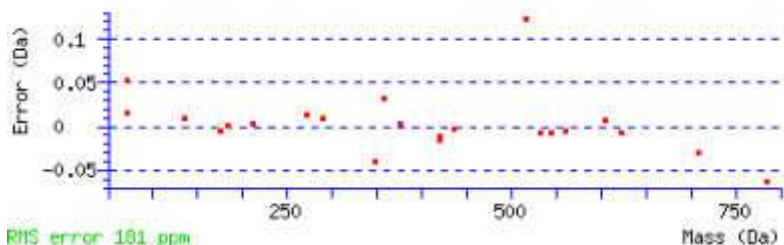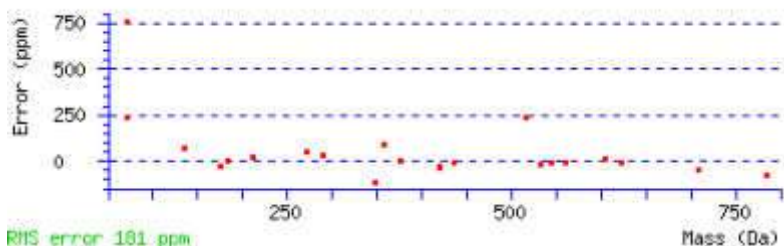

NCBI **BLAST** search of [NPYWFNR](#)

(Parameters: blastp, nr protein database, expect=20000, no filter, PAM30)

Other BLAST [web gateways](#)

#### All matches to this query

| Score | Mr(calc) | Delta   | Sequence                   |
|-------|----------|---------|----------------------------|
| 29.4  | 995.4613 | 0.0376  | <a href="#">NPYWFNR</a>    |
| 16.4  | 995.4825 | 0.0164  | <a href="#">VGSGYPFNR</a>  |
| 16.0  | 995.5036 | -0.0047 | <a href="#">GVPSGTEPPR</a> |
| 15.3  | 995.5261 | -0.0272 | <a href="#">SLSSGRHPR</a>  |
| 14.9  | 995.4494 | 0.0494  | <a href="#">ISAECFNR</a>   |
| 14.9  | 995.4436 | 0.0553  | <a href="#">WGWMFNR</a>    |
| 14.7  | 995.5876 | -0.0887 | <a href="#">HGLKVLSR</a>   |
| 14.5  | 995.4573 | 0.0416  | <a href="#">RGYSDWGR</a>   |
| 14.3  | 995.4494 | 0.0495  | <a href="#">FNAMAAAER</a>  |
| 14.0  | 995.4421 | 0.0568  | <a href="#">DRDSSFGGR</a>  |

Mascot: <http://www.matrixscience.com/>



# Mascot Search Results

## Peptide View

### MS/MS Fragmentation of **KRPSVLALSR**

Found in [gi|28190676](#) in [NCBI nr](#), putative transketolase [*Oryza sativa Japonica Group*]

Match to Query 75: 1125.736224 from(1126.743500,1+) intensity(0.0000) index(6)

Title: Label: E1, Spot\_Id: 219678, Peak\_List\_Id: 224900, MSMS Job\_Run\_Id: 21757, Comment:

Data file C:\Documents and Settings\Administrator\Desktop\farah BHU\spot set plate\Farah-Garima 11May 2013\ppw\_E1\_136842029000.txt

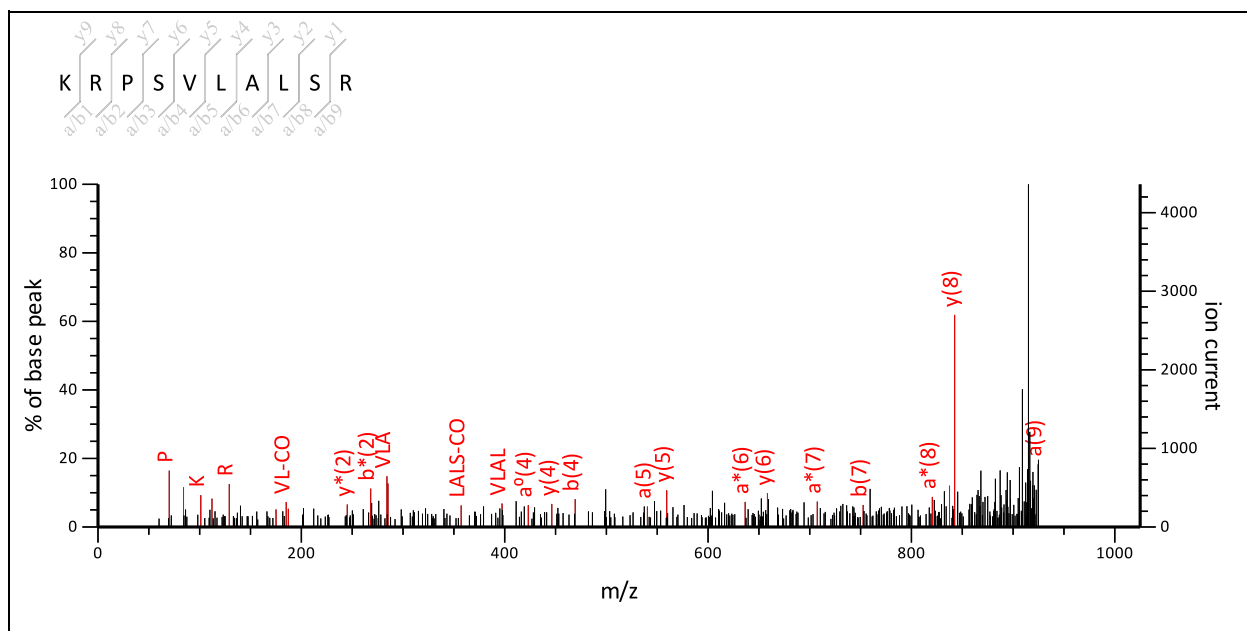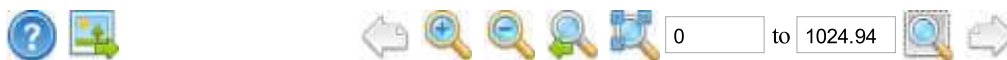

Label all possible matches  Label matches used for scoring

**Monoisotopic mass of neutral peptide Mr(calc):** 1125.6982

**Fixed modifications:** Carbamidomethyl (C) (apply to specified residues or termini only)

**Ions Score:** 21 **Expect:** 4.2

**Matches:** 36/161 fragment ions using 54 most intense peaks ([help](#))

| #  | Immon.   | a        | a*       | a <sup>0</sup> | b        | b*       | b <sup>0</sup> | d        | Seq. | v        | w        | y        | y*       | y <sup>0</sup> | #  |
|----|----------|----------|----------|----------------|----------|----------|----------------|----------|------|----------|----------|----------|----------|----------------|----|
| 1  | 101.1073 | 101.1073 | 84.0808  |                | 129.1022 | 112.0757 |                | 44.0495  | K    |          |          |          |          |                | 10 |
| 2  | 129.1135 | 257.2084 | 240.1819 |                | 285.2034 | 268.1768 |                | 172.1444 | R    | 897.5152 | 896.5200 | 998.6105 | 981.5840 | 980.6000       | 9  |
| 3  | 70.0651  | 354.2612 | 337.2346 |                | 382.2561 | 365.2296 |                | 328.2455 | P    | 800.4625 | 799.4672 | 842.5094 | 825.4829 | 824.4989       | 8  |
| 4  | 60.0444  | 441.2932 | 424.2667 | 423.2827       | 469.2881 | 452.2616 | 451.2776       | 425.2983 | S    | 713.4305 | 712.4352 | 745.4567 | 728.4301 | 727.4461       | 7  |
| 5  | 72.0808  | 540.3616 | 523.3351 | 522.3511       | 568.3566 | 551.3300 | 550.3460       | 526.3460 | V    | 614.3620 | 627.3824 | 658.4246 | 641.3981 | 640.4141       | 6  |
| 6  | 86.0964  | 653.4457 | 636.4192 | 635.4351       | 681.4406 | 664.4141 | 663.4301       | 611.3988 | L    | 501.2780 | 500.2827 | 559.3562 | 542.3297 | 541.3457       | 5  |
| 7  | 44.0495  | 724.4828 | 707.4563 | 706.4723       | 752.4777 | 735.4512 | 734.4672       |          | A    | 430.2409 |          | 446.2722 | 429.2456 | 428.2616       | 4  |
| 8  | 86.0964  | 837.5669 | 820.5403 | 819.5563       | 865.5618 | 848.5352 | 847.5512       | 795.5199 | L    | 317.1568 | 316.1615 | 375.2350 | 358.2085 | 357.2245       | 3  |
| 9  | 60.0444  | 924.5989 | 907.5724 | 906.5883       | 952.5938 | 935.5673 | 934.5833       | 908.6040 | S    | 230.1248 | 229.1295 | 262.1510 | 245.1244 | 244.1404       | 2  |
| 10 | 129.1135 |          |          |                |          |          |                |          | R    | 74.0237  | 73.0284  | 175.1190 | 158.0924 |                | 1  |

| Seq   | ya       | yb       | Seq    | ya       | yb       | Seq   | ya       | yb       |
|-------|----------|----------|--------|----------|----------|-------|----------|----------|
| RP    | 226.1662 | 254.1612 | RPS    | 313.1983 | 341.1932 | RPSV  | 412.2667 | 440.2616 |
| RPSVL | 525.3507 | 553.3457 | RPSVLA | 596.3879 | 624.3828 | PS    | 157.0972 | 185.0921 |
| PSV   | 256.1656 | 284.1605 | PSVL   | 369.2496 | 397.2445 | PSVLA | 440.2867 | 468.2817 |

|               |          |                 |                |                 |          |              |          |                 |
|---------------|----------|-----------------|----------------|-----------------|----------|--------------|----------|-----------------|
| <b>PSVLAL</b> | 553.3708 | 581.3657        | <b>PSVLALS</b> | 640.4028        | 668.3978 | <b>SV</b>    | 159.1128 | <b>187.1077</b> |
| <b>SVL</b>    | 272.1969 | 300.1918        | <b>SVLA</b>    | 343.2340        | 371.2289 | <b>SVLAL</b> | 456.3180 | 484.3130        |
| <b>SVLALS</b> | 543.3501 | 571.3450        | <b>VL</b>      | <b>185.1648</b> | 213.1598 | <b>VLA</b>   | 256.2020 | <b>284.1969</b> |
| <b>VLAL</b>   | 369.2860 | <b>397.2809</b> | <b>VLALS</b>   | 456.3180        | 484.3130 | <b>LA</b>    | 157.1335 | <b>185.1285</b> |
| <b>LAL</b>    | 270.2176 | 298.2125        | <b>LALS</b>    | <b>357.2496</b> | 385.2445 | <b>AL</b>    | 157.1335 | <b>185.1285</b> |
| <b>ALS</b>    | 244.1656 | 272.1605        | <b>LS</b>      | 173.1285        | 201.1234 |              |          |                 |

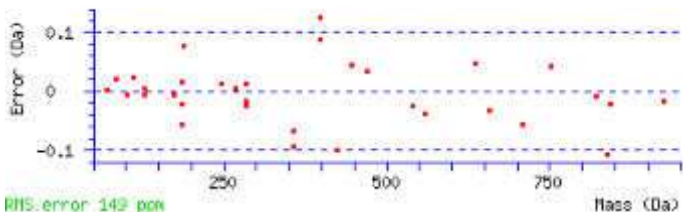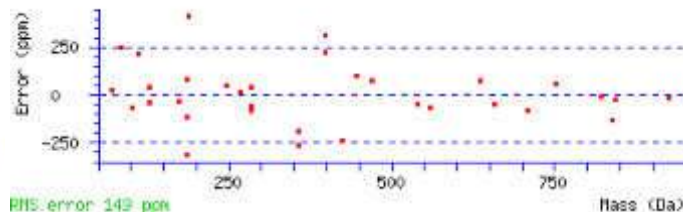

NCBI **BLAST** search of [KRPSVLALSR](#)

(Parameters: blastp, nr protein database, expect=20000, no filter, PAM30)

Other BLAST [web gateways](#)

#### All matches to this query

| Score | Mr(calc)  | Delta  | Sequence                     |
|-------|-----------|--------|------------------------------|
| 21.1  | 1125.6982 | 0.0380 | <a href="#">KRPSVIALSR</a>   |
| 21.1  | 1125.6982 | 0.0380 | <a href="#">KRPSVLALSR</a>   |
| 21.1  | 1125.6618 | 0.0744 | <a href="#">QRPSVLALSR</a>   |
| 13.7  | 1125.6618 | 0.0744 | <a href="#">RQVIASPISR</a>   |
| 11.2  | 1125.6982 | 0.0380 | <a href="#">QRAIVLSALR</a>   |
| 8.6   | 1125.6328 | 0.1034 | <a href="#">VGKAMHGVLAKE</a> |
| 7.8   | 1125.6254 | 0.1108 | <a href="#">ROLPDAALSR</a>   |
| 7.4   | 1125.7121 | 0.0241 | <a href="#">GGGLLAVLVSLK</a> |
| 7.0   | 1125.6506 | 0.0856 | <a href="#">AGRILGPSLDK</a>  |
| 7.0   | 1125.6506 | 0.0856 | <a href="#">AGRLLGPSLDK</a>  |

Mascot: <http://www.matrixscience.com/>



# Mascot Search Results

## Peptide View **Spot no 112**

MS/MS Fragmentation of **YTPESPADATR**

Found in **gi28190676** in **NCBIInr**, putative transketolase [Oryza sativa Japonica Group]

Match to Query 84: 1206.597824 from(1207.605100,1+) intensity(0.0000) index(8)

Title: Label: E1, Spot\_Id: 219678, Peak\_List\_Id: 224904, MSMS Job\_Run\_Id: 21757, Comment:

Data file C:\Documents and Settings\Administrator\Desktop\farah BHU\spot set plate\Farah-Garima 11May 2013\ppw\_E1\_136842029000.txt

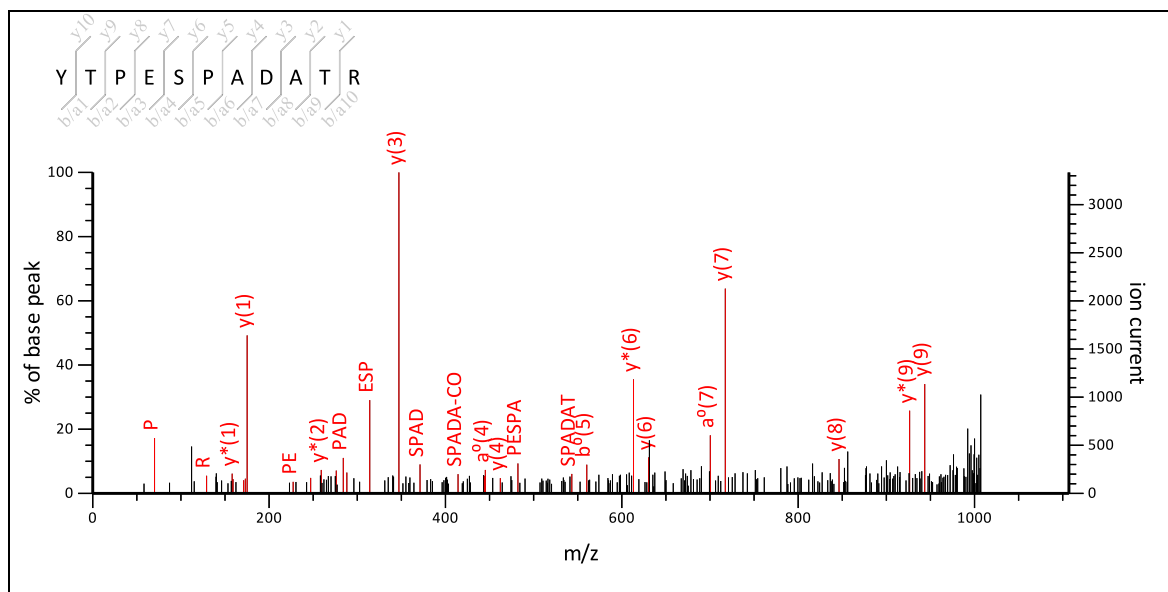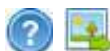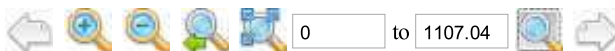

Label all possible matches  Label matches used for scoring

Monoisotopic mass of neutral peptide Mr(calc): 1206.5517

Fixed modifications: Carbamidomethyl (C) (apply to specified residues or termini only)

Ions Score: 41 Expect: 0.16

Matches : 36/174 fragment ions using 60 most intense peaks ([help](#))

| #  | Immon.   | a         | a <sup>0</sup> | b         | b <sup>0</sup> | d        | d'       | Seq. | v        | w         | w'        | y         | y*        | y <sup>0</sup> | #  |
|----|----------|-----------|----------------|-----------|----------------|----------|----------|------|----------|-----------|-----------|-----------|-----------|----------------|----|
| 1  | 136.0757 | 136.0757  |                | 164.0706  |                | 44.0495  |          | Y    |          |           |           |           |           |                | 11 |
| 2  | 74.0600  | 237.1234  | 219.1128       | 265.1183  | 247.1077       | 221.1285 | 223.1077 | T    | 998.4538 | 1011.4742 | 1013.4534 | 1044.4956 | 1027.4691 | 1026.4851      | 10 |
| 3  | 70.0651  | 334.1761  | 316.1656       | 362.1710  | 344.1605       | 308.1605 |          | P    | 901.4010 | 900.4058  |           | 943.4480  | 926.4214  | 925.4374       | 9  |
| 4  | 102.0550 | 463.2187  | 445.2082       | 491.2136  | 473.2031       | 405.2132 |          | E    | 772.3584 | 771.3632  |           | 846.3952  | 829.3686  | 828.3846       | 8  |
| 5  | 60.0444  | 550.2508  | 532.2402       | 578.2457  | 560.2351       | 534.2558 |          | S    | 685.3264 | 684.3311  |           | 717.3526  | 700.3260  | 699.3420       | 7  |
| 6  | 70.0651  | 647.3035  | 629.2930       | 675.2984  | 657.2879       | 621.2879 |          | P    | 588.2736 | 587.2784  |           | 630.3206  | 613.2940  | 612.3100       | 6  |
| 7  | 44.0495  | 718.3406  | 700.3301       | 746.3355  | 728.3250       |          |          | A    | 517.2365 |           |           | 533.2678  | 516.2413  | 515.2572       | 5  |
| 8  | 88.0393  | 833.3676  | 815.3570       | 861.3625  | 843.3519       | 789.3777 |          | D    | 402.2096 | 401.2143  |           | 462.2307  | 445.2041  | 444.2201       | 4  |
| 9  | 44.0495  | 904.4047  | 886.3941       | 932.3996  | 914.3890       |          |          | A    | 331.1724 |           |           | 347.2037  | 330.1772  | 329.1932       | 3  |
| 10 | 74.0600  | 1005.4524 | 987.4418       | 1033.4473 | 1015.4367      | 989.4575 | 991.4367 | T    | 230.1248 | 243.1452  | 245.1244  | 276.1666  | 259.1401  | 258.1561       | 2  |
| 11 | 129.1135 |           |                |           |                |          |          | R    | 74.0237  | 73.0284   |           | 175.1190  | 158.0924  |                | 1  |

| Seq   | ya       | yb       | Seq    | ya       | yb       | Seq     | ya       | yb       |
|-------|----------|----------|--------|----------|----------|---------|----------|----------|
| TP    | 171.1128 | 199.1077 | TPE    | 300.1554 | 328.1503 | TPES    | 387.1874 | 415.1823 |
| TPESP | 484.2402 | 512.2351 | TPESPA | 555.2773 | 583.2722 | TPESPAD | 670.3042 | 698.2992 |
| PE    | 199.1077 | 227.1026 | PES    | 286.1397 | 314.1347 | PESP    | 383.1925 | 411.1874 |
| PESPA | 454.2296 | 482.2245 | PESPAD | 569.2566 | 597.2515 | PESPADA | 640.2937 | 668.2886 |
| ES    | 189.0870 | 217.0819 | ESP    | 286.1397 | 314.1347 | ESPA    | 357.1769 | 385.1718 |

|              |          |          |               |          |          |                |          |          |
|--------------|----------|----------|---------------|----------|----------|----------------|----------|----------|
| <b>ESPAD</b> | 472.2038 | 500.1987 | <b>ESPADA</b> | 543.2409 | 571.2358 | <b>ESPADAT</b> | 644.2886 | 672.2835 |
| <b>SP</b>    | 157.0972 | 185.0921 | <b>SPA</b>    | 228.1343 | 256.1292 | <b>SPAD</b>    | 343.1612 | 371.1561 |
| <b>SPADA</b> | 414.1983 | 442.1932 | <b>SPADAT</b> | 515.2460 | 543.2409 | <b>PA</b>      | 141.1022 | 169.0972 |
| <b>PAD</b>   | 256.1292 | 284.1241 | <b>PADA</b>   | 327.1663 | 355.1612 | <b>PADAT</b>   | 428.2140 | 456.2089 |
| <b>AD</b>    | 159.0764 | 187.0713 | <b>ADA</b>    | 230.1135 | 258.1084 | <b>ADAT</b>    | 331.1612 | 359.1561 |
| <b>DA</b>    | 159.0764 | 187.0713 | <b>DAT</b>    | 260.1241 | 288.1190 | <b>AT</b>      | 145.0972 | 173.0921 |

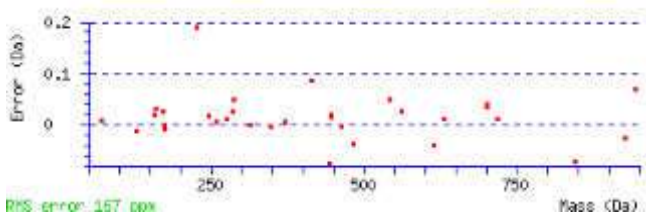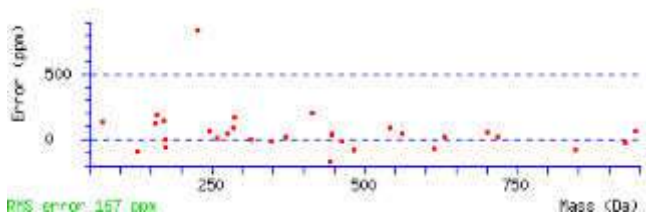

NCBI BLAST search of [YTPESPADATR](#)

(Parameters: blastp, nr protein database, expect=20000, no filter, PAM30)

Other BLAST [web gateways](#)

#### All matches to this query

| Score | Mr(calc)  | Delta   | Sequence                     |
|-------|-----------|---------|------------------------------|
| 41.3  | 1206.5517 | 0.0462  | <a href="#">YTPESPADATR</a>  |
| 16.6  | 1206.6721 | -0.0743 | <a href="#">TTTARGAVFVGK</a> |
| 15.1  | 1206.5373 | 0.0606  | <a href="#">ISPEMQEAMR</a>   |
| 14.1  | 1206.6720 | -0.0742 | <a href="#">YTRSILEGIR</a>   |
| 13.8  | 1206.5373 | 0.0606  | <a href="#">ISPEMQEAMR</a>   |
| 13.6  | 1206.5914 | 0.0064  | <a href="#">SIPEALTSMSR</a>  |
| 13.6  | 1206.6026 | -0.0048 | <a href="#">AESLLSEMRR</a>   |
| 12.2  | 1206.5914 | 0.0064  | <a href="#">IISEGMVDATR</a>  |
| 11.2  | 1206.5881 | 0.0097  | <a href="#">FEDVSTPGVTR</a>  |
| 11.2  | 1206.5411 | 0.0567  | <a href="#">TMEEGQSGGRR</a>  |

Mascot: <http://www.matrixscience.com/>




**Mascot Search Results**
**Peptide View**    **Spot no 112**
**MS/MS Fragmentation of NPYWFNRDR**

 Found in **gi|28190676** in **NCBI**nr, putative transketolase [Oryza sativa Japonica Group]

Match to Query 93: 1266.632824 from(1267.640100,1+) intensity(0.0000) index(10)

Title: Label: E1, Spot\_Id: 219678, Peak\_List\_Id: 224897, MSMS Job\_Run\_Id: 21757, Comment:

Data file C:\Documents and Settings\Administrator\Desktop\farah BHU\spot set plate\Farah-Garima 11May 2013\ppw\_E1\_136842029000.txt

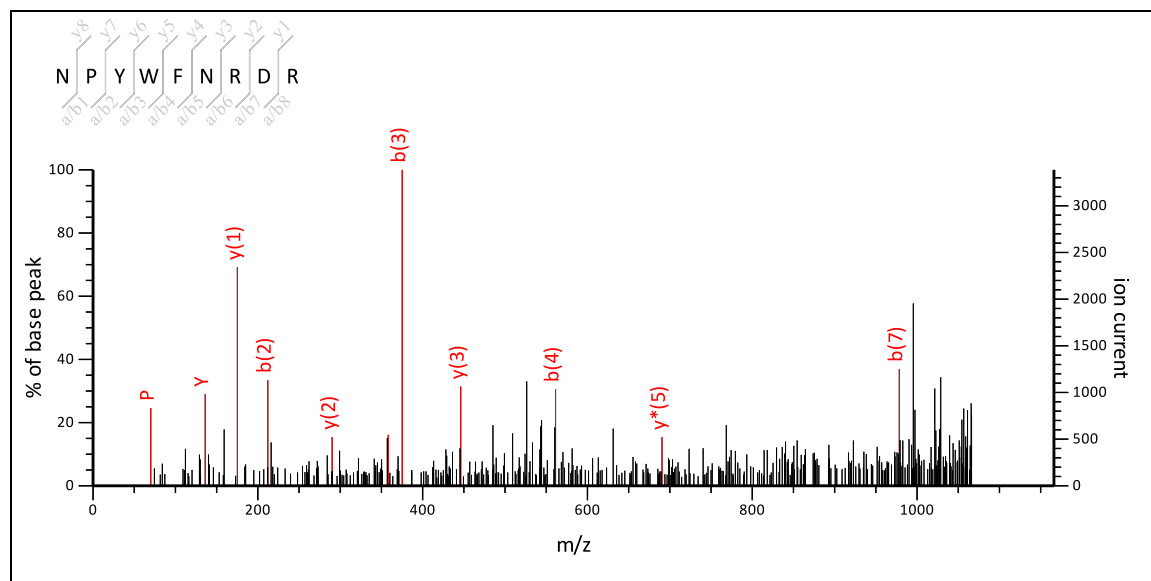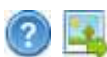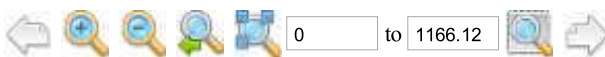
 Label all possible matches     Label matches used for scoring 
**Monoisotopic mass of neutral peptide Mr(calc):** 1266.5894

**Fixed modifications:** Carbamidomethyl (C) (apply to specified residues or termini only)

**Ions Score:** 20    **Expect:** 19

**Matches:** 13/116 fragment ions using 20 most intense peaks ([help](#))

| # | Immon.   | a         | a*        | a <sup>0</sup> | b         | b*        | b <sup>0</sup> | d         | Seq. | v         | w         | y         | y*        | y <sup>0</sup> | # |
|---|----------|-----------|-----------|----------------|-----------|-----------|----------------|-----------|------|-----------|-----------|-----------|-----------|----------------|---|
| 1 | 87.0553  | 87.0553   | 70.0287   |                | 115.0502  | 98.0237   |                | 44.0495   | N    |           |           |           |           |                | 9 |
| 2 | 70.0651  | 184.1081  | 167.0815  |                | 212.1030  | 195.0764  |                | 158.0924  | P    | 1111.5068 | 1110.5116 | 1153.5538 | 1136.5272 | 1135.5432      | 8 |
| 3 | 136.0757 | 347.1714  | 330.1448  |                | 375.1663  | 358.1397  |                |           | Y    | 948.4435  |           | 1056.5010 | 1039.4744 | 1038.4904      | 7 |
| 4 | 159.0917 | 533.2507  | 516.2241  |                | 561.2456  | 544.2191  |                |           | W    | 762.3642  |           | 893.4377  | 876.4111  | 875.4271       | 6 |
| 5 | 120.0808 | 680.3191  | 663.2926  |                | 708.3140  | 691.2875  |                |           | F    | 615.2957  |           | 707.3583  | 690.3318  | 689.3478       | 5 |
| 6 | 87.0553  | 794.3620  | 777.3355  |                | 822.3569  | 805.3304  |                | 751.3562  | N    | 501.2528  | 500.2576  | 560.2899  | 543.2634  | 542.2794       | 4 |
| 7 | 129.1135 | 950.4631  | 933.4366  |                | 978.4581  | 961.4315  |                | 865.3991  | R    | 345.1517  | 344.1565  | 446.2470  | 429.2205  | 428.2364       | 3 |
| 8 | 88.0393  | 1065.4901 | 1048.4635 | 1047.4795      | 1093.4850 | 1076.4585 | 1075.4744      | 1021.5003 | D    | 230.1248  | 229.1295  | 290.1459  | 273.1193  | 272.1353       | 2 |
| 9 | 129.1135 |           |           |                |           |           |                |           | R    | 74.0237   | 73.0284   | 175.1190  | 158.0924  |                | 1 |

| Seq   | ya       | yb       | Seq   | ya       | yb       | Seq  | ya       | yb       |
|-------|----------|----------|-------|----------|----------|------|----------|----------|
| PY    | 233.1285 | 261.1234 | PYW   | 419.2078 | 447.2027 | PYWF | 566.2762 | 594.2711 |
| PYWFN | 680.3191 | 708.3140 | YW    | 322.1550 | 350.1499 | YWF  | 469.2234 | 497.2183 |
| YWFN  | 583.2663 | 611.2613 | WF    | 306.1601 | 334.1550 | WFN  | 420.2030 | 448.1979 |
| WFNR  | 576.3041 | 604.2990 | WFNRD | 691.3311 | 719.3260 | FN   | 234.1237 | 262.1186 |
| FNR   | 390.2248 | 418.2197 | FNRD  | 505.2518 | 533.2467 | NR   | 243.1564 | 271.1513 |
| NRD   | 358.1833 | 386.1783 | RD    | 244.1404 | 272.1353 |      |          |          |

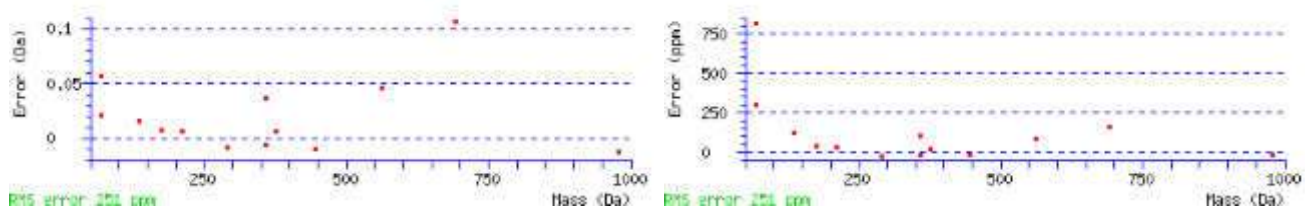

NCBI BLAST search of [NPYWFRDR](#)

(Parameters: blastp, nr protein database, expect=20000, no filter, PAM30)

Other BLAST [web gateways](#)

#### All matches to this query

| Score | Mr(calc)  | Delta   | Sequence                     |
|-------|-----------|---------|------------------------------|
| 20.3  | 1266.5894 | 0.0434  | <a href="#">NPYWFRDR</a>     |
| 16.6  | 1266.6292 | 0.0037  | <a href="#">RLGFPCFNTR</a>   |
| 15.8  | 1266.6932 | -0.0604 | <a href="#">NEALAVGIIPDR</a> |
| 15.4  | 1266.7197 | -0.0869 | <a href="#">VRFAPPLPTNR</a>  |
| 13.8  | 1266.5762 | 0.0567  | <a href="#">TLMESEDASLR</a>  |
| 12.5  | 1266.6391 | -0.0062 | <a href="#">CVGEVPPPGLSR</a> |
| 12.5  | 1266.6568 | -0.0239 | <a href="#">EKVAAPEPAER</a>  |
| 12.0  | 1266.7157 | -0.0828 | <a href="#">TNIVAVGQGRPR</a> |
| 12.0  | 1266.6164 | 0.0164  | <a href="#">ETRSSTSSVASR</a> |
| 11.9  | 1266.6092 | 0.0236  | <a href="#">DSSLPYTELSR</a>  |

Mascot: <http://www.matrixscience.com/>


**Mascot Search Results**
**Peptide View**    **Spot no 112**
MS/MS Fragmentation of **NLSQQCLNALAK**Found in **gi28190676** in **NCBI nr**, putative transketolase [Oryza sativa Japonica Group]

Match to Query 100: 1358.729324 from(1359.736600,1+) intensity(0.0000) index(12)

Title: Label: E1, Spot\_Id: 219678, Peak\_List\_Id: 224912, MSMS Job\_Run\_Id: 21757, Comment:

Data file C:\Documents and Settings\Administrator\Desktop\farah BHU\spot set plate\Farah-Garima 11May 2013\ppw\_E1\_136842029000.txt

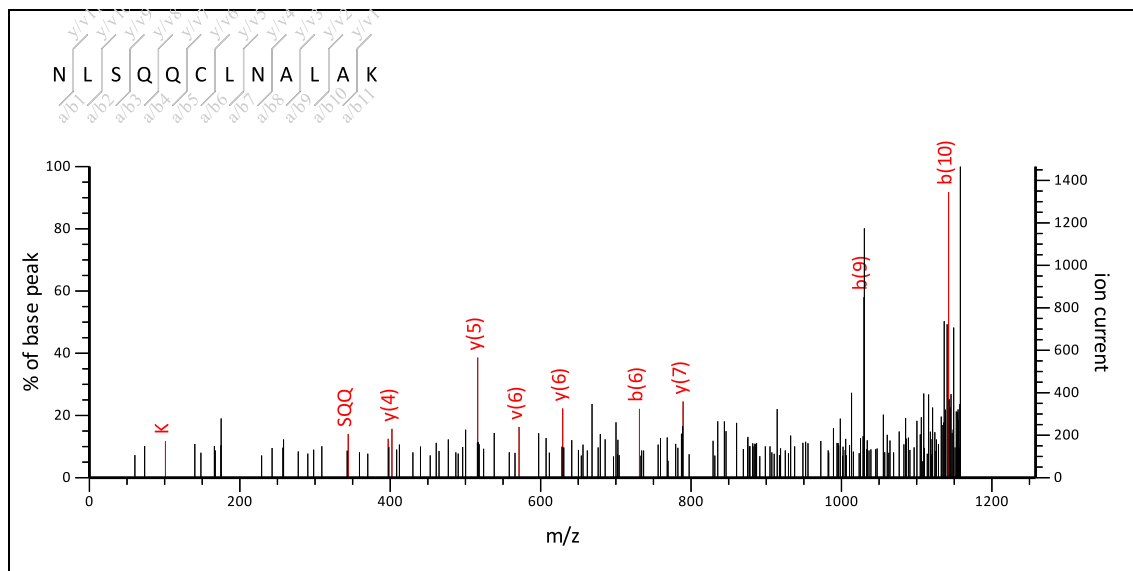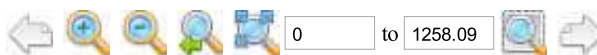Label all possible matches  Label matches used for scoring Monoisotopic mass of neutral peptide **Mr(calc)**: 1358.6976

Fixed modifications: Carbamidomethyl (C) (apply to specified residues or termini only)

Ions Score: 17 Expect: 41

Matches : 16/191 fragment ions using 22 most intense peaks ([help](#))

| #  | Immon.   | a         | a*        | a <sup>0</sup> | b         | b*        | b <sup>0</sup> | d         | Seq. | v         | w         | y         | y*        | y <sup>0</sup> | #  |
|----|----------|-----------|-----------|----------------|-----------|-----------|----------------|-----------|------|-----------|-----------|-----------|-----------|----------------|----|
| 1  | 87.0553  | 87.0553   | 70.0287   |                | 115.0502  | 98.0237   |                | 44.0495   | N    |           |           |           |           |                | 12 |
| 2  | 86.0964  | 200.1394  | 183.1128  |                | 228.1343  | 211.1077  |                | 158.0924  | L    | 1187.5837 | 1186.5885 | 1245.6620 | 1228.6354 | 1227.6514      | 11 |
| 3  | 60.0444  | 287.1714  | 270.1448  | 269.1608       | 315.1663  | 298.1397  | 297.1557       | 271.1765  | S    | 1100.5517 | 1099.5565 | 1132.5779 | 1115.5514 | 1114.5674      | 10 |
| 4  | 101.0709 | 415.2300  | 398.2034  | 397.2194       | 443.2249  | 426.1983  | 425.2143       | 358.2085  | Q    | 972.4931  | 971.4979  | 1045.5459 | 1028.5193 |                | 9  |
| 5  | 101.0709 | 543.2885  | 526.2620  | 525.2780       | 571.2835  | 554.2569  | 553.2729       | 486.2671  | Q    | 844.4346  | 843.4393  | 917.4873  | 900.4608  |                | 8  |
| 6  | 133.0430 | 703.3192  | 686.2926  | 685.3086       | 731.3141  | 714.2876  | 713.3035       | 614.3256  | C    | 684.4039  | 683.4087  | 789.4287  | 772.4022  |                | 7  |
| 7  | 86.0964  | 816.4032  | 799.3767  | 798.3927       | 844.3982  | 827.3716  | 826.3876       | 774.3563  | L    | 571.3198  | 570.3246  | 629.3981  | 612.3715  |                | 6  |
| 8  | 87.0553  | 930.4462  | 913.4196  | 912.4356       | 958.4411  | 941.4145  | 940.4305       | 887.4404  | N    | 457.2769  | 456.2817  | 516.3140  | 499.2875  |                | 5  |
| 9  | 44.0495  | 1001.4833 | 984.4567  | 983.4727       | 1029.4782 | 1012.4517 | 1011.4676      |           | A    | 386.2398  |           | 402.2711  | 385.2445  |                | 4  |
| 10 | 86.0964  | 1114.5674 | 1097.5408 | 1096.5568      | 1142.5623 | 1125.5357 | 1124.5517      | 1072.5204 | L    | 273.1557  | 272.1605  | 331.2340  | 314.2074  |                | 3  |
| 11 | 44.0495  | 1185.6045 | 1168.5779 | 1167.5939      | 1213.5994 | 1196.5728 | 1195.5888      |           | A    | 202.1186  |           | 218.1499  | 201.1234  |                | 2  |
| 12 | 101.1073 |           |           |                |           |           |                |           | K    | 74.0237   | 73.0284   | 147.1128  | 130.0863  |                | 1  |

| Seq    | ya       | yb       | Seq   | ya       | yb       | Seq    | ya       | yb       |
|--------|----------|----------|-------|----------|----------|--------|----------|----------|
| LS     | 173.1285 | 201.1234 | LSQ   | 301.1870 | 329.1819 | LSQQ   | 429.2456 | 457.2405 |
| LSQQC  | 589.2763 | 617.2712 | SQ    | 188.1030 | 216.0979 | SQQ    | 316.1615 | 344.1565 |
| SQQC   | 476.1922 | 504.1871 | SQQCL | 589.2763 | 617.2712 | QQ     | 229.1295 | 257.1244 |
| QQC    | 389.1602 | 417.1551 | QQCL  | 502.2442 | 530.2391 | QQCLN  | 616.2872 | 644.2821 |
| QQCLNA | 687.3243 | 715.3192 | QC    | 261.1016 | 289.0965 | QCL    | 374.1857 | 402.1806 |
| QCLN   | 488.2286 | 516.2235 | QCLNA | 559.2657 | 587.2606 | QCLNAL | 672.3498 | 700.3447 |

|                       |          |          |                        |          |          |                       |          |          |
|-----------------------|----------|----------|------------------------|----------|----------|-----------------------|----------|----------|
| <a href="#">CL</a>    | 246.1271 | 274.1220 | <a href="#">CLN</a>    | 360.1700 | 388.1649 | <a href="#">CLNA</a>  | 431.2071 | 459.2020 |
| <a href="#">CLNAL</a> | 544.2912 | 572.2861 | <a href="#">CLNALA</a> | 615.3283 | 643.3232 | <a href="#">LN</a>    | 200.1394 | 228.1343 |
| <a href="#">LNA</a>   | 271.1765 | 299.1714 | <a href="#">LNAL</a>   | 384.2605 | 412.2554 | <a href="#">LNALA</a> | 455.2976 | 483.2926 |
| <a href="#">NA</a>    | 158.0924 | 186.0873 | <a href="#">NAL</a>    | 271.1765 | 299.1714 | <a href="#">NALA</a>  | 342.2136 | 370.2085 |
| <a href="#">AL</a>    | 157.1335 | 185.1285 | <a href="#">ALA</a>    | 228.1707 | 256.1656 | <a href="#">LA</a>    | 157.1335 | 185.1285 |

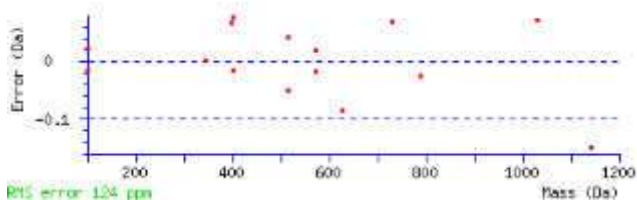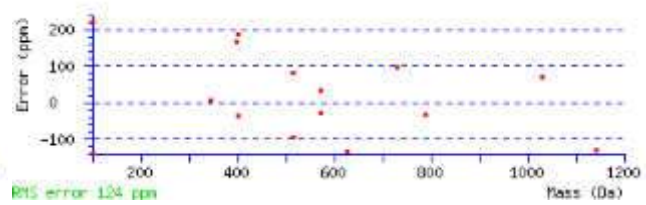

NCBI **BLAST** search of [NLSOQCLNALAK](#)

(Parameters: blastp, nr protein database, expect=20000, no filter, PAM30)

Other BLAST [web gateways](#)

#### All matches to this query

| Score | Mr(calc)  | Delta   | Sequence                       |
|-------|-----------|---------|--------------------------------|
| 19.9  | 1358.6677 | 0.0616  | <a href="#">QELAETQNDLAK</a>   |
| 18.8  | 1358.7405 | -0.0112 | <a href="#">ELSVAESKVLER</a>   |
| 16.9  | 1358.6976 | 0.0317  | <a href="#">NISQOCLNALAK</a>   |
| 16.9  | 1358.6976 | 0.0317  | <a href="#">NLSOQCLNIAK</a>    |
| 16.9  | 1358.6976 | 0.0317  | <a href="#">NLSOQCLNALAK</a>   |
| 15.8  | 1358.7154 | 0.0140  | <a href="#">SGKENLVADALSR</a>  |
| 15.2  | 1358.6691 | 0.0603  | <a href="#">DAAELASHYARR</a>   |
| 14.5  | 1358.6976 | 0.0317  | <a href="#">AGAMNALLESLNR</a>  |
| 13.0  | 1358.7129 | 0.0164  | <a href="#">ERVWCLDIR</a>      |
| 12.0  | 1358.6691 | 0.0602  | <a href="#">KGGVGGGGEVGGWR</a> |

Mascot: <http://www.matrixscience.com/>

**MATRIX SCIENCE Mascot Search Results**

**Peptide View Spot no 112**

**MS/MS Fragmentation of VSLEAGSTLGWQK**

Found in **gi28190676** in **NCBI**nr, putative transketolase [Oryza sativa Japonica Group]

Match to Query 102: 1374.747524 from(1375.754800,1+) intensity(0.0000) index(13)

Title: Label: E1, Spot\_Id: 219678, Peak\_List\_Id: 224914, MSMS Job\_Run\_Id: 21757, Comment:

Data file C:\Documents and Settings\Administrator\Desktop\farah BHU\spot set plate\Farah-Garima 11May 2013\ppw\_E1\_136842029000.txt

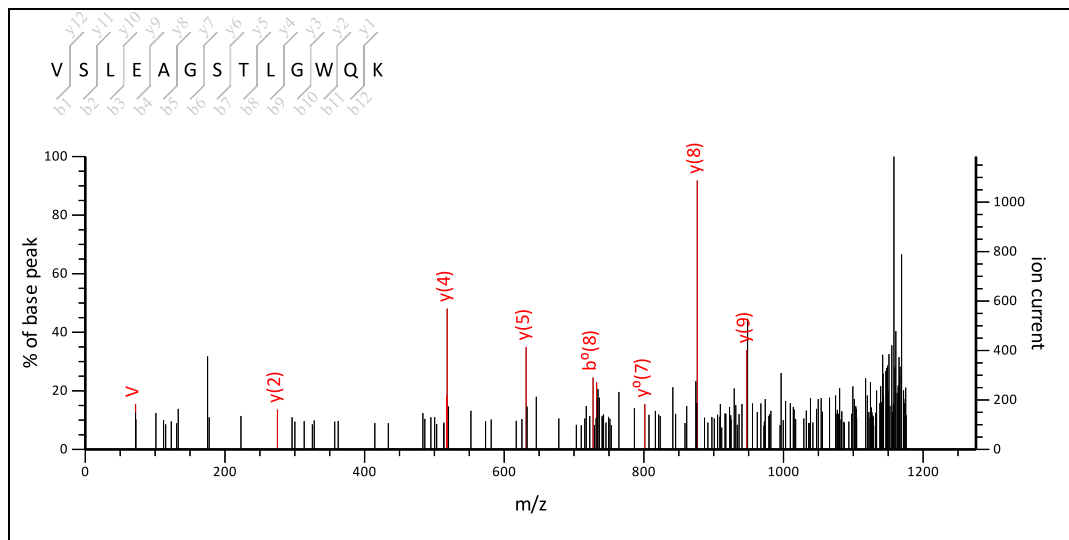

Navigation icons: Home, Back, Forward, Search, Print, Refresh. Range: 0 to 1275.67

Label all possible matches  Label matches used for scoring

Monoisotopic mass of neutral peptide Mr(calc): 1374.7143

Fixed modifications: Carbamidomethyl (C) (apply to specified residues or termini only)

Ions Score: 13 Expect: 98

Matches : 12/208 fragment ions using 35 most intense peaks (help)

| #  | Immon.   | a         | a*        | a <sup>0</sup> | b         | b*        | b <sup>0</sup> | d         | d'       | Seq. | v         | w         | w'       | y         | y*        |
|----|----------|-----------|-----------|----------------|-----------|-----------|----------------|-----------|----------|------|-----------|-----------|----------|-----------|-----------|
| 1  | 72.0808  | 72.0808   |           |                | 100.0757  |           |                | 44.0495   |          | V    |           |           |          |           |           |
| 2  | 60.0444  | 159.1128  |           | 141.1022       | 187.1077  |           | 169.0972       | 143.1179  |          | S    | 1244.6270 | 1243.6317 |          | 1276.6532 | 1259.6266 |
| 3  | 86.0964  | 272.1969  |           | 254.1863       | 300.1918  |           | 282.1812       | 230.1499  |          | L    | 1131.5429 | 1130.5477 |          | 1189.6212 | 1172.5946 |
| 4  | 102.0550 | 401.2395  |           | 383.2289       | 429.2344  |           | 411.2238       | 343.2340  |          | E    | 1002.5003 | 1001.5051 |          | 1076.5371 | 1059.5106 |
| 5  | 44.0495  | 472.2766  |           | 454.2660       | 500.2715  |           | 482.2609       |           |          | A    | 931.4632  |           |          | 947.4945  | 930.4680  |
| 6  | 30.0338  | 529.2980  |           | 511.2875       | 557.2930  |           | 539.2824       |           |          | G    |           |           |          | 876.4574  | 859.4308  |
| 7  | 60.0444  | 616.3301  |           | 598.3195       | 644.3250  |           | 626.3144       | 600.3352  |          | S    | 787.4097  | 786.4145  |          | 819.4359  | 802.4094  |
| 8  | 74.0600  | 717.3777  |           | 699.3672       | 745.3727  |           | 727.3621       | 701.3828  | 703.3621 | T    | 686.3620  | 699.3824  | 701.3617 | 732.4039  | 715.3774  |
| 9  | 86.0964  | 830.4618  |           | 812.4512       | 858.4567  |           | 840.4462       | 788.4149  |          | L    | 573.2780  | 572.2827  |          | 631.3562  | 614.3297  |
| 10 | 30.0338  | 887.4833  |           | 869.4727       | 915.4782  |           | 897.4676       |           |          | G    |           |           |          | 518.2722  | 501.2456  |
| 11 | 159.0917 | 1073.5626 |           | 1055.5520      | 1101.5575 |           | 1083.5469      |           |          | W    | 330.1772  |           |          | 461.2507  | 444.2241  |
| 12 | 101.0709 | 1201.6212 | 1184.5946 | 1183.6106      | 1229.6161 | 1212.5895 | 1211.6055      | 1144.5997 |          | Q    | 202.1186  | 201.1234  |          | 275.1714  | 258.1448  |
| 13 | 101.1073 |           |           |                |           |           |                |           |          | K    | 74.0237   | 73.0284   |          | 147.1128  | 130.0863  |

| Seq   | ya       | yb       | Seq    | ya       | yb       | Seq     | ya       | yb       |
|-------|----------|----------|--------|----------|----------|---------|----------|----------|
| SL    | 173.1285 | 201.1234 | SLE    | 302.1710 | 330.1660 | SLEA    | 373.2082 | 401.2031 |
| SLEAG | 430.2296 | 458.2245 | SLEAGS | 517.2617 | 545.2566 | SLEAGST | 618.3093 | 646.3042 |
| LE    | 215.1390 | 243.1339 | LEA    | 286.1761 | 314.1710 | LEAG    | 343.1976 | 371.1925 |
| LEAGS | 430.2296 | 458.2245 | LEAGST | 531.2773 | 559.2722 | LEAGSTL | 644.3614 | 672.3563 |
| EA    | 173.0921 | 201.0870 | EAG    | 230.1135 | 258.1084 | EAGS    | 317.1456 | 345.1405 |
| EAGST | 418.1932 | 446.1882 | EAGSTL | 531.2773 | 559.2722 | EAGSTLG | 588.2988 | 616.2937 |
| AG    | 101.0709 | 129.0659 | AGS    | 188.1030 | 216.0979 | AGST    | 289.1506 | 317.1456 |
| AGSTL | 402.2347 | 430.2296 | AGSTLG | 459.2562 | 487.2511 | AGSTLGW | 645.3355 | 673.3304 |

|               |          |          |               |          |          |              |          |          |
|---------------|----------|----------|---------------|----------|----------|--------------|----------|----------|
| <b>GS</b>     | 117.0659 | 145.0608 | <b>GST</b>    | 218.1135 | 246.1084 | <b>GSTL</b>  | 331.1976 | 359.1925 |
| <b>GSTLG</b>  | 388.2191 | 416.2140 | <b>GSTLGW</b> | 574.2984 | 602.2933 | <b>ST</b>    | 161.0921 | 189.0870 |
| <b>STL</b>    | 274.1761 | 302.1710 | <b>STLG</b>   | 331.1976 | 359.1925 | <b>STLGW</b> | 517.2769 | 545.2718 |
| <b>STLGWQ</b> | 645.3355 | 673.3304 | <b>TL</b>     | 187.1441 | 215.1390 | <b>TLG</b>   | 244.1656 | 272.1605 |
| <b>TLGW</b>   | 430.2449 | 458.2398 | <b>TLGWQ</b>  | 558.3035 | 586.2984 | <b>LG</b>    | 143.1179 | 171.1128 |
| <b>LGW</b>    | 329.1972 | 357.1921 | <b>LGWQ</b>   | 457.2558 | 485.2507 | <b>GW</b>    | 216.1131 | 244.1081 |
| <b>GWQ</b>    | 344.1717 | 372.1666 | <b>WQ</b>     | 287.1503 | 315.1452 |              |          |          |

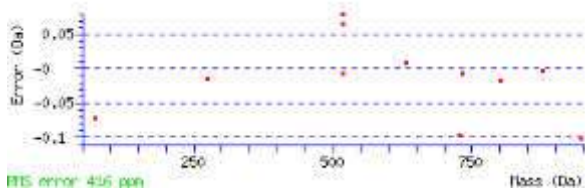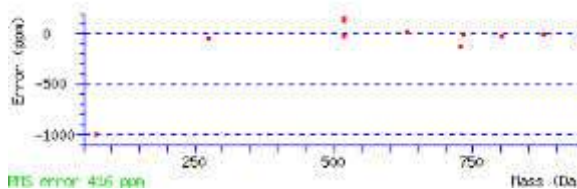

NCBI **BLAST** search of [VSLEAGSTLGWQK](#)

(Parameters: blastp, nr protein database, expect=20000, no filter, PAM30)

Other BLAST [web gateways](#)

#### All matches to this query

| Score | Mr(calc)  | Delta  | Sequence                       |
|-------|-----------|--------|--------------------------------|
| 13.0  | 1374.7143 | 0.0332 | <a href="#">VSLEAGSTLGWQK</a>  |
| 11.3  | 1374.6991 | 0.0485 | <a href="#">VALSESTGLDOKQ</a>  |
| 8.7   | 1374.6925 | 0.0550 | <a href="#">GEELARAMETLR</a>   |
| 8.7   | 1374.7177 | 0.0298 | <a href="#">VAITDMKVDVER</a>   |
| 6.8   | 1374.7363 | 0.0112 | <a href="#">AKALVPMMETIR</a>   |
| 6.4   | 1374.6813 | 0.0662 | <a href="#">VOIMOELDDIR</a>    |
| 6.1   | 1374.7004 | 0.0471 | <a href="#">GAKAATGSQSVWGR</a> |
| 5.4   | 1374.7103 | 0.0373 | <a href="#">ASNASSLEQLSLR</a>  |
| 5.1   | 1374.6561 | 0.0914 | <a href="#">AVEEAMDELGRR</a>   |
| 5.1   | 1374.6991 | 0.0485 | <a href="#">LSDTELASSPLR</a>   |

Mascot: <http://www.matrixscience.com/>

**MATRIX SCIENCE Mascot Search Results**

**Peptide View Spot no 112**

MS/MS Fragmentation of **ANSYSVHGSALGTK**

Found in **gi28190676** in **NCBIInr**, putative transketolase [Oryza sativa Japonica Group]

Match to Query 105: 1390.736224 from(1391.743500,1+) intensity(0.0000) index(14)

Title: Label: E1, Spot\_Id: 219678, Peak\_List\_Id: 224906, MSMS Job\_Run\_Id: 21757, Comment:

Data file C:\Documents and Settings\Administrator\Desktop\farah BHU\spot set plate\Farah-Garima 11May 2013\ppw\_E1\_136842029000.txt

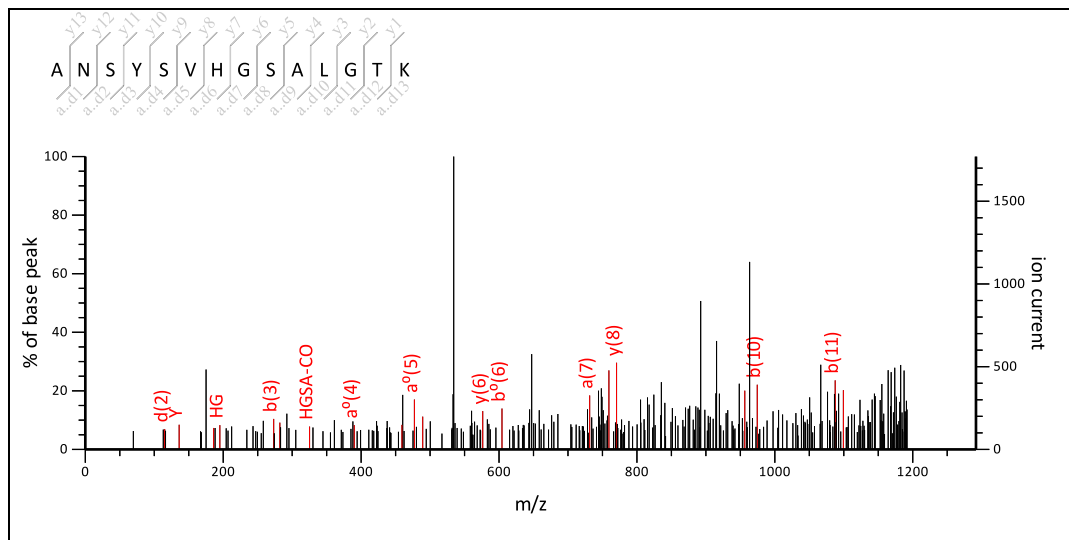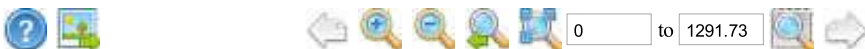

Label all possible matches  Label matches used for scoring

Monoisotopic mass of neutral peptide Mr(calc): 1390.6841

Fixed modifications: Carbamidomethyl (C) (apply to specified residues or termini only)

Ions Score: 8 Expect: 3.2e+02

Matches : 25/253 fragment ions using 72 most intense peaks (help)

| #  | Immon.   | a         | a*        | a <sup>0</sup> | b         | b*        | b <sup>0</sup> | d         | d'        | Seq. | v         | w         | w'       | y         | y*        |
|----|----------|-----------|-----------|----------------|-----------|-----------|----------------|-----------|-----------|------|-----------|-----------|----------|-----------|-----------|
| 1  | 44.0495  | 44.0495   |           |                | 72.0444   |           |                | 44.0495   |           | A    |           |           |          |           |           |
| 2  | 87.0553  | 158.0924  | 141.0659  |                | 186.0873  | 169.0608  |                | 115.0866  |           | N    | 1261.6171 | 1260.6219 |          | 1320.6543 | 1303.6277 |
| 3  | 60.0444  | 245.1244  | 228.0979  | 227.1139       | 273.1193  | 256.0928  | 255.1088       | 229.1295  |           | S    | 1174.5851 | 1173.5899 |          | 1206.6113 | 1189.5848 |
| 4  | 136.0757 | 408.1878  | 391.1612  | 390.1772       | 436.1827  | 419.1561  | 418.1721       |           |           | Y    | 1011.5218 |           |          | 1119.5793 | 1102.5528 |
| 5  | 60.0444  | 495.2198  | 478.1932  | 477.2092       | 523.2147  | 506.1882  | 505.2041       | 479.2249  |           | S    | 924.4898  | 923.4945  |          | 956.5160  | 939.4894  |
| 6  | 72.0808  | 594.2882  | 577.2617  | 576.2776       | 622.2831  | 605.2566  | 604.2726       | 580.2726  |           | V    | 825.4213  | 838.4417  |          | 869.4839  | 852.4574  |
| 7  | 110.0713 | 731.3471  | 714.3206  | 713.3365       | 759.3420  | 742.3155  | 741.3315       |           |           | H    | 688.3624  |           |          | 770.4155  | 753.3890  |
| 8  | 30.0338  | 788.3686  | 771.3420  | 770.3580       | 816.3635  | 799.3369  | 798.3529       |           |           | G    |           |           |          | 633.3566  | 616.3301  |
| 9  | 60.0444  | 875.4006  | 858.3741  | 857.3900       | 903.3955  | 886.3690  | 885.3850       | 859.4057  |           | S    | 544.3089  | 543.3137  |          | 576.3352  | 559.3086  |
| 10 | 44.0495  | 946.4377  | 929.4112  | 928.4272       | 974.4326  | 957.4061  | 956.4221       |           |           | A    | 473.2718  |           |          | 489.3031  | 472.2766  |
| 11 | 86.0964  | 1059.5218 | 1042.4952 | 1041.5112      | 1087.5167 | 1070.4901 | 1069.5061      | 1017.4748 |           | L    | 360.1878  | 359.1925  |          | 418.2660  | 401.2395  |
| 12 | 30.0338  | 1116.5432 | 1099.5167 | 1098.5327      | 1144.5382 | 1127.5116 | 1126.5276      |           |           | G    |           |           |          | 305.1819  | 288.1554  |
| 13 | 74.0600  | 1217.5909 | 1200.5644 | 1199.5804      | 1245.5858 | 1228.5593 | 1227.5753      | 1201.5960 | 1203.5753 | T    | 202.1186  | 215.1390  | 217.1183 | 248.1605  | 231.1339  |
| 14 | 101.1073 |           |           |                |           |           |                |           |           | K    | 74.0237   | 73.0284   |          | 147.1128  | 130.0863  |

| Seq    | ya       | yb       | Seq     | ya       | yb       | Seq   | ya       | yb       |
|--------|----------|----------|---------|----------|----------|-------|----------|----------|
| NS     | 174.0873 | 202.0822 | NSY     | 337.1506 | 365.1456 | NSYS  | 424.1827 | 452.1776 |
| NSYSV  | 523.2511 | 551.2460 | NSYSVH  | 660.3100 | 688.3049 | SY    | 223.1077 | 251.1026 |
| SYS    | 310.1397 | 338.1347 | SYSV    | 409.2082 | 437.2031 | SYSVH | 546.2671 | 574.2620 |
| SYSVHG | 603.2885 | 631.2835 | SYSVHGS | 690.3206 | 718.3155 | YS    | 223.1077 | 251.1026 |
| YSV    | 322.1761 | 350.1710 | YSVH    | 459.2350 | 487.2300 | YSVHG | 516.2565 | 544.2514 |
| YSVHGS | 603.2885 | 631.2835 | YSVHGS  | 674.3256 | 702.3206 | SV    | 159.1128 | 187.1077 |
| SVH    | 296.1717 | 324.1666 | SVHG    | 353.1932 | 381.1881 | SVHGS | 440.2252 | 468.2201 |



|                        |          |          |                        |          |          |                        |          |          |
|------------------------|----------|----------|------------------------|----------|----------|------------------------|----------|----------|
| <a href="#">SVHGSA</a> | 511.2623 | 539.2572 | <a href="#">SVHGSA</a> | 624.3464 | 652.3413 | <a href="#">SVHGSA</a> | 681.3678 | 709.3628 |
| <a href="#">VH</a>     | 209.1397 | 237.1346 | <a href="#">VHG</a>    | 266.1612 | 294.1561 | <a href="#">VHGS</a>   | 353.1932 | 381.1881 |
| <a href="#">VHGSA</a>  | 424.2303 | 452.2252 | <a href="#">VHGSA</a>  | 537.3144 | 565.3093 | <a href="#">VHGSA</a>  | 594.3358 | 622.3307 |
| <a href="#">VHGSA</a>  | 695.3835 | 723.3784 | <a href="#">HG</a>     | 167.0927 | 195.0877 | <a href="#">HGS</a>    | 254.1248 | 282.1197 |
| <a href="#">HGS</a>    | 325.1619 | 353.1568 | <a href="#">HGS</a>    | 438.2459 | 466.2409 | <a href="#">HGS</a>    | 495.2674 | 523.2623 |
| <a href="#">HGS</a>    | 596.3151 | 624.3100 | <a href="#">GS</a>     | 117.0659 | 145.0608 | <a href="#">GSA</a>    | 188.1030 | 216.0979 |
| <a href="#">GS</a>     | 301.1870 | 329.1819 | <a href="#">GS</a>     | 358.2085 | 386.2034 | <a href="#">GS</a>     | 459.2562 | 487.2511 |
| <a href="#">SA</a>     | 131.0815 | 159.0764 | <a href="#">SAL</a>    | 244.1656 | 272.1605 | <a href="#">SAL</a>    | 301.1870 | 329.1819 |
| <a href="#">SAL</a>    | 402.2347 | 430.2296 | <a href="#">AL</a>     | 157.1335 | 185.1285 | <a href="#">AL</a>     | 214.1550 | 242.1499 |
| <a href="#">AL</a>     | 315.2027 | 343.1976 | <a href="#">LG</a>     | 143.1179 | 171.1128 | <a href="#">LGT</a>    | 244.1656 | 272.1605 |
| <a href="#">GT</a>     | 131.0815 | 159.0764 |                        |          |          |                        |          |          |

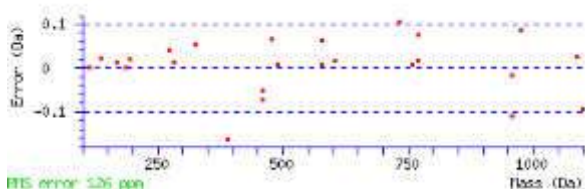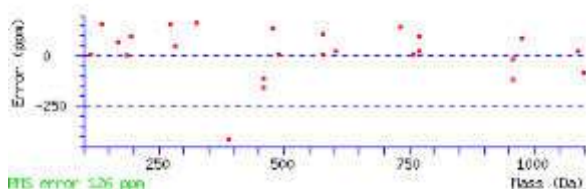

NCBI BLAST search of [ANSYSVHGSA](#)

(Parameters: blastp, nr protein database, expect=20000, no filter, PAM30)

Other BLAST [web gateways](#)

#### All matches to this query

| Score | Mr(calc)  | Delta   | Sequence                          |
|-------|-----------|---------|-----------------------------------|
| 11.5  | 1390.7126 | 0.0236  | <a href="#">VKATESELMDLR</a>      |
| 11.3  | 1390.6298 | 0.1064  | <a href="#">GRGGTQSSGGGSGGGGR</a> |
| 10.6  | 1390.6407 | 0.0955  | <a href="#">RYMIMTTNMSK</a>       |
| 8.8   | 1390.6407 | 0.0955  | <a href="#">RYMIMTTNMSK</a>       |
| 8.6   | 1390.6510 | 0.0852  | <a href="#">NEGOAEMGSAILR</a>     |
| 8.2   | 1390.6841 | 0.0521  | <a href="#">ANSYSVHGSA</a>        |
| 7.6   | 1390.6623 | 0.0739  | <a href="#">RASASSTSPSGMPR</a>    |
| 7.3   | 1390.6576 | 0.0786  | <a href="#">IAKEDSTDDIER</a>      |
| 7.2   | 1390.6623 | 0.0739  | <a href="#">GTLLDGSDMNGRR</a>     |
| 6.8   | 1390.7431 | -0.0069 | <a href="#">HPISVFLYMLR</a>       |

Mascot: <http://www.matrixscience.com/>



# Mascot Search Results

## Peptide View Spot no 112

MS/MS Fragmentation of **YNPKNPYWFR**

Found in **gi|28190676** in **NCBI**nr, putative transketolase [Oryza sativa Japonica Group]

Match to Query 115: 1497.774024 from(1498.781300,1+) intensity(0.0000) index(17)

Title: Label: E1, Spot\_Id: 219678, Peak\_List\_Id: 224902, MSMS Job\_Run\_Id: 21757, Comment:

Data file C:\Documents and Settings\Administrator\Desktop\farah BHU\spot set plate\Farah-Garima 11May 2013\ppw\_E1\_136842029000.txt

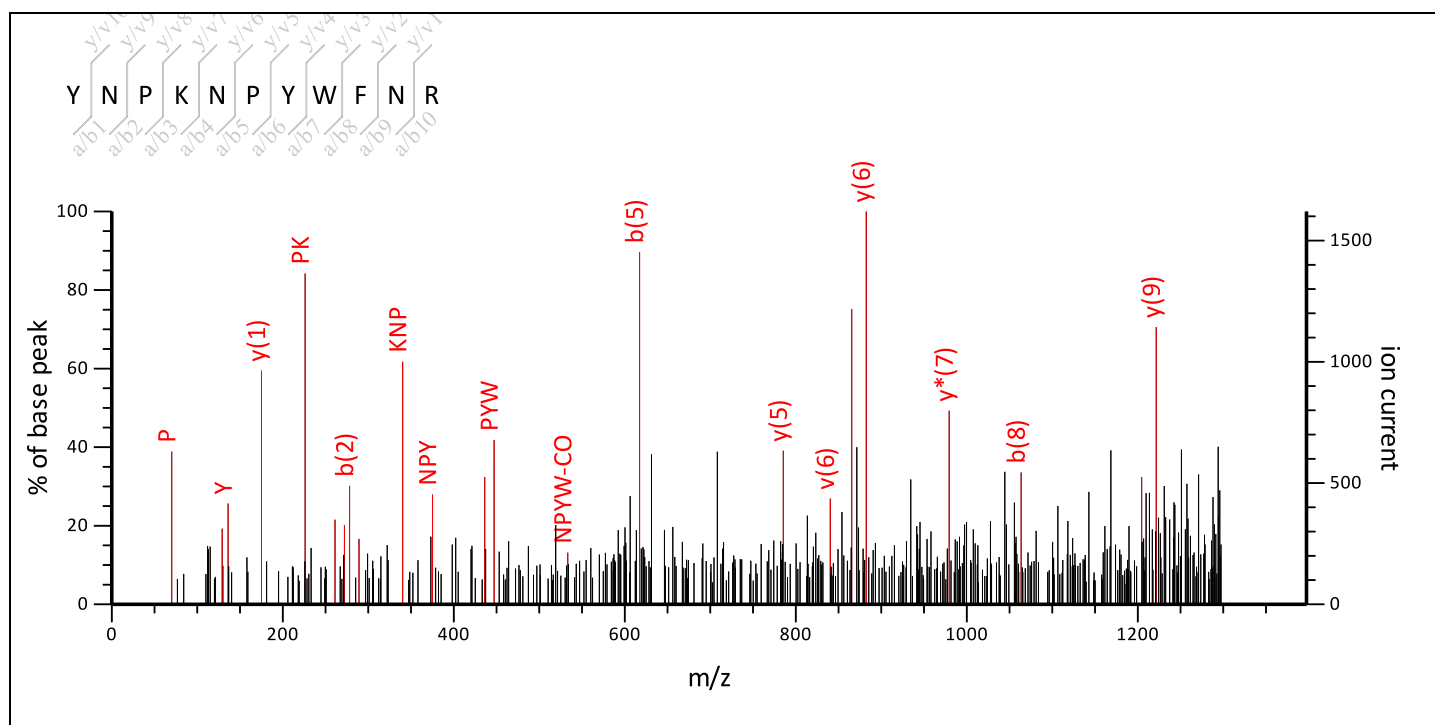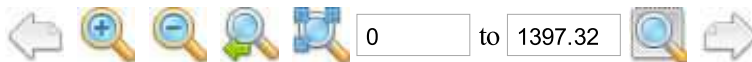

Label all possible matches  Label matches used for scoring

**Monoisotopic mass of neutral peptide Mr(calc):** 1497.7153

**Fixed modifications:** Carbamidomethyl (C) (apply to specified residues or termini only)

**Ions Score:** 20 **Expect:** 18

**Matches:** 32/144 fragment ions using 52 most intense peaks ([help](#))

| # | Immon.   | a         | a*        | b         | b*        | d        | Seq. | v         | w         | y         | y*        | #  |
|---|----------|-----------|-----------|-----------|-----------|----------|------|-----------|-----------|-----------|-----------|----|
| 1 | 136.0757 | 136.0757  |           | 164.0706  |           | 44.0495  | Y    |           |           |           |           | 11 |
| 2 | 87.0553  | 250.1186  | 233.0921  | 278.1135  | 261.0870  | 207.1128 | N    | 1276.6222 | 1275.6269 | 1335.6593 | 1318.6327 | 10 |
| 3 | 70.0651  | 347.1714  | 330.1448  | 375.1663  | 358.1397  | 321.1557 | P    | 1179.5694 | 1178.5742 | 1221.6164 | 1204.5898 | 9  |
| 4 | 101.1073 | 475.2663  | 458.2398  | 503.2613  | 486.2347  | 418.2085 | K    | 1051.4744 | 1050.4792 | 1124.5636 | 1107.5370 | 8  |
| 5 | 87.0553  | 589.3093  | 572.2827  | 617.3042  | 600.2776  | 546.3035 | N    | 937.4315  | 936.4363  | 996.4686  | 979.4421  | 7  |
| 6 | 70.0651  | 686.3620  | 669.3355  | 714.3570  | 697.3304  | 660.3464 | P    | 840.3787  | 839.3835  | 882.4257  | 865.3992  | 6  |
| 7 | 136.0757 | 849.4254  | 832.3988  | 877.4203  | 860.3937  |          | Y    | 677.3154  |           | 785.3729  | 768.3464  | 5  |
| 8 | 159.0917 | 1035.5047 | 1018.4781 | 1063.4996 | 1046.4730 |          | W    | 491.2361  |           | 622.3096  | 605.2831  | 4  |

|    |                 |           |           |           |           |           |   |          |          |                 |                 |   |
|----|-----------------|-----------|-----------|-----------|-----------|-----------|---|----------|----------|-----------------|-----------------|---|
| 9  | 120.0808        | 1182.5731 | 1165.5465 | 1210.5680 | 1193.5415 |           | F | 344.1677 |          | <b>436.2303</b> | 419.2037        | 3 |
| 10 | 87.0553         | 1296.6160 | 1279.5895 | 1324.6109 | 1307.5844 | 1253.6102 | N | 230.1248 | 229.1295 | <b>289.1619</b> | <b>272.1353</b> | 2 |
| 11 | <b>129.1135</b> |           |           |           |           |           | R | 74.0237  | 73.0284  | <b>175.1190</b> | 158.0924        | 1 |

| Seq   | ya              | yb              | Seq    | ya       | yb              | Seq   | ya              | yb              |
|-------|-----------------|-----------------|--------|----------|-----------------|-------|-----------------|-----------------|
| NP    | 184.1081        | 212.1030        | NPK    | 312.2030 | <b>340.1979</b> | NPKN  | 426.2459        | 454.2409        |
| NPKNP | 523.2987        | 551.2936        | NPKNPY | 686.3620 | 714.3570        | PK    | 198.1601        | <b>226.1550</b> |
| PKN   | 312.2030        | <b>340.1979</b> | PKNP   | 409.2558 | 437.2507        | PKNPY | 572.3191        | 600.3140        |
| KN    | 215.1503        | 243.1452        | KNP    | 312.2030 | <b>340.1979</b> | KNPY  | 475.2663        | 503.2613        |
| KNPYW | 661.3457        | 689.3406        | NP     | 184.1081 | 212.1030        | NPY   | 347.1714        | <b>375.1663</b> |
| NPYW  | <b>533.2507</b> | 561.2456        | NPYWF  | 680.3191 | 708.3140        | PY    | <b>233.1285</b> | <b>261.1234</b> |
| PYW   | 419.2078        | <b>447.2027</b> | PYWF   | 566.2762 | 594.2711        | PYWFN | 680.3191        | 708.3140        |
| YW    | 322.1550        | 350.1499        | YWF    | 469.2234 | 497.2183        | YWFN  | 583.2663        | 611.2613        |
| WF    | 306.1601        | 334.1550        | WFN    | 420.2030 | 448.1979        | FN    | 234.1237        | 262.1186        |

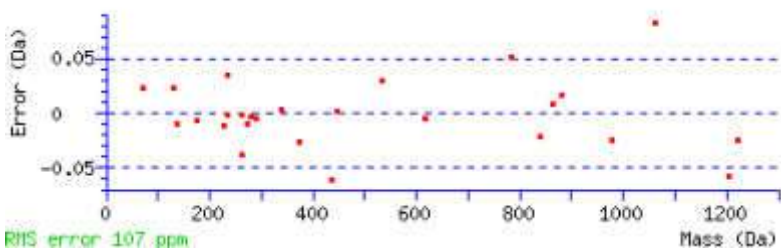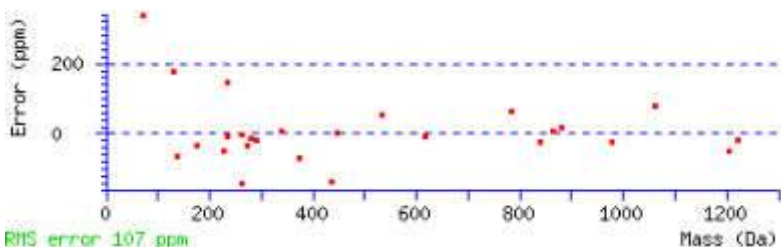

NCBI BLAST search of [YNPKNPYWFN](#)

(Parameters: blastp, nr protein database, expect=20000, no filter, PAM30)

Other BLAST [web gateways](#)

**All matches to this query**

| Score | Mr(calc)  | Delta   | Sequence                         |
|-------|-----------|---------|----------------------------------|
| 20.3  | 1497.7153 | 0.0587  | <a href="#">YNPKNPYWFN</a>       |
| 13.2  | 1497.8416 | -0.0676 | <a href="#">RPLPDYVQKVQR</a>     |
| 10.7  | 1497.7834 | -0.0094 | <a href="#">MAVGGRGPAVGGGLQR</a> |
| 9.0   | 1497.7762 | -0.0022 | <a href="#">KLIAQCWEPTPR</a>     |
| 9.0   | 1497.6751 | 0.0989  | <a href="#">MLRCHAPPQCGR</a>     |
| 8.2   | 1497.6332 | 0.1409  | <a href="#">NYEDAVGSGSGSAER</a>  |
| 7.9   | 1497.7333 | 0.0407  | <a href="#">MGGLPPVHGHMPR</a>    |
| 7.5   | 1497.7113 | 0.0627  | <a href="#">NTWQVYDFNR</a>       |
| 7.5   | 1497.8629 | -0.0889 | <a href="#">QPVILFSPMIPLK</a>    |

|     |           |        |                              |
|-----|-----------|--------|------------------------------|
| 7.4 | 1497.7609 | 0.0131 | <a href="#">MEEGLGPLQQIR</a> |
|-----|-----------|--------|------------------------------|

|                                                                                          |
|------------------------------------------------------------------------------------------|
| <b>Mascot:</b> <a href="http://www.matrixscience.com/">http://www.matrixscience.com/</a> |
|------------------------------------------------------------------------------------------|

**MATRIX SCIENCE Mascot Search Results**

**Peptide View Spot no 112**

MS/MS Fragmentation of **AIGIDKFGASAPAGK**

Found in **gi28190676** in **NCBI**nr, putative transketolase [Oryza sativa Japonica Group]

Match to Query 108: 1401.796924 from(1402.804200,1+) intensity(0.0000) index(15)

Title: Label: E1, Spot\_Id: 219678, Peak\_List\_Id: 224911, MSMS Job\_Run\_Id: 21757, Comment:

Data file C:\Documents and Settings\Administrator\Desktop\farah BHU\spot set plate\Farah-Garima 11May 2013\ppw\_E1\_136842029000.txt

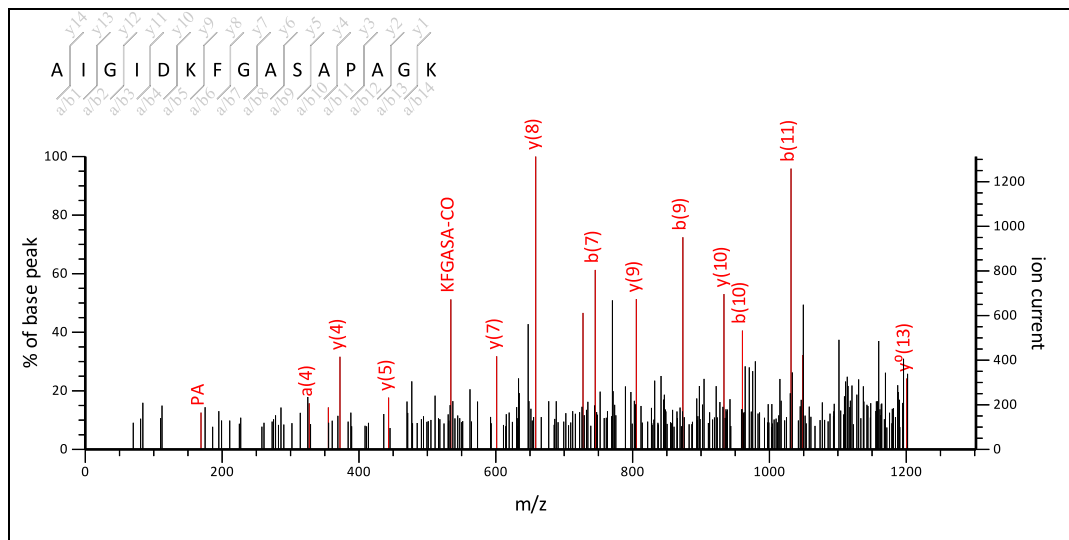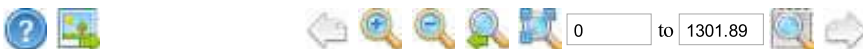

Label all possible matches  Label matches used for scoring

Monoisotopic mass of neutral peptide Mr(calc): 1401.7616

Fixed modifications: Carbamidomethyl (C) (apply to specified residues or termini only)

Ions Score: 32 Expect: 1.2

Matches : 23/260 fragment ions using 36 most intense peaks ([help](#))

| #  | Immon.   | a         | a*        | a <sup>0</sup> | b         | b*        | b <sup>0</sup> | d         | d'       | Seq. | v         | w         | w'        | y         | y*        |
|----|----------|-----------|-----------|----------------|-----------|-----------|----------------|-----------|----------|------|-----------|-----------|-----------|-----------|-----------|
| 1  | 44.0495  | 44.0495   |           |                | 72.0444   |           |                | 44.0495   |          | A    |           |           |           |           |           |
| 2  | 86.0964  | 157.1335  |           |                | 185.1285  |           |                | 129.1022  | 143.1179 | I    | 1273.6535 | 1286.6739 | 1300.6896 | 1331.7318 | 1314.7052 |
| 3  | 30.0338  | 214.1550  |           |                | 242.1499  |           |                |           |          | G    |           |           |           | 1218.6477 | 1201.6212 |
| 4  | 86.0964  | 327.2391  |           |                | 355.2340  |           |                | 299.2078  | 313.2234 | I    | 1103.5480 | 1116.5684 | 1130.5841 | 1161.6263 | 1144.5997 |
| 5  | 88.0393  | 442.2660  |           | 424.2554       | 470.2609  |           | 452.2504       | 398.2762  |          | D    | 988.5211  | 987.5258  |           | 1048.5422 | 1031.5156 |
| 6  | 101.1073 | 570.3610  | 553.3344  | 552.3504       | 598.3559  | 581.3293  | 580.3453       | 513.3031  |          | K    | 860.4261  | 859.4308  |           | 933.5152  | 916.4887  |
| 7  | 120.0808 | 717.4294  | 700.4028  | 699.4188       | 745.4243  | 728.3978  | 727.4137       |           |          | F    | 713.3577  |           |           | 805.4203  | 788.3937  |
| 8  | 30.0338  | 774.4509  | 757.4243  | 756.4403       | 802.4458  | 785.4192  | 784.4352       |           |          | G    |           |           |           | 658.3519  | 641.3253  |
| 9  | 44.0495  | 845.4880  | 828.4614  | 827.4774       | 873.4829  | 856.4563  | 855.4723       |           |          | A    | 585.2991  |           |           | 601.3304  | 584.3039  |
| 10 | 60.0444  | 932.5200  | 915.4934  | 914.5094       | 960.5149  | 943.4884  | 942.5043       | 916.5251  |          | S    | 498.2671  | 497.2718  |           | 530.2933  | 513.2667  |
| 11 | 44.0495  | 1003.5571 | 986.5306  | 985.5465       | 1031.5520 | 1014.5255 | 1013.5415      |           |          | A    | 427.2300  |           |           | 443.2613  | 426.2347  |
| 12 | 70.0651  | 1100.6099 | 1083.5833 | 1082.5993      | 1128.6048 | 1111.5782 | 1110.5942      | 1074.5942 |          | P    | 330.1772  | 329.1819  |           | 372.2241  | 355.1976  |
| 13 | 44.0495  | 1171.6470 | 1154.6204 | 1153.6364      | 1199.6419 | 1182.6154 | 1181.6313      |           |          | A    | 259.1401  |           |           | 275.1714  | 258.1448  |
| 14 | 30.0338  | 1228.6684 | 1211.6419 | 1210.6579      | 1256.6634 | 1239.6368 | 1238.6528      |           |          | G    |           |           |           | 204.1343  | 187.1077  |
| 15 | 101.1073 |           |           |                |           |           |                |           |          | K    | 74.0237   | 73.0284   |           | 147.1128  | 130.0863  |

| Seq    | ya       | yb       | Seq     | ya       | yb       | Seq   | ya       | yb       |
|--------|----------|----------|---------|----------|----------|-------|----------|----------|
| IG     | 143.1179 | 171.1128 | IGI     | 256.2020 | 284.1969 | IGID  | 371.2289 | 399.2238 |
| IGIDK  | 499.3239 | 527.3188 | IGIDKF  | 646.3923 | 674.3872 | GI    | 143.1179 | 171.1128 |
| GID    | 258.1448 | 286.1397 | GIDK    | 386.2398 | 414.2347 | GIDKF | 533.3082 | 561.3031 |
| GIDKFG | 590.3297 | 618.3246 | GIDKFGA | 661.3668 | 689.3617 | ID    | 201.1234 | 229.1183 |
| IDK    | 329.2183 | 357.2132 | IDKF    | 476.2867 | 504.2817 | IDKFG | 533.3082 | 561.3031 |
| IDKFGA | 604.3453 | 632.3402 | IDKFGAS | 691.3774 | 719.3723 | DK    | 216.1343 | 244.1292 |

|               |          |          |                |          |          |                 |          |          |
|---------------|----------|----------|----------------|----------|----------|-----------------|----------|----------|
| <b>DKF</b>    | 363.2027 | 391.1976 | <b>DKFG</b>    | 420.2241 | 448.2191 | <b>DKFGA</b>    | 491.2613 | 519.2562 |
| <b>DKFGAS</b> | 578.2933 | 606.2882 | <b>DKFGASA</b> | 649.3304 | 677.3253 | <b>KF</b>       | 248.1757 | 276.1707 |
| <b>KFG</b>    | 305.1972 | 333.1921 | <b>KFGA</b>    | 376.2343 | 404.2292 | <b>KFGAS</b>    | 463.2663 | 491.2613 |
| <b>KFGASA</b> | 534.3035 | 562.2984 | <b>KFGASAP</b> | 631.3562 | 659.3511 | <b>FG</b>       | 177.1022 | 205.0972 |
| <b>FGA</b>    | 248.1394 | 276.1343 | <b>FGAS</b>    | 335.1714 | 363.1663 | <b>FGASA</b>    | 406.2085 | 434.2034 |
| <b>FGASAP</b> | 503.2613 | 531.2562 | <b>FGASAPA</b> | 574.2984 | 602.2933 | <b>FGASAPAG</b> | 631.3198 | 659.3148 |
| <b>GA</b>     | 101.0709 | 129.0659 | <b>GAS</b>     | 188.1030 | 216.0979 | <b>GASA</b>     | 259.1401 | 287.1350 |
| <b>GASAP</b>  | 356.1928 | 384.1878 | <b>GASAPA</b>  | 427.2300 | 455.2249 | <b>GASAPAG</b>  | 484.2514 | 512.2463 |
| <b>AS</b>     | 131.0815 | 159.0764 | <b>ASA</b>     | 202.1186 | 230.1135 | <b>ASAP</b>     | 299.1714 | 327.1663 |
| <b>ASAPA</b>  | 370.2085 | 398.2034 | <b>ASAPAG</b>  | 427.2300 | 455.2249 | <b>SA</b>       | 131.0815 | 159.0764 |
| <b>SAP</b>    | 228.1343 | 256.1292 | <b>SAPA</b>    | 299.1714 | 327.1663 | <b>SAPAG</b>    | 356.1928 | 384.1878 |
| <b>AP</b>     | 141.1022 | 169.0972 | <b>APA</b>     | 212.1394 | 240.1343 | <b>APAG</b>     | 269.1608 | 297.1557 |
| <b>PA</b>     | 141.1022 | 169.0972 | <b>PAG</b>     | 198.1237 | 226.1186 | <b>AG</b>       | 101.0709 | 129.0659 |

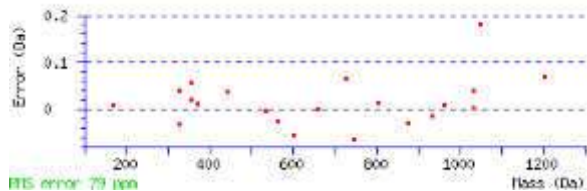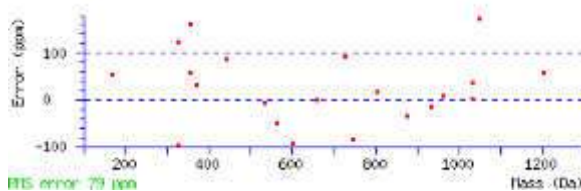

NCBI **BLAST** search of [AIGIDKFGASAPAGK](#)

(Parameters: blastp, nr protein database, expect=20000, no filter, PAM30)

Other BLAST [web gateways](#)

#### All matches to this query

| Score | Mr(calc)  | Delta   | Sequence                        |
|-------|-----------|---------|---------------------------------|
| 31.7  | 1401.7616 | 0.0353  | <a href="#">AIGIDKFGASAPAGK</a> |
| 22.3  | 1401.7073 | 0.0897  | <a href="#">NTRAOANAVSQSR</a>   |
| 17.0  | 1401.7517 | 0.0452  | <a href="#">HAYGTKWSLIAR</a>    |
| 13.8  | 1401.6888 | 0.1081  | <a href="#">WDDIAGLEEAQR</a>    |
| 12.6  | 1401.6597 | 0.1373  | <a href="#">KDAQOGQSDSNVR</a>   |
| 12.5  | 1401.7324 | 0.0645  | <a href="#">OSREGQSOLITR</a>    |
| 11.8  | 1401.6960 | 0.1009  | <a href="#">DSIGVEGSRVNR</a>    |
| 11.3  | 1401.7728 | 0.0241  | <a href="#">VGPLYQSRLVDR</a>    |
| 9.3   | 1401.8344 | -0.0375 | <a href="#">ROSLIFTVTIPK</a>    |
| 8.6   | 1401.6848 | 0.1121  | <a href="#">DADAKOGSNELVR</a>   |

Mascot: <http://www.matrixscience.com/>

**MATRIX SCIENCE Mascot Search Results**

**Peptide View Spot no 112**

**MS/MS Fragmentation of MFGDFQKDTPEER**

Found in **gi28190676** in **NCBI**nr, putative transketolase [Oryza sativa Japonica Group]

Match to Query 132: 1598.764824 from(1599.772100,1+) intensity(0.0000) index(21)

Title: Label: E1, Spot\_Id: 219678, Peak\_List\_Id: 224901, MSMS Job\_Run\_Id: 21757, Comment:

Data file C:\Documents and Settings\Administrator\Desktop\farah BHU\spot set plate\Farah-Garima 11May 2013\ppw\_E1\_136842029000.txt

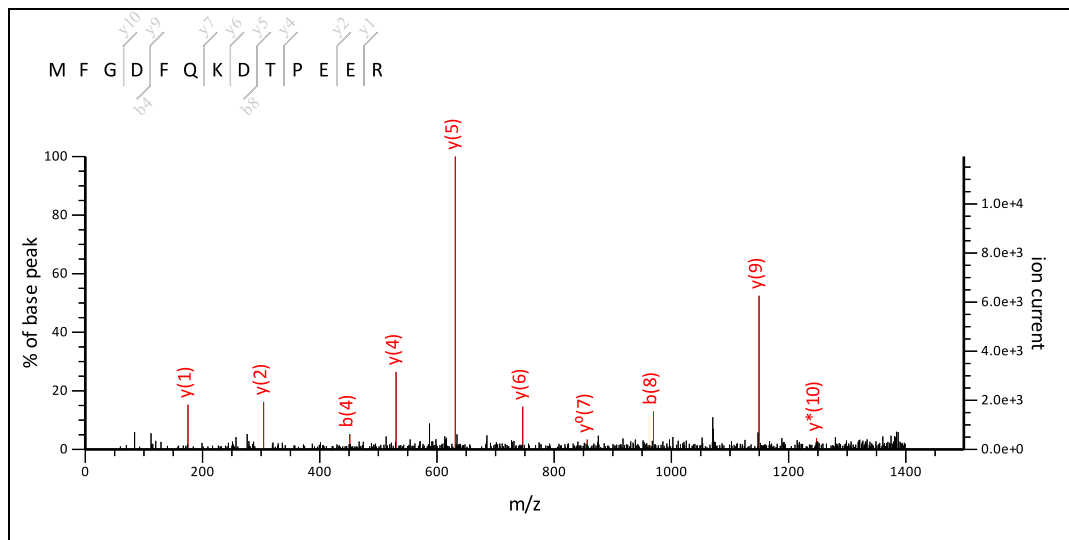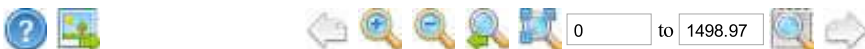

Label all possible matches  Label matches used for scoring

Monoisotopic mass of neutral peptide Mr(calc): 1598.7035

Fixed modifications: Carbamidomethyl (C) (apply to specified residues or termini only)

Ions Score: 41 Expect: 0.14

Matches : 11/210 fragment ions using 14 most intense peaks [\(help\)](#)

| #  | Immon.   | a         | a*        | a <sup>0</sup> | b               | b*        | b <sup>0</sup>   | d         | d'        | Seq. | v         | w         | w'       | y                | y*               |
|----|----------|-----------|-----------|----------------|-----------------|-----------|------------------|-----------|-----------|------|-----------|-----------|----------|------------------|------------------|
| 1  | 104.0528 | 104.0528  |           |                | 132.0478        |           |                  | 44.0495   |           | M    |           |           |          |                  |                  |
| 2  | 120.0808 | 251.1213  |           |                | 279.1162        |           |                  |           |           | F    | 1376.6077 |           |          | 1468.6703        | 1451.6438        |
| 3  | 30.0338  | 308.1427  |           |                | 336.1376        |           |                  |           |           | G    |           |           |          | 1321.6019        | 1304.5753        |
| 4  | 88.0393  | 423.1697  |           | 405.1591       | <b>451.1646</b> |           | 433.1540         | 379.1798  |           | D    | 1204.5593 | 1203.5640 |          | 1264.5804        | <b>1247.5539</b> |
| 5  | 120.0808 | 570.2381  |           | 552.2275       | 598.2330        |           | 580.2224         |           |           | F    | 1057.4909 |           |          | <b>1149.5535</b> | 1132.5269        |
| 6  | 101.0709 | 698.2967  | 681.2701  | 680.2861       | 726.2916        | 709.2650  | 708.2810         | 641.2752  |           | Q    | 929.4323  | 928.4371  |          | 1002.4851        | 985.4585         |
| 7  | 101.1073 | 826.3916  | 809.3651  | 808.3811       | 854.3865        | 837.3600  | 836.3760         | 769.3338  |           | K    | 801.3373  | 800.3421  |          | 874.4265         | 857.3999         |
| 8  | 88.0393  | 941.4186  | 924.3920  | 923.4080       | <b>969.4135</b> | 952.3869  | 951.4029         | 897.4287  |           | D    | 686.3104  | 685.3151  |          | <b>746.3315</b>  | 729.3050         |
| 9  | 74.0600  | 1042.4662 | 1025.4397 | 1024.4557      | 1070.4612       | 1053.4346 | 1052.4506        | 1026.4713 | 1028.4506 | T    | 585.2627  | 598.2831  | 600.2624 | <b>631.3046</b>  | 614.2780         |
| 10 | 70.0651  | 1139.5190 | 1122.4925 | 1121.5084      | 1167.5139       | 1150.4874 | <b>1149.5034</b> | 1113.5034 |           | P    | 488.2100  | 487.2147  |          | <b>530.2569</b>  | 513.2304         |
| 11 | 102.0550 | 1268.5616 | 1251.5351 | 1250.5510      | 1296.5565       | 1279.5300 | 1278.5460        | 1210.5561 |           | E    | 359.1674  | 358.1721  |          | 433.2041         | 416.1776         |
| 12 | 102.0550 | 1397.6042 | 1380.5776 | 1379.5936      | 1425.5991       | 1408.5726 | 1407.5885        | 1339.5987 |           | E    | 230.1248  | 229.1295  |          | <b>304.1615</b>  | 287.1350         |
| 13 | 129.1135 |           |           |                |                 |           |                  |           |           | R    | 74.0237   | 73.0284   |          | <b>175.1190</b>  | 158.0924         |

| Seq    | ya       | yb       | Seq    | ya       | yb       | Seq    | ya       | yb       |
|--------|----------|----------|--------|----------|----------|--------|----------|----------|
| FG     | 177.1022 | 205.0972 | FGD    | 292.1292 | 320.1241 | FGDF   | 439.1976 | 467.1925 |
| FGDFQ  | 567.2562 | 595.2511 | FGDFQK | 695.3511 | 723.3461 | GD     | 145.0608 | 173.0557 |
| GDF    | 292.1292 | 320.1241 | GDFQ   | 420.1878 | 448.1827 | GDFQK  | 548.2827 | 576.2776 |
| GDFQKD | 663.3097 | 691.3046 | DF     | 235.1077 | 263.1026 | DFQ    | 363.1663 | 391.1612 |
| DFQK   | 491.2613 | 519.2562 | DFQKD  | 606.2882 | 634.2831 | FQ     | 248.1394 | 276.1343 |
| FQK    | 376.2343 | 404.2292 | FQKD   | 491.2613 | 519.2562 | FQKDT  | 592.3089 | 620.3039 |
| FQKDT  | 689.3617 | 717.3566 | QK     | 229.1659 | 257.1608 | QKD    | 344.1928 | 372.1878 |
| QKDT   | 445.2405 | 473.2354 | QKDT   | 542.2933 | 570.2882 | QKDTPE | 671.3359 | 699.3308 |



|              |          |          |               |          |          |              |          |          |
|--------------|----------|----------|---------------|----------|----------|--------------|----------|----------|
| <b>KD</b>    | 216.1343 | 244.1292 | <b>KDT</b>    | 317.1819 | 345.1769 | <b>KDTP</b>  | 414.2347 | 442.2296 |
| <b>KDTPE</b> | 543.2773 | 571.2722 | <b>KDTPEE</b> | 672.3199 | 700.3148 | <b>DT</b>    | 189.0870 | 217.0819 |
| <b>DTP</b>   | 286.1397 | 314.1347 | <b>DTPE</b>   | 415.1823 | 443.1773 | <b>DTPEE</b> | 544.2249 | 572.2198 |
| <b>TP</b>    | 171.1128 | 199.1077 | <b>TPE</b>    | 300.1554 | 328.1503 | <b>TPEE</b>  | 429.1980 | 457.1929 |
| <b>PE</b>    | 199.1077 | 227.1026 | <b>PEE</b>    | 328.1503 | 356.1452 | <b>EE</b>    | 231.0975 | 259.0925 |

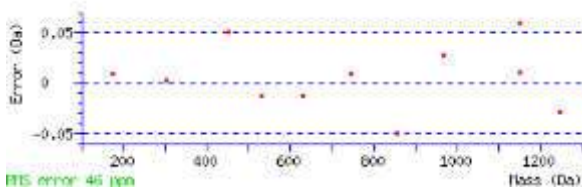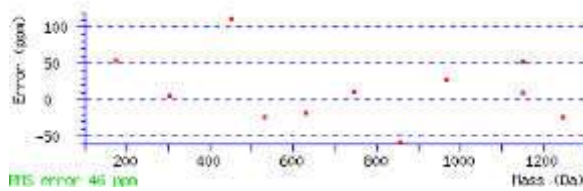

NCBI **BLAST** search of [MFGDFOKDTPPEER](#)

(Parameters: blastp, nr protein database, expect=20000, no filter, PAM30)

Other BLAST [web gateways](#)

#### All matches to this query

| Score | Mr(calc)  | Delta   | Sequence                        |
|-------|-----------|---------|---------------------------------|
| 41.3  | 1598.7035 | 0.0613  | <a href="#">MFGDFOKDTPPEER</a>  |
| 15.8  | 1598.7134 | 0.0514  | <a href="#">LYSMEDVDEVVER</a>   |
| 15.3  | 1598.8053 | -0.0404 | <a href="#">LSGSLLFHNTPEER</a>  |
| 14.5  | 1598.8991 | -0.1343 | <a href="#">KAATSATDLKPIVER</a> |
| 14.4  | 1598.9032 | -0.1384 | <a href="#">LLALDGSALPVVFER</a> |
| 14.1  | 1598.8569 | -0.0920 | <a href="#">LQNFKLNYQYLR</a>    |
| 13.8  | 1598.7974 | -0.0326 | <a href="#">MSIDSPDPVLLER</a>   |
| 13.5  | 1598.8879 | -0.1231 | <a href="#">EGKTLVILDDVLER</a>  |
| 13.1  | 1598.8127 | -0.0478 | <a href="#">TTLAFFAGGMLGEIR</a> |
| 12.8  | 1598.8165 | -0.0517 | <a href="#">SODKAOHAFGLLER</a>  |

Mascot: <http://www.matrixscience.com/>

**MATRIX SCIENCE Mascot Search Results**

**Peptide View Spot no 112**

MS/MS Fragmentation of **MFGDFQKDTPPEER**

Found in **gi28190676** in **NCBI**nr, putative transketolase [Oryza sativa Japonica Group]

Match to Query 134: 1614.742524 from(1615.749800,1+) intensity(0.0000) index(22)

Title: Label: E1, Spot\_Id: 219678, Peak\_List\_Id: 224898, MSMS Job\_Run\_Id: 21757, Comment:

Data file C:\Documents and Settings\Administrator\Desktop\farah BHU\spot set plate\Farah-Garima 11May 2013\ppw\_E1\_136842029000.txt

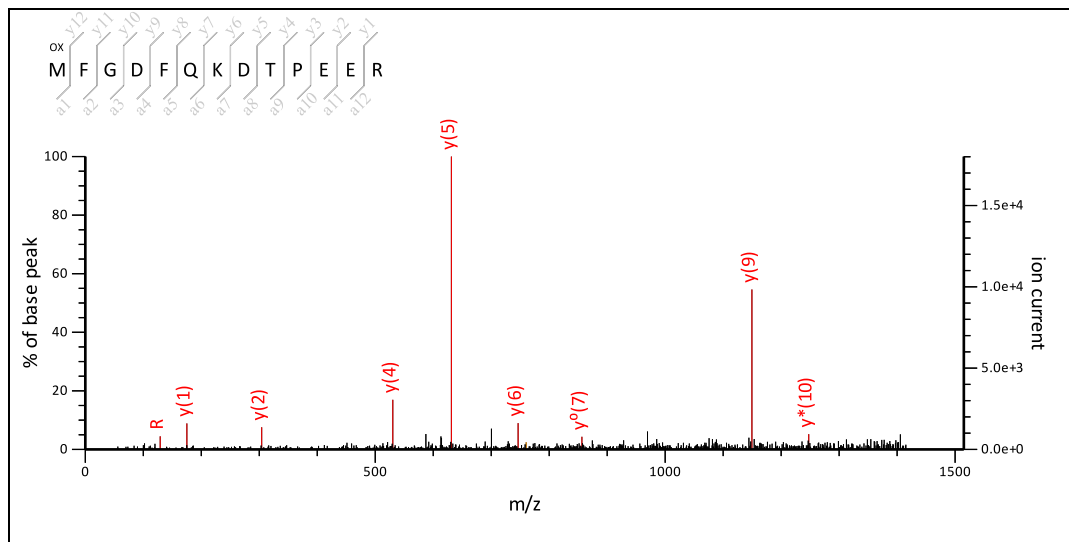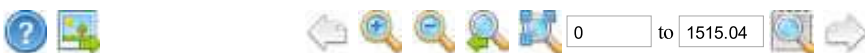

Label all possible matches  Label matches used for scoring

Monoisotopic mass of neutral peptide Mr(calc): 1614.6984

Fixed modifications: Carbamidomethyl (C) (apply to specified residues or termini only)

Variable modifications:

M1 : Oxidation (M), with neutral losses 0.0000 (shown in table), 63.9983

Ions Score: 39 Expect: 0.22

Matches : 10/276 fragment ions using 14 most intense peaks (help)

| #  | Immon.   | a         | a*        | a <sup>0</sup> | b         | b*        | b <sup>0</sup> | d         | d'        | Seq. | v         | w         | w'       | y         | y*        |
|----|----------|-----------|-----------|----------------|-----------|-----------|----------------|-----------|-----------|------|-----------|-----------|----------|-----------|-----------|
| 1  | 120.0478 | 120.0478  |           |                | 148.0427  |           |                | 44.0495   |           | M    |           |           |          |           |           |
| 2  | 120.0808 | 267.1162  |           |                | 295.1111  |           |                |           |           | F    | 1376.6077 |           |          | 1468.6703 | 1451.6438 |
| 3  | 30.0338  | 324.1376  |           |                | 352.1326  |           |                |           |           | G    |           |           |          | 1321.6019 | 1304.5753 |
| 4  | 88.0393  | 439.1646  |           | 421.1540       | 467.1595  |           | 449.1489       | 395.1748  |           | D    | 1204.5593 | 1203.5640 |          | 1264.5804 | 1247.5539 |
| 5  | 120.0808 | 586.2330  |           | 568.2224       | 614.2279  |           | 596.2173       |           |           | F    | 1057.4909 |           |          | 1149.5535 | 1132.5269 |
| 6  | 101.0709 | 714.2916  | 697.2650  | 696.2810       | 742.2865  | 725.2599  | 724.2759       | 657.2701  |           | Q    | 929.4323  | 928.4371  |          | 1002.4851 | 985.4585  |
| 7  | 101.1073 | 842.3865  | 825.3600  | 824.3760       | 870.3815  | 853.3549  | 852.3709       | 785.3287  |           | K    | 801.3373  | 800.3421  |          | 874.4265  | 857.3999  |
| 8  | 88.0393  | 957.4135  | 940.3869  | 939.4029       | 985.4084  | 968.3818  | 967.3978       | 913.4237  |           | D    | 686.3104  | 685.3151  |          | 746.3315  | 729.3050  |
| 9  | 74.0600  | 1058.4612 | 1041.4346 | 1040.4506      | 1086.4561 | 1069.4295 | 1068.4455      | 1042.4662 | 1044.4455 | T    | 585.2627  | 598.2831  | 600.2624 | 631.3046  | 614.2780  |
| 10 | 70.0651  | 1155.5139 | 1138.4874 | 1137.5034      | 1183.5088 | 1166.4823 | 1165.4983      | 1129.4983 |           | P    | 488.2100  | 487.2147  |          | 530.2569  | 513.2304  |
| 11 | 102.0550 | 1284.5565 | 1267.5300 | 1266.5460      | 1312.5514 | 1295.5249 | 1294.5409      | 1226.5510 |           | E    | 359.1674  | 358.1721  |          | 433.2041  | 416.1776  |
| 12 | 102.0550 | 1413.5991 | 1396.5726 | 1395.5885      | 1441.5940 | 1424.5675 | 1423.5835      | 1355.5936 |           | E    | 230.1248  | 229.1295  |          | 304.1615  | 287.1350  |
| 13 | 129.1135 |           |           |                |           |           |                |           |           | R    | 74.0237   | 73.0284   |          | 175.1190  | 158.0924  |

| Seq    | ya       | yb       | Seq    | ya       | yb       | Seq   | ya       | yb       |
|--------|----------|----------|--------|----------|----------|-------|----------|----------|
| FG     | 177.1022 | 205.0972 | FGD    | 292.1292 | 320.1241 | FGDF  | 439.1976 | 467.1925 |
| FGDFQ  | 567.2562 | 595.2511 | FGDFQK | 695.3511 | 723.3461 | GD    | 145.0608 | 173.0557 |
| GDF    | 292.1292 | 320.1241 | GDFQ   | 420.1878 | 448.1827 | GDFQK | 548.2827 | 576.2776 |
| GDFQKD | 663.3097 | 691.3046 | DF     | 235.1077 | 263.1026 | DFQ   | 363.1663 | 391.1612 |
| DFQK   | 491.2613 | 519.2562 | DFQKD  | 606.2882 | 634.2831 | FQ    | 248.1394 | 276.1343 |

|                        |          |          |                        |          |          |                        |          |          |
|------------------------|----------|----------|------------------------|----------|----------|------------------------|----------|----------|
| <a href="#">FQK</a>    | 376.2343 | 404.2292 | <a href="#">FQKD</a>   | 491.2613 | 519.2562 | <a href="#">FQKDT</a>  | 592.3089 | 620.3039 |
| <a href="#">FQKDTP</a> | 689.3617 | 717.3566 | <a href="#">QK</a>     | 229.1659 | 257.1608 | <a href="#">QKD</a>    | 344.1928 | 372.1878 |
| <a href="#">QKDT</a>   | 445.2405 | 473.2354 | <a href="#">QKDTP</a>  | 542.2933 | 570.2882 | <a href="#">QKDTPE</a> | 671.3359 | 699.3308 |
| <a href="#">KD</a>     | 216.1343 | 244.1292 | <a href="#">KDT</a>    | 317.1819 | 345.1769 | <a href="#">KDTP</a>   | 414.2347 | 442.2296 |
| <a href="#">KDTPE</a>  | 543.2773 | 571.2722 | <a href="#">KDTPEE</a> | 672.3199 | 700.3148 | <a href="#">DT</a>     | 189.0870 | 217.0819 |
| <a href="#">DTP</a>    | 286.1397 | 314.1347 | <a href="#">DTPE</a>   | 415.1823 | 443.1773 | <a href="#">DTPEE</a>  | 544.2249 | 572.2198 |
| <a href="#">TP</a>     | 171.1128 | 199.1077 | <a href="#">TPE</a>    | 300.1554 | 328.1503 | <a href="#">TPEE</a>   | 429.1980 | 457.1929 |
| <a href="#">PE</a>     | 199.1077 | 227.1026 | <a href="#">PEE</a>    | 328.1503 | 356.1452 | <a href="#">EE</a>     | 231.0975 | 259.0925 |

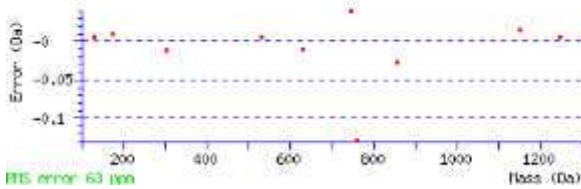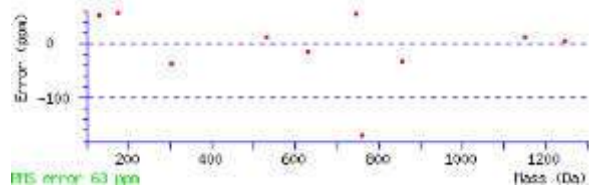

NCBI BLAST search of [MFGDFOKDTPEER](#)

(Parameters: blastp, nr protein database, expect=20000, no filter, PAM30)

Other BLAST [web gateways](#)

#### All matches to this query

| Score | Mr(calc)  | Delta   | Sequence                        |
|-------|-----------|---------|---------------------------------|
| 38.9  | 1614.6984 | 0.0441  | <a href="#">MFGDFOKDTPEER</a>   |
| 38.9  | 1614.6984 | 0.0441  | <a href="#">MYGDFOKDTPEER</a>   |
| 23.4  | 1614.7599 | -0.0174 | <a href="#">SFFVEMDETIER</a>    |
| 21.1  | 1614.8049 | -0.0624 | <a href="#">RVIOAGCATHAFER</a>  |
| 15.9  | 1614.7083 | 0.0342  | <a href="#">ESSEPESTMFTNLK</a>  |
| 15.9  | 1614.6885 | 0.0540  | <a href="#">QVLAYALDXTXDER</a>  |
| 15.8  | 1614.6791 | 0.0634  | <a href="#">ITSGNMDSSNKESNK</a> |
| 15.6  | 1614.8213 | -0.0788 | <a href="#">ALAISNDNGEIEITR</a> |
| 15.6  | 1614.7485 | -0.0060 | <a href="#">LEDNGVLDEDANGVR</a> |
| 14.3  | 1614.7494 | -0.0069 | <a href="#">SIDGDVTAPMMLHGR</a> |

Mascot: <http://www.matrixscience.com/>

**MATRIX SCIENCE Mascot Search Results**

**Peptide View Spot no 112**

MS/MS Fragmentation of **HVPQGAAFEADWNAK**

Found in **gi28190676** in **NCBI nr**, putative transketolase [Oryza sativa Japonica Group]

Match to Query 138: 1639.816324 from(1640.823600,1+) intensity(0.0000) index(23)

Title: Label: E1, Spot\_Id: 219678, Peak\_List\_Id: 224908, MSMS Job\_Run\_Id: 21757, Comment:

Data file C:\Documents and Settings\Administrator\Desktop\farah BHU\spot set plate\Farah-Garima 11May 2013\ppw\_E1\_136842029000.txt

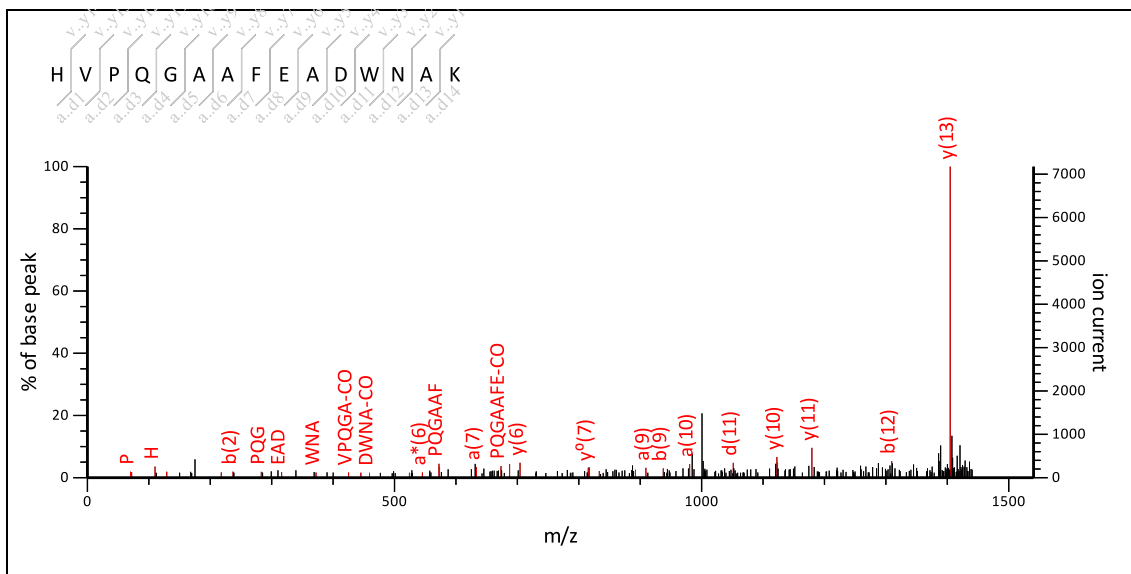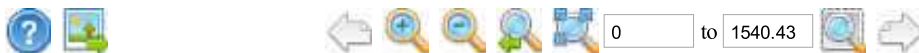

Label all possible matches  Label matches used for scoring

**Monoisotopic mass of neutral peptide Mr(calc):** 1639.7743

**Fixed modifications:** Carbamidomethyl (C) (apply to specified residues or termini only)

**Ions score:** 28 **Expect:** 2.8

**Matches :** 41/246 fragment ions using 94 most intense peaks ([help](#))

| #  | Immon.   | a         | a*        | a <sup>0</sup> | b         | b*        | b <sup>0</sup> | d         | Seq. | v         | w         | y         | y*        | y <sup>0</sup> | #  |
|----|----------|-----------|-----------|----------------|-----------|-----------|----------------|-----------|------|-----------|-----------|-----------|-----------|----------------|----|
| 1  | 110.0713 | 110.0713  |           |                | 138.0662  |           |                | 44.0495   | H    |           |           |           |           |                | 15 |
| 2  | 72.0808  | 209.1397  |           |                | 237.1346  |           |                | 195.1240  | V    | 1459.6601 | 1472.6805 | 1503.7227 | 1486.6961 | 1485.7121      | 14 |
| 3  | 70.0651  | 306.1925  |           |                | 334.1874  |           |                | 280.1768  | P    | 1362.6073 | 1361.6121 | 1404.6543 | 1387.6277 | 1386.6437      | 13 |
| 4  | 101.0709 | 434.2510  | 417.2245  |                | 462.2459  | 445.2194  |                | 377.2296  | Q    | 1234.5487 | 1233.5535 | 1307.6015 | 1290.5749 | 1289.5909      | 12 |
| 5  | 30.0338  | 491.2725  | 474.2459  |                | 519.2674  | 502.2409  |                |           | G    |           |           | 1179.5429 | 1162.5164 | 1161.5323      | 11 |
| 6  | 44.0495  | 562.3096  | 545.2831  |                | 590.3045  | 573.2780  |                |           | A    | 1106.4901 |           | 1122.5214 | 1105.4949 | 1104.5109      | 10 |
| 7  | 44.0495  | 633.3467  | 616.3202  |                | 661.3416  | 644.3151  |                |           | A    | 1035.4530 |           | 1051.4843 | 1034.4578 | 1033.4738      | 9  |
| 8  | 120.0808 | 780.4151  | 763.3886  |                | 808.4100  | 791.3835  |                |           | F    | 888.3846  |           | 980.4472  | 963.4207  | 962.4367       | 8  |
| 9  | 102.0550 | 909.4577  | 892.4312  | 891.4472       | 937.4526  | 920.4261  | 919.4421       | 851.4522  | E    | 759.3420  | 758.3468  | 833.3788  | 816.3523  | 815.3682       | 7  |
| 10 | 44.0495  | 980.4948  | 963.4683  | 962.4843       | 1008.4898 | 991.4632  | 990.4792       |           | A    | 688.3049  |           | 704.3362  | 687.3097  | 686.3256       | 6  |
| 11 | 88.0393  | 1095.5218 | 1078.4952 | 1077.5112      | 1123.5167 | 1106.4902 | 1105.5061      | 1051.5320 | D    | 573.2780  | 572.2827  | 633.2991  | 616.2726  | 615.2885       | 5  |
| 12 | 159.0917 | 1281.6011 | 1264.5745 | 1263.5905      | 1309.5960 | 1292.5695 | 1291.5854      |           | W    | 387.1987  |           | 518.2722  | 501.2456  |                | 4  |
| 13 | 87.0553  | 1395.6440 | 1378.6175 | 1377.6335      | 1423.6389 | 1406.6124 | 1405.6284      | 1352.6382 | N    | 273.1557  | 272.1605  | 332.1928  | 315.1663  |                | 3  |
| 14 | 44.0495  | 1466.6811 | 1449.6546 | 1448.6706      | 1494.6761 | 1477.6495 | 1476.6655      |           | A    | 202.1186  |           | 218.1499  | 201.1234  |                | 2  |
| 15 | 101.1073 |           |           |                |           |           |                |           | K    | 74.0237   | 73.0284   | 147.1128  | 130.0863  |                | 1  |

| Seq   | ya       | yb       | Seq   | ya       | yb       | Seq   | ya       | yb       |
|-------|----------|----------|-------|----------|----------|-------|----------|----------|
| VP    | 169.1335 | 197.1285 | VPQ   | 297.1921 | 325.1870 | VPQG  | 354.2136 | 382.2085 |
| VPQGA | 425.2507 | 453.2456 | VPQGA | 496.2878 | 524.2827 | VPQGA | 643.3562 | 671.3511 |
| PQ    | 198.1237 | 226.1186 | PQG   | 255.1452 | 283.1401 | PQGA  | 326.1823 | 354.1772 |

|                        |                          |                          |                        |                          |                          |                         |                          |          |
|------------------------|--------------------------|--------------------------|------------------------|--------------------------|--------------------------|-------------------------|--------------------------|----------|
| <a href="#">PQGAA</a>  | 397.2194                 | <a href="#">425.2143</a> | <a href="#">PQGAAF</a> | 544.2878                 | <a href="#">572.2827</a> | <a href="#">PQGAAFE</a> | <a href="#">673.3304</a> | 701.3253 |
| <a href="#">QG</a>     | 158.0924                 | 186.0873                 | <a href="#">QGA</a>    | 229.1295                 | 257.1244                 | <a href="#">QGAA</a>    | 300.1666                 | 328.1615 |
| <a href="#">QGAAF</a>  | 447.2350                 | 475.2300                 | <a href="#">QGAAFE</a> | 576.2776                 | 604.2726                 | <a href="#">QGAAFEA</a> | 647.3148                 | 675.3097 |
| <a href="#">GA</a>     | 101.0709                 | <a href="#">129.0659</a> | <a href="#">GAA</a>    | 172.1081                 | 200.1030                 | <a href="#">GAAF</a>    | 319.1765                 | 347.1714 |
| <a href="#">GAAFE</a>  | 448.2191                 | 476.2140                 | <a href="#">GAAFEA</a> | 519.2562                 | 547.2511                 | <a href="#">GAAFEAD</a> | 634.2831                 | 662.2780 |
| <a href="#">AA</a>     | 115.0866                 | 143.0815                 | <a href="#">AAF</a>    | 262.1550                 | 290.1499                 | <a href="#">AAFE</a>    | 391.1976                 | 419.1925 |
| <a href="#">AAFEA</a>  | 462.2347                 | 490.2296                 | <a href="#">AAFEAD</a> | 577.2617                 | 605.2566                 | <a href="#">AF</a>      | 191.1179                 | 219.1128 |
| <a href="#">AFE</a>    | 320.1605                 | 348.1554                 | <a href="#">AFEA</a>   | 391.1976                 | 419.1925                 | <a href="#">AFEAD</a>   | 506.2245                 | 534.2195 |
| <a href="#">AFEADW</a> | 692.3039                 | 720.2988                 | <a href="#">FE</a>     | 249.1234                 | 277.1183                 | <a href="#">FEA</a>     | 320.1605                 | 348.1554 |
| <a href="#">FEAD</a>   | 435.1874                 | 463.1823                 | <a href="#">FEADW</a>  | 621.2667                 | 649.2617                 | <a href="#">EA</a>      | 173.0921                 | 201.0870 |
| <a href="#">EAD</a>    | 288.1190                 | <a href="#">316.1139</a> | <a href="#">EADW</a>   | 474.1983                 | 502.1932                 | <a href="#">EADWN</a>   | 588.2413                 | 616.2362 |
| <a href="#">EADWNA</a> | 659.2784                 | <a href="#">687.2733</a> | <a href="#">AD</a>     | 159.0764                 | 187.0713                 | <a href="#">ADW</a>     | 345.1557                 | 373.1506 |
| <a href="#">ADWN</a>   | <a href="#">459.1987</a> | 487.1936                 | <a href="#">ADWNA</a>  | 530.2358                 | 558.2307                 | <a href="#">DW</a>      | 274.1186                 | 302.1135 |
| <a href="#">DWN</a>    | 388.1615                 | 416.1565                 | <a href="#">DWNA</a>   | <a href="#">459.1987</a> | 487.1936                 | <a href="#">WN</a>      | 273.1346                 | 301.1295 |
| <a href="#">WNA</a>    | 344.1717                 | <a href="#">372.1666</a> | <a href="#">NA</a>     | 158.0924                 | 186.0873                 |                         |                          |          |

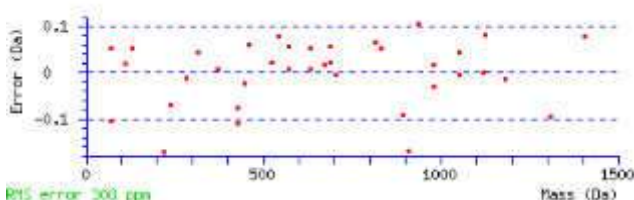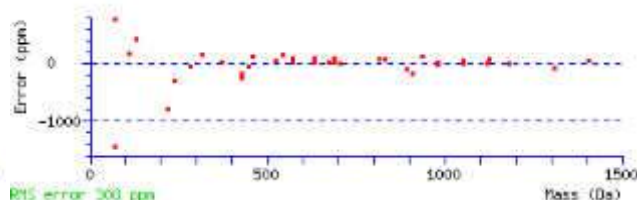

NCBI **BLAST** search of [HVPOGAAFEADWNAK](#)

(Parameters: blastp, nr protein database, expect=20000, no filter, PAM30)

Other BLAST [web gateways](#)

#### All matches to this query

| Score | Mr(calc)  | Delta   | Sequence                           |
|-------|-----------|---------|------------------------------------|
| 27.9  | 1639.7743 | 0.0420  | <a href="#">HVPOGAAFEADWNAK</a>    |
| 19.0  | 1639.8174 | -0.0011 | <a href="#">MSIHTALLCASPSR</a>     |
| 10.9  | 1639.7348 | 0.0815  | <a href="#">VHVHVTGNCEWR</a>       |
| 10.3  | 1639.8716 | -0.0552 | <a href="#">HVALMSELAVISQR</a>     |
| 9.4   | 1639.7069 | 0.1094  | <a href="#">AQVEMEMEAQIDSK</a>     |
| 8.6   | 1639.8781 | -0.0617 | <a href="#">AAAASSLSAPAAPISLDK</a> |
| 8.4   | 1639.8907 | -0.0743 | <a href="#">HARPGSPVPTLAPGGAR</a>  |
| 8.1   | 1639.7698 | 0.0465  | <a href="#">MAIPTSDFLQMNTR</a>     |
| 7.5   | 1639.8682 | -0.0519 | <a href="#">HVFSLGECSPLTVAAR</a>   |
| 7.4   | 1639.7916 | 0.0247  | <a href="#">AELHGDLTETVYMK</a>     |

Mascot: <http://www.matrixscience.com/>


**Mascot Search Results**
**Peptide View**    **Spot no 112**
MS/MS Fragmentation of **SIVSGELPAGWADALPK**Found in **gi28190676** in **NCBI**nr, putative transketolase [Oryza sativa Japonica Group]

Match to Query 145: 1709.934824 from(1710.942100,1+) intensity(0.0000) index(25)

Title: Label: E1, Spot\_Id: 219678, Peak\_List\_Id: 224909, MSMS Job\_Run\_Id: 21757, Comment:

Data file C:\Documents and Settings\Administrator\Desktop\farah BHU\spot set plate\Farah-Garima 11May 2013\ppw\_E1\_136842029000.txt

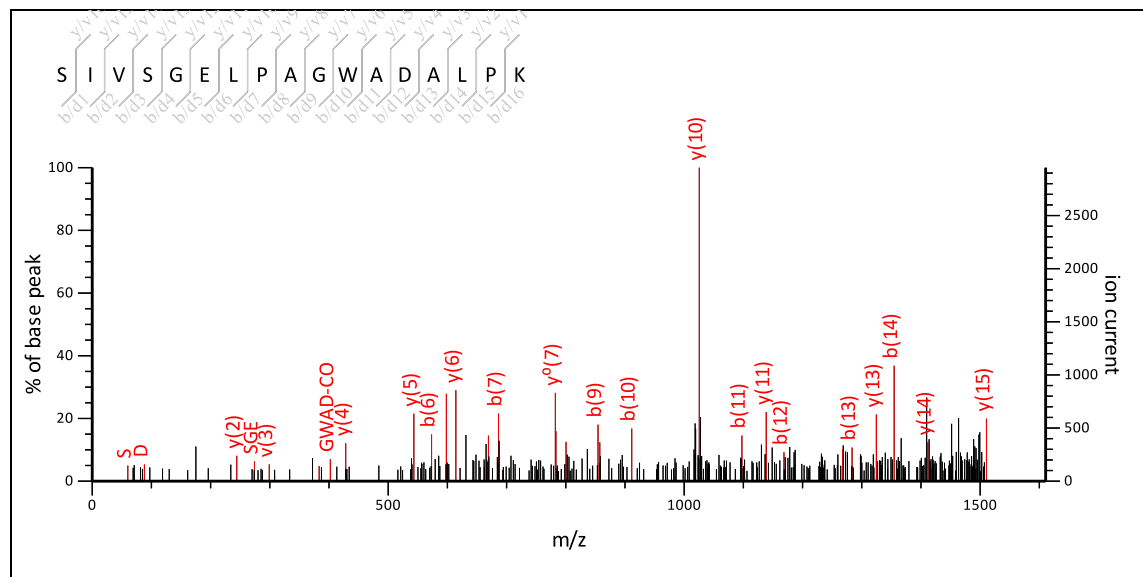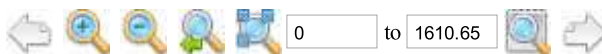Label all possible matches  Label matches used for scoring Monoisotopic mass of neutral peptide  $M_r(\text{calc})$ : 1709.8988

Fixed modifications: Carbamidomethyl (C) (apply to specified residues or termini only)

Ions Score: 62 Expect: 0.0011

Matches : 41/296 fragment ions using 75 most intense peaks ([help](#))

| #  | Immon.         | a         | a <sup>0</sup> | b                | b <sup>0</sup> | d                | d <sup>+</sup> | Seq. | v               | w         | w <sup>+</sup> | y                | y <sup>*</sup>  | y <sup>0</sup>  | #  |
|----|----------------|-----------|----------------|------------------|----------------|------------------|----------------|------|-----------------|-----------|----------------|------------------|-----------------|-----------------|----|
| 1  | 60.0444        | 60.0444   | 42.0338        | <b>88.0393</b>   | 70.0287        | 44.0495          |                | S    |                 |           |                |                  |                 |                 | 17 |
| 2  | 86.0964        | 173.1285  | 155.1179       | 201.1234         | 183.1128       | 145.0972         | 159.1128       | I    | 1565.7958       | 1578.8162 | 1592.8319      | 1623.8741        | 1606.8475       | 1605.8635       | 16 |
| 3  | 72.0808        | 272.1969  | 254.1863       | 300.1918         | 282.1812       | 258.1812         |                | V    | 1466.7274       | 1479.7478 |                | <b>1510.7900</b> | 1493.7635       | 1492.7795       | 15 |
| 4  | 60.0444        | 359.2289  | 341.2183       | 387.2238         | 369.2132       | 343.2340         |                | S    | 1379.6954       | 1378.7001 |                | <b>1411.7216</b> | 1394.6951       | 1393.7110       | 14 |
| 5  | 30.0338        | 416.2504  | 398.2398       | 444.2453         | 426.2347       |                  |                | G    |                 |           |                | <b>1324.6896</b> | 1307.6630       | 1306.6790       | 13 |
| 6  | 102.0550       | 545.2930  | 527.2824       | <b>573.2879</b>  | 555.2773       | 487.2875         |                | E    | 1193.6313       | 1192.6361 |                | <b>1267.6681</b> | 1250.6416       | 1249.6575       | 12 |
| 7  | 86.0964        | 658.3770  | 640.3665       | <b>686.3719</b>  | 668.3614       | 616.3301         |                | L    | 1080.5473       | 1079.5520 |                | <b>1138.6255</b> | 1121.5990       | 1120.6150       | 11 |
| 8  | 70.0651        | 755.4298  | 737.4192       | <b>783.4247</b>  | 765.4141       | 729.4141         |                | P    | 983.4945        | 982.4993  |                | <b>1025.5415</b> | 1008.5149       | 1007.5309       | 10 |
| 9  | 44.0495        | 826.4669  | 808.4563       | <b>854.4618</b>  | 836.4512       |                  |                | A    | 912.4574        |           |                | 928.4887         | <b>911.4621</b> | 910.4781        | 9  |
| 10 | 30.0338        | 883.4884  | 865.4778       | <b>911.4833</b>  | 893.4727       |                  |                | G    |                 |           |                | <b>857.4516</b>  | 840.4250        | 839.4410        | 8  |
| 11 | 159.0917       | 1069.5677 | 1051.5571      | <b>1097.5626</b> | 1079.5520      |                  |                | W    | <b>669.3566</b> |           |                | <b>800.4301</b>  | <b>783.4036</b> | <b>782.4196</b> | 7  |
| 12 | 44.0495        | 1140.6048 | 1122.5942      | <b>1168.5997</b> | 1150.5891      |                  |                | A    | <b>598.3195</b> |           |                | <b>614.3508</b>  | 597.3243        | 596.3402        | 6  |
| 13 | <b>88.0393</b> | 1255.6317 | 1237.6212      | <b>1283.6266</b> | 1265.6161      | 1211.6419        |                | D    | 483.2926        | 482.2973  |                | <b>543.3137</b>  | 526.2871        | 525.3031        | 5  |
| 14 | 44.0495        | 1326.6688 | 1308.6583      | <b>1354.6638</b> | 1336.6532      |                  |                | A    | 412.2554        |           |                | <b>428.2867</b>  | 411.2602        |                 | 4  |
| 15 | 86.0964        | 1439.7529 | 1421.7423      | 1467.7478        | 1449.7373      | 1397.7060        |                | L    | <b>299.1714</b> | 298.1761  |                | 357.2496         | 340.2231        |                 | 3  |
| 16 | 70.0651        | 1536.8057 | 1518.7951      | 1564.8006        | 1546.7900      | <b>1510.7900</b> |                | P    | 202.1186        | 201.1234  |                | <b>244.1656</b>  | 227.1390        |                 | 2  |
| 17 | 101.1073       |           |                |                  |                |                  |                | K    | 74.0237         | 73.0284   |                | 147.1128         | 130.0863        |                 | 1  |

| Seq | ya | yb | Seq | ya | yb | Seq | ya | yb |
|-----|----|----|-----|----|----|-----|----|----|
|     |    |    |     |    |    |     |    |    |

|                 |                 |                 |               |          |                 |                |          |                 |
|-----------------|-----------------|-----------------|---------------|----------|-----------------|----------------|----------|-----------------|
| <b>IV</b>       | 185.1648        | 213.1598        | <b>IVS</b>    | 272.1969 | 300.1918        | <b>IVSG</b>    | 329.2183 | 357.2132        |
| <b>IVSGE</b>    | 458.2609        | 486.2558        | <b>IVSGEL</b> | 571.3450 | 599.3399        | <b>IVSGELP</b> | 668.3978 | 696.3927        |
| <b>VS</b>       | 159.1128        | 187.1077        | <b>VSG</b>    | 216.1343 | <b>244.1292</b> | <b>VSGE</b>    | 345.1769 | 373.1718        |
| <b>VSGEL</b>    | 458.2609        | 486.2558        | <b>VSGELP</b> | 555.3137 | 583.3086        | <b>VSGELPA</b> | 626.3508 | 654.3457        |
| <b>VSGELPAG</b> | 683.3723        | 711.3672        | <b>SG</b>     | 117.0659 | 145.0608        | <b>SGE</b>     | 246.1084 | <b>274.1034</b> |
| <b>SGEL</b>     | 359.1925        | 387.1874        | <b>SGELP</b>  | 456.2453 | 484.2402        | <b>SGELPA</b>  | 527.2824 | 555.2773        |
| <b>SGELPAG</b>  | 584.3039        | 612.2988        | <b>GE</b>     | 159.0764 | 187.0713        | <b>GEL</b>     | 272.1605 | 300.1554        |
| <b>GELP</b>     | 369.2132        | 397.2082        | <b>GELPA</b>  | 440.2504 | 468.2453        | <b>GELPAG</b>  | 497.2718 | 525.2667        |
| <b>GELPAGW</b>  | 683.3511        | 711.3461        | <b>EL</b>     | 215.1390 | 243.1339        | <b>ELP</b>     | 312.1918 | 340.1867        |
| <b>ELPA</b>     | <b>383.2289</b> | 411.2238        | <b>ELPAG</b>  | 440.2504 | 468.2453        | <b>ELPAGW</b>  | 626.3297 | 654.3246        |
| <b>ELPAGWA</b>  | 697.3668        | 725.3617        | <b>LP</b>     | 183.1492 | 211.1441        | <b>LPA</b>     | 254.1863 | 282.1812        |
| <b>LPAG</b>     | 311.2078        | 339.2027        | <b>LPAGW</b>  | 497.2871 | 525.2820        | <b>LPAGWA</b>  | 568.3242 | 596.3191        |
| <b>LPAGWAD</b>  | 683.3511        | 711.3461        | <b>PA</b>     | 141.1022 | 169.0972        | <b>PAG</b>     | 198.1237 | 226.1186        |
| <b>PAGW</b>     | 384.2030        | 412.1979        | <b>PAGWA</b>  | 455.2401 | 483.2350        | <b>PAGWAD</b>  | 570.2671 | <b>598.2620</b> |
| <b>PAGWADA</b>  | 641.3042        | <b>669.2991</b> | <b>AG</b>     | 101.0709 | 129.0659        | <b>AGW</b>     | 287.1503 | 315.1452        |
| <b>AGWA</b>     | 358.1874        | 386.1823        | <b>AGWAD</b>  | 473.2143 | 501.2092        | <b>AGWADA</b>  | 544.2514 | 572.2463        |
| <b>AGWADAL</b>  | 657.3355        | 685.3304        | <b>GW</b>     | 216.1131 | <b>244.1081</b> | <b>GWA</b>     | 287.1503 | 315.1452        |
| <b>GWAD</b>     | <b>402.1772</b> | 430.1721        | <b>GWADA</b>  | 473.2143 | 501.2092        | <b>GWADAL</b>  | 586.2984 | <b>614.2933</b> |
| <b>GWADALP</b>  | 683.3511        | 711.3461        | <b>WA</b>     | 230.1288 | 258.1237        | <b>WAD</b>     | 345.1557 | 373.1506        |
| <b>WADA</b>     | 416.1928        | 444.1878        | <b>WADAL</b>  | 529.2769 | 557.2718        | <b>WADALP</b>  | 626.3297 | 654.3246        |
| <b>AD</b>       | 159.0764        | 187.0713        | <b>ADA</b>    | 230.1135 | 258.1084        | <b>ADAL</b>    | 343.1976 | 371.1925        |
| <b>ADALP</b>    | 440.2504        | 468.2453        | <b>DA</b>     | 159.0764 | 187.0713        | <b>DAL</b>     | 272.1605 | 300.1554        |
| <b>DALP</b>     | 369.2132        | 397.2082        | <b>AL</b>     | 157.1335 | 185.1285        | <b>ALP</b>     | 254.1863 | 282.1812        |
| <b>LP</b>       | 183.1492        | 211.1441        |               |          |                 |                |          |                 |

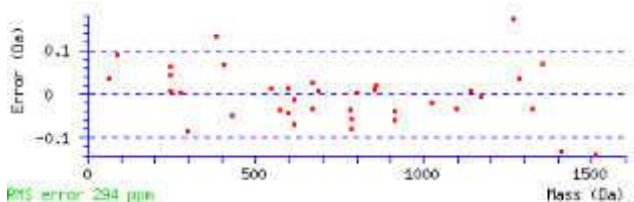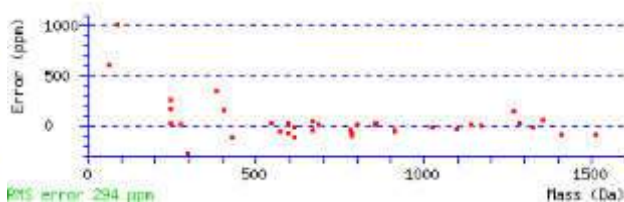

NCBI BLAST search of [SIVSGELPAGWADALPK](#)  
 (Parameters: blastp, nr protein database, expect=20000, no filter, PAM30)  
 Other BLAST [web gateways](#)

All matches to this query

| Score | Mr(calc)  | Delta   | Sequence                          |
|-------|-----------|---------|-----------------------------------|
| 61.8  | 1709.8988 | 0.0360  | <a href="#">SIVSGELPAGWADALPK</a> |
| 38.2  | 1709.8697 | 0.0652  | <a href="#">VSDLSSPDQPASPRVR</a>  |
| 27.2  | 1709.9213 | 0.0135  | <a href="#">GLDADAATPVARWLVR</a>  |
| 21.2  | 1709.8696 | 0.0652  | <a href="#">SLEAEAGITGPAADPRR</a> |
| 19.0  | 1709.9617 | -0.0269 | <a href="#">GWLSLALVIGSPWGVR</a>  |
| 19.0  | 1709.7721 | 0.1627  | <a href="#">MPMSMSTMLPGSPRR</a>   |
| 19.0  | 1709.7721 | 0.1627  | <a href="#">MPMSMSTMLPGSPRR</a>   |
| 17.2  | 1709.7721 | 0.1627  | <a href="#">MPMSMSTMLPGSPRR</a>   |
| 16.1  | 1709.9213 | 0.0135  | <a href="#">DAGALLGAIPHPAAPSR</a> |
| 16.1  | 1709.9788 | -0.0440 | <a href="#">ANVTGIILDOGKAVGVR</a> |

Mascot: <http://www.matrixscience.com/>



**MATRIX SCIENCE Mascot Search Results**

**Peptide View Spot no 112**

**MS/MS Fragmentation of IYQEYGITAVIAATAK**

Found in **gi28190676** in **NCBI**nr, putative transketolase [Oryza sativa Japonica Group]

Match to Query 155: 1883.010524 from(1884.017800,1+) intensity(0.0000) index(28)

Title: Label: E1, Spot\_Id: 219678, Peak\_List\_Id: 224905, MSMS Job\_Run\_Id: 21757, Comment:

Data file C:\Documents and Settings\Administrator\Desktop\farah BHU\spot set plate\Farah-Garima 11May 2013\ppw\_E1\_136842029000.txt

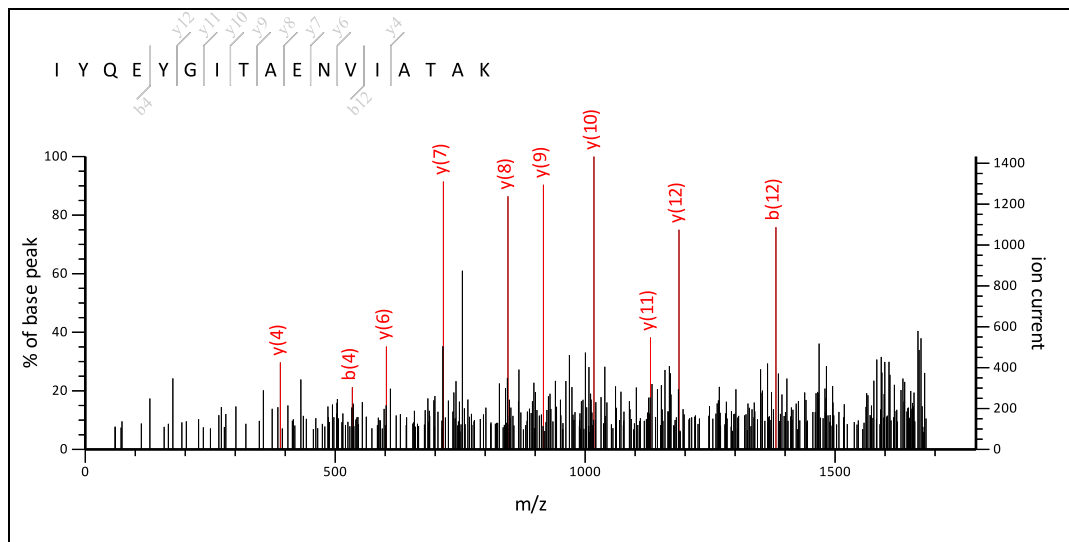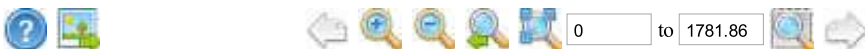

Label all possible matches  Label matches used for scoring

**Monoisotopic mass of neutral peptide Mr(calc):** 1882.9676

**Fixed modifications:** Carbamidomethyl (C) (apply to specified residues or termini only)

**Ions Score:** 52 **Expect:** 0.0095

**Matches:** 10/318 fragment ions using 17 most intense peaks ([help](#))

| #  | Immon.   | a         | a*        | a <sup>0</sup> | b                | b*        | b <sup>0</sup> | d         | d'        | Seq. | v         | w         | w'        | y                | y*        |
|----|----------|-----------|-----------|----------------|------------------|-----------|----------------|-----------|-----------|------|-----------|-----------|-----------|------------------|-----------|
| 1  | 86.0964  | 86.0964   |           |                | 114.0913         |           |                | 44.0495   |           | I    |           |           |           |                  |           |
| 2  | 136.0757 | 249.1598  |           |                | 277.1547         |           |                |           |           | Y    | 1662.8333 |           |           | 1770.8909        | 1753.8643 |
| 3  | 101.0709 | 377.2183  | 360.1918  |                | 405.2132         | 388.1867  |                | 320.1969  |           | Q    | 1534.7748 | 1533.7795 |           | 1607.8275        | 1590.8010 |
| 4  | 102.0550 | 506.2609  | 489.2344  | 488.2504       | <b>534.2558</b>  | 517.2293  | 516.2453       | 448.2554  |           | E    | 1405.7322 | 1404.7369 |           | 1479.7690        | 1462.7424 |
| 5  | 136.0757 | 669.3243  | 652.2977  | 651.3137       | 697.3192         | 680.2926  | 679.3086       |           |           | Y    | 1242.6688 |           |           | 1350.7264        | 1333.6998 |
| 6  | 30.0338  | 726.3457  | 709.3192  | 708.3352       | 754.3406         | 737.3141  | 736.3301       |           |           | G    |           |           |           | <b>1187.6630</b> | 1170.6365 |
| 7  | 86.0964  | 839.4298  | 822.4032  | 821.4192       | 867.4247         | 850.3981  | 849.4141       | 811.3985  | 825.4141  | I    | 1072.5633 | 1085.5837 | 1099.5994 | <b>1130.6416</b> | 1113.6150 |
| 8  | 74.0600  | 940.4775  | 923.4509  | 922.4669       | 968.4724         | 951.4458  | 950.4618       | 924.4825  | 926.4618  | T    | 971.5156  | 984.5360  | 986.5153  | <b>1017.5575</b> | 1000.5310 |
| 9  | 44.0495  | 1011.5146 | 994.4880  | 993.5040       | 1039.5095        | 1022.4829 | 1021.4989      |           |           | A    | 900.4785  |           |           | <b>916.5098</b>  | 899.4833  |
| 10 | 102.0550 | 1140.5572 | 1123.5306 | 1122.5466      | 1168.5521        | 1151.5255 | 1150.5415      | 1082.5517 |           | E    | 771.4359  | 770.4407  |           | <b>845.4727</b>  | 828.4462  |
| 11 | 87.0553  | 1254.6001 | 1237.5735 | 1236.5895      | 1282.5950        | 1265.5685 | 1264.5844      | 1211.5943 |           | N    | 657.3930  | 656.3978  |           | <b>716.4301</b>  | 699.4036  |
| 12 | 72.0808  | 1353.6685 | 1336.6420 | 1335.6579      | <b>1381.6634</b> | 1364.6369 | 1363.6529      | 1339.6529 |           | V    | 558.3246  | 571.3450  |           | <b>602.3872</b>  | 585.3606  |
| 13 | 86.0964  | 1466.7526 | 1449.7260 | 1448.7420      | 1494.7475        | 1477.7209 | 1476.7369      | 1438.7213 | 1452.7369 | I    | 445.2405  | 458.2609  | 472.2766  | 503.3188         | 486.2922  |
| 14 | 44.0495  | 1537.7897 | 1520.7631 | 1519.7791      | 1565.7846        | 1548.7581 | 1547.7740      |           |           | A    | 374.2034  |           |           | <b>390.2347</b>  | 373.2082  |
| 15 | 74.0600  | 1638.8374 | 1621.8108 | 1620.8268      | 1666.8323        | 1649.8057 | 1648.8217      | 1622.8425 | 1624.8217 | T    | 273.1557  | 286.1761  | 288.1554  | 319.1976         | 302.1710  |
| 16 | 44.0495  | 1709.8745 | 1692.8479 | 1691.8639      | 1737.8694        | 1720.8428 | 1719.8588      |           |           | A    | 202.1186  |           |           | 218.1499         | 201.1234  |
| 17 | 101.1073 |           |           |                |                  |           |                |           |           | K    | 74.0237   | 73.0284   |           | 147.1128         | 130.0863  |

| Seq   | ya       | yb       | Seq   | ya       | yb       | Seq    | ya       | yb       |
|-------|----------|----------|-------|----------|----------|--------|----------|----------|
| YQ    | 264.1343 | 292.1292 | YQE   | 393.1769 | 421.1718 | YQEY   | 556.2402 | 584.2351 |
| YQEYG | 613.2617 | 641.2566 | QE    | 230.1135 | 258.1084 | QEY    | 393.1769 | 421.1718 |
| QEYG  | 450.1983 | 478.1932 | QEYGI | 563.2824 | 591.2773 | QEYGIT | 664.3301 | 692.3250 |
| EY    | 265.1183 | 293.1132 | EYG   | 322.1397 | 350.1347 | EYGI   | 435.2238 | 463.2187 |

|                         |          |          |                        |          |          |                         |          |          |
|-------------------------|----------|----------|------------------------|----------|----------|-------------------------|----------|----------|
| <a href="#">EYGIT</a>   | 536.2715 | 564.2664 | <a href="#">EYGITA</a> | 607.3086 | 635.3035 | <a href="#">YG</a>      | 193.0972 | 221.0921 |
| <a href="#">YGI</a>     | 306.1812 | 334.1761 | <a href="#">YGIT</a>   | 407.2289 | 435.2238 | <a href="#">YGITA</a>   | 478.2660 | 506.2609 |
| <a href="#">YGITAE</a>  | 607.3086 | 635.3035 | <a href="#">GI</a>     | 143.1179 | 171.1128 | <a href="#">GIT</a>     | 244.1656 | 272.1605 |
| <a href="#">GITA</a>    | 315.2027 | 343.1976 | <a href="#">GITAE</a>  | 444.2453 | 472.2402 | <a href="#">GITAEN</a>  | 558.2882 | 586.2831 |
| <a href="#">GITAENV</a> | 657.3566 | 685.3515 | <a href="#">IT</a>     | 187.1441 | 215.1390 | <a href="#">ITA</a>     | 258.1812 | 286.1761 |
| <a href="#">ITAE</a>    | 387.2238 | 415.2187 | <a href="#">ITAEN</a>  | 501.2667 | 529.2617 | <a href="#">ITAENV</a>  | 600.3352 | 628.3301 |
| <a href="#">TA</a>      | 145.0972 | 173.0921 | <a href="#">TAE</a>    | 274.1397 | 302.1347 | <a href="#">TAEN</a>    | 388.1827 | 416.1776 |
| <a href="#">TAENV</a>   | 487.2511 | 515.2460 | <a href="#">TAENVI</a> | 600.3352 | 628.3301 | <a href="#">TAENVIA</a> | 671.3723 | 699.3672 |
| <a href="#">AE</a>      | 173.0921 | 201.0870 | <a href="#">AEN</a>    | 287.1350 | 315.1299 | <a href="#">AENV</a>    | 386.2034 | 414.1983 |
| <a href="#">AENVI</a>   | 499.2875 | 527.2824 | <a href="#">AENVIA</a> | 570.3246 | 598.3195 | <a href="#">AENVIAT</a> | 671.3723 | 699.3672 |
| <a href="#">EN</a>      | 216.0979 | 244.0928 | <a href="#">ENV</a>    | 315.1663 | 343.1612 | <a href="#">ENVI</a>    | 428.2504 | 456.2453 |
| <a href="#">ENVIA</a>   | 499.2875 | 527.2824 | <a href="#">ENVIAT</a> | 600.3352 | 628.3301 | <a href="#">ENVIATA</a> | 671.3723 | 699.3672 |
| <a href="#">NV</a>      | 186.1237 | 214.1186 | <a href="#">NVI</a>    | 299.2078 | 327.2027 | <a href="#">NVIA</a>    | 370.2449 | 398.2398 |
| <a href="#">NVIAT</a>   | 471.2926 | 499.2875 | <a href="#">NVIATA</a> | 542.3297 | 570.3246 | <a href="#">VI</a>      | 185.1648 | 213.1598 |
| <a href="#">VIA</a>     | 256.2020 | 284.1969 | <a href="#">VIAT</a>   | 357.2496 | 385.2445 | <a href="#">VIATA</a>   | 428.2867 | 456.2817 |
| <a href="#">IA</a>      | 157.1335 | 185.1285 | <a href="#">IAT</a>    | 258.1812 | 286.1761 | <a href="#">IATA</a>    | 329.2183 | 357.2132 |
| <a href="#">AT</a>      | 145.0972 | 173.0921 | <a href="#">ATA</a>    | 216.1343 | 244.1292 | <a href="#">TA</a>      | 145.0972 | 173.0921 |

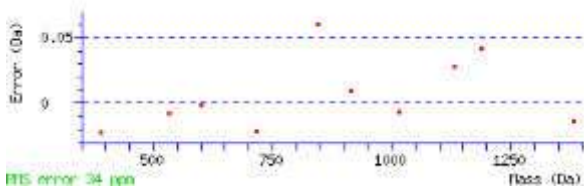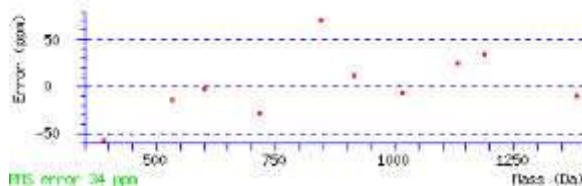

NCBI BLAST search of [IYOEYGITAENVIATAK](#)

(Parameters: blastp, nr protein database, expect=20000, no filter, PAM30)

Other BLAST [web gateways](#)

#### All matches to this query

| Score | Mr(calc)  | Delta   | Sequence                             |
|-------|-----------|---------|--------------------------------------|
| 52.2  | 1882.9676 | 0.0429  | <a href="#">IYOEYGITAENVIATAK</a>    |
| 15.5  | 1883.0815 | -0.0710 | <a href="#">LPLPLYGLAQIMVROR</a>     |
| 12.6  | 1882.8657 | 0.1448  | <a href="#">ITTAENGDPSTATSTNKFSR</a> |
| 9.3   | 1882.8843 | 0.1262  | <a href="#">RMDSSTNEPLFTNVTR</a>     |
| 8.1   | 1882.9206 | 0.0899  | <a href="#">KEAPAAPAMTAAEAAAAEGR</a> |
| 7.6   | 1882.8666 | 0.1440  | <a href="#">NGECGDGLRYLVEMVR</a>     |
| 7.6   | 1882.9312 | 0.0793  | <a href="#">NVYGPVTAAKTIYEDDK</a>    |
| 6.5   | 1883.0000 | 0.0105  | <a href="#">QGTLDPALATAEAGQTVIK</a>  |
| 6.3   | 1882.9975 | 0.0130  | <a href="#">ALTFESLSLAVVVMGTR</a>    |
| 6.1   | 1882.9458 | 0.0647  | <a href="#">MFVKEAQSATIASSIER</a>    |

Mascot: <http://www.matrixscience.com/>

**MATRIX SCIENCE Mascot Search Results**

**Peptide View Spot no 112**

MS/MS Fragmentation of **EVEATRENLGWPYEPFFVPEDEVK**

Found in **gi28190676** in **NCBI**nr, putative transketolase [Oryza sativa Japonica Group]

Match to Query 174: 2750.426324 from(2751.433600,1+) intensity(0.0000) index(34)

Title: Label: E1, Spot\_Id: 219678, Peak\_List\_Id: 224930, MSMS Job\_Run\_Id: 21757, Comment:

Data file C:\Documents and Settings\Administrator\Desktop\farah BHU\spot set plate\Farah-Garima 11May 2013\ppw\_E1\_136842029000.txt

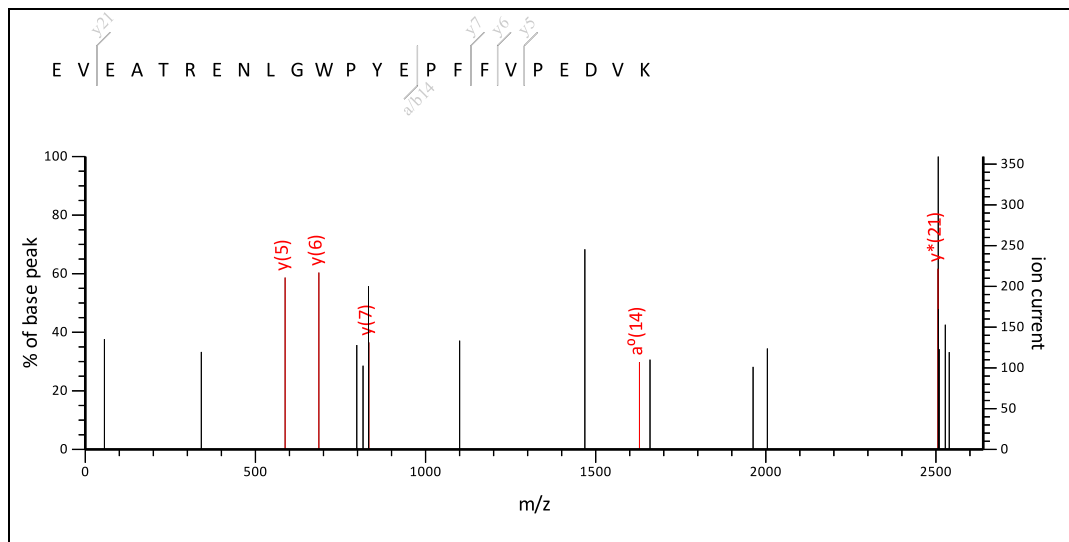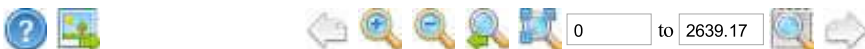

Label all possible matches  Label matches used for scoring

Monoisotopic mass of neutral peptide Mr(calc): 2750.3228

Fixed modifications: Carbamidomethyl (C) (apply to specified residues or termini only)

Ions Score: 3 Expect: 5.4e+02

Matches : 9/425 fragment ions using 14 most intense peaks [\(help\)](#)

| #  | Immon.   | a         | a*        | a <sup>0</sup> | b         | b*        | b <sup>0</sup> | d         | d'       | Seq. | v         | w         | w'        | y         | y*        |
|----|----------|-----------|-----------|----------------|-----------|-----------|----------------|-----------|----------|------|-----------|-----------|-----------|-----------|-----------|
| 1  | 102.0550 | 102.0550  |           | 84.0444        | 130.0499  |           | 112.0393       | 44.0495   |          | E    |           |           |           |           |           |
| 2  | 72.0808  | 201.1234  |           | 183.1128       | 229.1183  |           | 211.1077       | 187.1077  |          | V    | 2578.2249 | 2591.2453 |           | 2622.2875 | 2605.2609 |
| 3  | 102.0550 | 330.1660  |           | 312.1554       | 358.1609  |           | 340.1503       | 272.1605  |          | E    | 2449.1823 | 2448.1870 |           | 2523.2191 | 2506.1925 |
| 4  | 44.0495  | 401.2031  |           | 383.1925       | 429.1980  |           | 411.1874       |           |          | A    | 2378.1452 |           |           | 2394.1765 | 2377.1499 |
| 5  | 74.0600  | 502.2508  |           | 484.2402       | 530.2457  |           | 512.2351       | 486.2558  | 488.2351 | T    | 2277.0975 | 2290.1179 | 2292.0972 | 2323.1394 | 2306.1128 |
| 6  | 129.1135 | 658.3519  | 641.3253  | 640.3413       | 686.3468  | 669.3202  | 668.3362       | 573.2879  |          | R    | 2120.9964 | 2120.0011 |           | 2222.0917 | 2205.0651 |
| 7  | 102.0550 | 787.3945  | 770.3679  | 769.3839       | 815.3894  | 798.3628  | 797.3788       | 729.3890  |          | E    | 1991.9538 | 1990.9585 |           | 2065.9906 | 2048.9640 |
| 8  | 87.0553  | 901.4374  | 884.4108  | 883.4268       | 929.4323  | 912.4058  | 911.4217       | 858.4316  |          | N    | 1877.9109 | 1876.9156 |           | 1936.9480 | 1919.9214 |
| 9  | 86.0964  | 1014.5214 | 997.4949  | 996.5109       | 1042.5164 | 1025.4898 | 1024.5058      | 972.4745  |          | L    | 1764.8268 | 1763.8316 |           | 1822.9051 | 1805.8785 |
| 10 | 30.0338  | 1071.5429 | 1054.5164 | 1053.5323      | 1099.5378 | 1082.5113 | 1081.5273      |           |          | G    |           |           |           | 1709.8210 | 1692.7944 |
| 11 | 159.0917 | 1257.6222 | 1240.5957 | 1239.6117      | 1285.6171 | 1268.5906 | 1267.6066      |           |          | W    | 1521.7260 |           |           | 1652.7995 | 1635.7730 |
| 12 | 70.0651  | 1354.6750 | 1337.6484 | 1336.6644      | 1382.6699 | 1365.6434 | 1364.6593      | 1328.6593 |          | P    | 1424.6733 | 1423.6780 |           | 1466.7202 | 1449.6937 |
| 13 | 136.0757 | 1517.7383 | 1500.7118 | 1499.7278      | 1545.7332 | 1528.7067 | 1527.7227      |           |          | Y    | 1261.6099 |           |           | 1369.6674 | 1352.6409 |
| 14 | 102.0550 | 1646.7809 | 1629.7544 | 1628.7703      | 1674.7758 | 1657.7493 | 1656.7653      | 1588.7754 |          | E    | 1132.5673 | 1131.5721 |           | 1206.6041 | 1189.5776 |
| 15 | 70.0651  | 1743.8337 | 1726.8071 | 1725.8231      | 1771.8286 | 1754.8020 | 1753.8180      | 1717.8180 |          | P    | 1035.5146 | 1034.5193 |           | 1077.5615 | 1060.5350 |
| 16 | 120.0808 | 1890.9021 | 1873.8755 | 1872.8915      | 1918.8970 | 1901.8705 | 1900.8864      |           |          | F    | 888.4462  |           |           | 980.5088  | 963.4822  |
| 17 | 120.0808 | 2037.9705 | 2020.9440 | 2019.9599      | 2065.9654 | 2048.9389 | 2047.9549      |           |          | F    | 741.3777  |           |           | 833.4403  | 816.4138  |
| 18 | 72.0808  | 2137.0389 | 2120.0124 | 2119.0284      | 2165.0338 | 2148.0073 | 2147.0233      | 2123.0233 |          | V    | 642.3093  | 655.3297  |           | 686.3719  | 669.3454  |
| 19 | 70.0651  | 2234.0917 | 2217.0651 | 2216.0811      | 2262.0866 | 2245.0600 | 2244.0760      | 2208.0760 |          | P    | 545.2566  | 544.2613  |           | 587.3035  | 570.2770  |
| 20 | 102.0550 | 2363.1343 | 2346.1077 | 2345.1237      | 2391.1292 | 2374.1026 | 2373.1186      | 2305.1288 |          | E    | 416.2140  | 415.2187  |           | 490.2508  | 473.2242  |
| 21 | 88.0393  | 2478.1612 | 2461.1347 | 2460.1507      | 2506.1561 | 2489.1296 | 2488.1456      | 2434.1714 |          | D    | 301.1870  | 300.1918  |           | 361.2082  | 344.1816  |
| 22 | 72.0808  | 2577.2296 | 2560.2031 | 2559.2191      | 2605.2245 | 2588.1980 | 2587.2140      | 2563.2140 |          | V    | 202.1186  | 215.1390  |           | 246.1812  | 229.1547  |
| 23 | 101.1073 |           |           |                |           |           |                |           |          | K    | 74.0237   | 73.0284   |           | 147.1128  | 130.0863  |

| Seq    | ya       | yb       | Seq    | ya       | yb       | Seq    | ya       | yb       |
|--------|----------|----------|--------|----------|----------|--------|----------|----------|
| VE     | 201.1234 | 229.1183 | VEA    | 272.1605 | 300.1554 | VEAT   | 373.2082 | 401.2031 |
| VEATR  | 529.3093 | 557.3042 | VEATRE | 658.3519 | 686.3468 | EA     | 173.0921 | 201.0870 |
| EAT    | 274.1397 | 302.1347 | EATR   | 430.2409 | 458.2358 | EATRE  | 559.2835 | 587.2784 |
| EATREN | 673.3264 | 701.3213 | AT     | 145.0972 | 173.0921 | ATR    | 301.1983 | 329.1932 |
| ATRE   | 430.2409 | 458.2358 | ATREN  | 544.2838 | 572.2787 | ATRENL | 657.3678 | 685.3628 |
| TR     | 230.1612 | 258.1561 | TRE    | 359.2037 | 387.1987 | TREN   | 473.2467 | 501.2416 |
| TRENL  | 586.3307 | 614.3256 | TRENLG | 643.3522 | 671.3471 | RE     | 258.1561 | 286.1510 |
| REN    | 372.1990 | 400.1939 | RENL   | 485.2831 | 513.2780 | RENLG  | 542.3045 | 570.2994 |
| EN     | 216.0979 | 244.0928 | ENL    | 329.1819 | 357.1769 | ENLG   | 386.2034 | 414.1983 |
| ENLGW  | 572.2827 | 600.2776 | ENLGWP | 669.3355 | 697.3304 | NL     | 200.1394 | 228.1343 |
| NLG    | 257.1608 | 285.1557 | NLGW   | 443.2401 | 471.2350 | NLGWP  | 540.2929 | 568.2878 |
| LG     | 143.1179 | 171.1128 | LGW    | 329.1972 | 357.1921 | LGWP   | 426.2500 | 454.2449 |
| LGWPY  | 589.3133 | 617.3082 | GW     | 216.1131 | 244.1081 | GWP    | 313.1659 | 341.1608 |
| GWPY   | 476.2292 | 504.2241 | GWPYE  | 605.2718 | 633.2667 | WP     | 256.1444 | 284.1394 |
| WPY    | 419.2078 | 447.2027 | WPYE   | 548.2504 | 576.2453 | WPYEP  | 645.3031 | 673.2980 |
| PY     | 233.1285 | 261.1234 | PYE    | 362.1710 | 390.1660 | PYEP   | 459.2238 | 487.2187 |
| PYEPF  | 606.2922 | 634.2871 | YE     | 265.1183 | 293.1132 | YEP    | 362.1710 | 390.1660 |
| YEPF   | 509.2395 | 537.2344 | YEPFF  | 656.3079 | 684.3028 | EP     | 199.1077 | 227.1026 |
| EPF    | 346.1761 | 374.1710 | EPFF   | 493.2445 | 521.2395 | EPFFV  | 592.3130 | 620.3079 |
| EPFFVP | 689.3657 | 717.3606 | PF     | 217.1335 | 245.1285 | PFV    | 364.2020 | 392.1969 |
| PFV    | 463.2704 | 491.2653 | PFVVP  | 560.3231 | 588.3180 | PFVPE  | 689.3657 | 717.3606 |
| FF     | 267.1492 | 295.1441 | FFV    | 366.2176 | 394.2125 | FFVP   | 463.2704 | 491.2653 |
| FFVPE  | 592.3130 | 620.3079 | FV     | 219.1492 | 247.1441 | FVP    | 316.2020 | 344.1969 |
| FVPE   | 445.2445 | 473.2395 | FVPED  | 560.2715 | 588.2664 | FVPEDV | 659.3399 | 687.3348 |
| VP     | 169.1335 | 197.1285 | VPE    | 298.1761 | 326.1710 | VPED   | 413.2031 | 441.1980 |
| VPEDV  | 512.2715 | 540.2664 | PE     | 199.1077 | 227.1026 | PED    | 314.1347 | 342.1296 |
| PEDV   | 413.2031 | 441.1980 | ED     | 217.0819 | 245.0768 | EDV    | 316.1503 | 344.1452 |
| DV     | 187.1077 | 215.1026 |        |          |          |        |          |          |

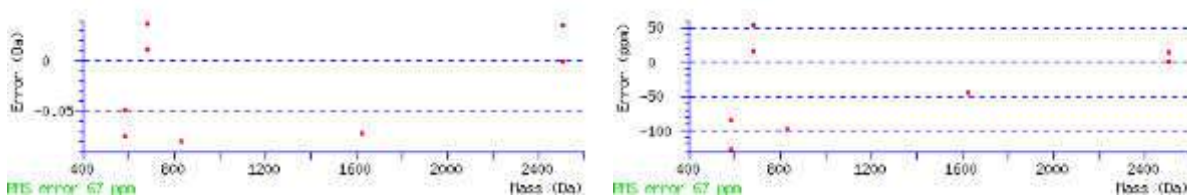

NCBI BLAST search of [EVEATRENLGWPYEPFFVPELVK](#)  
 (Parameters: blastp, nr protein database, expect=20000, no filter, PAM30)  
 Other BLAST [web gateways](#)

All matches to this query

| Score | Mr(calc)  | Delta   | Sequence                                  |
|-------|-----------|---------|-------------------------------------------|
| 2.8   | 2750.3228 | 0.1035  | <a href="#">EVEATRENLGWPYEPFFVPELVK</a>   |
| 2.2   | 2750.3421 | 0.0842  | <a href="#">ESGTFAGRRPCYFNTGVMVLDLAR</a>  |
| 0.8   | 2750.3746 | 0.0517  | <a href="#">MAAWWCFALLLVLCAPAGADVSKGK</a> |
| 0.8   | 2750.4136 | 0.0128  | <a href="#">TDIVASSTGFGPPVMPFAKMLVNSR</a> |
| 0.8   | 2750.2543 | 0.1721  | <a href="#">VECILMGGTFMSLPADYHDIYFIR</a>  |
| 0.3   | 2750.3320 | 0.0943  | <a href="#">DGDGIEVFLALDESSMLTLOONLDK</a> |
| 0.3   | 2750.4643 | -0.0380 | <a href="#">ELEKVLGGKPYLGNDTFGFVDIALR</a> |
| 0.3   | 2750.4778 | -0.0515 | <a href="#">GVIGLVVFFFVGVAFDKLWTR</a>     |
| 0.3   | 2750.5862 | -0.1599 | <a href="#">LIFAAVVFMGLAFLAFLVLRPTR</a>   |
| 0.3   | 2750.6114 | -0.1851 | <a href="#">LIFAAVVFMGLAFLVFLVLRPTK</a>   |



# Mascot Search Results

## Peptide View **Spot no 113**

### MS/MS Fragmentation of **NPYWFR**

Found in **gi|28190676** in **NCBI**nr, putative transketolase [Oryza sativa Japonica Group]

Match to Query 13: 995.495594 from(996.502870,1+) intensity(0.0000) index(4)

Title: Label: D1, Spot\_Id: 219677, Peak\_List\_Id: 224867, MSMS Job\_Run\_Id: 21756, Comment:

Data file C:\Documents and Settings\Administrator\Desktop\farah BHU\spot set plate\Farah-Garima 11May 2013\ppw\_D1\_136842020900.txt

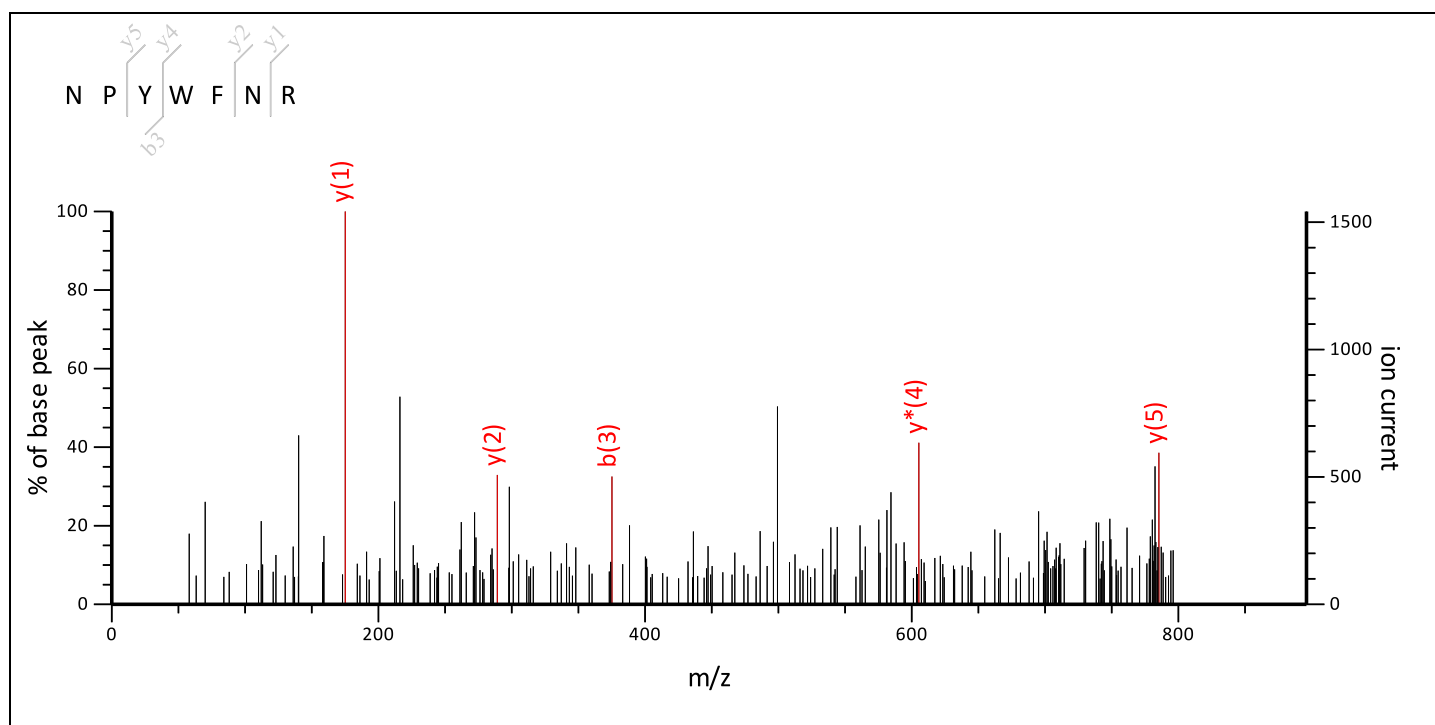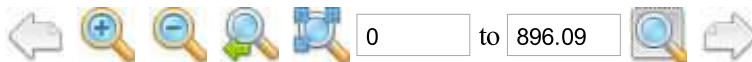

Label all possible matches  Label matches used for scoring

**Monoisotopic mass of neutral peptide Mr(calc):** 995.4613

**Fixed modifications:** Carbamidomethyl (C) (apply to specified residues or termini only)

**Ions Score:** 13 **Expect:** 94

**Matches:** 5/74 fragment ions using 8 most intense peaks ([help](#))

| # | Immon.   | a        | a*       | b               | b*       | d        | Seq. | v        | w        | y               | y*              | # |
|---|----------|----------|----------|-----------------|----------|----------|------|----------|----------|-----------------|-----------------|---|
| 1 | 87.0553  | 87.0553  | 70.0287  | 115.0502        | 98.0237  | 44.0495  | N    |          |          |                 |                 | 7 |
| 2 | 70.0651  | 184.1081 | 167.0815 | 212.1030        | 195.0764 | 158.0924 | P    | 840.3787 | 839.3835 | 882.4257        | 865.3992        | 6 |
| 3 | 136.0757 | 347.1714 | 330.1448 | <b>375.1663</b> | 358.1397 |          | Y    | 677.3154 |          | <b>785.3729</b> | 768.3464        | 5 |
| 4 | 159.0917 | 533.2507 | 516.2241 | 561.2456        | 544.2191 |          | W    | 491.2361 |          | 622.3096        | <b>605.2831</b> | 4 |
| 5 | 120.0808 | 680.3191 | 663.2926 | 708.3140        | 691.2875 |          | F    | 344.1677 |          | 436.2303        | 419.2037        | 3 |
| 6 | 87.0553  | 794.3620 | 777.3355 | 822.3569        | 805.3304 | 751.3562 | N    | 230.1248 | 229.1295 | <b>289.1619</b> | 272.1353        | 2 |
| 7 | 129.1135 |          |          |                 |          |          | R    | 74.0237  | 73.0284  | <b>175.1190</b> | 158.0924        | 1 |

| Seq          | ya       | yb       | Seq        | ya       | yb       | Seq         | ya       | yb       |
|--------------|----------|----------|------------|----------|----------|-------------|----------|----------|
| <b>PY</b>    | 233.1285 | 261.1234 | <b>PYW</b> | 419.2078 | 447.2027 | <b>PYWF</b> | 566.2762 | 594.2711 |
| <b>PYWFN</b> | 680.3191 | 708.3140 | <b>YW</b>  | 322.1550 | 350.1499 | <b>YWF</b>  | 469.2234 | 497.2183 |
| <b>YWFN</b>  | 583.2663 | 611.2613 | <b>WF</b>  | 306.1601 | 334.1550 | <b>WFN</b>  | 420.2030 | 448.1979 |
| <b>FN</b>    | 234.1237 | 262.1186 |            |          |          |             |          |          |

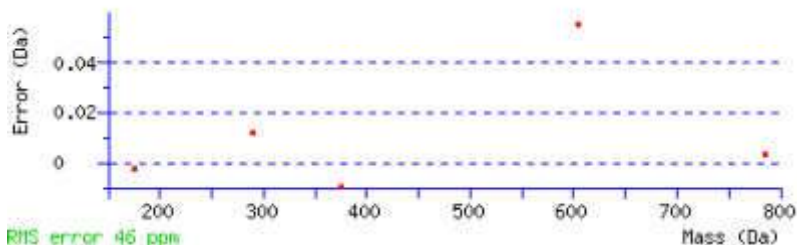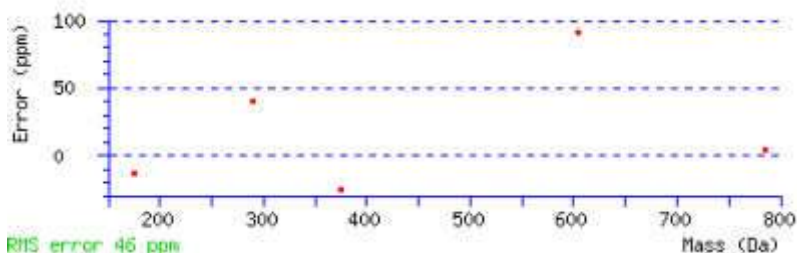

NCBI **BLAST** search of [NPYWFN](#)

(Parameters: blastp, nr protein database, expect=20000, no filter, PAM30)

Other BLAST [web gateways](#)

#### All matches to this query

| Score | Mr(calc) | Delta   | Sequence                    |
|-------|----------|---------|-----------------------------|
| 17.6  | 995.5625 | -0.0669 | <a href="#">TITHRVNR</a>    |
| 15.2  | 995.5148 | -0.0192 | <a href="#">TLRSYNR</a>     |
| 13.1  | 995.4613 | 0.0343  | <a href="#">NPYWFN</a>      |
| 12.0  | 995.5036 | -0.0080 | <a href="#">QSTFSATVR</a>   |
| 11.9  | 995.4131 | 0.0825  | <a href="#">CSSEPFNR</a>    |
| 11.3  | 995.4825 | 0.0131  | <a href="#">VGSGYPFNR</a>   |
| 11.1  | 995.4971 | -0.0015 | <a href="#">MNLGGVHPR</a>   |
| 11.0  | 995.4091 | 0.0865  | <a href="#">GTGGSGTGSCR</a> |
| 10.9  | 995.4495 | 0.0461  | <a href="#">GEIFNCR</a>     |
| 10.7  | 995.5036 | -0.0080 | <a href="#">TISSAFTNR</a>   |

Mascot: <http://www.matrixscience.com/>





# Mascot Search Results

## Peptide View Spot no 113

MS/MS Fragmentation of **YTPESPADATR**Found in **gi28190676** in **NCBI nr**, putative transketolase [Oryza sativa Japonica Group]

Match to Query 45: 1206.583424 from(1207.590700,1+) intensity(0.0000) index(13)

Title: Label: D1, Spot\_Id: 219677, Peak\_List\_Id: 224868, MSMS Job\_Run\_Id: 21756, Comment:

Data file C:\Documents and Settings\Administrator\Desktop\farah BHU\spot set plate\Farah-Garima 11May 2013\ppw\_D1\_136842020900.txt

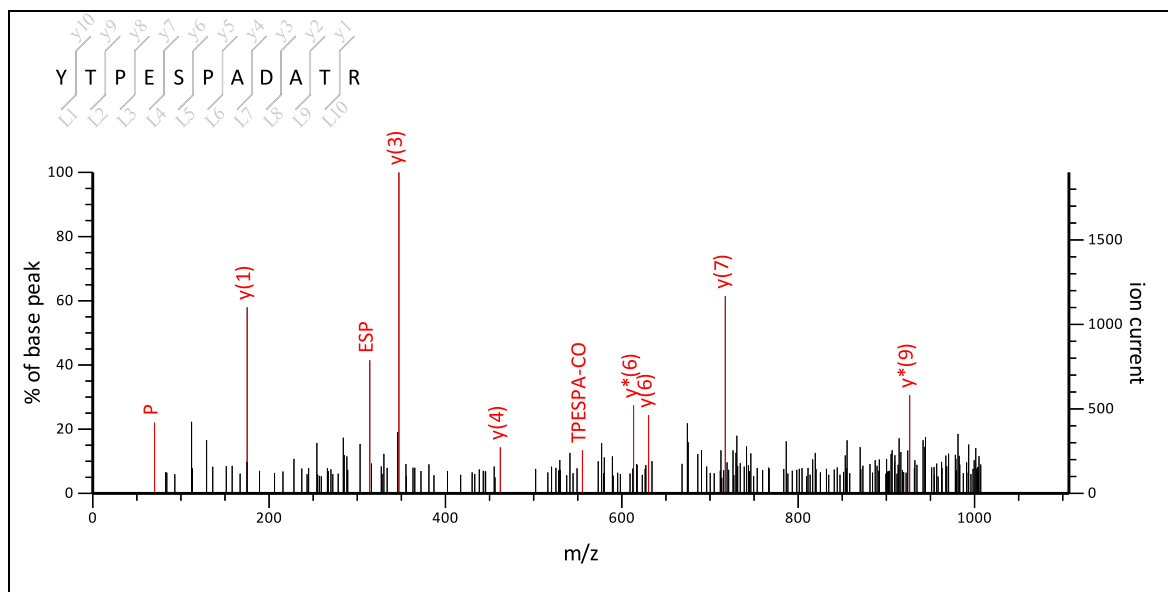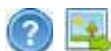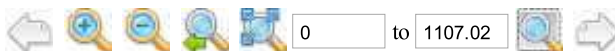Label all possible matches  Label matches used for scoring 

Monoisotopic mass of neutral peptide Mr(calc): 1206.5517

Fixed modifications: Carbamidomethyl (C) (apply to specified residues or termini only)

Ions Score: 24 Expect: 9

Matches: 12/174 fragment ions using 20 most intense peaks ([help](#))

| #  | Immon.         | a         | a <sup>0</sup> | b         | b <sup>0</sup> | d        | d'       | Seq. | v        | w         | w'        | y               | y*              | y <sup>0</sup> | #  |
|----|----------------|-----------|----------------|-----------|----------------|----------|----------|------|----------|-----------|-----------|-----------------|-----------------|----------------|----|
| 1  | 136.0757       | 136.0757  |                | 164.0706  |                | 44.0495  |          | Y    |          |           |           |                 |                 |                | 11 |
| 2  | 74.0600        | 237.1234  | 219.1128       | 265.1183  | 247.1077       | 221.1285 | 223.1077 | T    | 998.4538 | 1011.4742 | 1013.4534 | 1044.4956       | 1027.4691       | 1026.4851      | 10 |
| 3  | <b>70.0651</b> | 334.1761  | 316.1656       | 362.1710  | 344.1605       | 308.1605 |          | P    | 901.4010 | 900.4058  |           | 943.4480        | <b>926.4214</b> | 925.4374       | 9  |
| 4  | 102.0550       | 463.2187  | 445.2082       | 491.2136  | 473.2031       | 405.2132 |          | E    | 772.3584 | 771.3632  |           | 846.3952        | 829.3686        | 828.3846       | 8  |
| 5  | 60.0444        | 550.2508  | 532.2402       | 578.2457  | 560.2351       | 534.2558 |          | S    | 685.3264 | 684.3311  |           | <b>717.3526</b> | 700.3260        | 699.3420       | 7  |
| 6  | <b>70.0651</b> | 647.3035  | 629.2930       | 675.2984  | 657.2879       | 621.2879 |          | P    | 588.2736 | 587.2784  |           | <b>630.3206</b> | <b>613.2940</b> | 612.3100       | 6  |
| 7  | 44.0495        | 718.3406  | 700.3301       | 746.3355  | 728.3250       |          |          | A    | 517.2365 |           |           | 533.2678        | 516.2413        | 515.2572       | 5  |
| 8  | 88.0393        | 833.3676  | 815.3570       | 861.3625  | 843.3519       | 789.3777 |          | D    | 402.2096 | 401.2143  |           | <b>462.2307</b> | 445.2041        | 444.2201       | 4  |
| 9  | 44.0495        | 904.4047  | 886.3941       | 932.3996  | 914.3890       |          |          | A    | 331.1724 |           |           | <b>347.2037</b> | 330.1772        | 329.1932       | 3  |
| 10 | 74.0600        | 1005.4524 | 987.4418       | 1033.4473 | 1015.4367      | 989.4575 | 991.4367 | T    | 230.1248 | 243.1452  | 245.1244  | 276.1666        | 259.1401        | 258.1561       | 2  |
| 11 | 129.1135       |           |                |           |                |          |          | R    | 74.0237  | 73.0284   |           | <b>175.1190</b> | 158.0924        |                | 1  |

| Seq   | ya       | yb       | Seq    | ya              | yb              | Seq     | ya       | yb       |
|-------|----------|----------|--------|-----------------|-----------------|---------|----------|----------|
| TP    | 171.1128 | 199.1077 | TPE    | 300.1554        | 328.1503        | TPES    | 387.1874 | 415.1823 |
| TPESP | 484.2402 | 512.2351 | TPESPA | <b>555.2773</b> | 583.2722        | TPESPAD | 670.3042 | 698.2992 |
| PE    | 199.1077 | 227.1026 | PES    | 286.1397        | <b>314.1347</b> | PESP    | 383.1925 | 411.1874 |
| PESPA | 454.2296 | 482.2245 | PESPAD | 569.2566        | 597.2515        | PESPADA | 640.2937 | 668.2886 |
| ES    | 189.0870 | 217.0819 | ESP    | 286.1397        | <b>314.1347</b> | ESPA    | 357.1769 | 385.1718 |



|                       |          |          |                        |          |          |                         |          |          |
|-----------------------|----------|----------|------------------------|----------|----------|-------------------------|----------|----------|
| <a href="#">ESPAD</a> | 472.2038 | 500.1987 | <a href="#">ESPADA</a> | 543.2409 | 571.2358 | <a href="#">ESPADAT</a> | 644.2886 | 672.2835 |
| <a href="#">SP</a>    | 157.0972 | 185.0921 | <a href="#">SPA</a>    | 228.1343 | 256.1292 | <a href="#">SPAD</a>    | 343.1612 | 371.1561 |
| <a href="#">SPADA</a> | 414.1983 | 442.1932 | <a href="#">SPADAT</a> | 515.2460 | 543.2409 | <a href="#">PA</a>      | 141.1022 | 169.0972 |
| <a href="#">PAD</a>   | 256.1292 | 284.1241 | <a href="#">PADA</a>   | 327.1663 | 355.1612 | <a href="#">PADAT</a>   | 428.2140 | 456.2089 |
| <a href="#">AD</a>    | 159.0764 | 187.0713 | <a href="#">ADA</a>    | 230.1135 | 258.1084 | <a href="#">ADAT</a>    | 331.1612 | 359.1561 |
| <a href="#">DA</a>    | 159.0764 | 187.0713 | <a href="#">DAT</a>    | 260.1241 | 288.1190 | <a href="#">AT</a>      | 145.0972 | 173.0921 |

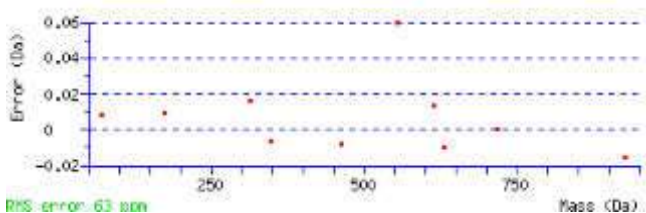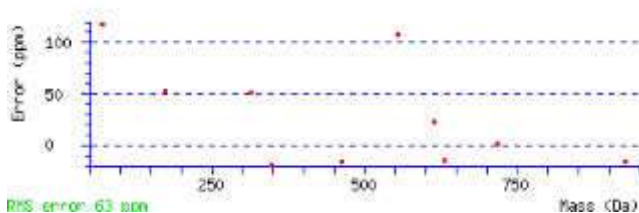

NCBI BLAST search of [YTPESPADATR](#)

(Parameters: blastp, nr protein database, expect=20000, no filter, PAM30)

Other BLAST [web gateways](#)

#### All matches to this query

| Score | Mr(calc)  | Delta   | Sequence                     |
|-------|-----------|---------|------------------------------|
| 23.7  | 1206.5517 | 0.0318  | <a href="#">YTPESPADATR</a>  |
| 13.9  | 1206.5881 | -0.0046 | <a href="#">LLDAVFSDGGR</a>  |
| 8.9   | 1206.6218 | -0.0383 | <a href="#">TNHHSVGTAR</a>   |
| 8.0   | 1206.6721 | -0.0886 | <a href="#">QVRASTSLAFK</a>  |
| 7.9   | 1206.5153 | 0.0681  | <a href="#">EWDDSIDATR</a>   |
| 7.8   | 1206.6357 | -0.0523 | <a href="#">TFEIRTIGDR</a>   |
| 7.8   | 1206.6357 | -0.0523 | <a href="#">TFELRTIGDR</a>   |
| 7.5   | 1206.6244 | -0.0410 | <a href="#">EFLTQLEATR</a>   |
| 7.5   | 1206.5014 | 0.0820  | <a href="#">GHVHDEADGDR</a>  |
| 7.5   | 1206.5485 | 0.0349  | <a href="#">GMIQMIGGGGDR</a> |

Mascot: <http://www.matrixscience.com/>

**MATRIX SCIENCE Mascot Search Results**

**Peptide View Spot no 113**

MS/MS Fragmentation of **AIGIDKFGASAPAGK**

Found in **gi28190676** in **NCBI nr**, putative transketolase [Oryza sativa Japonica Group]

Match to Query 68: 1401.770324 from(1402.777600,1+) intensity(0.0000) index(23)

Title: Label: D1, Spot\_Id: 219677, Peak\_List\_Id: 224877, MSMS Job\_Run\_Id: 21756, Comment:

Data file C:\Documents and Settings\Administrator\Desktop\farah BHU\spot set plate\Farah-Garima 11May 2013\ppw\_D1\_136842020900.txt

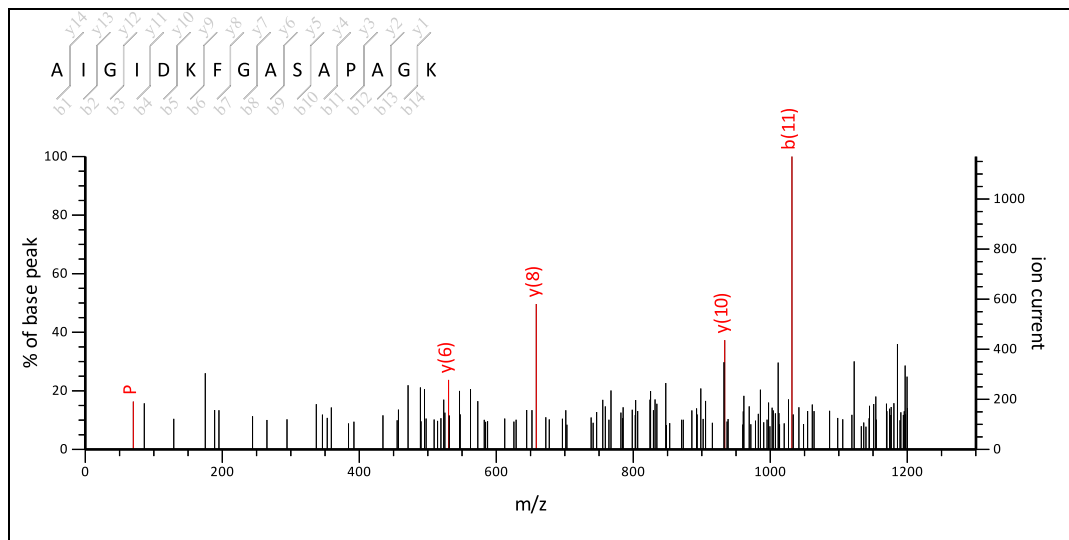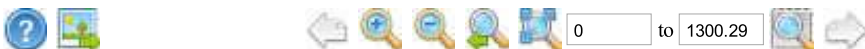

Label all possible matches  Label matches used for scoring

Monoisotopic mass of neutral peptide Mr(calc): 1401.7616

Fixed modifications: Carbamidomethyl (C) (apply to specified residues or termini only)

Ions Score: 5 Expect: 6e+02

Matches : 6/260 fragment ions using 12 most intense peaks ([help](#))

| #  | Immon.   | a         | a*        | a <sup>0</sup> | b         | b*        | b <sup>0</sup> | d         | d'       | Seq. | v         | w         | w'        | y         | y*        |
|----|----------|-----------|-----------|----------------|-----------|-----------|----------------|-----------|----------|------|-----------|-----------|-----------|-----------|-----------|
| 1  | 44.0495  | 44.0495   |           |                | 72.0444   |           |                | 44.0495   |          | A    |           |           |           |           |           |
| 2  | 86.0964  | 157.1335  |           |                | 185.1285  |           |                | 129.1022  | 143.1179 | I    | 1273.6535 | 1286.6739 | 1300.6896 | 1331.7318 | 1314.7052 |
| 3  | 30.0338  | 214.1550  |           |                | 242.1499  |           |                |           |          | G    |           |           |           | 1218.6477 | 1201.6212 |
| 4  | 86.0964  | 327.2391  |           |                | 355.2340  |           |                | 299.2078  | 313.2234 | I    | 1103.5480 | 1116.5684 | 1130.5841 | 1161.6263 | 1144.5997 |
| 5  | 88.0393  | 442.2660  |           | 424.2554       | 470.2609  |           | 452.2504       | 398.2762  |          | D    | 988.5211  | 987.5258  |           | 1048.5422 | 1031.5156 |
| 6  | 101.1073 | 570.3610  | 553.3344  | 552.3504       | 598.3559  | 581.3293  | 580.3453       | 513.3031  |          | K    | 860.4261  | 859.4308  |           | 933.5152  | 916.4887  |
| 7  | 120.0808 | 717.4294  | 700.4028  | 699.4188       | 745.4243  | 728.3978  | 727.4137       |           |          | F    | 713.3577  |           |           | 805.4203  | 788.3937  |
| 8  | 30.0338  | 774.4509  | 757.4243  | 756.4403       | 802.4458  | 785.4192  | 784.4352       |           |          | G    |           |           |           | 658.3519  | 641.3253  |
| 9  | 44.0495  | 845.4880  | 828.4614  | 827.4774       | 873.4829  | 856.4563  | 855.4723       |           |          | A    | 585.2991  |           |           | 601.3304  | 584.3039  |
| 10 | 60.0444  | 932.5200  | 915.4934  | 914.5094       | 960.5149  | 943.4884  | 942.5043       | 916.5251  |          | S    | 498.2671  | 497.2718  |           | 530.2933  | 513.2667  |
| 11 | 44.0495  | 1003.5571 | 986.5306  | 985.5465       | 1031.5520 | 1014.5255 | 1013.5415      |           |          | A    | 427.2300  |           |           | 443.2613  | 426.2347  |
| 12 | 70.0651  | 1100.6099 | 1083.5833 | 1082.5993      | 1128.6048 | 1111.5782 | 1110.5942      | 1074.5942 |          | P    | 330.1772  | 329.1819  |           | 372.2241  | 355.1976  |
| 13 | 44.0495  | 1171.6470 | 1154.6204 | 1153.6364      | 1199.6419 | 1182.6154 | 1181.6313      |           |          | A    | 259.1401  |           |           | 275.1714  | 258.1448  |
| 14 | 30.0338  | 1228.6684 | 1211.6419 | 1210.6579      | 1256.6634 | 1239.6368 | 1238.6528      |           |          | G    |           |           |           | 204.1343  | 187.1077  |
| 15 | 101.1073 |           |           |                |           |           |                |           |          | K    | 74.0237   | 73.0284   |           | 147.1128  | 130.0863  |

| Seq    | ya       | yb       | Seq     | ya       | yb       | Seq   | ya       | yb       |
|--------|----------|----------|---------|----------|----------|-------|----------|----------|
| IG     | 143.1179 | 171.1128 | IGI     | 256.2020 | 284.1969 | IGID  | 371.2289 | 399.2238 |
| IGIDK  | 499.3239 | 527.3188 | IGIDKF  | 646.3923 | 674.3872 | GI    | 143.1179 | 171.1128 |
| GID    | 258.1448 | 286.1397 | GIDK    | 386.2398 | 414.2347 | GIDKF | 533.3082 | 561.3031 |
| GIDKFG | 590.3297 | 618.3246 | GIDKFGA | 661.3668 | 689.3617 | ID    | 201.1234 | 229.1183 |
| IDK    | 329.2183 | 357.2132 | IDKF    | 476.2867 | 504.2817 | IDKFG | 533.3082 | 561.3031 |
| IDKFGA | 604.3453 | 632.3402 | IDKFGAS | 691.3774 | 719.3723 | DK    | 216.1343 | 244.1292 |

|               |          |          |                |          |          |                 |          |          |
|---------------|----------|----------|----------------|----------|----------|-----------------|----------|----------|
| <b>DKF</b>    | 363.2027 | 391.1976 | <b>DKFG</b>    | 420.2241 | 448.2191 | <b>DKFGA</b>    | 491.2613 | 519.2562 |
| <b>DKFGAS</b> | 578.2933 | 606.2882 | <b>DKFGASA</b> | 649.3304 | 677.3253 | <b>KF</b>       | 248.1757 | 276.1707 |
| <b>KFG</b>    | 305.1972 | 333.1921 | <b>KFGA</b>    | 376.2343 | 404.2292 | <b>KFGAS</b>    | 463.2663 | 491.2613 |
| <b>KFGASA</b> | 534.3035 | 562.2984 | <b>KFGASAP</b> | 631.3562 | 659.3511 | <b>FG</b>       | 177.1022 | 205.0972 |
| <b>FGA</b>    | 248.1394 | 276.1343 | <b>FGAS</b>    | 335.1714 | 363.1663 | <b>FGASA</b>    | 406.2085 | 434.2034 |
| <b>FGASAP</b> | 503.2613 | 531.2562 | <b>FGASAPA</b> | 574.2984 | 602.2933 | <b>FGASAPAG</b> | 631.3198 | 659.3148 |
| <b>GA</b>     | 101.0709 | 129.0659 | <b>GAS</b>     | 188.1030 | 216.0979 | <b>GASA</b>     | 259.1401 | 287.1350 |
| <b>GASAP</b>  | 356.1928 | 384.1878 | <b>GASAPA</b>  | 427.2300 | 455.2249 | <b>GASAPAG</b>  | 484.2514 | 512.2463 |
| <b>AS</b>     | 131.0815 | 159.0764 | <b>ASA</b>     | 202.1186 | 230.1135 | <b>ASAP</b>     | 299.1714 | 327.1663 |
| <b>ASAPA</b>  | 370.2085 | 398.2034 | <b>ASAPAG</b>  | 427.2300 | 455.2249 | <b>SA</b>       | 131.0815 | 159.0764 |
| <b>SAP</b>    | 228.1343 | 256.1292 | <b>SAPA</b>    | 299.1714 | 327.1663 | <b>SAPAG</b>    | 356.1928 | 384.1878 |
| <b>AP</b>     | 141.1022 | 169.0972 | <b>APA</b>     | 212.1394 | 240.1343 | <b>APAG</b>     | 269.1608 | 297.1557 |
| <b>PA</b>     | 141.1022 | 169.0972 | <b>PAG</b>     | 198.1237 | 226.1186 | <b>AG</b>       | 101.0709 | 129.0659 |

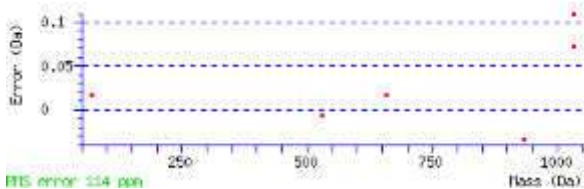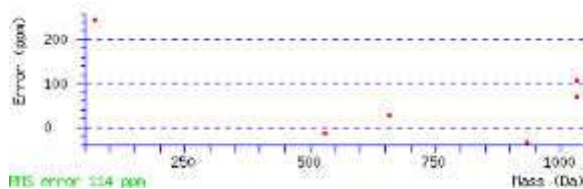

NCBI **BLAST** search of [AIGIDKFGASAPAGK](#)

(Parameters: blastp, nr protein database, expect=20000, no filter, PAM30)

Other BLAST [web gateways](#)

#### All matches to this query

| Score | Mr(calc)  | Delta  | Sequence                        |
|-------|-----------|--------|---------------------------------|
| 11.3  | 1401.7252 | 0.0451 | <a href="#">KGWSASIDSVGPAK</a>  |
| 7.2   | 1401.7326 | 0.0377 | <a href="#">MEIPGVTEGVPAGK</a>  |
| 6.9   | 1401.7034 | 0.0669 | <a href="#">ILDRAMEVENGR</a>    |
| 6.9   | 1401.6671 | 0.1033 | <a href="#">GCGPGANTISIAER</a>  |
| 6.2   | 1401.6848 | 0.0855 | <a href="#">AQGDPSSTAAATVAR</a> |
| 5.9   | 1401.6671 | 0.1033 | <a href="#">GCGPASASSVGLSPR</a> |
| 5.8   | 1401.6484 | 0.1219 | <a href="#">GEANVGSGDSSPAVR</a> |
| 5.2   | 1401.7616 | 0.0087 | <a href="#">TPOASAFAVELIR</a>   |
| 5.2   | 1401.6381 | 0.1322 | <a href="#">LHGALCDDMGLGK</a>   |
| 5.1   | 1401.7616 | 0.0087 | <a href="#">AIGIDKFGASAPAGK</a> |

Mascot: <http://www.matrixscience.com/>


**Mascot Search Results**
**Peptide View**      **Spot no 113**
**MS/MS Fragmentation of MFGDFQKDTPEER**

 Found in **gi28190676** in **NCBI**nr, putative transketolase [Oryza sativa Japonica Group]

Match to Query 77: 1598.731824 from(1599.739100,1+) intensity(0.0000) index(26)

Title: Label: D1, Spot\_Id: 219677, Peak\_List\_Id: 224863, MSMS Job\_Run\_Id: 21756, Comment:

Data file C:\Documents and Settings\Administrator\Desktop\farah BHU\spot set plate\Farah-Garima 11May 2013\ppw\_D1\_136842020900.txt

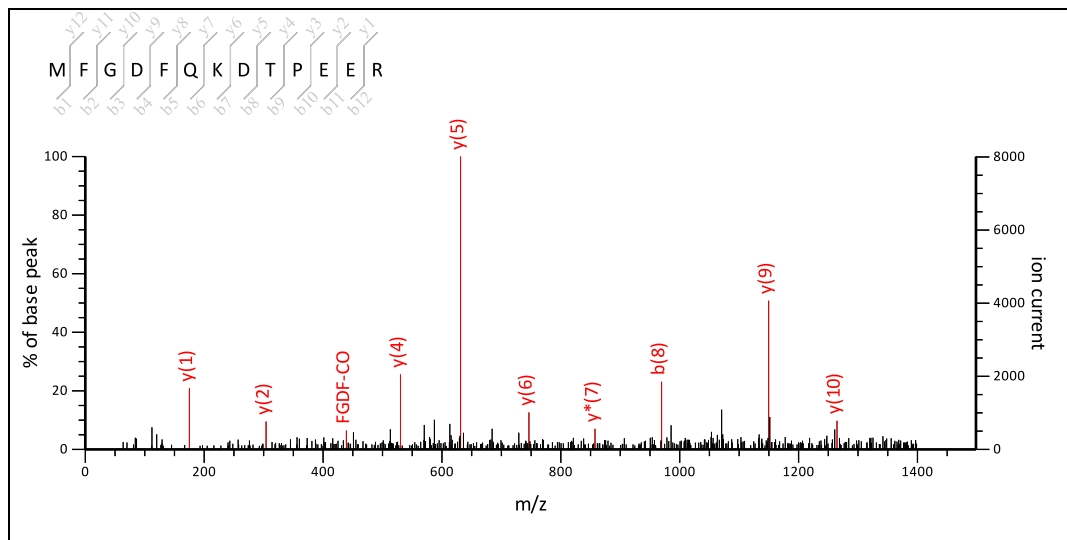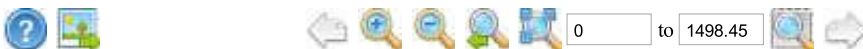
 Label all possible matches     Label matches used for scoring 

Monoisotopic mass of neutral peptide Mr(calc): 1598.7035

Fixed modifications: Carbamidomethyl (C) (apply to specified residues or termini only)

Ions Score: 51    Expect: 0.012

 Matches : 11/210 fragment ions using 14 most intense peaks ([help](#))

| #  | Immon.   | a         | a*        | a <sup>0</sup> | b         | b*        | b <sup>0</sup> | d         | d'        | Seq. | v         | w         | w'       | y         | y*        |
|----|----------|-----------|-----------|----------------|-----------|-----------|----------------|-----------|-----------|------|-----------|-----------|----------|-----------|-----------|
| 1  | 104.0528 | 104.0528  |           |                | 132.0478  |           |                | 44.0495   |           | M    |           |           |          |           |           |
| 2  | 120.0808 | 251.1213  |           |                | 279.1162  |           |                |           |           | F    | 1376.6077 |           |          | 1468.6703 | 1451.6438 |
| 3  | 30.0338  | 308.1427  |           |                | 336.1376  |           |                |           |           | G    |           |           |          | 1321.6019 | 1304.5753 |
| 4  | 88.0393  | 423.1697  |           | 405.1591       | 451.1646  |           | 433.1540       | 379.1798  |           | D    | 1204.5593 | 1203.5640 |          | 1264.5804 | 1247.5539 |
| 5  | 120.0808 | 570.2381  |           | 552.2275       | 598.2330  |           | 580.2224       |           |           | F    | 1057.4909 |           |          | 1149.5535 | 1132.5269 |
| 6  | 101.0709 | 698.2967  | 681.2701  | 680.2861       | 726.2916  | 709.2650  | 708.2810       | 641.2752  |           | Q    | 929.4323  | 928.4371  |          | 1002.4851 | 985.4585  |
| 7  | 101.1073 | 826.3916  | 809.3651  | 808.3811       | 854.3865  | 837.3600  | 836.3760       | 769.3338  |           | K    | 801.3373  | 800.3421  |          | 874.4265  | 857.3999  |
| 8  | 88.0393  | 941.4186  | 924.3920  | 923.4080       | 969.4135  | 952.3869  | 951.4029       | 897.4287  |           | D    | 686.3104  | 685.3151  |          | 746.3315  | 729.3050  |
| 9  | 74.0600  | 1042.4662 | 1025.4397 | 1024.4557      | 1070.4612 | 1053.4346 | 1052.4506      | 1026.4713 | 1028.4506 | T    | 585.2627  | 598.2831  | 600.2624 | 631.3046  | 614.2780  |
| 10 | 70.0651  | 1139.5190 | 1122.4925 | 1121.5084      | 1167.5139 | 1150.4874 | 1149.5034      | 1113.5034 |           | P    | 488.2100  | 487.2147  |          | 530.2569  | 513.2304  |
| 11 | 102.0550 | 1268.5616 | 1251.5351 | 1250.5510      | 1296.5565 | 1279.5300 | 1278.5460      | 1210.5561 |           | E    | 359.1674  | 358.1721  |          | 433.2041  | 416.1776  |
| 12 | 102.0550 | 1397.6042 | 1380.5776 | 1379.5936      | 1425.5991 | 1408.5726 | 1407.5885      | 1339.5987 |           | E    | 230.1248  | 229.1295  |          | 304.1615  | 287.1350  |
| 13 | 129.1135 |           |           |                |           |           |                |           |           | R    | 74.0237   | 73.0284   |          | 175.1190  | 158.0924  |

| Seq    | ya       | yb       | Seq    | ya       | yb       | Seq    | ya       | yb       |
|--------|----------|----------|--------|----------|----------|--------|----------|----------|
| FG     | 177.1022 | 205.0972 | FGD    | 292.1292 | 320.1241 | FGDF   | 439.1976 | 467.1925 |
| FGDFQ  | 567.2562 | 595.2511 | FGDFQK | 695.3511 | 723.3461 | GD     | 145.0608 | 173.0557 |
| GDF    | 292.1292 | 320.1241 | GDFQ   | 420.1878 | 448.1827 | GDFQK  | 548.2827 | 576.2776 |
| GDFQKD | 663.3097 | 691.3046 | DF     | 235.1077 | 263.1026 | DFQ    | 363.1663 | 391.1612 |
| DFQK   | 491.2613 | 519.2562 | DFQKD  | 606.2882 | 634.2831 | FQ     | 248.1394 | 276.1343 |
| FQK    | 376.2343 | 404.2292 | FQKD   | 491.2613 | 519.2562 | FQKDT  | 592.3089 | 620.3039 |
| FQKDT  | 689.3617 | 717.3566 | QK     | 229.1659 | 257.1608 | QKD    | 344.1928 | 372.1878 |
| QKDT   | 445.2405 | 473.2354 | QKDT   | 542.2933 | 570.2882 | QKDTPE | 671.3359 | 699.3308 |

|              |          |          |               |          |          |              |          |          |
|--------------|----------|----------|---------------|----------|----------|--------------|----------|----------|
| <b>KD</b>    | 216.1343 | 244.1292 | <b>KDT</b>    | 317.1819 | 345.1769 | <b>KDTP</b>  | 414.2347 | 442.2296 |
| <b>KDTPE</b> | 543.2773 | 571.2722 | <b>KDTPEE</b> | 672.3199 | 700.3148 | <b>DT</b>    | 189.0870 | 217.0819 |
| <b>DTP</b>   | 286.1397 | 314.1347 | <b>DTPE</b>   | 415.1823 | 443.1773 | <b>DTPEE</b> | 544.2249 | 572.2198 |
| <b>TP</b>    | 171.1128 | 199.1077 | <b>TPE</b>    | 300.1554 | 328.1503 | <b>TPEE</b>  | 429.1980 | 457.1929 |
| <b>PE</b>    | 199.1077 | 227.1026 | <b>PEE</b>    | 328.1503 | 356.1452 | <b>EE</b>    | 231.0975 | 259.0925 |

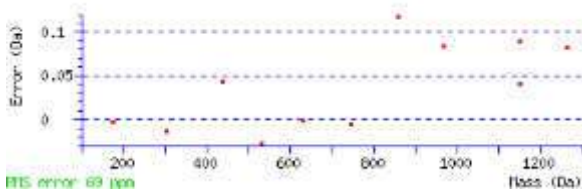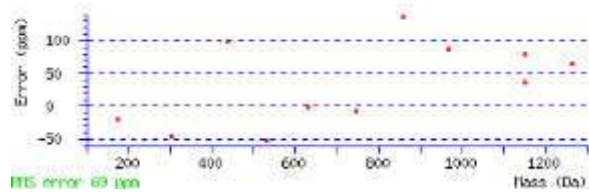

NCBI **BLAST** search of [MFGDFOKDTPEER](#)

(Parameters: blastp, nr protein database, expect=20000, no filter, PAM30)

Other BLAST [web gateways](#)

#### All matches to this query

| Score | Mr(calc)  | Delta   | Sequence                         |
|-------|-----------|---------|----------------------------------|
| 51.5  | 1598.7035 | 0.0283  | <a href="#">MFGDFOKDTPEER</a>    |
| 14.8  | 1598.8879 | -0.1561 | <a href="#">EGKTLVILDDVLER</a>   |
| 13.4  | 1598.7134 | 0.0184  | <a href="#">LYSMEDVDEVVER</a>    |
| 13.3  | 1598.7974 | -0.0656 | <a href="#">MSIDSPDPVLLER</a>    |
| 12.8  | 1598.7722 | -0.0404 | <a href="#">GAMVAHVSEDGEILR</a>  |
| 12.3  | 1598.8165 | -0.0847 | <a href="#">SODKAOHAFGLLER</a>   |
| 11.6  | 1598.7909 | -0.0591 | <a href="#">MKPOGGSVAPICNPK</a>  |
| 11.5  | 1598.8053 | -0.0734 | <a href="#">LSGSLLFHNTEPER</a>   |
| 10.5  | 1598.7954 | -0.0636 | <a href="#">VFPWNNAPSGGGAIGR</a> |
| 9.5   | 1598.6990 | 0.0328  | <a href="#">AMELIDEMEVTMR</a>    |

Mascot: <http://www.matrixscience.com/>

**MATRIX SCIENCE Mascot Search Results**

**Peptide View Spot no 113**

MS/MS Fragmentation of **MFGDFQKDTPEER**

Found in **gi28190676** in **NCBIInr**, putative transketolase [Oryza sativa Japonica Group]

Match to Query 79: 1614.710724 from(1615.718000,1+) intensity(0.0000) index(27)

Title: Label: D1, Spot\_Id: 219677, Peak\_List\_Id: 224862, MSMS Job\_Run\_Id: 21756, Comment:

Data file C:\Documents and Settings\Administrator\Desktop\farah BHU\spot set plate\Farah-Garima 11May 2013\ppw\_D1\_136842020900.txt

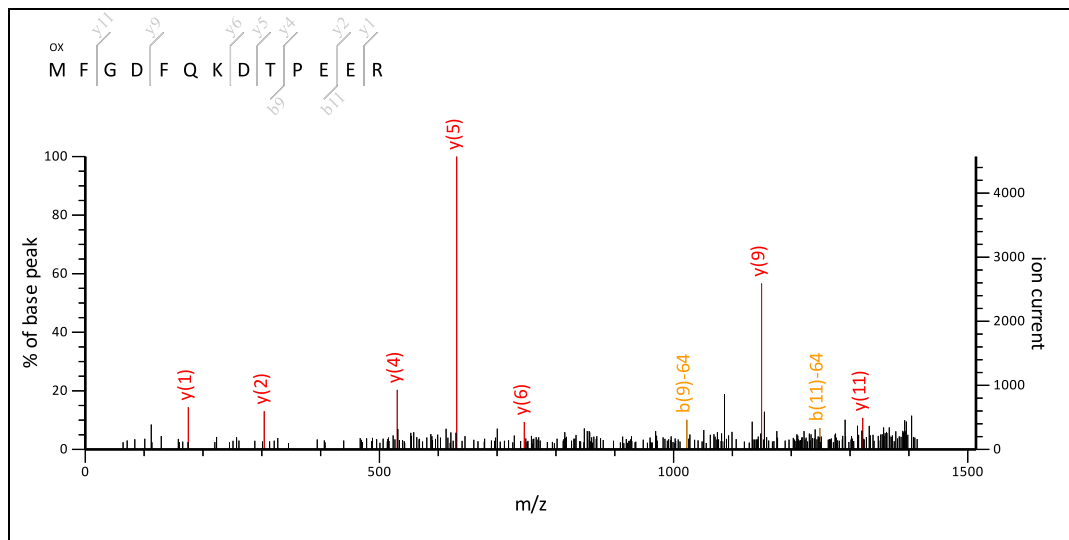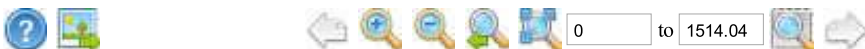

Label all possible matches  Label matches used for scoring

Monoisotopic mass of neutral peptide Mr(calc): 1614.6984

Fixed modifications: Carbamidomethyl (C) (apply to specified residues or termini only)

Variable modifications:

M1 : Oxidation (M), with neutral losses 63.9983 (shown in table), 0.0000

Ions Score: 47 Expect: 0.028

Matches : 9/276 fragment ions using 14 most intense peaks ([help](#))

| #  | Immon.   | a         | a*        | a <sup>0</sup> | b         | b*        | b <sup>0</sup> | d         | d'       | Seq. | v         | w         | w'       | y         | y*        |
|----|----------|-----------|-----------|----------------|-----------|-----------|----------------|-----------|----------|------|-----------|-----------|----------|-----------|-----------|
| 1  | 56.0495  | 56.0495   |           |                | 84.0444   |           |                | 44.0495   |          | M    |           |           |          |           |           |
| 2  | 120.0808 | 203.1179  |           |                | 231.1128  |           |                |           |          | F    | 1376.6077 |           |          | 1468.6703 | 1451.6438 |
| 3  | 30.0338  | 260.1394  |           |                | 288.1343  |           |                |           |          | G    |           |           |          | 1321.6019 | 1304.5753 |
| 4  | 88.0393  | 375.1663  |           | 357.1557       | 403.1612  |           | 385.1506       | 331.1765  |          | D    | 1204.5593 | 1203.5640 |          | 1264.5804 | 1247.5539 |
| 5  | 120.0808 | 522.2347  |           | 504.2241       | 550.2296  |           | 532.2191       |           |          | F    | 1057.4909 |           |          | 1149.5535 | 1132.5269 |
| 6  | 101.0709 | 650.2933  | 633.2667  | 632.2827       | 678.2882  | 661.2617  | 660.2776       | 593.2718  |          | Q    | 929.4323  | 928.4371  |          | 1002.4851 | 985.4585  |
| 7  | 101.1073 | 778.3883  | 761.3617  | 760.3777       | 806.3832  | 789.3566  | 788.3726       | 721.3304  |          | K    | 801.3373  | 800.3421  |          | 874.4265  | 857.3999  |
| 8  | 88.0393  | 893.4152  | 876.3886  | 875.4046       | 921.4101  | 904.3836  | 903.3995       | 849.4254  |          | D    | 686.3104  | 685.3151  |          | 746.3315  | 729.3050  |
| 9  | 74.0600  | 994.4629  | 977.4363  | 976.4523       | 1022.4578 | 1005.4312 | 1004.4472      | 978.4680  | 980.4472 | T    | 585.2627  | 598.2831  | 600.2624 | 631.3046  | 614.2780  |
| 10 | 70.0651  | 1091.5156 | 1074.4891 | 1073.5051      | 1119.5106 | 1102.4840 | 1101.5000      | 1065.5000 |          | P    | 488.2100  | 487.2147  |          | 530.2569  | 513.2304  |
| 11 | 102.0550 | 1220.5582 | 1203.5317 | 1202.5477      | 1248.5531 | 1231.5266 | 1230.5426      | 1162.5528 |          | E    | 359.1674  | 358.1721  |          | 433.2041  | 416.1776  |
| 12 | 102.0550 | 1349.6008 | 1332.5743 | 1331.5903      | 1377.5957 | 1360.5692 | 1359.5852      | 1291.5953 |          | E    | 230.1248  | 229.1295  |          | 304.1615  | 287.1350  |
| 13 | 129.1135 |           |           |                |           |           |                |           |          | R    | 74.0237   | 73.0284   |          | 175.1190  | 158.0924  |

| Seq    | ya       | yb       | Seq    | ya       | yb       | Seq   | ya       | yb       |
|--------|----------|----------|--------|----------|----------|-------|----------|----------|
| FG     | 177.1022 | 205.0972 | FGD    | 292.1292 | 320.1241 | FGDF  | 439.1976 | 467.1925 |
| FGDFQ  | 567.2562 | 595.2511 | FGDFQK | 695.3511 | 723.3461 | GD    | 145.0608 | 173.0557 |
| GDF    | 292.1292 | 320.1241 | GDFQ   | 420.1878 | 448.1827 | GDFQK | 548.2827 | 576.2776 |
| GDFQKD | 663.3097 | 691.3046 | DF     | 235.1077 | 263.1026 | DFQ   | 363.1663 | 391.1612 |
| DFQK   | 491.2613 | 519.2562 | DFQKD  | 606.2882 | 634.2831 | FQ    | 248.1394 | 276.1343 |

|                        |          |          |                        |          |          |                        |          |          |
|------------------------|----------|----------|------------------------|----------|----------|------------------------|----------|----------|
| <a href="#">FQK</a>    | 376.2343 | 404.2292 | <a href="#">FQKD</a>   | 491.2613 | 519.2562 | <a href="#">FQKDT</a>  | 592.3089 | 620.3039 |
| <a href="#">FQKDTP</a> | 689.3617 | 717.3566 | <a href="#">QK</a>     | 229.1659 | 257.1608 | <a href="#">QKD</a>    | 344.1928 | 372.1878 |
| <a href="#">QKDT</a>   | 445.2405 | 473.2354 | <a href="#">QKDTP</a>  | 542.2933 | 570.2882 | <a href="#">QKDTPE</a> | 671.3359 | 699.3308 |
| <a href="#">KD</a>     | 216.1343 | 244.1292 | <a href="#">KDT</a>    | 317.1819 | 345.1769 | <a href="#">KDTP</a>   | 414.2347 | 442.2296 |
| <a href="#">KDTPE</a>  | 543.2773 | 571.2722 | <a href="#">KDTPEE</a> | 672.3199 | 700.3148 | <a href="#">DT</a>     | 189.0870 | 217.0819 |
| <a href="#">DTP</a>    | 286.1397 | 314.1347 | <a href="#">DTPE</a>   | 415.1823 | 443.1773 | <a href="#">DTPEE</a>  | 544.2249 | 572.2198 |
| <a href="#">TP</a>     | 171.1128 | 199.1077 | <a href="#">TPE</a>    | 300.1554 | 328.1503 | <a href="#">TPEE</a>   | 429.1980 | 457.1929 |
| <a href="#">PE</a>     | 199.1077 | 227.1026 | <a href="#">PEE</a>    | 328.1503 | 356.1452 | <a href="#">EE</a>     | 231.0975 | 259.0925 |

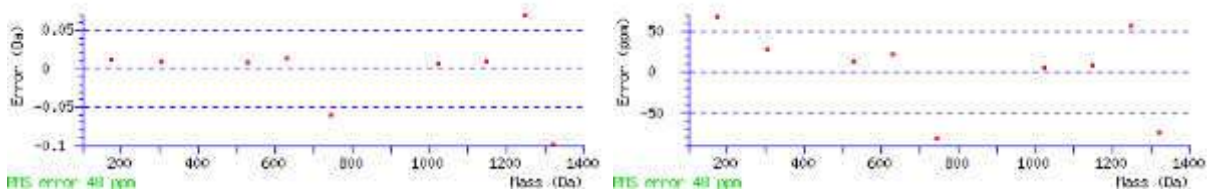

NCBI BLAST search of [MFGDFOKDTPEER](#)

(Parameters: blastp, nr protein database, expect=20000, no filter, PAM30)

Other BLAST [web gateways](#)

#### All matches to this query

| Score | Mr(calc)  | Delta   | Sequence                       |
|-------|-----------|---------|--------------------------------|
| 47.2  | 1614.6984 | 0.0123  | <a href="#">MFGDFOKDTPEER</a>  |
| 40.6  | 1614.6984 | 0.0123  | <a href="#">MYGDFOKDTPEER</a>  |
| 25.2  | 1614.7242 | -0.0135 | <a href="#">MMRANFTTAQGAER</a> |
| 12.0  | 1614.8076 | -0.0968 | <a href="#">FGSEGSKIFMVLER</a> |
| 10.7  | 1614.7204 | -0.0097 | <a href="#">MFOKMEELCVER</a>   |
| 10.4  | 1614.6885 | 0.0222  | <a href="#">QVLAYALDXTXDER</a> |
| 10.3  | 1614.7083 | 0.0024  | <a href="#">ESSEPESMFTNLK</a>  |
| 10.3  | 1614.7712 | -0.0605 | <a href="#">CFOEGLSYTIER</a>   |
| 10.2  | 1614.7599 | -0.0492 | <a href="#">SFFVEMDETIER</a>   |
| 10.2  | 1614.6879 | 0.0229  | <a href="#">MMAQEHASSAVER</a>  |

Mascot: <http://www.matrixscience.com/>



**MATRIX SCIENCE Mascot Search Results**

**Peptide View Spot no 113**

MS/MS Fragmentation of **IYQEYGITAVIAK**

Found in **gi28190676** in **NCBI**nr, putative transketolase [Oryza sativa Japonica Group]

Match to Query 88: 1882.988524 from(1883.995800,1+) intensity(0.0000) index(30)

Title: Label: D1, Spot\_Id: 219677, Peak\_List\_Id: 224891, MSMS Job\_Run\_Id: 21756, Comment:

Data file C:\Documents and Settings\Administrator\Desktop\farah BHU\spot set plate\Farah-Garima 11May 2013\ppw\_D1\_136842020900.txt

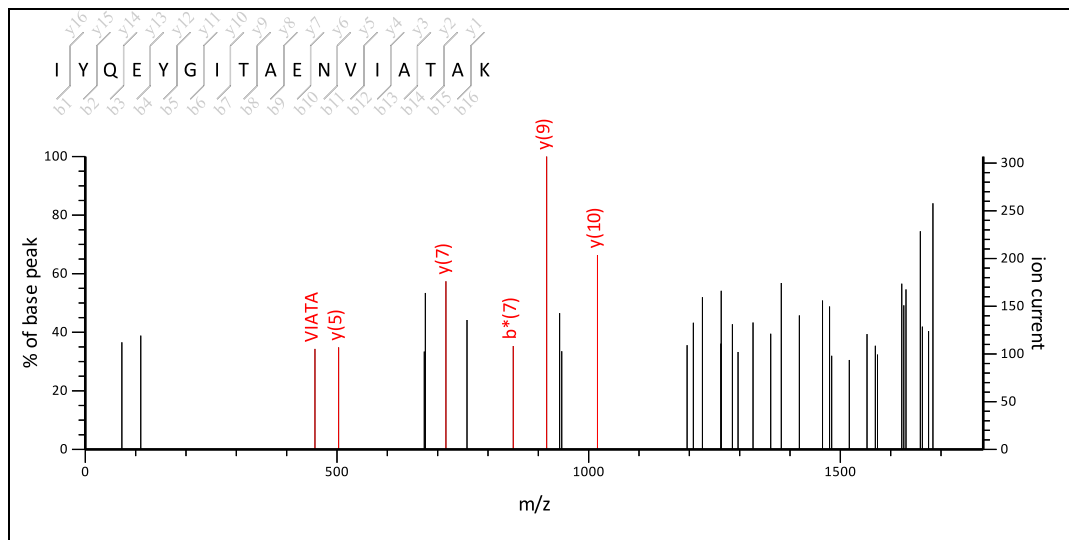

Navigation icons: Home, Back, Forward, Search, Print, Refresh. Search range: 0 to 1783.92.

Label all possible matches  Label matches used for scoring

Monoisotopic mass of neutral peptide Mr(calc): 1882.9676

Fixed modifications: Carbamidomethyl (C) (apply to specified residues or termini only)

Ions Score: 10 Expect: 1.5e+02

Matches : 7/318 fragment ions using 13 most intense peaks (help)

| #  | Immon.   | a         | a*        | a <sup>0</sup> | b         | b*        | b <sup>0</sup> | d         | d'        | Seq. | v         | w         | w'        | y         | y*        |
|----|----------|-----------|-----------|----------------|-----------|-----------|----------------|-----------|-----------|------|-----------|-----------|-----------|-----------|-----------|
| 1  | 86.0964  | 86.0964   |           |                | 114.0913  |           |                | 44.0495   |           | I    |           |           |           |           |           |
| 2  | 136.0757 | 249.1598  |           |                | 277.1547  |           |                |           |           | Y    | 1662.8333 |           |           | 1770.8909 | 1753.8643 |
| 3  | 101.0709 | 377.2183  | 360.1918  |                | 405.2132  | 388.1867  |                | 320.1969  |           | Q    | 1534.7748 | 1533.7795 |           | 1607.8275 | 1590.8010 |
| 4  | 102.0550 | 506.2609  | 489.2344  | 488.2504       | 534.2558  | 517.2293  | 516.2453       | 448.2554  |           | E    | 1405.7322 | 1404.7369 |           | 1479.7690 | 1462.7424 |
| 5  | 136.0757 | 669.3243  | 652.2977  | 651.3137       | 697.3192  | 680.2926  | 679.3086       |           |           | Y    | 1242.6688 |           |           | 1350.7264 | 1333.6998 |
| 6  | 30.0338  | 726.3457  | 709.3192  | 708.3352       | 754.3406  | 737.3141  | 736.3301       |           |           | G    |           |           |           | 1187.6630 | 1170.6365 |
| 7  | 86.0964  | 839.4298  | 822.4032  | 821.4192       | 867.4247  | 850.3981  | 849.4141       | 811.3985  | 825.4141  | I    | 1072.5633 | 1085.5837 | 1099.5994 | 1130.6416 | 1113.6150 |
| 8  | 74.0600  | 940.4775  | 923.4509  | 922.4669       | 968.4724  | 951.4458  | 950.4618       | 924.4825  | 926.4618  | T    | 971.5156  | 984.5360  | 986.5153  | 1017.5575 | 1000.5310 |
| 9  | 44.0495  | 1011.5146 | 994.4880  | 993.5040       | 1039.5095 | 1022.4829 | 1021.4989      |           |           | A    | 900.4785  |           |           | 916.5098  | 899.4833  |
| 10 | 102.0550 | 1140.5572 | 1123.5306 | 1122.5466      | 1168.5521 | 1151.5255 | 1150.5415      | 1082.5517 |           | E    | 771.4359  | 770.4407  |           | 845.4727  | 828.4462  |
| 11 | 87.0553  | 1254.6001 | 1237.5735 | 1236.5895      | 1282.5950 | 1265.5685 | 1264.5844      | 1211.5943 |           | N    | 657.3930  | 656.3978  |           | 716.4301  | 699.4036  |
| 12 | 72.0808  | 1353.6685 | 1336.6420 | 1335.6579      | 1381.6634 | 1364.6369 | 1363.6529      | 1339.6529 |           | V    | 558.3246  | 571.3450  |           | 602.3872  | 585.3606  |
| 13 | 86.0964  | 1466.7526 | 1449.7260 | 1448.7420      | 1494.7475 | 1477.7209 | 1476.7369      | 1438.7213 | 1452.7369 | I    | 445.2405  | 458.2609  | 472.2766  | 503.3188  | 486.2922  |
| 14 | 44.0495  | 1537.7897 | 1520.7631 | 1519.7791      | 1565.7846 | 1548.7581 | 1547.7740      |           |           | A    | 374.2034  |           |           | 390.2347  | 373.2082  |
| 15 | 74.0600  | 1638.8374 | 1621.8108 | 1620.8268      | 1666.8323 | 1649.8057 | 1648.8217      | 1622.8425 | 1624.8217 | T    | 273.1557  | 286.1761  | 288.1554  | 319.1976  | 302.1710  |
| 16 | 44.0495  | 1709.8745 | 1692.8479 | 1691.8639      | 1737.8694 | 1720.8428 | 1719.8588      |           |           | A    | 202.1186  |           |           | 218.1499  | 201.1234  |
| 17 | 101.1073 |           |           |                |           |           |                |           |           | K    | 74.0237   | 73.0284   |           | 147.1128  | 130.0863  |

| Seq  | ya       | yb       | Seq   | ya       | yb       | Seq    | ya       | yb       |
|------|----------|----------|-------|----------|----------|--------|----------|----------|
| YQ   | 264.1343 | 292.1292 | YQE   | 393.1769 | 421.1718 | YQEY   | 556.2402 | 584.2351 |
| YQEY | 613.2617 | 641.2566 | QE    | 230.1135 | 258.1084 | QEY    | 393.1769 | 421.1718 |
| QEY  | 450.1983 | 478.1932 | QEYGI | 563.2824 | 591.2773 | QEYGIT | 664.3301 | 692.3250 |
| EY   | 265.1183 | 293.1132 | EYGI  | 322.1397 | 350.1347 | EYGI   | 435.2238 | 463.2187 |

|                         |          |          |                        |          |          |                         |          |          |
|-------------------------|----------|----------|------------------------|----------|----------|-------------------------|----------|----------|
| <a href="#">EYGIT</a>   | 536.2715 | 564.2664 | <a href="#">EYGITA</a> | 607.3086 | 635.3035 | <a href="#">YG</a>      | 193.0972 | 221.0921 |
| <a href="#">YGI</a>     | 306.1812 | 334.1761 | <a href="#">YGIT</a>   | 407.2289 | 435.2238 | <a href="#">YGITA</a>   | 478.2660 | 506.2609 |
| <a href="#">YGITAE</a>  | 607.3086 | 635.3035 | <a href="#">GI</a>     | 143.1179 | 171.1128 | <a href="#">GIT</a>     | 244.1656 | 272.1605 |
| <a href="#">GITA</a>    | 315.2027 | 343.1976 | <a href="#">GITAE</a>  | 444.2453 | 472.2402 | <a href="#">GITAEN</a>  | 558.2882 | 586.2831 |
| <a href="#">GITAENV</a> | 657.3566 | 685.3515 | <a href="#">IT</a>     | 187.1441 | 215.1390 | <a href="#">ITA</a>     | 258.1812 | 286.1761 |
| <a href="#">ITAE</a>    | 387.2238 | 415.2187 | <a href="#">ITAEN</a>  | 501.2667 | 529.2617 | <a href="#">ITAENV</a>  | 600.3352 | 628.3301 |
| <a href="#">TA</a>      | 145.0972 | 173.0921 | <a href="#">TAE</a>    | 274.1397 | 302.1347 | <a href="#">TAEN</a>    | 388.1827 | 416.1776 |
| <a href="#">TAENV</a>   | 487.2511 | 515.2460 | <a href="#">TAENVI</a> | 600.3352 | 628.3301 | <a href="#">TAENVIA</a> | 671.3723 | 699.3672 |
| <a href="#">AE</a>      | 173.0921 | 201.0870 | <a href="#">AEN</a>    | 287.1350 | 315.1299 | <a href="#">AENV</a>    | 386.2034 | 414.1983 |
| <a href="#">AENVI</a>   | 499.2875 | 527.2824 | <a href="#">AENVIA</a> | 570.3246 | 598.3195 | <a href="#">AENVIAT</a> | 671.3723 | 699.3672 |
| <a href="#">EN</a>      | 216.0979 | 244.0928 | <a href="#">ENV</a>    | 315.1663 | 343.1612 | <a href="#">ENVI</a>    | 428.2504 | 456.2453 |
| <a href="#">ENVIA</a>   | 499.2875 | 527.2824 | <a href="#">ENVIAT</a> | 600.3352 | 628.3301 | <a href="#">ENVIATA</a> | 671.3723 | 699.3672 |
| <a href="#">NV</a>      | 186.1237 | 214.1186 | <a href="#">NVI</a>    | 299.2078 | 327.2027 | <a href="#">NVIA</a>    | 370.2449 | 398.2398 |
| <a href="#">NVIAT</a>   | 471.2926 | 499.2875 | <a href="#">NVIATA</a> | 542.3297 | 570.3246 | <a href="#">VI</a>      | 185.1648 | 213.1598 |
| <a href="#">VIA</a>     | 256.2020 | 284.1969 | <a href="#">VIAT</a>   | 357.2496 | 385.2445 | <a href="#">VIATA</a>   | 428.2867 | 456.2817 |
| <a href="#">IA</a>      | 157.1335 | 185.1285 | <a href="#">IAT</a>    | 258.1812 | 286.1761 | <a href="#">IATA</a>    | 329.2183 | 357.2132 |
| <a href="#">AT</a>      | 145.0972 | 173.0921 | <a href="#">ATA</a>    | 216.1343 | 244.1292 | <a href="#">TA</a>      | 145.0972 | 173.0921 |

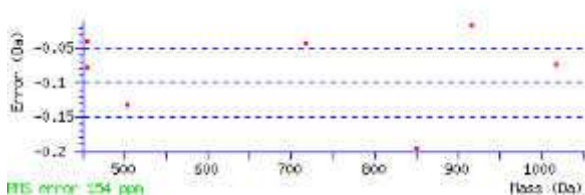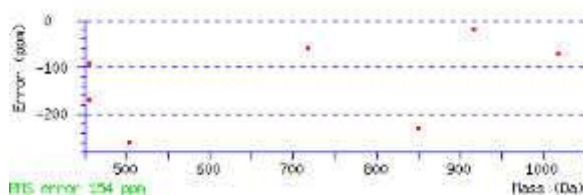

NCBI BLAST search of [IYOEYGITAENVIATAK](#)

(Parameters: blastp, nr protein database, expect=20000, no filter, PAM30)

Other BLAST [web gateways](#)

#### All matches to this query

| Score | Mr(calc)  | Delta   | Sequence                            |
|-------|-----------|---------|-------------------------------------|
| 10.4  | 1882.9676 | 0.0209  | <a href="#">IYOEYGITAENVIATAK</a>   |
| 10.4  | 1882.8730 | 0.1155  | <a href="#">QIKNMIAETEODYER</a>     |
| 6.8   | 1883.0265 | -0.0379 | <a href="#">ISPTASGAALVSLKFEHR</a>  |
| 2.2   | 1882.9135 | 0.0750  | <a href="#">TVSVPM SLETYSWDLR</a>   |
| 1.7   | 1882.8731 | 0.1154  | <a href="#">NMAHGTSNSTIYTELLK</a>   |
| 1.6   | 1883.0000 | -0.0115 | <a href="#">QGTLDPALATAEAGQTVIK</a> |
| 1.1   | 1883.0364 | -0.0479 | <a href="#">SLDSVVPVNGAALSEKLGK</a> |
| 0.7   | 1882.9346 | 0.0539  | <a href="#">SILYQTM DISLVENNK</a>   |
| 0.1   | 1882.9724 | 0.0162  | <a href="#">LSAVCGGASFFERLLTR</a>   |

Mascot: <http://www.matrixscience.com/>



# Mascot Search Results

## Peptide View **Spot no 114**

MS/MS Fragmentation of **VVDLLAPYRR**

Found in **gi11583** in **NCBI**nr, ATPase, beta subunit [Hordeum vulgare]

Match to Query 127: 1200.726724 from(1201.734000,1+) intensity(0.0000) index(14)

Title: Label: I1, Spot\_Id: 219682, Peak\_List\_Id: 225014, MSMS Job\_Run\_Id: 21761, Comment:

Data file C:\Documents and Settings\Administrator\Desktop\farah BHU\spot set plate\Farah-Garima 11May 2013\ppw\_I1\_136842037600.txt

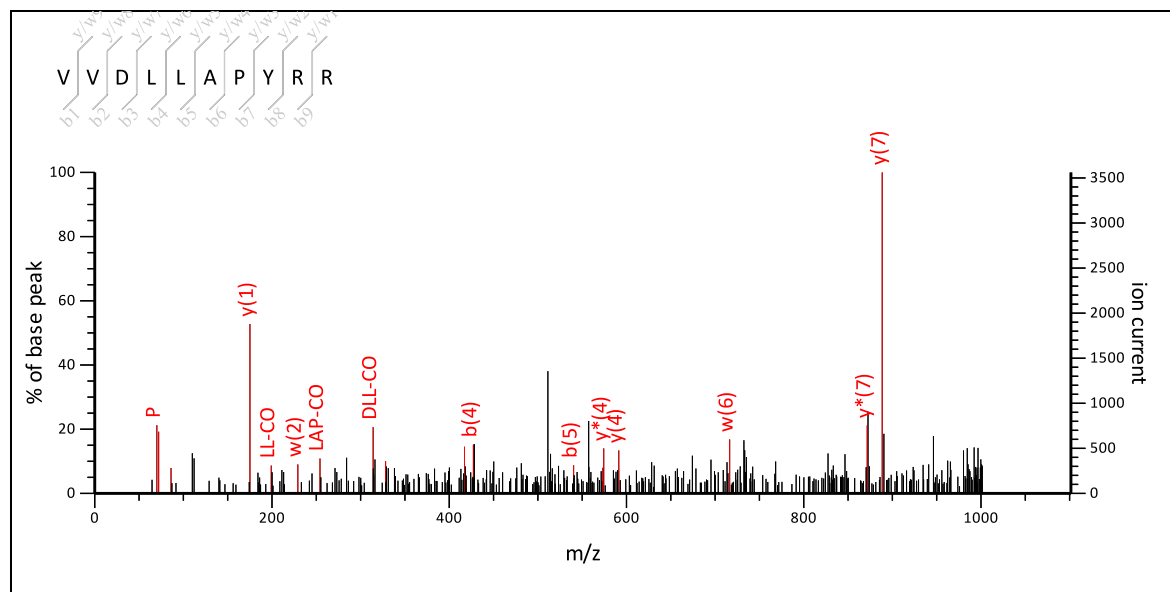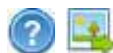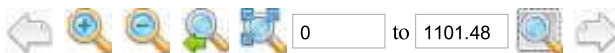

Label all possible matches  Label matches used for scoring

Monoisotopic mass of neutral peptide Mr(calc): 1200.6979

Fixed modifications: Carbamidomethyl (C) (apply to specified residues or termini only)

Ions Score: 15 Expect: 50

Matches : 27/136 fragment ions using 50 most intense peaks ([help](#))

| #  | Immon.   | a        | a*       | a <sup>0</sup> | b         | b*        | b <sup>0</sup> | d        | Seq. | v         | w         | y         | y*        | y <sup>0</sup> | #  |
|----|----------|----------|----------|----------------|-----------|-----------|----------------|----------|------|-----------|-----------|-----------|-----------|----------------|----|
| 1  | 72.0808  | 72.0808  |          |                | 100.0757  |           |                | 44.0495  | V    |           |           |           |           |                | 10 |
| 2  | 72.0808  | 171.1492 |          |                | 199.1441  |           |                | 157.1335 | V    | 1058.5742 | 1071.5946 | 1102.6368 | 1085.6102 | 1084.6262      | 9  |
| 3  | 88.0393  | 286.1761 |          | 268.1656       | 314.1710  |           | 296.1605       | 242.1863 | D    | 943.5472  | 942.5520  | 1003.5683 | 986.5418  | 985.5578       | 8  |
| 4  | 86.0964  | 399.2602 |          | 381.2496       | 427.2551  |           | 409.2445       | 357.2132 | L    | 830.4631  | 829.4679  | 888.5414  | 871.5148  |                | 7  |
| 5  | 86.0964  | 512.3443 |          | 494.3337       | 540.3392  |           | 522.3286       | 470.2973 | L    | 717.3791  | 716.3838  | 775.4573  | 758.4308  |                | 6  |
| 6  | 44.0495  | 583.3814 |          | 565.3708       | 611.3763  |           | 593.3657       |          | A    | 646.3420  |           | 662.3733  | 645.3467  |                | 5  |
| 7  | 70.0651  | 680.4341 |          | 662.4236       | 708.4291  |           | 690.4185       | 654.4185 | P    | 549.2892  | 548.2940  | 591.3362  | 574.3096  |                | 4  |
| 8  | 136.0757 | 843.4975 |          | 825.4869       | 871.4924  |           | 853.4818       |          | Y    | 386.2259  |           | 494.2834  | 477.2568  |                | 3  |
| 9  | 129.1135 | 999.5986 | 982.5720 | 981.5880       | 1027.5935 | 1010.5669 | 1009.5829      | 914.5346 | R    | 230.1248  | 229.1295  | 331.2201  | 314.1935  |                | 2  |
| 10 | 129.1135 |          |          |                |           |           |                |          | R    | 74.0237   | 73.0284   | 175.1190  | 158.0924  |                | 1  |

| Seq    | ya       | yb       | Seq    | ya       | yb       | Seq    | ya       | yb       |
|--------|----------|----------|--------|----------|----------|--------|----------|----------|
| VD     | 187.1077 | 215.1026 | VDL    | 300.1918 | 328.1867 | VDLL   | 413.2758 | 441.2708 |
| VDLLA  | 484.3130 | 512.3079 | VDLLAP | 581.3657 | 609.3606 | DL     | 201.1234 | 229.1183 |
| DLL    | 314.2074 | 342.2023 | DLLA   | 385.2445 | 413.2395 | DLLAP  | 482.2973 | 510.2922 |
| DLLAPY | 645.3606 | 673.3556 | LL     | 199.1805 | 227.1754 | LLA    | 270.2176 | 298.2125 |
| LLAP   | 367.2704 | 395.2653 | LLAPY  | 530.3337 | 558.3286 | LLAPYR | 686.4348 | 714.4297 |
| LA     | 157.1335 | 185.1285 | LAP    | 254.1863 | 282.1812 | LAPY   | 417.2496 | 445.2445 |

|       |          |          |    |          |          |     |          |          |
|-------|----------|----------|----|----------|----------|-----|----------|----------|
| LAPYR | 573.3507 | 601.3457 | AP | 141.1022 | 169.0972 | APY | 304.1656 | 332.1605 |
| APYR  | 460.2667 | 488.2616 | PY | 233.1285 | 261.1234 | PYR | 389.2296 | 417.2245 |
| YR    | 292.1768 | 320.1717 |    |          |          |     |          |          |

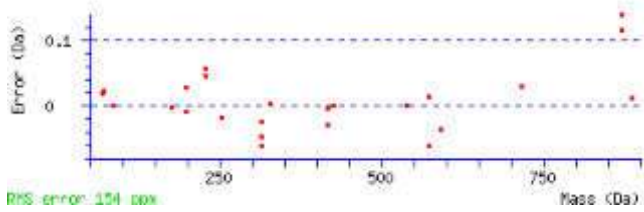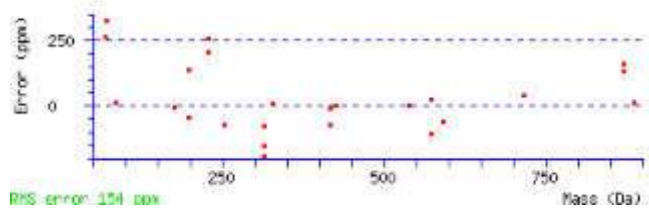

NCBI BLAST search of [VVDLLAPYRR](#)

(Parameters: blastp, nr protein database, expect=20000, no filter, PAM30)

Other BLAST [web gateways](#)

#### All matches to this query

| Score | Mr(calc)  | Delta  | Sequence                    |
|-------|-----------|--------|-----------------------------|
| 15.4  | 1200.6979 | 0.0288 | <a href="#">VVDILAPYRR</a>  |
| 15.4  | 1200.6979 | 0.0288 | <a href="#">VVDLLAPYRR</a>  |
| 15.4  | 1200.6979 | 0.0288 | <a href="#">VVDLLAPYRR</a>  |
| 15.4  | 1200.6979 | 0.0288 | <a href="#">VVDLLAPYRR</a>  |
| 15.4  | 1200.6979 | 0.0288 | <a href="#">VVDLLAPYRR</a>  |
| 15.4  | 1200.6979 | 0.0288 | <a href="#">VVDLLAPYRR</a>  |
| 15.4  | 1200.6979 | 0.0288 | <a href="#">VVDLLAPYRR</a>  |
| 15.4  | 1200.6979 | 0.0288 | <a href="#">VVDLLAPYRR</a>  |
| 15.4  | 1200.6979 | 0.0288 | <a href="#">VVDLLAPYRR</a>  |
| 15.4  | 1200.6979 | 0.0288 | <a href="#">VVDLLAPYRR</a>  |
| 15.3  | 1200.6211 | 0.1056 | <a href="#">QAVTNAQNTVR</a> |

Mascot: <http://www.matrixscience.com/>



# Mascot Search Results

## Peptide View **Spot no 114**

MS/MS Fragmentation of **AHGGVSVFGGVGER**

Found in **gj11583** in **NCBI nr**, ATPase, beta subunit [Hordeum vulgare]

Match to Query 156: 1327.698024 from(1328.705300,1+) intensity(0.0000) index(16)

Title: Label: I1, Spot\_Id: 219682, Peak\_List\_Id: 225009, MSMS Job\_Run\_Id: 21761, Comment:

Data file C:\Documents and Settings\Administrator\Desktop\farah BHU\spot set plate\Farah-Garima 11 May 2013\ppw\_I1\_136842037600.txt

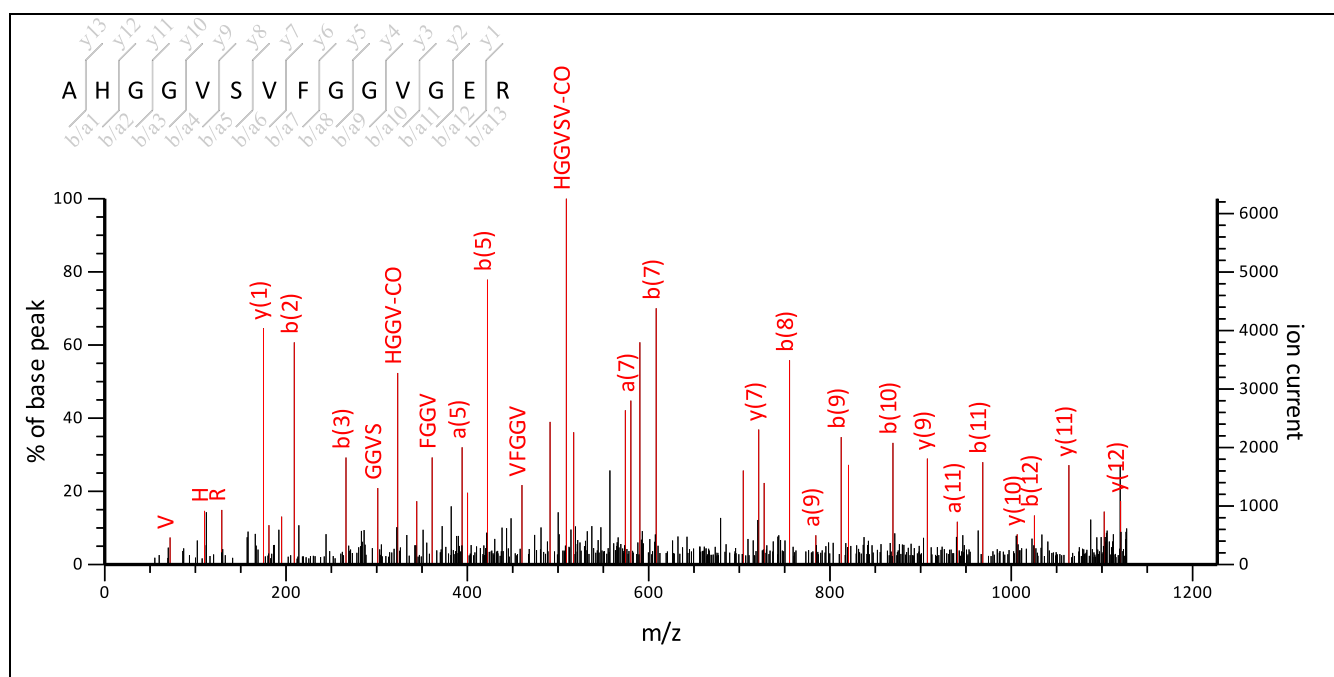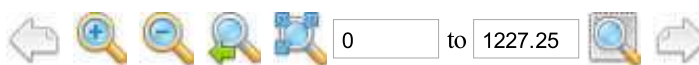

Label all possible matches  Label matches used for scoring

**Monoisotopic mass of neutral peptide Mr(calc):** 1327.6633

**Fixed modifications:** Carbamidomethyl (C) (apply to specified residues or termini only)

**Ions Score:** 124 **Expect:** 8.7e-10

**Matches :** 52/220 fragment ions using 44 most intense peaks ([help](#))

| #  | Immon.   | a        | a <sup>0</sup> | b        | b <sup>0</sup> | d        | Seq. | v         | w        | y         | y*        | y <sup>0</sup> | #  |
|----|----------|----------|----------------|----------|----------------|----------|------|-----------|----------|-----------|-----------|----------------|----|
| 1  | 44.0495  | 44.0495  |                | 72.0444  |                | 44.0495  | A    |           |          |           |           |                | 14 |
| 2  | 110.0713 | 181.1084 |                | 209.1033 |                |          | H    | 1175.5804 |          | 1257.6335 | 1240.6069 | 1239.6229      | 13 |
| 3  | 30.0338  | 238.1299 |                | 266.1248 |                |          | G    |           |          | 1120.5745 | 1103.5480 | 1102.5640      | 12 |
| 4  | 30.0338  | 295.1513 |                | 323.1462 |                |          | G    |           |          | 1063.5531 | 1046.5265 | 1045.5425      | 11 |
| 5  | 72.0808  | 394.2197 |                | 422.2146 |                | 380.2041 | V    | 962.4690  | 975.4894 | 1006.5316 | 989.5051  | 988.5211       | 10 |
| 6  | 60.0444  | 481.2518 | 463.2412       | 509.2467 | 491.2361       | 465.2568 | S    | 875.4370  | 874.4417 | 907.4632  | 890.4367  | 889.4526       | 9  |
| 7  | 72.0808  | 580.3202 | 562.3096       | 608.3151 | 590.3045       | 566.3045 | V    | 776.3686  | 789.3890 | 820.4312  | 803.4046  | 802.4206       | 8  |
| 8  | 120.0808 | 727.3886 | 709.3780       | 755.3835 | 737.3729       |          | F    | 629.3002  |          | 721.3628  | 704.3362  | 703.3522       | 7  |
| 9  | 30.0338  | 784.4100 | 766.3995       | 812.4050 | 794.3944       |          | G    |           |          | 574.2944  | 557.2678  | 556.2838       | 6  |
| 10 | 30.0338  | 841.4315 | 823.4209       | 869.4264 | 851.4159       |          | G    |           |          | 517.2729  | 500.2463  | 499.2623       | 5  |
| 11 | 72.0808  | 940.4999 | 922.4894       | 968.4948 | 950.4843       | 926.4843 | V    | 416.1888  | 429.2092 | 460.2514  | 443.2249  | 442.2409       | 4  |

|    |                 |           |           |                  |           |           |          |          |          |                 |                 |          |          |
|----|-----------------|-----------|-----------|------------------|-----------|-----------|----------|----------|----------|-----------------|-----------------|----------|----------|
| 12 | 30.0338         | 997.5214  | 979.5108  | <b>1025.5163</b> | 1007.5057 |           | <b>G</b> |          |          | <b>361.1830</b> | <b>344.1565</b> | 343.1724 | <b>3</b> |
| 13 | 102.0550        | 1126.5640 | 1108.5534 | 1154.5589        | 1136.5483 | 1068.5585 | <b>E</b> | 230.1248 | 229.1295 | 304.1615        | 287.1350        | 286.1510 | <b>2</b> |
| 14 | <b>129.1135</b> |           |           |                  |           |           | <b>R</b> | 74.0237  | 73.0284  | <b>175.1190</b> | 158.0924        |          | <b>1</b> |

| Seq             | ya              | yb              | Seq             | ya              | yb              | Seq             | ya              | yb              |
|-----------------|-----------------|-----------------|-----------------|-----------------|-----------------|-----------------|-----------------|-----------------|
| <b>HG</b>       | 167.0927        | <b>195.0877</b> | <b>HGG</b>      | 224.1142        | 252.1091        | <b>HGGV</b>     | <b>323.1826</b> | 351.1775        |
| <b>HGGVS</b>    | 410.2146        | 438.2096        | <b>HGGVSV</b>   | <b>509.2831</b> | 537.2780        | <b>HGGVSVF</b>  | 656.3515        | 684.3464        |
| <b>GG</b>       | 87.0553         | 115.0502        | <b>GGV</b>      | 186.1237        | 214.1186        | <b>GGVS</b>     | 273.1557        | <b>301.1506</b> |
| <b>GGVSV</b>    | 372.2241        | <b>400.2191</b> | <b>GGVSVF</b>   | 519.2926        | 547.2875        | <b>GGVSVFG</b>  | 576.3140        | 604.3089        |
| <b>GGVSVFVG</b> | 633.3355        | 661.3304        | <b>GV</b>       | <b>129.1022</b> | 157.0972        | <b>GVS</b>      | 216.1343        | 244.1292        |
| <b>GVS</b>      | 315.2027        | 343.1976        | <b>GVSF</b>     | 462.2711        | 490.2660        | <b>GVSFVG</b>   | 519.2926        | 547.2875        |
| <b>GVSFVG</b>   | 576.3140        | 604.3089        | <b>GVSFVGGV</b> | 675.3824        | 703.3774        | <b>VS</b>       | 159.1128        | 187.1077        |
| <b>VSV</b>      | 258.1812        | 286.1761        | <b>VSVF</b>     | 405.2496        | 433.2445        | <b>VSVFVG</b>   | 462.2711        | 490.2660        |
| <b>VSVFVG</b>   | 519.2926        | 547.2875        | <b>VSVFVGGV</b> | 618.3610        | 646.3559        | <b>VSVFVGGV</b> | 675.3824        | 703.3774        |
| <b>SV</b>       | 159.1128        | 187.1077        | <b>SVF</b>      | 306.1812        | 334.1761        | <b>SVFG</b>     | 363.2027        | 391.1976        |
| <b>SVFVG</b>    | 420.2241        | 448.2191        | <b>SVFVGGV</b>  | 519.2926        | 547.2875        | <b>SVFVGGV</b>  | 576.3140        | 604.3089        |
| <b>VF</b>       | 219.1492        | 247.1441        | <b>VFG</b>      | 276.1707        | 304.1656        | <b>VFGG</b>     | 333.1921        | <b>361.1870</b> |
| <b>VFGGV</b>    | 432.2605        | <b>460.2554</b> | <b>VFGGVG</b>   | 489.2820        | <b>517.2769</b> | <b>VFGGVGE</b>  | 618.3246        | 646.3195        |
| <b>FG</b>       | 177.1022        | 205.0972        | <b>FGG</b>      | 234.1237        | 262.1186        | <b>FGGV</b>     | 333.1921        | <b>361.1870</b> |
| <b>FGGVG</b>    | 390.2136        | 418.2085        | <b>FGGVGE</b>   | 519.2562        | 547.2511        | <b>GG</b>       | 87.0553         | 115.0502        |
| <b>GGV</b>      | 186.1237        | 214.1186        | <b>GGVG</b>     | 243.1452        | 271.1401        | <b>GGVGE</b>    | 372.1878        | <b>400.1827</b> |
| <b>GV</b>       | <b>129.1022</b> | 157.0972        | <b>GVG</b>      | 186.1237        | 214.1186        | <b>GVGE</b>     | 315.1663        | 343.1612        |
| <b>VG</b>       | <b>129.1022</b> | 157.0972        | <b>VGE</b>      | 258.1448        | 286.1397        | <b>GE</b>       | 159.0764        | 187.0713        |

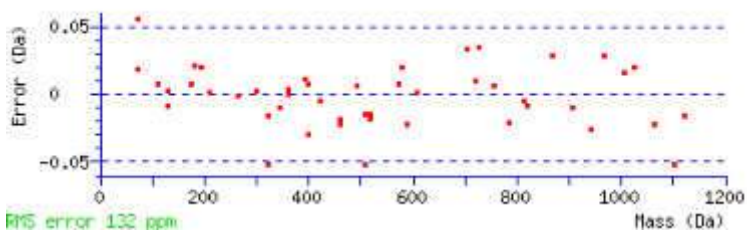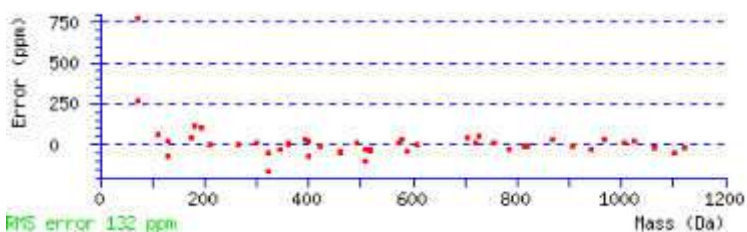

NCBI BLAST search of [AHGGVSVFVGGVGER](#)  
 (Parameters: blastp, nr protein database, expect=20000, no filter, PAM30)  
 Other BLAST [web gateways](#)

All matches to this query

| Score | Mr(calc)  | Delta  | Sequence                        |
|-------|-----------|--------|---------------------------------|
| 124.2 | 1327.6633 | 0.0347 | <a href="#">AHGGVSVFVGGVGER</a> |
| 124.2 | 1327.6633 | 0.0347 | <a href="#">AHGGVSVFVGGVGER</a> |
| 124.2 | 1327.6633 | 0.0347 | <a href="#">AHGGVSVFVGGVGER</a> |
| 124.2 | 1327.6633 | 0.0347 | <a href="#">AHGGVSVFVGGVGER</a> |

|       |           |        |                                |
|-------|-----------|--------|--------------------------------|
| 124.2 | 1327.6633 | 0.0347 | <a href="#">AHGGVSVFGGVGER</a> |
| 124.2 | 1327.6633 | 0.0347 | <a href="#">AHGGVSVFGGVGER</a> |
| 124.2 | 1327.6633 | 0.0347 | <a href="#">AHGGVSVFGGVGER</a> |
| 124.2 | 1327.6633 | 0.0347 | <a href="#">AHGGVSVFGGVGER</a> |
| 124.2 | 1327.6633 | 0.0347 | <a href="#">AHGGVSVFGGVGER</a> |
| 124.2 | 1327.6633 | 0.0347 | <a href="#">AHGGVSVFGGVGER</a> |

**Mascot:** <http://www.matrixscience.com/>



**MATRIX SCIENCE Mascot Search Results**

**Peptide View Spot no 114**

MS/MS Fragmentation of **IVGNEHYETAQR**

Found in **gi|11583** in **NCBI**nr, ATPase, beta subunit [Hordeum vulgare]

Match to Query 175: 1415.721924 from(1416.729200,1+) intensity(0.0000) index(18)

Title: Label: I1, Spot\_Id: 219682, Peak\_List\_Id: 225010, MSMS Job\_Run\_Id: 21761, Comment:

Data file C:\Documents and Settings\Administrator\Desktop\farah BHU\spot set plate\Farah-Garima 11May 2013\ppw\_I1\_136842037600.txt

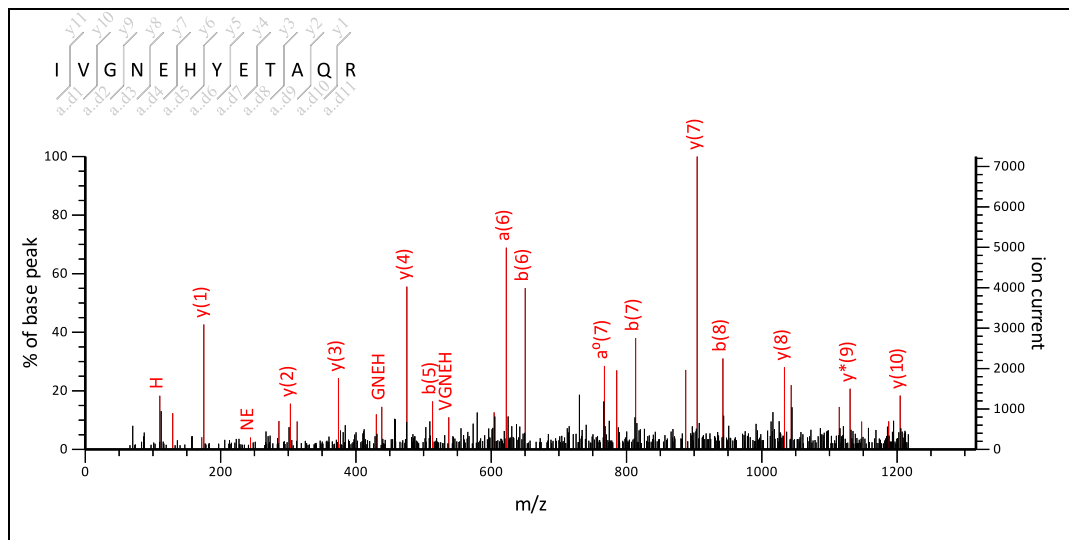

Navigation icons: Home, Back, Forward, Search, and a range input field from 0 to 1316.55.

Label all possible matches  Label matches used for scoring

Monoisotopic mass of neutral peptide Mr(calc): 1415.6793

Fixed modifications: Carbamidomethyl (C) (apply to specified residues or termini only)

Ions Score: 93 Expect: 1.1e-06

Matches : 36/181 fragment ions using 36 most intense peaks (help)

| #  | Immon.   | a         | a*        | a <sup>0</sup> | b         | b*        | b <sup>0</sup> | d         | d'        | Seq. | v         | w         | w'       | y         | y*        |
|----|----------|-----------|-----------|----------------|-----------|-----------|----------------|-----------|-----------|------|-----------|-----------|----------|-----------|-----------|
| 1  | 86.0964  | 86.0964   |           |                | 114.0913  |           |                | 44.0495   |           | I    |           |           |          |           |           |
| 2  | 72.0808  | 185.1648  |           |                | 213.1598  |           |                | 171.1492  |           | V    | 1259.5400 | 1272.5604 |          | 1303.6026 | 1286.5760 |
| 3  | 30.0338  | 242.1863  |           |                | 270.1812  |           |                |           |           | G    |           |           |          | 1204.5341 | 1187.5076 |
| 4  | 87.0553  | 356.2292  | 339.2027  |                | 384.2241  | 367.1976  |                | 313.2234  |           | N    | 1088.4756 | 1087.4803 |          | 1147.5127 | 1130.4861 |
| 5  | 102.0550 | 485.2718  | 468.2453  | 467.2613       | 513.2667  | 496.2402  | 495.2562       | 427.2663  |           | E    | 959.4330  | 958.4377  |          | 1033.4697 | 1016.4432 |
| 6  | 110.0713 | 622.3307  | 605.3042  | 604.3202       | 650.3256  | 633.2991  | 632.3151       |           |           | H    | 822.3741  |           |          | 904.4272  | 887.4006  |
| 7  | 136.0757 | 785.3941  | 768.3675  | 767.3835       | 813.3890  | 796.3624  | 795.3784       |           |           | Y    | 659.3107  |           |          | 767.3682  | 750.3417  |
| 8  | 102.0550 | 914.4367  | 897.4101  | 896.4261       | 942.4316  | 925.4050  | 924.4210       | 856.4312  |           | E    | 530.2681  | 529.2729  |          | 604.3049  | 587.2784  |
| 9  | 74.0600  | 1015.4843 | 998.4578  | 997.4738       | 1043.4793 | 1026.4527 | 1025.4687      | 999.4894  | 1001.4687 | T    | 429.2205  | 442.2409  | 444.2201 | 475.2623  | 458.2358  |
| 10 | 44.0495  | 1086.5214 | 1069.4949 | 1068.5109      | 1114.5164 | 1097.4898 | 1096.5058      |           |           | A    | 358.1833  |           |          | 374.2146  | 357.1881  |
| 11 | 101.0709 | 1214.5800 | 1197.5535 | 1196.5695      | 1242.5749 | 1225.5484 | 1224.5644      | 1157.5586 |           | Q    | 230.1248  | 229.1295  |          | 303.1775  | 286.1510  |
| 12 | 129.1135 |           |           |                |           |           |                |           |           | R    | 74.0237   | 73.0284   |          | 175.1190  | 158.0924  |

| Seq    | ya       | yb       | Seq     | ya       | yb       | Seq   | ya       | yb       |
|--------|----------|----------|---------|----------|----------|-------|----------|----------|
| VG     | 129.1022 | 157.0972 | VG N    | 243.1452 | 271.1401 | VG NE | 372.1878 | 400.1827 |
| VG NEH | 509.2467 | 537.2416 | VG NEHY | 672.3100 | 700.3049 | GN    | 144.0768 | 172.0717 |
| GNE    | 273.1193 | 301.1143 | GNEH    | 410.1783 | 438.1732 | GNEHY | 573.2416 | 601.2365 |
| NE     | 216.0979 | 244.0928 | NEH     | 353.1568 | 381.1517 | NEHY  | 516.2201 | 544.2150 |
| NEHYE  | 645.2627 | 673.2576 | EH      | 239.1139 | 267.1088 | EHY   | 402.1772 | 430.1721 |
| EHYE   | 531.2198 | 559.2147 | EHYET   | 632.2675 | 660.2624 | HY    | 273.1346 | 301.1295 |
| HYE    | 402.1772 | 430.1721 | HYET    | 503.2249 | 531.2198 | HYETA | 574.2620 | 602.2569 |
| YE     | 265.1183 | 293.1132 | YET     | 366.1660 | 394.1609 | YETA  | 437.2031 | 465.1980 |
| YETAQ  | 565.2617 | 593.2566 | ET      | 203.1026 | 231.0975 | ETA   | 274.1397 | 302.1347 |

|             |                 |                 |           |          |          |            |          |          |
|-------------|-----------------|-----------------|-----------|----------|----------|------------|----------|----------|
| <b>ETAQ</b> | 402.1983        | <b>430.1932</b> | <b>TA</b> | 145.0972 | 173.0921 | <b>TAQ</b> | 273.1557 | 301.1506 |
| <b>AQ</b>   | <b>172.1081</b> | 200.1030        |           |          |          |            |          |          |

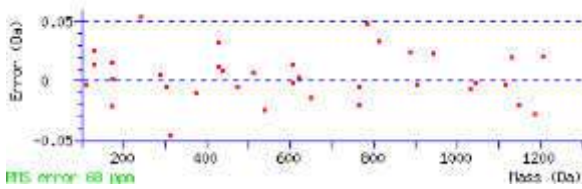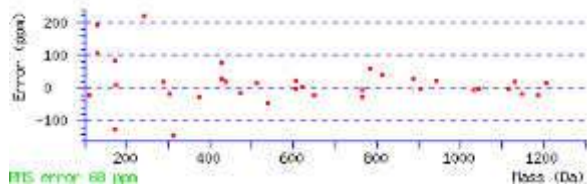

NCBI BLAST search of [IVGNEHYETAQR](#)

(Parameters: blastp, nr protein database, expect=20000, no filter, PAM30)

Other BLAST [web gateways](#)

#### All matches to this query

| Score | Mr(calc)  | Delta  | Sequence                     |
|-------|-----------|--------|------------------------------|
| 92.6  | 1415.6793 | 0.0426 | <a href="#">IVGNEHYETAQR</a> |
| 92.6  | 1415.6793 | 0.0426 | <a href="#">IVGNEHYETAQR</a> |
| 76.7  | 1415.7157 | 0.0062 | <a href="#">IVGDKHYETAQR</a> |
| 76.7  | 1415.7157 | 0.0062 | <a href="#">IVGDKHYETAQR</a> |
| 76.7  | 1415.6793 | 0.0426 | <a href="#">IVGDOHYETAQR</a> |
| 76.7  | 1415.6793 | 0.0426 | <a href="#">IVGENHYETAQR</a> |
| 76.7  | 1415.6793 | 0.0426 | <a href="#">IVGENHYETAQR</a> |
| 76.7  | 1415.7157 | 0.0062 | <a href="#">IVGKDHYETAQR</a> |
| 76.7  | 1415.7157 | 0.0062 | <a href="#">IVGKDHYETAQR</a> |
| 27.4  | 1415.7157 | 0.0062 | <a href="#">IVGDEHYKTAQR</a> |

Mascot: <http://www.matrixscience.com/>


**Mascot Search Results**
**Peptide View**      **Spot no 114**
MS/MS Fragmentation of **FVQAGSEVSALLGR**Found in **gi11583** in **NCBI**nr, ATPase, beta subunit [Hordeum vulgare]

Match to Query 181: 1432.815824 from(1433.823100,1+) intensity(0.0000) index(19)

Title: Label: I1, Spot\_Id: 219682, Peak\_List\_Id: 225016, MSMS Job\_Run\_Id: 21761, Comment:

Data file C:\Documents and Settings\Administrator\Desktop\farah BHU\spot set plate\Farah-Garima 11May 2013\ppw\_I1\_136842037600.txt

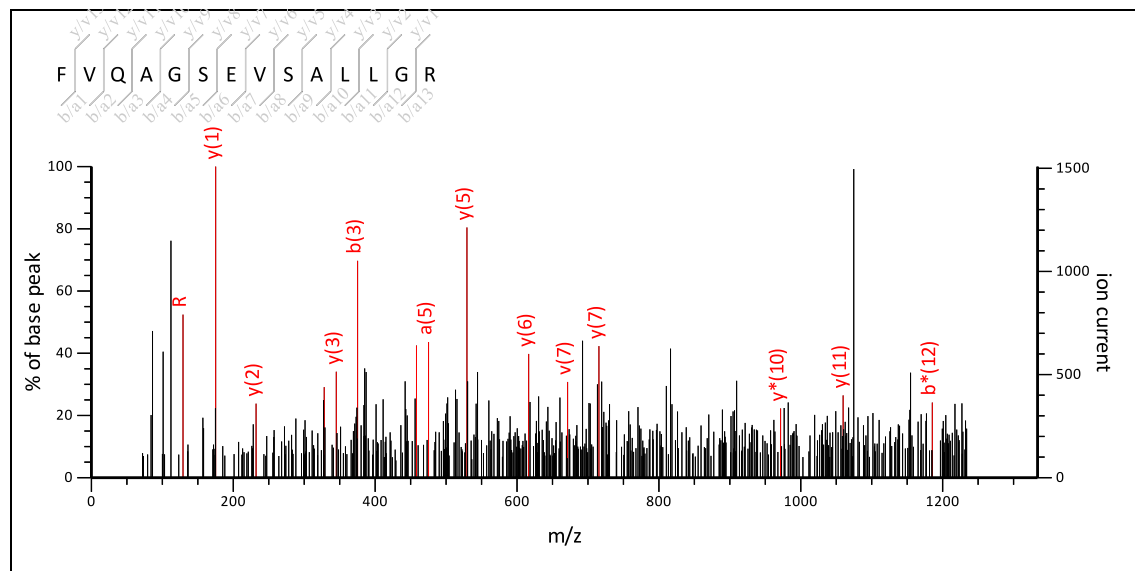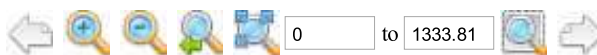Label all possible matches  Label matches used for scoring 

Monoisotopic mass of neutral peptide Mr(calc): 1432.7674

Fixed modifications: Carbamidomethyl (C) (apply to specified residues or termini only)

Ions Score: 47 Expect: 0.037

Matches : 23/243 fragment ions using 24 most intense peaks ([help](#))

| #  | Immon.   | a         | a*        | a <sup>0</sup> | b         | b*        | b <sup>0</sup> | d         | Seq. | v         | w         | y         | y*        | y <sup>0</sup> | #  |
|----|----------|-----------|-----------|----------------|-----------|-----------|----------------|-----------|------|-----------|-----------|-----------|-----------|----------------|----|
| 1  | 120.0808 | 120.0808  |           |                | 148.0757  |           |                | 44.0495   | F    |           |           |           |           |                | 14 |
| 2  | 72.0808  | 219.1492  |           |                | 247.1441  |           |                | 205.1335  | V    | 1242.6437 | 1255.6641 | 1286.7063 | 1269.6797 | 1268.6957      | 13 |
| 3  | 101.0709 | 347.2078  | 330.1812  |                | 375.2027  | 358.1761  |                | 290.1863  | Q    | 1114.5851 | 1113.5899 | 1187.6379 | 1170.6113 | 1169.6273      | 12 |
| 4  | 44.0495  | 418.2449  | 401.2183  |                | 446.2398  | 429.2132  |                |           | A    | 1043.5480 |           | 1059.5793 | 1042.5527 | 1041.5687      | 11 |
| 5  | 30.0338  | 475.2663  | 458.2398  |                | 503.2613  | 486.2347  |                |           | G    |           |           | 988.5422  | 971.5156  | 970.5316       | 10 |
| 6  | 60.0444  | 562.2984  | 545.2718  | 544.2878       | 590.2933  | 573.2667  | 572.2827       | 546.3035  | S    | 899.4945  | 898.4993  | 931.5207  | 914.4942  | 913.5102       | 9  |
| 7  | 102.0550 | 691.3410  | 674.3144  | 673.3304       | 719.3359  | 702.3093  | 701.3253       | 633.3355  | E    | 770.4519  | 769.4567  | 844.4887  | 827.4621  | 826.4781       | 8  |
| 8  | 72.0808  | 790.4094  | 773.3828  | 772.3988       | 818.4043  | 801.3777  | 800.3937       | 776.3937  | V    | 671.3835  | 684.4039  | 715.4461  | 698.4196  | 697.4355       | 7  |
| 9  | 60.0444  | 877.4414  | 860.4149  | 859.4308       | 905.4363  | 888.4098  | 887.4258       | 861.4465  | S    | 584.3515  | 583.3562  | 616.3777  | 599.3511  | 598.3671       | 6  |
| 10 | 44.0495  | 948.4785  | 931.4520  | 930.4680       | 976.4734  | 959.4469  | 958.4629       |           | A    | 513.3144  |           | 529.3457  | 512.3191  |                | 5  |
| 11 | 86.0964  | 1061.5626 | 1044.5360 | 1043.5520      | 1089.5575 | 1072.5310 | 1071.5469      | 1019.5156 | L    | 400.2303  | 399.2350  | 458.3085  | 441.2820  |                | 4  |
| 12 | 86.0964  | 1174.6466 | 1157.6201 | 1156.6361      | 1202.6416 | 1185.6150 | 1184.6310      | 1132.5997 | L    | 287.1462  | 286.1510  | 345.2245  | 328.1979  |                | 3  |
| 13 | 30.0338  | 1231.6681 | 1214.6416 | 1213.6575      | 1259.6630 | 1242.6365 | 1241.6525      |           | G    |           |           | 232.1404  | 215.1139  |                | 2  |
| 14 | 129.1135 |           |           |                |           |           |                |           | R    | 74.0237   | 73.0284   | 175.1190  | 158.0924  |                | 1  |

| Seq   | ya       | yb       | Seq    | ya       | yb       | Seq     | ya       | yb       |
|-------|----------|----------|--------|----------|----------|---------|----------|----------|
| VQ    | 200.1394 | 228.1343 | VQA    | 271.1765 | 299.1714 | VQAG    | 328.1979 | 356.1928 |
| VQAGS | 415.2300 | 443.2249 | VQAGSE | 544.2726 | 572.2675 | VQAGSEV | 643.3410 | 671.3359 |
| QA    | 172.1081 | 200.1030 | QAG    | 229.1295 | 257.1244 | QAGS    | 316.1615 | 344.1565 |
| QAGSE | 445.2041 | 473.1991 | QAGSEV | 544.2726 | 572.2675 | QAGSEVS | 631.3046 | 659.2995 |

|          |          |          |        |          |          |         |          |          |
|----------|----------|----------|--------|----------|----------|---------|----------|----------|
| AG       | 101.0709 | 129.0659 | AGS    | 188.1030 | 216.0979 | AGSE    | 317.1456 | 345.1405 |
| AGSEV    | 416.2140 | 444.2089 | AGSEVS | 503.2460 | 531.2409 | AGSEVSA | 574.2831 | 602.2780 |
| AGSEVSAL | 687.3672 | 715.3621 | GS     | 117.0659 | 145.0608 | GSE     | 246.1084 | 274.1034 |
| GSEV     | 345.1769 | 373.1718 | GSEVS  | 432.2089 | 460.2038 | GSEVSA  | 503.2460 | 531.2409 |
| GSEVSAL  | 616.3301 | 644.3250 | SE     | 189.0870 | 217.0819 | SEV     | 288.1554 | 316.1503 |
| SEVS     | 375.1874 | 403.1823 | SEVSA  | 446.2245 | 474.2195 | SEVSAL  | 559.3086 | 587.3035 |
| SEVSALL  | 672.3927 | 700.3876 | EV     | 201.1234 | 229.1183 | EVS     | 288.1554 | 316.1503 |
| EVSA     | 359.1925 | 387.1874 | EVSAL  | 472.2766 | 500.2715 | EVSALL  | 585.3606 | 613.3556 |
| EVSALLG  | 642.3821 | 670.3770 | VS     | 159.1128 | 187.1077 | VSA     | 230.1499 | 258.1448 |
| VSAL     | 343.2340 | 371.2289 | VSALL  | 456.3180 | 484.3130 | VSALLG  | 513.3395 | 541.3344 |
| SA       | 131.0815 | 159.0764 | SAL    | 244.1656 | 272.1605 | SALL    | 357.2496 | 385.2445 |
| SALLG    | 414.2711 | 442.2660 | AL     | 157.1335 | 185.1285 | ALL     | 270.2176 | 298.2125 |
| ALLG     | 327.2391 | 355.2340 | LL     | 199.1805 | 227.1754 | LLG     | 256.2020 | 284.1969 |
| LG       | 143.1179 | 171.1128 |        |          |          |         |          |          |

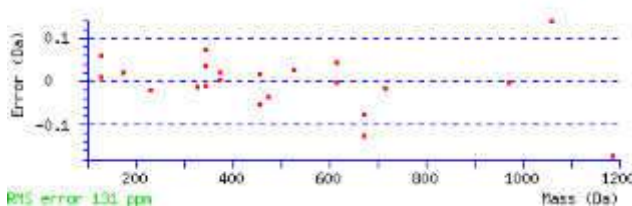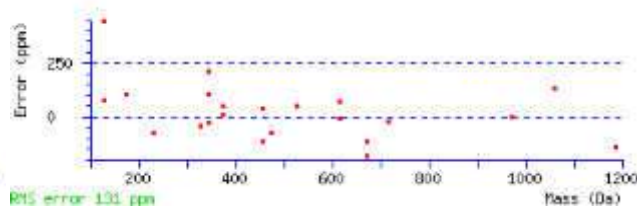

NCBI BLAST search of [FVOAGSEVSALLGR](#)

(Parameters: blastp, nr protein database, expect=20000, no filter, PAM30)

Other BLAST [web gateways](#)

#### All matches to this query

| Score | Mr(calc)  | Delta  | Sequence                       |
|-------|-----------|--------|--------------------------------|
| 47.4  | 1432.7674 | 0.0484 | <a href="#">FVOAGSEVSAILGR</a> |
| 47.4  | 1432.7674 | 0.0484 | <a href="#">FVOAGSEVSALIGR</a> |
| 47.4  | 1432.7674 | 0.0484 | <a href="#">FVOAGSEVSALLGR</a> |
| 47.4  | 1432.7674 | 0.0484 | <a href="#">FVOAGSEVSALLGR</a> |
| 47.4  | 1432.7674 | 0.0484 | <a href="#">FVOAGSEVSALLGR</a> |
| 47.4  | 1432.7674 | 0.0484 | <a href="#">FVOAGSEVSALLGR</a> |
| 47.4  | 1432.7674 | 0.0484 | <a href="#">FVOAGSEVSALLGR</a> |
| 47.4  | 1432.7674 | 0.0484 | <a href="#">FVOAGSEVSALLGR</a> |
| 47.4  | 1432.7674 | 0.0484 | <a href="#">FVOAGSEVSALLGR</a> |
| 47.4  | 1432.7674 | 0.0484 | <a href="#">FVOAGSEVSALLGR</a> |
| 47.4  | 1432.7674 | 0.0484 | <a href="#">FVOAGSEVSALLGR</a> |

Mascot: <http://www.matrixscience.com/>

**MATRIX SCIENCE Mascot Search Results**

**Peptide View Spot no 114**

MS/MS Fragmentation of **GIYPAVDPLDSTSTMLQPR**

Found in **gi|11583** in **NCBI**nr, ATPase, beta subunit [Hordeum vulgare]

Match to Query 232: 2076.058624 from(2077.065900,1+) intensity(0.0000) index(31)

Title: Label: I1, Spot\_Id: 219682, Peak\_List\_Id: 225028, MSMS Job\_Run\_Id: 21761, Comment:

Data file C:\Documents and Settings\Administrator\Desktop\farah BHU\spot set plate\Farah-Garima 11May 2013\ppw\_I1\_136842037600.txt

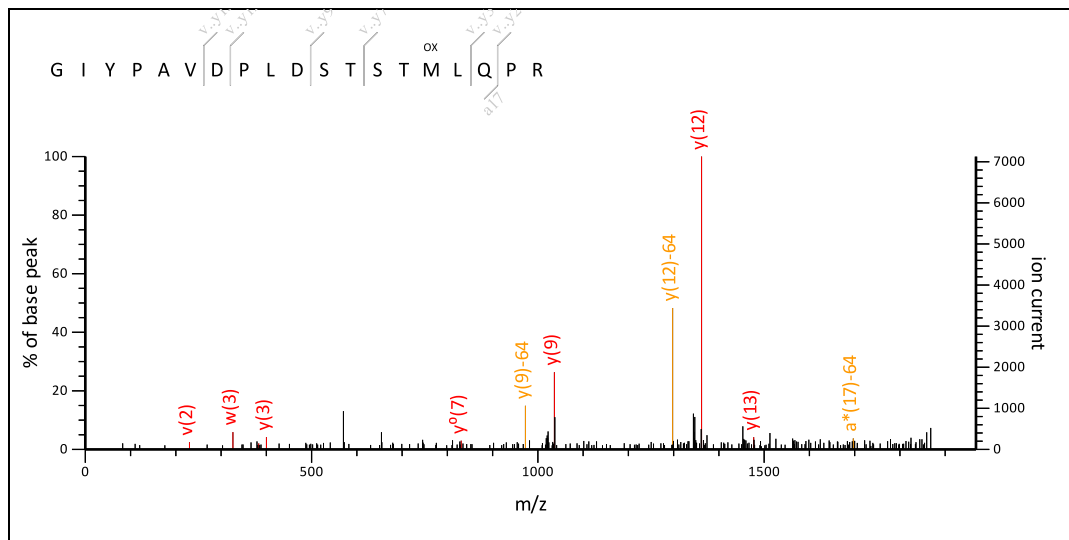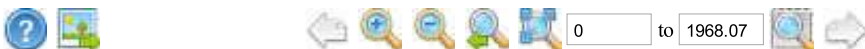

Label all possible matches  Label matches used for scoring

Monoisotopic mass of neutral peptide Mr(calc): 2076.0198

Fixed modifications: Carbamidomethyl (C) (apply to specified residues or termini only)

Variable modifications:

M15 : Oxidation (M), with neutral losses 0.0000 (shown in table), 63.9983

Ions Score: 2 Expect: 9.9e+02

Matches : 15/459 fragment ions using 36 most intense peaks (help)

| #  | Immon.   | a         | a*        | a <sup>0</sup> | b         | b*        | b <sup>0</sup> | d         | d'        | Seq. | v         | w         | w'        | y         | y*        |
|----|----------|-----------|-----------|----------------|-----------|-----------|----------------|-----------|-----------|------|-----------|-----------|-----------|-----------|-----------|
| 1  | 30.0338  | 30.0338   |           |                | 58.0287   |           |                | 44.0495   |           | G    |           |           |           |           |           |
| 2  | 86.0964  | 143.1179  |           |                | 171.1128  |           |                | 115.0866  | 129.1022  | I    | 1961.9273 | 1974.9477 | 1988.9634 | 2020.0056 | 2002.9790 |
| 3  | 136.0757 | 306.1812  |           |                | 334.1761  |           |                |           |           | Y    | 1798.8640 |           |           | 1906.9215 | 1889.8950 |
| 4  | 70.0651  | 403.2340  |           |                | 431.2289  |           |                | 377.2183  |           | P    | 1701.8112 | 1700.8160 |           | 1743.8582 | 1726.8316 |
| 5  | 44.0495  | 474.2711  |           |                | 502.2660  |           |                |           |           | A    | 1630.7741 |           |           | 1646.8054 | 1629.7789 |
| 6  | 72.0808  | 573.3395  |           |                | 601.3344  |           |                | 559.3239  |           | V    | 1531.7057 | 1544.7261 |           | 1575.7683 | 1558.7418 |
| 7  | 88.0393  | 688.3665  |           | 670.3559       | 716.3614  |           | 698.3508       | 644.3766  |           | D    | 1416.6788 | 1415.6835 |           | 1476.6999 | 1459.6733 |
| 8  | 70.0651  | 785.4192  |           | 767.4087       | 813.4141  |           | 795.4036       | 759.4036  |           | P    | 1319.6260 | 1318.6307 |           | 1361.6729 | 1344.6464 |
| 9  | 86.0964  | 898.5033  |           | 880.4927       | 926.4982  |           | 908.4876       | 856.4563  |           | L    | 1206.5419 | 1205.5467 |           | 1264.6202 | 1247.5936 |
| 10 | 88.0393  | 1013.5302 |           | 995.5197       | 1041.5251 |           | 1023.5146      | 969.5404  |           | D    | 1091.5150 | 1090.5197 |           | 1151.5361 | 1134.5096 |
| 11 | 60.0444  | 1100.5623 |           | 1082.5517      | 1128.5572 |           | 1110.5466      | 1084.5673 |           | S    | 1004.4830 | 1003.4877 |           | 1036.5092 | 1019.4826 |
| 12 | 74.0600  | 1201.6099 |           | 1183.5994      | 1229.6048 |           | 1211.5943      | 1185.6150 | 1187.5943 | T    | 903.4353  | 916.4557  | 918.4349  | 949.4771  | 932.4506  |
| 13 | 60.0444  | 1288.6420 |           | 1270.6314      | 1316.6369 |           | 1298.6263      | 1272.6470 |           | S    | 816.4033  | 815.4080  |           | 848.4295  | 831.4029  |
| 14 | 74.0600  | 1389.6896 |           | 1371.6791      | 1417.6846 |           | 1399.6740      | 1373.6947 | 1375.6740 | T    | 715.3556  | 728.3760  | 730.3552  | 761.3974  | 744.3709  |
| 15 | 120.0478 | 1536.7250 |           | 1518.7145      | 1564.7200 |           | 1546.7094      | 1460.7268 |           | M    | 568.3202  | 567.3249  |           | 660.3498  | 643.3232  |
| 16 | 86.0964  | 1649.8091 |           | 1631.7985      | 1677.8040 |           | 1659.7935      | 1607.7622 |           | L    | 455.2361  | 454.2409  |           | 513.3144  | 496.2878  |
| 17 | 101.0709 | 1777.8677 | 1760.8411 | 1759.8571      | 1805.8626 | 1788.8360 | 1787.8520      | 1720.8462 |           | Q    | 327.1775  | 326.1823  |           | 400.2303  | 383.2037  |
| 18 | 70.0651  | 1874.9204 | 1857.8939 | 1856.9099      | 1902.9154 | 1885.8888 | 1884.9048      | 1848.9048 |           | P    | 230.1248  | 229.1295  |           | 272.1717  | 255.1452  |
| 19 | 129.1135 |           |           |                |           |           |                |           |           | R    | 74.0237   | 73.0284   |           | 175.1190  | 158.0924  |

| Seq     | ya       | yb       | Seq    | ya       | yb       | Seq     | ya       | yb       |
|---------|----------|----------|--------|----------|----------|---------|----------|----------|
| IY      | 249.1598 | 277.1547 | IYP    | 346.2125 | 374.2074 | IYPA    | 417.2496 | 445.2445 |
| IYPAV   | 516.3180 | 544.3130 | IYPAVD | 631.3450 | 659.3399 | YP      | 233.1285 | 261.1234 |
| YPA     | 304.1656 | 332.1605 | YPAV   | 403.2340 | 431.2289 | YPAVD   | 518.2609 | 546.2558 |
| YPAVDP  | 615.3137 | 643.3086 | PA     | 141.1022 | 169.0972 | PAV     | 240.1707 | 268.1656 |
| PAVD    | 355.1976 | 383.1925 | PAVDP  | 452.2504 | 480.2453 | PAVDPL  | 565.3344 | 593.3293 |
| PAVDPLD | 680.3614 | 708.3563 | AV     | 143.1179 | 171.1128 | AVD     | 258.1448 | 286.1397 |
| AVDP    | 355.1976 | 383.1925 | AVDPL  | 468.2817 | 496.2766 | AVDPLD  | 583.3086 | 611.3035 |
| AVDPLDS | 670.3406 | 698.3355 | VD     | 187.1077 | 215.1026 | VDP     | 284.1605 | 312.1554 |
| VDPL    | 397.2445 | 425.2395 | VDPLD  | 512.2715 | 540.2664 | VDPLDS  | 599.3035 | 627.2984 |
| DP      | 185.0921 | 213.0870 | DPL    | 298.1761 | 326.1710 | DPLD    | 413.2031 | 441.1980 |
| DPLDS   | 500.2351 | 528.2300 | DPLDST | 601.2828 | 629.2777 | DPLDSTS | 688.3148 | 716.3097 |
| PL      | 183.1492 | 211.1441 | PLD    | 298.1761 | 326.1710 | PLDS    | 385.2082 | 413.2031 |
| PLDST   | 486.2558 | 514.2508 | PLDSTS | 573.2879 | 601.2828 | PLDSTST | 674.3355 | 702.3305 |
| LD      | 201.1234 | 229.1183 | LDS    | 288.1554 | 316.1503 | LDST    | 389.2031 | 417.1980 |
| LDSTS   | 476.2351 | 504.2300 | LDSTST | 577.2828 | 605.2777 | DS      | 175.0713 | 203.0662 |
| DST     | 276.1190 | 304.1139 | DSTS   | 363.1510 | 391.1460 | DSTST   | 464.1987 | 492.1936 |
| DSTSTM  | 611.2341 | 639.2290 | ST     | 161.0921 | 189.0870 | STS     | 248.1241 | 276.1190 |
| STST    | 349.1718 | 377.1667 | STSTM  | 496.2072 | 524.2021 | STSTML  | 609.2912 | 637.2862 |
| TS      | 161.0921 | 189.0870 | TST    | 262.1397 | 290.1347 | TSTM    | 409.1751 | 437.1701 |
| TSTML   | 522.2592 | 550.2541 | TSTMLQ | 650.3178 | 678.3127 | ST      | 161.0921 | 189.0870 |
| STM     | 308.1275 | 336.1224 | STML   | 421.2115 | 449.2064 | STMLQ   | 549.2701 | 577.2650 |
| STMLQP  | 646.3229 | 674.3178 | TM     | 221.0954 | 249.0904 | TML     | 334.1795 | 362.1744 |
| TMLQ    | 462.2381 | 490.2330 | TMLQP  | 559.2908 | 587.2858 | ML      | 233.1318 | 261.1267 |
| MLQ     | 361.1904 | 389.1853 | MLQP   | 458.2432 | 486.2381 | LQ      | 214.1550 | 242.1499 |
| LQP     | 311.2078 | 339.2027 | QP     | 198.1237 | 226.1186 |         |          |          |

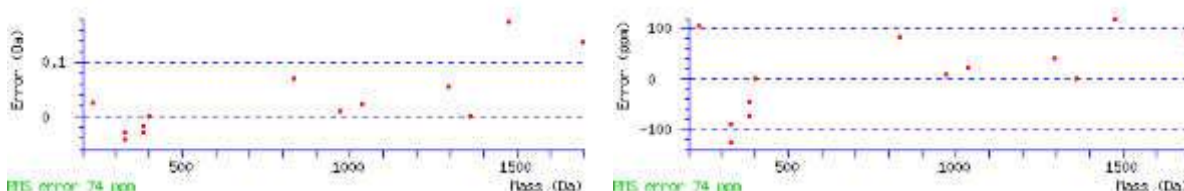

NCBI BLAST search of [GIYPAVDPLDSTSTMLQPR](#)  
 (Parameters: blastp, nr protein database, expect=20000, no filter, PAM30)  
 Other BLAST [web gateways](#)

All matches to this query

| Score | Mr(calcd) | Delta   | Sequence                            |
|-------|-----------|---------|-------------------------------------|
| 3.9   | 2076.0595 | -0.0009 | <a href="#">TORMILTOEEMEEVVLK</a>   |
| 2.0   | 2076.0198 | 0.0389  | <a href="#">GIYPAVDPLDSTSTMLQPR</a> |
| 2.0   | 2076.0561 | 0.0025  | <a href="#">GIYPAVDPLDSTSTMLKPR</a> |
| 2.0   | 2076.0198 | 0.0389  | <a href="#">GIYPAVDPLDSTSTMLQPR</a> |
| 2.0   | 2076.0198 | 0.0389  | <a href="#">GIYPAVDPLDSTSTMLQPR</a> |
| 2.0   | 2076.0198 | 0.0389  | <a href="#">GIYPAVDPLDSTSTMLQPR</a> |
| 2.0   | 2076.0198 | 0.0389  | <a href="#">GIYPAVDPLDSTSTMLQPR</a> |
| 2.0   | 2076.0198 | 0.0389  | <a href="#">GIYPAVDPLDSTSTMLQPR</a> |
| 2.0   | 2076.0198 | 0.0389  | <a href="#">GIYPAVDPLDSTSTMLQPR</a> |
| 2.0   | 2076.0198 | 0.0389  | <a href="#">GIYPAVDPLDSTSTMLQPR</a> |
| 2.0   | 2076.0198 | 0.0389  | <a href="#">GIYPAVDPLDSTSTMLQPR</a> |

Mascot: <http://www.matrixscience.com/>


**Mascot Search Results**
**Peptide View**    **Spot no 114**
MS/MS Fragmentation of **GMEVIDTGAPLSVPVGGATLGR**Found in **gi11583** in **NCBIInr**, ATPase, beta subunit [Hordeum vulgare]

Match to Query 234: 2112.123324 from(2113.130600,1+) intensity(0.0000) index(32)

Title: Label: I1, Spot\_Id: 219682, Peak\_List\_Id: 225041, MSMS Job\_Run\_Id: 21761, Comment:

Data file C:\Documents and Settings\Administrator\Desktop\farah BHU\spot set plate\Farah-Garima 11May 2013\ppw\_I1\_136842037600.txt

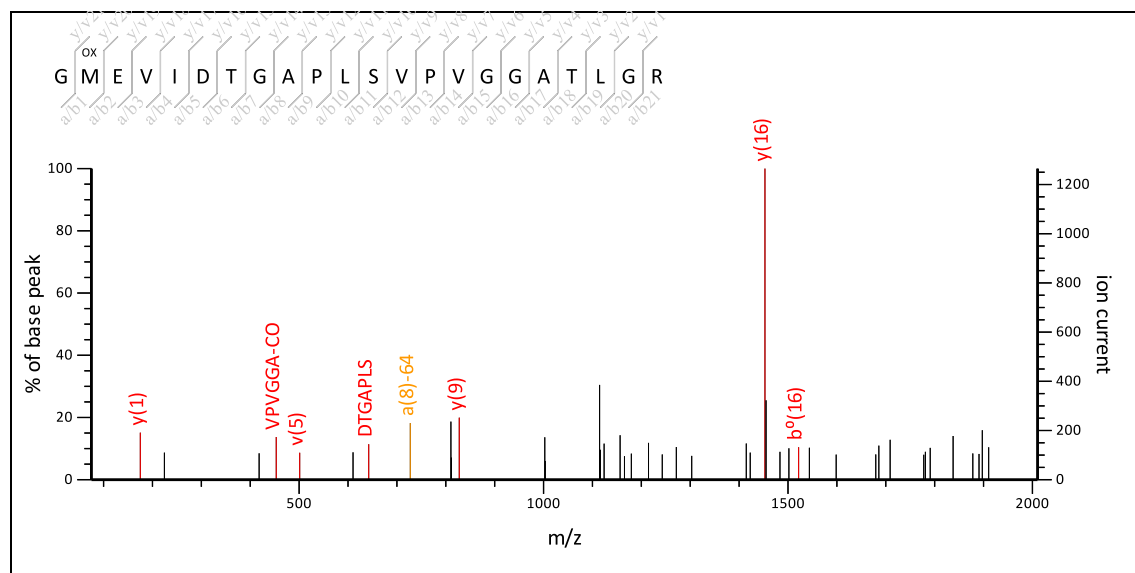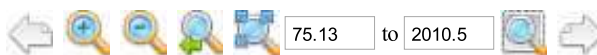Label all possible matches  Label matches used for scoring Monoisotopic mass of neutral peptide **Mr(calc)**: 2112.0885

Fixed modifications: Carbamidomethyl (C) (apply to specified residues or termini only)

Variable modifications:

M2 : Oxidation (M), with neutral losses 63.9983 (shown in table), 0.0000

Ions Score: 3 Expect: 6.6e+02

Matches : 8/535 fragment ions using 16 most intense peaks ([help](#))

| #  | Immon.   | a               | a <sup>0</sup> | b         | b <sup>0</sup> | d         | d'       | Seq. | v         | w         | w'        | y                | y*        | y <sup>0</sup> | #  |
|----|----------|-----------------|----------------|-----------|----------------|-----------|----------|------|-----------|-----------|-----------|------------------|-----------|----------------|----|
| 1  | 30.0338  | 30.0338         |                | 58.0287   |                | 44.0495   |          | G    |           |           |           |                  |           |                | 22 |
| 2  | 56.0495  | 113.0709        |                | 141.0659  |                | 101.0709  |          | M    | 1964.0447 | 1963.0495 |           | 1992.0760        | 1975.0495 | 1974.0655      | 21 |
| 3  | 102.0550 | 242.1135        | 224.1030       | 270.1084  | 252.0979       | 184.1081  |          | E    | 1835.0021 | 1834.0069 |           | 1909.0389        | 1892.0124 | 1891.0284      | 20 |
| 4  | 72.0808  | 341.1819        | 323.1714       | 369.1769  | 351.1663       | 327.1663  |          | V    | 1735.9337 | 1748.9541 |           | 1779.9963        | 1762.9698 | 1761.9858      | 19 |
| 5  | 86.0964  | 454.2660        | 436.2554       | 482.2609  | 464.2504       | 426.2347  | 440.2504 | I    | 1622.8497 | 1635.8701 | 1649.8857 | 1680.9279        | 1663.9014 | 1662.9173      | 18 |
| 6  | 88.0393  | 569.2930        | 551.2824       | 597.2879  | 579.2773       | 525.3031  |          | D    | 1507.8227 | 1506.8275 |           | 1567.8438        | 1550.8173 | 1549.8333      | 17 |
| 7  | 74.0600  | 670.3406        | 652.3301       | 698.3355  | 680.3250       | 654.3457  | 656.3250 | T    | 1406.7750 | 1419.7954 | 1421.7747 | <b>1452.8169</b> | 1435.7904 | 1434.8063      | 16 |
| 8  | 30.0338  | <b>727.3621</b> | 709.3515       | 755.3570  | 737.3464       |           |          | G    |           |           |           | 1351.7692        | 1334.7427 | 1333.7587      | 15 |
| 9  | 44.0495  | 798.3992        | 780.3886       | 826.3941  | 808.3836       |           |          | A    | 1278.7165 |           |           | 1294.7478        | 1277.7212 | 1276.7372      | 14 |
| 10 | 70.0651  | 895.4520        | 877.4414       | 923.4469  | 905.4363       | 869.4363  |          | P    | 1181.6637 | 1180.6684 |           | 1223.7106        | 1206.6841 | 1205.7001      | 13 |
| 11 | 86.0964  | 1008.5360       | 990.5255       | 1036.5310 | 1018.5204      | 966.4891  |          | L    | 1068.5796 | 1067.5844 |           | 1126.6579        | 1109.6313 | 1108.6473      | 12 |
| 12 | 60.0444  | 1095.5681       | 1077.5575      | 1123.5630 | 1105.5524      | 1079.5732 |          | S    | 981.5476  | 980.5524  |           | 1013.5738        | 996.5473  | 995.5633       | 11 |
| 13 | 72.0808  | 1194.6365       | 1176.6259      | 1222.6314 | 1204.6208      | 1180.6208 |          | V    | 882.4792  | 895.4996  |           | 926.5418         | 909.5152  | 908.5312       | 10 |
| 14 | 70.0651  | 1291.6892       | 1273.6787      | 1319.6842 | 1301.6736      | 1265.6736 |          | P    | 785.4264  | 784.4312  |           | <b>827.4734</b>  | 810.4468  | 809.4628       | 9  |
| 15 | 72.0808  | 1390.7577       | 1372.7471      | 1418.7526 | 1400.7420      | 1376.7420 |          | V    | 686.3580  | 699.3784  |           | 730.4206         | 713.3941  | 712.4100       | 8  |
| 16 | 30.0338  | 1447.7791       | 1429.7686      | 1475.7740 | 1457.7635      |           |          | G    |           |           |           | 631.3522         | 614.3257  | 613.3416       | 7  |
| 17 | 30.0338  | 1504.8006       | 1486.7900      | 1532.7955 | 1514.7849      |           |          | G    |           |           |           | 574.3307         | 557.3042  | 556.3202       | 6  |



|    |          |           |           |           |           |           |           |  |   |          |          |          |          |          |          |   |
|----|----------|-----------|-----------|-----------|-----------|-----------|-----------|--|---|----------|----------|----------|----------|----------|----------|---|
| 18 | 44.0495  | 1575.8377 | 1557.8271 | 1603.8326 | 1585.8221 |           |           |  | A | 501.2780 |          |          | 517.3093 | 500.2827 | 499.2987 | 5 |
| 19 | 74.0600  | 1676.8854 | 1658.8748 | 1704.8803 | 1686.8697 | 1660.8905 | 1662.8697 |  | T | 400.2303 | 413.2507 | 415.2300 | 446.2722 | 429.2456 | 428.2616 | 4 |
| 20 | 86.0964  | 1789.9694 | 1771.9589 | 1817.9644 | 1799.9538 | 1747.9225 |           |  | L | 287.1462 | 286.1510 |          | 345.2245 | 328.1979 |          | 3 |
| 21 | 30.0338  | 1846.9909 | 1828.9803 | 1874.9858 | 1856.9753 |           |           |  | G |          |          |          | 232.1404 | 215.1139 |          | 2 |
| 22 | 129.1135 |           |           |           |           |           |           |  | R | 74.0237  | 73.0284  |          | 175.1190 | 158.0924 |          | 1 |

| Seq      | ya       | yb       | Seq      | ya       | yb       | Seq      | ya       | yb       |
|----------|----------|----------|----------|----------|----------|----------|----------|----------|
| ME       | 185.0921 | 213.0870 | MEV      | 284.1605 | 312.1554 | MEVI     | 397.2445 | 425.2395 |
| MEVID    | 512.2715 | 540.2664 | MEVIDT   | 613.3192 | 641.3141 | MEVIDTG  | 670.3406 | 698.3355 |
| EV       | 201.1234 | 229.1183 | EVI      | 314.2074 | 342.2023 | EVID     | 429.2344 | 457.2293 |
| EVIDT    | 530.2821 | 558.2770 | EVIDTG   | 587.3035 | 615.2984 | EVIDTGA  | 658.3406 | 686.3355 |
| VI       | 185.1648 | 213.1598 | VID      | 300.1918 | 328.1867 | VIDT     | 401.2395 | 429.2344 |
| VIDTG    | 458.2609 | 486.2558 | VIDTGA   | 529.2980 | 557.2930 | VIDTGAP  | 626.3508 | 654.3457 |
| ID       | 201.1234 | 229.1183 | IDT      | 302.1710 | 330.1660 | IDTG     | 359.1925 | 387.1874 |
| IDTGA    | 430.2296 | 458.2245 | IDTGAP   | 527.2824 | 555.2773 | IDTGAPL  | 640.3665 | 668.3614 |
| DT       | 189.0870 | 217.0819 | DTG      | 246.1084 | 274.1034 | DTGA     | 317.1456 | 345.1405 |
| DTGAP    | 414.1983 | 442.1932 | DTGAPL   | 527.2824 | 555.2773 | DTGAPLS  | 614.3144 | 642.3093 |
| TG       | 131.0815 | 159.0764 | TGA      | 202.1186 | 230.1135 | TGAP     | 299.1714 | 327.1663 |
| TGAPL    | 412.2554 | 440.2504 | TGAPLS   | 499.2875 | 527.2824 | TGAPLSV  | 598.3559 | 626.3508 |
| TGAPLSVP | 695.4087 | 723.4036 | GA       | 101.0709 | 129.0659 | GAP      | 198.1237 | 226.1186 |
| GAPL     | 311.2078 | 339.2027 | GAPLS    | 398.2398 | 426.2347 | GAPLSV   | 497.3082 | 525.3031 |
| GAPLSVP  | 594.3610 | 622.3559 | GAPLSVPV | 693.4294 | 721.4243 | AP       | 141.1022 | 169.0972 |
| APL      | 254.1863 | 282.1812 | APLS     | 341.2183 | 369.2132 | APLSV    | 440.2867 | 468.2817 |
| APLSVP   | 537.3395 | 565.3344 | APLSVPV  | 636.4079 | 664.4028 | APLSVPVG | 693.4294 | 721.4243 |
| PL       | 183.1492 | 211.1441 | PLS      | 270.1812 | 298.1761 | PLSV     | 369.2496 | 397.2445 |
| PLSVP    | 466.3024 | 494.2973 | PLSVPV   | 565.3708 | 593.3657 | PLSVPVG  | 622.3923 | 650.3872 |
| PLSVPVGG | 679.4137 | 707.4087 | LS       | 173.1285 | 201.1234 | LSV      | 272.1969 | 300.1918 |
| LSVP     | 369.2496 | 397.2445 | LSVPV    | 468.3180 | 496.3130 | LSVPVG   | 525.3395 | 553.3344 |
| LSVPVGG  | 582.3610 | 610.3559 | LSVPVGA  | 653.3981 | 681.3930 | SV       | 159.1128 | 187.1077 |
| SVP      | 256.1656 | 284.1605 | SVPV     | 355.2340 | 383.2289 | SVPVG    | 412.2554 | 440.2504 |
| SVPVGG   | 469.2769 | 497.2718 | SVPVGA   | 540.3140 | 568.3089 | SVPVGGAT | 641.3617 | 669.3566 |
| VP       | 169.1335 | 197.1285 | VPV      | 268.2020 | 296.1969 | VPVG     | 325.2234 | 353.2183 |
| VPVGG    | 382.2449 | 410.2398 | VPVGA    | 453.2820 | 481.2769 | VPVGGAT  | 554.3297 | 582.3246 |
| VPVGGATL | 667.4137 | 695.4087 | PV       | 169.1335 | 197.1285 | PVG      | 226.1550 | 254.1499 |
| PVGG     | 283.1765 | 311.1714 | PVGA     | 354.2136 | 382.2085 | PVGGAT   | 455.2613 | 483.2562 |
| PVGGATL  | 568.3453 | 596.3402 | PVGGATLG | 625.3668 | 653.3617 | VG       | 129.1022 | 157.0972 |
| VGG      | 186.1237 | 214.1186 | VGA      | 257.1608 | 285.1557 | VGGAT    | 358.2085 | 386.2034 |
| VGGATL   | 471.2926 | 499.2875 | VGGATLG  | 528.3140 | 556.3089 | GG       | 87.0553  | 115.0502 |
| GGA      | 158.0924 | 186.0873 | GGAT     | 259.1401 | 287.1350 | GGATL    | 372.2241 | 400.2191 |
| GGATLG   | 429.2456 | 457.2405 | GA       | 101.0709 | 129.0659 | GAT      | 202.1186 | 230.1135 |
| GATL     | 315.2027 | 343.1976 | GATLG    | 372.2241 | 400.2191 | AT       | 145.0972 | 173.0921 |
| ATL      | 258.1812 | 286.1761 | ATLG     | 315.2027 | 343.1976 | TL       | 187.1441 | 215.1390 |
| TLG      | 244.1656 | 272.1605 | LG       | 143.1179 | 171.1128 |          |          |          |

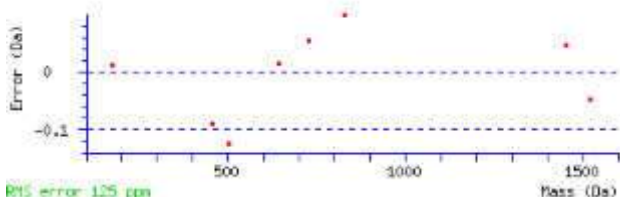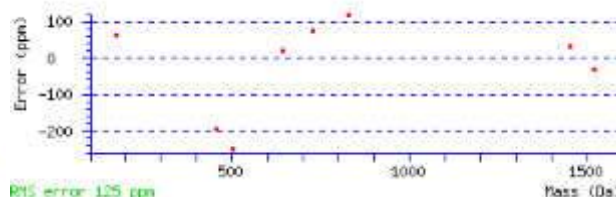

NCBI BLAST search of [GMEVIDTGAPLSVPVGGATLGR](#)  
 (Parameters: blastp, nr protein database, expect=20000, no filter, PAM30)  
 Other BLAST [web gateways](#)

## All matches to this query

| Score | Mr(calc)  | Delta  | Sequence                               |
|-------|-----------|--------|----------------------------------------|
| 6.2   | 2112.0819 | 0.0414 | <a href="#">EMGAQKPOIONPTAIMIAR</a>    |
| 5.2   | 2111.9793 | 0.1440 | <a href="#">SSTSNDFOLIQQLTEDR</a>      |
| 3.4   | 2112.0885 | 0.0348 | <a href="#">GMEVIDTGAPISVPVGGATLGR</a> |
| 3.4   | 2112.0885 | 0.0348 | <a href="#">GMEVIDTGAPISVPVGGATLGR</a> |
| 3.4   | 2112.0885 | 0.0348 | <a href="#">GMEVIDTGAPISVPVGGATLGR</a> |
| 3.4   | 2112.0885 | 0.0348 | <a href="#">GMEVIDTGAPISVPVGGATLGR</a> |
| 3.4   | 2112.0885 | 0.0348 | <a href="#">GMEVIDTGAPISVPVGGATLGR</a> |
| 3.4   | 2112.0885 | 0.0348 | <a href="#">GMEVIDTGAPLSVPVGGATIGR</a> |
| 3.4   | 2112.0885 | 0.0348 | <a href="#">GMEVIDTGAPLSVPVGGATLGR</a> |
| 3.4   | 2112.0885 | 0.0348 | <a href="#">GMEVIDTGAPLSVPVGGATLGR</a> |
| 3.4   | 2112.0885 | 0.0348 | <a href="#">GMEVIDTGAPLSVPVGGATLGR</a> |

Mascot: <http://www.matrixscience.com/>


**Mascot Search Results**
**Peptide View**      **Spot no 116**
MS/MS Fragmentation of **LGCIEDTGNHKR**Found in **gi|115477014** in **NCBI nr**, Os08g0487800 [Oryza sativa Japonica Group]

Match to Query 38: 1398.791424 from(1399.798700,1+) intensity(0.0000) index(13)

Title: Label M6, Spot\_Id: 219766, Peak\_List\_Id: 226016, MSMS Job\_Run\_Id: 21831, Comment:

Data file C:\Documents and Settings\Administrator\Desktop\Farah-Garima 11May 2013\ppw\_M6\_136859901000.txt

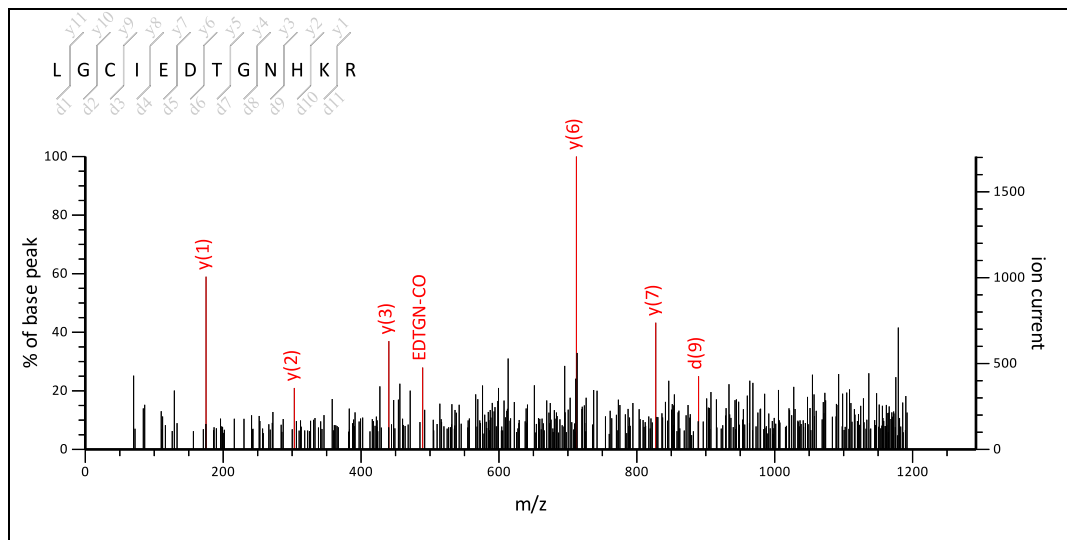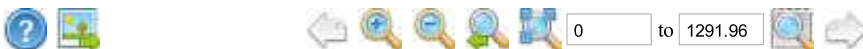Label all possible matches  Label matches used for scoring 

Monoisotopic mass of neutral peptide Mr(calc): 1398.6674

Fixed modifications: Carbamidomethyl (C) (apply to specified residues or termini only)

Ions Score: 25 Expect: 1e+02

Matches : 9/181 fragment ions using 12 most intense peaks ([help](#))

| #  | Immon.   | a               | a*        | a <sup>0</sup> | b         | b*        | b <sup>0</sup> | d               | d'       | Seq. | v         | w         | w'        | y               | y*        |
|----|----------|-----------------|-----------|----------------|-----------|-----------|----------------|-----------------|----------|------|-----------|-----------|-----------|-----------------|-----------|
| 1  | 86.0964  | 86.0964         |           |                | 114.0913  |           |                | 44.0495         |          | L    |           |           |           |                 |           |
| 2  | 30.0338  | 143.1179        |           |                | 171.1128  |           |                |                 |          | G    |           |           |           | 1286.5906       | 1269.5641 |
| 3  | 133.0430 | <b>303.1485</b> |           |                | 331.1435  |           |                | 214.1550        |          | C    | 1124.5443 | 1123.5491 |           | 1229.5691       | 1212.5426 |
| 4  | 86.0964  | 416.2326        |           |                | 444.2275  |           |                | 388.2013        | 402.2170 | I    | 1011.4602 | 1024.4806 | 1038.4963 | 1069.5385       | 1052.5119 |
| 5  | 102.0550 | 545.2752        |           | 527.2646       | 573.2701  |           | 555.2595       | 487.2697        |          | E    | 882.4177  | 881.4224  |           | 956.4544        | 939.4279  |
| 6  | 88.0393  | 660.3021        |           | 642.2916       | 688.2971  |           | 670.2865       | 616.3123        |          | D    | 767.3907  | 766.3955  |           | <b>827.4118</b> | 810.3853  |
| 7  | 74.0600  | 761.3498        |           | 743.3393       | 789.3447  |           | 771.3342       | 745.3549        | 747.3342 | T    | 666.3430  | 679.3634  | 681.3427  | <b>712.3849</b> | 695.3583  |
| 8  | 30.0338  | 818.3713        |           | 800.3607       | 846.3662  |           | 828.3556       |                 |          | G    |           |           |           | 611.3372        | 594.3107  |
| 9  | 87.0553  | 932.4142        | 915.3877  | 914.4036       | 960.4091  | 943.3826  | 942.3986       | <b>889.4084</b> |          | N    | 495.2786  | 494.2834  |           | 554.3158        | 537.2892  |
| 10 | 110.0713 | 1069.4731       | 1052.4466 | 1051.4626      | 1097.4680 | 1080.4415 | 1079.4575      |                 |          | H    | 358.2197  |           |           | <b>440.2728</b> | 423.2463  |
| 11 | 101.1073 | 1197.5681       | 1180.5415 | 1179.5575      | 1225.5630 | 1208.5364 | 1207.5524      | 1140.5102       |          | K    | 230.1248  | 229.1295  |           | <b>303.2139</b> | 286.1874  |
| 12 | 129.1135 |                 |           |                |           |           |                |                 |          | R    | 74.0237   | 73.0284   |           | <b>175.1190</b> | 158.0924  |

| Seq    | ya              | yb       | Seq    | ya              | yb       | Seq    | ya       | yb       |
|--------|-----------------|----------|--------|-----------------|----------|--------|----------|----------|
| GC     | 190.0645        | 218.0594 | GCI    | <b>303.1485</b> | 331.1435 | GCIE   | 432.1911 | 460.1860 |
| GCIED  | 547.2181        | 575.2130 | GCIEDT | 648.2658        | 676.2607 | CI     | 246.1271 | 274.1220 |
| CIE    | 375.1697        | 403.1646 | CIED   | 490.1966        | 518.1915 | CIEDT  | 591.2443 | 619.2392 |
| CIEDTG | 648.2658        | 676.2607 | IE     | 215.1390        | 243.1339 | IED    | 330.1660 | 358.1609 |
| IEDT   | 431.2136        | 459.2086 | IEDTG  | 488.2351        | 516.2300 | IEDTGN | 602.2780 | 630.2729 |
| ED     | 217.0819        | 245.0768 | EDT    | 318.1296        | 346.1245 | EDTG   | 375.1510 | 403.1460 |
| EDTGN  | <b>489.1940</b> | 517.1889 | EDTGNH | 626.2529        | 654.2478 | DT     | 189.0870 | 217.0819 |
| DTG    | 246.1084        | 274.1034 | DTGN   | 360.1514        | 388.1463 | DTGNH  | 497.2103 | 525.2052 |
| DTGNHK | 625.3052        | 653.3002 | TG     | 131.0815        | 159.0764 | TGN    | 245.1244 | 273.1193 |

|                      |          |          |                       |          |          |                    |          |          |
|----------------------|----------|----------|-----------------------|----------|----------|--------------------|----------|----------|
| <a href="#">TGNH</a> | 382.1833 | 410.1783 | <a href="#">TGNHK</a> | 510.2783 | 538.2732 | <a href="#">GN</a> | 144.0768 | 172.0717 |
| <a href="#">GNH</a>  | 281.1357 | 309.1306 | <a href="#">GNHK</a>  | 409.2306 | 437.2255 | <a href="#">NH</a> | 224.1142 | 252.1091 |
| <a href="#">NHK</a>  | 352.2092 | 380.2041 | <a href="#">HK</a>    | 238.1662 | 266.1612 |                    |          |          |

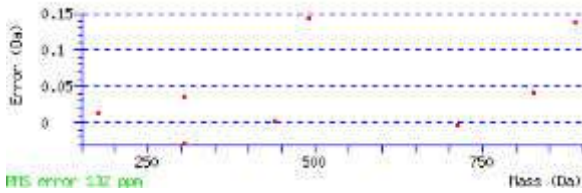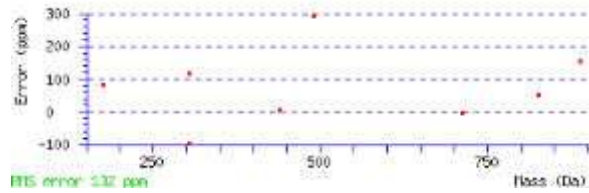

NCBI BLAST search of [LGCIEDTGNHKR](#)

(Parameters: blastp, nr protein database, expect=20000, no filter, PAM30)

Other BLAST [web gateways](#)

#### All matches to this query

| Score | Mr(calc)  | Delta   | Sequence                       |
|-------|-----------|---------|--------------------------------|
| 28.1  | 1398.7078 | 0.0836  | <a href="#">MDVOVPSGPWKR</a>   |
| 25.3  | 1398.6674 | 0.1240  | <a href="#">LGCIEDTGNHKR</a>   |
| 22.3  | 1398.6640 | 0.1274  | <a href="#">LWSDADSGAGHKR</a>  |
| 22.2  | 1398.6537 | 0.1378  | <a href="#">GRPMMDVYFOR</a>    |
| 16.3  | 1398.8194 | -0.0280 | <a href="#">KASALAAVDTLAR</a>  |
| 15.8  | 1398.7467 | 0.0447  | <a href="#">GITEATDPVAAAKR</a> |
| 14.8  | 1398.6852 | 0.1063  | <a href="#">DETQVGVDPRAGR</a>  |
| 14.8  | 1398.8380 | -0.0466 | <a href="#">ITMINNAILLKR</a>   |
| 14.4  | 1398.6852 | 0.1063  | <a href="#">AGTTSAGOLGEHVR</a> |
| 14.2  | 1398.7467 | 0.0447  | <a href="#">SLERSVDLPLR</a>    |

Mascot: <http://www.matrixscience.com/>


**Mascot Search Results**
**Peptide View**      **Spot no 116**
MS/MS Fragmentation of **GVVDSNDLPLNVSR**Found in **gi115477014** in **NCBIInr**, Os08g0487800 [Oryza sativa Japonica Group]

Match to Query 46: 1483.886124 from(1484.893400,1+) intensity(0.0000) index(16)

Title: Label: M6, Spot\_Id: 219766, Peak\_List\_Id: 226005, MSMS Job\_Run\_Id: 21831, Comment:

Data file C:\Documents and Settings\Administrator\Desktop\Farah-Garima 11May 2013\ppw\_M6\_136859901000.txt

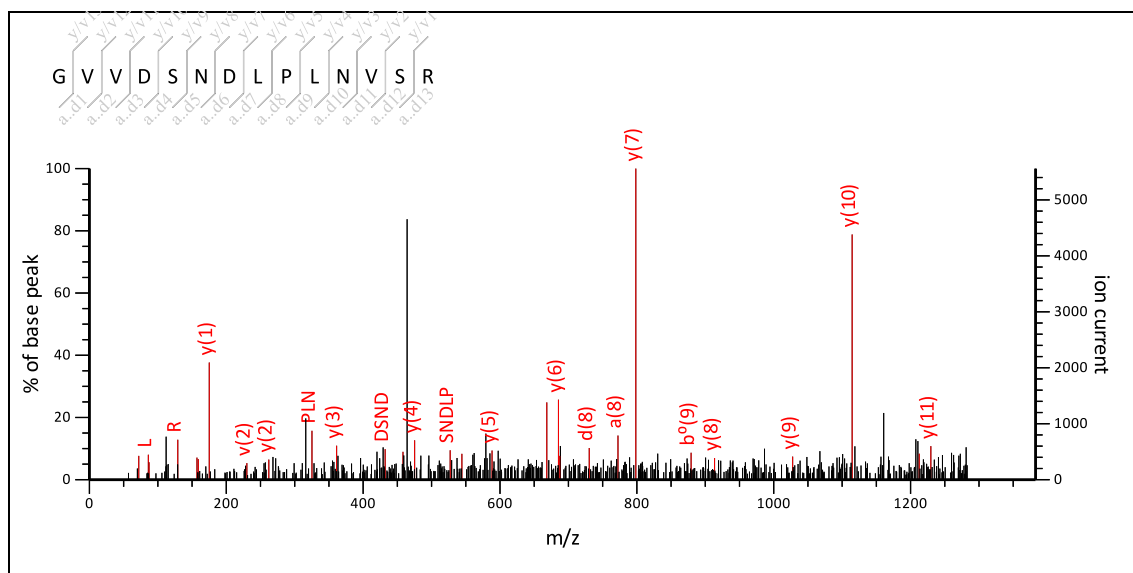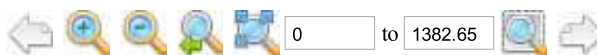Label all possible matches  Label matches used for scoring Monoisotopic mass of neutral peptide **Mr(calc)**: 1483.7631

Fixed modifications: Carbamidomethyl (C) (apply to specified residues or termini only)

Ions Score: 60 Expect: 0.022

Matches : 39/243 fragment ions using 65 most intense peaks ([help](#))

| #  | Immon.   | a         | a*        | a <sup>0</sup> | b         | b*        | b <sup>0</sup> | d         | Seq. | v         | w         | y         | y*        | y <sup>0</sup> | #  |
|----|----------|-----------|-----------|----------------|-----------|-----------|----------------|-----------|------|-----------|-----------|-----------|-----------|----------------|----|
| 1  | 30.0338  | 30.0338   |           |                | 58.0287   |           |                | 44.0495   | G    |           |           |           |           |                | 14 |
| 2  | 72.0808  | 129.1022  |           |                | 157.0972  |           |                | 115.0866  | V    | 1383.6863 | 1396.7067 | 1427.7489 | 1410.7223 | 1409.7383      | 13 |
| 3  | 72.0808  | 228.1707  |           |                | 256.1656  |           |                | 214.1550  | V    | 1284.6179 | 1297.6383 | 1328.6805 | 1311.6539 | 1310.6699      | 12 |
| 4  | 88.0393  | 343.1976  |           | 325.1870       | 371.1925  |           | 353.1819       | 299.2078  | D    | 1169.5909 | 1168.5957 | 1229.6121 | 1212.5855 | 1211.6015      | 11 |
| 5  | 60.0444  | 430.2296  |           | 412.2191       | 458.2245  |           | 440.2140       | 414.2347  | S    | 1082.5589 | 1081.5636 | 1114.5851 | 1097.5586 | 1096.5745      | 10 |
| 6  | 87.0553  | 544.2726  | 527.2460  | 526.2620       | 572.2675  | 555.2409  | 554.2569       | 501.2667  | N    | 968.5160  | 967.5207  | 1027.5531 | 1010.5265 | 1009.5425      | 9  |
| 7  | 88.0393  | 659.2995  | 642.2729  | 641.2889       | 687.2944  | 670.2679  | 669.2838       | 615.3097  | D    | 853.4890  | 852.4938  | 913.5102  | 896.4836  | 895.4996       | 8  |
| 8  | 86.0964  | 772.3836  | 755.3570  | 754.3730       | 800.3785  | 783.3519  | 782.3679       | 730.3366  | L    | 740.4050  | 739.4097  | 798.4832  | 781.4567  | 780.4726       | 7  |
| 9  | 70.0651  | 869.4363  | 852.4098  | 851.4258       | 897.4312  | 880.4047  | 879.4207       | 843.4207  | P    | 643.3522  | 642.3570  | 685.3991  | 668.3726  | 667.3886       | 6  |
| 10 | 86.0964  | 982.5204  | 965.4938  | 964.5098       | 1010.5153 | 993.4888  | 992.5047       | 940.4734  | L    | 530.2681  | 529.2729  | 588.3464  | 571.3198  | 570.3358       | 5  |
| 11 | 87.0553  | 1096.5633 | 1079.5368 | 1078.5527      | 1124.5582 | 1107.5317 | 1106.5477      | 1053.5575 | N    | 416.2252  | 415.2300  | 475.2623  | 458.2358  | 457.2518       | 4  |
| 12 | 72.0808  | 1195.6317 | 1178.6052 | 1177.6212      | 1223.6266 | 1206.6001 | 1205.6161      | 1181.6161 | V    | 317.1568  | 330.1772  | 361.2194  | 344.1928  | 343.2088       | 3  |
| 13 | 60.0444  | 1282.6638 | 1265.6372 | 1264.6532      | 1310.6587 | 1293.6321 | 1292.6481      | 1266.6688 | S    | 230.1248  | 229.1295  | 262.1510  | 245.1244  | 244.1404       | 2  |
| 14 | 129.1135 |           |           |                |           |           |                |           | R    | 74.0237   | 73.0284   | 175.1190  | 158.0924  |                | 1  |

| Seq    | ya       | yb       | Seq    | ya       | yb       | Seq   | ya       | yb       |
|--------|----------|----------|--------|----------|----------|-------|----------|----------|
| VV     | 171.1492 | 199.1441 | VVD    | 286.1761 | 314.1710 | VVDS  | 373.2082 | 401.2031 |
| VVDSN  | 487.2511 | 515.2460 | VVDSND | 602.2780 | 630.2729 | VD    | 187.1077 | 215.1026 |
| VDS    | 274.1397 | 302.1347 | VDSN   | 388.1827 | 416.1776 | VDSND | 503.2096 | 531.2045 |
| VDSNDL | 616.2937 | 644.2886 | DS     | 175.0713 | 203.0662 | DSN   | 289.1143 | 317.1092 |

|               |          |                 |               |          |          |               |                 |                 |
|---------------|----------|-----------------|---------------|----------|----------|---------------|-----------------|-----------------|
| <b>DSND</b>   | 404.1412 | <b>432.1361</b> | <b>DSNDL</b>  | 517.2253 | 545.2202 | <b>DSNDLP</b> | 614.2780        | 642.2729        |
| <b>SN</b>     | 174.0873 | 202.0822        | <b>SNL</b>    | 289.1143 | 317.1092 | <b>SNDL</b>   | 402.1983        | 430.1932        |
| <b>SNDLP</b>  | 499.2511 | <b>527.2460</b> | <b>SNDLPL</b> | 612.3352 | 640.3301 | <b>ND</b>     | 202.0822        | <b>230.0771</b> |
| <b>NDL</b>    | 315.1663 | 343.1612        | <b>NDLP</b>   | 412.2191 | 440.2140 | <b>NDLPL</b>  | 525.3031        | 553.2980        |
| <b>NDLPLN</b> | 639.3461 | 667.3410        | <b>DL</b>     | 201.1234 | 229.1183 | <b>DLP</b>    | 298.1761        | 326.1710        |
| <b>DLPL</b>   | 411.2602 | 439.2551        | <b>DLPLN</b>  | 525.3031 | 553.2980 | <b>DLPLNV</b> | 624.3715        | 652.3665        |
| <b>LP</b>     | 183.1492 | 211.1441        | <b>LPL</b>    | 296.2333 | 324.2282 | <b>LPLN</b>   | 410.2762        | 438.2711        |
| <b>LPLNV</b>  | 509.3446 | 537.3395        | <b>LPLNVS</b> | 596.3766 | 624.3715 | <b>PL</b>     | 183.1492        | 211.1441        |
| <b>PLN</b>    | 297.1921 | <b>325.1870</b> | <b>PLNV</b>   | 396.2605 | 424.2554 | <b>PLNVS</b>  | 483.2926        | 511.2875        |
| <b>LN</b>     | 200.1394 | 228.1343        | <b>LNV</b>    | 299.2078 | 327.2027 | <b>LNVS</b>   | 386.2398        | 414.2347        |
| <b>NV</b>     | 186.1237 | 214.1186        | <b>NVS</b>    | 273.1557 | 301.1506 | <b>VS</b>     | <b>159.1128</b> | 187.1077        |

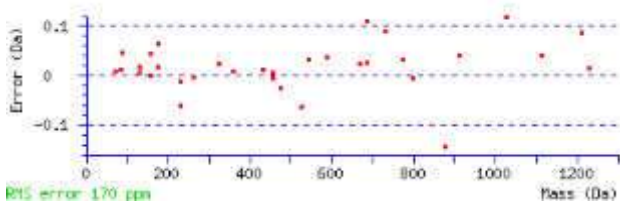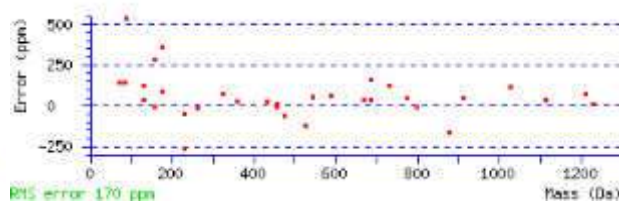

NCBI BLAST search of [GVVDSNDLPLNVSR](#)

(Parameters: blastp, nr protein database, expect=20000, no filter, PAM30)

Other BLAST [web gateways](#)

#### All matches to this query

| Score | Mr(calc)  | Delta  | Sequence                        |
|-------|-----------|--------|---------------------------------|
| 60.3  | 1483.7631 | 0.1230 | <a href="#">GVVDSNDLPLNVSR</a>  |
| 30.3  | 1483.7783 | 0.1078 | <a href="#">VLSAVDQLPHSFR</a>   |
| 27.6  | 1483.7743 | 0.1118 | <a href="#">IADADAAAVRAVADR</a> |
| 26.4  | 1483.7995 | 0.0867 | <a href="#">GLVDTNSLPLNVSR</a>  |
| 23.1  | 1483.7631 | 0.1231 | <a href="#">IADDLGLQPSNVSR</a>  |
| 21.3  | 1483.8107 | 0.0754 | <a href="#">GVISIDQSPIRGSR</a>  |
| 20.0  | 1483.7994 | 0.0867 | <a href="#">DISKENIPINSVR</a>   |
| 19.8  | 1483.8107 | 0.0754 | <a href="#">VDRNEIAVGLGVSR</a>  |
| 19.4  | 1483.8511 | 0.0351 | <a href="#">IAENALTLAKVWR</a>   |
| 19.1  | 1483.8470 | 0.0391 | <a href="#">LAAELNVSLVGRSR</a>  |

Mascot: <http://www.matrixscience.com/>

**MATRIX SCIENCE Mascot Search Results**

**Peptide View Spot no 114**

MS/MS Fragmentation of **ELVSNASDALDKLR**

Found in **gi115477014** in **NCBIInr**, Os08g0487800 [Oryza sativa Japonica Group]

Match to Query 50: 1529.926724 from(1530.934000,1+) intensity(0.0000) index(18)

Title: Label: M6, Spot\_Id: 219766, Peak\_List\_Id: 226013, MSMS Job\_Run\_Id: 21831, Comment:

Data file C:\Documents and Settings\Administrator\Desktop\Farah-Garima 11May 2013\ppw\_M6\_136859901000.txt

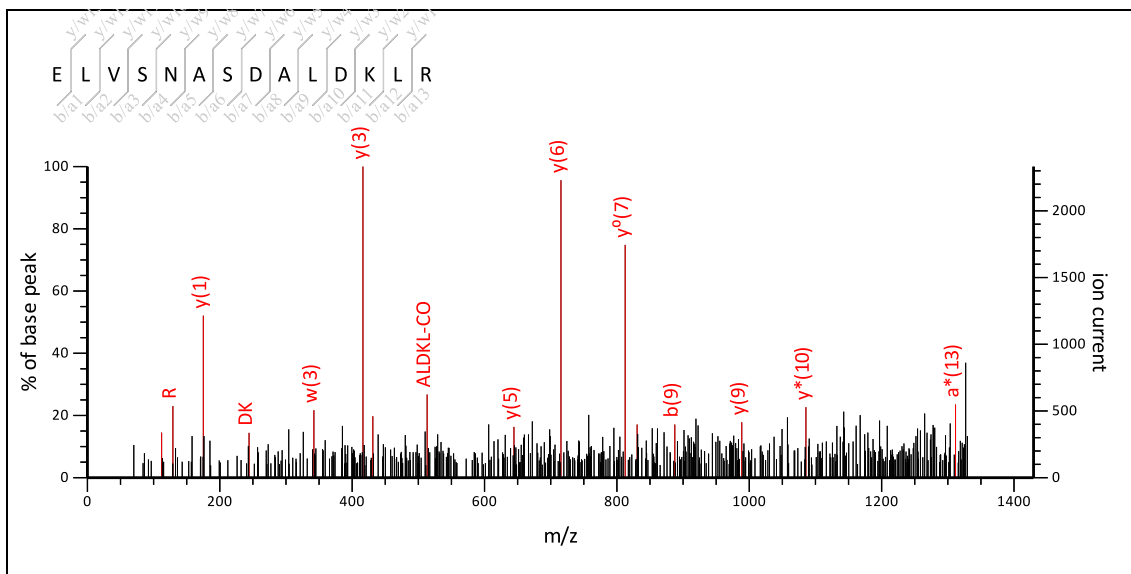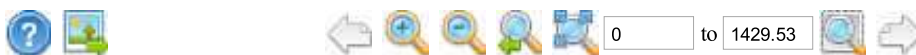

Label all possible matches  Label matches used for scoring

**Monoisotopic mass of neutral peptide Mr(calc):** 1529.8049

**Fixed modifications:** Carbamidomethyl (C) (apply to specified residues or termini only)

**Ions Score:** 30 **Expect:** 21

**Matches:** 20/254 fragment ions using 26 most intense peaks ([help](#))

| #  | Immon.   | a         | a*        | a <sup>0</sup> | b         | b*        | b <sup>0</sup> | d         | Seq. | v         | w         | y         | y*        | y <sup>0</sup> | #  |
|----|----------|-----------|-----------|----------------|-----------|-----------|----------------|-----------|------|-----------|-----------|-----------|-----------|----------------|----|
| 1  | 102.0550 | 102.0550  |           | 84.0444        | 130.0499  |           | 112.0393       | 44.0495   | E    |           |           |           |           |                | 14 |
| 2  | 86.0964  | 215.1390  |           | 197.1285       | 243.1339  |           | 225.1234       | 173.0921  | L    | 1343.6914 | 1342.6961 | 1401.7696 | 1384.7431 | 1383.7591      | 13 |
| 3  | 72.0808  | 314.2074  |           | 296.1969       | 342.2023  |           | 324.1918       | 300.1918  | V    | 1244.6230 | 1257.6434 | 1288.6856 | 1271.6590 | 1270.6750      | 12 |
| 4  | 60.0444  | 401.2395  |           | 383.2289       | 429.2344  |           | 411.2238       | 385.2445  | S    | 1157.5909 | 1156.5957 | 1189.6171 | 1172.5906 | 1171.6066      | 11 |
| 5  | 87.0553  | 515.2824  | 498.2558  | 497.2718       | 543.2773  | 526.2508  | 525.2667       | 472.2766  | N    | 1043.5480 | 1042.5527 | 1102.5851 | 1085.5586 | 1084.5745      | 10 |
| 6  | 44.0495  | 586.3195  | 569.2930  | 568.3089       | 614.3144  | 597.2879  | 596.3039       |           | A    | 972.5109  |           | 988.5422  | 971.5156  | 970.5316       | 9  |
| 7  | 60.0444  | 673.3515  | 656.3250  | 655.3410       | 701.3464  | 684.3199  | 683.3359       | 657.3566  | S    | 885.4789  | 884.4836  | 917.5051  | 900.4785  | 899.4945       | 8  |
| 8  | 88.0393  | 788.3785  | 771.3519  | 770.3679       | 816.3734  | 799.3468  | 798.3628       | 744.3886  | D    | 770.4519  | 769.4567  | 830.4730  | 813.4465  | 812.4625       | 7  |
| 9  | 44.0495  | 859.4156  | 842.3890  | 841.4050       | 887.4105  | 870.3840  | 869.3999       |           | A    | 699.4148  |           | 715.4461  | 698.4196  | 697.4355       | 6  |
| 10 | 86.0964  | 972.4996  | 955.4731  | 954.4891       | 1000.4946 | 983.4680  | 982.4840       | 930.4527  | L    | 586.3307  | 585.3355  | 644.4090  | 627.3824  | 626.3984       | 5  |
| 11 | 88.0393  | 1087.5266 | 1070.5000 | 1069.5160      | 1115.5215 | 1098.4950 | 1097.5109      | 1043.5368 | D    | 471.3038  | 470.3085  | 531.3249  | 514.2984  | 513.3144       | 4  |
| 12 | 101.1073 | 1215.6216 | 1198.5950 | 1197.6110      | 1243.6165 | 1226.5899 | 1225.6059      | 1158.5637 | K    | 343.2088  | 342.2136  | 416.2980  | 399.2714  |                | 3  |
| 13 | 86.0964  | 1328.7056 | 1311.6791 | 1310.6951      | 1356.7005 | 1339.6740 | 1338.6900      | 1286.6587 | L    | 230.1248  | 229.1295  | 288.2030  | 271.1765  |                | 2  |
| 14 | 129.1135 |           |           |                |           |           |                |           | R    | 74.0237   | 73.0284   | 175.1190  | 158.0924  |                | 1  |

| Seq   | ya       | yb       | Seq    | ya       | yb       | Seq     | ya       | yb       |
|-------|----------|----------|--------|----------|----------|---------|----------|----------|
| LV    | 185.1648 | 213.1598 | LVS    | 272.1969 | 300.1918 | LVSN    | 386.2398 | 414.2347 |
| LVSNA | 457.2769 | 485.2718 | LVSNAS | 544.3089 | 572.3039 | LVSNASD | 659.3359 | 687.3308 |
| VS    | 159.1128 | 187.1077 | VSN    | 273.1557 | 301.1506 | VSNA    | 344.1928 | 372.1878 |
| VSNAS | 431.2249 | 459.2198 | VSNASD | 546.2518 | 574.2467 | VSNASDA | 617.2889 | 645.2838 |



|        |          |          |        |          |          |         |          |          |
|--------|----------|----------|--------|----------|----------|---------|----------|----------|
| SN     | 174.0873 | 202.0822 | SNA    | 245.1244 | 273.1193 | SNAS    | 332.1565 | 360.1514 |
| SNASD  | 447.1834 | 475.1783 | SNASDA | 518.2205 | 546.2154 | SNASDAL | 631.3046 | 659.2995 |
| NA     | 158.0924 | 186.0873 | NAS    | 245.1244 | 273.1193 | NASD    | 360.1514 | 388.1463 |
| NASDA  | 431.1885 | 459.1834 | NASDAL | 544.2726 | 572.2675 | NASDALD | 659.2995 | 687.2944 |
| AS     | 131.0815 | 159.0764 | ASD    | 246.1084 | 274.1034 | ASDA    | 317.1456 | 345.1405 |
| ASDAL  | 430.2296 | 458.2245 | ASDALD | 545.2566 | 573.2515 | ASDALDK | 673.3515 | 701.3464 |
| SD     | 175.0713 | 203.0662 | SDA    | 246.1084 | 274.1034 | SDAL    | 359.1925 | 387.1874 |
| SDALD  | 474.2195 | 502.2144 | SDALDK | 602.3144 | 630.3093 | DA      | 159.0764 | 187.0713 |
| DAL    | 272.1605 | 300.1554 | DALD   | 387.1874 | 415.1823 | DALDK   | 515.2824 | 543.2773 |
| DALDKL | 628.3665 | 656.3614 | AL     | 157.1335 | 185.1285 | ALD     | 272.1605 | 300.1554 |
| ALDK   | 400.2554 | 428.2504 | ALDKL  | 513.3395 | 541.3344 | LD      | 201.1234 | 229.1183 |
| LDK    | 329.2183 | 357.2132 | LDKL   | 442.3024 | 470.2973 | DK      | 216.1343 | 244.1292 |
| DKL    | 329.2183 | 357.2132 | KL     | 214.1914 | 242.1863 |         |          |          |

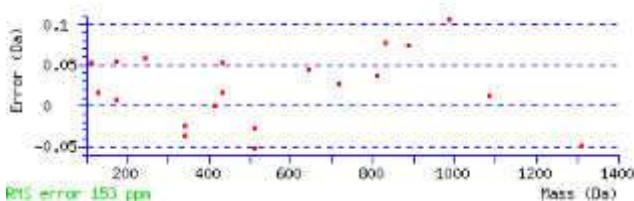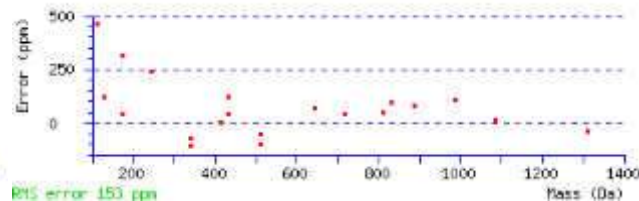

NCBI BLAST search of [ELVSNASDALDKLR](#)

(Parameters: blastp, nr protein database, expect=20000, no filter, PAM30)

Other BLAST [web gateways](#)

#### All matches to this query

| Score | Mr(calc)  | Delta  | Sequence                       |
|-------|-----------|--------|--------------------------------|
| 31.2  | 1529.8413 | 0.0854 | <a href="#">TTLODIADRVGITK</a> |
| 29.9  | 1529.8049 | 0.1218 | <a href="#">EIVSNASDALDKIR</a> |
| 29.9  | 1529.8049 | 0.1218 | <a href="#">ELVSNASDAIDKLR</a> |
| 29.9  | 1529.8049 | 0.1218 | <a href="#">ELVSNASDALDKIR</a> |
| 29.9  | 1529.8049 | 0.1218 | <a href="#">ELVSNASDALDKLR</a> |
| 29.9  | 1529.8049 | 0.1218 | <a href="#">EIVSNASDALDKIR</a> |
| 29.9  | 1529.8049 | 0.1218 | <a href="#">EIVSNSADALDKIR</a> |
| 26.4  | 1529.7872 | 0.1396 | <a href="#">QDRLMAPGESLSVK</a> |
| 25.8  | 1529.8202 | 0.1065 | <a href="#">FLOGPGTDKDALLR</a> |
| 25.7  | 1529.8348 | 0.0919 | <a href="#">MLSAARLDGTVQIR</a> |

Mascot: <http://www.matrixscience.com/>

**MATRIX SCIENCE Mascot Search Results**

**Peptide View Spot no 114**

**MS/MS Fragmentation of RIFEINPDHPIVK**

Found in **gi|115477014** in **NCBI nr**, Os08g0487800 [Oryza sativa Japonica Group]

Match to Query 58: 1577.003924 from(1578.011200,1+) intensity(0.0000) index(21)

Title: Label: M6, Spot\_Id: 219766, Peak\_List\_Id: 226006, MSMS Job\_Run\_Id: 21831, Comment:

Data file C:\Documents and Settings\Administrator\Desktop\Farah-Garima 11May 2013\ppw\_M6\_136859901000.txt

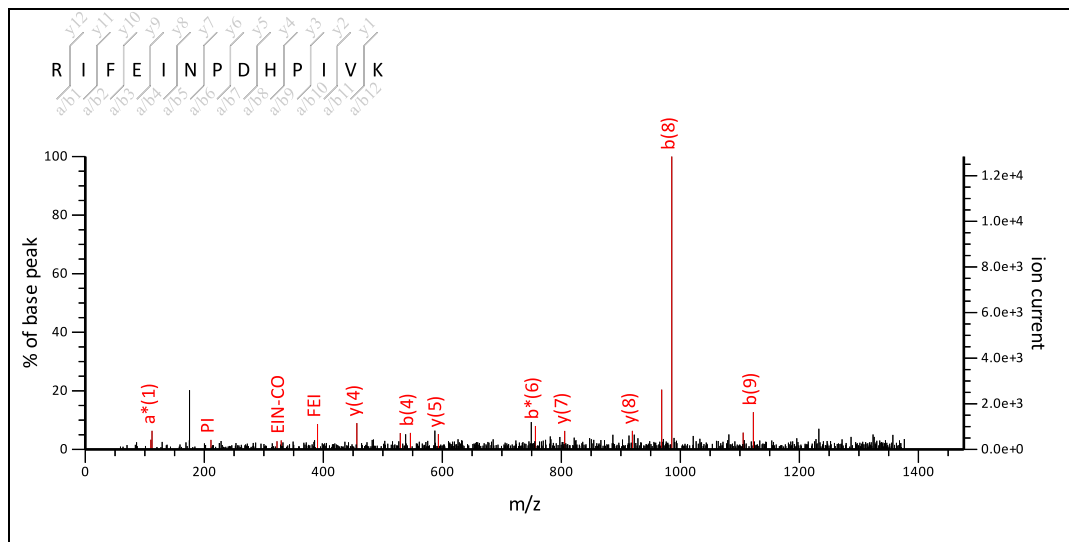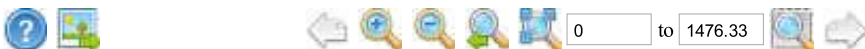

Label all possible matches  Label matches used for scoring

Monoisotopic mass of neutral peptide Mr(calc): 1576.8725

Fixed modifications: Carbamidomethyl (C) (apply to specified residues or termini only)

Ions Score: 15 Expect: 2.2e+02

Matches : 19/225 fragment ions using 28 most intense peaks [\(help\)](#)

| #  | Immon.   | a         | a*        | a <sup>0</sup> | b         | b*        | b <sup>0</sup> | d         | d'        | Seq. | v         | w         | w'        | y         | y*        |
|----|----------|-----------|-----------|----------------|-----------|-----------|----------------|-----------|-----------|------|-----------|-----------|-----------|-----------|-----------|
| 1  | 129.1135 | 129.1135  | 112.0869  |                | 157.1084  | 140.0818  |                | 44.0495   |           | R    |           |           |           |           |           |
| 2  | 86.0964  | 242.1975  | 225.1710  |                | 270.1925  | 253.1659  |                | 214.1662  | 228.1819  | I    | 1363.7005 | 1376.7209 | 1390.7365 | 1421.7787 | 1404.7522 |
| 3  | 120.0808 | 389.2660  | 372.2394  |                | 417.2609  | 400.2343  |                |           |           | F    | 1216.6321 |           |           | 1308.6947 | 1291.6681 |
| 4  | 102.0550 | 518.3085  | 501.2820  | 500.2980       | 546.3035  | 529.2769  | 528.2929       | 460.3031  |           | E    | 1087.5895 | 1086.5942 |           | 1161.6262 | 1144.5997 |
| 5  | 86.0964  | 631.3926  | 614.3661  | 613.3820       | 659.3875  | 642.3610  | 641.3770       | 603.3613  | 617.3770  | I    | 974.5054  | 987.5258  | 1001.5415 | 1032.5837 | 1015.5571 |
| 6  | 87.0553  | 745.4355  | 728.4090  | 727.4250       | 773.4304  | 756.4039  | 755.4199       | 702.4297  |           | N    | 860.4625  | 859.4672  |           | 919.4996  | 902.4730  |
| 7  | 70.0651  | 842.4883  | 825.4617  | 824.4777       | 870.4832  | 853.4567  | 852.4726       | 816.4726  |           | P    | 763.4097  | 762.4145  |           | 805.4567  | 788.4301  |
| 8  | 88.0393  | 957.5152  | 940.4887  | 939.5047       | 985.5102  | 968.4836  | 967.4996       | 913.5254  |           | D    | 648.3828  | 647.3875  |           | 708.4039  | 691.3774  |
| 9  | 110.0713 | 1094.5742 | 1077.5476 | 1076.5636      | 1122.5691 | 1105.5425 | 1104.5585      |           |           | H    | 511.3239  |           |           | 593.3770  | 576.3504  |
| 10 | 70.0651  | 1191.6269 | 1174.6004 | 1173.6164      | 1219.6218 | 1202.5953 | 1201.6113      | 1165.6113 |           | P    | 414.2711  | 413.2758  |           | 456.3180  | 439.2915  |
| 11 | 86.0964  | 1304.7110 | 1287.6844 | 1286.7004      | 1332.7059 | 1315.6793 | 1314.6953      | 1276.6797 | 1290.6953 | I    | 301.1870  | 314.2074  | 328.2231  | 359.2653  | 342.2387  |
| 12 | 72.0808  | 1403.7794 | 1386.7528 | 1385.7688      | 1431.7743 | 1414.7478 | 1413.7637      | 1389.7637 |           | V    | 202.1186  | 215.1390  |           | 246.1812  | 229.1547  |
| 13 | 101.1073 |           |           |                |           |           |                |           |           | K    | 74.0237   | 73.0284   |           | 147.1128  | 130.0863  |

| Seq    | ya       | yb       | Seq    | ya       | yb       | Seq    | ya       | yb       |
|--------|----------|----------|--------|----------|----------|--------|----------|----------|
| IF     | 233.1648 | 261.1598 | IFEI   | 362.2074 | 390.2023 | IFEI   | 475.2915 | 503.2864 |
| IFEIN  | 589.3344 | 617.3293 | IFEINP | 686.3872 | 714.3821 | FEI    | 249.1234 | 277.1183 |
| FEI    | 362.2074 | 390.2023 | FEIN   | 476.2504 | 504.2453 | FEINP  | 573.3031 | 601.2980 |
| FEINPD | 688.3301 | 716.3250 | EI     | 215.1390 | 243.1339 | EIN    | 329.1819 | 357.1769 |
| EINP   | 426.2347 | 454.2296 | EINPD  | 541.2617 | 569.2566 | EINPDH | 678.3206 | 706.3155 |
| IN     | 200.1394 | 228.1343 | INP    | 297.1921 | 325.1870 | INPD   | 412.2191 | 440.2140 |
| INPDH  | 549.2780 | 577.2729 | INPDHP | 646.3307 | 674.3256 | NP     | 184.1081 | 212.1030 |
| NPD    | 299.1350 | 327.1299 | NPDH   | 436.1939 | 464.1888 | NPDHP  | 533.2467 | 561.2416 |

|               |          |          |              |                 |                 |               |                 |          |
|---------------|----------|----------|--------------|-----------------|-----------------|---------------|-----------------|----------|
| <b>NPDHPI</b> | 646.3307 | 674.3256 | <b>PD</b>    | 185.0921        | 213.0870        | <b>PDH</b>    | <b>322.1510</b> | 350.1459 |
| <b>PDHP</b>   | 419.2037 | 447.1987 | <b>PDHPI</b> | 532.2878        | 560.2827        | <b>PDHPIV</b> | 631.3562        | 659.3511 |
| <b>DH</b>     | 225.0982 | 253.0931 | <b>DHP</b>   | <b>322.1510</b> | 350.1459        | <b>DHPI</b>   | 435.2350        | 463.2300 |
| <b>DHPIV</b>  | 534.3035 | 562.2984 | <b>HP</b>    | 207.1240        | 235.1190        | <b>HPI</b>    | 320.2081        | 348.2030 |
| <b>HPIV</b>   | 419.2765 | 447.2714 | <b>PI</b>    | 183.1492        | <b>211.1441</b> | <b>PIV</b>    | 282.2176        | 310.2125 |
| <b>IV</b>     | 185.1648 | 213.1598 |              |                 |                 |               |                 |          |

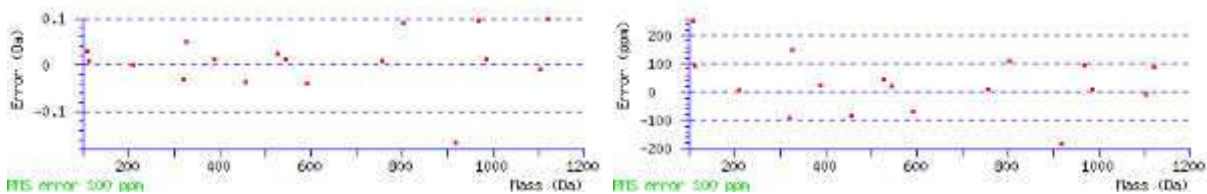

NCBI **BLAST** search of [RIFEINPDHPIVK](#)

(Parameters: blastp, nr protein database, expect=20000, no filter, PAM30)

Other BLAST [web gateways](#)

#### All matches to this query

| Score | Mr(calc)  | Delta  | Sequence                       |
|-------|-----------|--------|--------------------------------|
| 17.1  | 1576.8838 | 0.1202 | <a href="#">KNVNHIVWADLIR</a>  |
| 15.3  | 1576.9049 | 0.0990 | <a href="#">VERAHALLTDLAR</a>  |
| 15.3  | 1576.8725 | 0.1314 | <a href="#">RIFEINPDHPIVK</a>  |
| 14.8  | 1576.9566 | 0.0474 | <a href="#">LPIIRVLFQIHR</a>   |
| 13.5  | 1576.8508 | 0.1532 | <a href="#">MRPAHAVIDLDALR</a> |
| 12.0  | 1576.8725 | 0.1314 | <a href="#">LPTALAALAYRDFR</a> |
| 11.7  | 1576.8759 | 0.1280 | <a href="#">MAKILVDDHPAIR</a>  |
| 11.5  | 1576.8685 | 0.1354 | <a href="#">REPPIVEVERPTR</a>  |
| 11.5  | 1576.8573 | 0.1466 | <a href="#">QPLHTVIADVVELR</a> |
| 11.4  | 1576.9300 | 0.0739 | <a href="#">IKSSIEITHIAPR</a>  |

Mascot: <http://www.matrixscience.com/>


**Mascot Search Results**
**Peptide View**      **Spot no 114**
MS/MS Fragmentation of **VFISDDFDGELFPR**Found in **gi115477014** in **NCBIInr**, Os08g0487800 [Oryza sativa Japonica Group]

Match to Query 62: 1655.925424 from(1656.932700,1+) intensity(0.0000) index(22)

Title: Label: M6, Spot\_Id: 219766, Peak\_List\_Id: 226001, MSMS Job\_Run\_Id: 21831, Comment:

Data file C:\Documents and Settings\Administrator\Desktop\Farah-Garima 11May 2013\ppw\_M6\_136859901000.txt

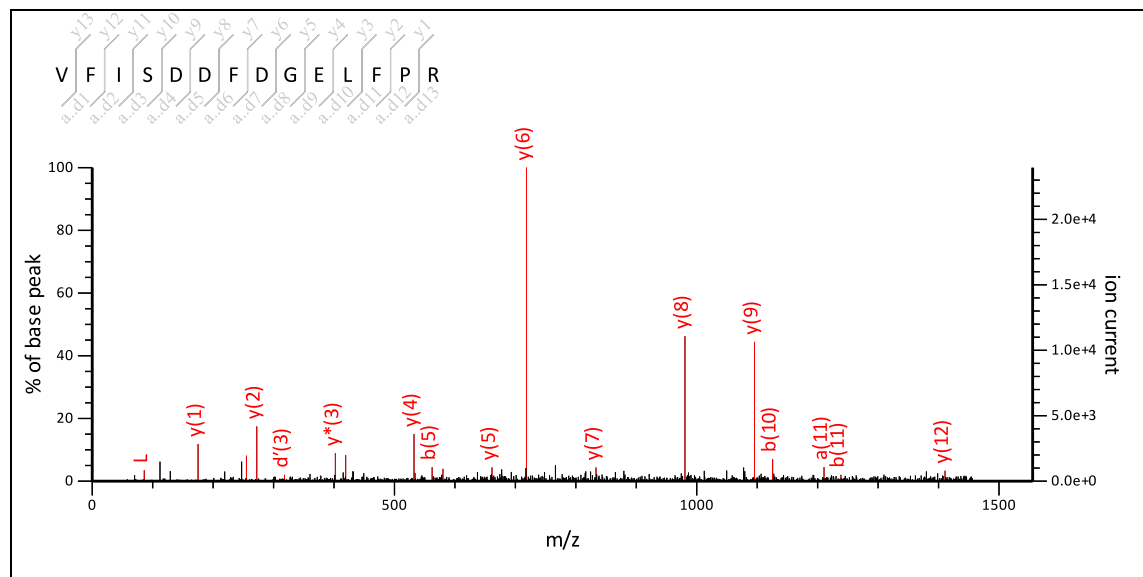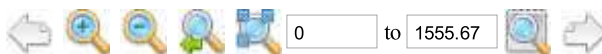Label all possible matches  Label matches used for scoring Monoisotopic mass of neutral peptide **Mr(calc)**: 1655.7832**Fixed modifications**: Carbamidomethyl (C) (apply to specified residues or termini only)**Ions Score**: 94 **Expect**: 1.3e-05**Matches**: 31/215 fragment ions using 28 most intense peaks ([help](#))

| #  | Immon.   | a         | a <sup>0</sup> | b         | b <sup>0</sup> | d         | d <sup>t</sup> | Seq. | v         | w         | w <sup>t</sup> | y         | y <sup>*</sup> | y <sup>0</sup> | #  |
|----|----------|-----------|----------------|-----------|----------------|-----------|----------------|------|-----------|-----------|----------------|-----------|----------------|----------------|----|
| 1  | 72.0808  | 72.0808   |                | 100.0757  |                | 44.0495   |                | V    |           |           |                |           |                |                | 14 |
| 2  | 120.0808 | 219.1492  |                | 247.1441  |                |           |                | F    | 1465.6594 |           |                | 1557.7220 | 1540.6955      | 1539.7114      | 13 |
| 3  | 86.0964  | 332.2333  |                | 360.2282  |                | 304.2020  | 318.2176       | I    | 1352.5753 | 1365.5957 | 1379.6114      | 1410.6536 | 1393.6270      | 1392.6430      | 12 |
| 4  | 60.0444  | 419.2653  | 401.2547       | 447.2602  | 429.2496       | 403.2704  |                | S    | 1265.5433 | 1264.5481 |                | 1297.5695 | 1280.5430      | 1279.5590      | 11 |
| 5  | 88.0393  | 534.2922  | 516.2817       | 562.2871  | 544.2766       | 490.3024  |                | D    | 1150.5164 | 1149.5211 |                | 1210.5375 | 1193.5109      | 1192.5269      | 10 |
| 6  | 88.0393  | 649.3192  | 631.3086       | 677.3141  | 659.3035       | 605.3293  |                | D    | 1035.4894 | 1034.4942 |                | 1095.5106 | 1078.4840      | 1077.5000      | 9  |
| 7  | 120.0808 | 796.3876  | 778.3770       | 824.3825  | 806.3719       |           |                | F    | 888.4210  |           |                | 980.4836  | 963.4571       | 962.4730       | 8  |
| 8  | 88.0393  | 911.4145  | 893.4040       | 939.4094  | 921.3989       | 867.4247  |                | D    | 773.3941  | 772.3988  |                | 833.4152  | 816.3886       | 815.4046       | 7  |
| 9  | 30.0338  | 968.4360  | 950.4254       | 996.4309  | 978.4203       |           |                | G    |           |           |                | 718.3883  | 701.3617       | 700.3777       | 6  |
| 10 | 102.0550 | 1097.4786 | 1079.4680      | 1125.4735 | 1107.4629      | 1039.4731 |                | E    | 587.3300  | 586.3348  |                | 661.3668  | 644.3402       | 643.3562       | 5  |
| 11 | 86.0964  | 1210.5626 | 1192.5521      | 1238.5576 | 1220.5470      | 1168.5157 |                | L    | 474.2459  | 473.2507  |                | 532.3242  | 515.2976       |                | 4  |
| 12 | 120.0808 | 1357.6311 | 1339.6205      | 1385.6260 | 1367.6154      |           |                | F    | 327.1775  |           |                | 419.2401  | 402.2136       |                | 3  |
| 13 | 70.0651  | 1454.6838 | 1436.6733      | 1482.6787 | 1464.6682      | 1428.6682 |                | P    | 230.1248  | 229.1295  |                | 272.1717  | 255.1452       |                | 2  |
| 14 | 129.1135 |           |                |           |                |           |                | R    | 74.0237   | 73.0284   |                | 175.1190  | 158.0924       |                | 1  |

| Seq   | ya       | yb       | Seq    | ya       | yb       | Seq   | ya       | yb       |
|-------|----------|----------|--------|----------|----------|-------|----------|----------|
| FI    | 233.1648 | 261.1598 | FIS    | 320.1969 | 348.1918 | FISD  | 435.2238 | 463.2187 |
| FISDD | 550.2508 | 578.2457 | FISDDF | 697.3192 | 725.3141 | IS    | 173.1285 | 201.1234 |
| ISD   | 288.1554 | 316.1503 | ISDD   | 403.1823 | 431.1773 | ISDDF | 550.2508 | 578.2457 |

|               |          |          |               |          |          |               |          |          |
|---------------|----------|----------|---------------|----------|----------|---------------|----------|----------|
| <b>ISDDFD</b> | 665.2777 | 693.2726 | <b>SD</b>     | 175.0713 | 203.0662 | <b>SDD</b>    | 290.0983 | 318.0932 |
| <b>SDDF</b>   | 437.1667 | 465.1616 | <b>SDDFD</b>  | 552.1936 | 580.1885 | <b>SDDFDG</b> | 609.2151 | 637.2100 |
| <b>DD</b>     | 203.0662 | 231.0612 | <b>DDF</b>    | 350.1347 | 378.1296 | <b>DDFD</b>   | 465.1616 | 493.1565 |
| <b>DDFDG</b>  | 522.1831 | 550.1780 | <b>DDFDGE</b> | 651.2257 | 679.2206 | <b>DF</b>     | 235.1077 | 263.1026 |
| <b>DFD</b>    | 350.1347 | 378.1296 | <b>DFDG</b>   | 407.1561 | 435.1510 | <b>DFDGE</b>  | 536.1987 | 564.1936 |
| <b>DFDGEL</b> | 649.2828 | 677.2777 | <b>FD</b>     | 235.1077 | 263.1026 | <b>FDG</b>    | 292.1292 | 320.1241 |
| <b>FDGE</b>   | 421.1718 | 449.1667 | <b>FDGEL</b>  | 534.2558 | 562.2508 | <b>FDGELF</b> | 681.3243 | 709.3192 |
| <b>DG</b>     | 145.0608 | 173.0557 | <b>DGE</b>    | 274.1034 | 302.0983 | <b>DGEL</b>   | 387.1874 | 415.1823 |
| <b>DGELF</b>  | 534.2558 | 562.2508 | <b>DGELFP</b> | 631.3086 | 659.3035 | <b>GE</b>     | 159.0764 | 187.0713 |
| <b>GEL</b>    | 272.1605 | 300.1554 | <b>GELF</b>   | 419.2289 | 447.2238 | <b>GELFP</b>  | 516.2817 | 544.2766 |
| <b>EL</b>     | 215.1390 | 243.1339 | <b>ELF</b>    | 362.2074 | 390.2023 | <b>ELFP</b>   | 459.2602 | 487.2551 |
| <b>LF</b>     | 233.1648 | 261.1598 | <b>LFP</b>    | 330.2176 | 358.2125 | <b>FP</b>     | 217.1335 | 245.1285 |

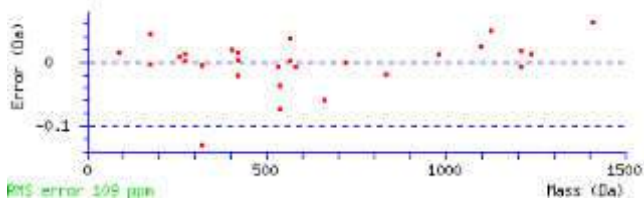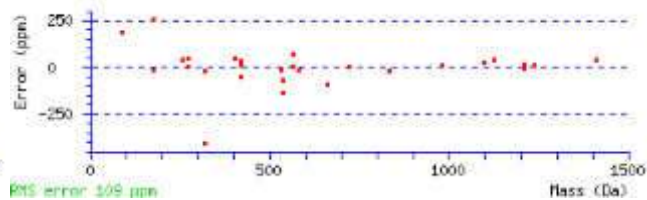

NCBI BLAST search of [VFISDDFDGELFPR](#)

(Parameters: blastp, nr protein database, expect=20000, no filter, PAM30)

Other BLAST [web gateways](#)

#### All matches to this query

| Score | Mr(calc)  | Delta  | Sequence                        |
|-------|-----------|--------|---------------------------------|
| 93.9  | 1655.7832 | 0.1423 | <a href="#">VFISDDFDGELFPR</a>  |
| 33.9  | 1655.8757 | 0.0497 | <a href="#">QALHARTLGFHHPR</a>  |
| 33.9  | 1655.8757 | 0.0497 | <a href="#">QALHARTLGFHHPR</a>  |
| 27.6  | 1655.7791 | 0.1463 | <a href="#">FDIREYDSVLDER</a>   |
| 27.6  | 1655.8076 | 0.1178 | <a href="#">EVPPEIETDDMIR</a>   |
| 26.4  | 1655.8606 | 0.0648 | <a href="#">NCALFVFRDLFVR</a>   |
| 23.9  | 1655.8155 | 0.1099 | <a href="#">VFTVDNSSLTLPSPR</a> |
| 22.5  | 1655.8883 | 0.0371 | <a href="#">IPIHTFGITDSNTLK</a> |
| 22.5  | 1655.8406 | 0.0848 | <a href="#">LDAILGYFTEDKSGK</a> |
| 21.4  | 1655.8065 | 0.1190 | <a href="#">DRFLFWMQNIMR</a>    |

Mascot: <http://www.matrixscience.com/>


**Mascot Search Results**
**Peptide View**      **Spot no 114**
MS/MS Fragmentation of **RVFISDDDFDGE LFP R**Found in **gi|115477014** in **NCBI nr**, Os08g0487800 [Oryza sativa Japonica Group]

Match to Query 71: 1812.035424 from(1813.042700,1+) intensity(0.0000) index(26)

Title: Label: M6, Spot\_Id: 219766, Peak\_List\_Id: 226011, MSMS Job\_Run\_Id: 21831, Comment:

Data file C:\Documents and Settings\Administrator\Desktop\Farah-Garima 11May 2013\ppw\_M6\_136859901000.txt

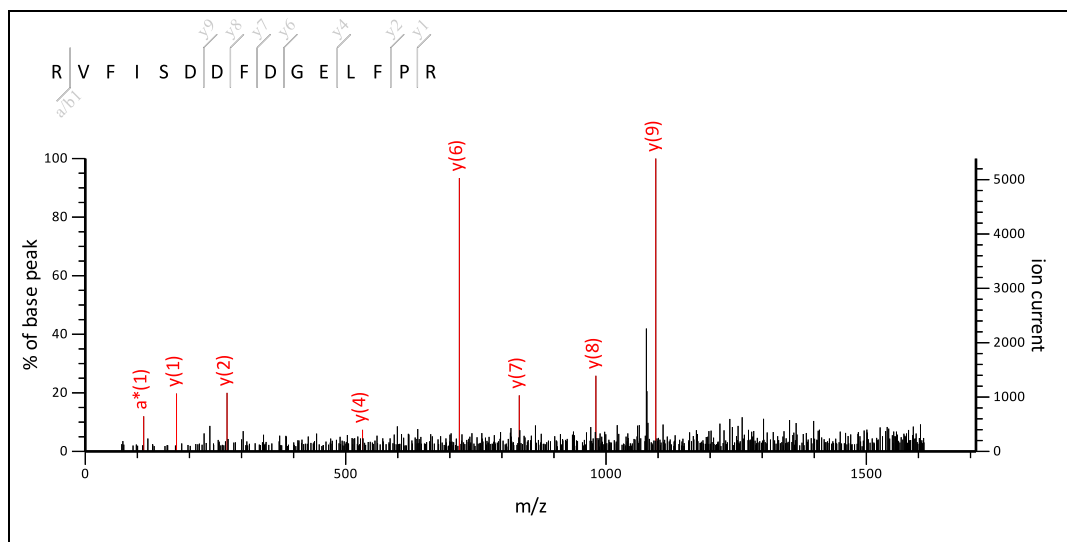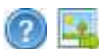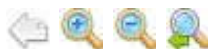

0 to 1710.5

Label all possible matches  Label matches used for scoring 

Monoisotopic mass of neutral peptide Mr(calc): 1811.8843

Fixed modifications: Carbamidomethyl (C) (apply to specified residues or termini only)

Ions Score: 34 Expect: 10

Matches : 14/262 fragment ions using 16 most intense peaks ([help](#))

| #  | Immon.   | a         | a*        | a <sup>0</sup> | b         | b*        | b <sup>0</sup> | d         | d'       | Seq. | v         | w         | w'        | y         | y*        |
|----|----------|-----------|-----------|----------------|-----------|-----------|----------------|-----------|----------|------|-----------|-----------|-----------|-----------|-----------|
| 1  | 129.1135 | 129.1135  | 112.0869  |                | 157.1084  | 140.0818  |                | 44.0495   |          | R    |           |           |           |           |           |
| 2  | 72.0808  | 228.1819  | 211.1553  |                | 256.1768  | 239.1503  |                | 214.1662  |          | V    | 1612.7278 | 1625.7482 |           | 1656.7904 | 1639.7639 |
| 3  | 120.0808 | 375.2503  | 358.2238  |                | 403.2452  | 386.2187  |                |           |          | F    | 1465.6594 |           |           | 1557.7220 | 1540.6955 |
| 4  | 86.0964  | 488.3344  | 471.3078  |                | 516.3293  | 499.3027  |                | 460.3031  | 474.3187 | I    | 1352.5753 | 1365.5957 | 1379.6114 | 1410.6536 | 1393.6270 |
| 5  | 60.0444  | 575.3664  | 558.3398  | 557.3558       | 603.3613  | 586.3348  | 585.3507       | 559.3715  |          | S    | 1265.5433 | 1264.5481 |           | 1297.5695 | 1280.5430 |
| 6  | 88.0393  | 690.3933  | 673.3668  | 672.3828       | 718.3882  | 701.3617  | 700.3777       | 646.4035  |          | D    | 1150.5164 | 1149.5211 |           | 1210.5375 | 1193.5109 |
| 7  | 88.0393  | 805.4203  | 788.3937  | 787.4097       | 833.4152  | 816.3886  | 815.4046       | 761.4304  |          | D    | 1035.4894 | 1034.4942 |           | 1095.5106 | 1078.4840 |
| 8  | 120.0808 | 952.4887  | 935.4621  | 934.4781       | 980.4836  | 963.4571  | 962.4730       |           |          | F    | 888.4210  |           |           | 980.4836  | 963.4571  |
| 9  | 88.0393  | 1067.5156 | 1050.4891 | 1049.5051      | 1095.5105 | 1078.4840 | 1077.5000      | 1023.5258 |          | D    | 773.3941  | 772.3988  |           | 833.4152  | 816.3886  |
| 10 | 30.0338  | 1124.5371 | 1107.5105 | 1106.5265      | 1152.5320 | 1135.5055 | 1134.5214      |           |          | G    |           |           |           | 718.3883  | 701.3617  |
| 11 | 102.0550 | 1253.5797 | 1236.5531 | 1235.5691      | 1281.5746 | 1264.5481 | 1263.5640      | 1195.5742 |          | E    | 587.3300  | 586.3348  |           | 661.3668  | 644.3402  |
| 12 | 86.0964  | 1366.6638 | 1349.6372 | 1348.6532      | 1394.6587 | 1377.6321 | 1376.6481      | 1324.6168 |          | L    | 474.2459  | 473.2507  |           | 532.3242  | 515.2976  |
| 13 | 120.0808 | 1513.7322 | 1496.7056 | 1495.7216      | 1541.7271 | 1524.7005 | 1523.7165      |           |          | F    | 327.1775  |           |           | 419.2401  | 402.2136  |
| 14 | 70.0651  | 1610.7849 | 1593.7584 | 1592.7744      | 1638.7798 | 1621.7533 | 1620.7693      | 1584.7693 |          | P    | 230.1248  | 229.1295  |           | 272.1717  | 255.1452  |
| 15 | 129.1135 |           |           |                |           |           |                |           |          | R    | 74.0237   | 73.0284   |           | 175.1190  | 158.0924  |

| Seq    | ya       | yb       | Seq    | ya       | yb       | Seq    | ya       | yb       |
|--------|----------|----------|--------|----------|----------|--------|----------|----------|
| VF     | 219.1492 | 247.1441 | VFI    | 332.2333 | 360.2282 | VFIS   | 419.2653 | 447.2602 |
| VFISD  | 534.2922 | 562.2871 | VFISDD | 649.3192 | 677.3141 | FI     | 233.1648 | 261.1598 |
| FIS    | 320.1969 | 348.1918 | FISD   | 435.2238 | 463.2187 | FISDD  | 550.2508 | 578.2457 |
| FISDDF | 697.3192 | 725.3141 | IS     | 173.1285 | 201.1234 | ISD    | 288.1554 | 316.1503 |
| ISDD   | 403.1823 | 431.1773 | ISDDF  | 550.2508 | 578.2457 | ISDDFD | 665.2777 | 693.2726 |
| SD     | 175.0713 | 203.0662 | SDD    | 290.0983 | 318.0932 | SDDF   | 437.1667 | 465.1616 |

|                        |          |          |                        |          |          |                        |          |          |
|------------------------|----------|----------|------------------------|----------|----------|------------------------|----------|----------|
| <a href="#">SDDFD</a>  | 552.1936 | 580.1885 | <a href="#">SDDFDG</a> | 609.2151 | 637.2100 | <a href="#">DD</a>     | 203.0662 | 231.0612 |
| <a href="#">DDF</a>    | 350.1347 | 378.1296 | <a href="#">DDFD</a>   | 465.1616 | 493.1565 | <a href="#">DDFDG</a>  | 522.1831 | 550.1780 |
| <a href="#">DDFDGE</a> | 651.2257 | 679.2206 | <a href="#">DF</a>     | 235.1077 | 263.1026 | <a href="#">DFD</a>    | 350.1347 | 378.1296 |
| <a href="#">DFDG</a>   | 407.1561 | 435.1510 | <a href="#">DFDGE</a>  | 536.1987 | 564.1936 | <a href="#">DFDGEL</a> | 649.2828 | 677.2777 |
| <a href="#">FD</a>     | 235.1077 | 263.1026 | <a href="#">FDG</a>    | 292.1292 | 320.1241 | <a href="#">FDGE</a>   | 421.1718 | 449.1667 |
| <a href="#">FDGEL</a>  | 534.2558 | 562.2508 | <a href="#">FDGELF</a> | 681.3243 | 709.3192 | <a href="#">DG</a>     | 145.0608 | 173.0557 |
| <a href="#">DGE</a>    | 274.1034 | 302.0983 | <a href="#">DGEL</a>   | 387.1874 | 415.1823 | <a href="#">DGELF</a>  | 534.2558 | 562.2508 |
| <a href="#">DGELFP</a> | 631.3086 | 659.3035 | <a href="#">GE</a>     | 159.0764 | 187.0713 | <a href="#">GEL</a>    | 272.1605 | 300.1554 |
| <a href="#">GELF</a>   | 419.2289 | 447.2238 | <a href="#">GELFP</a>  | 516.2817 | 544.2766 | <a href="#">EL</a>     | 215.1390 | 243.1339 |
| <a href="#">ELF</a>    | 362.2074 | 390.2023 | <a href="#">ELFP</a>   | 459.2602 | 487.2551 | <a href="#">LF</a>     | 233.1648 | 261.1598 |
| <a href="#">LFP</a>    | 330.2176 | 358.2125 | <a href="#">FP</a>     | 217.1335 | 245.1285 |                        |          |          |

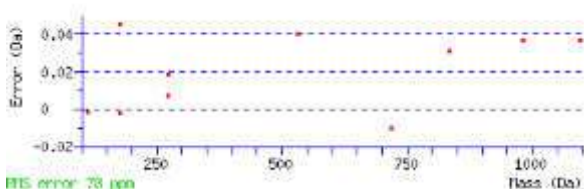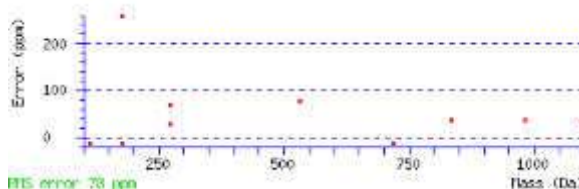

NCBI **BLAST** search of [RYFISDDFDGELFPR](#)

(Parameters: blastp, nr protein database, expect=20000, no filter, PAM30)

Other BLAST [web gateways](#)

#### All matches to this query

| Score | Mr(calc)  | Delta  | Sequence                            |
|-------|-----------|--------|-------------------------------------|
| 34.1  | 1811.8843 | 0.1512 | <a href="#">RYFISDDFDGELFPR</a>     |
| 20.3  | 1811.9755 | 0.0599 | <a href="#">ILHGTPVDPGQVRNGPR</a>   |
| 19.9  | 1811.8836 | 0.1518 | <a href="#">VGPVKADELADASGCAPR</a>  |
| 18.2  | 1811.9741 | 0.0613 | <a href="#">KNILGILLDDVSENNR</a>    |
| 16.7  | 1811.8802 | 0.1552 | <a href="#">AGDLGPGDLLAHPDDPR</a>   |
| 16.2  | 1811.9027 | 0.1327 | <a href="#">HHAAVDADVHQLAEKR</a>    |
| 16.2  | 1811.9027 | 0.1327 | <a href="#">HHAAVDADVHQLAEKR</a>    |
| 15.7  | 1811.8955 | 0.1399 | <a href="#">IGFTPWDGHPLAQSVR</a>    |
| 15.3  | 1811.9027 | 0.1327 | <a href="#">ALANIGGRAPSSWDGGAGR</a> |
| 14.8  | 1811.9265 | 0.1089 | <a href="#">IVTTHADIEDKQQTVK</a>    |

Mascot: <http://www.matrixscience.com/>




**Mascot Search Results**
**Peptide View**    **Spot no 116**
MS/MS Fragmentation of **FLGVTDSLLADGGELEIR**Found in **gi115477014** in **NCBIInr**, Os08g0487800 [Oryza sativa Japonica Group]

Match to Query 74: 1991.202924 from(1992.210200,1+) intensity(0.0000) index(27)

Title: Label: M6, Spot\_Id: 219766, Peak\_List\_Id: 226014, MSMS Job\_Run\_Id: 21831, Comment:

Data file C:\Documents and Settings\Administrator\Desktop\Farah-Garima 11May 2013\ppw\_M6\_136859901000.txt

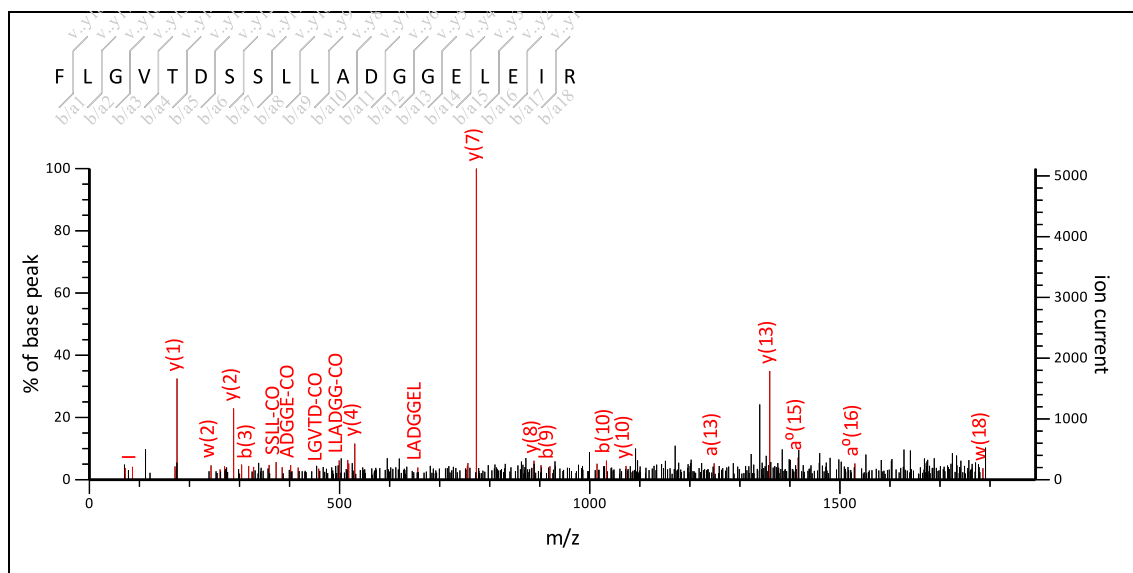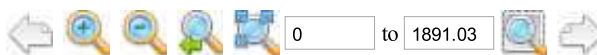Label all possible matches  Label matches used for scoring 

Monoisotopic mass of neutral peptide Mr(calc): 1991.0211

Fixed modifications: Carbamidomethyl (C) (apply to specified residues or termini only)

Ions Score: 18    Expect: 2.4e+02

Matches : 54/342 fragment ions using 125 most intense peaks ([help](#))

| #  | Immon.   | a         | a <sup>0</sup> | b         | b <sup>0</sup> | d         | d'        | Seq. | v         | w         | w'        | y         | y*        | y <sup>0</sup> | #  |
|----|----------|-----------|----------------|-----------|----------------|-----------|-----------|------|-----------|-----------|-----------|-----------|-----------|----------------|----|
| 1  | 120.0808 | 120.0808  |                | 148.0757  |                | 44.0495   |           | F    |           |           |           |           |           |                | 19 |
| 2  | 86.0964  | 233.1648  |                | 261.1598  |                | 191.1179  |           | L    | 1786.8817 | 1785.8865 |           | 1844.9600 | 1827.9334 | 1826.9494      | 18 |
| 3  | 30.0338  | 290.1863  |                | 318.1812  |                |           |           | G    |           |           |           | 1731.8759 | 1714.8494 | 1713.8654      | 17 |
| 4  | 72.0808  | 389.2547  |                | 417.2496  |                | 375.2391  |           | V    | 1630.7919 | 1643.8123 |           | 1674.8545 | 1657.8279 | 1656.8439      | 16 |
| 5  | 74.0600  | 490.3024  | 472.2918       | 518.2973  | 500.2867       | 474.3075  | 476.2867  | T    | 1529.7442 | 1542.7646 | 1544.7439 | 1575.7861 | 1558.7595 | 1557.7755      | 15 |
| 6  | 88.0393  | 605.3293  | 587.3188       | 633.3243  | 615.3137       | 561.3395  |           | D    | 1414.7172 | 1413.7220 |           | 1474.7384 | 1457.7118 | 1456.7278      | 14 |
| 7  | 60.0444  | 692.3614  | 674.3508       | 720.3563  | 702.3457       | 676.3665  |           | S    | 1327.6852 | 1326.6900 |           | 1359.7114 | 1342.6849 | 1341.7009      | 13 |
| 8  | 60.0444  | 779.3934  | 761.3828       | 807.3883  | 789.3777       | 763.3985  |           | S    | 1240.6532 | 1239.6579 |           | 1272.6794 | 1255.6529 | 1254.6688      | 12 |
| 9  | 86.0964  | 892.4775  | 874.4669       | 920.4724  | 902.4618       | 850.4305  |           | L    | 1127.5691 | 1126.5739 |           | 1185.6474 | 1168.6208 | 1167.6368      | 11 |
| 10 | 86.0964  | 1005.5615 | 987.5510       | 1033.5564 | 1015.5459      | 963.5146  |           | L    | 1014.4851 | 1013.4898 |           | 1072.5633 | 1055.5368 | 1054.5527      | 10 |
| 11 | 44.0495  | 1076.5986 | 1058.5881      | 1104.5936 | 1086.5830      |           |           | A    | 943.4480  |           |           | 959.4793  | 942.4527  | 941.4687       | 9  |
| 12 | 88.0393  | 1191.6256 | 1173.6150      | 1219.6205 | 1201.6099      | 1147.6358 |           | D    | 828.4210  | 827.4258  |           | 888.4421  | 871.4156  | 870.4316       | 8  |
| 13 | 30.0338  | 1248.6470 | 1230.6365      | 1276.6420 | 1258.6314      |           |           | G    |           |           |           | 773.4152  | 756.3886  | 755.4046       | 7  |
| 14 | 30.0338  | 1305.6685 | 1287.6579      | 1333.6634 | 1315.6529      |           |           | G    |           |           |           | 716.3937  | 699.3672  | 698.3832       | 6  |
| 15 | 102.0550 | 1434.7111 | 1416.7005      | 1462.7060 | 1444.6955      | 1376.7056 |           | E    | 585.3355  | 584.3402  |           | 659.3723  | 642.3457  | 641.3617       | 5  |
| 16 | 86.0964  | 1547.7952 | 1529.7846      | 1575.7901 | 1557.7795      | 1505.7482 |           | L    | 472.2514  | 471.2562  |           | 530.3297  | 513.3031  | 512.3191       | 4  |
| 17 | 102.0550 | 1676.8378 | 1658.8272      | 1704.8327 | 1686.8221      | 1618.8323 |           | E    | 343.2088  | 342.2136  |           | 417.2456  | 400.2191  | 399.2350       | 3  |
| 18 | 86.0964  | 1789.9218 | 1771.9113      | 1817.9167 | 1799.9062      | 1761.8905 | 1775.9062 | I    | 230.1248  | 243.1452  | 257.1608  | 288.2030  | 271.1765  |                | 2  |
| 19 | 129.1135 |           |                |           |                |           |           | R    | 74.0237   | 73.0284   |           | 175.1190  | 158.0924  |                | 1  |

| Seq      | ya       | yb       | Seq    | ya       | yb       | Seq     | ya       | yb       |
|----------|----------|----------|--------|----------|----------|---------|----------|----------|
| LG       | 143.1179 | 171.1128 | LGV    | 242.1863 | 270.1812 | LGVT    | 343.2340 | 371.2289 |
| LGVTD    | 458.2609 | 486.2558 | LGVTDS | 545.2930 | 573.2879 | LGVTDSS | 632.3250 | 660.3199 |
| GV       | 129.1022 | 157.0972 | GVT    | 230.1499 | 258.1448 | GVTD    | 345.1769 | 373.1718 |
| GVTDS    | 432.2089 | 460.2038 | GVTDSS | 519.2409 | 547.2358 | GVTDSSL | 632.3250 | 660.3199 |
| VT       | 173.1285 | 201.1234 | VTD    | 288.1554 | 316.1503 | VTDS    | 375.1874 | 403.1823 |
| VTDSS    | 462.2195 | 490.2144 | VTDSSL | 575.3035 | 603.2984 | VTDSSL  | 688.3876 | 716.3825 |
| TD       | 189.0870 | 217.0819 | TDS    | 276.1190 | 304.1139 | TDSS    | 363.1510 | 391.1460 |
| TDSSL    | 476.2351 | 504.2300 | TDSSL  | 589.3192 | 617.3141 | TDSSLLA | 660.3563 | 688.3512 |
| DS       | 175.0713 | 203.0662 | DSS    | 262.1034 | 290.0983 | DSSL    | 375.1874 | 403.1823 |
| DSSL     | 488.2715 | 516.2664 | DSSLLA | 559.3086 | 587.3035 | DSSLLAD | 674.3355 | 702.3305 |
| SS       | 147.0764 | 175.0713 | SSL    | 260.1605 | 288.1554 | SSLL    | 373.2445 | 401.2395 |
| SSLLA    | 444.2817 | 472.2766 | SSLLAD | 559.3086 | 587.3035 | SSLLADG | 616.3301 | 644.3250 |
| SSLLADGG | 673.3515 | 701.3464 | SL     | 173.1285 | 201.1234 | SLL     | 286.2125 | 314.2074 |
| SLLA     | 357.2496 | 385.2445 | SLLAD  | 472.2766 | 500.2715 | SLLADG  | 529.2980 | 557.2930 |
| SLLADGG  | 586.3195 | 614.3144 | LL     | 199.1805 | 227.1754 | LLA     | 270.2176 | 298.2125 |
| LLAD     | 385.2445 | 413.2395 | LLADG  | 442.2660 | 470.2609 | LLADGG  | 499.2875 | 527.2824 |
| LLADGGE  | 628.3301 | 656.3250 | LA     | 157.1335 | 185.1285 | LAD     | 272.1605 | 300.1554 |
| LADG     | 329.1819 | 357.1769 | LADGG  | 386.2034 | 414.1983 | LADGGE  | 515.2460 | 543.2409 |
| LADGGEL  | 628.3301 | 656.3250 | AD     | 159.0764 | 187.0713 | ADG     | 216.0979 | 244.0928 |
| ADGG     | 273.1193 | 301.1143 | ADGGE  | 402.1619 | 430.1569 | ADGGEL  | 515.2460 | 543.2409 |
| ADGGELE  | 644.2886 | 672.2835 | DG     | 145.0608 | 173.0557 | DGG     | 202.0822 | 230.0771 |
| DGGE     | 331.1248 | 359.1197 | DGGEL  | 444.2089 | 472.2038 | DGGELE  | 573.2515 | 601.2464 |
| DGGELEI  | 686.3355 | 714.3305 | GG     | 87.0553  | 115.0502 | GGE     | 216.0979 | 244.0928 |
| GGEL     | 329.1819 | 357.1769 | GGELE  | 458.2245 | 486.2195 | GGELEI  | 571.3086 | 599.3035 |
| GE       | 159.0764 | 187.0713 | GEL    | 272.1605 | 300.1554 | GELE    | 401.2031 | 429.1980 |
| GELEI    | 514.2871 | 542.2821 | EL     | 215.1390 | 243.1339 | ELE     | 344.1816 | 372.1765 |
| ELEI     | 457.2657 | 485.2606 | LE     | 215.1390 | 243.1339 | LEI     | 328.2231 | 356.2180 |
| EI       | 215.1390 | 243.1339 |        |          |          |         |          |          |

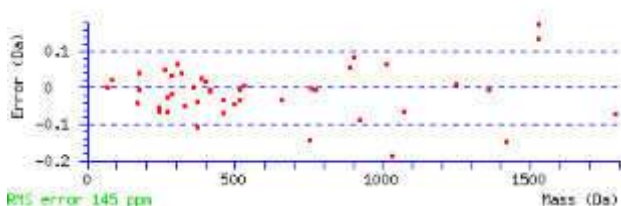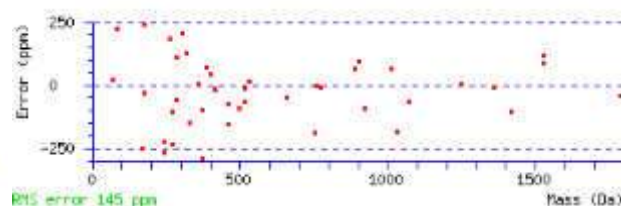

NCBI BLAST search of [FLGVTDSSLLADGGELEIR](#)

(Parameters: blastp, nr protein database, expect=20000, no filter, PAM30)

Other BLAST [web gateways](#)

#### All matches to this query

| Score | Mr(calc)  | Delta  | Sequence                             |
|-------|-----------|--------|--------------------------------------|
| 17.6  | 1991.0211 | 0.1818 | <a href="#">FLGVTDSSLLADGGELEIR</a>  |
| 14.4  | 1991.0701 | 0.1328 | <a href="#">HRAEQIVAASGVPTTLR</a>    |
| 12.9  | 1991.0265 | 0.1764 | <a href="#">SNFNVAAPILFWGDTAIR</a>   |
| 12.0  | 1991.0800 | 0.1230 | <a href="#">VAPPGRSLADLAADAALDLR</a> |
| 11.0  | 1991.0490 | 0.1540 | <a href="#">ALHKFOPNALVHFGEOR</a>    |
| 10.7  | 1991.0258 | 0.1771 | <a href="#">IMYSLHNGTSSISAKNLR</a>   |
| 9.9   | 1991.0225 | 0.1804 | <a href="#">GASQKGVYIDTVYGHQIR</a>   |
| 9.5   | 1991.0476 | 0.1553 | <a href="#">YSIPPENIIGHSDIAPLR</a>   |
| 9.3   | 1991.0258 | 0.1771 | <a href="#">IDLVLSTHNDQSMHLLR</a>    |
| 8.9   | 1991.0106 | 0.1923 | <a href="#">TGSNLCDVTVTAGKQALR</a>   |

**Mascot:** <http://www.matrixscience.com/>

**MATRIX SCIENCE Mascot Search Results**

**Peptide View Spot no 116**

MS/MS Fragmentation of **AFNEFLDPLAYTHFTTEGEVEFR**

Found in **gi|115477014** in **NCBI nr**, Os08g0487800 [Oryza sativa Japonica Group]

Match to Query 87: 2732.527924 from(2733.535200,1+) intensity(0.0000) index(33)

Title: Label: M6, Spot\_Id: 219766, Peak\_List\_Id: 226009, MSMS Job\_Run\_Id: 21831, Comment:

Data file C:\Documents and Settings\Administrator\Desktop\Farah-Garima 11May 2013\ppw\_M6\_136859901000.txt

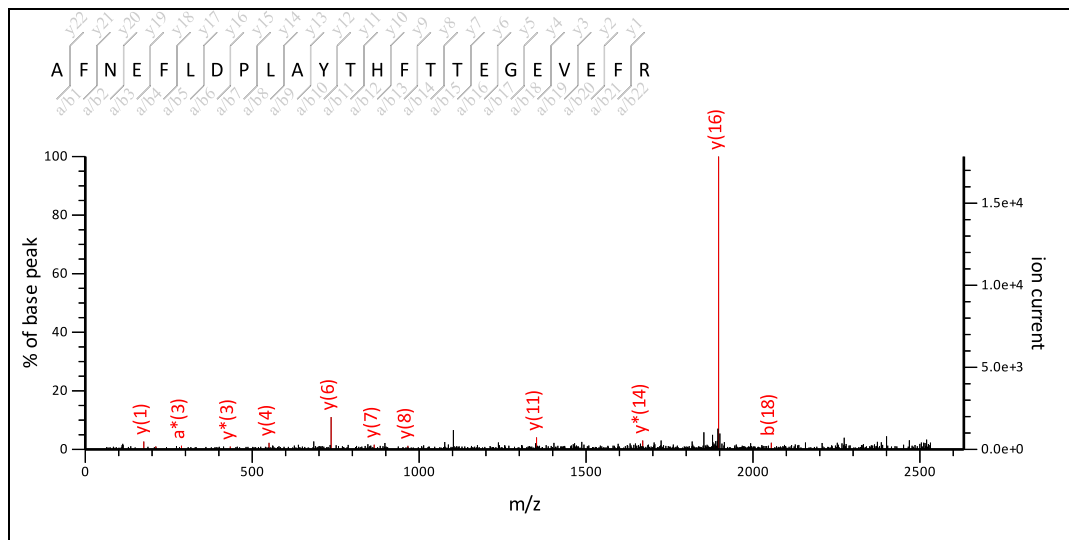

Navigation icons: Home, Back, Forward, Search, Print, etc. Search range: 0 to 2631.64

Label all possible matches  Label matches used for scoring

Monoisotopic mass of neutral peptide Mr(calc): 2732.2758

Fixed modifications: Carbamidomethyl (C) (apply to specified residues or termini only)

Ions Score: 10 Expect: 1.9e+03

Matches : 17/434 fragment ions using 50 most intense peaks [\(help\)](#)

| #  | Immon.   | a         | a*        | a <sup>0</sup> | b         | b*        | b <sup>0</sup> | d         | d'        | Seq. | v         | w         | w'        | y         | y*        |
|----|----------|-----------|-----------|----------------|-----------|-----------|----------------|-----------|-----------|------|-----------|-----------|-----------|-----------|-----------|
| 1  | 44.0495  | 44.0495   |           |                | 72.0444   |           |                | 44.0495   |           | A    |           |           |           |           |           |
| 2  | 120.0808 | 191.1179  |           |                | 219.1128  |           |                |           |           | F    | 2570.1834 |           |           | 2662.2460 | 2645.2195 |
| 3  | 87.0553  | 305.1608  | 288.1343  |                | 333.1557  | 316.1292  |                | 262.1550  |           | N    | 2456.1405 | 2455.1452 |           | 2515.1776 | 2498.1510 |
| 4  | 102.0550 | 434.2034  | 417.1769  | 416.1928       | 462.1983  | 445.1718  | 444.1878       | 376.1979  |           | E    | 2327.0979 | 2326.1026 |           | 2401.1347 | 2384.1081 |
| 5  | 120.0808 | 581.2718  | 564.2453  | 563.2613       | 609.2667  | 592.2402  | 591.2562       |           |           | F    | 2180.0295 |           |           | 2272.0921 | 2255.0655 |
| 6  | 86.0964  | 694.3559  | 677.3293  | 676.3453       | 722.3508  | 705.3243  | 704.3402       | 652.3089  |           | L    | 2066.9454 | 2065.9502 |           | 2125.0237 | 2107.9971 |
| 7  | 88.0393  | 809.3828  | 792.3563  | 791.3723       | 837.3777  | 820.3512  | 819.3672       | 765.3930  |           | D    | 1951.9185 | 1950.9232 |           | 2011.9396 | 1994.9131 |
| 8  | 70.0651  | 906.4356  | 889.4090  | 888.4250       | 934.4305  | 917.4040  | 916.4199       | 880.4199  |           | P    | 1854.8657 | 1853.8705 |           | 1896.9127 | 1879.8861 |
| 9  | 86.0964  | 1019.5197 | 1002.4931 | 1001.5091      | 1047.5146 | 1030.4880 | 1029.5040      | 977.4727  |           | L    | 1741.7816 | 1740.7864 |           | 1799.8599 | 1782.8333 |
| 10 | 44.0495  | 1090.5568 | 1073.5302 | 1072.5462      | 1118.5517 | 1101.5251 | 1100.5411      |           |           | A    | 1670.7445 |           |           | 1686.7758 | 1669.7493 |
| 11 | 136.0757 | 1253.6201 | 1236.5936 | 1235.6095      | 1281.6150 | 1264.5885 | 1263.6045      |           |           | Y    | 1507.6812 |           |           | 1615.7387 | 1598.7122 |
| 12 | 74.0600  | 1354.6678 | 1337.6412 | 1336.6572      | 1382.6627 | 1365.6361 | 1364.6521      | 1338.6729 | 1340.6521 | T    | 1406.6335 | 1419.6539 | 1421.6332 | 1452.6754 | 1435.6488 |
| 13 | 110.0713 | 1491.7267 | 1474.7001 | 1473.7161      | 1519.7216 | 1502.6951 | 1501.7110      |           |           | H    | 1269.5746 |           |           | 1351.6277 | 1334.6012 |
| 14 | 120.0808 | 1638.7951 | 1621.7686 | 1620.7845      | 1666.7900 | 1649.7635 | 1648.7795      |           |           | F    | 1122.5062 |           |           | 1214.5688 | 1197.5422 |
| 15 | 74.0600  | 1739.8428 | 1722.8162 | 1721.8322      | 1767.8377 | 1750.8112 | 1749.8271      | 1723.8479 | 1725.8271 | T    | 1021.4585 | 1034.4789 | 1036.4582 | 1067.5004 | 1050.4738 |
| 16 | 74.0600  | 1840.8905 | 1823.8639 | 1822.8799      | 1868.8854 | 1851.8588 | 1850.8748      | 1824.8955 | 1826.8748 | T    | 920.4108  | 933.4312  | 935.4105  | 966.4527  | 949.4262  |
| 17 | 102.0550 | 1969.9331 | 1952.9065 | 1951.9225      | 1997.9280 | 1980.9014 | 1979.9174      | 1911.9276 |           | E    | 791.3682  | 790.3730  |           | 865.4050  | 848.3785  |
| 18 | 30.0338  | 2026.9545 | 2009.9280 | 2008.9440      | 2054.9494 | 2037.9229 | 2036.9389      |           |           | G    |           |           |           | 736.3624  | 719.3359  |
| 19 | 102.0550 | 2155.9971 | 2138.9706 | 2137.9865      | 2183.9920 | 2166.9655 | 2165.9815      | 2097.9916 |           | E    | 605.3042  | 604.3089  |           | 679.3410  | 662.3144  |
| 20 | 72.0808  | 2255.0655 | 2238.0390 | 2237.0550      | 2283.0604 | 2266.0339 | 2265.0499      | 2241.0499 |           | V    | 506.2358  | 519.2562  |           | 550.2984  | 533.2718  |
| 21 | 102.0550 | 2384.1081 | 2367.0816 | 2366.0976      | 2412.1030 | 2395.0765 | 2394.0925      | 2326.1026 |           | E    | 377.1932  | 376.1979  |           | 451.2300  | 434.2034  |
| 22 | 120.0808 | 2531.1765 | 2514.1500 | 2513.1660      | 2559.1714 | 2542.1449 | 2541.1609      |           |           | F    | 230.1248  |           |           | 322.1874  | 305.1608  |
| 23 | 129.1135 |           |           |                |           |           |                |           |           | R    | 74.0237   | 73.0284   |           | 175.1190  | 158.0924  |

| Seq    | ya       | yb       | Seq    | ya       | yb       | Seq    | ya       | yb       |
|--------|----------|----------|--------|----------|----------|--------|----------|----------|
| FN     | 234.1237 | 262.1186 | FNE    | 363.1663 | 391.1612 | FNEF   | 510.2347 | 538.2296 |
| FNEFL  | 623.3188 | 651.3137 | NE     | 216.0979 | 244.0928 | NEF    | 363.1663 | 391.1612 |
| NEFL   | 476.2504 | 504.2453 | NEFLD  | 591.2773 | 619.2722 | NEFLDP | 688.3301 | 716.3250 |
| EF     | 249.1234 | 277.1183 | EFL    | 362.2074 | 390.2023 | EFLD   | 477.2344 | 505.2293 |
| EFLDP  | 574.2871 | 602.2821 | EFLDPL | 687.3712 | 715.3661 | FL     | 233.1648 | 261.1598 |
| FLD    | 348.1918 | 376.1867 | FLDP   | 445.2445 | 473.2395 | FLDPL  | 558.3286 | 586.3235 |
| FLDPLA | 629.3657 | 657.3606 | LD     | 201.1234 | 229.1183 | LDP    | 298.1761 | 326.1710 |
| LDPL   | 411.2602 | 439.2551 | LDPLA  | 482.2973 | 510.2922 | LDPLAY | 645.3606 | 673.3556 |
| DP     | 185.0921 | 213.0870 | DPL    | 298.1761 | 326.1710 | DPLA   | 369.2132 | 397.2082 |
| DPLAY  | 532.2766 | 560.2715 | DPLAYT | 633.3243 | 661.3192 | PL     | 183.1492 | 211.1441 |
| PLA    | 254.1863 | 282.1812 | PLAY   | 417.2496 | 445.2445 | PLAYT  | 518.2973 | 546.2922 |
| PLAYTH | 655.3562 | 683.3511 | LA     | 157.1335 | 185.1285 | LAY    | 320.1969 | 348.1918 |
| LAYT   | 421.2445 | 449.2395 | LAYTH  | 558.3035 | 586.2984 | AY     | 207.1128 | 235.1077 |
| AYT    | 308.1605 | 336.1554 | AYTH   | 445.2194 | 473.2143 | AYTHF  | 592.2878 | 620.2827 |
| AYTHFT | 693.3355 | 721.3304 | YT     | 237.1234 | 265.1183 | YTH    | 374.1823 | 402.1772 |
| YTHF   | 521.2507 | 549.2456 | YTHFT  | 622.2984 | 650.2933 | TH     | 211.1190 | 239.1139 |
| THF    | 358.1874 | 386.1823 | THFT   | 459.2350 | 487.2300 | THFTT  | 560.2827 | 588.2776 |
| THFTTE | 689.3253 | 717.3202 | HF     | 257.1397 | 285.1346 | HFT    | 358.1874 | 386.1823 |
| HFTT   | 459.2350 | 487.2300 | HFTTE  | 588.2776 | 616.2726 | HFTTEG | 645.2991 | 673.2940 |
| FT     | 221.1285 | 249.1234 | FTT    | 322.1761 | 350.1710 | FTTE   | 451.2187 | 479.2136 |
| FTTEG  | 508.2402 | 536.2351 | FTTEGE | 637.2828 | 665.2777 | TT     | 175.1077 | 203.1026 |
| TTE    | 304.1503 | 332.1452 | TTEG   | 361.1718 | 389.1667 | TTEGE  | 490.2144 | 518.2093 |
| TTEGEV | 589.2828 | 617.2777 | TE     | 203.1026 | 231.0975 | TEG    | 260.1241 | 288.1190 |
| TEGE   | 389.1667 | 417.1616 | TEGEV  | 488.2351 | 516.2300 | TEGEVE | 617.2777 | 645.2726 |
| EG     | 159.0764 | 187.0713 | EGE    | 288.1190 | 316.1139 | EGEV   | 387.1874 | 415.1823 |
| EGEVE  | 516.2300 | 544.2249 | EGEVEF | 663.2984 | 691.2933 | GE     | 159.0764 | 187.0713 |
| GEV    | 258.1448 | 286.1397 | GEVE   | 387.1874 | 415.1823 | GEVEF  | 534.2558 | 562.2508 |
| EV     | 201.1234 | 229.1183 | EVE    | 330.1660 | 358.1609 | EVEF   | 477.2344 | 505.2293 |
| VE     | 201.1234 | 229.1183 | VEF    | 348.1918 | 376.1867 | EF     | 249.1234 | 277.1183 |

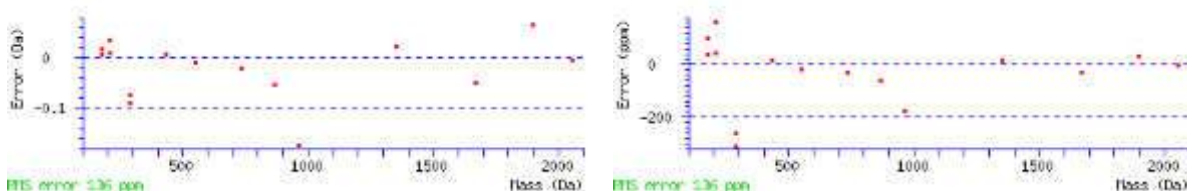

NCBI BLAST search of [AFNEFLDPLAYTHFTTEGEVEFR](#)  
 (Parameters: blastp, nr protein database, expect=20000, no filter, PAM30)  
 Other BLAST [web gateways](#)

All matches to this query

| Score | Mr(calc)  | Delta  | Sequence                                    |
|-------|-----------|--------|---------------------------------------------|
| 9.8   | 2732.2758 | 0.2521 | <a href="#">AFNEFLDPLAYTHFTTEGEVEFR</a>     |
| 7.4   | 2732.3446 | 0.1833 | <a href="#">LQYGDLEHVLDLTDGLHDYLTDFLR</a>   |
| 6.5   | 2732.4650 | 0.0629 | <a href="#">HTITNLDPPPLVAPFDGYSLHKILR</a>   |
| 6.1   | 2732.3592 | 0.1687 | <a href="#">MGYGTAGQALAVLLGTDGHQLEVFER</a>  |
| 6.0   | 2732.3895 | 0.1384 | <a href="#">QEGFDVYVNAANAWLRPGGGVAGAIHR</a> |
| 5.7   | 2732.3446 | 0.1833 | <a href="#">LEAFFAGTDDGKLPVDEWLALR</a>      |
| 5.4   | 2732.3379 | 0.1900 | <a href="#">GHEQSOIGAHGATPESDAEVAROALR</a>  |
| 5.0   | 2732.3340 | 0.1939 | <a href="#">DKLIEGVQFHPESIASEHGAMLR</a>     |
| 4.9   | 2732.4650 | 0.0629 | <a href="#">KTHPPVLTDLNEGFLYVTGHLPIR</a>    |
| 4.0   | 2732.3055 | 0.2224 | <a href="#">SLDFDSARLPNPHIRPEHEEWR</a>      |

**MATRIX SCIENCE Mascot Search Results**

**Peptide View Spot no 118**

**MS/MS Fragmentation of TYPQQAGTIR**

Found in **gi|108711192** in **NCBI**nr, Eukaryotic translation initiation factor 5A-2, putative, expressed [Oryza sativa Japonica Group]

Match to Query 30: 1133.637124 from(1134.644400,1+) intensity(0.0000) index(8)

Title: Label: N8, Spot\_Id: 219799, Peak\_List\_Id: 226504, MSMS Job\_Run\_Id: 21847, Comment:

Data file C:\Documents and Settings\Administrator\Desktop\Farah-Garima 11May 2013\ppw\_N8\_136859933900.txt

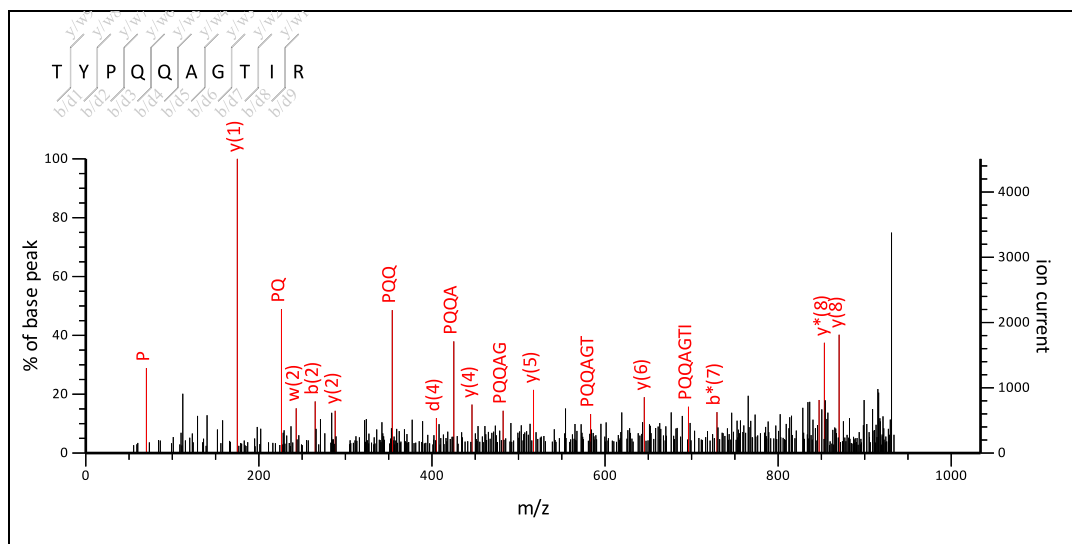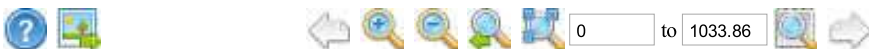

Label all possible matches  Label matches used for scoring

**Monoisotopic mass of neutral peptide Mr(calc):** 1133.5829

**Fixed modifications:** Carbamidomethyl (C) (apply to specified residues or termini only)

**Ions Score:** 40 **Expect:** 3.5

**Matches:** 21/159 fragment ions using 27 most intense peaks ([help](#))

| #  | Immon.         | a        | a*       | a <sup>0</sup> | b               | b*              | b <sup>0</sup> | d               | d'       | Seq. | v        | w               | w'       | y               | y*              | y <sup>0</sup> | #  |
|----|----------------|----------|----------|----------------|-----------------|-----------------|----------------|-----------------|----------|------|----------|-----------------|----------|-----------------|-----------------|----------------|----|
| 1  | 74.0600        | 74.0600  |          | 56.0495        | 102.0550        |                 | 84.0444        | 44.0495         |          | T    |          |                 |          |                 |                 |                | 10 |
| 2  | 136.0757       | 237.1234 |          | 219.1128       | <b>265.1183</b> |                 | 247.1077       |                 |          | Y    | 925.4850 |                 |          | 1033.5425       | 1016.5160       | 1015.5320      | 9  |
| 3  | <b>70.0651</b> | 334.1761 |          | 316.1656       | 362.1710        |                 | 344.1605       | 308.1605        |          | P    | 828.4322 | 827.4370        |          | <b>870.4792</b> | <b>853.4526</b> | 852.4686       | 8  |
| 4  | 101.0709       | 462.2347 | 445.2082 | 444.2241       | 490.2296        | 473.2031        | 472.2191       | <b>405.2132</b> |          | Q    | 700.3737 | 699.3784        |          | 773.4264        | 756.3999        | 755.4159       | 7  |
| 5  | 101.0709       | 590.2933 | 573.2667 | 572.2827       | 618.2882        | 601.2617        | 600.2776       | 533.2718        |          | Q    | 572.3151 | 571.3198        |          | <b>645.3679</b> | 628.3413        | 627.3573       | 6  |
| 6  | 44.0495        | 661.3304 | 644.3039 | 643.3198       | 689.3253        | 672.2988        | 671.3148       |                 |          | A    | 501.2780 |                 |          | <b>517.3093</b> | 500.2827        | 499.2987       | 5  |
| 7  | 30.0338        | 718.3519 | 701.3253 | 700.3413       | 746.3468        | <b>729.3202</b> | 728.3362       |                 |          | G    |          |                 |          | <b>446.2722</b> | 429.2456        | 428.2616       | 4  |
| 8  | 74.0600        | 819.3995 | 802.3730 | 801.3890       | <b>847.3945</b> | 830.3679        | 829.3839       | 803.4046        | 805.3839 | T    | 343.2088 | 356.2292        | 358.2085 | 389.2507        | 372.2241        | 371.2401       | 3  |
| 9  | 86.0964        | 932.4836 | 915.4571 | 914.4730       | 960.4785        | 943.4520        | 942.4680       | 904.4523        | 918.4680 | I    | 230.1248 | <b>243.1452</b> | 257.1608 | <b>288.2030</b> | 271.1765        |                | 2  |
| 10 | 129.1135       |          |          |                |                 |                 |                |                 |          | R    | 74.0237  | 73.0284         |          | <b>175.1190</b> | 158.0924        |                | 1  |

| Seq    | ya       | yb              | Seq     | ya       | yb              | Seq   | ya       | yb              |
|--------|----------|-----------------|---------|----------|-----------------|-------|----------|-----------------|
| YP     | 233.1285 | 261.1234        | YPQ     | 361.1870 | 389.1819        | YPQQ  | 489.2456 | <b>517.2405</b> |
| YPQA   | 560.2827 | 588.2776        | YPQQAG  | 617.3042 | <b>645.2991</b> | PQ    | 198.1237 | <b>226.1186</b> |
| PQQ    | 326.1823 | <b>354.1772</b> | PQQA    | 397.2194 | <b>425.2143</b> | PQQAG | 454.2409 | <b>482.2358</b> |
| PQQAGT | 555.2885 | <b>583.2835</b> | PQQAGTI | 668.3726 | <b>696.3675</b> | QQ    | 229.1295 | 257.1244        |
| QQA    | 300.1666 | 328.1615        | QQAG    | 357.1881 | 385.1830        | QQAGT | 458.2358 | 486.2307        |
| QQAGTI | 571.3198 | 599.3148        | QA      | 172.1081 | 200.1030        | QAG   | 229.1295 | 257.1244        |
| QAGT   | 330.1772 | 358.1721        | QAGTI   | 443.2613 | 471.2562        | AG    | 101.0709 | 129.0659        |
| AGT    | 202.1186 | 230.1135        | AGTI    | 315.2027 | 343.1976        | GT    | 131.0815 | 159.0764        |
| GTI    | 244.1656 | 272.1605        | TI      | 187.1441 | 215.1390        |       |          |                 |

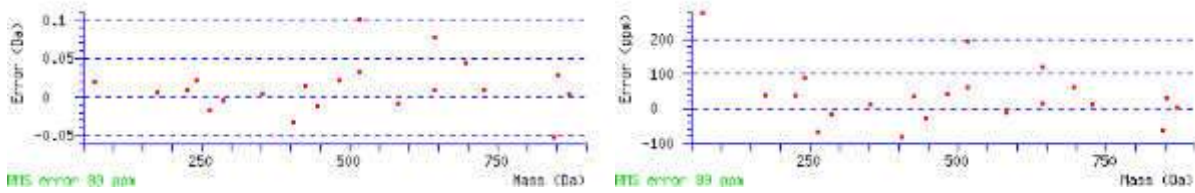

NCBI **BLAST** search of [TYPOQAGTIR](#)

(Parameters: blastp, nr protein database, expect=20000, no filter, PAM30)

Other BLAST [web gateways](#)

**All matches to this query**

| Score | Mr(calc)  | Delta   | Sequence                      |
|-------|-----------|---------|-------------------------------|
| 40.2  | 1133.5829 | 0.0542  | <a href="#">TYPOQAGTIR</a>    |
| 24.8  | 1133.5499 | 0.0873  | <a href="#">GAAAMAEASIR</a>   |
| 22.5  | 1133.6669 | -0.0298 | <a href="#">QAVAGLLGHLR</a>   |
| 20.3  | 1133.5802 | 0.0569  | <a href="#">APGAGAGHGAGRR</a> |
| 20.2  | 1133.6379 | -0.0008 | <a href="#">KPKAMAGFLR</a>    |
| 19.8  | 1133.6557 | -0.0186 | <a href="#">ILDPIHGHIR</a>    |
| 19.3  | 1133.5651 | 0.0720  | <a href="#">MKETYGHIR</a>     |
| 19.1  | 1133.6193 | 0.0178  | <a href="#">AAGKPGYTTLR</a>   |
| 18.8  | 1133.6040 | 0.0331  | <a href="#">GETTOTKIR</a>     |
| 18.2  | 1133.6227 | 0.0145  | <a href="#">NALAMTKTLR</a>    |

Mascot: <http://www.matrixscience.com/>




**Mascot Search Results**
**Peptide View**      **Spot no 118**
**MS/MS Fragmentation of CHFVAIDIFNGK**

 Found in **gi|108711192** in **NCBI nr**, Eukaryotic translation initiation factor 5A-2, putative, expressed [Oryza sativa Japonica Group]

Match to Query 61: 1419.753224 from(1420.760500,1+) intensity(0.0000) index(17)

Title: Label: N8, Spot\_Id: 219799, Peak\_List\_Id: 226513, MSMS Job\_Run\_Id: 21847, Comment:

Data file C:\Documents and Settings\Administrator\Desktop\Farah-Garima 11May 2013\ppw\_N8\_136859933900.txt

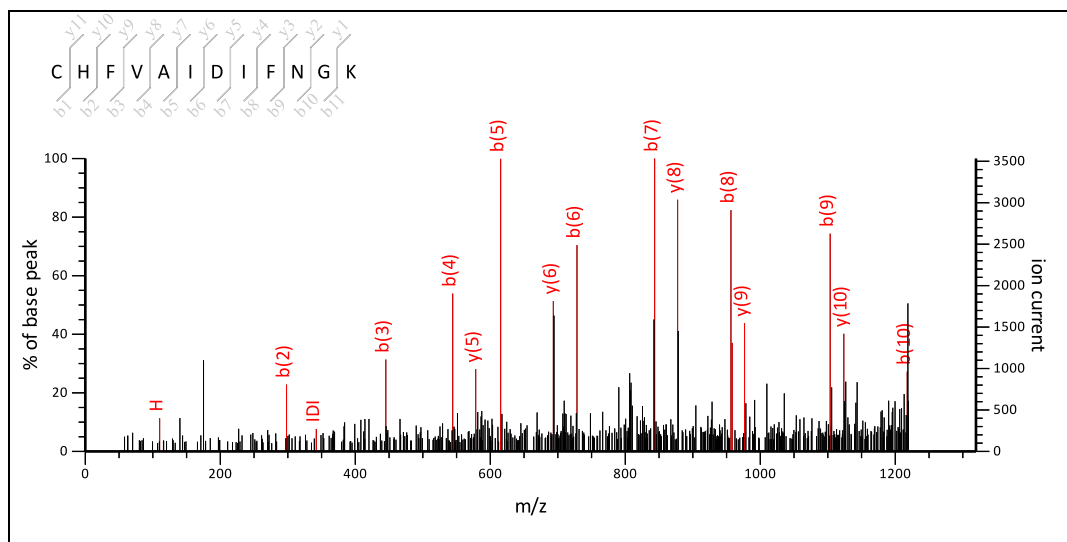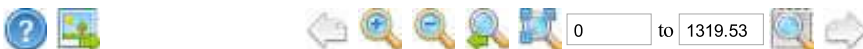
 Label all possible matches       Label matches used for scoring 

Monoisotopic mass of neutral peptide Mr(calc): 1419.6969

Fixed modifications: Carbamidomethyl (C) (apply to specified residues or termini only)

Ions Score: 73      Expect: 0.0017

 Matches : 17/172 fragment ions using 24 most intense peaks ([help](#))

| #  | Immon.   | a         | a*        | a <sup>0</sup> | b         | b*        | b <sup>0</sup> | d         | d'       | Seq. | v         | w        | w'       | y         | y*        | y     |
|----|----------|-----------|-----------|----------------|-----------|-----------|----------------|-----------|----------|------|-----------|----------|----------|-----------|-----------|-------|
| 1  | 133.0430 | 133.0430  |           |                | 161.0379  |           |                | 44.0495   |          | C    |           |          |          |           |           |       |
| 2  | 110.0713 | 270.1019  |           |                | 298.0968  |           |                |           |          | H    | 1178.6204 |          |          | 1260.6735 | 1243.6470 | 1242. |
| 3  | 120.0808 | 417.1703  |           |                | 445.1653  |           |                |           |          | F    | 1031.5520 |          |          | 1123.6146 | 1106.5881 | 1105. |
| 4  | 72.0808  | 516.2387  |           |                | 544.2337  |           |                | 502.2231  |          | V    | 932.4836  | 945.5040 |          | 976.5462  | 959.5197  | 958.  |
| 5  | 44.0495  | 587.2759  |           |                | 615.2708  |           |                |           |          | A    | 861.4465  |          |          | 877.4778  | 860.4512  | 859.  |
| 6  | 86.0964  | 700.3599  |           |                | 728.3548  |           |                | 672.3286  | 686.3443 | I    | 748.3624  | 761.3828 | 775.3985 | 806.4407  | 789.4141  | 788.  |
| 7  | 88.0393  | 815.3869  |           | 797.3763       | 843.3818  |           | 825.3712       | 771.3970  |          | D    | 633.3355  | 632.3402 |          | 693.3566  | 676.3301  | 675.  |
| 8  | 86.0964  | 928.4709  |           | 910.4604       | 956.4658  |           | 938.4553       | 900.4396  | 914.4553 | I    | 520.2514  | 533.2718 | 547.2875 | 578.3297  | 561.3031  |       |
| 9  | 120.0808 | 1075.5393 |           | 1057.5288      | 1103.5343 |           | 1085.5237      |           |          | F    | 373.1830  |          |          | 465.2456  | 448.2191  |       |
| 10 | 87.0553  | 1189.5823 | 1172.5557 | 1171.5717      | 1217.5772 | 1200.5506 | 1199.5666      | 1146.5765 |          | N    | 259.1401  | 258.1448 |          | 318.1772  | 301.1506  |       |
| 11 | 30.0338  | 1246.6037 | 1229.5772 | 1228.5932      | 1274.5987 | 1257.5721 | 1256.5881      |           |          | G    |           |          |          | 204.1343  | 187.1077  |       |
| 12 | 101.1073 |           |           |                |           |           |                |           |          | K    | 74.0237   | 73.0284  |          | 147.1128  | 130.0863  |       |

| Seq    | ya       | yb       | Seq    | ya       | yb       | Seq    | ya       | yb       |
|--------|----------|----------|--------|----------|----------|--------|----------|----------|
| HF     | 257.1397 | 285.1346 | HFV    | 356.2081 | 384.2030 | HFVA   | 427.2452 | 455.2401 |
| HFVAI  | 540.3293 | 568.3242 | HFVAID | 655.3562 | 683.3511 | FV     | 219.1492 | 247.1441 |
| FVA    | 290.1863 | 318.1812 | FVAI   | 403.2704 | 431.2653 | FVAID  | 518.2973 | 546.2922 |
| FVAIDI | 631.3814 | 659.3763 | VA     | 143.1179 | 171.1128 | VAI    | 256.2020 | 284.1969 |
| VAID   | 371.2289 | 399.2238 | VAIDI  | 484.3130 | 512.3079 | VAIDIF | 631.3814 | 659.3763 |
| AI     | 157.1335 | 185.1285 | AID    | 272.1605 | 300.1554 | AIDI   | 385.2445 | 413.2395 |
| AIDIF  | 532.3130 | 560.3079 | AIDIFN | 646.3559 | 674.3508 | ID     | 201.1234 | 229.1183 |
| IDI    | 314.2074 | 342.2023 | IDIF   | 461.2758 | 489.2708 | IDIFN  | 575.3188 | 603.3137 |
| IDIFNG | 632.3402 | 660.3352 | DI     | 201.1234 | 229.1183 | DIF    | 348.1918 | 376.1867 |

|             |          |          |              |          |          |           |          |          |
|-------------|----------|----------|--------------|----------|----------|-----------|----------|----------|
| <b>DIFN</b> | 462.2347 | 490.2296 | <b>DIFNG</b> | 519.2562 | 547.2511 | <b>IF</b> | 233.1648 | 261.1598 |
| <b>IFN</b>  | 347.2078 | 375.2027 | <b>IFNG</b>  | 404.2292 | 432.2241 | <b>FN</b> | 234.1237 | 262.1186 |
| <b>FNG</b>  | 291.1452 | 319.1401 | <b>NG</b>    | 144.0768 | 172.0717 |           |          |          |

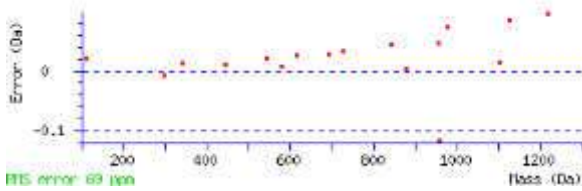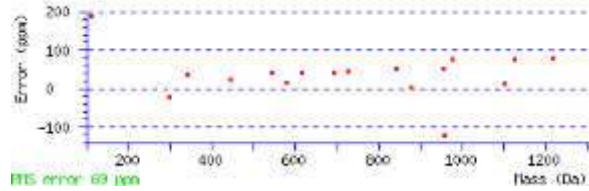

NCBI BLAST search of [CHFVAIDIFNGK](#)

(Parameters: blastp, nr protein database, expect=20000, no filter, PAM30)

Other BLAST [web gateways](#)

#### All matches to this query

| Score | Mr(calc)  | Delta   | Sequence                       |
|-------|-----------|---------|--------------------------------|
| 73.0  | 1419.6969 | 0.0563  | <a href="#">CHFVAIDIFNGK</a>   |
| 73.0  | 1419.6969 | 0.0563  | <a href="#">CHFVALDIFNGK</a>   |
| 44.2  | 1419.6664 | 0.0868  | <a href="#">VGSDNAVLDMDIR</a>  |
| 43.3  | 1419.7511 | 0.0022  | <a href="#">DPLFAVITENQR</a>   |
| 40.2  | 1419.6969 | 0.0563  | <a href="#">CHFVAIDVFNAK</a>   |
| 39.9  | 1419.6552 | 0.0981  | <a href="#">DDLEGLIDLMDR</a>   |
| 36.6  | 1419.6882 | 0.0651  | <a href="#">LEDDLIDIFDR</a>    |
| 33.6  | 1419.7106 | 0.0426  | <a href="#">HADAALAALAPEDR</a> |
| 33.1  | 1419.7246 | 0.0287  | <a href="#">DSDLFDLIDLVR</a>   |
| 32.6  | 1419.7544 | -0.0012 | <a href="#">LSPFVALGCITSR</a>  |

Mascot: <http://www.matrixscience.com/>

**MATRIX SCIENCE Mascot Search Results**

**Peptide View Spot no 118**

MS/MS Fragmentation of **KLEDIVPSSHNC DVPHVNR**

Found in **gi108711192** in **NCBI nr**, Eukaryotic translation initiation factor 5A-2, putative, expressed [Oryza sativa Japonica Group]

Match to Query 106: 2215.193424 from(2216.200700,1+) intensity(0.0000) index(32)

Title: Label: N8, Spot\_Id: 219799, Peak\_List\_Id: 226503, MSMS Job\_Run\_Id: 21847, Comment:

Data file C:\Documents and Settings\Administrator\Desktop\Farah-Garima 11May 2013\ppw\_N8\_136859933900.txt

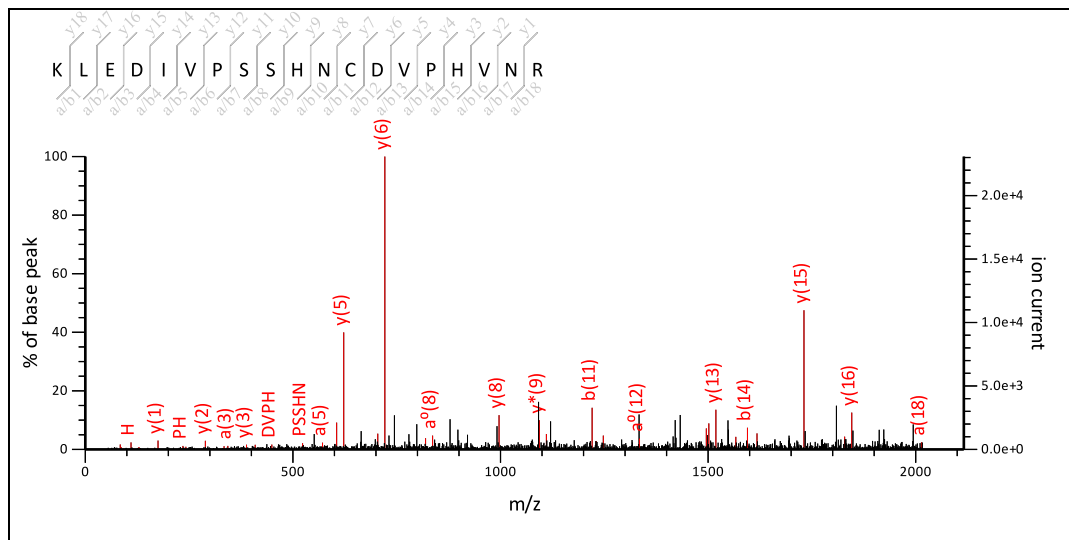

Navigation icons: Home, Back, Forward, Search, etc. Search range: 0 to 2115.94

Label all possible matches  Label matches used for scoring

Monoisotopic mass of neutral peptide Mr(calc): 2215.0804

Fixed modifications: Carbamidomethyl (C) (apply to specified residues or termini only)

Ions Score: 75 Expect: 0.00073

Matches : 49/358 fragment ions using 80 most intense peaks (help)

| #  | Immon.   | a         | a*        | a <sup>0</sup> | b         | b*        | b <sup>0</sup> | d         | d'       | Seq. | v         | w         | w'        | y         | y*        |
|----|----------|-----------|-----------|----------------|-----------|-----------|----------------|-----------|----------|------|-----------|-----------|-----------|-----------|-----------|
| 1  | 101.1073 | 101.1073  | 84.0808   |                | 129.1022  | 112.0757  |                | 44.0495   |          | K    |           |           |           |           |           |
| 2  | 86.0964  | 214.1914  | 197.1648  |                | 242.1863  | 225.1598  |                | 172.1444  |          | L    | 2029.9145 | 2028.9192 |           | 2087.9927 | 2070.9662 |
| 3  | 102.0550 | 343.2340  | 326.2074  | 325.2234       | 371.2289  | 354.2023  | 353.2183       | 285.2285  |          | E    | 1900.8719 | 1899.8766 |           | 1974.9086 | 1957.8821 |
| 4  | 88.0393  | 458.2609  | 441.2344  | 440.2504       | 486.2558  | 469.2293  | 468.2453       | 414.2711  |          | D    | 1785.8449 | 1784.8497 |           | 1845.8661 | 1828.8395 |
| 5  | 86.0964  | 571.3450  | 554.3184  | 553.3344       | 599.3399  | 582.3134  | 581.3293       | 543.3137  | 557.3293 | I    | 1672.7609 | 1685.7813 | 1699.7969 | 1730.8391 | 1713.8126 |
| 6  | 72.0808  | 670.4134  | 653.3869  | 652.4028       | 698.4083  | 681.3818  | 680.3978       | 656.3978  |          | V    | 1573.6924 | 1586.7128 |           | 1617.7550 | 1600.7285 |
| 7  | 70.0651  | 767.4662  | 750.4396  | 749.4556       | 795.4611  | 778.4345  | 777.4505       | 741.4505  |          | P    | 1476.6397 | 1475.6444 |           | 1518.6866 | 1501.6601 |
| 8  | 60.0444  | 854.4982  | 837.4716  | 836.4876       | 882.4931  | 865.4666  | 864.4825       | 838.5033  |          | S    | 1389.6077 | 1388.6124 |           | 1421.6339 | 1404.6073 |
| 9  | 60.0444  | 941.5302  | 924.5037  | 923.5197       | 969.5251  | 952.4986  | 951.5146       | 925.5353  |          | S    | 1302.5756 | 1301.5804 |           | 1334.6018 | 1317.5753 |
| 10 | 110.0713 | 1078.5891 | 1061.5626 | 1060.5786      | 1106.5840 | 1089.5575 | 1088.5735      |           |          | H    | 1165.5167 |           |           | 1247.5698 | 1230.5433 |
| 11 | 87.0553  | 1192.6321 | 1175.6055 | 1174.6215      | 1220.6270 | 1203.6004 | 1202.6164      | 1149.6262 |          | N    | 1051.4738 | 1050.4785 |           | 1110.5109 | 1093.4844 |
| 12 | 133.0430 | 1352.6627 | 1335.6362 | 1334.6521      | 1380.6576 | 1363.6311 | 1362.6471      | 1263.6692 |          | C    | 891.4431  | 890.4479  |           | 996.4680  | 979.4414  |
| 13 | 88.0393  | 1467.6897 | 1450.6631 | 1449.6791      | 1495.6846 | 1478.6580 | 1477.6740      | 1423.6998 |          | D    | 776.4162  | 775.4209  |           | 836.4373  | 819.4108  |
| 14 | 72.0808  | 1566.7581 | 1549.7315 | 1548.7475      | 1594.7530 | 1577.7264 | 1576.7424      | 1552.7424 |          | V    | 677.3478  | 690.3682  |           | 721.4104  | 704.3838  |
| 15 | 70.0651  | 1663.8108 | 1646.7843 | 1645.8003      | 1691.8057 | 1674.7792 | 1673.7952      | 1637.7952 |          | P    | 580.2950  | 579.2998  |           | 622.3420  | 605.3154  |
| 16 | 110.0713 | 1800.8697 | 1783.8432 | 1782.8592      | 1828.8647 | 1811.8381 | 1810.8541      |           |          | H    | 443.2361  |           |           | 525.2892  | 508.2627  |
| 17 | 72.0808  | 1899.9382 | 1882.9116 | 1881.9276      | 1927.9331 | 1910.9065 | 1909.9225      | 1885.9225 |          | V    | 344.1677  | 357.1881  |           | 388.2303  | 371.2037  |
| 18 | 87.0553  | 2013.9811 | 1996.9545 | 1995.9705      | 2041.9760 | 2024.9495 | 2023.9654      | 1970.9753 |          | N    | 230.1248  | 229.1295  |           | 289.1619  | 272.1353  |
| 19 | 129.1135 |           |           |                |           |           |                |           |          | R    | 74.0237   | 73.0284   |           | 175.1190  | 158.0924  |

| Seq   | ya       | yb       | Seq    | ya       | yb       | Seq  | ya       | yb       |
|-------|----------|----------|--------|----------|----------|------|----------|----------|
| LE    | 215.1390 | 243.1339 | LED    | 330.1660 | 358.1609 | LEDI | 443.2500 | 471.2449 |
| LEDIV | 542.3184 | 570.3134 | LEDIVP | 639.3712 | 667.3661 | ED   | 217.0819 | 245.0768 |

|        |          |          |        |          |          |        |          |          |
|--------|----------|----------|--------|----------|----------|--------|----------|----------|
| EDI    | 330.1660 | 358.1609 | EDIV   | 429.2344 | 457.2293 | EDIVP  | 526.2871 | 554.2821 |
| EDIVPS | 613.3192 | 641.3141 | DI     | 201.1234 | 229.1183 | DIV    | 300.1918 | 328.1867 |
| DIVP   | 397.2445 | 425.2395 | DIVPS  | 484.2766 | 512.2715 | DIVPSS | 571.3086 | 599.3035 |
| IV     | 185.1648 | 213.1598 | IVP    | 282.2176 | 310.2125 | IVPS   | 369.2496 | 397.2445 |
| IVPSS  | 456.2817 | 484.2766 | IVPSSH | 593.3406 | 621.3355 | VP     | 169.1335 | 197.1285 |
| VPS    | 256.1656 | 284.1605 | VPSS   | 343.1976 | 371.1925 | VPSSH  | 480.2565 | 508.2514 |
| VPSSHN | 594.2994 | 622.2943 | PS     | 157.0972 | 185.0921 | PSS    | 244.1292 | 272.1241 |
| PSSH   | 381.1881 | 409.1830 | PSSHN  | 495.2310 | 523.2259 | PSSHNC | 655.2617 | 683.2566 |
| SS     | 147.0764 | 175.0713 | SSH    | 284.1353 | 312.1302 | SSHNC  | 398.1783 | 426.1732 |
| SSHNC  | 558.2089 | 586.2038 | SSHNCN | 673.2358 | 701.2308 | SH     | 197.1033 | 225.0982 |
| SHN    | 311.1462 | 339.1411 | SHNC   | 471.1769 | 499.1718 | SHNCD  | 586.2038 | 614.1987 |
| SHNCDV | 685.2722 | 713.2671 | HN     | 224.1142 | 252.1091 | HNC    | 384.1448 | 412.1398 |
| HNCD   | 499.1718 | 527.1667 | HNCDV  | 598.2402 | 626.2351 | HNCDVP | 695.2930 | 723.2879 |
| NC     | 247.0859 | 275.0809 | NCD    | 362.1129 | 390.1078 | NCDV   | 461.1813 | 489.1762 |
| NCDVP  | 558.2341 | 586.2290 | NCDVPH | 695.2930 | 723.2879 | CD     | 248.0700 | 276.0649 |
| CDV    | 347.1384 | 375.1333 | CDVP   | 444.1911 | 472.1860 | CDVPH  | 581.2500 | 609.2450 |
| CDVPHV | 680.3185 | 708.3134 | DV     | 187.1077 | 215.1026 | DVP    | 284.1605 | 312.1554 |
| DVPH   | 421.2194 | 449.2143 | DVPHV  | 520.2878 | 548.2827 | DVPHVN | 634.3307 | 662.3257 |
| VP     | 169.1335 | 197.1285 | VPH    | 306.1925 | 334.1874 | VPHV   | 405.2609 | 433.2558 |
| VPHVN  | 519.3038 | 547.2987 | PH     | 207.1240 | 235.1190 | PHV    | 306.1925 | 334.1874 |
| PHVN   | 420.2354 | 448.2303 | HV     | 209.1397 | 237.1346 | HVN    | 323.1826 | 351.1775 |
| VN     | 186.1237 | 214.1186 |        |          |          |        |          |          |

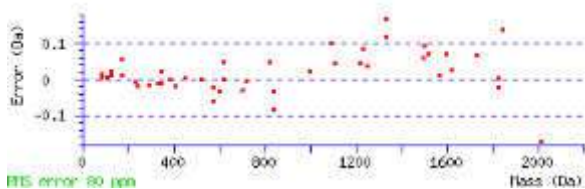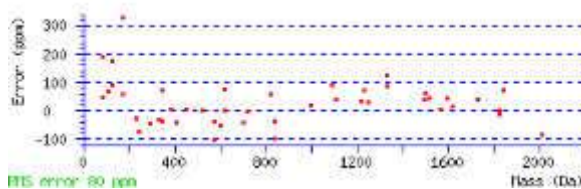

NCBI BLAST search of [KLEDIVPSSHNCVPHVNR](#)

(Parameters: blastp, nr protein database, expect=20000, no filter, PAM30)

Other BLAST [web gateways](#)

#### All matches to this query

| Score | Mr(calc)  | Delta  | Sequence                              |
|-------|-----------|--------|---------------------------------------|
| 74.9  | 2215.0804 | 0.1130 | <a href="#">KLEDIVPSSHNCVPHVNR</a>    |
| 23.0  | 2215.1848 | 0.0086 | <a href="#">NDQVVDIVLEDLAAVHQIPK</a>  |
| 17.4  | 2215.1233 | 0.0701 | <a href="#">HVGNDVYVLFKEOSSSSDR</a>   |
| 17.2  | 2215.0918 | 0.1016 | <a href="#">MEMTLFLNESYIEHRLR</a>     |
| 15.2  | 2215.1518 | 0.0416 | <a href="#">DLAAKGEVDTLVVALVDMOGR</a> |
| 14.8  | 2215.0914 | 0.1021 | <a href="#">MIMVGTMAITLWVIGWAMK</a>   |
| 14.3  | 2215.0651 | 0.1283 | <a href="#">QTIAHMSTLNORLESAEDR</a>   |
| 13.8  | 2215.1056 | 0.0879 | <a href="#">VHRMEDITWIPLVASTSR</a>    |
| 13.8  | 2215.0918 | 0.1016 | <a href="#">MEMTLFLNESYIEHRLR</a>     |
| 13.2  | 2215.1129 | 0.0805 | <a href="#">DIPHEKVMILECIFSIVNR</a>   |

Mascot: <http://www.matrixscience.com/>


**Mascot Search Results**
**Peptide View**      **Spot no 120**
**MS/MS Fragmentation of VTFLLDDAQVK**

 Found in **gi4239821** in **NCBI nr**, germin-like protein 1 [Oryza sativa]

Match to Query 115: 1134.630224 from(1135.637500,1+) intensity(0.0000) index(13)

Title: Label: G18, Spot\_Id: 219952, Peak\_List\_Id: 228894, MSMS Job\_Run\_Id: 22004, Comment:

Data file C:\Documents and Settings\Administrator\Desktop\Farah-Garima 11May 2013\ppw\_G18\_136868326500.txt

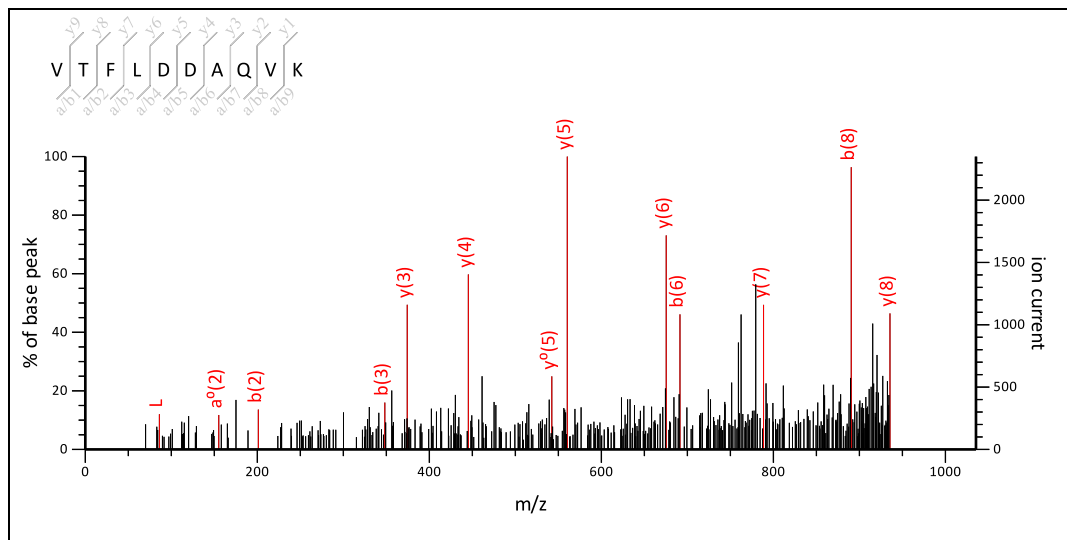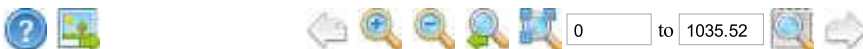
 Label all possible matches     Label matches used for scoring 
**Monoisotopic mass of neutral peptide Mr(calc):** 1134.5921

**Fixed modifications:** Carbamidomethyl (C) (apply to specified residues or termini only)

**Ions Score:** 41    **Expect:** 3.1

**Matches:** 15/146 fragment ions using 18 most intense peaks ([help](#))

| #  | Immon.   | a        | a*       | a <sup>0</sup> | b        | b*       | b <sup>0</sup> | d        | d'       | Seq. | v        | w         | w'        | y         | y*        | y <sup>0</sup> | #  |
|----|----------|----------|----------|----------------|----------|----------|----------------|----------|----------|------|----------|-----------|-----------|-----------|-----------|----------------|----|
| 1  | 72.0808  | 72.0808  |          |                | 100.0757 |          |                | 44.0495  |          | V    |          |           |           |           |           |                | 1  |
| 2  | 74.0600  | 173.1285 |          | 155.1179       | 201.1234 |          | 183.1128       | 157.1335 | 159.1128 | T    | 990.4891 | 1003.5095 | 1005.4888 | 1036.5310 | 1019.5044 | 1018.5204      | 2  |
| 3  | 120.0808 | 320.1969 |          | 302.1863       | 348.1918 |          | 330.1812       |          |          | F    | 843.4207 |           |           | 935.4833  | 918.4567  | 917.4727       | 3  |
| 4  | 86.0964  | 433.2809 |          | 415.2704       | 461.2758 |          | 443.2653       | 391.2340 |          | L    | 730.3366 | 729.3414  |           | 788.4149  | 771.3883  | 770.4043       | 4  |
| 5  | 88.0393  | 548.3079 |          | 530.2973       | 576.3028 |          | 558.2922       | 504.3180 |          | D    | 615.3097 | 614.3144  |           | 675.3308  | 658.3042  | 657.3202       | 5  |
| 6  | 88.0393  | 663.3348 |          | 645.3243       | 691.3297 |          | 673.3192       | 619.3450 |          | D    | 500.2827 | 499.2875  |           | 560.3039  | 543.2773  | 542.2933       | 6  |
| 7  | 44.0495  | 734.3719 |          | 716.3614       | 762.3668 |          | 744.3563       |          |          | A    | 429.2456 |           |           | 445.2769  | 428.2504  |                | 7  |
| 8  | 101.0709 | 862.4305 | 845.4040 | 844.4199       | 890.4254 | 873.3989 | 872.4149       | 805.4090 |          | Q    | 301.1870 | 300.1918  |           | 374.2398  | 357.2132  |                | 8  |
| 9  | 72.0808  | 961.4989 | 944.4724 | 943.4884       | 989.4938 | 972.4673 | 971.4833       | 947.4833 |          | V    | 202.1186 | 215.1390  |           | 246.1812  | 229.1547  |                | 9  |
| 10 | 101.1073 |          |          |                |          |          |                |          |          | K    | 74.0237  | 73.0284   |           | 147.1128  | 130.0863  |                | 10 |

| Seq    | ya       | yb       | Seq    | ya       | yb       | Seq    | ya       | yb       |
|--------|----------|----------|--------|----------|----------|--------|----------|----------|
| TF     | 221.1285 | 249.1234 | TFL    | 334.2125 | 362.2074 | TFLD   | 449.2395 | 477.2344 |
| TFLDD  | 564.2664 | 592.2613 | TFLDDA | 635.3035 | 663.2984 | FL     | 233.1648 | 261.1598 |
| FLD    | 348.1918 | 376.1867 | FLDD   | 463.2187 | 491.2136 | FLDDA  | 534.2558 | 562.2508 |
| FLDDAQ | 662.3144 | 690.3093 | LD     | 201.1234 | 229.1183 | LDD    | 316.1503 | 344.1452 |
| LDDA   | 387.1874 | 415.1823 | LDDAQ  | 515.2460 | 543.2409 | LDDAQV | 614.3144 | 642.3093 |
| DD     | 203.0662 | 231.0612 | DDA    | 274.1034 | 302.0983 | DDAQ   | 402.1619 | 430.1569 |
| DDAQV  | 501.2304 | 529.2253 | DA     | 159.0764 | 187.0713 | DAQ    | 287.1350 | 315.1299 |
| DAQV   | 386.2034 | 414.1983 | AQ     | 172.1081 | 200.1030 | AQV    | 271.1765 | 299.1714 |
| QV     | 200.1394 | 228.1343 |        |          |          |        |          |          |

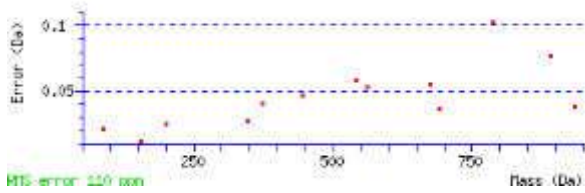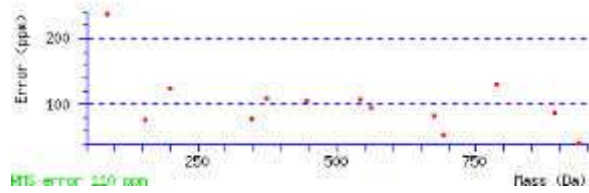

NCBI BLAST search of [VTFLDDAQVK](#)

(Parameters: blastp, nr protein database, expect=20000, no filter, PAM30)

Other BLAST [web gateways](#)

**All matches to this query**

| Score | Mr(calc)  | Delta   | Sequence                    |
|-------|-----------|---------|-----------------------------|
| 41.0  | 1134.5921 | 0.0381  | <a href="#">VTFLDDAQVK</a>  |
| 37.7  | 1134.5418 | 0.0884  | <a href="#">AEFIDDGGRR</a>  |
| 34.8  | 1134.5591 | 0.0711  | <a href="#">TVMPDSKVK</a>   |
| 33.9  | 1134.5855 | 0.0447  | <a href="#">YLPSVMAGAAR</a> |
| 32.1  | 1134.5306 | 0.0996  | <a href="#">TVFPDTGDGAR</a> |
| 32.0  | 1134.6219 | 0.0083  | <a href="#">IDFIAMAKAR</a>  |
| 30.4  | 1134.6761 | -0.0458 | <a href="#">LSLALYTKAR</a>  |
| 29.4  | 1134.5669 | 0.0633  | <a href="#">EAFTELAQOR</a>  |
| 29.1  | 1134.6067 | 0.0236  | <a href="#">SLLMDTTKAR</a>  |
| 29.1  | 1134.5404 | 0.0898  | <a href="#">LETEDDKSAK</a>  |

Mascot: <http://www.matrixscience.com/>


**Mascot Search Results**
**Peptide View**      **Spot no 120**
**MS/MS Fragmentation of VTFLLDDAQVKK**

 Found in **gi4239821** in **NCBItr**, germin-like protein 1 [Oryza sativa]

Match to Query 127: 1262.729324 from(1263.736600,1+) intensity(0.0000) index(16)

Title: Label: G18, Spot\_Id: 219952, Peak\_List\_Id: 228895, MSMS Job\_Run\_Id: 22004, Comment:

Data file C:\Documents and Settings\Administrator\Desktop\Farah-Garima 11May 2013\ppw\_G18\_136868326500.txt

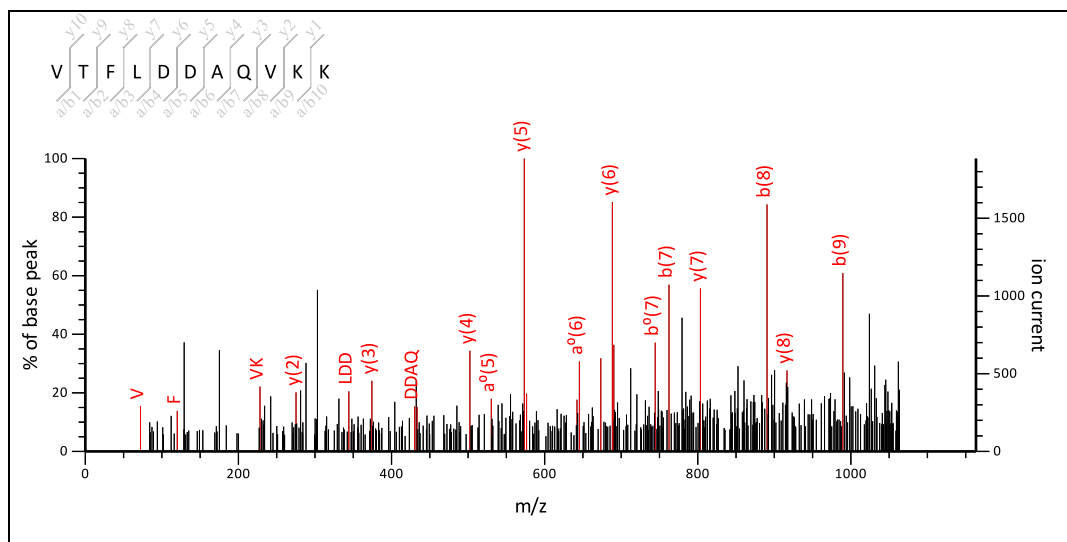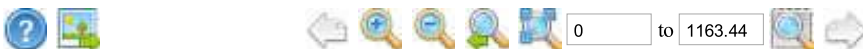
 Label all possible matches       Label matches used for scoring 
**Monoisotopic mass of neutral peptide Mr(calc):** 1262.6871

**Fixed modifications:** Carbamidomethyl (C) (apply to specified residues or termini only)

**Ions Score:** 33      **Expect:** 16

**Matches:** 27/168 fragment ions using 50 most intense peaks ([help](#))

| #  | Immon.   | a         | a*        | a <sup>0</sup> | b         | b*        | b <sup>0</sup> | d         | d'       | Seq. | v         | w         | w'        | y         | y*        |
|----|----------|-----------|-----------|----------------|-----------|-----------|----------------|-----------|----------|------|-----------|-----------|-----------|-----------|-----------|
| 1  | 72.0808  | 72.0808   |           |                | 100.0757  |           |                | 44.0495   |          | V    |           |           |           |           |           |
| 2  | 74.0600  | 173.1285  |           | 155.1179       | 201.1234  |           | 183.1128       | 157.1335  | 159.1128 | T    | 1118.5841 | 1131.6045 | 1133.5837 | 1164.6259 | 1147.5994 |
| 3  | 120.0808 | 320.1969  |           | 302.1863       | 348.1918  |           | 330.1812       |           |          | F    | 971.5156  |           |           | 1063.5782 | 1046.5517 |
| 4  | 86.0964  | 433.2809  |           | 415.2704       | 461.2758  |           | 443.2653       | 391.2340  |          | L    | 858.4316  | 857.4363  |           | 916.5098  | 899.4833  |
| 5  | 88.0393  | 548.3079  |           | 530.2973       | 576.3028  |           | 558.2922       | 504.3180  |          | D    | 743.4046  | 742.4094  |           | 803.4258  | 786.3992  |
| 6  | 88.0393  | 663.3348  |           | 645.3243       | 691.3297  |           | 673.3192       | 619.3450  |          | D    | 628.3777  | 627.3824  |           | 688.3988  | 671.3723  |
| 7  | 44.0495  | 734.3719  |           | 716.3614       | 762.3668  |           | 744.3563       |           |          | A    | 557.3406  |           |           | 573.3719  | 556.3453  |
| 8  | 101.0709 | 862.4305  | 845.4040  | 844.4199       | 890.4254  | 873.3989  | 872.4149       | 805.4090  |          | Q    | 429.2820  | 428.2867  |           | 502.3348  | 485.3082  |
| 9  | 72.0808  | 961.4989  | 944.4724  | 943.4884       | 989.4938  | 972.4673  | 971.4833       | 947.4833  |          | V    | 330.2136  | 343.2340  |           | 374.2762  | 357.2496  |
| 10 | 101.1073 | 1089.5939 | 1072.5673 | 1071.5833      | 1117.5888 | 1100.5623 | 1099.5782      | 1032.5360 |          | K    | 202.1186  | 201.1234  |           | 275.2078  | 258.1812  |
| 11 | 101.1073 |           |           |                |           |           |                |           |          | K    | 74.0237   | 73.0284   |           | 147.1128  | 130.0863  |

| Seq    | ya       | yb       | Seq    | ya       | yb       | Seq    | ya       | yb       |
|--------|----------|----------|--------|----------|----------|--------|----------|----------|
| TF     | 221.1285 | 249.1234 | TFL    | 334.2125 | 362.2074 | TFLD   | 449.2395 | 477.2344 |
| TFLDD  | 564.2664 | 592.2613 | TFLDDA | 635.3035 | 663.2984 | FL     | 233.1648 | 261.1598 |
| FLD    | 348.1918 | 376.1867 | FLDD   | 463.2187 | 491.2136 | FLDDA  | 534.2558 | 562.2508 |
| FLDDAQ | 662.3144 | 690.3093 | LD     | 201.1234 | 229.1183 | LDD    | 316.1503 | 344.1452 |
| LDDA   | 387.1874 | 415.1823 | LDDAQ  | 515.2460 | 543.2409 | LDDAQV | 614.3144 | 642.3093 |
| DD     | 203.0662 | 231.0612 | DDA    | 274.1034 | 302.0983 | DDAQ   | 402.1619 | 430.1569 |
| DDAQV  | 501.2304 | 529.2253 | DDAQVK | 629.3253 | 657.3202 | DA     | 159.0764 | 187.0713 |
| DAQ    | 287.1350 | 315.1299 | DAQV   | 386.2034 | 414.1983 | DAQVK  | 514.2984 | 542.2933 |
| AQ     | 172.1081 | 200.1030 | AQV    | 271.1765 | 299.1714 | AQVK   | 399.2714 | 427.2663 |
| QV     | 200.1394 | 228.1343 | QVK    | 328.2343 | 356.2292 | VK     | 200.1757 | 228.1707 |



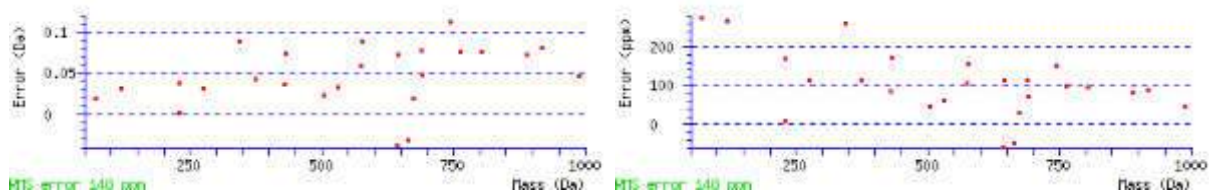

NCBI BLAST search of [VTFLDDAQVKK](#)

(Parameters: blastp, nr protein database, expect=20000, no filter, PAM30)

Other BLAST [web gateways](#)

**All matches to this query**

| Score | Mr(calc)  | Delta  | Sequence                     |
|-------|-----------|--------|------------------------------|
| 45.6  | 1262.6289 | 0.1004 | <a href="#">MTDVIDAKAQR</a>  |
| 35.7  | 1262.7234 | 0.0059 | <a href="#">IIFTTDAAKGVK</a> |
| 33.2  | 1262.6871 | 0.0423 | <a href="#">VTFLDDAQVKK</a>  |
| 33.0  | 1262.6255 | 0.1038 | <a href="#">VFEEADAKAQR</a>  |
| 32.1  | 1262.6077 | 0.1216 | <a href="#">ELMDSWKAAGR</a>  |
| 31.9  | 1262.6329 | 0.0964 | <a href="#">LPEGFMAEVVR</a>  |
| 31.8  | 1262.6448 | 0.0845 | <a href="#">QFILWDWQK</a>    |
| 31.6  | 1262.6077 | 0.1216 | <a href="#">ELMADWKAAGR</a>  |
| 28.8  | 1262.6363 | 0.0931 | <a href="#">MEKLMGPSVOK</a>  |
| 28.7  | 1262.6983 | 0.0311 | <a href="#">LFLSVSGEOKR</a>  |

Mascot: <http://www.matrixscience.com/>

**MATRIX SCIENCE Mascot Search Results**

**Peptide View Spot no 120**

MS/MS Fragmentation of **AAVTPAFVGQFPGVNGLGISAAR**

Found in **gi4239821** in **NCBI**nr, germin-like protein 1 [Oryza sativa]

Match to Query 150: 2199.290324 from(2200.297600,1+) intensity(0.0000) index(23)

Title: Label: G18, Spot\_Id: 219952, Peak\_List\_Id: 228893, MSMS Job\_Run\_Id: 22004, Comment:

Data file C:\Documents and Settings\Administrator\Desktop\Farah-Garima 11May 2013\ppw\_G18\_136868326500.txt

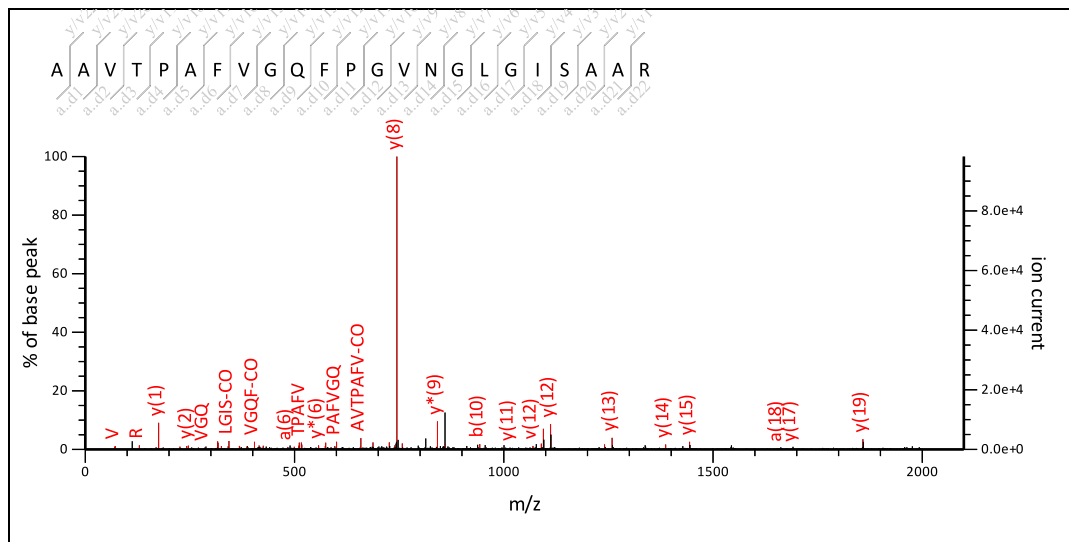

Navigation icons: Home, Back, Forward, Search, etc. Range: 0 to 2099.29

Label all possible matches  Label matches used for scoring

Monoisotopic mass of neutral peptide Mr(calc): 2199.1801  
 Fixed modifications: Carbamidomethyl (C) (apply to specified residues or termini only)  
 Ions Score: 77 Expect: 0.00032  
 Matches : 105/447 fragment ions using 160 most intense peaks (help)

| #  | Immon.   | a         | a*        | a <sup>0</sup> | b         | b*        | b <sup>0</sup> | d         | d'        | Seq. | v         | w         | w'        | y         | y*        |
|----|----------|-----------|-----------|----------------|-----------|-----------|----------------|-----------|-----------|------|-----------|-----------|-----------|-----------|-----------|
| 1  | 44.0495  | 44.0495   |           |                | 72.0444   |           |                | 44.0495   |           | A    |           |           |           |           |           |
| 2  | 44.0495  | 115.0866  |           |                | 143.0815  |           |                |           |           | A    | 2113.1189 |           |           | 2129.1502 | 2112.1237 |
| 3  | 72.0808  | 214.1550  |           |                | 242.1499  |           |                | 200.1394  |           | V    | 2014.0505 | 2027.0709 |           | 2058.1131 | 2041.0865 |
| 4  | 74.0600  | 315.2027  |           | 297.1921       | 343.1976  |           | 325.1870       | 299.2078  | 301.1870  | T    | 1913.0028 | 1926.0232 | 1928.0025 | 1959.0447 | 1942.0181 |
| 5  | 70.0651  | 412.2554  |           | 394.2449       | 440.2504  |           | 422.2398       | 386.2398  |           | P    | 1815.9500 | 1814.9548 |           | 1857.9970 | 1840.9704 |
| 6  | 44.0495  | 483.2926  |           | 465.2820       | 511.2875  |           | 493.2769       |           |           | A    | 1744.9129 |           |           | 1760.9442 | 1743.9177 |
| 7  | 120.0808 | 630.3610  |           | 612.3504       | 658.3559  |           | 640.3453       |           |           | F    | 1597.8445 |           |           | 1689.9071 | 1672.8806 |
| 8  | 72.0808  | 729.4294  |           | 711.4188       | 757.4243  |           | 739.4137       | 715.4137  |           | V    | 1498.7761 | 1511.7965 |           | 1542.8387 | 1525.8122 |
| 9  | 30.0338  | 786.4509  |           | 768.4403       | 814.4458  |           | 796.4352       |           |           | G    |           |           |           | 1443.7703 | 1426.7437 |
| 10 | 101.0709 | 914.5094  | 897.4829  | 896.4989       | 942.5043  | 925.4778  | 924.4938       | 857.4880  |           | Q    | 1313.6961 | 1312.7008 |           | 1386.7488 | 1369.7223 |
| 11 | 120.0808 | 1061.5778 | 1044.5513 | 1043.5673      | 1089.5728 | 1072.5462 | 1071.5622      |           |           | F    | 1166.6276 |           |           | 1258.6902 | 1241.6637 |
| 12 | 70.0651  | 1158.6306 | 1141.6041 | 1140.6200      | 1186.6255 | 1169.5990 | 1168.6150      | 1132.6150 |           | P    | 1069.5749 | 1068.5796 |           | 1111.6218 | 1094.5953 |
| 13 | 30.0338  | 1215.6521 | 1198.6255 | 1197.6415      | 1243.6470 | 1226.6204 | 1225.6364      |           |           | G    |           |           |           | 1014.5691 | 997.5425  |
| 14 | 72.0808  | 1314.7205 | 1297.6939 | 1296.7099      | 1342.7154 | 1325.6889 | 1324.7048      | 1300.7048 |           | V    | 913.4850  | 926.5054  |           | 957.5476  | 940.5211  |
| 15 | 87.0553  | 1428.7634 | 1411.7369 | 1410.7528      | 1456.7583 | 1439.7318 | 1438.7478      | 1385.7576 |           | N    | 799.4421  | 798.4468  |           | 858.4792  | 841.4526  |
| 16 | 30.0338  | 1485.7849 | 1468.7583 | 1467.7743      | 1513.7798 | 1496.7532 | 1495.7692      |           |           | G    |           |           |           | 744.4363  | 727.4097  |
| 17 | 86.0964  | 1598.8689 | 1581.8424 | 1580.8584      | 1626.8639 | 1609.8373 | 1608.8533      | 1556.8220 |           | L    | 629.3365  | 628.3413  |           | 687.4148  | 670.3883  |
| 18 | 30.0338  | 1655.8904 | 1638.8639 | 1637.8798      | 1683.8853 | 1666.8588 | 1665.8748      |           |           | G    |           |           |           | 574.3307  | 557.3042  |
| 19 | 86.0964  | 1768.9745 | 1751.9479 | 1750.9639      | 1796.9694 | 1779.9428 | 1778.9588      | 1740.9432 | 1754.9588 | I    | 459.2310  | 472.2514  | 486.2671  | 517.3093  | 500.2827  |
| 20 | 60.0444  | 1856.0065 | 1838.9799 | 1837.9959      | 1884.0014 | 1866.9749 | 1865.9908      | 1840.0116 |           | S    | 372.1990  | 371.2037  |           | 404.2252  | 387.1987  |
| 21 | 44.0495  | 1927.0436 | 1910.0171 | 1909.0330      | 1955.0385 | 1938.0120 | 1937.0280      |           |           | A    | 301.1619  |           |           | 317.1932  | 300.1666  |
| 22 | 44.0495  | 1998.0807 | 1981.0542 | 1980.0702      | 2026.0756 | 2009.0491 | 2008.0651      |           |           | A    | 230.1248  |           |           | 246.1561  | 229.1295  |
| 23 | 129.1135 |           |           |                |           |           |                |           |           | R    | 74.0237   | 73.0284   |           | 175.1190  | 158.0924  |

| Seq      | ya       | yb       | Seq      | ya       | yb       | Seq      | ya       | yb       |
|----------|----------|----------|----------|----------|----------|----------|----------|----------|
| AV       | 143.1179 | 171.1128 | AVT      | 244.1656 | 272.1605 | AVTP     | 341.2183 | 369.2132 |
| AVTPA    | 412.2554 | 440.2504 | AVTPAF   | 559.3239 | 587.3188 | AVTPAFV  | 658.3923 | 686.3872 |
| VT       | 173.1285 | 201.1234 | VTP      | 270.1812 | 298.1761 | VTPA     | 341.2183 | 369.2132 |
| VTPAF    | 488.2867 | 516.2817 | VTPAFV   | 587.3552 | 615.3501 | VTPAFVG  | 644.3766 | 672.3715 |
| TP       | 171.1128 | 199.1077 | TPA      | 242.1499 | 270.1448 | TPAF     | 389.2183 | 417.2132 |
| TPAFV    | 488.2867 | 516.2817 | TPAFVG   | 545.3082 | 573.3031 | TPAFVGQ  | 673.3668 | 701.3617 |
| PA       | 141.1022 | 169.0972 | PAF      | 288.1707 | 316.1656 | PAFV     | 387.2391 | 415.2340 |
| PAFVG    | 444.2605 | 472.2554 | PAFVGQ   | 572.3191 | 600.3140 | AF       | 191.1179 | 219.1128 |
| AFV      | 290.1863 | 318.1812 | AFVG     | 347.2078 | 375.2027 | AFVGQ    | 475.2663 | 503.2613 |
| AFVGQF   | 622.3348 | 650.3297 | FV       | 219.1492 | 247.1441 | FVG      | 276.1707 | 304.1656 |
| FVGQ     | 404.2292 | 432.2241 | FVGQF    | 551.2976 | 579.2926 | FVGQFP   | 648.3504 | 676.3453 |
| VG       | 129.1022 | 157.0972 | VGQ      | 257.1608 | 285.1557 | VGQF     | 404.2292 | 432.2241 |
| VGQFP    | 501.2820 | 529.2769 | VGQFPG   | 558.3035 | 586.2984 | VGQFPGV  | 657.3719 | 685.3668 |
| GQ       | 158.0924 | 186.0873 | GQF      | 305.1608 | 333.1557 | GQFP     | 402.2136 | 430.2085 |
| GQFPG    | 459.2350 | 487.2300 | GQFPGV   | 558.3035 | 586.2984 | GQFPGVN  | 672.3464 | 700.3413 |
| QF       | 248.1394 | 276.1343 | QFP      | 345.1921 | 373.1870 | QFPG     | 402.2136 | 430.2085 |
| QFPGV    | 501.2820 | 529.2769 | QFPGVN   | 615.3249 | 643.3198 | QFPGVNG  | 672.3464 | 700.3413 |
| FP       | 217.1335 | 245.1285 | FPG      | 274.1550 | 302.1499 | FPGV     | 373.2234 | 401.2183 |
| FPGVN    | 487.2663 | 515.2613 | FPGVNG   | 544.2878 | 572.2827 | FPGVNGL  | 657.3719 | 685.3668 |
| PG       | 127.0866 | 155.0815 | PGV      | 226.1550 | 254.1499 | PGVN     | 340.1979 | 368.1928 |
| PGVNG    | 397.2194 | 425.2143 | PGVNGL   | 510.3035 | 538.2984 | PGVNGLG  | 567.3249 | 595.3198 |
| PGVNGLGI | 680.4090 | 708.4039 | GV       | 129.1022 | 157.0972 | GVN      | 243.1452 | 271.1401 |
| GVNG     | 300.1666 | 328.1615 | GVNGL    | 413.2507 | 441.2456 | GVNGLG   | 470.2722 | 498.2671 |
| GVNGLGI  | 583.3562 | 611.3511 | GVNGLGIS | 670.3882 | 698.3832 | VN       | 186.1237 | 214.1186 |
| VNG      | 243.1452 | 271.1401 | VNGL     | 356.2292 | 384.2241 | VNGLG    | 413.2507 | 441.2456 |
| VNGLGI   | 526.3348 | 554.3297 | VNGLGIS  | 613.3668 | 641.3617 | VNGLGISA | 684.4039 | 712.3988 |
| NG       | 144.0768 | 172.0717 | NGL      | 257.1608 | 285.1557 | NGLG     | 314.1823 | 342.1772 |
| NGLGI    | 427.2663 | 455.2613 | NGLGIS   | 514.2984 | 542.2933 | NGLGISA  | 585.3355 | 613.3304 |
| NGLGISAA | 656.3726 | 684.3675 | GL       | 143.1179 | 171.1128 | GLG      | 200.1394 | 228.1343 |
| GLGI     | 313.2234 | 341.2183 | GLGIS    | 400.2554 | 428.2504 | GLGISA   | 471.2926 | 499.2875 |
| GLGISAA  | 542.3297 | 570.3246 | LG       | 143.1179 | 171.1128 | LGI      | 256.2020 | 284.1969 |
| LGIS     | 343.2340 | 371.2289 | LGISA    | 414.2711 | 442.2660 | LGISAA   | 485.3082 | 513.3031 |
| GI       | 143.1179 | 171.1128 | GIS      | 230.1499 | 258.1448 | GISA     | 301.1870 | 329.1819 |
| GISAA    | 372.2241 | 400.2191 | IS       | 173.1285 | 201.1234 | ISA      | 244.1656 | 272.1605 |
| ISAA     | 315.2027 | 343.1976 | SA       | 131.0815 | 159.0764 | SAA      | 202.1186 | 230.1135 |
| AA       | 115.0866 | 143.0815 |          |          |          |          |          |          |

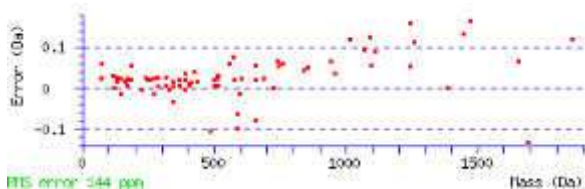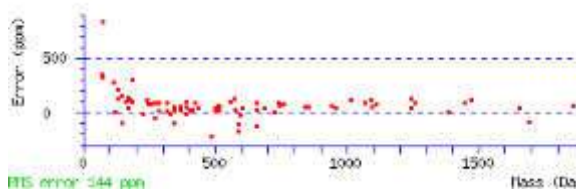

NCBI BLAST search of [AAVTPAFVGOFPGVNGLGISAAR](#)  
 (Parameters: blastp, nr protein database, expect=20000, no filter, PAM30)  
 Other BLAST [web gateways](#)

All matches to this query

| Score | Mr(calc)  | Delta  | Sequence                                |
|-------|-----------|--------|-----------------------------------------|
| 76.9  | 2199.1801 | 0.1103 | <a href="#">AAVTPAFVGOFPGVNGLGISAAR</a> |
| 27.2  | 2199.1800 | 0.1103 | <a href="#">AAVTPAFAAQFPGLNGLGLSAAR</a> |
| 18.2  | 2199.1746 | 0.1157 | <a href="#">SNLSAAIDDVDKIIDLLSAAR</a>   |
| 18.2  | 2199.2164 | 0.0739 | <a href="#">IOTWOATIWLASGLKTAVGR</a>    |
| 15.8  | 2199.0920 | 0.1984 | <a href="#">LISDIDERNATLSNEWAPR</a>     |

|      |           |        |                                       |
|------|-----------|--------|---------------------------------------|
| 15.0 | 2199.1106 | 0.1797 | <a href="#">INDAMGHAVGDDEFKIVTOR</a>  |
| 14.3 | 2199.1430 | 0.1473 | <a href="#">GMVEAGLITRDDVSVGTRPAR</a> |
| 14.2 | 2199.1800 | 0.1103 | <a href="#">ELAFVPDAVVHYQLRSTVR</a>   |
| 14.1 | 2199.1131 | 0.1772 | <a href="#">NOAETISEQKAOETPVTGIR</a>  |
| 13.2 | 2199.1933 | 0.0970 | <a href="#">IEPLGMTGAGGLEILAKVTGR</a> |

Mascot: <http://www.matrixscience.com/>



# Mascot Search Results

## Peptide View **Spot no 125**

### MS/MS Fragmentation of **IGINGFGR**

Found in **gi968996** in **NCBI nr**, glyceraldehyde-3-phosphate dehydrogenase [*Oryza sativa*]

Match to Query 5: 833.447684 from(834.454960,1+) intensity(0.0000) index(1)

Title: Label: P10, Spot\_Id: 216636, Peak\_List\_Id: 221672, MSMS Job\_Run\_Id: 21387, Comment:

Data file C:\Documents and Settings\Administrator\Desktop\farah BHU\Cotton leaves\RAJESH\12-1-13 raj\ppw\_P10\_136117687500.txt

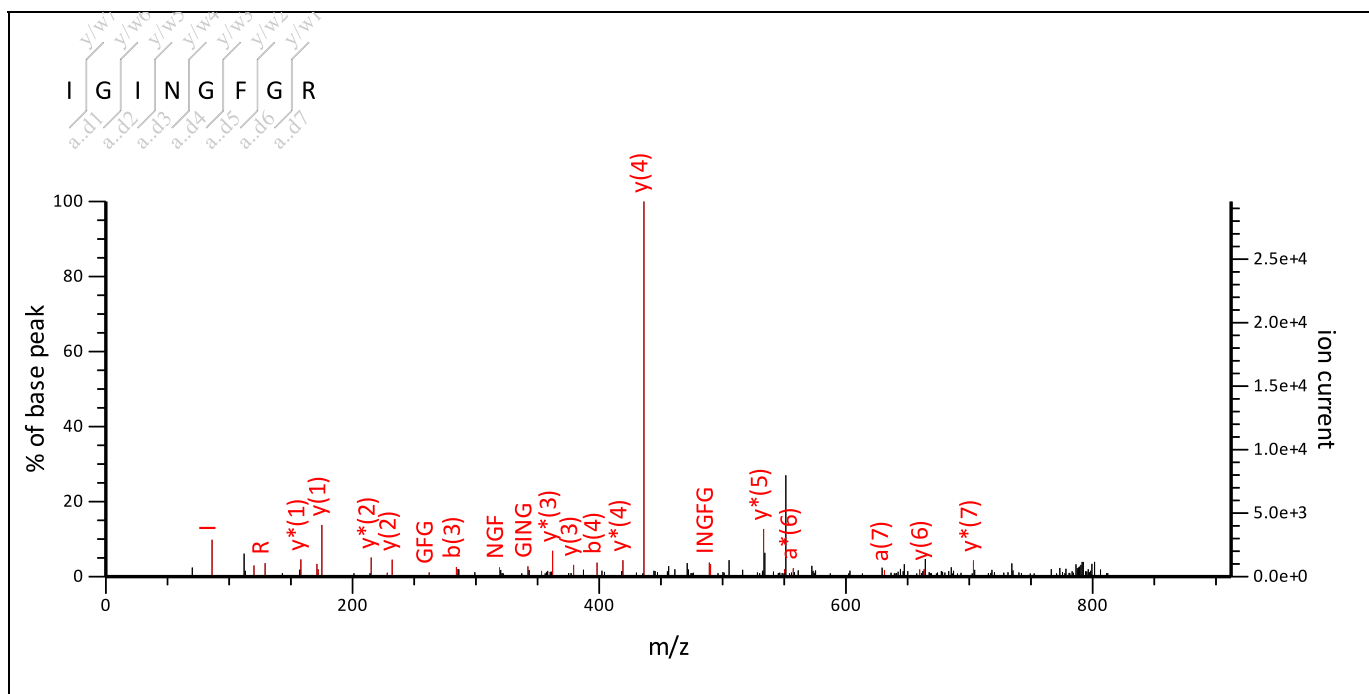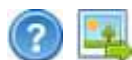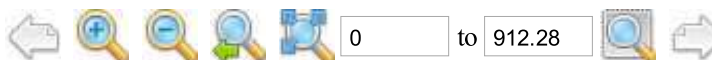

Label all possible matches  Label matches used for scoring

**Monoisotopic mass of neutral peptide Mr(calc):** 832.4555

**Fixed modifications:** Carbamidomethyl (C) (apply to specified residues or termini only)

**Ions Score:** 28 **Expect:** 11

**Matches :** 40/86 fragment ions using 72 most intense peaks ([help](#))

| # | Immon.   | a        | a*       | b        | b*       | d        | d'       | Seq. | v        | w        | w'       | y        | y*       | # |
|---|----------|----------|----------|----------|----------|----------|----------|------|----------|----------|----------|----------|----------|---|
| 1 | 86.0964  | 86.0964  |          | 114.0913 |          | 44.0495  |          | I    |          |          |          |          |          | 8 |
| 2 | 30.0338  | 143.1179 |          | 171.1128 |          |          |          | G    |          |          |          | 720.3787 | 703.3522 | 7 |
| 3 | 86.0964  | 256.2020 |          | 284.1969 |          | 228.1707 | 242.1863 | I    | 605.2790 | 618.2994 | 632.3151 | 663.3573 | 646.3307 | 6 |
| 4 | 87.0553  | 370.2449 | 353.2183 | 398.2398 | 381.2132 | 327.2391 |          | N    | 491.2361 | 490.2409 |          | 550.2732 | 533.2467 | 5 |
| 5 | 30.0338  | 427.2663 | 410.2398 | 455.2613 | 438.2347 |          |          | G    |          |          |          | 436.2303 | 419.2037 | 4 |
| 6 | 120.0808 | 574.3348 | 557.3082 | 602.3297 | 585.3031 |          |          | F    | 287.1462 |          |          | 379.2088 | 362.1823 | 3 |
| 7 | 30.0338  | 631.3562 | 614.3297 | 659.3511 | 642.3246 |          |          | G    |          |          |          | 232.1404 | 215.1139 | 2 |
| 8 | 129.1135 |          |          |          |          |          |          | R    | 74.0237  | 73.0284  |          | 175.1190 | 158.0924 | 1 |

| Seq | ya       | yb       | Seq | ya       | yb       | Seq  | ya       | yb       |
|-----|----------|----------|-----|----------|----------|------|----------|----------|
| GI  | 143.1179 | 171.1128 | GIN | 257.1608 | 285.1557 | GING | 314.1823 | 342.1772 |

|              |          |          |               |          |          |              |          |          |
|--------------|----------|----------|---------------|----------|----------|--------------|----------|----------|
| <b>GINGF</b> | 461.2507 | 489.2456 | <b>GINGFG</b> | 518.2722 | 546.2671 | <b>IN</b>    | 200.1394 | 228.1343 |
| <b>ING</b>   | 257.1608 | 285.1557 | <b>INGF</b>   | 404.2292 | 432.2241 | <b>INGFG</b> | 461.2507 | 489.2456 |
| <b>NG</b>    | 144.0768 | 172.0717 | <b>NGF</b>    | 291.1452 | 319.1401 | <b>NGFG</b>  | 348.1666 | 376.1615 |
| <b>GF</b>    | 177.1022 | 205.0972 | <b>GFG</b>    | 234.1237 | 262.1186 | <b>FG</b>    | 177.1022 | 205.0972 |

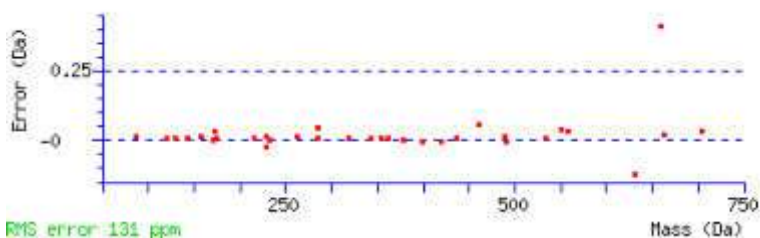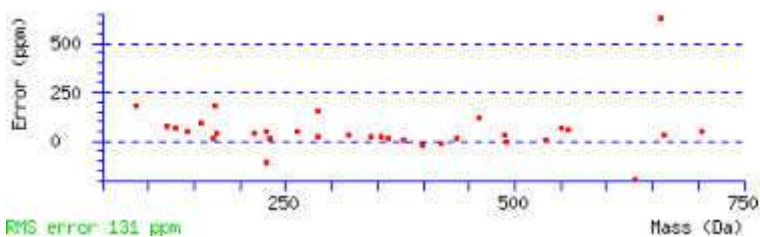

NCBI **BLAST** search of [IGINGFGR](#)

(Parameters: blastp, nr protein database, expect=20000, no filter, PAM30)

Other BLAST [web gateways](#)

#### All matches to this query

| Score | Mr(calc) | Delta   | Sequence                   |
|-------|----------|---------|----------------------------|
| 35.8  | 832.4555 | 0.9921  | <a href="#">VAINGFGR</a>   |
| 31.4  | 833.4065 | 0.0411  | <a href="#">GILDTCR</a>    |
| 31.4  | 833.4395 | 0.0081  | <a href="#">IGLDFNR</a>    |
| 29.6  | 833.4396 | 0.0081  | <a href="#">VADLGFGR</a>   |
| 28.4  | 832.4555 | 0.9921  | <a href="#">IGINGFGR</a>   |
| 28.1  | 834.3984 | -0.9507 | <a href="#">GNIDFNR</a>    |
| 27.7  | 832.4555 | 0.9921  | <a href="#">LGINGFGR</a>   |
| 27.2  | 833.4256 | 0.0220  | <a href="#">QRGGGFGR</a>   |
| 26.6  | 834.4195 | -0.9719 | <a href="#">TSNTLSGR</a>   |
| 25.9  | 833.4144 | 0.0333  | <a href="#">IGGGGFGGGR</a> |

Mascot: <http://www.matrixscience.com/>


**Mascot Search Results**
**Peptide View**      **Spot no 125**
MS/MS Fragmentation of **TVDGPSSKDWR**Found in **gi968996** in **NCBI nr**, glyceraldehyde-3-phosphate dehydrogenase [*Oryza sativa*]

Match to Query 25: 1246.611824 from(1247.619100,1+) intensity(0.0000) index(7)

Title: Label: P10, Spot\_Id: 216636, Peak\_List\_Id: 221687, MSMS Job\_Run\_Id: 21387, Comment:

Data file C:\Documents and Settings\Administrator\Desktop\farah BHU\Cotton leaves\RAJESH\12-1-13 raj\ppw\_P10\_136117687500.txt

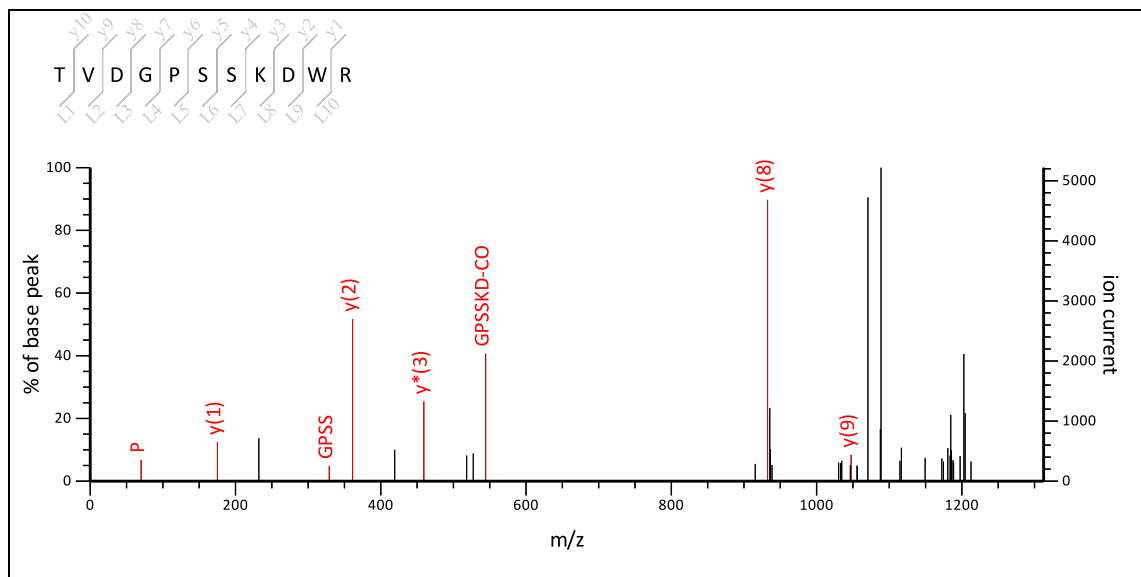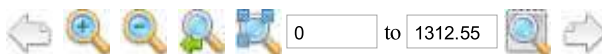Label all possible matches  Label matches used for scoring Monoisotopic mass of neutral peptide  $M_r(\text{calc})$ : 1246.5942

Fixed modifications: Carbamidomethyl (C) (apply to specified residues or termini only)

Ions Score: 16 Expect: 1.7e+02

Matches : 11/173 fragment ions using 17 most intense peaks ([help](#))

| #  | Immon.   | a         | a*        | a <sup>0</sup> | b         | b*        | b <sup>0</sup> | d        | Seq. | v         | w         | y         | y*        | y <sup>0</sup> | #  |
|----|----------|-----------|-----------|----------------|-----------|-----------|----------------|----------|------|-----------|-----------|-----------|-----------|----------------|----|
| 1  | 74.0600  | 74.0600   |           | 56.0495        | 102.0550  |           | 84.0444        | 44.0495  | T    |           |           |           |           |                | 11 |
| 2  | 72.0808  | 173.1285  |           | 155.1179       | 201.1234  |           | 183.1128       | 159.1128 | V    | 1102.4912 | 1115.5116 | 1146.5538 | 1129.5273 | 1128.5432      | 10 |
| 3  | 88.0393  | 288.1554  |           | 270.1448       | 316.1503  |           | 298.1397       | 244.1656 | D    | 987.4643  | 986.4690  | 1047.4854 | 1030.4588 | 1029.4748      | 9  |
| 4  | 30.0338  | 345.1769  |           | 327.1663       | 373.1718  |           | 355.1612       |          | G    |           |           | 932.4585  | 915.4319  | 914.4479       | 8  |
| 5  | 70.0651  | 442.2296  |           | 424.2191       | 470.2245  |           | 452.2140       | 416.2140 | P    | 833.3900  | 832.3948  | 875.4370  | 858.4104  | 857.4264       | 7  |
| 6  | 60.0444  | 529.2617  |           | 511.2511       | 557.2566  |           | 539.2460       | 513.2667 | S    | 746.3580  | 745.3628  | 778.3842  | 761.3577  | 760.3737       | 6  |
| 7  | 60.0444  | 616.2937  |           | 598.2831       | 644.2886  |           | 626.2780       | 600.2988 | S    | 659.3260  | 658.3307  | 691.3522  | 674.3256  | 673.3416       | 5  |
| 8  | 101.1073 | 744.3886  | 727.3621  | 726.3781       | 772.3836  | 755.3570  | 754.3730       | 687.3308 | K    | 531.2310  | 530.2358  | 604.3202  | 587.2936  | 586.3096       | 4  |
| 9  | 88.0393  | 859.4156  | 842.3890  | 841.4050       | 887.4105  | 870.3840  | 869.3999       | 815.4258 | D    | 416.2041  | 415.2088  | 476.2252  | 459.1987  | 458.2146       | 3  |
| 10 | 159.0917 | 1045.4949 | 1028.4684 | 1027.4843      | 1073.4898 | 1056.4633 | 1055.4792      |          | W    | 230.1248  |           | 361.1983  | 344.1717  |                | 2  |
| 11 | 129.1135 |           |           |                |           |           |                |          | R    | 74.0237   | 73.0284   | 175.1190  | 158.0924  |                | 1  |

| Seq   | ya       | yb       | Seq    | ya       | yb       | Seq     | ya       | yb       |
|-------|----------|----------|--------|----------|----------|---------|----------|----------|
| VD    | 187.1077 | 215.1026 | VDG    | 244.1292 | 272.1241 | VDGP    | 341.1819 | 369.1769 |
| VDGPS | 428.2140 | 456.2089 | VDGPSS | 515.2460 | 543.2409 | VDGPSSK | 643.3410 | 671.3359 |
| DG    | 145.0608 | 173.0557 | DGP    | 242.1135 | 270.1084 | DGPS    | 329.1456 | 357.1405 |
| DGPSS | 416.1776 | 444.1725 | DGPSSK | 544.2726 | 572.2675 | DGPSSKD | 659.2995 | 687.2944 |
| GP    | 127.0866 | 155.0815 | GPS    | 214.1186 | 242.1135 | GPSS    | 301.1506 | 329.1456 |
| GPSSK | 429.2456 | 457.2405 | GPSSKD | 544.2726 | 572.2675 | PS      | 157.0972 | 185.0921 |



|                        |          |          |                       |          |                          |                       |          |          |
|------------------------|----------|----------|-----------------------|----------|--------------------------|-----------------------|----------|----------|
| <a href="#">PSS</a>    | 244.1292 | 272.1241 | <a href="#">PSSK</a>  | 372.2241 | 400.2191                 | <a href="#">PSSKD</a> | 487.2511 | 515.2460 |
| <a href="#">PSSKDW</a> | 673.3304 | 701.3253 | <a href="#">SS</a>    | 147.0764 | <a href="#">175.0713</a> | <a href="#">SSK</a>   | 275.1714 | 303.1663 |
| <a href="#">SSKD</a>   | 390.1983 | 418.1932 | <a href="#">SSKDW</a> | 576.2776 | 604.2726                 | <a href="#">SK</a>    | 188.1394 | 216.1343 |
| <a href="#">SKD</a>    | 303.1663 | 331.1612 | <a href="#">SKDW</a>  | 489.2456 | 517.2405                 | <a href="#">KD</a>    | 216.1343 | 244.1292 |
| <a href="#">KDW</a>    | 402.2136 | 430.2085 | <a href="#">DW</a>    | 274.1186 | 302.1135                 |                       |          |          |

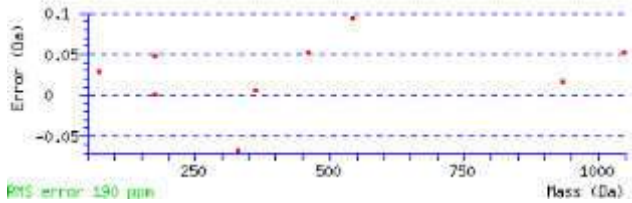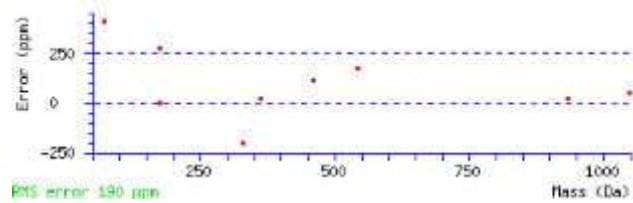

NCBI BLAST search of [TVDPSSKDWR](#)

(Parameters: blastp, nr protein database, expect=20000, no filter, PAM30)

Other BLAST [web gateways](#)

#### All matches to this query

| Score | Mr(calc)  | Delta   | Sequence                      |
|-------|-----------|---------|-------------------------------|
| 19.6  | 1246.6895 | -0.0776 | <a href="#">RQVLHPEAVGGR</a>  |
| 16.8  | 1247.6445 | -1.0326 | <a href="#">VDVMISRWR</a>     |
| 16.2  | 1245.5884 | 1.0234  | <a href="#">TGRMGSPQADAR</a>  |
| 15.6  | 1247.5378 | -0.9260 | <a href="#">VDADTDAASNGGR</a> |
| 15.6  | 1246.5942 | 0.0176  | <a href="#">TVDPSSKDWR</a>    |
| 15.6  | 1246.5942 | 0.0176  | <a href="#">TVDPSSKDWR</a>    |
| 15.6  | 1246.5578 | 0.0540  | <a href="#">TVDPSSQDWR</a>    |
| 15.5  | 1247.5201 | -0.9083 | <a href="#">CGVAEGGDGDVGR</a> |
| 15.3  | 1247.5717 | -0.9599 | <a href="#">MOEFSSHLNR</a>    |
| 14.9  | 1245.5997 | 1.0122  | <a href="#">TGRGGCGGALQR</a>  |

Mascot: <http://www.matrixscience.com/>

**MATRIX SCIENCE Mascot Search Results**

**Peptide View Spot no 125**

MS/MS Fragmentation of **TLLLGEKPVTVFGIR**

Found in **gi968996** in **NCBInr**, glyceraldehyde-3-phosphate dehydrogenase [Oryza sativa]

Match to Query 43: 1641.998624 from(1643.005900,1+) intensity(0.0000) index(13)

Title: Label: P10, Spot\_Id: 216636, Peak\_List\_Id: 221664, MSMS Job\_Run\_Id: 21387, Comment:

Data file C:\Documents and Settings\Administrator\Desktop\farah BHU\Cotton leaves\RAJESH\12-1-13 raj\ppw\_P10\_136117687500.txt

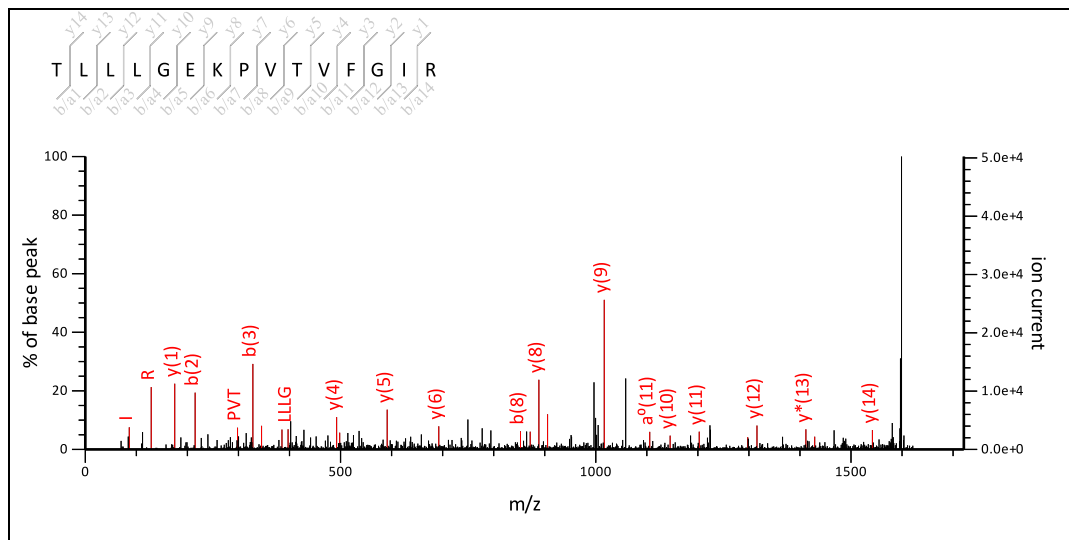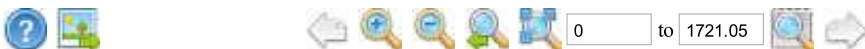

Label all possible matches  Label matches used for scoring

Monoisotopic mass of neutral peptide Mr(calc): 1641.9818

Fixed modifications: Carbamidomethyl (C) (apply to specified residues or termini only)

Ions Score: 79 Expect: 5.1e-05

Matches : 32/265 fragment ions using 48 most intense peaks [\(help\)](#)

| #  | Immon.          | a         | a*        | a <sup>0</sup>   | b               | b*        | b <sup>0</sup> | d         | d'        | Seq. | v         | w         | w'       | y                | y*              |
|----|-----------------|-----------|-----------|------------------|-----------------|-----------|----------------|-----------|-----------|------|-----------|-----------|----------|------------------|-----------------|
| 1  | 74.0600         | 74.0600   |           | 56.0495          | 102.0550        |           | 84.0444        | 44.0495   |           | T    |           |           |          |                  |                 |
| 2  | 86.0964         | 187.1441  |           | 169.1335         | <b>215.1390</b> |           | 197.1285       | 145.0972  |           | L    | 1483.8631 | 1482.8679 |          | <b>1541.9414</b> | 1524.9148       |
| 3  | 86.0964         | 300.2282  |           | 282.2176         | <b>328.2231</b> |           | 310.2125       | 258.1812  |           | L    | 1370.7791 | 1369.7838 |          | <b>1428.8573</b> | 1411.8308       |
| 4  | 86.0964         | 413.3122  |           | 395.3017         | 441.3071        |           | 423.2966       | 371.2653  |           | L    | 1257.6950 | 1256.6997 |          | <b>1315.7732</b> | 1298.7467       |
| 5  | 30.0338         | 470.3337  |           | 452.3231         | <b>498.3286</b> |           | 480.3180       |           |           | G    |           |           |          | <b>1202.6892</b> | 1185.6626       |
| 6  | 102.0550        | 599.3763  |           | 581.3657         | 627.3712        |           | 609.3606       | 541.3708  |           | E    | 1071.6309 | 1070.6357 |          | <b>1145.6677</b> | 1128.6412       |
| 7  | 101.1073        | 727.4713  | 710.4447  | 709.4607         | 755.4662        | 738.4396  | 737.4556       | 670.4134  |           | K    | 943.5360  | 942.5407  |          | <b>1016.6251</b> | 999.5986        |
| 8  | 70.0651         | 824.5240  | 807.4975  | 806.5135         | <b>852.5189</b> | 835.4924  | 834.5084       | 798.5084  |           | P    | 846.4832  | 845.4880  |          | <b>888.5302</b>  | 871.5036        |
| 9  | 72.0808         | 923.5924  | 906.5659  | <b>905.5819</b>  | 951.5873        | 934.5608  | 933.5768       | 909.5768  |           | V    | 747.4148  | 760.4352  |          | 791.4774         | 774.4509        |
| 10 | 74.0600         | 1024.6401 | 1007.6136 | 1006.6295        | 1052.6350       | 1035.6085 | 1034.6245      | 1008.6452 | 1010.6245 | T    | 646.3671  | 659.3875  | 661.3668 | <b>692.4090</b>  | 675.3824        |
| 11 | 72.0808         | 1123.7085 | 1106.6820 | <b>1105.6980</b> | 1151.7034       | 1134.6769 | 1133.6929      | 1109.6929 |           | V    | 547.2987  | 560.3191  |          | <b>591.3613</b>  | 574.3348        |
| 12 | 120.0808        | 1270.7769 | 1253.7504 | 1252.7664        | 1298.7719       | 1281.7453 | 1280.7613      |           |           | F    | 400.2303  |           |          | <b>492.2929</b>  | 475.2663        |
| 13 | 30.0338         | 1327.7984 | 1310.7719 | 1309.7878        | 1355.7933       | 1338.7668 | 1337.7828      |           |           | G    |           |           |          | <b>345.2245</b>  | <b>328.1979</b> |
| 14 | 86.0964         | 1440.8825 | 1423.8559 | 1422.8719        | 1468.8774       | 1451.8508 | 1450.8668      | 1412.8512 | 1426.8668 | I    | 230.1248  | 243.1452  | 257.1608 | 288.2030         | 271.1765        |
| 15 | <b>129.1135</b> |           |           |                  |                 |           |                |           |           | R    | 74.0237   | 73.0284   |          | <b>175.1190</b>  | 158.0924        |

| Seq    | ya              | yb       | Seq    | ya              | yb       | Seq    | ya       | yb              |
|--------|-----------------|----------|--------|-----------------|----------|--------|----------|-----------------|
| LL     | 199.1805        | 227.1754 | LLL    | 312.2646        | 340.2595 | LLG    | 369.2860 | <b>397.2809</b> |
| LLLGE  | <b>498.3286</b> | 526.3235 | LLLGEK | 626.4236        | 654.4185 | LL     | 199.1805 | 227.1754        |
| LLG    | 256.2020        | 284.1969 | LLGE   | <b>385.2445</b> | 413.2395 | LLGEK  | 513.3395 | 541.3344        |
| LLGEKP | 610.3923        | 638.3872 | LG     | 143.1179        | 171.1128 | LGE    | 272.1605 | 300.1554        |
| LGEK   | 400.2554        | 428.2504 | LGEKP  | 497.3082        | 525.3031 | LGEKPV | 596.3766 | 624.3715        |
| LGEKPV | 697.4243        | 725.4192 | GE     | 159.0764        | 187.0713 | GEK    | 287.1714 | 315.1663        |

|                         |          |                          |                         |          |                          |                        |          |          |
|-------------------------|----------|--------------------------|-------------------------|----------|--------------------------|------------------------|----------|----------|
| <a href="#">GKGP</a>    | 384.2241 | 412.2191                 | <a href="#">GKGPV</a>   | 483.2926 | 511.2875                 | <a href="#">GKGPVT</a> | 584.3402 | 612.3352 |
| <a href="#">GKGPVTV</a> | 683.4087 | 711.4036                 | <a href="#">EK</a>      | 230.1499 | 258.1448                 | <a href="#">EKP</a>    | 327.2027 | 355.1976 |
| <a href="#">EKPV</a>    | 426.2711 | 454.2660                 | <a href="#">EKPVT</a>   | 527.3188 | 555.3137                 | <a href="#">EKPVTV</a> | 626.3872 | 654.3821 |
| <a href="#">KP</a>      | 198.1601 | 226.1550                 | <a href="#">KPV</a>     | 297.2285 | 325.2234                 | <a href="#">KPVTV</a>  | 398.2762 | 426.2711 |
| <a href="#">KPVTV</a>   | 497.3446 | 525.3395                 | <a href="#">KPVTVF</a>  | 644.4130 | 672.4079                 | <a href="#">PV</a>     | 169.1335 | 197.1285 |
| <a href="#">PVT</a>     | 270.1812 | <a href="#">298.1761</a> | <a href="#">PVTV</a>    | 369.2496 | <a href="#">397.2445</a> | <a href="#">PVTVF</a>  | 516.3180 | 544.3130 |
| <a href="#">PVTVFG</a>  | 573.3395 | 601.3344                 | <a href="#">PVTVFGI</a> | 686.4236 | 714.4185                 | <a href="#">VT</a>     | 173.1285 | 201.1234 |
| <a href="#">VTV</a>     | 272.1969 | 300.1918                 | <a href="#">VTVF</a>    | 419.2653 | 447.2602                 | <a href="#">VTVFG</a>  | 476.2867 | 504.2817 |
| <a href="#">VTVFGI</a>  | 589.3708 | 617.3657                 | <a href="#">TV</a>      | 173.1285 | 201.1234                 | <a href="#">TVF</a>    | 320.1969 | 348.1918 |
| <a href="#">TVFG</a>    | 377.2183 | 405.2132                 | <a href="#">TVFGI</a>   | 490.3024 | 518.2973                 | <a href="#">VF</a>     | 219.1492 | 247.1441 |
| <a href="#">VFG</a>     | 276.1707 | 304.1656                 | <a href="#">VFGI</a>    | 389.2547 | 417.2496                 | <a href="#">FG</a>     | 177.1022 | 205.0972 |
| <a href="#">FGI</a>     | 290.1863 | 318.1812                 | <a href="#">GI</a>      | 143.1179 | 171.1128                 |                        |          |          |

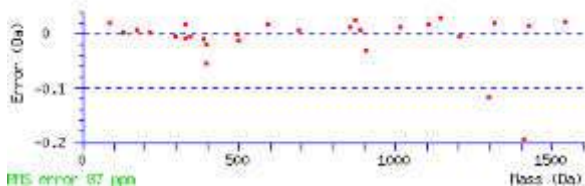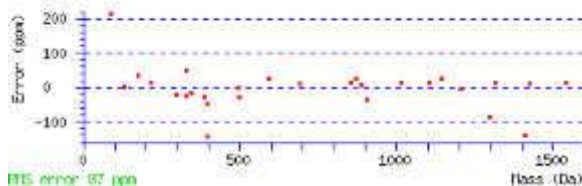

NCBI BLAST search of [TLLLGEKPVTVFGIR](#)

(Parameters: blastp, nr protein database, expect=20000, no filter, PAM30)

Other BLAST [web gateways](#)

#### All matches to this query

| Score | Mr(calc)  | Delta   | Sequence                         |
|-------|-----------|---------|----------------------------------|
| 79.0  | 1641.9818 | 0.0168  | <a href="#">TLLLGEKPVTVFGIR</a>  |
| 19.1  | 1642.7991 | -0.8005 | <a href="#">LTSASPYGWL PDSHL</a> |
| 15.7  | 1641.8508 | 0.1478  | <a href="#">VDLVALSGSHTIGMAR</a> |
| 13.0  | 1642.9076 | -0.9090 | <a href="#">TISIVDVPAGKAMLGR</a> |
| 13.0  | 1642.9076 | -0.9090 | <a href="#">TISIVDVPAGKAMLGR</a> |
| 12.1  | 1642.9406 | -0.9420 | <a href="#">ITLLTRSAWLAEAAK</a>  |
| 11.6  | 1641.9202 | 0.0784  | <a href="#">SAKNPVIAGAGL FER</a> |
| 11.4  | 1641.7417 | 0.2570  | <a href="#">TGDAGASDLYTMERR</a>  |
| 11.3  | 1641.9202 | 0.0784  | <a href="#">LLTPSLNLLHQHEK</a>   |
| 11.1  | 1641.8151 | 0.1835  | <a href="#">KPYFEEDKGGFLGR</a>   |

Mascot: <http://www.matrixscience.com/>

**MATRIX SCIENCE Mascot Search Results**

**Peptide View Spot no 125**

MS/MS Fragmentation of **LVAWYDNEWGYSNR**

Found in **gi968996** in **NCBI nr**, glyceraldehyde-3-phosphate dehydrogenase [Oryza sativa]

Match to Query 52: 1771.824924 from(1772.832200,1+) intensity(0.0000) index(17)

Title: Label: P10, Spot\_Id: 216636, Peak\_List\_Id: 221661, MSMS Job\_Run\_Id: 21387, Comment:

Data file C:\Documents and Settings\Administrator\Desktop\farah BHU\Cotton leaves\RAJESH\12-1-13 raj\ppw\_P10\_136117687500.txt

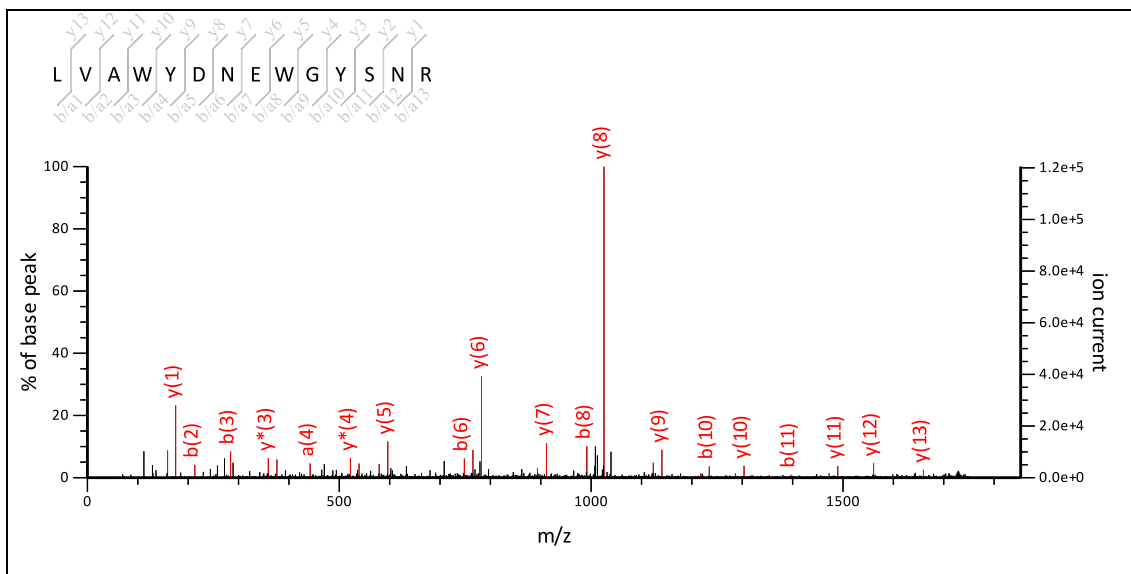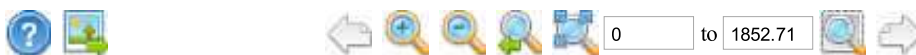

Label all possible matches  Label matches used for scoring

**Monoisotopic mass of neutral peptide Mr(calc):** 1771.7954

**Fixed modifications:** Carbamidomethyl (C) (apply to specified residues or termini only)

**Ions Score:** 111 **Expect:** 3.7e-08

**Matches :** 33/207 fragment ions using 34 most intense peaks ([help](#))

| #  | Immon.   | a         | a*        | a <sup>0</sup> | b         | b*        | b <sup>0</sup> | d         | Seq. | v         | w         | y         | y*        | y <sup>0</sup> | #  |
|----|----------|-----------|-----------|----------------|-----------|-----------|----------------|-----------|------|-----------|-----------|-----------|-----------|----------------|----|
| 1  | 86.0964  | 86.0964   |           |                | 114.0913  |           |                | 44.0495   | L    |           |           |           |           |                | 14 |
| 2  | 72.0808  | 185.1648  |           |                | 213.1598  |           |                | 171.1492  | V    | 1615.6560 | 1628.6764 | 1659.7186 | 1642.6921 | 1641.7081      | 13 |
| 3  | 44.0495  | 256.2020  |           |                | 284.1969  |           |                |           | A    | 1544.6189 |           | 1560.6502 | 1543.6237 | 1542.6397      | 12 |
| 4  | 159.0917 | 442.2813  |           |                | 470.2762  |           |                |           | W    | 1358.5396 |           | 1489.6131 | 1472.5866 | 1471.6026      | 11 |
| 5  | 136.0757 | 605.3446  |           |                | 633.3395  |           |                |           | Y    | 1195.4763 |           | 1303.5338 | 1286.5073 | 1285.5232      | 10 |
| 6  | 88.0393  | 720.3715  |           | 702.3610       | 748.3665  |           | 730.3559       | 676.3817  | D    | 1080.4493 | 1079.4541 | 1140.4705 | 1123.4439 | 1122.4599      | 9  |
| 7  | 87.0553  | 834.4145  | 817.3879  | 816.4039       | 862.4094  | 845.3828  | 844.3988       | 791.4087  | N    | 966.4064  | 965.4112  | 1025.4435 | 1008.4170 | 1007.4330      | 8  |
| 8  | 102.0550 | 963.4571  | 946.4305  | 945.4465       | 991.4520  | 974.4254  | 973.4414       | 905.4516  | E    | 837.3638  | 836.3686  | 911.4006  | 894.3741  | 893.3900       | 7  |
| 9  | 159.0917 | 1149.5364 | 1132.5098 | 1131.5258      | 1177.5313 | 1160.5047 | 1159.5207      |           | W    | 651.2845  |           | 782.3580  | 765.3315  | 764.3474       | 6  |
| 10 | 30.0338  | 1206.5578 | 1189.5313 | 1188.5473      | 1234.5527 | 1217.5262 | 1216.5422      |           | G    |           |           | 596.2787  | 579.2522  | 578.2681       | 5  |
| 11 | 136.0757 | 1369.6212 | 1352.5946 | 1351.6106      | 1397.6161 | 1380.5895 | 1379.6055      |           | Y    | 431.1997  |           | 539.2572  | 522.2307  | 521.2467       | 4  |
| 12 | 60.0444  | 1456.6532 | 1439.6266 | 1438.6426      | 1484.6481 | 1467.6216 | 1466.6375      | 1440.6583 | S    | 344.1677  | 343.1724  | 376.1939  | 359.1674  | 358.1833       | 3  |
| 13 | 87.0553  | 1570.6961 | 1553.6696 | 1552.6856      | 1598.6910 | 1581.6645 | 1580.6805      | 1527.6903 | N    | 230.1248  | 229.1295  | 289.1619  | 272.1353  |                | 2  |
| 14 | 129.1135 |           |           |                |           |           |                |           | R    | 74.0237   | 73.0284   | 175.1190  | 158.0924  |                | 1  |

| Seq   | ya       | yb       | Seq   | ya       | yb       | Seq   | ya       | yb       |
|-------|----------|----------|-------|----------|----------|-------|----------|----------|
| VA    | 143.1179 | 171.1128 | VAW   | 329.1972 | 357.1921 | VAWY  | 492.2605 | 520.2554 |
| VAWYD | 607.2875 | 635.2824 | AW    | 230.1288 | 258.1237 | AWY   | 393.1921 | 421.1870 |
| AWYD  | 508.2191 | 536.2140 | AWYDN | 622.2620 | 650.2569 | WY    | 322.1550 | 350.1499 |
| WYD   | 437.1819 | 465.1769 | WYDN  | 551.2249 | 579.2198 | WYDNE | 680.2675 | 708.2624 |

|              |          |          |              |          |          |              |          |                 |
|--------------|----------|----------|--------------|----------|----------|--------------|----------|-----------------|
| <b>YD</b>    | 251.1026 | 279.0975 | <b>YDN</b>   | 365.1456 | 393.1405 | <b>YDNE</b>  | 494.1882 | <b>522.1831</b> |
| <b>YDNEW</b> | 680.2675 | 708.2624 | <b>DN</b>    | 202.0822 | 230.0771 | <b>DNE</b>   | 331.1248 | <b>359.1197</b> |
| <b>DNEW</b>  | 517.2041 | 545.1991 | <b>DNEWG</b> | 574.2256 | 602.2205 | <b>NE</b>    | 216.0979 | 244.0928        |
| <b>NEW</b>   | 402.1772 | 430.1721 | <b>NEWG</b>  | 459.1987 | 487.1936 | <b>NEWGY</b> | 622.2620 | 650.2569        |
| <b>EW</b>    | 288.1343 | 316.1292 | <b>EWG</b>   | 345.1557 | 373.1506 | <b>EWGY</b>  | 508.2191 | 536.2140        |
| <b>EWGYS</b> | 595.2511 | 623.2460 | <b>WG</b>    | 216.1131 | 244.1081 | <b>WGY</b>   | 379.1765 | 407.1714        |
| <b>WGYS</b>  | 466.2085 | 494.2034 | <b>WGYSN</b> | 580.2514 | 608.2463 | <b>GY</b>    | 193.0972 | 221.0921        |
| <b>GYS</b>   | 280.1292 | 308.1241 | <b>GYSN</b>  | 394.1721 | 422.1670 | <b>YS</b>    | 223.1077 | 251.1026        |
| <b>YSN</b>   | 337.1506 | 365.1456 | <b>SN</b>    | 174.0873 | 202.0822 |              |          |                 |

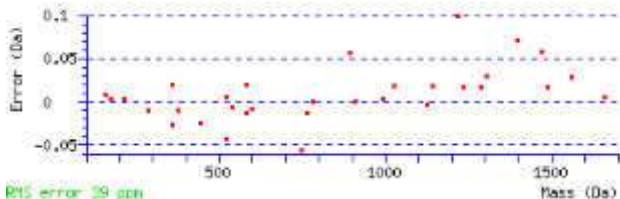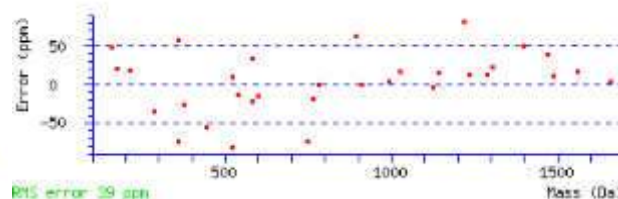

NCBI BLAST search of [LVAWYDNEWGYSNR](#)

(Parameters: blastp, nr protein database, expect=20000, no filter, PAM30)

Other BLAST [web gateways](#)

#### All matches to this query

| Score | Mr(calc)  | Delta   | Sequence                         |
|-------|-----------|---------|----------------------------------|
| 110.9 | 1771.7954 | 0.0295  | <a href="#">LVAWYDNEWGYSNR</a>   |
| 26.7  | 1771.8476 | -0.0226 | <a href="#">IADIGLAKEPGEDSDK</a> |
| 23.4  | 1771.8927 | -0.0678 | <a href="#">LVCDKDYPDKPPAVR</a>  |
| 20.1  | 1770.9450 | 0.8799  | <a href="#">KEALPHADMALLPPPR</a> |
| 16.6  | 1771.7683 | 0.0567  | <a href="#">KTDYAADGAEATGAMR</a> |
| 16.5  | 1771.8529 | -0.0280 | <a href="#">EKDPYLESSNNEVGR</a>  |
| 15.8  | 1771.7811 | 0.0439  | <a href="#">LVDHMWPDFACEPR</a>   |
| 15.5  | 1772.8152 | -0.9902 | <a href="#">MYGTSPTAAERTAFR</a>  |
| 15.4  | 1771.8410 | -0.0161 | <a href="#">IINEPTAAAIACEEDR</a> |
| 15.3  | 1771.9944 | -0.1695 | <a href="#">LVLPLPEKSLQGAHDR</a> |

Mascot: <http://www.matrixscience.com/>

**MATRIX SCIENCE Mascot Search Results**

**Peptide View Spot no 125**

MS/MS Fragmentation of **VPTVDVSVVDLTVRIEK**

Found in **gi968996** in **NCBI nr**, glyceraldehyde-3-phosphate dehydrogenase [Oryza sativa]

Match to Query 67: 1868.081724 from(1869.089000,1+) intensity(0.0000) index(22)

Title: Label: P10, Spot\_Id: 216636, Peak\_List\_Id: 221677, MSMS Job\_Run\_Id: 21387, Comment:

Data file C:\Documents and Settings\Administrator\Desktop\farah BHU\Cotton leaves\RAJESH\12-1-13 raj\ppw\_P10\_136117687500.txt

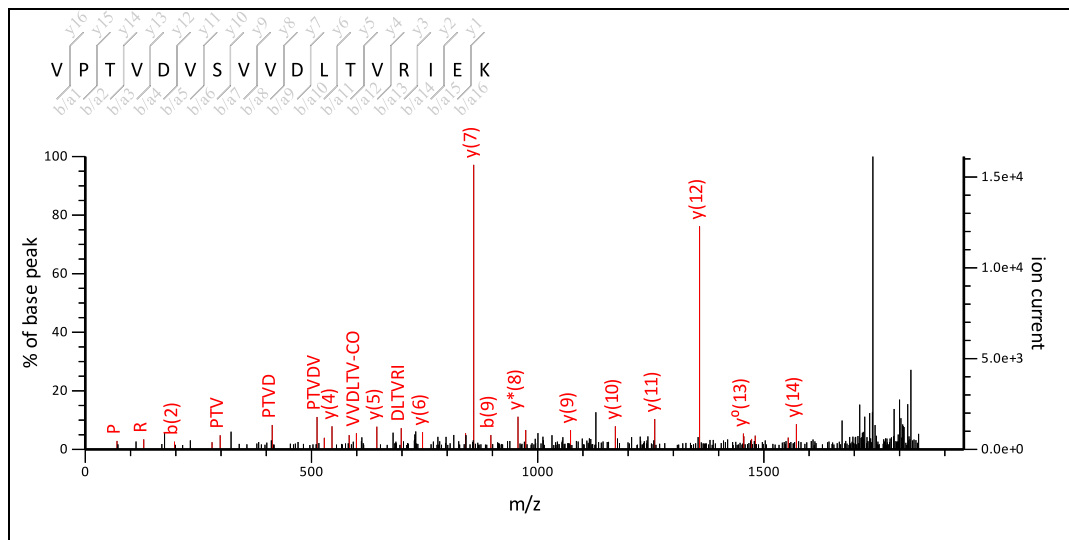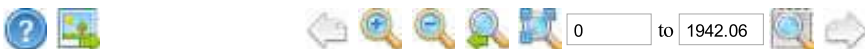

Label all possible matches  Label matches used for scoring

Monoisotopic mass of neutral peptide Mr(calc): 1868.0619

Fixed modifications: Carbamidomethyl (C) (apply to specified residues or termini only)

Ions Score: 64 Expect: 0.0016

Matches : 39/309 fragment ions using 54 most intense peaks [\(help\)](#)

| #  | Immon.   | a         | a*        | a <sup>0</sup> | b         | b*        | b <sup>0</sup> | d         | d'        | Seq. | v         | w         | w'        | y         | y*        |
|----|----------|-----------|-----------|----------------|-----------|-----------|----------------|-----------|-----------|------|-----------|-----------|-----------|-----------|-----------|
| 1  | 72.0808  | 72.0808   |           |                | 100.0757  |           |                | 44.0495   |           | V    |           |           |           |           |           |
| 2  | 70.0651  | 169.1335  |           |                | 197.1285  |           |                | 143.1179  |           | P    | 1727.9538 | 1726.9585 |           | 1770.0007 | 1752.9742 |
| 3  | 74.0600  | 270.1812  |           | 252.1707       | 298.1761  |           | 280.1656       | 254.1863  | 256.1656  | T    | 1626.9061 | 1639.9265 | 1641.9058 | 1672.9480 | 1655.9214 |
| 4  | 72.0808  | 369.2496  |           | 351.2391       | 397.2445  |           | 379.2340       | 355.2340  |           | V    | 1527.8377 | 1540.8581 |           | 1571.9003 | 1554.8737 |
| 5  | 88.0393  | 484.2766  |           | 466.2660       | 512.2715  |           | 494.2609       | 440.2867  |           | D    | 1412.8108 | 1411.8155 |           | 1472.8319 | 1455.8053 |
| 6  | 72.0808  | 583.3450  |           | 565.3344       | 611.3399  |           | 593.3293       | 569.3293  |           | V    | 1313.7423 | 1326.7627 |           | 1357.8049 | 1340.7784 |
| 7  | 60.0444  | 670.3770  |           | 652.3665       | 698.3719  |           | 680.3614       | 654.3821  |           | S    | 1226.7103 | 1225.7151 |           | 1258.7365 | 1241.7100 |
| 8  | 72.0808  | 769.4454  |           | 751.4349       | 797.4403  |           | 779.4298       | 755.4298  |           | V    | 1127.6419 | 1140.6623 |           | 1171.7045 | 1154.6780 |
| 9  | 72.0808  | 868.5138  |           | 850.5033       | 896.5088  |           | 878.4982       | 854.4982  |           | V    | 1028.5735 | 1041.5939 |           | 1072.6361 | 1055.6095 |
| 10 | 88.0393  | 983.5408  |           | 965.5302       | 1011.5357 |           | 993.5251       | 939.5510  |           | D    | 913.5465  | 912.5513  |           | 973.5677  | 956.5411  |
| 11 | 86.0964  | 1096.6249 |           | 1078.6143      | 1124.6198 |           | 1106.6092      | 1054.5779 |           | L    | 800.4625  | 799.4672  |           | 858.5407  | 841.5142  |
| 12 | 74.0600  | 1197.6725 |           | 1179.6620      | 1225.6674 |           | 1207.6569      | 1181.6776 | 1183.6569 | T    | 699.4148  | 712.4352  | 714.4145  | 745.4567  | 728.4301  |
| 13 | 72.0808  | 1296.7409 |           | 1278.7304      | 1324.7359 |           | 1306.7253      | 1282.7253 |           | V    | 600.3464  | 613.3668  |           | 644.4090  | 627.3824  |
| 14 | 129.1135 | 1452.8421 | 1435.8155 | 1434.8315      | 1480.8370 | 1463.8104 | 1462.8264      | 1367.7781 |           | R    | 444.2453  | 443.2500  |           | 545.3406  | 528.3140  |
| 15 | 86.0964  | 1565.9261 | 1548.8996 | 1547.9156      | 1593.9210 | 1576.8945 | 1575.9105      | 1537.8948 | 1551.9105 | I    | 331.1612  | 344.1816  | 358.1973  | 389.2395  | 372.2129  |
| 16 | 102.0550 | 1694.9687 | 1677.9422 | 1676.9581      | 1722.9636 | 1705.9371 | 1704.9531      | 1636.9632 |           | E    | 202.1186  | 201.1234  |           | 276.1554  | 259.1288  |
| 17 | 101.1073 |           |           |                |           |           |                |           |           | K    | 74.0237   | 73.0284   |           | 147.1128  | 130.0863  |

| Seq   | ya       | yb       | Seq    | ya       | yb       | Seq     | ya       | yb       |
|-------|----------|----------|--------|----------|----------|---------|----------|----------|
| PT    | 171.1128 | 199.1077 | PTV    | 270.1812 | 298.1761 | PTVD    | 385.2082 | 413.2031 |
| PTVDV | 484.2766 | 512.2715 | PTVDVS | 571.3086 | 599.3035 | PTVDVSV | 670.3770 | 698.3719 |
| TV    | 173.1285 | 201.1234 | TVD    | 288.1554 | 316.1503 | TVDV    | 387.2238 | 415.2187 |
| TVDVS | 474.2558 | 502.2508 | TVDVSV | 573.3243 | 601.3192 | TVDVSVV | 672.3927 | 700.3876 |

|               |          |          |                |          |          |                |          |          |
|---------------|----------|----------|----------------|----------|----------|----------------|----------|----------|
| <b>VD</b>     | 187.1077 | 215.1026 | <b>VDV</b>     | 286.1761 | 314.1710 | <b>VDVS</b>    | 373.2082 | 401.2031 |
| <b>VDVSV</b>  | 472.2766 | 500.2715 | <b>VDVSVV</b>  | 571.3450 | 599.3399 | <b>VDVSVVD</b> | 686.3719 | 714.3668 |
| <b>DV</b>     | 187.1077 | 215.1026 | <b>DVS</b>     | 274.1397 | 302.1347 | <b>DVSV</b>    | 373.2082 | 401.2031 |
| <b>DVSVV</b>  | 472.2766 | 500.2715 | <b>DVSVVD</b>  | 587.3035 | 615.2984 | <b>VS</b>      | 159.1128 | 187.1077 |
| <b>VSV</b>    | 258.1812 | 286.1761 | <b>VSVV</b>    | 357.2496 | 385.2445 | <b>VSVVD</b>   | 472.2766 | 500.2715 |
| <b>VSVVDL</b> | 585.3606 | 613.3556 | <b>VSVVDLT</b> | 686.4083 | 714.4032 | <b>SV</b>      | 159.1128 | 187.1077 |
| <b>SVV</b>    | 258.1812 | 286.1761 | <b>SVVD</b>    | 373.2082 | 401.2031 | <b>SVVDL</b>   | 486.2922 | 514.2871 |
| <b>SVVDLT</b> | 587.3399 | 615.3348 | <b>SVVDLTV</b> | 686.4083 | 714.4032 | <b>VV</b>      | 171.1492 | 199.1441 |
| <b>VVD</b>    | 286.1761 | 314.1710 | <b>VVDL</b>    | 399.2602 | 427.2551 | <b>VVDLT</b>   | 500.3079 | 528.3028 |
| <b>VVDLTV</b> | 599.3763 | 627.3712 | <b>VD</b>      | 187.1077 | 215.1026 | <b>VDL</b>     | 300.1918 | 328.1867 |
| <b>VDLT</b>   | 401.2395 | 429.2344 | <b>VDLTV</b>   | 500.3079 | 528.3028 | <b>VDLTVR</b>  | 656.4090 | 684.4039 |
| <b>DL</b>     | 201.1234 | 229.1183 | <b>DLT</b>     | 302.1710 | 330.1660 | <b>DLTV</b>    | 401.2395 | 429.2344 |
| <b>DLTVR</b>  | 557.3406 | 585.3355 | <b>DLTVRI</b>  | 670.4246 | 698.4196 | <b>LT</b>      | 187.1441 | 215.1390 |
| <b>LTV</b>    | 286.2125 | 314.2074 | <b>LTVR</b>    | 442.3136 | 470.3085 | <b>LTVRI</b>   | 555.3977 | 583.3926 |
| <b>LTVRIE</b> | 684.4403 | 712.4352 | <b>TV</b>      | 173.1285 | 201.1234 | <b>TVR</b>     | 329.2296 | 357.2245 |
| <b>TVRI</b>   | 442.3136 | 470.3085 | <b>TVRIE</b>   | 571.3562 | 599.3511 | <b>VR</b>      | 228.1819 | 256.1768 |
| <b>VRI</b>    | 341.2659 | 369.2609 | <b>VRIE</b>    | 470.3085 | 498.3035 | <b>RI</b>      | 242.1975 | 270.1925 |
| <b>RIE</b>    | 371.2401 | 399.2350 | <b>IE</b>      | 215.1390 | 243.1339 |                |          |          |

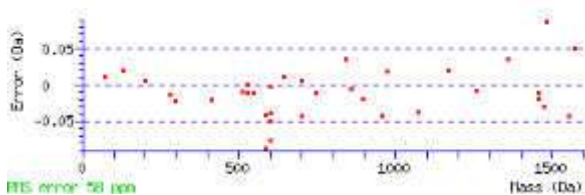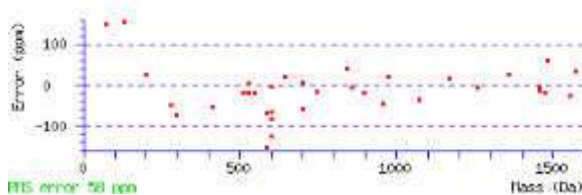

NCBI BLAST search of [VPTVDVSVVDLTVRIEK](#)  
 (Parameters: blastp, nr protein database, expect=20000, no filter, PAM30)  
 Other BLAST [web gateways](#)

All matches to this query

| Score | Mr(calc)  | Delta  | Sequence                          |
|-------|-----------|--------|-----------------------------------|
| 64.1  | 1868.0619 | 0.0198 | <a href="#">VPTVDVSVVDLTVRIEK</a> |
| 64.1  | 1868.0619 | 0.0198 | <a href="#">VPTVDVSVVDLTVRLEK</a> |
| 64.1  | 1868.0619 | 0.0198 | <a href="#">VPTVDVSVVDLTVRLEK</a> |
| 64.1  | 1868.0619 | 0.0198 | <a href="#">VPTVDVSVVDLTVRLEK</a> |
| 64.1  | 1868.0619 | 0.0198 | <a href="#">VPTVDVSVVDLTVRLEK</a> |
| 64.1  | 1868.0619 | 0.0198 | <a href="#">VPTVDVSVVDLTVRLEK</a> |
| 64.1  | 1868.0619 | 0.0198 | <a href="#">VPTVDVSVVDLTVRLEK</a> |
| 64.1  | 1868.0619 | 0.0198 | <a href="#">VPTVDVSVVDLTVRLEK</a> |
| 50.1  | 1868.0255 | 0.0562 | <a href="#">VPEADVSVVDLTVRLEK</a> |
| 41.3  | 1867.0415 | 1.0402 | <a href="#">VPOADVSVVDLTVRLEK</a> |

Mascot: <http://www.matrixscience.com/>




**Mascot Search Results**
**Peptide View**    **Spot no 125**
**MS/MS Fragmentation of GIIGYVEEDLVSTDFVGD SR**

 Found in **gi968996** in **NCBI nr**, glyceraldehyde-3-phosphate dehydrogenase [Oryza sativa]

Match to Query 82: 2170.072324 from(2171.079600,1+) intensity(0.0000) index(26)

Title: Label: P10, Spot\_Id: 216636, Peak\_List\_Id: 221665, MSMS Job\_Run\_Id: 21387, Comment:

Data file C:\Documents and Settings\Administrator\Desktop\farah BHU\Cotton leaves\RAJESH\12-1-13 raj\ppw\_P10\_136117687500.txt

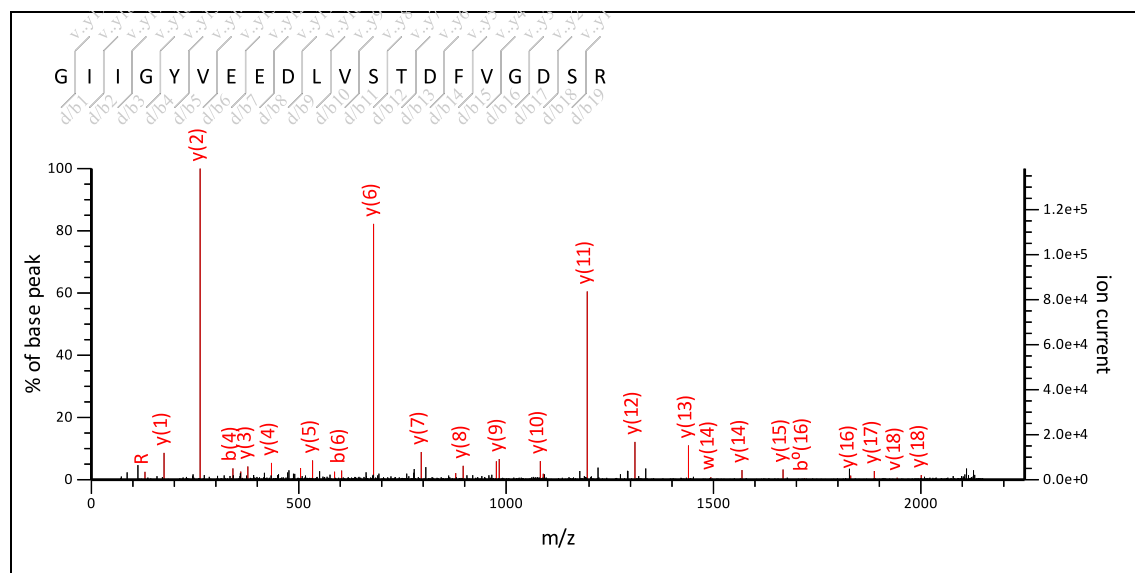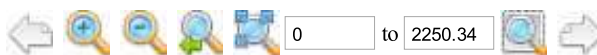
 Label all possible matches     Label matches used for scoring 
**Monoisotopic mass of neutral peptide Mr(calc):** 2170.0430

**Fixed modifications:** Carbamidomethyl (C) (apply to specified residues or termini only)

**Ions Score:** 168    **Expect:** 8.2e-14

**Matches:** 35/344 fragment ions using 42 most intense peaks ([help](#))

| #  | Immon.   | a         | a <sup>0</sup> | b         | b <sup>0</sup> | d         | d'        | Seq. | v         | w         | w'        | y         | y*        | y <sup>0</sup> | #  |
|----|----------|-----------|----------------|-----------|----------------|-----------|-----------|------|-----------|-----------|-----------|-----------|-----------|----------------|----|
| 1  | 30.0338  | 30.0338   |                | 58.0287   |                | 44.0495   |           | G    |           |           |           |           |           |                | 20 |
| 2  | 86.0964  | 143.1179  |                | 171.1128  |                | 115.0866  | 129.1022  | I    | 2055.9506 | 2068.9710 | 2082.9866 | 2114.0288 | 2097.0023 | 2096.0182      | 19 |
| 3  | 86.0964  | 256.2020  |                | 284.1969  |                | 228.1707  | 242.1863  | I    | 1942.8665 | 1955.8869 | 1969.9025 | 2000.9447 | 1983.9182 | 1982.9342      | 18 |
| 4  | 30.0338  | 313.2234  |                | 341.2183  |                |           |           | G    |           |           |           | 1887.8607 | 1870.8341 | 1869.8501      | 17 |
| 5  | 136.0757 | 476.2867  |                | 504.2817  |                |           |           | Y    | 1722.7817 |           |           | 1830.8392 | 1813.8127 | 1812.8287      | 16 |
| 6  | 72.0808  | 575.3552  |                | 603.3501  |                | 561.3395  |           | V    | 1623.7133 | 1636.7337 |           | 1667.7759 | 1650.7493 | 1649.7653      | 15 |
| 7  | 102.0550 | 704.3978  | 686.3872       | 732.3927  | 714.3821       | 646.3923  |           | E    | 1494.6707 | 1493.6754 |           | 1568.7075 | 1551.6809 | 1550.6969      | 14 |
| 8  | 102.0550 | 833.4403  | 815.4298       | 861.4353  | 843.4247       | 775.4349  |           | E    | 1365.6281 | 1364.6329 |           | 1439.6649 | 1422.6383 | 1421.6543      | 13 |
| 9  | 88.0393  | 948.4673  | 930.4567       | 976.4622  | 958.4516       | 904.4775  |           | D    | 1250.6012 | 1249.6059 |           | 1310.6223 | 1293.5957 | 1292.6117      | 12 |
| 10 | 86.0964  | 1061.5514 | 1043.5408      | 1089.5463 | 1071.5357      | 1019.5044 |           | L    | 1137.5171 | 1136.5218 |           | 1195.5953 | 1178.5688 | 1177.5848      | 11 |
| 11 | 72.0808  | 1160.6198 | 1142.6092      | 1188.6147 | 1170.6041      | 1146.6041 |           | V    | 1038.4487 | 1051.4691 |           | 1082.5113 | 1065.4847 | 1064.5007      | 10 |
| 12 | 60.0444  | 1247.6518 | 1229.6412      | 1275.6467 | 1257.6361      | 1231.6569 |           | S    | 951.4167  | 950.4214  |           | 983.4429  | 966.4163  | 965.4323       | 9  |
| 13 | 74.0600  | 1348.6995 | 1330.6889      | 1376.6944 | 1358.6838      | 1332.7046 | 1334.6838 | T    | 850.3690  | 863.3894  | 865.3686  | 896.4108  | 879.3843  | 878.4003       | 8  |
| 14 | 88.0393  | 1463.7264 | 1445.7159      | 1491.7213 | 1473.7108      | 1419.7366 |           | D    | 735.3420  | 734.3468  |           | 795.3632  | 778.3366  | 777.3526       | 7  |
| 15 | 120.0808 | 1610.7948 | 1592.7843      | 1638.7897 | 1620.7792      |           |           | F    | 588.2736  |           |           | 680.3362  | 663.3097  | 662.3257       | 6  |
| 16 | 72.0808  | 1709.8632 | 1691.8527      | 1737.8582 | 1719.8476      | 1695.8476 |           | V    | 489.2052  | 502.2256  |           | 533.2678  | 516.2413  | 515.2572       | 5  |
| 17 | 30.0338  | 1766.8847 | 1748.8741      | 1794.8796 | 1776.8691      |           |           | G    |           |           |           | 434.1994  | 417.1728  | 416.1888       | 4  |
| 18 | 88.0393  | 1881.9117 | 1863.9011      | 1909.9066 | 1891.8960      | 1837.9218 |           | D    | 317.1568  | 316.1615  |           | 377.1779  | 360.1514  | 359.1674       | 3  |
| 19 | 60.0444  | 1968.9437 | 1950.9331      | 1996.9386 | 1978.9280      | 1952.9488 |           | S    | 230.1248  | 229.1295  |           | 262.1510  | 245.1244  | 244.1404       | 2  |

|    |          |  |  |  |  |   |         |         |          |          |   |
|----|----------|--|--|--|--|---|---------|---------|----------|----------|---|
| 20 | 129.1135 |  |  |  |  | R | 74.0237 | 73.0284 | 175.1190 | 158.0924 | 1 |
|----|----------|--|--|--|--|---|---------|---------|----------|----------|---|

| Seq    | ya       | yb       | Seq     | ya       | yb       | Seq    | ya       | yb       |
|--------|----------|----------|---------|----------|----------|--------|----------|----------|
| II     | 199.1805 | 227.1754 | IIG     | 256.2020 | 284.1969 | IIGY   | 419.2653 | 447.2602 |
| IIGYV  | 518.3337 | 546.3286 | IIGYVE  | 647.3763 | 675.3712 | IG     | 143.1179 | 171.1128 |
| IGY    | 306.1812 | 334.1761 | IGYV    | 405.2496 | 433.2445 | IGYVE  | 534.2922 | 562.2871 |
| IGYVEE | 663.3348 | 691.3297 | GY      | 193.0972 | 221.0921 | GYV    | 292.1656 | 320.1605 |
| GYVE   | 421.2082 | 449.2031 | GYVEE   | 550.2508 | 578.2457 | GYVEED | 665.2777 | 693.2726 |
| YV     | 235.1441 | 263.1390 | YVE     | 364.1867 | 392.1816 | YVEE   | 493.2293 | 521.2242 |
| YVEED  | 608.2562 | 636.2511 | VE      | 201.1234 | 229.1183 | VEE    | 330.1660 | 358.1609 |
| VEED   | 445.1929 | 473.1878 | VEEDL   | 558.2770 | 586.2719 | VEEDLV | 657.3454 | 685.3403 |
| EE     | 231.0975 | 259.0925 | EED     | 346.1245 | 374.1194 | EEDL   | 459.2086 | 487.2035 |
| EEDLV  | 558.2770 | 586.2719 | EEDLVS  | 645.3090 | 673.3039 | ED     | 217.0819 | 245.0768 |
| EDL    | 330.1660 | 358.1609 | EDLV    | 429.2344 | 457.2293 | EDLVS  | 516.2664 | 544.2613 |
| EDLVST | 617.3141 | 645.3090 | DL      | 201.1234 | 229.1183 | DLV    | 300.1918 | 328.1867 |
| DLVS   | 387.2238 | 415.2187 | DLVST   | 488.2715 | 516.2664 | DLVSTD | 603.2984 | 631.2933 |
| LV     | 185.1648 | 213.1598 | LVS     | 272.1969 | 300.1918 | LVST   | 373.2445 | 401.2395 |
| LVSTD  | 488.2715 | 516.2664 | LVSTDF  | 635.3399 | 663.3348 | VS     | 159.1128 | 187.1077 |
| VST    | 260.1605 | 288.1554 | VSTD    | 375.1874 | 403.1823 | VSTDF  | 522.2558 | 550.2508 |
| VSTDFV | 621.3243 | 649.3192 | VSTDFVG | 678.3457 | 706.3406 | ST     | 161.0921 | 189.0870 |
| STD    | 276.1190 | 304.1139 | STDF    | 423.1874 | 451.1823 | STDFV  | 522.2558 | 550.2508 |
| STDFVG | 579.2773 | 607.2722 | STDFVGD | 694.3042 | 722.2992 | TD     | 189.0870 | 217.0819 |
| TDF    | 336.1554 | 364.1503 | TDFV    | 435.2238 | 463.2187 | TDFVG  | 492.2453 | 520.2402 |
| TDFVGD | 607.2722 | 635.2671 | TDFVGD  | 694.3042 | 722.2992 | DF     | 235.1077 | 263.1026 |
| DFV    | 334.1761 | 362.1710 | DFVG    | 391.1976 | 419.1925 | DFVGD  | 506.2245 | 534.2195 |
| DFVGD  | 593.2566 | 621.2515 | FV      | 219.1492 | 247.1441 | FVG    | 276.1707 | 304.1656 |
| FVGD   | 391.1976 | 419.1925 | FVGD    | 478.2296 | 506.2245 | VG     | 129.1022 | 157.0972 |
| VGD    | 244.1292 | 272.1241 | VGDS    | 331.1612 | 359.1561 | GD     | 145.0608 | 173.0557 |
| GDS    | 232.0928 | 260.0877 | DS      | 175.0713 | 203.0662 |        |          |          |

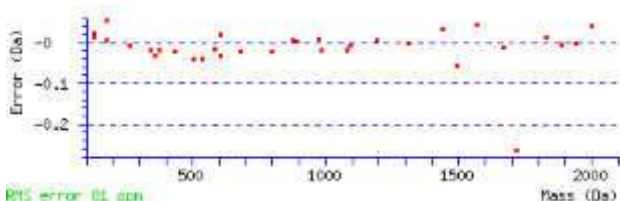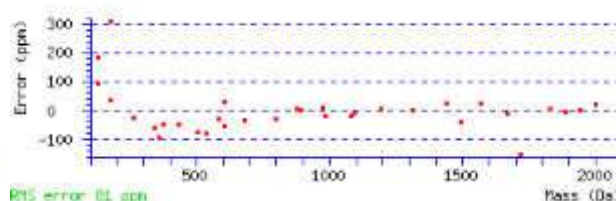

NCBI BLAST search of [GIIGYVEEDLVSTDFVGDSR](#)  
 (Parameters: blastp, nr protein database, expect=20000, no filter, PAM30)  
 Other BLAST [web gateways](#)

All matches to this query

| Score | Mr(calc)  | Delta   | Sequence                              |
|-------|-----------|---------|---------------------------------------|
| 168.1 | 2170.0430 | 0.0293  | <a href="#">GIIGYVEEDLVSTDFVGDSR</a>  |
| 168.1 | 2170.0430 | 0.0293  | <a href="#">GILGYVEEDLVSTDFVGDSR</a>  |
| 150.3 | 2170.0430 | 0.0293  | <a href="#">GILGYIDEDLVSTDFVGDSR</a>  |
| 97.6  | 2170.0430 | 0.0293  | <a href="#">GILGYIEEDVVSTDFVGDSR</a>  |
| 69.3  | 2170.0430 | 0.0293  | <a href="#">GILGYVEEDVVSTDFIGDSR</a>  |
| 43.7  | 2170.0430 | 0.0293  | <a href="#">GILGYIEDDVVSTDFIGDSR</a>  |
| 43.7  | 2170.0430 | 0.0293  | <a href="#">GILGYIEDDVVSTDFIGDSR</a>  |
| 32.7  | 2170.0430 | 0.0293  | <a href="#">GIIGYVEDEDLVSTDFLGDSR</a> |
| 32.7  | 2170.0430 | 0.0293  | <a href="#">GILGYVEDEDLVSTDFLGDSR</a> |
| 18.6  | 2171.0019 | -0.9296 | <a href="#">GILGYTEEDVVSNDVVGDSR</a>  |

**Mascot:** <http://www.matrixscience.com/>

**MATRIX SCIENCE Mascot Search Results**

**Peptide View Spot no 125**

MS/MS Fragmentation of **LKGIIGYVEEDLVSTDFVGD**S R

Found in **gi968996** in **NCBI nr**, glyceraldehyde-3-phosphate dehydrogenase [Oryza sativa]

Match to Query 91: 2411.252524 from(2412.259800,1+) intensity(0.0000) index(30)

Title: Label: P10, Spot\_Id: 216636, Peak\_List\_Id: 221679, MSMS Job\_Run\_Id: 21387, Comment:

Data file C:\Documents and Settings\Administrator\Desktop\farah BHU\Cotton leaves\RAJESH\12-1-13 raj\ppw\_P10\_136117687500.txt

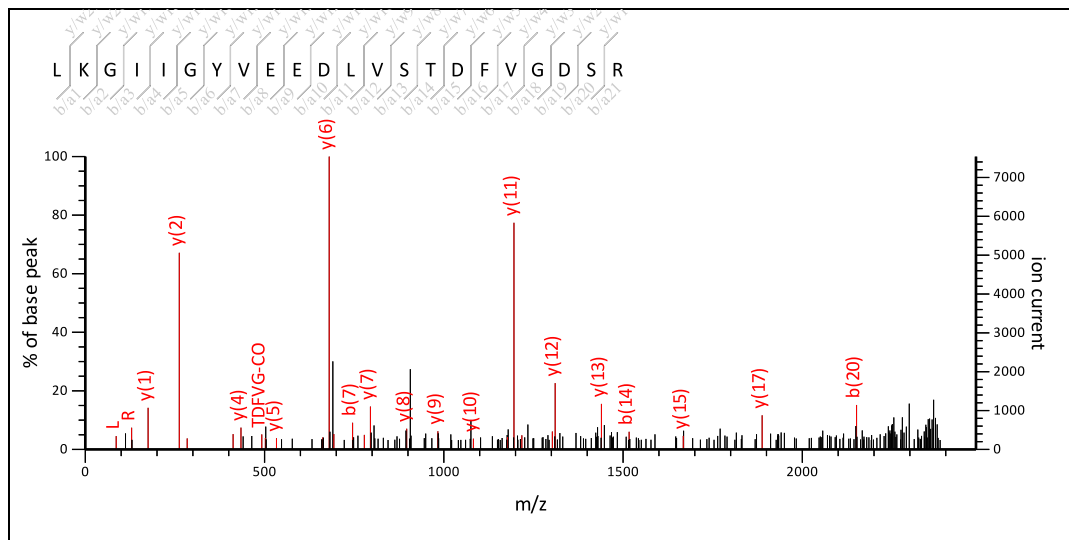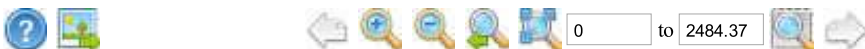

Label all possible matches  Label matches used for scoring

Monoisotopic mass of neutral peptide Mr(calc): 2411.2220

Fixed modifications: Carbamidomethyl (C) (apply to specified residues or termini only)

Ions Score: 52 Expect: 0.02

Matches : 37/419 fragment ions using 86 most intense peaks [\(help\)](#)

| #  | Immon.   | a         | a*        | a <sup>0</sup> | b         | b*        | b <sup>0</sup> | d         | d'        | Seq. | v         | w         | w'        | y         | y*        |
|----|----------|-----------|-----------|----------------|-----------|-----------|----------------|-----------|-----------|------|-----------|-----------|-----------|-----------|-----------|
| 1  | 86.0964  | 86.0964   |           |                | 114.0913  |           |                | 44.0495   |           | L    |           |           |           |           |           |
| 2  | 101.1073 | 214.1914  | 197.1648  |                | 242.1863  | 225.1598  |                | 157.1335  |           | K    | 2226.0561 | 2225.0608 |           | 2299.1452 | 2282.1187 |
| 3  | 30.0338  | 271.2129  | 254.1863  |                | 299.2078  | 282.1812  |                |           |           | G    |           |           |           | 2171.0503 | 2154.0237 |
| 4  | 86.0964  | 384.2969  | 367.2704  |                | 412.2918  | 395.2653  |                | 356.2656  | 370.2813  | I    | 2055.9506 | 2068.9710 | 2082.9866 | 2114.0288 | 2097.0023 |
| 5  | 86.0964  | 497.3810  | 480.3544  |                | 525.3759  | 508.3493  |                | 469.3497  | 483.3653  | I    | 1942.8665 | 1955.8869 | 1969.9025 | 2000.9447 | 1983.9182 |
| 6  | 30.0338  | 554.4024  | 537.3759  |                | 582.3974  | 565.3708  |                |           |           | G    |           |           |           | 1887.8607 | 1870.8341 |
| 7  | 136.0757 | 717.4658  | 700.4392  |                | 745.4607  | 728.4341  |                |           |           | Y    | 1722.7817 |           |           | 1830.8392 | 1813.8127 |
| 8  | 72.0808  | 816.5342  | 799.5076  |                | 844.5291  | 827.5026  |                | 802.5185  |           | V    | 1623.7133 | 1636.7337 |           | 1667.7759 | 1650.7493 |
| 9  | 102.0550 | 945.5768  | 928.5502  | 927.5662       | 973.5717  | 956.5451  | 955.5611       | 887.5713  |           | E    | 1494.6707 | 1493.6754 |           | 1568.7075 | 1551.6809 |
| 10 | 102.0550 | 1074.6194 | 1057.5928 | 1056.6088      | 1102.6143 | 1085.5877 | 1084.6037      | 1016.6139 |           | E    | 1365.6281 | 1364.6329 |           | 1439.6649 | 1422.6383 |
| 11 | 88.0393  | 1189.6463 | 1172.6198 | 1171.6358      | 1217.6412 | 1200.6147 | 1199.6307      | 1145.6565 |           | D    | 1250.6012 | 1249.6059 |           | 1310.6223 | 1293.5957 |
| 12 | 86.0964  | 1302.7304 | 1285.7038 | 1284.7198      | 1330.7253 | 1313.6987 | 1312.7147      | 1260.6834 |           | L    | 1137.5171 | 1136.5218 |           | 1195.5953 | 1178.5688 |
| 13 | 72.0808  | 1401.7988 | 1384.7722 | 1383.7882      | 1429.7937 | 1412.7672 | 1411.7831      | 1387.7831 |           | V    | 1038.4487 | 1051.4691 |           | 1082.5113 | 1065.4847 |
| 14 | 60.0444  | 1488.8308 | 1471.8043 | 1470.8203      | 1516.8257 | 1499.7992 | 1498.8152      | 1472.8359 |           | S    | 951.4167  | 950.4214  |           | 983.4429  | 966.4163  |
| 15 | 74.0600  | 1589.8785 | 1572.8520 | 1571.8679      | 1617.8734 | 1600.8469 | 1599.8629      | 1573.8836 | 1575.8629 | T    | 850.3690  | 863.3894  | 865.3686  | 896.4108  | 879.3843  |
| 16 | 88.0393  | 1704.9054 | 1687.8789 | 1686.8949      | 1732.9004 | 1715.8738 | 1714.8898      | 1660.9156 |           | D    | 735.3420  | 734.3468  |           | 795.3632  | 778.3366  |
| 17 | 120.0808 | 1851.9739 | 1834.9473 | 1833.9633      | 1879.9688 | 1862.9422 | 1861.9582      |           |           | F    | 588.2736  |           |           | 680.3362  | 663.3097  |
| 18 | 72.0808  | 1951.0423 | 1934.0157 | 1933.0317      | 1979.0372 | 1962.0106 | 1961.0266      | 1937.0266 |           | V    | 489.2052  | 502.2256  |           | 533.2678  | 516.2413  |
| 19 | 30.0338  | 2008.0637 | 1991.0372 | 1990.0532      | 2036.0587 | 2019.0321 | 2018.0481      |           |           | G    |           |           |           | 434.1994  | 417.1728  |
| 20 | 88.0393  | 2123.0907 | 2106.0641 | 2105.0801      | 2151.0856 | 2134.0590 | 2133.0750      | 2079.1009 |           | D    | 317.1568  | 316.1615  |           | 377.1779  | 360.1514  |
| 21 | 60.0444  | 2210.1227 | 2193.0962 | 2192.1121      | 2238.1176 | 2221.0911 | 2220.1071      | 2194.1278 |           | S    | 230.1248  | 229.1295  |           | 262.1510  | 245.1244  |
| 22 | 129.1135 |           |           |                |           |           |                |           |           | R    | 74.0237   | 73.0284   |           | 175.1190  | 158.0924  |

| Seq    | ya       | yb       | Seq    | ya       | yb       | Seq     | ya       | yb       |
|--------|----------|----------|--------|----------|----------|---------|----------|----------|
| KG     | 158.1288 | 186.1237 | KGI    | 271.2129 | 299.2078 | KGII    | 384.2969 | 412.2918 |
| KGIIG  | 441.3184 | 469.3133 | KGIIGY | 604.3817 | 632.3766 | GI      | 143.1179 | 171.1128 |
| GII    | 256.2020 | 284.1969 | GIIG   | 313.2234 | 341.2183 | GIIGY   | 476.2867 | 504.2817 |
| GIIGYV | 575.3552 | 603.3501 | II     | 199.1805 | 227.1754 | IIG     | 256.2020 | 284.1969 |
| IIGY   | 419.2653 | 447.2602 | IIGYV  | 518.3337 | 546.3286 | IIGYVE  | 647.3763 | 675.3712 |
| IG     | 143.1179 | 171.1128 | IGY    | 306.1812 | 334.1761 | IGYV    | 405.2496 | 433.2445 |
| IGYVE  | 534.2922 | 562.2871 | IGYVEE | 663.3348 | 691.3297 | GY      | 193.0972 | 221.0921 |
| GYV    | 292.1656 | 320.1605 | GYVE   | 421.2082 | 449.2031 | GYVEE   | 550.2508 | 578.2457 |
| GYVEED | 665.2777 | 693.2726 | YV     | 235.1441 | 263.1390 | YVE     | 364.1867 | 392.1816 |
| YVEE   | 493.2293 | 521.2242 | YVEED  | 608.2562 | 636.2511 | VE      | 201.1234 | 229.1183 |
| VEE    | 330.1660 | 358.1609 | VEED   | 445.1929 | 473.1878 | VEEDL   | 558.2770 | 586.2719 |
| VEEDLV | 657.3454 | 685.3403 | EE     | 231.0975 | 259.0925 | EED     | 346.1245 | 374.1194 |
| EEDL   | 459.2086 | 487.2035 | EEDLV  | 558.2770 | 586.2719 | EEDLVS  | 645.3090 | 673.3039 |
| ED     | 217.0819 | 245.0768 | EDL    | 330.1660 | 358.1609 | EDLV    | 429.2344 | 457.2293 |
| EDLVS  | 516.2664 | 544.2613 | EDLVST | 617.3141 | 645.3090 | DL      | 201.1234 | 229.1183 |
| DLV    | 300.1918 | 328.1867 | DLVS   | 387.2238 | 415.2187 | DLVST   | 488.2715 | 516.2664 |
| DLVSTD | 603.2984 | 631.2933 | LV     | 185.1648 | 213.1598 | LVS     | 272.1969 | 300.1918 |
| LVST   | 373.2445 | 401.2395 | LVSTD  | 488.2715 | 516.2664 | LVSTDF  | 635.3399 | 663.3348 |
| VS     | 159.1128 | 187.1077 | VST    | 260.1605 | 288.1554 | VSTD    | 375.1874 | 403.1823 |
| VSTDF  | 522.2558 | 550.2508 | VSTDFV | 621.3243 | 649.3192 | VSTDFVG | 678.3457 | 706.3406 |
| ST     | 161.0921 | 189.0870 | STD    | 276.1190 | 304.1139 | STDF    | 423.1874 | 451.1823 |
| STDFV  | 522.2558 | 550.2508 | STDFVG | 579.2773 | 607.2722 | STDFVGD | 694.3042 | 722.2992 |
| TD     | 189.0870 | 217.0819 | TDF    | 336.1554 | 364.1503 | TDFV    | 435.2238 | 463.2187 |
| TDFVG  | 492.2453 | 520.2402 | TDFVGD | 607.2722 | 635.2671 | TDFVGDS | 694.3042 | 722.2992 |
| DF     | 235.1077 | 263.1026 | DFV    | 334.1761 | 362.1710 | DFVG    | 391.1976 | 419.1925 |
| DFVGD  | 506.2245 | 534.2195 | DFVGDS | 593.2566 | 621.2515 | FV      | 219.1492 | 247.1441 |
| FVG    | 276.1707 | 304.1656 | FVGD   | 391.1976 | 419.1925 | FVGDS   | 478.2296 | 506.2245 |
| VG     | 129.1022 | 157.0972 | VGD    | 244.1292 | 272.1241 | VGDS    | 331.1612 | 359.1561 |
| GD     | 145.0608 | 173.0557 | GDS    | 232.0928 | 260.0877 | DS      | 175.0713 | 203.0662 |

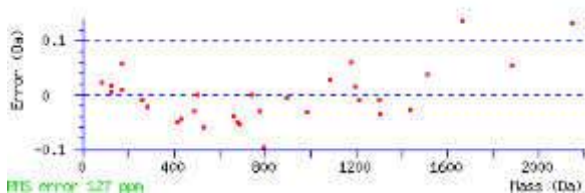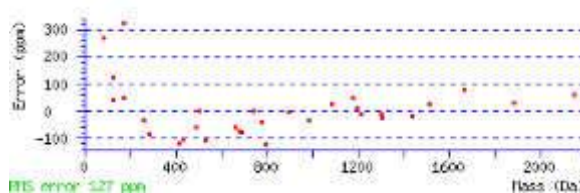

NCBI BLAST search of [LKGIIGYVEEDLVSTDFVGD](#)  
 (Parameters: blastp, nr protein database, expect=20000, no filter, PAM30)  
 Other BLAST [web gateways](#)

#### All matches to this query

| Score | Mr(calcd) | Delta  | Sequence                              |
|-------|-----------|--------|---------------------------------------|
| 51.9  | 2411.2220 | 0.0305 | <a href="#">LKGIIGYVEEDLVSTDFVGD</a>  |
| 51.9  | 2411.2220 | 0.0305 | <a href="#">LKGIIGYVEEDLVSTDFVGD</a>  |
| 24.6  | 2411.2220 | 0.0305 | <a href="#">LKGIIGYVEEDLVSTDFVGD</a>  |
| 12.9  | 2411.2162 | 0.0364 | <a href="#">ELGLPDYWKDPVGLTGYVSR</a>  |
| 10.1  | 2410.6799 | 0.5727 | <a href="#">LTYTTPMYZTKDITDILAAFR</a> |
| 9.8   | 2411.1896 | 0.0629 | <a href="#">LTYTVEYETKDTDILAAFR</a>   |
| 9.7   | 2410.1773 | 1.0752 | <a href="#">FLPSQLEVENGLAISMNCSR</a>  |
| 9.4   | 2411.1719 | 0.0806 | <a href="#">LTYTPIYQTMDDILAAFR</a>    |
| 9.4   | 2411.1719 | 0.0806 | <a href="#">LTYTPLYQTMDDILAAFR</a>    |
| 9.4   | 2410.9087 | 0.3439 | <a href="#">ADCYSMDVEALTDMEEESR</a>   |

Mascot: <http://www.matrixscience.com/>

**MATRIX SCIENCE Mascot Search Results**

**Peptide View Spot no 125**

MS/MS Fragmentation of **VIHDNFGIIEGLMTTVHAITATQK**

Found in **gi968996** in **NCBI nr**, glyceraldehyde-3-phosphate dehydrogenase [Oryza sativa]

Match to Query 99: 2608.415124 from(2609.422400,1+) intensity(0.0000) index(32)

Title: Label: P10, Spot\_Id: 216636, Peak\_List\_Id: 221684, MSMS Job\_Run\_Id: 21387, Comment:

Data file C:\Documents and Settings\Administrator\Desktop\farah BHU\Cotton leaves\RAJESH\12-1-13 raj\ppw\_P10\_136117687500.txt

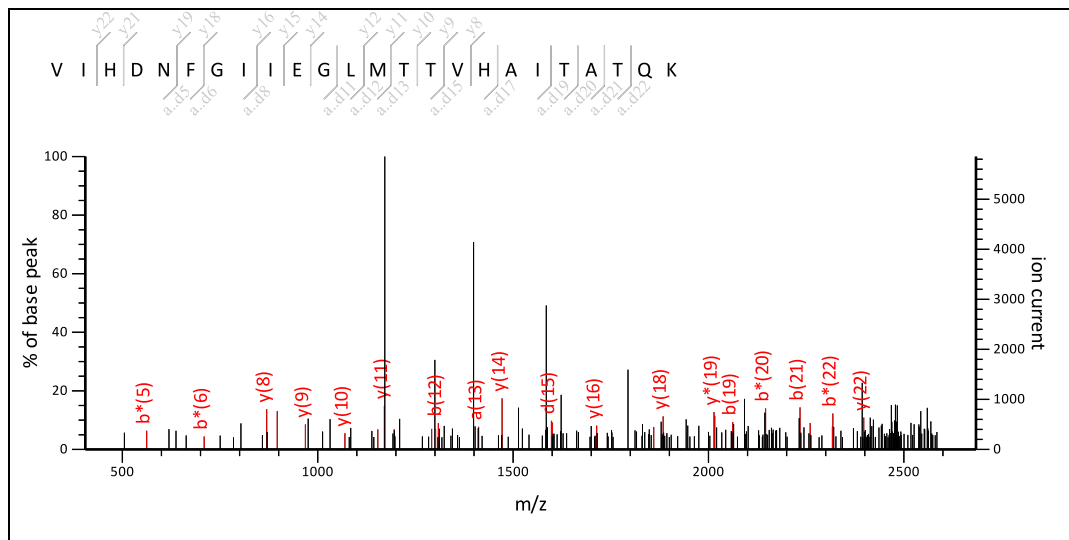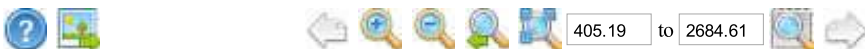

Label all possible matches  Label matches used for scoring

Monoisotopic mass of neutral peptide Mr(calc): 2608.3683

Fixed modifications: Carbamidomethyl (C) (apply to specified residues or termini only)

Ions Score: 28 Expect: 4.5

Matches : 28/481 fragment ions using 79 most intense peaks [\(help\)](#)

| #  | Immon.   | a         | a*        | a <sup>0</sup> | b         | b*        | b <sup>0</sup> | d         | d'        | Seq. | v         | w         | w'        | y         | y*        |
|----|----------|-----------|-----------|----------------|-----------|-----------|----------------|-----------|-----------|------|-----------|-----------|-----------|-----------|-----------|
| 1  | 72.0808  | 72.0808   |           |                | 100.0757  |           |                | 44.0495   |           | V    |           |           |           |           |           |
| 2  | 86.0964  | 185.1648  |           |                | 213.1598  |           |                | 157.1335  | 171.1492  | I    | 2452.2289 | 2465.2493 | 2479.2650 | 2510.3072 | 2493.2806 |
| 3  | 110.0713 | 322.2238  |           |                | 350.2187  |           |                |           |           | H    | 2315.1700 |           |           | 2397.2231 | 2380.1966 |
| 4  | 88.0393  | 437.2507  |           | 419.2401       | 465.2456  |           | 447.2350       | 393.2609  |           | D    | 2200.1431 | 2199.1478 |           | 2260.1642 | 2243.1376 |
| 5  | 87.0553  | 551.2936  | 534.2671  | 533.2831       | 579.2885  | 562.2620  | 561.2780       | 508.2878  |           | N    | 2086.1001 | 2085.1049 |           | 2145.1373 | 2128.1107 |
| 6  | 120.0808 | 698.3620  | 681.3355  | 680.3515       | 726.3569  | 709.3304  | 708.3464       |           |           | F    | 1939.0317 |           |           | 2031.0943 | 2014.0678 |
| 7  | 30.0338  | 755.3835  | 738.3569  | 737.3729       | 783.3784  | 766.3519  | 765.3678       |           |           | G    |           |           |           | 1884.0259 | 1866.9994 |
| 8  | 86.0964  | 868.4676  | 851.4410  | 850.4570       | 896.4625  | 879.4359  | 878.4519       | 840.4363  | 854.4519  | I    | 1768.9262 | 1781.9466 | 1795.9623 | 1827.0044 | 1809.9779 |
| 9  | 86.0964  | 981.5516  | 964.5251  | 963.5411       | 1009.5465 | 992.5200  | 991.5360       | 953.5203  | 967.5360  | I    | 1655.8421 | 1668.8625 | 1682.8782 | 1713.9204 | 1696.8938 |
| 10 | 102.0550 | 1110.5942 | 1093.5677 | 1092.5837      | 1138.5891 | 1121.5626 | 1120.5786      | 1052.5887 |           | E    | 1526.7995 | 1525.8043 |           | 1600.8363 | 1583.8098 |
| 11 | 30.0338  | 1167.6157 | 1150.5891 | 1149.6051      | 1195.6106 | 1178.5840 | 1177.6000      |           |           | G    |           |           |           | 1471.7937 | 1454.7672 |
| 12 | 86.0964  | 1280.6997 | 1263.6732 | 1262.6892      | 1308.6947 | 1291.6681 | 1290.6841      | 1238.6528 |           | L    | 1356.6940 | 1355.6988 |           | 1414.7723 | 1397.7457 |
| 13 | 104.0528 | 1411.7402 | 1394.7137 | 1393.7297      | 1439.7351 | 1422.7086 | 1421.7246      | 1351.7369 |           | M    | 1225.6535 | 1224.6583 |           | 1301.6882 | 1284.6617 |
| 14 | 74.0600  | 1512.7879 | 1495.7614 | 1494.7773      | 1540.7828 | 1523.7563 | 1522.7723      | 1496.7930 | 1498.7723 | T    | 1124.6059 | 1137.6263 | 1139.6055 | 1170.6477 | 1153.6212 |
| 15 | 74.0600  | 1613.8356 | 1596.8090 | 1595.8250      | 1641.8305 | 1624.8040 | 1623.8199      | 1597.8407 | 1599.8199 | T    | 1023.5582 | 1036.5786 | 1038.5578 | 1069.6000 | 1052.5735 |
| 16 | 72.0808  | 1712.9040 | 1695.8775 | 1694.8934      | 1740.8989 | 1723.8724 | 1722.8884      | 1698.8884 |           | V    | 924.4898  | 937.5102  |           | 968.5524  | 951.5258  |
| 17 | 110.0713 | 1849.9629 | 1832.9364 | 1831.9524      | 1877.9578 | 1860.9313 | 1859.9473      |           |           | H    | 787.4308  |           |           | 869.4839  | 852.4574  |
| 18 | 44.0495  | 1921.0000 | 1903.9735 | 1902.9895      | 1948.9949 | 1931.9684 | 1930.9844      |           |           | A    | 716.3937  |           |           | 732.4250  | 715.3985  |
| 19 | 86.0964  | 2034.0841 | 2017.0575 | 2016.0735      | 2062.0790 | 2045.0525 | 2044.0684      | 2006.0528 | 2020.0684 | I    | 603.3097  | 616.3301  | 630.3457  | 661.3879  | 644.3614  |
| 20 | 74.0600  | 2135.1318 | 2118.1052 | 2117.1212      | 2163.1267 | 2146.1001 | 2145.1161      | 2119.1369 | 2121.1161 | T    | 502.2620  | 515.2824  | 517.2617  | 548.3039  | 531.2773  |
| 21 | 44.0495  | 2206.1689 | 2189.1423 | 2188.1583      | 2234.1638 | 2217.1373 | 2216.1532      |           |           | A    | 431.2249  |           |           | 447.2562  | 430.2296  |
| 22 | 74.0600  | 2307.2166 | 2290.1900 | 2289.2060      | 2335.2115 | 2318.1849 | 2317.2009      | 2291.2217 | 2293.2009 | T    | 330.1772  | 343.1976  | 345.1769  | 376.2191  | 359.1925  |
| 23 | 101.0709 | 2435.2751 | 2418.2486 | 2417.2646      | 2463.2701 | 2446.2435 | 2445.2595      | 2378.2537 |           | Q    | 202.1186  | 201.1234  |           | 275.1714  | 258.1448  |



|    |          |  |  |  |  |  |  |  |  |   |         |         |          |          |
|----|----------|--|--|--|--|--|--|--|--|---|---------|---------|----------|----------|
| 24 | 101.1073 |  |  |  |  |  |  |  |  | K | 74.0237 | 73.0284 | 147.1128 | 130.0863 |
|----|----------|--|--|--|--|--|--|--|--|---|---------|---------|----------|----------|

| Seq      | ya       | yb       | Seq    | ya       | yb       | Seq     | ya       | yb       |
|----------|----------|----------|--------|----------|----------|---------|----------|----------|
| IH       | 223.1553 | 251.1503 | IHD    | 338.1823 | 366.1772 | IHDN    | 452.2252 | 480.2201 |
| IHDNF    | 599.2936 | 627.2885 | IHDNFG | 656.3151 | 684.3100 | HD      | 225.0982 | 253.0931 |
| HDN      | 339.1411 | 367.1361 | HDNF   | 486.2096 | 514.2045 | HDNFG   | 543.2310 | 571.2259 |
| HDNFGI   | 656.3151 | 684.3100 | DN     | 202.0822 | 230.0771 | DNF     | 349.1506 | 377.1456 |
| DNFG     | 406.1721 | 434.1670 | DNFGI  | 519.2562 | 547.2511 | DNFGII  | 632.3402 | 660.3352 |
| NF       | 234.1237 | 262.1186 | NFG    | 291.1452 | 319.1401 | NFGI    | 404.2292 | 432.2241 |
| NFGII    | 517.3133 | 545.3082 | NFGIIE | 646.3559 | 674.3508 | FG      | 177.1022 | 205.0972 |
| FGI      | 290.1863 | 318.1812 | FGII   | 403.2704 | 431.2653 | FGIIE   | 532.3130 | 560.3079 |
| FGIIEG   | 589.3344 | 617.3293 | GI     | 143.1179 | 171.1128 | GII     | 256.2020 | 284.1969 |
| GIIIE    | 385.2445 | 413.2395 | GIIIEG | 442.2660 | 470.2609 | GIIIEGL | 555.3501 | 583.3450 |
| GIIIEGLM | 686.3906 | 714.3855 | II     | 199.1805 | 227.1754 | IIE     | 328.2231 | 356.2180 |
| IIEG     | 385.2445 | 413.2395 | IIEGL  | 498.3286 | 526.3235 | IIEGLM  | 629.3691 | 657.3640 |
| IE       | 215.1390 | 243.1339 | IEG    | 272.1605 | 300.1554 | IEGL    | 385.2445 | 413.2395 |
| IEGLM    | 516.2850 | 544.2799 | IEGLMT | 617.3327 | 645.3276 | EG      | 159.0764 | 187.0713 |
| EGL      | 272.1605 | 300.1554 | EGLM   | 403.2010 | 431.1959 | EGLMT   | 504.2486 | 532.2436 |
| EGLMTT   | 605.2963 | 633.2912 | GL     | 143.1179 | 171.1128 | GLM     | 274.1584 | 302.1533 |
| GLMT     | 375.2061 | 403.2010 | GLMTT  | 476.2537 | 504.2486 | GLMTTV  | 575.3221 | 603.3171 |
| LM       | 217.1369 | 245.1318 | LMT    | 318.1846 | 346.1795 | LMTT    | 419.2323 | 447.2272 |
| LMTTV    | 518.3007 | 546.2956 | LMTTVH | 655.3596 | 683.3545 | MT      | 205.1005 | 233.0954 |
| MTT      | 306.1482 | 334.1431 | MTTV   | 405.2166 | 433.2115 | MTTVH   | 542.2755 | 570.2704 |
| MTTVHA   | 613.3126 | 641.3076 | TT     | 175.1077 | 203.1026 | TTV     | 274.1761 | 302.1710 |
| TTVH     | 411.2350 | 439.2300 | TTVHA  | 482.2722 | 510.2671 | TTVHAI  | 595.3562 | 623.3511 |
| TTVHAIT  | 696.4039 | 724.3988 | TV     | 173.1285 | 201.1234 | TVH     | 310.1874 | 338.1823 |
| TVHA     | 381.2245 | 409.2194 | TVHAI  | 494.3085 | 522.3035 | TVHAIT  | 595.3562 | 623.3511 |
| TVHAITA  | 666.3933 | 694.3883 | VH     | 209.1397 | 237.1346 | VHA     | 280.1768 | 308.1717 |
| VHAI     | 393.2609 | 421.2558 | VHAIT  | 494.3085 | 522.3035 | VHAITA  | 565.3457 | 593.3406 |
| VHAITAT  | 666.3933 | 694.3883 | HA     | 181.1084 | 209.1033 | HAI     | 294.1925 | 322.1874 |
| HAIT     | 395.2401 | 423.2350 | HAITA  | 466.2772 | 494.2722 | HAITAT  | 567.3249 | 595.3198 |
| HAITATQ  | 695.3835 | 723.3784 | AI     | 157.1335 | 185.1285 | AIT     | 258.1812 | 286.1761 |
| AITA     | 329.2183 | 357.2132 | AITAT  | 430.2660 | 458.2609 | AITATQ  | 558.3246 | 586.3195 |
| IT       | 187.1441 | 215.1390 | ITA    | 258.1812 | 286.1761 | ITAT    | 359.2289 | 387.2238 |
| ITATQ    | 487.2875 | 515.2824 | TA     | 145.0972 | 173.0921 | TAT     | 246.1448 | 274.1397 |
| TATQ     | 374.2034 | 402.1983 | AT     | 145.0972 | 173.0921 | ATQ     | 273.1557 | 301.1506 |
| TQ       | 202.1186 | 230.1135 |        |          |          |         |          |          |

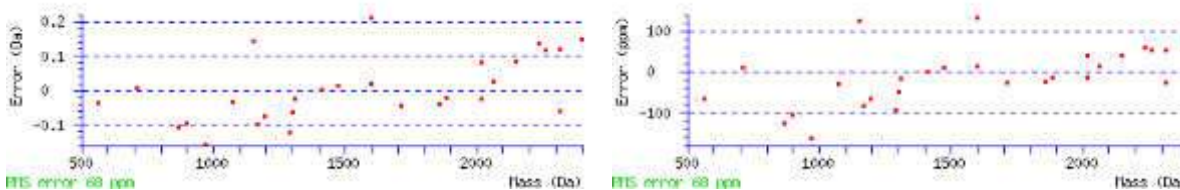

NCBI BLAST search of [VIHDNFGIIEGLMTTVHAITATOK](#)  
 (Parameters: blastp, nr protein database, expect=20000, no filter, PAM30)  
 Other BLAST [web gateways](#)

All matches to this query

| Score | Mr(calc)  | Delta   | Sequence                                  |
|-------|-----------|---------|-------------------------------------------|
| 27.5  | 2608.3683 | 0.0468  | <a href="#">VIHDNFGIIEGLMTTVHAITATOK</a>  |
| 17.4  | 2608.4047 | 0.0104  | <a href="#">VIHDKFGIVEGLMTTVHAITATOK</a>  |
| 1.9   | 2609.2908 | -0.8756 | <a href="#">MSAAAAFLPPAPAVPTRPDQDLSLR</a> |
| 0.9   | 2608.4145 | 0.0006  | <a href="#">YEMAELTPINGKVEIAELKPIINGK</a> |
| 0.7   | 2607.2938 | 1.1214  | <a href="#">SYDVPGIAGTIPCPLCRSAIASER</a>  |
| 0.6   | 2608.1395 | 0.2756  | <a href="#">WGEMVMGSOIDATRATSHGGGDGTR</a> |



**Mascot:** <http://www.matrixscience.com/>



# Mascot Search Results

## Peptide View Spot no 127

MS/MS Fragmentation of **NLSMVYNR**

Found in **gi|285014508** in **NCBI nr**, ATP synthase subunit [Triticum aestivum]

Match to Query 72: 995.500534 from(996.507810,1+) intensity(0.0000) index(5)

Title: Label: K3, Spot\_Id: 219716, Peak\_List\_Id: 225409, MSMS Job\_Run\_Id: 21777, Comment:

Data file C:\Documents and Settings\Administrator\Desktop\farah BHU\spot set plate\Farah-Garima 11May 2013\ppw\_K3\_136842144100.txt

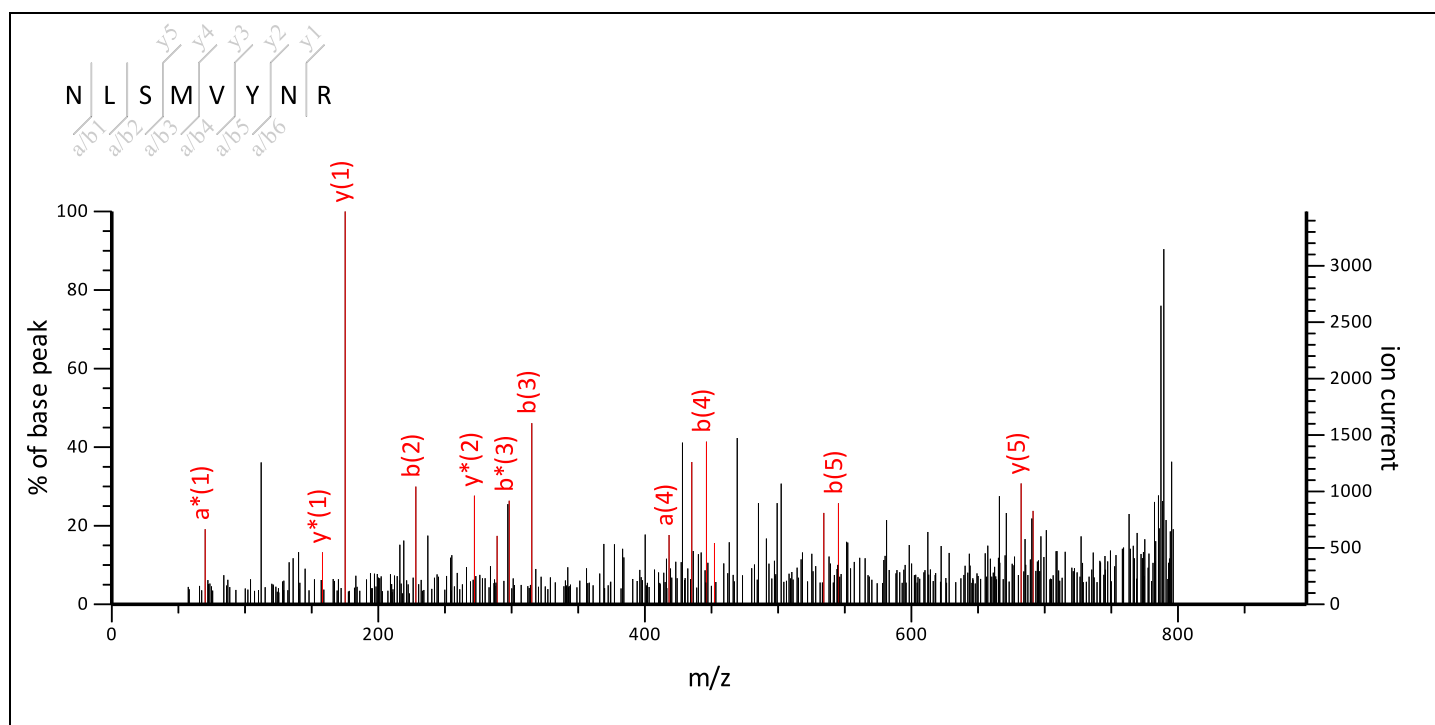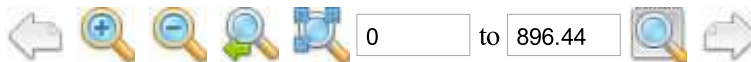

Label all possible matches  Label matches used for scoring

**Monoisotopic mass of neutral peptide Mr(calc):** 995.4858

**Fixed modifications:** Carbamidomethyl (C) (apply to specified residues or termini only)

**Ions Score:** 12 **Expect:** 1.4e+02

**Matches :** 16/42 fragment ions using 48 most intense peaks ([help](#))

| # | a        | a*       | b        | b*       | Seq. | y        | y*       | # |
|---|----------|----------|----------|----------|------|----------|----------|---|
| 1 | 87.0553  | 70.0287  | 115.0502 | 98.0237  | N    |          |          | 8 |
| 2 | 200.1394 | 183.1128 | 228.1343 | 211.1077 | L    | 882.4502 | 865.4237 | 7 |
| 3 | 287.1714 | 270.1448 | 315.1663 | 298.1397 | S    | 769.3661 | 752.3396 | 6 |
| 4 | 418.2119 | 401.1853 | 446.2068 | 429.1802 | M    | 682.3341 | 665.3076 | 5 |
| 5 | 517.2803 | 500.2537 | 545.2752 | 528.2486 | V    | 551.2936 | 534.2671 | 4 |
| 6 | 680.3436 | 663.3171 | 708.3385 | 691.3120 | Y    | 452.2252 | 435.1987 | 3 |
| 7 | 794.3865 | 777.3600 | 822.3815 | 805.3549 | N    | 289.1619 | 272.1353 | 2 |
| 8 |          |          |          |          | R    | 175.1190 | 158.0924 | 1 |

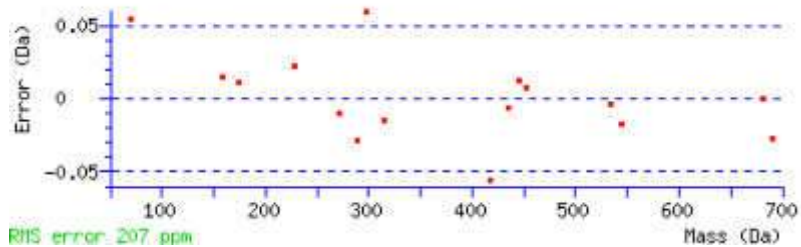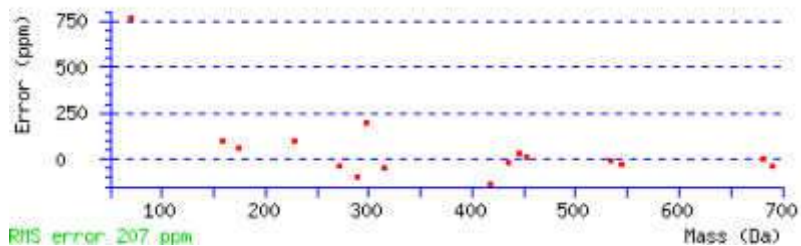

NCBI **BLAST** search of [NLSMVYNR](#)

(Parameters: blastp, nr protein database, expect=20000, no filter, PAM30)

Other BLAST [web gateways](#)

#### All matches to this query

| Score | Mr(calc) | Delta   | Sequence                  |
|-------|----------|---------|---------------------------|
| 12.9  | 995.4825 | 0.0180  | <a href="#">QEGVGGFFR</a> |
| 12.5  | 995.4825 | 0.0181  | <a href="#">KWTDQYR</a>   |
| 12.5  | 995.4977 | 0.0028  | <a href="#">KWTYWGR</a>   |
| 12.5  | 995.5261 | -0.0255 | <a href="#">QGETIHRR</a>  |
| 12.5  | 995.4165 | 0.0841  | <a href="#">QGETMVCR</a>  |
| 12.5  | 995.4165 | 0.0841  | <a href="#">QSVTMDCR</a>  |
| 11.5  | 995.4858 | 0.0147  | <a href="#">NLSMVYNR</a>  |
| 9.9   | 995.5261 | -0.0255 | <a href="#">INSHVRDR</a>  |
| 9.5   | 995.4825 | 0.0181  | <a href="#">DAKTGYWR</a>  |
| 9.5   | 995.5876 | -0.0871 | <a href="#">GTRTPPLVR</a> |

Mascot: <http://www.matrixscience.com/>



# Mascot Search Results

## Peptide View Spot no 127

### MS/MS Fragmentation of **VAIVVLTGER**

Found in **gi|285014508** in **NCBI**nr, ATP synthase subunit [Triticum aestivum]

Match to Query 102: 1055.641924 from(1056.649200,1+) intensity(0.0000) index(8)

Title: Label: K3, Spot\_Id: 219716, Peak\_List\_Id: 225400, MSMS Job\_Run\_Id: 21777, Comment:

Data file C:\Documents and Settings\Administrator\Desktop\farah BHU\spot set plate\Farah-Garima 11May 2013\ppw\_K3\_136842144100.txt

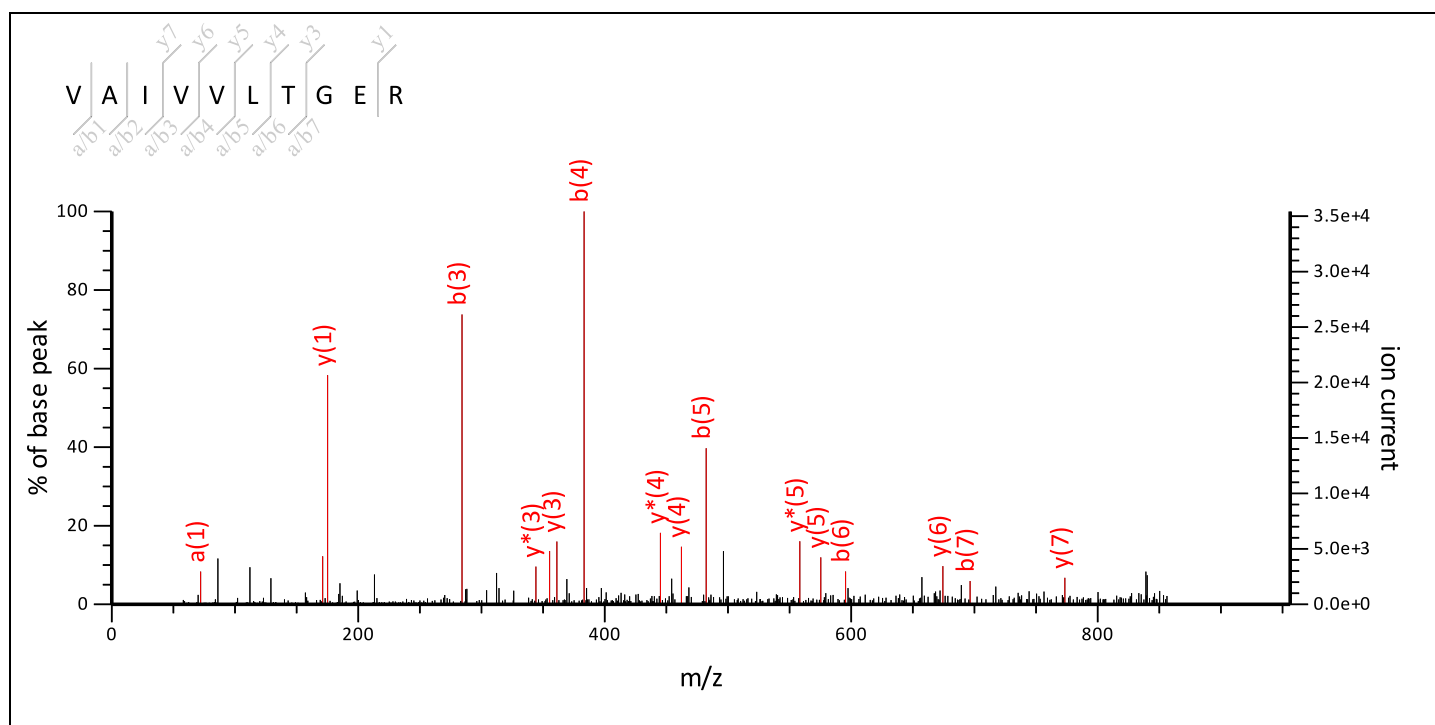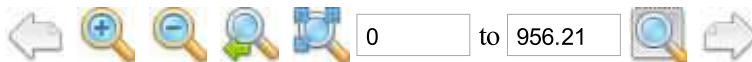

Label all possible matches  Label matches used for scoring

**Monoisotopic mass of neutral peptide Mr(calc):** 1055.6339

**Fixed modifications:** Carbamidomethyl (C) (apply to specified residues or termini only)

**Ions Score:** 50 **Expect:** 0.015

**Matches :** 17/36 fragment ions using 24 most intense peaks ([help](#))

| # | a               | b               | Seq. | y               | y*       | #  |
|---|-----------------|-----------------|------|-----------------|----------|----|
| 1 | <b>72.0808</b>  | 100.0757        | V    |                 |          | 10 |
| 2 | 143.1179        | <b>171.1128</b> | A    | 957.5728        | 940.5462 | 9  |
| 3 | 256.2020        | <b>284.1969</b> | I    | 886.5356        | 869.5091 | 8  |
| 4 | <b>355.2704</b> | <b>383.2653</b> | V    | <b>773.4516</b> | 756.4250 | 7  |
| 5 | 454.3388        | <b>482.3337</b> | V    | <b>674.3832</b> | 657.3566 | 6  |
| 6 | 567.4228        | <b>595.4178</b> | L    | <b>575.3148</b> | 558.2882 | 5  |
| 7 | 668.4705        | <b>696.4654</b> | T    | <b>462.2307</b> | 445.2041 | 4  |
| 8 | 725.4920        | 753.4869        | G    | <b>361.1830</b> | 344.1565 | 3  |

|    |          |          |   |                 |          |   |
|----|----------|----------|---|-----------------|----------|---|
| 9  | 854.5346 | 882.5295 | E | 304.1615        | 287.1350 | 2 |
| 10 |          |          | R | <b>175.1190</b> | 158.0924 | 1 |

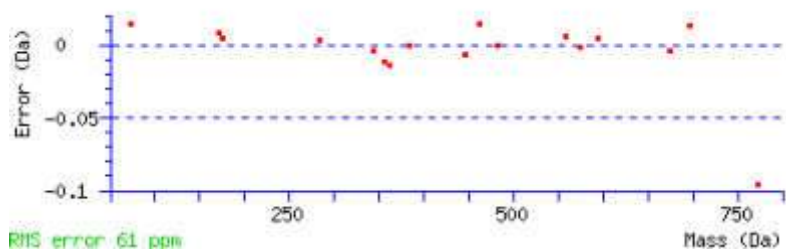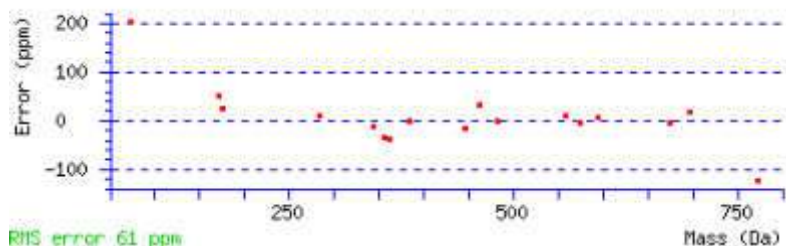

NCBI **BLAST** search of [VAIVVLTGER](#)

(Parameters: blastp, nr protein database, expect=20000, no filter, PAM30)

Other BLAST [web gateways](#)

#### All matches to this query

| Score | Mr(calc)  | Delta   | Sequence                     |
|-------|-----------|---------|------------------------------|
| 49.7  | 1055.6339 | 0.0080  | <a href="#">VAIVVLTGER</a>   |
| 49.7  | 1055.6339 | 0.0080  | <a href="#">VALVLTGER</a>    |
| 36.5  | 1055.6227 | 0.0192  | <a href="#">AIVVVDVVDK</a>   |
| 30.2  | 1055.6451 | -0.0032 | <a href="#">LLRVLETGR</a>    |
| 22.9  | 1055.6637 | -0.0218 | <a href="#">IRLVLGVMR</a>    |
| 22.9  | 1055.6815 | -0.0396 | <a href="#">LLRVLVTSR</a>    |
| 20.8  | 1055.5368 | 0.1051  | <a href="#">VVLCAAHR</a>     |
| 20.2  | 1055.6703 | -0.0283 | <a href="#">VLVAVVKSNIK</a>  |
| 19.7  | 1055.6339 | 0.0080  | <a href="#">LGLVVGGLGSGK</a> |
| 19.6  | 1055.5876 | 0.0543  | <a href="#">VIAVQQGWR</a>    |

Mascot: <http://www.matrixscience.com/>



# Mascot Search Results

## Peptide View Spot no 127

MS/MS Fragmentation of **ALQESLASELAAR**

Found in **gi|285014508** in **NCBIInr**, ATP synthase subunit [*Triticum aestivum*]

Match to Query 196: 1357.730924 from(1358.738200,1+) intensity(0.0000) index(20)

Title: Label: K3, Spot\_Id: 219716, Peak\_List\_Id: 225399, MSMS Job\_Run\_Id: 21777, Comment:

Data file C:\Documents and Settings\Administrator\Desktop\farah BHU\spot set plate\Farah-Garima 11May

2013\ppw\_K3\_136842144100.txt

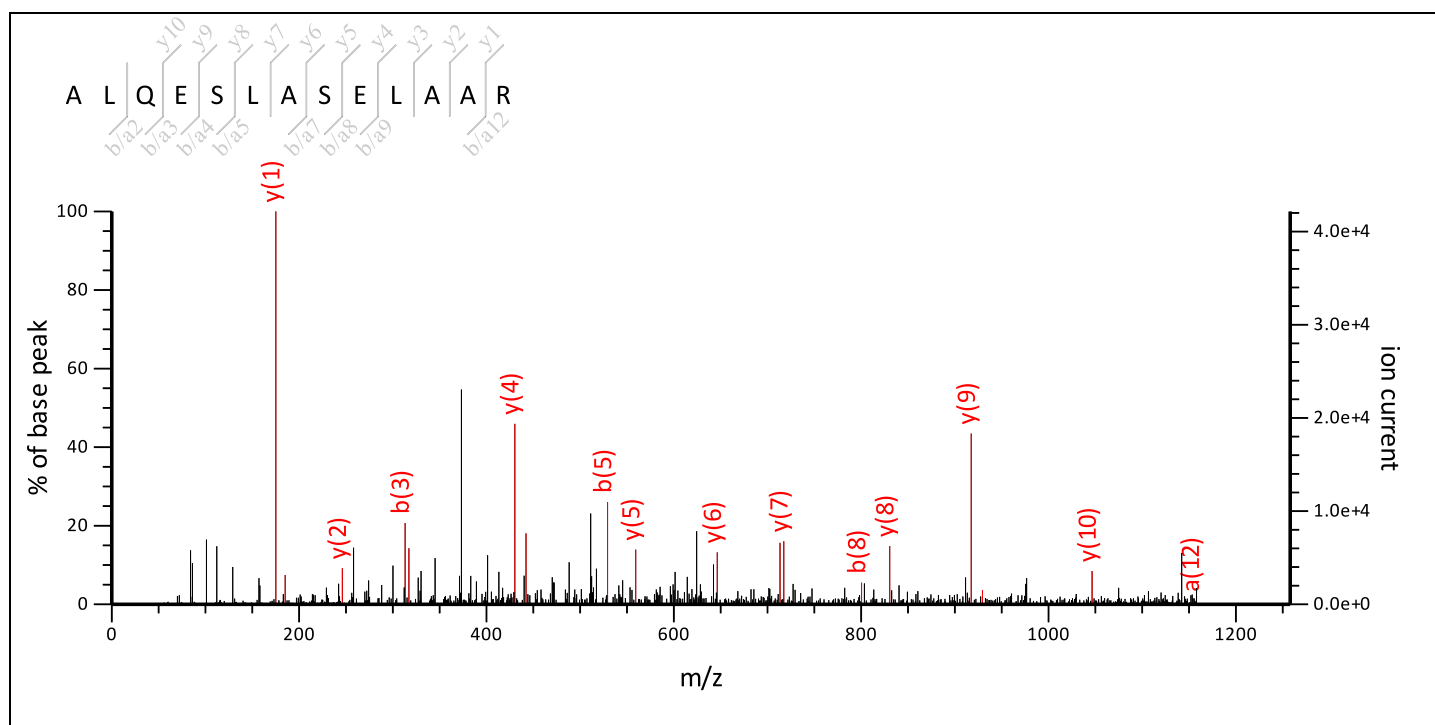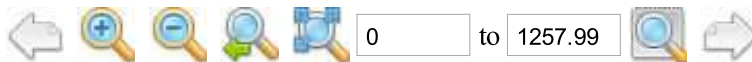

Label all possible matches  Label matches used for scoring

**Monoisotopic mass of neutral peptide Mr(calc):** 1357.7201

**Fixed modifications:** Carbamidomethyl (C) (apply to specified residues or termini only)

**Ions Score:** 64 **Expect:** 0.00092

**Matches :** 18/68 fragment ions using 36 most intense peaks ([help](#))

| # | a        | a*       | b               | b*       | Seq. | y                | y*        | #  |
|---|----------|----------|-----------------|----------|------|------------------|-----------|----|
| 1 | 44.0495  |          | 72.0444         |          | A    |                  |           | 13 |
| 2 | 157.1335 |          | <b>185.1285</b> |          | L    | 1287.6903        | 1270.6638 | 12 |
| 3 | 285.1921 | 268.1656 | <b>313.1870</b> | 296.1605 | Q    | 1174.6062        | 1157.5797 | 11 |
| 4 | 414.2347 | 397.2082 | <b>442.2296</b> | 425.2031 | E    | <b>1046.5477</b> | 1029.5211 | 10 |
| 5 | 501.2667 | 484.2402 | <b>529.2617</b> | 512.2351 | S    | <b>917.5051</b>  | 900.4785  | 9  |
| 6 | 614.3508 | 597.3243 | 642.3457        | 625.3192 | L    | <b>830.4730</b>  | 813.4465  | 8  |
| 7 | 685.3879 | 668.3614 | <b>713.3828</b> | 696.3563 | A    | <b>717.3890</b>  | 700.3624  | 7  |
| 8 | 772.4199 | 755.3934 | <b>800.4149</b> | 783.3883 | S    | <b>646.3519</b>  | 629.3253  | 6  |

|    |                  |           |                 |           |   |                 |          |   |
|----|------------------|-----------|-----------------|-----------|---|-----------------|----------|---|
| 9  | 901.4625         | 884.4360  | <b>929.4575</b> | 912.4309  | E | <b>559.3198</b> | 542.2933 | 5 |
| 10 | 1014.5466        | 997.5201  | 1042.5415       | 1025.5150 | L | <b>430.2772</b> | 413.2507 | 4 |
| 11 | 1085.5837        | 1068.5572 | 1113.5786       | 1096.5521 | A | <b>317.1932</b> | 300.1666 | 3 |
| 12 | <b>1156.6208</b> | 1139.5943 | 1184.6157       | 1167.5892 | A | <b>246.1561</b> | 229.1295 | 2 |
| 13 |                  |           |                 |           | R | <b>175.1190</b> | 158.0924 | 1 |

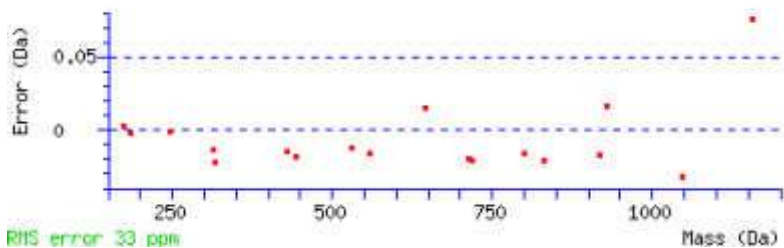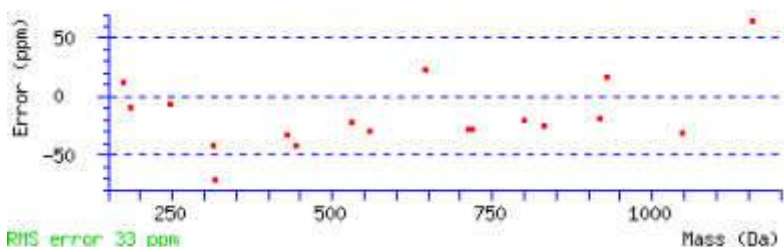

NCBI **BLAST** search of [ALQESLASELAAR](#)

(Parameters: blastp, nr protein database, expect=20000, no filter, PAM30)

Other BLAST [web gateways](#)

#### All matches to this query

| Score | Mr(calc)  | Delta   | Sequence                       |
|-------|-----------|---------|--------------------------------|
| 63.7  | 1357.7201 | 0.0108  | <a href="#">ALQESIASLAAR</a>   |
| 63.7  | 1357.7201 | 0.0108  | <a href="#">ALQESLASELAAR</a>  |
| 35.1  | 1357.7201 | 0.0108  | <a href="#">SLQEALASELAAR</a>  |
| 31.4  | 1357.7201 | 0.0108  | <a href="#">KALEESAAELAAR</a>  |
| 22.9  | 1357.7201 | 0.0108  | <a href="#">IATTASPVSGAEVR</a> |
| 19.5  | 1357.7751 | -0.0442 | <a href="#">KALITCLEIAAR</a>   |
| 18.9  | 1357.6950 | 0.0359  | <a href="#">QALADDTDRVVR</a>   |
| 18.1  | 1357.7354 | -0.0044 | <a href="#">KAISELDGWLAR</a>   |
| 18.1  | 1357.6837 | 0.0472  | <a href="#">QALTDLAAPSSER</a>  |
| 16.9  | 1357.7929 | -0.0620 | <a href="#">KITDATLSVIAAR</a>  |

Mascot: <http://www.matrixscience.com/>



# MATRIX SCIENCE Mascot Search Results

## Peptide View **Spot no 127**

MS/MS Fragmentation of **SDPIIQTLPLMSPK**

Found in **gi|285014508** in **NCBI nr**, ATP synthase subunit [*Triticum aestivum*]

Match to Query 232: 1554.818724 from(1555.826000,1+) intensity(0.0000) index(22)

Title: Label: K3, Spot\_Id: 219716, Peak\_List\_Id: 225421, MSMS Job\_Run\_Id: 21777, Comment:

Data file C:\Documents and Settings\Administrator\Desktop\farah BHU\spot set plate\Farah-Garima 11May 2013\ppw\_K3\_136842144100.txt

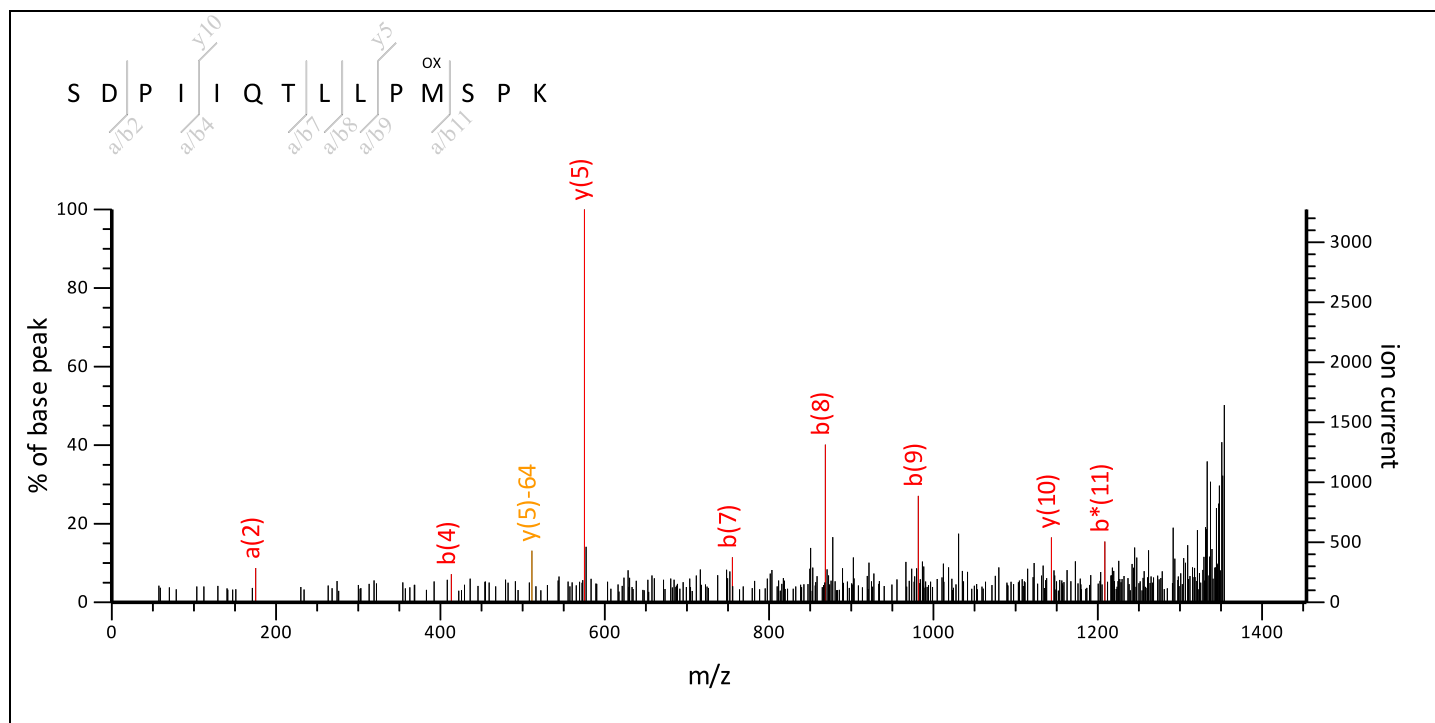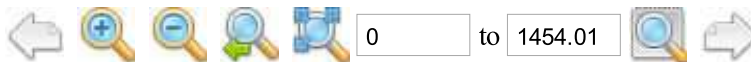

Label all possible matches  Label matches used for scoring

**Monoisotopic mass of neutral peptide Mr(calc):** 1554.8327

**Fixed modifications:** Carbamidomethyl (C) (apply to specified residues or termini only)

**Variable modifications:**

**M11** : Oxidation (M), with neutral losses 0.0000 (shown in table), 63.9983

**Ions Score:** 19 **Expect:** 25

**Matches** : 9/100 fragment ions using 13 most intense peaks ([help](#))

| # | a               | a*       | b               | b*       | Seq. | y                | y*        | #  |
|---|-----------------|----------|-----------------|----------|------|------------------|-----------|----|
| 1 | 60.0444         |          | 88.0393         |          | S    |                  |           | 14 |
| 2 | <b>175.0713</b> |          | 203.0662        |          | D    | 1468.8080        | 1451.7814 | 13 |
| 3 | 272.1241        |          | 300.1190        |          | P    | 1353.7810        | 1336.7545 | 12 |
| 4 | 385.2082        |          | <b>413.2031</b> |          | I    | 1256.7283        | 1239.7017 | 11 |
| 5 | 498.2922        |          | 526.2871        |          | I    | <b>1143.6442</b> | 1126.6177 | 10 |
| 6 | 626.3508        | 609.3243 | 654.3457        | 637.3192 | Q    | 1030.5601        | 1013.5336 | 9  |

|    |           |           |                 |                  |   |                 |          |   |
|----|-----------|-----------|-----------------|------------------|---|-----------------|----------|---|
| 7  | 727.3985  | 710.3719  | <b>755.3934</b> | 738.3668         | T | 902.5016        | 885.4750 | 8 |
| 8  | 840.4825  | 823.4560  | <b>868.4775</b> | 851.4509         | L | 801.4539        | 784.4273 | 7 |
| 9  | 953.5666  | 936.5401  | <b>981.5615</b> | 964.5350         | L | 688.3698        | 671.3433 | 6 |
| 10 | 1050.6194 | 1033.5928 | 1078.6143       | 1061.5877        | P | <b>575.2858</b> | 558.2592 | 5 |
| 11 | 1197.6548 | 1180.6282 | 1225.6497       | <b>1208.6231</b> | M | 478.2330        | 461.2064 | 4 |
| 12 | 1284.6868 | 1267.6603 | 1312.6817       | 1295.6552        | S | 331.1976        | 314.1710 | 3 |
| 13 | 1381.7396 | 1364.7130 | 1409.7345       | 1392.7079        | P | 244.1656        | 227.1390 | 2 |
| 14 |           |           |                 |                  | K | 147.1128        | 130.0863 | 1 |

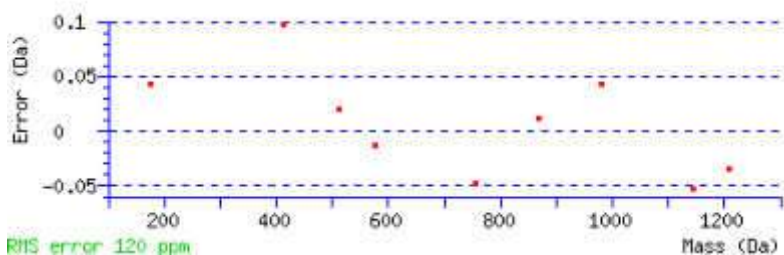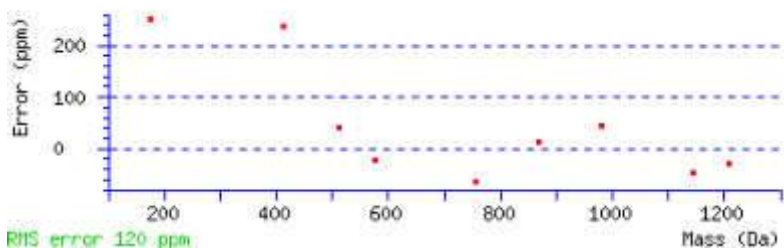

NCBI BLAST search of [SDPIIQTLPMSPK](#)

(Parameters: blastp, nr protein database, expect=20000, no filter, PAM30)

Other BLAST [web gateways](#)

#### All matches to this query

| Score | Mr(calc)  | Delta   | Sequence                       |
|-------|-----------|---------|--------------------------------|
| 18.9  | 1554.8327 | -0.0140 | <a href="#">SDPIIQTLPMSPK</a>  |
| 12.6  | 1554.9286 | -0.1099 | <a href="#">SIVLWRILLLSGW</a>  |
| 10.6  | 1554.8630 | -0.0443 | <a href="#">AFEIARVHGLISSR</a> |
| 10.5  | 1554.8163 | 0.0024  | <a href="#">FIPCGLIQLHAMR</a>  |
| 10.5  | 1554.8163 | 0.0024  | <a href="#">FLPCGLIQLHAMR</a>  |
| 10.5  | 1554.8374 | -0.0187 | <a href="#">SLEMNILMAKLHR</a>  |
| 9.9   | 1554.8089 | 0.0098  | <a href="#">LMSLGGSRVFRPR</a>  |
| 9.9   | 1554.7402 | 0.0786  | <a href="#">WPINMEHGWITR</a>   |
| 9.1   | 1554.9344 | -0.1157 | <a href="#">ALKDELLLLSTLAR</a> |
| 8.3   | 1554.8729 | -0.0542 | <a href="#">AIIDLQELIESRR</a>  |

Mascot: <http://www.matrixscience.com/>



# Mascot Search Results

## Peptide View **Spot no 128**

MS/MS Fragmentation of **EAAWGLAR**

Found in **gi|108864048** in **NCBIInr**, Fructose-bisphosphate aldolase, chloroplast precursor, putative, expressed [Oryza sativa Japonica Group]

Match to Query 2: 872.510124 from(873.517400,1+) intensity(0.0000) index(0)

Title: Label: K15, Spot\_Id: 219908, Peak\_List\_Id: 228510, MSMS Job\_Run\_Id: 21992, Comment:

Data file C:\Documents and Settings\Administrator\Desktop\Farah-Garima 11May 2013\ppw\_K15\_136868296900.txt

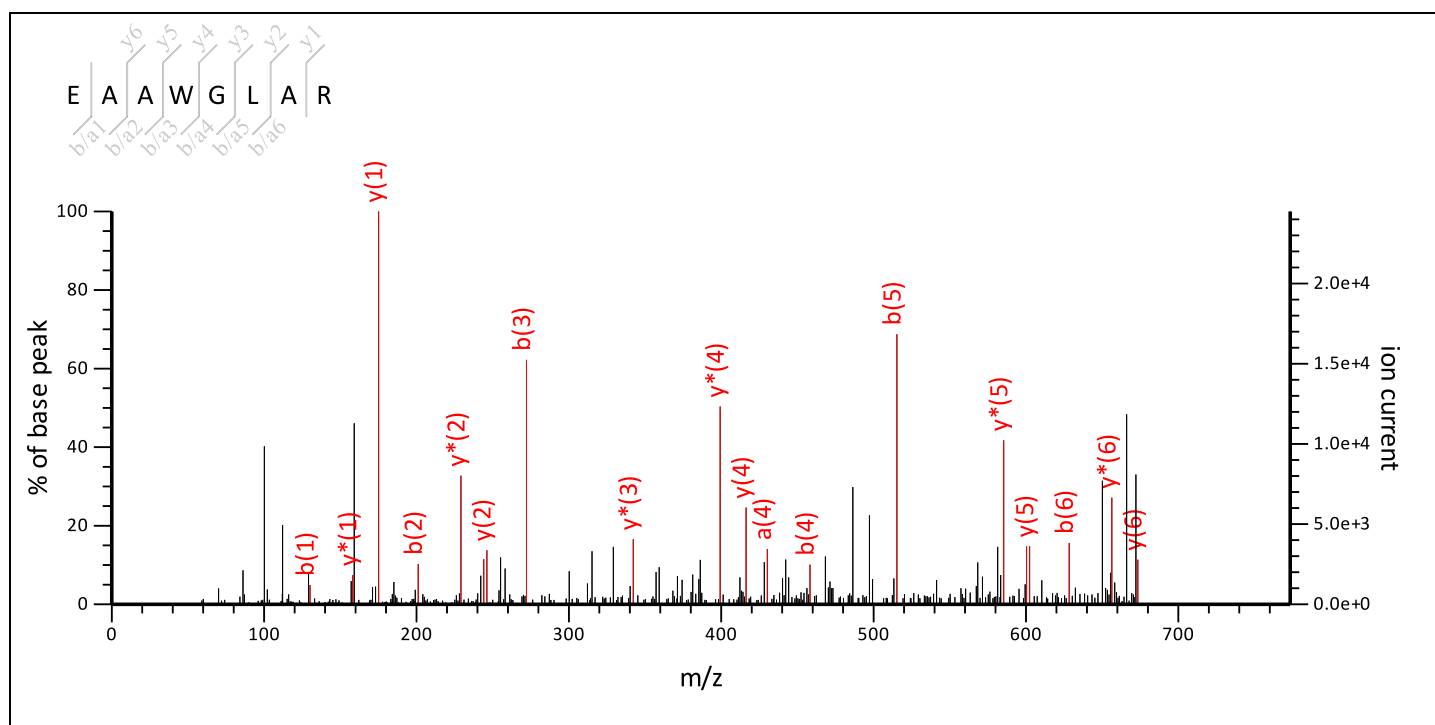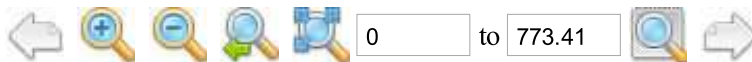

Label all possible matches  Label matches used for scoring

**Monoisotopic mass of neutral peptide Mr(calc):** 872.4504

**Fixed modifications:** Carbamidomethyl (C) (apply to specified residues or termini only)

**Ions Score:** 29 **Expect:** 3.7

**Matches :** 20/28 fragment ions using 49 most intense peaks ([help](#))

| # | a               | b               | Seq. | y               | y*       | # |
|---|-----------------|-----------------|------|-----------------|----------|---|
| 1 | 102.0550        | <b>130.0499</b> | E    |                 |          | 8 |
| 2 | 173.0921        | <b>201.0870</b> | A    | 744.4151        | 727.3886 | 7 |
| 3 | <b>244.1292</b> | <b>272.1241</b> | A    | <b>673.3780</b> | 656.3515 | 6 |
| 4 | <b>430.2085</b> | <b>458.2034</b> | W    | <b>602.3409</b> | 585.3144 | 5 |
| 5 | 487.2300        | <b>515.2249</b> | G    | <b>416.2616</b> | 399.2350 | 4 |
| 6 | <b>600.3140</b> | <b>628.3089</b> | L    | 359.2401        | 342.2136 | 3 |
| 7 | 671.3511        | 699.3461        | A    | <b>246.1561</b> | 229.1295 | 2 |

|   |  |  |   |          |          |   |
|---|--|--|---|----------|----------|---|
| 8 |  |  | R | 175.1190 | 158.0924 | 1 |
|---|--|--|---|----------|----------|---|

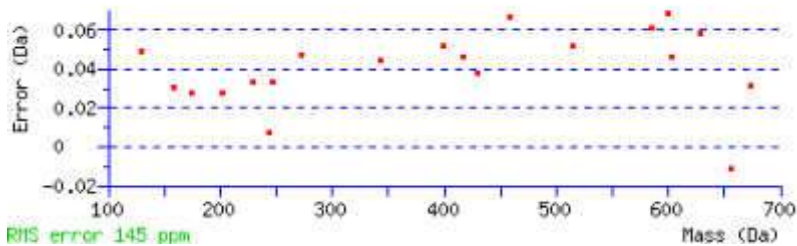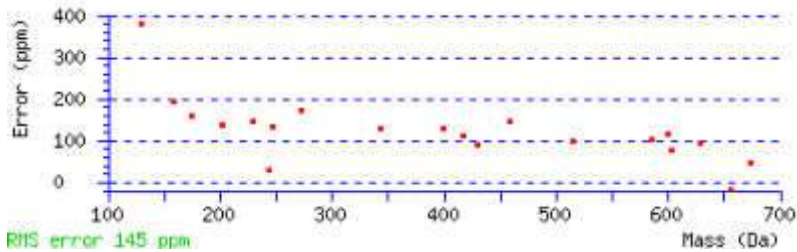

NCBI **BLAST** search of [EAAWGLAR](#)

(Parameters: blastp, nr protein database, expect=20000, no filter, PAM30)

Other BLAST [web gateways](#)

#### All matches to this query

| Score | Mr(calc) | Delta   | Sequence                  |
|-------|----------|---------|---------------------------|
| 28.8  | 872.4504 | 0.0597  | <a href="#">EAAWGLAR</a>  |
| 25.0  | 872.5080 | 0.0022  | <a href="#">GTIGVSLAR</a> |
| 24.2  | 872.4352 | 0.0749  | <a href="#">VDNDAIAR</a>  |
| 23.3  | 872.4604 | 0.0498  | <a href="#">VGDATPSVK</a> |
| 22.2  | 872.4352 | 0.0750  | <a href="#">KEAEGSPR</a>  |
| 22.2  | 872.4716 | 0.0386  | <a href="#">VGTAVAEAR</a> |
| 22.2  | 872.5080 | 0.0022  | <a href="#">ISAVSVAAR</a> |
| 22.0  | 872.4352 | 0.0750  | <a href="#">EAATAPSAR</a> |
| 21.9  | 872.4716 | 0.0386  | <a href="#">LASDAVAAR</a> |
| 21.5  | 872.5192 | -0.0091 | <a href="#">TVASRIAR</a>  |

Mascot: <http://www.matrixscience.com/>



# Mascot Search Results

## Peptide View Spot no 128

### MS/MS Fragmentation of **AAQDALLR**

Found in **gi|108864048** in **NCBI nr**, Fructose-bisphosphate aldolase, chloroplast precursor, putative, expressed [Oryza sativa Japonica Group]

Match to Query 23: 969.593984 from(970.601260,1+) intensity(0.0000) index(5)

Title: Label: K15, Spot\_Id: 219908, Peak\_List\_Id: 228496, MSMS Job\_Run\_Id: 21992, Comment:

Data file C:\Documents and Settings\Administrator\Desktop\Farah-Garima 11May 2013\ppw\_K15\_136868296900.txt

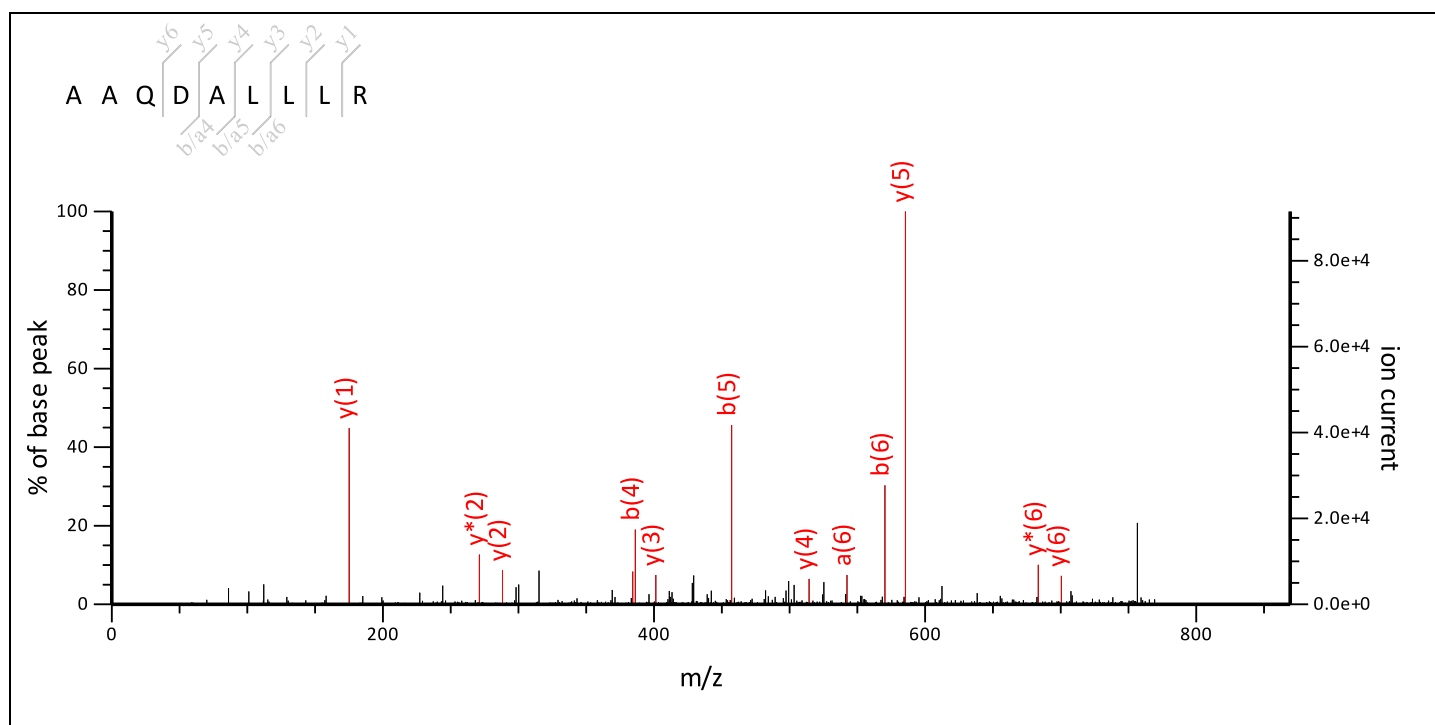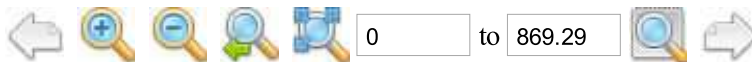

Label all possible matches  Label matches used for scoring

**Monoisotopic mass of neutral peptide Mr(calc):** 969.5607

**Fixed modifications:** Carbamidomethyl (C) (apply to specified residues or termini only)

**Ions Score:** 38 **Expect:** 0.2

**Matches:** 15/44 fragment ions using 24 most intense peaks ([help](#))

| # | a               | a*       | b               | b*       | Seq. | y               | y*              | # |
|---|-----------------|----------|-----------------|----------|------|-----------------|-----------------|---|
| 1 | 44.0495         |          | 72.0444         |          | A    |                 |                 | 9 |
| 2 | 115.0866        |          | 143.0815        |          | A    | 899.5309        | 882.5043        | 8 |
| 3 | 243.1452        | 226.1186 | <b>271.1401</b> | 254.1135 | Q    | 828.4938        | 811.4672        | 7 |
| 4 | 358.1721        | 341.1456 | <b>386.1670</b> | 369.1405 | D    | <b>700.4352</b> | <b>683.4087</b> | 6 |
| 5 | 429.2092        | 412.1827 | <b>457.2041</b> | 440.1776 | A    | <b>585.4083</b> | 568.3817        | 5 |
| 6 | <b>542.2933</b> | 525.2667 | <b>570.2882</b> | 553.2617 | L    | <b>514.3711</b> | 497.3446        | 4 |
| 7 | 655.3774        | 638.3508 | <b>683.3723</b> | 666.3457 | L    | <b>401.2871</b> | <b>384.2605</b> | 3 |

|   |          |          |          |          |   |          |          |   |
|---|----------|----------|----------|----------|---|----------|----------|---|
| 8 | 768.4614 | 751.4349 | 796.4563 | 779.4298 | L | 288.2030 | 271.1765 | 2 |
| 9 |          |          |          |          | R | 175.1190 | 158.0924 | 1 |

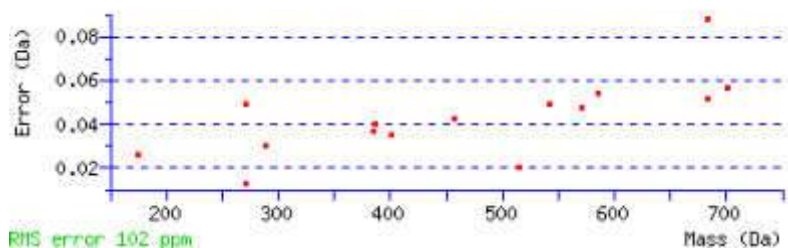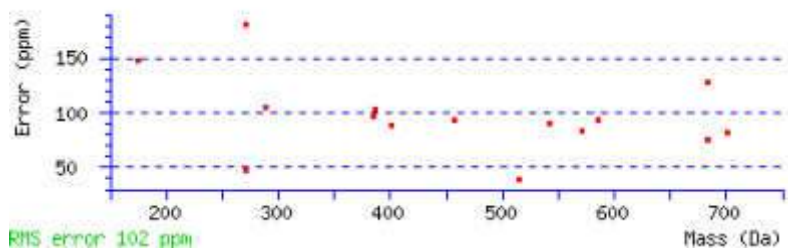

NCBI **BLAST** search of [AAQDALLR](#)

(Parameters: blastp, nr protein database, expect=20000, no filter, PAM30)

Other BLAST [web gateways](#)

#### All matches to this query

| Score | Mr(calc) | Delta   | Sequence                  |
|-------|----------|---------|---------------------------|
| 38.0  | 969.5607 | 0.0333  | <a href="#">AAQDALLR</a>  |
| 38.0  | 969.5607 | 0.0333  | <a href="#">AAQDALLR</a>  |
| 31.3  | 969.6335 | -0.0395 | <a href="#">ITKNLLR</a>   |
| 31.2  | 969.6335 | -0.0395 | <a href="#">ITGKGLIR</a>  |
| 27.3  | 969.6409 | -0.0469 | <a href="#">LVLMLLR</a>   |
| 26.3  | 969.5355 | 0.0584  | <a href="#">NNAQAALLR</a> |
| 26.2  | 969.6335 | -0.0395 | <a href="#">KLSGLAIR</a>  |
| 26.2  | 969.5760 | 0.0180  | <a href="#">QAWLAIR</a>   |
| 25.5  | 969.5681 | 0.0259  | <a href="#">LPDMLLR</a>   |
| 24.3  | 969.5971 | -0.0031 | <a href="#">QTINILLR</a>  |

Mascot: <http://www.matrixscience.com/>



# Mascot Search Results

## Peptide View Spot no 128

### MS/MS Fragmentation of **IVDILTEQK**

Found in **gi|108864048** in **NCBI nr**, Fructose-bisphosphate aldolase, chloroplast precursor, putative, expressed [Oryza sativa Japonica Group]

Match to Query 43: 1057.631124 from(1058.638400,1+) intensity(0.0000) index(9)

Title: Label: K15, Spot\_Id: 219908, Peak\_List\_Id: 228509, MSMS Job\_Run\_Id: 21992, Comment:

Data file C:\Documents and Settings\Administrator\Desktop\Farah-Garima 11May 2013\ppw\_K15\_136868296900.txt

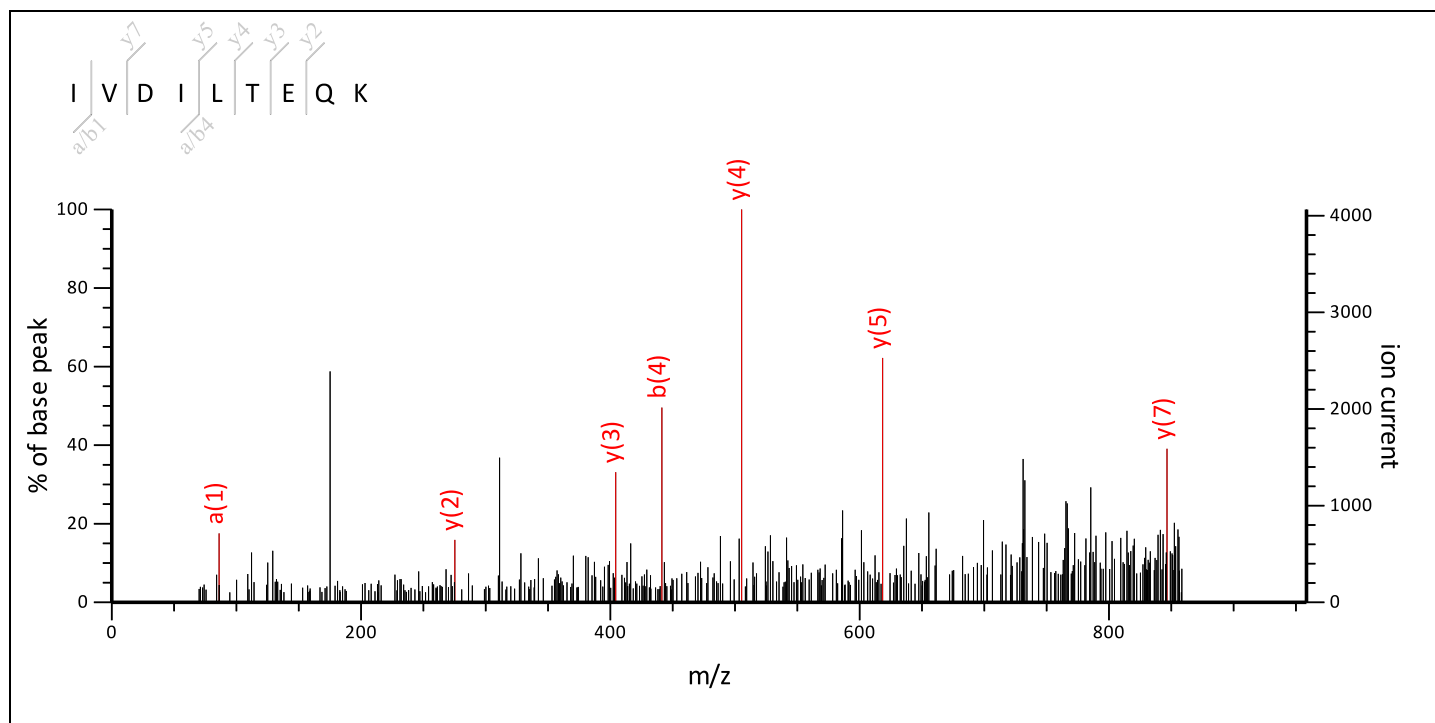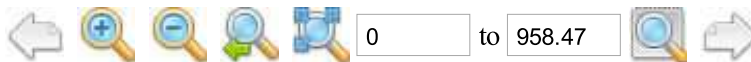

Label all possible matches  Label matches used for scoring

**Monoisotopic mass of neutral peptide Mr(calc):** 1057.6019

**Fixed modifications:** Carbamidomethyl (C) (apply to specified residues or termini only)

**Ions Score:** 19 **Expect:** 23

**Matches:** 7/34 fragment ions using 16 most intense peaks ([help](#))

| # | a        | a* | b        | b* | Seq. | y        | y*       | # |
|---|----------|----|----------|----|------|----------|----------|---|
| 1 | 86.0964  |    | 114.0913 |    | I    |          |          | 9 |
| 2 | 185.1648 |    | 213.1598 |    | V    | 945.5251 | 928.4986 | 8 |
| 3 | 300.1918 |    | 328.1867 |    | D    | 846.4567 | 829.4302 | 7 |
| 4 | 413.2758 |    | 441.2708 |    | I    | 731.4298 | 714.4032 | 6 |
| 5 | 526.3599 |    | 554.3548 |    | L    | 618.3457 | 601.3192 | 5 |
| 6 | 627.4076 |    | 655.4025 |    | T    | 505.2617 | 488.2351 | 4 |
| 7 | 756.4502 |    | 784.4451 |    | E    | 404.2140 | 387.1874 | 3 |



|   |          |          |          |          |   |          |          |   |
|---|----------|----------|----------|----------|---|----------|----------|---|
| 8 | 884.5088 | 867.4822 | 912.5037 | 895.4771 | Q | 275.1714 | 258.1448 | 2 |
| 9 |          |          |          |          | K | 147.1128 | 130.0863 | 1 |

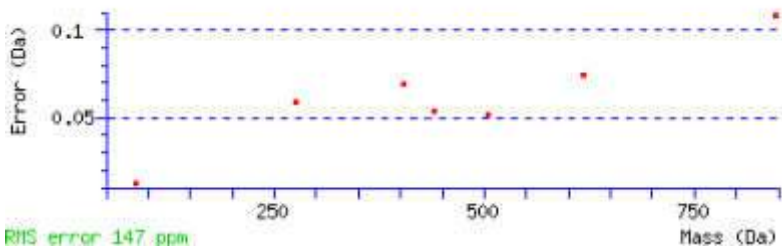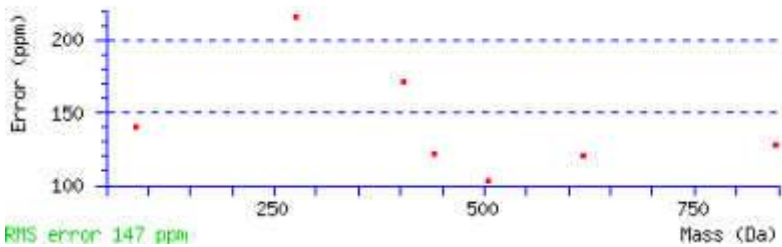

NCBI **BLAST** search of [IVDILTEQK](#)

(Parameters: blastp, nr protein database, expect=20000, no filter, PAM30)

Other BLAST [web gateways](#)

#### All matches to this query

| Score | Mr(calc)  | Delta   | Sequence                    |
|-------|-----------|---------|-----------------------------|
| 23.5  | 1057.5768 | 0.0544  | <a href="#">VIEVLSQDR</a>   |
| 23.5  | 1057.5768 | 0.0544  | <a href="#">VLDLLQSDR</a>   |
| 23.5  | 1057.6318 | -0.0006 | <a href="#">VLVELAMKR</a>   |
| 19.0  | 1057.5603 | 0.0708  | <a href="#">RHFLVCAR</a>    |
| 18.9  | 1057.6019 | 0.0292  | <a href="#">IVDILTEQK</a>   |
| 18.9  | 1057.6318 | -0.0006 | <a href="#">IVNNIVMKK</a>   |
| 18.5  | 1057.5597 | 0.0714  | <a href="#">QFQTIFFK</a>    |
| 13.8  | 1057.6495 | -0.0184 | <a href="#">LLTLGSSVR</a>   |
| 13.5  | 1057.5768 | 0.0544  | <a href="#">IVNNIGDVSK</a>  |
| 12.9  | 1057.5628 | 0.0683  | <a href="#">RAVAAGESAAR</a> |

Mascot: <http://www.matrixscience.com/>



# Mascot Search Results

## Peptide View Spot no 128

MS/MS Fragmentation of **TWGGQENVK**

Found in **gi|108864048** in **NCBI nr**, Fructose-bisphosphate aldolase, chloroplast precursor, putative, expressed [Oryza sativa Japonica Group]

Match to Query 59: 1114.579024 from(1115.586300,1+) intensity(0.0000) index(13)

Title: Label: K15, Spot\_Id: 219908, Peak\_List\_Id: 228501, MSMS Job\_Run\_Id: 21992, Comment:

Data file C:\Documents and Settings\Administrator\Desktop\Farah-Garima 11May 2013\ppw\_K15\_136868296900.txt

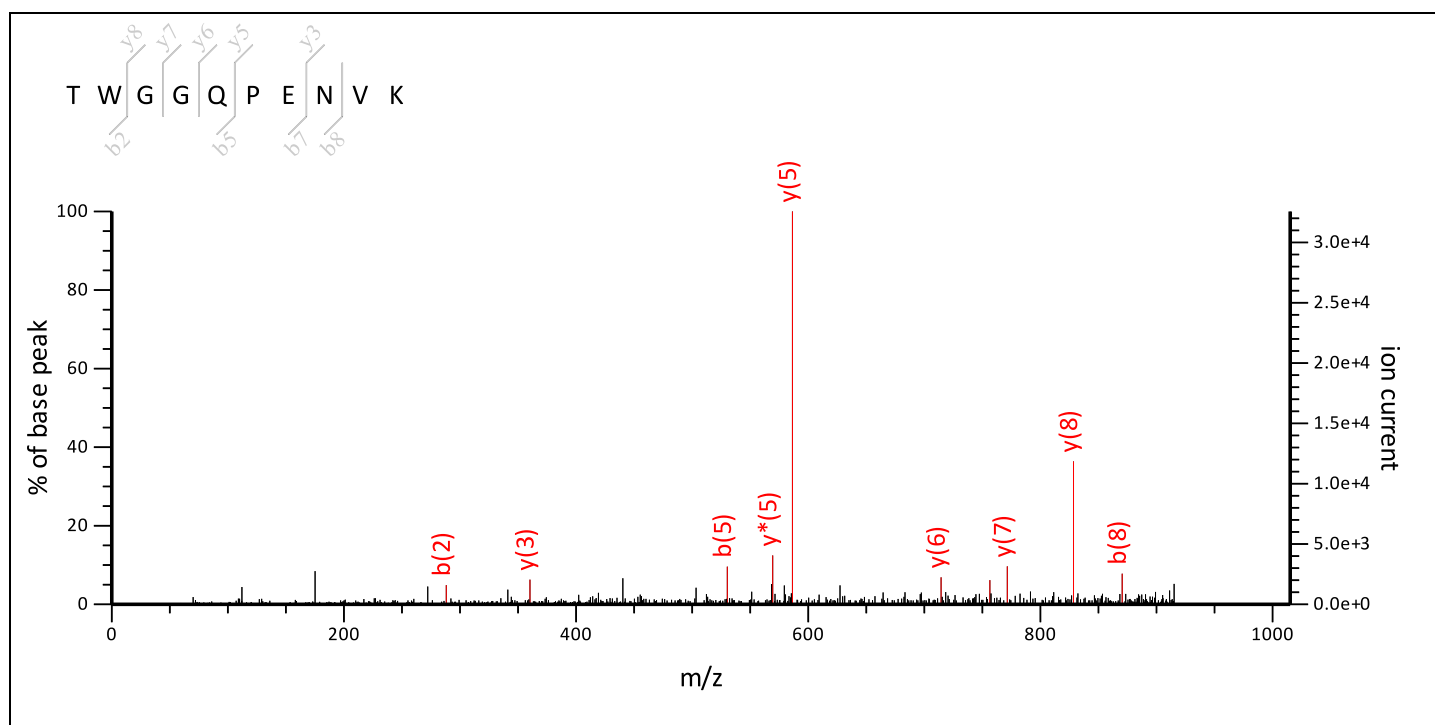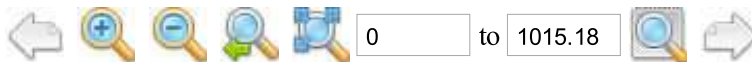

Label all possible matches  Label matches used for scoring

**Monoisotopic mass of neutral peptide Mr(calc):** 1114.5407

**Fixed modifications:** Carbamidomethyl (C) (apply to specified residues or termini only)

**Ions Score:** 31 **Expect:** 2.1

**Matches:** 10/46 fragment ions using 18 most intense peaks ([help](#))

| # | a        | a*       | b               | b*       | Seq. | y               | y*              | #  |
|---|----------|----------|-----------------|----------|------|-----------------|-----------------|----|
| 1 | 74.0600  |          | 102.0550        |          | T    |                 |                 | 10 |
| 2 | 260.1394 |          | <b>288.1343</b> |          | W    | 1014.5003       | 997.4738        | 9  |
| 3 | 317.1608 |          | 345.1557        |          | G    | <b>828.4210</b> | 811.3945        | 8  |
| 4 | 374.1823 |          | 402.1772        |          | G    | <b>771.3995</b> | 754.3730        | 7  |
| 5 | 502.2409 | 485.2143 | <b>530.2358</b> | 513.2092 | Q    | <b>714.3781</b> | 697.3515        | 6  |
| 6 | 599.2936 | 582.2671 | 627.2885        | 610.2620 | P    | <b>586.3195</b> | <b>569.2930</b> | 5  |
| 7 | 728.3362 | 711.3097 | <b>756.3311</b> | 739.3046 | E    | 489.2667        | 472.2402        | 4  |

|    |          |          |                 |          |   |                 |          |   |
|----|----------|----------|-----------------|----------|---|-----------------|----------|---|
| 8  | 842.3791 | 825.3526 | <b>870.3741</b> | 853.3475 | N | <b>360.2241</b> | 343.1976 | 3 |
| 9  | 941.4476 | 924.4210 | 969.4425        | 952.4159 | V | 246.1812        | 229.1547 | 2 |
| 10 |          |          |                 |          | K | 147.1128        | 130.0863 | 1 |

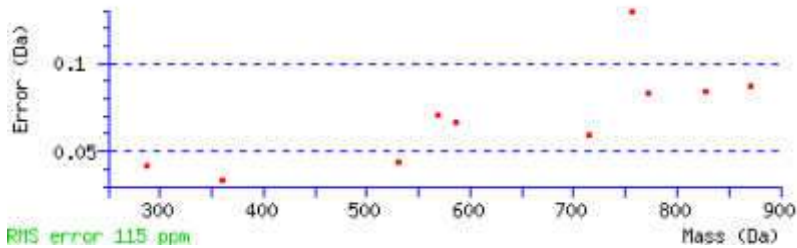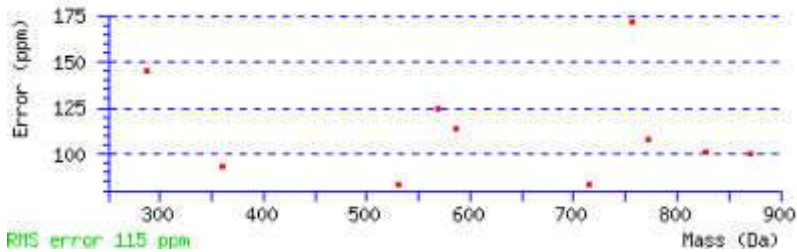

NCBI **BLAST** search of [TWGGQPENVK](#)

(Parameters: blastp, nr protein database, expect=20000, no filter, PAM30)

Other BLAST [web gateways](#)

#### All matches to this query

| Score | Mr(calc)  | Delta   | Sequence                     |
|-------|-----------|---------|------------------------------|
| 30.6  | 1114.5407 | 0.0383  | <a href="#">TWGGQPENVK</a>   |
| 25.9  | 1114.5804 | -0.0014 | <a href="#">MNKPDIEIR</a>    |
| 25.9  | 1114.6532 | -0.0742 | <a href="#">AKAMALELLR</a>   |
| 25.9  | 1114.6094 | -0.0304 | <a href="#">ISSNKPLSNR</a>   |
| 24.2  | 1114.5991 | -0.0201 | <a href="#">MPLMLQNIK</a>    |
| 24.1  | 1114.6095 | -0.0304 | <a href="#">QTLDKAGGGLR</a>  |
| 23.3  | 1114.5731 | 0.0060  | <a href="#">AISGSNPSGVAR</a> |
| 23.0  | 1114.6346 | -0.0556 | <a href="#">DATELVAKLR</a>   |
| 22.6  | 1114.5618 | 0.0172  | <a href="#">DEDGLGALGLR</a>  |
| 22.2  | 1114.6207 | -0.0417 | <a href="#">SSARAGNVVVR</a>  |

Mascot: <http://www.matrixscience.com/>



# Mascot Search Results

## Peptide View Spot no 128

### MS/MS Fragmentation of **EAAYYQQGAR**

Found in **gi|108864048** in **NCBIInr**, Fructose-bisphosphate aldolase, chloroplast precursor, putative, expressed [Oryza sativa Japonica Group]

Match to Query 73: 1155.574624 from(1156.581900,1+) intensity(0.0000) index(15)

Title: Label: K15, Spot\_Id: 219908, Peak\_List\_Id: 228495, MSMS Job\_Run\_Id: 21992, Comment:

Data file C:\Documents and Settings\Administrator\Desktop\Farah-Garima 11May 2013\ppw\_K15\_136868296900.txt

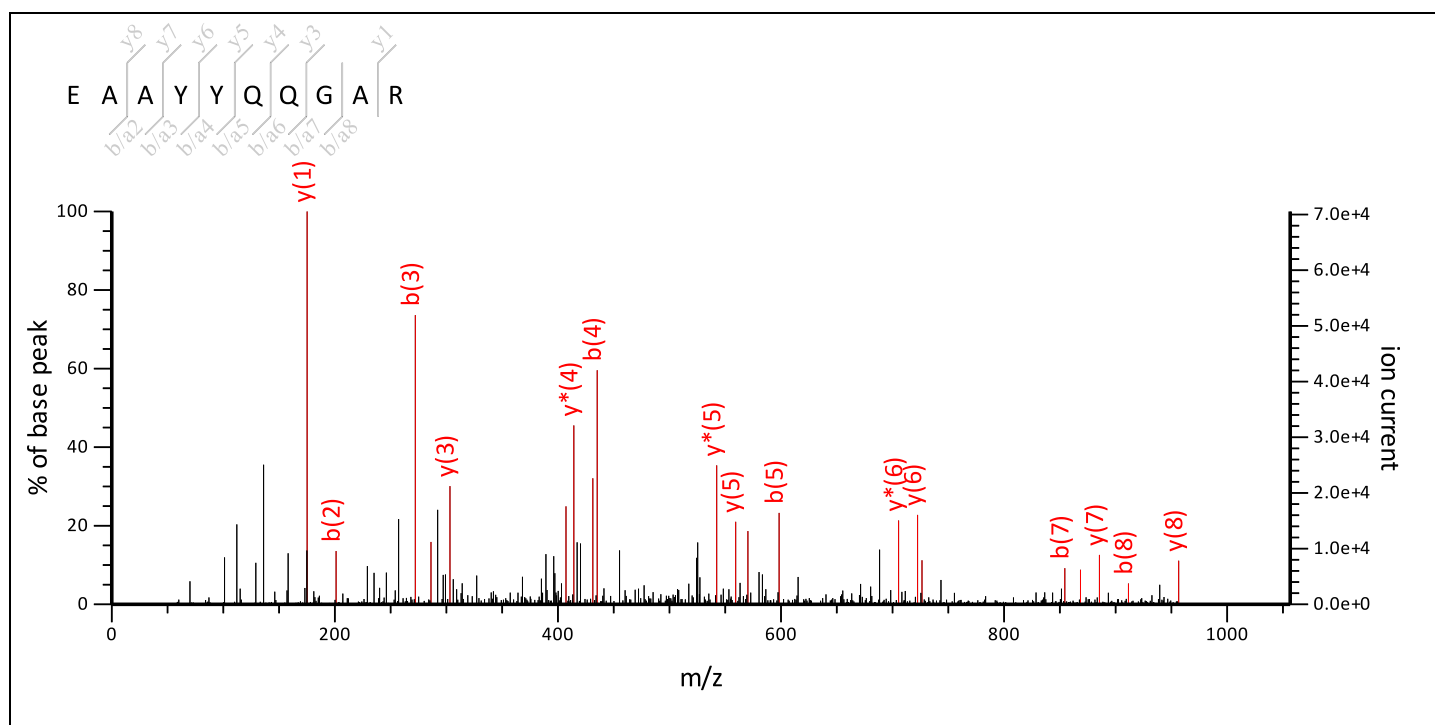

Label all possible matches  Label matches used for scoring

**Monoisotopic mass of neutral peptide Mr(calc):** 1155.5309

**Fixed modifications:** Carbamidomethyl (C) (apply to specified residues or termini only)

**Ions Score:** 48 **Expect:** 0.034

**Matches:** 21/44 fragment ions using 36 most intense peaks ([help](#))

| # | a        | a*       | b        | b*       | Seq. | y         | y*        | #  |
|---|----------|----------|----------|----------|------|-----------|-----------|----|
| 1 | 102.0550 |          | 130.0499 |          | E    |           |           | 10 |
| 2 | 173.0921 |          | 201.0870 |          | A    | 1027.4956 | 1010.4690 | 9  |
| 3 | 244.1292 |          | 272.1241 |          | A    | 956.4585  | 939.4319  | 8  |
| 4 | 407.1925 |          | 435.1874 |          | Y    | 885.4213  | 868.3948  | 7  |
| 5 | 570.2558 |          | 598.2508 |          | Y    | 722.3580  | 705.3315  | 6  |
| 6 | 698.3144 | 681.2879 | 726.3093 | 709.2828 | Q    | 559.2947  | 542.2681  | 5  |
| 7 | 826.3730 | 809.3464 | 854.3679 | 837.3414 | Q    | 431.2361  | 414.2096  | 4  |

|    |          |          |                 |          |          |                 |                 |          |
|----|----------|----------|-----------------|----------|----------|-----------------|-----------------|----------|
| 8  | 883.3945 | 866.3679 | <b>911.3894</b> | 894.3628 | <b>G</b> | <b>303.1775</b> | <b>286.1510</b> | <b>3</b> |
| 9  | 954.4316 | 937.4050 | 982.4265        | 965.3999 | <b>A</b> | 246.1561        | 229.1295        | <b>2</b> |
| 10 |          |          |                 |          | <b>R</b> | <b>175.1190</b> | 158.0924        | <b>1</b> |

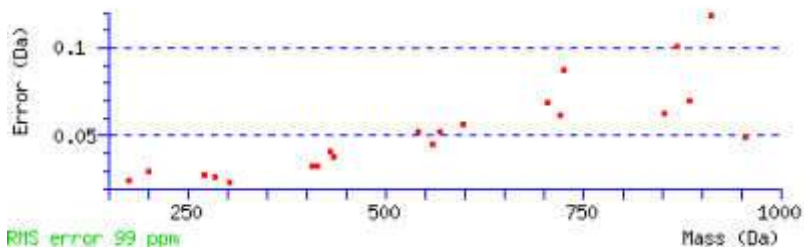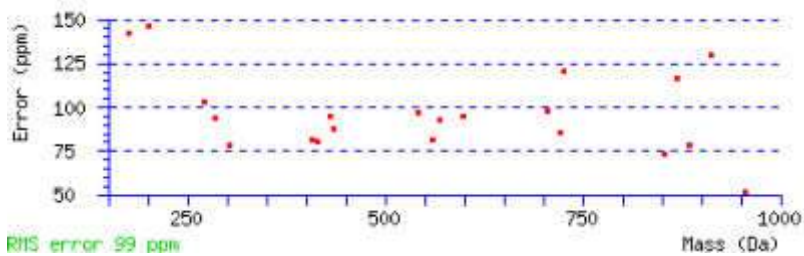

NCBI **BLAST** search of [EAAYYQOGAR](#)

(Parameters: blastp, nr protein database, expect=20000, no filter, PAM30)

Other BLAST [web gateways](#)

#### All matches to this query

| Score | Mr(calc)  | Delta   | Sequence                    |
|-------|-----------|---------|-----------------------------|
| 48.4  | 1155.5309 | 0.0438  | <a href="#">EAAYYQOGAR</a>  |
| 35.7  | 1155.5672 | 0.0074  | <a href="#">AAEYKQGAR</a>   |
| 26.4  | 1155.6472 | -0.0726 | <a href="#">LSAGQIRQQR</a>  |
| 23.9  | 1155.6288 | -0.0542 | <a href="#">TLGSISYFLR</a>  |
| 21.9  | 1155.5745 | 0.0002  | <a href="#">ROPSEQQQR</a>   |
| 21.8  | 1155.5931 | -0.0185 | <a href="#">RGCPAAGAGAR</a> |
| 21.8  | 1155.5996 | -0.0250 | <a href="#">QVLQEQQQR</a>   |
| 20.9  | 1155.5924 | -0.0178 | <a href="#">ISAYTEGFLR</a>  |
| 20.5  | 1155.5455 | 0.0292  | <a href="#">SSPRMDPNPR</a>  |
| 19.4  | 1155.6108 | -0.0362 | <a href="#">QAQAQAQKAGR</a> |

Mascot: <http://www.matrixscience.com/>



# Mascot Search Results

## Peptide View Spot no 128

MS/MS Fragmentation of **KIVDILTEQK**

Found in **gi|108864048** in **NCBIInr**, Fructose-bisphosphate aldolase, chloroplast precursor, putative, expressed [Oryza sativa Japonica Group]

Match to Query 81: 1185.734224 from(1186.741500,1+) intensity(0.0000) index(17)

Title: Label: K15, Spot\_Id: 219908, Peak\_List\_Id: 228507, MSMS Job\_Run\_Id: 21992, Comment:

Data file C:\Documents and Settings\Administrator\Desktop\Farah-Garima 11May 2013\ppw\_K15\_136868296900.txt

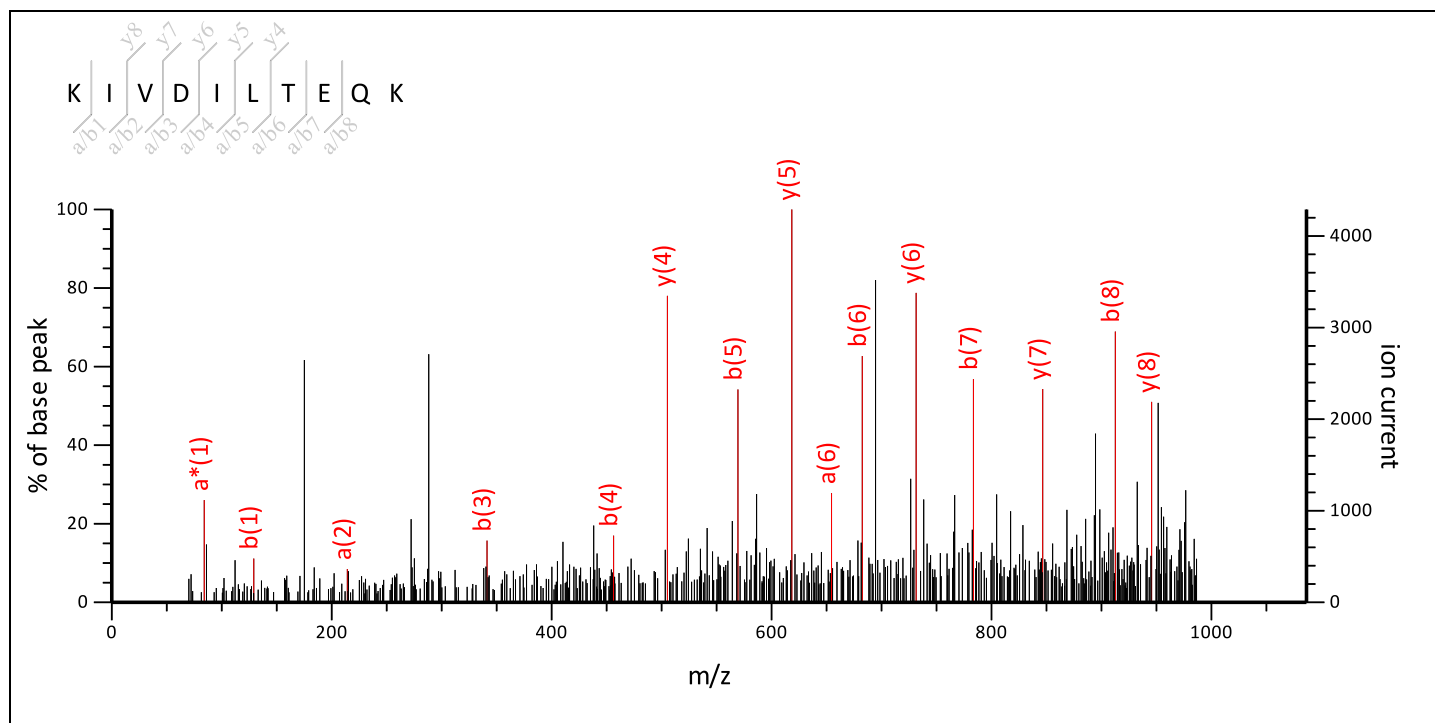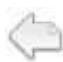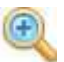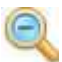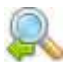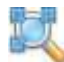

0

to 1086.44

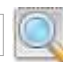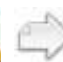

Label all possible matches  Label matches used for scoring

**Monoisotopic mass of neutral peptide Mr(calc):** 1185.6969

**Fixed modifications:** Carbamidomethyl (C) (apply to specified residues or termini only)

**Ions Score:** 39 **Expect:** 0.14

**Matches :** 15/54 fragment ions using 30 most intense peaks ([help](#))

| # | a        | a*       | b        | b*       | Seq. | y         | y*        | #  |
|---|----------|----------|----------|----------|------|-----------|-----------|----|
| 1 | 101.1073 | 84.0808  | 129.1022 | 112.0757 | K    |           |           | 10 |
| 2 | 214.1914 | 197.1648 | 242.1863 | 225.1598 | I    | 1058.6092 | 1041.5827 | 9  |
| 3 | 313.2598 | 296.2333 | 341.2547 | 324.2282 | V    | 945.5251  | 928.4986  | 8  |
| 4 | 428.2867 | 411.2602 | 456.2817 | 439.2551 | D    | 846.4567  | 829.4302  | 7  |
| 5 | 541.3708 | 524.3443 | 569.3657 | 552.3392 | I    | 731.4298  | 714.4032  | 6  |
| 6 | 654.4549 | 637.4283 | 682.4498 | 665.4232 | L    | 618.3457  | 601.3192  | 5  |
| 7 | 755.5026 | 738.4760 | 783.4975 | 766.4709 | T    | 505.2617  | 488.2351  | 4  |

|    |           |          |                 |           |   |          |          |   |
|----|-----------|----------|-----------------|-----------|---|----------|----------|---|
| 8  | 884.5451  | 867.5186 | <b>912.5401</b> | 895.5135  | E | 404.2140 | 387.1874 | 3 |
| 9  | 1012.6037 | 995.5772 | 1040.5986       | 1023.5721 | Q | 275.1714 | 258.1448 | 2 |
| 10 |           |          |                 |           | K | 147.1128 | 130.0863 | 1 |

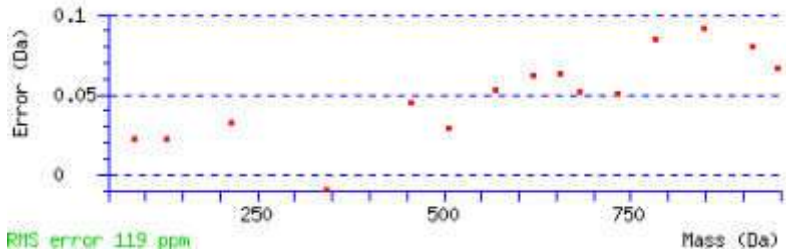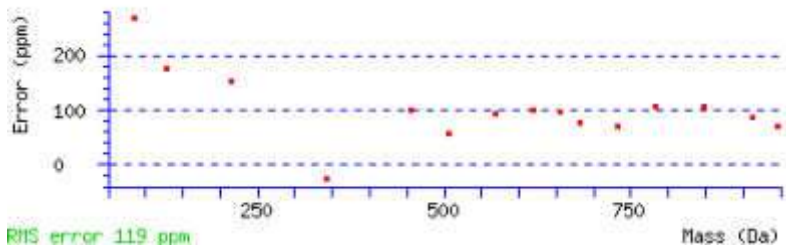

NCBI **BLAST** search of [KIVDILTEQK](#)

(Parameters: blastp, nr protein database, expect=20000, no filter, PAM30)

Other BLAST [web gateways](#)

#### All matches to this query

| Score | Mr(calc)  | Delta   | Sequence                    |
|-------|-----------|---------|-----------------------------|
| 39.5  | 1185.6969 | 0.0374  | <a href="#">KIVDILTEQK</a>  |
| 17.8  | 1185.6362 | 0.0980  | <a href="#">VIPQMIGCIR</a>  |
| 16.3  | 1185.6692 | 0.0650  | <a href="#">NPLMLFAKPR</a>  |
| 16.2  | 1185.6466 | 0.0876  | <a href="#">QLVDGTRELR</a>  |
| 14.3  | 1185.6367 | 0.0976  | <a href="#">HHEELIPRR</a>   |
| 13.5  | 1185.6328 | 0.1014  | <a href="#">QLVPMWSIGR</a>  |
| 13.3  | 1185.6539 | 0.0803  | <a href="#">IMASNTLLAPR</a> |
| 12.7  | 1185.6466 | 0.0876  | <a href="#">IQLTLGGQGSR</a> |
| 11.7  | 1185.7737 | -0.0394 | <a href="#">KLTILLYLLP</a>  |
| 11.7  | 1185.7332 | 0.0010  | <a href="#">QIITLLSSIAK</a> |

Mascot: <http://www.matrixscience.com/>





# Mascot Search Results

## Peptide View **Spot no 128**

MS/MS Fragmentation of **ATPEQVSDYTLK**

Found in **gi|108864048** in **NCBI nr**, Fructose-bisphosphate aldolase, chloroplast precursor, putative, expressed [Oryza sativa Japonica Group]

Match to Query 97: 1350.713224 from(1351.720500,1+) intensity(0.0000) index(20)

Title: Label: K15, Spot\_Id: 219908, Peak\_List\_Id: 228506, MSMS Job\_Run\_Id: 21992, Comment:

Data file C:\Documents and Settings\Administrator\Desktop\Farah-Garima 11May 2013\ppw\_K15\_136868296900.txt

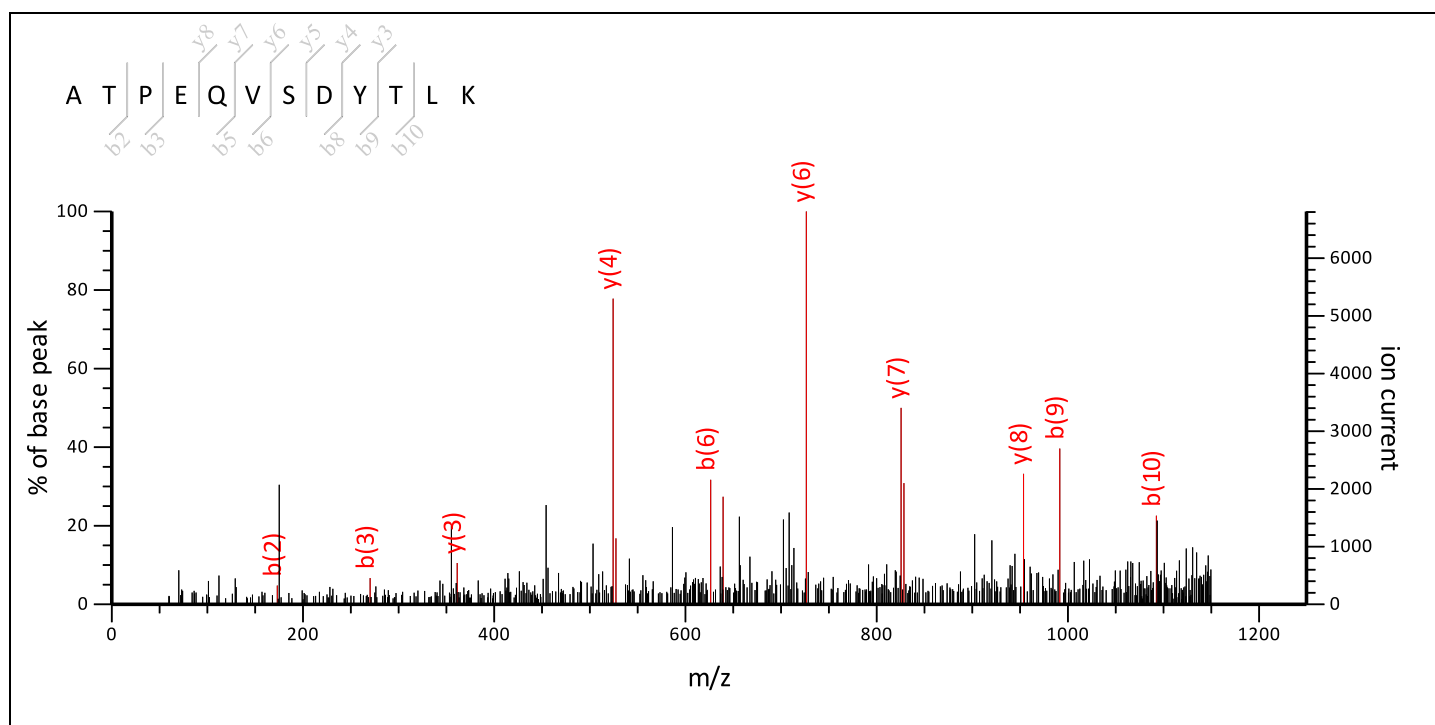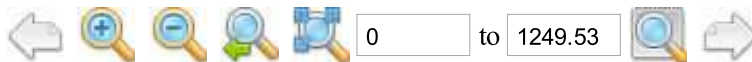

Label all possible matches  Label matches used for scoring

**Monoisotopic mass of neutral peptide Mr(calc):** 1350.6667

**Fixed modifications:** Carbamidomethyl (C) (apply to specified residues or termini only)

**Ions Score:** 50 **Expect:** 0.019

**Matches :** 13/58 fragment ions using 22 most intense peaks ([help](#))

| # | a        | a*       | b        | b*       | Seq. | y         | y*        | #  |
|---|----------|----------|----------|----------|------|-----------|-----------|----|
| 1 | 44.0495  |          | 72.0444  |          | A    |           |           | 12 |
| 2 | 145.0972 |          | 173.0921 |          | T    | 1280.6369 | 1263.6103 | 11 |
| 3 | 242.1499 |          | 270.1448 |          | P    | 1179.5892 | 1162.5626 | 10 |
| 4 | 371.1925 |          | 399.1874 |          | E    | 1082.5364 | 1065.5099 | 9  |
| 5 | 499.2511 | 482.2245 | 527.2460 | 510.2195 | Q    | 953.4938  | 936.4673  | 8  |
| 6 | 598.3195 | 581.2930 | 626.3144 | 609.2879 | V    | 825.4353  | 808.4087  | 7  |
| 7 | 685.3515 | 668.3250 | 713.3464 | 696.3199 | S    | 726.3668  | 709.3403  | 6  |

|    |           |           |                  |           |   |                 |          |   |
|----|-----------|-----------|------------------|-----------|---|-----------------|----------|---|
| 8  | 800.3785  | 783.3519  | <b>828.3734</b>  | 811.3468  | D | <b>639.3348</b> | 622.3083 | 5 |
| 9  | 963.4418  | 946.4153  | <b>991.4367</b>  | 974.4102  | Y | <b>524.3079</b> | 507.2813 | 4 |
| 10 | 1064.4895 | 1047.4629 | <b>1092.4844</b> | 1075.4578 | T | <b>361.2445</b> | 344.2180 | 3 |
| 11 | 1177.5735 | 1160.5470 | 1205.5685        | 1188.5419 | L | 260.1969        | 243.1703 | 2 |
| 12 |           |           |                  |           | K | 147.1128        | 130.0863 | 1 |

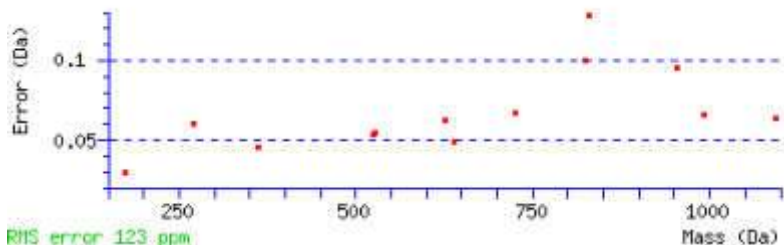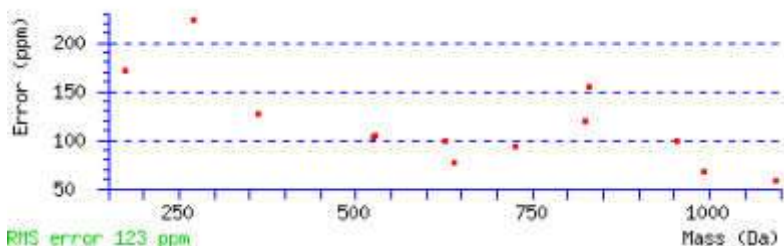

NCBI **BLAST** search of [ATPEQVSDYTLK](#)

(Parameters: blastp, nr protein database, expect=20000, no filter, PAM30)

Other BLAST [web gateways](#)

#### All matches to this query

| Score | Mr(calc)  | Delta   | Sequence                      |
|-------|-----------|---------|-------------------------------|
| 50.2  | 1350.6667 | 0.0465  | <a href="#">ATPEQVSDYTLK</a>  |
| 11.6  | 1350.5883 | 0.1249  | <a href="#">MTVMMDWIHR</a>    |
| 11.1  | 1350.7329 | -0.0197 | <a href="#">RVSLAVYMLGDK</a>  |
| 10.8  | 1350.6384 | 0.0749  | <a href="#">QMTAAMELRER</a>   |
| 8.8   | 1350.7118 | 0.0014  | <a href="#">EKVGIVFMSWR</a>   |
| 8.1   | 1350.6891 | 0.0241  | <a href="#">LKNAAAGTTEYGR</a> |
| 8.0   | 1350.7296 | -0.0163 | <a href="#">LRAQFPDYTIK</a>   |
| 7.6   | 1350.7296 | -0.0163 | <a href="#">ALKWLDYSVR</a>    |
| 7.6   | 1350.7116 | 0.0016  | <a href="#">LRQEQAISHGGR</a>  |
| 7.3   | 1350.7368 | -0.0236 | <a href="#">ELVGGNGVPPRTR</a> |

Mascot: <http://www.matrixscience.com/>



# Mascot Search Results

## Peptide View Spot no 128

MS/MS Fragmentation of **TVVSIPNGPSELAVK**

Found in **gi|108864048** in **NCBI nr**, Fructose-bisphosphate aldolase, chloroplast precursor, putative, expressed [Oryza sativa Japonica Group]

Match to Query 109: 1509.888924 from(1510.896200,1+) intensity(0.0000) index(23)

Title: Label: K15, Spot\_Id: 219908, Peak\_List\_Id: 228500, MSMS Job\_Run\_Id: 21992, Comment:

Data file C:\Documents and Settings\Administrator\Desktop\Farah-Garima 11May 2013\ppw\_K15\_136868296900.txt

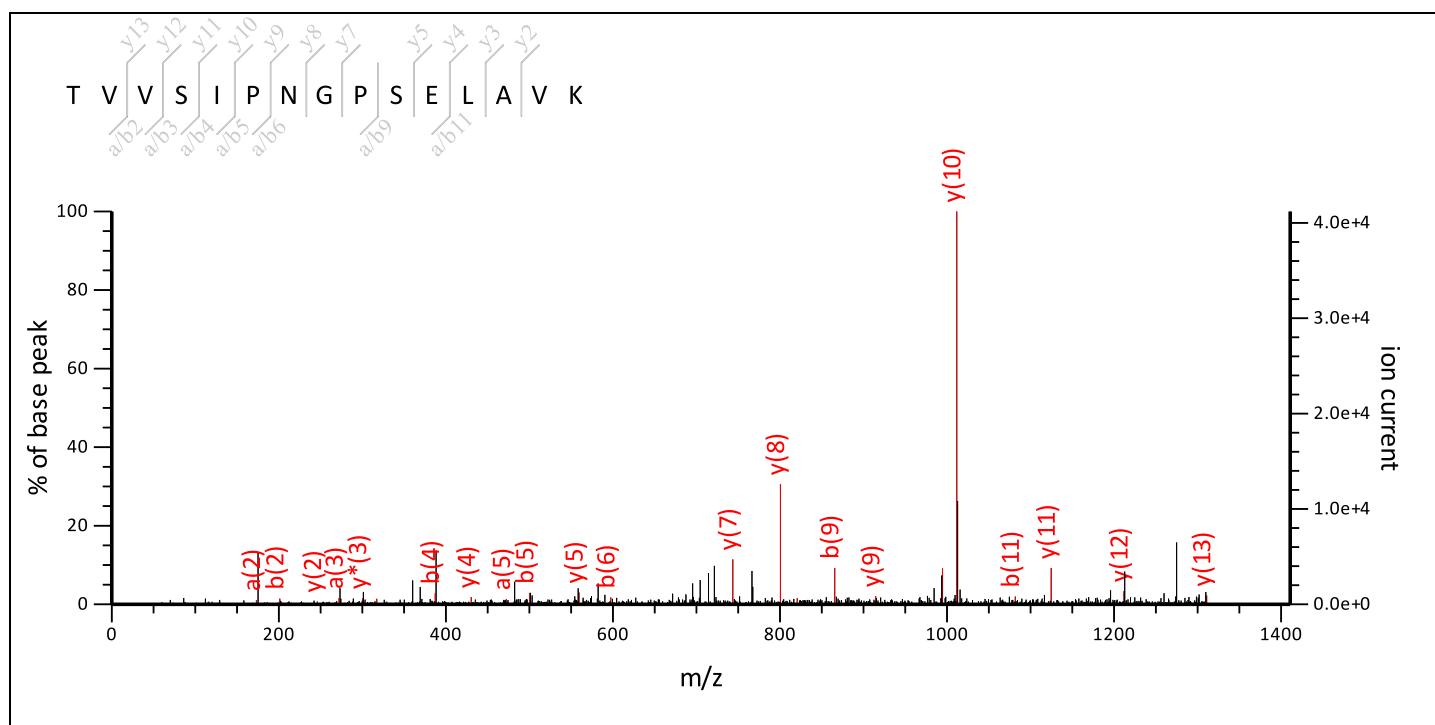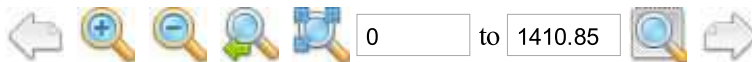

Label all possible matches  Label matches used for scoring

**Monoisotopic mass of neutral peptide Mr(calc):** 1509.8403

**Fixed modifications:** Carbamidomethyl (C) (apply to specified residues or termini only)

**Ions Score:** 30 **Expect:** 1.3

**Matches :** 24/72 fragment ions using 104 most intense peaks ([help](#))

| # | a        | a*       | b        | b*       | Seq. | y         | y*        | #  |
|---|----------|----------|----------|----------|------|-----------|-----------|----|
| 1 | 74.0600  |          | 102.0550 |          | T    |           |           | 15 |
| 2 | 173.1285 |          | 201.1234 |          | V    | 1409.7999 | 1392.7733 | 14 |
| 3 | 272.1969 |          | 300.1918 |          | V    | 1310.7314 | 1293.7049 | 13 |
| 4 | 359.2289 |          | 387.2238 |          | S    | 1211.6630 | 1194.6365 | 12 |
| 5 | 472.3130 |          | 500.3079 |          | I    | 1124.6310 | 1107.6045 | 11 |
| 6 | 569.3657 |          | 597.3606 |          | P    | 1011.5469 | 994.5204  | 10 |
| 7 | 683.4087 | 666.3821 | 711.4036 | 694.3770 | N    | 914.4942  | 897.4676  | 9  |

|    |           |           |           |           |   |          |          |   |
|----|-----------|-----------|-----------|-----------|---|----------|----------|---|
| 8  | 740.4301  | 723.4036  | 768.4250  | 751.3985  | G | 800.4512 | 783.4247 | 8 |
| 9  | 837.4829  | 820.4563  | 865.4778  | 848.4512  | P | 743.4298 | 726.4032 | 7 |
| 10 | 924.5149  | 907.4884  | 952.5098  | 935.4833  | S | 646.3770 | 629.3505 | 6 |
| 11 | 1053.5575 | 1036.5310 | 1081.5524 | 1064.5259 | E | 559.3450 | 542.3184 | 5 |
| 12 | 1166.6416 | 1149.6150 | 1194.6365 | 1177.6099 | L | 430.3024 | 413.2758 | 4 |
| 13 | 1237.6787 | 1220.6521 | 1265.6736 | 1248.6470 | A | 317.2183 | 300.1918 | 3 |
| 14 | 1336.7471 | 1319.7205 | 1364.7420 | 1347.7155 | V | 246.1812 | 229.1547 | 2 |
| 15 |           |           |           |           | K | 147.1128 | 130.0863 | 1 |

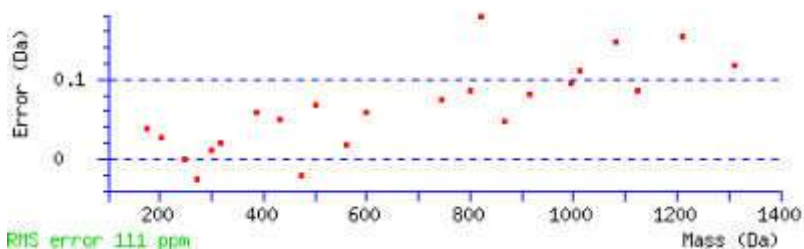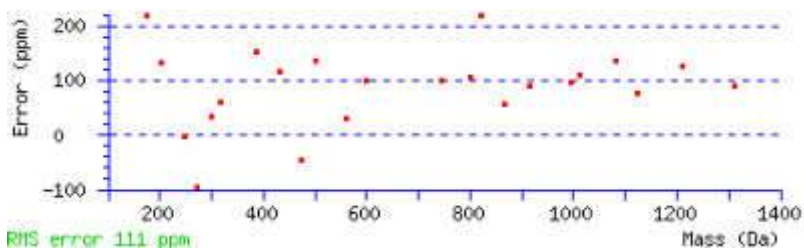

NCBI BLAST search of [TVVSIPNGPSELAVK](#)

(Parameters: blastp, nr protein database, expect=20000, no filter, PAM30)

Other BLAST [web gateways](#)

#### All matches to this query

| Score | Mr(calc)  | Delta  | Sequence                        |
|-------|-----------|--------|---------------------------------|
| 29.9  | 1509.8403 | 0.0487 | <a href="#">TVVSIPNGPSELAVK</a> |
| 17.0  | 1509.8164 | 0.0725 | <a href="#">AQVAEFLHNIRGR</a>   |
| 12.4  | 1509.8450 | 0.0440 | <a href="#">QCLPSVTRPLALR</a>   |
| 11.6  | 1509.8263 | 0.0626 | <a href="#">SIQGISHTSIQLAR</a>  |
| 9.2   | 1509.8337 | 0.0552 | <a href="#">MNLAVAAALPSVTPR</a> |
| 9.1   | 1509.7787 | 0.1102 | <a href="#">DLSSPTPPTKQSPR</a>  |
| 8.8   | 1509.8450 | 0.0440 | <a href="#">IVEQCRGVPLAIR</a>   |
| 8.8   | 1509.7827 | 0.1062 | <a href="#">IDKEEFYNLALR</a>    |
| 8.3   | 1509.7787 | 0.1102 | <a href="#">EQELPINQGDIVR</a>   |
| 8.0   | 1509.8151 | 0.0738 | <a href="#">LENDNLTPNLVLR</a>   |

Mascot: <http://www.matrixscience.com/>



# Mascot Search Results

## Peptide View Spot no 128

MS/MS Fragmentation of **LASIGLENTEANR**

Found in **gi|108864048** in **NCBI**nr, Fructose-bisphosphate aldolase, chloroplast precursor, putative, expressed [Oryza sativa Japonica Group]

Match to Query 102: 1386.768724 from(1387.776000,1+) intensity(0.0000) index(22)

Title: Label: K15, Spot\_Id: 219908, Peak\_List\_Id: 228497, MSMS Job\_Run\_Id: 21992, Comment:

Data file C:\Documents and Settings\Administrator\Desktop\Farah-Garima 11May 2013\ppw\_K15\_136868296900.txt

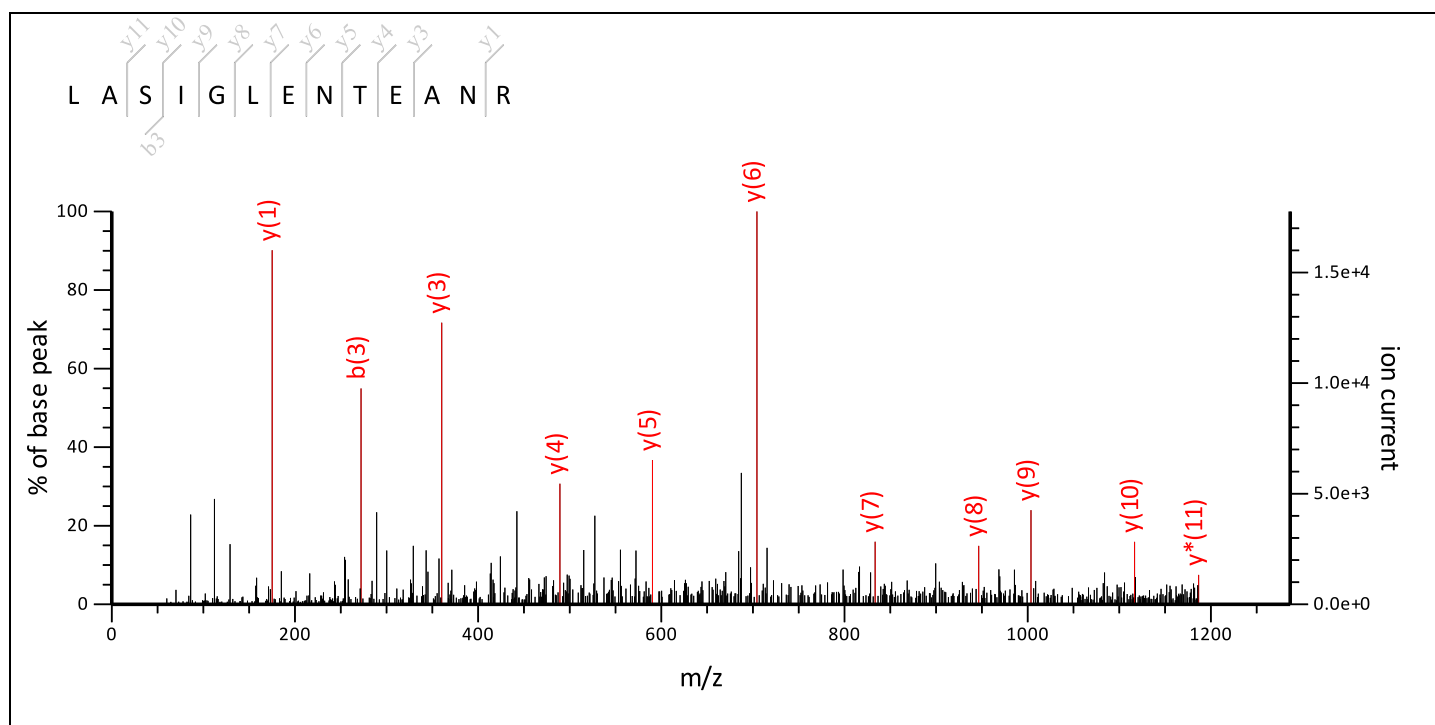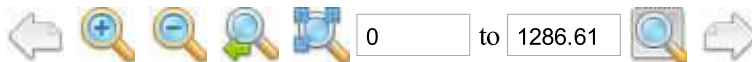

Label all possible matches  Label matches used for scoring

**Monoisotopic mass of neutral peptide Mr(calc):** 1386.7103

**Fixed modifications:** Carbamidomethyl (C) (apply to specified residues or termini only)

**Ions Score:** 92 **Expect:** 1.2e-06

**Matches :** 12/58 fragment ions using 12 most intense peaks ([help](#))

| # | a        | a* | b               | b* | Seq. | y                | y*               | #  |
|---|----------|----|-----------------|----|------|------------------|------------------|----|
| 1 | 86.0964  |    | 114.0913        |    | L    |                  |                  | 13 |
| 2 | 157.1335 |    | 185.1285        |    | A    | 1274.6335        | 1257.6070        | 12 |
| 3 | 244.1656 |    | <b>272.1605</b> |    | S    | 1203.5964        | <b>1186.5699</b> | 11 |
| 4 | 357.2496 |    | 385.2445        |    | I    | <b>1116.5644</b> | 1099.5378        | 10 |
| 5 | 414.2711 |    | 442.2660        |    | G    | <b>1003.4803</b> | 986.4538         | 9  |
| 6 | 527.3552 |    | 555.3501        |    | L    | <b>946.4588</b>  | 929.4323         | 8  |
| 7 | 656.3978 |    | 684.3927        |    | E    | <b>833.3748</b>  | 816.3482         | 7  |

|    |           |           |           |           |   |                 |                 |   |
|----|-----------|-----------|-----------|-----------|---|-----------------|-----------------|---|
| 8  | 770.4407  | 753.4141  | 798.4356  | 781.4090  | N | <b>704.3322</b> | 687.3056        | 6 |
| 9  | 871.4884  | 854.4618  | 899.4833  | 882.4567  | T | <b>590.2893</b> | 573.2627        | 5 |
| 10 | 1000.5310 | 983.5044  | 1028.5259 | 1011.4993 | E | <b>489.2416</b> | 472.2150        | 4 |
| 11 | 1071.5681 | 1054.5415 | 1099.5630 | 1082.5364 | A | <b>360.1990</b> | 343.1724        | 3 |
| 12 | 1185.6110 | 1168.5844 | 1213.6059 | 1196.5794 | N | 289.1619        | <b>272.1353</b> | 2 |
| 13 |           |           |           |           | R | <b>175.1190</b> | 158.0924        | 1 |

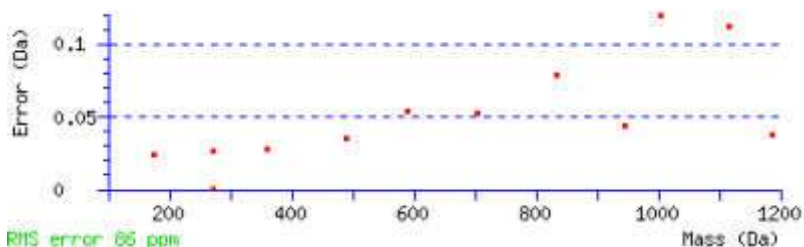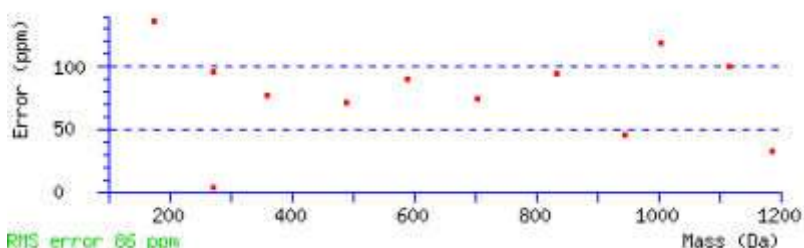

NCBI BLAST search of [LASIGLENTEANR](#)

(Parameters: blastp, nr protein database, expect=20000, no filter, PAM30)

Other BLAST [web gateways](#)

#### All matches to this query

| Score | Mr(calc)  | Delta   | Sequence                       |
|-------|-----------|---------|--------------------------------|
| 92.1  | 1386.7103 | 0.0585  | <a href="#">LASIGLENTEANR</a>  |
| 22.8  | 1386.7255 | 0.0432  | <a href="#">LADAVIAGANPGYR</a> |
| 20.3  | 1386.6851 | 0.0836  | <a href="#">RDAATGVLDANER</a>  |
| 16.4  | 1386.7653 | 0.0034  | <a href="#">LASGLLLEMRRER</a>  |
| 16.0  | 1386.7289 | 0.0398  | <a href="#">TLGLGDQKPTAMR</a>  |
| 15.0  | 1386.8711 | -0.1024 | <a href="#">IIDIHKIIIGLPR</a>  |
| 15.0  | 1386.7871 | -0.0184 | <a href="#">ILGYLSEGLGLPR</a>  |
| 14.8  | 1386.7103 | 0.0584  | <a href="#">LASIGVENVESNR</a>  |
| 14.2  | 1386.8169 | -0.0482 | <a href="#">ISALPAMLIFRR</a>   |
| 14.2  | 1386.7103 | 0.0584  | <a href="#">DQIVQTLTEAGGR</a>  |

Mascot: <http://www.matrixscience.com/>



# Mascot Search Results

## Peptide View Spot no 128

### MS/MS Fragmentation of **RLASIGLENTAANR**

Found in **gi|108864048** in **NCBI nr**, Fructose-bisphosphate aldolase, chloroplast precursor, putative, expressed [Oryza sativa Japonica Group]

Match to Query 113: 1542.876224 from(1543.883500,1+) intensity(0.0000) index(24)

Title: Label: K15, Spot\_Id: 219908, Peak\_List\_Id: 228508, MSMS Job\_Run\_Id: 21992, Comment:

Data file C:\Documents and Settings\Administrator\Desktop\Farah-Garima 11May 2013\ppw\_K15\_136868296900.txt

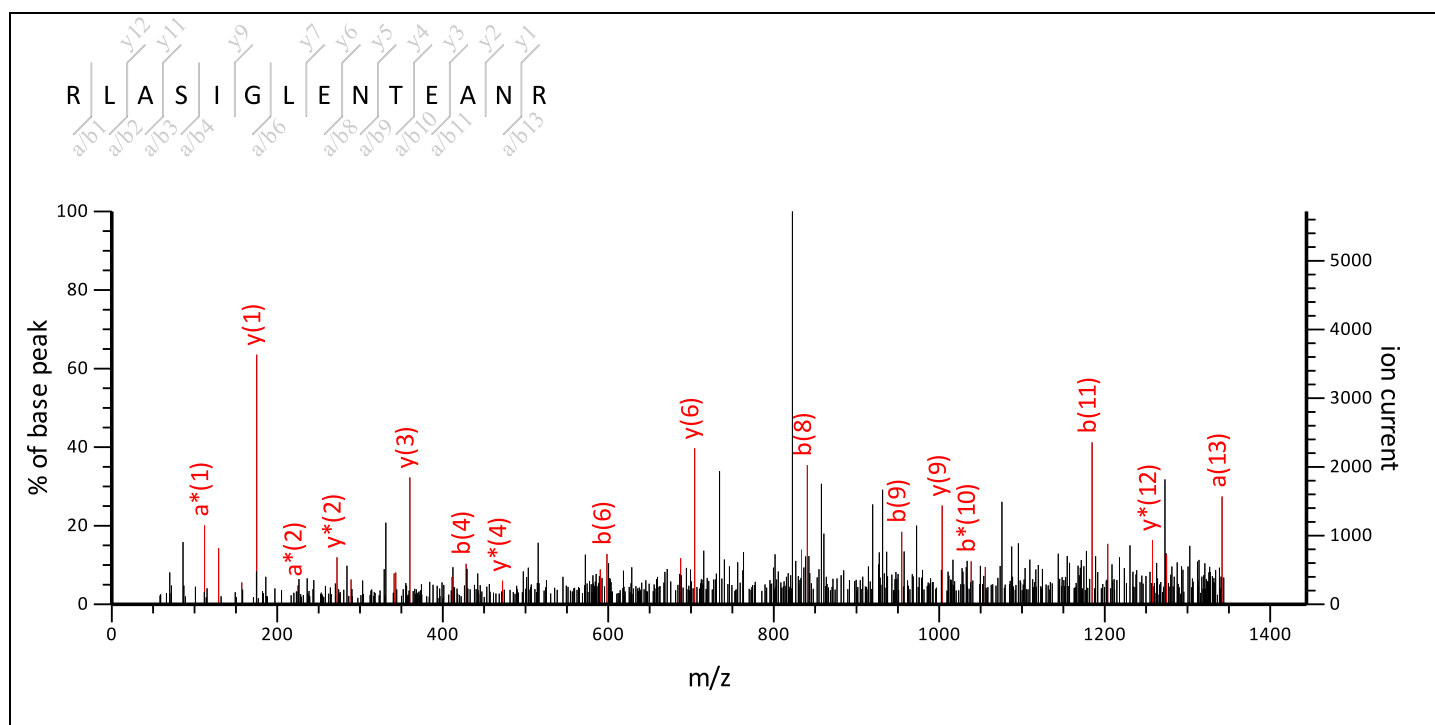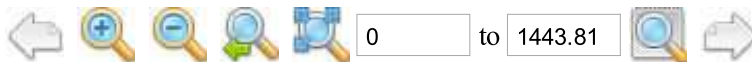

Label all possible matches  Label matches used for scoring

**Monoisotopic mass of neutral peptide Mr(calc):** 1542.8114

**Fixed modifications:** Carbamidomethyl (C) (apply to specified residues or termini only)

**Ions Score:** 38 **Expect:** 0.22

**Matches:** 28/78 fragment ions using 91 most intense peaks ([help](#))

| # | a               | a*              | b               | b*              | Seq.     | y                | y*               | #         |
|---|-----------------|-----------------|-----------------|-----------------|----------|------------------|------------------|-----------|
| 1 | <b>129.1135</b> | 112.0869        | <b>157.1084</b> | 140.0818        | <b>R</b> |                  |                  | <b>14</b> |
| 2 | 242.1975        | <b>225.1710</b> | 270.1925        | 253.1659        | <b>L</b> | 1387.7176        | 1370.6910        | <b>13</b> |
| 3 | 313.2347        | 296.2081        | <b>341.2296</b> | 324.2030        | <b>A</b> | <b>1274.6335</b> | <b>1257.6070</b> | <b>12</b> |
| 4 | 400.2667        | 383.2401        | <b>428.2616</b> | <b>411.2350</b> | <b>S</b> | <b>1203.5964</b> | 1186.5699        | <b>11</b> |
| 5 | 513.3507        | 496.3242        | 541.3457        | 524.3191        | <b>I</b> | 1116.5644        | 1099.5378        | <b>10</b> |
| 6 | 570.3722        | 553.3457        | <b>598.3671</b> | 581.3406        | <b>G</b> | <b>1003.4803</b> | 986.4538         | <b>9</b>  |
| 7 | 683.4563        | 666.4297        | 711.4512        | 694.4246        | <b>L</b> | 946.4588         | 929.4323         | <b>8</b>  |



|    |                  |           |                  |                  |   |                 |                 |   |
|----|------------------|-----------|------------------|------------------|---|-----------------|-----------------|---|
| 8  | 812.4989         | 795.4723  | <b>840.4938</b>  | 823.4672         | E | <b>833.3748</b> | 816.3482        | 7 |
| 9  | 926.5418         | 909.5152  | <b>954.5367</b>  | 937.5102         | N | <b>704.3322</b> | <b>687.3056</b> | 6 |
| 10 | 1027.5895        | 1010.5629 | <b>1055.5844</b> | <b>1038.5578</b> | T | <b>590.2893</b> | 573.2627        | 5 |
| 11 | 1156.6321        | 1139.6055 | <b>1184.6270</b> | 1167.6004        | E | 489.2416        | <b>472.2150</b> | 4 |
| 12 | 1227.6692        | 1210.6426 | 1255.6641        | 1238.6375        | A | <b>360.1990</b> | <b>343.1724</b> | 3 |
| 13 | <b>1341.7121</b> | 1324.6856 | 1369.7070        | 1352.6805        | N | <b>289.1619</b> | <b>272.1353</b> | 2 |
| 14 |                  |           |                  |                  | R | <b>175.1190</b> | 158.0924        | 1 |

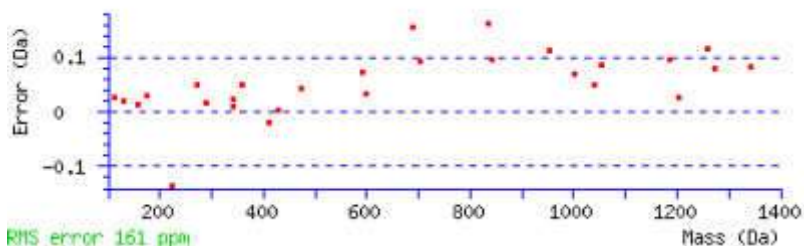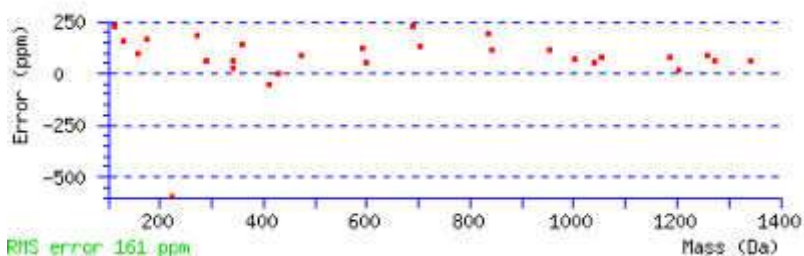

NCBI **BLAST** search of [RLASIGLENTEANR](#)

(Parameters: blastp, nr protein database, expect=20000, no filter, PAM30)

Other BLAST [web gateways](#)

#### All matches to this query

| Score | Mr(calc)  | Delta  | Sequence                         |
|-------|-----------|--------|----------------------------------|
| 38.5  | 1542.8114 | 0.0649 | <a href="#">RLASIGLENTEANR</a>   |
| 15.0  | 1542.7539 | 0.1223 | <a href="#">RDGSEAAWVATQPR</a>   |
| 14.5  | 1542.7247 | 0.1515 | <a href="#">AGARGGADDSNGSRPR</a> |
| 11.5  | 1542.8114 | 0.0648 | <a href="#">ANSSLVLTIDNRPR</a>   |
| 10.6  | 1542.8226 | 0.0536 | <a href="#">DRLSAAVTASSGRPR</a>  |
| 9.2   | 1542.8478 | 0.0284 | <a href="#">ASLATAGVTDAALARR</a> |
| 8.8   | 1542.8114 | 0.0648 | <a href="#">LASIGVENVESNRR</a>   |
| 8.8   | 1542.7725 | 0.1037 | <a href="#">RWLLGCVPGENR</a>     |
| 8.2   | 1542.8300 | 0.0462 | <a href="#">VLSMSRLGGAGSVGPR</a> |
| 7.4   | 1542.7685 | 0.1077 | <a href="#">RLDGGGGGSMDLRPR</a>  |

Mascot: <http://www.matrixscience.com/>



# Mascot Search Results

## Peptide View Spot no 128

MS/MS Fragmentation of **GILAMDESNATCGKR**

Found in **gi|108864048** in **NCBI nr**, Fructose-bisphosphate aldolase, chloroplast precursor, putative, expressed [Oryza sativa Japonica Group]

Match to Query 118: 1621.832324 from(1622.839600,1+) intensity(0.0000) index(26)

Title: Label: K15, Spot\_Id: 219908, Peak\_List\_Id: 228499, MSMS Job\_Run\_Id: 21992, Comment:

Data file C:\Documents and Settings\Administrator\Desktop\Farah-Garima 11May 2013\ppw\_K15\_136868296900.txt

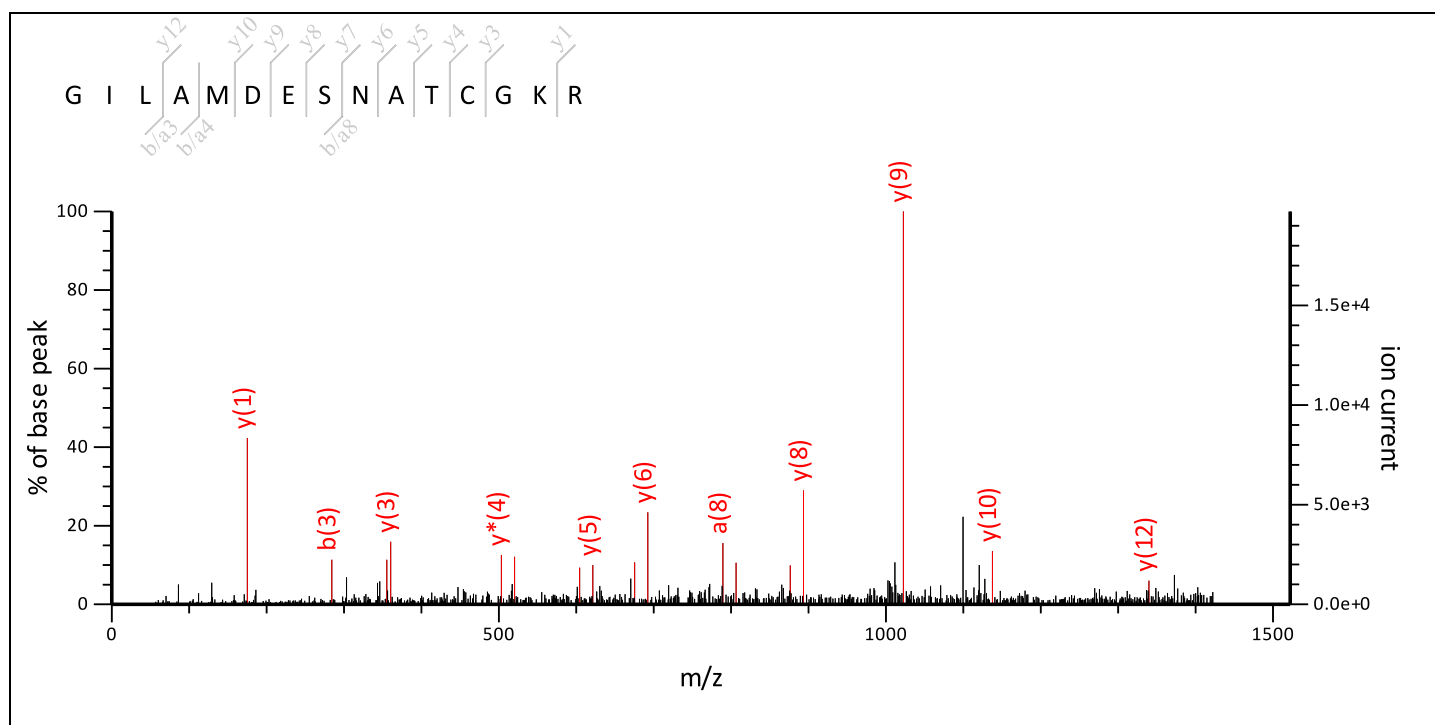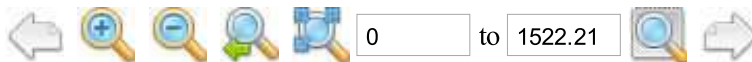

Label all possible matches  Label matches used for scoring

**Monoisotopic mass of neutral peptide Mr(calc):** 1621.7552

**Fixed modifications:** Carbamidomethyl (C) (apply to specified residues or termini only)

**Ions Score:** 73 **Expect:** 9.8e-05

**Matches :** 18/68 fragment ions using 28 most intense peaks ([help](#))

| # | a        | a* | b               | b* | Seq.     | y                | y*        | #         |
|---|----------|----|-----------------|----|----------|------------------|-----------|-----------|
| 1 | 30.0338  |    | 58.0287         |    | <b>G</b> |                  |           | <b>15</b> |
| 2 | 143.1179 |    | 171.1128        |    | <b>I</b> | 1565.7410        | 1548.7145 | <b>14</b> |
| 3 | 256.2020 |    | <b>284.1969</b> |    | <b>L</b> | 1452.6570        | 1435.6304 | <b>13</b> |
| 4 | 327.2391 |    | <b>355.2340</b> |    | <b>A</b> | <b>1339.5729</b> | 1322.5464 | <b>12</b> |
| 5 | 458.2796 |    | 486.2745        |    | <b>M</b> | 1268.5358        | 1251.5092 | <b>11</b> |
| 6 | 573.3065 |    | 601.3014        |    | <b>D</b> | <b>1137.4953</b> | 1120.4688 | <b>10</b> |
| 7 | 702.3491 |    | 730.3440        |    | <b>E</b> | <b>1022.4684</b> | 1005.4418 | <b>9</b>  |

|    |           |           |           |           |   |          |          |   |
|----|-----------|-----------|-----------|-----------|---|----------|----------|---|
| 8  | 789.3811  |           | 817.3760  |           | S | 893.4258 | 876.3992 | 8 |
| 9  | 903.4240  | 886.3975  | 931.4190  | 914.3924  | N | 806.3937 | 789.3672 | 7 |
| 10 | 974.4612  | 957.4346  | 1002.4561 | 985.4295  | A | 692.3508 | 675.3243 | 6 |
| 11 | 1075.5088 | 1058.4823 | 1103.5038 | 1086.4772 | T | 621.3137 | 604.2872 | 5 |
| 12 | 1235.5395 | 1218.5129 | 1263.5344 | 1246.5079 | C | 520.2660 | 503.2395 | 4 |
| 13 | 1292.5609 | 1275.5344 | 1320.5559 | 1303.5293 | G | 360.2354 | 343.2088 | 3 |
| 14 | 1420.6559 | 1403.6294 | 1448.6508 | 1431.6243 | K | 303.2139 | 286.1874 | 2 |
| 15 |           |           |           |           | R | 175.1190 | 158.0924 | 1 |

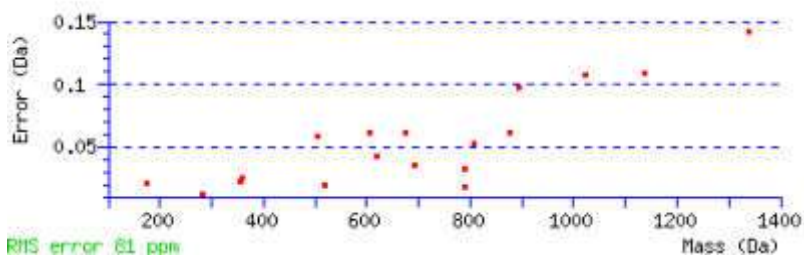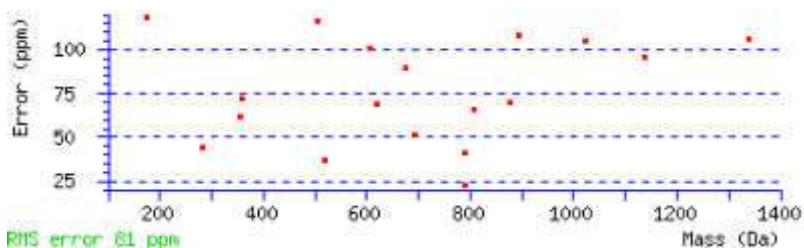

NCBI BLAST search of [GILAMDESNATCGKR](#)

(Parameters: blastp, nr protein database, expect=20000, no filter, PAM30)

Other BLAST [web gateways](#)

#### All matches to this query

| Score | Mr(calc)  | Delta   | Sequence                            |
|-------|-----------|---------|-------------------------------------|
| 72.6  | 1621.7552 | 0.0771  | <a href="#">GILAMDESNATCGKR</a>     |
| 15.2  | 1621.8246 | 0.0077  | <a href="#">GEMLPQSQSVVHIR</a>      |
| 11.1  | 1621.7292 | 0.1031  | <a href="#">SGDGASASSNSAAGASAVR</a> |
| 10.1  | 1621.7849 | 0.0475  | <a href="#">TRPFVEAFAADQDR</a>      |
| 8.6   | 1621.7267 | 0.1056  | <a href="#">GAGERDFTPAQGNMR</a>     |
| 7.8   | 1621.8345 | -0.0022 | <a href="#">SISIESISLDMSKGR</a>     |
| 6.8   | 1621.8763 | -0.0439 | <a href="#">LFLIQQGMAFNGKR</a>      |
| 6.8   | 1621.8246 | 0.0077  | <a href="#">HLPLGPKDMLGSAR</a>      |
| 6.7   | 1621.6800 | 0.1524  | <a href="#">RDVCVYMYCGGAR</a>       |
| 6.4   | 1621.7696 | 0.0627  | <a href="#">GSTGSAASTNPAADLER</a>   |

Mascot: <http://www.matrixscience.com/>



# Mascot Search Results

## Peptide View Spot no 128

MS/MS Fragmentation of **YTS DGEAAEAK EGMFVK**

Found in **gi|108864048** in **NCBI nr**, Fructose-bisphosphate aldolase, chloroplast precursor, putative, expressed [Oryza sativa Japonica Group]

Match to Query 124: 1831.899124 from(1832.906400,1+) intensity(0.0000) index(27)

Title: Label: K15, Spot\_Id: 219908, Peak\_List\_Id: 228529, MSMS Job\_Run\_Id: 21992, Comment:

Data file C:\Documents and Settings\Administrator\Desktop\Farah-Garima 11May 2013\ppw\_K15\_136868296900.txt

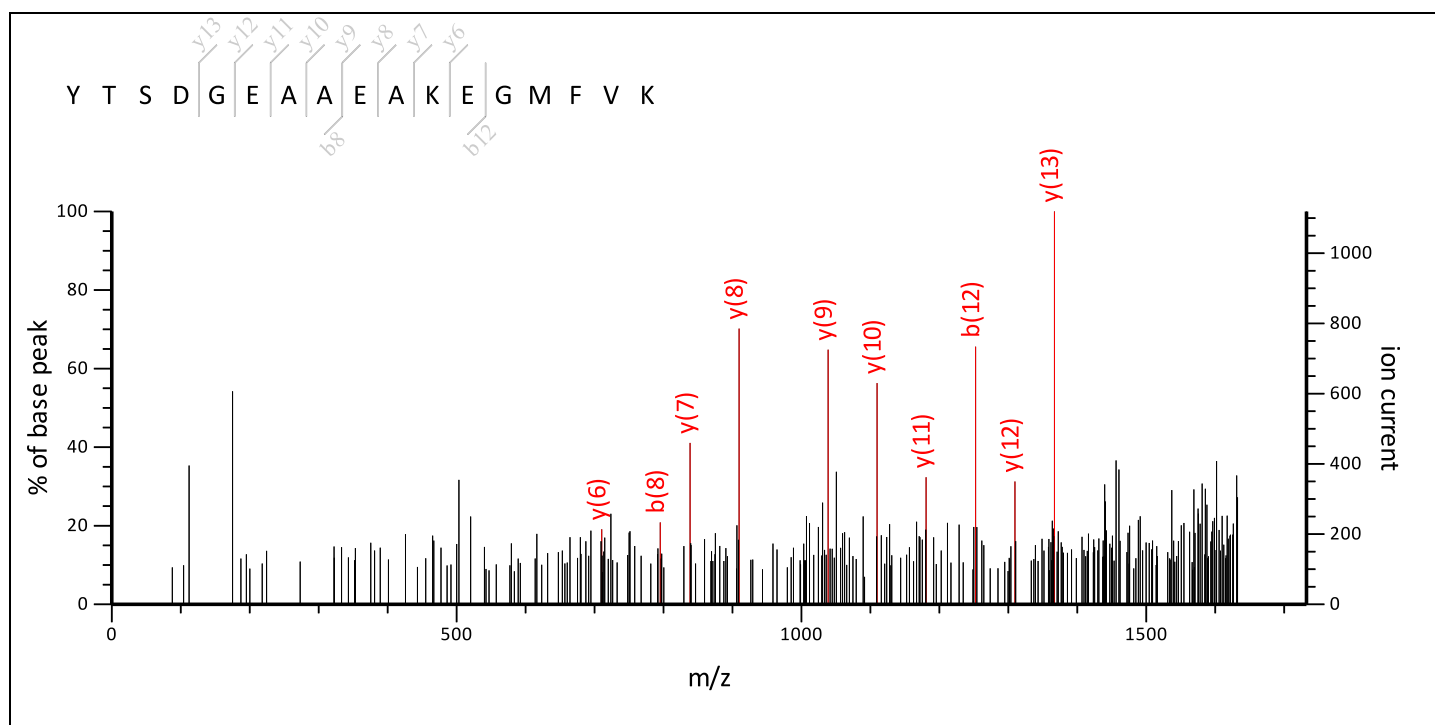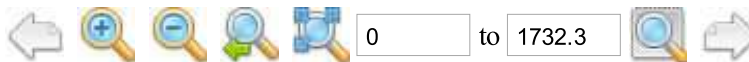

Label all possible matches  Label matches used for scoring

**Monoisotopic mass of neutral peptide Mr(calc):** 1831.8298

**Fixed modifications:** Carbamidomethyl (C) (apply to specified residues or termini only)

**Ions Score:** 26 **Expect:** 4.1

**Matches :** 11/76 fragment ions using 32 most intense peaks ([help](#))

| # | a        | a* | b        | b* | Seq. | y         | y*        | #  |
|---|----------|----|----------|----|------|-----------|-----------|----|
| 1 | 136.0757 |    | 164.0706 |    | Y    |           |           | 17 |
| 2 | 237.1234 |    | 265.1183 |    | T    | 1669.7738 | 1652.7472 | 16 |
| 3 | 324.1554 |    | 352.1503 |    | S    | 1568.7261 | 1551.6996 | 15 |
| 4 | 439.1823 |    | 467.1773 |    | D    | 1481.6941 | 1464.6675 | 14 |
| 5 | 496.2038 |    | 524.1987 |    | G    | 1366.6671 | 1349.6406 | 13 |
| 6 | 625.2464 |    | 653.2413 |    | E    | 1309.6457 | 1292.6191 | 12 |
| 7 | 696.2835 |    | 724.2784 |    | A    | 1180.6031 | 1163.5765 | 11 |

|    |           |           |                  |           |   |                  |           |    |
|----|-----------|-----------|------------------|-----------|---|------------------|-----------|----|
| 8  | 767.3206  |           | <b>795.3155</b>  |           | A | <b>1109.5660</b> | 1092.5394 | 10 |
| 9  | 896.3632  |           | 924.3581         |           | E | <b>1038.5288</b> | 1021.5023 | 9  |
| 10 | 967.4003  |           | 995.3952         |           | A | <b>909.4863</b>  | 892.4597  | 8  |
| 11 | 1095.4953 | 1078.4687 | 1123.4902        | 1106.4637 | K | <b>838.4491</b>  | 821.4226  | 7  |
| 12 | 1224.5379 | 1207.5113 | <b>1252.5328</b> | 1235.5063 | E | <b>710.3542</b>  | 693.3276  | 6  |
| 13 | 1281.5594 | 1264.5328 | <b>1309.5543</b> | 1292.5277 | G | 581.3116         | 564.2850  | 5  |
| 14 | 1412.5998 | 1395.5733 | 1440.5948        | 1423.5682 | M | 524.2901         | 507.2636  | 4  |
| 15 | 1559.6683 | 1542.6417 | 1587.6632        | 1570.6366 | F | 393.2496         | 376.2231  | 3  |
| 16 | 1658.7367 | 1641.7101 | 1686.7316        | 1669.7050 | V | 246.1812         | 229.1547  | 2  |
| 17 |           |           |                  |           | K | 147.1128         | 130.0863  | 1  |

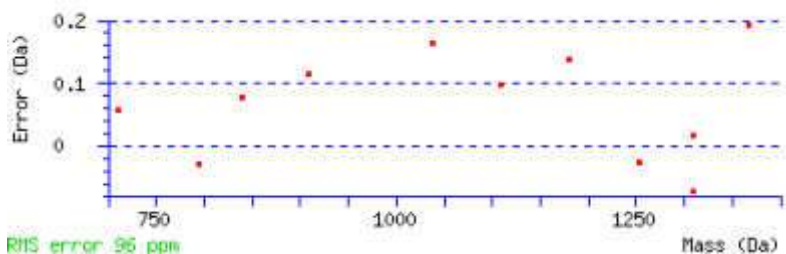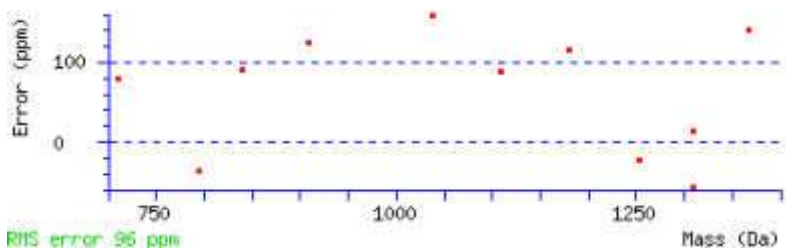

NCBI BLAST search of [YTSDGEAAEAKEGMFVK](#)

(Parameters: blastp, nr protein database, expect=20000, no filter, PAM30)

Other BLAST [web gateways](#)

#### All matches to this query

| Score | Mr(calc)  | Delta   | Sequence                            |
|-------|-----------|---------|-------------------------------------|
| 26.1  | 1831.8298 | 0.0693  | <a href="#">YTSDGEAAEAKEGMFVK</a>   |
| 8.9   | 1831.8748 | 0.0244  | <a href="#">ACGHQVAHGDLALADAAR</a>  |
| 5.4   | 1831.8201 | 0.0790  | <a href="#">MDMGPCPKMHSLQLR</a>     |
| 2.3   | 1831.9540 | -0.0549 | <a href="#">AAVKPNSVVAKDGSIGNYR</a> |
| 0.9   | 1831.7643 | 0.1349  | <a href="#">DDGDAQEEVMTNLHSR</a>    |
| 0.4   | 1831.9462 | -0.0471 | <a href="#">TSTIKNTGOLLEQMPR</a>    |
| 0.3   | 1831.9904 | -0.0913 | <a href="#">AGGIAPEQALHIGDSLRLK</a> |
| 0.2   | 1831.9866 | -0.0874 | <a href="#">TQIYGPAEMIQILAIR</a>    |

Mascot: <http://www.matrixscience.com/>



# Mascot Search Results

## Peptide View Spot no 128

MS/MS Fragmentation of **Y T S D G E A A E A K E G M F V K**

Found in **gi|108864048** in **NCBI nr**, Fructose-bisphosphate aldolase, chloroplast precursor, putative, expressed [Oryza sativa Japonica Group]

Match to Query 126: 1847.893824 from(1848.901100,1+) intensity(0.0000) index(28)

Title: Label: K15, Spot\_Id: 219908, Peak\_List\_Id: 228512, MSMS Job\_Run\_Id: 21992, Comment:

Data file C:\Documents and Settings\Administrator\Desktop\Farah-Garima 11May 2013\ppw\_K15\_136868296900.txt

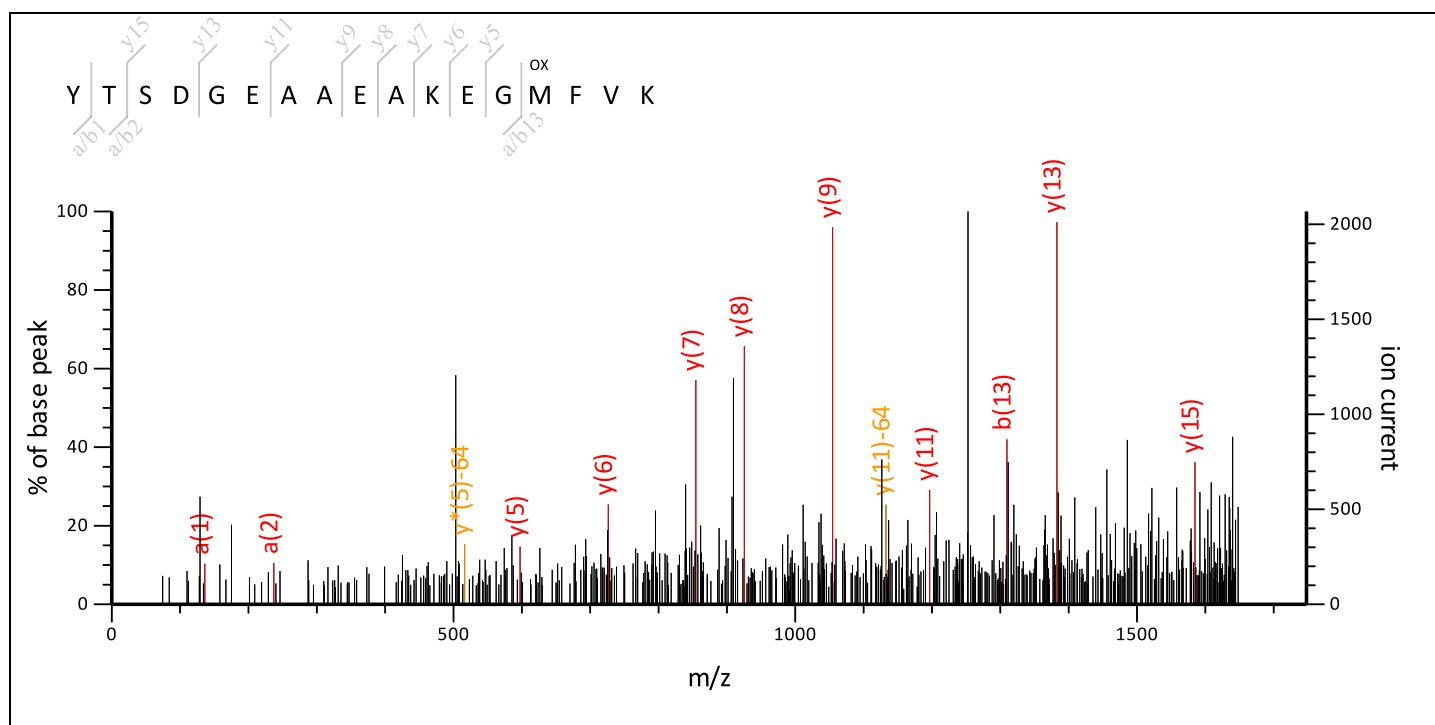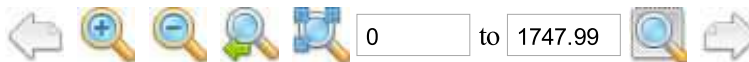

Label all possible matches  Label matches used for scoring

**Monoisotopic mass of neutral peptide Mr(calc):** 1847.8247

**Fixed modifications:** Carbamidomethyl (C) (apply to specified residues or termini only)

**Variable modifications:**

**M14** : Oxidation (M), with neutral losses 0.0000 (shown in table), 63.9983

**Ions Score:** 28 **Expect:** 2.6

**Matches** : 13/114 fragment ions using 32 most intense peaks ([help](#))

| # | a        | a* | b        | b* | Seq. | y         | y*        | #  |
|---|----------|----|----------|----|------|-----------|-----------|----|
| 1 | 136.0757 |    | 164.0706 |    | Y    |           |           | 17 |
| 2 | 237.1234 |    | 265.1183 |    | T    | 1685.7687 | 1668.7421 | 16 |
| 3 | 324.1554 |    | 352.1503 |    | S    | 1584.7210 | 1567.6945 | 15 |
| 4 | 439.1823 |    | 467.1773 |    | D    | 1497.6890 | 1480.6624 | 14 |
| 5 | 496.2038 |    | 524.1987 |    | G    | 1382.6620 | 1365.6355 | 13 |
| 6 | 625.2464 |    | 653.2413 |    | E    | 1325.6406 | 1308.6140 | 12 |

|    |           |           |                  |           |   |                  |           |           |
|----|-----------|-----------|------------------|-----------|---|------------------|-----------|-----------|
| 7  | 696.2835  |           | 724.2784         |           | A | <b>1196.5980</b> | 1179.5714 | <b>11</b> |
| 8  | 767.3206  |           | 795.3155         |           | A | 1125.5609        | 1108.5343 | <b>10</b> |
| 9  | 896.3632  |           | 924.3581         |           | E | <b>1054.5238</b> | 1037.4972 | <b>9</b>  |
| 10 | 967.4003  |           | 995.3952         |           | A | <b>925.4812</b>  | 908.4546  | <b>8</b>  |
| 11 | 1095.4953 | 1078.4687 | 1123.4902        | 1106.4637 | K | <b>854.4441</b>  | 837.4175  | <b>7</b>  |
| 12 | 1224.5379 | 1207.5113 | 1252.5328        | 1235.5063 | E | <b>726.3491</b>  | 709.3225  | <b>6</b>  |
| 13 | 1281.5594 | 1264.5328 | <b>1309.5543</b> | 1292.5277 | G | <b>597.3065</b>  | 580.2799  | <b>5</b>  |
| 14 | 1428.5948 | 1411.5682 | 1456.5897        | 1439.5631 | M | 540.2850         | 523.2585  | <b>4</b>  |
| 15 | 1575.6632 | 1558.6366 | 1603.6581        | 1586.6315 | F | 393.2496         | 376.2231  | <b>3</b>  |
| 16 | 1674.7316 | 1657.7050 | 1702.7265        | 1685.6999 | V | 246.1812         | 229.1547  | <b>2</b>  |
| 17 |           |           |                  |           | K | 147.1128         | 130.0863  | <b>1</b>  |

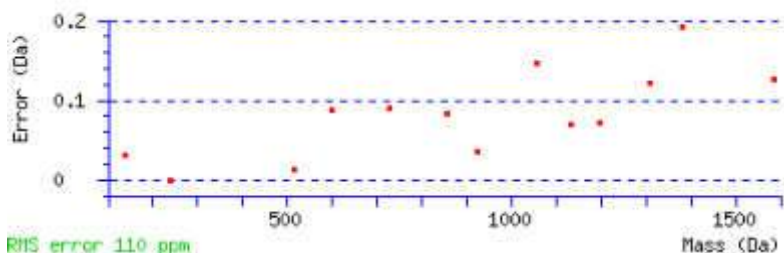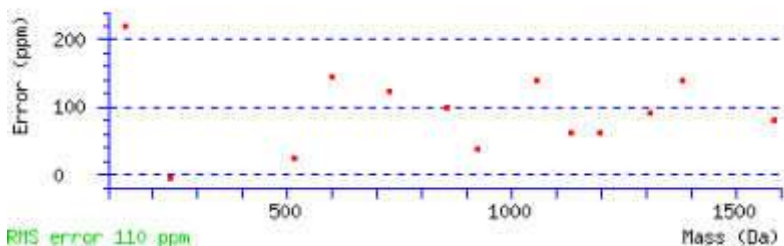

NCBI **BLAST** search of [YTSDGEAAEAKEGMFVK](#)

(Parameters: blastp, nr protein database, expect=20000, no filter, PAM30)

Other BLAST [web gateways](#)

#### All matches to this query

| Score | Mr(calc)  | Delta   | Sequence                            |
|-------|-----------|---------|-------------------------------------|
| 28.1  | 1847.8247 | 0.0691  | <a href="#">YTSDGEAAEAKEGMFVK</a>   |
| 10.0  | 1847.8148 | 0.0790  | <a href="#">LSYGDQMTQVWDYSR</a>     |
| 6.1   | 1847.9278 | -0.0340 | <a href="#">RHOALLYAESQNYQK</a>     |
| 3.4   | 1847.7883 | 0.1055  | <a href="#">YTSDGEAAEASENMFVK</a>   |
| 2.4   | 1847.8795 | 0.0143  | <a href="#">QSGKPVEKNMQTNSER</a>    |
| 1.9   | 1847.8618 | 0.0320  | <a href="#">MAVATADGGQVTNGCKPR</a>  |
| 1.6   | 1847.8988 | -0.0050 | <a href="#">RFTHALQVSEWMTDK</a>     |
| 1.5   | 1847.8207 | 0.0731  | <a href="#">GDSHDTIQVEMVSTDAK</a>   |
| 1.2   | 1847.9741 | -0.0803 | <a href="#">TLVDLAVDPASSHPVTAR</a>  |
| 0.8   | 1847.9853 | -0.0915 | <a href="#">NAASPSPVALSAAVSTHLR</a> |

Mascot: <http://www.matrixscience.com/>





# Mascot Search Results

## Peptide View Spot no 128

MS/MS Fragmentation of **GLVPLAGSNNESWCQGLDGLASR**

Found in **gi|108864048** in **NCBIInr**, Fructose-bisphosphate aldolase, chloroplast precursor, putative, expressed [Oryza sativa Japonica Group]

Match to Query 136: 2400.242224 from(2401.249500,1+) intensity(0.0000) index(31)

Title: Label: K15, Spot\_Id: 219908, Peak\_List\_Id: 228498, MSMS Job\_Run\_Id: 21992, Comment:

Data file C:\Documents and Settings\Administrator\Desktop\Farah-Garima 11May 2013\ppw\_K15\_136868296900.txt

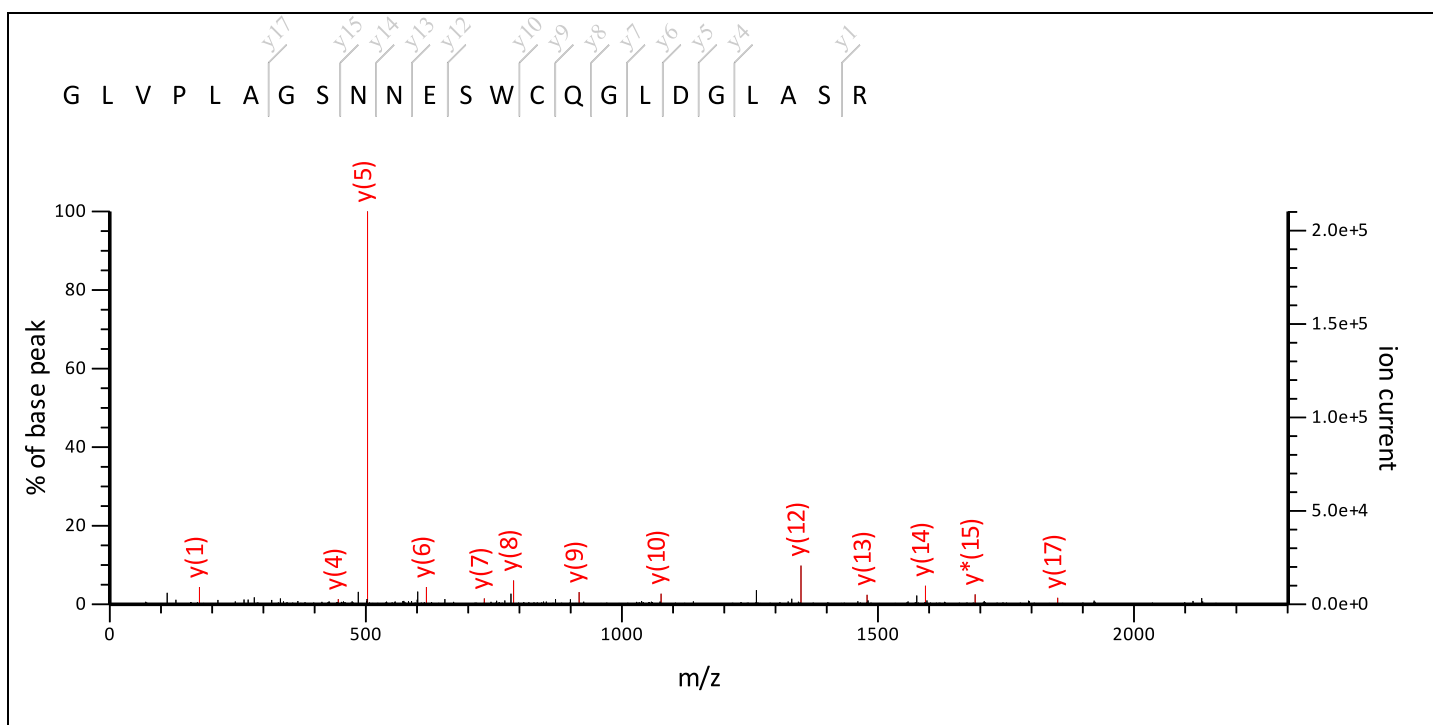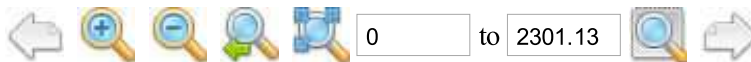

Label all possible matches  Label matches used for scoring

**Monoisotopic mass of neutral peptide Mr(calc):** 2400.1492

**Fixed modifications:** Carbamidomethyl (C) (apply to specified residues or termini only)

**Ions Score:** 85 **Expect:** 3.9e-06

**Matches:** 13/116 fragment ions using 22 most intense peaks ([help](#))

| # | a        | a* | b        | b* | Seq.     | y                | y*        | #         |
|---|----------|----|----------|----|----------|------------------|-----------|-----------|
| 1 | 30.0338  |    | 58.0287  |    | <b>G</b> |                  |           | <b>23</b> |
| 2 | 143.1179 |    | 171.1128 |    | <b>L</b> | 2344.1350        | 2327.1085 | <b>22</b> |
| 3 | 242.1863 |    | 270.1812 |    | <b>V</b> | 2231.0510        | 2214.0244 | <b>21</b> |
| 4 | 339.2391 |    | 367.2340 |    | <b>P</b> | 2131.9825        | 2114.9560 | <b>20</b> |
| 5 | 452.3231 |    | 480.3180 |    | <b>L</b> | 2034.9298        | 2017.9032 | <b>19</b> |
| 6 | 523.3602 |    | 551.3552 |    | <b>A</b> | 1921.8457        | 1904.8192 | <b>18</b> |
| 7 | 580.3817 |    | 608.3766 |    | <b>G</b> | <b>1850.8086</b> | 1833.7821 | <b>17</b> |

|    |           |           |           |           |   |           |           |    |
|----|-----------|-----------|-----------|-----------|---|-----------|-----------|----|
| 8  | 667.4137  |           | 695.4087  |           | S | 1793.7871 | 1776.7606 | 16 |
| 9  | 781.4567  | 764.4301  | 809.4516  | 792.4250  | N | 1706.7551 | 1689.7286 | 15 |
| 10 | 895.4996  | 878.4730  | 923.4945  | 906.4680  | N | 1592.7122 | 1575.6856 | 14 |
| 11 | 1024.5422 | 1007.5156 | 1052.5371 | 1035.5105 | E | 1478.6693 | 1461.6427 | 13 |
| 12 | 1111.5742 | 1094.5477 | 1139.5691 | 1122.5426 | S | 1349.6267 | 1332.6001 | 12 |
| 13 | 1297.6535 | 1280.6270 | 1325.6484 | 1308.6219 | W | 1262.5946 | 1245.5681 | 11 |
| 14 | 1457.6842 | 1440.6576 | 1485.6791 | 1468.6525 | C | 1076.5153 | 1059.4888 | 10 |
| 15 | 1585.7428 | 1568.7162 | 1613.7377 | 1596.7111 | Q | 916.4847  | 899.4581  | 9  |
| 16 | 1642.7642 | 1625.7377 | 1670.7591 | 1653.7326 | G | 788.4261  | 771.3995  | 8  |
| 17 | 1755.8483 | 1738.8217 | 1783.8432 | 1766.8166 | L | 731.4046  | 714.3781  | 7  |
| 18 | 1870.8752 | 1853.8487 | 1898.8701 | 1881.8436 | D | 618.3206  | 601.2940  | 6  |
| 19 | 1927.8967 | 1910.8701 | 1955.8916 | 1938.8651 | G | 503.2936  | 486.2671  | 5  |
| 20 | 2040.9808 | 2023.9542 | 2068.9757 | 2051.9491 | L | 446.2722  | 429.2456  | 4  |
| 21 | 2112.0179 | 2094.9913 | 2140.0128 | 2122.9862 | A | 333.1881  | 316.1615  | 3  |
| 22 | 2199.0499 | 2182.0233 | 2227.0448 | 2210.0183 | S | 262.1510  | 245.1244  | 2  |
| 23 |           |           |           |           | R | 175.1190  | 158.0924  | 1  |

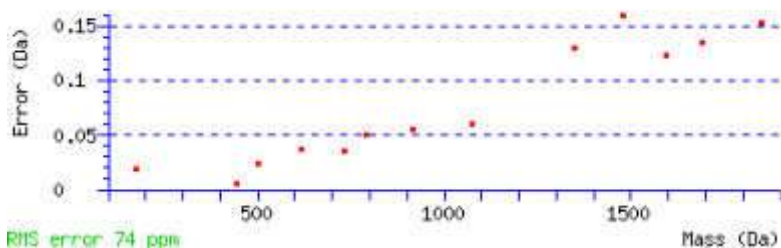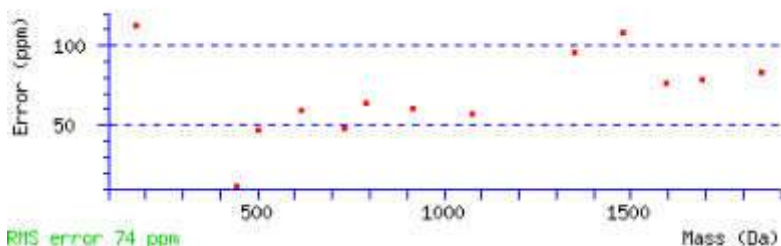

NCBI **BLAST** search of [GLVPLAGSNNESWCQGLDGLASR](#)

(Parameters: blastp, nr protein database, expect=20000, no filter, PAM30)

Other BLAST [web gateways](#)

#### All matches to this query

| Score | Mr(calc)  | Delta  | Sequence                                  |
|-------|-----------|--------|-------------------------------------------|
| 84.7  | 2400.1492 | 0.0930 | <a href="#">GLVPLAGSNNESWCQGLDGLASR</a>   |
| 8.7   | 2400.1267 | 0.1155 | <a href="#">GSYADELVTFEVACAGLDVAASR</a>   |
| 8.7   | 2400.1193 | 0.1229 | <a href="#">WASSAPATAVAEAEAEALGDGDGVR</a> |
| 8.5   | 2400.0573 | 0.1849 | <a href="#">AAADDCPAMVPDLDLDLGGAAR</a>    |
| 6.2   | 2400.1487 | 0.0935 | <a href="#">STLNSTMTMKTLCCLINNEWK</a>     |
| 5.9   | 2400.1591 | 0.0831 | <a href="#">SSASVAQTMGTVSYVGALVGEQSR</a>  |
| 5.1   | 2400.0872 | 0.1551 | <a href="#">LNGEMCLMDREFSAEVGALS</a>      |

|     |           |        |                                             |
|-----|-----------|--------|---------------------------------------------|
| 5.1 | 2400.0872 | 0.1551 | <a href="#">LNGEMCLMDREFSAEVGALSR</a>       |
| 5.0 | 2400.0625 | 0.1797 | <a href="#">MGSEGRAWNGAAGSSGHGGGGGGVEAK</a> |
| 4.9 | 2400.0565 | 0.1858 | <a href="#">ATDDAGDEEEAATTFGSTTATALR</a>    |

**Mascot:** <http://www.matrixscience.com/>



# Mascot Search Results

## Peptide View Spot no 128

MS/MS Fragmentation of **VDKGLVPLAGSNNESWCQGLDGLASR**

Found in **gi|108864048** in **NCBI nr**, Fructose-bisphosphate aldolase, chloroplast precursor, putative, expressed [Oryza sativa Japonica Group]

Match to Query 141: 2742.443424 from(2743.450700,1+) intensity(0.0000) index(33)

Title: Label: K15, Spot\_Id: 219908, Peak\_List\_Id: 228518, MSMS Job\_Run\_Id: 21992, Comment:

Data file C:\Documents and Settings\Administrator\Desktop\Farah-Garima 11May 2013\ppw\_K15\_136868296900.txt

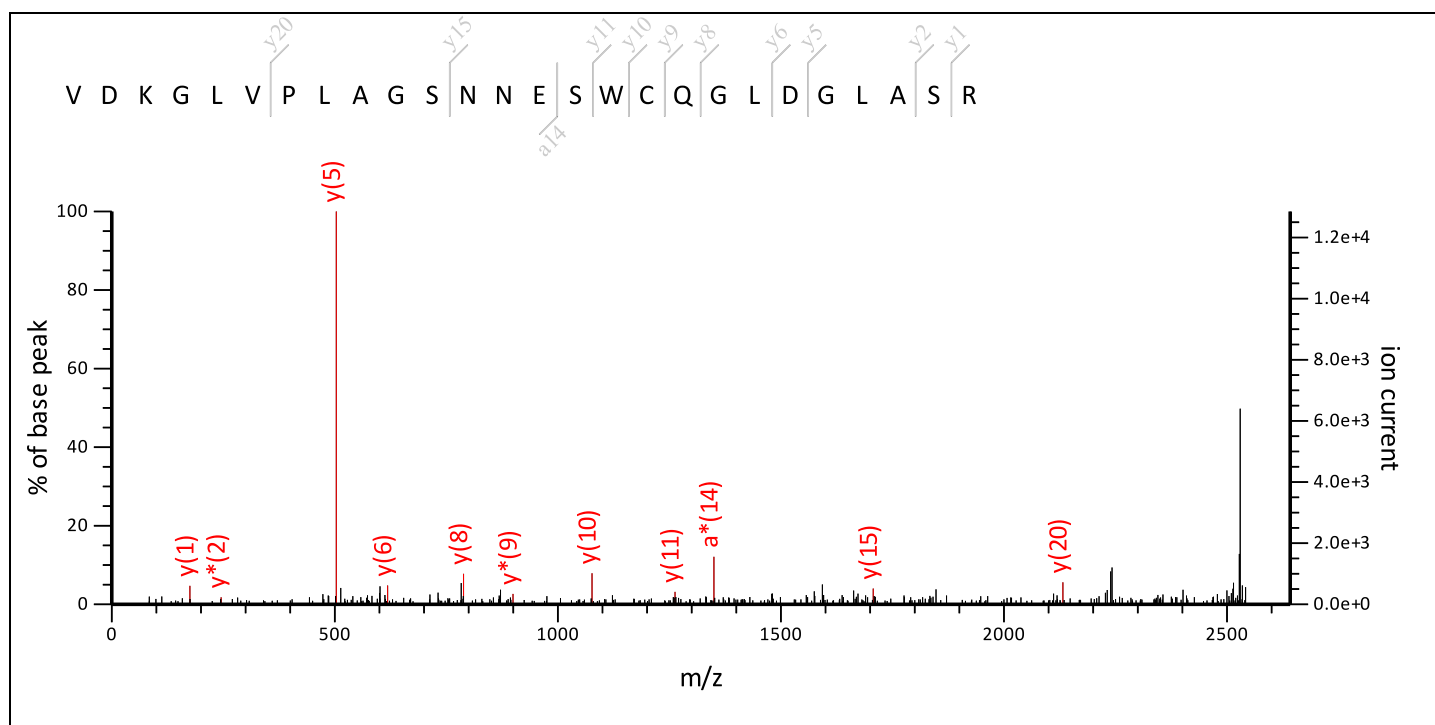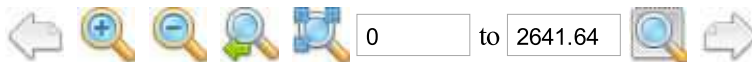

Label all possible matches  Label matches used for scoring

**Monoisotopic mass of neutral peptide Mr(calc):** 2742.3395

**Fixed modifications:** Carbamidomethyl (C) (apply to specified residues or termini only)

**Ions Score:** 39 **Expect:** 0.13

**Matches:** 12/146 fragment ions using 25 most intense peaks ([help](#))

| # | a        | a*       | b        | b*       | Seq. | y                | y*        | #  |
|---|----------|----------|----------|----------|------|------------------|-----------|----|
| 1 | 72.0808  |          | 100.0757 |          | V    |                  |           | 26 |
| 2 | 187.1077 |          | 215.1026 |          | D    | 2644.2784        | 2627.2518 | 25 |
| 3 | 315.2027 | 298.1761 | 343.1976 | 326.1710 | K    | 2529.2514        | 2512.2249 | 24 |
| 4 | 372.2241 | 355.1976 | 400.2191 | 383.1925 | G    | 2401.1565        | 2384.1299 | 23 |
| 5 | 485.3082 | 468.2817 | 513.3031 | 496.2766 | L    | 2344.1350        | 2327.1085 | 22 |
| 6 | 584.3766 | 567.3501 | 612.3715 | 595.3450 | V    | 2231.0510        | 2214.0244 | 21 |
| 7 | 681.4294 | 664.4028 | 709.4243 | 692.3978 | P    | <b>2131.9825</b> | 2114.9560 | 20 |

|    |           |                  |           |           |   |                  |                 |    |
|----|-----------|------------------|-----------|-----------|---|------------------|-----------------|----|
| 8  | 794.5135  | 777.4869         | 822.5084  | 805.4818  | L | 2034.9298        | 2017.9032       | 19 |
| 9  | 865.5506  | 848.5240         | 893.5455  | 876.5189  | A | 1921.8457        | 1904.8192       | 18 |
| 10 | 922.5720  | 905.5455         | 950.5669  | 933.5404  | G | 1850.8086        | 1833.7821       | 17 |
| 11 | 1009.6041 | 992.5775         | 1037.5990 | 1020.5724 | S | 1793.7871        | 1776.7606       | 16 |
| 12 | 1123.6470 | 1106.6204        | 1151.6419 | 1134.6154 | N | <b>1706.7551</b> | 1689.7286       | 15 |
| 13 | 1237.6899 | 1220.6634        | 1265.6848 | 1248.6583 | N | 1592.7122        | 1575.6856       | 14 |
| 14 | 1366.7325 | <b>1349.7060</b> | 1394.7274 | 1377.7009 | E | 1478.6693        | 1461.6427       | 13 |
| 15 | 1453.7645 | 1436.7380        | 1481.7594 | 1464.7329 | S | <b>1349.6267</b> | 1332.6001       | 12 |
| 16 | 1639.8438 | 1622.8173        | 1667.8388 | 1650.8122 | W | <b>1262.5946</b> | 1245.5681       | 11 |
| 17 | 1799.8745 | 1782.8479        | 1827.8694 | 1810.8429 | C | <b>1076.5153</b> | 1059.4888       | 10 |
| 18 | 1927.9331 | 1910.9065        | 1955.9280 | 1938.9014 | Q | 916.4847         | <b>899.4581</b> | 9  |
| 19 | 1984.9545 | 1967.9280        | 2012.9495 | 1995.9229 | G | <b>788.4261</b>  | 771.3995        | 8  |
| 20 | 2098.0386 | 2081.0121        | 2126.0335 | 2109.0070 | L | 731.4046         | 714.3781        | 7  |
| 21 | 2213.0655 | 2196.0390        | 2241.0605 | 2224.0339 | D | <b>618.3206</b>  | 601.2940        | 6  |
| 22 | 2270.0870 | 2253.0605        | 2298.0819 | 2281.0554 | G | <b>503.2936</b>  | 486.2671        | 5  |
| 23 | 2383.1711 | 2366.1445        | 2411.1660 | 2394.1394 | L | 446.2722         | 429.2456        | 4  |
| 24 | 2454.2082 | 2437.1816        | 2482.2031 | 2465.1766 | A | 333.1881         | 316.1615        | 3  |
| 25 | 2541.2402 | 2524.2137        | 2569.2351 | 2552.2086 | S | 262.1510         | <b>245.1244</b> | 2  |
| 26 |           |                  |           |           | R | <b>175.1190</b>  | 158.0924        | 1  |

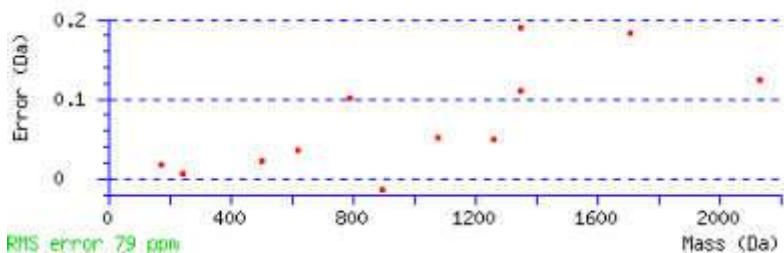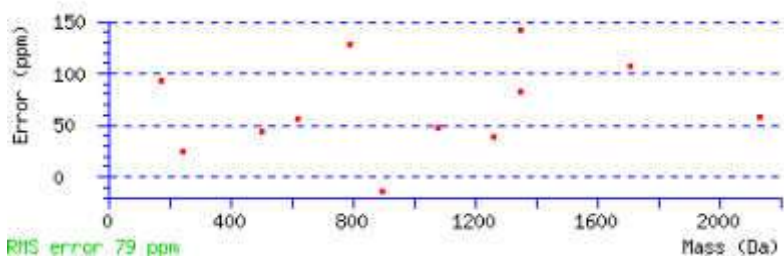

NCBI **BLAST** search of [VDKGLVPLAGSNNESWCQGLDGLASR](#)  
 (Parameters: blastp, nr protein database, expect=20000, no filter, PAM30)  
 Other BLAST [web gateways](#)

#### All matches to this query

| Score | Mr(calc)  | Delta  | Sequence                                   |
|-------|-----------|--------|--------------------------------------------|
| 38.9  | 2742.3395 | 0.1039 | <a href="#">VDKGLVPLAGSNNESWCQGLDGLASR</a> |
| 0.8   | 2742.3687 | 0.0747 | <a href="#">MLEERVLLPGGPGEVELDVADWYR</a>   |
| 0.7   | 2742.2840 | 0.1594 | <a href="#">TTSKLDQDAALSFLFEDMVQLGCR</a>   |
| 0.7   | 2742.2079 | 0.2355 | <a href="#">DVTDFDFSSNNQYIASSSMDKTVR</a>   |

|     |           |        |                                           |
|-----|-----------|--------|-------------------------------------------|
| 0.6 | 2742.3887 | 0.0547 | <a href="#">CLDILHIHKGFFIQQSVFGACPR</a>   |
| 0.6 | 2742.3523 | 0.0911 | <a href="#">CLDILHIHQGFFIQQSVFGACPR</a>   |
| 0.4 | 2742.2694 | 0.1740 | <a href="#">EELAAGEMTEDSLGAFFDIVDQSLR</a> |

**Mascot:** <http://www.matrixscience.com/>



# Mascot Search Results

## Peptide View Spot no 128

MS/MS Fragmentation of **YAAISQDNGLVPIVEPEILLDGEHGD R**

Found in **gi|108864048** in **NCBI**nr, Fructose-bisphosphate aldolase, chloroplast precursor, putative, expressed [Oryza sativa Japonica Group]

Match to Query 143: 3032.659724 from(3033.667000,1+) intensity(0.0000) index(34)

Title: Label: K15, Spot\_Id: 219908, Peak\_List\_Id: 228505, MSMS Job\_Run\_Id: 21992, Comment:

Data file C:\Documents and Settings\Administrator\Desktop\Farah-Garima 11May 2013\ppw\_K15\_136868296900.txt

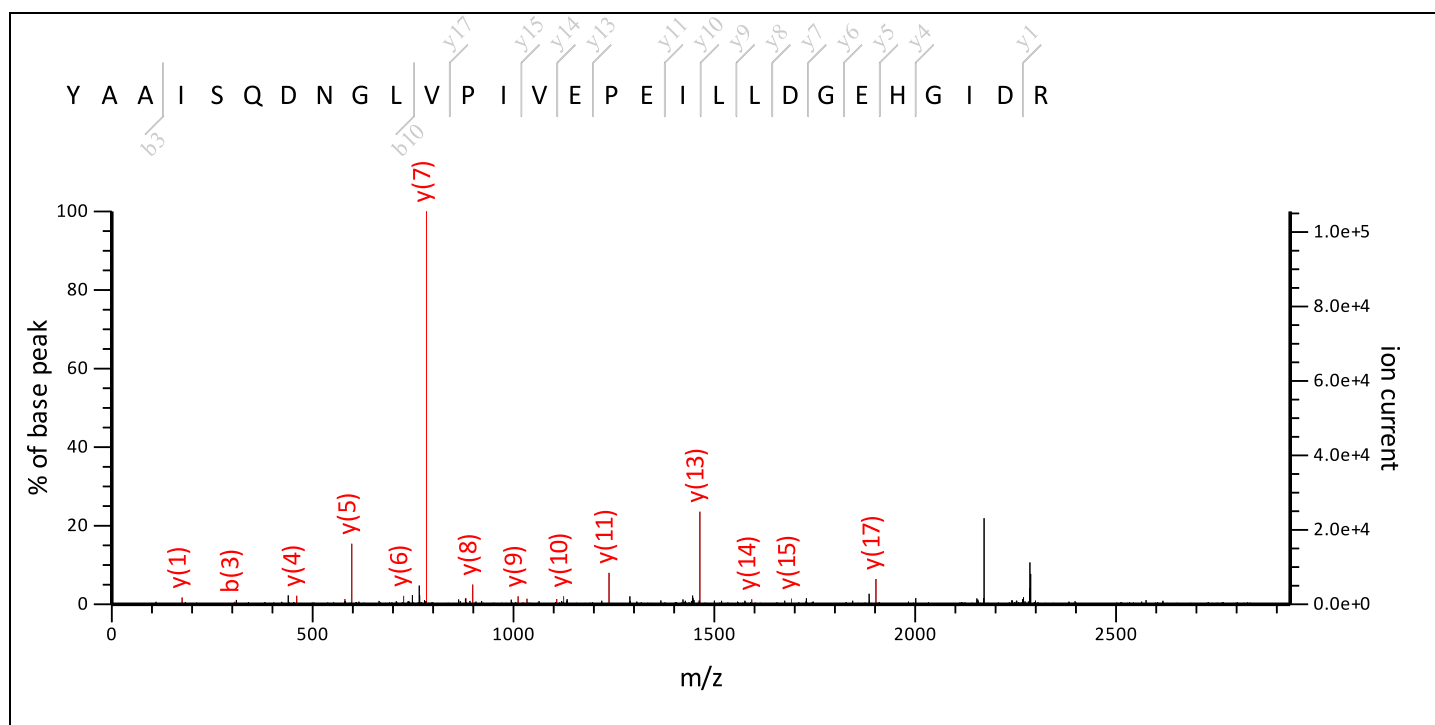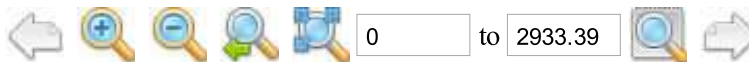

Label all possible matches  Label matches used for scoring

**Monoisotopic mass of neutral peptide Mr(calc):** 3032.5455

**Fixed modifications:** Carbamidomethyl (C) (apply to specified residues or termini only)

**Ions Score:** 47 **Expect:** 0.015

**Matches :** 18/152 fragment ions using 56 most intense peaks ([help](#))

| # | a        | a*       | b               | b*       | Seq. | y         | y*        | #  |
|---|----------|----------|-----------------|----------|------|-----------|-----------|----|
| 1 | 136.0757 |          | 164.0706        |          | Y    |           |           | 28 |
| 2 | 207.1128 |          | 235.1077        |          | A    | 2870.4894 | 2853.4629 | 27 |
| 3 | 278.1499 |          | <b>306.1448</b> |          | A    | 2799.4523 | 2782.4258 | 26 |
| 4 | 391.2340 |          | 419.2289        |          | I    | 2728.4152 | 2711.3887 | 25 |
| 5 | 478.2660 |          | 506.2609        |          | S    | 2615.3311 | 2598.3046 | 24 |
| 6 | 606.3246 | 589.2980 | 634.3195        | 617.2930 | Q    | 2528.2991 | 2511.2726 | 23 |
| 7 | 721.3515 | 704.3250 | 749.3464        | 732.3199 | D    | 2400.2405 | 2383.2140 | 22 |



|    |           |           |                  |           |   |                  |                  |    |
|----|-----------|-----------|------------------|-----------|---|------------------|------------------|----|
| 8  | 835.3945  | 818.3679  | 863.3894         | 846.3628  | N | 2285.2136        | 2268.1870        | 21 |
| 9  | 892.4159  | 875.3894  | 920.4108         | 903.3843  | G | 2171.1707        | 2154.1441        | 20 |
| 10 | 1005.5000 | 988.4734  | <b>1033.4949</b> | 1016.4684 | L | 2114.1492        | 2097.1226        | 19 |
| 11 | 1104.5684 | 1087.5419 | 1132.5633        | 1115.5368 | V | 2001.0651        | 1984.0386        | 18 |
| 12 | 1201.6212 | 1184.5946 | 1229.6161        | 1212.5895 | P | <b>1901.9967</b> | 1884.9702        | 17 |
| 13 | 1314.7052 | 1297.6787 | 1342.7001        | 1325.6736 | I | 1804.9440        | 1787.9174        | 16 |
| 14 | 1413.7736 | 1396.7471 | 1441.7686        | 1424.7420 | V | <b>1691.8599</b> | 1674.8333        | 15 |
| 15 | 1542.8162 | 1525.7897 | 1570.8112        | 1553.7846 | E | <b>1592.7915</b> | 1575.7649        | 14 |
| 16 | 1639.8690 | 1622.8425 | 1667.8639        | 1650.8374 | P | <b>1463.7489</b> | 1446.7223        | 13 |
| 17 | 1768.9116 | 1751.8850 | 1796.9065        | 1779.8800 | E | 1366.6961        | 1349.6696        | 12 |
| 18 | 1881.9957 | 1864.9691 | 1909.9906        | 1892.9640 | I | <b>1237.6535</b> | 1220.6270        | 11 |
| 19 | 1995.0797 | 1978.0532 | 2023.0746        | 2006.0481 | L | <b>1124.5695</b> | <b>1107.5429</b> | 10 |
| 20 | 2108.1638 | 2091.1372 | 2136.1587        | 2119.1321 | L | <b>1011.4854</b> | 994.4588         | 9  |
| 21 | 2223.1907 | 2206.1642 | 2251.1856        | 2234.1591 | D | <b>898.4013</b>  | <b>881.3748</b>  | 8  |
| 22 | 2280.2122 | 2263.1856 | 2308.2071        | 2291.1806 | G | <b>783.3744</b>  | 766.3478         | 7  |
| 23 | 2409.2548 | 2392.2282 | 2437.2497        | 2420.2231 | E | <b>726.3529</b>  | 709.3264         | 6  |
| 24 | 2546.3137 | 2529.2871 | 2574.3086        | 2557.2821 | H | <b>597.3103</b>  | <b>580.2838</b>  | 5  |
| 25 | 2603.3352 | 2586.3086 | 2631.3301        | 2614.3035 | G | <b>460.2514</b>  | 443.2249         | 4  |
| 26 | 2716.4192 | 2699.3927 | 2744.4141        | 2727.3876 | I | 403.2300         | 386.2034         | 3  |
| 27 | 2831.4462 | 2814.4196 | 2859.4411        | 2842.4145 | D | 290.1459         | 273.1193         | 2  |
| 28 |           |           |                  |           | R | <b>175.1190</b>  | 158.0924         | 1  |

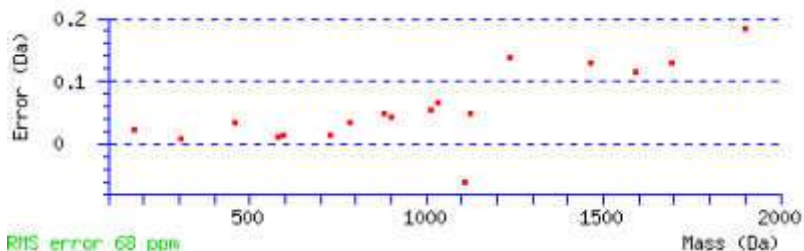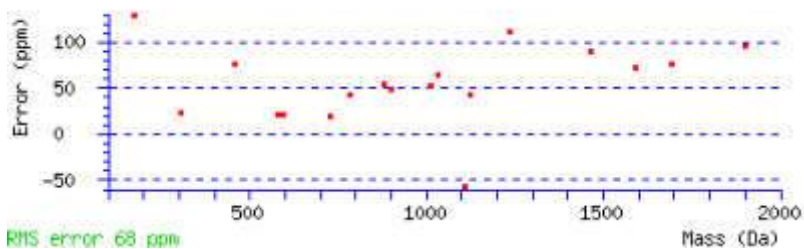

NCBI **BLAST** search of [YAAISQDNGLVPIVEPEILLDGEHGIDR](#)  
 (Parameters: blastp, nr protein database, expect=20000, no filter, PAM30)  
 Other BLAST [web gateways](#)

#### All matches to this query

| Score | Mr(calc)  | Delta  | Sequence                                     |
|-------|-----------|--------|----------------------------------------------|
| 47.2  | 3032.5455 | 0.1143 | <a href="#">YAAISQDNGLVPIVEPEILLDGEHGIDR</a> |
| 31.6  | 3032.5455 | 0.1143 | <a href="#">YAAISQDNGLVPIVEPEILLDGDHGIER</a> |

|     |           |         |                                                 |
|-----|-----------|---------|-------------------------------------------------|
| 5.0 | 3032.7539 | -0.0942 | <a href="#">LSHLNFVLDILLPHSIHLEILVQTLR</a>      |
| 3.6 | 3032.5957 | 0.0640  | <a href="#">LGIEPYSVEVLPSGELLILDSANSNLYK</a>    |
| 1.9 | 3032.7539 | -0.0941 | <a href="#">LAHLNYVLDLLIPHSIHLEILVQTLR</a>      |
| 1.7 | 3032.5165 | 0.1432  | <a href="#">TPADVTAFTVLVSNYTAAVTDLYGMGAR</a>    |
| 1.7 | 3032.5224 | 0.1374  | <a href="#">VIGILADEHHVRAAGQCHGNDPVGAGAR</a>    |
| 0.6 | 3032.5140 | 0.1457  | <a href="#">MLLGFEGICAIQSVPIYVSEVAPYNYR</a>     |
| 0.4 | 3032.4696 | 0.1902  | <a href="#">TTMDSHEGADITGAFRPGVLAALMGVSGAGK</a> |
| 0.1 | 3032.8552 | -0.1955 | <a href="#">FSRPIIPDIKIMLVVAVSVIIGLVIGR</a>     |

**Mascot:** <http://www.matrixscience.com/>


**Mascot Search Results**
**Peptide View**    **Spot no 129**
MS/MS Fragmentation of **IFTAAWEVPPVFR**Found in **gi115456389** in **NCBIInr**, Os03g0831500 [Oryza sativa Japonica Group]

Match to Query 6: 1531.939524 from(1532.946800,1+) intensity(0.0000) index(2)

Title: Label: C7, Spot\_Id: 228940, Peak\_List\_Id: 257494, MSMS Job\_Run\_Id: 24921, Comment:

Data file ppw\_C7\_138985139300.txt

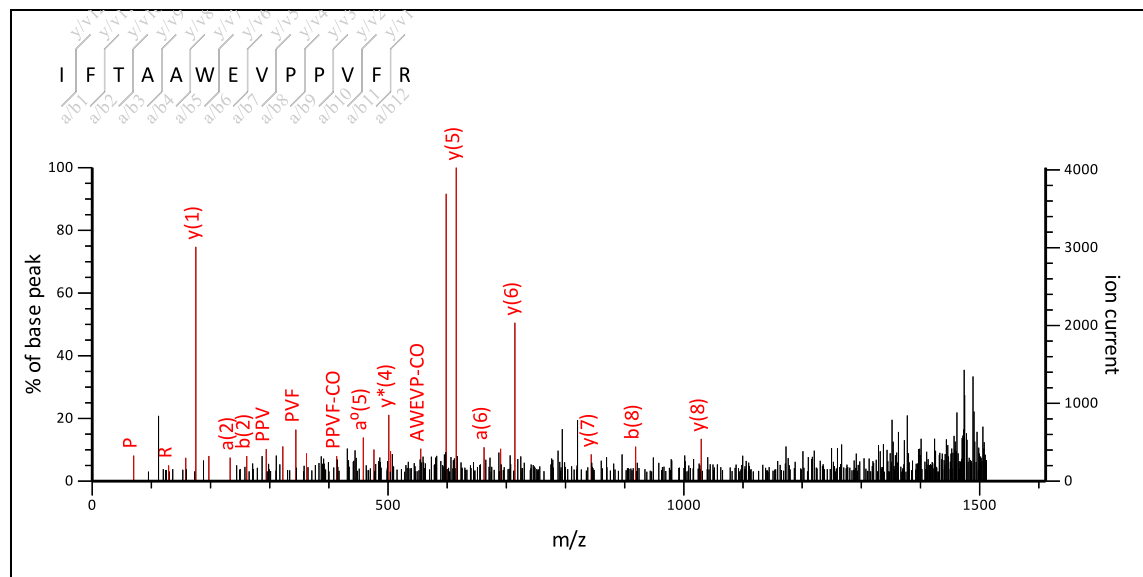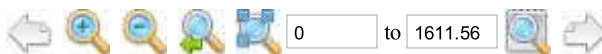Label all possible matches  Label matches used for scoring Monoisotopic mass of neutral peptide  $M_r(\text{calc})$ : 1531.8187

Fixed modifications: Carbamidomethyl (C) (apply to specified residues or termini only)

Ions Score: 21 Expect: 7.4

Matches : 32/193 fragment ions using 60 most intense peaks ([help](#))

| #  | Immon.          | a               | a <sup>0</sup>  | b               | b <sup>0</sup>  | d         | d'       | Seq. | v               | w         | w'        | y                | y*              | y <sup>0</sup> | #  |
|----|-----------------|-----------------|-----------------|-----------------|-----------------|-----------|----------|------|-----------------|-----------|-----------|------------------|-----------------|----------------|----|
| 1  | 86.0964         | 86.0964         |                 | 114.0913        |                 | 44.0495   |          | I    |                 |           |           |                  |                 |                | 13 |
| 2  | 120.0808        | <b>233.1648</b> |                 | <b>261.1598</b> |                 |           |          | F    | 1327.6793       |           |           | 1419.7419        | 1402.7154       | 1401.7314      | 12 |
| 3  | 74.0600         | 334.2125        | 316.2020        | <b>362.2074</b> | <b>344.1969</b> | 318.2176  | 320.1969 | T    | 1226.6317       | 1239.6521 | 1241.6313 | 1272.6735        | 1255.6470       | 1254.6630      | 11 |
| 4  | 44.0495         | 405.2496        | 387.2391        | 433.2445        | 415.2340        |           |          | A    | 1155.5946       |           |           | 1171.6259        | 1154.5993       | 1153.6153      | 10 |
| 5  | 44.0495         | <b>476.2867</b> | <b>458.2762</b> | <b>504.2817</b> | 486.2711        |           |          | A    | 1084.5574       |           |           | 1100.5887        | 1083.5622       | 1082.5782      | 9  |
| 6  | 159.0917        | <b>662.3661</b> | 644.3555        | <b>690.3610</b> | 672.3504        |           |          | W    | 898.4781        |           |           | <b>1029.5516</b> | 1012.5251       | 1011.5411      | 8  |
| 7  | 102.0550        | 791.4087        | 773.3981        | 819.4036        | 801.3930        | 733.4032  |          | E    | 769.4355        | 768.4403  |           | <b>843.4723</b>  | 826.4458        | 825.4618       | 7  |
| 8  | 72.0808         | 890.4771        | 872.4665        | <b>918.4720</b> | 900.4614        | 876.4614  |          | V    | 670.3671        | 683.3875  |           | <b>714.4297</b>  | 697.4032        |                | 6  |
| 9  | <b>70.0651</b>  | 987.5298        | 969.5193        | 1015.5247       | 997.5142        | 961.5142  |          | P    | 573.3144        | 572.3191  |           | <b>615.3613</b>  | <b>598.3348</b> |                | 5  |
| 10 | <b>70.0651</b>  | 1084.5826       | 1066.5720       | 1112.5775       | 1094.5669       | 1058.5669 |          | P    | <b>476.2616</b> | 475.2663  |           | 518.3085         | <b>501.2820</b> |                | 4  |
| 11 | 72.0808         | 1183.6510       | 1165.6404       | 1211.6459       | 1193.6354       | 1169.6354 |          | V    | 377.1932        | 390.2136  |           | 421.2558         | 404.2292        |                | 3  |
| 12 | 120.0808        | 1330.7194       | 1312.7089       | 1358.7143       | 1340.7038       |           |          | F    | 230.1248        |           |           | <b>322.1874</b>  | 305.1608        |                | 2  |
| 13 | <b>129.1135</b> |                 |                 |                 |                 |           |          | R    | 74.0237         | 73.0284   |           | <b>175.1190</b>  | <b>158.0924</b> |                | 1  |

| Seq   | ya       | yb       | Seq    | ya       | yb       | Seq   | ya       | yb       |
|-------|----------|----------|--------|----------|----------|-------|----------|----------|
| FT    | 221.1285 | 249.1234 | FTA    | 292.1656 | 320.1605 | FTAA  | 363.2027 | 391.1976 |
| FTAAW | 549.2820 | 577.2769 | FTAAWE | 678.3246 | 706.3195 | TA    | 145.0972 | 173.0921 |
| TAA   | 216.1343 | 244.1292 | TAAW   | 402.2136 | 430.2085 | TAAWE | 531.2562 | 559.2511 |

|               |                 |                 |               |          |                 |               |                 |                 |
|---------------|-----------------|-----------------|---------------|----------|-----------------|---------------|-----------------|-----------------|
| <b>TAWEV</b>  | 630.3246        | 658.3195        | <b>AA</b>     | 115.0866 | 143.0815        | <b>AAW</b>    | 301.1659        | 329.1608        |
| <b>AAWE</b>   | 430.2085        | <b>458.2034</b> | <b>AAWEV</b>  | 529.2769 | 557.2718        | <b>AAWEVP</b> | 626.3297        | 654.3246        |
| <b>AW</b>     | 230.1288        | 258.1237        | <b>AWE</b>    | 359.1714 | 387.1663        | <b>AWEV</b>   | <b>458.2398</b> | 486.2347        |
| <b>AWEVP</b>  | <b>555.2926</b> | 583.2875        | <b>AWEVPP</b> | 652.3453 | 680.3402        | <b>WE</b>     | 288.1343        | 316.1292        |
| <b>WEV</b>    | 387.2027        | 415.1976        | <b>WEVP</b>   | 484.2554 | 512.2504        | <b>WEVPP</b>  | 581.3082        | 609.3031        |
| <b>WEVPPV</b> | 680.3766        | 708.3715        | <b>EV</b>     | 201.1234 | 229.1183        | <b>EVP</b>    | 298.1761        | 326.1710        |
| <b>EVPP</b>   | 395.2289        | 423.2238        | <b>EVPPV</b>  | 494.2973 | 522.2922        | <b>EVPPVF</b> | 641.3657        | 669.3606        |
| <b>VP</b>     | 169.1335        | <b>197.1285</b> | <b>VPP</b>    | 266.1863 | <b>294.1812</b> | <b>VPPV</b>   | 365.2547        | 393.2496        |
| <b>VPPVF</b>  | 512.3231        | 540.3180        | <b>PP</b>     | 167.1179 | 195.1128        | <b>PPV</b>    | 266.1863        | <b>294.1812</b> |
| <b>PPVF</b>   | <b>413.2547</b> | 441.2496        | <b>PV</b>     | 169.1335 | <b>197.1285</b> | <b>PVF</b>    | 316.2020        | <b>344.1969</b> |
| <b>VF</b>     | 219.1492        | 247.1441        |               |          |                 |               |                 |                 |

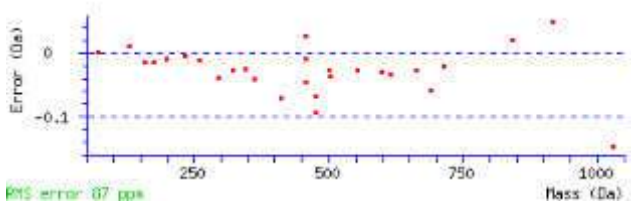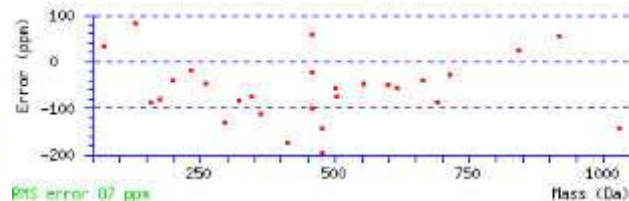

NCBI BLAST search of [JETAWEVPPVFR](#)

(Parameters: blastp, nr protein database, expect=20000, no filter, PAM30)

Other BLAST [web gateways](#)

#### All matches to this query

| Score | Mr(calc)  | Delta  | Sequence                         |
|-------|-----------|--------|----------------------------------|
| 21.3  | 1531.8187 | 0.1208 | <a href="#">JETAWEVPPVFR</a>     |
| 17.9  | 1531.8181 | 0.1215 | <a href="#">AYQAOKEVMVIPR</a>    |
| 15.2  | 1531.8028 | 0.1367 | <a href="#">TMIAASVPINSASVR</a>  |
| 13.6  | 1531.8107 | 0.1289 | <a href="#">KGTOAFGSASPALAAR</a> |
| 8.1   | 1531.7969 | 0.1426 | <a href="#">AMHFKDLPSLAFR</a>    |
| 8.1   | 1531.8293 | 0.1103 | <a href="#">ARFLMALLADANAR</a>   |
| 7.3   | 1531.7882 | 0.1513 | <a href="#">EIFNADDLVEVLR</a>    |
| 7.0   | 1531.7889 | 0.1506 | <a href="#">LRSMRPGGSATDLR</a>   |
| 6.4   | 1531.8107 | 0.1288 | <a href="#">VSNSVOGGNGIVVFR</a>  |
| 6.4   | 1531.8246 | 0.1149 | <a href="#">ALPAATSTTFLNPK</a>   |

Mascot: <http://www.matrixscience.com/>

**MATRIX SCIENCE Mascot Search Results**

**Peptide View Spot no 129**

MS/MS Fragmentation of **GIAHITGGGFTDNIPR**

Found in **gi|115456389** in **NCBI nr**, Os03g0831500 [Oryza sativa Japonica Group]

Match to Query 8: 1624.974324 from(1625.981600,1+) intensity(0.0000) index(3)

Title: Label: C7, Spot\_Id: 228940, Peak\_List\_Id: 257495, MSMS Job\_Run\_Id: 24921, Comment:

Data file ppw\_C7\_138985139300.txt

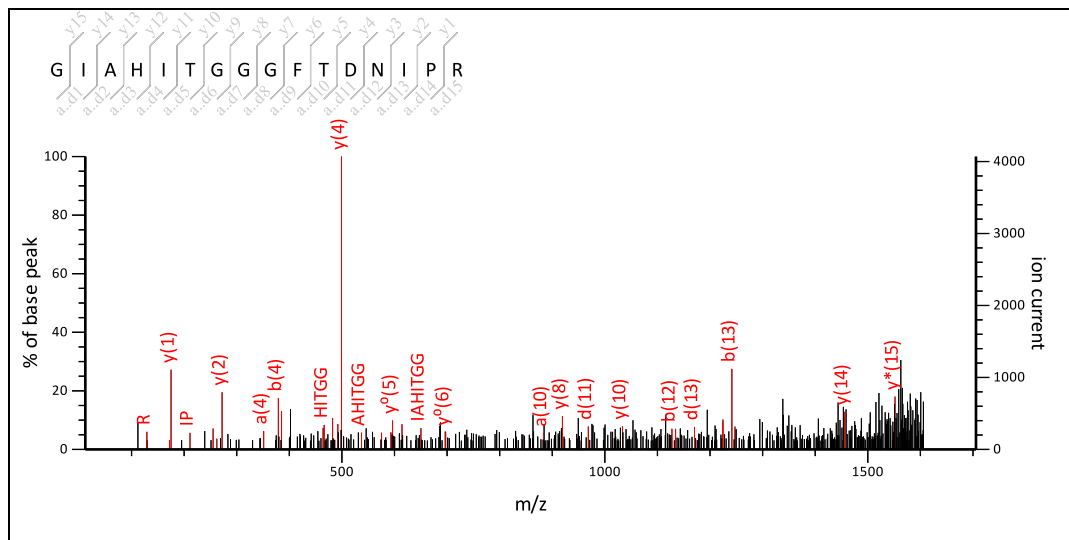

Navigation icons: Home, Back, Forward, Search, and a search range input box showing '12.09 to 1705.72'.

Label all possible matches  Label matches used for scoring

Monoisotopic mass of neutral peptide Mr(calc): 1624.8322

Fixed modifications: Carbamidomethyl (C) (apply to specified residues or termini only)

Ions Score: 32 Expect: 0.79

Matches : 39/277 fragment ions using 105 most intense peaks [\(help\)](#)

| #  | Immon.   | a         | a*        | a <sup>0</sup> | b         | b*        | b <sup>0</sup> | d         | d'        | Seq. | v         | w         | w'        | y         | y*        |
|----|----------|-----------|-----------|----------------|-----------|-----------|----------------|-----------|-----------|------|-----------|-----------|-----------|-----------|-----------|
| 1  | 30.0338  | 30.0338   |           |                | 58.0287   |           |                | 44.0495   |           | G    |           |           |           |           |           |
| 2  | 86.0964  | 143.1179  |           |                | 171.1128  |           |                | 115.0866  | 129.1022  | I    | 1510.7397 | 1523.7601 | 1537.7758 | 1568.8180 | 1551.7914 |
| 3  | 44.0495  | 214.1550  |           |                | 242.1499  |           |                |           |           | A    | 1439.7026 |           |           | 1455.7339 | 1438.7074 |
| 4  | 110.0713 | 351.2139  |           |                | 379.2088  |           |                |           |           | H    | 1302.6437 |           |           | 1384.6968 | 1367.6702 |
| 5  | 86.0964  | 464.2980  |           |                | 492.2929  |           |                | 436.2667  | 450.2823  | I    | 1189.5596 | 1202.5800 | 1216.5957 | 1247.6379 | 1230.6113 |
| 6  | 74.0600  | 565.3457  |           | 547.3351       | 593.3406  |           | 575.3300       | 549.3507  | 551.3300  | T    | 1088.5119 | 1101.5324 | 1103.5116 | 1134.5538 | 1117.5273 |
| 7  | 30.0338  | 622.3671  |           | 604.3566       | 650.3620  |           | 632.3515       |           |           | G    |           |           |           | 1033.5061 | 1016.4796 |
| 8  | 30.0338  | 679.3886  |           | 661.3780       | 707.3835  |           | 689.3729       |           |           | G    |           |           |           | 976.4847  | 959.4581  |
| 9  | 30.0338  | 736.4101  |           | 718.3995       | 764.4050  |           | 746.3944       |           |           | G    |           |           |           | 919.4632  | 902.4367  |
| 10 | 120.0808 | 883.4785  |           | 865.4679       | 911.4734  |           | 893.4628       |           |           | F    | 770.3791  |           |           | 862.4417  | 845.4152  |
| 11 | 74.0600  | 984.5261  |           | 966.5156       | 1012.5211 |           | 994.5105       | 968.5312  | 970.5105  | T    | 669.3315  | 682.3519  | 684.3311  | 715.3733  | 698.3468  |
| 12 | 88.0393  | 1099.5531 |           | 1081.5425      | 1127.5480 |           | 1109.5374      | 1055.5633 |           | D    | 554.3045  | 553.3093  |           | 614.3256  | 597.2991  |
| 13 | 87.0553  | 1213.5960 | 1196.5695 | 1195.5854      | 1241.5909 | 1224.5644 | 1223.5804      | 1170.5902 |           | N    | 440.2616  | 439.2663  |           | 499.2987  | 482.2722  |
| 14 | 86.0964  | 1326.6801 | 1309.6535 | 1308.6695      | 1354.6750 | 1337.6484 | 1336.6644      | 1298.6488 | 1312.6644 | I    | 327.1775  | 340.1979  | 354.2136  | 385.2558  | 368.2292  |
| 15 | 70.0651  | 1423.7328 | 1406.7063 | 1405.7223      | 1451.7278 | 1434.7012 | 1433.7172      | 1397.7172 |           | P    | 230.1248  | 229.1295  |           | 272.1717  | 255.1452  |
| 16 | 129.1135 |           |           |                |           |           |                |           |           | R    | 74.0237   | 73.0284   |           | 175.1190  | 158.0924  |

| Seq      | ya       | yb       | Seq    | ya       | yb       | Seq     | ya       | yb       |
|----------|----------|----------|--------|----------|----------|---------|----------|----------|
| IA       | 157.1335 | 185.1285 | IAH    | 294.1925 | 322.1874 | IAHI    | 407.2765 | 435.2714 |
| IAHIT    | 508.3242 | 536.3191 | IAHITG | 565.3457 | 593.3406 | IAHITGG | 622.3671 | 650.3620 |
| IAHITGGG | 679.3886 | 707.3835 | AH     | 181.1084 | 209.1033 | AHI     | 294.1925 | 322.1874 |
| AHIT     | 395.2401 | 423.2350 | AHITG  | 452.2616 | 480.2565 | AHITGG  | 509.2831 | 537.2780 |

|         |          |          |        |          |          |        |          |          |
|---------|----------|----------|--------|----------|----------|--------|----------|----------|
| AHITGGG | 566.3045 | 594.2994 | HI     | 223.1553 | 251.1503 | HIT    | 324.2030 | 352.1979 |
| HITG    | 381.2245 | 409.2194 | HITGG  | 438.2459 | 466.2409 | HITGGG | 495.2674 | 523.2623 |
| HITGGGF | 642.3358 | 670.3307 | IT     | 187.1441 | 215.1390 | ITG    | 244.1656 | 272.1605 |
| ITGG    | 301.1870 | 329.1819 | ITGGG  | 358.2085 | 386.2034 | ITGGGF | 505.2769 | 533.2718 |
| ITGGGF  | 606.3246 | 634.3195 | TG     | 131.0815 | 159.0764 | TGG    | 188.1030 | 216.0979 |
| TGGG    | 245.1244 | 273.1193 | TGGGF  | 392.1928 | 420.1878 | TGGGF  | 493.2405 | 521.2354 |
| TGGGFTD | 608.2675 | 636.2624 | GG     | 87.0553  | 115.0502 | GGG    | 144.0768 | 172.0717 |
| GGGF    | 291.1452 | 319.1401 | GGGFT  | 392.1928 | 420.1878 | GGGFTD | 507.2198 | 535.2147 |
| GGGFTDN | 621.2627 | 649.2576 | GG     | 87.0553  | 115.0502 | GGF    | 234.1237 | 262.1186 |
| GGFT    | 335.1714 | 363.1663 | GGFTD  | 450.1983 | 478.1932 | GGFTDN | 564.2413 | 592.2362 |
| GGFTDNI | 677.3253 | 705.3202 | GF     | 177.1022 | 205.0972 | GFT    | 278.1499 | 306.1448 |
| GFTD    | 393.1769 | 421.1718 | GFTDN  | 507.2198 | 535.2147 | GFTDNI | 620.3039 | 648.2988 |
| FT      | 221.1285 | 249.1234 | FTD    | 336.1554 | 364.1503 | FTDN   | 450.1983 | 478.1932 |
| FTDNI   | 563.2824 | 591.2773 | FTDNIP | 660.3352 | 688.3301 | TD     | 189.0870 | 217.0819 |
| TDN     | 303.1299 | 331.1248 | TDNI   | 416.2140 | 444.2089 | TDNIP  | 513.2667 | 541.2617 |
| DN      | 202.0822 | 230.0771 | DNI    | 315.1663 | 343.1612 | DNIP   | 412.2191 | 440.2140 |
| NI      | 200.1394 | 228.1343 | NIP    | 297.1921 | 325.1870 | IP     | 183.1492 | 211.1441 |

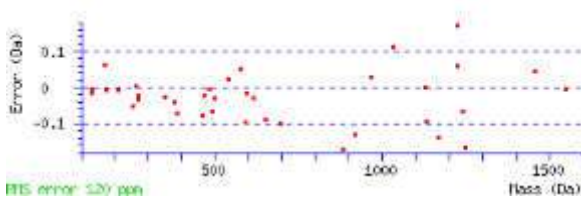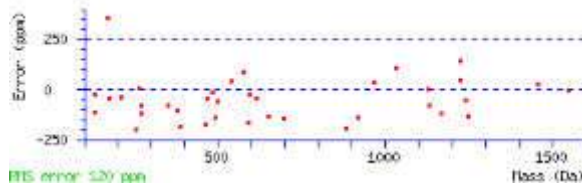

NCBI BLAST search of [GIAHITGGGFTDNIPR](#)

(Parameters: blastp, nr protein database, expect=20000, no filter, PAM30)

Other BLAST [web gateways](#)

#### All matches to this query

| Score | Mr(calc)  | Delta  | Sequence                         |
|-------|-----------|--------|----------------------------------|
| 31.5  | 1624.8322 | 0.1422 | <a href="#">GIAHITGGGFTDNIPR</a> |
| 31.5  | 1624.8322 | 0.1422 | <a href="#">GLAHITGGGFTDNIPR</a> |
| 10.1  | 1624.9260 | 0.0483 | <a href="#">SAILNDAIRVVGELR</a>  |
| 9.8   | 1624.9161 | 0.0582 | <a href="#">EALAIARFPASARPR</a>  |
| 7.5   | 1624.8429 | 0.1314 | <a href="#">ACGLPVIMPGDKVPR</a>  |
| 7.5   | 1624.8321 | 0.1422 | <a href="#">NLGENGNOLEGLPR</a>   |
| 6.3   | 1624.9162 | 0.0582 | <a href="#">KLVDVHHVAGLNPR</a>   |
| 6.0   | 1624.8249 | 0.1494 | <a href="#">LYAAYGNLEGPPIR</a>   |
| 6.0   | 1624.9664 | 0.0079 | <a href="#">AKLAADYLJAPVKPR</a>  |
| 5.6   | 1624.8533 | 0.1211 | <a href="#">ETTPPSRSVALNPR</a>   |

Mascot: <http://www.matrixscience.com/>



# Mascot Search Results

## Peptide View **Spot no 131**

### MS/MS Fragmentation of **YSLKPLVPR**

Found in **gi|114386664** in **NCBI**nr, phosphoglycerate kinase [Oryza sativa Indica Group]

Match to Query 129: 1071.698424 from(1072.705700,1+) intensity(0.0000) index(19)

Title: Label: I12, Spot\_Id: 219858, Peak\_List\_Id: 227380, MSMS Job\_Run\_Id: 21960, Comment:

Data file C:\Documents and Settings\Administrator\Desktop\Farah-Garima 11May 2013\ppw\_I12\_136868236700.txt

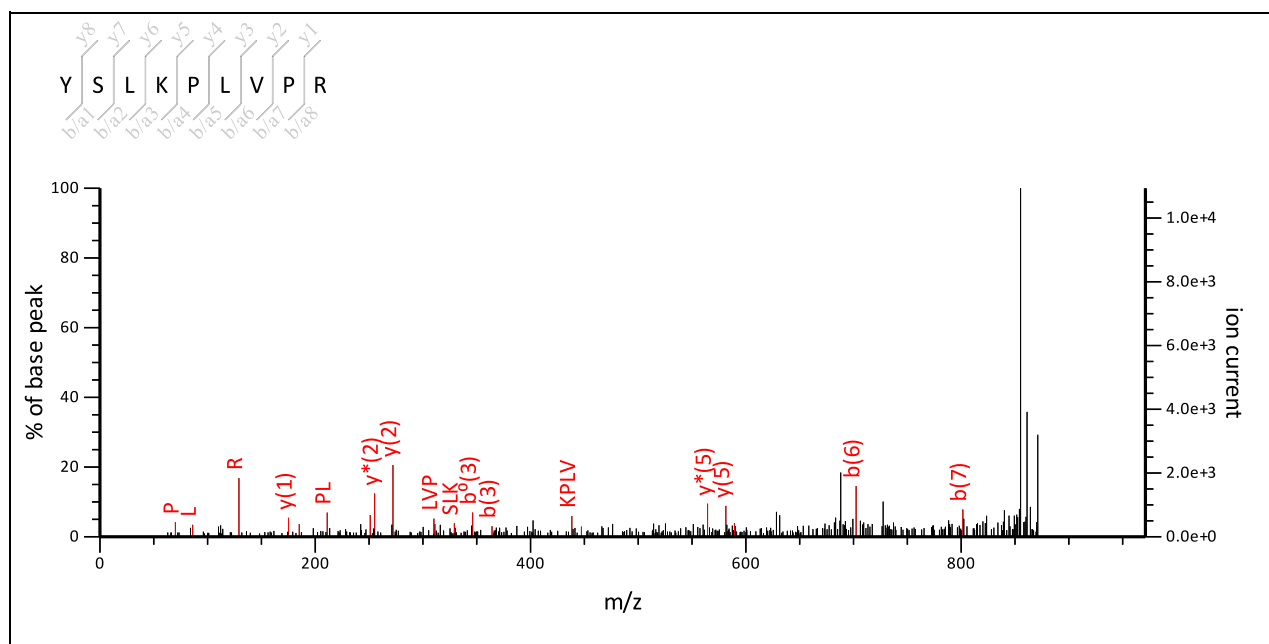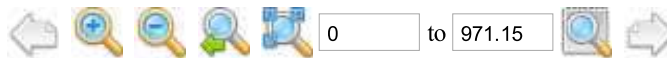

Label all possible matches  Label matches used for scoring

**Monoisotopic mass of neutral peptide Mr(calc):** 1071.6440

**Fixed modifications:** Carbamidomethyl (C) (apply to specified residues or termini only)

**Ions Score:** 19 **Expect:** 1.8e+02

**Matches:** 25/130 fragment ions using 45 most intense peaks ([help](#))

| # | Immon.          | a        | a*              | a <sup>0</sup> | b               | b*       | b <sup>0</sup>  | d        | Seq.     | v        | w        | y               | y*              | y <sup>0</sup> | #        |
|---|-----------------|----------|-----------------|----------------|-----------------|----------|-----------------|----------|----------|----------|----------|-----------------|-----------------|----------------|----------|
| 1 | 136.0757        | 136.0757 |                 |                | 164.0706        |          |                 | 44.0495  | <b>Y</b> |          |          |                 |                 |                | <b>9</b> |
| 2 | 60.0444         | 223.1077 |                 | 205.0972       | <b>251.1026</b> |          | 233.0921        | 207.1128 | <b>S</b> | 877.5618 | 876.5666 | 909.5880        | 892.5615        | 891.5774       | <b>8</b> |
| 3 | <b>86.0964</b>  | 336.1918 |                 | 318.1812       | <b>364.1867</b> |          | <b>346.1761</b> | 294.1448 | <b>L</b> | 764.4777 | 763.4825 | 822.5560        | 805.5294        |                | <b>7</b> |
| 4 | 101.1073        | 464.2867 | <b>447.2602</b> | 446.2762       | 492.2817        | 475.2551 | 474.2711        | 407.2289 | <b>K</b> | 636.3828 | 635.3875 | 709.4719        | 692.4454        |                | <b>6</b> |
| 5 | <b>70.0651</b>  | 561.3395 | 544.3130        | 543.3289       | <b>589.3344</b> | 572.3079 | 571.3239        | 535.3239 | <b>P</b> | 539.3300 | 538.3348 | <b>581.3770</b> | <b>564.3504</b> |                | <b>5</b> |
| 6 | <b>86.0964</b>  | 674.4236 | 657.3970        | 656.4130       | <b>702.4185</b> | 685.3919 | 684.4079        | 632.3766 | <b>L</b> | 426.2459 | 425.2507 | 484.3242        | 467.2976        |                | <b>4</b> |
| 7 | 72.0808         | 773.4920 | 756.4654        | 755.4814       | <b>801.4869</b> | 784.4604 | 783.4763        | 759.4763 | <b>V</b> | 327.1775 | 340.1979 | 371.2401        | 354.2136        |                | <b>3</b> |
| 8 | <b>70.0651</b>  | 870.5448 | 853.5182        | 852.5342       | 898.5397        | 881.5131 | 880.5291        | 844.5291 | <b>P</b> | 230.1248 | 229.1295 | <b>272.1717</b> | <b>255.1452</b> |                | <b>2</b> |
| 9 | <b>129.1135</b> |          |                 |                |                 |          |                 |          | <b>R</b> | 74.0237  | 73.0284  | <b>175.1190</b> | 158.0924        |                | <b>1</b> |

| Seq          | ya              | yb       | Seq           | ya       | yb              | Seq          | ya       | yb       |
|--------------|-----------------|----------|---------------|----------|-----------------|--------------|----------|----------|
| <b>SL</b>    | 173.1285        | 201.1234 | <b>SLK</b>    | 301.2234 | <b>329.2183</b> | <b>SLKP</b>  | 398.2762 | 426.2711 |
| <b>SLKPL</b> | 511.3602        | 539.3552 | <b>SLKPLV</b> | 610.4287 | 638.4236        | <b>LK</b>    | 214.1914 | 242.1863 |
| <b>LKP</b>   | <b>311.2442</b> | 339.2391 | <b>LKPL</b>   | 424.3282 | 452.3231        | <b>LKPLV</b> | 523.3966 | 551.3915 |



|               |          |                 |              |          |          |            |                 |                 |
|---------------|----------|-----------------|--------------|----------|----------|------------|-----------------|-----------------|
| <b>LKPLVP</b> | 620.4494 | 648.4443        | <b>KP</b>    | 198.1601 | 226.1550 | <b>KPL</b> | <b>311.2442</b> | 339.2391        |
| <b>KPLV</b>   | 410.3126 | <b>438.3075</b> | <b>KPLVP</b> | 507.3653 | 535.3602 | <b>PL</b>  | 183.1492        | <b>211.1441</b> |
| <b>PLV</b>    | 282.2176 | <b>310.2125</b> | <b>PLVP</b>  | 379.2704 | 407.2653 | <b>LV</b>  | <b>185.1648</b> | 213.1598        |
| <b>LVP</b>    | 282.2176 | <b>310.2125</b> | <b>VP</b>    | 169.1335 | 197.1285 |            |                 |                 |

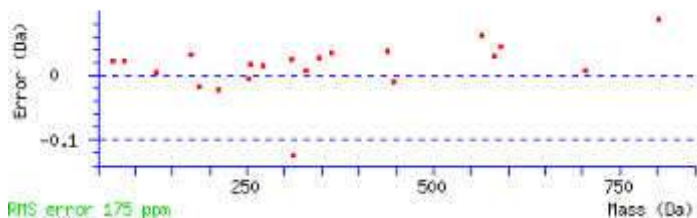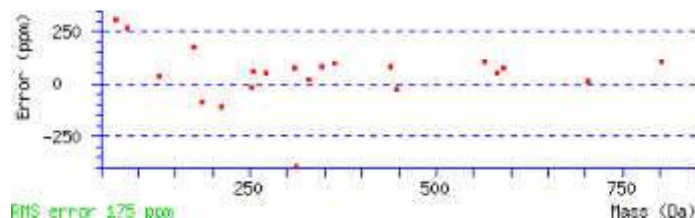

NCBI **BLAST** search of [YSLKPLVPR](#)

(Parameters: blastp, nr protein database, expect=20000, no filter, PAM30)

Other BLAST [web gateways](#)

#### All matches to this query

| Score | Mr(calc)  | Delta  | Sequence                   |
|-------|-----------|--------|----------------------------|
| 23.3  | 1071.6553 | 0.0431 | <a href="#">HLLPVAAVPR</a> |
| 19.4  | 1071.6440 | 0.0544 | <a href="#">YSLKPLVPR</a>  |
| 17.5  | 1071.6110 | 0.0874 | <a href="#">KLSEMLVPR</a>  |
| 16.8  | 1071.6189 | 0.0795 | <a href="#">DRLVLFVPR</a>  |
| 16.5  | 1071.6077 | 0.0908 | <a href="#">YSLIPGAVPR</a> |
| 15.9  | 1071.6077 | 0.0908 | <a href="#">LASGPYVIPR</a> |
| 15.7  | 1071.6077 | 0.0908 | <a href="#">SYLQLPVPR</a>  |
| 15.3  | 1071.6077 | 0.0908 | <a href="#">LAGELIGFPR</a> |
| 14.8  | 1071.6077 | 0.0908 | <a href="#">QSIPYLVPR</a>  |
| 14.7  | 1071.6077 | 0.0908 | <a href="#">NTLYPIVPR</a>  |

Mascot: <http://www.matrixscience.com/>

**MATRIX SCIENCE Mascot Search Results**

**Peptide View Spot no 131**

**MS/MS Fragmentation of VILASHLGRP K**

Found in **gi|114386664** in **NCBINr**, phosphoglycerate kinase [Oryza sativa Indica Group]

Match to Query 176: 1189.783624 from(1190.790900,1+) intensity(0.0000) index(23)

Title: Label: I12, Spot\_Id: 219858, Peak\_List\_Id: 227381, MSMS Job\_Run\_Id: 21960, Comment:

Data file C:\Documents and Settings\Administrator\Desktop\Farah-Garima 11May 2013\ppw\_I12\_136868236700.txt

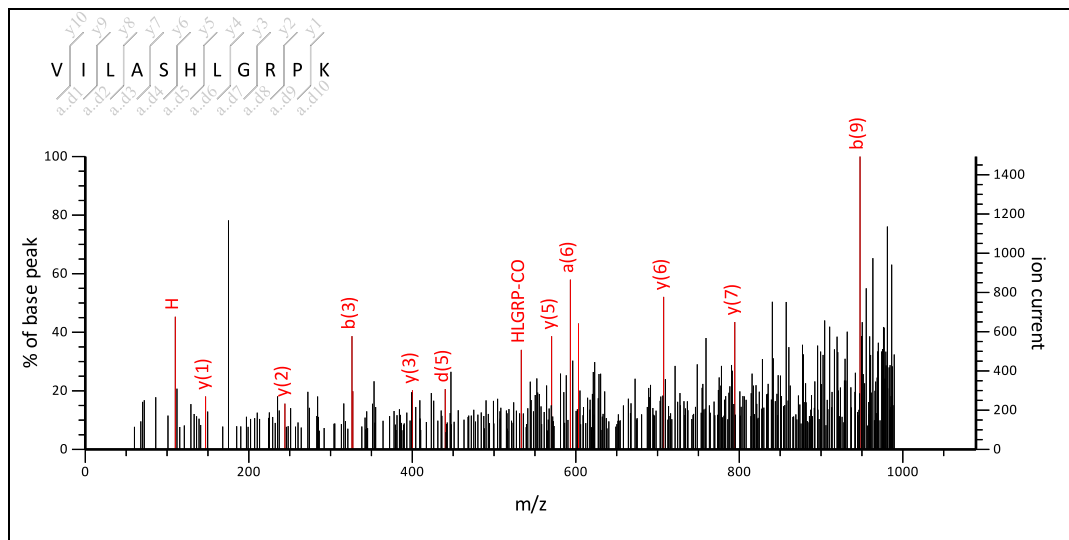

Navigation icons: Home, Back, Forward, Search, Zoom In, Zoom Out, Full Screen, Print. Search range: 0 to 1089.53.

Label all possible matches  Label matches used for scoring

Monoisotopic mass of neutral peptide Mr(calc): 1189.7295

Fixed modifications: Carbamidomethyl (C) (apply to specified residues or termini only)

Ions Score: 25 Expect: 21

Matches : 16/159 fragment ions using 30 most intense peaks (help)

| #  | Immon.          | a               | a*       | a <sup>0</sup> | b               | b*        | b <sup>0</sup>  | d               | d'       | Seq. | v         | w         | w'        | y               | y*              | y <sup>0</sup> |
|----|-----------------|-----------------|----------|----------------|-----------------|-----------|-----------------|-----------------|----------|------|-----------|-----------|-----------|-----------------|-----------------|----------------|
| 1  | 72.0808         | 72.0808         |          |                | 100.0757        |           |                 | 44.0495         |          | V    |           |           |           |                 |                 |                |
| 2  | 86.0964         | 185.1648        |          |                | 213.1598        |           |                 | 157.1335        | 171.1492 | I    | 1033.5901 | 1046.6105 | 1060.6262 | 1091.6684       | 1074.6418       | 1073.6         |
| 3  | 86.0964         | 298.2489        |          |                | <b>326.2438</b> |           |                 | 256.2020        |          | L    | 920.5061  | 919.5108  |           | 978.5843        | 961.5578        | 960.5          |
| 4  | 44.0495         | 369.2860        |          |                | 397.2809        |           |                 |                 |          | A    | 849.4690  |           |           | 865.5003        | 848.4737        | 847.4          |
| 5  | 60.0444         | 456.3180        |          | 438.3075       | 484.3130        |           | 466.3024        | <b>440.3231</b> |          | S    | 762.4369  | 761.4417  |           | <b>794.4631</b> | 777.4366        | 776.4          |
| 6  | <b>110.0713</b> | <b>593.3770</b> |          | 575.3664       | 621.3719        |           | <b>603.3613</b> |                 |          | H    | 625.3780  |           |           | <b>707.4311</b> | 690.4046        |                |
| 7  | 86.0964         | 706.4610        |          | 688.4505       | 734.4559        |           | 716.4454        | 664.4141        |          | L    | 512.2940  | 511.2987  |           | <b>570.3722</b> | 553.3457        |                |
| 8  | 30.0338         | 763.4825        |          | 745.4719       | 791.4774        |           | 773.4668        |                 |          | G    |           |           |           | 457.2881        | <b>440.2616</b> |                |
| 9  | 129.1135        | 919.5836        | 902.5570 | 901.5730       | <b>947.5785</b> | 930.5520  | 929.5679        | 834.5196        |          | R    | 299.1714  | 298.1761  |           | <b>400.2667</b> | 383.2401        |                |
| 10 | 70.0651         | 1016.6364       | 999.6098 | 998.6258       | 1044.6313       | 1027.6047 | 1026.6207       | 990.6207        |          | P    | 202.1186  | 201.1234  |           | <b>244.1656</b> | 227.1390        |                |
| 11 | 101.1073        |                 |          |                |                 |           |                 |                 |          | K    | 74.0237   | 73.0284   |           | <b>147.1128</b> | 130.0863        |                |

| Seq    | ya       | yb              | Seq     | ya              | yb       | Seq     | ya       | yb       |
|--------|----------|-----------------|---------|-----------------|----------|---------|----------|----------|
| IL     | 199.1805 | 227.1754        | ILA     | 270.2176        | 298.2125 | ILAS    | 357.2496 | 385.2445 |
| ILASH  | 494.3085 | 522.3035        | ILASHL  | 607.3926        | 635.3875 | ILASHLG | 664.4141 | 692.4090 |
| LA     | 157.1335 | 185.1285        | LAS     | <b>244.1656</b> | 272.1605 | LASH    | 381.2245 | 409.2194 |
| LASHL  | 494.3085 | 522.3035        | LASHLG  | 551.3300        | 579.3249 | AS      | 131.0815 | 159.0764 |
| ASH    | 268.1404 | 296.1353        | ASHL    | 381.2245        | 409.2194 | ASHLG   | 438.2459 | 466.2409 |
| ASHLGR | 594.3471 | 622.3420        | ASHLGRP | 691.3998        | 719.3947 | SH      | 197.1033 | 225.0982 |
| SHL    | 310.1874 | 338.1823        | SHLG    | 367.2088        | 395.2037 | SHLGR   | 523.3099 | 551.3049 |
| SHLGRP | 620.3627 | 648.3576        | HL      | 223.1553        | 251.1503 | HLG     | 280.1768 | 308.1717 |
| HLGR   | 436.2779 | 464.2728        | HLGRP   | <b>533.3307</b> | 561.3256 | LG      | 143.1179 | 171.1128 |
| LGR    | 299.2190 | <b>327.2139</b> | LGRP    | 396.2718        | 424.2667 | GR      | 186.1349 | 214.1299 |

|            |          |          |           |          |          |  |  |  |
|------------|----------|----------|-----------|----------|----------|--|--|--|
| <b>GRP</b> | 283.1877 | 311.1826 | <b>RP</b> | 226.1662 | 254.1612 |  |  |  |
|------------|----------|----------|-----------|----------|----------|--|--|--|

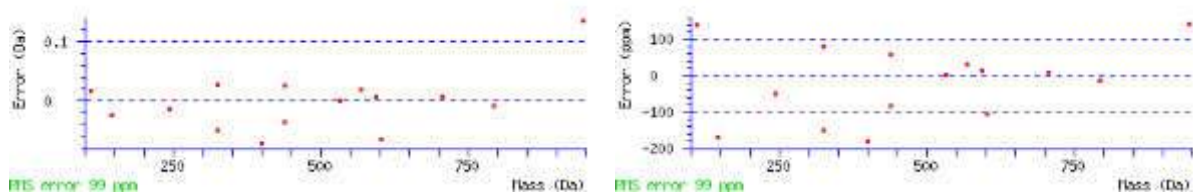

NCBI **BLAST** search of [VILASHLGRP](#)

(Parameters: blastp, nr protein database, expect=20000, no filter, PAM30)

Other BLAST [web gateways](#)

**All matches to this query**

| Score | Mr(calc)  | Delta  | Sequence                   |
|-------|-----------|--------|----------------------------|
| 26.2  | 1189.7295 | 0.0541 | <a href="#">VIASHLGRP</a>  |
| 26.2  | 1189.7295 | 0.0541 | <a href="#">VLASHLGRP</a>  |
| 26.2  | 1189.7295 | 0.0541 | <a href="#">LIVASHLGRP</a> |
| 26.2  | 1189.7295 | 0.0541 | <a href="#">LVLASHLGRP</a> |
| 24.8  | 1189.7295 | 0.0541 | <a href="#">VIIASHLGRP</a> |
| 24.8  | 1189.7295 | 0.0541 | <a href="#">VILASHLGRP</a> |
| 24.8  | 1189.7295 | 0.0541 | <a href="#">VLLASHLGRP</a> |
| 23.4  | 1189.7295 | 0.0541 | <a href="#">AILVSHLGRP</a> |
| 23.1  | 1189.7295 | 0.0541 | <a href="#">IIIGSHLGRP</a> |
| 23.1  | 1189.7295 | 0.0541 | <a href="#">IILGSHLGRP</a> |

Mascot: <http://www.matrixscience.com>


**Mascot Search Results**
**Peptide View** Spot no 131
MS/MS Fragmentation of **ELDYLVGAVANPK**Found in **gi114386664** in **NCBI**nr, phosphoglycerate kinase [Oryza sativa Indica Group]

Match to Query 207: 1387.781324 from(1388.788600,1+) intensity(0.0000) index(27)

Title: Label: I12, Spot\_Id: 219858, Peak\_List\_Id: 227394, MSMS Job\_Run\_Id: 21960, Comment:

Data file C:\Documents and Settings\Administrator\Desktop\Farah-Garima 11May 2013\ppw\_I12\_136868236700.txt

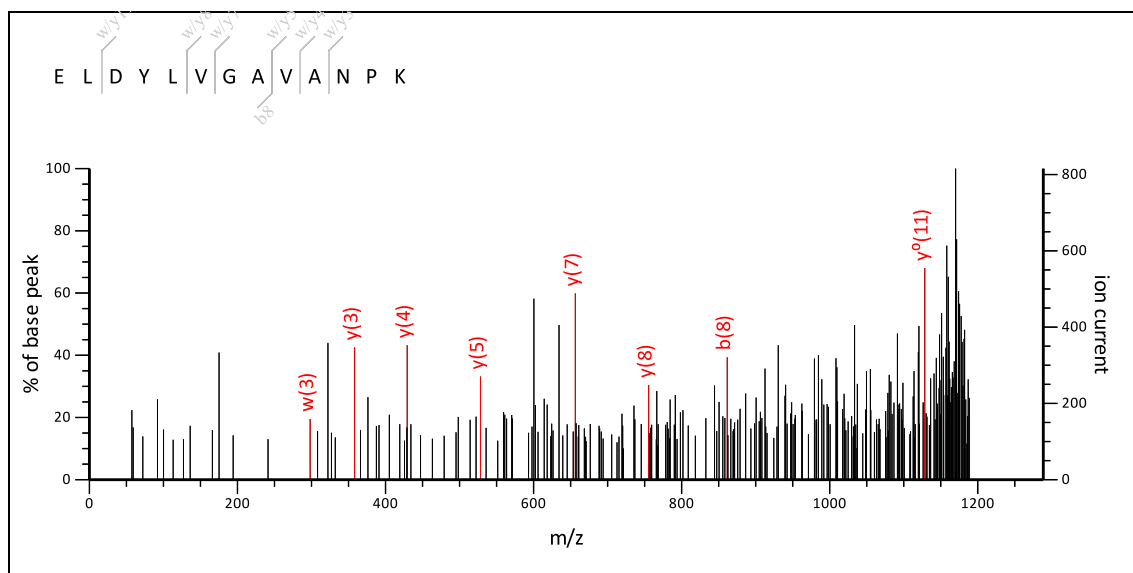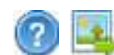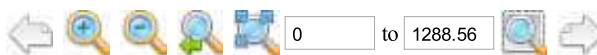Label all possible matches  Label matches used for scoring Monoisotopic mass of neutral peptide **Mr(calc)**: 1387.7347

Fixed modifications: Carbamidomethyl (C) (apply to specified residues or termini only)

Ions Score: 11 Expect: 2.7e+03

Matches : 10/206 fragment ions using 24 most intense peaks ([help](#))

| #  | Immon.   | a         | a*        | a <sup>0</sup> | b               | b*               | b <sup>0</sup> | d         | Seq. | v         | w               | y               | y*        | y <sup>0</sup>   | #  |
|----|----------|-----------|-----------|----------------|-----------------|------------------|----------------|-----------|------|-----------|-----------------|-----------------|-----------|------------------|----|
| 1  | 102.0550 | 102.0550  |           | 84.0444        | 130.0499        |                  | 112.0393       | 44.0495   | E    |           |                 |                 |           |                  | 13 |
| 2  | 86.0964  | 215.1390  |           | 197.1285       | 243.1339        |                  | 225.1234       | 173.0921  | L    | 1201.6212 | 1200.6259       | 1259.6994       | 1242.6729 | 1241.6889        | 12 |
| 3  | 88.0393  | 330.1660  |           | 312.1554       | <b>358.1609</b> |                  | 340.1503       | 286.1761  | D    | 1086.5942 | 1085.5990       | 1146.6154       | 1129.5888 | <b>1128.6048</b> | 11 |
| 4  | 136.0757 | 493.2293  |           | 475.2187       | 521.2242        |                  | 503.2136       |           | Y    | 923.5309  |                 | 1031.5884       | 1014.5619 |                  | 10 |
| 5  | 86.0964  | 606.3134  |           | 588.3028       | 634.3083        |                  | 616.2977       | 564.2664  | L    | 810.4468  | 809.4516        | 868.5251        | 851.4985  |                  | 9  |
| 6  | 72.0808  | 705.3818  |           | 687.3712       | 733.3767        |                  | 715.3661       | 691.3661  | V    | 711.3784  | 724.3988        | <b>755.4410</b> | 738.4145  |                  | 8  |
| 7  | 30.0338  | 762.4032  |           | 744.3927       | 790.3981        |                  | 772.3876       |           | G    |           |                 | <b>656.3726</b> | 639.3461  |                  | 7  |
| 8  | 44.0495  | 833.4403  |           | 815.4298       | <b>861.4353</b> |                  | 843.4247       |           | A    | 583.3198  |                 | 599.3511        | 582.3246  |                  | 6  |
| 9  | 72.0808  | 932.5088  |           | 914.4982       | 960.5037        |                  | 942.4931       | 918.4931  | V    | 484.2514  | 497.2718        | <b>528.3140</b> | 511.2875  |                  | 5  |
| 10 | 44.0495  | 1003.5459 |           | 985.5353       | 1031.5408       |                  | 1013.5302      |           | A    | 413.2143  |                 | <b>429.2456</b> | 412.2191  |                  | 4  |
| 11 | 87.0553  | 1117.5888 | 1100.5623 | 1099.5782      | 1145.5837       | <b>1128.5572</b> | 1127.5732      | 1074.5830 | N    | 299.1714  | <b>298.1761</b> | <b>358.2085</b> | 341.1819  |                  | 3  |
| 12 | 70.0651  | 1214.6416 | 1197.6150 | 1196.6310      | 1242.6365       | 1225.6099        | 1224.6259      | 1188.6259 | P    | 202.1186  | 201.1234        | 244.1656        | 227.1390  |                  | 2  |
| 13 | 101.1073 |           |           |                |                 |                  |                |           | K    | 74.0237   | 73.0284         | 147.1128        | 130.0863  |                  | 1  |

| Seq    | ya       | yb       | Seq     | ya       | yb       | Seq   | ya       | yb       |
|--------|----------|----------|---------|----------|----------|-------|----------|----------|
| LD     | 201.1234 | 229.1183 | LDY     | 364.1867 | 392.1816 | LDYL  | 477.2708 | 505.2657 |
| LDYLV  | 576.3392 | 604.3341 | LDYLVG  | 633.3606 | 661.3556 | DY    | 251.1026 | 279.0975 |
| DYL    | 364.1867 | 392.1816 | DYLV    | 463.2551 | 491.2500 | DYLVG | 520.2766 | 548.2715 |
| DYLVGA | 591.3137 | 619.3086 | DYLVGAV | 690.3821 | 718.3770 | YL    | 249.1598 | 277.1547 |
| YLV    | 348.2282 | 376.2231 | YLVG    | 405.2496 | 433.2445 | YLVGA | 476.2867 | 504.2817 |

|                        |          |          |                         |          |          |                          |          |          |
|------------------------|----------|----------|-------------------------|----------|----------|--------------------------|----------|----------|
| <a href="#">YLVGAV</a> | 575.3552 | 603.3501 | <a href="#">YLVGAVA</a> | 646.3923 | 674.3872 | <a href="#">LV</a>       | 185.1648 | 213.1598 |
| <a href="#">LVG</a>    | 242.1863 | 270.1812 | <a href="#">LVGA</a>    | 313.2234 | 341.2183 | <a href="#">LVGAV</a>    | 412.2918 | 440.2867 |
| <a href="#">LVGAVA</a> | 483.3289 | 511.3239 | <a href="#">LVGAVAN</a> | 597.3719 | 625.3668 | <a href="#">LVGAVANP</a> | 694.4246 | 722.4196 |
| <a href="#">VG</a>     | 129.1022 | 157.0972 | <a href="#">VGA</a>     | 200.1394 | 228.1343 | <a href="#">VGAV</a>     | 299.2078 | 327.2027 |
| <a href="#">VGAVA</a>  | 370.2449 | 398.2398 | <a href="#">VGAVAN</a>  | 484.2878 | 512.2827 | <a href="#">VGAVANP</a>  | 581.3406 | 609.3355 |
| <a href="#">GA</a>     | 101.0709 | 129.0659 | <a href="#">GAV</a>     | 200.1394 | 228.1343 | <a href="#">GAVA</a>     | 271.1765 | 299.1714 |
| <a href="#">GAVAN</a>  | 385.2194 | 413.2143 | <a href="#">GAVANP</a>  | 482.2722 | 510.2671 | <a href="#">AV</a>       | 143.1179 | 171.1128 |
| <a href="#">AVA</a>    | 214.1550 | 242.1499 | <a href="#">AVAN</a>    | 328.1979 | 356.1928 | <a href="#">AVANP</a>    | 425.2507 | 453.2456 |
| <a href="#">VA</a>     | 143.1179 | 171.1128 | <a href="#">VAN</a>     | 257.1608 | 285.1557 | <a href="#">VANP</a>     | 354.2136 | 382.2085 |
| <a href="#">AN</a>     | 158.0924 | 186.0873 | <a href="#">ANP</a>     | 255.1452 | 283.1401 | <a href="#">NP</a>       | 184.1081 | 212.1030 |

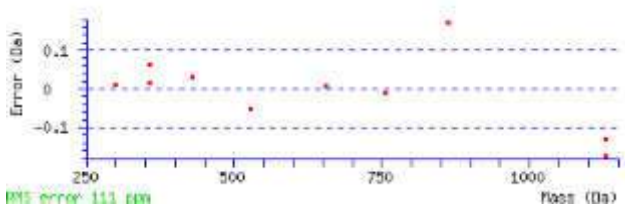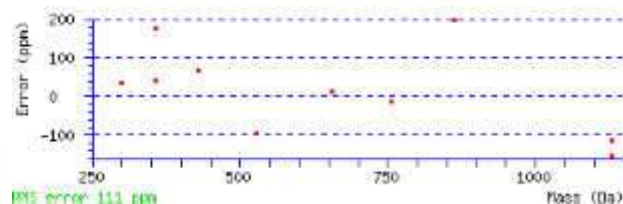

NCBI BLAST search of [ELDYLVGAVANPK](#)

(Parameters: blastp, nr protein database, expect=20000, no filter, PAM30)

Other BLAST [web gateways](#)

#### All matches to this query

| Score | Mr(calc)  | Delta   | Sequence                      |
|-------|-----------|---------|-------------------------------|
| 12.5  | 1387.6918 | 0.0895  | <a href="#">IMVVDDHQLFR</a>   |
| 12.3  | 1387.6554 | 0.1259  | <a href="#">FLNVASGNTYMR</a>  |
| 11.9  | 1387.7534 | 0.0280  | <a href="#">LFPAVQVGLGEMK</a> |
| 10.7  | 1387.7347 | 0.0466  | <a href="#">ELDYLVGAVANPK</a> |
| 10.7  | 1387.6918 | 0.0895  | <a href="#">EIVDNLVEHMR</a>   |
| 10.6  | 1387.6554 | 0.1259  | <a href="#">IEIGDQPWQMR</a>   |
| 10.3  | 1387.7857 | -0.0044 | <a href="#">LELTINALKAMR</a>  |
| 10.1  | 1387.7394 | 0.0419  | <a href="#">QVGATAKVCWLR</a>  |
| 9.8   | 1387.7307 | 0.0506  | <a href="#">NVQSIVITSTPNK</a> |
| 9.5   | 1387.7208 | 0.0605  | <a href="#">KAIASYVQDHTR</a>  |

Mascot: <http://www.matrixscience.com/>


**Mascot Search Results**
**Peptide View**      **Spot no 131**
MS/MS Fragmentation of **ADLNVPLDDAQKITDDR**Found in **gi|114386664** in **NCBINr**, phosphoglycerate kinase [Oryza sativa Indica Group]

Match to Query 219: 1999.097724 from(2000.105000,1+) intensity(0.0000) index(30)

Title: Label: I12, Spot\_Id: 219858, Peak\_List\_Id: 227401, MSMS Job\_Run\_Id: 21960, Comment:

Data file C:\Documents and Settings\Administrator\Desktop\Farah-Garima 11May 2013\ppw\_I12\_136868236700.txt

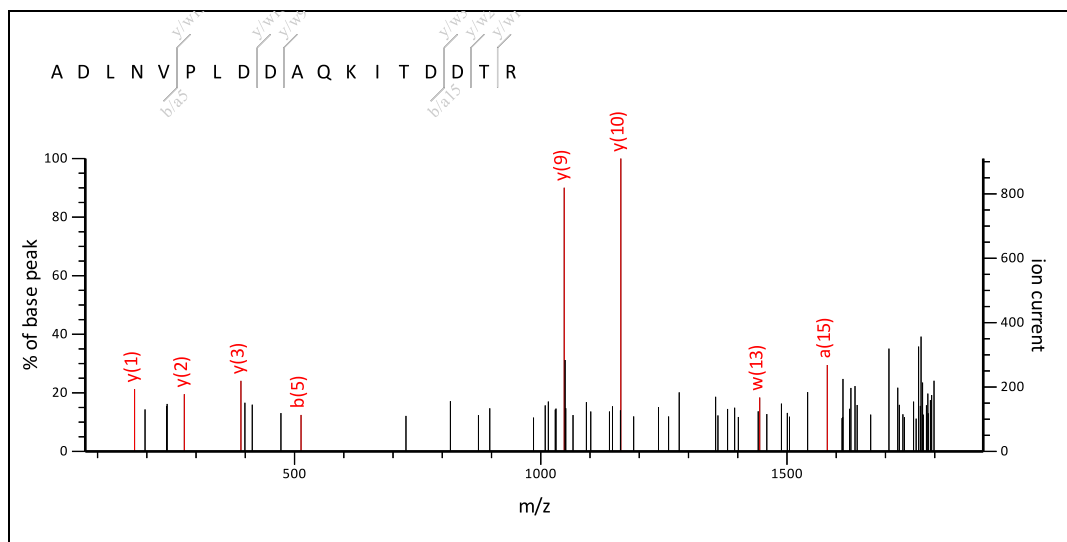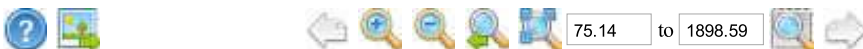Label all possible matches  Label matches used for scoring 

Monoisotopic mass of neutral peptide Mr(calc): 1998.9858

Fixed modifications: Carbamidomethyl (C) (apply to specified residues or termini only)

Ions Score: 16 Expect: 6.2e+02

Matches : 8/347 fragment ions using 16 most intense peaks ([help](#))

| #  | Immon.   | a         | a*        | a <sup>0</sup> | b         | b*        | b <sup>0</sup> | d         | d'        | Seq. | v         | w         | w'       | y         | y*        |
|----|----------|-----------|-----------|----------------|-----------|-----------|----------------|-----------|-----------|------|-----------|-----------|----------|-----------|-----------|
| 1  | 44.0495  | 44.0495   |           |                | 72.0444   |           |                | 44.0495   |           | A    |           |           |          |           |           |
| 2  | 88.0393  | 159.0764  |           | 141.0659       | 187.0713  |           | 169.0608       | 115.0866  |           | D    | 1868.9348 | 1867.9396 |          | 1928.9560 | 1911.9294 |
| 3  | 86.0964  | 272.1605  |           | 254.1499       | 300.1554  |           | 282.1448       | 230.1135  |           | L    | 1755.8508 | 1754.8555 |          | 1813.9290 | 1796.9025 |
| 4  | 87.0553  | 386.2034  | 369.1769  | 368.1928       | 414.1983  | 397.1718  | 396.1878       | 343.1976  |           | N    | 1641.8079 | 1640.8126 |          | 1700.8450 | 1683.8184 |
| 5  | 72.0808  | 485.2718  | 468.2453  | 467.2613       | 513.2667  | 496.2402  | 495.2562       | 471.2562  |           | V    | 1542.7394 | 1555.7598 |          | 1586.8020 | 1569.7755 |
| 6  | 70.0651  | 582.3246  | 565.2980  | 564.3140       | 610.3195  | 593.2930  | 592.3089       | 556.3089  |           | P    | 1445.6867 | 1444.6914 |          | 1487.7336 | 1470.7071 |
| 7  | 86.0964  | 695.4087  | 678.3821  | 677.3981       | 723.4036  | 706.3770  | 705.3930       | 653.3617  |           | L    | 1332.6026 | 1331.6074 |          | 1390.6809 | 1373.6543 |
| 8  | 88.0393  | 810.4356  | 793.4090  | 792.4250       | 838.4305  | 821.4040  | 820.4199       | 766.4458  |           | D    | 1217.5757 | 1216.5804 |          | 1277.5968 | 1260.5703 |
| 9  | 88.0393  | 925.4625  | 908.4360  | 907.4520       | 953.4575  | 936.4309  | 935.4469       | 881.4727  |           | D    | 1102.5487 | 1101.5535 |          | 1162.5699 | 1145.5433 |
| 10 | 44.0495  | 996.4997  | 979.4731  | 978.4891       | 1024.4946 | 1007.4680 | 1006.4840      |           |           | A    | 1031.5116 |           |          | 1047.5429 | 1030.5164 |
| 11 | 101.0709 | 1124.5582 | 1107.5317 | 1106.5477      | 1152.5531 | 1135.5266 | 1134.5426      | 1067.5368 |           | Q    | 903.4530  | 902.4578  |          | 976.5058  | 959.4793  |
| 12 | 101.1073 | 1252.6532 | 1235.6266 | 1234.6426      | 1280.6481 | 1263.6216 | 1262.6375      | 1195.5953 |           | K    | 775.3581  | 774.3628  |          | 848.4472  | 831.4207  |
| 13 | 86.0964  | 1365.7373 | 1348.7107 | 1347.7267      | 1393.7322 | 1376.7056 | 1375.7216      | 1337.7060 | 1351.7216 | I    | 662.2740  | 675.2944  | 689.3101 | 720.3523  | 703.3257  |
| 14 | 74.0600  | 1466.7849 | 1449.7584 | 1448.7744      | 1494.7798 | 1477.7533 | 1476.7693      | 1450.7900 | 1452.7693 | T    | 561.2263  | 574.2467  | 576.2260 | 607.2682  | 590.2416  |
| 15 | 88.0393  | 1581.8119 | 1564.7853 | 1563.8013      | 1609.8068 | 1592.7802 | 1591.7962      | 1537.8220 |           | D    | 446.1994  | 445.2041  |          | 506.2205  | 489.1940  |
| 16 | 88.0393  | 1696.8388 | 1679.8123 | 1678.8283      | 1724.8337 | 1707.8072 | 1706.8232      | 1652.8490 |           | D    | 331.1724  | 330.1772  |          | 391.1936  | 374.1670  |
| 17 | 74.0600  | 1797.8865 | 1780.8600 | 1779.8759      | 1825.8814 | 1808.8549 | 1807.8709      | 1781.8916 | 1783.8709 | T    | 230.1248  | 243.1452  | 245.1244 | 276.1666  | 259.1401  |
| 18 | 129.1135 |           |           |                |           |           |                |           |           | R    | 74.0237   | 73.0284   |          | 175.1190  | 158.0924  |

| Seq   | ya       | yb       | Seq    | ya       | yb       | Seq   | ya       | yb       |
|-------|----------|----------|--------|----------|----------|-------|----------|----------|
| DL    | 201.1234 | 229.1183 | DLN    | 315.1663 | 343.1612 | DLNV  | 414.2347 | 442.2296 |
| DLNVP | 511.2875 | 539.2824 | DLNVPL | 624.3715 | 652.3665 | LN    | 200.1394 | 228.1343 |
| LNV   | 299.2078 | 327.2027 | LNVP   | 396.2605 | 424.2554 | LVNPL | 509.3446 | 537.3395 |

|         |          |          |        |          |          |        |          |          |
|---------|----------|----------|--------|----------|----------|--------|----------|----------|
| LNVPLD  | 624.3715 | 652.3665 | NV     | 186.1237 | 214.1186 | NVP    | 283.1765 | 311.1714 |
| NVPL    | 396.2605 | 424.2554 | NVPLD  | 511.2875 | 539.2824 | NVPLDD | 626.3144 | 654.3093 |
| NVPLDDA | 697.3515 | 725.3464 | VP     | 169.1335 | 197.1285 | VPL    | 282.2176 | 310.2125 |
| VPLD    | 397.2445 | 425.2395 | VPLDD  | 512.2715 | 540.2664 | VPLDDA | 583.3086 | 611.3035 |
| PL      | 183.1492 | 211.1441 | PLD    | 298.1761 | 326.1710 | PLDD   | 413.2031 | 441.1980 |
| PLDDA   | 484.2402 | 512.2351 | PLDDAQ | 612.2988 | 640.2937 | LD     | 201.1234 | 229.1183 |
| LDD     | 316.1503 | 344.1452 | LDDA   | 387.1874 | 415.1823 | LDDAQ  | 515.2460 | 543.2409 |
| LDDAQK  | 643.3410 | 671.3359 | DD     | 203.0662 | 231.0612 | DDA    | 274.1034 | 302.0983 |
| DDAQ    | 402.1619 | 430.1569 | DDAQK  | 530.2569 | 558.2518 | DDAQKI | 643.3410 | 671.3359 |
| DA      | 159.0764 | 187.0713 | DAQ    | 287.1350 | 315.1299 | DAQK   | 415.2300 | 443.2249 |
| DAQKI   | 528.3140 | 556.3089 | DAQKIT | 629.3617 | 657.3566 | AQ     | 172.1081 | 200.1030 |
| AQK     | 300.2030 | 328.1979 | AQKI   | 413.2871 | 441.2820 | AQKIT  | 514.3348 | 542.3297 |
| AQKITD  | 629.3617 | 657.3566 | QK     | 229.1659 | 257.1608 | QKI    | 342.2500 | 370.2449 |
| QKIT    | 443.2976 | 471.2926 | QKITD  | 558.3246 | 586.3195 | QKITDD | 673.3515 | 701.3464 |
| KI      | 214.1914 | 242.1863 | KIT    | 315.2391 | 343.2340 | KITD   | 430.2660 | 458.2609 |
| KITDD   | 545.2930 | 573.2879 | KITDDT | 646.3406 | 674.3355 | IT     | 187.1441 | 215.1390 |
| ITD     | 302.1710 | 330.1660 | ITDD   | 417.1980 | 445.1929 | ITDDT  | 518.2457 | 546.2406 |
| TD      | 189.0870 | 217.0819 | TDD    | 304.1139 | 332.1088 | TDDT   | 405.1616 | 433.1565 |
| DD      | 203.0662 | 231.0612 | DDT    | 304.1139 | 332.1088 | DT     | 189.0870 | 217.0819 |

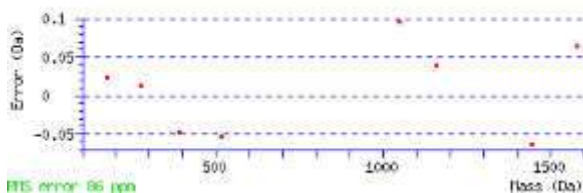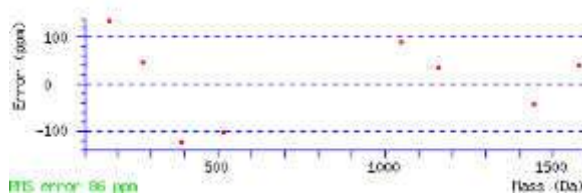

NCBI BLAST search of [ADLNVPLDDAQKITDDTR](#)

(Parameters: blastp, nr protein database, expect=20000, no filter, PAM30)

Other BLAST [web gateways](#)

#### All matches to this query

| Score | Mr(calcd) | Delta   | Sequence                              |
|-------|-----------|---------|---------------------------------------|
| 15.7  | 1998.9858 | 0.1119  | <a href="#">ADLNVPLDDAQKITDDTR</a>    |
| 11.6  | 1998.9568 | 0.1409  | <a href="#">AEEEPVTAPEMPVDKTTR</a>    |
| 10.2  | 1999.0698 | 0.0279  | <a href="#">QLLSNGLLGGSVTSKGKPEER</a> |
| 9.7   | 1998.9833 | 0.1144  | <a href="#">MTLFIPTGNLSPSPHDTR</a>    |
| 9.5   | 1998.9905 | 0.1072  | <a href="#">MSTVHGTNRPSTLINDTR</a>    |
| 9.5   | 1999.0335 | 0.0642  | <a href="#">TVPVDRVAPSTAGGTTVDTR</a>  |
| 9.1   | 1999.1354 | -0.0376 | <a href="#">LALLEAAGVDAVLVLEFTR</a>   |
| 9.0   | 1999.0999 | -0.0021 | <a href="#">FKSMTLILGIGFVGMTR</a>     |
| 7.9   | 1999.0738 | 0.0239  | <a href="#">DETLPKYVTNIIQPVNR</a>     |
| 7.8   | 1999.0024 | 0.0953  | <a href="#">FSSHRGLGLVGDVFDHTR</a>    |

Mascot: <http://www.matrixscience.com/>




**Mascot Search Results**
**Peptide View**      **Spot no 132**
MS/MS Fragmentation of **DNGLLLHIHR**Found in **gi|328682245** in **NCBI nr**, ribulose-1,5-bisphosphate carboxylase/oxygenase large subunit [Pseudocephalozia lepidozoides]

Match to Query 190: 1186.671924 from(1187.679200,1+) intensity(0.0000) index(19)

Title: Label: J4, Spot\_Id: 219731, Peak\_List\_Id: 225365, MSMS Job\_Run\_Id: 21776, Comment:

Data file C:\Documents and Settings\Administrator\Desktop\farah BHU\spot set plate\Farah-Garima 11May 2013\ppw\_J4\_136842177300.txt

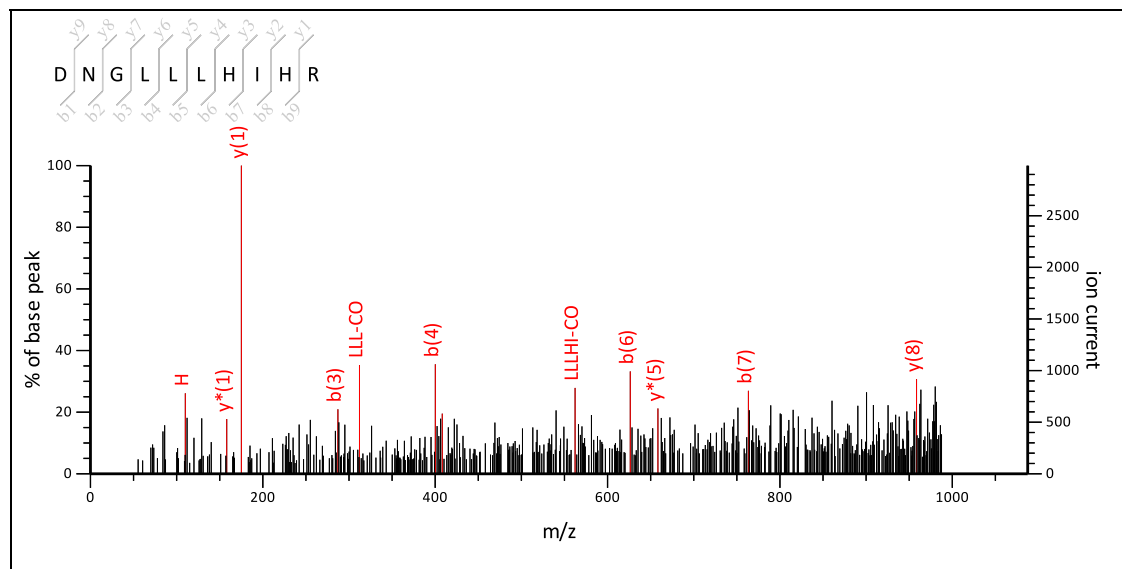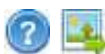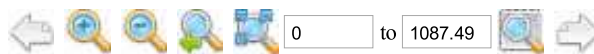Label all possible matches  Label matches used for scoring Monoisotopic mass of neutral peptide **Mr(calc)**: 1186.6571

Fixed modifications: Carbamidomethyl (C) (apply to specified residues or termini only)

Ions Score: 28 Expect: 4.9

Matches : 15/151 fragment ions using 20 most intense peaks ([help](#))

| #  | Immon.          | a        | a*       | a <sup>0</sup> | b               | b*       | b <sup>0</sup> | d        | d'       | Seq.     | v         | w         | w'       | y               | y*              | #         |
|----|-----------------|----------|----------|----------------|-----------------|----------|----------------|----------|----------|----------|-----------|-----------|----------|-----------------|-----------------|-----------|
| 1  | 88.0393         | 88.0393  |          | 70.0287        | 116.0342        |          | 98.0237        | 44.0495  |          | <b>D</b> |           |           |          |                 |                 | <b>10</b> |
| 2  | 87.0553         | 202.0822 | 185.0557 | 184.0717       | 230.0771        | 213.0506 | 212.0666       | 159.0764 |          | <b>N</b> | 1013.6003 | 1012.6051 |          | 1072.6374       | 1055.6109       | <b>9</b>  |
| 3  | 30.0338         | 259.1037 | 242.0771 | 241.0931       | <b>287.0986</b> | 270.0721 | 269.0880       |          |          | <b>G</b> |           |           |          | <b>958.5945</b> | 941.5679        | <b>8</b>  |
| 4  | 86.0964         | 372.1878 | 355.1612 | 354.1772       | <b>400.1827</b> | 383.1561 | 382.1721       | 330.1408 |          | <b>L</b> | 843.4948  | 842.4995  |          | 901.5730        | 884.5465        | <b>7</b>  |
| 5  | 86.0964         | 485.2718 | 468.2453 | 467.2613       | 513.2667        | 496.2402 | 495.2562       | 443.2249 |          | <b>L</b> | 730.4107  | 729.4155  |          | 788.4890        | 771.4624        | <b>6</b>  |
| 6  | 86.0964         | 598.3559 | 581.3293 | 580.3453       | <b>626.3508</b> | 609.3243 | 608.3402       | 556.3089 |          | <b>L</b> | 617.3267  | 616.3314  |          | 675.4049        | <b>658.3784</b> | <b>5</b>  |
| 7  | <b>110.0713</b> | 735.4148 | 718.3882 | 717.4042       | <b>763.4097</b> | 746.3832 | 745.3991       |          |          | <b>H</b> | 480.2677  |           |          | <b>562.3208</b> | 545.2943        | <b>4</b>  |
| 8  | 86.0964         | 848.4989 | 831.4723 | 830.4883       | 876.4938        | 859.4672 | 858.4832       | 820.4676 | 834.4832 | <b>I</b> | 367.1837  | 380.2041  | 394.2197 | 425.2619        | <b>408.2354</b> | <b>3</b>  |
| 9  | <b>110.0713</b> | 985.5578 | 968.5312 | 967.5472       | 1013.5527       | 996.5261 | 995.5421       |          |          | <b>H</b> | 230.1248  |           |          | <b>312.1779</b> | 295.1513        | <b>2</b>  |
| 10 | 129.1135        |          |          |                |                 |          |                |          |          | <b>R</b> | 74.0237   | 73.0284   |          | <b>175.1190</b> | <b>158.0924</b> | <b>1</b>  |

| Seq           | ya       | yb       | Seq           | ya              | yb       | Seq           | ya              | yb       |
|---------------|----------|----------|---------------|-----------------|----------|---------------|-----------------|----------|
| <b>NG</b>     | 144.0768 | 172.0717 | <b>NGL</b>    | 257.1608        | 285.1557 | <b>NGLL</b>   | 370.2449        | 398.2398 |
| <b>NGLLL</b>  | 483.3289 | 511.3239 | <b>NGLLLH</b> | 620.3879        | 648.3828 | <b>GL</b>     | 143.1179        | 171.1128 |
| <b>GLL</b>    | 256.2020 | 284.1969 | <b>GLLL</b>   | 369.2860        | 397.2809 | <b>GLLLH</b>  | 506.3449        | 534.3398 |
| <b>GLLLHI</b> | 619.4290 | 647.4239 | <b>LL</b>     | 199.1805        | 227.1754 | <b>LLL</b>    | <b>312.2646</b> | 340.2595 |
| <b>LLLH</b>   | 449.3235 | 477.3184 | <b>LLLHI</b>  | <b>562.4075</b> | 590.4024 | <b>LLLHIH</b> | 699.4664        | 727.4614 |
| <b>LL</b>     | 199.1805 | 227.1754 | <b>LLH</b>    | 336.2394        | 364.2343 | <b>LLHI</b>   | 449.3235        | 477.3184 |
| <b>LLHIH</b>  | 586.3824 | 614.3773 | <b>LH</b>     | 223.1553        | 251.1503 | <b>LHI</b>    | 336.2394        | 364.2343 |
| <b>LHIH</b>   | 473.2983 | 501.2932 | <b>HI</b>     | 223.1553        | 251.1503 | <b>HIH</b>    | 360.2142        | 388.2092 |

|           |          |          |  |  |  |  |  |
|-----------|----------|----------|--|--|--|--|--|
| <b>IH</b> | 223.1553 | 251.1503 |  |  |  |  |  |
|-----------|----------|----------|--|--|--|--|--|

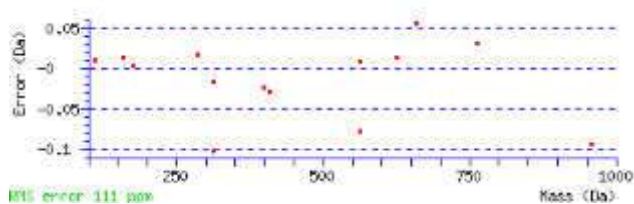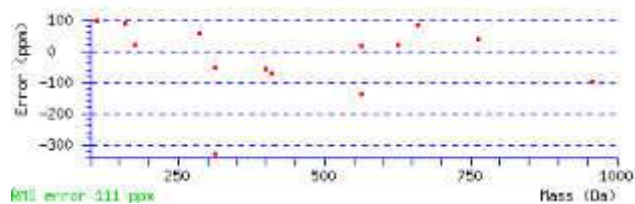

NCBI BLAST search of [DNGLLLHIHR](#)

(Parameters: blastp, nr protein database, expect=20000, no filter, PAM30)

Other BLAST [web gateways](#)

**All matches to this query**

| Score | Mr(calc)  | Delta  | Sequence                   |
|-------|-----------|--------|----------------------------|
| 28.5  | 1186.6571 | 0.0149 | <a href="#">DNGILHIHR</a>  |
| 28.5  | 1186.6571 | 0.0149 | <a href="#">DNGILLHIHR</a> |
| 28.5  | 1186.6571 | 0.0149 | <a href="#">DNGILLHIHR</a> |
| 28.5  | 1186.6571 | 0.0149 | <a href="#">DNGILLHIHR</a> |
| 28.5  | 1186.6571 | 0.0149 | <a href="#">DNGLLHIHR</a>  |
| 28.5  | 1186.6571 | 0.0149 | <a href="#">DNGLLHIHR</a>  |
| 28.5  | 1186.6571 | 0.0149 | <a href="#">DNGLLIHIHR</a> |
| 28.5  | 1186.6571 | 0.0149 | <a href="#">DNGLLIHIHR</a> |
| 28.5  | 1186.6571 | 0.0149 | <a href="#">DNGLLIHIHR</a> |
| 28.5  | 1186.6571 | 0.0149 | <a href="#">DNGLLLHIHR</a> |
| 28.5  | 1186.6571 | 0.0149 | <a href="#">DNGLLLHIHR</a> |

Mascot: <http://www.matrixscience.com/>

**MATRIX SCIENCE Mascot Search Results**

**Peptide View Spot no 132**

**MS/MS Fragmentation of DVTKGFVDLLR**

Found in **gi328682245** in **NCBI nr**, ribulose-1,5-bisphosphate carboxylase/oxygenase large subunit [Pseudocephaloza lepidiozoides]

Match to Query 226: 1261.707424 from(1262.714700,1+) intensity(0.0000) index(22)

Title: Label: J4, Spot\_Id: 219731, Peak\_List\_Id: 225380, MSMS Job\_Run\_Id: 21776, Comment:

Data file C:\Documents and Settings\Administrator\Desktop\farah BHU\spot set plate\Farah-Garima 11May 2013\ppw\_J4\_136842177300.txt

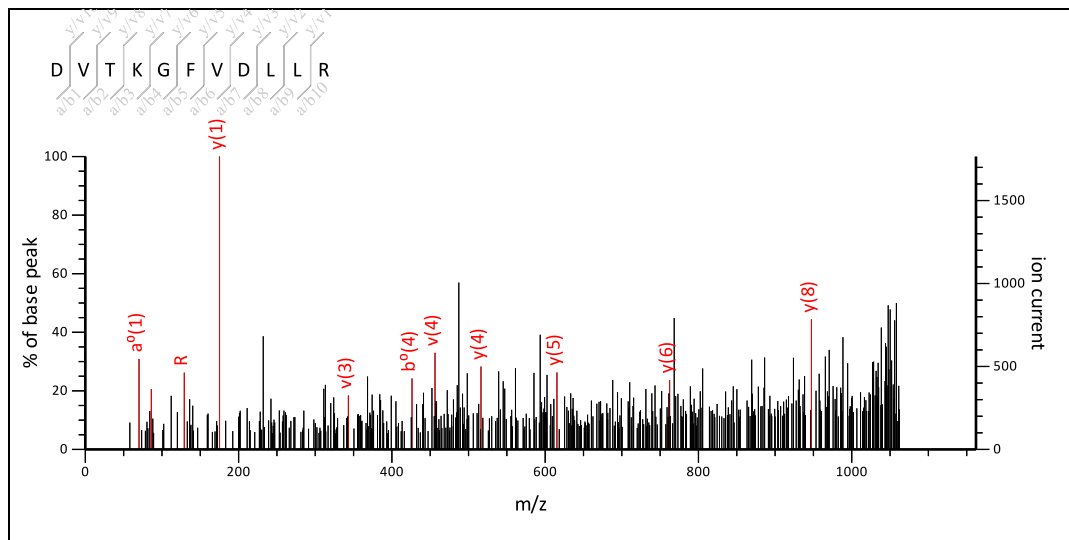

Navigation icons: Home, Back, Forward, Search, etc. Range: 0 to 1162.1

Label all possible matches  Label matches used for scoring

Monoisotopic mass of neutral peptide Mr(calc): 1261.7030

Fixed modifications: Carbamidomethyl (C) (apply to specified residues or termini only)

Ions Score: 8 Expect: 3e+02

Matches : 14/179 fragment ions using 33 most intense peaks (help)

| #  | Immon.   | a         | a*        | a <sup>0</sup> | b         | b*        | b <sup>0</sup> | d         | d'       | Seq. | v         | w         | w'        | y         | y*        |
|----|----------|-----------|-----------|----------------|-----------|-----------|----------------|-----------|----------|------|-----------|-----------|-----------|-----------|-----------|
| 1  | 88.0393  | 88.0393   |           | 70.0287        | 116.0342  |           | 98.0237        | 44.0495   |          | D    |           |           |           |           |           |
| 2  | 72.0808  | 187.1077  |           | 169.0972       | 215.1026  |           | 197.0921       | 173.0921  |          | V    | 1103.6208 | 1116.6412 |           | 1147.6834 | 1130.6568 |
| 3  | 74.0600  | 288.1554  |           | 270.1448       | 316.1503  |           | 298.1397       | 272.1605  | 274.1397 | T    | 1002.5731 | 1015.5935 | 1017.5728 | 1048.6150 | 1031.5884 |
| 4  | 101.1073 | 416.2504  | 399.2238  | 398.2398       | 444.2453  | 427.2187  | 426.2347       | 359.1925  |          | K    | 874.4781  | 873.4829  |           | 947.5673  | 930.5407  |
| 5  | 30.0338  | 473.2718  | 456.2453  | 455.2613       | 501.2667  | 484.2402  | 483.2562       |           |          | G    |           |           |           | 819.4723  | 802.4458  |
| 6  | 120.0808 | 620.3402  | 603.3137  | 602.3297       | 648.3352  | 631.3086  | 630.3246       |           |          | F    | 670.3883  |           |           | 762.4509  | 745.4243  |
| 7  | 72.0808  | 719.4087  | 702.3821  | 701.3981       | 747.4036  | 730.3770  | 729.3930       | 705.3930  |          | V    | 571.3198  | 584.3402  |           | 615.3824  | 598.3559  |
| 8  | 88.0393  | 834.4356  | 817.4090  | 816.4250       | 862.4305  | 845.4040  | 844.4199       | 790.4458  |          | D    | 456.2929  | 455.2976  |           | 516.3140  | 499.2875  |
| 9  | 86.0964  | 947.5197  | 930.4931  | 929.5091       | 975.5146  | 958.4880  | 957.5040       | 905.4727  |          | L    | 343.2088  | 342.2136  |           | 401.2871  | 384.2605  |
| 10 | 86.0964  | 1060.6037 | 1043.5772 | 1042.5932      | 1088.5986 | 1071.5721 | 1070.5881      | 1018.5568 |          | L    | 230.1248  | 229.1295  |           | 288.2030  | 271.1765  |
| 11 | 129.1135 |           |           |                |           |           |                |           |          | R    | 74.0237   | 73.0284   |           | 175.1190  | 158.0924  |

| Seq    | ya       | yb       | Seq    | ya       | yb       | Seq    | ya       | yb       |
|--------|----------|----------|--------|----------|----------|--------|----------|----------|
| VT     | 173.1285 | 201.1234 | VTK    | 301.2234 | 329.2183 | VTKG   | 358.2449 | 386.2398 |
| VTKGF  | 505.3133 | 533.3082 | VTKGFV | 604.3817 | 632.3766 | TK     | 202.1550 | 230.1499 |
| TKG    | 259.1765 | 287.1714 | TKGF   | 406.2449 | 434.2398 | TKGFV  | 505.3133 | 533.3082 |
| TKGFVD | 620.3402 | 648.3352 | KG     | 158.1288 | 186.1237 | KGF    | 305.1972 | 333.1921 |
| KGFV   | 404.2656 | 432.2605 | KGFVD  | 519.2926 | 547.2875 | KGFVDL | 632.3766 | 660.3715 |
| GF     | 177.1022 | 205.0972 | GFV    | 276.1707 | 304.1656 | GFVD   | 391.1976 | 419.1925 |
| GFVDL  | 504.2817 | 532.2766 | GFVDLL | 617.3657 | 645.3606 | FV     | 219.1492 | 247.1441 |
| FVD    | 334.1761 | 362.1710 | FVDL   | 447.2602 | 475.2551 | FVDLL  | 560.3443 | 588.3392 |
| VD     | 187.1077 | 215.1026 | VDL    | 300.1918 | 328.1867 | VDLL   | 413.2758 | 441.2708 |
| DL     | 201.1234 | 229.1183 | DLL    | 314.2074 | 342.2023 | LL     | 199.1805 | 227.1754 |

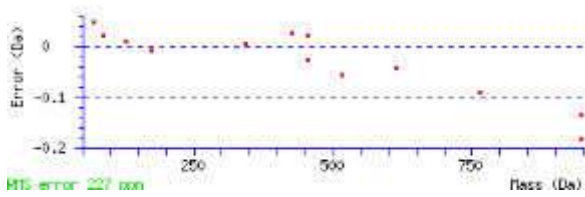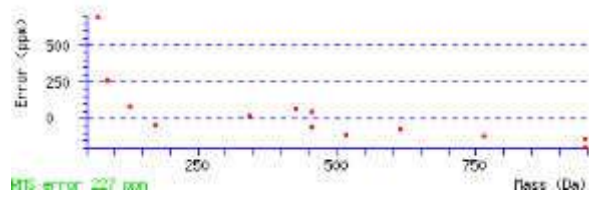

NCBI **BLAST** search of [DVTKGFVDLLR](#)

(Parameters: blastp, nr protein database, expect=20000, no filter, PAM30)

Other BLAST [web gateways](#)

**All matches to this query**

| Score | Mr(calc)  | Delta  | Sequence                     |
|-------|-----------|--------|------------------------------|
| 11.8  | 1261.6779 | 0.0296 | <a href="#">RIYDIEGQLR</a>   |
| 11.3  | 1261.6779 | 0.0296 | <a href="#">RLYDIEGQLR</a>   |
| 10.1  | 1261.6085 | 0.0989 | <a href="#">SQELECKVGGR</a>  |
| 9.5   | 1261.6449 | 0.0626 | <a href="#">RSPSSMTDLLR</a>  |
| 9.3   | 1261.6779 | 0.0295 | <a href="#">LRYVGVDDGLR</a>  |
| 8.8   | 1261.7030 | 0.0044 | <a href="#">IVQLYAESALR</a>  |
| 8.5   | 1261.6336 | 0.0738 | <a href="#">MLSSEPGVLTGR</a> |
| 8.3   | 1261.7030 | 0.0044 | <a href="#">DVTKGFVDLLR</a>  |
| 8.3   | 1261.6667 | 0.0408 | <a href="#">DVTOGFVDLLR</a>  |
| 8.3   | 1261.6084 | 0.0990 | <a href="#">MSEARLAAEER</a>  |

Mascot: <http://www.matrixscience.com/>

**MATRIX SCIENCE Mascot Search Results**

**Peptide View Spot no 132**

MS/MS Fragmentation of **TFQGPPHGIQVER**

Found in **gi328682245** in **NCBI nr**, ribulose-1,5-bisphosphate carboxylase/oxygenase large subunit [Pseudocephaloza lepidozoides]

Match to Query 340: 1464.765024 from(1465.772300,1+) intensity(0.0000) index(29)

Title: Label: J4, Spot\_Id: 219731, Peak\_List\_Id: 225364, MSMS Job\_Run\_Id: 21776, Comment:

Data file C:\Documents and Settings\Administrator\Desktop\farah BHU\spot set plate\Farah-Garima 11May 2013\ppw\_J4\_136842177300.txt

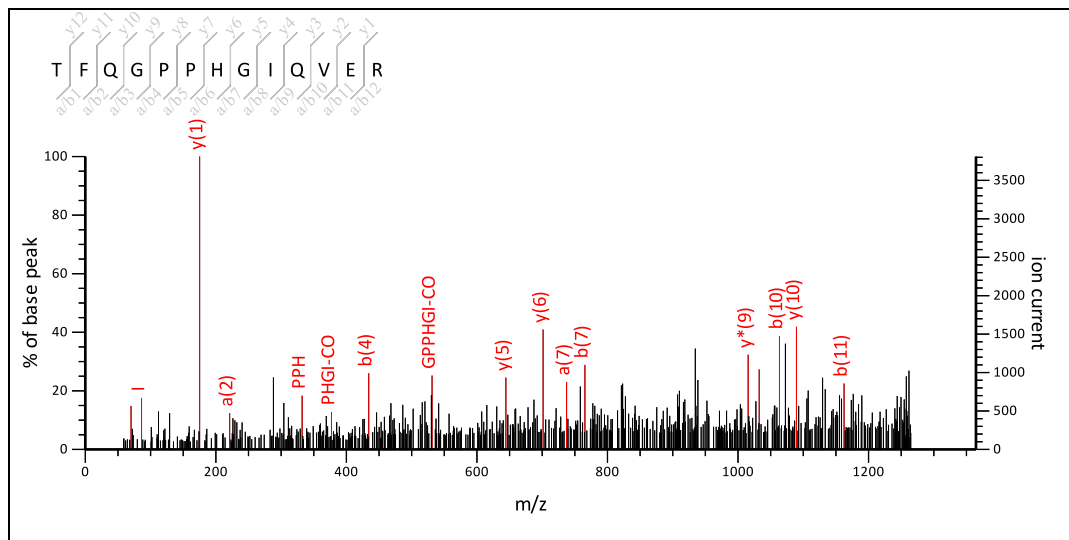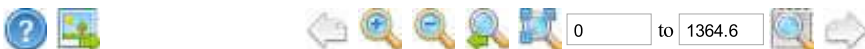

Label all possible matches  Label matches used for scoring

Monoisotopic mass of neutral peptide Mr(calc): 1464.7474

Fixed modifications: Carbamidomethyl (C) (apply to specified residues or termini only)

Ions Score: 41 Expect: 0.29

Matches : 22/229 fragment ions using 26 most intense peaks [\(help\)](#)

| #  | Immon.         | a               | a*              | a <sup>0</sup> | b                | b*        | b <sup>0</sup> | d         | d'       | Seq. | v         | w         | w'       | y                | y*               |
|----|----------------|-----------------|-----------------|----------------|------------------|-----------|----------------|-----------|----------|------|-----------|-----------|----------|------------------|------------------|
| 1  | 74.0600        | 74.0600         |                 | 56.0495        | 102.0550         |           | 84.0444        | 44.0495   |          | T    |           |           |          |                  |                  |
| 2  | 120.0808       | <b>221.1285</b> |                 | 203.1179       | 249.1234         |           | 231.1128       |           |          | F    | 1272.6444 |           |          | 1364.7070        | 1347.6804        |
| 3  | 101.0709       | 349.1870        | <b>332.1605</b> | 331.1765       | <b>377.1819</b>  | 360.1554  | 359.1714       | 292.1656  |          | Q    | 1144.5858 | 1143.5905 |          | 1217.6385        | 1200.6120        |
| 4  | 30.0338        | 406.2085        | 389.1819        | 388.1979       | <b>434.2034</b>  | 417.1769  | 416.1928       |           |          | G    |           |           |          | <b>1089.5800</b> | 1072.5534        |
| 5  | <b>70.0651</b> | 503.2613        | 486.2347        | 485.2507       | <b>531.2562</b>  | 514.2296  | 513.2456       | 477.2456  |          | P    | 990.5116  | 989.5163  |          | <b>1032.5585</b> | <b>1015.5320</b> |
| 6  | <b>70.0651</b> | 600.3140        | 583.2875        | 582.3035       | 628.3089         | 611.2824  | 610.2984       | 574.2984  |          | P    | 893.4588  | 892.4635  |          | 935.5057         | 918.4792         |
| 7  | 110.0713       | <b>737.3729</b> | 720.3464        | 719.3624       | <b>765.3679</b>  | 748.3413  | 747.3573       |           |          | H    | 756.3999  |           |          | 838.4530         | 821.4264         |
| 8  | 30.0338        | 794.3944        | 777.3679        | 776.3838       | 822.3893         | 805.3628  | 804.3787       |           |          | G    |           |           |          | <b>701.3941</b>  | 684.3675         |
| 9  | <b>86.0964</b> | 907.4785        | 890.4519        | 889.4679       | 935.4734         | 918.4468  | 917.4628       | 879.4472  | 893.4628 | I    | 586.2944  | 599.3148  | 613.3304 | <b>644.3726</b>  | 627.3461         |
| 10 | 101.0709       | 1035.5370       | 1018.5105       | 1017.5265      | <b>1063.5320</b> | 1046.5054 | 1045.5214      | 978.5156  |          | Q    | 458.2358  | 457.2405  |          | <b>531.2885</b>  | 514.2620         |
| 11 | 72.0808        | 1134.6055       | 1117.5789       | 1116.5949      | <b>1162.6004</b> | 1145.5738 | 1144.5898      | 1120.5898 |          | V    | 359.1674  | 372.1878  |          | 403.2300         | 386.2034         |
| 12 | 102.0550       | 1263.6480       | 1246.6215       | 1245.6375      | 1291.6430        | 1274.6164 | 1273.6324      | 1205.6426 |          | E    | 230.1248  | 229.1295  |          | 304.1615         | 287.1350         |
| 13 | 129.1135       |                 |                 |                |                  |           |                |           |          | R    | 74.0237   | 73.0284   |          | <b>175.1190</b>  | 158.0924         |

| Seq   | ya       | yb       | Seq    | ya              | yb              | Seq     | ya       | yb       |
|-------|----------|----------|--------|-----------------|-----------------|---------|----------|----------|
| FQ    | 248.1394 | 276.1343 | FQG    | 305.1608        | 333.1557        | FQGP    | 402.2136 | 430.2085 |
| FQGP  | 499.2663 | 527.2613 | FQPPH  | 636.3253        | 664.3202        | FQPPHG  | 693.3467 | 721.3416 |
| QG    | 158.0924 | 186.0873 | QGP    | 255.1452        | 283.1401        | QGPP    | 352.1979 | 380.1928 |
| QGPPH | 489.2568 | 517.2518 | QGPPHG | 546.2783        | 574.2732        | QGPPHGI | 659.3624 | 687.3573 |
| GP    | 127.0866 | 155.0815 | GPP    | 224.1394        | 252.1343        | GPPH    | 361.1983 | 389.1932 |
| GPPHG | 418.2197 | 446.2146 | GPPHGI | <b>531.3038</b> | 559.2987        | GPPHGIQ | 659.3624 | 687.3573 |
| PP    | 167.1179 | 195.1128 | PPH    | 304.1768        | <b>332.1717</b> | PPHG    | 361.1983 | 389.1932 |
| PPHGI | 474.2823 | 502.2772 | PPHGIQ | 602.3409        | 630.3358        | PH      | 207.1240 | 235.1190 |

|               |          |          |              |                 |          |               |          |          |
|---------------|----------|----------|--------------|-----------------|----------|---------------|----------|----------|
| <b>PHG</b>    | 264.1455 | 292.1404 | <b>PHGI</b>  | <b>377.2296</b> | 405.2245 | <b>PHGIQ</b>  | 505.2881 | 533.2831 |
| <b>PHGIQV</b> | 604.3566 | 632.3515 | <b>HG</b>    | 167.0927        | 195.0877 | <b>HGI</b>    | 280.1768 | 308.1717 |
| <b>HGIQ</b>   | 408.2354 | 436.2303 | <b>HGIQV</b> | 507.3038        | 535.2987 | <b>HGIQVE</b> | 636.3464 | 664.3413 |
| <b>GI</b>     | 143.1179 | 171.1128 | <b>GIQ</b>   | 271.1765        | 299.1714 | <b>GIQV</b>   | 370.2449 | 398.2398 |
| <b>GIQVE</b>  | 499.2875 | 527.2824 | <b>IQ</b>    | 214.1550        | 242.1499 | <b>IQV</b>    | 313.2234 | 341.2183 |
| <b>IQVE</b>   | 442.2660 | 470.2609 | <b>QV</b>    | 200.1394        | 228.1343 | <b>QVE</b>    | 329.1819 | 357.1769 |
| <b>VE</b>     | 201.1234 | 229.1183 |              |                 |          |               |          |          |

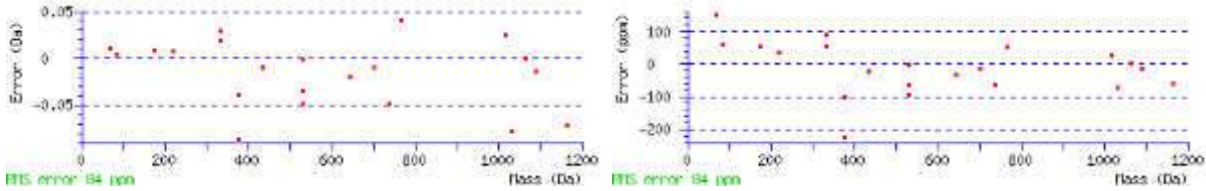

NCBI **BLAST** search of [TFQGPPHGIQVER](#)  
 (Parameters: blastp, nr protein database, expect=20000, no filter, PAM30)  
 Other BLAST [web gateways](#)

**All matches to this query**

| Score | Mr(calc)  | Delta   | Sequence                      |
|-------|-----------|---------|-------------------------------|
| 41.5  | 1464.7838 | -0.0187 | <a href="#">TFKGPPHGIQVER</a> |
| 41.5  | 1464.7838 | -0.0187 | <a href="#">TFKGPPHGIQVER</a> |
| 41.5  | 1464.7838 | -0.0187 | <a href="#">TFQGPPHGIKVER</a> |
| 41.5  | 1464.7838 | -0.0187 | <a href="#">TFQGPPHGIKVER</a> |
| 41.5  | 1464.7474 | 0.0176  | <a href="#">TFQGPPHGIQVER</a> |
| 41.5  | 1464.7474 | 0.0176  | <a href="#">TFQGPPHGIQVER</a> |
| 41.5  | 1464.7474 | 0.0176  | <a href="#">TFQGPPHGIQVER</a> |
| 41.5  | 1464.7474 | 0.0176  | <a href="#">TFQGPPHGIQVER</a> |
| 41.5  | 1464.7474 | 0.0176  | <a href="#">TFQGPPHGIQVER</a> |
| 41.5  | 1464.7474 | 0.0176  | <a href="#">TFQGPPHGIQVER</a> |

Mascot: <http://www.matrixscience.com/>



# Mascot Search Results

## Peptide View **Spot no 134**

MS/MS Fragmentation of **AVVELAVVAAAAAGYVVGLR**

Found in **gj178708842** in **NCBIInr**, IAP100, putative, expressed [Oryza sativa Japonica Group]

Match to Query 31: 1969.329924 from(1970.337200,1+) intensity(0.0000) index(11)

Title: Label: D6, Spot\_Id: 228925, Peak\_List\_Id: 257500, MSMS Job\_Run\_Id: 24922, Comment:

Data file ppw\_D6\_138985129300.txt

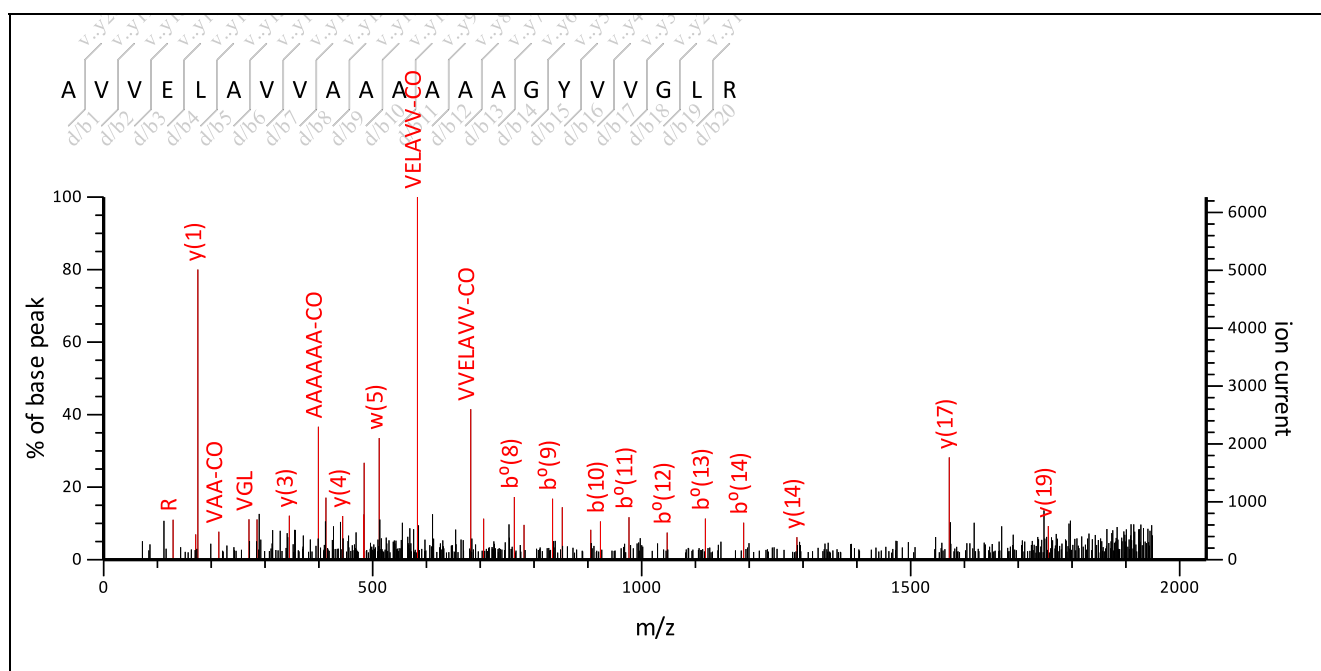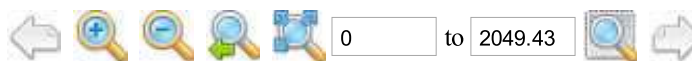

Label all possible matches  Label matches used for scoring

**Monoisotopic mass of neutral peptide Mr(calc):** 1969.1360

**Fixed modifications:** Carbamidomethyl (C) (apply to specified residues or termini only)

**Ions Score:** 81 **Expect:** 4.1e-07

**Matches:** 78/381 fragment ions using 57 most intense peaks ([help](#))

| #  | Immon.   | a               | a <sup>0</sup> | b               | b <sup>0</sup>  | d               | Seq. | v                | w         | y                | y*        | y <sup>0</sup> | #  |
|----|----------|-----------------|----------------|-----------------|-----------------|-----------------|------|------------------|-----------|------------------|-----------|----------------|----|
| 1  | 44.0495  | 44.0495         |                | 72.0444         |                 | 44.0495         | A    |                  |           |                  |           |                | 21 |
| 2  | 72.0808  | 143.1179        |                | <b>171.1128</b> |                 | <b>129.1022</b> | V    | 1855.0436        | 1868.0640 | 1899.1062        | 1882.0797 | 1881.0956      | 20 |
| 3  | 72.0808  | 242.1863        |                | <b>270.1812</b> |                 | 228.1707        | V    | <b>1755.9752</b> | 1768.9956 | 1800.0378        | 1783.0112 | 1782.0272      | 19 |
| 4  | 102.0550 | 371.2289        | 353.2183       | <b>399.2238</b> | 381.2132        | 313.2234        | E    | 1626.9326        | 1625.9374 | 1700.9694        | 1683.9428 | 1682.9588      | 18 |
| 5  | 86.0964  | <b>484.3130</b> | 466.3024       | <b>512.3079</b> | 494.2973        | 442.2660        | L    | 1513.8485        | 1512.8533 | <b>1571.9268</b> | 1554.9002 |                | 17 |
| 6  | 44.0495  | 555.3501        | 537.3395       | <b>583.3450</b> | 565.3344        |                 | A    | 1442.8114        |           | 1458.8427        | 1441.8162 |                | 16 |
| 7  | 72.0808  | 654.4185        | 636.4079       | <b>682.4134</b> | 664.4028        | 640.4028        | V    | 1343.7430        | 1356.7634 | 1387.8056        | 1370.7791 |                | 15 |
| 8  | 72.0808  | 753.4869        | 735.4763       | <b>781.4818</b> | <b>763.4713</b> | 739.4713        | V    | 1244.6746        | 1257.6950 | <b>1288.7372</b> | 1271.7106 |                | 14 |
| 9  | 44.0495  | 824.5240        | 806.5135       | <b>852.5189</b> | <b>834.5084</b> |                 | A    | 1173.6375        |           | <b>1189.6688</b> | 1172.6422 |                | 13 |
| 10 | 44.0495  | 895.5611        | 877.5506       | <b>923.5560</b> | <b>905.5455</b> |                 | A    | 1102.6004        |           | <b>1118.6317</b> | 1101.6051 |                | 12 |
| 11 | 44.0495  | 966.5982        | 948.5877       | 994.5932        | <b>976.5826</b> |                 | A    | 1031.5633        |           | <b>1047.5946</b> | 1030.5680 |                | 11 |



|    |          |           |           |           |           |           |   |          |          |          |          |  |    |
|----|----------|-----------|-----------|-----------|-----------|-----------|---|----------|----------|----------|----------|--|----|
| 12 | 44.0495  | 1037.6354 | 1019.6248 | 1065.6303 | 1047.6197 |           | A | 960.5261 |          | 976.5574 | 959.5309 |  | 10 |
| 13 | 44.0495  | 1108.6725 | 1090.6619 | 1136.6674 | 1118.6568 |           | A | 889.4890 |          | 905.5203 | 888.4938 |  | 9  |
| 14 | 44.0495  | 1179.7096 | 1161.6990 | 1207.7045 | 1189.6939 |           | A | 818.4519 |          | 834.4832 | 817.4567 |  | 8  |
| 15 | 30.0338  | 1236.7310 | 1218.7205 | 1264.7260 | 1246.7154 |           | G |          |          | 763.4461 | 746.4196 |  | 7  |
| 16 | 136.0757 | 1399.7944 | 1381.7838 | 1427.7893 | 1409.7787 |           | Y | 598.3671 |          | 706.4246 | 689.3981 |  | 6  |
| 17 | 72.0808  | 1498.8628 | 1480.8522 | 1526.8577 | 1508.8471 | 1484.8471 | V | 499.2987 | 512.3191 | 543.3613 | 526.3348 |  | 5  |
| 18 | 72.0808  | 1597.9312 | 1579.9206 | 1625.9261 | 1607.9156 | 1583.9156 | V | 400.2303 | 413.2507 | 444.2929 | 427.2663 |  | 4  |
| 19 | 30.0338  | 1654.9527 | 1636.9421 | 1682.9476 | 1664.9370 |           | G |          |          | 345.2245 | 328.1979 |  | 3  |
| 20 | 86.0964  | 1768.0367 | 1750.0262 | 1796.0316 | 1778.0211 | 1725.9898 | L | 230.1248 | 229.1295 | 288.2030 | 271.1765 |  | 2  |
| 21 | 129.1135 |           |           |           |           |           | R | 74.0237  | 73.0284  | 175.1190 | 158.0924 |  | 1  |

| Seq      | ya       | yb       | Seq      | ya       | yb       | Seq       | ya       | yb       |
|----------|----------|----------|----------|----------|----------|-----------|----------|----------|
| VV       | 171.1492 | 199.1441 | VVE      | 300.1918 | 328.1867 | VVEL      | 413.2758 | 441.2708 |
| VVELA    | 484.3130 | 512.3079 | VVELAV   | 583.3814 | 611.3763 | VVELAVV   | 682.4498 | 710.4447 |
| VE       | 201.1234 | 229.1183 | VEL      | 314.2074 | 342.2023 | VELA      | 385.2445 | 413.2395 |
| VELAV    | 484.3130 | 512.3079 | VELAVV   | 583.3814 | 611.3763 | VELAVVA   | 654.4185 | 682.4134 |
| EL       | 215.1390 | 243.1339 | ELA      | 286.1761 | 314.1710 | ELAV      | 385.2445 | 413.2395 |
| ELAVV    | 484.3130 | 512.3079 | ELAVVA   | 555.3501 | 583.3450 | ELAVVAA   | 626.3872 | 654.3821 |
| ELAVVAAA | 697.4243 | 725.4192 | LA       | 157.1335 | 185.1285 | LAV       | 256.2020 | 284.1969 |
| LAVV     | 355.2704 | 383.2653 | LAVVA    | 426.3075 | 454.3024 | LAVVAA    | 497.3446 | 525.3395 |
| LAVVAAA  | 568.3817 | 596.3766 | LAVVAAA  | 639.4188 | 667.4137 | AV        | 143.1179 | 171.1128 |
| AVV      | 242.1863 | 270.1812 | AVVA     | 313.2234 | 341.2183 | AVVAA     | 384.2605 | 412.2554 |
| AVVAAA   | 455.2976 | 483.2926 | AVVAAA   | 526.3348 | 554.3297 | AVVAAAA   | 597.3719 | 625.3668 |
| AVVAAAAA | 668.4090 | 696.4039 | VV       | 171.1492 | 199.1441 | VVA       | 242.1863 | 270.1812 |
| VVAA     | 313.2234 | 341.2183 | VVAAA    | 384.2605 | 412.2554 | VVAAAA    | 455.2976 | 483.2926 |
| VVAAAAA  | 526.3348 | 554.3297 | VVAAAAA  | 597.3719 | 625.3668 | VVAAAAAAG | 654.3933 | 682.3883 |
| VA       | 143.1179 | 171.1128 | VAA      | 214.1550 | 242.1499 | VAAA      | 285.1921 | 313.1870 |
| VAAA     | 356.2292 | 384.2241 | VAAAA    | 427.2663 | 455.2613 | VAAAAA    | 498.3035 | 526.2984 |
| VAAAAAAG | 555.3249 | 583.3198 | AA       | 115.0866 | 143.0815 | AAA       | 186.1237 | 214.1186 |
| AAAA     | 257.1608 | 285.1557 | AAAAA    | 328.1979 | 356.1928 | AAAAA     | 399.2350 | 427.2300 |
| AAAAAAG  | 456.2565 | 484.2514 | AAAAAAGY | 619.3198 | 647.3148 | AA        | 115.0866 | 143.0815 |
| AAA      | 186.1237 | 214.1186 | AAAA     | 257.1608 | 285.1557 | AAAAA     | 328.1979 | 356.1928 |
| AAAAAG   | 385.2194 | 413.2143 | AAAAAGY  | 548.2827 | 576.2776 | AAAAAGYV  | 647.3511 | 675.3461 |
| AA       | 115.0866 | 143.0815 | AAA      | 186.1237 | 214.1186 | AAAA      | 257.1608 | 285.1557 |
| AAAAG    | 314.1823 | 342.1772 | AAAAGY   | 477.2456 | 505.2405 | AAAAGYV   | 576.3140 | 604.3089 |
| AAAAGYVV | 675.3824 | 703.3774 | AA       | 115.0866 | 143.0815 | AAA       | 186.1237 | 214.1186 |
| AAAG     | 243.1452 | 271.1401 | AAAGY    | 406.2085 | 434.2034 | AAAGYV    | 505.2769 | 533.2718 |
| AAAGYVV  | 604.3453 | 632.3402 | AAAGYVVG | 661.3668 | 689.3617 | AA        | 115.0866 | 143.0815 |
| AAG      | 172.1081 | 200.1030 | AAGY     | 335.1714 | 363.1663 | AAGYV     | 434.2398 | 462.2347 |
| AAGYVV   | 533.3082 | 561.3031 | AAGYVVG  | 590.3297 | 618.3246 | AG        | 101.0709 | 129.0659 |
| AGY      | 264.1343 | 292.1292 | AGYV     | 363.2027 | 391.1976 | AGYVV     | 462.2711 | 490.2660 |
| AGYVVG   | 519.2926 | 547.2875 | AGYVVGL  | 632.3766 | 660.3715 | GY        | 193.0972 | 221.0921 |
| GYV      | 292.1656 | 320.1605 | GYVV     | 391.2340 | 419.2289 | GYVVG     | 448.2554 | 476.2504 |
| GYVVGL   | 561.3395 | 589.3344 | YV       | 235.1441 | 263.1390 | YVV       | 334.2125 | 362.2074 |
| YVVG     | 391.2340 | 419.2289 | YVVGL    | 504.3180 | 532.3130 | VV        | 171.1492 | 199.1441 |

|     |          |          |      |          |          |    |          |          |
|-----|----------|----------|------|----------|----------|----|----------|----------|
| VVG | 228.1707 | 256.1656 | VVGL | 341.2547 | 369.2496 | VG | 129.1022 | 157.0972 |
| VGL | 242.1863 | 270.1812 | GL   | 143.1179 | 171.1128 |    |          |          |

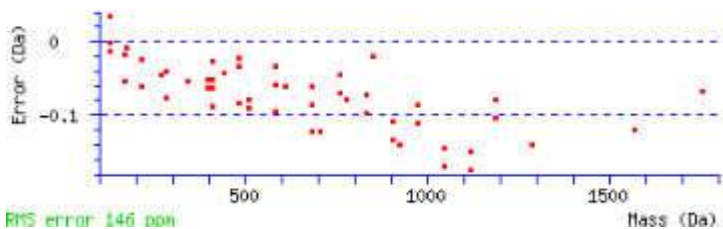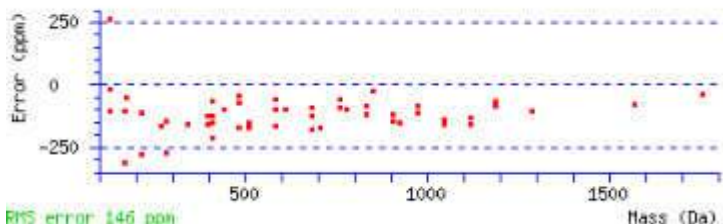

NCBI **BLAST** search of [AVVELAVVAAAAAAGYVVGLR](#)  
 (Parameters: blastp, nr protein database, expect=20000, no filter, PAM30)  
 Other BLAST [web gateways](#)

#### All matches to this query

| Score | Mr(calc)  | Delta  | Sequence                              |
|-------|-----------|--------|---------------------------------------|
| 81.2  | 1969.1360 | 0.1939 | <a href="#">AVVELAVVAAAAAAGYVVGLR</a> |
| 10.8  | 1969.1724 | 0.1575 | <a href="#">QLLILSLAINKFSGSIPR</a>    |
| 8.4   | 1969.1645 | 0.1654 | <a href="#">LLAELLOMQOTILAKK</a>      |
| 8.2   | 1969.1585 | 0.1714 | <a href="#">VGLIAVNDGILLRNHIPR</a>    |
| 7.8   | 1969.2088 | 0.1211 | <a href="#">LPSERIIPLVPSLVAPLR</a>    |
| 5.4   | 1969.2339 | 0.0960 | <a href="#">LLLLSAAAASAFLLLLTLR</a>   |
| 4.2   | 1969.1724 | 0.1575 | <a href="#">VLIVERVIEFLGLQSVR</a>     |
| 4.2   | 1969.1472 | 0.1827 | <a href="#">VLSERVPAEVLA AHPLLR</a>   |
| 4.0   | 1969.1459 | 0.1840 | <a href="#">DLVALTNEALLISITQKK</a>    |
| 2.5   | 1969.1612 | 0.1687 | <a href="#">LDFDIVIIGAGIIGLTIAR</a>   |

Mascot: <http://www.matrixscience.com/>


**Mascot Search Results**
**Peptide View**    **Spot no 134**

 MS/MS Fragmentation of **FVFLIHPGYEDLEGTEVEETIIK**

 Found in **gi78708842** in **NCBIInr**, IAP100, putative, expressed [Oryza sativa Japonica Group]

Match to Query 37: 2635.513724 from(2636.521000,1+) intensity(0.0000) index(14)

Title: Label: D6, Spot\_Id: 228925, Peak\_List\_Id: 257508, MSMS Job\_Run\_Id: 24922, Comment:

Data file ppw\_D6\_138985129300.txt

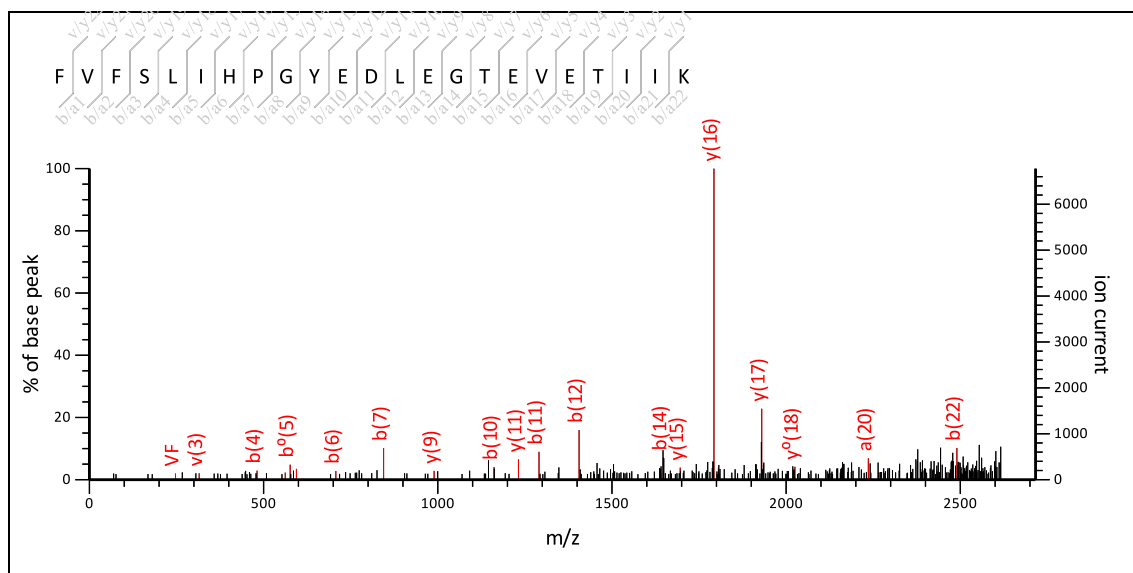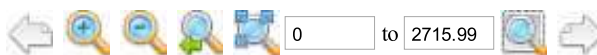
 Label all possible matches     Label matches used for scoring 

 Monoisotopic mass of neutral peptide **Mr(calc)**: 2635.3421

Fixed modifications: Carbamidomethyl (C) (apply to specified residues or termini only)

Ions Score: 34    Expect: 0.38

 Matches : 21/410 fragment ions using 52 most intense peaks ([help](#))

| #  | Immon.   | a         | a <sup>0</sup> | b         | b <sup>0</sup> | d         | d'        | Seq. | v         | w         | w'        | y         | y*        | y <sup>0</sup> | #  |
|----|----------|-----------|----------------|-----------|----------------|-----------|-----------|------|-----------|-----------|-----------|-----------|-----------|----------------|----|
| 1  | 120.0808 | 120.0808  |                | 148.0757  |                | 44.0495   |           | F    |           |           |           |           |           |                | 23 |
| 2  | 72.0808  | 219.1492  |                | 247.1441  |                | 205.1335  |           | V    | 2445.2184 | 2458.2388 |           | 2489.2810 | 2472.2545 | 2471.2704      | 22 |
| 3  | 120.0808 | 366.2176  |                | 394.2125  |                |           |           | F    | 2298.1500 |           |           | 2390.2126 | 2373.1860 | 2372.2020      | 21 |
| 4  | 60.0444  | 453.2496  | 435.2391       | 481.2445  | 463.2340       | 437.2547  |           | S    | 2211.1180 | 2210.1227 |           | 2243.1442 | 2226.1176 | 2225.1336      | 20 |
| 5  | 86.0964  | 566.3337  | 548.3231       | 594.3286  | 576.3180       | 524.2867  |           | L    | 2098.0339 | 2097.0386 |           | 2156.1121 | 2139.0856 | 2138.1016      | 19 |
| 6  | 86.0964  | 679.4178  | 661.4072       | 707.4127  | 689.4021       | 651.3865  | 665.4021  | I    | 1984.9498 | 1997.9702 | 2011.9859 | 2043.0281 | 2026.0015 | 2025.0175      | 18 |
| 7  | 110.0713 | 816.4767  | 798.4661       | 844.4716  | 826.4610       |           |           | H    | 1847.8909 |           |           | 1929.9440 | 1912.9175 | 1911.9335      | 17 |
| 8  | 70.0651  | 913.5294  | 895.5189       | 941.5244  | 923.5138       | 887.5138  |           | P    | 1750.8382 | 1749.8429 |           | 1792.8851 | 1775.8586 | 1774.8745      | 16 |
| 9  | 30.0338  | 970.5509  | 952.5403       | 998.5458  | 980.5352       |           |           | G    |           |           |           | 1695.8323 | 1678.8058 | 1677.8218      | 15 |
| 10 | 136.0757 | 1133.6142 | 1115.6037      | 1161.6091 | 1143.5986      |           |           | Y    | 1530.7534 |           |           | 1638.8109 | 1621.7843 | 1620.8003      | 14 |
| 11 | 102.0550 | 1262.6568 | 1244.6463      | 1290.6517 | 1272.6412      | 1204.6513 |           | E    | 1401.7108 | 1400.7155 |           | 1475.7475 | 1458.7210 | 1457.7370      | 13 |
| 12 | 88.0393  | 1377.6838 | 1359.6732      | 1405.6787 | 1387.6681      | 1333.6939 |           | D    | 1286.6838 | 1285.6886 |           | 1346.7050 | 1329.6784 | 1328.6944      | 12 |
| 13 | 86.0964  | 1490.7678 | 1472.7573      | 1518.7627 | 1500.7522      | 1448.7209 |           | L    | 1173.5998 | 1172.6045 |           | 1231.6780 | 1214.6515 | 1213.6674      | 11 |
| 14 | 102.0550 | 1619.8104 | 1601.7999      | 1647.8053 | 1629.7948      | 1561.8049 |           | E    | 1044.5572 | 1043.5619 |           | 1118.5939 | 1101.5674 | 1100.5834      | 10 |
| 15 | 30.0338  | 1676.8319 | 1658.8213      | 1704.8268 | 1686.8162      |           |           | G    |           |           |           | 989.5514  | 972.5248  | 971.5408       | 9  |
| 16 | 74.0600  | 1777.8796 | 1759.8690      | 1805.8745 | 1787.8639      | 1761.8846 | 1763.8639 | T    | 886.4880  | 899.5084  | 901.4877  | 932.5299  | 915.5033  | 914.5193       | 8  |
| 17 | 102.0550 | 1906.9222 | 1888.9116      | 1934.9171 | 1916.9065      | 1848.9167 |           | E    | 757.4454  | 756.4502  |           | 831.4822  | 814.4557  | 813.4716       | 7  |
| 18 | 72.0808  | 2005.9906 | 1987.9800      | 2033.9855 | 2015.9749      | 1991.9749 |           | V    | 658.3770  | 671.3974  |           | 702.4396  | 685.4131  | 684.4291       | 6  |
| 19 | 102.0550 | 2135.0332 | 2117.0226      | 2163.0281 | 2145.0175      | 2077.0277 |           | E    | 529.3344  | 528.3392  |           | 603.3712  | 586.3447  | 585.3606       | 5  |

|    |          |           |           |           |           |           |           |   |          |          |          |          |          |          |   |
|----|----------|-----------|-----------|-----------|-----------|-----------|-----------|---|----------|----------|----------|----------|----------|----------|---|
| 20 | 74.0600  | 2236.0808 | 2218.0703 | 2264.0758 | 2246.0652 | 2220.0859 | 2222.0652 | T | 428.2867 | 441.3071 | 443.2864 | 474.3286 | 457.3021 | 456.3180 | 4 |
| 21 | 86.0964  | 2349.1649 | 2331.1543 | 2377.1598 | 2359.1493 | 2321.1336 | 2335.1493 | I | 315.2027 | 328.2231 | 342.2387 | 373.2809 | 356.2544 |          | 3 |
| 22 | 86.0964  | 2462.2490 | 2444.2384 | 2490.2439 | 2472.2333 | 2434.2177 | 2448.2333 | I | 202.1186 | 215.1390 | 229.1547 | 260.1969 | 243.1703 |          | 2 |
| 23 | 101.1073 |           |           |           |           |           |           | K | 74.0237  | 73.0284  |          | 147.1128 | 130.0863 |          | 1 |

| Seq    | ya       | yb       | Seq    | ya       | yb       | Seq    | ya       | yb       |
|--------|----------|----------|--------|----------|----------|--------|----------|----------|
| VF     | 219.1492 | 247.1441 | VFS    | 306.1812 | 334.1761 | VFSL   | 419.2653 | 447.2602 |
| VFSLI  | 532.3493 | 560.3443 | VFSLIH | 669.4083 | 697.4032 | FS     | 207.1128 | 235.1077 |
| FSL    | 320.1969 | 348.1918 | FSLI   | 433.2809 | 461.2758 | FSLIH  | 570.3398 | 598.3348 |
| FSLIHP | 667.3926 | 695.3875 | SL     | 173.1285 | 201.1234 | SLI    | 286.2125 | 314.2074 |
| SLIH   | 423.2714 | 451.2663 | SLIHP  | 520.3242 | 548.3191 | SLIHPG | 577.3457 | 605.3406 |
| LI     | 199.1805 | 227.1754 | LIH    | 336.2394 | 364.2343 | LIHP   | 433.2922 | 461.2871 |
| LIHPG  | 490.3136 | 518.3085 | LIHPGY | 653.3770 | 681.3719 | IH     | 223.1553 | 251.1503 |
| IHP    | 320.2081 | 348.2030 | IHPG   | 377.2296 | 405.2245 | IHPGY  | 540.2929 | 568.2878 |
| IHPGYE | 669.3355 | 697.3304 | HP     | 207.1240 | 235.1190 | HPG    | 264.1455 | 292.1404 |
| HPGY   | 427.2088 | 455.2037 | HPGYE  | 556.2514 | 584.2463 | HPGYED | 671.2784 | 699.2733 |
| PG     | 127.0866 | 155.0815 | PGY    | 290.1499 | 318.1448 | PGYE   | 419.1925 | 447.1874 |
| PGYED  | 534.2195 | 562.2144 | PGYEDL | 647.3035 | 675.2984 | GY     | 193.0972 | 221.0921 |
| GYE    | 322.1397 | 350.1347 | GYED   | 437.1667 | 465.1616 | GYEDL  | 550.2508 | 578.2457 |
| GYEDLE | 679.2933 | 707.2883 | YE     | 265.1183 | 293.1132 | YED    | 380.1452 | 408.1401 |
| YEDL   | 493.2293 | 521.2242 | YEDLE  | 622.2719 | 650.2668 | YEDLEG | 679.2933 | 707.2883 |
| ED     | 217.0819 | 245.0768 | EDL    | 330.1660 | 358.1609 | EDLE   | 459.2086 | 487.2035 |
| EDLEG  | 516.2300 | 544.2249 | EDLEGT | 617.2777 | 645.2726 | DL     | 201.1234 | 229.1183 |
| DLE    | 330.1660 | 358.1609 | DLEG   | 387.1874 | 415.1823 | DLEGT  | 488.2351 | 516.2300 |
| DLEGTE | 617.2777 | 645.2726 | LE     | 215.1390 | 243.1339 | LEG    | 272.1605 | 300.1554 |
| LEGT   | 373.2082 | 401.2031 | LEGTE  | 502.2508 | 530.2457 | LEGTEV | 601.3192 | 629.3141 |
| EG     | 159.0764 | 187.0713 | EGT    | 260.1241 | 288.1190 | EGTE   | 389.1667 | 417.1616 |
| EGTEV  | 488.2351 | 516.2300 | EGTEVE | 617.2777 | 645.2726 | GT     | 131.0815 | 159.0764 |
| GTE    | 260.1241 | 288.1190 | GTEV   | 359.1925 | 387.1874 | GTEVE  | 488.2351 | 516.2300 |
| GTEVET | 589.2828 | 617.2777 | TE     | 203.1026 | 231.0975 | TEV    | 302.1710 | 330.1660 |
| TEVE   | 431.2136 | 459.2086 | TEVET  | 532.2613 | 560.2562 | TEVETI | 645.3454 | 673.3403 |
| EV     | 201.1234 | 229.1183 | EVE    | 330.1660 | 358.1609 | EVET   | 431.2136 | 459.2086 |
| EVETI  | 544.2977 | 572.2926 | EVETII | 657.3818 | 685.3767 | VE     | 201.1234 | 229.1183 |
| VET    | 302.1710 | 330.1660 | VETI   | 415.2551 | 443.2500 | VETII  | 528.3392 | 556.3341 |
| ET     | 203.1026 | 231.0975 | ETI    | 316.1867 | 344.1816 | ETII   | 429.2708 | 457.2657 |
| TI     | 187.1441 | 215.1390 | TII    | 300.2282 | 328.2231 | II     | 199.1805 | 227.1754 |

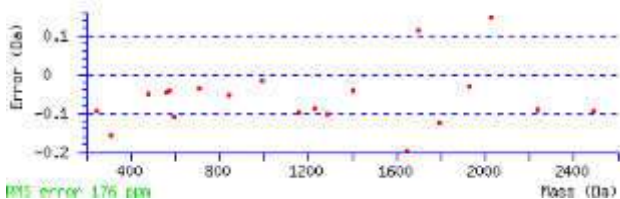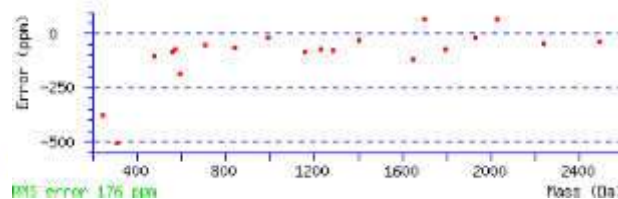

NCBI BLAST search of [FVFSLIHPGYEDLEGTEVETIIK](#)

(Parameters: blastp, nr protein database, expect=20000, no filter, PAM30)

Other BLAST [web gateways](#)

#### All matches to this query

| Score | Mr(calc)  | Delta  | Sequence                                  |
|-------|-----------|--------|-------------------------------------------|
| 33.9  | 2635.3421 | 0.1716 | <a href="#">FVFSLIHPGYEDLEGTEVETIIK</a>   |
| 1.5   | 2635.2878 | 0.2259 | <a href="#">ENSKITVTGTVTGGSEGSSHVOWEK</a> |
| 0.9   | 2635.2828 | 0.2309 | <a href="#">KGFIMNHHPLPTYDFHSYMR</a>      |
| 0.9   | 2635.2700 | 0.2437 | <a href="#">KYGLAADNVIDAYLVDANGMVHDR</a>  |

**Mascot:** <http://www.matrixscience.com/>

**MATRIX SCIENCE Mascot Search Results**

**Peptide View Spot no 134**

MS/MS Fragmentation of **SILSFNGMLTVLSNFPGEER**

Found in **gi78708842** in **NCBIInr**, IAP100, putative, expressed [Oryza sativa Japonica Group]

Match to Query 33: 2226.272224 from(2227.279500,1+) intensity(0.0000) index(12)  
 Title: Label: D6, Spot\_Id: 228925, Peak\_List\_Id: 257512, MSMS Job\_Run\_Id: 24922, Comment:  
 Data file ppw\_D6\_138985129300.txt

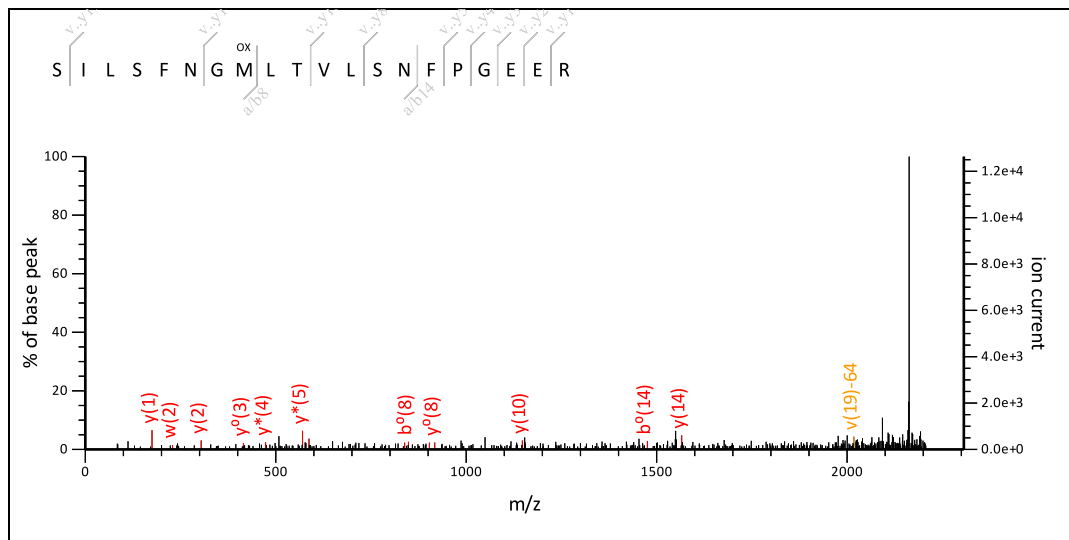

Navigation icons: Home, Back, Forward, Search, and a range input field from 0 to 2306.52.

Label all possible matches  Label matches used for scoring

**Monoisotopic mass of neutral peptide Mr(calc):** 2226.0991  
**Fixed modifications:** Carbamidomethyl (C) (apply to specified residues or termini only)  
**Variable modifications:**  
**M8** : Oxidation (M), with neutral losses 0.0000 (shown in table), 63.9983  
**Ions Score:** 10 **Expect:** 1.2e+02  
**Matches** : 16/538 fragment ions using 44 most intense peaks ([help](#))

| #  | Immon.   | a         | a*        | a <sup>0</sup> | b         | b*        | b <sup>0</sup> | d         | d'        | Seq. | v         | w         | w'        | y         | y*        |
|----|----------|-----------|-----------|----------------|-----------|-----------|----------------|-----------|-----------|------|-----------|-----------|-----------|-----------|-----------|
| 1  | 60.0444  | 60.0444   |           | 42.0338        | 88.0393   |           | 70.0287        | 44.0495   |           | S    |           |           |           |           |           |
| 2  | 86.0964  | 173.1285  |           | 155.1179       | 201.1234  |           | 183.1128       | 145.0972  | 159.1128  | I    | 2081.9961 | 2095.0165 | 2109.0321 | 2140.0743 | 2123.0478 |
| 3  | 86.0964  | 286.2125  |           | 268.2020       | 314.2074  |           | 296.1969       | 244.1656  |           | L    | 1968.9120 | 1967.9168 |           | 2026.9903 | 2009.9637 |
| 4  | 60.0444  | 373.2445  |           | 355.2340       | 401.2395  |           | 383.2289       | 357.2496  |           | S    | 1881.8800 | 1880.8847 |           | 1913.9062 | 1896.8796 |
| 5  | 120.0808 | 520.3130  |           | 502.3024       | 548.3079  |           | 530.2973       |           |           | F    | 1734.8116 |           |           | 1826.8742 | 1809.8476 |
| 6  | 87.0553  | 634.3559  | 617.3293  | 616.3453       | 662.3508  | 645.3243  | 644.3402       | 591.3501  |           | N    | 1620.7686 | 1619.7734 |           | 1679.8057 | 1662.7792 |
| 7  | 30.0338  | 691.3773  | 674.3508  | 673.3668       | 719.3723  | 702.3457  | 701.3617       |           |           | G    |           |           |           | 1565.7628 | 1548.7363 |
| 8  | 120.0478 | 838.4127  | 821.3862  | 820.4022       | 866.4077  | 849.3811  | 848.3971       | 762.4145  |           | M    | 1416.7118 | 1415.7165 |           | 1508.7414 | 1491.7148 |
| 9  | 86.0964  | 951.4968  | 934.4703  | 933.4862       | 979.4917  | 962.4652  | 961.4812       | 909.4499  |           | L    | 1303.6277 | 1302.6325 |           | 1361.7060 | 1344.6794 |
| 10 | 74.0600  | 1052.5445 | 1035.5179 | 1034.5339      | 1080.5394 | 1063.5129 | 1062.5288      | 1036.5496 | 1038.5288 | T    | 1202.5800 | 1215.6004 | 1217.5797 | 1248.6219 | 1231.5953 |
| 11 | 72.0808  | 1151.6129 | 1134.5864 | 1133.6023      | 1179.6078 | 1162.5813 | 1161.5973      | 1137.5973 |           | V    | 1103.5116 | 1116.5320 |           | 1147.5742 | 1130.5477 |
| 12 | 86.0964  | 1264.6970 | 1247.6704 | 1246.6864      | 1292.6919 | 1275.6653 | 1274.6813      | 1222.6500 |           | L    | 990.4275  | 989.4323  |           | 1048.5058 | 1031.4793 |
| 13 | 60.0444  | 1351.7290 | 1334.7024 | 1333.7184      | 1379.7239 | 1362.6974 | 1361.7133      | 1335.7341 |           | S    | 903.3955  | 902.4003  |           | 935.4217  | 918.3952  |
| 14 | 87.0553  | 1465.7719 | 1448.7454 | 1447.7614      | 1493.7668 | 1476.7403 | 1475.7563      | 1422.7661 |           | N    | 789.3526  | 788.3573  |           | 848.3897  | 831.3632  |
| 15 | 120.0808 | 1612.8403 | 1595.8138 | 1594.8298      | 1640.8353 | 1623.8087 | 1622.8247      |           |           | F    | 642.2842  |           |           | 734.3468  | 717.3202  |
| 16 | 70.0651  | 1709.8931 | 1692.8666 | 1691.8825      | 1737.8880 | 1720.8615 | 1719.8775      | 1683.8775 |           | P    | 545.2314  | 544.2362  |           | 587.2784  | 570.2518  |
| 17 | 30.0338  | 1766.9146 | 1749.8880 | 1748.9040      | 1794.9095 | 1777.8829 | 1776.8989      |           |           | G    |           |           |           | 490.2256  | 473.1991  |
| 18 | 102.0550 | 1895.9572 | 1878.9306 | 1877.9466      | 1923.9521 | 1906.9255 | 1905.9415      | 1837.9517 |           | E    | 359.1674  | 358.1721  |           | 433.2041  | 416.1776  |
| 19 | 102.0550 | 2024.9998 | 2007.9732 | 2006.9892      | 2052.9947 | 2035.9681 | 2034.9841      | 1966.9943 |           | E    | 230.1248  | 229.1295  |           | 304.1615  | 287.1350  |
| 20 | 129.1135 |           |           |                |           |           |                |           |           | R    | 74.0237   | 73.0284   |           | 175.1190  | 158.0924  |



| Seq     | ya       | yb       | Seq    | ya       | yb       | Seq    | ya       | yb       |
|---------|----------|----------|--------|----------|----------|--------|----------|----------|
| IL      | 199.1805 | 227.1754 | ILS    | 286.2125 | 314.2074 | ILSF   | 433.2809 | 461.2758 |
| ILSFN   | 547.3239 | 575.3188 | ILSFNG | 604.3453 | 632.3402 | LS     | 173.1285 | 201.1234 |
| LSF     | 320.1969 | 348.1918 | LSFN   | 434.2398 | 462.2347 | LSFNG  | 491.2613 | 519.2562 |
| LSFNGM  | 638.2967 | 666.2916 | SF     | 207.1128 | 235.1077 | SFN    | 321.1557 | 349.1506 |
| SFNG    | 378.1772 | 406.1721 | SFNGM  | 525.2126 | 553.2075 | SFNGML | 638.2967 | 666.2916 |
| FN      | 234.1237 | 262.1186 | FNG    | 291.1452 | 319.1401 | FNGM   | 438.1806 | 466.1755 |
| FNGML   | 551.2646 | 579.2595 | FNGMLT | 652.3123 | 680.3072 | NG     | 144.0768 | 172.0717 |
| NGM     | 291.1122 | 319.1071 | NGML   | 404.1962 | 432.1911 | NGMLT  | 505.2439 | 533.2388 |
| NGMLTV  | 604.3123 | 632.3072 | GM     | 177.0692 | 205.0641 | GML    | 290.1533 | 318.1482 |
| GMLT    | 391.2010 | 419.1959 | GMLTV  | 490.2694 | 518.2643 | GMLTVL | 603.3534 | 631.3484 |
| GMLTVLS | 690.3855 | 718.3804 | ML     | 233.1318 | 261.1267 | MLT    | 334.1795 | 362.1744 |
| MLTV    | 433.2479 | 461.2428 | MLTVL  | 546.3320 | 574.3269 | MLTVLS | 633.3640 | 661.3589 |
| LT      | 187.1441 | 215.1390 | LTV    | 286.2125 | 314.2074 | LTVL   | 399.2966 | 427.2915 |
| LTVLS   | 486.3286 | 514.3235 | LTVLSN | 600.3715 | 628.3665 | TV     | 173.1285 | 201.1234 |
| TVL     | 286.2125 | 314.2074 | TVLS   | 373.2445 | 401.2395 | TVLSN  | 487.2875 | 515.2824 |
| TVLSNF  | 634.3559 | 662.3508 | VL     | 185.1648 | 213.1598 | VLS    | 272.1969 | 300.1918 |
| VLSN    | 386.2398 | 414.2347 | VLSNF  | 533.3082 | 561.3031 | VLSNFP | 630.3610 | 658.3559 |
| VLSNFPG | 687.3824 | 715.3774 | LS     | 173.1285 | 201.1234 | LSN    | 287.1714 | 315.1663 |
| LSNF    | 434.2398 | 462.2347 | LSNFP  | 531.2926 | 559.2875 | LSNFPG | 588.3140 | 616.3089 |
| SN      | 174.0873 | 202.0822 | SNF    | 321.1557 | 349.1506 | SNFP   | 418.2085 | 446.2034 |
| SNFPG   | 475.2300 | 503.2249 | SNFPGE | 604.2726 | 632.2675 | NF     | 234.1237 | 262.1186 |
| NFP     | 331.1765 | 359.1714 | NFPG   | 388.1979 | 416.1928 | NFPGE  | 517.2405 | 545.2354 |
| NFPGEE  | 646.2831 | 674.2780 | FP     | 217.1335 | 245.1285 | FPG    | 274.1550 | 302.1499 |
| FPGE    | 403.1976 | 431.1925 | FPGEE  | 532.2402 | 560.2351 | PG     | 127.0866 | 155.0815 |
| PGE     | 256.1292 | 284.1241 | PGEE   | 385.1718 | 413.1667 | GE     | 159.0764 | 187.0713 |
| GEE     | 288.1190 | 316.1139 | EE     | 231.0975 | 259.0925 |        |          |          |

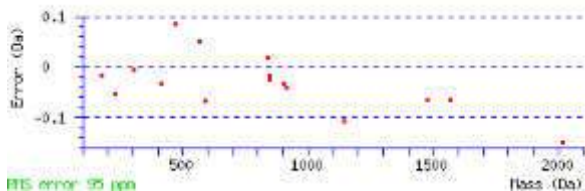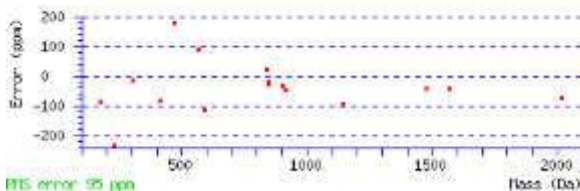

NCBI BLAST search of [SILSFNGMLTVLSNFPGEER](#)  
 (Parameters: blastp, nr protein database, expect=20000, no filter, PAM30)  
 Other BLAST [web gateways](#)

All matches to this query

| Score | M <sub>r</sub> (calc) | Delta  | Sequence                                |
|-------|-----------------------|--------|-----------------------------------------|
| 9.9   | 2226.0991             | 0.1732 | <a href="#">SILSFNGMLTVLSNFPGEER</a>    |
| 4.1   | 2226.0521             | 0.2201 | <a href="#">FROLVVENAGTICGGMSSER</a>    |
| 2.8   | 2226.0661             | 0.2061 | <a href="#">GTGITANVVAPGSTGTPMMYTGK</a> |
| 2.8   | 2226.0661             | 0.2061 | <a href="#">GTGITANVVAPGSTGTPMMYTGK</a> |
| 0.9   | 2226.1644             | 0.1078 | <a href="#">GAEGWNLLKVLETVAEEAER</a>    |
| 0.2   | 2226.0600             | 0.2122 | <a href="#">GVGGGGLOPOFVDHRAAMEER</a>   |

Mascot: <http://www.matrixscience.com/>





# Mascot Search Results

## Peptide View **Spot no 136**

MS/MS Fragmentation of **IIGGGLPVGAYGGR**

Found in **gi|255571784** in **NCBIInr**, glutamate-1-semialdehyde 2,1-aminomutase, putative [*Ricinus communis*]

Match to Query 129: 1285.712124 from(1286.719400,1+) intensity(0.0000) index(14)

Title: Label: E3, Spot\_Id: 219710, Peak\_List\_Id: 225248, MSMS Job\_Run\_Id: 21771, Comment:

Data file C:\Documents and Settings\Administrator\Desktop\farah BHU\spot set plate\Farah-Garima 11May 2013\ppw\_E3\_136842129700.txt

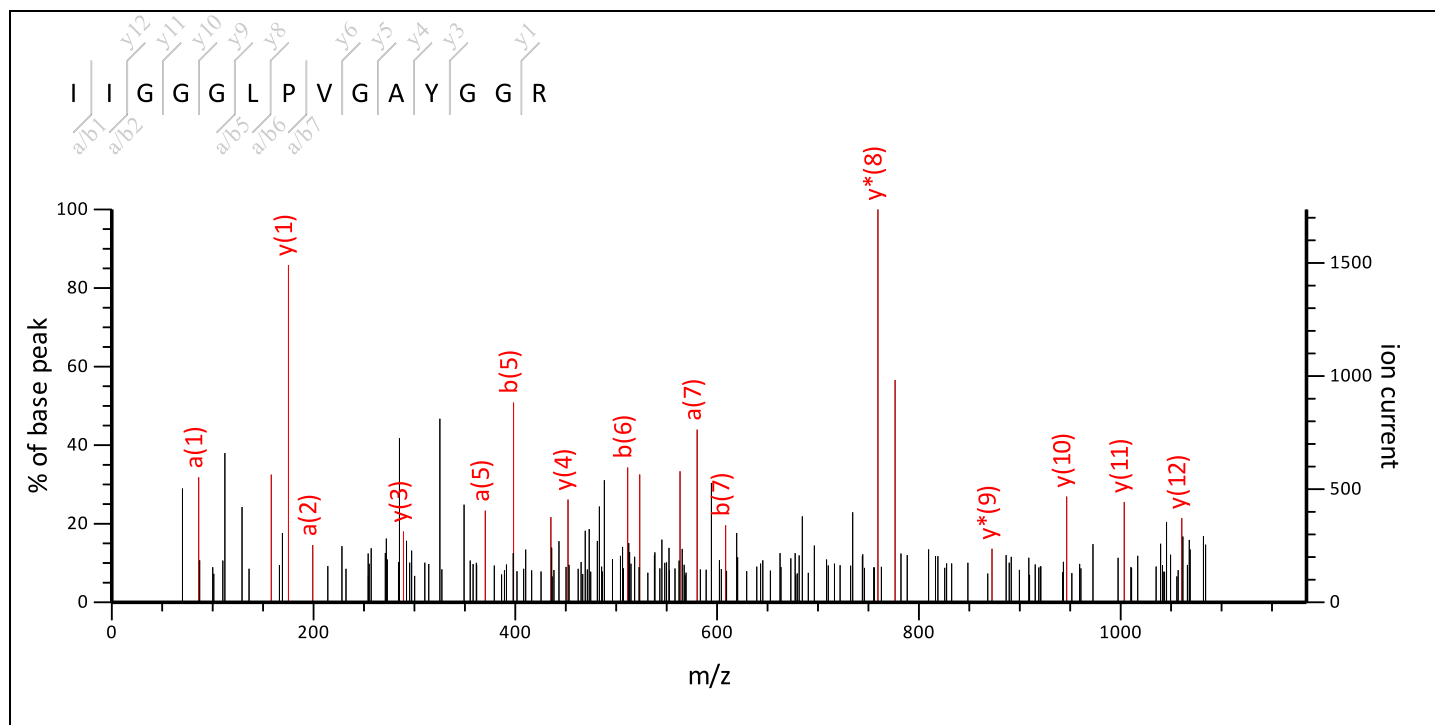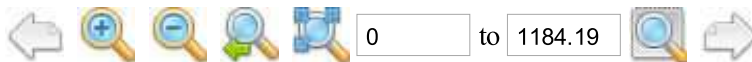

Label all possible matches  Label matches used for scoring

**Monoisotopic mass of neutral peptide Mr(calc):** 1285.7143

**Fixed modifications:** Carbamidomethyl (C) (apply to specified residues or termini only)

**Ions Score:** 49 **Expect:** 0.027

**Matches:** 21/52 fragment ions using 42 most intense peaks ([help](#))

| # | a        | b        | Seq. | y         | y*        | #  |
|---|----------|----------|------|-----------|-----------|----|
| 1 | 86.0964  | 114.0913 | I    |           |           | 14 |
| 2 | 199.1805 | 227.1754 | I    | 1173.6375 | 1156.6109 | 13 |
| 3 | 256.2020 | 284.1969 | G    | 1060.5534 | 1043.5269 | 12 |
| 4 | 313.2234 | 341.2183 | G    | 1003.5320 | 986.5054  | 11 |
| 5 | 370.2449 | 398.2398 | G    | 946.5105  | 929.4839  | 10 |
| 6 | 483.3289 | 511.3239 | L    | 889.4890  | 872.4625  | 9  |
| 7 | 580.3817 | 608.3766 | P    | 776.4050  | 759.3784  | 8  |
| 8 | 679.4501 | 707.4450 | V    | 679.3522  | 662.3257  | 7  |

|    |           |           |   |          |          |   |
|----|-----------|-----------|---|----------|----------|---|
| 9  | 736.4716  | 764.4665  | G | 580.2838 | 563.2572 | 6 |
| 10 | 807.5087  | 835.5036  | A | 523.2623 | 506.2358 | 5 |
| 11 | 970.5720  | 998.5669  | Y | 452.2252 | 435.1987 | 4 |
| 12 | 1027.5935 | 1055.5884 | G | 289.1619 | 272.1353 | 3 |
| 13 | 1084.6150 | 1112.6099 | G | 232.1404 | 215.1139 | 2 |
| 14 |           |           | R | 175.1190 | 158.0924 | 1 |

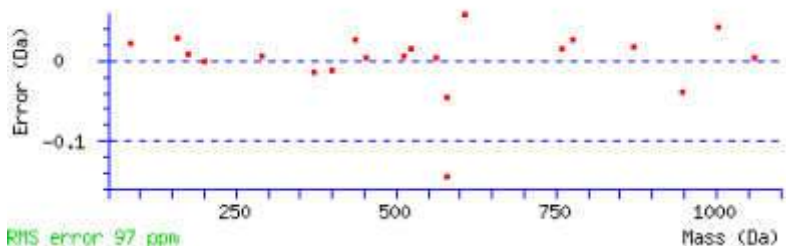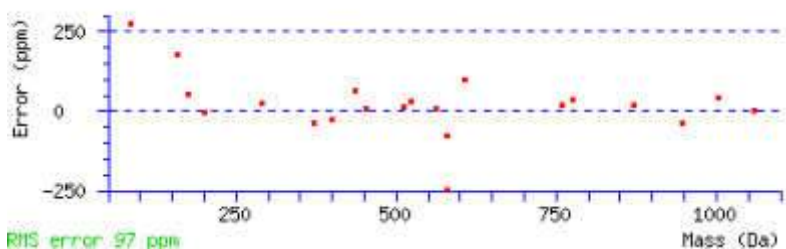

NCBI **BLAST** search of [IIGGGLPVGAYGGR](#)

(Parameters: blastp, nr protein database, expect=20000, no filter, PAM30)

Other BLAST [web gateways](#)

#### All matches to this query

| Score | Mr(calc)  | Delta   | Sequence                       |
|-------|-----------|---------|--------------------------------|
| 48.8  | 1285.7143 | -0.0022 | <a href="#">IIGGGLPVGAYGGR</a> |
| 12.5  | 1285.6680 | 0.0441  | <a href="#">RAGFFGAPPPNR</a>   |
| 12.3  | 1285.7619 | -0.0497 | <a href="#">LLGHRLPLDPR</a>    |
| 11.2  | 1285.6561 | 0.0560  | <a href="#">RAIGLGEASPCR</a>   |
| 10.8  | 1285.7870 | -0.0749 | <a href="#">ARLGIFILDLR</a>    |
| 10.8  | 1285.6925 | 0.0197  | <a href="#">ARLGLVECVNR</a>    |
| 10.8  | 1285.7142 | -0.0021 | <a href="#">VIKGLEAWASGR</a>   |
| 10.8  | 1285.6779 | 0.0343  | <a href="#">VLQGLEAWASGR</a>   |
| 10.8  | 1285.6237 | 0.0884  | <a href="#">DPANIVWMANR</a>    |
| 10.1  | 1285.7255 | -0.0134 | <a href="#">NVALIGHLQHGK</a>   |

Mascot: <http://www.matrixscience.com/>



# Mascot Search Results

## Peptide View Spot no 136

### MS/MS Fragmentation of **SVGGQPIVMDSVK**

Found in [gi|255571784](#) in **NCBI**nr, glutamate-1-semialdehyde 2,1-aminomutase, putative [*Ricinus communis*]

Match to Query 144: 1331.678724 from(1332.686000,1+) intensity(0.0000) index(16)

Title: Label: E3, Spot\_Id: 219710, Peak\_List\_Id: 225269, MSMS Job\_Run\_Id: 21771, Comment:

Data file C:\Documents and Settings\Administrator\Desktop\farah BHU\spot set plate\Farah-Garima 11May 2013\ppw\_E3\_136842129700.txt

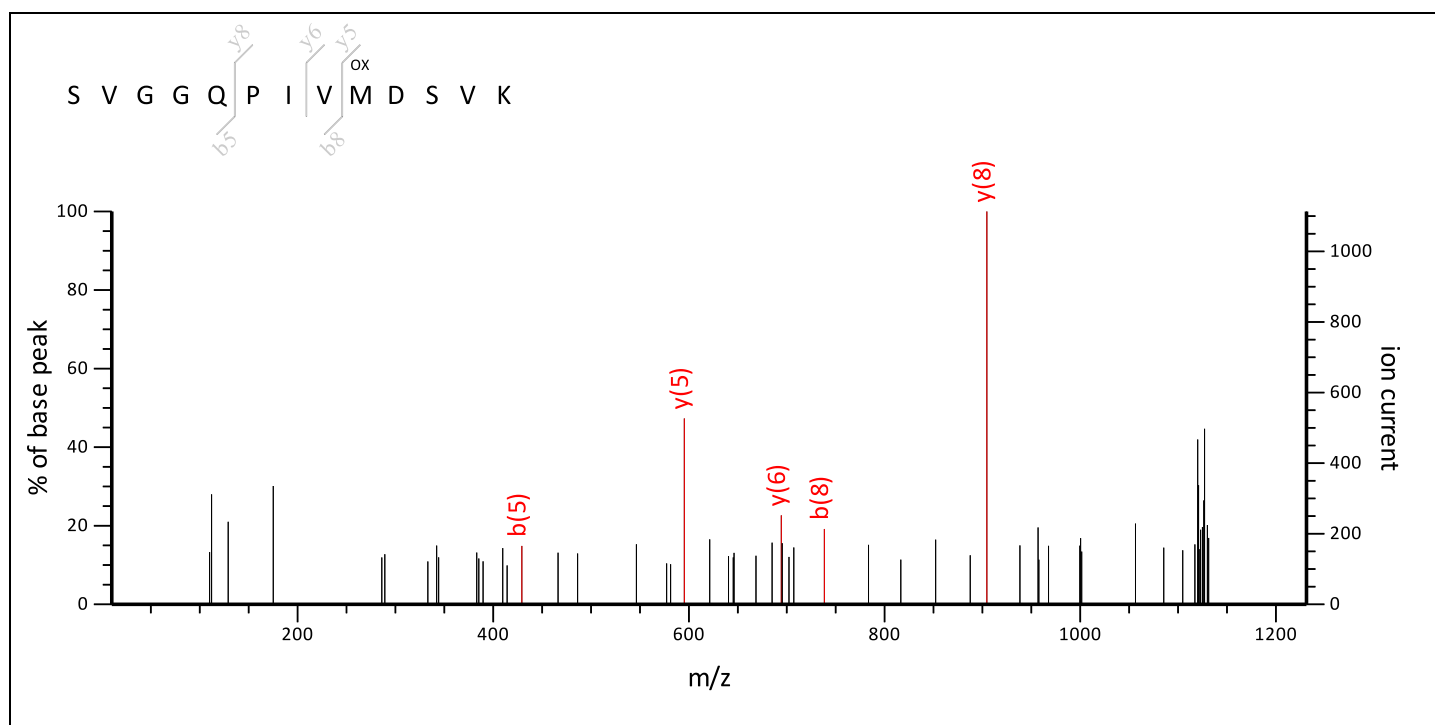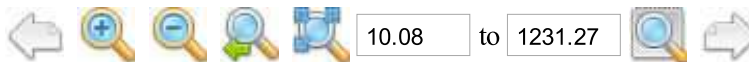

Label all possible matches  Label matches used for scoring

**Monoisotopic mass of neutral peptide Mr(calc):** 1331.6755

**Fixed modifications:** Carbamidomethyl (C) (apply to specified residues or termini only)

**Variable modifications:**

**M9** : Oxidation (M), with neutral losses 0.0000 (shown in table), 63.9983

**Ions Score:** 8 **Expect:** 3.4e+02

**Matches** : 5/96 fragment ions using 11 most intense peaks ([help](#))

| # | a        | a*       | b               | b*       | Seq. | y               | y*        | #  |
|---|----------|----------|-----------------|----------|------|-----------------|-----------|----|
| 1 | 60.0444  |          | 88.0393         |          | S    |                 |           | 13 |
| 2 | 159.1128 |          | 187.1077        |          | V    | 1245.6508       | 1228.6242 | 12 |
| 3 | 216.1343 |          | 244.1292        |          | G    | 1146.5823       | 1129.5558 | 11 |
| 4 | 273.1557 |          | 301.1506        |          | G    | 1089.5609       | 1072.5343 | 10 |
| 5 | 401.2143 | 384.1878 | <b>429.2092</b> | 412.1827 | Q    | 1032.5394       | 1015.5129 | 9  |
| 6 | 498.2671 | 481.2405 | 526.2620        | 509.2354 | P    | <b>904.4808</b> | 887.4543  | 8  |

|    |           |           |                 |           |   |                 |          |   |
|----|-----------|-----------|-----------------|-----------|---|-----------------|----------|---|
| 7  | 611.3511  | 594.3246  | 639.3461        | 622.3195  | I | 807.4281        | 790.4015 | 7 |
| 8  | 710.4196  | 693.3930  | <b>738.4145</b> | 721.3879  | V | <b>694.3440</b> | 677.3175 | 6 |
| 9  | 857.4550  | 840.4284  | 885.4499        | 868.4233  | M | <b>595.2756</b> | 578.2490 | 5 |
| 10 | 972.4819  | 955.4553  | 1000.4768       | 983.4503  | D | 448.2402        | 431.2136 | 4 |
| 11 | 1059.5139 | 1042.4874 | 1087.5088       | 1070.4823 | S | 333.2132        | 316.1867 | 3 |
| 12 | 1158.5823 | 1141.5558 | 1186.5773       | 1169.5507 | V | 246.1812        | 229.1547 | 2 |
| 13 |           |           |                 |           | K | 147.1128        | 130.0863 | 1 |

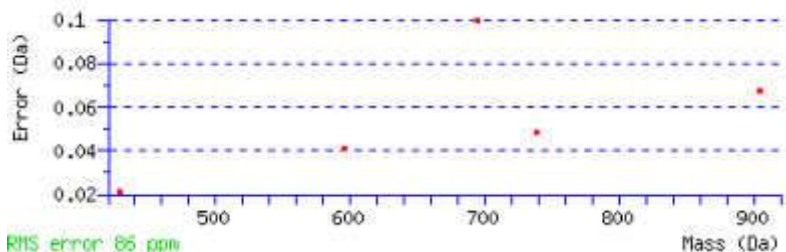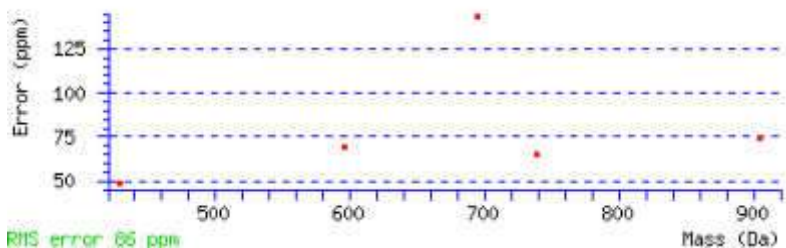

NCBI **BLAST** search of [SVGGQPIVMDSVK](#)

(Parameters: blastp, nr protein database, expect=20000, no filter, PAM30)

Other BLAST [web gateways](#)

#### All matches to this query

| Score | Mr(calc)  | Delta   | Sequence                        |
|-------|-----------|---------|---------------------------------|
| 8.5   | 1331.7272 | -0.0484 | <a href="#">MVVVVLPSFGER</a>    |
| 8.3   | 1331.6755 | 0.0032  | <a href="#">LTDVPLVCSSNK</a>    |
| 8.0   | 1331.7085 | -0.0298 | <a href="#">SVGGQPIVFDSVK</a>   |
| 8.0   | 1331.6755 | 0.0032  | <a href="#">SVGGQPIVMDSVK</a>   |
| 7.0   | 1331.6881 | -0.0094 | <a href="#">CGAGGHVVGLHLR</a>   |
| 6.0   | 1331.6721 | 0.0066  | <a href="#">DISILPPYGDSR</a>    |
| 6.0   | 1331.6833 | -0.0046 | <a href="#">DKANLPNYIER</a>     |
| 6.0   | 1331.7310 | -0.0522 | <a href="#">VDITIPHRPER</a>     |
| 6.0   | 1331.6980 | -0.0192 | <a href="#">KMGIAAGGLGAGTGR</a> |
| 5.7   | 1331.6469 | 0.0318  | <a href="#">EALDPFNEKNR</a>     |

Mascot: <http://www.matrixscience.com/>



# Mascot Search Results

## Peptide View Spot no 138

### MS/MS Fragmentation of **NHGMHFR**

Found in **gi|11466795** in **NCBI nr**, ribulose-1,5-bisphosphate carboxylase/oxygenase large subunit [Oryza sativa Japonica Group]

Match to Query 5: 897.483694 from(898.490970,1+) intensity(0.0000) index(0)

Title: Label: F12, Spot\_Id: 216658, Peak\_List\_Id: 221801, MSMS Job\_Run\_Id: 21391, Comment:

Data file C:\Documents and Settings\Administrator\Desktop\farah BHU\Cotton leaves\RAJESH\12-1-13

raj\ppw\_F12\_136117698300.txt

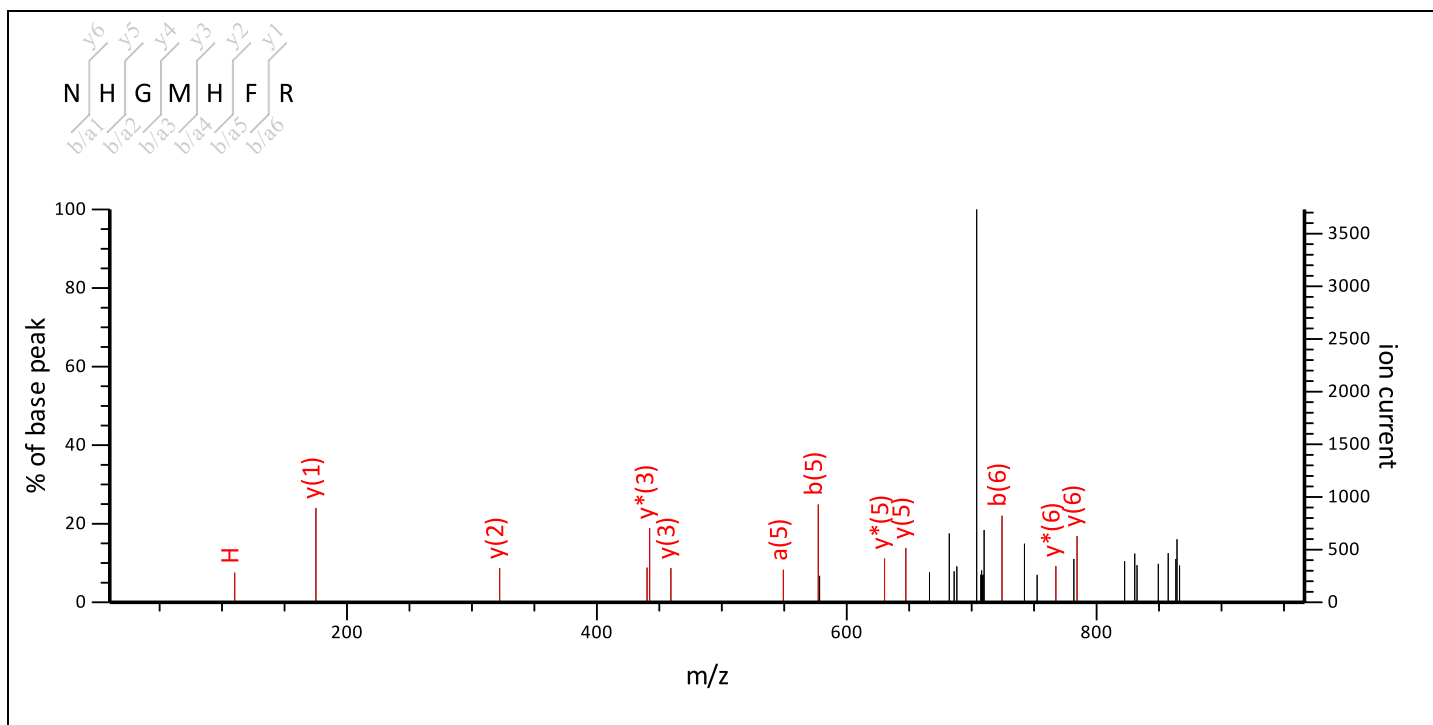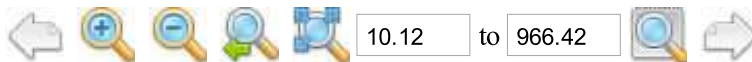

Label all possible matches  Label matches used for scoring

**Monoisotopic mass of neutral peptide Mr(calc):** 897.4028

**Fixed modifications:** Carbamidomethyl (C) (apply to specified residues or termini only)

**Ions Score:** 27 **Expect:** 12

**Matches :** 14/72 fragment ions using 24 most intense peaks ([help](#))

| # | Immon.   | a        | a*       | b        | b*       | d        | Seq. | v        | w        | y        | y*       | # |
|---|----------|----------|----------|----------|----------|----------|------|----------|----------|----------|----------|---|
| 1 | 87.0553  | 87.0553  | 70.0287  | 115.0502 | 98.0237  | 44.0495  | N    |          |          |          |          | 7 |
| 2 | 110.0713 | 224.1142 | 207.0877 | 252.1091 | 235.0826 |          | H    | 702.3140 |          | 784.3671 | 767.3406 | 6 |
| 3 | 30.0338  | 281.1357 | 264.1091 | 309.1306 | 292.1040 |          | G    |          |          | 647.3082 | 630.2817 | 5 |
| 4 | 104.0528 | 412.1761 | 395.1496 | 440.1711 | 423.1445 | 352.1728 | M    | 514.2521 | 513.2568 | 590.2868 | 573.2602 | 4 |
| 5 | 110.0713 | 549.2351 | 532.2085 | 577.2300 | 560.2034 |          | H    | 377.1932 |          | 459.2463 | 442.2197 | 3 |
| 6 | 120.0808 | 696.3035 | 679.2769 | 724.2984 | 707.2718 |          | F    | 230.1248 |          | 322.1874 | 305.1608 | 2 |
| 7 | 129.1135 |          |          |          |          |          | R    | 74.0237  | 73.0284  | 175.1190 | 158.0924 | 1 |

| Seq          | ya       | yb       | Seq        | ya       | yb       | Seq         | ya       | yb       |
|--------------|----------|----------|------------|----------|----------|-------------|----------|----------|
| <b>HG</b>    | 167.0927 | 195.0877 | <b>HGM</b> | 298.1332 | 326.1281 | <b>HGMH</b> | 435.1921 | 463.1870 |
| <b>HGMHF</b> | 582.2605 | 610.2555 | <b>GM</b>  | 161.0743 | 189.0692 | <b>GMH</b>  | 298.1332 | 326.1281 |
| <b>GMHF</b>  | 445.2016 | 473.1966 | <b>MH</b>  | 241.1118 | 269.1067 | <b>MHF</b>  | 388.1802 | 416.1751 |
| <b>HF</b>    | 257.1397 | 285.1346 |            |          |          |             |          |          |

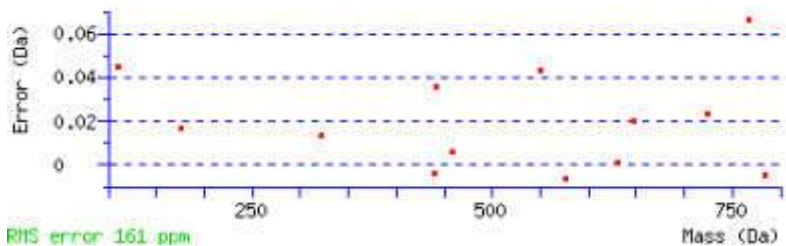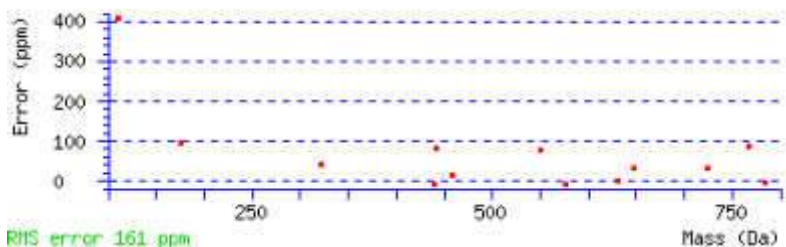

NCBI **BLAST** search of [NHGMHFR](#)

(Parameters: blastp, nr protein database, expect=20000, no filter, PAM30)

Other BLAST [web gateways](#)

#### All matches to this query

| Score | Mr(calc) | Delta   | Sequence                |
|-------|----------|---------|-------------------------|
| 27.3  | 897.4028 | 0.0809  | <a href="#">NHGMHFR</a> |
| 27.3  | 897.4028 | 0.0809  | <a href="#">NHGMHFR</a> |
| 27.3  | 897.4028 | 0.0809  | <a href="#">NHGMHFR</a> |
| 27.3  | 897.4028 | 0.0809  | <a href="#">NHGMHFR</a> |
| 27.3  | 897.4028 | 0.0809  | <a href="#">NHGMHFR</a> |
| 27.3  | 897.4028 | 0.0809  | <a href="#">NHGMHFR</a> |
| 27.3  | 897.4028 | 0.0809  | <a href="#">NHGMHFR</a> |
| 27.3  | 897.4028 | 0.0809  | <a href="#">NHGMHFR</a> |
| 27.3  | 897.3698 | 0.1139  | <a href="#">NHGMHMR</a> |
| 19.5  | 898.3868 | -0.9031 | <a href="#">DHGMHFR</a> |
| 19.5  | 898.3868 | -0.9031 | <a href="#">DHGMHFR</a> |

Mascot: <http://www.matrixscience.com/>



# Mascot Search Results

## Peptide View Spot no 138

### MS/MS Fragmentation of **ACYECLR**

Found in **gi|11466795** in **NCBI**nr, ribulose-1,5-bisphosphate carboxylase/oxygenase large subunit [Oryza sativa Japonica Group]

Match to Query 9: 970.493154 from(971.500430,1+) intensity(0.0000) index(2)

Title: Label: F12, Spot\_Id: 216658, Peak\_List\_Id: 221791, MSMS Job\_Run\_Id: 21391, Comment:

Data file C:\Documents and Settings\Administrator\Desktop\farah BHU\Cotton leaves\RAJESH\12-1-13

raj\ppw\_F12\_136117698300.txt

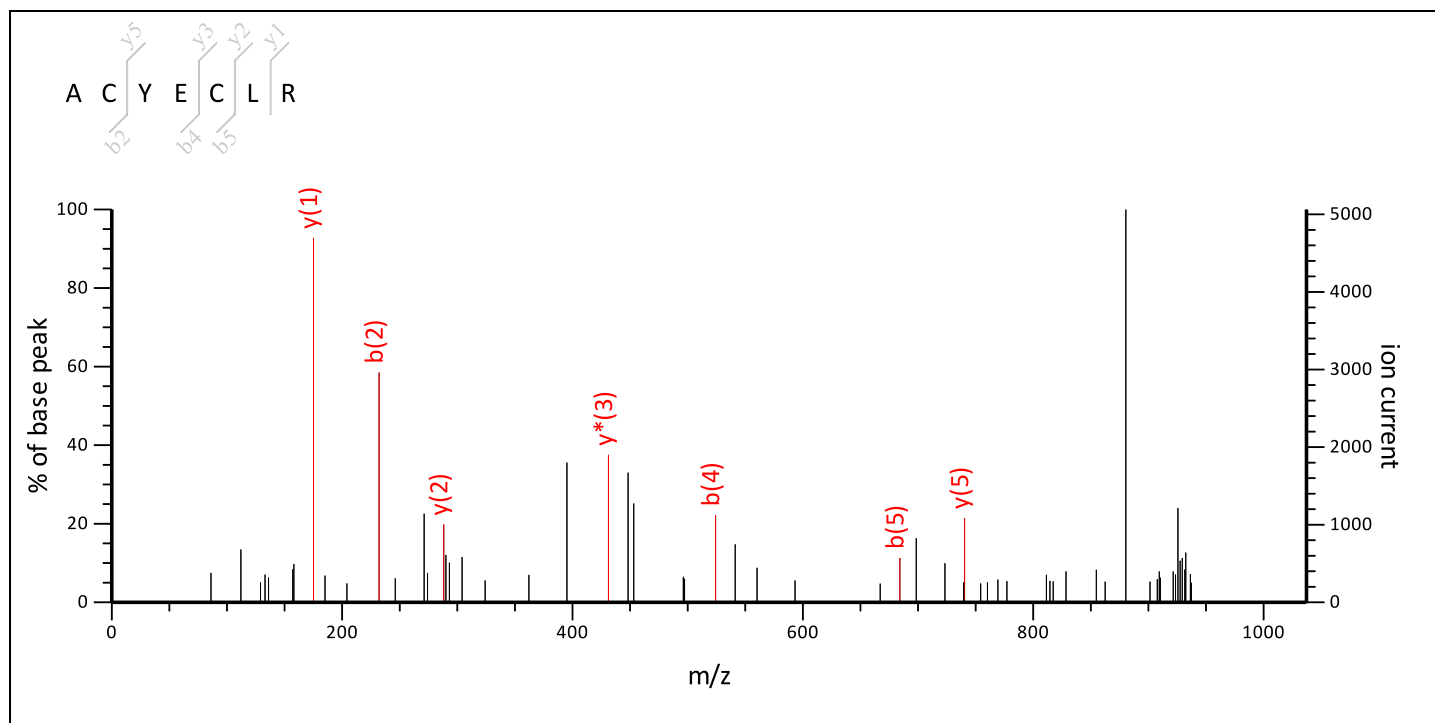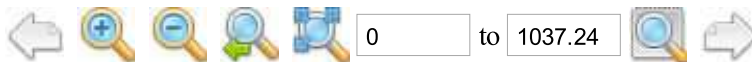

Label all possible matches  Label matches used for scoring

**Monoisotopic mass of neutral peptide Mr(calc):** 970.4001

**Fixed modifications:** Carbamidomethyl (C) (apply to specified residues or termini only)

**Ions Score:** 24 **Expect:** 26

**Matches:** 7/75 fragment ions using 9 most intense peaks ([help](#))

| # | Immon.   | a        | a <sup>0</sup> | b               | b <sup>0</sup> | d        | Seq. | v        | w        | y               | y*              | y <sup>0</sup> | # |
|---|----------|----------|----------------|-----------------|----------------|----------|------|----------|----------|-----------------|-----------------|----------------|---|
| 1 | 44.0495  | 44.0495  |                | 72.0444         |                | 44.0495  | A    |          |          |                 |                 |                | 7 |
| 2 | 133.0430 | 204.0801 |                | <b>232.0750</b> |                | 115.0866 | C    | 795.3454 | 794.3502 | 900.3702        | 883.3437        | 882.3597       | 6 |
| 3 | 136.0757 | 367.1435 |                | 395.1384        |                |          | Y    | 632.2821 |          | <b>740.3396</b> | 723.3130        | 722.3290       | 5 |
| 4 | 102.0550 | 496.1860 | 478.1755       | <b>524.1810</b> | 506.1704       | 438.1806 | E    | 503.2395 | 502.2442 | 577.2763        | 560.2497        | 559.2657       | 4 |
| 5 | 133.0430 | 656.2167 | 638.2061       | <b>684.2116</b> | 666.2010       | 567.2232 | C    | 343.2088 | 342.2136 | 448.2337        | <b>431.2071</b> |                | 3 |
| 6 | 86.0964  | 769.3008 | 751.2902       | 797.2957        | 779.2851       | 727.2538 | L    | 230.1248 | 229.1295 | <b>288.2030</b> | 271.1765        |                | 2 |
| 7 | 129.1135 |          |                |                 |                |          | R    | 74.0237  | 73.0284  | <b>175.1190</b> | 158.0924        |                | 1 |



| Seq          | ya       | yb       | Seq        | ya       | yb       | Seq         | ya       | yb       |
|--------------|----------|----------|------------|----------|----------|-------------|----------|----------|
| <b>CY</b>    | 296.1063 | 324.1013 | <b>CYE</b> | 425.1489 | 453.1438 | <b>CYEC</b> | 585.1796 | 613.1745 |
| <b>CYECL</b> | 698.2636 | 726.2586 | <b>YE</b>  | 265.1183 | 293.1132 | <b>YEC</b>  | 425.1489 | 453.1438 |
| <b>YECL</b>  | 538.2330 | 566.2279 | <b>EC</b>  | 262.0856 | 290.0805 | <b>ECL</b>  | 375.1697 | 403.1646 |
| <b>CL</b>    | 246.1271 | 274.1220 |            |          |          |             |          |          |

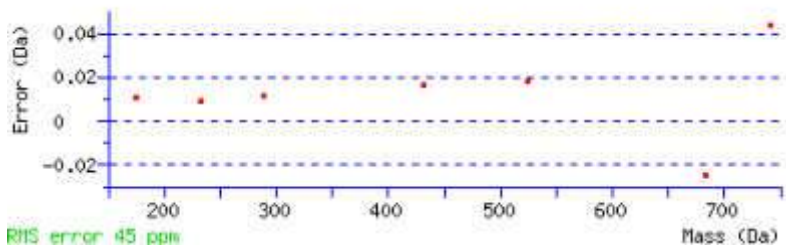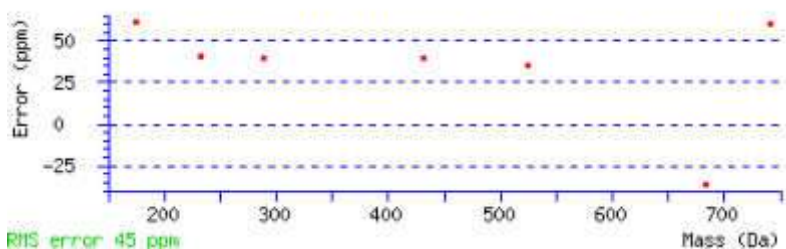

NCBI **BLAST** search of [ACYECLR](#)

(Parameters: blastp, nr protein database, expect=20000, no filter, PAM30)

Other BLAST [web gateways](#)

#### All matches to this query

| Score | Mr(calc) | Delta   | Sequence                 |
|-------|----------|---------|--------------------------|
| 29.3  | 970.5243 | -0.0311 | <a href="#">MRPRAQGR</a> |
| 24.0  | 970.4001 | 0.0931  | <a href="#">ACYECIR</a>  |
| 24.0  | 970.4001 | 0.0931  | <a href="#">ACYECLR</a>  |
| 24.0  | 970.4001 | 0.0931  | <a href="#">ACYECLR</a>  |
| 24.0  | 970.4001 | 0.0931  | <a href="#">ACYECLR</a>  |
| 24.0  | 970.4001 | 0.0931  | <a href="#">ACYECLR</a>  |
| 22.2  | 970.4953 | -0.0021 | <a href="#">RMCHVLR</a>  |
| 17.8  | 971.4607 | -0.9675 | <a href="#">SSNCHVIR</a> |
| 17.5  | 970.4953 | -0.0021 | <a href="#">MRVHCLR</a>  |
| 16.6  | 970.4807 | 0.0125  | <a href="#">ACFAPHLR</a> |

Mascot: <http://www.matrixscience.com/>



# Mascot Search Results

## Peptide View **Spot no 138**

### MS/MS Fragmentation of **DTDILAAFR**

Found in [gi|11466795](#) in **NCBI**nr, ribulose-1,5-bisphosphate carboxylase/oxygenase large subunit [Oryza sativa Japonica Group]

Match to Query 13: 1020.621424 from(1021.628700,1+) intensity(0.0000) index(4)

Title: Label: F12, Spot\_Id: 216658, Peak\_List\_Id: 221802, MSMS Job\_Run\_Id: 21391, Comment:

Data file C:\Documents and Settings\Administrator\Desktop\farah BHU\Cotton leaves\RAJESH\12-1-13 raj\ppw\_F12\_136117698300.txt

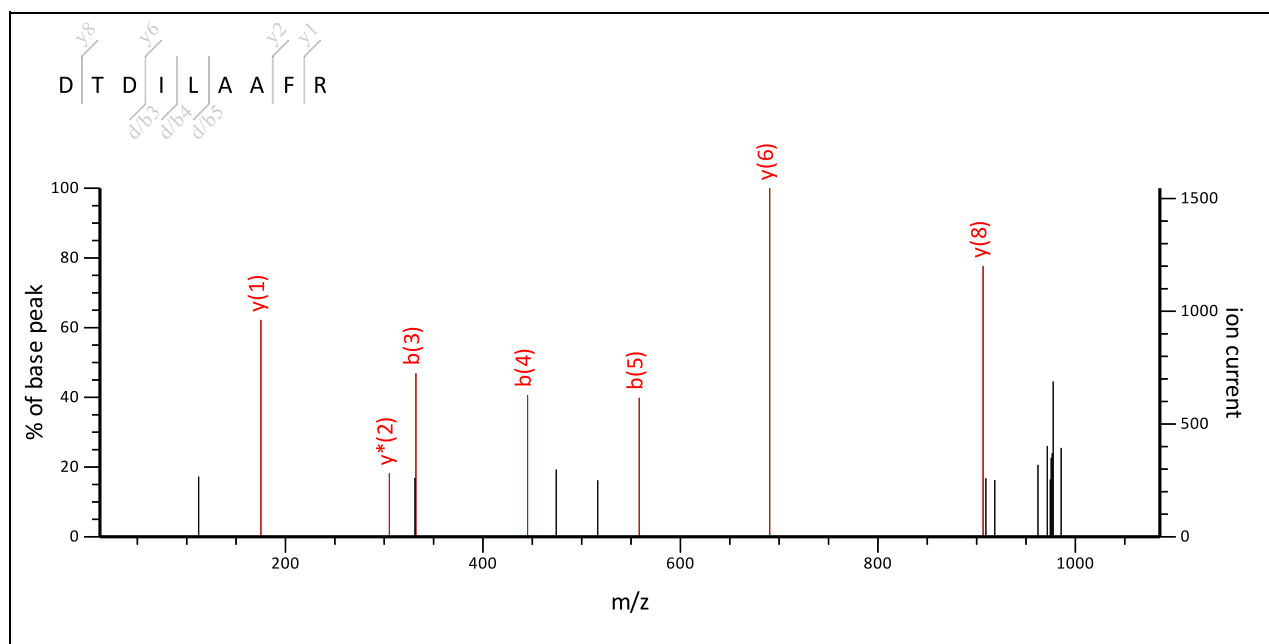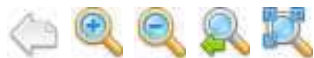

12.1

to

1085.58

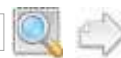

Label all possible matches  Label matches used for scoring

**Monoisotopic mass of neutral peptide Mr(calc):** 1020.5240

**Fixed modifications:** Carbamidomethyl (C) (apply to specified residues or termini only)

**Ions Score:** 33 **Expect:** 4.6

**Matches:** 8/121 fragment ions using 8 most intense peaks ([help](#))

| # | Immon.   | a        | a <sup>0</sup> | b               | b <sup>0</sup> | d        | d'              | Seq.     | v        | w        | w'       | y               | y*              | y <sup>0</sup> | #        |
|---|----------|----------|----------------|-----------------|----------------|----------|-----------------|----------|----------|----------|----------|-----------------|-----------------|----------------|----------|
| 1 | 88.0393  | 88.0393  | 70.0287        | 116.0342        | 98.0237        | 44.0495  |                 | <b>D</b> |          |          |          |                 |                 |                | <b>9</b> |
| 2 | 74.0600  | 189.0870 | 171.0764       | 217.0819        | 199.0713       | 173.0921 | <b>175.0713</b> | <b>T</b> | 860.4625 | 873.4829 | 875.4621 | <b>906.5043</b> | 889.4778        | 888.4938       | <b>8</b> |
| 3 | 88.0393  | 304.1139 | 286.1034       | <b>332.1088</b> | 314.0983       | 260.1241 |                 | <b>D</b> | 745.4355 | 744.4403 |          | 805.4567        | 788.4301        | 787.4461       | <b>7</b> |
| 4 | 86.0964  | 417.1980 | 399.1874       | <b>445.1929</b> | 427.1823       | 389.1667 | 403.1823        | <b>I</b> | 632.3515 | 645.3719 | 659.3875 | <b>690.4297</b> | 673.4032        |                | <b>6</b> |
| 5 | 86.0964  | 530.2821 | 512.2715       | <b>558.2770</b> | 540.2664       | 488.2351 |                 | <b>L</b> | 519.2674 | 518.2722 |          | 577.3457        | 560.3191        |                | <b>5</b> |
| 6 | 44.0495  | 601.3192 | 583.3086       | 629.3141        | 611.3035       |          |                 | <b>A</b> | 448.2303 |          |          | 464.2616        | 447.2350        |                | <b>4</b> |
| 7 | 44.0495  | 672.3563 | 654.3457       | 700.3512        | 682.3406       |          |                 | <b>A</b> | 377.1932 |          |          | 393.2245        | 376.1979        |                | <b>3</b> |
| 8 | 120.0808 | 819.4247 | 801.4141       | 847.4196        | 829.4090       |          |                 | <b>F</b> | 230.1248 |          |          | 322.1874        | <b>305.1608</b> |                | <b>2</b> |
| 9 | 129.1135 |          |                |                 |                |          |                 | <b>R</b> | 74.0237  | 73.0284  |          | <b>175.1190</b> | 158.0924        |                | <b>1</b> |

| Seq          | ya       | yb       | Seq           | ya       | yb       | Seq          | ya       | yb       |
|--------------|----------|----------|---------------|----------|----------|--------------|----------|----------|
| <b>TD</b>    | 189.0870 | 217.0819 | <b>TDI</b>    | 302.1710 | 330.1660 | <b>TDIL</b>  | 415.2551 | 443.2500 |
| <b>TDILA</b> | 486.2922 | 514.2871 | <b>TDILAA</b> | 557.3293 | 585.3243 | <b>DI</b>    | 201.1234 | 229.1183 |
| <b>DIL</b>   | 314.2074 | 342.2023 | <b>DILA</b>   | 385.2445 | 413.2395 | <b>DILAA</b> | 456.2817 | 484.2766 |

|               |          |          |              |          |          |            |          |          |
|---------------|----------|----------|--------------|----------|----------|------------|----------|----------|
| <b>DILAAF</b> | 603.3501 | 631.3450 | <b>IL</b>    | 199.1805 | 227.1754 | <b>ILA</b> | 270.2176 | 298.2125 |
| <b>ILAA</b>   | 341.2547 | 369.2496 | <b>ILAAF</b> | 488.3231 | 516.3180 | <b>LA</b>  | 157.1335 | 185.1285 |
| <b>LAA</b>    | 228.1707 | 256.1656 | <b>LAAF</b>  | 375.2391 | 403.2340 | <b>AA</b>  | 115.0866 | 143.0815 |
| <b>AAF</b>    | 262.1550 | 290.1499 | <b>AF</b>    | 191.1179 | 219.1128 |            |          |          |

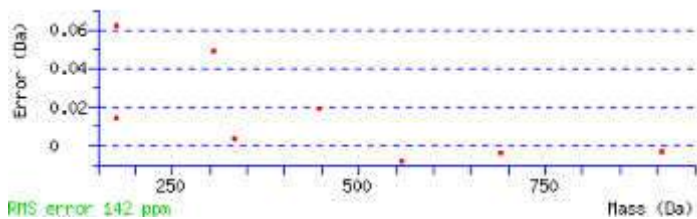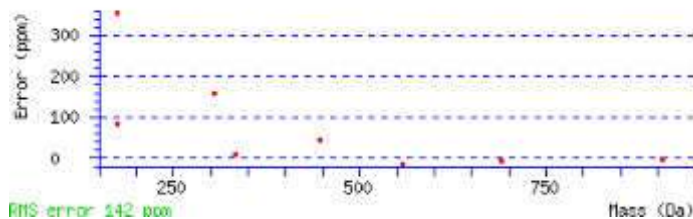

NCBI **BLAST** search of [DTDILAAFR](#)

(Parameters: blastp, nr protein database, expect=20000, no filter, PAM30)

Other BLAST [web gateways](#)

#### All matches to this query

| Score | Mr(calc)  | Delta  | Sequence                  |
|-------|-----------|--------|---------------------------|
| 32.6  | 1020.5240 | 0.0974 | <a href="#">DTDIIAAFR</a> |
| 32.6  | 1020.5240 | 0.0974 | <a href="#">DTDIIAAFR</a> |
| 32.6  | 1020.5240 | 0.0974 | <a href="#">DTDILAAFR</a> |
| 32.6  | 1020.5240 | 0.0974 | <a href="#">DTDILAAFR</a> |
| 32.6  | 1020.5240 | 0.0974 | <a href="#">DTDILAAFR</a> |
| 32.6  | 1020.5240 | 0.0974 | <a href="#">DTDILAAFR</a> |
| 32.6  | 1020.5240 | 0.0974 | <a href="#">DTDILAAFR</a> |
| 32.6  | 1020.5240 | 0.0974 | <a href="#">DTDILAAFR</a> |
| 32.6  | 1020.5240 | 0.0974 | <a href="#">DTDILAAFR</a> |
| 32.6  | 1020.5240 | 0.0974 | <a href="#">DTDILAAFR</a> |
| 32.6  | 1020.5240 | 0.0974 | <a href="#">DTDILAAFR</a> |

Mascot: <http://www.matrixscience.com/>



|    |          |          |  |  |  |  |  |  |
|----|----------|----------|--|--|--|--|--|--|
| IH | 223.1553 | 251.1503 |  |  |  |  |  |  |
|----|----------|----------|--|--|--|--|--|--|

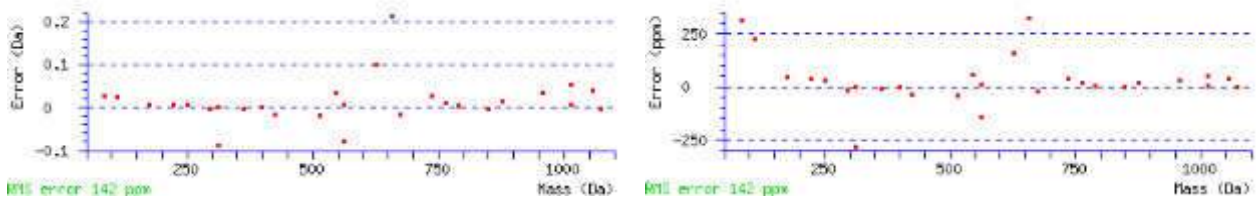

NCBI BLAST search of [DNGLLLIHR](#)

(Parameters: blastp, nr protein database, expect=20000, no filter, PAM30)

Other BLAST [web gateways](#)

#### All matches to this query

| Score | Mr(calc)  | Delta  | Sequence                   |
|-------|-----------|--------|----------------------------|
| 72.5  | 1186.6571 | 0.1138 | <a href="#">DNGILIIHR</a>  |
| 72.5  | 1186.6571 | 0.1138 | <a href="#">DNGILLIHR</a>  |
| 72.5  | 1186.6571 | 0.1138 | <a href="#">DNGILLIHR</a>  |
| 72.5  | 1186.6571 | 0.1138 | <a href="#">DNGILLIHR</a>  |
| 72.5  | 1186.6571 | 0.1138 | <a href="#">DNGLILIIHR</a> |
| 72.5  | 1186.6571 | 0.1138 | <a href="#">DNGLILIIHR</a> |
| 72.5  | 1186.6571 | 0.1138 | <a href="#">DNGLLIHR</a>   |
| 72.5  | 1186.6571 | 0.1138 | <a href="#">DNGLLIHR</a>   |
| 72.5  | 1186.6571 | 0.1138 | <a href="#">DNGLLLIIHR</a> |
| 72.5  | 1186.6571 | 0.1138 | <a href="#">DNGLLLIIHR</a> |

Mascot: <http://www.matrixscience.com/>


**Mascot Search Results**
**Peptide View**      **Spot no 138**
**MS/MS Fragmentation of FVFCAEAIYK**

 Found in **gi11466795** in **NCBI nr**, ribulose-1,5-bisphosphate carboxylase/oxygenase large subunit [Oryza sativa Japonica Group]

Match to Query 25: 1246.718424 from(1247.725700,1+) intensity(0.0000) index(9)

Title: Label: F12, Spot\_Id: 216658, Peak\_List\_Id: 221789, MSMS Job\_Run\_Id: 21391, Comment:

Data file C:\Documents and Settings\Administrator\Desktop\farah BHU\Cotton leaves\RAJESH\12-1-13 raj\ppw\_F12\_136117698300.txt

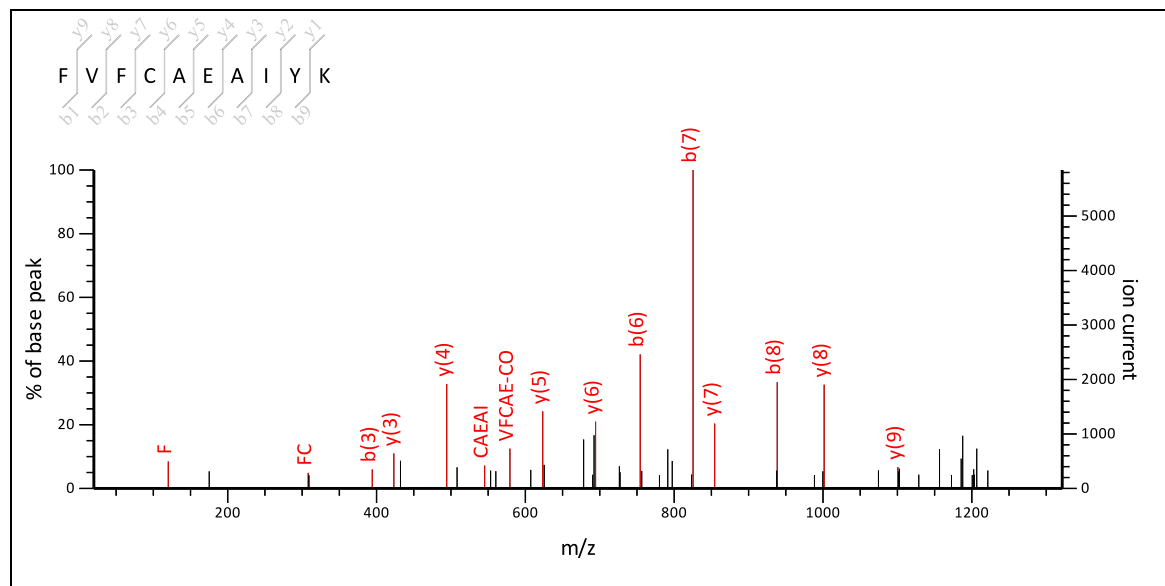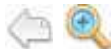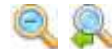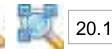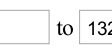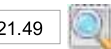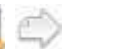

20.1 to 1321.49

 Label all possible matches  Label matches used for scoring 
**Monoisotopic mass of neutral peptide Mr(calc):** 1246.6056

**Fixed modifications:** Carbamidomethyl (C) (apply to specified residues or termini only)

**Ions Score:** 52 **Expect:** 0.041

**Matches:** 18/129 fragment ions using 22 most intense peaks ([help](#))

| #  | Immon.   | a         | a <sup>0</sup> | b         | b <sup>0</sup> | d        | d <sup>+</sup> | Seq. | v         | w         | w <sup>+</sup> | y         | y <sup>*</sup> | y <sup>0</sup> | #  |
|----|----------|-----------|----------------|-----------|----------------|----------|----------------|------|-----------|-----------|----------------|-----------|----------------|----------------|----|
| 1  | 120.0808 | 120.0808  |                | 148.0757  |                | 44.0495  |                | F    |           |           |                |           |                |                | 10 |
| 2  | 72.0808  | 219.1492  |                | 247.1441  |                | 205.1335 |                | V    | 1056.4819 | 1069.5023 |                | 1100.5445 | 1083.5179      | 1082.5339      | 9  |
| 3  | 120.0808 | 366.2176  |                | 394.2125  |                |          |                | F    | 909.4135  |           |                | 1001.4761 | 984.4495       | 983.4655       | 8  |
| 4  | 133.0430 | 526.2483  |                | 554.2432  |                | 437.2547 |                | C    | 749.3828  | 748.3876  |                | 854.4077  | 837.3811       | 836.3971       | 7  |
| 5  | 44.0495  | 597.2854  |                | 625.2803  |                |          |                | A    | 678.3457  |           |                | 694.3770  | 677.3505       | 676.3665       | 6  |
| 6  | 102.0550 | 726.3280  | 708.3174       | 754.3229  | 736.3123       | 668.3225 |                | E    | 549.3031  | 548.3079  |                | 623.3399  | 606.3134       | 605.3293       | 5  |
| 7  | 44.0495  | 797.3651  | 779.3545       | 825.3600  | 807.3494       |          |                | A    | 478.2660  |           |                | 494.2973  | 477.2708       |                | 4  |
| 8  | 86.0964  | 910.4491  | 892.4386       | 938.4441  | 920.4335       | 882.4178 | 896.4335       | I    | 365.1819  | 378.2023  | 392.2180       | 423.2602  | 406.2336       |                | 3  |
| 9  | 136.0757 | 1073.5125 | 1055.5019      | 1101.5074 | 1083.4968      |          |                | Y    | 202.1186  |           |                | 310.1761  | 293.1496       |                | 2  |
| 10 | 101.1073 |           |                |           |                |          |                | K    | 74.0237   | 73.0284   |                | 147.1128  | 130.0863       |                | 1  |

| Seq    | ya       | yb       | Seq    | ya       | yb       | Seq    | ya       | yb       |
|--------|----------|----------|--------|----------|----------|--------|----------|----------|
| VF     | 219.1492 | 247.1441 | VFC    | 379.1798 | 407.1748 | VFCA   | 450.2170 | 478.2119 |
| VFCAE  | 579.2595 | 607.2545 | VFCAEA | 650.2967 | 678.2916 | FC     | 280.1114 | 308.1063 |
| FCA    | 351.1485 | 379.1435 | FCAE   | 480.1911 | 508.1860 | FCAEA  | 551.2282 | 579.2232 |
| FCAEAI | 664.3123 | 692.3072 | CA     | 204.0801 | 232.0750 | CAE    | 333.1227 | 361.1176 |
| CAEA   | 404.1598 | 432.1547 | CAEAI  | 517.2439 | 545.2388 | CAEAIY | 680.3072 | 708.3021 |
| AE     | 173.0921 | 201.0870 | AEA    | 244.1292 | 272.1241 | AEAI   | 357.2132 | 385.2082 |

|                       |          |          |                    |          |          |                     |          |          |
|-----------------------|----------|----------|--------------------|----------|----------|---------------------|----------|----------|
| <a href="#">AEAIY</a> | 520.2766 | 548.2715 | <a href="#">EA</a> | 173.0921 | 201.0870 | <a href="#">EAI</a> | 286.1761 | 314.1710 |
| <a href="#">EAIY</a>  | 449.2395 | 477.2344 | <a href="#">AI</a> | 157.1335 | 185.1285 | <a href="#">AIY</a> | 320.1969 | 348.1918 |
| <a href="#">IY</a>    | 249.1598 | 277.1547 |                    |          |          |                     |          |          |

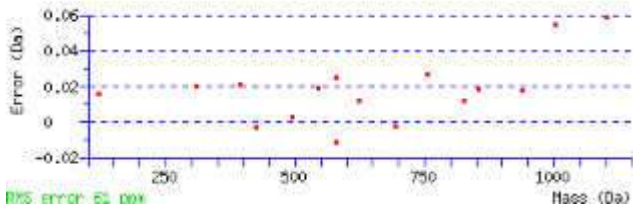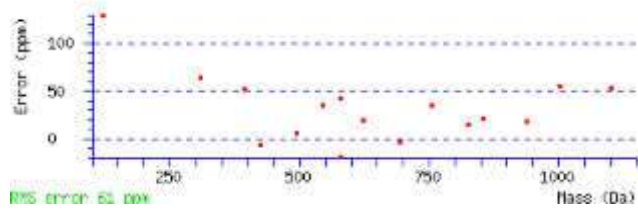

NCBI BLAST search of [FVFCAEAIYK](#)  
 (Parameters: blastp, nr protein database, expect=20000, no filter, PAM30)  
 Other BLAST [web gateways](#)

All matches to this query

| Score | Mr(calcd) | Delta  | Sequence                   |
|-------|-----------|--------|----------------------------|
| 51.8  | 1246.6056 | 0.1128 | <a href="#">FVFCAEAIYK</a> |
| 51.8  | 1246.6056 | 0.1128 | <a href="#">FVFCAEAIYK</a> |
| 51.8  | 1246.6056 | 0.1128 | <a href="#">FVFCAEAIYK</a> |
| 51.8  | 1246.6056 | 0.1128 | <a href="#">FVFCAEAIYK</a> |
| 51.8  | 1246.6056 | 0.1128 | <a href="#">FVFCAEAIYK</a> |
| 51.8  | 1246.6056 | 0.1128 | <a href="#">FVFCAEAIYK</a> |
| 51.8  | 1246.6056 | 0.1128 | <a href="#">FVFCAEAIYK</a> |
| 51.8  | 1246.6056 | 0.1128 | <a href="#">FVFCAEAIYK</a> |
| 51.8  | 1246.6056 | 0.1128 | <a href="#">FVFCAEALYK</a> |
| 51.8  | 1246.6056 | 0.1128 | <a href="#">FVFCAEALYK</a> |
| 51.8  | 1246.6056 | 0.1128 | <a href="#">FVFCAEALYK</a> |

Mascot: <http://www.matrixscience.com/>



**MATRIX SCIENCE Mascot Search Results**

**Peptide View Spot no 138**

MS/MS Fragmentation of **TFQPPHGIQVER**

Found in **gi|11466795** in **NCBI**nr, ribulose-1,5-bisphosphate carboxylase/oxygenase large subunit [Oryza sativa Japonica Group]

Match to Query 39: 1464.881124 from(1465.888400,1+) intensity(0.0000) index(12)

Title: Label: F12, Spot\_Id: 216658, Peak\_List\_Id: 221779, MSMS Job\_Run\_Id: 21391, Comment:

Data file C:\Documents and Settings\Administrator\Desktop\farah BHU\Cotton leaves\RAJESH\12-1-13 raj\ppw\_F12\_136117698300.txt

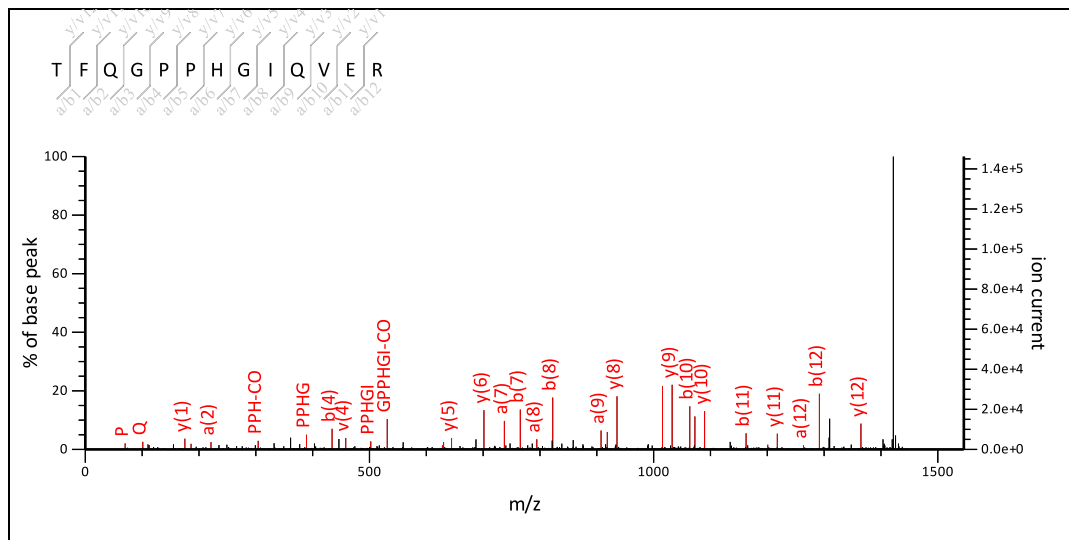

Navigation icons: Home, Back, Forward, Search, etc. Range: 0 to 1545.82

Label all possible matches  Label matches used for scoring

Monoisotopic mass of neutral peptide Mr(calc): 1464.7474

Fixed modifications: Carbamidomethyl (C) (apply to specified residues or termini only)

Ions Score: 100 Expect: 6.5e-07

Matches : 48/229 fragment ions using 42 most intense peaks (help)

| #  | Immon.          | a                | a*              | a <sup>0</sup> | b                | b*              | b <sup>0</sup> | d         | d'       | Seq. | v               | w         | w'       | y                | y*               |
|----|-----------------|------------------|-----------------|----------------|------------------|-----------------|----------------|-----------|----------|------|-----------------|-----------|----------|------------------|------------------|
| 1  | 74.0600         | 74.0600          |                 | 56.0495        | 102.0550         |                 | 84.0444        | 44.0495   |          | T    |                 |           |          |                  |                  |
| 2  | 120.0808        | <b>221.1285</b>  |                 | 203.1179       | 249.1234         |                 | 231.1128       |           |          | F    | 1272.6444       |           |          | <b>1364.7070</b> | 1347.6804        |
| 3  | <b>101.0709</b> | 349.1870         | <b>332.1605</b> | 331.1765       | 377.1819         | 360.1554        | 359.1714       | 292.1656  |          | Q    | 1144.5858       | 1143.5905 |          | <b>1217.6385</b> | <b>1200.6120</b> |
| 4  | 30.0338         | 406.2085         | <b>389.1819</b> | 388.1979       | <b>434.2034</b>  | 417.1769        | 416.1928       |           |          | G    |                 |           |          | <b>1089.5800</b> | <b>1072.5534</b> |
| 5  | <b>70.0651</b>  | 503.2613         | 486.2347        | 485.2507       | <b>531.2562</b>  | 514.2296        | 513.2456       | 477.2456  |          | P    | 990.5116        | 989.5163  |          | <b>1032.5585</b> | <b>1015.5320</b> |
| 6  | <b>70.0651</b>  | 600.3140         | 583.2875        | 582.3035       | <b>628.3089</b>  | 611.2824        | 610.2984       | 574.2984  |          | P    | 893.4588        | 892.4635  |          | <b>935.5057</b>  | <b>918.4792</b>  |
| 7  | <b>110.0713</b> | <b>737.3729</b>  | 720.3464        | 719.3624       | <b>765.3679</b>  | 748.3413        | 747.3573       |           |          | H    | 756.3999        |           |          | 838.4530         | 821.4264         |
| 8  | 30.0338         | <b>794.3944</b>  | 777.3679        | 776.3838       | <b>822.3893</b>  | 805.3628        | 804.3787       |           |          | G    |                 |           |          | <b>701.3941</b>  | 684.3675         |
| 9  | 86.0964         | <b>907.4785</b>  | 890.4519        | 889.4679       | <b>935.4734</b>  | <b>918.4468</b> | 917.4628       | 879.4472  | 893.4628 | I    | 586.2944        | 599.3148  | 613.3304 | <b>644.3726</b>  | 627.3461         |
| 10 | <b>101.0709</b> | 1035.5370        | 1018.5105       | 1017.5265      | <b>1063.5320</b> | 1046.5054       | 1045.5214      | 978.5156  |          | Q    | <b>458.2358</b> | 457.2405  |          | <b>531.2885</b>  | 514.2620         |
| 11 | 72.0808         | 1134.6055        | 1117.5789       | 1116.5949      | <b>1162.6004</b> | 1145.5738       | 1144.5898      | 1120.5898 |          | V    | 359.1674        | 372.1878  |          | 403.2300         | 386.2034         |
| 12 | 102.0550        | <b>1263.6480</b> | 1246.6215       | 1245.6375      | <b>1291.6430</b> | 1274.6164       | 1273.6324      | 1205.6426 |          | E    | 230.1248        | 229.1295  |          | <b>304.1615</b>  | 287.1350         |
| 13 | 129.1135        |                  |                 |                |                  |                 |                |           |          | R    | 74.0237         | 73.0284   |          | <b>175.1190</b>  | 158.0924         |

| Seq   | ya       | yb              | Seq    | ya              | yb              | Seq     | ya              | yb              |
|-------|----------|-----------------|--------|-----------------|-----------------|---------|-----------------|-----------------|
| FQ    | 248.1394 | 276.1343        | FQG    | 305.1608        | 333.1557        | FQGP    | 402.2136        | 430.2085        |
| FQPPP | 499.2663 | 527.2613        | FQPPH  | 636.3253        | 664.3202        | FQPPHG  | 693.3467        | 721.3416        |
| QG    | 158.0924 | <b>186.0873</b> | QGP    | 255.1452        | 283.1401        | QGPP    | 352.1979        | 380.1928        |
| QGPPH | 489.2568 | 517.2518        | QGPPHG | 546.2783        | 574.2732        | QGPPHGI | 659.3624        | 687.3573        |
| GP    | 127.0866 | 155.0815        | GPP    | 224.1394        | 252.1343        | GPPH    | <b>361.1983</b> | <b>389.1932</b> |
| GPPHG | 418.2197 | 446.2146        | GPPHGI | <b>531.3038</b> | <b>559.2987</b> | GPPHGIQ | 659.3624        | 687.3573        |
| PP    | 167.1179 | 195.1128        | PPH    | <b>304.1768</b> | <b>332.1717</b> | PPHG    | <b>361.1983</b> | <b>389.1932</b> |
| PPHGI | 474.2823 | <b>502.2772</b> | PPHGIQ | 602.3409        | <b>630.3358</b> | PH      | 207.1240        | 235.1190        |

|                        |          |          |                       |          |          |                        |          |          |
|------------------------|----------|----------|-----------------------|----------|----------|------------------------|----------|----------|
| <a href="#">PHG</a>    | 264.1455 | 292.1404 | <a href="#">PHGI</a>  | 377.2296 | 405.2245 | <a href="#">PHGIQ</a>  | 505.2881 | 533.2831 |
| <a href="#">PHGIQV</a> | 604.3566 | 632.3515 | <a href="#">HG</a>    | 167.0927 | 195.0877 | <a href="#">HGI</a>    | 280.1768 | 308.1717 |
| <a href="#">HGIQ</a>   | 408.2354 | 436.2303 | <a href="#">HGIQV</a> | 507.3038 | 535.2987 | <a href="#">HGIQVE</a> | 636.3464 | 664.3413 |
| <a href="#">GI</a>     | 143.1179 | 171.1128 | <a href="#">GIQ</a>   | 271.1765 | 299.1714 | <a href="#">GIQV</a>   | 370.2449 | 398.2398 |
| <a href="#">GIQVE</a>  | 499.2875 | 527.2824 | <a href="#">IQ</a>    | 214.1550 | 242.1499 | <a href="#">IQV</a>    | 313.2234 | 341.2183 |
| <a href="#">IQVE</a>   | 442.2660 | 470.2609 | <a href="#">QV</a>    | 200.1394 | 228.1343 | <a href="#">QVE</a>    | 329.1819 | 357.1769 |
| <a href="#">VE</a>     | 201.1234 | 229.1183 |                       |          |          |                        |          |          |

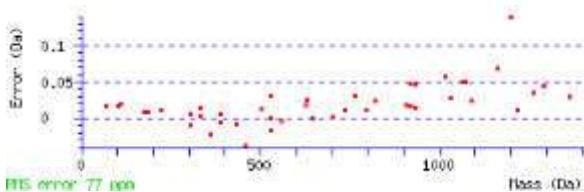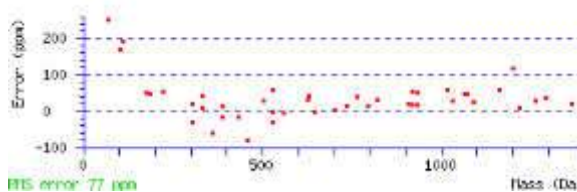

NCBI BLAST search of [TFOGPPHGIOVER](#)

(Parameters: blastp, nr protein database, expect=20000, no filter, PAM30)

Other BLAST [web gateways](#)

All matches to this query

| Score | Mr(calc)  | Delta  | Sequence                      |
|-------|-----------|--------|-------------------------------|
| 100.3 | 1464.7838 | 0.0974 | <a href="#">TFKGPPHGIOVER</a> |
| 100.3 | 1464.7838 | 0.0974 | <a href="#">TFKGPPHGIOVER</a> |
| 100.3 | 1464.7838 | 0.0974 | <a href="#">TFOGPPHGKVER</a>  |
| 100.3 | 1464.7838 | 0.0974 | <a href="#">TFOGPPHGKVER</a>  |
| 100.3 | 1464.7474 | 0.1337 | <a href="#">TFOGPPHGIOVER</a> |
| 100.3 | 1464.7474 | 0.1337 | <a href="#">TFOGPPHGIOVER</a> |
| 100.3 | 1464.7474 | 0.1337 | <a href="#">TFOGPPHGIOVER</a> |
| 100.3 | 1464.7474 | 0.1337 | <a href="#">TFOGPPHGIOVER</a> |
| 100.3 | 1464.7474 | 0.1337 | <a href="#">TFOGPPHGIOVER</a> |
| 100.3 | 1464.7474 | 0.1337 | <a href="#">TFOGPPHGIOVER</a> |

Mascot: <http://www.matrixscience.com/>

**MATRIX SCIENCE Mascot Search Results**

**Peptide View Spot no 138**

**MS/MS Fragmentation of YGRPLLGCTIKPK**

Found in **gi|11466795** in **NCBI**nr, ribulose-1,5-bisphosphate carboxylase/oxygenase large subunit [Oryza sativa Japonica Group]

Match to Query 42: 1501.975524 from(1502.982800,1+) intensity(0.0000) index(13)

Title: Label: F12, Spot\_Id: 216658, Peak\_List\_Id: 221782, MSMS Job\_Run\_Id: 21391, Comment:

Data file C:\Documents and Settings\Administrator\Desktop\farah BHU\Cotton leaves\RAJESH\12-1-13 raj\ppw\_F12\_136117698300.txt

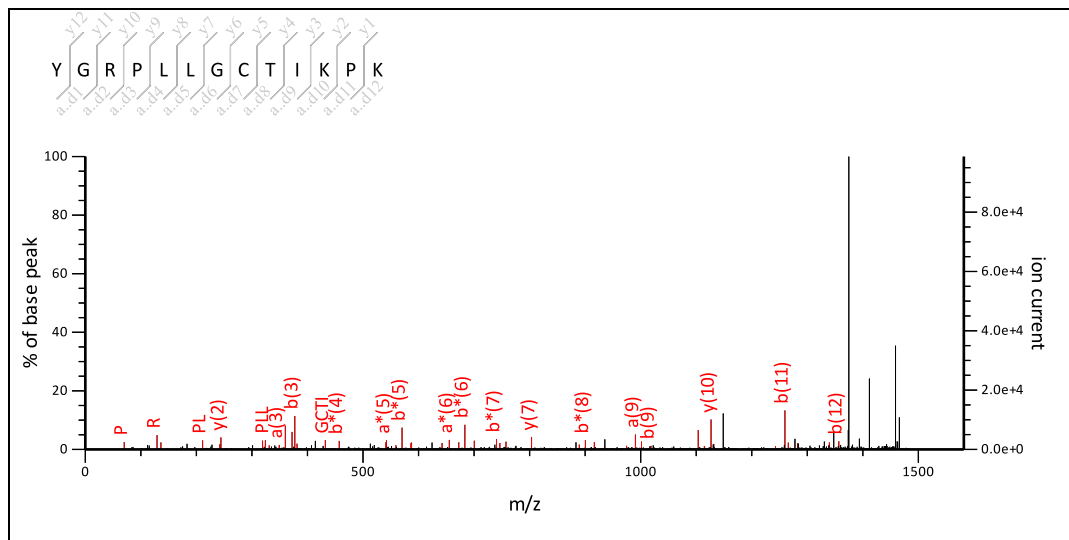

Navigation icons: Home, Back, Forward, Search, Print, Refresh, Stop. Search range: 0 to 1581.87.

Label all possible matches  Label matches used for scoring

Monoisotopic mass of neutral peptide Mr(calc): 1501.8439

Fixed modifications: Carbamidomethyl (C) (apply to specified residues or termini only)

Ions Score: 46 Expect: 0.14

Matches : 54/211 fragment ions using 88 most intense peaks [\(help\)](#)

| #  | Immon.   | a         | a*        | a <sup>0</sup> | b         | b*        | b <sup>0</sup> | d         | d'        | Seq. | v         | w         | w'       | y         | y*        |
|----|----------|-----------|-----------|----------------|-----------|-----------|----------------|-----------|-----------|------|-----------|-----------|----------|-----------|-----------|
| 1  | 136.0757 | 136.0757  |           |                | 164.0706  |           |                | 44.0495   |           | Y    |           |           |          |           |           |
| 2  | 30.0338  | 193.0972  |           |                | 221.0921  |           |                |           |           | G    |           |           |          | 1339.7879 | 1322.7613 |
| 3  | 129.1135 | 349.1983  | 332.1717  |                | 377.1932  | 360.1666  |                | 264.1343  |           | R    | 1181.6711 | 1180.6758 |          | 1282.7664 | 1265.7398 |
| 4  | 70.0651  | 446.2510  | 429.2245  |                | 474.2459  | 457.2194  |                | 420.2354  |           | P    | 1084.6183 | 1083.6231 |          | 1126.6653 | 1109.6387 |
| 5  | 86.0964  | 559.3351  | 542.3085  |                | 587.3300  | 570.3035  |                | 517.2881  |           | L    | 971.5343  | 970.5390  |          | 1029.6125 | 1012.5860 |
| 6  | 86.0964  | 672.4192  | 655.3926  |                | 700.4141  | 683.3875  |                | 630.3722  |           | L    | 858.4502  | 857.4550  |          | 916.5285  | 899.5019  |
| 7  | 30.0338  | 729.4406  | 712.4141  |                | 757.4355  | 740.4090  |                |           |           | G    |           |           |          | 803.4444  | 786.4178  |
| 8  | 133.0430 | 889.4713  | 872.4447  |                | 917.4662  | 900.4396  |                | 800.4777  |           | C    | 641.3981  | 640.4028  |          | 746.4229  | 729.3964  |
| 9  | 74.0600  | 990.5189  | 973.4924  | 972.5084       | 1018.5139 | 1001.4873 | 1000.5033      | 974.5240  | 976.5033  | T    | 540.3504  | 553.3708  | 555.3501 | 586.3923  | 569.3657  |
| 10 | 86.0964  | 1103.6030 | 1086.5765 | 1085.5924      | 1131.5979 | 1114.5714 | 1113.5874      | 1075.5717 | 1089.5874 | I    | 427.2663  | 440.2867  | 454.3024 | 485.3446  | 468.3180  |
| 11 | 101.1073 | 1231.6980 | 1214.6714 | 1213.6874      | 1259.6929 | 1242.6663 | 1241.6823      | 1174.6401 |           | K    | 299.1714  | 298.1761  |          | 372.2605  | 355.2340  |
| 12 | 70.0651  | 1328.7507 | 1311.7242 | 1310.7402      | 1356.7457 | 1339.7191 | 1338.7351      | 1302.7351 |           | P    | 202.1186  | 201.1234  |          | 244.1656  | 227.1390  |
| 13 | 101.1073 |           |           |                |           |           |                |           |           | K    | 74.0237   | 73.0284   |          | 147.1128  | 130.0863  |

| Seq    | ya       | yb       | Seq    | ya       | yb       | Seq    | ya       | yb       |
|--------|----------|----------|--------|----------|----------|--------|----------|----------|
| GR     | 186.1349 | 214.1299 | GRP    | 283.1877 | 311.1826 | GRPL   | 396.2718 | 424.2667 |
| GRPLL  | 509.3558 | 537.3507 | GRPLL  | 566.3773 | 594.3722 | RP     | 226.1662 | 254.1612 |
| RPL    | 339.2503 | 367.2452 | RPLL   | 452.3344 | 480.3293 | RPLL   | 509.3558 | 537.3507 |
| RPLLGC | 669.3865 | 697.3814 | PL     | 183.1492 | 211.1441 | PLL    | 296.2333 | 324.2282 |
| PLLGC  | 353.2547 | 381.2496 | PLLGC  | 513.2854 | 541.2803 | PLLGCT | 614.3330 | 642.3280 |
| LL     | 199.1805 | 227.1754 | LLG    | 256.2020 | 284.1969 | LLGC   | 416.2326 | 444.2275 |
| LLGCT  | 517.2803 | 545.2752 | LLGCTI | 630.3643 | 658.3593 | LG     | 143.1179 | 171.1128 |
| LGC    | 303.1485 | 331.1435 | LGCT   | 404.1962 | 432.1911 | LGCTI  | 517.2803 | 545.2752 |

|               |          |                 |              |          |                 |               |          |                 |
|---------------|----------|-----------------|--------------|----------|-----------------|---------------|----------|-----------------|
| <b>LGCTIK</b> | 645.3752 | 673.3702        | <b>GC</b>    | 190.0645 | 218.0594        | <b>GCT</b>    | 291.1122 | <b>319.1071</b> |
| <b>GCTI</b>   | 404.1962 | <b>432.1911</b> | <b>GCTIK</b> | 532.2912 | 560.2861        | <b>GCTIKP</b> | 629.3439 | 657.3389        |
| <b>CT</b>     | 234.0907 | 262.0856        | <b>CTI</b>   | 347.1748 | 375.1697        | <b>CTIK</b>   | 475.2697 | 503.2646        |
| <b>CTIKP</b>  | 572.3225 | 600.3174        | <b>TI</b>    | 187.1441 | 215.1390        | <b>TIK</b>    | 315.2391 | 343.2340        |
| <b>TIKP</b>   | 412.2918 | 440.2867        | <b>IK</b>    | 214.1914 | <b>242.1863</b> | <b>IKP</b>    | 311.2442 | 339.2391        |
| <b>KP</b>     | 198.1601 | 226.1550        |              |          |                 |               |          |                 |

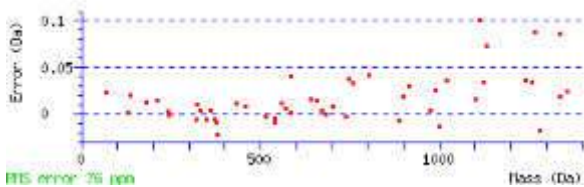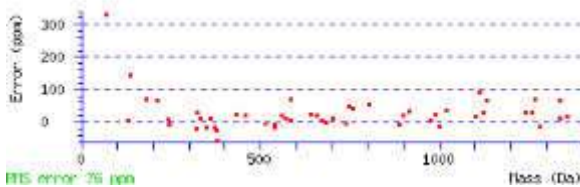

NCBI BLAST search of [YGRPLLGCTIKPK](#)

(Parameters: blastp, nr protein database, expect=20000, no filter, PAM30)

Other BLAST [web gateways](#)

All matches to this query

| Score | Mr(calc)  | Delta  | Sequence                      |
|-------|-----------|--------|-------------------------------|
| 46.4  | 1501.8439 | 0.1316 | <a href="#">YGRPILGCTIKPK</a> |
| 46.4  | 1501.8439 | 0.1316 | <a href="#">YGRPILGCTIKPK</a> |
| 46.4  | 1501.8439 | 0.1316 | <a href="#">YGRPLIGCTIKPK</a> |
| 46.4  | 1501.8439 | 0.1316 | <a href="#">YGRPLLGCTIKPK</a> |
| 46.4  | 1501.8439 | 0.1316 | <a href="#">YGRPLIGCTIKPK</a> |
| 46.4  | 1501.8439 | 0.1316 | <a href="#">YGRPLLGCTIKPK</a> |
| 46.4  | 1501.8439 | 0.1316 | <a href="#">YGRPLLGCTIKPK</a> |
| 46.4  | 1501.8439 | 0.1316 | <a href="#">YGRPLLGCTIKPK</a> |
| 46.4  | 1501.8439 | 0.1316 | <a href="#">YGRPLLGCTIKPK</a> |
| 46.4  | 1501.8439 | 0.1316 | <a href="#">YGRPLLGCTIKPK</a> |
| 46.4  | 1501.8439 | 0.1316 | <a href="#">YGRPLLGCTIKPK</a> |

Mascot: <http://www.matrixscience.com/>

**MATRIX SCIENCE Mascot Search Results**

**Peptide View Spot no 138**

MS/MS Fragmentation of **DRFVFCAEAIYK**

Found in **gi|11466795** in **NCBIInr**, ribulose-1,5-bisphosphate carboxylase/oxygenase large subunit [Oryza sativa Japonica Group]

Match to Query 45: 1517.880924 from(1518.888200,1+) intensity(0.0000) index(14)

Title: Label: F12, Spot\_Id: 216658, Peak\_List\_Id: 221787, MSMS Job\_Run\_Id: 21391, Comment:

Data file C:\Documents and Settings\Administrator\Desktop\farah BHU\Cotton leaves\RAJESH\12-1-13 raj\ppw\_F12\_136117698300.txt

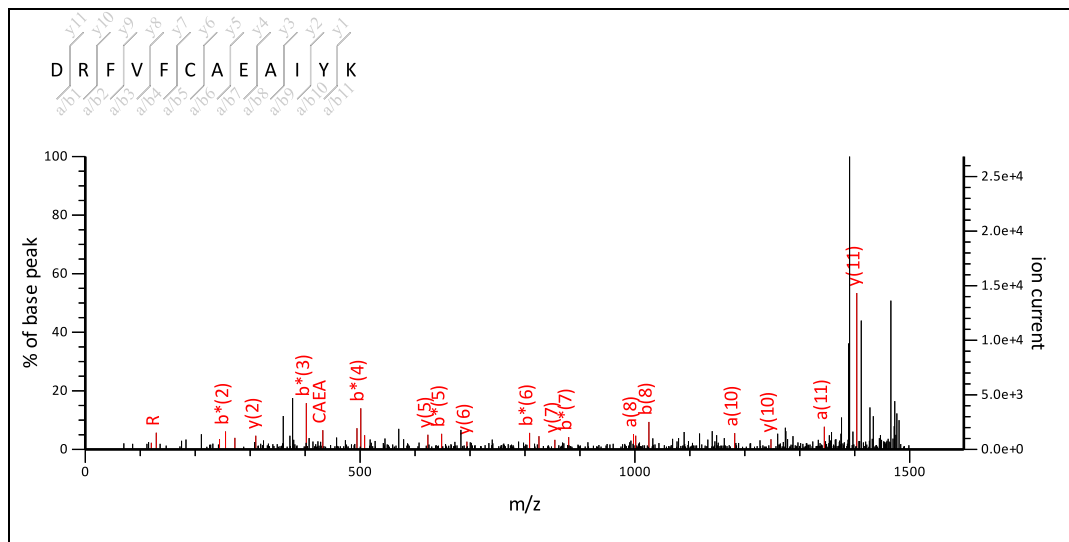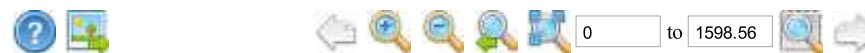

Label all possible matches  Label matches used for scoring

Monoisotopic mass of neutral peptide Mr(calc): 1517.7337

Fixed modifications: Carbamidomethyl (C) (apply to specified residues or termini only)

Ions Score: 42 Expect: 0.34

Matches : 28/194 fragment ions using 45 most intense peaks ([help](#))

| #  | Immon.   | a         | a*        | a <sup>0</sup> | b         | b*        | b <sup>0</sup> | d         | d'        | Seq. | v         | w         | w'       | y         | y*        |
|----|----------|-----------|-----------|----------------|-----------|-----------|----------------|-----------|-----------|------|-----------|-----------|----------|-----------|-----------|
| 1  | 88.0393  | 88.0393   |           | 70.0287        | 116.0342  |           | 98.0237        | 44.0495   |           | D    |           |           |          |           |           |
| 2  | 129.1135 | 244.1404  | 227.1139  | 226.1299       | 272.1353  | 255.1088  | 254.1248       | 159.0764  |           | R    | 1302.6187 | 1301.6235 |          | 1403.7140 | 1386.6875 |
| 3  | 120.0808 | 391.2088  | 374.1823  | 373.1983       | 419.2037  | 402.1772  | 401.1932       |           |           | F    | 1155.5503 |           |          | 1247.6129 | 1230.5864 |
| 4  | 72.0808  | 490.2772  | 473.2507  | 472.2667       | 518.2722  | 501.2456  | 500.2616       | 476.2616  |           | V    | 1056.4819 | 1069.5023 |          | 1100.5445 | 1083.5179 |
| 5  | 120.0808 | 637.3457  | 620.3191  | 619.3351       | 665.3406  | 648.3140  | 647.3300       |           |           | F    | 909.4135  |           |          | 1001.4761 | 984.4495  |
| 6  | 133.0430 | 797.3763  | 780.3498  | 779.3657       | 825.3712  | 808.3447  | 807.3607       | 708.3828  |           | C    | 749.3828  | 748.3876  |          | 854.4077  | 837.3811  |
| 7  | 44.0495  | 868.4134  | 851.3869  | 850.4029       | 896.4083  | 879.3818  | 878.3978       |           |           | A    | 678.3457  |           |          | 694.3770  | 677.3505  |
| 8  | 102.0550 | 997.4560  | 980.4295  | 979.4454       | 1025.4509 | 1008.4244 | 1007.4404      | 939.4505  |           | E    | 549.3031  | 548.3079  |          | 623.3399  | 606.3134  |
| 9  | 44.0495  | 1068.4931 | 1051.4666 | 1050.4826      | 1096.4880 | 1079.4615 | 1078.4775      |           |           | A    | 478.2660  |           |          | 494.2973  | 477.2708  |
| 10 | 86.0964  | 1181.5772 | 1164.5506 | 1163.5666      | 1209.5721 | 1192.5456 | 1191.5615      | 1153.5459 | 1167.5615 | I    | 365.1819  | 378.2023  | 392.2180 | 423.2602  | 406.2336  |
| 11 | 136.0757 | 1344.6405 | 1327.6140 | 1326.6300      | 1372.6354 | 1355.6089 | 1354.6249      |           |           | Y    | 202.1186  |           |          | 310.1761  | 293.1496  |
| 12 | 101.1073 |           |           |                |           |           |                |           |           | K    | 74.0237   | 73.0284   |          | 147.1128  | 130.0863  |

| Seq    | ya       | yb       | Seq    | ya       | yb       | Seq    | ya       | yb       |
|--------|----------|----------|--------|----------|----------|--------|----------|----------|
| RF     | 276.1819 | 304.1768 | RFV    | 375.2503 | 403.2452 | RFVF   | 522.3187 | 550.3136 |
| RFVFC  | 682.3494 | 710.3443 | FV     | 219.1492 | 247.1441 | FVF    | 366.2176 | 394.2125 |
| FVFC   | 526.2483 | 554.2432 | FVFC   | 597.2854 | 625.2803 | VF     | 219.1492 | 247.1441 |
| VFC    | 379.1798 | 407.1748 | VFC    | 450.2170 | 478.2119 | VFCAE  | 579.2595 | 607.2545 |
| VFCAEA | 650.2967 | 678.2916 | FC     | 280.1114 | 308.1063 | FCA    | 351.1485 | 379.1435 |
| FCAE   | 480.1911 | 508.1860 | FCAEA  | 551.2282 | 579.2232 | FCAEAI | 664.3123 | 692.3072 |
| CA     | 204.0801 | 232.0750 | CAE    | 333.1227 | 361.1176 | CAEA   | 404.1598 | 432.1547 |
| CAEAI  | 517.2439 | 545.2388 | CAEAIY | 680.3072 | 708.3021 | AE     | 173.0921 | 201.0870 |
| AEA    | 244.1292 | 272.1241 | AEAI   | 357.2132 | 385.2082 | AEAIY  | 520.2766 | 548.2715 |

|                    |          |          |                     |          |          |                      |          |          |
|--------------------|----------|----------|---------------------|----------|----------|----------------------|----------|----------|
| <a href="#">EA</a> | 173.0921 | 201.0870 | <a href="#">EAI</a> | 286.1761 | 314.1710 | <a href="#">EAIY</a> | 449.2395 | 477.2344 |
| <a href="#">AI</a> | 157.1335 | 185.1285 | <a href="#">AIY</a> | 320.1969 | 348.1918 | <a href="#">IY</a>   | 249.1598 | 277.1547 |

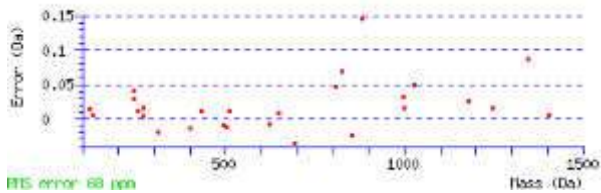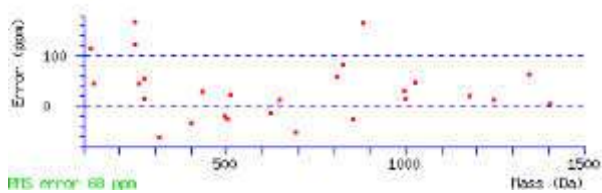

NCBI BLAST search of [DRFVFCAEAIYK](#)

(Parameters: blastp, nr protein database, expect=20000, no filter, PAM30)

Other BLAST [web gateways](#)

All matches to this query

| Score | Mr(calc)  | Delta  | Sequence                     |
|-------|-----------|--------|------------------------------|
| 43.3  | 1517.7007 | 0.1803 | <a href="#">DRFVMCAEAIYK</a> |
| 43.3  | 1517.7007 | 0.1803 | <a href="#">DRMVFCAEALYK</a> |
| 42.0  | 1517.7337 | 0.1473 | <a href="#">DRFVFCAEAIYK</a> |
| 42.0  | 1517.7337 | 0.1473 | <a href="#">DRFVFCAEAIYK</a> |
| 42.0  | 1517.7337 | 0.1473 | <a href="#">DRFVFCAEAIYK</a> |
| 42.0  | 1517.7337 | 0.1473 | <a href="#">DRFVFCAEAIYK</a> |
| 42.0  | 1517.7337 | 0.1473 | <a href="#">DRFVFCAEAIYK</a> |
| 42.0  | 1517.7337 | 0.1473 | <a href="#">DRFVFCAEAIYK</a> |
| 42.0  | 1517.7337 | 0.1473 | <a href="#">DRFVFCAEAIYK</a> |
| 42.0  | 1517.7337 | 0.1473 | <a href="#">DRFVFCAEAIYK</a> |
| 42.0  | 1517.7337 | 0.1473 | <a href="#">DRFVFCAEAIYK</a> |

Mascot: <http://www.matrixscience.com/>


**Mascot Search Results**
**Peptide View**    **Spot no 138**
MS/MS Fragmentation of **WSPELAAACEIWK**Found in **gi11466795** in **NCBI**nr, ribulose-1,5-bisphosphate carboxylase/oxygenase large subunit [Oryza sativa Japonica Group]

Match to Query 48: 1559.877824 from(1560.885100,1+) intensity(0.0000) index(15)

Title: Label: F12, Spot\_Id: 216658, Peak\_List\_Id: 221798, MSMS Job\_Run\_Id: 21391, Comment:

Data file C:\Documents and Settings\Administrator\Desktop\farah BHU\Cotton leaves\RAJESH\12-1-13 raj\ppw\_F12\_136117698300.txt

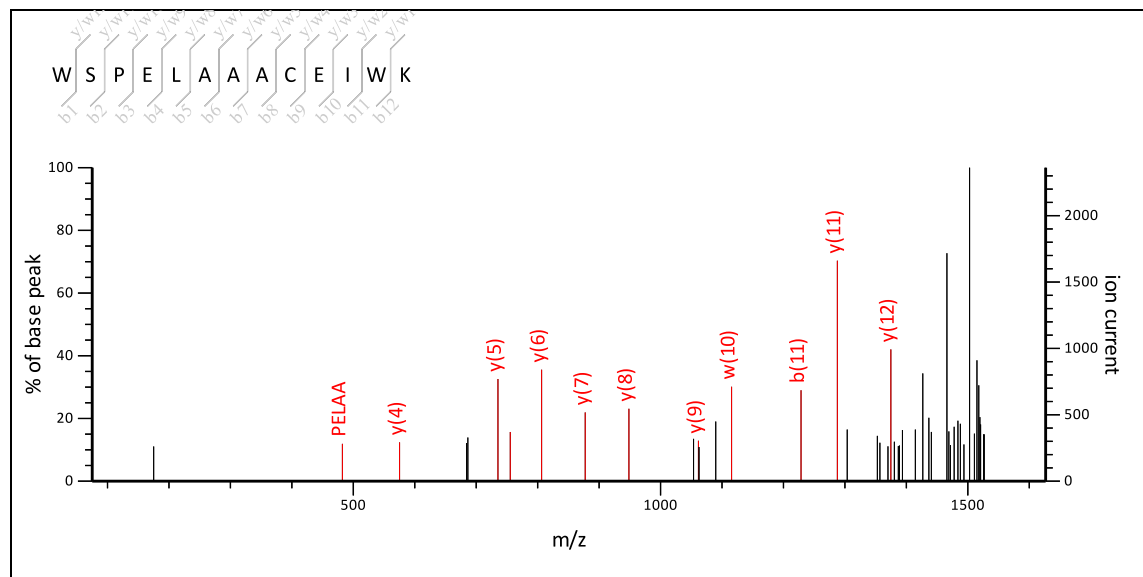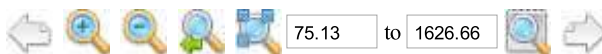Label all possible matches  Label matches used for scoring Monoisotopic mass of neutral peptide **Mr(calc)**: 1559.7442**Fixed modifications**: Carbamidomethyl (C) (apply to specified residues or termini only)**Ions Score**: 55    **Expect**: 0.016**Matches**: 14/203 fragment ions using 19 most intense peaks ([help](#))

| #  | Immon.   | a         | a <sup>0</sup> | b         | b <sup>0</sup> | d         | d'        | Seq. | v         | w         | w'       | y         | y*        | y <sup>0</sup> | #  |
|----|----------|-----------|----------------|-----------|----------------|-----------|-----------|------|-----------|-----------|----------|-----------|-----------|----------------|----|
| 1  | 159.0917 | 159.0917  |                | 187.0866  |                | 44.0495   |           | W    |           |           |          |           |           |                | 13 |
| 2  | 60.0444  | 246.1237  | 228.1131       | 274.1186  | 256.1081       | 230.1288  |           | S    | 1342.6460 | 1341.6508 |          | 1374.6722 | 1357.6457 | 1356.6616      | 12 |
| 3  | 70.0651  | 343.1765  | 325.1659       | 371.1714  | 353.1608       | 317.1608  |           | P    | 1245.5932 | 1244.5980 |          | 1287.6402 | 1270.6136 | 1269.6296      | 11 |
| 4  | 102.0550 | 472.2191  | 454.2085       | 500.2140  | 482.2034       | 414.2136  |           | E    | 1116.5506 | 1115.5554 |          | 1190.5874 | 1173.5609 | 1172.5769      | 10 |
| 5  | 86.0964  | 585.3031  | 567.2926       | 613.2980  | 595.2875       | 543.2562  |           | L    | 1003.4666 | 1002.4713 |          | 1061.5448 | 1044.5183 | 1043.5343      | 9  |
| 6  | 44.0495  | 656.3402  | 638.3297       | 684.3352  | 666.3246       |           |           | A    | 932.4295  |           |          | 948.4608  | 931.4342  | 930.4502       | 8  |
| 7  | 44.0495  | 727.3774  | 709.3668       | 755.3723  | 737.3617       |           |           | A    | 861.3924  |           |          | 877.4237  | 860.3971  | 859.4131       | 7  |
| 8  | 44.0495  | 798.4145  | 780.4039       | 826.4094  | 808.3988       |           |           | A    | 790.3552  |           |          | 806.3865  | 789.3600  | 788.3760       | 6  |
| 9  | 133.0430 | 958.4451  | 940.4345       | 986.4400  | 968.4295       | 869.4516  |           | C    | 630.3246  | 629.3293  |          | 735.3494  | 718.3229  | 717.3389       | 5  |
| 10 | 102.0550 | 1087.4877 | 1069.4771      | 1115.4826 | 1097.4721      | 1029.4822 |           | E    | 501.2820  | 500.2867  |          | 575.3188  | 558.2922  | 557.3082       | 4  |
| 11 | 86.0964  | 1200.5718 | 1182.5612      | 1228.5667 | 1210.5561      | 1172.5405 | 1186.5561 | I    | 388.1979  | 401.2183  | 415.2340 | 446.2762  | 429.2496  |                | 3  |
| 12 | 159.0917 | 1386.6511 | 1368.6405      | 1414.6460 | 1396.6354      |           |           | W    | 202.1186  |           |          | 333.1921  | 316.1656  |                | 2  |
| 13 | 101.1073 |           |                |           |                |           |           | K    | 74.0237   | 73.0284   |          | 147.1128  | 130.0863  |                | 1  |

| Seq   | ya       | yb       | Seq    | ya       | yb       | Seq     | ya       | yb       |
|-------|----------|----------|--------|----------|----------|---------|----------|----------|
| SP    | 157.0972 | 185.0921 | SPE    | 286.1397 | 314.1347 | SPEL    | 399.2238 | 427.2187 |
| SPELA | 470.2609 | 498.2558 | SPELAA | 541.2980 | 569.2930 | SPELAAA | 612.3352 | 640.3301 |
| PE    | 199.1077 | 227.1026 | PEL    | 312.1918 | 340.1867 | PELA    | 383.2289 | 411.2238 |
| PELAA | 454.2660 | 482.2609 | PELAAA | 525.3031 | 553.2980 | PELAAAC | 685.3338 | 713.3287 |



|               |          |          |               |          |          |               |          |          |
|---------------|----------|----------|---------------|----------|----------|---------------|----------|----------|
| <b>EL</b>     | 215.1390 | 243.1339 | <b>ELA</b>    | 286.1761 | 314.1710 | <b>ELAA</b>   | 357.2132 | 385.2082 |
| <b>ELAAA</b>  | 428.2504 | 456.2453 | <b>ELAAAC</b> | 588.2810 | 616.2759 | <b>LA</b>     | 157.1335 | 185.1285 |
| <b>LAA</b>    | 228.1707 | 256.1656 | <b>LAAA</b>   | 299.2078 | 327.2027 | <b>LAAAC</b>  | 459.2384 | 487.2333 |
| <b>LAAACE</b> | 588.2810 | 616.2759 | <b>AA</b>     | 115.0866 | 143.0815 | <b>AAA</b>    | 186.1237 | 214.1186 |
| <b>AAAC</b>   | 346.1544 | 374.1493 | <b>AAACE</b>  | 475.1969 | 503.1919 | <b>AAACEI</b> | 588.2810 | 616.2759 |
| <b>AA</b>     | 115.0866 | 143.0815 | <b>AAC</b>    | 275.1172 | 303.1122 | <b>AAACE</b>  | 404.1598 | 432.1547 |
| <b>AAACEI</b> | 517.2439 | 545.2388 | <b>AC</b>     | 204.0801 | 232.0750 | <b>ACE</b>    | 333.1227 | 361.1176 |
| <b>ACEI</b>   | 446.2068 | 474.2017 | <b>ACEIW</b>  | 632.2861 | 660.2810 | <b>CE</b>     | 262.0856 | 290.0805 |
| <b>CEI</b>    | 375.1697 | 403.1646 | <b>CEIW</b>   | 561.2490 | 589.2439 | <b>EI</b>     | 215.1390 | 243.1339 |
| <b>EIW</b>    | 401.2183 | 429.2132 | <b>IW</b>     | 272.1757 | 300.1707 |               |          |          |

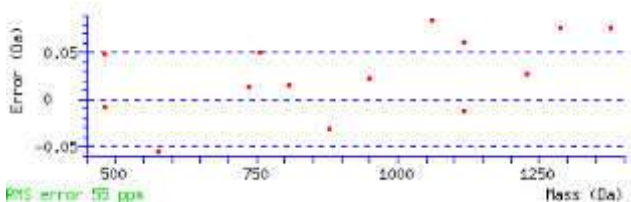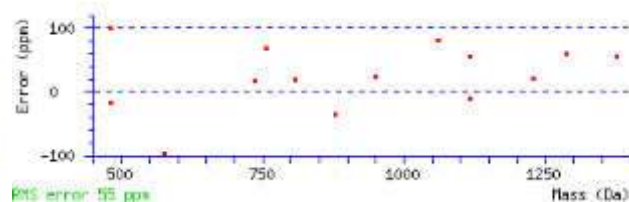

NCBI BLAST search of [WSPELAAACEIWK](#)

(Parameters: blastp, nr protein database, expect=20000, no filter, PAM30)

Other BLAST [web gateways](#)

#### All matches to this query

| Score | Mr(calc)  | Delta  | Sequence                       |
|-------|-----------|--------|--------------------------------|
| 55.1  | 1559.7442 | 0.1336 | <a href="#">WSPEIAAAACEIWK</a> |
| 55.1  | 1559.7442 | 0.1336 | <a href="#">WSPELAAACEIWK</a>  |
| 55.1  | 1559.7442 | 0.1336 | <a href="#">WSPELAAACEIWK</a>  |
| 55.1  | 1559.7442 | 0.1336 | <a href="#">WSPELAAACEIWK</a>  |
| 55.1  | 1559.7442 | 0.1336 | <a href="#">WSPELAAACEIWK</a>  |
| 55.1  | 1559.7442 | 0.1336 | <a href="#">WSPELAAACEIWK</a>  |
| 55.1  | 1559.7442 | 0.1336 | <a href="#">WSPELAAACEIWK</a>  |
| 55.1  | 1559.7442 | 0.1336 | <a href="#">WSPELAAACEIWK</a>  |
| 55.1  | 1559.7442 | 0.1336 | <a href="#">WSPELAAACEIWK</a>  |
| 55.1  | 1559.7442 | 0.1336 | <a href="#">WSPELAAACEIWK</a>  |
| 55.1  | 1559.7442 | 0.1336 | <a href="#">WSPELAAACEIWK</a>  |

Mascot: <http://www.matrixscience.com/>

**MATRIX SCIENCE Mascot Search Results**

**Peptide View Spot no 138**

MS/MS Fragmentation of **TFQPPHGIQVERDK**

Found in **gi|11466795** in **NCBI**nr, ribulose-1,5-bisphosphate carboxylase/oxygenase large subunit [Oryza sativa Japonica Group]

Match to Query 52: 1708.021624 from(1709.028900,1+) intensity(0.0000) index(17)

Title: Label: F12, Spot\_Id: 216658, Peak\_List\_Id: 221792, MSMS Job\_Run\_Id: 21391, Comment:

Data file C:\Documents and Settings\Administrator\Desktop\farah BHU\Cotton leaves\RAJESH\12-1-13 raj\ppw\_F12\_136117698300.txt

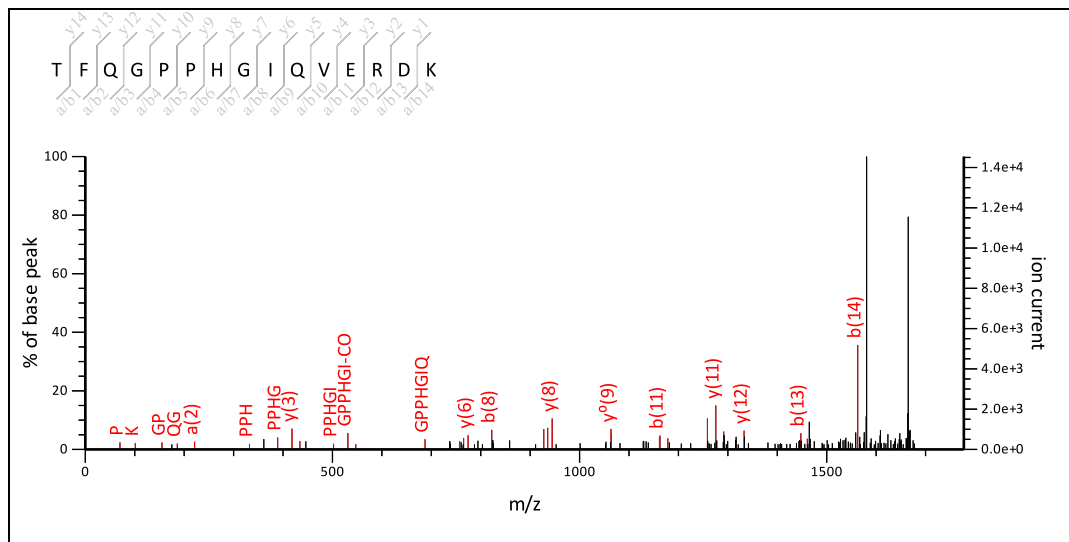

Navigation icons: Home, Back, Forward, Search, Print, Refresh, Stop. Range: 0 to 1777.44

Label all possible matches  Label matches used for scoring

Monoisotopic mass of neutral peptide Mr(calc): 1707.8693  
 Fixed modifications: Carbamidomethyl (C) (apply to specified residues or termini only)  
 Ions Score: 72 Expect: 0.00033  
 Matches : 44/273 fragment ions using 46 most intense peaks (help)

| #  | Immon.   | a         | a*        | a <sup>0</sup> | b         | b*        | b <sup>0</sup> | d         | d'       | Seq. | v         | w         | w'       | y         | y*        |
|----|----------|-----------|-----------|----------------|-----------|-----------|----------------|-----------|----------|------|-----------|-----------|----------|-----------|-----------|
| 1  | 74.0600  | 74.0600   |           | 56.0495        | 102.0550  |           | 84.0444        | 44.0495   |          | T    |           |           |          |           |           |
| 2  | 120.0808 | 221.1285  |           | 203.1179       | 249.1234  |           | 231.1128       |           |          | F    | 1515.7663 |           |          | 1607.8289 | 1590.8023 |
| 3  | 101.0709 | 349.1870  | 332.1605  | 331.1765       | 377.1819  | 360.1554  | 359.1714       | 292.1656  |          | Q    | 1387.7077 | 1386.7124 |          | 1460.7605 | 1443.7339 |
| 4  | 30.0338  | 406.2085  | 389.1819  | 388.1979       | 434.2034  | 417.1769  | 416.1928       |           |          | G    |           |           |          | 1332.7019 | 1315.6753 |
| 5  | 70.0651  | 503.2613  | 486.2347  | 485.2507       | 531.2562  | 514.2296  | 513.2456       | 477.2456  |          | P    | 1233.6335 | 1232.6382 |          | 1275.6804 | 1258.6539 |
| 6  | 70.0651  | 600.3140  | 583.2875  | 582.3035       | 628.3089  | 611.2824  | 610.2984       | 574.2984  |          | P    | 1136.5807 | 1135.5854 |          | 1178.6276 | 1161.6011 |
| 7  | 110.0713 | 737.3729  | 720.3464  | 719.3624       | 765.3679  | 748.3413  | 747.3573       |           |          | H    | 999.5218  |           |          | 1081.5749 | 1064.5483 |
| 8  | 30.0338  | 794.3944  | 777.3679  | 776.3838       | 822.3893  | 805.3628  | 804.3787       |           |          | G    |           |           |          | 944.5160  | 927.4894  |
| 9  | 86.0964  | 907.4785  | 890.4519  | 889.4679       | 935.4734  | 918.4468  | 917.4628       | 879.4472  | 893.4628 | I    | 829.4163  | 842.4367  | 856.4523 | 887.4945  | 870.4680  |
| 10 | 101.0709 | 1035.5370 | 1018.5105 | 1017.5265      | 1063.5320 | 1046.5054 | 1045.5214      | 978.5156  |          | Q    | 701.3577  | 700.3624  |          | 774.4104  | 757.3839  |
| 11 | 72.0808  | 1134.6055 | 1117.5789 | 1116.5949      | 1162.6004 | 1145.5738 | 1144.5898      | 1120.5898 |          | V    | 602.2893  | 615.3097  |          | 646.3519  | 629.3253  |
| 12 | 102.0550 | 1263.6480 | 1246.6215 | 1245.6375      | 1291.6430 | 1274.6164 | 1273.6324      | 1205.6426 |          | E    | 473.2467  | 472.2514  |          | 547.2835  | 530.2569  |
| 13 | 129.1135 | 1419.7492 | 1402.7226 | 1401.7386      | 1447.7441 | 1430.7175 | 1429.7335      | 1334.6852 |          | R    | 317.1456  | 316.1503  |          | 418.2409  | 401.2143  |
| 14 | 88.0393  | 1534.7761 | 1517.7496 | 1516.7655      | 1562.7710 | 1545.7445 | 1544.7605      | 1490.7863 |          | D    | 202.1186  | 201.1234  |          | 262.1397  | 245.1132  |
| 15 | 101.1073 |           |           |                |           |           |                |           |          | K    | 74.0237   | 73.0284   |          | 147.1128  | 130.0863  |

| Seq   | ya       | yb       | Seq    | ya       | yb       | Seq     | ya       | yb       |
|-------|----------|----------|--------|----------|----------|---------|----------|----------|
| FQ    | 248.1394 | 276.1343 | FQG    | 305.1608 | 333.1557 | FQGP    | 402.2136 | 430.2085 |
| FQGP  | 499.2663 | 527.2613 | FQPPH  | 636.3253 | 664.3202 | FQPPHG  | 693.3467 | 721.3416 |
| QG    | 158.0924 | 186.0873 | QGP    | 255.1452 | 283.1401 | QGPP    | 352.1979 | 380.1928 |
| QGP   | 489.2568 | 517.2518 | QPPHG  | 546.2783 | 574.2732 | QPPHGI  | 659.3624 | 687.3573 |
| GP    | 127.0866 | 155.0815 | GPP    | 224.1394 | 252.1343 | GPPH    | 361.1983 | 389.1932 |
| GPPHG | 418.2197 | 446.2146 | GPPHGI | 531.3038 | 559.2987 | GPPHGIQ | 659.3624 | 687.3573 |

|        |          |          |        |          |          |        |          |          |
|--------|----------|----------|--------|----------|----------|--------|----------|----------|
| PP     | 167.1179 | 195.1128 | PPH    | 304.1768 | 332.1717 | PPHG   | 361.1983 | 389.1932 |
| PPHGI  | 474.2823 | 502.2772 | PPHGIQ | 602.3409 | 630.3358 | PH     | 207.1240 | 235.1190 |
| PHG    | 264.1455 | 292.1404 | PHGI   | 377.2296 | 405.2245 | PHGIQ  | 505.2881 | 533.2831 |
| PHGIQV | 604.3566 | 632.3515 | HG     | 167.0927 | 195.0877 | HGI    | 280.1768 | 308.1717 |
| HGIQ   | 408.2354 | 436.2303 | HGIQV  | 507.3038 | 535.2987 | HGIQVE | 636.3464 | 664.3413 |
| GI     | 143.1179 | 171.1128 | GIQ    | 271.1765 | 299.1714 | GIQV   | 370.2449 | 398.2398 |
| GIQVE  | 499.2875 | 527.2824 | GIQVER | 655.3886 | 683.3835 | IQ     | 214.1550 | 242.1499 |
| IQV    | 313.2234 | 341.2183 | IQVE   | 442.2660 | 470.2609 | IQVER  | 598.3671 | 626.3620 |
| QV     | 200.1394 | 228.1343 | QVE    | 329.1819 | 357.1769 | QVER   | 485.2831 | 513.2780 |
| QVERD  | 600.3100 | 628.3049 | VE     | 201.1234 | 229.1183 | VER    | 357.2245 | 385.2194 |
| VERD   | 472.2514 | 500.2463 | ER     | 258.1561 | 286.1510 | ERD    | 373.1830 | 401.1779 |
| RD     | 244.1404 | 272.1353 |        |          |          |        |          |          |

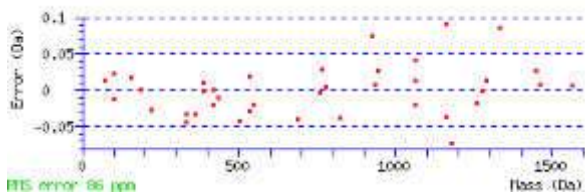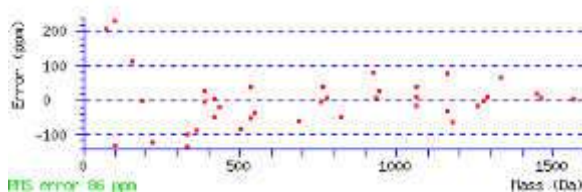

NCBI BLAST search of [TFOGPPHGIQVERDK](#)

(Parameters: blastp, nr protein database, expect=20000, no filter, PAM30)

Other BLAST [web gateways](#)

#### All matches to this query

| Score | Mr(calc)  | Delta  | Sequence                        |
|-------|-----------|--------|---------------------------------|
| 73.2  | 1707.8805 | 0.1411 | <a href="#">TFOGPPHGIQVERS</a>  |
| 72.2  | 1707.8693 | 0.1523 | <a href="#">TFOGPPHGIQVERDK</a> |
| 72.2  | 1707.8693 | 0.1523 | <a href="#">TFOGPPHGIQVERDK</a> |
| 72.2  | 1707.8693 | 0.1523 | <a href="#">TFOGPPHGIQVERDK</a> |
| 72.2  | 1707.8693 | 0.1523 | <a href="#">TFOGPPHGIQVERDK</a> |
| 72.2  | 1707.8693 | 0.1523 | <a href="#">TFOGPPHGIQVERDK</a> |
| 72.2  | 1707.8693 | 0.1523 | <a href="#">TFOGPPHGIQVERDK</a> |
| 72.2  | 1707.8693 | 0.1523 | <a href="#">TFOGPPHGIQVERDK</a> |
| 72.2  | 1707.8693 | 0.1523 | <a href="#">TFOGPPHGIQVERDK</a> |
| 72.2  | 1707.8693 | 0.1523 | <a href="#">TFOGPPHGIQVERDK</a> |

Mascot: <http://www.matrixscience.com/>

**MATRIX SCIENCE Mascot Search Results**

**Peptide View Spot no 138**

MS/MS Fragmentation of **GHYLNATAGTCEEMIKR**

Found in **gi|11466795** in **NCBI**nr, ribulose-1,5-bisphosphate carboxylase/oxygenase large subunit [Oryza sativa Japonica Group]

Match to Query 56: 1950.081824 from(1951.089100,1+) intensity(0.0000) index(19)

Title: Label: F12, Spot\_Id: 216658, Peak\_List\_Id: 221800, MSMS Job\_Run\_Id: 21391, Comment:

Data file C:\Documents and Settings\Administrator\Desktop\farah BHU\Cotton leaves\RAJESH\12-1-13 raj\ppw\_F12\_136117698300.txt

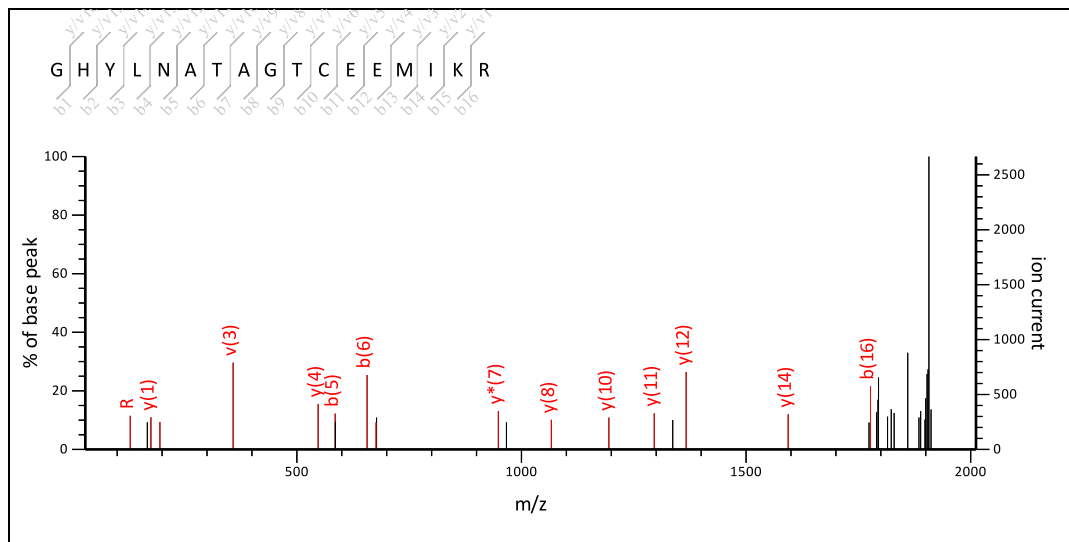

Navigation icons: Home, Back, Forward, Search, and a range selector from 29.1 to 2011.82.

Label all possible matches  Label matches used for scoring

Monoisotopic mass of neutral peptide Mr(calc): 1949.9087

Fixed modifications: Carbamidomethyl (C) (apply to specified residues or termini only)

Ions Score: 51 Expect: 0.034

Matches : 19/302 fragment ions using 24 most intense peaks [\(help\)](#)

| #  | Immon.   | a         | a*        | a <sup>0</sup> | b         | b*        | b <sup>0</sup> | d         | d'        | Seq. | v         | w         | w'        | y         | y*        |
|----|----------|-----------|-----------|----------------|-----------|-----------|----------------|-----------|-----------|------|-----------|-----------|-----------|-----------|-----------|
| 1  | 30.0338  | 30.0338   |           |                | 58.0287   |           |                | 44.0495   |           | G    |           |           |           |           |           |
| 2  | 110.0713 | 167.0927  |           |                | 195.0877  |           |                |           |           | H    | 1811.8415 |           |           | 1893.8946 | 1876.8680 |
| 3  | 136.0757 | 330.1561  |           |                | 358.1510  |           |                |           |           | Y    | 1648.7782 |           |           | 1756.8357 | 1739.8091 |
| 4  | 86.0964  | 443.2401  |           |                | 471.2350  |           |                | 401.1932  |           | L    | 1535.6941 | 1534.6988 |           | 1593.7723 | 1576.7458 |
| 5  | 87.0553  | 557.2831  | 540.2565  |                | 585.2780  | 568.2514  |                | 514.2772  |           | N    | 1421.6512 | 1420.6559 |           | 1480.6883 | 1463.6617 |
| 6  | 44.0495  | 628.3202  | 611.2936  |                | 656.3151  | 639.2885  |                |           |           | A    | 1350.6140 |           |           | 1366.6453 | 1349.6188 |
| 7  | 74.0600  | 729.3679  | 712.3413  | 711.3573       | 757.3628  | 740.3362  | 739.3522       | 713.3729  | 715.3522  | T    | 1249.5664 | 1262.5868 | 1264.5660 | 1295.6082 | 1278.5817 |
| 8  | 44.0495  | 800.4050  | 783.3784  | 782.3944       | 828.3999  | 811.3733  | 810.3893       |           |           | A    | 1178.5293 |           |           | 1194.5606 | 1177.5340 |
| 9  | 30.0338  | 857.4264  | 840.3999  | 839.4159       | 885.4213  | 868.3948  | 867.4108       |           |           | G    |           |           |           | 1123.5234 | 1106.4969 |
| 10 | 74.0600  | 958.4741  | 941.4476  | 940.4635       | 986.4690  | 969.4425  | 968.4585       | 942.4792  | 944.4585  | T    | 1020.4601 | 1033.4805 | 1035.4598 | 1066.5020 | 1049.4754 |
| 11 | 133.0430 | 1118.5048 | 1101.4782 | 1100.4942      | 1146.4997 | 1129.4731 | 1128.4891      | 1029.5112 |           | C    | 860.4295  | 859.4342  |           | 965.4543  | 948.4277  |
| 12 | 102.0550 | 1247.5473 | 1230.5208 | 1229.5368      | 1275.5423 | 1258.5157 | 1257.5317      | 1189.5419 |           | E    | 731.3869  | 730.3916  |           | 805.4236  | 788.3971  |
| 13 | 102.0550 | 1376.5899 | 1359.5634 | 1358.5794      | 1404.5849 | 1387.5583 | 1386.5743      | 1318.5845 |           | E    | 602.3443  | 601.3490  |           | 676.3811  | 659.3545  |
| 14 | 104.0528 | 1507.6304 | 1490.6039 | 1489.6199      | 1535.6253 | 1518.5988 | 1517.6148      | 1447.6271 |           | M    | 471.3038  | 470.3085  |           | 547.3385  | 530.3119  |
| 15 | 86.0964  | 1620.7145 | 1603.6879 | 1602.7039      | 1648.7094 | 1631.6829 | 1630.6988      | 1592.6832 | 1606.6988 | I    | 358.2197  | 371.2401  | 385.2558  | 416.2980  | 399.2714  |
| 16 | 101.1073 | 1748.8095 | 1731.7829 | 1730.7989      | 1776.8044 | 1759.7778 | 1758.7938      | 1691.7516 |           | K    | 230.1248  | 229.1295  |           | 303.2139  | 286.1874  |
| 17 | 129.1135 |           |           |                |           |           |                |           |           | R    | 74.0237   | 73.0284   |           | 175.1190  | 158.0924  |

| Seq    | ya       | yb       | Seq     | ya       | yb       | Seq   | ya       | yb       |
|--------|----------|----------|---------|----------|----------|-------|----------|----------|
| HY     | 273.1346 | 301.1295 | HYL     | 386.2187 | 414.2136 | HYLN  | 500.2616 | 528.2565 |
| HYLN   | 571.2987 | 599.2936 | HYLNAT  | 672.3464 | 700.3413 | YL    | 249.1598 | 277.1547 |
| YLN    | 363.2027 | 391.1976 | YLN     | 434.2398 | 462.2347 | YLNAT | 535.2875 | 563.2824 |
| YLNATA | 606.3246 | 634.3195 | YLNATAG | 663.3461 | 691.3410 | LN    | 200.1394 | 228.1343 |

|                        |          |          |                         |          |                          |                        |          |          |
|------------------------|----------|----------|-------------------------|----------|--------------------------|------------------------|----------|----------|
| <a href="#">LNA</a>    | 271.1765 | 299.1714 | <a href="#">LNAT</a>    | 372.2241 | 400.2191                 | <a href="#">LNATA</a>  | 443.2613 | 471.2562 |
| <a href="#">LNATAG</a> | 500.2827 | 528.2776 | <a href="#">LNATAGT</a> | 601.3304 | 629.3253                 | <a href="#">NA</a>     | 158.0924 | 186.0873 |
| <a href="#">NAT</a>    | 259.1401 | 287.1350 | <a href="#">NATA</a>    | 330.1772 | <a href="#">358.1721</a> | <a href="#">NATAG</a>  | 387.1987 | 415.1936 |
| <a href="#">NATAGT</a> | 488.2463 | 516.2413 | <a href="#">NATAGTC</a> | 648.2770 | <a href="#">676.2719</a> | <a href="#">AT</a>     | 145.0972 | 173.0921 |
| <a href="#">ATA</a>    | 216.1343 | 244.1292 | <a href="#">ATAG</a>    | 273.1557 | 301.1506                 | <a href="#">ATAGT</a>  | 374.2034 | 402.1983 |
| <a href="#">ATAGTC</a> | 534.2341 | 562.2290 | <a href="#">ATAGTCE</a> | 663.2767 | 691.2716                 | <a href="#">TA</a>     | 145.0972 | 173.0921 |
| <a href="#">TAG</a>    | 202.1186 | 230.1135 | <a href="#">TAGT</a>    | 303.1663 | 331.1612                 | <a href="#">TAGTC</a>  | 463.1969 | 491.1919 |
| <a href="#">TAGTCE</a> | 592.2395 | 620.2345 | <a href="#">AG</a>      | 101.0709 | <a href="#">129.0659</a> | <a href="#">AGT</a>    | 202.1186 | 230.1135 |
| <a href="#">AGTC</a>   | 362.1493 | 390.1442 | <a href="#">AGTCE</a>   | 491.1919 | 519.1868                 | <a href="#">AGTCEE</a> | 620.2345 | 648.2294 |
| <a href="#">GT</a>     | 131.0815 | 159.0764 | <a href="#">GTC</a>     | 291.1122 | 319.1071                 | <a href="#">GTCE</a>   | 420.1547 | 448.1497 |
| <a href="#">GTCEE</a>  | 549.1973 | 577.1923 | <a href="#">GTCEEM</a>  | 680.2378 | 708.2327                 | <a href="#">TC</a>     | 234.0907 | 262.0856 |
| <a href="#">TCE</a>    | 363.1333 | 391.1282 | <a href="#">TCEE</a>    | 492.1759 | 520.1708                 | <a href="#">TCEEM</a>  | 623.2164 | 651.2113 |
| <a href="#">CE</a>     | 262.0856 | 290.0805 | <a href="#">CEE</a>     | 391.1282 | 419.1231                 | <a href="#">CEEM</a>   | 522.1687 | 550.1636 |
| <a href="#">CEEMI</a>  | 635.2527 | 663.2477 | <a href="#">EE</a>      | 231.0975 | 259.0925                 | <a href="#">EEM</a>    | 362.1380 | 390.1329 |
| <a href="#">EEMI</a>   | 475.2221 | 503.2170 | <a href="#">EEMIK</a>   | 603.3171 | 631.3120                 | <a href="#">EM</a>     | 233.0954 | 261.0904 |
| <a href="#">EMI</a>    | 346.1795 | 374.1744 | <a href="#">EMIK</a>    | 474.2745 | 502.2694                 | <a href="#">MI</a>     | 217.1369 | 245.1318 |
| <a href="#">MIK</a>    | 345.2319 | 373.2268 | <a href="#">IK</a>      | 214.1914 | 242.1863                 |                        |          |          |

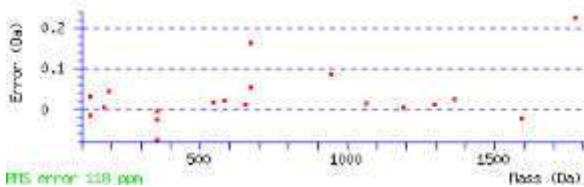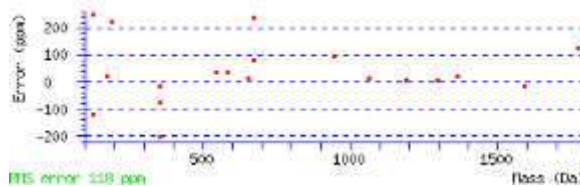

NCBI **BLAST** search of [GHYLNATAGTCEEMIKR](#)

(Parameters: blastp, nr protein database, expect=20000, no filter, PAM30)

Other BLAST [web gateways](#)

#### All matches to this query

| Score | Mr(calc)  | Delta  | Sequence                          |
|-------|-----------|--------|-----------------------------------|
| 51.4  | 1949.9087 | 0.1731 | <a href="#">GHYLNATAGTCEEMIKR</a> |
| 51.4  | 1949.9087 | 0.1731 | <a href="#">GHYLNATAGTCEEMLKR</a> |
| 51.4  | 1949.9087 | 0.1731 | <a href="#">GHYLNATAGTCEEMIKR</a> |
| 51.4  | 1949.9087 | 0.1731 | <a href="#">GHYLNATAGTCEEMIKR</a> |
| 51.4  | 1949.9087 | 0.1731 | <a href="#">GHYLNATAGTCEELMKR</a> |
| 51.4  | 1949.9087 | 0.1731 | <a href="#">GHYLNATAGTCEELMKR</a> |
| 51.4  | 1949.9087 | 0.1731 | <a href="#">GHYLNATAGTCEEMIKR</a> |
| 51.4  | 1949.9087 | 0.1731 | <a href="#">GHYLNATAGTCEEMIKR</a> |
| 51.4  | 1949.9087 | 0.1731 | <a href="#">GHYLNATAGTCEEMIKR</a> |
| 51.4  | 1949.9087 | 0.1731 | <a href="#">GHYLNATAGTCEEMIKR</a> |
| 51.4  | 1949.9087 | 0.1731 | <a href="#">GHYLNATAGTCEEMIKR</a> |

Mascot: <http://www.matrixscience.com/>

**MATRIX SCIENCE Mascot Search Results**

**Peptide View Spot no 138**

MS/MS Fragmentation of **SACKWSP ELAAACEIWK**

Found in **gi|11466795** in **NCBI nr**, ribulose-1,5-bisphosphate carboxylase/oxygenase large subunit [Oryza sativa Japonica Group]

Match to Query 58: 2006.113724 from(2007.121000,1+) intensity(0.0000) index(20)

Title: Label: F12, Spot\_Id: 216658, Peak\_List\_Id: 221803, MSMS Job\_Run\_Id: 21391, Comment:

Data file C:\Documents and Settings\Administrator\Desktop\farah BHU\Cotton leaves\RAJESH\12-1-13 raj\ppw\_F12\_136117698300.txt

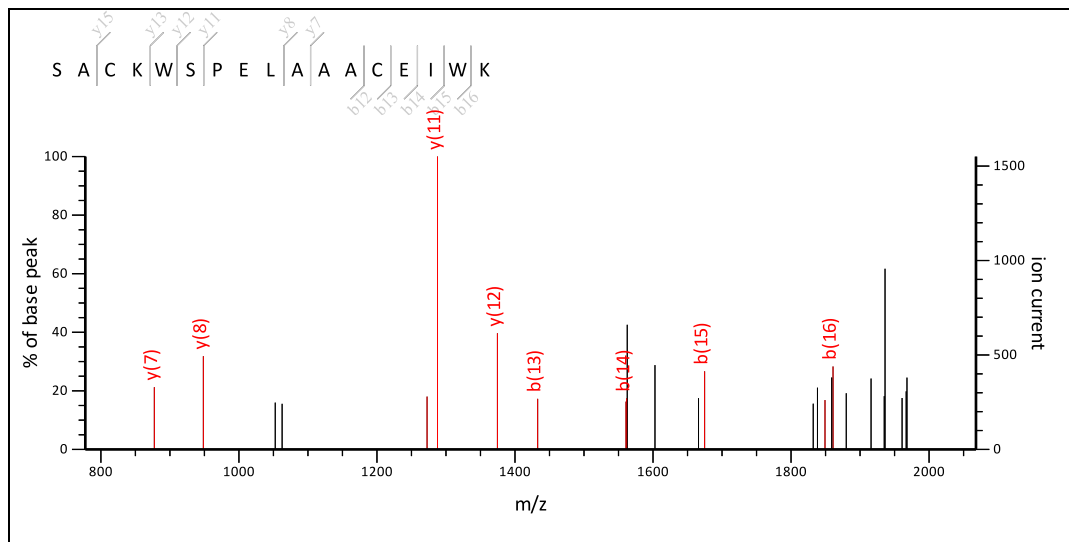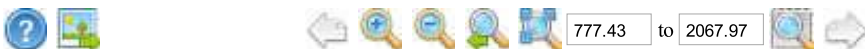

Label all possible matches  Label matches used for scoring

Monoisotopic mass of neutral peptide Mr(calc): 2005.9390

Fixed modifications: Carbamidomethyl (C) (apply to specified residues or termini only)

Ions Score: 41 Expect: 0.27

Matches : 11/305 fragment ions using 22 most intense peaks [\(help\)](#)

| #  | Immon.   | a         | a*        | a <sup>0</sup> | b         | b*        | b <sup>0</sup> | d         | d'        | Seq. | v         | w         | w'       | y         | y*        |
|----|----------|-----------|-----------|----------------|-----------|-----------|----------------|-----------|-----------|------|-----------|-----------|----------|-----------|-----------|
| 1  | 60.0444  | 60.0444   |           | 42.0338        | 88.0393   |           | 70.0287        | 44.0495   |           | S    |           |           |          |           |           |
| 2  | 44.0495  | 131.0815  |           | 113.0709       | 159.0764  |           | 141.0659       |           |           | A    | 1903.8830 |           |          | 1919.9143 | 1902.8877 |
| 3  | 133.0430 | 291.1122  |           | 273.1016       | 319.1071  |           | 301.0965       | 202.1186  |           | C    | 1743.8523 | 1742.8571 |          | 1848.8771 | 1831.8506 |
| 4  | 101.1073 | 419.2071  | 402.1806  | 401.1966       | 447.2020  | 430.1755  | 429.1915       | 362.1493  |           | K    | 1615.7573 | 1614.7621 |          | 1688.8465 | 1671.8199 |
| 5  | 159.0917 | 605.2864  | 588.2599  | 587.2759       | 633.2813  | 616.2548  | 615.2708       |           |           | W    | 1429.6780 |           |          | 1560.7515 | 1543.7250 |
| 6  | 60.0444  | 692.3185  | 675.2919  | 674.3079       | 720.3134  | 703.2868  | 702.3028       | 676.3235  |           | S    | 1342.6460 | 1341.6508 |          | 1374.6722 | 1357.6457 |
| 7  | 70.0651  | 789.3712  | 772.3447  | 771.3607       | 817.3661  | 800.3396  | 799.3556       | 763.3556  |           | P    | 1245.5932 | 1244.5980 |          | 1287.6402 | 1270.6136 |
| 8  | 102.0550 | 918.4138  | 901.3873  | 900.4032       | 946.4087  | 929.3822  | 928.3982       | 860.4083  |           | E    | 1116.5506 | 1115.5554 |          | 1190.5874 | 1173.5609 |
| 9  | 86.0964  | 1031.4979 | 1014.4713 | 1013.4873      | 1059.4928 | 1042.4662 | 1041.4822      | 989.4509  |           | L    | 1003.4666 | 1002.4713 |          | 1061.5448 | 1044.5183 |
| 10 | 44.0495  | 1102.5350 | 1085.5084 | 1084.5244      | 1130.5299 | 1113.5034 | 1112.5193      |           |           | A    | 932.4295  |           |          | 948.4608  | 931.4342  |
| 11 | 44.0495  | 1173.5721 | 1156.5456 | 1155.5615      | 1201.5670 | 1184.5405 | 1183.5565      |           |           | A    | 861.3924  |           |          | 877.4237  | 860.3971  |
| 12 | 44.0495  | 1244.6092 | 1227.5827 | 1226.5987      | 1272.6041 | 1255.5776 | 1254.5936      |           |           | A    | 790.3552  |           |          | 806.3865  | 789.3600  |
| 13 | 133.0430 | 1404.6399 | 1387.6133 | 1386.6293      | 1432.6348 | 1415.6082 | 1414.6242      | 1315.6463 |           | C    | 630.3246  | 629.3293  |          | 735.3494  | 718.3229  |
| 14 | 102.0550 | 1533.6825 | 1516.6559 | 1515.6719      | 1561.6774 | 1544.6508 | 1543.6668      | 1475.6770 |           | E    | 501.2820  | 500.2867  |          | 575.3188  | 558.2922  |
| 15 | 86.0964  | 1646.7665 | 1629.7400 | 1628.7560      | 1674.7614 | 1657.7349 | 1656.7509      | 1618.7352 | 1632.7509 | I    | 388.1979  | 401.2183  | 415.2340 | 446.2762  | 429.2496  |
| 16 | 159.0917 | 1832.8458 | 1815.8193 | 1814.8353      | 1860.8408 | 1843.8142 | 1842.8302      |           |           | W    | 202.1186  |           |          | 333.1921  | 316.1656  |
| 17 | 101.1073 |           |           |                |           |           |                |           |           | K    | 74.0237   | 73.0284   |          | 147.1128  | 130.0863  |

| Seq   | ya       | yb       | Seq   | ya       | yb       | Seq   | ya       | yb       |
|-------|----------|----------|-------|----------|----------|-------|----------|----------|
| AC    | 204.0801 | 232.0750 | ACK   | 332.1751 | 360.1700 | ACKW  | 518.2544 | 546.2493 |
| ACKWS | 605.2864 | 633.2813 | CK    | 261.1380 | 289.1329 | CKW   | 447.2173 | 475.2122 |
| CKWS  | 534.2493 | 562.2442 | CKWSP | 631.3021 | 659.2970 | KW    | 287.1866 | 315.1816 |
| KWS   | 374.2187 | 402.2136 | KWSP  | 471.2714 | 499.2663 | KWSPE | 600.3140 | 628.3089 |



|        |          |          |         |          |          |        |          |          |
|--------|----------|----------|---------|----------|----------|--------|----------|----------|
| WS     | 246.1237 | 274.1186 | WSP     | 343.1765 | 371.1714 | WSPE   | 472.2191 | 500.2140 |
| WSP    | 585.3031 | 613.2980 | WSPELA  | 656.3402 | 684.3352 | SP     | 157.0972 | 185.0921 |
| SPE    | 286.1397 | 314.1347 | SPEL    | 399.2238 | 427.2187 | SPELA  | 470.2609 | 498.2558 |
| SPELAA | 541.2980 | 569.2930 | SPELAAA | 612.3352 | 640.3301 | PE     | 199.1077 | 227.1026 |
| PEL    | 312.1918 | 340.1867 | PELA    | 383.2289 | 411.2238 | PELAA  | 454.2660 | 482.2609 |
| PELAAA | 525.3031 | 553.2980 | PELAAAC | 685.3338 | 713.3287 | EL     | 215.1390 | 243.1339 |
| ELA    | 286.1761 | 314.1710 | ELAA    | 357.2132 | 385.2082 | ELAAA  | 428.2504 | 456.2453 |
| ELAAA  | 588.2810 | 616.2759 | LA      | 157.1335 | 185.1285 | LAA    | 228.1707 | 256.1656 |
| LAAA   | 299.2078 | 327.2027 | LAAAC   | 459.2384 | 487.2333 | LAAACE | 588.2810 | 616.2759 |
| AA     | 115.0866 | 143.0815 | AAA     | 186.1237 | 214.1186 | AAAC   | 346.1544 | 374.1493 |
| AAACE  | 475.1969 | 503.1919 | AAACEI  | 588.2810 | 616.2759 | AA     | 115.0866 | 143.0815 |
| AAC    | 275.1172 | 303.1122 | AACE    | 404.1598 | 432.1547 | AACEI  | 517.2439 | 545.2388 |
| AC     | 204.0801 | 232.0750 | ACE     | 333.1227 | 361.1176 | ACEI   | 446.2068 | 474.2017 |
| ACEIW  | 632.2861 | 660.2810 | CE      | 262.0856 | 290.0805 | CEI    | 375.1697 | 403.1646 |
| CEIW   | 561.2490 | 589.2439 | EI      | 215.1390 | 243.1339 | EIW    | 401.2183 | 429.2132 |
| IW     | 272.1757 | 300.1707 |         |          |          |        |          |          |

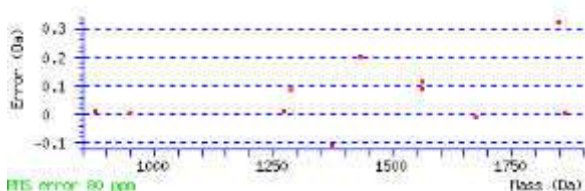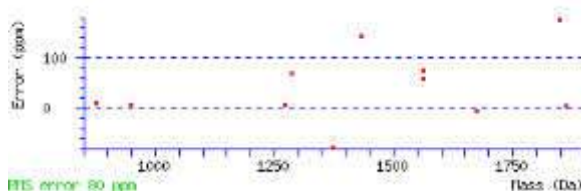

NCBI BLAST search of [SACKWSPELAAACEIWK](#)

(Parameters: blastp, nr protein database, expect=20000, no filter, PAM30)

Other BLAST [web gateways](#)

#### All matches to this query

| Score | Mr(calc)  | Delta   | Sequence                           |
|-------|-----------|---------|------------------------------------|
| 41.3  | 2005.9390 | 0.1748  | <a href="#">SACKWSPELAAACEIWK</a>  |
| 14.5  | 2006.1023 | 0.0114  | <a href="#">ALFLPIYQLVEMGNVRK</a>  |
| 14.2  | 2006.8866 | -0.7729 | <a href="#">SACKWSPELAAACEIWE</a>  |
| 14.1  | 2006.8866 | -0.7729 | <a href="#">EACSWPELAAACEIWK</a>   |
| 13.3  | 2004.9615 | 1.1523  | <a href="#">ETSKWSPELAAACEIWK</a>  |
| 11.3  | 2005.9217 | 0.1920  | <a href="#">GAGGNAFPWSNAMLQWQR</a> |
| 7.5   | 2006.0506 | 0.0631  | <a href="#">AILMIINAANTYQOVAEK</a> |
| 7.3   | 2005.9311 | 0.1826  | <a href="#">AGTGTAMFSGIFMALQEK</a> |
| 6.7   | 2006.0196 | 0.0941  | <a href="#">HECFQIRVSPLNYTPK</a>   |
| 6.4   | 2005.8254 | 0.2884  | <a href="#">CLDADCGYGAFSMMLAEK</a> |

Mascot: <http://www.matrixscience.com/>



**MATRIX SCIENCE Mascot Search Results**

**Peptide View Spot no 138**

MS/MS Fragmentation of **MSGGDHHAGTVVGKLEGER**

Found in **gi|11466795** in **NCBI nr**, ribulose-1,5-bisphosphate carboxylase/oxygenase large subunit [Oryza sativa Japonica Group]

Match to Query 60: 2049.192924 from(2050.200200,1+) intensity(0.0000) index(21)

Title: Label: F12, Spot\_Id: 216658, Peak\_List\_Id: 221797, MSMS Job\_Run\_Id: 21391, Comment:

Data file C:\Documents and Settings\Administrator\Desktop\farah BHU\Cotton leaves\RAJESH\12-1-13 raj\ppw\_F12\_136117698300.txt

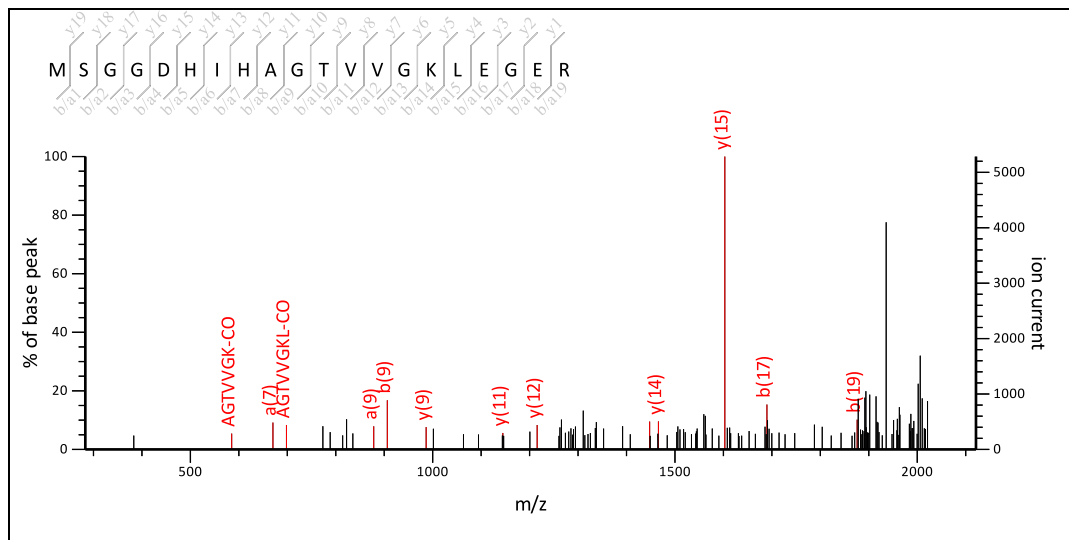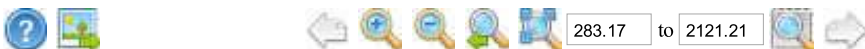

Label all possible matches  Label matches used for scoring

Monoisotopic mass of neutral peptide Mr(calc): 2049.0062

Fixed modifications: Carbamidomethyl (C) (apply to specified residues or termini only)

Ions Score: 24 Expect: 14

Matches : 17/369 fragment ions using 30 most intense peaks ([help](#))

| #  | Immon.   | a               | a*        | a <sup>0</sup> | b                | b*        | b <sup>0</sup> | d         | d'        | Seq. | v         | w         | w'        | y                | y*        |
|----|----------|-----------------|-----------|----------------|------------------|-----------|----------------|-----------|-----------|------|-----------|-----------|-----------|------------------|-----------|
| 1  | 104.0528 | 104.0528        |           |                | 132.0478         |           |                | 44.0495   |           | M    |           |           |           |                  |           |
| 2  | 60.0444  | 191.0849        |           | 173.0743       | 219.0798         |           | 201.0692       | 175.0900  |           | S    | 1886.9468 | 1885.9515 |           | 1918.9730        | 1901.9464 |
| 3  | 30.0338  | 248.1063        |           | 230.0958       | 276.1013         |           | 258.0907       |           |           | G    |           |           |           | 1831.9409        | 1814.9144 |
| 4  | 30.0338  | 305.1278        |           | 287.1172       | 333.1227         |           | 315.1122       |           |           | G    |           |           |           | 1774.9195        | 1757.8929 |
| 5  | 88.0393  | 420.1547        |           | 402.1442       | 448.1497         |           | 430.1391       | 376.1649  |           | D    | 1657.8769 | 1656.8816 |           | 1717.8980        | 1700.8715 |
| 6  | 110.0713 | 557.2137        |           | 539.2031       | <b>585.2086</b>  |           | 567.1980       |           |           | H    | 1520.8180 |           |           | <b>1602.8711</b> | 1585.8445 |
| 7  | 86.0964  | <b>670.2977</b> |           | 652.2872       | <b>698.2926</b>  |           | 680.2821       | 642.2664  | 656.2821  | I    | 1407.7339 | 1420.7543 | 1434.7700 | <b>1465.8122</b> | 1448.7856 |
| 8  | 110.0713 | 807.3566        |           | 789.3461       | 835.3515         |           | 817.3410       |           |           | H    | 1270.6750 |           |           | 1352.7281        | 1335.7015 |
| 9  | 44.0495  | <b>878.3937</b> |           | 860.3832       | <b>906.3887</b>  |           | 888.3781       |           |           | A    | 1199.6379 |           |           | <b>1215.6692</b> | 1198.6426 |
| 10 | 30.0338  | 935.4152        |           | 917.4046       | 963.4101         |           | 945.3996       |           |           | G    |           |           |           | <b>1144.6321</b> | 1127.6055 |
| 11 | 74.0600  | 1036.4629       |           | 1018.4523      | 1064.4578        |           | 1046.4472      | 1020.4680 | 1022.4472 | T    | 1041.5687 | 1054.5891 | 1056.5684 | 1087.6106        | 1070.5841 |
| 12 | 72.0808  | 1135.5313       |           | 1117.5207      | 1163.5262        |           | 1145.5157      | 1121.5157 |           | V    | 942.5003  | 955.5207  |           | <b>986.5629</b>  | 969.5364  |
| 13 | 72.0808  | 1234.5997       |           | 1216.5892      | 1262.5946        |           | 1244.5841      | 1220.5841 |           | V    | 843.4319  | 856.4523  |           | 887.4945         | 870.4680  |
| 14 | 30.0338  | 1291.6212       |           | 1273.6106      | 1319.6161        |           | 1301.6055      |           |           | G    |           |           |           | 788.4261         | 771.3995  |
| 15 | 101.1073 | 1419.7161       | 1402.6896 | 1401.7056      | <b>1447.7111</b> | 1430.6845 | 1429.7005      | 1362.6583 |           | K    | 658.3155  | 657.3202  |           | 731.4046         | 714.3781  |
| 16 | 86.0964  | 1532.8002       | 1515.7737 | 1514.7896      | 1560.7951        | 1543.7686 | 1542.7846      | 1490.7533 |           | L    | 545.2314  | 544.2362  |           | 603.3097         | 586.2831  |
| 17 | 102.0550 | 1661.8428       | 1644.8163 | 1643.8322      | <b>1689.8377</b> | 1672.8112 | 1671.8272      | 1603.8373 |           | E    | 416.1888  | 415.1936  |           | 490.2256         | 473.1991  |
| 18 | 30.0338  | 1718.8643       | 1701.8377 | 1700.8537      | 1746.8592        | 1729.8326 | 1728.8486      |           |           | G    |           |           |           | 361.1830         | 344.1565  |
| 19 | 102.0550 | 1847.9069       | 1830.8803 | 1829.8963      | <b>1875.9018</b> | 1858.8752 | 1857.8912      | 1789.9014 |           | E    | 230.1248  | 229.1295  |           | 304.1615         | 287.1350  |
| 20 | 129.1135 |                 |           |                |                  |           |                |           |           | R    | 74.0237   | 73.0284   |           | 175.1190         | 158.0924  |

| Seq | ya       | yb       | Seq | ya       | yb       | Seq  | ya       | yb       |
|-----|----------|----------|-----|----------|----------|------|----------|----------|
| SG  | 117.0659 | 145.0608 | SGG | 174.0873 | 202.0822 | SGGD | 289.1143 | 317.1092 |

|                        |          |          |                         |          |          |                          |          |          |
|------------------------|----------|----------|-------------------------|----------|----------|--------------------------|----------|----------|
| <a href="#">SGGDH</a>  | 426.1732 | 454.1681 | <a href="#">SGGDHI</a>  | 539.2572 | 567.2522 | <a href="#">SGGDHIH</a>  | 676.3161 | 704.3111 |
| <a href="#">GG</a>     | 87.0553  | 115.0502 | <a href="#">GGD</a>     | 202.0822 | 230.0771 | <a href="#">GGDH</a>     | 339.1411 | 367.1361 |
| <a href="#">GGDHI</a>  | 452.2252 | 480.2201 | <a href="#">GGDHIH</a>  | 589.2841 | 617.2790 | <a href="#">GGDHIHA</a>  | 660.3212 | 688.3161 |
| <a href="#">GD</a>     | 145.0608 | 173.0557 | <a href="#">GDH</a>     | 282.1197 | 310.1146 | <a href="#">GDHI</a>     | 395.2037 | 423.1987 |
| <a href="#">GDHIH</a>  | 532.2627 | 560.2576 | <a href="#">GDHIHA</a>  | 603.2998 | 631.2947 | <a href="#">GDHIHAG</a>  | 660.3212 | 688.3161 |
| <a href="#">DH</a>     | 225.0982 | 253.0931 | <a href="#">DHI</a>     | 338.1823 | 366.1772 | <a href="#">DHIH</a>     | 475.2412 | 503.2361 |
| <a href="#">DHIHA</a>  | 546.2783 | 574.2732 | <a href="#">DHIHAG</a>  | 603.2998 | 631.2947 | <a href="#">HI</a>       | 223.1553 | 251.1503 |
| <a href="#">HIH</a>    | 360.2142 | 388.2092 | <a href="#">HIHA</a>    | 431.2514 | 459.2463 | <a href="#">HIHAG</a>    | 488.2728 | 516.2677 |
| <a href="#">HIHAGT</a> | 589.3205 | 617.3154 | <a href="#">HIHAGTV</a> | 688.3889 | 716.3838 | <a href="#">IH</a>       | 223.1553 | 251.1503 |
| <a href="#">IHA</a>    | 294.1925 | 322.1874 | <a href="#">IHAG</a>    | 351.2139 | 379.2088 | <a href="#">IHAGT</a>    | 452.2616 | 480.2565 |
| <a href="#">IHAGTV</a> | 551.3300 | 579.3249 | <a href="#">IHAGTVV</a> | 650.3984 | 678.3933 | <a href="#">HA</a>       | 181.1084 | 209.1033 |
| <a href="#">HAG</a>    | 238.1299 | 266.1248 | <a href="#">HAGT</a>    | 339.1775 | 367.1724 | <a href="#">HAGTV</a>    | 438.2459 | 466.2409 |
| <a href="#">HAGTVV</a> | 537.3144 | 565.3093 | <a href="#">HAGTVVG</a> | 594.3358 | 622.3307 | <a href="#">AG</a>       | 101.0709 | 129.0659 |
| <a href="#">AGT</a>    | 202.1186 | 230.1135 | <a href="#">AGTV</a>    | 301.1870 | 329.1819 | <a href="#">AGTVV</a>    | 400.2554 | 428.2504 |
| <a href="#">AGTVVG</a> | 457.2769 | 485.2718 | <a href="#">AGTVVGK</a> | 585.3719 | 613.3668 | <a href="#">AGTVVGKL</a> | 698.4559 | 726.4509 |
| <a href="#">GT</a>     | 131.0815 | 159.0764 | <a href="#">GTV</a>     | 230.1499 | 258.1448 | <a href="#">GTVV</a>     | 329.2183 | 357.2132 |
| <a href="#">GTVVG</a>  | 386.2398 | 414.2347 | <a href="#">GTVVGK</a>  | 514.3348 | 542.3297 | <a href="#">GTVVGKL</a>  | 627.4188 | 655.4137 |
| <a href="#">TV</a>     | 173.1285 | 201.1234 | <a href="#">TVV</a>     | 272.1969 | 300.1918 | <a href="#">TVVG</a>     | 329.2183 | 357.2132 |
| <a href="#">TVVGK</a>  | 457.3133 | 485.3082 | <a href="#">TVVGKL</a>  | 570.3974 | 598.3923 | <a href="#">TVVGKLE</a>  | 699.4400 | 727.4349 |
| <a href="#">VV</a>     | 171.1492 | 199.1441 | <a href="#">VVG</a>     | 228.1707 | 256.1656 | <a href="#">VVGK</a>     | 356.2656 | 384.2605 |
| <a href="#">VVGKL</a>  | 469.3497 | 497.3446 | <a href="#">VVGKLE</a>  | 598.3923 | 626.3872 | <a href="#">VVGKLEG</a>  | 655.4137 | 683.4087 |
| <a href="#">VG</a>     | 129.1022 | 157.0972 | <a href="#">VGK</a>     | 257.1972 | 285.1921 | <a href="#">VGKL</a>     | 370.2813 | 398.2762 |
| <a href="#">VGKLE</a>  | 499.3239 | 527.3188 | <a href="#">VGKLEG</a>  | 556.3453 | 584.3402 | <a href="#">VGKLEGE</a>  | 685.3879 | 713.3828 |
| <a href="#">GK</a>     | 158.1288 | 186.1237 | <a href="#">GKL</a>     | 271.2129 | 299.2078 | <a href="#">GKLE</a>     | 400.2554 | 428.2504 |
| <a href="#">GKLEG</a>  | 457.2769 | 485.2718 | <a href="#">GKLEGE</a>  | 586.3195 | 614.3144 | <a href="#">KL</a>       | 214.1914 | 242.1863 |
| <a href="#">KLE</a>    | 343.2340 | 371.2289 | <a href="#">KLEG</a>    | 400.2554 | 428.2504 | <a href="#">KLEGE</a>    | 529.2980 | 557.2930 |
| <a href="#">LE</a>     | 215.1390 | 243.1339 | <a href="#">LEG</a>     | 272.1605 | 300.1554 | <a href="#">LEGE</a>     | 401.2031 | 429.1980 |
| <a href="#">EG</a>     | 159.0764 | 187.0713 | <a href="#">EGE</a>     | 288.1190 | 316.1139 | <a href="#">GE</a>       | 159.0764 | 187.0713 |

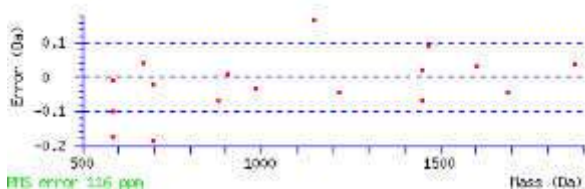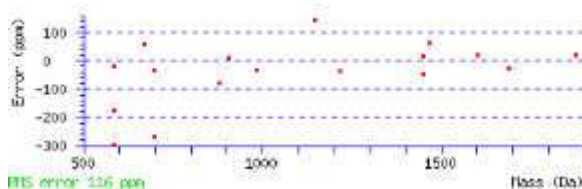

NCBI BLAST search of [MSGGDHIHAGTVVGKLEGER](#)  
 (Parameters: blastp, nr protein database, expect=20000, no filter, PAM30)  
 Other BLAST [web gateways](#)

All matches to this query

| Score | Mr(calc)  | Delta  | Sequence                             |
|-------|-----------|--------|--------------------------------------|
| 27.4  | 2048.5142 | 0.6787 | <a href="#">MAGGDHIHAGTVVGKLZGER</a> |
| 24.2  | 2049.0062 | 0.1867 | <a href="#">MAGGDHIHAGTVVGKLEGER</a> |
| 24.2  | 2049.0062 | 0.1867 | <a href="#">MAGGDHIHAGTVVGKLEGER</a> |
| 24.2  | 2049.0062 | 0.1867 | <a href="#">MSGGDHIHAGTVVGKIEGER</a> |
| 24.2  | 2049.0062 | 0.1867 | <a href="#">MSGGDHIHAGTVVGKLEGER</a> |
| 24.2  | 2049.0062 | 0.1867 | <a href="#">MSGGDHIHAGTVVGKLEGER</a> |
| 24.2  | 2049.0062 | 0.1867 | <a href="#">MSGGDHIHAGTVVGKLEGER</a> |
| 24.2  | 2049.0062 | 0.1867 | <a href="#">MSGGDHIHAGTVVGKLEGER</a> |
| 24.2  | 2049.0062 | 0.1867 | <a href="#">MSGGDHIHAGTVVGKLEGER</a> |
| 24.2  | 2049.0062 | 0.1867 | <a href="#">MSGGDHIHAGTVVGKLEGER</a> |

Mascot: <http://www.matrixscience.com/>

**MATRIX SCIENCE Mascot Search Results**

**Peptide View Spot no 138**

MS/MS Fragmentation of **GGLDFTKDDENVNSQPFMR**

Found in **gi|11466795** in **NCBIInr**, ribulose-1,5-bisphosphate carboxylase/oxygenase large subunit [Oryza sativa Japonica Group]

Match to Query 70: 2169.171224 from(2170.178500,1+) intensity(0.0000) index(23)

Title: Label: F12, Spot\_Id: 216658, Peak\_List\_Id: 221781, MSMS Job\_Run\_Id: 21391, Comment:

Data file C:\Documents and Settings\Administrator\Desktop\farah BHU\Cotton leaves\RAJESH\12-1-13 raj\ppw\_F12\_136117698300.txt

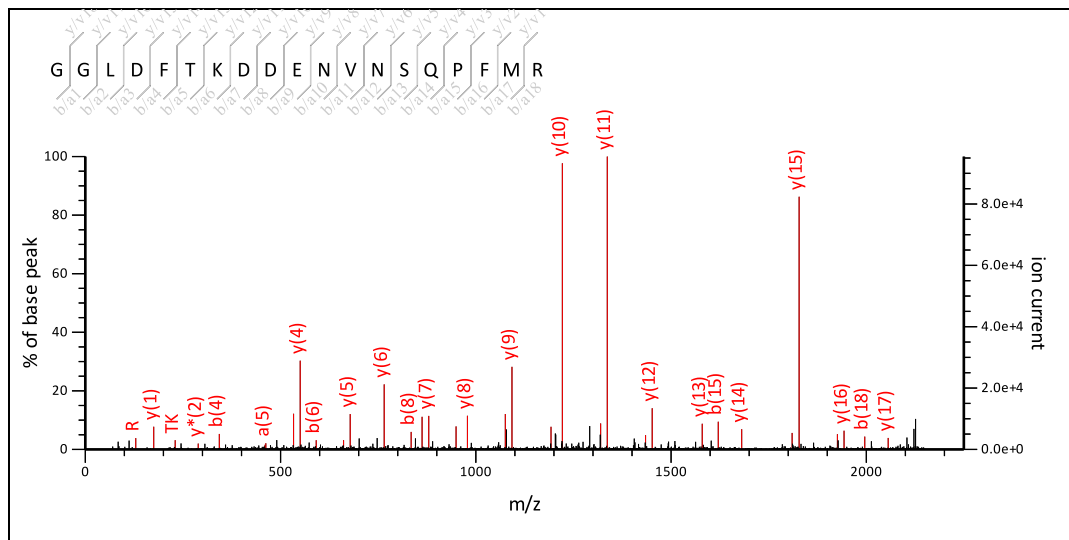

Navigation icons: Home, Back, Forward, Search, Print, etc. Range: 0 to 2249.66

Label all possible matches  Label matches used for scoring

Monoisotopic mass of neutral peptide Mr(calc): 2168.9797

Fixed modifications: Carbamidomethyl (C) (apply to specified residues or termini only)

Ions Score: 137 Expect: 9.5e-11

Matches : 40/340 fragment ions using 42 most intense peaks (help)

| #  | Immon.   | a         | a*        | a <sup>0</sup> | b         | b*        | b <sup>0</sup> | d         | d'       | Seq. | v         | w         | w'        | y         | y*        |
|----|----------|-----------|-----------|----------------|-----------|-----------|----------------|-----------|----------|------|-----------|-----------|-----------|-----------|-----------|
| 1  | 30.0338  | 30.0338   |           |                | 58.0287   |           |                | 44.0495   |          | G    |           |           |           |           |           |
| 2  | 30.0338  | 87.0553   |           |                | 115.0502  |           |                |           |          | G    |           |           |           | 2112.9655 | 2095.9389 |
| 3  | 86.0964  | 200.1394  |           |                | 228.1343  |           |                | 158.0924  |          | L    | 1997.8658 | 1996.8705 |           | 2055.9440 | 2038.9175 |
| 4  | 88.0393  | 315.1663  |           | 297.1557       | 343.1612  |           | 325.1506       | 271.1765  |          | D    | 1882.8388 | 1881.8436 |           | 1942.8600 | 1925.8334 |
| 5  | 120.0808 | 462.2347  |           | 444.2241       | 490.2296  |           | 472.2191       |           |          | F    | 1735.7704 |           |           | 1827.8330 | 1810.8065 |
| 6  | 74.0600  | 563.2824  |           | 545.2718       | 591.2773  |           | 573.2667       | 547.2875  | 549.2667 | T    | 1634.7227 | 1647.7431 | 1649.7224 | 1680.7646 | 1663.7381 |
| 7  | 101.1073 | 691.3774  | 674.3508  | 673.3668       | 719.3723  | 702.3457  | 701.3617       | 634.3195  |          | K    | 1506.6278 | 1505.6325 |           | 1579.7169 | 1562.6904 |
| 8  | 88.0393  | 806.4043  | 789.3777  | 788.3937       | 834.3992  | 817.3727  | 816.3886       | 762.4145  |          | D    | 1391.6008 | 1390.6056 |           | 1451.6220 | 1434.5954 |
| 9  | 88.0393  | 921.4312  | 904.4047  | 903.4207       | 949.4262  | 932.3996  | 931.4156       | 877.4414  |          | D    | 1276.5739 | 1275.5786 |           | 1336.5950 | 1319.5685 |
| 10 | 102.0550 | 1050.4738 | 1033.4473 | 1032.4633      | 1078.4687 | 1061.4422 | 1060.4582      | 992.4684  |          | E    | 1147.5313 | 1146.5361 |           | 1221.5681 | 1204.5415 |
| 11 | 87.0553  | 1164.5168 | 1147.4902 | 1146.5062      | 1192.5117 | 1175.4851 | 1174.5011      | 1121.5109 |          | N    | 1033.4884 | 1032.4931 |           | 1092.5255 | 1075.4989 |
| 12 | 72.0808  | 1263.5852 | 1246.5586 | 1245.5746      | 1291.5801 | 1274.5535 | 1273.5695      | 1249.5695 |          | V    | 934.4200  | 947.4404  |           | 978.4826  | 961.4560  |
| 13 | 87.0553  | 1377.6281 | 1360.6016 | 1359.6175      | 1405.6230 | 1388.5965 | 1387.6124      | 1334.6223 |          | N    | 820.3770  | 819.3818  |           | 879.4141  | 862.3876  |
| 14 | 60.0444  | 1464.6601 | 1447.6336 | 1446.6496      | 1492.6550 | 1475.6285 | 1474.6445      | 1448.6652 |          | S    | 733.3450  | 732.3498  |           | 765.3712  | 748.3447  |
| 15 | 101.0709 | 1592.7187 | 1575.6922 | 1574.7081      | 1620.7136 | 1603.6871 | 1602.7031      | 1535.6972 |          | Q    | 605.2864  | 604.2912  |           | 678.3392  | 661.3126  |
| 16 | 70.0651  | 1689.7715 | 1672.7449 | 1671.7609      | 1717.7664 | 1700.7398 | 1699.7558      | 1663.7558 |          | P    | 508.2337  | 507.2384  |           | 550.2806  | 533.2541  |
| 17 | 120.0808 | 1836.8399 | 1819.8133 | 1818.8293      | 1864.8348 | 1847.8082 | 1846.8242      |           |          | F    | 361.1653  |           |           | 453.2279  | 436.2013  |
| 18 | 104.0528 | 1967.8804 | 1950.8538 | 1949.8698      | 1995.8753 | 1978.8487 | 1977.8647      | 1907.8770 |          | M    | 230.1248  | 229.1295  |           | 306.1594  | 289.1329  |
| 19 | 129.1135 |           |           |                |           |           |                |           |          | R    | 74.0237   | 73.0284   |           | 175.1190  | 158.0924  |

| Seq   | ya       | yb       | Seq    | ya       | yb       | Seq  | ya       | yb       |
|-------|----------|----------|--------|----------|----------|------|----------|----------|
| GL    | 143.1179 | 171.1128 | GLD    | 258.1448 | 286.1397 | GLDF | 405.2132 | 433.2082 |
| GLDFT | 506.2609 | 534.2558 | GLDFTK | 634.3559 | 662.3508 | LD   | 201.1234 | 229.1183 |

|               |          |                 |               |          |                 |               |                 |                 |
|---------------|----------|-----------------|---------------|----------|-----------------|---------------|-----------------|-----------------|
| <b>LDL</b>    | 348.1918 | 376.1867        | <b>LDFT</b>   | 449.2395 | 477.2344        | <b>LDFTK</b>  | 577.3344        | 605.3293        |
| <b>LDFTKD</b> | 692.3614 | 720.3563        | <b>DF</b>     | 235.1077 | 263.1026        | <b>DFT</b>    | 336.1554        | 364.1503        |
| <b>DFTK</b>   | 464.2504 | 492.2453        | <b>DFTKD</b>  | 579.2773 | 607.2722        | <b>DFTKDD</b> | 694.3042        | 722.2992        |
| <b>FT</b>     | 221.1285 | 249.1234        | <b>FTK</b>    | 349.2234 | 377.2183        | <b>FTKD</b>   | 464.2504        | 492.2453        |
| <b>FTKDD</b>  | 579.2773 | 607.2722        | <b>TK</b>     | 202.1550 | <b>230.1499</b> | <b>TKD</b>    | 317.1819        | 345.1769        |
| <b>TKDD</b>   | 432.2089 | <b>460.2038</b> | <b>TKDDE</b>  | 561.2515 | 589.2464        | <b>TKDDEN</b> | 675.2944        | 703.2893        |
| <b>KD</b>     | 216.1343 | 244.1292        | <b>KDD</b>    | 331.1612 | 359.1561        | <b>KDDE</b>   | <b>460.2038</b> | 488.1987        |
| <b>KDDEN</b>  | 574.2467 | 602.2416        | <b>KDDENV</b> | 673.3151 | 701.3101        | <b>DD</b>     | 203.0662        | 231.0612        |
| <b>DDE</b>    | 332.1088 | 360.1038        | <b>DDEN</b>   | 446.1518 | 474.1467        | <b>DDENV</b>  | 545.2202        | 573.2151        |
| <b>DDENVN</b> | 659.2631 | 687.2580        | <b>DE</b>     | 217.0819 | 245.0768        | <b>DEN</b>    | 331.1248        | 359.1197        |
| <b>DENV</b>   | 430.1932 | 458.1882        | <b>DENVN</b>  | 544.2362 | 572.2311        | <b>DENVNS</b> | 631.2682        | 659.2631        |
| <b>EN</b>     | 216.0979 | 244.0928        | <b>ENV</b>    | 315.1663 | <b>343.1612</b> | <b>ENVN</b>   | 429.2092        | 457.2041        |
| <b>ENVNS</b>  | 516.2413 | 544.2362        | <b>ENVNSQ</b> | 644.2998 | 672.2947        | <b>NV</b>     | 186.1237        | 214.1186        |
| <b>NVN</b>    | 300.1666 | 328.1615        | <b>NVNS</b>   | 387.1987 | 415.1936        | <b>NVNSQ</b>  | 515.2572        | 543.2522        |
| <b>NVNSQP</b> | 612.3100 | 640.3049        | <b>VN</b>     | 186.1237 | 214.1186        | <b>VNS</b>    | 273.1557        | 301.1506        |
| <b>VNSQ</b>   | 401.2143 | 429.2092        | <b>VNSQP</b>  | 498.2671 | 526.2620        | <b>VNSQPF</b> | 645.3355        | 673.3304        |
| <b>NS</b>     | 174.0873 | 202.0822        | <b>NSQ</b>    | 302.1459 | 330.1408        | <b>NSQP</b>   | 399.1987        | 427.1936        |
| <b>NSQPF</b>  | 546.2671 | 574.2620        | <b>NSQPFM</b> | 677.3076 | 705.3025        | <b>SQ</b>     | 188.1030        | 216.0979        |
| <b>SQP</b>    | 285.1557 | 313.1506        | <b>SQPF</b>   | 432.2241 | <b>460.2191</b> | <b>SQPFM</b>  | 563.2646        | <b>591.2595</b> |
| <b>QP</b>     | 198.1237 | 226.1186        | <b>QPF</b>    | 345.1921 | 373.1870        | <b>QPFM</b>   | 476.2326        | 504.2275        |
| <b>PF</b>     | 217.1335 | 245.1285        | <b>PFM</b>    | 348.1740 | 376.1689        | <b>FM</b>     | 251.1213        | 279.1162        |

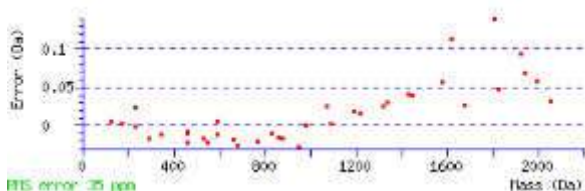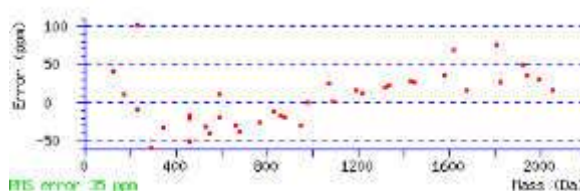

NCBI BLAST search of [GGLDFTKDDENVNSQPFMR](#)  
 (Parameters: blastp, nr protein database, expect=20000, no filter, PAM30)  
 Other BLAST [web gateways](#)

All matches to this query

| Score | Mr(calc)  | Delta  | Sequence                            |
|-------|-----------|--------|-------------------------------------|
| 137.3 | 2168.9797 | 0.1915 | <a href="#">GGLDFTKDDENVNSQPFMR</a> |
| 137.3 | 2168.9797 | 0.1915 | <a href="#">GGLDFTKDDENVNSQPFMR</a> |
| 137.3 | 2169.0161 | 0.1552 | <a href="#">GGLDFTKDDENVNSKPFMR</a> |
| 137.3 | 2168.9797 | 0.1915 | <a href="#">GGLDFTKDDENVNSQPFMR</a> |
| 137.3 | 2168.9797 | 0.1915 | <a href="#">GGLDFTKDDENVNSQPFMR</a> |
| 137.3 | 2168.9797 | 0.1915 | <a href="#">GGLDFTKDDENVNSQPFMR</a> |
| 137.3 | 2168.9797 | 0.1915 | <a href="#">GGLDFTKDDENVNSQPFMR</a> |
| 137.3 | 2168.9797 | 0.1915 | <a href="#">GGLDFTKDDENVNSQPFMR</a> |
| 137.3 | 2168.9797 | 0.1915 | <a href="#">GGLDFTKDDENVNSQPFMR</a> |
| 137.3 | 2168.9797 | 0.1915 | <a href="#">GGLDFTKDDENVNSQPFMR</a> |
| 137.3 | 2168.9797 | 0.1915 | <a href="#">GGLDFTKDDENVNSQPFMR</a> |

Mascot: <http://www.matrixscience.com/>

**MATRIX SCIENCE Mascot Search Results**

**Peptide View Spot no 138**

MS/MS Fragmentation of **LTYYTPEYETKDTDILAAFR**

Found in **gi|11466795** in **NCBI**nr, ribulose-1,5-bisphosphate carboxylase/oxygenase large subunit [Oryza sativa Japonica Group]

Match to Query 81: 2409.381124 from(2410.388400,1+) intensity(0.0000) index(27)

Title: Label: F12, Spot\_Id: 216658, Peak\_List\_Id: 221780, MSMS Job\_Run\_Id: 21391, Comment:

Data file C:\Documents and Settings\Administrator\Desktop\farah BHU\Cotton leaves\RAJESH\12-1-13 raj\ppw\_F12\_136117698300.txt

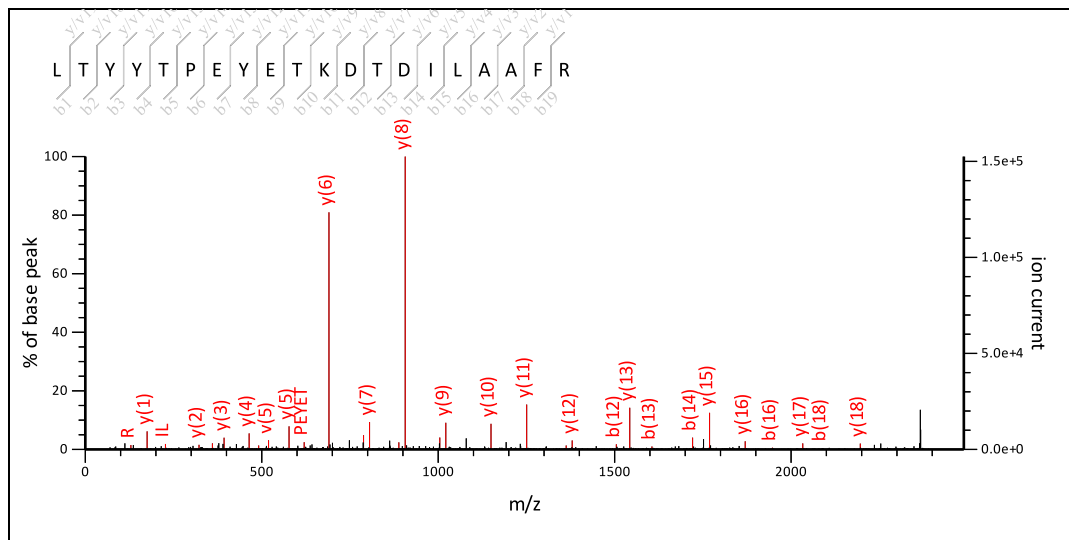

Navigation icons: Home, Back, Forward, Search, Print, Refresh, Stop. Range: 0 to 2489.53

Label all possible matches  Label matches used for scoring

Monoisotopic mass of neutral peptide Mr(calc): 2409.1740

Fixed modifications: Carbamidomethyl (C) (apply to specified residues or termini only)

Ions Score: 138 Expect: 5.2e-11

Matches : 38/356 fragment ions using 48 most intense peaks [\(help\)](#)

| #  | Immon.   | a         | a*        | a <sup>0</sup> | b         | b*        | b <sup>0</sup> | d         | d'        | Seq. | v         | w         | w'        | y         | y*        |
|----|----------|-----------|-----------|----------------|-----------|-----------|----------------|-----------|-----------|------|-----------|-----------|-----------|-----------|-----------|
| 1  | 86.0964  | 86.0964   |           |                | 114.0913  |           |                | 44.0495   |           | L    |           |           |           |           |           |
| 2  | 74.0600  | 187.1441  |           | 169.1335       | 215.1390  |           | 197.1285       | 171.1492  | 173.1285  | T    | 2251.0554 | 2264.0758 | 2266.0550 | 2297.0972 | 2280.0707 |
| 3  | 136.0757 | 350.2074  |           | 332.1969       | 378.2023  |           | 360.1918       |           |           | Y    | 2087.9920 |           |           | 2196.0495 | 2179.0230 |
| 4  | 136.0757 | 513.2708  |           | 495.2602       | 541.2657  |           | 523.2551       |           |           | Y    | 1924.9287 |           |           | 2032.9862 | 2015.9597 |
| 5  | 74.0600  | 614.3184  |           | 596.3079       | 642.3134  |           | 624.3028       | 598.3235  | 600.3028  | T    | 1823.8810 | 1836.9014 | 1838.8807 | 1869.9229 | 1852.8963 |
| 6  | 70.0651  | 711.3712  |           | 693.3606       | 739.3661  |           | 721.3556       | 685.3556  |           | P    | 1726.8283 | 1725.8330 |           | 1768.8752 | 1751.8487 |
| 7  | 102.0550 | 840.4138  |           | 822.4032       | 868.4087  |           | 850.3981       | 782.4083  |           | E    | 1597.7857 | 1596.7904 |           | 1671.8224 | 1654.7959 |
| 8  | 136.0757 | 1003.4771 |           | 985.4666       | 1031.4720 |           | 1013.4615      |           |           | Y    | 1434.7223 |           |           | 1542.7799 | 1525.7533 |
| 9  | 102.0550 | 1132.5197 |           | 1114.5092      | 1160.5146 |           | 1142.5041      | 1074.5142 |           | E    | 1305.6797 | 1304.6845 |           | 1379.7165 | 1362.6900 |
| 10 | 74.0600  | 1233.5674 |           | 1215.5568      | 1261.5623 |           | 1243.5517      | 1217.5725 | 1219.5517 | T    | 1204.6321 | 1217.6525 | 1219.6317 | 1250.6739 | 1233.6474 |
| 11 | 101.1073 | 1361.6624 | 1344.6358 | 1343.6518      | 1389.6573 | 1372.6307 | 1371.6467      | 1304.6045 |           | K    | 1076.5371 | 1075.5419 |           | 1149.6262 | 1132.5997 |
| 12 | 88.0393  | 1476.6893 | 1459.6628 | 1458.6787      | 1504.6842 | 1487.6577 | 1486.6737      | 1432.6995 |           | D    | 961.5102  | 960.5149  |           | 1021.5313 | 1004.5047 |
| 13 | 74.0600  | 1577.7370 | 1560.7104 | 1559.7264      | 1605.7319 | 1588.7054 | 1587.7213      | 1561.7421 | 1563.7213 | T    | 860.4625  | 873.4829  | 875.4621  | 906.5043  | 889.4778  |
| 14 | 88.0393  | 1692.7639 | 1675.7374 | 1674.7534      | 1720.7588 | 1703.7323 | 1702.7483      | 1648.7741 |           | D    | 745.4355  | 744.4403  |           | 805.4567  | 788.4301  |
| 15 | 86.0964  | 1805.8480 | 1788.8214 | 1787.8374      | 1833.8429 | 1816.8164 | 1815.8323      | 1777.8167 | 1791.8323 | I    | 632.3515  | 645.3719  | 659.3875  | 690.4297  | 673.4032  |
| 16 | 86.0964  | 1918.9321 | 1901.9055 | 1900.9215      | 1946.9270 | 1929.9004 | 1928.9164      | 1876.8851 |           | L    | 519.2674  | 518.2722  |           | 577.3457  | 560.3191  |
| 17 | 44.0495  | 1989.9692 | 1972.9426 | 1971.9586      | 2017.9641 | 2000.9375 | 1999.9535      |           |           | A    | 448.2303  |           |           | 464.2616  | 447.2350  |
| 18 | 44.0495  | 2061.0063 | 2043.9797 | 2042.9957      | 2089.0012 | 2071.9746 | 2070.9906      |           |           | A    | 377.1932  |           |           | 393.2245  | 376.1979  |
| 19 | 120.0808 | 2208.0747 | 2191.0481 | 2190.0641      | 2236.0696 | 2219.0431 | 2218.0590      |           |           | F    | 230.1248  |           |           | 322.1874  | 305.1608  |
| 20 | 129.1135 |           |           |                |           |           |                |           |           | R    | 74.0237   | 73.0284   |           | 175.1190  | 158.0924  |

| Seq | ya       | yb       | Seq | ya       | yb       | Seq | ya       | yb       |
|-----|----------|----------|-----|----------|----------|-----|----------|----------|
| TY  | 237.1234 | 265.1183 | TYT | 400.1867 | 428.1816 | TYT | 501.2344 | 529.2293 |



|               |          |                 |                |                 |                 |               |          |                 |
|---------------|----------|-----------------|----------------|-----------------|-----------------|---------------|----------|-----------------|
| <b>TYYP</b>   | 598.2871 | 626.2821        | <b>YY</b>      | 299.1390        | 327.1339        | <b>YYT</b>    | 400.1867 | 428.1816        |
| <b>YYTP</b>   | 497.2395 | 525.2344        | <b>YYTPE</b>   | 626.2821        | 654.2770        | <b>YT</b>     | 237.1234 | 265.1183        |
| <b>YTP</b>    | 334.1761 | 362.1710        | <b>YTPE</b>    | 463.2187        | <b>491.2136</b> | <b>YTPEY</b>  | 626.2821 | 654.2770        |
| <b>TP</b>     | 171.1128 | 199.1077        | <b>TPE</b>     | 300.1554        | 328.1503        | <b>TPEY</b>   | 463.2187 | <b>491.2136</b> |
| <b>TPEYE</b>  | 592.2613 | <b>620.2562</b> | <b>TPEYET</b>  | 693.3090        | 721.3039        | <b>PE</b>     | 199.1077 | <b>227.1026</b> |
| <b>PEY</b>    | 362.1710 | 390.1660        | <b>PEYE</b>    | <b>491.2136</b> | <b>519.2086</b> | <b>PEYET</b>  | 592.2613 | <b>620.2562</b> |
| <b>EY</b>     | 265.1183 | 293.1132        | <b>EYE</b>     | 394.1609        | 422.1558        | <b>EYET</b>   | 495.2086 | 523.2035        |
| <b>EYETK</b>  | 623.3035 | 651.2984        | <b>YE</b>      | 265.1183        | 293.1132        | <b>YET</b>    | 366.1660 | 394.1609        |
| <b>YETK</b>   | 494.2609 | 522.2558        | <b>YETKD</b>   | 609.2879        | 637.2828        | <b>ET</b>     | 203.1026 | 231.0975        |
| <b>ETK</b>    | 331.1976 | 359.1925        | <b>ETKD</b>    | 446.2245        | 474.2195        | <b>ETKDT</b>  | 547.2722 | 575.2671        |
| <b>ETKDTD</b> | 662.2992 | <b>690.2941</b> | <b>TK</b>      | 202.1550        | 230.1499        | <b>TKD</b>    | 317.1819 | 345.1769        |
| <b>TKDT</b>   | 418.2296 | 446.2245        | <b>TKDTD</b>   | 533.2566        | 561.2515        | <b>TKDTDI</b> | 646.3406 | 674.3355        |
| <b>KD</b>     | 216.1343 | 244.1292        | <b>KDT</b>     | 317.1819        | 345.1769        | <b>KDTD</b>   | 432.2089 | 460.2038        |
| <b>KDTDI</b>  | 545.2930 | 573.2879        | <b>KDTDIL</b>  | 658.3770        | 686.3719        | <b>DT</b>     | 189.0870 | 217.0819        |
| <b>DTD</b>    | 304.1139 | 332.1088        | <b>DTDIL</b>   | 417.1980        | 445.1929        | <b>DTDIL</b>  | 530.2821 | 558.2770        |
| <b>DTDILA</b> | 601.3192 | 629.3141        | <b>DTDILAA</b> | 672.3563        | 700.3512        | <b>TD</b>     | 189.0870 | 217.0819        |
| <b>TDI</b>    | 302.1710 | 330.1660        | <b>TDIL</b>    | 415.2551        | 443.2500        | <b>TDILA</b>  | 486.2922 | 514.2871        |
| <b>TDILAA</b> | 557.3293 | 585.3243        | <b>DI</b>      | 201.1234        | 229.1183        | <b>DIL</b>    | 314.2074 | 342.2023        |
| <b>DILA</b>   | 385.2445 | 413.2395        | <b>DILAA</b>   | 456.2817        | 484.2766        | <b>DILAAF</b> | 603.3501 | 631.3450        |
| <b>IL</b>     | 199.1805 | <b>227.1754</b> | <b>ILA</b>     | 270.2176        | 298.2125        | <b>ILAA</b>   | 341.2547 | 369.2496        |
| <b>ILAAF</b>  | 488.3231 | 516.3180        | <b>LA</b>      | 157.1335        | 185.1285        | <b>LAA</b>    | 228.1707 | 256.1656        |
| <b>LAAF</b>   | 375.2391 | 403.2340        | <b>AA</b>      | 115.0866        | 143.0815        | <b>AAF</b>    | 262.1550 | 290.1499        |
| <b>AF</b>     | 191.1179 | 219.1128        |                |                 |                 |               |          |                 |

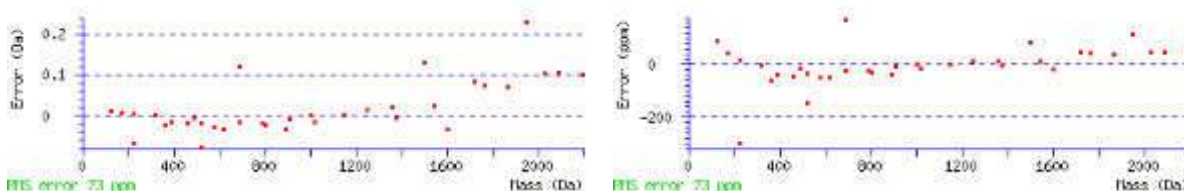

NCBI BLAST search of [LTYYPTEYETKDTDILAAFR](#)  
 (Parameters: blastp, nr protein database, expect=20000, no filter, PAM30)  
 Other BLAST [web gateways](#)

All matches to this query

| Score | Mr(calc)  | Delta  | Sequence                             |
|-------|-----------|--------|--------------------------------------|
| 137.9 | 2409.1740 | 0.2071 | <a href="#">LTYYPTEYETKDTDILAAFR</a> |
| 137.9 | 2409.1740 | 0.2071 | <a href="#">LTYYPTEYETKDTDILAAFR</a> |
| 137.9 | 2409.1740 | 0.2071 | <a href="#">LTYYPTEYETKDTDILAAFR</a> |
| 137.9 | 2409.1740 | 0.2071 | <a href="#">LTYYPTEYETKDTDILAAFR</a> |
| 137.9 | 2409.1740 | 0.2071 | <a href="#">LTYYPTEYETKDTDILAAFR</a> |
| 137.9 | 2409.1740 | 0.2071 | <a href="#">LTYYPTEYETKDTDILAAFR</a> |
| 137.9 | 2409.1740 | 0.2071 | <a href="#">LTYYPTEYETKDTDILAAFR</a> |
| 137.9 | 2409.1740 | 0.2071 | <a href="#">LTYYPTEYETKDTDILAAFR</a> |
| 137.9 | 2409.1740 | 0.2071 | <a href="#">LTYYPTEYETKDTDILAAFR</a> |
| 137.9 | 2409.1740 | 0.2071 | <a href="#">LTYYPTEYETKDTDILAAFR</a> |

Mascot: <http://www.matrixscience.com/>

**MATRIX SCIENCE Mascot Search Results**

**Peptide View Spot no 138**

MS/MS Fragmentation of **VTPQPGVPPEEAGAAVAESSTGTWTTVWTDGLTSLDR**

Found in **gi|11466795** in **NCBI**nr, ribulose-1,5-bisphosphate carboxylase/oxygenase large subunit [Oryza sativa Japonica Group]

Match to Query 98: 3854.228524 from(3855.235800,1+) intensity(0.0000) index(34)

Title: Label: F12, Spot\_Id: 216658, Peak\_List\_Id: 221796, MSMS Job\_Run\_Id: 21391, Comment:

Data file C:\Documents and Settings\Administrator\Desktop\farah BHU\Cotton leaves\RAJESH\12-1-13 raj\ppw\_F12\_136117698300.txt

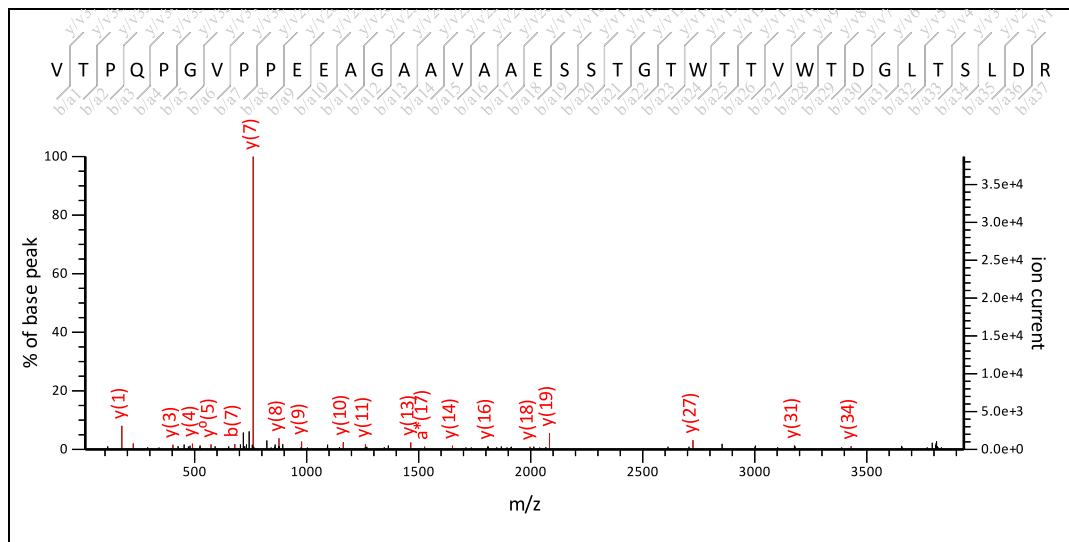

Navigation icons: Home, Back, Forward, Search, Print, Refresh. Range: 12.11 to 3933.21

Label all possible matches  Label matches used for scoring

Monoisotopic mass of neutral peptide Mr(calc): 3853.8647

Fixed modifications: Carbamidomethyl (C) (apply to specified residues or termini only)

Ions Score: 104 Expect: 8.1e-08

Matches : 29/837 fragment ions using 31 most intense peaks [\(help\)](#)

| #  | Immon.   | a         | a*               | a <sup>0</sup> | b               | b*        | b <sup>0</sup> | d         | d'        | Seq. | v                | w         | w'        | y                | y*        |
|----|----------|-----------|------------------|----------------|-----------------|-----------|----------------|-----------|-----------|------|------------------|-----------|-----------|------------------|-----------|
| 1  | 72.0808  | 72.0808   |                  |                | 100.0757        |           |                | 44.0495   |           | V    |                  |           |           |                  |           |
| 2  | 74.0600  | 173.1285  |                  | 155.1179       | 201.1234        |           | 183.1128       | 157.1335  | 159.1128  | T    | 3709.7616        | 3722.7820 | 3724.7613 | 3755.8035        | 3738.7770 |
| 3  | 70.0651  | 270.1812  |                  | 252.1707       | 298.1761        |           | 280.1656       | 244.1656  |           | P    | 3612.7089        | 3611.7136 |           | 3654.7558        | 3637.7293 |
| 4  | 101.0709 | 398.2398  | 381.2132         | 380.2292       | 426.2347        | 409.2082  | 408.2241       | 341.2183  |           | Q    | 3484.6503        | 3483.6551 |           | 3557.7031        | 3540.6765 |
| 5  | 70.0651  | 495.2926  | 478.2660         | 477.2820       | 523.2875        | 506.2609  | 505.2769       | 469.2769  |           | P    | <b>3387.5975</b> | 3386.6023 |           | <b>3429.6445</b> | 3412.6179 |
| 6  | 30.0338  | 552.3140  | 535.2875         | 534.3035       | 580.3089        | 563.2824  | 562.2984       |           |           | G    |                  |           |           | 3332.5917        | 3315.5652 |
| 7  | 72.0808  | 651.3824  | 634.3559         | 633.3719       | <b>679.3774</b> | 662.3508  | 661.3668       | 637.3668  |           | V    | 3231.5077        | 3244.5281 |           | 3275.5703        | 3258.5437 |
| 8  | 70.0651  | 748.4352  | 731.4087         | 730.4246       | 776.4301        | 759.4036  | 758.4196       | 722.4196  |           | P    | 3134.4549        | 3133.4596 |           | <b>3176.5018</b> | 3159.4753 |
| 9  | 70.0651  | 845.4880  | 828.4614         | 827.4774       | 873.4829        | 856.4563  | 855.4723       | 819.4723  |           | P    | 3037.4021        | 3036.4069 |           | 3079.4491        | 3062.4225 |
| 10 | 102.0550 | 974.5306  | 957.5040         | 956.5200       | 1002.5255       | 985.4989  | 984.5149       | 916.5251  |           | E    | 2908.3595        | 2907.3643 |           | 2982.3963        | 2965.3698 |
| 11 | 102.0550 | 1103.5732 | 1086.5466        | 1085.5626      | 1131.5681       | 1114.5415 | 1113.5575      | 1045.5677 |           | E    | 2779.3169        | 2778.3217 |           | 2853.3537        | 2836.3272 |
| 12 | 44.0495  | 1174.6103 | 1157.5837        | 1156.5997      | 1202.6052       | 1185.5786 | 1184.5946      |           |           | A    | 2708.2798        |           |           | <b>2724.3111</b> | 2707.2846 |
| 13 | 30.0338  | 1231.6317 | 1214.6052        | 1213.6212      | 1259.6266       | 1242.6001 | 1241.6161      |           |           | G    |                  |           |           | 2653.2740        | 2636.2475 |
| 14 | 44.0495  | 1302.6688 | 1285.6423        | 1284.6583      | 1330.6638       | 1313.6372 | 1312.6532      |           |           | A    | 2580.2213        |           |           | 2596.2526        | 2579.2260 |
| 15 | 44.0495  | 1373.7060 | 1356.6794        | 1355.6954      | 1401.7009       | 1384.6743 | 1383.6903      |           |           | A    | 2509.1841        |           |           | 2525.2154        | 2508.1889 |
| 16 | 72.0808  | 1472.7744 | 1455.7478        | 1454.7638      | 1500.7693       | 1483.7427 | 1482.7587      | 1458.7587 |           | V    | 2410.1157        | 2423.1361 |           | 2454.1783        | 2437.1518 |
| 17 | 44.0495  | 1543.8115 | <b>1526.7849</b> | 1525.8009      | 1571.8064       | 1554.7799 | 1553.7958      |           |           | A    | 2339.0786        |           |           | 2355.1099        | 2338.0834 |
| 18 | 44.0495  | 1614.8486 | 1597.8221        | 1596.8380      | 1642.8435       | 1625.8170 | 1624.8329      |           |           | A    | 2268.0415        |           |           | 2284.0728        | 2267.0462 |
| 19 | 102.0550 | 1743.8912 | 1726.8646        | 1725.8806      | 1771.8861       | 1754.8596 | 1753.8755      | 1685.8857 |           | E    | 2138.9989        | 2138.0037 |           | 2213.0357        | 2196.0091 |
| 20 | 60.0444  | 1830.9232 | 1813.8967        | 1812.9127      | 1858.9181       | 1841.8916 | 1840.9076      | 1814.9283 |           | S    | 2051.9669        | 2050.9716 |           | <b>2083.9931</b> | 2066.9665 |
| 21 | 60.0444  | 1917.9552 | 1900.9287        | 1899.9447      | 1945.9502       | 1928.9236 | 1927.9396      | 1901.9603 |           | S    | 1964.9348        | 1963.9396 |           | <b>1996.9611</b> | 1979.9345 |
| 22 | 74.0600  | 2019.0029 | 2001.9764        | 2000.9924      | 2046.9978       | 2029.9713 | 2028.9873      | 2003.0080 | 2004.9873 | T    | 1863.8872        | 1876.9076 | 1878.8868 | 1909.9290        | 1892.9025 |





|         |          |          |        |          |          |         |          |          |
|---------|----------|----------|--------|----------|----------|---------|----------|----------|
| AESSTGT | 606.2729 | 634.2679 | ES     | 189.0870 | 217.0819 | ESS     | 276.1190 | 304.1139 |
| ESST    | 377.1667 | 405.1616 | ESSTG  | 434.1882 | 462.1831 | ESSTGT  | 535.2358 | 563.2307 |
| SS      | 147.0764 | 175.0713 | SST    | 248.1241 | 276.1190 | SSTG    | 305.1456 | 333.1405 |
| SSTGT   | 406.1932 | 434.1882 | SSTGTW | 592.2726 | 620.2675 | SSTGTWT | 693.3202 | 721.3151 |
| ST      | 161.0921 | 189.0870 | STG    | 218.1135 | 246.1084 | STGT    | 319.1612 | 347.1561 |
| STGTW   | 505.2405 | 533.2354 | STGTWT | 606.2882 | 634.2831 | TG      | 131.0815 | 159.0764 |
| TGT     | 232.1292 | 260.1241 | TGTW   | 418.2085 | 446.2034 | TGTWT   | 519.2562 | 547.2511 |
| TGTWTT  | 620.3039 | 648.2988 | GT     | 131.0815 | 159.0764 | GTW     | 317.1608 | 345.1557 |
| GTWT    | 418.2085 | 446.2034 | GTWTT  | 519.2562 | 547.2511 | GTWTTV  | 618.3246 | 646.3195 |
| TW      | 260.1394 | 288.1343 | TWT    | 361.1870 | 389.1819 | TWTT    | 462.2347 | 490.2296 |
| TWTTV   | 561.3031 | 589.2980 | WT     | 260.1394 | 288.1343 | WTT     | 361.1870 | 389.1819 |
| WTTV    | 460.2554 | 488.2504 | WTTVW  | 646.3348 | 674.3297 | TT      | 175.1077 | 203.1026 |
| TTV     | 274.1761 | 302.1710 | TTVW   | 460.2554 | 488.2504 | TTVWT   | 561.3031 | 589.2980 |
| TTVWTD  | 676.3301 | 704.3250 | TV     | 173.1285 | 201.1234 | TVW     | 359.2078 | 387.2027 |
| TVWT    | 460.2554 | 488.2504 | TVWTD  | 575.2824 | 603.2773 | TVWTDG  | 632.3039 | 660.2988 |
| VW      | 258.1601 | 286.1550 | VWT    | 359.2078 | 387.2027 | VWTD    | 474.2347 | 502.2296 |
| VWTDG   | 531.2562 | 559.2511 | VWTDGL | 644.3402 | 672.3352 | WT      | 260.1394 | 288.1343 |
| WTD     | 375.1663 | 403.1612 | WTDG   | 432.1878 | 460.1827 | WTDGL   | 545.2718 | 573.2667 |
| WTDGLT  | 646.3195 | 674.3144 | TD     | 189.0870 | 217.0819 | TDG     | 246.1084 | 274.1034 |
| TDGL    | 359.1925 | 387.1874 | TDGLT  | 460.2402 | 488.2351 | TDGLTS  | 547.2722 | 575.2671 |
| TDGLTSL | 660.3563 | 688.3512 | DG     | 145.0608 | 173.0557 | DGL     | 258.1448 | 286.1397 |
| DGLT    | 359.1925 | 387.1874 | DGLTS  | 446.2245 | 474.2195 | DGLTSL  | 559.3086 | 587.3035 |
| DGLTSLD | 674.3355 | 702.3305 | GL     | 143.1179 | 171.1128 | GLT     | 244.1656 | 272.1605 |
| GLTS    | 331.1976 | 359.1925 | GLTSL  | 444.2817 | 472.2766 | GLTSLD  | 559.3086 | 587.3035 |
| LT      | 187.1441 | 215.1390 | LTS    | 274.1761 | 302.1710 | LTSL    | 387.2602 | 415.2551 |
| LTSLD   | 502.2871 | 530.2821 | TS     | 161.0921 | 189.0870 | TSL     | 274.1761 | 302.1710 |
| TSLD    | 389.2031 | 417.1980 | SL     | 173.1285 | 201.1234 | SLD     | 288.1554 | 316.1503 |
| LD      | 201.1234 | 229.1183 |        |          |          |         |          |          |

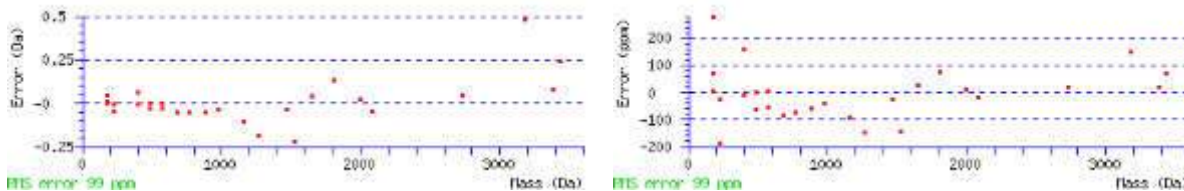

NCBI BLAST search of [VTPOPGVPPEEAGA AVAAESSTGTWTTVWTDGLTSLDR](#)  
 (Parameters: blastp, nr protein database, expect=20000, no filter, PAM30)  
 Other BLAST [web gateways](#)

All matches to this query

| Score | Mr(calcd) | Delta   | Sequence                                                 |
|-------|-----------|---------|----------------------------------------------------------|
| 121.0 | 3854.8487 | -0.6202 | <a href="#">VTPEPGVPPEEAGA AVAAESSTGTWTTVWTDGLTSLDR</a>  |
| 121.0 | 3854.8487 | -0.6202 | <a href="#">VTPEPGVPPEEAGA AVAAESSTGTWTTVWTDGLTSLDR</a>  |
| 110.7 | 3854.9075 | -0.6790 | <a href="#">VTPOPGVPAERAGA AVAAESSTGTWTTVWTDGLTSLDR</a>  |
| 110.7 | 3854.9075 | -0.6790 | <a href="#">VTPOPGVPAREAGA AVAAESSTGTWTTVWTDGLTSLDR</a>  |
| 104.0 | 3853.9011 | 0.3275  | <a href="#">VTPKPGVPPEEAGA AVAAESSTGTWTTVWTDGLTSLDR</a>  |
| 104.0 | 3853.8647 | 0.3638  | <a href="#">VTPOPGVPPEEAGA AVAAESSTGTWTTVWTDGITS LDR</a> |
| 104.0 | 3853.8647 | 0.3638  | <a href="#">VTPOPGVPPEEAGA AVAAESSTGTWTTVWTDGITS LDR</a> |
| 104.0 | 3853.8647 | 0.3638  | <a href="#">VTPOPGVPPEEAGA AVAAESSTGTWTTVWTDGLTSLDR</a>  |
| 104.0 | 3853.8647 | 0.3638  | <a href="#">VTPOPGVPPEEAGA AVAAESSTGTWTTVWTDGLTSLDR</a>  |
| 104.0 | 3853.8647 | 0.3638  | <a href="#">VTPOPGVPPEEAGA AVAAESSTGTWTTVWTDGLTSLDR</a>  |

Mascot: <http://www.matrixscience.com/>



# Mascot Search Results

## Peptide View **Spot no 144**

### MS/MS Fragmentation of **VYLGPEPTR**

Found in **gi|11466848** in **NCBI**nr, photosystem I subunit VII [Oryza sativa Japonica Group]

Match to Query 92: 1034.576824 from(1035.584100,1+) intensity(0.0000) index(7)

Title: Label: N13, Spot\_Id: 219879, Peak\_List\_Id: 228110, MSMS Job\_Run\_Id: 21981, Comment:

Data file C:\Documents and Settings\Administrator\Desktop\Farah-Garima 11May 2013\ppw\_N13\_136868255600.txt

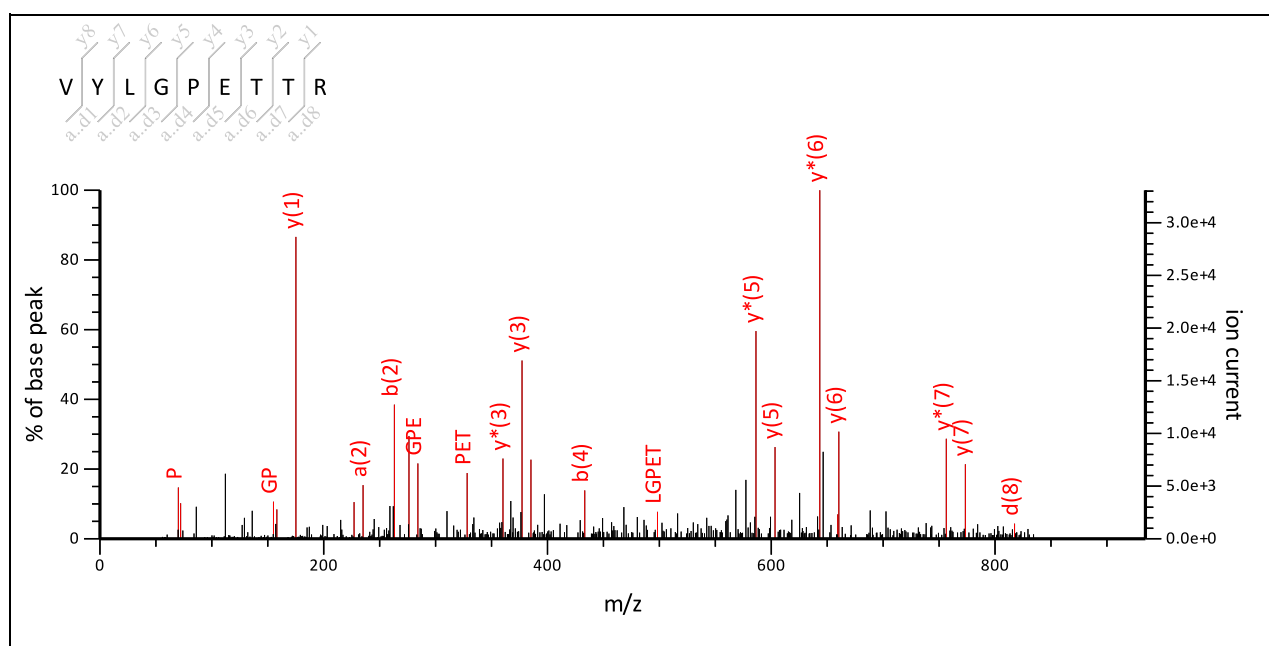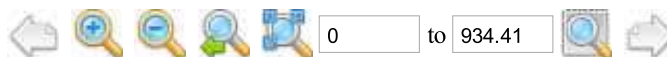

Label all possible matches  Label matches used for scoring

**Monoisotopic mass of neutral peptide Mr(calc):** 1034.5397

**Fixed modifications:** Carbamidomethyl (C) (apply to specified residues or termini only)

**Ions Score:** 45 **Expect:** 1.2

**Matches:** 26/117 fragment ions using 32 most intense peaks ([help](#))

| # | Immon.   | a        | a <sup>0</sup> | b        | b <sup>0</sup> | d        | d'       | Seq. | v        | w        | w'       | y        | y*       | y <sup>0</sup> | # |
|---|----------|----------|----------------|----------|----------------|----------|----------|------|----------|----------|----------|----------|----------|----------------|---|
| 1 | 72.0808  | 72.0808  |                | 100.0757 |                | 44.0495  |          | V    |          |          |          |          |          |                | 9 |
| 2 | 136.0757 | 235.1441 |                | 263.1390 |                |          |          | Y    | 828.4210 |          |          | 936.4785 | 919.4520 | 918.4680       | 8 |
| 3 | 86.0964  | 348.2282 |                | 376.2231 |                | 306.1812 |          | L    | 715.3369 | 714.3417 |          | 773.4152 | 756.3886 | 755.4046       | 7 |
| 4 | 30.0338  | 405.2496 |                | 433.2445 |                |          |          | G    |          |          |          | 660.3311 | 643.3046 | 642.3206       | 6 |
| 5 | 70.0651  | 502.3024 |                | 530.2973 |                | 476.2867 |          | P    | 561.2627 | 560.2675 |          | 603.3097 | 586.2831 | 585.2991       | 5 |
| 6 | 102.0550 | 631.3450 | 613.3344       | 659.3399 | 641.3293       | 573.3395 |          | E    | 432.2201 | 431.2249 |          | 506.2569 | 489.2304 | 488.2463       | 4 |
| 7 | 74.0600  | 732.3927 | 714.3821       | 760.3876 | 742.3770       | 716.3978 | 718.3770 | T    | 331.1724 | 344.1928 | 346.1721 | 377.2143 | 360.1878 | 359.2037       | 3 |
| 8 | 74.0600  | 833.4403 | 815.4298       | 861.4353 | 843.4247       | 817.4454 | 819.4247 | T    | 230.1248 | 243.1452 | 245.1244 | 276.1666 | 259.1401 | 258.1561       | 2 |
| 9 | 129.1135 |          |                |          |                |          |          | R    | 74.0237  | 73.0284  |          | 175.1190 | 158.0924 |                | 1 |

| Seq   | ya       | yb       | Seq   | ya       | yb       | Seq   | ya       | yb       |
|-------|----------|----------|-------|----------|----------|-------|----------|----------|
| YL    | 249.1598 | 277.1547 | YLG   | 306.1812 | 334.1761 | YLGPE | 403.2340 | 431.2289 |
| YLGPE | 532.2766 | 560.2715 | YLGPE | 633.3243 | 661.3192 | LG    | 143.1179 | 171.1128 |
| LGP   | 240.1707 | 268.1656 | LGPE  | 369.2132 | 397.2082 | LGPE  | 470.2609 | 498.2558 |

|               |          |                 |              |                 |                 |            |          |                 |
|---------------|----------|-----------------|--------------|-----------------|-----------------|------------|----------|-----------------|
| <b>LGPETT</b> | 571.3086 | 599.3035        | <b>GP</b>    | 127.0866        | <b>155.0815</b> | <b>GPE</b> | 256.1292 | <b>284.1241</b> |
| <b>GPET</b>   | 357.1769 | <b>385.1718</b> | <b>GPETT</b> | 458.2245        | 486.2195        | <b>PE</b>  | 199.1077 | <b>227.1026</b> |
| <b>PET</b>    | 300.1554 | <b>328.1503</b> | <b>PETT</b>  | 401.2031        | 429.1980        | <b>ET</b>  | 203.1026 | 231.0975        |
| <b>ETT</b>    | 304.1503 | 332.1452        | <b>TT</b>    | <b>175.1077</b> | 203.1026        |            |          |                 |

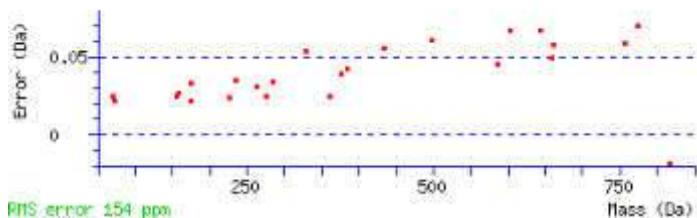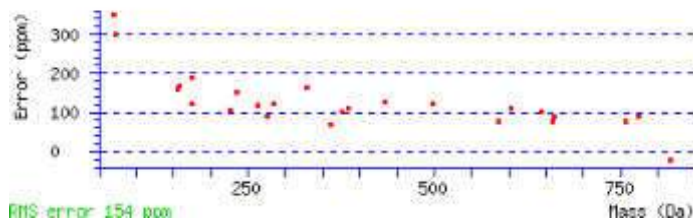

NCBI **BLAST** search of [VYLGPESTR](#)

(Parameters: blastp, nr protein database, expect=20000, no filter, PAM30)

Other BLAST [web gateways](#)

#### All matches to this query

| Score | Mr(calc)  | Delta  | Sequence                   |
|-------|-----------|--------|----------------------------|
| 44.8  | 1034.5397 | 0.0372 | <a href="#">VYLGPESTR</a>  |
| 41.0  | 1034.5430 | 0.0338 | <a href="#">MDIGITTR</a>   |
| 35.4  | 1034.4889 | 0.0879 | <a href="#">DMLGSMLPR</a>  |
| 32.5  | 1034.4855 | 0.0913 | <a href="#">MDLPWTTR</a>   |
| 31.6  | 1034.5760 | 0.0008 | <a href="#">YVLGLLDSR</a>  |
| 27.3  | 1034.5067 | 0.0702 | <a href="#">MDLGLVDTR</a>  |
| 24.7  | 1034.4855 | 0.0913 | <a href="#">AMDVSFPPR</a>  |
| 24.4  | 1034.5509 | 0.0259 | <a href="#">VHPVPETTR</a>  |
| 24.2  | 1034.4815 | 0.0953 | <a href="#">MDLQQAQTR</a>  |
| 24.2  | 1034.5509 | 0.0259 | <a href="#">YVLGAQGATR</a> |

Mascot: <http://www.matrixscience.com/>



# Mascot Search Results

## Peptide View **Spot no 144**

### MS/MS Fragmentation of **TEDCVGCKR**

Found in **gi|11466848** in **NCBI nr**, photosystem I subunit VII [Oryza sativa Japonica Group]

Match to Query 146: 1123.525024 from(1124.532300,1+) intensity(0.0000) index(14)

Title: Label: N13, Spot\_Id: 219879, Peak\_List\_Id: 228117, MSMS Job\_Run\_Id: 21981, Comment:

Data file C:\Documents and Settings\Administrator\Desktop\Farah-Garima 11May 2013\ppw\_N13\_136868255600.txt

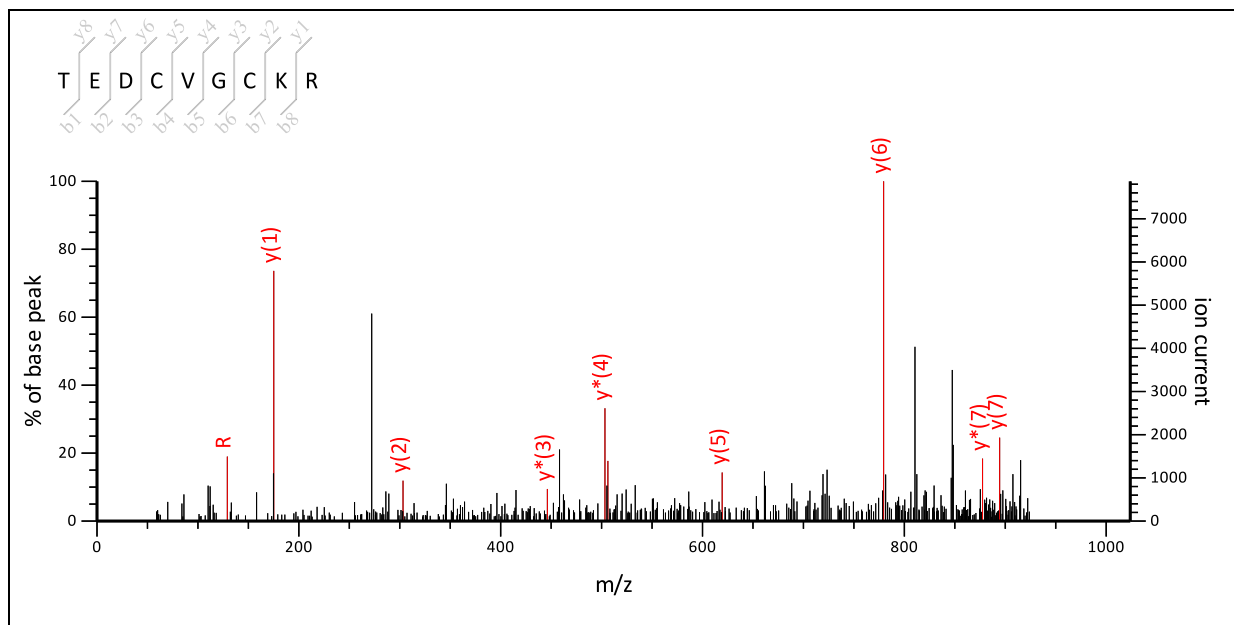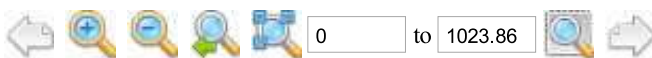

Label all possible matches  Label matches used for scoring

**Monoisotopic mass of neutral peptide Mr(calc):** 1123.4750

**Fixed modifications:** Carbamidomethyl (C) (apply to specified residues or termini only)

**Ions Score:** 25 **Expect:** 1.1e+02

**Matches:** 11/120 fragment ions using 18 most intense peaks ([help](#))

| # | Immon.          | a        | a*       | a <sup>0</sup> | b               | b*       | b <sup>0</sup> | d        | Seq. | v        | w        | y               | y*              | y <sup>0</sup> | # |
|---|-----------------|----------|----------|----------------|-----------------|----------|----------------|----------|------|----------|----------|-----------------|-----------------|----------------|---|
| 1 | 74.0600         | 74.0600  |          | 56.0495        | 102.0550        |          | 84.0444        | 44.0495  | T    |          |          |                 |                 |                | 9 |
| 2 | 102.0550        | 203.1026 |          | 185.0921       | 231.0975        |          | 213.0870       | 145.0972 | E    | 949.3978 | 948.4026 | 1023.4346       | 1006.4081       | 1005.4241      | 8 |
| 3 | 88.0393         | 318.1296 |          | 300.1190       | 346.1245        |          | 328.1139       | 274.1397 | D    | 834.3709 | 833.3757 | <b>894.3920</b> | <b>877.3655</b> | 876.3815       | 7 |
| 4 | 133.0430        | 478.1602 |          | 460.1497       | <b>506.1551</b> |          | 488.1446       | 389.1667 | C    | 674.3403 | 673.3450 | <b>779.3651</b> | 762.3385        |                | 6 |
| 5 | 72.0808         | 577.2286 |          | 559.2181       | 605.2236        |          | 587.2130       | 563.2130 | V    | 575.2718 | 588.2922 | <b>619.3344</b> | 602.3079        |                | 5 |
| 6 | 30.0338         | 634.2501 |          | 616.2395       | 662.2450        |          | 644.2345       |          | G    |          |          | 520.2660        | <b>503.2395</b> |                | 4 |
| 7 | 133.0430        | 794.2808 |          | 776.2702       | 822.2757        |          | 804.2651       | 705.2872 | C    | 358.2197 | 357.2245 | 463.2446        | <b>446.2180</b> |                | 3 |
| 8 | 101.1073        | 922.3757 | 905.3492 | 904.3652       | 950.3706        | 933.3441 | 932.3601       | 865.3179 | K    | 230.1248 | 229.1295 | <b>303.2139</b> | 286.1874        |                | 2 |
| 9 | <b>129.1135</b> |          |          |                |                 |          |                |          | R    | 74.0237  | 73.0284  | <b>175.1190</b> | 158.0924        |                | 1 |

| Seq    | ya       | yb       | Seq    | ya       | yb       | Seq   | ya       | yb       |
|--------|----------|----------|--------|----------|----------|-------|----------|----------|
| ED     | 217.0819 | 245.0768 | EDC    | 377.1125 | 405.1075 | EDCV  | 476.1810 | 504.1759 |
| EDCVG  | 533.2024 | 561.1973 | EDCVGC | 693.2331 | 721.2280 | DC    | 248.0700 | 276.0649 |
| DCV    | 347.1384 | 375.1333 | DCVG   | 404.1598 | 432.1547 | DCVGC | 564.1905 | 592.1854 |
| DCVGCK | 692.2854 | 720.2804 | CV     | 232.1114 | 260.1063 | CVG   | 289.1329 | 317.1278 |

|                      |          |          |                       |          |          |                    |                          |          |
|----------------------|----------|----------|-----------------------|----------|----------|--------------------|--------------------------|----------|
| <a href="#">CVGC</a> | 449.1635 | 477.1585 | <a href="#">CVGCK</a> | 577.2585 | 605.2534 | <a href="#">VG</a> | <a href="#">129.1022</a> | 157.0972 |
| <a href="#">VGC</a>  | 289.1329 | 317.1278 | <a href="#">VGCK</a>  | 417.2279 | 445.2228 | <a href="#">GC</a> | 190.0645                 | 218.0594 |
| <a href="#">GCK</a>  | 318.1594 | 346.1544 | <a href="#">CK</a>    | 261.1380 | 289.1329 |                    |                          |          |

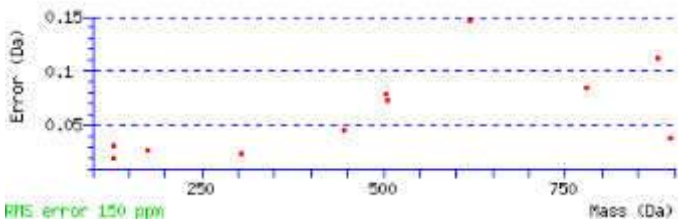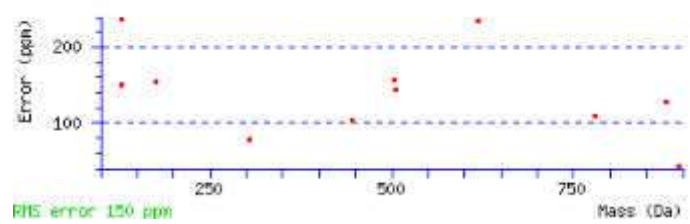

NCBI **BLAST** search of [TEDCVGCKR](#)

(Parameters: blastp, nr protein database, expect=20000, no filter, PAM30)

Other BLAST [web gateways](#)

#### All matches to this query

| Score | Mr(calc)  | Delta   | Sequence                   |
|-------|-----------|---------|----------------------------|
| 26.7  | 1123.4928 | 0.0323  | <a href="#">ETDMETARR</a>  |
| 24.7  | 1123.4750 | 0.0500  | <a href="#">TEDCVGCKR</a>  |
| 24.7  | 1123.4750 | 0.0500  | <a href="#">TEDCVGCKR</a>  |
| 24.7  | 1123.4750 | 0.0500  | <a href="#">TEDCVGCKR</a>  |
| 24.7  | 1123.4387 | 0.0864  | <a href="#">TEDCVGCQR</a>  |
| 24.0  | 1123.4240 | 0.1010  | <a href="#">DDDFNMDPR</a>  |
| 24.0  | 1123.5873 | -0.0623 | <a href="#">ETPPLEVSPR</a> |
| 24.0  | 1123.4894 | 0.0356  | <a href="#">ETPSHDADPR</a> |
| 23.6  | 1123.5873 | -0.0623 | <a href="#">ETDYLIKSR</a>  |
| 23.6  | 1123.5332 | -0.0082 | <a href="#">YMDFEAGLSR</a> |

Mascot: <http://www.matrixscience.com/>




**Mascot Search Results**
**Peptide View**    **Spot no 144**
MS/MS Fragmentation of **CESACPTDFLSVR**Found in **gi11466848** in **NCBI**nr, photosystem I subunit VII [Oryza sativa Japonica Group]

Match to Query 266: 1540.737724 from(1541.745000,1+) intensity(0.0000) index(31)

Title: Label: N13, Spot\_Id: 219879, Peak\_List\_Id: 228112, MSMS Job\_Run\_Id: 21981, Comment:

Data file C:\Documents and Settings\Administrator\Desktop\Farah-Garima 11May 2013\ppw\_N13\_136868255600.txt

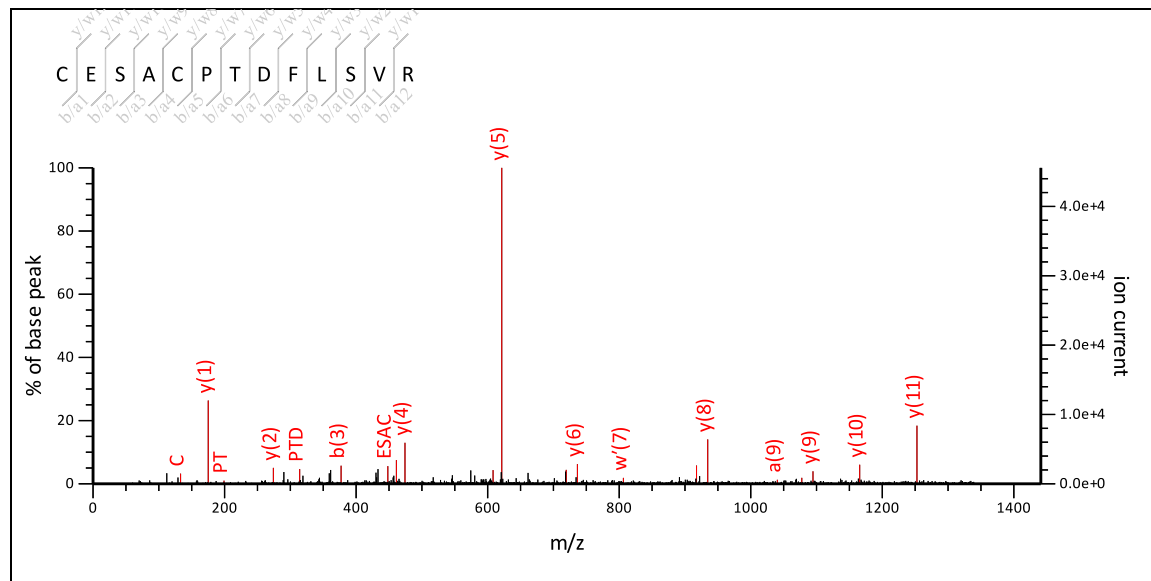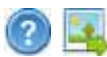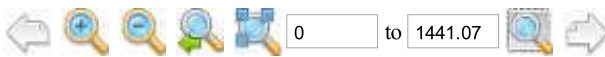Label all possible matches  Label matches used for scoring 

Monoisotopic mass of neutral peptide Mr(calc): 1540.6650

Fixed modifications: Carbamidomethyl (C) (apply to specified residues or termini only)

Ions Score: 79    Expect: 0.0004

Matches : 27/205 fragment ions using 26 most intense peaks ([help](#))

| #  | Immon.   | a         | a <sup>0</sup> | b         | b <sup>0</sup> | d         | d'       | Seq. | v         | w         | w'       | y         | y*        | y <sup>0</sup> | #  |
|----|----------|-----------|----------------|-----------|----------------|-----------|----------|------|-----------|-----------|----------|-----------|-----------|----------------|----|
| 1  | 133.0430 | 133.0430  |                | 161.0379  |                | 44.0495   |          | C    |           |           |          |           |           |                | 13 |
| 2  | 102.0550 | 262.0856  | 244.0750       | 290.0805  | 272.0700       | 204.0801  |          | E    | 1307.6049 | 1306.6096 |          | 1381.6416 | 1364.6151 | 1363.6311      | 12 |
| 3  | 60.0444  | 349.1176  | 331.1071       | 377.1125  | 359.1020       | 333.1227  |          | S    | 1220.5728 | 1219.5776 |          | 1252.5990 | 1235.5725 | 1234.5885      | 11 |
| 4  | 44.0495  | 420.1547  | 402.1442       | 448.1497  | 430.1391       |           |          | A    | 1149.5357 |           |          | 1165.5670 | 1148.5405 | 1147.5565      | 10 |
| 5  | 133.0430 | 580.1854  | 562.1748       | 608.1803  | 590.1697       | 491.1919  |          | C    | 989.5051  | 988.5098  |          | 1094.5299 | 1077.5034 | 1076.5193      | 9  |
| 6  | 70.0651  | 677.2382  | 659.2276       | 705.2331  | 687.2225       | 651.2225  |          | P    | 892.4523  | 891.4571  |          | 934.4993  | 917.4727  | 916.4887       | 8  |
| 7  | 74.0600  | 778.2858  | 760.2753       | 806.2808  | 788.2702       | 762.2909  | 764.2702 | T    | 791.4046  | 804.4250  | 806.4043 | 837.4465  | 820.4199  | 819.4359       | 7  |
| 8  | 88.0393  | 893.3128  | 875.3022       | 921.3077  | 903.2971       | 849.3230  |          | D    | 676.3777  | 675.3824  |          | 736.3988  | 719.3723  | 718.3882       | 6  |
| 9  | 120.0808 | 1040.3812 | 1022.3706      | 1068.3761 | 1050.3655      |           |          | F    | 529.3093  |           |          | 621.3719  | 604.3453  | 603.3613       | 5  |
| 10 | 86.0964  | 1153.4653 | 1135.4547      | 1181.4602 | 1163.4496      | 1111.4183 |          | L    | 416.2252  | 415.2300  |          | 474.3035  | 457.2769  | 456.2929       | 4  |
| 11 | 60.0444  | 1240.4973 | 1222.4867      | 1268.4922 | 1250.4816      | 1224.5024 |          | S    | 329.1932  | 328.1979  |          | 361.2194  | 344.1928  | 343.2088       | 3  |
| 12 | 72.0808  | 1339.5657 | 1321.5551      | 1367.5606 | 1349.5501      | 1325.5501 |          | V    | 230.1248  | 243.1452  |          | 274.1874  | 257.1608  |                | 2  |
| 13 | 129.1135 |           |                |           |                |           |          | R    | 74.0237   | 73.0284   |          | 175.1190  | 158.0924  |                | 1  |

| Seq    | ya       | yb       | Seq    | ya       | yb       | Seq   | ya       | yb       |
|--------|----------|----------|--------|----------|----------|-------|----------|----------|
| ES     | 189.0870 | 217.0819 | ESA    | 260.1241 | 288.1190 | ESAC  | 420.1547 | 448.1497 |
| ESACP  | 517.2075 | 545.2024 | ESACPT | 618.2552 | 646.2501 | SA    | 131.0815 | 159.0764 |
| SAC    | 291.1122 | 319.1071 | SACP   | 388.1649 | 416.1598 | SACPT | 489.2126 | 517.2075 |
| SACPTD | 604.2395 | 632.2345 | AC     | 204.0801 | 232.0750 | ACP   | 301.1329 | 329.1278 |



|              |          |                 |               |          |                 |               |          |                 |
|--------------|----------|-----------------|---------------|----------|-----------------|---------------|----------|-----------------|
| <b>ACPT</b>  | 402.1806 | 430.1755        | <b>ACPTD</b>  | 517.2075 | 545.2024        | <b>ACPTDF</b> | 664.2759 | 692.2708        |
| <b>CP</b>    | 230.0958 | 258.0907        | <b>CPT</b>    | 331.1435 | 359.1384        | <b>CPTD</b>   | 446.1704 | <b>474.1653</b> |
| <b>CPTDF</b> | 593.2388 | <b>621.2337</b> | <b>PT</b>     | 171.1128 | <b>199.1077</b> | <b>PTD</b>    | 286.1397 | <b>314.1347</b> |
| <b>PTDF</b>  | 433.2082 | <b>461.2031</b> | <b>PTDFL</b>  | 546.2922 | 574.2871        | <b>PTDFLS</b> | 633.3243 | 661.3192        |
| <b>TD</b>    | 189.0870 | 217.0819        | <b>TDF</b>    | 336.1554 | 364.1503        | <b>TDFL</b>   | 449.2395 | 477.2344        |
| <b>TDFLS</b> | 536.2715 | 564.2664        | <b>TDFLSV</b> | 635.3399 | 663.3348        | <b>DF</b>     | 235.1077 | 263.1026        |
| <b>DFL</b>   | 348.1918 | 376.1867        | <b>DFLS</b>   | 435.2238 | 463.2187        | <b>DFLSV</b>  | 534.2922 | 562.2871        |
| <b>FL</b>    | 233.1648 | 261.1598        | <b>FLS</b>    | 320.1969 | 348.1918        | <b>FLSV</b>   | 419.2653 | 447.2602        |
| <b>LS</b>    | 173.1285 | 201.1234        | <b>LSV</b>    | 272.1969 | 300.1918        | <b>SV</b>     | 159.1128 | 187.1077        |

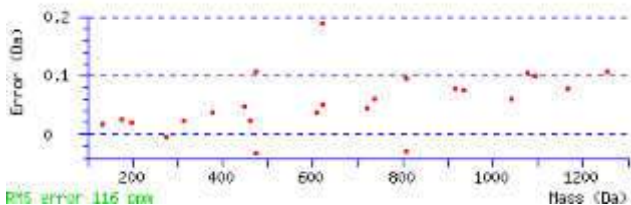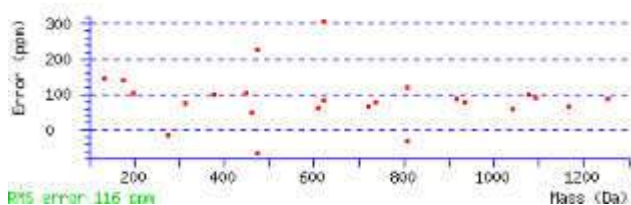

NCBI BLAST search of [CESACPTDFLSVR](#)

(Parameters: blastp, nr protein database, expect=20000, no filter, PAM30)

Other BLAST [web gateways](#)

#### All matches to this query

| Score | Mr(calc)  | Delta   | Sequence                        |
|-------|-----------|---------|---------------------------------|
| 78.9  | 1540.6650 | 0.0727  | <a href="#">CESACPTDFLSVR</a>   |
| 31.3  | 1540.7522 | -0.0144 | <a href="#">LFGGNETDYALSVR</a>  |
| 29.4  | 1540.7960 | -0.0582 | <a href="#">GMELEIVDFLSVR</a>   |
| 29.4  | 1540.7047 | 0.0330  | <a href="#">LRMMEIDMAEVR</a>    |
| 27.3  | 1540.7634 | -0.0257 | <a href="#">KSGTOFSGPTGYGVR</a> |
| 27.3  | 1540.6902 | 0.0476  | <a href="#">AMVAEMFGQEVADK</a>  |
| 26.9  | 1540.7331 | 0.0046  | <a href="#">IIDFSEMTLVDK</a>    |
| 26.8  | 1540.8144 | -0.0767 | <a href="#">HRPGVSISMSLSVR</a>  |
| 25.8  | 1540.7456 | -0.0079 | <a href="#">VNYACKQAGIFDR</a>   |
| 23.8  | 1540.7490 | -0.0113 | <a href="#">MAANNKYQMVISR</a>   |

Mascot: <http://www.matrixscience.com/>

**MATRIX SCIENCE Mascot Search Results**

**Peptide View Spot no 144**

MS/MS Fragmentation of **IYDTCIGCTQCVR**

Found in **gi|11466848** in **NCBI nr**, photosystem I subunit VII [Oryza sativa Japonica Group]

Match to Query 278: 1644.784724 from(1645.792000,1+) intensity(0.0000) index(32)

Title: Label: N13, Spot\_Id: 219879, Peak\_List\_Id: 228111, MSMS Job\_Run\_Id: 21981, Comment:

Data file C:\Documents and Settings\Administrator\Desktop\Farah-Garima 11May 2013\ppw\_N13\_136868255600.txt

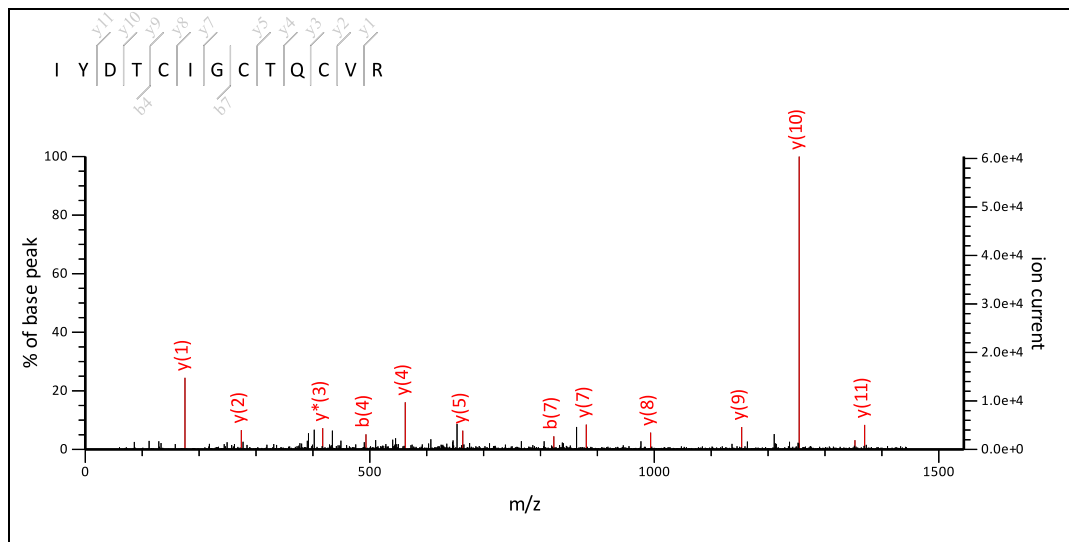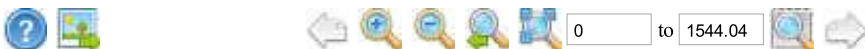

Label all possible matches  Label matches used for scoring

Monoisotopic mass of neutral peptide Mr(calc): 1644.7059

Fixed modifications: Carbamidomethyl (C) (apply to specified residues or termini only)

Ions Score: 103 Expect: 1.5e-06

Matches : 15/207 fragment ions using 14 most intense peaks [\(help\)](#)

| #  | Immon.   | a         | a*        | a <sup>0</sup> | b         | b*        | b <sup>0</sup> | d         | d'        | Seq. | v         | w         | w'        | y         | y*        |
|----|----------|-----------|-----------|----------------|-----------|-----------|----------------|-----------|-----------|------|-----------|-----------|-----------|-----------|-----------|
| 1  | 86.0964  | 86.0964   |           |                | 114.0913  |           |                | 44.0495   |           | I    |           |           |           |           |           |
| 2  | 136.0757 | 249.1598  |           |                | 277.1547  |           |                |           |           | Y    | 1424.5715 |           |           | 1532.6290 | 1515.6025 |
| 3  | 88.0393  | 364.1867  |           | 346.1761       | 392.1816  |           | 374.1710       | 320.1969  |           | D    | 1309.5446 | 1308.5493 |           | 1369.5657 | 1352.5392 |
| 4  | 74.0600  | 465.2344  |           | 447.2238       | 493.2293  |           | 475.2187       | 449.2395  | 451.2187  | T    | 1208.4969 | 1221.5173 | 1223.4966 | 1254.5388 | 1237.5122 |
| 5  | 133.0430 | 625.2650  |           | 607.2545       | 653.2599  |           | 635.2494       | 536.2715  |           | C    | 1048.4663 | 1047.4710 |           | 1153.4911 | 1136.4645 |
| 6  | 86.0964  | 738.3491  |           | 720.3385       | 766.3440  |           | 748.3334       | 710.3178  | 724.3334  | I    | 935.3822  | 948.4026  | 962.4183  | 993.4604  | 976.4339  |
| 7  | 30.0338  | 795.3706  |           | 777.3600       | 823.3655  |           | 805.3549       |           |           | G    |           |           |           | 880.3764  | 863.3498  |
| 8  | 133.0430 | 955.4012  |           | 937.3906       | 983.3961  |           | 965.3856       | 866.4077  |           | C    | 718.3301  | 717.3348  |           | 823.3549  | 806.3284  |
| 9  | 74.0600  | 1056.4489 |           | 1038.4383      | 1084.4438 |           | 1066.4332      | 1040.4540 | 1042.4332 | T    | 617.2824  | 630.3028  | 632.2821  | 663.3243  | 646.2977  |
| 10 | 101.0709 | 1184.5075 | 1167.4809 | 1166.4969      | 1212.5024 | 1195.4758 | 1194.4918      | 1127.4860 |           | Q    | 489.2238  | 488.2286  |           | 562.2766  | 545.2500  |
| 11 | 133.0430 | 1344.5381 | 1327.5116 | 1326.5275      | 1372.5330 | 1355.5065 | 1354.5225      | 1255.5446 |           | C    | 329.1932  | 328.1979  |           | 434.2180  | 417.1915  |
| 12 | 72.0808  | 1443.6065 | 1426.5800 | 1425.5960      | 1471.6014 | 1454.5749 | 1453.5909      | 1429.5909 |           | V    | 230.1248  | 243.1452  |           | 274.1874  | 257.1608  |
| 13 | 129.1135 |           |           |                |           |           |                |           |           | R    | 74.0237   | 73.0284   |           | 175.1190  | 158.0924  |

| Seq    | ya       | yb       | Seq    | ya       | yb       | Seq    | ya       | yb       |
|--------|----------|----------|--------|----------|----------|--------|----------|----------|
| YD     | 251.1026 | 279.0975 | YDT    | 352.1503 | 380.1452 | YDTC   | 512.1810 | 540.1759 |
| YDTCI  | 625.2650 | 653.2599 | YDTCIG | 682.2865 | 710.2814 | DT     | 189.0870 | 217.0819 |
| DTC    | 349.1176 | 377.1125 | DTCI   | 462.2017 | 490.1966 | DTCIG  | 519.2232 | 547.2181 |
| DTCIGC | 679.2538 | 707.2487 | TC     | 234.0907 | 262.0856 | TCI    | 347.1748 | 375.1697 |
| TCIG   | 404.1962 | 432.1911 | TCIGC  | 564.2269 | 592.2218 | TCIGCT | 665.2745 | 693.2695 |
| CI     | 246.1271 | 274.1220 | CIG    | 303.1485 | 331.1435 | CIGC   | 463.1792 | 491.1741 |
| CIGCT  | 564.2269 | 592.2218 | CIGCTQ | 692.2854 | 720.2804 | IG     | 143.1179 | 171.1128 |
| IGC    | 303.1485 | 331.1435 | IGCT   | 404.1962 | 432.1911 | IGCTQ  | 532.2548 | 560.2497 |

|                        |          |          |                       |          |          |                        |          |          |
|------------------------|----------|----------|-----------------------|----------|----------|------------------------|----------|----------|
| <a href="#">IGCTQC</a> | 692.2854 | 720.2804 | <a href="#">GC</a>    | 190.0645 | 218.0594 | <a href="#">GCT</a>    | 291.1122 | 319.1071 |
| <a href="#">GCTQ</a>   | 419.1707 | 447.1656 | <a href="#">GCTQC</a> | 579.2014 | 607.1963 | <a href="#">GCTQCV</a> | 678.2698 | 706.2647 |
| <a href="#">CT</a>     | 234.0907 | 262.0856 | <a href="#">CTQ</a>   | 362.1493 | 390.1442 | <a href="#">CTQC</a>   | 522.1799 | 550.1748 |
| <a href="#">CTQCV</a>  | 621.2483 | 649.2432 | <a href="#">TQ</a>    | 202.1186 | 230.1135 | <a href="#">TQC</a>    | 362.1493 | 390.1442 |
| <a href="#">TQCV</a>   | 461.2177 | 489.2126 | <a href="#">QC</a>    | 261.1016 | 289.0965 | <a href="#">QCV</a>    | 360.1700 | 388.1649 |
| <a href="#">CV</a>     | 232.1114 | 260.1063 |                       |          |          |                        |          |          |

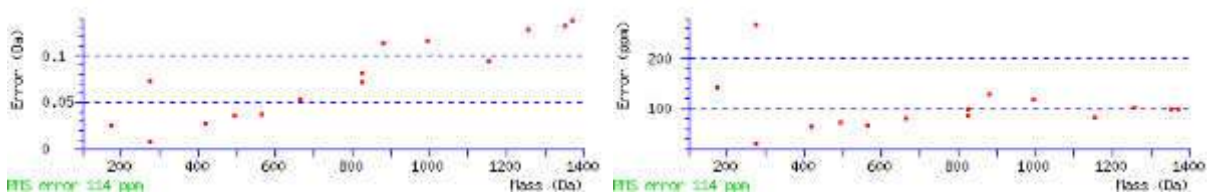

NCBI **BLAST** search of [IYDTCIGCTOCV](#)R

(Parameters: blastp, nr protein database, expect=20000, no filter, PAM30)

Other BLAST [web gateways](#)

#### All matches to this query

| Score | Mr(calc)  | Delta   | Sequence                        |
|-------|-----------|---------|---------------------------------|
| 103.3 | 1644.7059 | 0.0789  | <a href="#">IYDTCIGCTOCV</a> R  |
| 32.1  | 1644.7532 | 0.0315  | <a href="#">FEDNFINNAFTGR</a>   |
| 26.5  | 1644.6834 | 0.1013  | <a href="#">DEFTCIASCMLPV</a>   |
| 26.3  | 1644.9199 | -0.1352 | <a href="#">KLPPEGNLLYDTR</a>   |
| 25.1  | 1644.8584 | -0.0736 | <a href="#">VPPSEREGLTAAQSR</a> |
| 24.5  | 1644.7995 | -0.0148 | <a href="#">YEVTKTTODYEIR</a>   |
| 24.4  | 1644.8181 | -0.0334 | <a href="#">DTGMTFLEYVSKVR</a>  |
| 24.4  | 1644.7025 | 0.0822  | <a href="#">DDWFVCGMRSSGTK</a>  |
| 24.3  | 1644.7236 | 0.0611  | <a href="#">LYDCTLDATDMRR</a>   |
| 22.0  | 1644.7453 | 0.0394  | <a href="#">MEDFNLYKDIADR</a>   |

Mascot: <http://www.matrixscience.com/>



# Mascot Search Results

## Peptide View Spot no 147

MS/MS Fragmentation of **Y M V I Q G E P G V V I R**

Found in **gi|115466468** in **NCBI nr**, Os06g0152100 [Oryza sativa Japonica Group]

Match to Query 10: 1459.820824 from(1460.828100,1+) intensity(0.0000) index(9)

Title: Label: B9, Spot\_Id: 219803, Peak\_List\_Id: 226603, MSMS Job\_Run\_Id: 21850, Comment:

Data file C:\Documents and Settings\Administrator\Desktop\Farah-Garima 11May 2013\ppw\_B9\_136859937100.txt

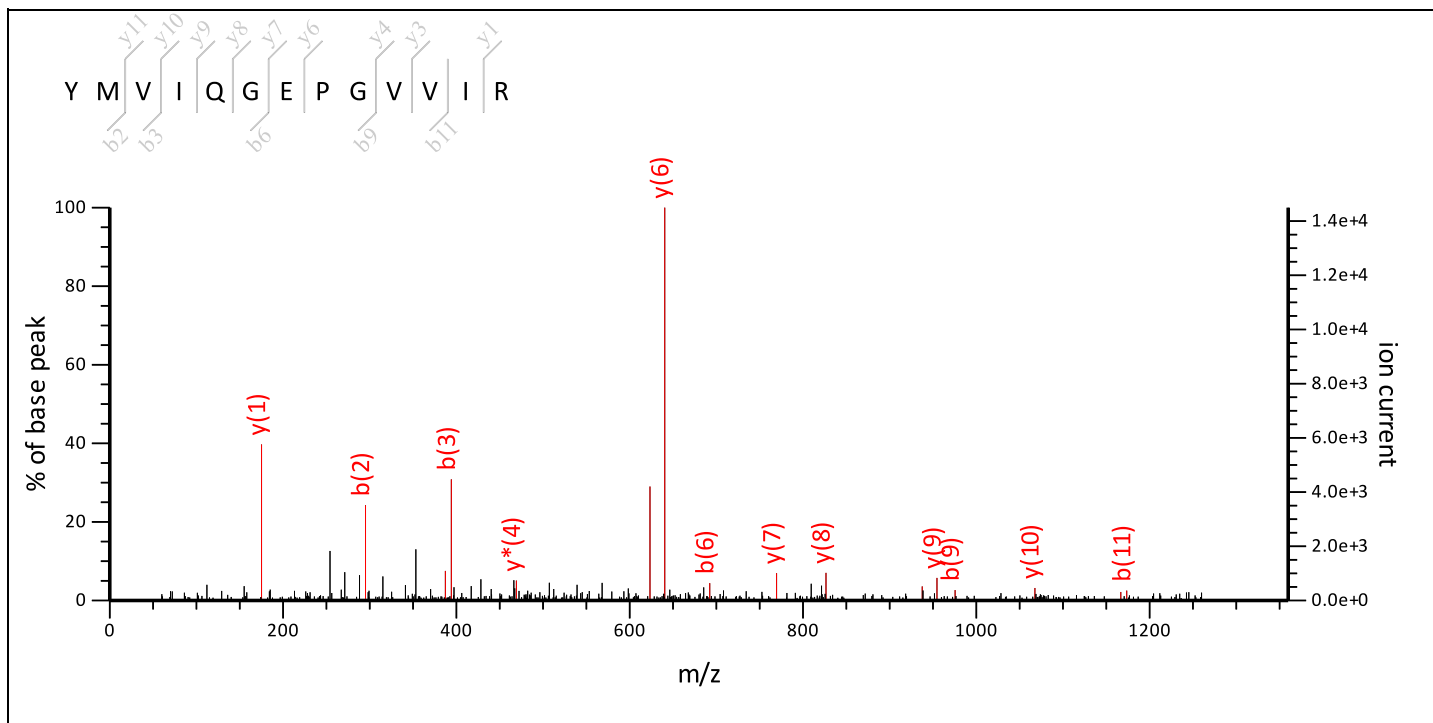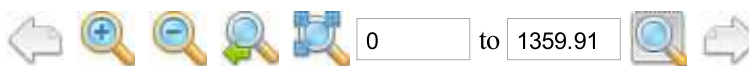

Label all possible matches  Label matches used for scoring

**Monoisotopic mass of neutral peptide Mr(calc):** 1459.7857

**Fixed modifications:** Carbamidomethyl (C) (apply to specified residues or termini only)

**Ions Score:** 58 **Expect:** 0.0026

**Matches :** 16/64 fragment ions using 24 most intense peaks ([help](#))

| # | a        | a*       | b               | b*       | Seq. | y                | y*              | #  |
|---|----------|----------|-----------------|----------|------|------------------|-----------------|----|
| 1 | 136.0757 |          | 164.0706        |          | Y    |                  |                 | 13 |
| 2 | 267.1162 |          | <b>295.1111</b> |          | M    | 1297.7297        | 1280.7031       | 12 |
| 3 | 366.1846 |          | <b>394.1795</b> |          | V    | <b>1166.6892</b> | 1149.6626       | 11 |
| 4 | 479.2687 |          | 507.2636        |          | I    | <b>1067.6208</b> | 1050.5942       | 10 |
| 5 | 607.3272 | 590.3007 | 635.3221        | 618.2956 | Q    | <b>954.5367</b>  | <b>937.5102</b> | 9  |
| 6 | 664.3487 | 647.3221 | <b>692.3436</b> | 675.3171 | G    | <b>826.4781</b>  | 809.4516        | 8  |
| 7 | 793.3913 | 776.3647 | 821.3862        | 804.3597 | E    | <b>769.4567</b>  | 752.4301        | 7  |
| 8 | 890.4441 | 873.4175 | 918.4390        | 901.4124 | P    | <b>640.4141</b>  | <b>623.3875</b> | 6  |

|    |           |           |                  |           |          |                 |                 |          |
|----|-----------|-----------|------------------|-----------|----------|-----------------|-----------------|----------|
| 9  | 947.4655  | 930.4390  | <b>975.4604</b>  | 958.4339  | <b>G</b> | 543.3613        | 526.3348        | <b>5</b> |
| 10 | 1046.5339 | 1029.5074 | 1074.5288        | 1057.5023 | <b>V</b> | 486.3398        | <b>469.3133</b> | <b>4</b> |
| 11 | 1145.6023 | 1128.5758 | <b>1173.5973</b> | 1156.5707 | <b>V</b> | <b>387.2714</b> | 370.2449        | <b>3</b> |
| 12 | 1258.6864 | 1241.6599 | 1286.6813        | 1269.6548 | <b>I</b> | 288.2030        | 271.1765        | <b>2</b> |
| 13 |           |           |                  |           | <b>R</b> | <b>175.1190</b> | 158.0924        | <b>1</b> |

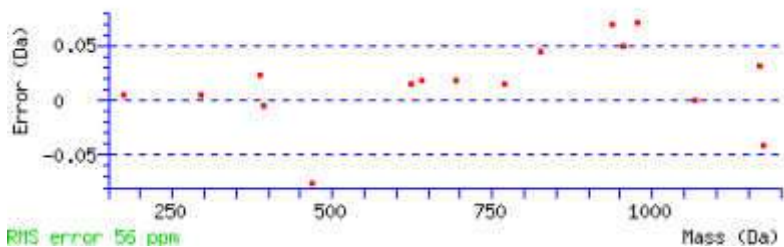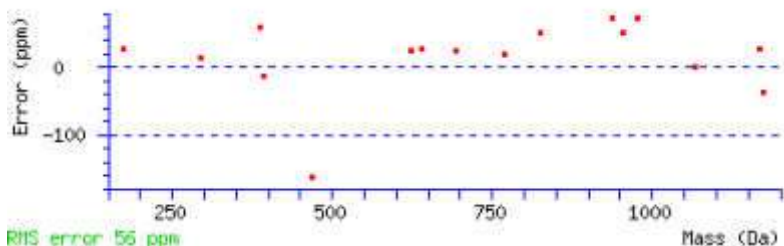

NCBI **BLAST** search of [YMVIQGEPGVVIR](#)

(Parameters: blastp, nr protein database, expect=20000, no filter, PAM30)

Other BLAST [web gateways](#)

#### All matches to this query

| Score | Mr(calc)  | Delta   | Sequence                       |
|-------|-----------|---------|--------------------------------|
| 58.5  | 1459.7857 | 0.0351  | <a href="#">YMVIQGEPGVVIR</a>  |
| 36.3  | 1459.7857 | 0.0351  | <a href="#">YMLVQGDPIGIVIR</a> |
| 20.7  | 1459.7969 | 0.0239  | <a href="#">YMVIRGEPGAVIR</a>  |
| 12.8  | 1459.7307 | 0.0901  | <a href="#">LSSFVSISSSSFGR</a> |
| 11.2  | 1459.6991 | 0.1218  | <a href="#">TSVPRVWAGGDCR</a>  |
| 9.0   | 1459.7341 | 0.0868  | <a href="#">VVEAAVAEQGLCSK</a> |
| 8.8   | 1459.7130 | 0.1079  | <a href="#">DVDVGWPGIMSIR</a>  |
| 7.2   | 1459.7055 | 0.1153  | <a href="#">SPSPPPEEQISHR</a>  |
| 6.6   | 1459.8618 | -0.0410 | <a href="#">MVMKCLKPSILIR</a>  |
| 6.6   | 1459.7897 | 0.0311  | <a href="#">VMYLFVEYKLR</a>    |

Mascot: <http://www.matrixscience.com/>



# Mascot Search Results

## Peptide View Spot no 147

MS/MS Fragmentation of **DFDEPGSLAPTGLFLGGTK**

Found in **gi|115466468** in **NCBIInr**, Os06g0152100 [Oryza sativa Japonica Group]

Match to Query 17: 1920.978924 from(1921.986200,1+) intensity(0.0000) index(12)

Title: Label: B9, Spot\_Id: 219803, Peak\_List\_Id: 226607, MSMS Job\_Run\_Id: 21850, Comment:

Data file C:\Documents and Settings\Administrator\Desktop\Farah-Garima 11May 2013\ppw\_B9\_136859937100.txt

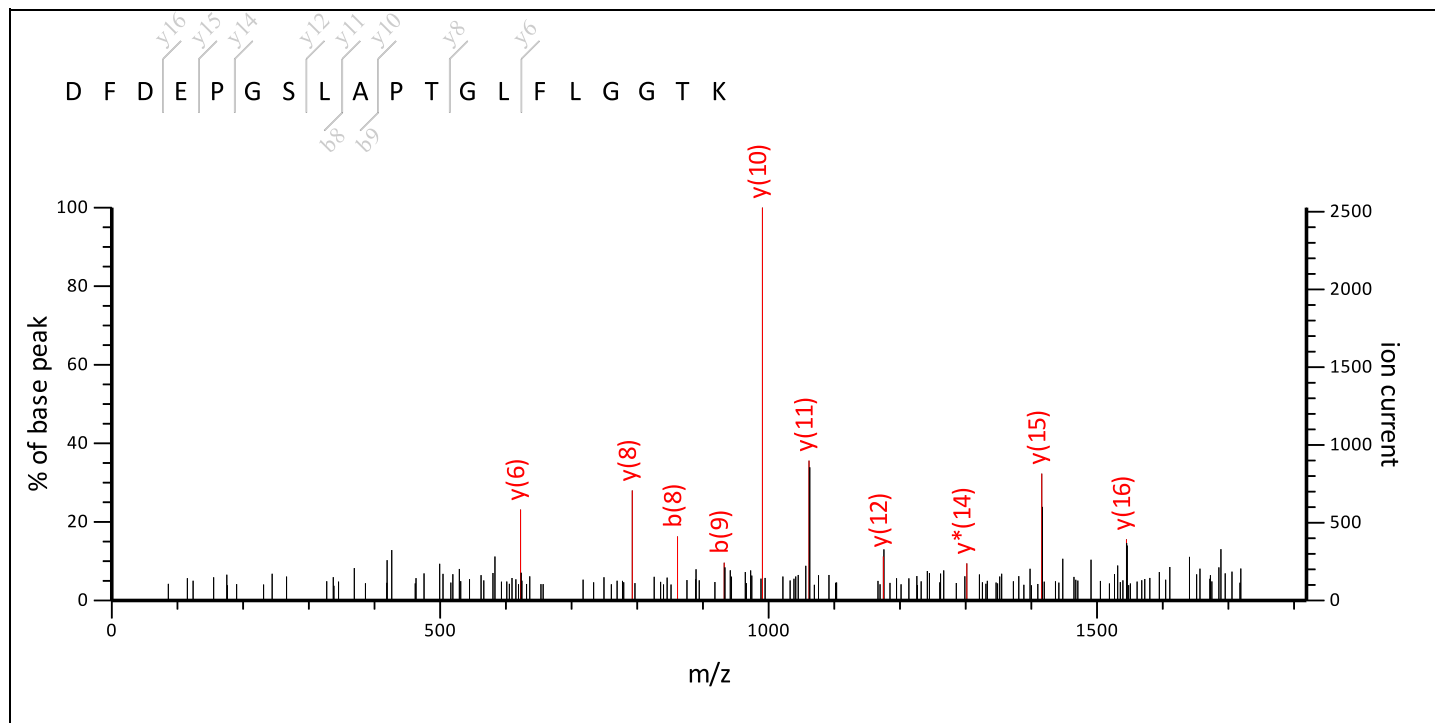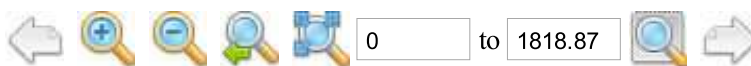

Label all possible matches  Label matches used for scoring

**Monoisotopic mass of neutral peptide Mr(calc):** 1920.9469

**Fixed modifications:** Carbamidomethyl (C) (apply to specified residues or termini only)

**Ions Score:** 18 **Expect:** 24

**Matches :** 10/72 fragment ions using 34 most intense peaks ([help](#))

| # | a        | b               | Seq. | y                | y*               | #  |
|---|----------|-----------------|------|------------------|------------------|----|
| 1 | 88.0393  | 116.0342        | D    |                  |                  | 19 |
| 2 | 235.1077 | 263.1026        | F    | 1806.9272        | 1789.9007        | 18 |
| 3 | 350.1347 | 378.1296        | D    | 1659.8588        | 1642.8323        | 17 |
| 4 | 479.1773 | 507.1722        | E    | <b>1544.8319</b> | 1527.8053        | 16 |
| 5 | 576.2300 | 604.2249        | P    | <b>1415.7893</b> | 1398.7627        | 15 |
| 6 | 633.2515 | 661.2464        | G    | 1318.7365        | <b>1301.7100</b> | 14 |
| 7 | 720.2835 | 748.2784        | S    | 1261.7151        | 1244.6885        | 13 |
| 8 | 833.3676 | <b>861.3625</b> | L    | <b>1174.6830</b> | 1157.6565        | 12 |

|    |           |           |   |           |           |    |
|----|-----------|-----------|---|-----------|-----------|----|
| 9  | 904.4047  | 932.3996  | A | 1061.5990 | 1044.5724 | 11 |
| 10 | 1001.4575 | 1029.4524 | P | 990.5619  | 973.5353  | 10 |
| 11 | 1102.5051 | 1130.5000 | T | 893.5091  | 876.4825  | 9  |
| 12 | 1159.5266 | 1187.5215 | G | 792.4614  | 775.4349  | 8  |
| 13 | 1272.6107 | 1300.6056 | L | 735.4400  | 718.4134  | 7  |
| 14 | 1419.6791 | 1447.6740 | F | 622.3559  | 605.3293  | 6  |
| 15 | 1532.7631 | 1560.7581 | L | 475.2875  | 458.2609  | 5  |
| 16 | 1589.7846 | 1617.7795 | G | 362.2034  | 345.1769  | 4  |
| 17 | 1646.8061 | 1674.8010 | G | 305.1819  | 288.1554  | 3  |
| 18 | 1747.8537 | 1775.8487 | T | 248.1605  | 231.1339  | 2  |
| 19 |           |           | K | 147.1128  | 130.0863  | 1  |

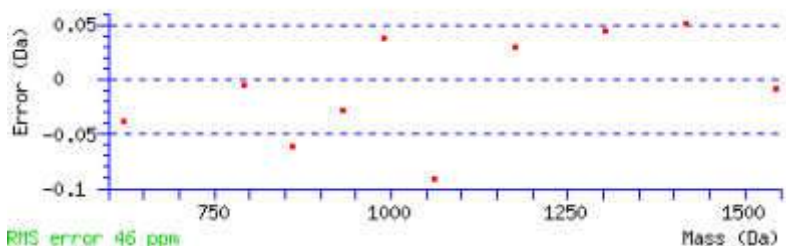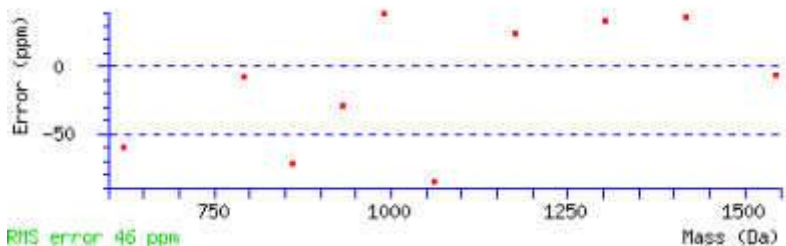

NCBI **BLAST** search of [DFDEPGSLAPTGLFLGGTK](#)

(Parameters: blastp, nr protein database, expect=20000, no filter, PAM30)

Other BLAST [web gateways](#)

#### All matches to this query

| Score | Mr(calc)  | Delta   | Sequence                              |
|-------|-----------|---------|---------------------------------------|
| 18.2  | 1920.9469 | 0.0320  | <a href="#">DFDEPGSLAPTGLFLGGTK</a>   |
| 7.4   | 1920.9792 | -0.0003 | <a href="#">ETFEELKIGSDGSLLR</a>      |
| 5.8   | 1920.8822 | 0.0967  | <a href="#">MGPNGQFIAGTAMTAPADR</a>   |
| 3.9   | 1920.8861 | 0.0928  | <a href="#">MNGGGGQRGTYGSGPPSGLR</a>  |
| 1.5   | 1921.0673 | -0.0883 | <a href="#">SSIFDAKAGIALNLNFIK</a>    |
| 1.3   | 1920.9945 | -0.0156 | <a href="#">YLTVAEAEIWNKTIDR</a>      |
| 1.1   | 1920.8735 | 0.1055  | <a href="#">GSVEENTSEGANMGLDK</a>     |
| 1.0   | 1920.8935 | 0.0855  | <a href="#">CLTGSGMPGAGNPAGAGPPPR</a> |
| 0.8   | 1920.8822 | 0.0967  | <a href="#">WICGLCAEAIKDENS</a>       |
| 0.7   | 1920.9945 | -0.0156 | <a href="#">TIDANQAF AEIGNFLIGK</a>   |

Mascot: <http://www.matrixscience.com/>




**Mascot Search Results**
**Peptide View**    **Spot no 148**
**MS/MS Fragmentation of EHISAYGEGNER**

 Found in [gi|146741370](#) in **NCBI**nr, glutamine synthetase [Avicennia marina]

Match to Query 42: 1360.585724 from(1361.593000,1+) intensity(0.0000) index(14)

Title: Label: F3, Spot\_Id: 219711, Peak\_List\_Id: 225288, MSMS Job\_Run\_Id: 21772, Comment:

Data file C:\Documents and Settings\Administrator\Desktop\farah BHU\spot set plate\Farah-Garima 11May 2013\ppw\_F3\_136842142900.txt

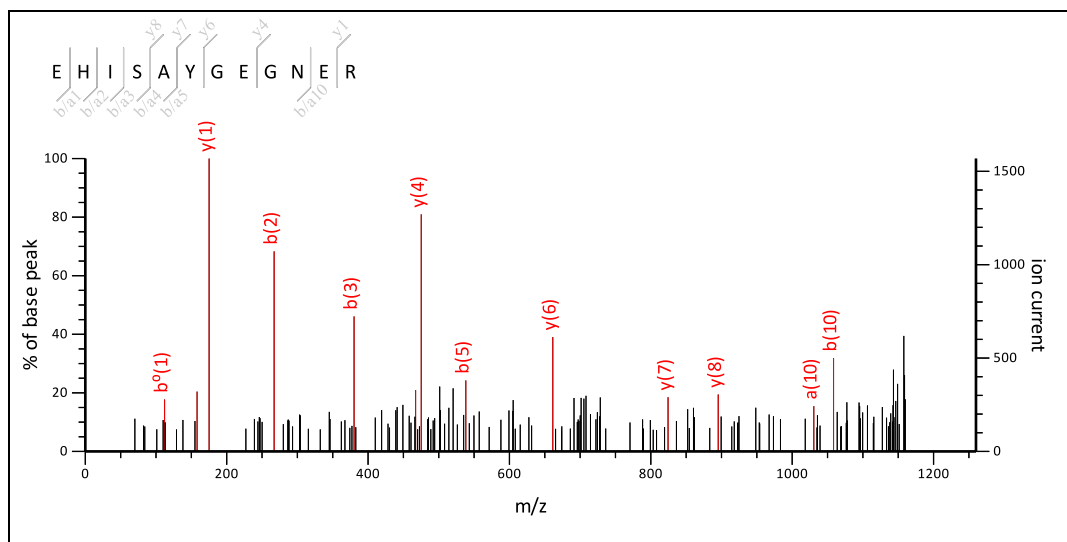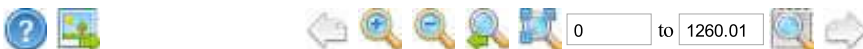
 Label all possible matches     Label matches used for scoring 
**Monoisotopic mass of neutral peptide Mr(calc):** 1360.6007

**Fixed modifications:** Carbamidomethyl (C) (apply to specified residues or termini only)

**Ions Score:** 34    **Expect:** 0.61

**Matches:** 13/190 fragment ions using 22 most intense peaks ([help](#))

| #  | Immon.   | a         | a*        | a <sup>0</sup> | b         | b*        | b <sup>0</sup> | d         | d'       | Seq. | v         | w         | w'        | y         | y*        |
|----|----------|-----------|-----------|----------------|-----------|-----------|----------------|-----------|----------|------|-----------|-----------|-----------|-----------|-----------|
| 1  | 102.0550 | 102.0550  |           | 84.0444        | 130.0499  |           | 112.0393       | 44.0495   |          | E    |           |           |           |           |           |
| 2  | 110.0713 | 239.1139  |           | 221.1033       | 267.1088  |           | 249.0982       |           |          | H    | 1150.5123 |           |           | 1232.5654 | 1215.5389 |
| 3  | 86.0964  | 352.1979  |           | 334.1874       | 380.1928  |           | 362.1823       | 324.1666  | 338.1823 | I    | 1037.4283 | 1050.4487 | 1064.4643 | 1095.5065 | 1078.4800 |
| 4  | 60.0444  | 439.2300  |           | 421.2194       | 467.2249  |           | 449.2143       | 423.2350  |          | S    | 950.3963  | 949.4010  |           | 982.4225  | 965.3959  |
| 5  | 44.0495  | 510.2671  |           | 492.2565       | 538.2620  |           | 520.2514       |           |          | A    | 879.3591  |           |           | 895.3904  | 878.3639  |
| 6  | 136.0757 | 673.3304  |           | 655.3198       | 701.3253  |           | 683.3148       |           |          | Y    | 716.2958  |           |           | 824.3533  | 807.3268  |
| 7  | 30.0338  | 730.3519  |           | 712.3413       | 758.3468  |           | 740.3362       |           |          | G    |           |           |           | 661.2900  | 644.2634  |
| 8  | 102.0550 | 859.3945  |           | 841.3839       | 887.3894  |           | 869.3788       | 801.3890  |          | E    | 530.2318  | 529.2365  |           | 604.2685  | 587.2420  |
| 9  | 30.0338  | 916.4159  |           | 898.4054       | 944.4108  |           | 926.4003       |           |          | G    |           |           |           | 475.2259  | 458.1994  |
| 10 | 87.0553  | 1030.4588 | 1013.4323 | 1012.4483      | 1058.4538 | 1041.4272 | 1040.4432      | 987.4530  |          | N    | 359.1674  | 358.1721  |           | 418.2045  | 401.1779  |
| 11 | 102.0550 | 1159.5014 | 1142.4749 | 1141.4909      | 1187.4964 | 1170.4698 | 1169.4858      | 1101.4960 |          | E    | 230.1248  | 229.1295  |           | 304.1615  | 287.1350  |
| 12 | 129.1135 |           |           |                |           |           |                |           |          | R    | 74.0237   | 73.0284   |           | 175.1190  | 158.0924  |

| Seq    | ya       | yb       | Seq     | ya       | yb       | Seq   | ya       | yb       |
|--------|----------|----------|---------|----------|----------|-------|----------|----------|
| HI     | 223.1553 | 251.1503 | HIS     | 310.1874 | 338.1823 | HISA  | 381.2245 | 409.2194 |
| HISAY  | 544.2878 | 572.2827 | HISAYG  | 601.3093 | 629.3042 | IS    | 173.1285 | 201.1234 |
| ISA    | 244.1656 | 272.1605 | ISAY    | 407.2289 | 435.2238 | ISAYG | 464.2504 | 492.2453 |
| ISAYGE | 593.2930 | 621.2879 | ISAYGEG | 650.3144 | 678.3093 | SA    | 131.0815 | 159.0764 |
| SAY    | 294.1448 | 322.1397 | SAYG    | 351.1663 | 379.1612 | SAYGE | 480.2089 | 508.2038 |
| SAYGEG | 537.2304 | 565.2253 | SAYGEGN | 651.2733 | 679.2682 | AY    | 207.1128 | 235.1077 |
| AYG    | 264.1343 | 292.1292 | AYGE    | 393.1769 | 421.1718 | AYGEG | 450.1983 | 478.1932 |
| AYGEGN | 564.2413 | 592.2362 | AYGEGNE | 693.2838 | 721.2788 | YG    | 193.0972 | 221.0921 |
| YGE    | 322.1397 | 350.1347 | YGEG    | 379.1612 | 407.1561 | YGEGN | 493.2041 | 521.1991 |

|                        |          |          |                       |          |          |                     |          |          |
|------------------------|----------|----------|-----------------------|----------|----------|---------------------|----------|----------|
| <a href="#">YGEENE</a> | 622.2467 | 650.2416 | <a href="#">GE</a>    | 159.0764 | 187.0713 | <a href="#">GEG</a> | 216.0979 | 244.0928 |
| <a href="#">GEGN</a>   | 330.1408 | 358.1357 | <a href="#">GEGNE</a> | 459.1834 | 487.1783 | <a href="#">EG</a>  | 159.0764 | 187.0713 |
| <a href="#">EGN</a>    | 273.1193 | 301.1143 | <a href="#">EGNE</a>  | 402.1619 | 430.1569 | <a href="#">GN</a>  | 144.0768 | 172.0717 |
| <a href="#">GNE</a>    | 273.1193 | 301.1143 | <a href="#">NE</a>    | 216.0979 | 244.0928 |                     |          |          |

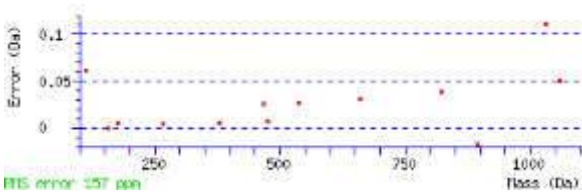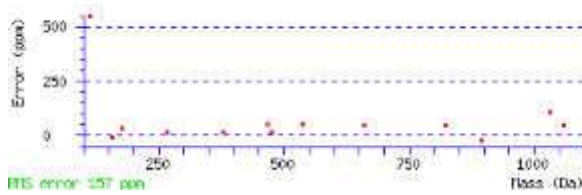

NCBI BLAST search of [EHISAYGEGNER](#)

(Parameters: blastp, nr protein database, expect=20000, no filter, PAM30)

Other BLAST [web gateways](#)

**All matches to this query**

| Score | Mr(calc)  | Delta   | Sequence                     |
|-------|-----------|---------|------------------------------|
| 34.2  | 1360.6007 | -0.0150 | <a href="#">EHISAYGEGNER</a> |
| 21.5  | 1360.6007 | -0.0150 | <a href="#">EHIASYGEGNER</a> |
| 13.1  | 1360.6524 | -0.0667 | <a href="#">RFYFSTNSSPR</a>  |
| 12.8  | 1360.5969 | -0.0112 | <a href="#">AYMLDVDAYER</a>  |
| 12.5  | 1360.6405 | -0.0548 | <a href="#">TTSMHGDIGVAR</a> |
| 9.4   | 1360.6775 | -0.0918 | <a href="#">EHEAAIEFLR</a>   |
| 8.8   | 1360.6582 | -0.0725 | <a href="#">EKSTSOAPQTER</a> |
| 8.8   | 1360.5686 | 0.0171  | <a href="#">SMTMARECGER</a>  |
| 8.8   | 1360.5686 | 0.0171  | <a href="#">SMTMARECGER</a>  |
| 8.0   | 1360.5870 | -0.0013 | <a href="#">NMFEYSNWVR</a>   |

Mascot: <http://www.matrixscience.com/>

**MATRIX SCIENCE Mascot Search Results**

**Peptide View Spot no 148**

MS/MS Fragmentation of **HKEHISAYGEGNER**

Found in **gi|146741370** in **NCBI nr**, glutamine synthetase [Avicennia marina]

Match to Query 68: 1625.733124 from(1626.740400,1+) intensity(0.0000) index(25)

Title: Label: F3, Spot\_Id: 219711, Peak\_List\_Id: 225282, MSMS Job\_Run\_Id: 21772, Comment:

Data file C:\Documents and Settings\Administrator\Desktop\farah BHU\spot set plate\Farah-Garima 11May 2013\ppw\_F3\_136842142900.txt

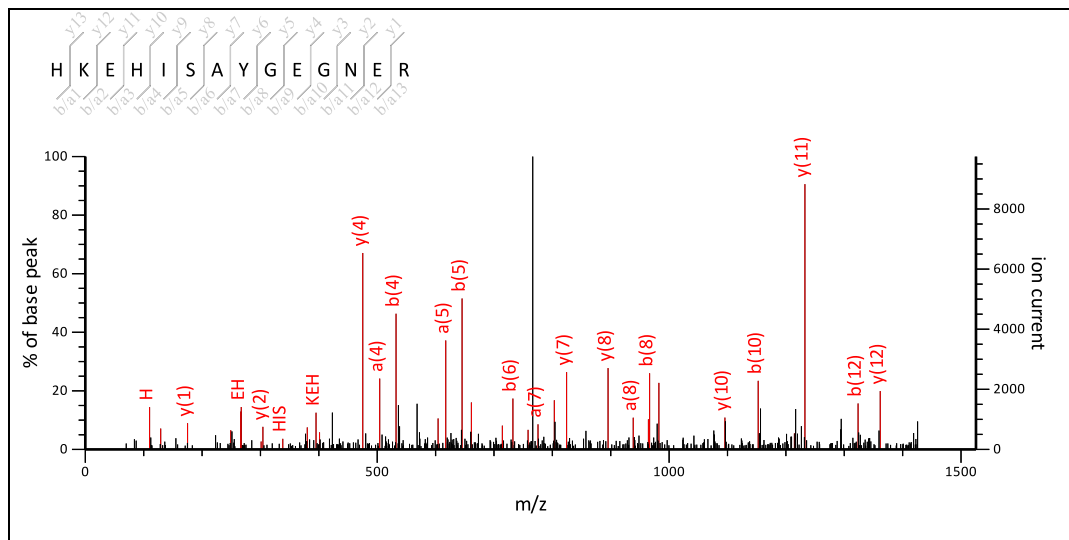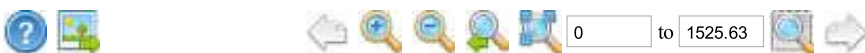

Label all possible matches  Label matches used for scoring

Monoisotopic mass of neutral peptide Mr(calc): 1625.7546

Fixed modifications: Carbamidomethyl (C) (apply to specified residues or termini only)

Ions Score: 77 Expect: 2.8e-05

Matches : 40/247 fragment ions using 56 most intense peaks [\(help\)](#)

| #  | Immon.   | a         | a*        | a <sup>0</sup> | b         | b*        | b <sup>0</sup> | d         | d'       | Seq. | v         | w         | w'        | y         | y*        |
|----|----------|-----------|-----------|----------------|-----------|-----------|----------------|-----------|----------|------|-----------|-----------|-----------|-----------|-----------|
| 1  | 110.0713 | 110.0713  |           |                | 138.0662  |           |                | 44.0495   |          | H    |           |           |           |           |           |
| 2  | 101.1073 | 238.1662  | 221.1397  |                | 266.1612  | 249.1346  |                | 181.1084  |          | K    | 1416.6138 | 1415.6186 |           | 1489.7030 | 1472.6764 |
| 3  | 102.0550 | 367.2088  | 350.1823  | 349.1983       | 395.2037  | 378.1772  | 377.1932       | 309.2034  |          | E    | 1287.5713 | 1286.5760 |           | 1361.6080 | 1344.5815 |
| 4  | 110.0713 | 504.2677  | 487.2412  | 486.2572       | 532.2627  | 515.2361  | 514.2521       |           |          | H    | 1150.5123 |           |           | 1232.5654 | 1215.5389 |
| 5  | 86.0964  | 617.3518  | 600.3253  | 599.3412       | 645.3467  | 628.3202  | 627.3362       | 589.3205  | 603.3362 | I    | 1037.4283 | 1050.4487 | 1064.4643 | 1095.5065 | 1078.4800 |
| 6  | 60.0444  | 704.3838  | 687.3573  | 686.3733       | 732.3787  | 715.3522  | 714.3682       | 688.3889  |          | S    | 950.3962  | 949.4010  |           | 982.4225  | 965.3959  |
| 7  | 44.0495  | 775.4209  | 758.3944  | 757.4104       | 803.4159  | 786.3893  | 785.4053       |           |          | A    | 879.3591  |           |           | 895.3904  | 878.3639  |
| 8  | 136.0757 | 938.4843  | 921.4577  | 920.4737       | 966.4792  | 949.4526  | 948.4686       |           |          | Y    | 716.2958  |           |           | 824.3533  | 807.3268  |
| 9  | 30.0338  | 995.5057  | 978.4792  | 977.4952       | 1023.5007 | 1006.4741 | 1005.4901      |           |          | G    |           |           |           | 661.2900  | 644.2634  |
| 10 | 102.0550 | 1124.5483 | 1107.5218 | 1106.5378      | 1152.5432 | 1135.5167 | 1134.5327      | 1066.5429 |          | E    | 530.2317  | 529.2365  |           | 604.2685  | 587.2420  |
| 11 | 30.0338  | 1181.5698 | 1164.5432 | 1163.5592      | 1209.5647 | 1192.5382 | 1191.5541      |           |          | G    |           |           |           | 475.2259  | 458.1994  |
| 12 | 87.0553  | 1295.6127 | 1278.5862 | 1277.6022      | 1323.6076 | 1306.5811 | 1305.5971      | 1252.6069 |          | N    | 359.1674  | 358.1721  |           | 418.2045  | 401.1779  |
| 13 | 102.0550 | 1424.6553 | 1407.6288 | 1406.6448      | 1452.6502 | 1435.6237 | 1434.6397      | 1366.6498 |          | E    | 230.1248  | 229.1295  |           | 304.1615  | 287.1350  |
| 14 | 129.1135 |           |           |                |           |           |                |           |          | R    | 74.0237   | 73.0284   |           | 175.1190  | 158.0924  |

| Seq    | ya       | yb       | Seq    | ya       | yb       | Seq     | ya       | yb       |
|--------|----------|----------|--------|----------|----------|---------|----------|----------|
| KE     | 230.1499 | 258.1448 | KEH    | 367.2088 | 395.2037 | KEHI    | 480.2929 | 508.2878 |
| KEHIS  | 567.3249 | 595.3198 | KEHISA | 638.3620 | 666.3569 | EH      | 239.1139 | 267.1088 |
| EHI    | 352.1979 | 380.1928 | EHIS   | 439.2300 | 467.2249 | EHISA   | 510.2671 | 538.2620 |
| EHISAY | 673.3304 | 701.3253 | HI     | 223.1553 | 251.1503 | HIS     | 310.1874 | 338.1823 |
| HISA   | 381.2245 | 409.2194 | HISAY  | 544.2878 | 572.2827 | HISAYG  | 601.3093 | 629.3042 |
| IS     | 173.1285 | 201.1234 | ISA    | 244.1656 | 272.1605 | ISAY    | 407.2289 | 435.2238 |
| ISAYG  | 464.2504 | 492.2453 | ISAYGE | 593.2930 | 621.2879 | ISAYGEG | 650.3144 | 678.3093 |

|       |          |          |        |          |          |         |          |          |
|-------|----------|----------|--------|----------|----------|---------|----------|----------|
| SA    | 131.0815 | 159.0764 | SAY    | 294.1448 | 322.1397 | SAYG    | 351.1663 | 379.1612 |
| SAYGE | 480.2089 | 508.2038 | SAYGEG | 537.2304 | 565.2253 | SAYGEGN | 651.2733 | 679.2682 |
| AY    | 207.1128 | 235.1077 | AYG    | 264.1343 | 292.1292 | AYGE    | 393.1769 | 421.1718 |
| AYGEG | 450.1983 | 478.1932 | AYGEGN | 564.2413 | 592.2362 | AYGEGNE | 693.2838 | 721.2788 |
| YG    | 193.0972 | 221.0921 | YGE    | 322.1397 | 350.1347 | YGEG    | 379.1612 | 407.1561 |
| YGEGN | 493.2041 | 521.1991 | YGEGNE | 622.2467 | 650.2416 | GE      | 159.0764 | 187.0713 |
| GEG   | 216.0979 | 244.0928 | GEGN   | 330.1408 | 358.1357 | GEGNE   | 459.1834 | 487.1783 |
| EG    | 159.0764 | 187.0713 | EGN    | 273.1193 | 301.1143 | EGNE    | 402.1619 | 430.1569 |
| GN    | 144.0768 | 172.0717 | GNE    | 273.1193 | 301.1143 | NE      | 216.0979 | 244.0928 |

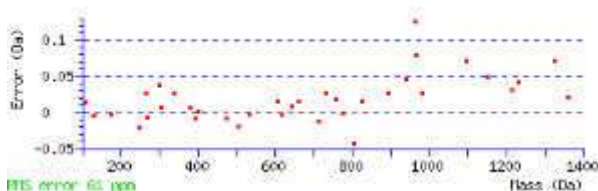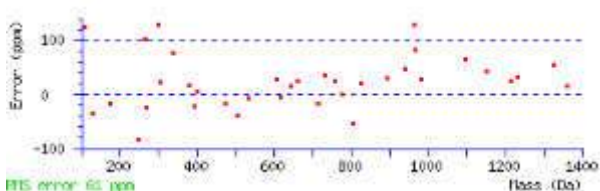

NCBI BLAST search of [HKEHISAYGEGNER](#)

(Parameters: blastp, nr protein database, expect=20000, no filter, PAM30)

Other BLAST [web gateways](#)

#### All matches to this query

| Score | Mr(calc)  | Delta   | Sequence                         |
|-------|-----------|---------|----------------------------------|
| 77.4  | 1625.7546 | -0.0215 | <a href="#">HKEHISAYGEGNER</a>   |
| 61.9  | 1625.7546 | -0.0215 | <a href="#">HKEHIASYGEGNER</a>   |
| 22.3  | 1625.7937 | -0.0606 | <a href="#">FDIVIGSELAYDER</a>   |
| 19.0  | 1625.7579 | -0.0248 | <a href="#">RHEAMQAAAAAGADEK</a> |
| 16.3  | 1625.8162 | -0.0830 | <a href="#">QGHGVWTEAESVAKK</a>  |
| 14.4  | 1625.8460 | -0.1129 | <a href="#">HASVATWAAAKMQVR</a>  |
| 13.0  | 1625.7250 | 0.0081  | <a href="#">SGGRSTVSAMAVDGCR</a> |
| 11.9  | 1625.7005 | 0.0327  | <a href="#">GRAEADNFM SHGYR</a>  |
| 10.0  | 1625.7579 | -0.0248 | <a href="#">MSPEALEHAARNER</a>   |
| 9.3   | 1625.7607 | -0.0276 | <a href="#">SDFDMLLSIQNDK</a>    |

Mascot: <http://www.matrixscience.com/>

**MATRIX SCIENCE Mascot Search Results**

**Peptide View Spot no 148**

MS/MS Fragmentation of **HETANIDTFSWGVANR**

Found in **gi|146741370** in **NCBI nr**, glutamine synthetase [Avicennia marina]

Match to Query 81: 1816.824524 from(1817.831800,1+) intensity(0.0000) index(30)

Title: Label: F3, Spot\_Id: 219711, Peak\_List\_Id: 225286, MSMS Job\_Run\_Id: 21772, Comment:

Data file C:\Documents and Settings\Administrator\Desktop\farah BHU\spot set plate\Farah-Garima 11May 2013\ppw\_F3\_136842142900.txt

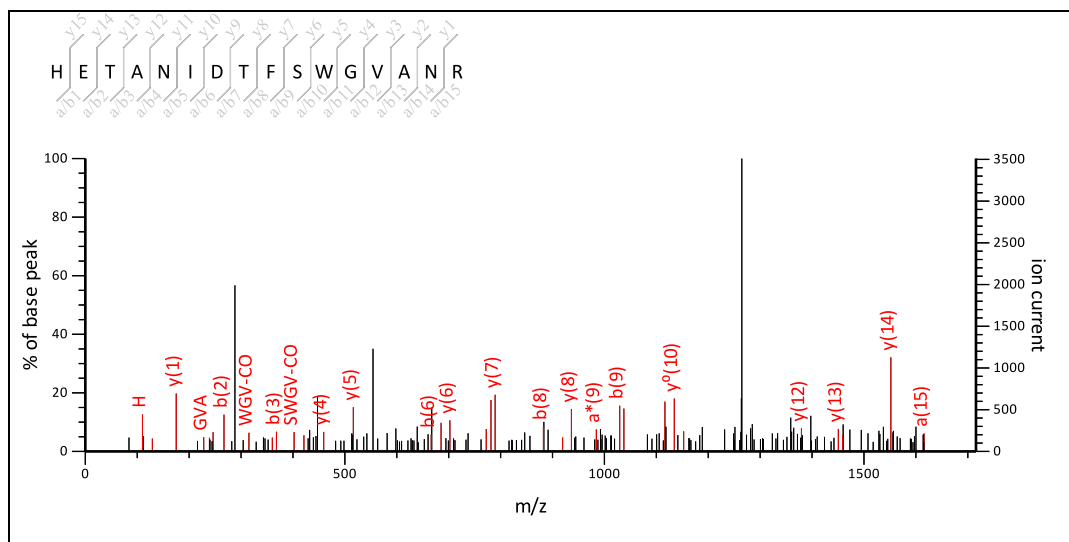

Navigation icons: Home, Back, Forward, Search, Print, Refresh. Range: 0 to 1715.77

Label all possible matches  Label matches used for scoring

Monoisotopic mass of neutral peptide Mr(calc): 1816.8493

Fixed modifications: Carbamidomethyl (C) (apply to specified residues or termini only)

Ions Score: 57 Expect: 0.0029

Matches : 43/283 fragment ions using 80 most intense peaks (help)

| #  | Immon.   | a         | a*        | a <sup>0</sup> | b         | b*        | b <sup>0</sup> | d         | d'       | Seq. | v         | w         | w'        | y         | y*        |
|----|----------|-----------|-----------|----------------|-----------|-----------|----------------|-----------|----------|------|-----------|-----------|-----------|-----------|-----------|
| 1  | 110.0713 | 110.0713  |           |                | 138.0662  |           |                | 44.0495   |          | H    |           |           |           |           |           |
| 2  | 102.0550 | 239.1139  |           | 221.1033       | 267.1088  |           | 249.0982       | 181.1084  |          | E    | 1606.7608 | 1605.7656 |           | 1680.7976 | 1663.7711 |
| 3  | 74.0600  | 340.1615  |           | 322.1510       | 368.1565  |           | 350.1459       | 324.1666  | 326.1459 | T    | 1505.7132 | 1518.7336 | 1520.7128 | 1551.7550 | 1534.7285 |
| 4  | 44.0495  | 411.1987  |           | 393.1881       | 439.1936  |           | 421.1830       |           |          | A    | 1434.6761 |           |           | 1450.7074 | 1433.6808 |
| 5  | 87.0553  | 525.2416  | 508.2150  | 507.2310       | 553.2365  | 536.2100  | 535.2259       | 482.2358  |          | N    | 1320.6331 | 1319.6379 |           | 1379.6702 | 1362.6437 |
| 6  | 86.0964  | 638.3256  | 621.2991  | 620.3151       | 666.3206  | 649.2940  | 648.3100       | 610.2943  | 624.3100 | I    | 1207.5491 | 1220.5695 | 1234.5851 | 1265.6273 | 1248.6008 |
| 7  | 88.0393  | 753.3526  | 736.3260  | 735.3420       | 781.3475  | 764.3210  | 763.3369       | 709.3628  |          | D    | 1092.5221 | 1091.5269 |           | 1152.5432 | 1135.5167 |
| 8  | 74.0600  | 854.4003  | 837.3737  | 836.3897       | 882.3952  | 865.3686  | 864.3846       | 838.4054  | 840.3846 | T    | 991.4744  | 1004.4948 | 1006.4741 | 1037.5163 | 1020.4898 |
| 9  | 120.0808 | 1001.4687 | 984.4421  | 983.4581       | 1029.4636 | 1012.4371 | 1011.4530      |           |          | F    | 844.4060  |           |           | 936.4686  | 919.4421  |
| 10 | 60.0444  | 1088.5007 | 1071.4742 | 1070.4901      | 1116.4956 | 1099.4691 | 1098.4851      | 1072.5058 |          | S    | 757.3740  | 756.3787  |           | 789.4002  | 772.3737  |
| 11 | 159.0917 | 1274.5800 | 1257.5535 | 1256.5695      | 1302.5749 | 1285.5484 | 1284.5644      |           |          | W    | 571.2947  |           |           | 702.3682  | 685.3416  |
| 12 | 30.0338  | 1331.6015 | 1314.5749 | 1313.5909      | 1359.5964 | 1342.5699 | 1341.5858      |           |          | G    |           |           |           | 516.2889  | 499.2623  |
| 13 | 72.0808  | 1430.6699 | 1413.6434 | 1412.6593      | 1458.6648 | 1441.6383 | 1440.6543      | 1416.6543 |          | V    | 415.2048  | 428.2252  |           | 459.2674  | 442.2409  |
| 14 | 44.0495  | 1501.7070 | 1484.6805 | 1483.6965      | 1529.7019 | 1512.6754 | 1511.6914      |           |          | A    | 344.1677  |           |           | 360.1990  | 343.1724  |
| 15 | 87.0553  | 1615.7499 | 1598.7234 | 1597.7394      | 1643.7449 | 1626.7183 | 1625.7343      | 1572.7441 |          | N    | 230.1248  | 229.1295  |           | 289.1619  | 272.1353  |
| 16 | 129.1135 |           |           |                |           |           |                |           |          | R    | 74.0237   | 73.0284   |           | 175.1190  | 158.0924  |

| Seq    | ya       | yb       | Seq    | ya       | yb       | Seq    | ya       | yb       |
|--------|----------|----------|--------|----------|----------|--------|----------|----------|
| ET     | 203.1026 | 231.0975 | ETA    | 274.1397 | 302.1347 | ETAN   | 388.1827 | 416.1776 |
| ETANI  | 501.2667 | 529.2617 | ETANID | 616.2937 | 644.2886 | TA     | 145.0972 | 173.0921 |
| TAN    | 259.1401 | 287.1350 | TANI   | 372.2241 | 400.2191 | TANID  | 487.2511 | 515.2460 |
| TANIDT | 588.2988 | 616.2937 | AN     | 158.0924 | 186.0873 | ANI    | 271.1765 | 299.1714 |
| ANID   | 386.2034 | 414.1983 | ANIDT  | 487.2511 | 515.2460 | ANIDTF | 634.3195 | 662.3144 |

|        |          |          |        |          |          |        |          |          |
|--------|----------|----------|--------|----------|----------|--------|----------|----------|
| NI     | 200.1394 | 228.1343 | NID    | 315.1663 | 343.1612 | NIDT   | 416.2140 | 444.2089 |
| NIDTF  | 563.2824 | 591.2773 | NIDTFS | 650.3144 | 678.3093 | ID     | 201.1234 | 229.1183 |
| IDT    | 302.1710 | 330.1660 | IDTF   | 449.2395 | 477.2344 | IDTFS  | 536.2715 | 564.2664 |
| DT     | 189.0870 | 217.0819 | DTF    | 336.1554 | 364.1503 | DTFS   | 423.1874 | 451.1823 |
| DTFSW  | 609.2667 | 637.2617 | DTFSWG | 666.2882 | 694.2831 | TF     | 221.1285 | 249.1234 |
| TFS    | 308.1605 | 336.1554 | TFSW   | 494.2398 | 522.2347 | TFSWG  | 551.2613 | 579.2562 |
| TFSWGV | 650.3297 | 678.3246 | FS     | 207.1128 | 235.1077 | FSW    | 393.1921 | 421.1870 |
| FSWG   | 450.2136 | 478.2085 | FSWGV  | 549.2820 | 577.2769 | FSWGVA | 620.3191 | 648.3140 |
| SW     | 246.1237 | 274.1186 | SWG    | 303.1452 | 331.1401 | SWGVA  | 402.2136 | 430.2085 |
| SWGVA  | 473.2507 | 501.2456 | SWGVA  | 587.2936 | 615.2885 | WG     | 216.1131 | 244.1081 |
| WGV    | 315.1816 | 343.1765 | WGVA   | 386.2187 | 414.2136 | WGVAN  | 500.2616 | 528.2565 |
| GV     | 129.1022 | 157.0972 | GVA    | 200.1394 | 228.1343 | GVAN   | 314.1823 | 342.1772 |
| VA     | 143.1179 | 171.1128 | VAN    | 257.1608 | 285.1557 | AN     | 158.0924 | 186.0873 |

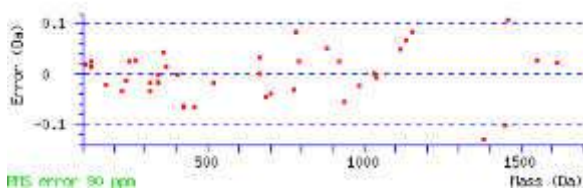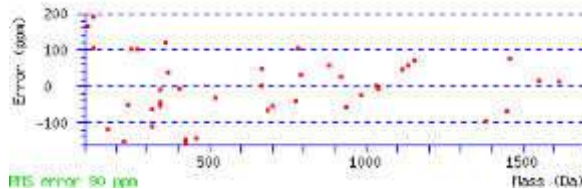

NCBI BLAST search of [HETANIDTFSWGVANR](#)

(Parameters: blastp, nr protein database, expect=20000, no filter, PAM30)

Other BLAST [web gateways](#)

#### All matches to this query

| Score | Mr(calc)  | Delta   | Sequence                          |
|-------|-----------|---------|-----------------------------------|
| 62.6  | 1816.8493 | -0.0247 | <a href="#">HETADINTFSWGVANR</a>  |
| 57.4  | 1816.8493 | -0.0247 | <a href="#">HETANIDTFSWGVANR</a>  |
| 38.3  | 1816.8856 | -0.0611 | <a href="#">HETASIDKFSWGVANR</a>  |
| 38.3  | 1816.8493 | -0.0247 | <a href="#">HETASIDQFSWGVANR</a>  |
| 15.4  | 1816.9254 | -0.1009 | <a href="#">VTSATLCASKPFHTAAR</a> |
| 11.5  | 1816.8335 | -0.0090 | <a href="#">DSMFECLESIKVTSR</a>   |
| 10.2  | 1816.9795 | -0.1550 | <a href="#">SLKKPLSSTSVGNWSAR</a> |
| 10.1  | 1816.8964 | -0.0719 | <a href="#">YTMVSAPQSIMAPHLR</a>  |
| 9.9   | 1816.9908 | -0.1662 | <a href="#">GLNLRPHQISDEGLLR</a>  |
| 9.8   | 1816.8858 | -0.0613 | <a href="#">MASSTAAPPMPRCRLR</a>  |

Mascot: <http://www.matrixscience.com/>

**MATRIX SCIENCE Mascot Search Results**

**Peptide View Spot no 151**

**MS/MS Fragmentation of QIPLSGPNSVVGR**

Found in **gi42408425** in **NCBIInr**, putative superoxide dismutase [Cu-Zn], chloroplast precursor [Oryza sativa Japonica Group]

Match to Query 26: 1322.758124 from(1323.765400,1+) intensity(0.0000) index(8)

Title: Label: M10, Spot\_Id: 219830, Peak\_List\_Id: 226964, MSMS Job\_Run\_Id: 21862, Comment:

Data file C:\Documents and Settings\Administrator\Desktop\Farah-Garima 11May 2013\ppw\_M10\_136859956100.txt

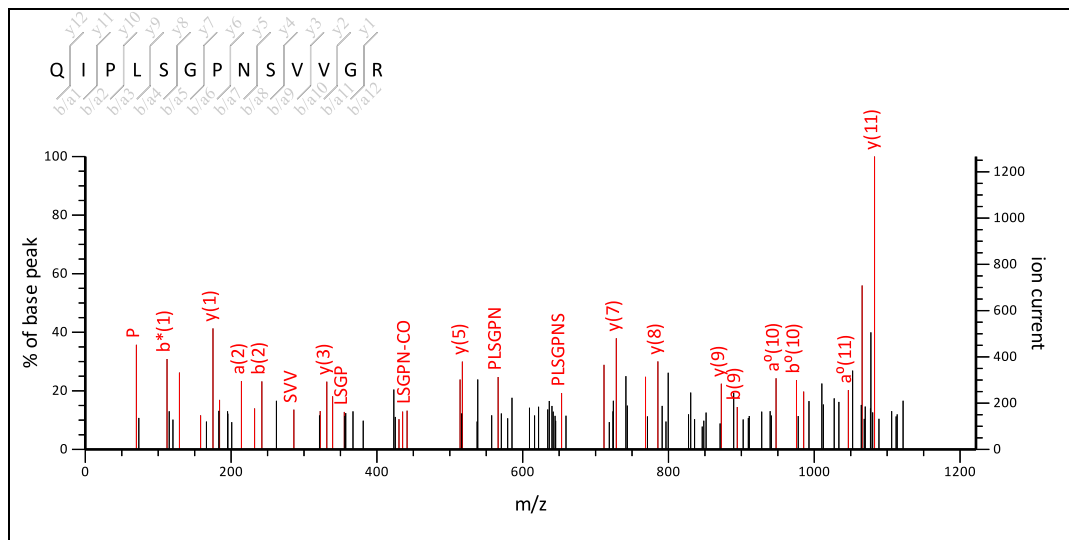

Navigation icons: Home, Back, Forward, Search, Print, Refresh. Search range: 0 to 1221.84.

Label all possible matches  Label matches used for scoring

**Monoisotopic mass of neutral peptide Mr(calc):** 1322.7307

**Fixed modifications:** Carbamidomethyl (C) (apply to specified residues or termini only)

**Ions Score:** 57 **Expect:** 0.05

**Matches:** 40/233 fragment ions using 66 most intense peaks ([help](#))

| #  | Immon.   | a         | a*        | a <sup>0</sup> | b         | b*        | b <sup>0</sup> | d         | d'       | Seq. | v         | w         | w'        | y         | y*        |
|----|----------|-----------|-----------|----------------|-----------|-----------|----------------|-----------|----------|------|-----------|-----------|-----------|-----------|-----------|
| 1  | 101.0709 | 101.0709  | 84.0444   |                | 129.0659  | 112.0393  |                | 44.0495   |          | Q    |           |           |           |           |           |
| 2  | 86.0964  | 214.1550  | 197.1285  |                | 242.1499  | 225.1234  |                | 186.1237  | 200.1394 | I    | 1137.6011 | 1150.6215 | 1164.6371 | 1195.6793 | 1178.6528 |
| 3  | 70.0651  | 311.2078  | 294.1812  |                | 339.2027  | 322.1761  |                | 285.1921  |          | P    | 1040.5483 | 1039.5531 |           | 1082.5953 | 1065.5687 |
| 4  | 86.0964  | 424.2918  | 407.2653  |                | 452.2867  | 435.2602  |                | 382.2449  |          | L    | 927.4643  | 926.4690  |           | 985.5425  | 968.5160  |
| 5  | 60.0444  | 511.3239  | 494.2973  | 493.3133       | 539.3188  | 522.2922  | 521.3082       | 495.3289  |          | S    | 840.4322  | 839.4370  |           | 872.4585  | 855.4319  |
| 6  | 30.0338  | 568.3453  | 551.3188  | 550.3348       | 596.3402  | 579.3137  | 578.3297       |           |          | G    |           |           |           | 785.4264  | 768.3999  |
| 7  | 70.0651  | 665.3981  | 648.3715  | 647.3875       | 693.3930  | 676.3665  | 675.3824       | 639.3824  |          | P    | 686.3580  | 685.3628  |           | 728.4050  | 711.3784  |
| 8  | 87.0553  | 779.4410  | 762.4145  | 761.4304       | 807.4359  | 790.4094  | 789.4254       | 736.4352  |          | N    | 572.3151  | 571.3198  |           | 631.3522  | 614.3256  |
| 9  | 60.0444  | 866.4730  | 849.4465  | 848.4625       | 894.4680  | 877.4414  | 876.4574       | 850.4781  |          | S    | 485.2831  | 484.2878  |           | 517.3093  | 500.2827  |
| 10 | 72.0808  | 965.5415  | 948.5149  | 947.5309       | 993.5364  | 976.5098  | 975.5258       | 951.5258  |          | V    | 386.2146  | 399.2350  |           | 430.2772  | 413.2507  |
| 11 | 72.0808  | 1064.6099 | 1047.5833 | 1046.5993      | 1092.6048 | 1075.5782 | 1074.5942      | 1050.5942 |          | V    | 287.1462  | 300.1666  |           | 331.2088  | 314.1823  |
| 12 | 30.0338  | 1121.6313 | 1104.6048 | 1103.6208      | 1149.6262 | 1132.5997 | 1131.6157      |           |          | G    |           |           |           | 232.1404  | 215.1139  |
| 13 | 129.1135 |           |           |                |           |           |                |           |          | R    | 74.0237   | 73.0284   |           | 175.1190  | 158.0924  |

| Seq   | ya       | yb       | Seq    | ya       | yb       | Seq     | ya       | yb       |
|-------|----------|----------|--------|----------|----------|---------|----------|----------|
| IP    | 183.1492 | 211.1441 | IPL    | 296.2333 | 324.2282 | IPLS    | 383.2653 | 411.2602 |
| IPLSG | 440.2867 | 468.2817 | IPLSGP | 537.3395 | 565.3344 | IPLSGPN | 651.3824 | 679.3774 |
| PL    | 183.1492 | 211.1441 | PLS    | 270.1812 | 298.1761 | PLSG    | 327.2027 | 355.1976 |
| PLSGP | 424.2554 | 452.2504 | PLSGPN | 538.2984 | 566.2933 | PLSGPNS | 625.3304 | 653.3253 |
| LS    | 173.1285 | 201.1234 | LSG    | 230.1499 | 258.1448 | LSGP    | 327.2027 | 355.1976 |
| LSGPN | 441.2456 | 469.2405 | LSGPNS | 528.2776 | 556.2726 | LSGPNSV | 627.3460 | 655.3410 |
| SG    | 117.0659 | 145.0608 | SGP    | 214.1186 | 242.1135 | SGPN    | 328.1615 | 356.1565 |
| SGPNS | 415.1936 | 443.1885 | SGPNSV | 514.2620 | 542.2569 | SGPNSVV | 613.3304 | 641.3253 |



|                          |                 |          |                       |                 |          |                        |          |                 |
|--------------------------|-----------------|----------|-----------------------|-----------------|----------|------------------------|----------|-----------------|
| <a href="#">SGPNSVVG</a> | 670.3519        | 698.3468 | <a href="#">GP</a>    | 127.0866        | 155.0815 | <a href="#">GPN</a>    | 241.1295 | 269.1244        |
| <a href="#">GPNS</a>     | 328.1615        | 356.1565 | <a href="#">GPNSV</a> | 427.2300        | 455.2249 | <a href="#">GPNSVV</a> | 526.2984 | 554.2933        |
| <a href="#">GPNSVVG</a>  | 583.3198        | 611.3148 | <a href="#">PN</a>    | <b>184.1081</b> | 212.1030 | <a href="#">PNS</a>    | 271.1401 | 299.1350        |
| <a href="#">PNSV</a>     | 370.2085        | 398.2034 | <a href="#">PNSVV</a> | 469.2769        | 497.2718 | <a href="#">PNSVVG</a> | 526.2984 | 554.2933        |
| <a href="#">NS</a>       | 174.0873        | 202.0822 | <a href="#">NSV</a>   | 273.1557        | 301.1506 | <a href="#">NSVV</a>   | 372.2241 | 400.2191        |
| <a href="#">NSVVG</a>    | 429.2456        | 457.2405 | <a href="#">SV</a>    | 159.1128        | 187.1077 | <a href="#">SVV</a>    | 258.1812 | <b>286.1761</b> |
| <a href="#">SVVG</a>     | 315.2027        | 343.1976 | <a href="#">VV</a>    | 171.1492        | 199.1441 | <a href="#">VVG</a>    | 228.1707 | 256.1656        |
| <a href="#">VG</a>       | <b>129.1022</b> | 157.0972 |                       |                 |          |                        |          |                 |

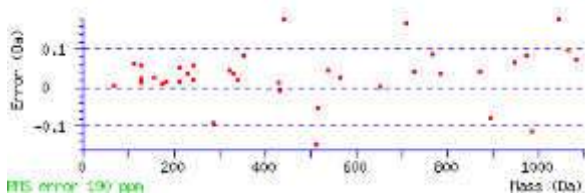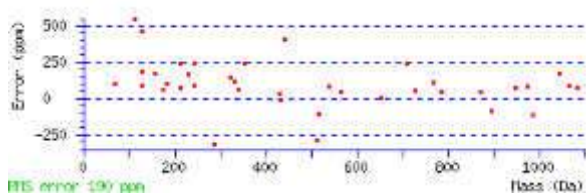

NCBI BLAST search of [QIPLSGPNSVVGR](#)

(Parameters: blastp, nr protein database, expect=20000, no filter, PAM30)

Other BLAST [web gateways](#)

#### All matches to this query

| Score | Mr(calc)  | Delta   | Sequence                       |
|-------|-----------|---------|--------------------------------|
| 57.4  | 1322.7307 | 0.0275  | <a href="#">QIPLSGPNSVVGR</a>  |
| 29.4  | 1322.6983 | 0.0598  | <a href="#">IQTVPGFASER</a>    |
| 24.2  | 1322.7670 | -0.0089 | <a href="#">LQPOEKLGVVGR</a>   |
| 23.1  | 1322.8034 | -0.0453 | <a href="#">KIPINLQTOIR</a>    |
| 20.0  | 1322.6731 | 0.0850  | <a href="#">AVAYFSPADARR</a>   |
| 19.4  | 1322.7055 | 0.0526  | <a href="#">QIEGAPATPGARR</a>  |
| 19.1  | 1322.7207 | 0.0374  | <a href="#">GALGVWVGAPRR</a>   |
| 19.0  | 1322.6691 | 0.0890  | <a href="#">GLAADENAPPGRR</a>  |
| 18.8  | 1322.7306 | 0.0275  | <a href="#">VAAAALNPVDAGVR</a> |
| 18.7  | 1322.7307 | 0.0275  | <a href="#">AAVVTPGGVNSPVR</a> |

Mascot: <http://www.matrixscience.com/>

**MATRIX SCIENCE Mascot Search Results**

**Peptide View Spot no 151**

MS/MS Fragmentation of **GTSQVEGVVTLTQDDQGPPTTVNVR**

Found in **gi42408425** in **NCBI**nr, putative superoxide dismutase [Cu-Zn], chloroplast precursor [Oryza sativa Japonica Group]

Match to Query 60: 2500.314024 from(2501.321300,1+) intensity(0.0000) index(19)

Title: Label: M10, Spot\_Id: 219830, Peak\_List\_Id: 226965, MSMS Job\_Run\_Id: 21862, Comment:

Data file C:\Documents and Settings\Administrator\Desktop\Farah-Garima 11May 2013\ppw\_M10\_136859956100.txt

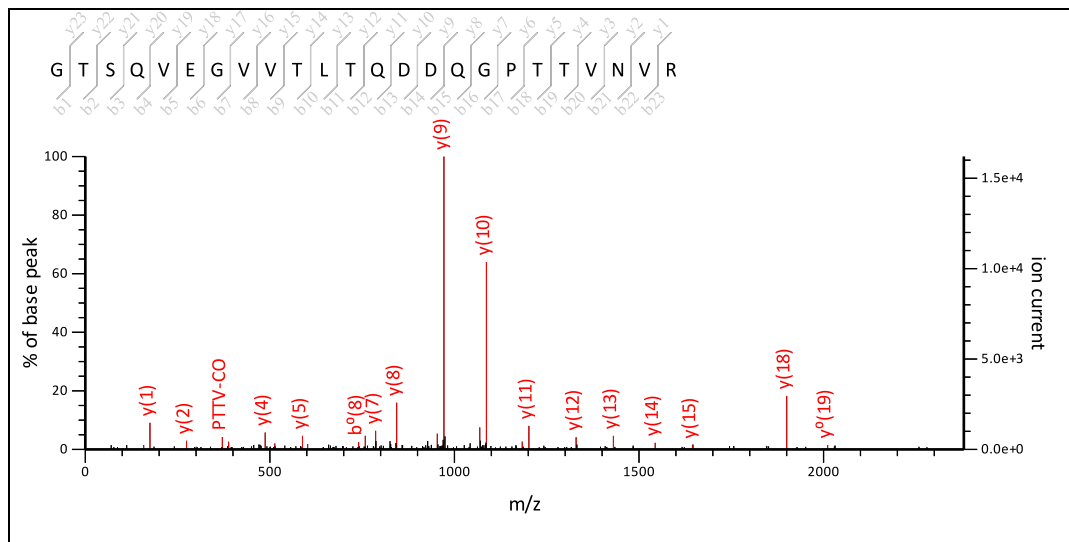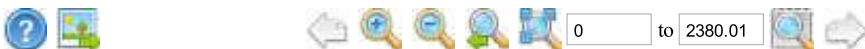

Label all possible matches  Label matches used for scoring

Monoisotopic mass of neutral peptide Mr(calc): 2500.2406

Fixed modifications: Carbamidomethyl (C) (apply to specified residues or termini only)

Ions Score: 108 Expect: 3.1e-07

Matches : 40/497 fragment ions using 42 most intense peaks ([help](#))

| #  | Immon.   | a         | a*        | a <sup>0</sup> | b               | b*        | b <sup>0</sup>  | d         | d'        | Seq. | v         | w         | w'        | y                | y*              |
|----|----------|-----------|-----------|----------------|-----------------|-----------|-----------------|-----------|-----------|------|-----------|-----------|-----------|------------------|-----------------|
| 1  | 30.0338  | 30.0338   |           |                | 58.0287         |           |                 | 44.0495   |           | G    |           |           |           |                  |                 |
| 2  | 74.0600  | 131.0815  |           | 113.0709       | 159.0764        |           | 141.0659        | 115.0866  | 117.0659  | T    | 2398.1845 | 2411.2049 | 2413.1841 | 2444.2263        | 2427.1998       |
| 3  | 60.0444  | 218.1135  |           | 200.1030       | 246.1084        |           | 228.0979        | 202.1186  |           | S    | 2311.1524 | 2310.1572 |           | 2343.1787        | 2326.1521       |
| 4  | 101.0709 | 346.1721  | 329.1456  | 328.1615       | 374.1670        | 357.1405  | 356.1565        | 289.1506  |           | Q    | 2183.0939 | 2182.0986 |           | 2256.1466        | 2239.1201       |
| 5  | 72.0808  | 445.2405  | 428.2140  | 427.2300       | 473.2354        | 456.2089  | 455.2249        | 431.2249  |           | V    | 2084.0255 | 2097.0459 |           | 2128.0881        | 2111.0615       |
| 6  | 102.0550 | 574.2831  | 557.2566  | 556.2726       | <b>602.2780</b> | 585.2515  | 584.2675        | 516.2776  |           | E    | 1954.9829 | 1953.9876 |           | 2029.0196        | 2011.9931       |
| 7  | 30.0338  | 631.3046  | 614.2780  | 613.2940       | 659.2995        | 642.2729  | 641.2889        |           |           | G    |           |           |           | <b>1899.9770</b> | 1882.9505       |
| 8  | 72.0808  | 730.3730  | 713.3464  | 712.3624       | <b>758.3679</b> | 741.3414  | <b>740.3573</b> | 716.3573  |           | V    | 1798.8930 | 1811.9134 |           | 1842.9556        | 1825.9290       |
| 9  | 72.0808  | 829.4414  | 812.4149  | 811.4308       | 857.4363        | 840.4098  | 839.4258        | 815.4258  |           | V    | 1699.8246 | 1712.8450 |           | 1743.8872        | 1726.8606       |
| 10 | 74.0600  | 930.4891  | 913.4625  | 912.4785       | 958.4840        | 941.4575  | 940.4734        | 914.4942  | 916.4734  | T    | 1598.7769 | 1611.7973 | 1613.7766 | <b>1644.8188</b> | 1627.7922       |
| 11 | 86.0964  | 1043.5732 | 1026.5466 | 1025.5626      | 1071.5681       | 1054.5415 | 1053.5575       | 1001.5262 |           | L    | 1485.6928 | 1484.6976 |           | <b>1543.7711</b> | 1526.7445       |
| 12 | 74.0600  | 1144.6208 | 1127.5943 | 1126.6103      | 1172.6157       | 1155.5892 | 1154.6052       | 1128.6259 | 1130.6052 | T    | 1384.6451 | 1397.6656 | 1399.6448 | <b>1430.6870</b> | 1413.6605       |
| 13 | 101.0709 | 1272.6794 | 1255.6529 | 1254.6688      | 1300.6743       | 1283.6478 | 1282.6638       | 1215.6579 |           | Q    | 1256.5866 | 1255.5913 |           | <b>1329.6393</b> | 1312.6128       |
| 14 | 88.0393  | 1387.7064 | 1370.6798 | 1369.6958      | 1415.7013       | 1398.6747 | 1397.6907       | 1343.7165 |           | D    | 1141.5596 | 1140.5644 |           | <b>1201.5808</b> | 1184.5542       |
| 15 | 88.0393  | 1502.7333 | 1485.7067 | 1484.7227      | 1530.7282       | 1513.7017 | 1512.7176       | 1458.7435 |           | D    | 1026.5327 | 1025.5374 |           | <b>1086.5538</b> | 1069.5273       |
| 16 | 101.0709 | 1630.7919 | 1613.7653 | 1612.7813      | 1658.7868       | 1641.7602 | 1640.7762       | 1573.7704 |           | Q    | 898.4741  | 897.4789  |           | <b>971.5269</b>  | 954.5003        |
| 17 | 30.0338  | 1687.8133 | 1670.7868 | 1669.8028      | 1715.8083       | 1698.7817 | 1697.7977       |           |           | G    |           |           |           | <b>843.4683</b>  | 826.4417        |
| 18 | 70.0651  | 1784.8661 | 1767.8396 | 1766.8555      | 1812.8610       | 1795.8345 | 1794.8505       | 1758.8505 |           | P    | 744.3999  | 743.4046  |           | <b>786.4468</b>  | 769.4203        |
| 19 | 74.0600  | 1885.9138 | 1868.8872 | 1867.9032      | 1913.9087       | 1896.8821 | 1895.8981       | 1869.9189 | 1871.8981 | T    | 643.3522  | 656.3726  | 658.3519  | 689.3941         | 672.3675        |
| 20 | 74.0600  | 1986.9615 | 1969.9349 | 1968.9509      | 2014.9564       | 1997.9298 | 1996.9458       | 1970.9665 | 1972.9458 | T    | 542.3045  | 555.3249  | 557.3042  | <b>588.3464</b>  | 571.3198        |
| 21 | 72.0808  | 2086.0299 | 2069.0033 | 2068.0193      | 2114.0248       | 2096.9982 | 2096.0142       | 2072.0142 |           | V    | 443.2361  | 456.2565  |           | <b>487.2987</b>  | 470.2722        |
| 22 | 87.0553  | 2200.0728 | 2183.0463 | 2182.0622      | 2228.0677       | 2211.0412 | 2210.0572       | 2157.0670 |           | N    | 329.1932  | 328.1979  |           | <b>388.2303</b>  | <b>371.2037</b> |

|    |          |           |           |           |           |           |           |           |  |   |          |          |  |          |          |
|----|----------|-----------|-----------|-----------|-----------|-----------|-----------|-----------|--|---|----------|----------|--|----------|----------|
| 23 | 72.0808  | 2299.1412 | 2282.1147 | 2281.1306 | 2327.1361 | 2310.1096 | 2309.1256 | 2285.1256 |  | V | 230.1248 | 243.1452 |  | 274.1874 | 257.1608 |
| 24 | 129.1135 |           |           |           |           |           |           |           |  | R | 74.0237  | 73.0284  |  | 175.1190 | 158.0924 |

| Seq    | ya       | yb       | Seq    | ya       | yb       | Seq     | ya       | yb       |
|--------|----------|----------|--------|----------|----------|---------|----------|----------|
| TS     | 161.0921 | 189.0870 | TSQ    | 289.1506 | 317.1456 | TSQV    | 388.2191 | 416.2140 |
| TSQVE  | 517.2617 | 545.2566 | TSQVEG | 574.2831 | 602.2780 | TSQVEGV | 673.3515 | 701.3464 |
| SQ     | 188.1030 | 216.0979 | SQV    | 287.1714 | 315.1663 | SQVE    | 416.2140 | 444.2089 |
| SQVEG  | 473.2354 | 501.2304 | SQVEGV | 572.3039 | 600.2988 | SQVEGVV | 671.3723 | 699.3672 |
| QV     | 200.1394 | 228.1343 | QVE    | 329.1819 | 357.1769 | QVEG    | 386.2034 | 414.1983 |
| QVEGV  | 485.2718 | 513.2667 | QVEGVV | 584.3402 | 612.3352 | QVEGVVT | 685.3879 | 713.3828 |
| VE     | 201.1234 | 229.1183 | VEG    | 258.1448 | 286.1397 | VEGV    | 357.2132 | 385.2082 |
| VEGVV  | 456.2817 | 484.2766 | VEGVVT | 557.3293 | 585.3243 | VEGVVTL | 670.4134 | 698.4083 |
| EG     | 159.0764 | 187.0713 | EGV    | 258.1448 | 286.1397 | EGVV    | 357.2132 | 385.2082 |
| EGVVT  | 458.2609 | 486.2558 | EGVVTL | 571.3450 | 599.3399 | EGVVTLT | 672.3927 | 700.3876 |
| GV     | 129.1022 | 157.0972 | GVV    | 228.1707 | 256.1656 | GVVT    | 329.2183 | 357.2132 |
| GVVTL  | 442.3024 | 470.2973 | GVVTLT | 543.3501 | 571.3450 | GVVTLTQ | 671.4087 | 699.4036 |
| VV     | 171.1492 | 199.1441 | VVT    | 272.1969 | 300.1918 | VVTL    | 385.2809 | 413.2758 |
| VVTLT  | 486.3286 | 514.3235 | VVTLTQ | 614.3872 | 642.3821 | VT      | 173.1285 | 201.1234 |
| VTL    | 286.2125 | 314.2074 | VTLT   | 387.2602 | 415.2551 | VTLTQ   | 515.3188 | 543.3137 |
| VTLTQD | 630.3457 | 658.3406 | TL     | 187.1441 | 215.1390 | TLT     | 288.1918 | 316.1867 |
| TLTQ   | 416.2504 | 444.2453 | TLTQD  | 531.2773 | 559.2722 | TLTQDD  | 646.3042 | 674.2992 |
| LT     | 187.1441 | 215.1390 | LTQ    | 315.2027 | 343.1976 | LTQD    | 430.2296 | 458.2245 |
| LTQDD  | 545.2566 | 573.2515 | LTQDDQ | 673.3151 | 701.3101 | TQ      | 202.1186 | 230.1135 |
| TQD    | 317.1456 | 345.1405 | TQDD   | 432.1725 | 460.1674 | TQDDQ   | 560.2311 | 588.2260 |
| TQDDQG | 617.2525 | 645.2475 | QD     | 216.0979 | 244.0928 | QDD     | 331.1248 | 359.1197 |
| QDDQ   | 459.1834 | 487.1783 | QDDQG  | 516.2049 | 544.1998 | QDDQGP  | 613.2576 | 641.2525 |
| DD     | 203.0662 | 231.0612 | DDQ    | 331.1248 | 359.1197 | DDQG    | 388.1463 | 416.1412 |
| DDQGP  | 485.1991 | 513.1940 | DDQGPT | 586.2467 | 614.2416 | DDQGPTT | 687.2944 | 715.2893 |
| DQ     | 216.0979 | 244.0928 | DQG    | 273.1193 | 301.1143 | DQGP    | 370.1721 | 398.1670 |
| DQGPT  | 471.2198 | 499.2147 | DQGPTT | 572.2675 | 600.2624 | DQGPTTV | 671.3359 | 699.3308 |
| QG     | 158.0924 | 186.0873 | QGP    | 255.1452 | 283.1401 | QGPT    | 356.1928 | 384.1878 |
| QGPTT  | 457.2405 | 485.2354 | QGPTTV | 556.3089 | 584.3039 | QGPTTVN | 670.3519 | 698.3468 |
| GP     | 127.0866 | 155.0815 | GPT    | 228.1343 | 256.1292 | GPTT    | 329.1819 | 357.1769 |
| GPTTV  | 428.2504 | 456.2453 | GPTTVN | 542.2933 | 570.2882 | GPTTVNV | 641.3617 | 669.3566 |
| PT     | 171.1128 | 199.1077 | PTT    | 272.1605 | 300.1554 | PTTV    | 371.2289 | 399.2238 |
| PTTVN  | 485.2718 | 513.2667 | PTTVNV | 584.3402 | 612.3352 | TT      | 175.1077 | 203.1026 |
| TTV    | 274.1761 | 302.1710 | TTVN   | 388.2191 | 416.2140 | TTNVN   | 487.2875 | 515.2824 |
| TV     | 173.1285 | 201.1234 | TVN    | 287.1714 | 315.1663 | TVNV    | 386.2398 | 414.2347 |
| VN     | 186.1237 | 214.1186 | VNV    | 285.1921 | 313.1870 | NV      | 186.1237 | 214.1186 |

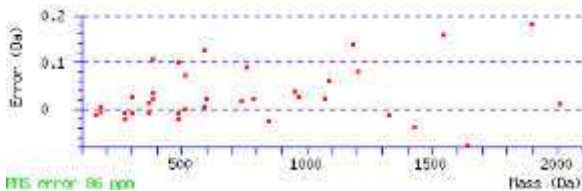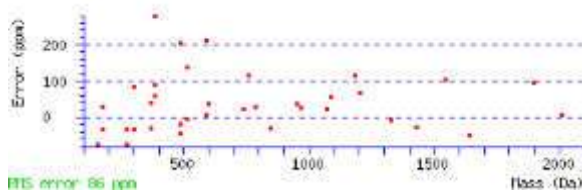

NCBI BLAST search of [GTSOVEGVVTLTODDQGPPTTVNV](#)  
 (Parameters: blastp, nr protein database, expect=20000, no filter, PAM30)  
 Other BLAST [web gateways](#)

All matches to this query

| Score | Mr(calcd) | Delta   | Sequence                                 |
|-------|-----------|---------|------------------------------------------|
| 108.2 | 2500.2406 | 0.0734  | <a href="#">GTSOVEGVVTLTODDQGPPTTVNV</a> |
| 26.0  | 2500.2406 | 0.0735  | <a href="#">GNSTVEGVVTLTQENEGPPTTVNV</a> |
| 21.9  | 2500.2347 | 0.0793  | <a href="#">EFHADGYSVKDGSVTSNPVWLTIV</a> |
| 21.0  | 2500.4087 | -0.0947 | <a href="#">LISGVLMLAINLEFKSPATNVVR</a>  |

|      |           |        |                                         |
|------|-----------|--------|-----------------------------------------|
| 20.5 | 2500.3002 | 0.0138 | <a href="#">YNAVGYTSSEVLLDYPAGVIPVR</a> |
| 17.7 | 2500.1515 | 0.1625 | <a href="#">FTLWVYMNTAGDGAELMHER</a>    |
| 16.9 | 2500.1475 | 0.1665 | <a href="#">LLGGCLGDGRVOMGDDSFHLEO</a>  |
| 16.6 | 2500.1507 | 0.1633 | <a href="#">ATHFPTVTTAWSDDGADPDDLK</a>  |
| 16.4 | 2500.0668 | 0.2472 | <a href="#">LCNMEYMIESKDGGEHSDLTR</a>   |
| 16.4 | 2500.0668 | 0.2472 | <a href="#">LCNMEYMIESKDGGEHSDLTR</a>   |

Mascot: <http://www.matrixscience.com/>



# Mascot Search Results

## Peptide View Spot no 154

### MS/MS Fragmentation of **HITIFSPEGR**

Found in [gi|449447912](#) in **NCBI**nr, PREDICTED: proteasome subunit alpha type-6-like [Cucumis sativus]

Match to Query 89: 1155.663124 from(1156.670400,1+) intensity(0.0000) index(18)

Title: Label: I20, Spot\_Id: 219986, Peak\_List\_Id: 229408, MSMS Job\_Run\_Id: 22020, Comment:

Data file C:\Documents and Settings\Administrator\Desktop\Farah-Garima 11May 2013\ppw\_I20\_136868358300.txt

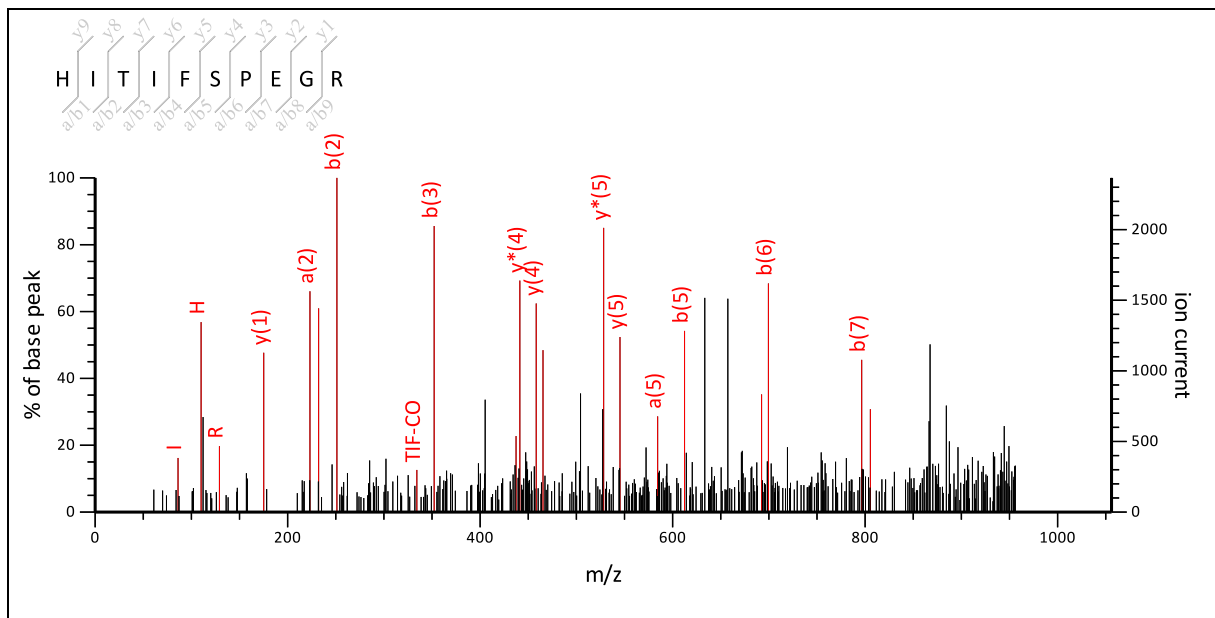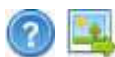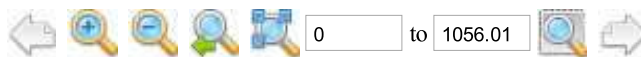

Label all possible matches  Label matches used for scoring

**Monoisotopic mass of neutral peptide Mr(calc):** 1155.6037

**Fixed modifications:** Carbamidomethyl (C) (apply to specified residues or termini only)

**Ions Score:** 41 **Expect:** 2.7

**Matches:** 24/145 fragment ions using 36 most intense peaks ([help](#))

| #  | Immon.   | a        | a <sup>0</sup> | b        | b <sup>0</sup> | d        | d'       | Seq. | v        | w        | w'       | y         | y*        | y <sup>0</sup> | #  |
|----|----------|----------|----------------|----------|----------------|----------|----------|------|----------|----------|----------|-----------|-----------|----------------|----|
| 1  | 110.0713 | 110.0713 |                | 138.0662 |                | 44.0495  |          | H    |          |          |          |           |           |                | 10 |
| 2  | 86.0964  | 223.1553 |                | 251.1503 |                | 195.1240 | 209.1397 | I    | 961.4738 | 974.4942 | 988.5098 | 1019.5520 | 1002.5255 | 1001.5415      | 9  |
| 3  | 74.0600  | 324.2030 | 306.1925       | 352.1979 | 334.1874       | 308.2081 | 310.1874 | T    | 860.4261 | 873.4465 | 875.4258 | 906.4680  | 889.4414  | 888.4574       | 8  |
| 4  | 86.0964  | 437.2871 | 419.2765       | 465.2820 | 447.2714       | 409.2558 | 423.2714 | I    | 747.3420 | 760.3624 | 774.3781 | 805.4203  | 788.3937  | 787.4097       | 7  |
| 5  | 120.0808 | 584.3555 | 566.3449       | 612.3504 | 594.3398       |          |          | F    | 600.2736 |          |          | 692.3362  | 675.3097  | 674.3256       | 6  |
| 6  | 60.0444  | 671.3875 | 653.3770       | 699.3824 | 681.3719       | 655.3926 |          | S    | 513.2416 | 512.2463 |          | 545.2678  | 528.2413  | 527.2572       | 5  |
| 7  | 70.0651  | 768.4403 | 750.4297       | 796.4352 | 778.4246       | 742.4246 |          | P    | 416.1888 | 415.1936 |          | 458.2358  | 441.2092  | 440.2252       | 4  |
| 8  | 102.0550 | 897.4829 | 879.4723       | 925.4778 | 907.4672       | 839.4774 |          | E    | 287.1462 | 286.1510 |          | 361.1830  | 344.1565  | 343.1724       | 3  |
| 9  | 30.0338  | 954.5043 | 936.4938       | 982.4993 | 964.4887       |          |          | G    |          |          |          | 232.1404  | 215.1139  |                | 2  |
| 10 | 129.1135 |          |                |          |                |          |          | R    | 74.0237  | 73.0284  |          | 175.1190  | 158.0924  |                | 1  |

| Seq    | ya       | yb       | Seq    | ya       | yb       | Seq   | ya       | yb       |
|--------|----------|----------|--------|----------|----------|-------|----------|----------|
| IT     | 187.1441 | 215.1390 | ITI    | 300.2282 | 328.2231 | ITIF  | 447.2966 | 475.2915 |
| ITIFS  | 534.3286 | 562.3235 | ITIFSP | 631.3814 | 659.3763 | TI    | 187.1441 | 215.1390 |
| TIF    | 334.2125 | 362.2074 | TIFS   | 421.2445 | 449.2395 | TIFSP | 518.2973 | 546.2922 |
| TIFSPE | 647.3399 | 675.3348 | IF     | 233.1648 | 261.1598 | IFS   | 320.1969 | 348.1918 |

|              |          |          |              |          |          |               |          |          |
|--------------|----------|----------|--------------|----------|----------|---------------|----------|----------|
| <b>IFSP</b>  | 417.2496 | 445.2445 | <b>IFSPE</b> | 546.2922 | 574.2871 | <b>IFSPEG</b> | 603.3137 | 631.3086 |
| <b>FS</b>    | 207.1128 | 235.1077 | <b>FSP</b>   | 304.1656 | 332.1605 | <b>FSPE</b>   | 433.2082 | 461.2031 |
| <b>FSPEG</b> | 490.2296 | 518.2245 | <b>SP</b>    | 157.0972 | 185.0921 | <b>SPE</b>    | 286.1397 | 314.1347 |
| <b>SPEG</b>  | 343.1612 | 371.1561 | <b>PE</b>    | 199.1077 | 227.1026 | <b>PEG</b>    | 256.1292 | 284.1241 |
| <b>EG</b>    | 159.0764 | 187.0713 |              |          |          |               |          |          |

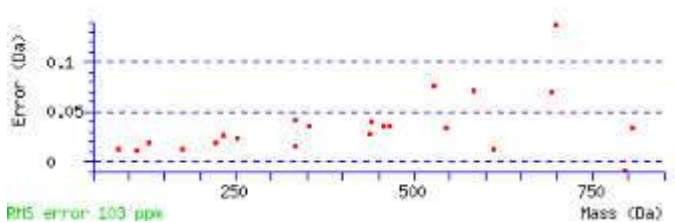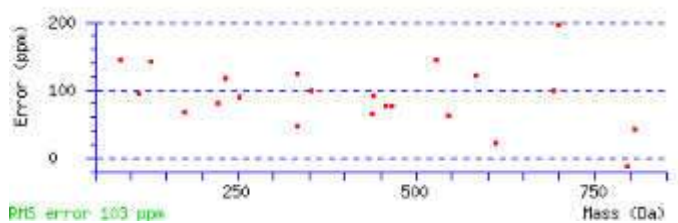

NCBI **BLAST** search of [HITIFSPEGR](#)

(Parameters: blastp, nr protein database, expect=20000, no filter, PAM30)

Other BLAST [web gateways](#)

#### All matches to this query

| Score | Mr(calc)  | Delta  | Sequence                    |
|-------|-----------|--------|-----------------------------|
| 40.8  | 1155.6037 | 0.0595 | <a href="#">HITIFSPEGR</a>  |
| 40.8  | 1155.6037 | 0.0595 | <a href="#">HLTIFSPEGR</a>  |
| 24.4  | 1155.6149 | 0.0483 | <a href="#">HLYGGKAPSAR</a> |
| 23.7  | 1155.6036 | 0.0595 | <a href="#">IHEIFSSPAR</a>  |
| 22.9  | 1155.5785 | 0.0846 | <a href="#">DVPHLPADR</a>   |
| 22.4  | 1155.5958 | 0.0673 | <a href="#">SYTIMSVALR</a>  |
| 22.3  | 1155.6288 | 0.0343 | <a href="#">HLELFVVGDK</a>  |
| 22.1  | 1155.6036 | 0.0595 | <a href="#">HLNQFLAADK</a>  |
| 22.0  | 1155.6360 | 0.0271 | <a href="#">RAGITLPADSR</a> |
| 21.9  | 1155.5996 | 0.0635 | <a href="#">LVGGREPSEGR</a> |

Mascot: <http://www.matrixscience.com/>



# Mascot Search Results

## Peptide View **Spot no 154**

MS/MS Fragmentation of **CDPAGHFFGHK**

Found in **gi|449447912** in **NCBI nr**, PREDICTED: proteasome subunit alpha type-6-like [Cucumis sativus]

Match to Query 116: 1271.602924 from(1272.610200,1+) intensity(0.0000) index(25)

Title: Label: I20, Spot\_Id: 219986, Peak\_List\_Id: 229420, MSMS Job\_Run\_Id: 22020, Comment:

Data file C:\Documents and Settings\Administrator\Desktop\Farah-Garima 11May 2013\ppw\_I20\_136868358300.txt

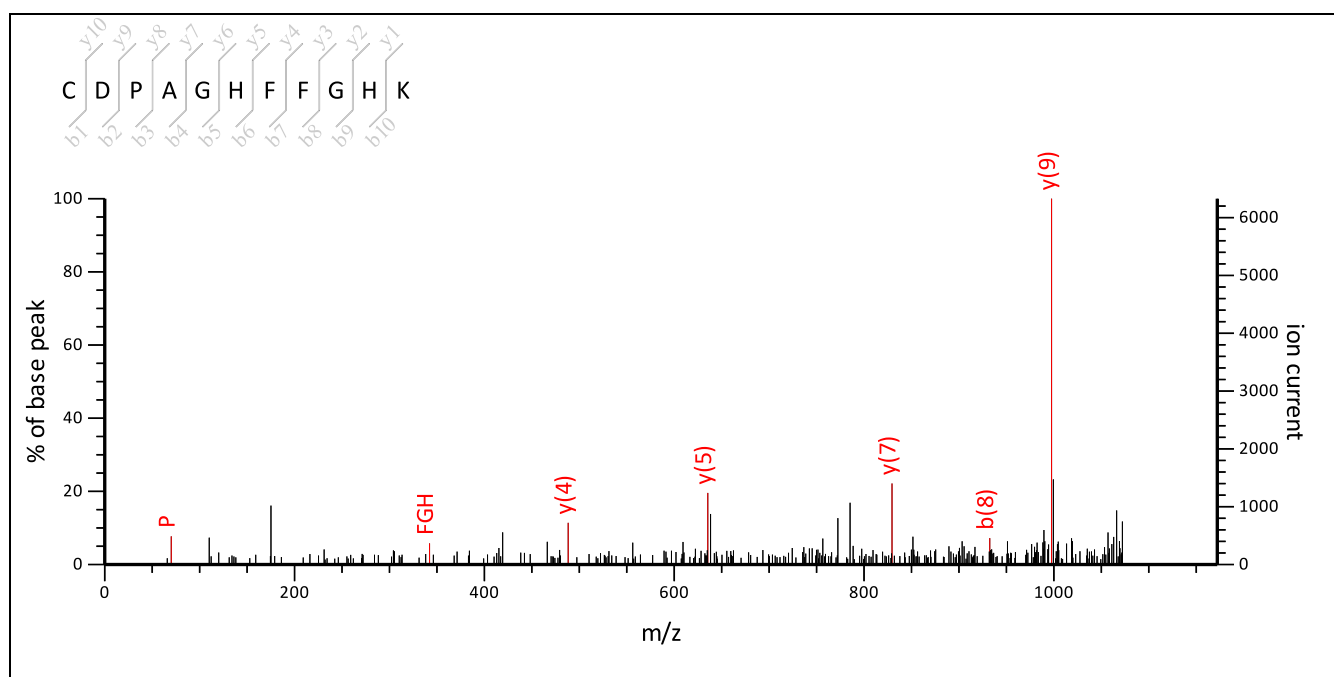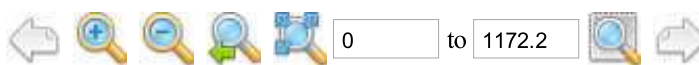

Label all possible matches  Label matches used for scoring

**Monoisotopic mass of neutral peptide Mr(calc):** 1271.5506

**Fixed modifications:** Carbamidomethyl (C) (apply to specified residues or termini only)

**Ions Score:** 21 **Expect:** 2.5e+02

**Matches:** 8/145 fragment ions using 11 most intense peaks ([help](#))

| #  | Immon.   | a         | a <sup>0</sup> | b         | b <sup>0</sup> | d        | Seq. | v         | w         | y         | y*        | y <sup>0</sup> | #  |
|----|----------|-----------|----------------|-----------|----------------|----------|------|-----------|-----------|-----------|-----------|----------------|----|
| 1  | 133.0430 | 133.0430  |                | 161.0379  |                | 44.0495  | C    |           |           |           |           |                | 11 |
| 2  | 88.0393  | 248.0700  | 230.0594       | 276.0649  | 258.0543       | 204.0801 | D    | 1052.5061 | 1051.5108 | 1112.5272 | 1095.5007 | 1094.5166      | 10 |
| 3  | 70.0651  | 345.1227  | 327.1122       | 373.1176  | 355.1071       | 319.1071 | P    | 955.4533  | 954.4581  | 997.5003  | 980.4737  |                | 9  |
| 4  | 44.0495  | 416.1598  | 398.1493       | 444.1547  | 426.1442       |          | A    | 884.4162  |           | 900.4475  | 883.4209  |                | 8  |
| 5  | 30.0338  | 473.1813  | 455.1707       | 501.1762  | 483.1656       |          | G    |           |           | 829.4104  | 812.3838  |                | 7  |
| 6  | 110.0713 | 610.2402  | 592.2296       | 638.2351  | 620.2246       |          | H    | 690.3358  |           | 772.3889  | 755.3624  |                | 6  |
| 7  | 120.0808 | 757.3086  | 739.2981       | 785.3035  | 767.2930       |          | F    | 543.2674  |           | 635.3300  | 618.3035  |                | 5  |
| 8  | 120.0808 | 904.3770  | 886.3665       | 932.3719  | 914.3614       |          | F    | 396.1990  |           | 488.2616  | 471.2350  |                | 4  |
| 9  | 30.0338  | 961.3985  | 943.3879       | 989.3934  | 971.3828       |          | G    |           |           | 341.1932  | 324.1666  |                | 3  |
| 10 | 110.0713 | 1098.4574 | 1080.4468      | 1126.4523 | 1108.4418      |          | H    | 202.1186  |           | 284.1717  | 267.1452  |                | 2  |
| 11 | 101.1073 |           |                |           |                |          | K    | 74.0237   | 73.0284   | 147.1128  | 130.0863  |                | 1  |



| Seq    | ya       | yb       | Seq     | ya       | yb       | Seq    | ya       | yb       |
|--------|----------|----------|---------|----------|----------|--------|----------|----------|
| DP     | 185.0921 | 213.0870 | DPA     | 256.1292 | 284.1241 | DPAG   | 313.1506 | 341.1456 |
| DPAGH  | 450.2096 | 478.2045 | DPAGHF  | 597.2780 | 625.2729 | PA     | 141.1022 | 169.0972 |
| PAG    | 198.1237 | 226.1186 | PAGH    | 335.1826 | 363.1775 | PAGHF  | 482.2510 | 510.2459 |
| PAGHFF | 629.3194 | 657.3144 | PAGHFFG | 686.3409 | 714.3358 | AG     | 101.0709 | 129.0659 |
| AGH    | 238.1299 | 266.1248 | AGHF    | 385.1983 | 413.1932 | AGHFF  | 532.2667 | 560.2616 |
| AGHFFG | 589.2881 | 617.2831 | GH      | 167.0927 | 195.0877 | GHF    | 314.1612 | 342.1561 |
| GHFF   | 461.2296 | 489.2245 | GHFFG   | 518.2510 | 546.2459 | GHFFGH | 655.3099 | 683.3049 |
| HF     | 257.1397 | 285.1346 | HFF     | 404.2081 | 432.2030 | HFFG   | 461.2296 | 489.2245 |
| HFFGH  | 598.2885 | 626.2834 | FF      | 267.1492 | 295.1441 | FFG    | 324.1707 | 352.1656 |
| FFGH   | 461.2296 | 489.2245 | FG      | 177.1022 | 205.0972 | FGH    | 314.1612 | 342.1561 |
| GH     | 167.0927 | 195.0877 |         |          |          |        |          |          |

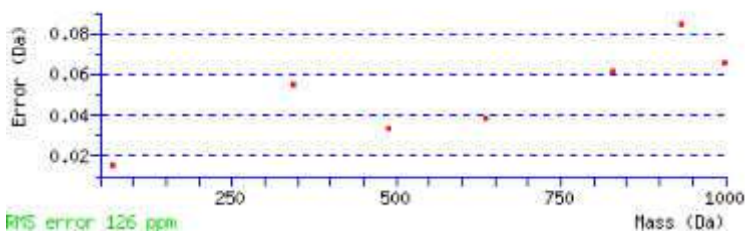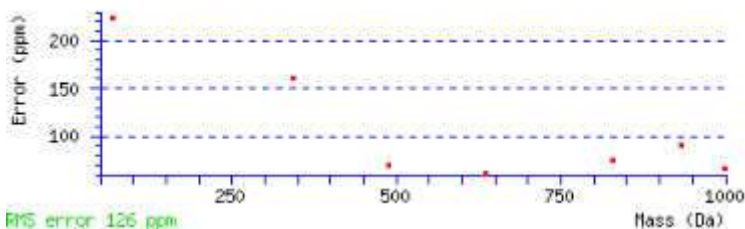

NCBI **BLAST** search of [CDPAGHFFGHK](#)

(Parameters: blastp, nr protein database, expect=20000, no filter, PAM30)

Other BLAST [web gateways](#)

#### All matches to this query

| Score | Mr(calc)  | Delta   | Sequence                     |
|-------|-----------|---------|------------------------------|
| 21.7  | 1271.6808 | -0.0779 | <a href="#">VVMNPPFNKAR</a>  |
| 21.4  | 1271.5506 | 0.0523  | <a href="#">CDPAGHFFGHK</a>  |
| 21.3  | 1271.6445 | -0.0415 | <a href="#">KFGHAPSEMLR</a>  |
| 19.6  | 1271.6002 | 0.0027  | <a href="#">KMGGMTFVDVR</a>  |
| 19.3  | 1271.5968 | 0.0061  | <a href="#">MKAGFSFPSER</a>  |
| 18.9  | 1271.6656 | -0.0627 | <a href="#">SMGPANQVTLVR</a> |
| 18.9  | 1271.7085 | -0.1056 | <a href="#">TSSPADLLLLSR</a> |
| 18.9  | 1271.5969 | 0.0061  | <a href="#">MGATGFGFELAR</a> |
| 18.6  | 1271.6907 | -0.0878 | <a href="#">HEKVTAMIVTK</a>  |
| 17.5  | 1271.6411 | -0.0382 | <a href="#">KFNFTFQANR</a>   |

Mascot: <http://www.matrixscience.com/>


**Mascot Search Results**
**Peptide View**    **Spot no 154**
**MS/MS Fragmentation of YLGLLATGITADAR**

 Found in [gi449447912](#) in **NCBI**Inr, PREDICTED: proteasome subunit alpha type-6-like [Cucumis sativus]

Match to Query 137: 1433.869924 from(1434.877200,1+) intensity(0.0000) index(30)

Title: Label:I20, Spot\_Id:219986, Peak\_List\_Id:229413, MSMS Job\_Run\_Id:22020, Comment:

Data file C:\Documents and Settings\Administrator\Desktop\Farah-Garima 11May 2013\ppw\_I20\_136868358300.txt

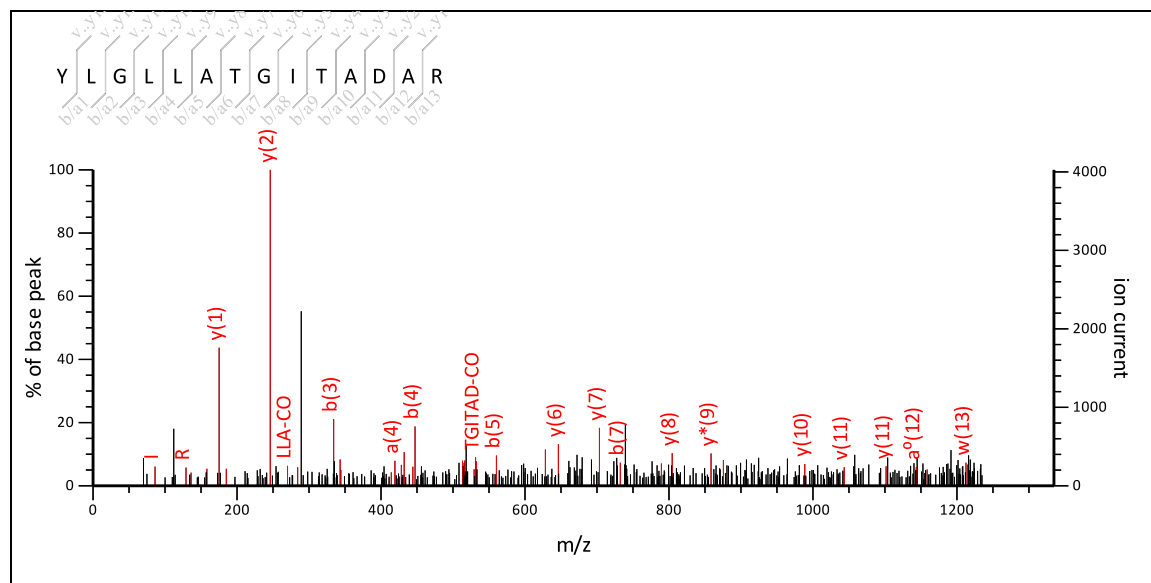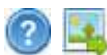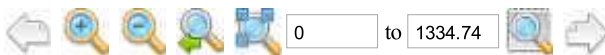
 Label all possible matches     Label matches used for scoring 
**Monoisotopic mass of neutral peptide Mr(calc):** 1433.7878

**Fixed modifications:** Carbamidomethyl (C) (apply to specified residues or termini only)

**Ions Score:** 37    **Expect:** 3.6

**Matches :** 60/228 fragment ions using 120 most intense peaks    ([help](#))

| #  | Immon.   | a         | a <sup>0</sup> | b         | b <sup>0</sup> | d         | d'       | Seq. | v         | w         | w'       | y         | y*        | y <sup>0</sup> | #  |
|----|----------|-----------|----------------|-----------|----------------|-----------|----------|------|-----------|-----------|----------|-----------|-----------|----------------|----|
| 1  | 136.0757 | 136.0757  |                | 164.0706  |                | 44.0495   |          | Y    |           |           |          |           |           |                | 14 |
| 2  | 86.0964  | 249.1598  |                | 277.1547  |                | 207.1128  |          | L    | 1213.6535 | 1212.6583 |          | 1271.7318 | 1254.7052 | 1253.7212      | 13 |
| 3  | 30.0338  | 306.1812  |                | 334.1761  |                |           |          | G    |           |           |          | 1158.6477 | 1141.6212 | 1140.6372      | 12 |
| 4  | 86.0964  | 419.2653  |                | 447.2602  |                | 377.2183  |          | L    | 1043.5480 | 1042.5528 |          | 1101.6263 | 1084.5997 | 1083.6157      | 11 |
| 5  | 86.0964  | 532.3493  |                | 560.3443  |                | 490.3024  |          | L    | 930.4639  | 929.4687  |          | 988.5422  | 971.5156  | 970.5316       | 10 |
| 6  | 44.0495  | 603.3865  |                | 631.3814  |                |           |          | A    | 859.4268  |           |          | 875.4581  | 858.4316  | 857.4476       | 9  |
| 7  | 74.0600  | 704.4341  | 686.4236       | 732.4291  | 714.4185       | 688.4392  | 690.4185 | T    | 758.3791  | 771.3995  | 773.3788 | 804.4210  | 787.3945  | 786.4104       | 8  |
| 8  | 30.0338  | 761.4556  | 743.4450       | 789.4505  | 771.4400       |           |          | G    |           |           |          | 703.3733  | 686.3468  | 685.3628       | 7  |
| 9  | 86.0964  | 874.5397  | 856.5291       | 902.5346  | 884.5240       | 846.5084  | 860.5240 | I    | 588.2736  | 601.2940  | 615.3097 | 646.3519  | 629.3253  | 628.3413       | 6  |
| 10 | 74.0600  | 975.5873  | 957.5768       | 1003.5823 | 985.5717       | 959.5924  | 961.5717 | T    | 487.2259  | 500.2463  | 502.2256 | 533.2678  | 516.2413  | 515.2572       | 5  |
| 11 | 44.0495  | 1046.6245 | 1028.6139      | 1074.6194 | 1056.6088      |           |          | A    | 416.1888  |           |          | 432.2201  | 415.1936  | 414.2096       | 4  |
| 12 | 88.0393  | 1161.6514 | 1143.6408      | 1189.6463 | 1171.6358      | 1117.6616 |          | D    | 301.1619  | 300.1666  |          | 361.1830  | 344.1565  | 343.1724       | 3  |
| 13 | 44.0495  | 1232.6885 | 1214.6780      | 1260.6834 | 1242.6729      |           |          | A    | 230.1248  |           |          | 246.1561  | 229.1295  |                | 2  |
| 14 | 129.1135 |           |                |           |                |           |          | R    | 74.0237   | 73.0284   |          | 175.1190  | 158.0924  |                | 1  |

| Seq   | ya       | yb       | Seq    | ya       | yb       | Seq     | ya       | yb       |
|-------|----------|----------|--------|----------|----------|---------|----------|----------|
| LG    | 143.1179 | 171.1128 | LGL    | 256.2020 | 284.1969 | LGLL    | 369.2860 | 397.2809 |
| LGLLA | 440.3231 | 468.3180 | LGLLAT | 541.3708 | 569.3657 | LGLLATG | 598.3923 | 626.3872 |
| GL    | 143.1179 | 171.1128 | GLL    | 256.2020 | 284.1969 | GLLA    | 327.2391 | 355.2340 |

|                 |          |          |                 |          |          |                |          |          |
|-----------------|----------|----------|-----------------|----------|----------|----------------|----------|----------|
| <b>GLLAT</b>    | 428.2867 | 456.2817 | <b>GLLATG</b>   | 485.3082 | 513.3031 | <b>GLLATGI</b> | 598.3923 | 626.3872 |
| <b>GLLATGIT</b> | 699.4400 | 727.4349 | <b>LL</b>       | 199.1805 | 227.1754 | <b>LLA</b>     | 270.2176 | 298.2125 |
| <b>LLAT</b>     | 371.2653 | 399.2602 | <b>LLATG</b>    | 428.2867 | 456.2817 | <b>LLATGI</b>  | 541.3708 | 569.3657 |
| <b>LLATGIT</b>  | 642.4185 | 670.4134 | <b>LA</b>       | 157.1335 | 185.1285 | <b>LAT</b>     | 258.1812 | 286.1761 |
| <b>LATG</b>     | 315.2027 | 343.1976 | <b>LATGI</b>    | 428.2867 | 456.2817 | <b>LATGIT</b>  | 529.3344 | 557.3293 |
| <b>LATGITA</b>  | 600.3715 | 628.3665 | <b>AT</b>       | 145.0972 | 173.0921 | <b>ATG</b>     | 202.1186 | 230.1135 |
| <b>ATGI</b>     | 315.2027 | 343.1976 | <b>ATGIT</b>    | 416.2504 | 444.2453 | <b>ATGITA</b>  | 487.2875 | 515.2824 |
| <b>ATGITAD</b>  | 602.3144 | 630.3093 | <b>ATGITADA</b> | 673.3515 | 701.3464 | <b>TG</b>      | 131.0815 | 159.0764 |
| <b>TGI</b>      | 244.1656 | 272.1605 | <b>TGIT</b>     | 345.2132 | 373.2082 | <b>TGITA</b>   | 416.2504 | 444.2453 |
| <b>TGITAD</b>   | 531.2773 | 559.2722 | <b>TGITADA</b>  | 602.3144 | 630.3093 | <b>GI</b>      | 143.1179 | 171.1128 |
| <b>GIT</b>      | 244.1656 | 272.1605 | <b>GITA</b>     | 315.2027 | 343.1976 | <b>GITAD</b>   | 430.2296 | 458.2245 |
| <b>GITADA</b>   | 501.2667 | 529.2617 | <b>IT</b>       | 187.1441 | 215.1390 | <b>ITA</b>     | 258.1812 | 286.1761 |
| <b>ITAD</b>     | 373.2082 | 401.2031 | <b>ITADA</b>    | 444.2453 | 472.2402 | <b>TA</b>      | 145.0972 | 173.0921 |
| <b>TAD</b>      | 260.1241 | 288.1190 | <b>TADA</b>     | 331.1612 | 359.1561 | <b>AD</b>      | 159.0764 | 187.0713 |
| <b>ADA</b>      | 230.1135 | 258.1084 | <b>DA</b>       | 159.0764 | 187.0713 |                |          |          |

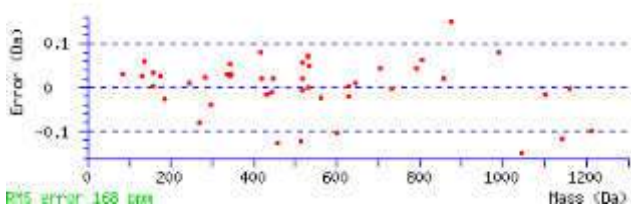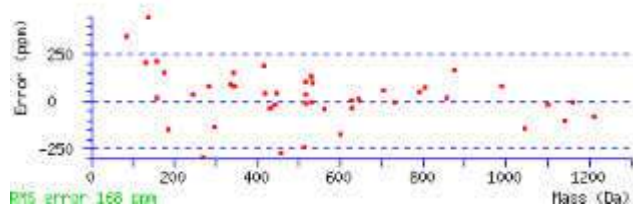

NCBI BLAST search of [YLGLLATGITADAR](#)

(Parameters: blastp, nr protein database, expect=20000, no filter, PAM30)

Other BLAST [web gateways](#)

#### All matches to this query

| Score | Mr(calc)  | Delta  | Sequence                       |
|-------|-----------|--------|--------------------------------|
| 36.7  | 1433.7878 | 0.0821 | <a href="#">YLGLLATGITADAR</a> |
| 36.3  | 1433.7878 | 0.0821 | <a href="#">YIGLLATGLTADAR</a> |
| 23.4  | 1433.7449 | 0.1250 | <a href="#">MSPDLVLFERNAR</a>  |
| 20.5  | 1433.7337 | 0.1363 | <a href="#">IYGEPAAAMAVVAR</a> |
| 20.5  | 1433.7337 | 0.1362 | <a href="#">TVVMLVNDPGEAR</a>  |
| 20.3  | 1433.7878 | 0.0821 | <a href="#">IVAYLVGTVSQER</a>  |
| 19.8  | 1433.7514 | 0.1185 | <a href="#">KDIGIYLVDER</a>    |
| 19.6  | 1433.7370 | 0.1329 | <a href="#">MSVIIMNDLLGGR</a>  |
| 19.1  | 1433.8242 | 0.0457 | <a href="#">LYGLLATTAKQOK</a>  |
| 17.2  | 1433.7627 | 0.1073 | <a href="#">LSVFNAAKDTVNR</a>  |

Mascot: <http://www.matrixscience.com/>
